# Supplementary material for: The impact of dapagliflozin for the myocardial metabolomic profiles of mice with chronic heart failure induced by a high fat diet
Source: Research Square preprint supplement (doi:10.21203/rs.3.rs-6881055/v1), 2025-06-25
Supplement: Supplementary file 1 [file 0a8d9514134c802d801d6c17.xlsx]

## Sheet: DEM
Accession	Chow1	Chow2	Chow3	Chow4	Chow5	Chow6	Chow7	Chow8	HDF1	HDF2	HDF3	HDF4	HDF5	HDF6	HDF7	HDF8	HDF_Mean	HDF_Median	HDF_RSD	Chow_Mean	Chow_Median	Chow_RSD	FC	log2FC	P.value	-log10(P.value)	FDR	VIP	Mass-to-charge ratio	Retention indices	Retention times(min)	Regulation
M103T303	577074	913469	388641	522184	425376	81785.6	406974	548868	726747	805001	974183	1.69811e+06	939245	990654	1.00516e+06	981280	1.01505e+06	977731	28.92	483047	473780	48.17	2.1	1.07	0.000621601	3.21	0.0104451	1.59176	103.004	303.1	5.1	Up
M103T52	1.58356e+06	8.93276e+06	7.82156e+06	1.10476e+07	5.64365e+06	7.4177e+06	7.75069e+06	1.00711e+07	1.27332e+07	1.28974e+07	1.2468e+07	1.19838e+07	1.45232e+07	1.02809e+07	1.22434e+07	1.20418e+07	1.23965e+07	1.23557e+07	9.49	7.53358e+06	7.78613e+06	38.82	1.65	0.72	0.0003108	3.51	0.00655521	1.36784	102.949	52.4	0.9	Up
M103T54	1.88581e+06	2.95445e+06	3.18167e+06	1.78855e+06	851251	1.08354e+06	4.14904e+06	3.31177e+06	4.07195e+06	3.2694e+06	2.33944e+06	4.01916e+06	3.74263e+06	4.21916e+06	3.4636e+06	3.98975e+06	3.63938e+06	3.86619e+06	16.93	2.40076e+06	2.42013e+06	48.73	1.52	0.6	0.0281274	1.55	0.119973	1.32444	102.933	53.7	0.9	Up
M103T83	6.08885e+07	5.59213e+07	5.67648e+07	7.67691e+07	5.65209e+07	5.00916e+07	5.96857e+07	6.95609e+07	5.98269e+07	7.87918e+07	9.95817e+07	6.8733e+07	8.40628e+07	6.52393e+07	6.68371e+07	8.76719e+07	7.63431e+07	7.37624e+07	17.7	6.07754e+07	5.82252e+07	13.99	1.26	0.33	0.014763	1.83	0.078691	1.50224	102.957	83.3	1.4	Up
M104T85	1.0502e+07	2.88103e+07	1.12207e+07	9.40154e+06	1.21498e+07	1.01331e+07	1.20409e+07	1.06822e+07	2.92648e+07	4.72017e+07	4.80354e+07	1.32066e+07	4.8652e+07	6.60149e+06	3.56896e+07	1.9145e+07	3.09746e+07	3.24772e+07	53.77	1.31176e+07	1.09514e+07	48.85	2.36	1.24	0.0206682	1.68	0.0984557	1.34135	104.035	84.6	1.4	Up
M108T336	310664	265168	357406	198239	328583	57366.9	359971	339487	131876	4358.63	90110.5	363093	90108.7	136296	15613.6	60823.4	111535	90109.6	100.8	277111	319623	37.51	0.4	-1.31	0.0498834	1.3	0.173853	1.26157	108.046	335.7	5.6	Down
M108T456	89094.6	241791	50980.4	224447	301228	123394	142525	87373.6	357580	521529	639672	162404	197751	133469	377580	199229	323652	278405	56.8	157604	132959	56.03	2.05	1.04	0.0498834	1.3	0.173853	1.27443	108.046	456.3	7.6	Up
M108T87	6.86909e+06	1.45851e+07	7.75461e+06	1.1399e+07	1.42139e+07	4.76084e+06	5.50251e+06	1.42897e+07	1.21926e+07	2.15143e+06	4.54116e+06	8.61766e+06	3.60157e+06	2.48713e+06	2.5097e+06	3.40681e+06	4.93851e+06	3.50419e+06	72.66	9.92184e+06	9576791	42.01	0.5	-1.01	0.014763	1.83	0.078691	1.41605	108.013	86.7	1.4	Down
M109T87	372190	549553	3.93478e+06	2.0211e+06	363410	546609	2.29282e+06	354276	381137	3.18139e+06	486129	2.71671e+06	3.14528e+06	4.31135e+06	5.59939e+06	4.15382e+06	2.9969e+06	3.16333e+06	60.64	1.30434e+06	548081	101.26	2.3	1.2	0.0498834	1.3	0.173853	1.05847	109.041	87	1.4	Up
M111T108	1.84875e+06	1.52305e+06	2.57646e+06	2.58724e+06	2.11072e+06	1.45979e+06	3.05065e+06	1.39288e+06	1.35717e+06	1.09096e+06	2.39131e+06	498245	1.31376e+06	411184	495667	510302	1.00857e+06	800629	67.68	2.06869e+06	1.97973e+06	29.83	0.49	-1.04	0.0029526	2.53	0.0288032	1.50677	111.009	107.6	1.8	Down
M111T122	6.90388e+07	9.46882e+07	7.65323e+07	9.9381e+07	8.17675e+07	1.18983e+08	1.1362e+08	9.08965e+07	6.12457e+07	5.68292e+07	4.9248e+07	9.46981e+07	7.22183e+07	5.59149e+07	5.87458e+07	9.68591e+07	6.82199e+07	5.99957e+07	26.67	9.31135e+07	9.27924e+07	18.69	0.73	-0.45	0.0281274	1.55	0.119973	1.46888	111.02	121.9	2	Down
M111T393	4.38013e+06	7.47404e+06	6.35074e+06	6.3372e+06	6.47221e+06	5.04447e+06	5.14249e+06	5.9482e+06	667717	4.57272e+06	1.10857e+06	2.40813e+06	729118	3.02076e+06	4.77828e+06	3.87047e+06	2.64447e+06	2.71444e+06	63.77	5.89369e+06	6.1427e+06	16.74	0.45	-1.16	0.000621601	3.21	0.0104451	1.60117	111.045	393.5	6.6	Down
M111T97_1	1.37825e+06	340727	2.17467e+06	944296	655354	1.10704e+06	1.96192e+06	1.64599e+06	111908	8746.36	14080	827279	34550.4	1.03722e+06	12213.8	165156	276395	73229.1	149.21	1.27603e+06	1.24265e+06	49.78	0.22	-2.21	0.0029526	2.53	0.0288032	1.67971	110.958	97.3	1.6	Down
M111T97_2	724206	902863	965964	577210	717230	871215	940811	889065	1.0794e+06	1.72434e+07	3.99283e+06	860514	5.38033e+06	1.04731e+07	1.13063e+07	2.15095e+06	6.56086e+06	4.68658e+06	89.6	823571	880140	16.47	7.97	2.99	0.0029526	2.53	0.0288032	1.69768	111.02	96.6	1.6	Up
M112T122	1.00599e+06	917607	795947	902715	4.36297e+06	721230	5.22792e+06	2.83547e+06	5.56737e+06	4.53699e+06	6.8067e+06	5.10613e+06	4.58931e+06	3.92936e+06	4.07259e+06	4.19607e+06	4.85057e+06	4.56315e+06	19.8	2.09623e+06	961798	86.61	2.31	1.21	0.014763	1.83	0.078691	1.71949	112.023	121.9	2	Up
M112T759	1.67235e+06	990097	428323	3.66578e+06	3.93913e+06	820056	882218	500817	5.92301e+06	3.59687e+06	8.71424e+06	1.01166e+06	5.74106e+06	841666	6.14849e+06	4.15554e+06	4.51657e+06	4.9483e+06	59.48	1.61235e+06	936157	87.14	2.8	1.49	0.0206682	1.68	0.0984557	1.34912	112.052	758.5	12.6	Up
M112T819	1.65947e+06	1.10019e+07	2.34591e+06	2.55116e+06	7.9459e+06	4.00622e+06	2.03567e+06	1.94809e+06	7.64295e+06	3.08575e+07	2.89636e+07	1.47777e+07	3.01547e+06	1.84058e+06	1.14119e+07	9.7427e+06	1.35316e+07	1.05773e+07	80.99	4.18679e+06	2.44853e+06	82.1	3.23	1.69	0.0498834	1.3	0.173853	1.25936	112.052	819.1	13.7	Up
M113T374	3.15185e+06	3.07723e+07	7.36828e+06	7.94968e+06	5.43821e+06	9.47387e+06	3.74696e+06	9.13116e+06	9.02182e+07	8.24257e+07	8.78218e+07	4.06465e+07	6.83377e+07	5.03431e+07	1.03405e+08	4.31974e+07	7.07994e+07	7.53817e+07	33.6	9.62904e+06	7.65898e+06	92	7.35	2.88	0.0001554	3.81	0.00449411	2.05996	112.986	373.8	6.2	Up
M113T765	1.00456e+09	8.50483e+08	7.36495e+08	3.56294e+07	7.25039e+08	9.01262e+08	2.94403e+09	6.43796e+08	5.96621e+07	2.36293e+07	9.99587e+07	4.74927e+08	1.11039e+08	4.42379e+08	3.20683e+07	4.51794e+08	2.11932e+08	1.05499e+08	96.62	9.80162e+08	7.93489e+08	86.31	0.22	-2.21	0.004662	2.33	0.0380456	1.35576	112.985	764.9	12.7	Down
M113T780	4.20953e+08	1.00767e+09	3.29822e+08	1.00901e+09	5.40977e+08	3.63316e+08	2.94616e+08	1.35488e+08	1.06266e+08	1.74962e+08	2.30999e+08	3.01365e+08	1.64154e+08	2.60968e+07	1.0691e+08	1.4996e+08	1.57589e+08	1.57057e+08	53.07	5.12731e+08	3.92135e+08	63.68	0.31	-1.7	0.004662	2.33	0.0380456	1.54182	112.985	779.8	13	Down
M113T84	1.5554e+08	9.12623e+07	9.39637e+07	3.04935e+08	1.50575e+08	2.07239e+08	1.2066e+08	1.73841e+08	4.18902e+08	3.23818e+08	8.56224e+08	1.6689e+08	4.38055e+08	1.55796e+08	4.91404e+08	4.07639e+08	4.07341e+08	4.13271e+08	53.92	1.62252e+08	1.53057e+08	43.04	2.51	1.33	0.004662	2.33	0.0380456	1.62801	112.986	84.1	1.4	Up
M113T85	13930.1	17271.4	17399.2	16696.8	18703.6	18314.7	17871.9	18420.3	19034.4	2.64783e+06	21184.4	21202.2	19773.1	1.71949e+06	1.8999e+06	1.87386e+06	1.02778e+06	870347	108.09	17326	17635.5	8.81	59.32	5.89	0.0001554	3.81	0.00449411	1.37275	113.036	85.2	1.4	Up
M114T742	3.87333e+06	2.48381e+06	4.74866e+06	870840	3.78941e+06	2.77638e+06	4.04535e+06	3.51767e+06	5.53092e+06	3.88308e+06	5.82978e+06	5.45109e+06	3.18288e+06	5.80851e+06	4.32336e+06	5.2102e+06	4.90248e+06	5.33065e+06	20.11	3.26318e+06	3.65354e+06	36.81	1.5	0.59	0.0104118	1.98	0.0628046	1.27101	113.989	742.2	12.4	Up
M114T94	633291	545933	577359	695801	430984	323326	527420	514643	816362	911170	866686	693039	765700	590516	591130	861349	761994	791031	16.41	531095	536677	21.75	1.43	0.52	0.0029526	2.53	0.0288032	1.68076	114.031	94.5	1.6	Up
M114T96	5.34606e+06	5.52136e+06	6.1253e+06	6.32065e+06	5.88998e+06	5.1052e+06	5.82861e+06	5.60479e+06	8.7876e+06	9.97538e+06	1.084e+07	8.96802e+06	6.34545e+06	9.66544e+06	1.15745e+07	8.99944e+06	9.39449e+06	9.33244e+06	16.71	5.71774e+06	5.7167e+06	7.05	1.64	0.72	0.0001554	3.81	0.00449411	2.07792	114.056	96.3	1.6	Up
M115T84	1.60787e+06	1.91698e+06	2.07896e+06	1.45464e+06	2.48508e+06	2.97852e+06	1.70433e+06	1.7569e+06	1.24863e+06	946847	1.34964e+06	1.52316e+06	1.06744e+06	1.92036e+06	1.60121e+06	904512	1.32023e+06	1.29914e+06	26.59	1.99791e+06	1.83694e+06	25.41	0.66	-0.6	0.00699301	2.16	0.0487438	1.60428	114.99	84	1.4	Down
M116T108	5.7147e+07	4.87102e+07	5.20563e+07	5.26868e+07	5.19251e+07	6.44054e+07	6.48093e+07	6.79375e+07	5.44228e+07	6.24342e+07	6.66513e+07	6.71481e+07	6.49103e+07	7.17878e+07	7.42979e+07	6.02412e+07	6.52367e+07	6.57808e+07	9.7	5.74597e+07	5.49169e+07	12.68	1.14	0.18	0.0498834	1.3	0.173853	1.2235	116.072	108	1.8	Up
M116T31	663619	927508	863577	833730	801590	772953	876433	894958	841323	905190	998435	897436	969917	929949	1.00349e+06	958751	938061	944350	5.91	829296	848654	10.06	1.13	0.18	0.004662	2.33	0.0380456	1.46112	115.921	31.1	0.5	Up
M116T565	1.32736e+06	1.21701e+06	3.91035e+06	3.98236e+06	1.24525e+06	3.30351e+06	1.18171e+06	1.16125e+06	4.36544e+06	2.95617e+06	4.01324e+06	5.19754e+06	4.33214e+06	4.0967e+06	3.44658e+06	3.73421e+06	4.01775e+06	4.05497e+06	16.7	2.1661e+06	1.28631e+06	60.61	1.85	0.89	0.00699301	2.16	0.0487438	1.57458	116.071	565.5	9.4	Up
M116T675	2.24656e+06	1.2996e+06	4.20127e+06	2.42443e+06	2.75875e+06	3.64348e+06	3.33701e+06	2.31692e+06	1.14248e+06	1.13506e+06	891547	1.62278e+06	757531	1.36904e+06	1.2868e+06	721358	1.11582e+06	1.13877e+06	28.05	2.7785e+06	2.59159e+06	33.02	0.4	-1.32	0.000621601	3.21	0.0104451	1.91111	116.071	675.3	11.3	Down
M116T732	4.2505e+06	5.06349e+06	3.53063e+06	3.85373e+06	2.65881e+06	3.6152e+06	1.79759e+06	3.5081e+06	2.21461e+06	1.79798e+06	1.09549e+06	1.88098e+06	2.76028e+06	1.93584e+06	2.61444e+06	1.22697e+06	1.94082e+06	1.90841e+06	30.47	3.53476e+06	3.57291e+06	27.77	0.55	-0.86	0.00699301	2.16	0.0487438	1.70704	116.071	732	12.2	Down
M116T99	1.18015e+06	2.50955e+06	1.27008e+06	2.06185e+06	3.6666e+06	4.64938e+06	1.05602e+06	2.79665e+06	2.93313e+06	2.60363e+06	3.00933e+06	3.50263e+06	4.79209e+06	4.33494e+06	3.96952e+06	6.37728e+06	3.94032e+06	3.73608e+06	31.35	2.39878e+06	2.2857e+06	53.48	1.64	0.72	0.0281274	1.55	0.119973	1.25817	116.035	99.2	1.7	Up
M117T74_1	2.11238e+06	6.07284e+06	6.10596e+06	5.96939e+06	4.44829e+06	5.89245e+06	3.96143e+06	9.28221e+06	1.05683e+07	1.78513e+07	8.20882e+06	1.09145e+07	1.12047e+07	1.62592e+07	2.35602e+07	1.38653e+07	1.40541e+07	1.2535e+07	35.47	5.48062e+06	5.93092e+06	37.97	2.56	1.36	0.0003108	3.51	0.00655521	1.81618	116.983	74.2	1.2	Up
M117T92	3.34954e+06	3.64921e+06	3.74552e+06	3.34353e+06	3.25565e+06	3.5194e+06	3.32464e+06	3.23614e+06	3.42621e+06	3.50432e+06	4.26602e+06	4.09955e+06	3.48267e+06	3.88819e+06	3.96842e+06	3.47391e+06	3.76366e+06	3.69626e+06	8.79	3.42795e+06	3.34653e+06	5.5	1.1	0.13	0.0379176	1.42	0.147066	1.3002	117.019	91.5	1.5	Up
M118T88	4.3769e+07	3.94991e+07	3.59289e+07	3.95977e+07	3.00195e+07	2.93879e+07	4.58342e+07	2.84064e+07	6.88272e+07	7.33195e+07	4.32745e+07	4.78223e+07	5.56982e+07	6.82808e+07	1.04556e+08	9.24712e+07	6.92812e+07	6.8554e+07	30.48	3.65553e+07	3.7714e+07	18.41	1.9	0.92	0.000621601	3.21	0.0104451	1.8409	118.051	87.8	1.5	Up
M119T31_1	56501.6	60246.9	61048.3	56341.1	72438.8	72836.7	61791.5	58669.6	49816.5	46766	58609.7	59632.6	49357.6	57934	56707.9	43757.6	52822.8	53262.2	11.56	62484.3	60647.6	10.51	0.85	-0.24	0.014763	1.83	0.078691	1.51047	118.9	30.8	0.5	Down
M119T31_2	248912	197844	233432	163716	182462	245266	220455	180767	176723	31421	32146.1	238171	48419.7	35362.3	162220	40908	95671.3	44663.9	86.86	209107	209150	15.46	0.46	-1.13	0.00699301	2.16	0.0487438	1.61445	118.927	31.1	0.5	Down
M122T494	1.33811e+06	2.06255e+06	1.64875e+06	2.22428e+06	1.47423e+06	995190	1.41124e+06	1.56894e+06	1.01926e+06	874947	829835	1.61266e+06	1.39594e+06	1.2215e+06	809639	1.38617e+06	1.14375e+06	1.12038e+06	26.57	1.59041e+06	1.52158e+06	24.84	0.72	-0.48	0.0281274	1.55	0.119973	1.30402	122.034	493.6	8.2	Down
M123T91	1.87018e+06	1.31111e+06	2.10678e+06	1.90489e+06	3.03446e+06	1.59958e+06	2.19511e+06	1.7616e+06	3.02952e+06	4.51653e+06	5.52993e+06	3.62254e+06	2.33507e+06	2.49224e+06	2.26598e+06	2.51378e+06	3.2882e+06	2.77165e+06	36.17	1.97296e+06	1.88753e+06	25.93	1.67	0.74	0.0029526	2.53	0.0288032	1.60768	122.976	90.6	1.5	Up
M124T116	126681	1.34835e+06	810340	784290	212890	1.12225e+06	870633	747987	1.06151e+06	1.1397e+06	1.03682e+06	889880	1.62392e+06	1.42249e+06	1.6937e+06	1.19694e+06	1.25812e+06	1.16832e+06	23.11	752928	797315	54.83	1.67	0.74	0.0104118	1.98	0.0628046	1.17547	123.902	115.8	1.9	Up
M125T256	148386	242699	189637	160052	212775	185846	252478	213528	373862	336801	332940	348813	329419	276374	265106	257032	315043	331179	13.66	200675	201206	18.35	1.57	0.65	0.0001554	3.81	0.00449411	1.91444	125.097	256.4	4.3	Up
M125T281	297416	297608	287833	257069	325467	314024	210719	263503	224742	176652	285862	218611	213768	239602	299119	150773	226141	221677	22.06	281705	292624	13.06	0.8	-0.32	0.0498834	1.3	0.173853	1.29846	125.047	281.5	4.7	Down
M127T103	1.43234e+06	1.46341e+06	1.86434e+06	1.14748e+06	4.40747e+06	2.14361e+06	4.44267e+06	4.01066e+06	6.54575e+06	5.13881e+06	6.86882e+06	5.93196e+06	5.25957e+06	5.04369e+06	4.75921e+06	5.09383e+06	5.58021e+06	5.19919e+06	13.9	2.614e+06	2.00397e+06	54.42	2.13	1.09	0.0001554	3.81	0.00449411	1.80154	127.04	102.7	1.7	Up
M127T44	204334	202967	200689	259934	187806	193540	217164	262659	265762	285108	274231	260562	321591	255732	276397	299919	279913	275314	7.84	216137	203650	13.49	1.3	0.37	0.0010878	2.96	0.0151734	1.89314	126.881	43.8	0.7	Up
M128T173	76872.1	834960	123298	113118	132689	145723	95790.1	105233	108207	145709	422952	1.15205e+06	276060	580728	412335	1.38688e+06	560616	417644	83.44	203460	118208	125.86	2.76	1.46	0.0281274	1.55	0.119973	1.26012	128.018	173.5	2.9	Up
M128T87	1.13053e+06	679844	1.20384e+06	1.00192e+06	990543	991840	1.19693e+06	792975	759702	1.40586e+06	1.49289e+06	1.29628e+06	1.38091e+06	1.43759e+06	1.03853e+06	1.45063e+06	1.2828e+06	1.39339e+06	19.86	998553	996878	18.65	1.28	0.36	0.0206682	1.68	0.0984557	1.25616	128.055	87.2	1.5	Up
M129T101	520891	515521	478511	530664	653021	838554	584641	481372	426938	217565	573494	537172	509116	399537	270673	391848	415793	413238	30.1	575397	525778	20.99	0.72	-0.47	0.0379176	1.42	0.147066	1.33536	128.983	101.5	1.7	Down
M129T111	2.97964e+06	1.30712e+06	2.73229e+06	2.1378e+06	1.39578e+06	793132	3.19434e+06	915574	2.85188e+06	3.67244e+06	5.69563e+06	3.62634e+06	4.7921e+06	4.09059e+06	1.90346e+06	4.19789e+06	3.85379e+06	3.88151e+06	29.97	1.93196e+06	1.76679e+06	49.42	1.99	1	0.004662	2.33	0.0380456	1.63915	128.96	111.4	1.9	Up
M129T80	4.18399e+06	4.05058e+06	4.42455e+06	5.05521e+06	9.82916e+06	4.10801e+06	6.16657e+06	8.40989e+06	4.11482e+06	557015	9.20505e+06	3.99692e+06	3.86952e+06	561300	539668	540217	2.92306e+06	2.21541e+06	104.62	5.7785e+06	4.73988e+06	38.23	0.51	-0.98	0.014763	1.83	0.078691	1.30962	129.039	80.4	1.3	Down
M129T84	4.26296e+07	4.36e+07	4.90124e+07	4.26348e+07	4.5276e+07	5.23236e+07	4.58631e+07	4.36699e+07	3.71662e+07	4.62451e+07	3.46788e+07	3.45813e+07	4.12679e+07	3.68686e+07	3.00931e+07	4.6387e+07	3.8411e+07	3.70174e+07	15.08	4.56262e+07	4.4473e+07	7.52	0.84	-0.25	0.0379176	1.42	0.147066	1.50126	128.96	84.4	1.4	Down
M130T153	4.18253e+07	2.71852e+07	2.8892e+07	3.0984e+07	2.49561e+07	4.66445e+07	1.97336e+07	1.74189e+07	1.979e+07	1.5994e+08	5.65831e+07	5.14245e+07	4.33292e+07	1.47547e+08	1.26396e+08	1.11391e+08	8.95501e+07	8.39873e+07	59.23	2.9705e+07	2.80386e+07	34.03	3.01	1.59	0.00699301	2.16	0.0487438	1.5059	130.087	153.2	2.6	Up
M130T457	55961.1	118926	59894.6	74642.3	33050.2	35672.6	44141.6	150869	301478	356152	598577	144694	158545	200917	153042	370331	285467	251197	54.77	71644.7	57927.8	58.85	3.98	1.99	0.0003108	3.51	0.00655521	1.92	130.041	457.1	7.6	Up
M130T95	7.35312e+08	6.84424e+08	2.80783e+08	6.93713e+08	8.40168e+08	5.14968e+08	5.85893e+08	5.53503e+08	1.08903e+09	7.01387e+08	6.4281e+08	8.93353e+08	9.88955e+08	8.49433e+08	8.18784e+08	7.14778e+08	8.37317e+08	8.34109e+08	18.13	6.11095e+08	6.35158e+08	27.83	1.37	0.45	0.014763	1.83	0.078691	1.26334	130.062	94.7	1.6	Up
M131T102	1.54991e+06	1.16483e+06	827381	889407	1.19297e+06	1.11439e+06	1.1948e+06	713777	440226	503643	538262	1.50764e+06	988679	1.01602e+06	515172	458857	746061	526717	51.74	1.08093e+06	1.13961e+06	24.46	0.69	-0.53	0.0498834	1.3	0.173853	1.2922	131.054	102	1.7	Down
M131T122	636584	250557	706093	114986	994741	985049	1.76834e+06	1.1856e+06	1.55662e+06	1.3486e+06	1.73672e+06	1.6862e+06	1.449e+06	1.31591e+06	1.21367e+06	1.10794e+06	1.42683e+06	1.3988e+06	15.59	830244	845571	63.7	1.72	0.78	0.014763	1.83	0.078691	1.30913	131.071	121.9	2	Up
M131T125	1.78918e+06	2.46064e+06	1.72738e+07	3.02838e+06	4.53028e+06	8.92448e+06	1.26116e+07	6.96279e+06	8.96112e+06	1.24356e+07	1.8515e+07	1.65988e+07	6.08057e+06	1.91738e+07	1.34827e+07	1.36585e+07	1.36133e+07	1.35706e+07	33.28	7.19765e+06	5.74654e+06	76.11	1.89	0.92	0.0281274	1.55	0.119973	1.37773	131.091	124.7	2.1	Up
M131T133	73209.2	113832	97223.5	123069	62013.7	54935.9	52683.5	61298.4	92147.8	175720	67608.3	147061	55154.8	574292	368369	397623	234747	161390	80.73	79783.1	67611.5	34.78	2.94	1.56	0.0498834	1.3	0.173853	1.2479	130.94	132.7	2.2	Up
M131T236	2.46072e+06	1.28787e+07	1.40439e+06	1.63096e+06	1.08652e+06	873151	1.66805e+06	1.38092e+06	511380	928123	1.52198e+06	1.97127e+06	440176	507934	523545	684865	886158	604205	63.81	2.92293e+06	1.51768e+06	138.57	0.3	-1.72	0.0281274	1.55	0.119973	1.30558	131.071	236.3	3.9	Down
M131T768	8.39357e+06	3.80436e+06	7.1571e+06	3.6337e+06	8.03359e+06	7.30506e+06	4.2412e+06	7.98764e+06	5.86179e+06	1.03579e+06	2.25359e+06	3.02274e+06	4.8532e+06	4.43734e+06	1.6314e+06	1.51918e+06	3.07688e+06	2.63817e+06	57.78	6.31953e+06	7.23108e+06	32.51	0.49	-1.04	0.014763	1.83	0.078691	1.53297	130.993	768.1	12.8	Down
M132T126	127375	145676	135496	124007	193038	149804	142024	260729	151030	174711	182478	332964	251930	354714	318724	165076	241453	217204	34.73	159769	143850	28.81	1.51	0.6	0.014763	1.83	0.078691	1.29433	132.03	125.6	2.1	Up
M132T216	222325	177466	214700	206884	298513	228033	139043	201844	235846	658572	430184	305536	248034	258556	243508	254110	329293	256333	44.83	211101	210792	21.56	1.56	0.64	0.0029526	2.53	0.0288032	1.33794	132.075	216.3	3.6	Up
M133T137	1.63372e+07	1.23249e+07	1.25175e+07	1.12061e+07	1.2058e+07	1.31293e+07	1.09159e+07	1.08513e+07	3.87408e+06	2.44761e+06	6.30064e+06	5.43284e+06	6.15669e+06	8.55862e+06	7.72452e+06	4.08172e+06	5.57209e+06	5.79476e+06	36.72	1.24175e+07	1.21914e+07	14.34	0.45	-1.16	0.0001554	3.81	0.00449411	1.92925	132.868	137	2.3	Down
M133T153	1.00563e+07	1.14869e+07	9.72496e+06	8.34097e+06	9.81371e+06	6.47441e+06	1.07602e+07	9.52294e+06	1.0633e+07	1.0218e+07	1.15464e+07	9.95218e+06	1.43656e+07	1.19735e+07	9.6653e+06	1.56685e+07	1.17528e+07	1.10897e+07	18.6	9.52255e+06	9.76933e+06	16.12	1.23	0.3	0.0379176	1.42	0.147066	1.30128	133.013	153.5	2.6	Up
M133T250	2.5436e+06	2.45094e+06	1.64823e+06	1.39689e+06	3.74564e+06	2.11381e+06	4.50603e+06	3.03712e+06	4.59366e+06	6.25513e+06	4.92618e+06	7.37428e+06	5.6297e+06	4.40006e+06	5.829e+06	7.2905e+06	5.78731e+06	5.72935e+06	19.72	2.68028e+06	2.49727e+06	39.13	2.16	1.11	0.0003108	3.51	0.00655521	1.91012	133.014	250.5	4.2	Up
M133T374	5.69786e+06	3.90723e+06	5.72875e+06	948346	4.77724e+06	4.44665e+06	6.48568e+06	4.47946e+06	2.25942e+06	761065	174890	2.1504e+06	2.76397e+06	3.58233e+06	153406	3.56874e+06	1.92678e+06	2.20491e+06	73.06	4.5589e+06	4.62835e+06	36.99	0.42	-1.24	0.0029526	2.53	0.0288032	1.3094	133.014	374.2	6.2	Down
M133T74_1	120370	620362	711810	496787	67677	455467	830297	543040	66560.6	79895.9	503797	75134.9	84316	502977	103579	79186	186931	82105.9	104.64	480726	519913	55.61	0.39	-1.36	0.0498834	1.3	0.173853	1.24896	132.976	74.2	1.2	Down
M133T97	4.00452e+06	3.70975e+06	7.32048e+06	3.48129e+06	7.5843e+06	951032	7.39981e+06	7.03784e+06	1.51727e+07	9.48149e+06	1.04266e+07	9.96327e+06	1.06285e+07	7.47106e+06	1.27404e+07	1.00707e+07	1.07443e+07	1.02486e+07	21.42	5.18613e+06	5.52118e+06	47.82	2.07	1.05	0.0003108	3.51	0.00655521	1.65242	133.051	96.9	1.6	Up
M134T126	36809.7	17984.8	25555.8	21528	34756	22106	47416.6	46773.2	774700	56427.8	538388	58611.5	44958.9	798931	487793	169078	366111	328436	88.28	31616.3	30155.9	36.48	11.58	3.53	0.000621601	3.21	0.0104451	1.77085	134.018	125.7	2.1	Up
M134T243	1.99755e+07	1.17207e+08	1.06068e+07	1.14154e+07	8.64984e+06	5.79148e+06	1.3329e+07	1.03397e+07	3.92079e+06	5.10276e+06	1.23097e+07	1.81418e+07	2.45653e+06	1.96481e+06	2.17795e+06	4.45653e+06	6.31637e+06	4.18866e+06	92.2	2.46643e+07	1.10111e+07	152.52	0.26	-1.97	0.0281274	1.55	0.119973	1.33034	134.047	243.4	4.1	Down
M134T284	866322	1.01661e+06	845413	912295	917976	412177	1.0656e+06	763518	675664	350815	630425	641157	638498	139731	297484	490802	483072	560613	41.24	849989	889308	23.62	0.57	-0.82	0.0029526	2.53	0.0288032	1.34043	134.018	284.3	4.7	Down
M134T31	38334.4	34260.2	49355.8	39285.5	46226.4	54477	66093.6	54751.3	72422.3	34329.1	62755.9	86169.8	71778.8	65044.1	59578.6	50425.6	62813	63900	24.8	47848	47791.1	22.03	1.31	0.39	0.0498834	1.3	0.173853	1.14915	133.924	30.8	0.5	Up
M134T433	3.10266e+06	7.07023e+06	3.72525e+06	9.53344e+06	2.36837e+06	2.41503e+06	4.60218e+06	4.49163e+06	2.17307e+06	3.14066e+06	3.01072e+06	1.93726e+06	3.09226e+06	2.37139e+06	1.21846e+06	2.85579e+06	2.47495e+06	2.61359e+06	27.43	4.6636e+06	4.10844e+06	53.26	0.53	-0.91	0.0206682	1.68	0.0984557	1.33693	134.048	433	7.2	Down
M134T456	81676.9	59827.3	92963.4	154342	169764	37156.4	72511.6	89167.7	575567	3.62646e+06	581826	175192	611706	206719	979352	314621	883931	578696	128.82	94676.1	85422.3	47.93	9.34	3.22	0.0001554	3.81	0.00449411	1.86832	134.036	455.7	7.6	Up
M135T148	1.6973e+08	2.00227e+08	1.72964e+08	1.62541e+08	2.21471e+08	1.58121e+08	1.52482e+08	3.61251e+08	1.98142e+08	2.33591e+08	4.04006e+08	2.12418e+08	2.90551e+08	3.139e+08	2.56263e+08	2.21502e+08	2.66297e+08	2.44927e+08	25.6	1.99848e+08	1.71347e+08	34.63	1.33	0.41	0.0206682	1.68	0.0984557	1.2605	135.031	148.5	2.5	Up
M135T335	4084.86	7325.01	26739.5	14671.9	4977.74	16590	24808.7	14101.5	7540.9	109983	36084.7	30055.1	40451.2	78461.6	62815.2	82534.4	55990.7	51633.2	59.73	14162.4	14386.7	60.29	3.95	1.98	0.0029526	2.53	0.0288032	1.57463	135.051	334.9	5.6	Up
M135T433	53223.2	28115.8	47692.7	156606	86829.2	39466.5	48073.1	43575.3	224543	405390	502224	78582.6	158522	82084.3	258402	268711	247307	241472	60.12	62947.7	47882.9	65.86	3.93	1.97	0.0018648	2.73	0.0213197	1.81502	135.051	433.1	7.2	Up
M135T528	81831.7	80752.9	87471.3	89853.5	50607.5	72927.3	25591.4	95880.4	26986.1	5775.08	38143.7	55930.3	29303	24124.7	29367.4	36470.7	30762.6	29335.2	46.09	73114.5	81292.3	32.3	0.42	-1.25	0.00699301	2.16	0.0487438	1.52527	135.082	528.5	8.8	Down
M135T798	2.50669e+06	2.828e+06	2.26091e+06	2.88311e+06	3.57833e+06	2.07564e+06	3.24223e+06	2.07314e+06	3.10301e+06	2.24101e+06	4.01872e+06	3.2674e+06	3.25327e+06	3.27152e+06	3.10803e+06	4.08605e+06	3.29363e+06	3.26033e+06	17.54	2.68101e+06	2.66734e+06	20.55	1.23	0.3	0.0498834	1.3	0.173853	1.21804	134.865	797.6	13.3	Up
M136T122	2.79555e+07	2.02188e+07	3.70073e+07	2.61583e+07	2.94064e+07	2.33268e+07	2.76905e+07	3.96586e+07	6.23503e+07	6.52585e+07	6.49026e+07	4.23043e+07	5.83686e+07	4.41287e+07	3.96618e+07	5.74028e+07	5.42972e+07	5.78857e+07	19.5	2.89278e+07	2.7823e+07	22.56	1.88	0.91	0.0001554	3.81	0.00449411	2.01706	136.034	121.9	2	Up
M136T520	841101	382656	649233	276494	937020	764008	1.16529e+06	659711	85561.9	41248.6	5854.4	238881	487057	473124	15310.2	536302	235417	162222	97.88	709439	711860	40.58	0.33	-1.59	0.004662	2.33	0.0380456	1.47877	136.05	520.2	8.7	Down
M136T74	374137	519617	459082	530173	443117	363361	450325	475519	523366	672990	537641	708217	581365	558131	529522	578926	586270	568528	11.68	451916	454703	13.3	1.3	0.38	0.000621601	3.21	0.0104451	1.74031	136.022	74.1	1.2	Up
M137T116	149284	129699	336349	281319	461605	300829	458637	456407	414005	525116	419517	191473	491355	534043	460683	624478	457584	476019	27.84	321766	318589	41.59	1.42	0.51	0.0498834	1.3	0.173853	1.0713	137.024	116.2	1.9	Up
M137T294	28396.9	167289	30932.4	23997.6	32890.8	156729	9498.06	114360	37513.7	611352	45656.1	318643	73409.3	1.20009e+06	1.38456e+06	2.0167e+06	710990	464998	104.5	70511.7	31911.6	91.85	10.08	3.33	0.014763	1.83	0.078691	1.32209	137.036	293.6	4.9	Up
M137T837	1.23795e+07	1.01805e+07	1.16082e+07	7.93552e+06	1.12935e+07	7.81428e+06	1.11189e+07	1.09618e+07	1.38578e+07	1.77414e+07	1.50695e+07	9.97756e+06	2.15753e+07	1.48838e+07	2.01915e+07	1.46184e+07	1.59894e+07	1.49767e+07	23.23	1.04115e+07	1.10404e+07	16.16	1.54	0.62	0.004662	2.33	0.0380456	1.72955	136.892	836.5	13.9	Up
M137T94	2.94803e+06	3.1569e+06	3.6917e+06	3.8514e+06	3.64184e+06	2.95009e+06	3.84028e+06	3.15525e+06	5.36469e+06	7.15985e+06	6.92925e+06	5.04927e+06	4.01403e+06	6.4375e+06	5.85953e+06	6.60081e+06	5.92687e+06	6.14852e+06	18.03	3.40444e+06	3.39937e+06	11.47	1.74	0.8	0.0001554	3.81	0.00449411	2.06271	137.036	93.5	1.6	Up
M138T224	609099	554195	611406	875328	412848	581756	853254	851239	1.17922e+06	1.75263e+06	1.02205e+06	1.22487e+06	995931	1.85653e+06	2.21895e+06	2.03253e+06	1.53534e+06	1.48875e+06	31.55	668641	610253	25.47	2.3	1.2	0.0001554	3.81	0.00449411	1.93272	138.056	223.8	3.7	Up
M138T336	279736	239027	333518	377282	275830	217749	354463	315693	808772	680694	604264	983569	481560	949010	661282	948159	764664	744733	24.27	299162	297714	18.65	2.56	1.35	0.0001554	3.81	0.00449411	2.13079	138.056	335.9	5.6	Up
M138T611	6.93426e+06	5.46838e+06	7.30213e+06	6.41495e+06	4.53719e+06	4.13082e+06	1.59649e+06	9.92412e+06	3.86781e+06	3.4782e+06	3.76097e+06	3.47931e+06	3.1562e+06	2.00974e+06	4.6024e+06	2.36283e+06	3.33968e+06	3.47875e+06	24.91	5.78854e+06	5.94167e+06	42.86	0.58	-0.79	0.0206682	1.68	0.0984557	1.14124	138.02	611	10.2	Down
M139T611	496130	570858	460034	596085	394833	960030	65218.9	743935	305191	213613	272978	412434	346440	150013	121231	265877	260972	269427	37.33	535891	533494	48.7	0.49	-1.04	0.014763	1.83	0.078691	1.07842	139.023	611.1	10.2	Down
M139T71	519482	614519	500398	506671	572869	290076	609851	497144	470220	335695	443104	441526	418159	256911	265036	307375	367253	376927	23.39	513876	513077	19.93	0.71	-0.48	0.004662	2.33	0.0380456	1.31957	139.04	70.8	1.2	Down
M139T77	3.4569e+06	3.33189e+06	4.17607e+06	2.99185e+06	5.00691e+06	3.94145e+06	3.93776e+06	3.17129e+06	2.72947e+06	2.61033e+06	2.57791e+06	3.29703e+06	2.30551e+06	3.33008e+06	2.72931e+06	2.27649e+06	2.73202e+06	2.66982e+06	14.54	3.75177e+06	3.69733e+06	17.46	0.73	-0.46	0.0018648	2.73	0.0213197	1.71904	138.98	77	1.3	Down
M141T118	424411	1.45323e+06	277951	239175	236365	229546	300622	268651	89329.2	68174	228538	439180	97582.2	97736.6	76492	103364	150050	97659.4	84.76	428743	273301	97.65	0.35	-1.51	0.00699301	2.16	0.0487438	1.53896	141.086	118.2	2	Down
M141T120	501121	608268	898426	569142	1.12213e+06	1.52951e+06	803461	624654	404199	281718	611127	585088	474844	646333	668068	171681	480382	529966	37.85	832089	714057	41.82	0.58	-0.79	0.0498834	1.3	0.173853	1.36977	141.019	120.1	2	Down
M141T82_2	2.05181e+06	1.50691e+06	1.82072e+06	1.6435e+06	1.52472e+06	3.60477e+06	2.10431e+06	1.84169e+06	2.34385e+06	2.48263e+06	1.85007e+06	3.37234e+06	3.55857e+06	2.8831e+06	2.90383e+06	3.00674e+06	2.80014e+06	2.89346e+06	19.9	2.0123e+06	1.83121e+06	33.81	1.39	0.48	0.0206682	1.68	0.0984557	1.32	141.056	81.5	1.4	Up
M141T92	503145	502528	447238	422799	440803	462045	445495	453681	438374	452535	406324	456317	395248	384881	334395	434453	412816	420388	9.98	459717	450459	6.28	0.9	-0.16	0.0281274	1.55	0.119973	1.34928	140.988	92	1.5	Down
M142T119	1.14029e+06	1.48571e+06	1.20411e+06	2.33043e+06	1.05452e+06	731693	2.04978e+06	2.08568e+06	2.46716e+06	2.49219e+06	2.76836e+06	2.39002e+06	2.26422e+06	2.14572e+06	2.27629e+06	1.66137e+06	2.30817e+06	2.33315e+06	13.95	1.51028e+06	1.34491e+06	38.28	1.53	0.61	0.004662	2.33	0.0380456	1.57361	142.051	118.7	2	Up
M142T342	242795	274949	343165	236373	479671	373166	343033	271753	719753	932091	856794	463722	605410	394910	692087	590555	656915	648749	27.83	320613	308991	25.47	2.05	1.03	0.000621601	3.21	0.0104451	1.90466	142.087	342.1	5.7	Up
M143T79	1.25862e+06	3.30507e+06	2.02908e+06	2.0623e+06	2.06776e+06	1.11086e+06	2.05257e+06	2.15956e+06	1.54693e+06	829374	1.3415e+06	951758	1.2895e+06	812163	801139	1.12115e+06	1.08669e+06	1.03645e+06	26.04	2.00573e+06	2.05743e+06	33.08	0.54	-0.88	0.00699301	2.16	0.0487438	1.64709	142.975	78.6	1.3	Down
M144T107	2.06165e+06	2.14259e+06	2.01686e+06	2.0957e+06	1.88168e+06	1.74069e+06	1.68725e+06	1.82201e+06	2.33072e+06	2.56028e+06	4.43643e+06	2.29337e+06	2.04494e+06	2.19878e+06	3.12508e+06	2.06904e+06	2.63233e+06	2.31205e+06	30.66	1.93105e+06	1.94927e+06	8.89	1.36	0.45	0.0029526	2.53	0.0288032	1.46372	144.03	107.4	1.8	Up
M144T303	154295	229441	178153	153357	180098	59568.8	153776	168782	262613	255871	204176	266499	340703	248627	234470	278295	261407	259242	15.02	159684	161539	29.78	1.64	0.71	0.0003108	3.51	0.00655521	1.65668	143.952	303	5	Up
M145T303	2913.34	4912.44	5765.32	7717.81	28274.1	3313.27	4337.29	4421.84	108697	1.68115e+06	579333	6145.99	427539	141439	676665	601128	527762	503436	100.45	7706.93	4667.14	109.55	68.48	6.1	0.000621601	3.21	0.0104451	1.95665	145.014	302.9	5	Up
M145T374	65788.4	41835.9	41418.9	136194	180059	13026.9	25501.4	47240.4	258814	562336	572984	324081	70676.9	121422	745945	281149	367176	302615	64.55	68883.2	44538.2	84.75	5.33	2.41	0.0018648	2.73	0.0213197	1.78521	145.014	373.8	6.2	Up
M145T399	2.36312e+06	1.7828e+06	2.39529e+06	2.30358e+06	2.79476e+06	1.22602e+06	3.54725e+06	3.69891e+06	1.04777e+06	95506.8	994115	613899	961192	1.25708e+06	37936.8	883486	736373	922339	61.17	2.51397e+06	2.3792e+06	33.03	0.29	-1.77	0.0003108	3.51	0.00655521	1.52133	145.087	398.9	6.6	Down
M145T429	1.19521e+06	1.3232e+06	1.15207e+06	1.48183e+06	1.2794e+06	353427	1.22226e+06	764020	2.21845e+06	4.73708e+06	3.22545e+06	1.01826e+06	1.83924e+06	2.83674e+06	4.94921e+06	2.99654e+06	2.97762e+06	2.91664e+06	45.37	1.09643e+06	1.20873e+06	33.15	2.72	1.44	0.004662	2.33	0.0380456	1.73448	144.962	428.9	7.1	Up
M145T61	280006	312901	318982	308569	335491	279479	311725	332977	363484	310503	364431	317874	326707	393435	347465	363439	348417	355452	8.1	310016	312313	6.79	1.12	0.17	0.0206682	1.68	0.0984557	1.51373	144.924	61.4	1	Up
M145T785	3.49499e+07	4.33917e+06	3.14783e+07	288078	3.36503e+07	1.74951e+07	1.74405e+07	3.08948e+07	9.34994e+06	1.90309e+06	1.8332e+06	559130	1.51595e+06	1.42142e+07	245660	345571	3.74585e+06	1.67457e+06	137.98	2.1317e+07	2.4195e+07	63.76	0.18	-2.51	0.014763	1.83	0.078691	1.34232	144.992	785.1	13.1	Down
M146T109	674217	328557	376555	309758	374417	243200	335270	1.03044e+06	1.58146e+06	2.53979e+06	1.20344e+06	845271	1.68849e+06	1.56151e+06	1.32792e+06	1.86715e+06	1.57688e+06	1.57148e+06	31.81	459051	354844	57.52	3.44	1.78	0.0003108	3.51	0.00655521	2.03013	146.054	109.4	1.8	Up
M147T104_2	696797	149611	1.03477e+06	785207	124897	169435	860201	960354	839199	2.60043e+06	1.35267e+06	1.14097e+06	1.2407e+06	2.3095e+06	2.05316e+06	2.4978e+06	1.7543e+06	1.70292e+06	39.17	597659	741002	64.62	2.94	1.55	0.0010878	2.96	0.0151734	1.69041	146.961	104.3	1.7	Up
M147T120	708135	518333	592488	603115	675867	534615	763041	865627	457086	574147	636220	398208	396790	478896	687863	542709	521490	510802	20.6	657653	639491	18.08	0.79	-0.33	0.0498834	1.3	0.173853	1.17473	147.066	119.8	2	Down
M147T303	3.7476e+06	3.80012e+06	8.27779e+06	1.65583e+07	9.19488e+06	6.46523e+06	1.39821e+07	8.04696e+06	1.02969e+07	1.61811e+07	1.57298e+07	1.29796e+07	1.06292e+07	1.29025e+07	9.94033e+06	1.82646e+07	1.33655e+07	1.2941e+07	23.06	8.75912e+06	8.16238e+06	51.78	1.53	0.61	0.0379176	1.42	0.147066	1.35903	147.045	303.4	5.1	Up
M147T37	6.14582e+06	4.68977e+06	7.97701e+06	6.50038e+06	5.78419e+06	4.69087e+06	9.26005e+06	6.43187e+06	387983	328160	534536	269926	376474	90321.7	285983	355380	328596	341770	38.32	6.435e+06	6.28885e+06	24.19	0.05	-4.29	0.0001554	3.81	0.00449411	2.21721	146.939	37.2	0.6	Down
M147T672	1.883e+06	6.77586e+06	374420	198824	181247	422610	720911	669727	60084.7	10084.9	1.86736e+06	4.19882e+06	41239.4	28995.8	37295.5	164330	801026	50662	188.85	1.40332e+06	546168	159.48	0.57	-0.81	0.0498834	1.3	0.173853	1.06705	146.988	672.3	11.2	Down
M147T773	497326	764345	567636	362726	706522	298312	707043	233670	1.75409e+06	444554	1.60269e+06	1.00876e+06	1.16887e+06	595518	966883	1.00438e+06	1.06822e+06	1.00657e+06	41.81	517198	532481	39.22	2.07	1.05	0.0104118	1.98	0.0628046	1.54442	146.994	773.2	12.9	Up
M147T84	6.17964e+06	378555	7.37715e+06	672776	2.74362e+06	3.35648e+06	465468	243188	6.92442e+06	1.60012e+07	668730	7.35494e+06	1.13143e+06	3.43103e+07	2.57425e+07	4.75025e+07	1.74545e+07	1.1678e+07	97.3	2.67711e+06	1.7082e+06	104.65	6.52	2.7	0.0281274	1.55	0.119973	1.24929	146.983	84.1	1.4	Up
M147T96	3.3789e+07	2.74325e+07	2.9219e+07	3.90377e+07	3.94553e+07	1.2654e+07	2.53508e+07	3.25709e+07	1.75806e+07	2.75114e+06	2.25239e+07	3.62837e+07	1.69871e+07	7.6806e+06	7.43406e+06	9.01128e+06	1.50315e+07	1.29992e+07	71.87	2.99387e+07	3.0895e+07	28.84	0.5	-0.99	0.014763	1.83	0.078691	1.34077	147.066	95.6	1.6	Down
M147T99	8.76819e+06	805841	1.77158e+06	9.44864e+06	9.19842e+06	1.09807e+07	1.63276e+06	1.19718e+07	1.7998e+07	2.20177e+07	1.65487e+07	9.3736e+06	1.90155e+07	1.5037e+07	1.14533e+07	1.75522e+07	1.61245e+07	1.70504e+07	25.4	6.82224e+06	8.98331e+06	67.58	2.36	1.24	0.0018648	2.73	0.0213197	1.4623	147.03	98.8	1.6	Up
M148T285	627302	597444	625098	399449	569995	295812	661388	483678	595235	1.22825e+06	818570	958079	960670	683061	874829	1.11341e+06	904014	916454	23.18	532521	583720	24.16	1.7	0.76	0.0018648	2.73	0.0213197	1.77602	148.049	284.9	4.7	Up
M149T37	146308	105456	166501	117322	31204	20103.7	44928.8	45971.7	24972.2	29878.6	17381.9	24507	35563.4	34408.5	28265.2	38719	29212	29071.9	23.83	84724.4	75713.7	66.32	0.34	-1.54	0.0206682	1.68	0.0984557	1.38916	148.942	36.9	0.6	Down
M149T57	260232	349791	306006	112900	290643	251537	333730	303197	348743	449522	421953	327058	404093	307467	286398	386579	366477	367661	15.83	276005	296920	26.72	1.33	0.41	0.0206682	1.68	0.0984557	1.21902	148.955	56.7	0.9	Up
M149T617	921332	1.21905e+06	968640	1.52188e+06	924023	707562	655029	1.1574e+06	959988	335346	322883	403399	700187	274607	637828	735955	546274	520613	45.26	1.00936e+06	946332	28.07	0.54	-0.89	0.00699301	2.16	0.0487438	1.57722	149.061	617.4	10.3	Down
M150T176	374427	256534	261885	351718	189402	195965	273648	301554	425813	463847	459189	341327	392348	343271	334669	458700	402395	409080	14.13	275641	267766	23.97	1.46	0.55	0.004662	2.33	0.0380456	1.74498	150.042	175.6	2.9	Up
M150T90	9.59044e+06	1.1253e+07	1.01981e+07	1.02283e+07	1.08538e+07	9.77497e+06	9.4777e+06	1.16902e+07	1.32941e+07	1.33386e+07	1.84863e+07	1.1533e+07	1.11429e+07	2.29346e+07	1.83883e+07	1.20407e+07	1.51448e+07	1.33163e+07	28.21	1.03833e+07	1.02132e+07	7.78	1.46	0.54	0.0010878	2.96	0.0151734	1.59563	149.987	90.3	1.5	Up
M151T370	377294	459665	292819	1.06866e+06	272060	748466	248927	748527	981988	4.58363e+07	5.58525e+06	1.59872e+06	1.83007e+06	1.64738e+06	4.6991e+06	1.54268e+06	7.96518e+06	1.73873e+06	193.26	527053	418480	56.27	15.11	3.92	0.0003108	3.51	0.00655521	1.6799	150.999	370.2	6.2	Up
M152T122	2.11884e+07	1.80997e+07	2.28107e+07	2.37446e+07	2.12585e+07	1.92957e+07	2.21843e+07	2.49611e+07	2.72089e+07	5.06899e+07	2.61828e+07	2.80666e+07	2.76364e+07	4.74585e+07	3.6402e+07	4.81852e+07	3.64788e+07	3.22343e+07	29.31	2.16929e+07	2.17214e+07	10.38	1.68	0.75	0.0001554	3.81	0.00449411	1.78203	152.029	121.7	2	Up
M152T31	18203.9	20799	15848.3	23182.3	16568.7	13637.9	17259.1	10028.7	54773	51651.8	28932.5	23400.2	17861.8	35894.3	34956.8	44590.1	36507.6	35425.6	35.98	16941	16913.9	23.98	2.15	1.11	0.0010878	2.96	0.0151734	1.75772	151.89	30.8	0.5	Up
M152T619	346189	518361	324986	902317	306939	393656	355092	664173	318469	239376	383467	302835	402625	232385	288216	297900	308159	300368	19.66	476464	374374	44.07	0.65	-0.63	0.0206682	1.68	0.0984557	1.26194	151.998	619.3	10.3	Down
M152T91_1	493526	556941	384279	469921	583431	341666	531064	413312	587830	622273	581804	612660	577542	545796	561929	573161	582874	579673	4.3	471768	481724	18.22	1.24	0.31	0.004662	2.33	0.0380456	1.56215	151.982	90.6	1.5	Up
M152T91_2	1.62023e+06	2.10538e+06	1.63181e+06	2.28713e+06	1.75417e+06	1.05492e+06	1.70831e+06	2.05129e+06	1.33184e+06	759341	1.52281e+06	2.11152e+06	1.36408e+06	1.04857e+06	924373	1.18614e+06	1.28109e+06	1.25899e+06	32.59	1.77666e+06	1.73124e+06	21.44	0.72	-0.47	0.0281274	1.55	0.119973	1.22342	152.065	90.7	1.5	Down
M153T31	33083.4	40532.8	146874	41784.3	29361.6	29694.8	27702.9	29323.5	49981.8	145295	141013	131063	116228	126475	35600.8	42824.4	98560.2	121351	47.84	47294.6	31389.1	85.82	2.08	1.06	0.0206682	1.68	0.0984557	1.37497	152.887	30.7	0.5	Up
M153T332	53466.1	41566.1	114117	69824.2	94163.8	17368.7	84334.4	19318.3	109951	326286	1.88361e+06	189071	179742	971857	1.04182e+06	1.69688e+06	799901	649071	88.72	61769.9	61645.2	56.79	12.95	3.69	0.0003108	3.51	0.00655521	1.89953	153.067	332.4	5.5	Up
M153T75	1.15312e+06	1.17868e+06	1.2396e+06	1.42104e+06	1.20543e+06	1.20737e+06	1.18801e+06	1.21651e+06	1.14236e+06	1.14576e+06	1.14499e+06	1.09183e+06	1.08612e+06	1.21456e+06	1.29991e+06	1.05306e+06	1.14732e+06	1.14368e+06	6.87	1.22622e+06	1.2064e+06	6.76	0.94	-0.1	0.0379176	1.42	0.147066	1.10138	152.986	74.9	1.2	Down
M154T101	6.31891e+06	6.11733e+06	6.35821e+06	6.22926e+06	6.94001e+06	7.06244e+06	5.71819e+06	7.52096e+06	7.04773e+06	7.67354e+06	7.99442e+06	6.69108e+06	7.73233e+06	6.59898e+06	8.33215e+06	7.47948e+06	7.44371e+06	7.57651e+06	8.29	6.53316e+06	6.33856e+06	9.01	1.14	0.19	0.014763	1.83	0.078691	1.47212	153.982	101.4	1.7	Up
M154T720	6.38552e+06	4.96634e+06	5.34832e+06	3.53211e+06	6.02373e+06	4.36062e+06	8.06199e+06	4.27709e+06	2.02522e+07	1.96102e+07	9.13448e+06	8.51408e+06	2.15834e+07	9.47758e+06	2.29342e+07	3.17987e+07	1.79131e+07	1.99312e+07	46.05	5.36946e+06	5.15733e+06	26.77	3.34	1.74	0.0001554	3.81	0.00449411	1.94647	153.992	720.4	12	Up
M154T760	181710	135039	199387	216268	172305	193239	351248	295615	263844	487697	302548	328752	303961	292427	253762	368478	325183	303254	23.01	218101	196313	32.43	1.49	0.58	0.014763	1.83	0.078691	1.56804	154.064	760	12.7	Up
M154T766	3.95886e+07	1.37683e+07	1.48346e+08	2.0807e+07	1.58507e+08	8.41551e+07	9.46907e+07	2.3217e+07	1.83687e+08	1.35197e+09	1.93883e+08	8.11575e+07	2.62928e+08	6.84155e+07	2.16796e+08	1.58355e+08	3.14649e+08	1.88785e+08	134.82	7.28849e+07	6.18719e+07	79.34	4.32	2.11	0.014763	1.83	0.078691	1.442	153.992	766.4	12.8	Up
M154T783	4.58416e+07	2.98537e+06	1.34326e+07	1.4907e+07	4.46486e+07	2.05405e+06	5.94291e+07	1.96022e+07	4.47587e+07	7.09426e+07	1.21683e+08	5.6989e+07	4.20078e+07	1.68572e+07	1.31973e+08	4.46667e+07	6.62348e+07	5.08738e+07	61.08	2.53626e+07	1.72546e+07	85.36	2.61	1.38	0.0379176	1.42	0.147066	1.45013	153.992	783.4	13.1	Up
M154T89	696847	715111	848058	903163	7.00931e+06	1.05945e+06	5.52125e+06	5.66507e+06	5.10981e+06	1.60781e+06	9.23635e+06	7.20105e+06	6.24935e+06	7.00782e+06	1.52165e+06	9.40145e+06	5.91691e+06	6.62858e+06	51.36	2.80228e+06	981307	97.76	2.11	1.08	0.0281274	1.55	0.119973	1.27048	153.998	88.7	1.5	Up
M155T648	574585	511860	368532	1.42561e+06	438738	176328	551078	488431	844690	1.07327e+06	1.95064e+06	862747	760171	651324	737578	1.13795e+06	1.0023e+06	853718	41.63	566895	500145	65.16	1.77	0.82	0.00699301	2.16	0.0487438	1.47576	155.108	647.6	10.8	Up
M155T82_2	1.35751e+07	1.38494e+07	1.29648e+07	1.20887e+07	1.25908e+07	1.15328e+07	1.3984e+07	1.3419e+07	1.0052e+07	9.4487e+06	9.45146e+06	1.03409e+07	9.27131e+06	1.05687e+07	9.50918e+06	9.97554e+06	9.82721e+06	9.74236e+06	4.84	1.30006e+07	1.31919e+07	6.72	0.76	-0.4	0.0001554	3.81	0.00449411	2.13985	154.928	82	1.4	Down
M155T93	950447	710740	1.02667e+06	894273	1.03442e+06	821793	835307	782985	1.42199e+06	1.74947e+06	810798	747039	1.21414e+06	1.75868e+06	2.3519e+06	1.18399e+06	1.40475e+06	1.31806e+06	38.16	882079	864790	13.13	1.59	0.67	0.0498834	1.3	0.173853	1.36374	155.035	92.6	1.5	Up
M155T94_1	2.47394e+06	2.18121e+06	2.87699e+06	2.64888e+06	3.34644e+06	3.25513e+06	2.01592e+06	2.07178e+06	1.90831e+06	5.62637e+06	3.00867e+06	4.06992e+06	3.53277e+06	3.78945e+06	3.47662e+06	6.16349e+06	3.94695e+06	3.66111e+06	34.8	2.60879e+06	2.56141e+06	19.85	1.51	0.6	0.0206682	1.68	0.0984557	1.2816	155.046	93.7	1.6	Up
M157T98	788917	2.07412e+06	712821	1.01489e+06	570721	1.08546e+06	530689	1.19025e+06	2.61869e+06	5.98113e+06	3.27134e+06	1.06146e+06	1.78928e+06	1.50957e+06	1.22046e+06	3.42374e+06	2.60946e+06	2.20398e+06	62.6	995984	901906	49.9	2.62	1.39	0.004662	2.33	0.0380456	1.53633	156.963	98.5	1.6	Up
M158T148	222534	242097	262597	292509	265930	396705	263133	371188	307987	416835	405401	412504	486188	481530	458145	394335	420366	414670	13.67	289587	264532	21.4	1.45	0.54	0.0010878	2.96	0.0151734	1.71837	158.046	147.7	2.5	Up
M158T285	143628	229914	352570	6348.29	133619	180992	3592.83	187974	212990	968384	275454	343144	313797	361404	494086	390618	419985	352274	56.31	154830	162310	74.05	2.71	1.44	0.0029526	2.53	0.0288032	1.23999	157.931	285.2	4.8	Up
M158T304	3.35882e+06	2.90454e+06	3.3823e+06	2.33284e+06	2.64678e+06	6.10826e+06	3.55674e+06	3.82911e+06	3.40625e+06	4.02139e+06	6.18843e+06	5.76777e+06	5.1677e+06	4.59792e+06	4.38237e+06	4.59144e+06	4.76541e+06	4.59468e+06	19.1	3.51492e+06	3.37056e+06	32.95	1.36	0.44	0.014763	1.83	0.078691	1.31723	158.082	304.2	5.1	Up
M158T431	96843.9	239025	101577	162700	76711.9	89122.4	76389.7	92603	57514.9	33202.8	113896	102147	55164.3	20253	41029.3	23925.9	55891.6	48096.8	62.47	116872	94723.4	48.26	0.48	-1.06	0.0379176	1.42	0.147066	1.48109	158.119	430.5	7.2	Down
M158T461	131302	167409	160440	233133	141288	95286.8	139780	114917	102126	90768.6	115285	130982	84416.2	61365	81182.8	104444	96321.3	96447.4	22.49	147945	140534	28.04	0.65	-0.62	0.004662	2.33	0.0380456	1.48743	158.065	461	7.7	Down
M159T141	351784	138779	159990	159037	398556	146905	744367	133996	580994	562312	818568	272970	379785	229261	762850	635617	530295	571653	41.03	279177	159513	76.93	1.9	0.93	0.0281274	1.55	0.119973	1.43532	158.847	141.3	2.4	Up
M159T465	1.64093e+06	2.22964e+06	3.44925e+06	2.11159e+06	2.7023e+06	3.21417e+06	4.88902e+06	1.41458e+07	6.32317e+06	1.08942e+08	3.48655e+07	6.79583e+07	2.58348e+07	1.88872e+07	2.12503e+07	3.77442e+06	3.59795e+07	2.35426e+07	98.97	4.29783e+06	2.95823e+06	95.49	8.37	3.07	0.0010878	2.96	0.0151734	1.72667	159.102	465.1	7.8	Up
M159T497	7.45044e+06	1.09598e+07	5.36896e+06	8.56863e+06	5.59441e+06	3.35853e+06	7.69955e+06	5.99335e+06	3.98974e+06	2.19981e+06	5.91859e+06	6.88868e+06	5.03986e+06	1.31271e+06	2.36627e+06	1.3248e+06	3.63006e+06	3.178e+06	59.18	6874208	6.72189e+06	33.72	0.53	-0.92	0.014763	1.83	0.078691	1.36919	159.102	496.6	8.3	Down
M159T550	1925.29	2613.4	7068.86	9229.78	8322.9	2569.54	9629.07	129593	34973	57968.7	150031	27810.5	130340	103686	191533	54743.2	93885.7	80827.3	63.36	21369	7695.88	205.17	4.39	2.14	0.0029526	2.53	0.0288032	1.82454	159.056	549.8	9.2	Up
M159T79	4.53177e+07	5.47105e+07	3.82299e+07	5.50946e+07	3.91697e+07	4.22218e+07	1.30499e+07	5.5578e+07	3.68608e+07	4.69071e+07	3.93111e+07	1.83916e+07	1.58905e+07	1.6543e+07	1.15284e+07	2.60283e+07	2.64326e+07	2.22099e+07	49.32	4.29215e+07	4.37698e+07	32.74	0.62	-0.7	0.0498834	1.3	0.173853	1.15911	158.925	78.7	1.3	Down
M159T89	633696	520829	513224	326271	383261	509314	508251	124143	625610	707795	858125	843334	185208	1.41111e+06	981921	733143	793280	788239	43.48	439874	508783	35.92	1.8	0.85	0.0104118	1.98	0.0628046	1.07063	159.072	89.2	1.5	Up
M159T90	1.25938e+07	2.39421e+06	1.69021e+06	1.40843e+07	2.54347e+06	3.15877e+07	1.23821e+07	2.5882e+06	1.72762e+06	1.14123e+08	3.34059e+07	2.0655e+07	2.0212e+07	8.71586e+07	8.63366e+07	5.36291e+07	5.2156e+07	4.35175e+07	76.5	9.983e+06	7.48516e+06	102.47	5.22	2.39	0.014763	1.83	0.078691	1.32997	158.978	90.1	1.5	Up
M159T97	912341	871637	936963	871946	1.10895e+06	1.0645e+06	1.10758e+06	648640	873971	2.15273e+06	1.07354e+06	2.57127e+06	1.69786e+06	2.88619e+06	3.21434e+06	2.85011e+06	2.165e+06	2.362e+06	40.31	940319	924652	16.43	2.3	1.2	0.00699301	2.16	0.0487438	1.69193	159.03	96.6	1.6	Up
M160T431	50268.3	118265	101923	30631.4	21585.8	145270	33212.8	30852.8	193583	492154	294802	298062	195328	385805	700122	343181	362880	320622	46.22	66501.1	41740.5	72.08	5.46	2.45	0.0001554	3.81	0.00449411	1.93108	160.052	430.9	7.2	Up
M160T465	3.2822e+06	1.90699e+06	2.58707e+06	1.87202e+06	2.39382e+06	1.0755e+06	2.31173e+06	1.79967e+06	1.11233e+06	148038	1.80481e+06	1.63738e+06	1.39462e+06	1.36938e+06	885051	1.09374e+06	1.18067e+06	1.24085e+06	43.49	2.15363e+06	2109363	30.26	0.55	-0.87	0.00699301	2.16	0.0487438	1.18746	160.106	465.1	7.8	Down
M161T134	8.36979e+06	8.44479e+06	8.42997e+06	1.04083e+07	5.44659e+06	7.82721e+06	6.20828e+06	8.70454e+06	8.94817e+06	1.45475e+07	1.01499e+07	1.2844e+07	9.87962e+06	1.46441e+07	1.57708e+07	1.59378e+07	1.28402e+07	1.36957e+07	21.93	7.97994e+06	8.39988e+06	19.28	1.61	0.69	0.0010878	2.96	0.0151734	1.73692	160.842	134.5	2.2	Up
M161T31_1	114100	99749.9	105692	86836.1	97446.5	82368.3	106633	92921	118644	109324	130131	138962	129567	114104	113681	139528	124243	124105	9.53	98218.4	98598.2	10.82	1.26	0.34	0.000621601	3.21	0.0104451	1.86552	160.918	30.8	0.5	Up
M161T31_2	71026.6	79959.6	93867.6	103030	81155.4	81604.4	104215	119829	97208.4	124345	108532	109615	146759	92232.4	107296	124835	113853	109074	15.38	91835.9	87736	17.75	1.24	0.31	0.0206682	1.68	0.0984557	1.411	160.936	31.1	0.5	Up
M161T465	40713.2	21054.6	6500.38	37455.6	27505.2	4221.4	43485.7	33254.5	101777	9647.84	93045.5	51120.6	61253.4	47671.8	120809	66240.5	68945.8	63747	51.14	26773.8	30379.9	56.16	2.58	1.36	0.004662	2.33	0.0380456	1.3329	161.107	465.2	7.8	Up
M161T517	6.79337e+06	5.36536e+06	5.95316e+06	6.96917e+06	1.42638e+07	3.73591e+06	6.29393e+06	3.0385e+07	5.12487e+07	5.56024e+07	4.22886e+07	3.24154e+07	6.7936e+07	3.59115e+07	4.22189e+07	6.24214e+07	4.87554e+07	4.67686e+07	25.99	9.96996e+06	6.54365e+06	88.42	4.89	2.29	0.0001554	3.81	0.00449411	2.08778	160.842	517.1	8.6	Up
M161T83_2	376542	457324	597591	419834	374655	368593	469367	127713	890618	776348	1.53862e+06	914841	554601	843877	666799	688333	859255	810113	34.96	398952	398188	33.34	2.15	1.11	0.0003108	3.51	0.00655521	1.72038	161.057	82.5	1.4	Up
M161T99_1	1.05767e+06	713000	970384	1.15436e+06	1.27895e+06	1.3217e+06	1.31848e+06	1.89769e+06	1.07608e+06	598638	287038	914891	413734	1.22097e+06	433761	1.04335e+06	748557	756765	47.68	1.21403e+06	1.21665e+06	28.41	0.62	-0.7	0.0206682	1.68	0.0984557	1.36666	160.976	99.5	1.7	Down
M162T383	81720.4	117681	83622.5	41862.6	126039	60818.7	140082	66896	30286.4	25422	8386.95	94273.5	36311.3	77824.1	25592.7	96115.4	49276.5	33298.8	70.15	89840.2	82671.4	38.52	0.55	-0.87	0.0498834	1.3	0.173853	1.29371	161.843	383.2	6.4	Down
M163T112	226556	181209	230512	167237	152705	123995	242602	242046	265101	303970	201104	249375	248406	203527	222053	263308	244605	248890	14.18	195858	203882	23.26	1.25	0.32	0.0379176	1.42	0.147066	1.32026	163.013	112.1	1.9	Up
M163T122	548995	462069	1.00395e+06	1.14895e+06	1.02925e+06	511837	677305	624396	1.38185e+06	1.28787e+06	1.74135e+06	1.51655e+06	1.4342e+06	1.03717e+06	1.19189e+06	1.7424e+06	1.41666e+06	1.40802e+06	17.58	750844	650851	35.69	1.89	0.92	0.0003108	3.51	0.00655521	1.90188	163.04	122.1	2	Up
M163T147	212865	235455	513145	452130	158362	52411.7	566105	497966	532212	784404	817429	477496	658414	941399	1.45514e+06	1.30489e+06	871424	800917	40.21	336055	343792	57.49	2.59	1.37	0.0018648	2.73	0.0213197	1.67306	163.04	147.4	2.5	Up
M163T421	363236	1.99384e+06	201536	289376	174314	90562.4	243104	191301	75663.2	139604	259685	364001	73063.2	88898.7	75675.1	80742.4	144667	84820.5	75.36	443408	222320	142.46	0.33	-1.62	0.0498834	1.3	0.173853	1.14483	163.077	420.6	7	Down
M163T498	806818	400307	1.1362e+06	713015	190487	554790	899210	580218	1.47302e+06	1.22844e+06	1.78315e+06	1.14719e+06	1.84896e+06	779584	1.09113e+06	287752	1.2049e+06	1.18781e+06	42.78	660130	646617	44.85	1.83	0.87	0.0281274	1.55	0.119973	1.15715	162.999	497.8	8.3	Up
M163T550	20631.2	35613.5	59713.4	88892	59212.7	20344.5	43352.1	516348	79776	136616	463184	191808	514546	1.01081e+06	1.19325e+06	456743	505842	459963	80.07	105513	51282.4	158.8	4.79	2.26	0.00699301	2.16	0.0487438	1.68301	162.954	549.9	9.2	Up
M163T60	240000	165117	202716	209602	242575	165843	257585	178664	295417	215206	303487	252498	258944	296714	261444	181024	258092	260194	16.55	207763	206159	17.43	1.24	0.31	0.014763	1.83	0.078691	1.33618	162.894	60	1	Up
M163T89	2.21179e+06	2.06023e+06	4.02971e+06	1.97046e+06	1.74044e+06	1.36452e+06	3.27482e+06	4.28743e+06	1.11196e+06	542244	1.49878e+06	5.61837e+06	1.25328e+06	1.23778e+06	515305	844074	1.57772e+06	1.17487e+06	105.82	2.61742e+06	2.13601e+06	41.97	0.6	-0.73	0.014763	1.83	0.078691	1.21108	163.025	89.5	1.5	Down
M164T285	9.65124e+07	4.716e+07	3.91171e+08	1.29214e+08	2.08714e+08	1.59508e+08	1.59825e+08	1.54447e+08	1.77496e+08	3.91435e+08	8.5178e+08	2.61849e+08	7.01589e+08	3.6776e+08	2.93292e+08	2.48341e+08	4.11693e+08	3.30526e+08	57.92	1.68319e+08	1.56978e+08	60.67	2.45	1.29	0.004662	2.33	0.0380456	1.57381	164.072	285.5	4.8	Up
M164T303_1	16587.8	22873	30582.1	101982	22782.5	14879.4	21660.6	47754.2	25079.4	49338	59730.9	27222.3	97459.1	110317	84920.5	59332.4	64175	59531.6	48.65	34887.7	22827.8	83.12	1.84	0.88	0.0281274	1.55	0.119973	1.27293	164.019	303.1	5.1	Up
M164T303_2	1.75932e+08	2.57541e+08	9.90728e+07	1.55319e+08	1.15681e+08	9.89229e+07	1.30756e+08	1.12683e+08	3.4702e+08	2.62475e+08	2.87506e+08	3.03173e+08	1.73815e+08	2.50189e+08	1.85354e+08	2.31917e+08	2.55181e+08	2.56332e+08	22.9	1.43239e+08	1.23219e+08	37.36	1.78	0.83	0.0029526	2.53	0.0288032	1.71741	164.072	303.4	5.1	Up
M164T589	2.43061e+06	2.37377e+06	1.94533e+06	1.5206e+06	1.52102e+06	1.13189e+06	1.36696e+06	3.05844e+06	1.51447e+06	807393	876614	914204	1.18105e+06	1.73679e+06	993839	1.56902e+06	1.19917e+06	1.08744e+06	30.01	1.91858e+06	1.73317e+06	34.17	0.63	-0.68	0.0281274	1.55	0.119973	1.40225	164.07	589.5	9.8	Down
M164T666	573111	1.36202e+06	1.04956e+06	923662	388315	544271	418199	1.06081e+06	1.58262e+06	1.48716e+06	816580	551874	1.47065e+06	1.11232e+06	2.31518e+06	3.53431e+06	1.60884e+06	1.47891e+06	58.65	789994	748386	45.21	2.04	1.03	0.0206682	1.68	0.0984557	1.28562	164.069	666	11.1	Up
M164T82	1.01713e+06	860275	991431	983406	730288	846123	827972	799359	1.57298e+06	1.66497e+06	1.83807e+06	1.22212e+06	1.38599e+06	1.45331e+06	2.3586e+06	1.28632e+06	1.59779e+06	1.51315e+06	23	881998	853199	11.74	1.81	0.86	0.0001554	3.81	0.00449411	2.04667	163.839	81.8	1.4	Up
M165T141	1.54676e+06	2.37887e+06	1.24779e+06	2.12684e+06	1.39039e+06	1.27363e+06	1.34616e+06	999197	856411	471683	1.33516e+06	1.31039e+06	1.02215e+06	279979	364378	468767	763615	664047	55.7	1.5387e+06	1.36827e+06	30.65	0.5	-1.01	0.00699301	2.16	0.0487438	1.55375	164.836	141.1	2.4	Down
M165T284	1.09861e+07	3.02939e+07	1.53933e+07	1.01079e+07	1.18111e+07	5.18589e+06	1.25367e+07	1.0162e+07	2.40104e+07	1.74503e+07	1.81918e+07	2.25988e+07	1.7278e+07	5.50297e+07	1.25401e+07	1.10323e+07	2.22664e+07	1.7821e+07	62.65	1.33096e+07	1.13986e+07	55.88	1.67	0.74	0.0281274	1.55	0.119973	1.092	165.076	284.3	4.7	Up
M165T31	70034.3	61398.6	91821.7	54576.9	58345.5	60261.2	44571.6	45329.5	72500.7	82290.7	72168.3	61231.1	72738.7	60773.5	75058.2	73834.3	71324.4	72619.7	10.02	60792.4	59303.4	24.84	1.17	0.23	0.0379176	1.42	0.147066	1.09373	164.927	31.5	0.5	Up
M165T344	1.7061e+06	1.68199e+06	1.51763e+06	1.72987e+06	1.90231e+06	1.68114e+06	1.8359e+06	1.7844e+06	1.99873e+06	3.17074e+06	2.2331e+06	1.92829e+06	2.1114e+06	1.62261e+06	1.82414e+06	2.02195e+06	2.11387e+06	2.01034e+06	21.99	1.72992e+06	1.71799e+06	6.71	1.22	0.29	0.014763	1.83	0.078691	1.30564	165.056	343.9	5.7	Up
M165T602	12121.5	17535.9	13858.7	144516	147017	12000.6	51041.7	17279	119082	219488	164644	13357	317532	34808.8	259577	256913	173175	192066	63.69	51921.3	17407.4	114.24	3.34	1.74	0.0281274	1.55	0.119973	1.33842	165.128	602.3	10	Up
M165T627	67880.8	112704	105806	28024.8	77237.6	25705.3	670777	97467.8	218719	164516	547371	475218	124451	191258	120331	329191	271382	204989	60.08	148200	87352.7	144.19	1.83	0.87	0.0104118	1.98	0.0628046	1.34719	165.092	627.3	10.5	Up
M165T679	7.94815e+06	1.64432e+07	5.69121e+06	1.46395e+07	9.21188e+06	2.18137e+06	6.67255e+06	5.34867e+06	1.24594e+07	5.95466e+07	1.55845e+07	6.27938e+06	1.95512e+07	2.72821e+07	3.60062e+07	3.25454e+07	2.61568e+07	2.34166e+07	64.49	8.51707e+06	7.31035e+06	56.6	3.07	1.62	0.0104118	1.98	0.0628046	1.53035	165.056	678.8	11.3	Up
M165T698	8.52538e+06	2.50876e+06	8.13631e+06	2.23123e+06	2.42968e+06	1.23878e+06	8.74719e+06	2.42857e+06	2.01229e+07	1.07073e+07	2.19856e+07	3.0447e+07	3.00728e+07	1.40127e+07	1.79801e+07	1.21414e+07	1.96837e+07	1.90515e+07	38.49	4.53074e+06	2.46922e+06	72.62	4.34	2.12	0.0001554	3.81	0.00449411	1.97867	164.836	697.7	11.6	Up
M165T83	1.39337e+06	1.58171e+06	1.44846e+06	1.63961e+06	1.53753e+06	1.21576e+06	1.52804e+06	1.74121e+06	1.00359e+06	1.12843e+06	1.19136e+06	1.0965e+06	1.16638e+06	1.02811e+06	1.16258e+06	1.06114e+06	1.10476e+06	1.11247e+06	6.24	1.51071e+06	1.53279e+06	10.63	0.73	-0.45	0.0001554	3.81	0.00449411	1.9853	164.957	83.3	1.4	Down
M165T96	1.97216e+07	1.8587e+07	1.40577e+07	1.96528e+07	1.8093e+07	5.6754e+06	1.79892e+07	1.51162e+07	1.06617e+07	81429.7	4.89185e+06	1.06024e+07	5.99123e+06	478819	295124	1.08859e+06	4.2614e+06	2.99022e+06	105.74	1.61116e+07	1.80411e+07	29.04	0.26	-1.92	0.0010878	2.96	0.0151734	1.51988	165.041	95.9	1.6	Down
M166T109	1.83643e+06	2.49735e+06	2.27978e+06	1.49539e+06	2.7554e+06	1.94659e+06	2.41902e+06	1.67821e+06	1.60965e+06	1.05811e+06	1.21257e+06	1.65669e+06	1.36713e+06	1.48941e+06	1.27682e+06	859884	1.31628e+06	1.32198e+06	20.74	2.11352e+06	2.11319e+06	20.83	0.62	-0.68	0.000621601	3.21	0.0104451	1.78434	166.051	109	1.8	Down
M166T303	185912	261747	198732	397018	165605	199401	178031	159045	459770	580002	473967	444871	358448	661803	651146	372823	500354	466869	23.52	218187	192322	36.14	2.29	1.2	0.000621601	3.21	0.0104451	1.96754	166.076	303.4	5.1	Up
M166T304	43998.3	74547.9	61912.7	59170.7	54546.5	39889.1	59443.2	57317.9	211401	164985	170930	142560	174959	269167	203623	172763	188798	173861	20.67	56353.3	58244.3	19.06	3.35	1.74	0.0001554	3.81	0.00449411	2.21804	166.099	304.1	5.1	Up
M166T433	1.4951e+06	3.27931e+06	3.74465e+06	5.05115e+06	2.19175e+06	1.84526e+06	3.00921e+06	4.41645e+06	1.20722e+06	231652	452210	1.18792e+06	1.84515e+06	1.10217e+06	874874	1.06698e+06	996023	1.08458e+06	49.67	3.12911e+06	3.14426e+06	40	0.32	-1.65	0.0003108	3.51	0.00655521	1.75556	165.986	432.8	7.2	Down
M166T98	2.49238e+08	2.01442e+08	1.87405e+08	1.7258e+08	1.44607e+08	1.11879e+08	2.22204e+08	2.26084e+08	2.73345e+08	2.76105e+08	2.56076e+08	2.77325e+08	3.09298e+08	1.81748e+08	2.37027e+08	3.33201e+08	2.68016e+08	2.74725e+08	17.09	1.8943e+08	1.94423e+08	23.98	1.41	0.5	0.004662	2.33	0.0380456	1.58585	166.018	98.3	1.6	Up
M167T368	1651.48	333.494	11645.7	11064	2732.96	215.503	1952.21	2901.35	26561.9	41482.6	28075.6	21165.6	30781.8	29410.1	27474.5	28237.6	29148.7	28156.6	19.67	4062.09	2342.59	113.43	7.18	2.84	0.0001554	3.81	0.00449411	1.95869	166.833	368.5	6.1	Up
M167T655	16850.2	25708	67120.3	37368.7	68072.8	58241.3	239584	47246.5	41929.5	133731	194763	436752	193325	273308	360415	97148.4	216421	194044	61.75	70024	52743.9	101.38	3.09	1.63	0.014763	1.83	0.078691	1.52276	167.144	654.9	10.9	Up
M167T82_2	2.46498e+06	2.18693e+06	2.85572e+06	2.24978e+06	726428	479503	2.0017e+06	2.53481e+06	1.86113e+06	4.515e+06	3.67329e+06	2.96148e+06	3.04306e+06	4.09705e+06	4.29388e+06	5.28936e+06	3.71678e+06	3.88517e+06	28.87	1.93748e+06	2.21836e+06	44.63	1.92	0.94	0.004662	2.33	0.0380456	1.50427	166.861	82.5	1.4	Up
M168T346	185919	173438	178864	198243	196359	220900	157753	138440	145782	122270	189036	142359	130108	174618	170982	81239.7	144549	144071	23.82	181240	182392	14.09	0.8	-0.33	0.0379176	1.42	0.147066	1.24208	168.103	345.9	5.8	Down
M168T624	22741.1	175267	213083	225085	102706	295805	47084.8	174152	791663	3.08436e+06	978076	111294	229806	554439	392662	1.04256e+06	898107	673051	105.28	156991	174709	59.33	5.72	2.52	0.004662	2.33	0.0380456	1.49889	168.03	624.4	10.4	Up
M168T81	4.1632e+07	4.3912e+07	4.30199e+07	4.36519e+07	4.32798e+07	4.13643e+07	4.16345e+07	4.11179e+07	4.25934e+07	4.46032e+07	5.50443e+07	4.83919e+07	4.63376e+07	4.76386e+07	4.75754e+07	4.44966e+07	47085113	4.69565e+07	7.99	4.24515e+07	4.23272e+07	2.65	1.11	0.15	0.0018648	2.73	0.0213197	1.6278	168.043	81.1	1.4	Up
M168T99	3.40222e+06	3.26797e+06	3.42747e+06	2.60821e+06	3.07829e+06	1.62701e+06	4.51243e+06	4.12118e+06	5.04557e+06	1.27125e+07	7.51839e+06	8.64436e+06	8.9841e+06	1.92218e+06	3.71798e+06	4.2688e+06	6.60174e+06	6.28198e+06	53.13	3.2556e+06	3.3351e+06	27.18	2.03	1.02	0.0206682	1.68	0.0984557	1.356	168.025	98.6	1.6	Up
M169T121	349564	421954	398158	428045	260424	527984	420054	484799	1.30917e+06	3.17163e+06	1.19987e+06	806714	921241	791445	1.92145e+06	999084	1.39008e+06	1.09948e+06	58.13	411373	421004	19.76	3.38	1.76	0.0001554	3.81	0.00449411	1.96002	169.013	121.2	2	Up
M169T247	246775	351639	407780	58321.1	520233	576179	243087	331144	517642	397517	424986	380433	388522	1.02653e+06	577837	708281	552718	471314	40.32	341895	341391	48.25	1.62	0.69	0.0498834	1.3	0.173853	1.06635	168.836	247.2	4.1	Up
M169T77	3.41107e+06	6.24289e+06	2.80521e+06	6.40458e+06	3.77437e+06	2.59313e+06	2.86401e+06	2.43408e+06	2.15922e+06	2.12138e+06	2.90988e+06	2.64144e+06	1.991e+06	1.1022e+06	1.71968e+06	2.42862e+06	2.13418e+06	2.1403e+06	26.29	3.81617e+06	3.13754e+06	42.12	0.56	-0.84	0.004662	2.33	0.0380456	1.49056	169.014	76.5	1.3	Down
M170T111	141416	178353	146020	200556	138469	19998.2	162335	133440	346410	294502	382210	308231	287766	541310	438639	643060	405266	364310	31.72	140073	143718	38.28	2.89	1.53	0.0001554	3.81	0.00449411	1.80029	170.094	110.5	1.8	Up
M170T363	109512	120728	123159	188153	131287	82748.7	106494	49190.9	382103	348421	487413	349294	406766	261308	445196	227387	363486	365699	24.08	113909	115120	35.08	3.19	1.67	0.0001554	3.81	0.00449411	2.07173	170.082	362.5	6	Up
M171T112	2.0635e+06	1.83362e+06	1.3005e+06	1.56095e+06	1.90921e+06	1.29945e+06	1.71407e+06	1.1344e+06	1.82471e+06	2.39523e+06	2.10455e+06	2.38497e+06	2.0622e+06	2.37244e+06	2.13104e+06	2.15855e+06	2.17921e+06	2.14479e+06	9.08	1.60196e+06	1.63751e+06	20.79	1.36	0.44	0.0018648	2.73	0.0213197	1.67227	171.078	112.4	1.9	Up
M171T121_2	4.46589e+06	5.2079e+06	7.95513e+06	5.31105e+06	9.88567e+06	1.22926e+07	6.09648e+06	6.34641e+06	2.65776e+06	2.35522e+06	4.73658e+06	3.81867e+06	3.3913e+06	5.68337e+06	6.0154e+06	2.5772e+06	3.90444e+06	3.60498e+06	36.61	7.19514e+06	6.22144e+06	37.39	0.54	-0.88	0.00699301	2.16	0.0487438	1.59987	171.066	121.5	2	Down
M171T148	372016	340397	596844	474911	1.66981e+06	1.41907e+06	489465	1.64153e+06	1.76285e+06	1.75649e+06	719176	1.25166e+06	496962	2.77301e+06	1.94825e+06	1.17512e+06	1.48544e+06	1.50408e+06	49.19	875506	543154	67.44	1.7	0.76	0.0498834	1.3	0.173853	1.02024	171.008	148.2	2.5	Up
M171T214	103674	122999	123247	128377	529573	264973	151636	141352	165962	343750	346667	147689	693511	344232	913871	349246	413116	345449	63.32	195729	134864	73.46	2.11	1.08	0.014763	1.83	0.078691	1.28593	170.871	214.4	3.6	Up
M171T345	1.03636e+06	898687	1.2074e+06	1.15825e+06	2.6226e+06	684213	3.65146e+06	1.4091e+06	2.5194e+06	3.75636e+06	3.53248e+06	2.66237e+06	2.48541e+06	1.81214e+06	1.13937e+06	4.11216e+06	2.75246e+06	2.59088e+06	36.55	1.58351e+06	1.18282e+06	64.43	1.74	0.8	0.0498834	1.3	0.173853	1.39058	170.833	344.5	5.7	Up
M171T375	2.02915e+06	5.84318e+06	1.6521e+06	2.47686e+06	1.5537e+06	876355	1.65551e+06	1.58401e+06	819924	230851	2.29275e+06	1.34935e+06	818386	1.17719e+06	317860	1.95744e+06	1.12047e+06	998555	65.3	2.20886e+06	1.6538e+06	69.56	0.51	-0.98	0.0498834	1.3	0.173853	1.15894	171.012	375.4	6.3	Down
M171T383_2	334023	154455	260935	262119	357073	104762	145583	37376.8	755709	2.00478e+06	781203	572877	390602	761536	1.29797e+06	859590	928033	771369	54.56	207041	207695	54.88	4.48	2.16	0.0001554	3.81	0.00449411	1.86336	170.871	382.6	6.4	Up
M171T721	751533	1.19813e+06	1.01753e+06	513571	982225	1.4649e+06	1.11256e+06	3.0859e+06	1.71203e+06	2.41256e+06	1.89793e+06	1.94673e+06	2.06209e+06	3.41328e+06	2.46663e+06	2.80699e+06	2.33978e+06	2.23733e+06	24.03	1.26579e+06	1.06504e+06	62.3	1.85	0.89	0.00699301	2.16	0.0487438	1.58045	171.101	720.6	12	Up
M171T78	6.98946e+07	6.3791e+07	6.32765e+07	6.2202e+07	1.6364e+08	7.94075e+07	5.05972e+07	5.22996e+07	3.48066e+07	9.28628e+06	5.84762e+07	1.0275e+08	2.96542e+07	4.34308e+07	4.47134e+07	2.71673e+07	4.37856e+07	3.91187e+07	63.67	7.56385e+07	6.35338e+07	48.54	0.58	-0.79	0.014763	1.83	0.078691	1.23789	171.006	77.7	1.3	Down
M172T101	157298	405946	346174	342859	306364	107297	397814	331479	491979	339304	410526	360236	563949	403070	359772	501673	428814	406798	18.91	299404	337169	36.43	1.43	0.52	0.014763	1.83	0.078691	1.30216	172.018	101.4	1.7	Up
M172T113_1	68851.3	106432	62701.2	105763	54671	72504.2	59629.6	71366.4	48992.6	55087.6	44543.2	60148.8	46671.4	52743.4	48462.5	58695.9	51918.2	50868	10.96	75239.8	70108.9	26.54	0.69	-0.54	0.0018648	2.73	0.0213197	1.66857	172.007	113.1	1.9	Down
M173T347	2324.39	26588.6	13897	107261	13519.5	71041.5	89800.5	12506.8	85959.1	166990	209460	261030	23895.1	140168	105695	190662	147982	153579	50.98	42117.4	20242.8	96.94	3.51	1.81	0.00699301	2.16	0.0487438	1.45966	173.101	346.7	5.8	Up
M173T368	864.277	1384.58	592.772	958.796	1018.92	5932.49	230.322	324.541	20276.8	26782.6	27281.5	2275.75	2247.52	41232.3	40524.5	25122.1	23217.9	25952.4	63.96	1413.34	911.54	131.95	16.43	4.04	0.000621601	3.21	0.0104451	1.83318	172.868	368.2	6.1	Up
M173T420	153916	33560.4	98672.4	58903.7	148086	32209.8	213309	123699	2600.58	24837.3	5038.55	3396.78	6660.3	5954.09	9553.54	2043.46	7510.58	5496.32	98.69	107794	111186	59.54	0.07	-3.84	0.0001554	3.81	0.00449411	2.0292	173.072	419.9	7	Down
M173T471	121624	40170.4	105022	32320.2	109798	51593.7	82919.1	60539	22856.3	14997.1	3902.87	40820.3	49715	92576.6	5372.79	50519.9	35095.1	31838.3	84.79	75498.3	71729.1	45.16	0.46	-1.11	0.0281274	1.55	0.119973	1.32697	173.011	470.8	7.8	Down
M173T536	1.07361e+06	1.61306e+06	1.44796e+06	4.86813e+06	3.02371e+06	410917	1.31584e+06	2.4686e+06	1.14879e+07	1.24595e+07	6.44162e+06	1.76988e+06	4.04486e+06	3.06375e+06	8.0758e+06	7.56144e+06	6.86309e+06	7.00153e+06	55.94	2.02773e+06	1.53051e+06	69.23	3.38	1.76	0.0029526	2.53	0.0288032	1.65341	173.118	536.3	8.9	Up
M173T83	942706	654665	1.8435e+06	669113	674209	430558	2.26661e+06	570493	1.69936e+06	1.89059e+06	860744	2.14364e+06	1.11417e+06	2.0481e+06	1.56056e+06	1.89463e+06	1.65147e+06	1.79498e+06	27.47	1.00648e+06	671661	66.78	1.64	0.71	0.0498834	1.3	0.173853	1.38187	172.941	83.4	1.4	Up
M174T110	1.59889e+06	2.21094e+06	2.07475e+06	2.55362e+06	1.12707e+06	952522	1.20665e+06	1.68838e+06	2.56608e+06	2.82179e+06	3.2411e+06	3.16797e+06	3.53779e+06	3.18487e+06	2.77402e+06	8.68456e+06	3.74727e+06	3.17642e+06	53.87	1.6766e+06	1.64363e+06	33.94	2.24	1.16	0.0001554	3.81	0.00449411	1.76484	174.077	109.9	1.8	Up
M174T122	1.2734e+06	1.50002e+06	1.35672e+06	1.09537e+06	2.00441e+06	1.84845e+06	1.33496e+06	1.17292e+06	2.45705e+06	2.07149e+06	2.88526e+06	2.61374e+06	2.04157e+06	2.516e+06	3.00765e+06	1.7934e+06	2.42327e+06	2.48653e+06	17.56	1.44828e+06	1.34584e+06	22.21	1.67	0.74	0.000621601	3.21	0.0104451	1.86099	174.023	122.4	2	Up
M174T315	2.6605e+06	3.37848e+06	1.59906e+06	3.59839e+06	1.66029e+06	4.80892e+06	1.00854e+06	2.58807e+06	3.54449e+06	7.50153e+06	7.98575e+06	2.65762e+06	5.43317e+06	3.9256e+06	8.86358e+06	6.54595e+06	5.80721e+06	5.98956e+06	39.17	2.66278e+06	2.62428e+06	46.8	2.18	1.12	0.00699301	2.16	0.0487438	1.51966	174.023	315	5.2	Up
M174T387	824485	914722	662623	799507	520614	658086	436693	904455	315421	289527	664003	226080	420887	538452	453464	301086	401115	368154	36.68	715148	731065	24.57	0.56	-0.83	0.00699301	2.16	0.0487438	1.64868	173.995	387.3	6.5	Down
M174T85_1	1.83381e+06	3.69865e+06	1.83418e+06	3.30248e+06	2.62453e+06	547471	2.18668e+06	1.72067e+06	1.41539e+06	340551	2.20464e+06	2.37916e+06	1.42589e+06	359496	346953	464606	1.11709e+06	940001	76.83	2.21856e+06	2.01043e+06	44.65	0.5	-0.99	0.0379176	1.42	0.147066	1.17176	173.989	84.7	1.4	Down
M175T104	1.08357e+07	2.7748e+07	1.80352e+07	2.04162e+07	1.2949e+07	1.45994e+07	2.68793e+07	2.69292e+07	2.97328e+07	1.59762e+07	3.14594e+07	2.73993e+07	3.29546e+07	1.91181e+07	3.18482e+07	2.24883e+07	2.63721e+07	2.8566e+07	24.29	1.9799e+07	1.92257e+07	34.25	1.33	0.41	0.0498834	1.3	0.173853	1.11584	174.956	104.4	1.7	Up
M175T179	1.60116e+07	1.29494e+07	1.54783e+07	1.33684e+07	1.81984e+07	1.96211e+07	1.75362e+07	1.57721e+07	9.45388e+06	3.00411e+06	1.16881e+07	9.29385e+06	1.05573e+07	1.57655e+07	3.88305e+06	1.4973e+07	9.82736e+06	1.00056e+07	46.8	1.61169e+07	1.58918e+07	14.22	0.61	-0.71	0.0029526	2.53	0.0288032	1.38913	174.955	179.1	3	Down
M175T227	572399	560304	564721	865965	539803	495041	706118	1.17356e+06	1.17043e+06	1.55221e+06	1.16419e+06	1.24575e+06	1.68329e+06	1.14114e+06	1.42666e+06	1.47662e+06	1.35754e+06	1.33621e+06	15.11	684739	568560	33.66	1.98	0.99	0.0010878	2.96	0.0151734	2.01619	174.829	226.7	3.8	Up
M175T303	388755	411167	517369	442268	428739	450413	396305	456637	621637	1.20929e+06	535015	612954	626350	924226	1.01682e+06	944599	811361	775288	30.08	436457	435503	9.39	1.86	0.89	0.0001554	3.81	0.00449411	1.86874	175.098	302.6	5	Up
M175T344	428492	455142	349066	470422	300120	368391	645546	475476	615436	763549	1.12366e+06	1.19794e+06	540859	877839	622737	884865	828360	820694	29	436582	441817	24.13	1.9	0.92	0.0010878	2.96	0.0151734	1.85914	174.828	344.4	5.7	Up
M175T375	10742.2	7056.38	4707.54	98721	46707.9	34229.2	21424.3	83067.4	92888.6	120919	126942	140638	128130	103357	171365	118595	125354	123931	18.98	38332	27826.8	92.97	3.27	1.71	0.0003108	3.51	0.00655521	1.71395	175.098	374.7	6.2	Up
M175T387	803030	775633	1.13443e+06	948172	964758	987445	881177	773604	671792	613003	667442	773671	187221	290373	896850	922649	627875	669617	42.24	908531	914675	13.78	0.69	-0.53	0.014763	1.83	0.078691	1.1785	174.988	387.2	6.5	Down
M175T396	646727	669678	582224	792861	428014	856097	505155	589792	564065	263343	667540	499343	626745	448137	329241	375131	471693	473740	30.54	633818	618259	22.29	0.74	-0.43	0.0498834	1.3	0.173853	1.22357	175.098	395.8	6.6	Down
M175T56	7.45582e+06	8.17691e+06	8.29805e+06	8.66119e+06	8.2361e+06	7.96955e+06	8.12138e+06	8.78964e+06	8.45399e+06	9.52075e+06	8.95778e+06	1.10596e+07	9.24307e+06	8.50731e+06	8.2378e+06	8.55687e+06	9.06715e+06	8.75732e+06	10.09	8.21358e+06	8.20651e+06	5.01	1.1	0.14	0.014763	1.83	0.078691	1.29745	174.955	56	0.9	Up
M175T76_2	59595.5	40990	60219.2	2.03378e+06	90862.3	77169.7	43180.1	66325.2	2.61226e+06	2.94175e+06	3.69838e+06	3.18166e+06	1.87416e+06	3.31556e+06	1.69767e+06	4.3936e+06	2.96438e+06	3.0617e+06	30.36	309015	63272.2	225.59	9.59	3.26	0.000621601	3.21	0.0104451	2.07166	175.044	75.7	1.3	Up
M175T833	5.6172e+07	4.41476e+07	4.35569e+07	5.35033e+07	9.03385e+07	1.0661e+08	4.25542e+07	3.14033e+07	8.53207e+07	1.02759e+08	1.44439e+08	3.54584e+07	9.27647e+07	8.82098e+07	1.12613e+08	1.21543e+08	9.78885e+07	9.7762e+07	32.63	5.85357e+07	4.88254e+07	44.63	1.67	0.74	0.0498834	1.3	0.173853	1.27198	174.982	832.8	13.9	Up
M175T88	471677	755895	446985	806832	457066	530660	541982	500498	909891	741194	967563	505263	802941	557558	691754	731309	738434	736252	21.44	563949	515579	24.63	1.31	0.39	0.0498834	1.3	0.173853	1.26072	175.072	88.3	1.5	Up
M176T147	2.94849e+06	2.81484e+06	1.92853e+06	1.64284e+06	2.16059e+06	965376	2.55596e+06	1.46327e+06	747710	185773	774165	1.49489e+06	1.0131e+06	300307	287808	1.94731e+06	843882	760937	73.89	2.05999e+06	2.04456e+06	33.64	0.41	-1.29	0.00699301	2.16	0.0487438	1.51436	176.039	147.3	2.5	Down
M176T303	49133.1	58559.5	241826	82091.2	242984	84916.2	72169.7	74843.6	502839	1.32604e+06	772812	153844	640868	156188	469242	355727	547195	486040	69.71	113315	78467.4	71.07	4.83	2.27	0.0018648	2.73	0.0213197	1.81112	175.942	302.9	5	Up
M177T73	222492	257456	200924	249449	190159	282949	198706	198021	340278	1.49054e+06	505223	896295	332243	236590	380270	284457	558237	360274	77.05	225020	211708	15.24	2.48	1.31	0.0010878	2.96	0.0151734	1.47411	176.926	72.5	1.2	Up
M177T79	5.42901e+08	6.53362e+08	6.87947e+08	6.96183e+08	5.34854e+08	6.07112e+08	4.60961e+08	8.35236e+08	1.01424e+09	9.37473e+08	1.10899e+09	1.14206e+09	1.25577e+09	7.22482e+08	9.49659e+08	1.01415e+09	1.0181e+09	1.01419e+09	15.69	6.2732e+08	6.30237e+08	18.68	1.62	0.7	0.0003108	3.51	0.00655521	1.93573	176.935	78.7	1.3	Up
M179T104	53380.7	34672.6	57699.4	208225	40349.9	46956.5	102872	147545	178481	541135	342376	219648	213795	479206	498864	554378	378485	410791	41.86	86462.6	55540	71.99	4.38	2.13	0.0003108	3.51	0.00655521	1.96532	178.88	103.7	1.7	Up
M179T108	7.05415e+06	6.59885e+06	8.44988e+06	6.08951e+06	9.11602e+06	8.19909e+06	9.04331e+06	6.70706e+06	5.79751e+06	4.02988e+06	5.76411e+06	6.31882e+06	5.58329e+06	6.58793e+06	3.06323e+06	4.17178e+06	5.16457e+06	5.6737e+06	24.25	7.65723e+06	7.62662e+06	15.46	0.67	-0.57	0.000621601	3.21	0.0104451	1.64992	179.021	108.3	1.8	Down
M179T332	537501	711252	783014	723177	438193	405133	666919	599571	394080	179778	392089	543528	382599	460172	202870	451423	375817	393084	33.35	608095	633245	22.67	0.62	-0.69	0.00699301	2.16	0.0487438	1.45787	179.072	332.3	5.5	Down
M179T492	70430.9	51431.4	81698.3	45720.3	89236.8	64493.7	1589.16	77242.9	318633	1.20495e+06	90344.5	99430.5	17179.5	75734.9	301696	511124	327386	200563	119.55	60230.4	67462.3	46.29	5.44	2.44	0.0206682	1.68	0.0984557	1.09942	179.083	491.9	8.2	Up
M179T744	3.90389e+06	2.11557e+06	6.05484e+06	9.29861e+06	9.76531e+06	5.81486e+06	1.26776e+07	4.35569e+06	2.41433e+06	354133	3.27147e+06	4.45707e+06	3.55054e+06	996783	285075	2.45644e+06	2.22323e+06	2.43538e+06	69.47	6.7483e+06	5.93485e+06	52.36	0.33	-1.6	0.00699301	2.16	0.0487438	1.4418	179.18	743.7	12.4	Down
M179T765	37305.9	17688.9	25588.9	3846.94	17006.4	3152.18	16314	16598.1	308954	1.60333e+06	157613	5458.33	84021.8	412854	430973	99693.4	387862	233284	132.93	17187.7	16802.3	64.18	22.57	4.5	0.004662	2.33	0.0380456	1.67022	179.108	764.9	12.7	Up
M179T814	3.30156e+06	2.45368e+06	5.17995e+06	3.92549e+06	3.72375e+06	4.0153e+06	4.77143e+06	6.35578e+06	5.8159e+06	1.14243e+07	1.62039e+07	4.76682e+06	4.82464e+06	8.7789e+06	6.71609e+06	1.15207e+07	8.75641e+06	7.7475e+06	46.17	4.21587e+06	3.97039e+06	28.53	2.08	1.05	0.004662	2.33	0.0380456	1.66542	178.977	814.3	13.6	Up
M180T104	324431	304894	335891	296585	321576	239217	452539	447888	619037	607944	526426	675341	634745	507080	552477	627245	593787	613491	9.87	340378	323003	21.7	1.74	0.8	0.0001554	3.81	0.00449411	2.08865	179.997	104.3	1.7	Up
M180T108	7.04818e+06	7.1871e+06	6.83094e+06	5.62629e+06	6.81039e+06	3.81661e+06	8.90516e+06	6.69358e+06	8.24354e+06	2.69218e+06	5.132e+06	5.69254e+06	4.83705e+06	4.17369e+06	3.52959e+06	3.62425e+06	4.74061e+06	4.50537e+06	36.16	6.61478e+06	6.82067e+06	21.88	0.72	-0.48	0.0379176	1.42	0.147066	1.199	180.014	108.3	1.8	Down
M180T122_1	2.58387e+06	2.24872e+06	2.78199e+06	2.12869e+06	2.53795e+06	283260	3.25628e+06	2.26927e+06	4.13998e+06	1.06912e+07	3.24171e+06	3.28182e+06	3.99947e+06	4.48367e+06	5.27392e+06	5.829e+06	5.11759e+06	4.31183e+06	47.34	2.26125e+06	2.40361e+06	38.74	2.26	1.18	0.0003108	3.51	0.00655521	1.5144	180.034	121.6	2	Up
M180T122_2	9.22086e+07	6.34252e+07	1.06662e+08	6.4225e+07	1.03132e+08	6.09513e+07	1.26514e+08	8.85632e+07	1.41148e+08	1.20867e+08	1.32673e+08	1.86844e+08	1.13798e+08	1.5285e+08	1.0335e+08	1.76939e+08	1.41058e+08	1.3691e+08	21.04	8.82101e+07	90385886	27.03	1.6	0.68	0.0018648	2.73	0.0213197	1.74978	180.067	121.9	2	Up
M180T309	91204.1	183357	122186	207224	100438	137076	66498.4	171771	217693	1.02687e+06	347526	220896	271829	596286	743768	569266	499266	458396	57.85	134969	129631	36.38	3.7	1.89	0.0001554	3.81	0.00449411	1.81736	180.034	309.5	5.2	Up
M180T737	202273	38627.3	45623.8	231103	27501.5	15042.8	146844	178219	376844	514229	225410	217700	468684	82340.8	161136	649927	337034	301127	58.35	110654	96233.7	79.56	3.05	1.61	0.014763	1.83	0.078691	1.53352	180.075	736.9	12.3	Up
M181T122_2	6.66401e+06	3.78321e+06	7.00309e+06	3.62627e+06	4.75031e+06	1.33527e+07	1.14869e+07	5.87641e+06	9.20093e+06	4.91364e+06	1.91652e+07	2.48869e+07	1.48781e+07	1.09929e+07	7.20334e+06	7.92677e+06	1.2396e+07	1.00969e+07	54.81	7.06785e+06	6.27021e+06	50.34	1.75	0.81	0.0498834	1.3	0.173853	1.14677	181.07	122	2	Up
M181T154	1.49372e+06	1.98545e+06	1.46749e+06	1.8839e+06	2.49994e+06	1.3085e+06	1.33545e+06	1.9899e+06	1.58249e+06	9.34762e+06	2.3385e+06	2.40301e+06	1.82174e+06	1.07585e+07	1.01066e+07	7.65001e+06	5.75106e+06	5.02651e+06	70.86	1.74554e+06	1.68881e+06	23.77	3.29	1.72	0.0206682	1.68	0.0984557	1.44145	181.05	153.8	2.6	Up
M181T279	120524	144996	32049.6	183690	93115	154784	102364	40241.6	159093	453212	181085	108145	170268	304614	349693	342106	258527	242849	46.6	108970	111444	49.11	2.37	1.25	0.00699301	2.16	0.0487438	1.44083	181.037	278.8	4.6	Up
M181T303	8914.93	27740.8	9816.77	172923	68476.7	58257	22328.6	29133.8	175636	369594	289322	215846	201548	136462	141380	168040	212229	188592	37.73	49698.9	28437.3	108.94	4.27	2.09	0.0010878	2.96	0.0151734	1.81829	181.037	302.9	5	Up
M181T363	1.37012e+06	2.43281e+06	839440	2.17798e+06	1.73965e+06	919098	572049	576122	547417	568495	979998	957638	383178	389708	445516	747188	627392	557956	38.43	1.32841e+06	1.14461e+06	54.41	0.47	-1.08	0.0206682	1.68	0.0984557	1.39618	181.087	363.1	6.1	Down
M181T368	213894	248007	208024	290707	138751	172550	201041	180989	113282	66549.3	144594	136323	126595	118869	98932.4	123440	116073	121154	20.98	206745	204533	22.61	0.56	-0.83	0.0003108	3.51	0.00655521	1.82123	180.9	368.1	6.1	Down
M182T407	14260.5	13561.7	13532.5	41499.6	16706.2	18170.7	10027.6	20792.2	264742	571847	96208.3	20464.4	199922	25965.8	296757	210528	210804	205225	84.91	18568.9	15483.4	52.94	11.35	3.5	0.0010878	2.96	0.0151734	1.80477	182.119	407.5	6.8	Up
M182T477	316873	218478	383762	285187	407110	448959	437381	493205	472219	572507	416166	521575	414850	508436	648377	551174	513163	515005	15.47	373869	395436	24.84	1.37	0.46	0.00699301	2.16	0.0487438	1.47458	182.01	477.4	8	Up
M182T84	2.09548e+07	2.02856e+07	2.14085e+07	2.39039e+07	2.3068e+07	2.34341e+07	2.27012e+07	2.34856e+07	2.65012e+07	2.38598e+07	2.22135e+07	2.49804e+07	2.55629e+07	2.63212e+07	2.76072e+07	2.40028e+07	2.51311e+07	2.52716e+07	6.9	2.24052e+07	2.28846e+07	5.99	1.12	0.17	0.004662	2.33	0.0380456	1.54994	181.966	84.2	1.4	Up
M182T90	664329	967068	899204	829652	1.24567e+06	1.44202e+06	817568	852010	533735	498844	680474	800760	613916	762698	783569	475023	643627	647195	20.52	964690	875607	26.4	0.67	-0.58	0.0018648	2.73	0.0213197	1.63419	182.075	89.6	1.5	Down
M183T31	101895	86006.5	104782	99756.8	131050	99973.1	82971.4	84046.9	124398	240449	192638	180069	116630	127767	179096	141740	162848	160418	26.22	98810.1	99864.9	15.86	1.65	0.72	0.0010878	2.96	0.0151734	1.81143	182.879	30.6	0.5	Up
M183T336	2.62526e+06	3.12644e+06	2.37257e+06	1.56492e+06	524310	2.6797e+06	2.60053e+06	3.35335e+06	133835	162592	217358	1.49349e+06	245073	1.70288e+06	105008	257374	539701	231215	121.88	2.35589e+06	2.6129e+06	38.66	0.23	-2.13	0.0010878	2.96	0.0151734	1.80169	183.049	335.7	5.6	Down
M183T394	3852.81	11630.4	1896.05	8533.82	126286	84123.2	58796.6	64286.8	78753.2	111172	111751	118247	53310.4	255145	405498	257109	173873	114999	69.31	44925.7	35213.5	101.98	3.87	1.95	0.014763	1.83	0.078691	1.47805	183.049	393.6	6.6	Up
M183T503	274388	308004	283905	1.80307e+06	470812	190994	1.40673e+06	256704	1.91233e+06	7.95178e+06	3.85431e+06	211039	477201	357167	1.63181e+06	3.02762e+06	2427906	1.77207e+06	106.51	624325	295954	99.23	3.89	1.96	0.0498834	1.3	0.173853	1.18594	183.103	503.4	8.4	Up
M183T548	2519.56	12356.7	9689.07	9219.61	4129.73	1312.09	1569.92	25971	14284.2	84805.2	85002.4	53140.1	79041.8	30774.6	49484.2	41094.3	54703.3	51312.1	48.06	8345.96	6674.67	98.85	6.55	2.71	0.0003108	3.51	0.00655521	1.8989	183.139	547.6	9.1	Up
M183T55_2	201640	502566	348178	50029.4	230886	412572	426855	197276	133421	195435	184245	119611	75534.1	223191	131714	104145	145912	132568	34.4	296250	289532	50.95	0.49	-1.02	0.0206682	1.68	0.0984557	1.14246	182.933	55.2	0.9	Down
M183T781	8.83134e+08	9.20169e+08	4.32229e+08	6.85185e+08	5.45622e+08	7.73915e+08	5.55767e+08	9.407e+08	1.34563e+09	1.07043e+09	8.97874e+08	6.56582e+08	1.15855e+09	1.06333e+09	1.29784e+09	5.51253e+08	1.00519e+09	1.06688e+09	28.43	7.1709e+08	7.2955e+08	26.86	1.4	0.49	0.0498834	1.3	0.173853	1.10626	182.988	781	13	Up
M184T122_1	354232	561274	351353	1.10759e+06	355027	187599	795716	246554	251234	1.3565e+06	359158	458822	1.33621e+06	2.4665e+06	2.03939e+06	3.93129e+06	1.52489e+06	1.34635e+06	82.67	494918	354630	63.27	3.08	1.62	0.0379176	1.42	0.147066	1.19484	184.008	121.6	2	Up
M184T122_2	2.81766e+06	1.95736e+06	1.93118e+06	2.57187e+06	2.83112e+06	3.10847e+06	2.77854e+06	2.62443e+06	5.97395e+06	5.84496e+06	8.23049e+06	2.60434e+06	4.78819e+06	2.71442e+06	7.84451e+06	3.6596e+06	5.20756e+06	5.31658e+06	41.47	2.57758e+06	2.70148e+06	16.39	2.02	1.01	0.014763	1.83	0.078691	1.67131	184.061	122.2	2	Up
M184T373	7.24512e+06	7.20911e+06	9.75235e+06	3.09003e+06	1.21337e+07	1.06686e+07	9.00761e+06	7.33812e+06	1.65472e+06	4.36873e+06	7.29662e+06	2.34224e+06	1.58172e+06	7.90144e+06	2.21174e+06	4.59307e+06	3.99379e+06	3.35549e+06	62.68	8.30558e+06	8.17286e+06	33.22	0.48	-1.06	0.014763	1.83	0.078691	1.48121	184.098	373.1	6.2	Down
M184T374	208482	160080	152435	210069	163459	21807.4	39750.4	169075	181320	271556	286348	196801	202000	197021	187044	292205	226787	199511	21	140645	161769	50.68	1.61	0.69	0.0206682	1.68	0.0984557	1.25409	184.007	374.2	6.2	Up
M184T407	49700.2	82566.2	35917.3	41643.1	14461.5	23942.4	47213.6	26859.7	55733.1	83162.6	119654	142102	64387.5	47785.8	36011.5	92044.1	80110.1	73775	45.72	40288	38780.2	51.89	1.99	0.99	0.0104118	1.98	0.0628046	1.42615	184.044	407	6.8	Up
M184T465	24301.5	20811.4	25955.9	19959.1	24696.8	6760.59	26508.2	22956.9	179832	59870.4	251464	251601	113305	213728	185442	44697.8	162493	182637	49.96	21493.8	23629.2	29.7	7.56	2.92	0.0001554	3.81	0.00449411	2.07161	184.106	464.9	7.7	Up
M185T107_4	415517	366734	407479	345301	409939	362223	441051	307829	306656	216097	303326	301053	282922	275649	305601	272181	282936	291987	10.73	382009	387107	11.5	0.74	-0.43	0.0001554	3.81	0.00449411	1.83511	185.078	107.4	1.8	Down
M185T541	736252	739202	762394	954519	1.56378e+06	1.37152e+06	1.39257e+06	685197	2.48338e+06	2.10618e+06	2.56362e+06	3.58064e+06	2.88728e+06	1.82454e+06	2.75491e+06	3.06172e+06	2.65778e+06	2.65926e+06	20.68	1.02568e+06	858457	34.96	2.59	1.37	0.0001554	3.81	0.00449411	2.03681	185.119	541.4	9	Up
M185T72	6.10701e+07	5.12132e+07	6.65297e+07	6.17046e+07	6.58787e+07	6.42199e+07	7.90621e+07	6.70866e+07	7.74256e+07	7.41813e+07	7.12758e+07	7.38421e+07	7.98923e+07	7.42804e+07	7.30442e+07	8.40516e+07	7.59992e+07	7.42308e+07	5.54	6.45956e+07	6.50493e+07	12	1.18	0.23	0.004662	2.33	0.0380456	1.65644	184.985	72.5	1.2	Up
M185T88	5.64929e+06	6.22357e+06	1.27193e+07	5.14796e+06	4.98275e+06	5.29286e+06	7.96208e+06	1.00998e+07	2.77087e+06	3.50281e+06	3.92016e+06	1.24646e+07	3.45586e+06	4.34626e+06	754548	3.26417e+06	4.3099e+06	3.47933e+06	80.44	7.25971e+06	5.93643e+06	38.8	0.59	-0.75	0.00699301	2.16	0.0487438	1.22315	185.022	87.6	1.5	Down
M185T95	960290	1.03653e+06	594142	1.1064e+06	1.16331e+06	908247	973669	974165	1.04096e+06	1.18209e+06	1.64104e+06	1.91543e+06	1.57986e+06	1.31539e+06	1.41808e+06	1.45232e+06	1.44315e+06	1.4352e+06	19.03	964595	973917	17.76	1.5	0.58	0.000621601	3.21	0.0104451	1.70978	185.093	95.4	1.6	Up
M186T105	90579.3	84814.6	157457	139201	104778	94312.7	118467	92051.6	155015	136594	135351	135139	176411	131269	178160	174372	152789	145804	13.58	110208	99545.2	23.72	1.39	0.47	0.014763	1.83	0.078691	1.68695	185.845	105	1.8	Up
M186T118	974335	511954	1.07688e+06	1.05235e+06	1.05835e+06	1.06166e+06	1.07597e+06	1.04679e+06	1.09494e+06	971906	1.24592e+06	1.12808e+06	990673	1.1232e+06	1.24165e+06	1.57125e+06	1.17095e+06	1.12564e+06	16.23	982287	1.05535e+06	19.63	1.19	0.25	0.0498834	1.3	0.173853	1.08471	186.077	117.9	2	Up
M186T128	37105.6	66608.1	63918.2	52994	44997.8	47168.8	17451.9	49627.2	10440.7	38389.5	40100	42905.2	28683.8	47569.8	14938.6	9034.44	29007.7	33536.6	53.57	47484	48398	32.69	0.61	-0.71	0.0281274	1.55	0.119973	1.18474	185.947	127.9	2.1	Down
M186T303	254665	219959	275606	301026	518652	367298	151978	229104	170207	135185	189906	173990	192518	228902	132448	258391	185193	181948	23.25	289786	265135	38.58	0.64	-0.65	0.0206682	1.68	0.0984557	1.38817	185.947	302.8	5	Down
M186T363	265811	367747	308061	337508	186648	154553	591410	278414	151436	204745	185628	155177	172877	184218	93171.4	369626	189610	178547	42.24	311269	293237	43.03	0.61	-0.72	0.0498834	1.3	0.173853	1.21011	186.056	363.2	6.1	Down
M186T374_1	502627	478373	264953	471725	199327	218293	399997	424986	373254	4424.4	259734	191187	359251	7262.76	52631.9	9185.07	157116	121909	101.45	370035	412492	33.38	0.42	-1.24	0.0104118	1.98	0.0628046	1.31391	185.947	373.8	6.2	Down
M186T374_2	1.23362e+06	1.1227e+06	786270	1.42308e+06	709773	399216	463973	1.13185e+06	1.95829e+06	1.52124e+06	1.95473e+06	1.06645e+06	1.23477e+06	955122	1.12657e+06	1.64862e+06	1.43322e+06	1.378e+06	27.64	908810	954485	41.12	1.58	0.66	0.0379176	1.42	0.147066	1.39651	186.113	374.4	6.2	Up
M186T463	420911	565352	430014	533665	500133	433164	430343	531876	435922	342179	415498	532394	429178	381532	323228	361424	402669	398515	16.51	480682	466648	12.16	0.84	-0.26	0.0281274	1.55	0.119973	1.3285	186.114	463.1	7.7	Down
M186T547	71239.3	351925	147559	167678	242375	108544	140766	57958.4	62829.4	290189	430844	362879	400211	399851	407050	386523	342547	393187	35.22	161006	144163	59.91	2.13	1.09	0.0104118	1.98	0.0628046	1.28898	186.121	547.3	9.1	Up
M186T715	242482	387326	388193	213346	605606	189441	400063	260597	707113	561714	757476	629557	829215	816632	559843	702701	695531	704907	15.1	335882	323961	41.05	2.07	1.05	0.000621601	3.21	0.0104451	1.91667	186.113	714.7	11.9	Up
M187T113	566392	493411	311100	488343	1.08895e+06	372321	357579	406745	689037	1.25752e+06	1.12609e+06	1.0573e+06	824519	966584	590384	593911	888167	895552	28.44	510606	447544	48.63	1.74	0.8	0.004662	2.33	0.0380456	1.56179	187.025	113.4	1.9	Up
M187T118	190823	792373	157395	163542	165326	150515	1.27658e+06	831917	1.3835e+06	2.5743e+06	2.0343e+06	2.32932e+06	1.40353e+06	184691	808030	614914	1.41657e+06	1.39352e+06	60.18	466058	178074	94.22	3.04	1.6	0.014763	1.83	0.078691	1.41964	187.109	117.6	2	Up
M187T256	2.21819e+07	2.05255e+07	2.32281e+07	2.34154e+07	1.95114e+07	1.12541e+07	2.05483e+07	2.09309e+07	1.38536e+07	9.94679e+06	1.49151e+07	2.84767e+07	8.25213e+06	7.58871e+06	1.91367e+07	1.84026e+07	1.50715e+07	1.43844e+07	46.08	2.01994e+07	2.07396e+07	19.15	0.75	-0.42	0.0379176	1.42	0.147066	1.00295	187.097	256.3	4.3	Down
M187T303_2	65817	96818	198389	70279.8	168389	242114	65840.8	59867.9	340460	370513	121052	762601	426097	1.34277e+06	479922	426238	533707	426167	69.65	120939	83548.9	59.2	4.41	2.14	0.0010878	2.96	0.0151734	1.71379	187.061	303.1	5.1	Up
M187T35	66515.6	62196.2	62084.9	73842.3	49364.7	43072.7	71321	68123.7	87529.2	85606.3	89327.3	85006.7	81784.5	65170.3	63334.7	88122.7	80735.2	85306.5	12.93	62065.1	64355.9	17.26	1.3	0.38	0.0104118	1.98	0.0628046	1.61006	186.866	34.8	0.6	Up
M187T406	6556.82	681.235	3500.86	23038.2	35842.2	2720.61	42601.1	8292.93	79620.4	32947.5	98361.3	81617.4	79161.9	47689.7	8364.35	36915.4	58084.7	63425.8	53.44	15404.2	7424.88	105.93	3.77	1.91	0.004662	2.33	0.0380456	1.55777	187.007	406	6.8	Up
M187T516	274188	394124	101695	829804	286884	260226	340358	603306	1.03697e+06	901101	1.14013e+06	1.15724e+06	953378	782892	814070	948807	966824	951093	14.27	386323	313621	59.13	2.5	1.32	0.000621601	3.21	0.0104451	1.81692	187.134	515.8	8.6	Up
M187T94	1.94454e+06	2.26996e+06	2.43386e+06	2.45385e+06	1.95973e+06	967829	2.26193e+06	2.31359e+06	2.5748e+06	2.39191e+06	3.48195e+06	2.41225e+06	3.04826e+06	2.33872e+06	2.53918e+06	3.88444e+06	2.83394e+06	2.55699e+06	20.41	2.07566e+06	2.26595e+06	23.45	1.37	0.45	0.004662	2.33	0.0380456	1.43325	187.072	93.9	1.6	Up
M188T116	142789	74880.4	137063	66779.6	155859	109303	105301	79245.8	143691	149060	152556	150684	127216	142070	132270	152628	143772	146375	6.65	108902	107302	30.99	1.32	0.4	0.0498834	1.3	0.173853	1.40227	188.039	116.4	1.9	Up
M188T118	86122.2	83943.2	86912.6	108432	78911.3	65783.8	85052	68025.3	91370.2	69153	101351	126446	112435	122981	120548	122126	108301	116491	18.37	82897.8	84497.6	15.89	1.31	0.39	0.0104118	1.98	0.0628046	1.44178	188.112	117.6	2	Up
M188T157	756816	624881	932579	887998	1.37103e+06	156625	822305	932805	2.93747e+06	2.99969e+06	2.80715e+06	1.93789e+06	2.69513e+06	2.38614e+06	2.43765e+06	2.04493e+06	2.53075e+06	2.56639e+06	15.71	810630	855151	42.1	3.12	1.64	0.0001554	3.81	0.00449411	1.96979	187.942	156.6	2.6	Up
M188T303	1.63188e+06	1.7232e+06	1.23459e+06	6.60536e+06	1.56942e+06	3.70455e+06	3.83065e+06	4.02361e+06	7.23216e+06	7.68984e+06	2.80307e+06	6.18412e+06	3.91263e+06	4.34198e+06	8.64392e+06	1.08915e+07	6.4624e+06	6.70814e+06	41.74	3.04041e+06	2.71388e+06	60.75	2.13	1.09	0.0104118	1.98	0.0628046	1.46147	187.942	303.1	5.1	Up
M188T352	1.15632e+06	994533	1.46992e+06	1.38551e+06	937202	1.07914e+06	1.14389e+06	1.43714e+06	32800.4	96712.6	407816	4.10237e+06	78146.9	944450	120306	97985.1	735073	109146	189.66	1.20046e+06	1.15011e+06	17.08	0.61	-0.71	0.014763	1.83	0.078691	1.45639	188.035	351.8	5.9	Down
M188T55	131868	154505	150709	180988	108297	135435	155244	196841	183208	190977	261099	192832	244354	174384	171765	165115	197967	187093	17.86	151736	152607	18.4	1.3	0.38	0.014763	1.83	0.078691	1.50679	187.861	55	0.9	Up
M188T699	6.51329e+06	8.57509e+07	6.37457e+06	8.93461e+06	1.8321e+06	5.93333e+06	2.79443e+06	2.91034e+06	1.12388e+06	175364	2.55795e+06	8.33456e+06	524887	3.2263e+06	547441	801597	2.1615e+06	962741	125.55	1.51304e+07	6.15395e+06	189.25	0.14	-2.81	0.0206682	1.68	0.0984557	1.44559	187.861	698.5	11.6	Down
M188T732	3.29562e+06	1.22602e+06	2.82424e+06	1.01109e+06	854303	2.20704e+06	1.82841e+06	2.92415e+06	3.4924e+06	4.50265e+06	3.89435e+06	2.38862e+06	3.71992e+06	3.6737e+06	2.33887e+06	3.0048e+06	3.37692e+06	3.58305e+06	22.24	2.02136e+06	2.01772e+06	46.45	1.67	0.74	0.00699301	2.16	0.0487438	1.46441	187.942	732	12.2	Up
M188T795	5.60572e+06	1.54092e+06	5.5112e+06	4.29775e+06	5.63838e+06	2.75838e+06	5.87963e+06	3.85596e+06	6.21961e+06	5.69288e+06	5.80845e+06	1.40455e+07	6.80366e+06	6.33273e+06	3.14659e+06	1.12109e+07	7.40754e+06	6.27617e+06	47.07	4.38599e+06	4.90448e+06	36.14	1.69	0.76	0.0104118	1.98	0.0628046	1.26008	187.942	795.1	13.3	Up
M188T96	723966	1.02277e+06	797236	892842	729100	813846	875073	910572	4.65222e+06	3.58956e+06	4.9904e+06	3.7529e+06	4.21762e+06	3.83086e+06	4.80069e+06	3.43049e+06	4.15809e+06	4.02424e+06	14.31	845675	844460	11.86	4.92	2.3	0.0001554	3.81	0.00449411	2.29251	188.057	96.3	1.6	Up
M189T257	72815.1	101032	100691	116924	108300	88438.4	90291.5	139592	66461	64609.2	96396	93670.6	80780	69584.4	72495.7	61437.3	75679.3	71040	17.56	102261	100862	19.73	0.74	-0.43	0.00699301	2.16	0.0487438	1.47654	189.102	257	4.3	Down
M189T284	1.24319e+06	2.24763e+06	1.69051e+06	1.43574e+06	584511	1.48935e+06	1.38015e+06	1.98324e+06	1.11059e+06	68277	1.59498e+06	973463	1.42084e+06	635930	80563.2	88686.2	746666	804697	83.29	1.50679e+06	1.46255e+06	33.19	0.5	-1.01	0.0281274	1.55	0.119973	1.26153	188.942	284	4.7	Down
M189T301_2	572248	590026	587336	723441	526837	435660	693195	869073	92482.3	131568	83797.2	76610	98121.5	111881	77599.7	77123.8	93647.9	88139.7	21.01	624727	588681	21.38	0.15	-2.74	0.0001554	3.81	0.00449411	2.26393	189.096	300.6	5	Down
M189T393	634110	608590	438191	662986	731777	522418	657493	512364	523475	257547	258702	319289	381323	511880	466184	284862	375408	350306	29.81	595991	621350	16.25	0.63	-0.67	0.0029526	2.53	0.0288032	1.72824	189.042	393.4	6.6	Down
M189T429	2949.9	9960.52	24466.9	27686.6	184221	4414.55	7418.63	2053.3	7.87984e+06	2.06246e+07	1.13328e+07	9715.37	4.11922e+06	2.09053e+06	1.12681e+07	7.26699e+06	8.07398e+06	7.57342e+06	80.47	32896.4	8689.58	188.2	245.44	7.94	0.0018648	2.73	0.0213197	1.94454	188.952	428.7	7.1	Up
M189T546	3.16076e+06	2.6917e+06	3.01287e+06	3.06174e+06	1.54786e+06	1.62528e+06	2.99761e+06	4.57297e+06	859587	491364	1.65184e+06	2.11125e+06	812317	278627	493352	732436	928846	772376	67.87	2.83385e+06	3.00524e+06	33.68	0.33	-1.61	0.0018648	2.73	0.0213197	1.75217	188.952	545.8	9.1	Down
M189T83	152096	126647	158625	117062	148294	109704	146815	116454	195772	530087	205598	250994	194834	275386	248887	223776	265667	236332	41.67	134462	136731	14.17	1.98	0.98	0.0001554	3.81	0.00449411	1.86102	189.005	83.5	1.4	Up
M189T88	270658	655947	588845	1.39661e+06	459976	1.26951e+06	530808	620839	733438	839862	1.40627e+06	795138	1.80538e+06	1.30443e+06	1.43741e+06	717886	1.12998e+06	1.07215e+06	36.35	724148	604842	54.64	1.56	0.64	0.014763	1.83	0.078691	1.14583	189.088	88.4	1.5	Up
M189T97	1.32003e+06	1.19801e+06	1.3797e+06	1.30618e+06	1.17531e+06	961873	1.60718e+06	1.31825e+06	1.26685e+06	519102	1.22636e+06	1.11098e+06	1.10357e+06	980751	806361	956729	996338	1.04216e+06	24.48	1.28332e+06	1.31222e+06	14.41	0.78	-0.37	0.014763	1.83	0.078691	1.17524	189.057	96.6	1.6	Down
M190T106	2.34247e+06	6.87895e+06	1.01468e+07	6.34391e+06	1.50706e+07	1.39545e+07	6.7953e+06	6.71071e+06	4.44967e+06	2.74781e+06	6.10668e+06	4.4004e+06	1.16822e+06	7.11716e+06	1.64858e+06	3.43169e+06	3.88377e+06	3.91604e+06	53.17	8.5304e+06	6.83713e+06	49.92	0.46	-1.14	0.0206682	1.68	0.0984557	1.38177	190.018	106.1	1.8	Down
M190T114	1.75008e+06	2.02369e+06	1.39104e+06	3.11549e+06	1.37879e+06	1.92288e+06	1.53113e+06	3.1249e+06	3.03147e+06	4.51026e+06	4.10811e+06	3.85131e+06	4.43229e+06	3.47954e+06	4.25587e+06	3.67954e+06	3.91855e+06	3.97971e+06	12.96	2.02975e+06	1.83648e+06	35.08	1.93	0.95	0.000621601	3.21	0.0104451	1.92618	190.072	114.2	1.9	Up
M190T122	7.46743e+06	8.3541e+06	7.84148e+06	7.66258e+06	5.28986e+06	5.74169e+06	6.79348e+06	6.70207e+06	8.94395e+06	7.23988e+06	7.91668e+06	8.34205e+06	9.42761e+06	8.41822e+06	6.07172e+06	9.6318e+06	8.24899e+06	8.38014e+06	14.26	6.98159e+06	7.13045e+06	15.15	1.18	0.24	0.0379176	1.42	0.147066	1.1764	190.018	121.7	2	Up
M190T254	2.17612e+06	3.32457e+06	2.13092e+06	7.007e+06	1.83646e+06	1.57838e+06	4.33482e+06	5.79579e+06	5.6523e+06	6.94738e+06	7.5322e+06	7.61565e+06	7.03221e+06	5.6543e+06	5.76367e+06	6.0158e+06	6.52669e+06	6.48159e+06	12.95	3.52301e+06	2.75034e+06	57.15	1.85	0.89	0.0104118	1.98	0.0628046	1.6824	190.054	254.3	4.2	Up
M190T429	2.0504e+06	508609	581065	17462.4	857171	952147	758580	298131	382321	65402.3	8406.85	61711.2	318268	532167	51769.6	50762	183851	63556.8	107.55	752946	669822	80.49	0.24	-2.03	0.0281274	1.55	0.119973	1.26422	189.955	428.7	7.1	Down
M190T448	554467	845383	708244	1.04785e+06	569677	380262	575133	462081	489836	61613.4	331847	633602	452187	60769.2	66566	35793.3	266527	199207	89.79	642887	572405	33.71	0.41	-1.27	0.0104118	1.98	0.0628046	1.47077	190.087	447.6	7.5	Down
M190T478	20301.4	24445.3	20622.8	27470.2	27068.5	17585	12918.5	18468.4	14184.6	7032.74	14936.5	22413	17134	925.372	3265.11	10097.5	11248.6	12141	64.71	21110	20462.1	23.65	0.53	-0.91	0.0104118	1.98	0.0628046	1.23077	190.036	478.1	8	Down
M190T658	1.19978e+06	841293	1.42435e+06	1.72707e+06	4.20973e+06	1.04406e+06	1.35555e+06	5.28872e+06	7.26309e+06	1.06552e+07	8.99043e+06	2.20826e+06	1.9374e+06	1.02699e+07	7.36586e+06	1.35947e+07	7.78559e+06	8.17814e+06	52.14	2.13632e+06	1.38995e+06	77.66	3.64	1.87	0.0018648	2.73	0.0213197	1.6895	189.858	658	11	Up
M190T682	2.06472e+06	3.05315e+06	4.78006e+06	3.52926e+06	1.78777e+06	1.52272e+06	1.8041e+06	2.26997e+06	4.77355e+06	1.60739e+07	6.91739e+06	4.50642e+06	5.11096e+06	3.636e+06	3.43914e+06	1.33636e+07	7.22761e+06	4.94226e+06	66.39	2.60147e+06	2.16734e+06	42.78	2.78	1.47	0.0029526	2.53	0.0288032	1.67512	189.858	682.2	11.4	Up
M190T698	1.25725e+07	6.08935e+07	5.18565e+06	7.23453e+06	1.24917e+06	4.73193e+06	5.97813e+06	2.92113e+06	764862	119366	1.74599e+06	7.70933e+06	357649	2.19567e+06	372951	545666	1.72643e+06	655264	146.24	1.25958e+07	5.58189e+06	157.2	0.14	-2.87	0.0104118	1.98	0.0628046	1.5792	189.858	698.4	11.6	Down
M191T121	370492	656930	489791	799085	332174	262733	675981	706912	806368	834708	897548	629345	791703	632837	765781	818538	772103	799035	12.31	536762	573360	37.15	1.44	0.52	0.0206682	1.68	0.0984557	1.46214	191.02	120.7	2	Up
M191T255	551358	482170	623445	501675	461797	326173	590987	617865	1.09988e+06	1.35557e+06	745064	544524	542091	861611	729686	1.10916e+06	873448	803337	33.37	519434	526517	19.12	1.68	0.75	0.0104118	1.98	0.0628046	1.62199	191.058	254.8	4.2	Up
M191T360	221519	434606	263194	355650	239594	395475	271562	236858	159748	226298	222097	231680	249660	218711	237203	230617	222002	228457	12.12	302307	267378	26.89	0.73	-0.45	0.014763	1.83	0.078691	1.46423	190.982	359.5	6	Down
M191T374	276919	281816	522688	269598	293719	285809	500603	384312	789062	409471	878402	490796	529417	447121	300096	299152	517940	468959	41.05	351933	289764	29.88	1.47	0.56	0.0379176	1.42	0.147066	1.1839	191.02	374.1	6.2	Up
M191T766	4.84501e+06	3.80563e+06	3.58455e+06	2.74004e+06	5.52797e+06	2.94341e+06	3.02842e+06	4.23661e+06	2.44203e+06	2.46678e+06	4.12733e+06	1.09696e+06	1.10869e+06	4.34261e+06	2.88505e+06	2.92366e+06	2.67414e+06	2.67592e+06	44.78	3.83896e+06	3.69509e+06	25.59	0.7	-0.52	0.0498834	1.3	0.173853	1.12316	191.108	765.6	12.8	Down
M191T79	2.15874e+06	1.12856e+06	1.78311e+06	1.49176e+06	3.08936e+06	1.452e+06	3.89773e+06	3.27523e+06	4.17366e+06	4.29007e+06	4.66144e+06	4.27612e+06	4.11448e+06	3.38232e+06	4.06207e+06	3.77592e+06	4.09201e+06	4.14407e+06	9.28	2.28456e+06	1.97092e+06	44.26	1.79	0.84	0.000621601	3.21	0.0104451	1.79628	190.952	78.8	1.3	Up
M192T361	1.16919e+06	4.6365e+06	7.78177e+06	982670	1.2376e+06	5.08316e+06	5.82986e+06	6.44406e+06	550765	350870	887026	1.41491e+06	3.78482e+06	4.03881e+06	218803	827216	1.50915e+06	857121	101.31	4.1456e+06	4.85983e+06	64.33	0.36	-1.46	0.014763	1.83	0.078691	1.31053	192.066	361.4	6	Down
M192T373	1.13868e+07	7.48033e+06	9.60756e+06	9.39961e+06	8.46149e+06	6.291e+06	7.40274e+06	6.93087e+06	1.07618e+07	8.80308e+06	1.13816e+07	9.73856e+06	1.01058e+07	8.78296e+06	9.98478e+06	1.30735e+07	1.0329e+07	1.00453e+07	13.72	8.37005e+06	7.97091e+06	20.1	1.23	0.3	0.0281274	1.55	0.119973	1.42101	192.067	372.5	6.2	Up
M193T372	811569	758880	712703	802523	1.55598e+06	891742	1.27566e+06	742068	1.67535e+06	1.12576e+06	2.12078e+06	1.73367e+06	1.62237e+06	868993	1.2515e+06	1.03351e+06	1.42899e+06	1.43694e+06	29.72	943891	807046	32.37	1.51	0.6	0.014763	1.83	0.078691	1.43415	193.07	372.5	6.2	Up
M193T55	2.02601e+06	1.67958e+06	1.71626e+06	2.16744e+06	1.93923e+06	1.69782e+06	1.79941e+06	1.8002e+06	1.95424e+06	4.42195e+06	3.59677e+06	2.30664e+06	1.97344e+06	5.16722e+06	4.63673e+06	4.95089e+06	3.62598e+06	4.00936e+06	37.66	1853244	1.7998e+06	9.45	1.96	0.97	0.0018648	2.73	0.0213197	1.69886	192.929	54.9	0.9	Up
M193T723	676068	476565	426236	591326	473373	426917	466919	555500	377686	165325	330001	444022	215417	269009	176786	217359	274451	243184	36.62	511613	474969	17.24	0.54	-0.9	0.000621601	3.21	0.0104451	1.80522	193.124	722.5	12	Down
M193T754	620233	628494	589263	1.1298e+06	1.70422e+06	355539	574488	226862	1.12642e+06	7.8502e+06	3.65564e+06	1.29426e+06	1.11445e+06	856522	4.59442e+06	2.29125e+06	2.8479e+06	1.79276e+06	85.38	728613	604748	64.97	3.91	1.97	0.00699301	2.16	0.0487438	1.60774	193.087	754.3	12.6	Up
M193T791	1.08218e+06	1.30188e+06	524518	1.77195e+06	902425	673233	890865	1.08657e+06	183399	144235	810317	614777	194845	391587	142351	139325	327604	189122	78.37	1.0292e+06	992304	37.61	0.32	-1.65	0.0010878	2.96	0.0151734	1.7871	193.087	791	13.2	Down
M194T120	6.03685e+07	9.10904e+07	7.41945e+07	1.0774e+08	5.61582e+07	1.09455e+08	1.51352e+08	8.84997e+07	8.98456e+07	1.60832e+08	1.31117e+08	1.90389e+08	9.19683e+07	1.22093e+08	1.54434e+08	1.05647e+08	130790737	1.26605e+08	27.27	9.23574e+07	8.97951e+07	33.47	1.42	0.5	0.0379176	1.42	0.147066	1.24175	194.013	120.5	2	Up
M194T532	19151.8	71193.2	21254.3	44432.2	34042.1	33478.8	18790.3	22183.1	42816.4	136497	62631.8	33932	37556.6	28485.8	80267.7	69582.1	61471.1	52724.1	57.73	33065.7	27831	54.09	1.86	0.89	0.0498834	1.3	0.173853	1.21426	194.103	531.6	8.9	Up
M195T528	167811	102576	159040	187907	120967	115282	1.14622e+06	896871	313874	6.45344e+06	321485	134345	1.53313e+06	4.10233e+06	2.71516e+06	2.54609e+06	2.26498e+06	2.03961e+06	97.1	362084	163426	114.19	6.26	2.65	0.014763	1.83	0.078691	1.38834	195.102	527.8	8.8	Up
M195T760_1	1.43504e+06	1.9123e+06	2.14093e+06	1.69519e+06	1.12364e+06	488157	2.66943e+06	2.98345e+06	3.52063e+06	1.36274e+06	2.40663e+06	3.24824e+06	3.38022e+06	3.22279e+06	2.52199e+06	2.99936e+06	2.83282e+06	3.11108e+06	25.19	1.80602e+06	1.80374e+06	44.92	1.57	0.65	0.0206682	1.68	0.0984557	1.30481	194.989	759.5	12.7	Up
M195T760_2	1.24976e+06	1.77046e+06	1.39357e+06	1.49102e+06	5.55832e+06	2.92987e+06	1.56511e+06	1.02227e+06	5.41184e+06	9.86226e+06	5.75485e+06	3.19426e+06	6.27277e+06	6.25266e+06	3.38317e+06	3.02145e+06	5.39416e+06	5.58335e+06	42.11	2.12255e+06	1.52807e+06	70.77	2.54	1.35	0.0018648	2.73	0.0213197	1.67587	195.139	760	12.7	Up
M195T79	2.4331e+09	1.62533e+09	2.51402e+09	1.81859e+09	2.06311e+09	1.63377e+09	1.17721e+09	1.48722e+09	1.18588e+09	2.6339e+08	1.44771e+09	6.85939e+08	9.92583e+08	1.52345e+09	6.3959e+08	4.42756e+08	8.97663e+08	8.39261e+08	51.69	1.84404e+09	1.72618e+09	25.17	0.49	-1.04	0.0018648	2.73	0.0213197	1.58654	194.946	78.7	1.3	Down
M196T122	997071	1.08561e+06	1.15225e+06	2.18587e+06	2.27288e+06	2.31252e+06	1.44837e+06	989130	3.28838e+06	2.98064e+06	7.51105e+06	4.61808e+06	3.45546e+06	1.58488e+06	5.75461e+06	1.37171e+06	3.8206e+06	3.37192e+06	54.29	1.55546e+06	1.30031e+06	38.52	2.46	1.3	0.00699301	2.16	0.0487438	1.54818	196.045	121.7	2	Up
M196T137	167287	212255	164033	460392	290811	302954	191049	269260	472033	591130	565931	260112	579559	257143	476312	516652	464859	496482	29	257255	240758	38.26	1.81	0.85	0.0104118	1.98	0.0628046	1.57457	195.811	137.3	2.3	Up
M196T151	45635.7	7946.97	17358.1	6906.81	142005	27668.7	631801	73627.4	982512	906645	1.31319e+06	961034	888890	661962	736210	779876	903790	897767	22.1	119119	36652.2	177.94	7.59	2.92	0.0001554	3.81	0.00449411	1.97673	196.012	150.6	2.5	Up
M196T282	374227	320611	313413	334806	349733	290605	575231	369962	487943	413723	396643	461902	479956	421797	461511	564481	460994	461706	11.51	366073	342269	24.35	1.26	0.33	0.0104118	1.98	0.0628046	1.49544	196.073	281.6	4.7	Up
M196T387_1	338439	86024.6	351746	94492.8	340055	317272	279801	308575	389709	391133	484910	401220	487326	475035	538232	331472	437380	438128	15.76	264551	312923	41.53	1.65	0.73	0.0010878	2.96	0.0151734	1.43429	196.011	386.6	6.4	Up
M196T528	2016.75	12009.6	18829.5	19761.7	3273.59	224.913	13366.1	72415.8	97613.9	108098	174925	52109	143162	195069	251718	159048	147718	151105	42.17	17737.2	12687.9	131.53	8.33	3.06	0.0003108	3.51	0.00655521	1.85612	196.106	527.9	8.8	Up
M196T659	3.27985e+06	1.23382e+07	2.3483e+06	1.00197e+07	3.48314e+06	1.89224e+06	547608	2.22897e+06	375419	717634	4.49959e+06	730877	374625	77888.2	2.80323e+06	410629	1.24874e+06	564131	125.29	4.51724e+06	2.81408e+06	94.16	0.28	-1.85	0.0379176	1.42	0.147066	1.34464	195.811	659	11	Down
M196T760	149997	212467	159328	178916	375268	238466	187726	122022	647458	1.04291e+06	788628	430876	736775	726113	731423	573817	709750	728768	24.91	203024	183321	38.65	3.5	1.81	0.0001554	3.81	0.00449411	2.0968	196.142	760	12.7	Up
M197T31	278491	161506	373633	269166	265850	362700	249899	258914	102951	111292	164081	740561	97979	266282	94583.7	126770	213063	119031	103.54	277520	267508	24.08	0.77	-0.38	0.0498834	1.3	0.173853	1.08349	196.895	31.1	0.5	Down
M197T563	1.26173e+06	627776	656495	639186	677041	490786	692236	839765	1.65081e+06	655103	954239	982349	1.40921e+06	1.3886e+06	861401	852025	1.09422e+06	968294	31.53	735627	666768	31.68	1.49	0.57	0.014763	1.83	0.078691	1.3671	196.984	562.6	9.4	Up
M197T836	3.89406e+07	1.12176e+07	1.41259e+07	3.49627e+07	3.46018e+07	2.16073e+07	1.99431e+07	4.6631e+07	3.94051e+07	5.3646e+07	1.90899e+07	7.56956e+07	3.22061e+07	5.46418e+07	6.42319e+07	7.16536e+07	5.13213e+07	5.41439e+07	38.53	2.77538e+07	2.81046e+07	45.95	1.85	0.89	0.0281274	1.55	0.119973	1.32757	197.155	836	13.9	Up
M198T125	281208	330385	340003	397870	215679	547945	63084.3	328895	1.0577e+06	2.07892e+06	1.499e+06	780384	1.10945e+06	760677	1.6564e+06	813726	1.21953e+06	1.08357e+06	39.37	313134	329640	44.62	3.89	1.96	0.0001554	3.81	0.00449411	1.86832	198.075	125.2	2.1	Up
M198T214	244459	190216	212547	190930	230922	198168	265608	307133	375573	376917	199308	221089	309974	341174	258378	312584	299374	311279	22.47	229998	221735	17.89	1.3	0.38	0.0281274	1.55	0.119973	1.26062	198.077	214.1	3.6	Up
M198T243	607232	424441	466541	331265	327206	353904	510515	345404	223278	34161	231155	776649	172361	367063	164305	253943	277864	227217	80	420813	389172	24.07	0.66	-0.6	0.0379176	1.42	0.147066	1.11613	198.041	243	4	Down
M198T31	66440.7	62253.1	68111.1	63324.7	39636.4	41618.1	70160.6	64691.2	10760.8	6484.23	7395.87	45748.6	8290.93	78559.4	43177.3	10064.3	26310.2	10412.6	101.31	59529.5	64008	20.07	0.44	-1.18	0.0379176	1.42	0.147066	1.58802	197.857	30.9	0.5	Down
M198T684	56826.3	1.04107e+06	60158.6	1.25711e+06	638075	290473	107712	897309	4.25003e+06	8.87358e+06	5.49055e+06	1.42036e+06	4.06225e+06	2.22049e+06	7.6464e+06	2.95881e+06	4.61531e+06	4.15614e+06	56.27	543591	464274	88.37	8.49	3.09	0.0001554	3.81	0.00449411	1.83615	197.808	684.3	11.4	Up
M198T704	2.5579e+06	2.0275e+06	1.85419e+06	2.47124e+06	1.29929e+06	2.46084e+06	2.54857e+06	3.02045e+06	1.15964e+07	1.62416e+07	2.53937e+07	4.85749e+06	7.06171e+06	1.48133e+07	2.51432e+07	6.96709e+06	1.40093e+07	1.32049e+07	57.02	2.28e+06	2.46604e+06	23.29	6.14	2.62	0.0001554	3.81	0.00449411	2.06747	197.808	703.8	11.7	Up
M198T82_1	3.45021e+07	1.07113e+07	2.26538e+07	2.32137e+07	2.61831e+07	8.26355e+06	119305	1.77125e+07	349205	83145.5	1.41951e+06	579284	443372	2.92697e+06	100516	28399.4	741300	396288	133.52	1.79199e+07	2.01832e+07	61.7	0.04	-4.6	0.0029526	2.53	0.0288032	1.72168	197.808	81.7	1.4	Down
M198T836	2.30629e+06	1.45552e+06	2.96054e+06	1.37379e+06	676821	348842	3.46623e+06	4.2907e+06	6.12089e+06	5.44986e+06	2.80125e+06	2.60273e+06	6.62331e+06	4.41699e+06	2.50807e+06	5.95129e+06	4.5593e+06	4.93342e+06	37.6	2.10984e+06	1.88091e+06	65.78	2.16	1.11	0.014763	1.83	0.078691	1.48562	198.158	836.2	13.9	Up
M198T90	333254	436504	320664	481540	243869	50342.7	97774.6	335039	568193	982018	678341	562933	525543	209431	239617	574739	542602	565563	44.97	287373	326959	52.52	1.89	0.92	0.0379176	1.42	0.147066	1.23515	198.071	90	1.5	Up
M199T303	21324.7	29131.9	61787.3	25433.3	48261.1	32067.8	21881.4	18281.5	118463	134312	64014.4	154725	111753	175550	147492	129365	129459	131838	25.83	32271.1	27282.6	46.95	4.01	2	0.0001554	3.81	0.00449411	2.0623	199.024	303.4	5.1	Up
M199T69_1	431031	286848	2.96855e+06	467371	617179	979816	3.30825e+06	832231	6.01047e+06	3.37523e+06	2.99902e+06	3.39722e+06	1.06897e+07	782013	2.68261e+06	2.1538e+06	4.01126e+06	3.18713e+06	76.58	1.23641e+06	724705	96.9	3.24	1.7	0.014763	1.83	0.078691	1.54453	198.972	69.4	1.2	Up
M199T69_2	8.14115e+06	8.04474e+06	8.03172e+06	8.14305e+06	7.66306e+06	8.16422e+06	7.99766e+06	8.48504e+06	8.11416e+06	8.31179e+06	9.01078e+06	8.75978e+06	8.22197e+06	8.64243e+06	8.34005e+06	8.20004e+06	8.45013e+06	8.32592e+06	3.76	8.08383e+06	8.09294e+06	2.82	1.05	0.06	0.0104118	1.98	0.0628046	1.37303	199.001	69.1	1.2	Up
M200T108	985831	744333	916578	389563	1.31565e+06	913637	1.44792e+06	833912	274040	152438	271581	560732	317627	477550	192923	383323	328777	295834	42.22	943429	915108	34.81	0.35	-1.52	0.000621601	3.21	0.0104451	1.8671	200.033	107.6	1.8	Down
M200T140	121483	43494.6	104232	69564.7	79870	75092	108264	112079	153562	102967	173928	173021	156689	156362	120642	113022	143774	154962	19.2	89260	92051.1	29.69	1.61	0.69	0.004662	2.33	0.0380456	1.68293	199.805	139.6	2.3	Up
M200T31	661028	567068	573547	528936	537813	492202	644371	564377	459112	243568	324770	465734	394319	448189	303226	470554	388684	421254	22.52	571168	565723	9.96	0.68	-0.56	0.0001554	3.81	0.00449411	1.74003	199.85	31	0.5	Down
M200T336	89533.4	21943.8	120838	22357.1	59248.6	20184.2	60608.5	16398.9	175712	78668.8	137541	125455	104430	96341.5	23086	161618	112856	114942	43.24	51389.1	40802.9	74.76	2.2	1.13	0.0104118	1.98	0.0628046	1.36498	200.129	335.7	5.6	Up
M200T535	277524	210569	138252	199957	97350.9	258241	167792	168011	512765	491255	481725	411647	190557	496755	312192	346528	405428	446686	28.19	189712	183984	31.55	2.14	1.1	0.0018648	2.73	0.0213197	1.74156	200.13	535.2	8.9	Up
M200T70	430892	399994	324878	384900	305685	404236	451179	555611	221208	247021	289644	265152	267573	302247	254097	352373	274914	266363	14.56	407172	402115	19.06	0.68	-0.57	0.000621601	3.21	0.0104451	1.78674	200.004	69.6	1.2	Down
M200T84	4.11767e+06	6.56345e+06	4.2819e+06	5.65358e+06	3.27585e+06	2.57004e+06	3.86772e+06	3.0966e+06	3.81193e+06	610238	3.03559e+06	2.83574e+06	2.71543e+06	3.30637e+06	2.0753e+06	2.20127e+06	2.57398e+06	2.77558e+06	37.77	4.17835e+06	3.9927e+06	32.04	0.62	-0.7	0.014763	1.83	0.078691	1.22503	199.937	84.3	1.4	Down
M201T107	943599	1.00185e+06	827288	758458	1.02285e+06	1.17373e+06	1.13723e+06	1.05379e+06	762926	145792	262638	952546	281100	305217	250325	797057	469700	293159	66.59	989848	1.01235e+06	14.44	0.47	-1.08	0.0029526	2.53	0.0288032	1.6614	201.052	107.4	1.8	Down
M201T157	1.14086e+06	32301.2	1.03848e+06	286405	1.14618e+06	209446	1.62541e+06	1.03423e+06	1.95241e+06	2.02879e+06	1.58417e+06	2.30516e+06	1.77531e+06	1.8369e+06	1.43618e+06	2.0081e+06	1.86588e+06	1.89465e+06	14.61	814164	1.03636e+06	69.32	2.29	1.2	0.000621601	3.21	0.0104451	1.46185	201.034	157.4	2.6	Up
M201T31_2	53189.1	53019	41679.3	55047.4	36622.3	38372.3	67672.1	42896.8	69249.5	71718.3	46329.9	71941.9	46756.6	63027.4	76020.8	58949	62999.2	66138.4	18.22	48562.3	47957.9	21.66	1.3	0.38	0.0206682	1.68	0.0984557	1.3261	200.914	31.1	0.5	Up
M201T408	106744	131456	89603.9	129645	119145	140801	62458.4	65419.8	224688	330074	98184.5	189418	225241	163965	286323	168580	210809	207053	34.7	105659	112944	28.62	2	1	0.0029526	2.53	0.0288032	1.58235	201.096	408.5	6.8	Up
M201T538	526835	279142	228372	629529	471241	335563	348873	492672	1.12709e+06	1.54848e+06	915734	1.56042e+06	1.25807e+06	1.31774e+06	954377	618718	1.16258e+06	1.19258e+06	28	414028	410057	33.13	2.81	1.49	0.0003108	3.51	0.00655521	1.98867	201.023	537.9	9	Up
M201T546	664619	1.66892e+06	999625	2.51471e+06	521491	854909	795167	1.14694e+06	504491	539727	260929	832059	767581	454315	394460	748248	562726	522109	35.79	1.1458e+06	927267	57.11	0.49	-1.03	0.0104118	1.98	0.0628046	1.45019	201.113	545.9	9.1	Down
M201T580	398238	795716	859721	764524	398101	923085	395675	958618	1.12511e+06	1.30818e+06	1.22322e+06	884095	1.0931e+06	975503	1.09321e+06	599100	1.03769e+06	1.09315e+06	21.28	686710	780120	36.05	1.51	0.6	0.00699301	2.16	0.0487438	1.31814	201.15	579.8	9.7	Up
M201T85	3.41193e+08	4.0707e+08	4.28596e+08	3.40889e+08	6.23663e+08	6.09519e+08	4.61862e+08	3.83422e+08	2.82854e+08	5.52909e+07	3.06487e+08	3.87434e+08	7.06214e+07	3.76393e+08	3.55737e+08	5.20645e+07	2.3586e+08	2.9467e+08	63.69	4.49527e+08	4.17833e+08	24.69	0.52	-0.93	0.00699301	2.16	0.0487438	1.38004	201.037	85.2	1.4	Down
M202T122_1	2.42374e+07	3.28021e+07	2.03316e+07	2.35123e+07	2.166e+07	1.8534e+07	1.9112e+07	1.42964e+07	1.93446e+07	6.73418e+06	1.47486e+07	1.95314e+07	3.2362e+06	1.72713e+07	1.42584e+07	1.93126e+07	1.43047e+07	1.60099e+07	43.14	2.18107e+07	2.09958e+07	24.89	0.66	-0.61	0.0281274	1.55	0.119973	1.17689	202.018	121.9	2	Down
M202T122_2	7.5658e+06	6.09058e+06	6.01768e+06	5.35234e+06	5.10098e+06	3.67767e+06	6.8276e+06	6.34299e+06	2.87253e+06	288657	3.36918e+06	3.02777e+06	2.83254e+06	3.43238e+06	1.20536e+06	3.91867e+06	2.61838e+06	2.95015e+06	47.04	5.87196e+06	6.05413e+06	20.1	0.45	-1.17	0.0003108	3.51	0.00655521	1.44675	202.108	121.9	2	Down
M202T344	2.90972e+08	2.47919e+08	3.16358e+08	1.46872e+08	1.15951e+08	1.77835e+08	2.85081e+08	2.35168e+08	1.37734e+08	3.88732e+07	9.36738e+07	2.72826e+08	1.18743e+08	8.05176e+07	2.77787e+07	7.04601e+07	1.05076e+08	8.70957e+07	73.44	2.27019e+08	2.41544e+08	32.08	0.46	-1.11	0.00699301	2.16	0.0487438	1.51971	202.018	344.4	5.7	Down
M202T662	419099	243921	88423.9	147033	49925	8656.89	143276	123086	710380	729426	425128	267543	417226	83366.7	216582	251570	387653	342384	59.95	152928	133181	84.08	2.53	1.34	0.0281274	1.55	0.119973	1.32868	202.153	662.3	11	Up
M202T85	3.43873e+07	2.9326e+07	2.39691e+07	4.13501e+07	1.5767e+07	1.24538e+07	1.94494e+07	2.47372e+07	5.01945e+07	5.67235e+07	5.57889e+07	3.41484e+07	3.76959e+07	2.8555e+07	2.50998e+07	4.99591e+07	4.22706e+07	4.38275e+07	29.43	2.518e+07	2.43532e+07	38.23	1.68	0.75	0.014763	1.83	0.078691	1.51523	202.041	85.2	1.4	Up
M203T114	15702.8	17479.8	16780.2	28698.4	43782.4	13054.8	34850.7	21015.3	49373.6	123349	60261.9	39598.3	26538.4	104607	103904	110211	77230.4	82083.1	48.26	23920.5	19247.6	45.34	3.23	1.69	0.0018648	2.73	0.0213197	1.80777	203.093	113.8	1.9	Up
M203T344	8.66938e+06	7.75775e+06	4.52367e+06	6.62363e+06	2.88265e+06	3.13844e+06	7.38509e+06	6.68774e+06	1.23151e+07	1.32697e+07	8.97446e+06	7.46067e+06	1.02648e+07	7.24273e+06	4.71536e+06	1.43282e+07	9.82138e+06	9.61962e+06	33.91	5.95854e+06	6.65568e+06	36.48	1.65	0.72	0.0206682	1.68	0.0984557	1.34995	203.021	344.3	5.7	Up
M203T372	8.27175e+06	6.94284e+06	8.67206e+06	4.78366e+06	6.4492e+06	1.06507e+07	8.32362e+06	1.00152e+07	1.98381e+06	81112.3	5.71518e+06	6.5561e+06	8.67773e+06	2.71204e+06	721127	612220	3.38242e+06	2.34793e+06	94.56	8.01363e+06	8.29768e+06	23.86	0.42	-1.24	0.014763	1.83	0.078691	1.35343	203.111	372.4	6.2	Down
M203T388	405961	431091	242866	319938	262779	279306	276353	268880	177655	124867	265946	406002	160488	110796	146304	120101	189020	153396	53.19	310897	277830	22.57	0.61	-0.72	0.014763	1.83	0.078691	1.52229	203.129	388.2	6.5	Down
M203T409	5093.53	1274.38	5116.11	4672.58	4522.43	3132.67	5538.92	4702.08	5769.64	10939.2	12757.6	12357.2	10823.1	3259.5	2141.04	8224.91	8284.01	9523.99	49.86	4256.59	4687.33	32.85	1.95	0.96	0.0498834	1.3	0.173853	1.17929	203.002	408.8	6.8	Up
M203T457	65233.6	54112.7	48250.7	38893.1	44245.3	43046.6	81488.3	24346	75197.7	65107.4	85824.1	55500	76293.2	82208.8	75104.5	94093.6	76166.2	75745.5	15.71	49952	46248	34.73	1.52	0.61	0.00699301	2.16	0.0487438	1.55907	203.002	456.8	7.6	Up
M203T570	175510	202665	165607	128142	206929	177203	191131	168843	323961	359803	470725	566547	351245	396802	430946	453052	419135	413874	18.78	177004	176356	14.07	2.37	1.24	0.0001554	3.81	0.00449411	2.18044	203.129	569.9	9.5	Up
M203T70	597862	721075	805277	735783	592480	565301	603298	651548	782643	916009	849200	736639	795554	1.01999e+06	916541	1.10808e+06	890583	882604	14.17	659078	627423	12.98	1.35	0.43	0.0010878	2.96	0.0151734	1.80126	203.02	69.9	1.2	Up
M203T82_1	1.78624e+06	1.30549e+06	1.843e+06	1.56043e+06	1.95226e+06	1.43471e+06	1.70883e+06	1.75604e+06	2.62852e+06	2.50299e+06	3.15937e+06	2.22061e+06	2.34284e+06	2.13108e+06	2.0397e+06	2.27669e+06	2.41272e+06	2.30976e+06	14.79	1.66838e+06	1.73243e+06	13.06	1.45	0.53	0.0001554	3.81	0.00449411	1.9735	203.056	82.5	1.4	Up
M204T132	140287	186898	163942	188163	720946	512376	143658	240390	307399	470664	369523	444924	475548	927578	1.34137e+06	833886	646362	473106	55.15	287082	187530	74.28	2.25	1.17	0.0206682	1.68	0.0984557	1.43376	204.053	132.4	2.2	Up
M204T155	23346.9	25132.7	28464.4	25970	26414.9	23369.7	24870.1	33041.1	41234	77685.2	48025.2	30456	42127.3	42180.9	39791.1	49009.7	46313.7	42154.1	29.97	26326.2	25551.3	12.09	1.76	0.81	0.0003108	3.51	0.00655521	1.90649	204.07	154.9	2.6	Up
M204T363	1.46825e+06	1.71569e+06	1.33068e+06	1.79903e+06	519818	1.22912e+06	887538	1.15694e+07	1.7333e+06	4.11124e+07	2.89002e+06	7.12869e+06	1.25256e+07	2.36289e+07	2.89834e+07	2.81758e+07	1.82723e+07	1.80773e+07	78.24	2.56494e+06	1.39947e+06	142.79	7.12	2.83	0.0018648	2.73	0.0213197	1.65266	204.086	362.9	6	Up
M204T473	185427	289152	274930	276584	213616	154975	190668	229468	93751.4	62067.1	82167.8	81554.9	83898.1	94140.1	55887.8	87289	80094.5	83032.9	17.45	226852	221542	21.75	0.35	-1.5	0.0001554	3.81	0.00449411	2.1603	204.132	473.2	7.9	Down
M205T334	549821	779410	364420	204328	166480	249022	327858	399552	48051.3	47597.7	55016.7	352813	57788.3	258192	29939.1	94427.7	117978	56402.5	101.58	380111	346139	53.11	0.31	-1.69	0.00699301	2.16	0.0487438	1.71737	204.981	334	5.6	Down
M205T344	82545	129106	101597	183012	104404	109872	105112	232059	174376	440128	239713	203703	252487	520881	870385	270943	371577	261715	63.08	130963	107492	38.68	2.84	1.5	0.0010878	2.96	0.0151734	1.72367	205.017	344.3	5.7	Up
M205T505	169847	174566	122777	217282	197221	340650	181278	186442	155740	146992	158320	135690	134688	157471	119907	151389	145025	149191	9.45	198758	183860	31.89	0.73	-0.45	0.00699301	2.16	0.0487438	1.42361	205.124	505.1	8.4	Down
M205T568	41775.1	13675	45756	37877.9	38728.1	30259	32747.2	33951.9	53383.1	32013.6	40040.5	57487.2	54729.4	48996.7	44031.3	43983.1	46833.1	46514	18.14	34346.3	35914.9	28.35	1.36	0.45	0.0206682	1.68	0.0984557	1.28177	205.054	568.2	9.5	Up
M205T581	941807	1.02559e+06	858744	233805	89307	761116	701617	59767.7	3.873e+06	4.57344e+06	2.88146e+06	204011	4.19766e+06	2.03072e+06	2.96209e+06	2.86948e+06	2.94898e+06	2.92177e+06	46.99	583969	731366	67.45	5.05	2.34	0.004662	2.33	0.0380456	1.50526	204.946	581.1	9.7	Up
M206T110	425601	660760	805520	872861	1.05103e+06	1.19566e+06	257239	258778	913231	996429	1.168e+06	1.68497e+06	996584	1.55805e+06	1.66102e+06	1.26026e+06	1.27982e+06	1.21413e+06	24.61	690931	733140	51.22	1.85	0.89	0.00699301	2.16	0.0487438	1.42922	206.013	109.6	1.8	Up
M206T122	2.82016e+06	2.353e+06	1.97572e+06	828441	1.75396e+06	1.65026e+06	1.22323e+06	778436	2.00664e+06	2.45676e+06	3.74039e+06	2.80389e+06	2.5202e+06	1.82772e+06	1.95981e+06	2.64223e+06	2.49471e+06	2.48848e+06	24.62	1.6729e+06	1.70211e+06	42.83	1.49	0.58	0.0379176	1.42	0.147066	1.28929	206.049	122.1	2	Up
M206T175	1.26994e+06	1.07486e+06	1.19021e+06	1.21661e+06	1.21425e+06	1.57927e+06	1.34976e+06	1.22575e+06	826243	867034	1.01426e+06	859699	1.09745e+06	1.31146e+06	1.05269e+06	1.13951e+06	1.02104e+06	1.03347e+06	16.26	1.26508e+06	1.22118e+06	11.73	0.81	-0.31	0.0104118	1.98	0.0628046	1.52475	206.013	175	2.9	Down
M206T292	158417	77056.9	166604	182257	114420	135724	135279	171861	160161	216631	183451	176512	178538	227650	165946	263207	196512	180995	18.22	142702	147070	24.34	1.38	0.46	0.0104118	1.98	0.0628046	1.47015	206.103	292.3	4.9	Up
M207T104	899714	977566	816619	189125	536077	816098	627192	1.23464e+06	713148	1.85919e+06	1.39459e+06	845895	1.13497e+06	1.9753e+06	1.56644e+06	1.55513e+06	1.38058e+06	1.47486e+06	32.85	762129	816358	41.26	1.81	0.86	0.014763	1.83	0.078691	1.34196	207.046	103.5	1.7	Up
M207T524	645308	373505	528470	626438	453540	339130	544040	442721	912864	1.03599e+06	1.16026e+06	800583	786047	745875	1.09903e+06	910226	931360	911545	16.48	494144	491005	22.55	1.88	0.91	0.0001554	3.81	0.00449411	2.07586	207.103	523.6	8.7	Up
M207T532	9510.57	187705	5975.3	2684.46	1865.34	4305.76	13594.9	4186.14	66949.9	16266.9	237864	229168	20374.2	113013	16409.1	86486.7	98316.6	76718.3	92.15	28728.4	5140.53	224	3.42	1.77	0.004662	2.33	0.0380456	1.49318	207.139	531.6	8.9	Up
M207T537	170957	191216	130470	251031	95117.2	93002.6	120489	167203	93511.1	45815	122566	48114.7	130021	104016	64437.7	109193	89709.5	98763.8	36.73	152436	148836	35.16	0.59	-0.76	0.0281274	1.55	0.119973	1.3661	207.031	537.1	9	Down
M207T550	378484	164350	260815	1.21723e+06	246524	238583	1.12388e+06	8.49879e+06	960073	1.4127e+06	691222	2.39936e+06	2.79472e+06	9.23833e+06	4.23134e+06	3.65414e+06	3.17274e+06	2.59704e+06	86.76	1.51608e+06	319649	188.12	2.09	1.07	0.0281274	1.55	0.119973	1.34092	206.943	549.8	9.2	Up
M207T581_1	867779	2.17798e+06	1.15908e+06	4.06824e+06	1.90717e+06	1.31328e+06	3.26669e+06	1.0561e+06	739503	361925	509034	513871	1.34285e+06	438008	510248	1.96372e+06	797395	512060	70.72	1.97704e+06	1.61022e+06	58.21	0.4	-1.31	0.014763	1.83	0.078691	1.51567	206.943	581.2	9.7	Down
M208T109	8.76787e+06	7.54666e+06	9.62648e+06	5.60421e+06	9.00985e+06	8.03814e+06	8.0966e+06	5.95917e+06	1.45328e+07	1.31489e+07	1.19411e+07	1.41873e+07	1.12499e+07	1.63908e+07	1.68632e+07	1.61361e+07	1.43063e+07	1.436e+07	14.61	7.83112e+06	8.06737e+06	18.15	1.83	0.87	0.0001554	3.81	0.00449411	2.03602	208.028	109	1.8	Up
M208T112	3.12537e+06	4.51598e+06	2.56743e+06	4.77098e+06	2.74821e+06	3.18722e+06	2.66095e+06	2.96063e+06	2.33992e+06	2.72021e+06	2.48741e+06	2.41092e+06	2.17336e+06	2.56459e+06	2.43482e+06	2.49166e+06	2.45286e+06	2.46112e+06	6.53	3.3171e+06	3.043e+06	25.6	0.74	-0.44	0.000621601	3.21	0.0104451	1.56118	208.072	112	1.9	Down
M208T37	808765	717258	828262	739047	703077	619243	839307	825393	830000	857465	779831	854262	884663	802341	795026	872724	834539	842131	4.64	760044	773906	10.3	1.1	0.13	0.0498834	1.3	0.173853	1.34209	207.931	37.1	0.6	Up
M208T495	230891	325681	265122	316651	260900	240782	118215	397560	435014	523984	446886	352666	606528	286322	338643	507128	437146	440950	24.58	269475	263011	30.43	1.62	0.7	0.0029526	2.53	0.0288032	1.51219	208.098	495.1	8.3	Up
M208T498	1.3899e+06	1.12614e+06	1.10914e+06	1.39328e+06	1.2103e+06	849081	1.21046e+06	1.77211e+06	1.89774e+06	1.63121e+06	2.3692e+06	1.93857e+06	1.54778e+06	1.61628e+06	1.42433e+06	1.78567e+06	1.77635e+06	1.70844e+06	16.69	1.25755e+06	1.21038e+06	21.49	1.41	0.5	0.0018648	2.73	0.0213197	1.72993	208.062	497.6	8.3	Up
M208T585	27833.8	12046.2	5510.81	24303.1	14275.2	20443.4	33019	18545.7	33007.2	76319.7	122154	61843.5	21693.6	98569.3	56622.8	76185	68299.3	69014.3	48.05	19497.1	19494.5	45.7	3.5	1.81	0.0018648	2.73	0.0213197	1.77928	208.134	584.9	9.7	Up
M209T100	2.73635e+06	7.75696e+06	3.95509e+06	7.67425e+06	3.8801e+06	3.58007e+06	2.66542e+06	6.7887e+06	7.78694e+06	7.71676e+06	7.55878e+06	5.05154e+06	8.2157e+06	6.57728e+06	8.55842e+06	8.00069e+06	7.43326e+06	7.75185e+06	15.11	4.87962e+06	3.91759e+06	44.34	1.52	0.61	0.014763	1.83	0.078691	1.42305	209.067	99.8	1.7	Up
M209T108_2	779448	563311	459922	861247	471115	481624	599630	595321	499136	955189	934904	947343	824685	733455	1.10441e+06	1.27871e+06	909729	941123	25.78	601452	579316	24.5	1.51	0.6	0.0104118	1.98	0.0628046	1.53631	209.036	107.7	1.8	Up
M209T112	305889	262654	273371	276384	342811	184654	317605	278653	269036	167881	223872	255962	227395	253757	185010	267726	231330	240576	16.42	280253	277518	16.78	0.83	-0.28	0.014763	1.83	0.078691	1.0606	209.076	112	1.9	Down
M209T324	445271	77190.9	466508	333330	325262	281029	452107	422477	729879	982767	834443	751594	836617	626606	640500	679601	760251	740737	15.76	350397	377903	37.12	2.17	1.12	0.0001554	3.81	0.00449411	1.7714	209.104	324.4	5.4	Up
M209T483	2.31269e+06	1.92524e+06	2.71611e+06	710592	1.33371e+06	1.32935e+06	1.59353e+06	2.03704e+06	1.03192e+06	73596.1	386843	1.48725e+06	2.1177e+06	353804	47244.7	1.20078e+06	837392	709382	88.86	1.74478e+06	1.75938e+06	36.36	0.48	-1.06	0.0281274	1.55	0.119973	1.25992	209.118	482.9	8	Down
M209T581	49094.5	85753.3	299112	311940	112767	77993.6	82105.5	92393.5	360287	156607	189397	531189	208034	181805	229113	245839	262784	218573	47.53	138895	89073.4	75.16	1.89	0.92	0.0379176	1.42	0.147066	1.41856	208.94	581	9.7	Up
M209T683	259021	162987	151280	223751	101954	100869	193770	102176	338264	211322	519830	222500	507437	372233	112961	702007	373319	355249	52.17	161976	157134	37.1	2.3	1.2	0.014763	1.83	0.078691	1.50552	209.118	683.1	11.4	Up
M209T784	492142	232377	638934	382395	331211	614751	346179	269773	1.33106e+06	551628	459153	417856	1.05796e+06	566178	525709	748639	707273	558903	45.85	413470	364287	36.93	1.71	0.77	0.0379176	1.42	0.147066	1.31762	209.155	783.5	13.1	Up
M210T130	162669	223411	135629	225654	125203	142972	127800	142098	212866	232775	380411	214318	269130	309528	267923	355018	280246	268526	22.53	160679	142535	25.54	1.74	0.8	0.0018648	2.73	0.0213197	1.84658	210.026	130.5	2.2	Up
M210T211	164577	241935	102183	233033	452160	131898	208382	107159	126030	39581.5	147098	191093	96209.3	91389	200126	67855.8	119923	111120	47.61	205166	186479	55.38	0.58	-0.77	0.0498834	1.3	0.173853	1.10814	210.024	210.6	3.5	Down
M210T326	303221	85044.8	311201	88682	225317	45464	351566	81072.9	408823	229645	257623	355014	402934	282882	317392	344409	324840	330900	20.1	186446	157000	66.87	1.74	0.8	0.0281274	1.55	0.119973	1.45469	210.026	325.6	5.4	Up
M210T334	71717.9	97145.9	87727.1	111383	97359.3	40178	99673.9	81560.3	43902.2	27922.7	41864.6	94658.2	38162	27269.9	25897.2	36616.6	42036.7	37389.3	53.15	85843.2	92436.5	25.71	0.49	-1.03	0.004662	2.33	0.0380456	1.66326	210.108	334	5.6	Down
M210T336	4.06101e+06	5.95725e+06	5.93642e+06	3.46968e+06	4.06918e+06	5.11342e+06	6.64552e+06	3.97297e+06	2.078e+06	3.49554e+06	2.13471e+06	4.19342e+06	2.53045e+06	4.10985e+06	2.52961e+06	4.27806e+06	3.1687e+06	3.01299e+06	30.05	4.90318e+06	4.5913e+06	23.86	0.65	-0.63	0.0498834	1.3	0.173853	1.56293	209.99	335.7	5.6	Down
M210T364	3.62668e+07	3.90808e+07	1.98172e+07	8.16318e+07	6.54235e+06	4.86937e+06	2.51138e+07	2.20053e+07	6.66907e+07	1.15793e+08	7.71299e+07	5.48827e+07	5.75791e+07	8.30083e+07	7.98572e+07	8.48707e+07	7.74765e+07	7.84936e+07	24.79	2.94159e+07	2.35595e+07	82.85	2.63	1.4	0.0029526	2.53	0.0288032	1.68467	209.99	363.9	6.1	Up
M210T376	27684.5	68565.7	9744.27	435809	13072.4	201931	10660.4	42913	240017	1.51285e+06	778331	290814	345823	103879	1.08272e+06	82092.5	554565	318318	93.59	101298	35298.7	147.52	5.47	2.45	0.00699301	2.16	0.0487438	1.52737	210.077	376.3	6.3	Up
M210T387	9926.67	39155.2	27166.5	33448.8	22071.9	32979.4	8555.95	13973.7	43061.9	140340	70083	49153.8	76309.6	68863.3	81091.2	96684.3	78198.4	73196.3	38.81	23409.8	24619.2	49.7	3.34	1.74	0.0001554	3.81	0.00449411	1.83342	210.041	386.7	6.4	Up
M210T74	652730	581647	587055	511092	398368	842248	326641	548296	745905	1.51204e+06	1.13645e+06	803690	1.12235e+06	2.37475e+06	1.84401e+06	2.02984e+06	1.44613e+06	1.32425e+06	41.07	556010	564972	28.23	2.6	1.38	0.000621601	3.21	0.0104451	1.81506	210.034	73.9	1.2	Up
M210T95	4.82992e+06	6.80162e+06	3.59975e+06	6.86386e+06	4.08913e+06	4.86595e+06	3.37623e+06	3.9509e+06	6.29845e+06	5.2909e+06	7.02126e+06	4.51182e+06	6.11188e+06	7.62438e+06	9.72248e+06	1.06303e+07	7.15143e+06	6.65986e+06	29.52	4.79717e+06	4.45953e+06	28.37	1.49	0.58	0.0206682	1.68	0.0984557	1.36665	210.044	94.7	1.6	Up
M211T108	1.61962e+06	1.58272e+06	1.90116e+06	1.7535e+06	1.75262e+06	1.98703e+06	1.43677e+06	1.86959e+06	1.95798e+06	1.71671e+06	2.08269e+06	2.37551e+06	2.00711e+06	2.09548e+06	1.83891e+06	2.12782e+06	2.02528e+06	2.0449e+06	9.81	1.73788e+06	1.75306e+06	10.55	1.17	0.22	0.014763	1.83	0.078691	1.4231	210.983	107.7	1.8	Up
M211T399	430422	540218	529015	525541	519194	478494	188849	480292	518255	761109	512108	640119	542980	688812	518359	600732	597809	571856	15.45	461503	499743	25.13	1.3	0.37	0.0379176	1.42	0.147066	1.09091	211.097	399.4	6.7	Up
M211T616	723331	1.01455e+06	1.09722e+06	1.32891e+06	989682	781809	889185	739089	3.21421e+06	3.92279e+06	5.71294e+06	4.11485e+06	5.32228e+06	5.4114e+06	3.72161e+06	5.71297e+06	4.64163e+06	4.71857e+06	21.59	945472	939434	21.85	4.91	2.3	0.0001554	3.81	0.00449411	2.25432	211.134	615.7	10.3	Up
M211T82	7.35972e+06	1.02532e+07	7.62961e+06	7.87202e+06	7.58753e+06	5.14849e+06	6.48132e+06	7.56389e+06	1.24513e+07	2.09332e+07	1.66652e+07	9.53797e+06	1.38063e+07	1.59302e+07	1.4823e+07	1.55793e+07	1.49658e+07	1.52011e+07	22.15	7.48697e+06	7.57571e+06	19.11	2	1	0.0003108	3.51	0.00655521	2.02023	210.841	82.5	1.4	Up
M212T113	61232.7	32869.3	55058.1	33639.6	66688.7	53554.6	14755	37475.8	64074.8	59264.2	58923.7	54370.8	54568.2	70981.8	59890.9	67612.9	61210.9	59577.6	9.69	44409.2	45515.2	39.49	1.38	0.46	0.0498834	1.3	0.173853	1.17517	212.067	112.7	1.9	Up
M212T296	629452	2.64635e+06	565383	1.15599e+06	867782	69447.4	972377	1.52767e+06	641928	11885.5	202438	1.08719e+06	535949	18740.4	20285.4	339442	357232	270940	106.72	1.05431e+06	920079	73.47	0.34	-1.56	0.0281274	1.55	0.119973	1.15208	212.093	295.5	4.9	Down
M212T763	617086	750985	749594	285082	514855	628149	412763	482590	821969	825276	608801	713903	1.23027e+06	855525	727377	1.00102e+06	848019	823622	22.75	555138	565970	29.32	1.53	0.61	0.0104118	1.98	0.0628046	1.45637	212.108	762.6	12.7	Up
M212T82	3.55052e+06	3.94067e+06	4.30216e+06	3.10741e+06	2.97284e+06	1.67355e+06	3.26249e+06	3.0005e+06	2.13404e+06	633825	1.43595e+06	2.4712e+06	2.82538e+06	928605	974499	2.09531e+06	1.68735e+06	1.76563e+06	47.69	3.22627e+06	3.18495e+06	24.33	0.52	-0.94	0.0018648	2.73	0.0213197	1.50795	211.97	82	1.4	Down
M213T419	77910	22990.3	93176.2	56134.3	58944.6	26930.2	72216.8	208624	188782	297374	207960	79066.4	388855	205548	156733	393269	239699	206754	46.41	77115.8	65580.7	75.61	3.11	1.64	0.004662	2.33	0.0380456	1.77092	213.005	419.2	7	Up
M213T592	97058.7	56497.9	57954.7	41989.8	97295.4	59729.7	124277	66693.2	433459	155643	368618	214688	205911	244005	279295	185626	260906	229347	36.62	75187.1	63211.4	37.06	3.47	1.79	0.0001554	3.81	0.00449411	2.07772	213.056	591.7	9.9	Up
M213T656	1.80809e+06	1.28181e+06	1.61968e+06	1.56129e+06	1.99405e+06	1.10022e+06	2.68276e+06	1.25335e+06	850714	913417	1.19731e+06	1.33391e+06	1.39588e+06	1.38994e+06	1.03173e+06	1.37714e+06	1.18625e+06	1.26561e+06	18.98	1.66266e+06	1.59049e+06	30.61	0.71	-0.49	0.0498834	1.3	0.173853	1.22613	213.15	656.1	10.9	Down
M213T86	5.19718e+07	7.39057e+07	4.40377e+07	7.52298e+07	5.83082e+07	8.2443e+07	6.20994e+07	5.62729e+07	3.52538e+07	3.35673e+07	5.12435e+07	4.41278e+07	2.22119e+07	2.76413e+07	3.17465e+07	3.33073e+07	3.48874e+07	3.34373e+07	26.1	6.30336e+07	6.02038e+07	20.74	0.55	-0.85	0.000621601	3.21	0.0104451	1.88787	213.049	86.4	1.4	Down
M213T89	812411	847227	844949	970109	731070	673537	936127	1.08899e+06	472298	458221	555257	555923	537146	589747	484019	663445	539507	546202	12.65	863053	846088	15.44	0.63	-0.68	0.0001554	3.81	0.00449411	1.97271	213.037	88.6	1.5	Down
M214T155	270947	170417	1.1158e+06	805921	220059	502026	171912	156148	790110	1.17961e+06	1.09167e+06	986622	1.10449e+06	304505	928493	943780	916160	965201	30.08	426653	245503	83.81	2.15	1.1	0.0206682	1.68	0.0984557	1.50648	214.072	154.9	2.6	Up
M214T395	309624	199892	331362	199520	232761	238163	274153	250920	153853	120511	97453.7	166974	155874	239653	101311	226367	157750	154863	33.65	254549	244541	18.83	0.62	-0.69	0.004662	2.33	0.0380456	1.65124	214.072	395.4	6.6	Down
M214T429	14400.4	33448.3	47408.3	38983.4	8475.28	12505.8	11477.8	13323.3	22455.6	48499.7	34660.6	20178	44391.7	43328.4	36629.6	51810.4	37744.3	39979	30.73	22502.8	13861.9	66.76	1.68	0.75	0.0379176	1.42	0.147066	1.30057	214.018	429.2	7.2	Up
M214T442	47187.9	4574.67	25587.2	5452.72	7884.19	3299.03	3650.47	3089.98	50421.7	194039	6843.54	43282.9	9101.51	184355	100965	312809	112727	75693.4	96.34	12590.8	5013.69	125.93	8.95	3.16	0.004662	2.33	0.0380456	1.54908	213.964	441.8	7.4	Up
M214T670	5.07848e+06	9.16904e+06	4.56122e+06	9.02455e+06	4.02648e+06	6.91355e+06	3.83613e+06	5.61052e+06	3.2603e+06	4.75454e+06	2.82416e+06	3.46914e+06	3.57822e+06	3.04717e+06	3.9399e+06	3.05931e+06	3.49159e+06	3.36472e+06	17.75	6.02749e+06	5.3445e+06	35.29	0.58	-0.79	0.0018648	2.73	0.0213197	1.71873	214.153	670.3	11.2	Down
M215T296	65889.6	117695	83594.5	136003	117432	180254	75105	96084.6	65960.5	713721	978801	174056	574406	464190	122977	1.163e+06	532139	519298	76.16	109007	106758	34.28	4.88	2.29	0.0206682	1.68	0.0984557	1.50959	215.049	296.4	4.9	Up
M215T303	117002	104958	167534	199807	179778	29851.9	112403	19079	510693	941090	868218	642874	162942	434616	807768	395606	595476	576784	44.94	116302	114702	56.94	5.12	2.36	0.0010878	2.96	0.0151734	1.86161	215.092	303.3	5.1	Up
M215T471	6.46344e+06	3.88807e+06	3.93756e+06	7.29541e+06	4.66001e+06	2.12646e+06	4.96587e+06	5.62634e+06	107639	413448	151942	101553	303900	14268.2	1.23949e+06	103733	304496	129791	131	4.87039e+06	4.81294e+06	33.3	0.06	-4	0.0001554	3.81	0.00449411	2.01197	215.129	470.6	7.8	Down
M216T107	9875.08	46558.7	60891.5	69739.2	70313.2	9356.86	80613.4	59100.4	95835.2	117533	127920	171785	65238.2	110382	103628	90647	110371	107005	28.27	50806	59996	53.69	2.17	1.12	0.0010878	2.96	0.0151734	1.51749	216.099	107.3	1.8	Up
M216T304	32262.8	23428.1	25096.1	24762.4	31932.1	29502.5	28381	36404.4	56632.6	37075.9	38088.3	43161.4	61198.6	28384.4	33757.4	44771.3	42883.7	40624.8	26.12	28971.2	28941.8	15.38	1.48	0.57	0.0029526	2.53	0.0288032	1.60986	216.088	304.1	5.1	Up
M216T361	129660	109686	139701	145487	82891.4	68396.8	140946	109914	165567	173567	231264	246233	160764	175452	83714.2	236405	184121	174510	29.01	115835	119787	24.59	1.59	0.67	0.004662	2.33	0.0380456	1.48136	216.034	360.9	6	Up
M216T371	343481	52402.2	353185	187446	285882	31689.2	255555	35908.4	514740	554789	392281	504716	342143	344090	390328	310955	419255	391305	22.02	193194	221501	70.9	2.17	1.12	0.0029526	2.53	0.0288032	1.52561	215.528	371	6.2	Up
M216T519	634169	1.51293e+06	562977	1.18514e+06	702452	55235.4	997052	236092	271023	166046	288110	797621	35713.7	223204	155073	208096	268111	215650	85.01	735756	668310	65.55	0.36	-1.46	0.0498834	1.3	0.173853	1.02553	216.124	518.7	8.6	Down
M216T85	1.50989e+07	2.50622e+07	1.64208e+07	2.81103e+07	1.63726e+07	1.40257e+07	1.33983e+07	1.73405e+07	1.9595e+07	2.30232e+07	2.83879e+07	2.01541e+07	2.54212e+07	1.74812e+07	1.81595e+07	3.02497e+07	2.2809e+07	2.15887e+07	21.01	1.82287e+07	1.63967e+07	29.52	1.25	0.32	0.0281274	1.55	0.119973	1.11459	216.049	84.8	1.4	Up
M216T91_1	129376	150034	106820	127061	63175.4	173335	113013	137819	789795	6.7134e+06	2.3837e+06	1.55455e+06	355606	1.8775e+06	3.26815e+06	2.85464e+06	2.47467e+06	2.1306e+06	79.78	125079	128219	26.08	19.78	4.31	0.0001554	3.81	0.00449411	2.09666	216.036	90.6	1.5	Up
M216T92	535292	325310	488655	362861	417709	211747	522478	284315	564454	662470	612459	547975	512011	719711	593622	1.02597e+06	654834	603041	25	393546	390285	29.9	1.66	0.73	0.000621601	3.21	0.0104451	1.73194	216.076	91.6	1.5	Up
M216T97	4.56428e+06	2.09981e+06	5.77301e+06	3.0376e+06	2.57697e+06	1.69209e+06	3.56142e+06	4.8863e+06	1.24913e+06	301159	1.62893e+06	4.62133e+06	1.77817e+06	2.78284e+06	553155	1.09599e+06	1.75134e+06	1.43903e+06	79.4	3.52393e+06	3.29951e+06	40.86	0.5	-1.01	0.0206682	1.68	0.0984557	1.30058	216.051	97.1	1.6	Down
M217T368	48063.3	48155.6	46299.8	59545	48197.4	23410.6	42461.7	53298.6	30906.4	14941.8	34920	39927.6	40002.2	11496.4	13644.9	20333.1	25771.5	25619.7	46.62	46179	48109.5	22.76	0.56	-0.84	0.0018648	2.73	0.0213197	1.43977	216.809	368.5	6.1	Down
M217T432_1	254730	362335	374154	386480	103177	114026	94294.4	383359	65091.3	17384.2	13568.5	15777.6	88650	27121.1	39925.8	26240	36719.8	26680.6	73.24	259070	308533	52.22	0.14	-2.82	0.0001554	3.81	0.00449411	1.97319	217.062	432.2	7.2	Down
M217T476	83247.9	42301.9	57830.3	10303.8	71654.9	21857.4	42514.9	11936.6	289722	345882	212733	131233	249138	223444	181767	281182	239388	236291	28.11	42706	42408.4	63.46	5.61	2.49	0.0001554	3.81	0.00449411	2.00565	217.017	475.8	7.9	Up
M217T531	4954.17	15125.6	4481.82	4619.98	443.486	4802.71	6797.54	4977.07	7771.08	21614.2	57924.1	32330	10772.1	19905.7	4408.48	39923.2	24331.1	20759.9	74.78	5775.3	4878.44	72.34	4.21	2.07	0.014763	1.83	0.078691	1.47655	216.964	531.5	8.9	Up
M217T85	6.21305e+07	4.9847e+07	8.83237e+07	6.63036e+07	6.60465e+07	8.28031e+07	5.76805e+07	5.96854e+07	2.60258e+07	2.25706e+07	3.85912e+07	1.81855e+08	2.04511e+07	6.39198e+07	1.81665e+07	2.65204e+07	4.97625e+07	2.62731e+07	111.3	6.66025e+07	6.40885e+07	19.35	0.75	-0.42	0.0379176	1.42	0.147066	1.18136	217.011	85.1	1.4	Down
M217T99	471817	355433	503637	318338	369205	438576	328420	286407	431308	390263	930291	701239	576590	479366	382963	707813	574979	527978	33.56	383979	362319	20.4	1.5	0.58	0.0206682	1.68	0.0984557	1.42166	217.035	99.1	1.7	Up
M218T151	2.79091e+07	1.19968e+07	1.98461e+07	3.45686e+07	3.4099e+07	2.50711e+07	3.06745e+07	4.17601e+07	3.92676e+07	2.67142e+08	2.65612e+07	3.62836e+07	4.71229e+07	2.87758e+08	2.46004e+08	2.10212e+08	1.45044e+08	1.28667e+08	80.89	2.82407e+07	2.92918e+07	32.99	5.14	2.36	0.00699301	2.16	0.0487438	1.50767	218.104	151	2.5	Up
M218T85	9.66953e+06	1.96902e+07	1.2923e+07	1.49e+07	2.81113e+07	4.90906e+06	1.22498e+07	6.00735e+06	1.04634e+07	2.55705e+06	8.89953e+06	1.7294e+07	2.93299e+06	4.03785e+06	3.1244e+06	2.93135e+06	6.53008e+06	3.58113e+06	81.12	1.35575e+07	1.25864e+07	55.77	0.48	-1.05	0.0281274	1.55	0.119973	1.28055	218.012	85.1	1.4	Down
M219T149	127219	106207	100595	124419	62532.8	98011.7	145363	103330	181669	181122	173734	156953	153472	249562	233195	239355	196133	181396	19.64	108460	104769	22.8	1.81	0.85	0.0001554	3.81	0.00449411	1.91173	218.992	148.6	2.5	Up
M219T361	535920	1.22241e+06	346917	299497	475466	279664	469706	424900	234016	14650.7	342448	337645	162984	30904.2	33153.9	405881	195210	198500	80.94	506810	447303	59.76	0.39	-1.38	0.00699301	2.16	0.0487438	1.35907	219.077	361.2	6	Down
M219T413	42760.3	50526.6	54765.4	31583.1	25519.5	46030.4	49114.6	34381.8	13038.3	3687.02	3978.1	11186.6	34449.3	9959.22	1458.06	9213.66	10871.3	9586.44	95.34	41835.2	44395.3	24.59	0.26	-1.94	0.0010878	2.96	0.0151734	1.84985	218.999	413.3	6.9	Down
M219T563	1.8842e+06	1.96894e+06	1.33006e+06	954325	1.73391e+06	1.22773e+06	1.21682e+06	2.72296e+06	3.179e+06	2.50985e+06	2.32713e+06	3.11771e+06	2.99783e+06	2.78183e+06	2.04245e+06	2.13934e+06	2.63689e+06	2.64584e+06	16.9	1.62987e+06	1.53199e+06	34.89	1.62	0.69	0.0018648	2.73	0.0213197	1.65666	218.986	562.6	9.4	Up
M220T122_2	6.83973e+06	7.12335e+06	7.30344e+06	6.95503e+06	7.93591e+06	7.88936e+06	8.31621e+06	7.08781e+06	6.26623e+06	6.41452e+06	6.466e+06	7.02368e+06	6.47784e+06	7.2966e+06	6.47068e+06	7.23122e+06	6705846	6.47426e+06	6.09	7.43136e+06	7.2134e+06	7.29	0.9	-0.15	0.0206682	1.68	0.0984557	1.49561	220.107	122.2	2	Down
M220T147	302695	312520	221812	142678	257935	128337	265578	239863	63246.9	24518.7	42173.5	153135	134535	210192	33225.1	238576	112450	98891.1	74.38	233927	248899	28.97	0.48	-1.06	0.0104118	1.98	0.0628046	1.44453	220.065	147.3	2.5	Down
M220T287	6009.55	105219	50892.5	114007	96002.2	85075	5914.74	160566	191859	235050	151205	212101	164046	162715	159011	110796	173348	163380	22.3	77960.8	90538.6	69.15	2.22	1.15	0.0018648	2.73	0.0213197	1.2784	220.028	286.6	4.8	Up
M220T545	166359	223798	196211	365495	209677	72599.3	123427	219150	185321	729341	381580	282487	435053	194905	373312	572617	394327	377446	47.18	197090	202944	43.56	2	1	0.0281274	1.55	0.119973	1.46784	220.034	545.1	9.1	Up
M220T98	916437	741381	955870	577705	911251	572455	888587	699661	2.7058e+06	2.57521e+06	2.92526e+06	2.8008e+06	2.26601e+06	2.23477e+06	2.8991e+06	3.1197e+06	2.69083e+06	2.7533e+06	11.72	782919	814984	19.93	3.44	1.78	0.0001554	3.81	0.00449411	2.27439	220.082	98.3	1.6	Up
M221T108_1	758877	859146	426371	997027	450363	506643	753040	774977	987358	1.17457e+06	1.09283e+06	896556	1.1744e+06	714643	819510	776212	954511	941957	18.9	690806	755959	29.94	1.38	0.47	0.0281274	1.55	0.119973	1.36465	220.939	107.6	1.8	Up
M221T108_2	3.75723e+06	3.31376e+06	3.47821e+06	5.8786e+06	3.81199e+06	4.40841e+06	3.73086e+06	4.15464e+06	4.06235e+06	3.89991e+06	5.74442e+06	6.28879e+06	5.53191e+06	6.63308e+06	6.4684e+06	4.76894e+06	5.42472e+06	5.63816e+06	19.73	4.06671e+06	3.78461e+06	19.92	1.33	0.42	0.014763	1.83	0.078691	1.43227	221.03	108.4	1.8	Up
M221T303	1.19748e+06	764970	535256	93746	187528	114809	270449	292153	35180.8	132773	52513.5	141806	57817.5	210176	111928	76650.1	102356	94289.1	57.01	432049	281301	88.7	0.24	-2.08	0.0104118	1.98	0.0628046	1.52197	220.94	302.6	5	Down
M221T312	238250	188867	237447	224385	344628	231003	330727	220198	176696	91380	125979	119847	176073	144994	86807.2	174896	137084	135486	27.04	251938	234225	21.94	0.54	-0.88	0.0001554	3.81	0.00449411	1.8339	221.068	312.1	5.2	Down
M221T367	31325.1	100774	18396.7	145149	9224.68	3395.38	19140.7	29283.8	271343	144497	238090	107405	228839	24233.9	234491	220349	183656	224594	45.74	44586.1	24212.3	113.61	4.12	2.04	0.004662	2.33	0.0380456	1.6414	221.101	366.6	6.1	Up
M221T507_1	3.17464e+06	1.35138e+06	1.47169e+06	84581.1	2.82347e+06	1.05999e+06	2.63813e+06	2.19227e+06	349320	362156	31714.4	132180	57385	1.22152e+06	34893.8	533566	340342	240750	117.86	1.84952e+06	1.83198e+06	56.24	0.18	-2.44	0.004662	2.33	0.0380456	1.54329	221.082	506.7	8.4	Down
M221T577	331775	493539	347081	229929	254569	152797	273057	144655	358129	407278	405986	517122	495749	636562	578424	1.60551e+06	625595	506436	65.03	278425	263813	40.83	2.25	1.17	0.0010878	2.96	0.0151734	1.58257	221.082	576.8	9.6	Up
M221T83	5.80592e+06	7.26187e+06	4.90009e+06	6.41814e+06	3.9051e+06	1.76179e+06	5.25188e+06	8.22504e+06	3.90363e+06	3.36741e+06	1.92958e+06	1.38615e+06	2.73516e+06	1.69383e+06	1.83139e+06	2.21549e+06	2.38283e+06	2.07254e+06	36.9	5.44123e+06	5.5289e+06	37	0.44	-1.19	0.004662	2.33	0.0380456	1.59795	220.87	83	1.4	Down
M222T335	55053.3	45268.5	48038.1	69136.3	52301.3	66638.3	54997.5	50298.2	70947.1	144872	91048.3	104556	73454.2	92897.1	37939.8	136166	93985	91972.7	37.26	55216.4	53649.4	15.42	1.7	0.77	0.0104118	1.98	0.0628046	1.41994	222.044	335.3	5.6	Up
M222T336	102820	108199	99021.9	119870	85939.8	73841.2	91162.2	101659	69863.1	27715.3	70747.3	56736.9	73883.3	15376.4	42255.2	17027.3	46700.6	49496.1	52.43	97814.2	100340	14.44	0.48	-1.07	0.0003108	3.51	0.00655521	1.61214	222.097	336.1	5.6	Down
M222T34	161591	142081	119105	155281	120029	93012.2	138479	146007	180196	178008	195399	175989	178287	144045	133159	182623	170963	178148	12.31	134448	140280	16.72	1.27	0.35	0.0104118	1.98	0.0628046	1.56488	221.842	33.7	0.6	Up
M222T382	24995.8	82864.5	85548	125895	161748	217067	114870	80145.2	19289.5	21397.1	118035	31543.3	24390.4	33767.8	34353.8	17121.1	37487.2	27966.9	88.61	111642	100209	52.28	0.34	-1.57	0.0104118	1.98	0.0628046	1.62442	222.077	381.8	6.4	Down
M222T54	315298	339419	383671	337370	409903	250826	373113	322960	350514	377921	339735	413141	434021	446303	420119	386660	396052	399900	9.78	341570	338394	14.31	1.16	0.21	0.014763	1.83	0.078691	1.30391	221.8	53.7	0.9	Up
M222T741	1.04287e+06	2.6908e+06	874976	2.81217e+06	742923	356596	1.35386e+06	2.91875e+06	987856	6.13637e+06	3.85668e+06	4.87091e+06	5.3237e+06	3.49482e+06	2.20896e+06	3.92701e+06	3.85079e+06	3.89185e+06	43.3	1.59912e+06	1.19837e+06	65.05	2.41	1.27	0.0104118	1.98	0.0628046	1.46023	222.125	741.4	12.4	Up
M222T752	1.30469e+06	1.18258e+06	225870	502940	396042	86552	314550	385674	2.20668e+06	2.21152e+06	2.98935e+06	489760	895955	1.77159e+06	2.90791e+06	619345	1.76151e+06	1.98914e+06	56.34	549862	390858	81.27	3.2	1.68	0.00699301	2.16	0.0487438	1.54302	221.8	752.1	12.5	Up
M223T122_1	1.36712e+06	1.18466e+06	2.1154e+06	1.02132e+06	1.40205e+06	830985	1.87751e+06	1.97261e+06	2.44424e+06	1.53006e+06	1.97774e+06	3.31134e+06	2.32897e+06	2.24555e+06	1.58397e+06	2.40856e+06	2.2288e+06	2.28726e+06	25.31	1.47146e+06	1.38458e+06	31.89	1.51	0.6	0.00699301	2.16	0.0487438	1.51281	223.028	122	2	Up
M223T122_2	3.36725e+06	3.09563e+06	3.7878e+06	4.3472e+06	3.73027e+06	2.62047e+06	4.13292e+06	6.91112e+06	1.16362e+07	4.8e+06	6.14082e+06	6.16935e+06	7.10453e+06	7.60951e+06	6.42984e+06	1.02529e+07	7.51789e+06	6.76718e+06	30.54	3.99908e+06	3.75904e+06	32.54	1.88	0.91	0.0018648	2.73	0.0213197	1.81051	223.075	121.9	2	Up
M223T583	603149	1.0122e+06	566577	1.697e+06	501354	342972	1.15034e+06	1.04975e+06	1.8968e+06	1.02283e+06	1.15965e+06	924312	1.22668e+06	1.37993e+06	1.38958e+06	1.08895e+06	1.26109e+06	1.19316e+06	24.09	865418	807672	51.52	1.46	0.54	0.0498834	1.3	0.173853	1.2728	223.028	583.2	9.7	Up
M223T742	1.01143e+06	1.53974e+06	1.22726e+06	3.84963e+06	1.60277e+06	1.10747e+06	1.46269e+06	2.1265e+06	4.9424e+06	5.20811e+06	6.9094e+06	2.0201e+06	9.77654e+06	4.16794e+06	4.01311e+06	2.33917e+06	4.9221e+06	4.55517e+06	50.99	1.74093e+06	1.50121e+06	52.87	2.83	1.5	0.0010878	2.96	0.0151734	1.76335	223.028	742.4	12.4	Up
M224T331	23861.3	26456.5	21717.5	25868.5	27921.1	13220.5	13038.7	11222.7	24935.3	48044.5	37454	39744	28640	26728.9	50412.9	30215.6	35771.9	33834.8	27.24	20413.3	22789.4	33.47	1.75	0.81	0.0018648	2.73	0.0213197	1.62053	224.104	330.9	5.5	Up
M224T432	42.081	323.466	106.465	404.54	736.531	111.774	129.34	170.663	33565.3	97528.1	23272.6	265.626	36851.3	14534.9	76891.2	22591.8	38187.6	28418.9	85.75	253.11	150	90.8	150.88	7.24	0.0010878	2.96	0.0151734	2.00293	224.076	432.3	7.2	Up
M224T54	433660	432055	343402	466770	348520	339401	443203	468163	532960	590412	556318	509436	572071	486984	526419	577648	544031	544639	6.63	409397	432858	13.68	1.33	0.41	0.0001554	3.81	0.00449411	1.93088	223.798	53.8	0.9	Up
M224T544	102558	154299	311006	134206	97024.8	213100	125731	53867.4	142487	310261	445391	527633	523377	197981	205119	450574	350353	377826	44.42	148974	129969	53.85	2.35	1.23	0.0104118	1.98	0.0628046	1.54693	224.129	543.5	9.1	Up
M224T562	24784	29589.9	83380.8	29901.7	6250.15	9008.6	17367.7	20796	43678.9	22716.2	55007.4	78871.4	89213.7	29347.5	85230.9	83773.4	60979.9	66939.4	43.94	27634.9	22790	87.37	2.21	1.14	0.0206682	1.68	0.0984557	1.46891	224.056	561.7	9.4	Up
M224T583	85051.6	162260	78629.7	231195	80218.4	70155.6	153293	202604	203100	481859	325978	176159	446538	181617	150010	455058	302540	264539	46.82	132926	119172	47.36	2.28	1.19	0.014763	1.83	0.078691	1.59307	224.028	583.2	9.7	Up
M224T747	30159.6	30019.6	19763.3	47355	10070.4	8630.04	15195.8	11150.8	57178.7	156711	63400.6	27079.7	107783	99571.1	99453.2	179662	98855	99512.1	51.44	21543.1	17479.6	62.33	4.59	2.2	0.0010878	2.96	0.0151734	1.87703	224.166	747	12.4	Up
M225T378	88066	39360.5	65286.3	60337.3	83152	90156.9	76626	52628.5	110633	124323	154633	239638	127095	148743	163845	162570	153935	151688	25.77	69451.7	70956.1	26.12	2.22	1.15	0.0001554	3.81	0.00449411	1.98615	225.088	377.7	6.3	Up
M225T454	87462.1	111145	56003.8	187472	58701.8	72690.6	84065.5	112514	1425.34	114471	35127.1	9170.96	5623.12	36835	36439.4	1553.07	30080.6	22149.1	125.04	96256.7	85763.8	44.11	0.31	-1.68	0.00699301	2.16	0.0487438	1.54973	225.007	454.4	7.6	Down
M225T614_1	20602.5	29981.4	81000.3	42177.5	68804.5	35004.5	46014.1	66839.2	69005.3	65442.5	167797	83452.7	48988.6	100132	46912.1	47274.1	78625.6	67223.9	51.71	48803	44095.8	43.49	1.61	0.69	0.0498834	1.3	0.173853	1.18816	225.007	614	10.2	Up
M225T69_2	2.79642e+06	2.85906e+06	2.87265e+06	3.49686e+06	2.02387e+06	2.3139e+06	1.76394e+06	3.20828e+06	3.89676e+06	2.83884e+06	4.21907e+06	4.20282e+06	2.88018e+06	3.06739e+06	4.28471e+06	2.90439e+06	3.53677e+06	3.48207e+06	18.93	2.66687e+06	2.82774e+06	22.1	1.33	0.41	0.0206682	1.68	0.0984557	1.38668	225.007	69.1	1.2	Up
M225T710	389509	1.01249e+06	524977	683926	55476.7	227749	332537	407075	887052	1.08943e+06	606459	387803	794519	1.69022e+06	1.20496e+06	2.51026e+06	1.14634e+06	988239	59.17	454217	398292	64.51	2.52	1.34	0.014763	1.83	0.078691	1.37114	225.149	709.9	11.8	Up
M225T85	1.20223e+07	1.31528e+07	1.63876e+07	9.82343e+06	1.69928e+07	1.41566e+07	1.47162e+07	1.23785e+07	1.12525e+07	2.17051e+06	1.14365e+07	1.19714e+07	1.02645e+07	1.22576e+07	1.11147e+07	9.60677e+06	1.00093e+07	1.11836e+07	32.79	1.37038e+07	1.36547e+07	17.27	0.73	-0.45	0.00699301	2.16	0.0487438	1.01346	224.998	84.5	1.4	Down
M226T315	289813	244380	325660	301926	394475	265086	340993	268890	774339	387443	663003	491889	679433	693434	510409	671008	608870	667006	21.39	303903	295870	15.99	2	1	0.0003108	3.51	0.00655521	2.06542	226.083	314.7	5.2	Up
M226T323	44531.9	166632	100157	177302	34820.5	97216.4	28796.4	63741.4	93595.2	687093	491461	69645.8	266149	363883	547898	419524	367406	391703	58.81	89149.7	80478.9	64.56	4.12	2.04	0.0104118	1.98	0.0628046	1.58312	226.083	323.4	5.4	Up
M226T439	24434.3	34315.5	20348.5	25633	22995.1	20805.6	34820.4	15934.5	26663.1	16610.3	45631	59882	60511.1	28759.1	39180.3	33832.9	38883.7	36506.6	40.4	24910.9	23714.7	26.68	1.56	0.64	0.0498834	1.3	0.173853	1.20046	226.036	439.2	7.3	Up
M226T448	9424.02	16419.4	3926.21	31700.2	90734.6	39368.2	4310.47	5505.82	139812	135170	50334.6	11892.5	115878	15715.1	35395.3	148821	81627.3	83106.5	72.13	25173.6	12921.7	117.65	3.24	1.7	0.0281274	1.55	0.119973	1.25565	226.072	448.1	7.5	Up
M226T565	13586.3	27106	17667.1	89088.1	52336.3	16414.2	30091	84867.3	27548.1	270363	100282	25204.4	82518.3	111333	105082	144191	108315	102682	71.28	41394.5	28598.5	74.05	2.62	1.39	0.0281274	1.55	0.119973	1.31103	226.145	564.7	9.4	Up
M226T723	625305	832538	734609	637200	168361	642319	434560	504088	254019	42818.4	216798	303499	298933	175508	246340	296896	229351	250179	38.17	572372	631252	35.73	0.4	-1.32	0.00699301	2.16	0.0487438	1.52694	225.796	722.5	12	Down
M226T90_1	520296	490803	540695	461007	503749	475986	508775	553324	448356	382544	495733	504002	388204	437515	361782	413429	428946	425472	12.18	506829	506262	6.15	0.85	-0.24	0.00699301	2.16	0.0487438	1.55338	226.012	90.3	1.5	Down
M227T393	114843	63801.4	92324.9	126138	114112	93977.2	87923.8	95922.1	124137	192278	146211	99081.8	146836	145512	149140	214111	152163	146524	23.78	98630.3	94949.6	19.75	1.54	0.63	0.0018648	2.73	0.0213197	1.68719	227.045	393	6.6	Up
M227T532	1.74541e+06	7.95403e+06	1.54028e+06	2.26961e+06	1.64624e+06	907084	1.03698e+06	1.62683e+06	844985	1.14484e+06	1.50726e+06	471647	178502	703697	555368	2.64962e+06	1.00699e+06	774341	77.49	2.34081e+06	1.63654e+06	98.56	0.43	-1.22	0.0281274	1.55	0.119973	1.21198	227.129	531.7	8.9	Down
M227T69	1.50173e+06	817640	894970	866170	1.08602e+06	630506	386912	892036	410266	259176	292536	637977	327735	539224	304587	776307	443476	369001	42.47	884498	879103	36.73	0.5	-1	0.004662	2.33	0.0380456	1.58569	226.987	69.3	1.2	Down
M227T762	2.77368e+06	4.32521e+06	3.49783e+06	5.0021e+06	2.05792e+06	1.46871e+06	3.53142e+06	2.08585e+06	5.42821e+06	4.96624e+06	5.39144e+06	4.33115e+06	4.29555e+06	5.77529e+06	4.95599e+06	1.58035e+06	4.59053e+06	4.96112e+06	28.8	3.09284e+06	3.13576e+06	39.31	1.48	0.57	0.0379176	1.42	0.147066	1.09077	227.165	761.9	12.7	Up
M227T90_1	1.17823e+06	1.94432e+06	1.05154e+06	1.14253e+06	1.17684e+06	788424	1.21768e+06	1.00555e+06	703498	344009	968406	906111	481461	474256	484605	410213	596570	483033	39.3	1.18814e+06	1.15968e+06	28.22	0.5	-0.99	0.000621601	3.21	0.0104451	1.75739	226.966	89.9	1.5	Down
M228T256	146994	304465	41195.7	275374	228299	80702.5	194700	171249	32790.7	27015.2	110946	132807	128279	14841.4	28303.8	64094.6	67384.7	48442.7	73.16	180372	182974	50.22	0.37	-1.42	0.00699301	2.16	0.0487438	1.38741	228.045	255.9	4.3	Down
M228T31	18999.6	17935.8	20230.7	18730.9	18873.7	24728.5	17712.4	22282.6	18801.3	34413.7	23339	20560.7	22478.4	57874.9	88096.6	48459.4	39253	28876.4	61.98	19936.8	18936.7	12.13	1.97	0.98	0.014763	1.83	0.078691	1.3116	227.96	31.2	0.5	Up
M228T363	360990	371963	354617	360971	311882	322581	334241	426146	939239	770473	1.23956e+06	721029	1.0625e+06	485239	865869	906970	873860	886419	25.95	355424	357794	9.95	2.46	1.3	0.0001554	3.81	0.00449411	2.14895	228	363.1	6.1	Up
M228T419	56148.9	94446.5	68106.7	152534	14228.5	42968.2	95870.8	123838	124965	116880	153552	160232	153596	147156	175460	162433	149284	153574	13.06	81017.7	81276.6	55.28	1.84	0.88	0.0018648	2.73	0.0213197	1.46925	228.025	418.7	7	Up
M228T457	25284.1	53995.2	27376.7	34046	11548.1	13368.3	16137.9	7356.09	15256.7	169166	98596.2	84439.1	62549.7	93230.9	80242.2	147343	93853.1	88835	50.92	23639.1	20711	64.35	3.97	1.99	0.0029526	2.53	0.0288032	1.68768	228.088	457	7.6	Up
M228T483	75651.2	534826	219724	266414	251761	39617.2	67068.2	46381	357051	2.74815e+06	941674	283952	332179	588543	979425	765961	874617	677252	91.98	187680	147688	90.25	4.66	2.22	0.0010878	2.96	0.0151734	1.66263	228.132	482.7	8	Up
M229T108	3.649e+07	5.60862e+07	2.64116e+07	6.86829e+07	2.37846e+07	2.63332e+07	2.04272e+07	4.15108e+07	2.50876e+07	1.12011e+07	2.21278e+07	1.7528e+07	2.78848e+07	1.1551e+07	1.49343e+07	1.23935e+07	1.78385e+07	1.62311e+07	36.31	3.74658e+07	3.14508e+07	45.81	0.48	-1.07	0.00699301	2.16	0.0487438	1.60329	228.994	107.6	1.8	Down
M229T212	29499.2	41465.6	89316.7	51590.1	68691.8	25905.5	39079.3	49559.5	88046.6	106115	144803	82839.7	67539.9	48698.8	66866.6	65742.6	83831.5	75189.8	35.92	49388.5	45512.6	42.53	1.7	0.76	0.0379176	1.42	0.147066	1.51742	229.055	212.4	3.5	Up
M229T304	295584	277361	215816	242244	245176	197680	366687	220707	202982	60447.3	127530	180706	160271	28741	11348.6	40327.2	101544	93988.4	74.03	257657	243710	21.17	0.39	-1.34	0.0003108	3.51	0.00655521	1.55273	229.119	303.8	5.1	Down
M229T374	160285	184272	142473	198335	10725.9	180731	206392	59439.4	36611.9	4297.86	156500	154213	107838	805.01	6261.96	3202.77	58716.3	21436.9	118.22	142832	170508	49.5	0.41	-1.28	0.014763	1.83	0.078691	1.19477	229.108	374.1	6.2	Down
M229T527	10404	4120.8	22671.3	31212.9	44983.8	8899.02	21569.8	2586.09	142355	267081	181592	39216.8	123397	68005.5	233060	172534	153405	157444	50.36	18306	15986.9	80.16	8.38	3.07	0.0003108	3.51	0.00655521	1.95771	229.098	527.2	8.8	Up
M229T529	1.49837e+06	1.32587e+06	1.43047e+06	1.66025e+06	1.33217e+06	1.34321e+06	1.44268e+06	1.31604e+06	1.58904e+06	1.41001e+06	1.69791e+06	1.61096e+06	1.37493e+06	1.97135e+06	2.14089e+06	1.58354e+06	1.67233e+06	1.6e+06	15.75	1.41863e+06	1.38684e+06	8.33	1.18	0.24	0.0281274	1.55	0.119973	1.34331	229.144	529.3	8.8	Up
M229T654	538966	592294	583202	694914	567634	553686	462101	452774	366135	354244	533168	553790	516129	514015	414794	367249	452440	464405	18.75	555696	560660	13.82	0.81	-0.3	0.0206682	1.68	0.0984557	1.31959	229.144	654.4	10.9	Down
M229T766	4.01207e+07	2.13222e+07	3.54659e+07	3.11541e+07	8.6737e+07	6.35338e+07	6.18631e+07	2.31363e+07	1.86574e+08	7.92366e+08	2.30586e+08	4.9626e+07	1.62579e+08	8.37154e+07	1.17345e+08	1.54638e+08	2.22179e+08	1.58608e+08	106.85	4.54166e+07	3.77933e+07	50.71	4.89	2.29	0.0018648	2.73	0.0213197	1.70459	228.993	766	12.8	Up
M229T81_2	2.11686e+06	1.16417e+06	1.74557e+06	1.14643e+06	180840	1.05489e+06	1.34593e+06	147963	176808	163010	97171	514482	559131	183021	166390	599177	307399	179915	68.33	1.11283e+06	1.1553e+06	61.41	0.28	-1.86	0.0281274	1.55	0.119973	1.37809	229.067	80.5	1.3	Down
M229T83_1	4.20955e+06	5.26569e+06	3.40584e+06	6.20735e+06	2.70432e+06	2.06486e+06	738871	6.73111e+06	1.21718e+06	297018	1.83186e+06	1.26292e+06	591219	3.44035e+06	1.08498e+06	378364	1.26299e+06	1.15108e+06	80.66	3.91595e+06	3.8077e+06	53.16	0.32	-1.63	0.0104118	1.98	0.0628046	1.5077	228.813	82.6	1.4	Down
M230T108_2	193725	180509	596732	197641	179333	317952	149648	149648	920530	148246	1.12249e+06	581326	955082	639242	1.06787e+06	1.15292e+06	823464	937806	41.89	245649	187117	61.65	3.35	1.75	0.014763	1.83	0.078691	1.71995	230.052	107.7	1.8	Up
M230T157	29592.2	29612.4	23451.9	31163.5	26062	22846.8	27478.8	37607.3	45575.6	58829.8	45273.3	28278.2	25177.2	50287.6	60748.2	51982.5	45769.1	47931.6	28.42	28476.9	28535.5	16.62	1.61	0.68	0.0206682	1.68	0.0984557	1.59244	229.937	156.9	2.6	Up
M230T375_1	405312	310308	425603	376127	412472	498602	578935	506000	235024	200164	64385.3	351198	319368	169885	55205.5	27817.2	177881	185024	68.63	439170	419037	19.27	0.41	-1.3	0.000621601	3.21	0.0104451	1.63513	230.061	374.5	6.2	Down
M230T383	199141	189156	261760	192577	137441	100154	246183	259955	83462.5	26502.3	65409.1	299590	83067.9	58264.4	5506.57	26718.9	81065.2	61836.7	114.37	198296	195859	29.27	0.41	-1.29	0.0104118	1.98	0.0628046	1.485	230.049	383.4	6.4	Down
M230T69_1	131602	111622	123064	168337	142963	150742	134202	147399	121963	996116	658891	560382	722125	125925	320268	1.00226e+06	563491	609637	62.19	138741	138582	12.68	4.06	2.02	0.0498834	1.3	0.173853	1.67962	229.937	68.5	1.1	Up
M230T78	868266	220043	2.04683e+06	827116	1.29142e+06	154513	130952	298021	1.26249e+07	1.22231e+07	1.38217e+07	6.89431e+06	8.08365e+06	6.32706e+06	6.78832e+06	1.09419e+07	9.71312e+06	9.51275e+06	31.08	729645	562569	92.87	13.31	3.73	0.0001554	3.81	0.00449411	2.12374	230.018	77.7	1.3	Up
M231T125	324628	262036	148461	283392	339953	120737	149254	279689	105475	118984	130508	141216	105859	164869	173380	123580	132984	127044	19.06	238519	270863	36.11	0.56	-0.84	0.014763	1.83	0.078691	1.52283	231.135	125.4	2.1	Down
M231T374_1	856547	69531.7	464919	264444	350775	35461.2	447669	265474	1.03229e+06	308881	495727	719953	535397	625231	431436	954297	637902	580314	39.49	344353	308125	75.34	1.85	0.89	0.0281274	1.55	0.119973	1.32367	231.124	374.2	6.2	Up
M231T532	358616	354112	624762	476524	788818	91992.9	911306	754322	263181	82454.1	385239	355838	79874.5	305925	272100	92662.3	229659	267641	55.01	545057	550643	50.24	0.42	-1.25	0.014763	1.83	0.078691	1.16421	231.16	531.8	8.9	Down
M231T56	321672	285296	340594	213899	219838	135027	143020	351472	375298	308986	368805	391296	437511	349241	346817	225847	350475	359023	17.87	251352	252567	34.21	1.39	0.48	0.014763	1.83	0.078691	1.3247	230.766	55.7	0.9	Up
M231T590	1.78406e+06	4.2894e+06	3.5969e+06	2.41983e+06	1.56699e+06	1.38179e+06	3.07012e+06	1.85302e+06	2.91142e+06	9.14442e+06	8.12349e+06	2.42558e+06	6.27101e+06	5.17589e+06	8.70652e+06	6.42795e+06	6.14828e+06	6.34948e+06	41.15	2.49526e+06	2.13642e+06	42.27	2.46	1.3	0.004662	2.33	0.0380456	1.69916	231.16	590.4	9.8	Up
M231T656	174669	554914	148663	196790	105238	109130	113708	163343	74163.6	80356	66372.1	146912	38611.5	35923.9	49677.4	57435.4	68681.5	61903.8	51.5	195807	156003	76.03	0.35	-1.51	0.0010878	2.96	0.0151734	1.70252	231.106	655.8	10.9	Down
M232T297	67795.8	127622	69303.5	81702.4	46058.7	74251.6	71425	84374.6	34804.5	13729.5	16095	73471.1	54372.2	71040.1	7740.02	53357.2	40576.2	44080.8	64.5	77816.7	72838.3	29.84	0.52	-0.94	0.014763	1.83	0.078691	1.42408	232.119	296.8	4.9	Down
M232T301	8.22951e+06	8.39558e+06	1.14924e+07	4.99829e+06	4.67981e+06	9.68533e+06	1.20884e+07	3.33825e+06	1.01203e+07	2.88828e+07	2.17704e+07	1.58907e+07	1.37398e+07	1.30946e+07	1.32624e+07	1.79386e+07	1.68375e+07	1.48153e+07	35.71	7.86345e+06	8.31255e+06	41.23	2.14	1.1	0.000621601	3.21	0.0104451	1.68205	232.028	301.2	5	Up
M232T315	794272	1.18329e+06	160247	156277	2.64751e+06	22141.6	921020	147111	2.98966e+06	1.61817e+06	3.41627e+06	2.47945e+06	1.45994e+06	129035	4.97297e+06	1.48192e+06	2.31843e+06	2.04881e+06	64.08	753983	477260	116.63	3.07	1.62	0.0281274	1.55	0.119973	1.30015	232.028	315.4	5.3	Up
M232T419	102024	104861	120512	129731	122489	77710	163402	142485	125601	147034	153074	215338	119978	192760	222137	254242	178771	172917	27.62	120402	121501	21.82	1.48	0.57	0.0206682	1.68	0.0984557	1.52502	232.065	419	7	Up
M232T69_1	8.15477e+06	1.0415e+07	8.49513e+06	8.78407e+06	9.09025e+06	8.33152e+06	9.04784e+06	9.33648e+06	9.72174e+06	1.02558e+07	1.10991e+07	9.91034e+06	8.95078e+06	1.04344e+07	9.59874e+06	9.10421e+06	9.88438e+06	9.81604e+06	7.16	8.95688e+06	8.91595e+06	7.98	1.1	0.14	0.0206682	1.68	0.0984557	1.33982	231.93	68.7	1.1	Up
M233T112	254642	348122	309724	312273	318184	145526	287142	310823	123808	71214.3	195163	239702	172858	77559.5	73183.7	75868.4	128670	100684	51.31	285804	310274	21.92	0.45	-1.15	0.0010878	2.96	0.0151734	1.70695	233.114	111.8	1.9	Down
M233T299	65823.1	177394	49337.5	197806	76657.4	75833.9	76257	49936	62114.8	21881.2	123313	68512.4	51708.8	24934	34023.9	44219.9	53838.6	47964.4	60.62	96130.6	76045.4	60.11	0.56	-0.84	0.0498834	1.3	0.173853	1.14826	233.056	298.8	5	Down
M233T303	2.66113e+06	3.3255e+06	3.56792e+06	2.71051e+06	2.85135e+06	2.33387e+06	3.00763e+06	3.87484e+06	1.95815e+06	1.65554e+06	259058	135503	467320	3.38012e+06	2.55193e+06	1.98704e+06	1.54933e+06	1.80685e+06	75.43	3.04159e+06	2.92949e+06	16.88	0.51	-0.97	0.00699301	2.16	0.0487438	1.3544	232.932	303.2	5.1	Down
M233T518	41691.8	4810.47	48170.7	15249.9	175834	11700	41912.1	14014.9	2.42208e+06	3.16943e+06	1.98995e+06	68273.5	1.14465e+06	780095	2.08954e+06	976237	1.58003e+06	1.5673e+06	63.93	44172.9	28470.8	126.08	35.77	5.16	0.0003108	3.51	0.00655521	2.03973	233.105	518.5	8.6	Up
M233T529	1.56661e+06	2.9561e+06	1.88384e+06	1.44561e+06	1.22483e+06	1.1949e+06	1.08554e+06	2.0667e+06	1.08564e+06	627430	902089	1.03096e+06	874871	795956	717126	878560	864078	876715	17.55	1.67802e+06	1.50611e+06	36.9	0.51	-0.96	0.0003108	3.51	0.00655521	1.80963	233.118	528.6	8.8	Down
M233T732	1.02892e+06	1.02142e+06	1.08502e+06	1.02599e+06	709742	724038	1.39087e+06	862728	569502	333722	397871	569003	646390	675892	113641	564868	483861	566935	39.17	981090	1.02371e+06	22.41	0.49	-1.02	0.0001554	3.81	0.00449411	1.59961	232.932	732.1	12.2	Down
M233T809	1.06446e+06	1.26404e+06	2.272e+06	1.58891e+06	2.74583e+06	1.33144e+06	2.57603e+06	1.35332e+06	3.34691e+06	2.7621e+06	4.02633e+06	3.95042e+06	1.73474e+06	1.91735e+06	3.71888e+06	3.01298e+06	3.05871e+06	3.17994e+06	28.7	1.7745e+06	1.47111e+06	36.93	1.72	0.79	0.004662	2.33	0.0380456	1.59648	233.155	809.2	13.5	Up
M234T100	7966.11	9178.37	8044.36	12681.6	24555.8	6799.51	15569.3	20497.7	24316.8	16204.5	22232.8	28173.3	21742.5	21114.7	21136	23619.1	22317.5	21987.6	15.2	13161.6	10930	49.67	1.7	0.76	0.0104118	1.98	0.0628046	1.63793	234.081	100.1	1.7	Up
M234T154	1.5859e+06	2.17212e+06	2.44961e+06	2.01419e+06	1.77582e+06	2.12787e+06	1.76851e+06	2.28124e+06	3.5486e+06	1.50104e+07	4.23237e+06	2.81263e+06	5.15441e+06	8.98777e+06	1.02942e+07	6.66251e+06	7.08786e+06	5.90846e+06	58.3	2.02191e+06	2.07103e+06	14.47	3.51	1.81	0.0001554	3.81	0.00449411	1.87943	234.044	153.6	2.6	Up
M234T303	89174.1	63869	11957.1	34795.5	12583.6	60904.5	15046.7	5851.16	143946	113347	690901	328241	106852	104715	18360	171023	209673	128646	101.8	36772.7	24921.1	84.1	5.7	2.51	0.0018648	2.73	0.0213197	1.51821	233.93	302.9	5	Up
M234T370	6230.25	20863.5	6196.41	6890.72	3537.34	3296.75	5954.53	6240.24	13435.6	11847.4	17213.4	12602.6	12566.8	13867.1	18896.7	11940.9	14046.3	13019.1	18.55	7401.22	6213.33	75.67	1.9	0.92	0.0104118	1.98	0.0628046	1.66046	234.053	370.4	6.2	Up
M234T374_1	166469	383595	238614	547252	298105	109133	37578.7	295931	464802	724273	611636	291176	553078	375942	411067	822222	531774	508940	34.05	259585	267272	62.11	2.05	1.03	0.0104118	1.98	0.0628046	1.39323	233.93	374	6.2	Up
M234T374_2	97262.8	34868.1	324433	105340	102481	63821	236985	190762	430480	1.46321e+06	555257	1.47996e+06	244419	512527	678632	1.09601e+06	807562	616944	59.05	144494	103910	67.77	5.59	2.48	0.0003108	3.51	0.00655521	1.93974	234.009	374.2	6.2	Up
M234T389	43899.5	50794.4	68695.9	28883.6	70355.9	59622.9	56647.4	29909.4	26376.5	24531.7	42718.8	48595.2	27931.5	52242	46656.1	20483.4	36191.9	35325.2	34.81	51101.1	53720.9	31.19	0.71	-0.5	0.0379176	1.42	0.147066	1.1048	234.044	388.6	6.5	Down
M234T93	2.33327e+06	2.43161e+06	2.18838e+06	2.88677e+06	2.27743e+06	2.00498e+06	2.48715e+06	2.12878e+06	2.66323e+06	1.90706e+06	2.69564e+06	3.48615e+06	2.84152e+06	3.34649e+06	3.27699e+06	2.7425e+06	2.86995e+06	2.79201e+06	17.62	2.34229e+06	2.30535e+06	11.55	1.23	0.29	0.0379176	1.42	0.147066	1.29694	234.098	92.9	1.5	Up
M235T109	5.66146e+06	2.98698e+06	7.33077e+06	1.82338e+06	6.03839e+06	4.57435e+06	6.91088e+06	2.17383e+06	2.08666e+06	1.05414e+06	1.23943e+06	4.28474e+06	3.34443e+06	4.03144e+06	1.43297e+06	2.5075e+06	2.49767e+06	2.29708e+06	50.72	4.68751e+06	5.1179e+06	45.71	0.53	-0.91	0.0379176	1.42	0.147066	1.24883	235.039	109	1.8	Down
M235T122_1	784717	578051	1.03598e+06	618715	773663	312385	836373	242256	1.09246e+06	950843	1.43499e+06	903839	1.44939e+06	916766	1.89393e+06	1.06223e+06	1.21306e+06	1.07735e+06	28.86	647767	696189	41.4	1.87	0.91	0.0010878	2.96	0.0151734	1.63102	234.956	122.2	2	Up
M235T324	15582.8	24451.3	15788.1	196922	18283.5	13300.5	34202.7	35116.7	27020.2	560496	52237.3	16428.6	47984.7	635360	517097	359117	276968	205677	97.12	44206	21367.4	140.88	6.27	2.65	0.0206682	1.68	0.0984557	1.28065	235.073	323.9	5.4	Up
M235T327	90388.9	56420.2	85720.1	87932.9	91013	124183	88470.4	87035.9	129874	355577	170059	129161	125624	119323	165223	119141	164248	129518	48.6	88895.6	88201.6	20.48	1.85	0.89	0.000621601	3.21	0.0104451	1.63112	235.109	326.7	5.4	Up
M235T565	299677	691960	673975	419079	244947	189978	518773	565147	207978	81629.2	122969	210656	274019	161854	176181	103591	167360	169017	38.06	450442	468926	42.78	0.37	-1.43	0.0018648	2.73	0.0213197	1.72528	235.134	564.8	9.4	Down
M235T659	185271	347312	121218	258781	202172	136643	170372	94426.8	114190	76025.8	167810	139174	113933	102090	93426.1	171428	122260	114061	28.15	189524	177821	43.12	0.65	-0.63	0.0498834	1.3	0.173853	1.18225	235.17	659.3	11	Down
M235T86	1.3824e+06	720819	1.63954e+06	211709	3.42308e+06	1.55419e+06	3.54296e+06	4.91654e+06	3.84408e+06	3.52855e+06	4.38253e+06	3.5734e+06	3.56018e+06	2.87917e+06	3.48472e+06	3.49343e+06	3.59326e+06	3.54437e+06	11.63	2.1739e+06	1.59686e+06	74.2	1.65	0.73	0.0498834	1.3	0.173853	1.26821	235.037	85.6	1.4	Up
M236T114	58977.7	74430.4	92624.3	87152.6	67156.1	79114.4	96932.8	84768.3	129029	191934	178898	86728.2	162889	280250	252088	272814	194329	185416	35.84	80144.6	81941.4	16.05	2.42	1.28	0.0010878	2.96	0.0151734	1.91406	236.06	113.8	1.9	Up
M236T152	291099	417556	279852	472221	741632	502795	408756	348489	763654	904677	835239	667892	508477	700505	1.40131e+06	652751	804313	732080	33.53	432800	413156	34.18	1.86	0.89	0.0018648	2.73	0.0213197	1.6814	236.023	151.9	2.5	Up
M236T290	163109	172546	207594	186809	735233	870437	687010	640486	137880	349641	153627	157787	131494	451376	164997	125115	208990	155707	58.39	457903	424040	65.9	0.46	-1.13	0.014763	1.83	0.078691	1.19329	236.06	289.7	4.8	Down
M236T327	411447	534723	1.24897e+06	1.59756e+06	1.14079e+06	1.12764e+06	406384	1.36454e+06	2.09472e+06	2.2135e+06	2.65759e+06	2.97144e+06	2.42263e+06	2.86971e+06	2.62325e+06	2.14646e+06	2.49991e+06	2.52294e+06	13.32	979006	1.13422e+06	47.28	2.55	1.35	0.0001554	3.81	0.00449411	1.8691	236.093	327.4	5.5	Up
M236T447	138215	110841	147178	116065	106279	84421.8	155263	119938	191015	436113	193860	161799	211100	130937	163683	117266	200722	177349	49.96	122275	118002	19.12	1.64	0.72	0.00699301	2.16	0.0487438	1.41122	236.058	447.3	7.5	Up
M236T560	231998	309872	339072	164782	193426	116207	266884	362189	657647	945238	343185	82437.2	538698	703417	951989	712015	616828	680532	47.66	248054	249441	35.09	2.49	1.31	0.014763	1.83	0.078691	1.29919	236.078	560.2	9.3	Up
M236T85	2.83971e+09	3.52264e+09	3.49917e+09	4.10709e+09	2.68825e+08	3.68355e+08	5.82626e+08	3.54146e+09	1.49394e+08	5.55742e+08	3.01005e+08	2.76202e+08	3.89027e+08	4.75955e+08	2.34799e+08	3.20128e+08	3.37781e+08	3.10567e+08	38.89	2.34124e+09	3.16944e+09	70.04	0.14	-2.79	0.014763	1.83	0.078691	1.58469	236.022	85.4	1.4	Down
M236T88	366656	198094	340015	463107	154457	424614	137714	690086	334684	1.02103e+06	967484	250242	1.00649e+06	1.42957e+06	1.42891e+06	980847	927407	993667	47.05	346843	353336	53.46	2.67	1.42	0.0206682	1.68	0.0984557	1.50083	236.077	87.8	1.5	Up
M237T103	198977	30108.1	251777	226757	154476	55417	14319.8	20129	276586	401499	354517	455266	401860	49139.1	147357	508314	324317	378008	48.5	118995	104947	83.78	2.73	1.45	0.014763	1.83	0.078691	1.35781	237.099	102.5	1.7	Up
M237T108	788758	434186	2.16895e+06	1.16763e+06	1.994e+06	307265	2.34399e+06	1.9426e+06	2.9545e+06	4.69004e+06	1.20357e+06	5.03778e+06	595634	3.02335e+06	2.15477e+06	4.59733e+06	3.03212e+06	2.98893e+06	54.73	1.39342e+06	1.55512e+06	58.7	2.18	1.12	0.0379176	1.42	0.147066	1.20269	237.037	107.6	1.8	Up
M237T121	4.09565e+06	286461	2.86059e+06	3.1041e+06	560236	3.08683e+06	1.74658e+06	6.0219e+06	35464.2	100817	1.15153e+06	7.73568e+06	103769	1.92732e+06	45249.8	196245	1.41201e+06	150007	187.36	2.72029e+06	2.97371e+06	68.96	0.52	-0.95	0.0498834	1.3	0.173853	1.22869	237.055	120.6	2	Down
M237T153	82427.1	133013	112349	19918.3	141768	150495	118638	119065	54741.6	14579.5	17089.8	26696.2	52246.2	81870.3	82676.6	15575.6	43184.5	39471.2	66.69	109709	118852	38.08	0.39	-1.35	0.004662	2.33	0.0380456	1.47678	236.984	152.7	2.5	Down
M237T302	119625	107265	129475	46673.9	123349	102846	118138	148494	220379	878422	252957	124786	247629	162164	313039	350128	318688	250293	74.58	111983	118882	26.65	2.85	1.51	0.000621601	3.21	0.0104451	1.66607	237.037	302.4	5	Up
M237T31	115737	137325	96948.4	170938	94180.3	92775.8	111365	24647.1	26948.4	8177.81	16302.2	63442.9	113551	65265.6	67023.5	90483.4	56399.4	64354.2	65.21	105490	104157	39.79	0.53	-0.9	0.0206682	1.68	0.0984557	1.15292	236.816	30.7	0.5	Down
M237T33	62642.3	40206.6	45091.2	50986	42584.4	44938.7	40927.6	50144.3	49232.9	157225	57964.3	61805.5	43492	167662	139635	147472	103061	100720	52.64	47190.1	45015	15.63	2.18	1.13	0.0206682	1.68	0.0984557	1.459	236.87	33.3	0.6	Up
M237T372	19796.8	32080.7	12877.8	14291.9	12693.3	5035.04	21340.5	21449.5	84783.3	893822	57207.3	18147.8	45694.2	1.06159e+06	1.0174e+06	1.05005e+06	528587	489303	97.03	17445.7	17044.4	46.38	30.3	4.92	0.0018648	2.73	0.0213197	1.71059	237.04	371.7	6.2	Up
M237T476	251745	135514	101832	108038	235632	218215	173544	148819	533913	962546	539693	443957	622597	464205	501375	637916	588275	536803	28.21	171667	161182	33.7	3.43	1.78	0.0001554	3.81	0.00449411	2.09955	237.113	475.7	7.9	Up
M237T574	91425.3	67849.6	96953.9	65846.5	86493.3	66470.6	123555	72722.8	221239	125493	162790	90459.6	135930	214645	106364	212170	158636	149360	32.78	83914.6	79608	23.91	1.89	0.92	0.0018648	2.73	0.0213197	1.76691	237.099	574	9.6	Up
M237T602	15295.1	60356.3	17257	147139	221756	15254.5	61805	21811.6	409080	590441	518750	106913	364330	137616	199482	711079	379711	386705	58.05	70084.3	41083.9	108.17	5.42	2.44	0.0029526	2.53	0.0288032	1.79787	237.113	602	10	Up
M237T692	545172	638544	501332	1.13913e+06	378007	311907	380950	211582	365171	104893	117912	157273	195991	164939	162305	357634	203265	163622	50.01	513328	441141	55.88	0.4	-1.34	0.0018648	2.73	0.0213197	1.6444	237.15	692.3	11.5	Down
M237T92	167417	132329	138450	36180.3	100911	98119.1	96991.1	109370	142642	112550	197083	141805	171035	187104	166669	291605	176312	168852	30.58	109971	105141	35.13	1.6	0.68	0.004662	2.33	0.0380456	1.36814	237.061	92.1	1.5	Up
M238T190	205349	177185	195796	197481	166251	165695	278864	205660	120840	22430.9	148638	217809	158630	168221	85963.3	135241	132222	141939	44.21	199035	196638	18.15	0.66	-0.59	0.014763	1.83	0.078691	1.11395	238.072	189.9	3.2	Down
M238T193	208064	207457	205475	206623	192876	155481	160523	196769	225428	212514	223890	189716	214387	230184	232162	209933	217277	219138	6.37	191658	201122	11.22	1.13	0.18	0.004662	2.33	0.0380456	1.39595	238.095	193.4	3.2	Up
M238T285	12780.6	54181.8	63288.8	96511.8	69711.8	12481.4	82087.6	61645.1	116196	258309	109728	95054	204436	172517	144482	268101	171103	158499	39.14	56586.1	62467	53.26	3.02	1.6	0.0003108	3.51	0.00655521	1.72404	238.001	285.1	4.8	Up
M238T31	58311.4	70910.7	57585.2	62026	54206.8	51469.3	59939.9	63102.5	43147.3	24696.4	44545.5	50240.6	37925.5	49216	35514	52580.6	42233.2	43846.4	21.87	59694	59125.7	9.95	0.71	-0.5	0.0003108	3.51	0.00655521	1.65338	237.916	31	0.5	Down
M238T404	72654	194678	84935.6	134816	114322	93702.3	40498.2	36290.3	41003.3	10336	52438.6	50892.2	33853.9	10145.6	7964.28	15041.6	27709.4	24447.7	68.53	96487.1	89319	53.85	0.29	-1.8	0.004662	2.33	0.0380456	1.69818	238.098	404.3	6.7	Down
M238T560	31204.5	27979	27890	25443.3	45281	30333.9	25183	25507	134242	68744.5	100914	73466.3	114507	94735.9	74738.4	100853	95275.1	97794.4	23.65	29852.7	27934.5	22.21	3.19	1.67	0.0001554	3.81	0.00449411	2.18431	238.073	560	9.3	Up
M238T574	65248.9	26516.8	40991.7	23459.9	33383.4	24160.6	12461.2	25888.4	73373.1	84651.2	71771.3	18080.4	118363	62675.1	124917	41107.8	74367.3	72572.2	48.26	31513.9	26202.6	50.46	2.36	1.24	0.014763	1.83	0.078691	1.44299	238.092	574	9.6	Up
M238T690	256816	2.74348e+06	122334	83359.8	141481	121807	132319	121805	4116.39	229439	70687.1	303689	4609.92	3018.39	65478.2	3836.67	85609.4	35044.1	136.5	465425	127327	198.07	0.18	-2.44	0.0498834	1.3	0.173853	1.35813	238.072	689.8	11.5	Down
M238T80_2	1.33074e+06	1.00452e+06	3.2294e+06	3.6556e+06	2.58935e+06	2.38338e+06	3.28638e+06	2.8672e+06	3.10853e+06	4.67317e+06	4.8711e+06	5.71926e+06	5.09798e+06	1.56494e+06	5.26855e+06	5.11895e+06	4.42781e+06	4.98454e+06	31.36	2.54332e+06	2.72827e+06	37.1	1.74	0.8	0.014763	1.83	0.078691	1.3784	238.039	80.5	1.3	Up
M239T252	194769	167451	109428	238976	242414	179543	317426	201894	537430	718031	737732	444617	489223	105732	517704	459502	501246	503464	38.89	206487	198331	29.79	2.43	1.28	0.0104118	1.98	0.0628046	1.59327	239.104	252.4	4.2	Up
M239T564	441688	550285	452701	255123	500130	582337	978849	492393	1.23846e+06	867734	687825	888000	524762	1.21375e+06	1.03616e+06	718411	896888	877867	28.31	531688	496261	38.69	1.69	0.75	0.00699301	2.16	0.0487438	1.49117	239.128	563.8	9.4	Up
M239T622	148391	389557	367992	129428	70334.4	265155	453624	358826	123988	21149.4	300656	138901	52260.1	42935.4	59953.4	383090	140367	91970.5	94.36	272913	311991	51.8	0.51	-0.96	0.0498834	1.3	0.173853	1.1056	239.165	622.3	10.4	Down
M240T103	786004	499058	686092	492794	899377	650186	967667	867249	1.01199e+06	890939	990551	1.00789e+06	883984	1.02811e+06	1.06426e+06	868515	968280	999221	7.79	731053	736048	24.53	1.32	0.41	0.004662	2.33	0.0380456	1.56674	240.118	102.8	1.7	Up
M240T109	859517	2.67395e+06	700791	1.54612e+06	4.08524e+06	5.63108e+06	503453	3.14498e+06	2.443e+06	3.32451e+06	3.74184e+06	3.58713e+06	4.82628e+06	6.92719e+06	6.34627e+06	6.58166e+06	4.72223e+06	4.28406e+06	36.12	2.39314e+06	2.11003e+06	76.56	1.97	0.98	0.0281274	1.55	0.119973	1.2758	240.018	108.6	1.8	Up
M240T110	240542	217564	252459	259087	168328	176770	235323	340424	494137	1.49442e+06	521931	287053	436509	1.1756e+06	1.20733e+06	1.06891e+06	835736	795419	53.84	236312	237932	22.71	3.54	1.82	0.0003108	3.51	0.00655521	1.86524	240.074	109.5	1.8	Up
M240T111	75904.1	67987.6	143392	130773	79056.5	136476	110471	131402	142286	139267	215750	196376	172258	175832	122400	305799	183746	174045	31.69	109433	120622	28.03	1.68	0.75	0.004662	2.33	0.0380456	1.61365	240.099	111.3	1.9	Up
M240T299	132009	166388	132809	284571	89102.8	99988.7	184206	255250	325097	274450	286704	357526	364175	244479	262028	373187	310956	305900	16.22	168041	149599	41.99	1.85	0.89	0.0018648	2.73	0.0213197	1.79345	240.088	299.2	5	Up
M240T34	119415	73031.1	111670	64208.8	88989.2	151159	91389.5	86418.2	91498.8	178875	180464	135767	160447	230510	227007	216792	177670	179670	27.11	98285.1	90189.4	28.51	1.81	0.85	0.0018648	2.73	0.0213197	1.67783	239.871	34.3	0.6	Up
M240T433	1.15403e+06	2.57367e+06	2.47251e+06	484364	2.58581e+06	1.75102e+06	426895	3.03481e+06	4.5208e+06	3.45049e+06	6.94953e+06	6.69254e+06	6.29871e+06	5.23981e+06	2.96589e+06	6.40839e+06	5.31577e+06	5.76926e+06	28.76	1.81039e+06	2.11177e+06	56.13	2.94	1.55	0.0003108	3.51	0.00655521	1.70694	240.043	432.6	7.2	Up
M240T57	66671.8	32316.7	81060.5	60906.2	79940.9	92453.5	55342.7	77064.4	78158	126962	99943.5	108354	80043.7	47770.7	98150.1	85947.3	90666.1	92048.7	26.05	68219.6	71868.1	27.58	1.33	0.41	0.0498834	1.3	0.173853	1.07425	239.871	56.8	0.9	Up
M240T601	444802	134795	133876	346151	236442	104199	150306	104211	1.17268e+06	2.2688e+06	2.97868e+06	1.65628e+06	987255	1.77811e+06	2.45877e+06	1.93422e+06	1.90435e+06	1.85616e+06	34.66	206848	142550	61.07	9.21	3.2	0.0001554	3.81	0.00449411	2.19183	239.99	601.2	10	Up
M240T651	105454	89893.1	86656.7	79533.6	109546	80121.7	116406	88051	229639	830393	831514	444931	202915	576950	585637	569098	533885	573024	44.34	94457.8	88972.1	14.87	5.65	2.5	0.0001554	3.81	0.00449411	2.13556	240.066	650.8	10.8	Up
M240T760	9.26841e+06	1.14686e+07	4.76203e+06	1.28879e+07	1.27253e+07	4.16738e+06	4.68362e+06	3.62481e+06	4.52829e+06	3.78684e+06	4.67415e+06	6.22463e+06	3.33266e+06	413515	1.29876e+06	4.94872e+06	3.65095e+06	4.15757e+06	53.05	7.9485e+06	7.01522e+06	51.03	0.46	-1.12	0.0498834	1.3	0.173853	1.22007	240.132	760	12.7	Down
M241T260	123471	252912	35270.6	486334	121369	112273	253565	366624	362145	402739	431284	410721	311564	371738	466128	530447	410845	406730	16.35	218977	188191	68.91	1.88	0.91	0.014763	1.83	0.078691	1.43049	240.871	259.8	4.3	Up
M241T33	357986	328422	352717	287673	348712	302748	340635	350414	393220	401074	436776	393493	355893	360778	359588	372252	384134	382736	7.17	333663	344673	7.69	1.15	0.2	0.0003108	3.51	0.00655521	1.71532	240.87	33.3	0.6	Up
M241T374	270290	280948	386223	252883	566865	384171	355802	342433	311176	269634	109870	350151	67942.9	339793	95862.3	73628.2	202257	189752	62.44	354952	349117	28.16	0.57	-0.81	0.0281274	1.55	0.119973	1.41813	241.108	373.8	6.2	Down
M241T433	120171	194755	85198	209024	91040.7	298413	35288.9	149167	362141	1.6796e+06	352452	145429	213764	651810	1.48398e+06	2.42655e+06	914465	506976	92.13	147882	134669	56.69	6.18	2.63	0.0029526	2.53	0.0288032	1.55927	241.047	432.5	7.2	Up
M241T605	43764.2	229638	335419	65027.8	65809.5	20919.7	1.7738e+06	1.06691e+06	1.17842e+06	1.42558e+06	1.64168e+08	1.34769e+06	1.30678e+06	98950.6	352965	336609	2.12768e+07	1.2426e+06	271.37	450161	147724	141.49	47.26	5.56	0.0379176	1.42	0.147066	1.24352	241.144	605.2	10.1	Up
M241T653	28943.3	33512.7	84153.5	29284.9	131818	41063.5	39165.1	20038	138260	618175	130870	74365.9	81533.2	538527	748010	670998	375092	338394	78.36	50997.3	36338.9	74.45	7.36	2.88	0.0029526	2.53	0.0288032	1.74424	241.087	652.9	10.9	Up
M241T661	335470	161141	171948	14871.7	421200	204590	240068	147122	174231	56204.8	52710.8	52998.5	22501.2	166763	30024.5	46620.2	75256.7	52854.7	79.7	212051	188269	58.33	0.35	-1.49	0.0498834	1.3	0.173853	1.21934	241.05	661.2	11	Down
M241T666	157520	350302	242307	314179	117383	146328	140000	241524	380297	517086	158091	154187	635608	1.49945e+06	1.06738e+06	1.69282e+06	763115	576347	77.67	213693	199522	40.62	3.57	1.84	0.014763	1.83	0.078691	1.36913	241.144	666	11.1	Up
M241T759	1.10099e+07	4.96493e+06	8.56732e+06	1.38604e+07	1.02595e+07	8.30046e+06	9.1997e+06	1.29542e+07	1.98364e+07	2.59493e+07	9.19809e+06	2.43218e+07	2.08837e+07	2.15991e+07	2.63492e+07	2.9035e+07	2.21466e+07	2.29604e+07	27.48	9.88955e+06	9.72959e+06	28.49	2.24	1.16	0.0029526	2.53	0.0288032	1.82025	241.056	758.6	12.6	Up
M242T122	1.17306e+08	1.73976e+08	7.61019e+07	1.33695e+08	9.5289e+07	1.18706e+08	1.45297e+08	1.01218e+08	7.88172e+07	2.83234e+07	7.84485e+07	1.2441e+08	4.80615e+07	3.343e+07	4.42182e+07	3.91355e+07	5.93556e+07	4.61398e+07	54.69	1.20199e+08	1.18006e+08	25.62	0.49	-1.02	0.00699301	2.16	0.0487438	1.68316	242.077	121.9	2	Down
M242T320	71234.2	87283.1	274906	175551	155558	107706	482077	284948	816235	1.16478e+06	993412	991284	1.03573e+06	683579	809997	1.1614e+06	957054	992348	18.09	204908	165554	67.16	4.67	2.22	0.0001554	3.81	0.00449411	2.10142	242.086	319.8	5.3	Up
M242T328	205332	133609	174831	139155	140445	84272.7	148125	148687	214734	196443	190433	249405	194568	226561	150241	242984	208171	205588	15.5	146807	144285	23.6	1.42	0.5	0.0029526	2.53	0.0288032	1.62976	242.067	328.2	5.5	Up
M242T433	1.22267e+06	353770	1.03351e+06	1.48193e+06	1.02496e+06	1.22052e+06	1.31286e+06	1.01424e+06	1.15409e+06	1.51353e+06	1.52329e+06	1.66477e+06	1.5439e+06	1.27465e+06	1.10909e+06	1.78056e+06	1.44548e+06	1.51841e+06	16.7	1.08306e+06	1.12702e+06	31.07	1.33	0.42	0.0206682	1.68	0.0984557	1.16915	242.04	432.6	7.2	Up
M242T449	188871	68166.6	151127	20255.3	170998	133432	201837	103257	27276.6	3591	341.684	31045.2	42940.9	73044.4	718.24	33176.6	26516.8	29160.9	94.29	129743	142279	48.18	0.2	-2.29	0.004662	2.33	0.0380456	1.53224	242.082	448.5	7.5	Down
M242T536	15032.2	31933.4	62915.8	45882.5	58573.6	9186.26	70869.4	15813.4	10995.7	7834.86	12934.5	7530.02	37175.3	6478.95	5132.81	29862.9	14743.1	9415.26	81.46	38775.8	38907.9	62.17	0.38	-1.4	0.014763	1.83	0.078691	1.26587	241.997	536	8.9	Down
M242T591_1	184296	234575	389719	222572	531829	177677	281124	397579	557396	1.37284e+06	439251	367841	476008	244381	354135	603067	551865	457630	63.61	302421	257850	41.5	1.82	0.87	0.0379176	1.42	0.147066	1.28817	242.085	591.3	9.9	Up
M242T741	232930	482488	525193	354737	369410	221742	575919	454097	1.08643e+06	342866	625883	465322	501602	485228	700983	1.12514e+06	666682	563743	43.72	402065	411754	32.43	1.66	0.73	0.0498834	1.3	0.173853	1.33984	242.18	740.8	12.3	Up
M242T759	276798	318345	669598	295816	476468	733290	855072	286538	1.75384e+06	4.85379e+06	1.79834e+06	1.02379e+06	1.94839e+06	2.00264e+06	2.24929e+06	1.5868e+06	2.15211e+06	1.87337e+06	53.41	488991	397406	47.58	4.4	2.14	0.0001554	3.81	0.00449411	2.00033	242.056	758.6	12.6	Up
M242T90_2	6.50928e+06	6.59117e+06	4.81725e+06	5.93126e+06	4.43465e+06	4.02507e+06	4.29912e+06	3.8996e+06	4.40536e+06	1.81153e+06	5.10006e+06	3.64697e+06	4.44246e+06	2.46322e+06	2.32837e+06	3.31567e+06	3.4392e+06	3.48132e+06	34.04	5.06342e+06	4.62595e+06	21.95	0.68	-0.56	0.0379176	1.42	0.147066	1.35934	242.067	89.8	1.5	Down
M243T126	85453.8	137786	92694.9	171668	80866.3	198192	87530.3	108010	142670	489871	259130	83445.3	175043	298562	397719	451943	287298	278846	52.02	120275	100352	36.87	2.39	1.26	0.0206682	1.68	0.0984557	1.44132	243.135	126.1	2.1	Up
M243T362	34021.7	144610	107319	185290	205795	139010	89478.4	36401.1	161264	445429	181409	163959	40167.6	659568	641781	537695	353909	313419	69.2	117741	123164	53.74	3.01	1.59	0.0379176	1.42	0.147066	1.16247	243.044	362.2	6	Up
M243T480	60783.1	40952.4	105271	122736	43022	44220.4	124075	108564	237683	304409	178150	193719	235919	158315	119534	335178	220364	214819	33.12	81203.1	83027.2	45.97	2.71	1.44	0.000621601	3.21	0.0104451	1.903	242.989	480	8	Up
M243T533	107616	111415	261620	128168	97960.7	83013.5	91142.1	152419	125695	284303	361279	161132	526677	107190	366325	402674	291909	322791	51.25	129169	109515	44.78	2.26	1.18	0.014763	1.83	0.078691	1.52971	243.088	533.4	8.9	Up
M243T545	41251.6	143680	93901	619492	204012	20137	69145.9	140845	526710	1.06661e+06	594766	140643	575843	555993	453791	1.45538e+06	671217	565918	60.36	166558	117373	115.63	4.03	2.01	0.014763	1.83	0.078691	1.69682	243.114	544.8	9.1	Up
M243T551	36454.5	1530.48	4737.98	21303.9	3518.74	46530.8	3071.27	155767	61390.1	103474	206191	67887.4	176977	165980	195253	78944.2	132012	134727	45.64	34114.3	13021	152.51	3.87	1.95	0.0018648	2.73	0.0213197	1.66026	243.124	551.3	9.2	Up
M243T768	3.40998e+06	1.76651e+06	2.26149e+06	1.45354e+06	1.99229e+06	1.72679e+06	2.00333e+06	1.46888e+06	2.25264e+06	443530	1.42405e+06	1.30729e+06	507197	671760	720458	952129	1.03488e+06	836294	58.6	2.01035e+06	1.8794e+06	31.27	0.51	-0.96	0.004662	2.33	0.0380456	1.5485	243.187	768.3	12.8	Down
M243T90	121198	76289.8	65951.5	57854.3	64966.5	46543.9	42555.3	62159	203238	204863	236026	231753	206736	281470	226347	303374	236726	229050	15.65	67189.8	63562.8	36.25	3.52	1.82	0.0001554	3.81	0.00449411	2.18889	243.017	90.3	1.5	Up
M244T107	2.6895e+07	6.33057e+07	2.4965e+07	4.59714e+07	4.2395e+07	9.76483e+06	2.94658e+07	3.16993e+07	1.13067e+07	728877	1.89301e+07	3.4567e+07	1.31314e+07	371322	736816	6.47371e+06	1.07807e+07	8.89019e+06	109.01	3.43078e+07	3.05825e+07	46.96	0.31	-1.67	0.0104118	1.98	0.0628046	1.40715	244.094	107.4	1.8	Down
M244T117	146524	17795	159444	102022	167355	148783	141936	38543.6	178099	185430	207445	275926	271834	179376	200817	283812	222842	204131	20.74	115300	144230	49.76	1.93	0.95	0.0001554	3.81	0.00449411	1.43779	244.166	117.2	2	Up
M244T122_1	800151	1.01347e+06	1.11527e+06	1.14598e+06	953221	981257	822859	1.22704e+06	951411	1.21602e+06	1.39661e+06	1.9502e+06	1.13911e+06	1.31152e+06	1.19247e+06	2.16646e+06	1.41548e+06	1.26377e+06	29.76	1.00741e+06	997363	15	1.41	0.49	0.0206682	1.68	0.0984557	1.41323	244.082	121.7	2	Up
M244T303	139487	150364	126471	128759	208433	139913	140383	138450	109095	228263	162832	169169	189609	494210	491052	323808	271005	208936	55.4	146532	139700	17.8	1.85	0.89	0.0281274	1.55	0.119973	1.25821	244.065	302.6	5	Up
M244T31_1	149793	487547	241878	934356	206583	234565	167198	395386	633491	853958	989930	398322	553445	554737	766393	498378	656082	594114	30.23	352163	238221	74.47	1.86	0.9	0.0104118	1.98	0.0628046	1.49623	243.894	31.1	0.5	Up
M244T31_2	62476.2	66573	67708.9	68433	64570.4	63890	60417.8	65656.4	69615.1	65700.9	78523.5	87208.4	63732	74983.8	76553.5	68192.1	73063.7	72299.5	10.64	64965.7	65113.4	4.15	1.12	0.17	0.0206682	1.68	0.0984557	1.41715	243.931	31.5	0.5	Up
M244T337	22392.3	328015	16958.3	31086.6	248192	36136	232089	60723.2	62346.1	284373	279044	224440	273980	476169	570234	332618	312900	281708	49.41	121949	48429.6	103.18	2.57	1.36	0.014763	1.83	0.078691	1.39022	244.028	336.8	5.6	Up
M244T364	2.23703e+06	2.31509e+06	2.34956e+06	2.42295e+06	1.99029e+06	2.00588e+06	2.25696e+06	2.43023e+06	3.06764e+06	2.62492e+06	2.29441e+06	2.91653e+06	3.32168e+06	2.62054e+06	2.51187e+06	2.97427e+06	2.79148e+06	2.77073e+06	12.02	2.251e+06	2.28603e+06	7.58	1.24	0.31	0.0018648	2.73	0.0213197	1.72907	244.065	364	6.1	Up
M244T374	4214.7	63449.4	8962.32	5144.44	38244.3	31552.5	6531.51	51069.7	295769	633102	455037	36028.2	91654.5	61183.8	522519	195506	286350	245637	79.64	26146.1	20257.4	89	10.95	3.45	0.0018648	2.73	0.0213197	1.76222	244.029	373.7	6.2	Up
M244T591_1	179857	146642	368818	124968	257039	167860	194838	133656	580702	2.27482e+06	508064	171996	483591	232043	408174	962706	702762	495828	96.66	196710	173858	41.21	3.57	1.84	0.004662	2.33	0.0380456	1.55588	244.163	591.3	9.9	Up
M244T685	55467.2	175568	87695.3	158689	140390	174071	83166.7	207281	270538	654496	741272	306036	509193	78809.6	270964	121939	369156	288500	65.42	135291	149539	39.74	2.73	1.45	0.0379176	1.42	0.147066	1.33795	244.137	684.6	11.4	Up
M244T94	1.29183e+07	3.44096e+07	6.62566e+06	1.59432e+07	7.21605e+06	7.60327e+06	1.31453e+07	7.14171e+06	199537	150912	192566	137398	311056	1.96149e+06	38672	70508.9	382767	171739	168.07	1.31254e+07	1.02608e+07	70.8	0.03	-5.1	0.0001554	3.81	0.00449411	2.16502	244.042	94.4	1.6	Down
M245T104	4.1624e+06	4.00102e+06	1.23273e+06	1.731e+06	3.32882e+06	2.39952e+06	7.31795e+06	3.61641e+06	1.67326e+06	271986	381528	5.8812e+06	768100	2.71287e+06	161652	2.24752e+06	1.76226e+06	1.22068e+06	108.92	3.47373e+06	3.47262e+06	54.17	0.51	-0.98	0.0498834	1.3	0.173853	1.26117	245.03	104	1.7	Down
M245T107	204965	209776	215401	235385	396018	750211	430386	215283	211595	927813	518824	291962	470466	2.03598e+06	2.08522e+06	1.02412e+06	945746	723319	78.6	332178	225393	57.61	2.85	1.51	0.0281274	1.55	0.119973	1.25223	245.097	107.4	1.8	Up
M245T122	1.45148e+06	1.21714e+06	1.10223e+06	1.1366e+06	1.69639e+06	1.14351e+06	1.51958e+06	1.56793e+06	1.67307e+06	1.83169e+06	1.55382e+06	1.38352e+06	1.89847e+06	1.64894e+06	2.65404e+06	1.58046e+06	1.778e+06	1.66101e+06	21.86	1.35436e+06	1.33431e+06	17.06	1.31	0.39	0.014763	1.83	0.078691	1.4582	245.086	121.9	2	Up
M245T157	713626	569313	690582	346109	807786	717675	741068	578827	466472	324971	465091	613551	325653	648007	468557	435567	468484	465781	24.91	645623	702104	22.46	0.73	-0.46	0.0206682	1.68	0.0984557	1.28383	245.066	157.3	2.6	Down
M245T31	11351.7	10633.6	13872.1	21791.8	14719.9	20437.8	19896.6	23814.3	28109.4	70667.2	23066.1	16450.5	18720.8	27422.6	48939.8	35234.7	33576.4	27766	54.06	17064.7	17308.2	29.47	1.97	0.98	0.014763	1.83	0.078691	1.43965	244.895	31.1	0.5	Up
M245T315	554580	768674	430516	1.2545e+06	655340	527290	777589	937456	1.33115e+06	1.76096e+06	1.50736e+06	1.40884e+06	1.22573e+06	926679	1.147e+06	1.20972e+06	1.31468e+06	1.27844e+06	19.14	738243	712007	35.78	1.78	0.83	0.0029526	2.53	0.0288032	1.79244	245.06	315	5.2	Up
M245T327	97272.3	286697	400780	765942	658544	209468	451962	503339	778499	2.58321e+06	999814	865764	290609	783925	844123	184921	916359	814024	79.94	421751	426371	53.1	2.17	1.12	0.0379176	1.42	0.147066	1.03824	245.06	326.7	5.4	Up
M245T393	310880	205114	168621	257450	157973	48549.2	225946	251353	535874	1.14767e+06	438112	271325	465648	943641	610833	907080	665023	573353	45.29	203236	215530	39.25	3.27	1.71	0.0003108	3.51	0.00655521	1.83182	245.041	393.5	6.6	Up
M245T547	8.13477e+06	1.6334e+07	9.43826e+06	6.01934e+07	6.29153e+07	1.92815e+06	4.55715e+07	4.52476e+07	6.32612e+07	1.88789e+08	1.01326e+08	1.24257e+07	9.03338e+07	3.8159e+07	9.35232e+07	1.32355e+08	90021626	9.19285e+07	61.01	3.12204e+07	3.07908e+07	79.7	2.88	1.53	0.014763	1.83	0.078691	1.35667	244.985	547	9.1	Up
M245T579	27183.3	9457.53	22250.6	18868.2	20528.4	22929.8	19221.8	22353.2	272868	490870	263493	314839	425471	265429	198116	322711	319225	293854	29.86	20349.1	21389.5	25.13	15.69	3.97	0.0001554	3.81	0.00449411	2.275	245.118	578.8	9.6	Up
M245T615	66645.4	240857	199876	273877	213005	241805	193001	204497	103193	110667	40367.9	115422	73360.8	75922	112950	75878.8	88470.3	89557.4	29.89	204195	208751	30.28	0.43	-1.21	0.00699301	2.16	0.0487438	1.76638	245.002	614.9	10.2	Down
M245T623	796285	298953	812000	689143	1.07051e+06	615526	1.00026e+06	484630	881625	1.31358e+06	2.17875e+06	644784	1.04627e+06	2.88095e+06	921071	2.74677e+06	1.57672e+06	1179921	56.55	720914	742714	35.57	2.19	1.13	0.0206682	1.68	0.0984557	1.45716	245.104	623	10.4	Up
M245T666	129424	138761	145092	123656	55271.3	51840	74610.2	291219	377593	496651	212687	230193	203566	249748	115279	325475	276399	239970	43.1	126234	126540	60.62	2.19	1.13	0.014763	1.83	0.078691	1.55663	245.15	666.5	11.1	Up
M245T80	3.01333e+06	3.1836e+06	3.61415e+06	2.99524e+06	4.37823e+06	4.04867e+06	3.74828e+06	3.96201e+06	2.07513e+06	2.18212e+06	2.39992e+06	2.42654e+06	2.15711e+06	2.24507e+06	2.28967e+06	1.87164e+06	2.2059e+06	2.21359e+06	8.16	3.61794e+06	3.68122e+06	14.17	0.61	-0.71	0.0001554	3.81	0.00449411	2.11649	245.027	80.2	1.3	Down
M245T800	25627.7	104174	72065.5	315654	62198.2	26672.2	52802.2	63078.2	1.70603e+06	2.17974e+06	1.2886e+06	606028	926258	1.61792e+06	1.04202e+06	1.38589e+06	1.34406e+06	1.33725e+06	36.88	90284	62638.2	104.64	14.89	3.9	0.0001554	3.81	0.00449411	2.15825	245.202	799.9	13.3	Up
M245T83_1	2.40919e+06	3.50568e+06	786771	2.86862e+06	2.19503e+06	2.13158e+06	2.06979e+06	3.30223e+06	4.37833e+06	7.71116e+06	6.57138e+06	2.79111e+06	4.00729e+06	2.84164e+06	6.32309e+06	3.72631e+06	4.79379e+06	4.19281e+06	38.43	2.40861e+06	2.30211e+06	35.37	1.99	0.99	0.004662	2.33	0.0380456	1.52096	244.876	83.3	1.4	Up
M245T83_2	9.89351e+06	7.9454e+06	1.27046e+07	1.21535e+07	1.05127e+07	1.29165e+07	1.38047e+07	1.1638e+07	3.5264e+06	2.91311e+06	6.07851e+06	1.11805e+07	3.36434e+06	3.76799e+06	3.63351e+06	3.31351e+06	4722232	3.57995e+06	58.91	1.14461e+07	1.18958e+07	16.64	0.41	-1.28	0.0010878	2.96	0.0151734	1.91806	245.043	82.9	1.4	Down
M246T125	338413	162109	458196	242634	400028	395765	172805	108707	390759	2.73721e+06	1.7048e+06	309140	319227	1.0063e+06	2.64355e+06	760405	1.23392e+06	883351	81.89	284832	290523	45.76	4.33	2.12	0.0281274	1.55	0.119973	1.55148	246.044	124.7	2.1	Up
M246T327	78826.4	113619	93930.3	88647.8	70648	79701.2	87539.2	67904.2	61838	53159.2	67648.4	61628.5	17325.6	80514.2	98969.7	75805.7	64611.2	64743.2	36.77	85102	83620.2	17.1	0.76	-0.4	0.0498834	1.3	0.173853	1.01524	246.063	326.5	5.4	Down
M246T368	31758.6	15189.3	26148.5	9116.15	27983.5	31859.1	34517.5	20642.9	27955.8	112185	43259.6	53251.3	62969.4	90882.2	75152.1	193731	82423.3	69060.7	63.42	24652	27066	36.29	3.34	1.74	0.0018648	2.73	0.0213197	1.73555	245.539	367.8	6.1	Up
M246T375	366989	404916	333822	352330	196131	163496	214513	284859	336851	11552.9	250120	196843	217738	27613.2	71721.1	80253.3	149087	138548	78.9	289632	309340	30.74	0.51	-0.96	0.0498834	1.3	0.173853	1.22245	246.044	374.9	6.2	Down
M246T99	363866	409251	335152	383499	387573	227346	264848	294946	2.35703e+06	2.13676e+06	3.37915e+06	1.31805e+06	1.64406e+06	2.30428e+06	2.36056e+06	1.74662e+06	2.15581e+06	2.22052e+06	28.98	333310	349509	19.49	6.47	2.69	0.0001554	3.81	0.00449411	2.26009	246.098	99.2	1.7	Up
M247T238	259927	1.31931e+06	385920	168926	339918	79148.6	129571	319783	12678.9	431576	124239	194685	11856.3	25819.2	10015.8	64984.9	109482	45402.1	133.26	375313	289855	105.6	0.29	-1.78	0.0281274	1.55	0.119973	1.41497	247.04	238	4	Down
M247T390	714281	429872	286621	646786	102249	80132.5	478318	379737	834322	800629	1.1032e+06	658464	578100	450292	394439	1.06546e+06	735614	729547	35.84	389750	404805	59	1.89	0.92	0.0206682	1.68	0.0984557	1.38705	247.021	389.9	6.5	Up
M247T477	619.879	293.042	14780.2	897.363	4874.96	417.326	528.67	793.855	61755.1	199341	107415	202.575	69022.1	24919.8	160582	88528.7	88970.9	78775.4	74.52	2900.66	706.87	173.49	30.67	4.94	0.0104118	1.98	0.0628046	1.71522	247.155	476.8	7.9	Up
M247T674	92896.2	112687	159279	136162	121147	98653.9	74338.1	47736.8	175748	118318	146775	103867	102206	353929	176431	173437	168839	160106	48.06	105362	105670	33.35	1.6	0.68	0.0379176	1.42	0.147066	1.17946	246.983	673.5	11.2	Up
M248T303_1	399056	365881	378342	404046	378812	402447	399368	358940	394211	410332	471026	509849	420040	475138	377794	412981	433921	416510	10.58	385861	388934	4.59	1.12	0.17	0.0206682	1.68	0.0984557	1.39136	248.032	303	5	Up
M248T374	507060	406501	112689	458995	122469	46379.8	89669.1	121062	3.12182e+06	3.43576e+06	3.69822e+06	337104	1.40978e+06	1.61274e+06	3.63744e+06	1.03573e+06	2.28608e+06	2.36728e+06	58.28	233103	121766	81.21	9.81	3.29	0.0010878	2.96	0.0151734	1.93844	248.06	373.7	6.2	Up
M248T730	103855	114961	210759	198227	72596.7	37088.7	145103	106510	359671	624795	341610	203210	480220	291786	372414	613590	410912	366043	36.55	123638	110736	47.82	3.32	1.73	0.0003108	3.51	0.00655521	1.94877	248.043	729.9	12.2	Up
M249T154	241284	313247	228975	295227	192122	195867	154121	196814	190875	89747.7	193556	205042	151777	168009	144354	188059	166427	178034	22.57	227207	212894	23.94	0.73	-0.45	0.014763	1.83	0.078691	1.28517	248.924	154.1	2.6	Down
M249T525	333214	249380	259196	200238	238499	200052	231295	240291	122343	83285.5	129001	176780	173083	117783	105155	193227	137582	125672	28.27	244021	239395	17.16	0.56	-0.83	0.0001554	3.81	0.00449411	1.83627	249.113	524.8	8.7	Down
M249T84	4.13807e+07	6.41488e+07	1.89551e+07	6.05852e+07	4.15261e+07	4.88033e+07	1.74878e+07	3.86684e+07	3.91083e+07	5.85819e+06	4.25597e+07	1.54497e+07	8.70134e+06	3.79767e+07	1.15227e+07	3.54388e+07	2.45769e+07	2.54443e+07	63.19	4.14444e+07	4.14534e+07	41.02	0.59	-0.75	0.0379176	1.42	0.147066	1.13531	248.959	84	1.4	Down
M249T97	44194.6	176246	235588	207246	36013.6	172909	355465	251619	196253	1.0265e+06	264729	345296	354200	791909	689546	1.05607e+06	590563	521873	58.47	184910	191746	57.38	3.19	1.68	0.00699301	2.16	0.0487438	1.51963	249.079	96.5	1.6	Up
M250T524	346647	320925	317514	618531	423152	580013	509786	330115	311093	131909	259434	297864	341219	183601	294161	403000	277785	296012	31.02	430836	384899	28.55	0.64	-0.63	0.00699301	2.16	0.0487438	1.39292	250.075	523.8	8.7	Down
M250T84_1	1.01041e+06	613121	506539	555533	889064	489271	899434	706013	1.35883e+06	992689	1.53896e+06	2.48909e+06	1.44801e+06	1.18643e+06	879421	1.90141e+06	1.47435e+06	1.40342e+06	35.33	708673	659567	28.3	2.08	1.06	0.0018648	2.73	0.0213197	1.84213	249.953	84	1.4	Up
M250T90	5.63834e+06	5.13663e+06	6.68737e+06	4.94384e+06	6.82273e+06	5.86521e+06	5.73365e+06	6.2923e+06	8.06909e+06	7.10639e+06	7.69739e+06	8.57923e+06	8.12405e+06	6.34476e+06	5.80122e+06	5.01824e+06	7.09255e+06	7.40189e+06	17.77	5.89001e+06	5.79943e+06	11.51	1.2	0.27	0.0498834	1.3	0.173853	1.21237	250.093	90	1.5	Up
M251T221	342481	855503	433883	249537	229674	149624	313692	241379	126689	168035	281049	230346	174347	150217	230437	199494	195077	186920	25.82	351972	281614	62.66	0.55	-0.85	0.0379176	1.42	0.147066	1.20078	251.041	221.3	3.7	Down
M251T293_2	2241.87	8597.34	6978.72	8388.06	29576.2	3825.61	12348	12031.2	14611.2	326804	11022.1	2227	13268.5	291123	353261	269209	160191	141910	101.22	10498.4	8492.7	80.74	15.26	3.93	0.0498834	1.3	0.173853	1.24245	251.104	293.4	4.9	Up
M251T337	514925	498270	398280	78024.3	329807	36636.7	491226	420671	335193	28376.8	82188.7	156687	258714	69958.2	75731.2	74664.6	135189	78959.9	79.76	345980	409476	54.5	0.39	-1.36	0.0379176	1.42	0.147066	1.0389	251.078	336.8	5.6	Down
M251T544	428798	724949	498380	1.50955e+06	748152	412476	1.4475e+06	1.03426e+06	331047	109550	257626	1.03233e+06	183370	384008	44180.3	261971	325510	259799	94.17	850508	736551	51.53	0.38	-1.39	0.0029526	2.53	0.0288032	1.4849	251.129	543.9	9.1	Down
M251T604	339207	539902	431805	347323	301828	955164	383911	368692	217996	215235	280000	342544	251873	322770	376323	43524.9	256283	265936	40.46	458479	376302	46.55	0.56	-0.84	0.00699301	2.16	0.0487438	1.30773	251.129	604.4	10.1	Down
M251T722	2.80615e+06	5.22461e+06	1.49553e+06	3.37018e+06	2.74583e+06	3.25718e+06	3.63463e+06	6.29601e+06	2.77853e+06	3.94425e+06	1.40228e+06	547715	2.70673e+06	2.73083e+06	442172	2.20591e+06	2.0948e+06	2.45632e+06	57.86	3.60377e+06	3.31368e+06	41.78	0.58	-0.78	0.0281274	1.55	0.119973	1.18644	251.165	721.7	12	Down
M251T742	36883.3	57281.8	38167.4	160479	148599	95533	45358.9	153603	205489	74995.8	235010	154304	168226	123927	238006	207286	175905	186857	32.32	91988.2	76407.4	59.57	1.91	0.94	0.0104118	1.98	0.0628046	1.41928	251.162	742.3	12.4	Up
M251T89	438349	454901	447827	412228	608617	427402	368312	499092	568114	590373	499087	506493	572172	658144	515575	657476	570929	570143	11.05	457091	443088	15.68	1.25	0.32	0.00699301	2.16	0.0487438	1.55478	251.133	89.3	1.5	Up
M252T302	384659	575958	357277	581104	559758	177240	268823	359961	655369	1.56482e+06	1.55038e+06	588833	779097	339492	786902	858087	890374	782999	49.58	408097	372310	36.96	2.18	1.13	0.004662	2.33	0.0380456	1.57101	252.054	301.7	5	Up
M252T304	6.5389e+06	7.97194e+06	4.08571e+06	2.2045e+06	1.22932e+06	3.48032e+06	3.77637e+06	4.91135e+06	214122	205958	201634	2.5859e+06	178987	2.17002e+06	108648	352830	752263	210040	134.5	4.2748e+06	3.93104e+06	51.31	0.18	-2.51	0.0010878	2.96	0.0151734	1.87271	252.088	304.5	5.1	Down
M252T337	36382.9	91920.1	35206.9	71612.3	64035.5	27791.9	36787.1	31796.8	33712.3	16854.3	34597.2	37274.2	26063.8	14437	18372.1	26574.9	25985.7	26319.3	33.69	49441.7	36585	47.26	0.53	-0.93	0.014763	1.83	0.078691	1.44538	252.082	337.1	5.6	Down
M252T722	381015	287958	678870	385637	501109	544008	752344	378532	177982	48952.8	128546	98345.7	511681	307414	150248	85754.7	188616	139397	80.63	488684	443373	33.13	0.39	-1.37	0.004662	2.33	0.0380456	1.69725	252.168	722	12	Down
M252T92	1.77137e+06	674293	1.15039e+06	1.69622e+06	1.55976e+06	2.72903e+06	1.32326e+06	357502	1.59086e+06	2.34931e+06	2.97235e+06	1.95144e+06	1.73918e+06	1.41119e+06	2.20761e+06	2.55195e+06	2.09674e+06	2.07953e+06	25.01	1.40773e+06	1.44151e+06	51.64	1.49	0.57	0.0498834	1.3	0.173853	1.14221	252.144	92.3	1.5	Up
M253T598	32878.9	18616.1	89498.2	109525	80033.6	18279.4	43030.5	28934.5	156084	216836	213530	34342.5	108067	124220	141757	161008	144481	148920	40.77	52599.5	37954.7	67.13	2.75	1.46	0.0029526	2.53	0.0288032	1.63443	253.192	597.6	10	Up
M253T656	2.99072e+06	666719	1.93928e+06	601574	2.37366e+06	2.09191e+06	2.37667e+06	836285	3.38783e+06	3.04588e+06	3.46651e+06	2.5303e+06	3.60828e+06	3.0544e+06	2.53627e+06	2.62907e+06	3.03232e+06	3.05014e+06	14.26	1.7346e+06	2.01559e+06	52.47	1.75	0.81	0.0010878	2.96	0.0151734	1.47872	252.974	656.3	10.9	Up
M253T69	1.96844e+07	1.45797e+07	1.56902e+07	1.47471e+07	2.97774e+07	2.21354e+07	3.11601e+07	7.06262e+07	1.55625e+07	8.67266e+07	6.9978e+07	4.28117e+07	3.35369e+07	3.41613e+07	8.4818e+07	3.77547e+07	5.06687e+07	4.02832e+07	52.04	2.73e+07	2.09099e+07	68.35	1.86	0.89	0.0281274	1.55	0.119973	1.25267	253.002	69.1	1.2	Up
M253T96	1.47489e+06	1.59835e+06	1.47805e+06	1.71286e+06	1.42553e+06	1.44716e+06	1.71736e+06	1.4857e+06	1.23996e+06	790759	1.23463e+06	1.08695e+06	1.04921e+06	1.03513e+06	1.03963e+06	1.10518e+06	1.07268e+06	1.06808e+06	13.09	1.54249e+06	1.48188e+06	7.65	0.7	-0.52	0.0001554	3.81	0.00449411	1.98436	253.05	96	1.6	Down
M254T108	1.83684e+06	1.63004e+06	1.19356e+06	455300	2.31868e+06	1.46911e+06	2.22136e+06	1.33958e+06	336473	278200	396133	913415	468753	639401	228430	508899	471213	432443	47.13	1.55806e+06	1.54958e+06	38.4	0.3	-1.73	0.0018648	2.73	0.0213197	1.8564	254.016	107.7	1.8	Down
M254T151	220310	142103	146301	166167	214438	52271.5	168213	67089.6	511950	3.99168e+06	830496	251349	472578	3.94297e+06	4.27522e+06	3.43823e+06	2.21431e+06	2.13436e+06	82.91	147112	156234	41.53	15.05	3.91	0.0001554	3.81	0.00449411	1.8842	254.08	151.4	2.5	Up
M255T124	114905	144567	94431.8	168266	71909.1	213533	51789.7	123122	386361	765165	589227	360976	354239	321108	664215	332933	471778	373668	36.91	122815	119013	42.72	3.84	1.94	0.0001554	3.81	0.00449411	1.99419	255.083	124.4	2.1	Up
M255T340	1.39905e+06	1.65656e+06	2.41362e+06	487963	2.74218e+06	5.04074e+06	2.36806e+06	1.94487e+06	251935	790553	1.09235e+06	1.4238e+06	1.11678e+06	602124	2.32599e+06	212429	976995	941452	70.68	2.25663e+06	2.15647e+06	58.85	0.43	-1.21	0.0206682	1.68	0.0984557	1.29334	255.044	340.4	5.7	Down
M255T446	1.28709e+06	798895	1.04354e+06	1.13309e+06	3.32039e+06	563416	2.23084e+06	1.82003e+06	970696	682708	1.15126e+06	347876	642719	347744	111953	344853	574977	495298	61.51	1.52466e+06	1.21009e+06	59.2	0.38	-1.41	0.0104118	1.98	0.0628046	1.42198	255.088	446.3	7.4	Down
M255T546	1.3566e+06	306459	6.41856e+06	1.57848e+06	989972	223340	1.62285e+06	2.28196e+07	3.35757e+06	3.53673e+06	3.29796e+07	1.65889e+06	1.95869e+07	6.91582e+06	2.56081e+06	2.00563e+06	9.07524e+06	3.44715e+06	124.76	4.41448e+06	1.46754e+06	174.23	2.06	1.04	0.0379176	1.42	0.147066	1.1225	255.072	546.1	9.1	Up
M255T69_2	195714	972024	403326	1.54862e+06	564641	1.08479e+06	236528	1.05596e+06	2.60303e+06	2.41463e+06	2.82181e+06	3.0143e+06	1.80395e+06	3.30776e+06	3.21815e+06	3.09729e+06	2.78511e+06	2.91805e+06	17.93	757701	768333	63.45	3.68	1.88	0.0001554	3.81	0.00449411	1.85989	254.998	69.1	1.2	Up
M255T766	1.08243e+06	162668	2.60469e+06	246019	2.9488e+06	1.59365e+06	1.71822e+06	897026	6.4434e+06	2.03844e+07	6.9473e+06	1.39571e+06	4.63243e+06	2.37388e+06	3.50949e+06	4.59616e+06	6.28535e+06	4.6143e+06	95.41	1.40669e+06	1.33804e+06	72.12	4.47	2.16	0.004662	2.33	0.0380456	1.57715	255.072	766.4	12.8	Up
M255T86	4.03831e+06	3.04752e+06	3.07893e+06	4.31324e+06	2.72236e+06	2.47676e+06	3.81789e+06	3.06531e+06	2.16638e+06	2.87581e+06	2.42119e+06	2.11848e+06	2.88589e+06	2.27266e+06	2.26405e+06	2.62447e+06	2.45362e+06	2.34693e+06	12.5	3.32004e+06	3.07212e+06	19.77	0.74	-0.44	0.0029526	2.53	0.0288032	1.53894	255.009	86.2	1.4	Down
M256T151	215479	523320	335855	485716	397695	445696	564788	564081	1.02567e+06	2.9088e+06	2.73725e+06	750787	1.85062e+06	1.11745e+06	3.56638e+06	1.68741e+06	1.95555e+06	1.76902e+06	51.92	441579	465706	27.48	4.43	2.15	0.0001554	3.81	0.00449411	1.99431	256.077	151.1	2.5	Up
M256T212	596824	1.11868e+06	408841	406548	611129	466801	431641	487109	500800	1.15756e+06	1.57423e+06	833720	732892	817670	689332	1.13315e+06	929919	825695	36.6	565947	476955	41.85	1.64	0.72	0.00699301	2.16	0.0487438	1.40499	256.094	211.9	3.5	Up
M256T368	129688	147410	178924	143611	112148	82565	127544	143631	73382.8	3146.87	21356.1	77217.4	73685.7	54543.5	6509.18	63723.3	46695.6	59133.4	67.13	133190	136649	21.16	0.35	-1.51	0.0001554	3.81	0.00449411	1.52016	255.821	368.3	6.1	Down
M256T375	568333	769312	293969	853879	368355	352789	88609.3	261771	270348	9451.76	252180	289423	266560	31220.4	141518	186178	180860	219179	61.13	444627	360572	59.22	0.41	-1.3	0.014763	1.83	0.078691	1.15898	256.119	374.6	6.2	Down
M256T421	3664.13	114444	15064.5	162515	143641	3543.11	45624.6	14022.3	18125.7	370175	355810	135627	51742.3	148343	163001	232705	184441	155672	69.68	62814.8	30344.5	106.12	2.94	1.55	0.0206682	1.68	0.0984557	1.27582	256.029	421.2	7	Up
M256T497	86282	12258.2	22911.7	14578.4	54616.2	12534.6	12430.4	56240.3	157202	222196	111348	135255	213556	143915	151677	54222.9	148671	147796	36.15	33981.5	18745.1	82.88	4.38	2.13	0.0010878	2.96	0.0151734	1.90537	256.155	496.5	8.3	Up
M256T684	1.28124e+06	749111	722315	738876	1.79984e+06	607872	707122	1.9325e+06	3.35002e+06	1.54804e+06	3.21726e+06	3.26003e+06	3.8932e+06	3.80121e+06	1.30643e+06	1.50319e+06	2.73492e+06	3.23864e+06	39.89	1.06736e+06	743993	50.08	2.56	1.36	0.004662	2.33	0.0380456	1.73935	255.822	683.5	11.4	Up
M256T704	1.25221e+06	1.73985e+06	1.84813e+06	5.08582e+06	1.37569e+06	1.04362e+06	3.35053e+06	4.31465e+06	4.47804e+06	3.53755e+06	5.24827e+06	2.82072e+06	5.64816e+06	3.84226e+06	4.90918e+06	4.59832e+06	4.38531e+06	4.53818e+06	21.34	2.50131e+06	1.79399e+06	61.65	1.75	0.81	0.0206682	1.68	0.0984557	1.55381	255.822	703.6	11.7	Up
M256T712	688803	1.46325e+06	144988	1.74152e+06	487981	479622	423914	427783	276432	384994	414701	371362	368378	116497	119029	306288	294710	337333	39.93	732232	483801	76.75	0.4	-1.31	0.004662	2.33	0.0380456	1.22581	256.191	712	11.9	Down
M256T98	410137	459030	525486	441591	636936	269073	596047	661285	877357	1.26069e+07	2.30286e+06	3.24119e+06	729240	1.07298e+07	1.02703e+07	9.64092e+06	6.2998e+06	6.44105e+06	78.71	499948	492258	26.31	12.6	3.66	0.0001554	3.81	0.00449411	1.86084	256.06	97.8	1.6	Up
M257T301	887088	635361	1.3046e+06	313923	1.38921e+06	895370	2.39169e+06	1.20919e+06	1.97345e+06	1.19133e+06	1.97767e+06	2.88912e+06	1.90803e+06	2.27959e+06	2.86202e+06	959476	2.00509e+06	1.97556e+06	34.54	1.1283e+06	1.05228e+06	55.25	1.78	0.83	0.0379176	1.42	0.147066	1.35609	257.078	301	5	Up
M257T316	209313	46000.5	176432	291119	435934	182032	225882	193361	780333	380066	758226	374754	555280	590118	491119	739225	583640	572699	28.07	220009	201337	50.43	2.65	1.41	0.000621601	3.21	0.0104451	1.80473	257.078	316.2	5.3	Up
M257T342	344749	300020	365767	221413	210823	227542	350104	322948	198695	54287.9	179145	309143	229943	100121	42509.6	111595	153180	145370	60.21	292921	311484	21.72	0.52	-0.94	0.00699301	2.16	0.0487438	1.45936	257.06	342.1	5.7	Down
M257T402	617680	379306	797586	1.13465e+06	309381	487786	704199	601818	341008	57390.6	58799.4	414293	419419	55031.5	102847	56871.6	188208	80823.3	90.72	629051	609749	41.41	0.3	-1.74	0.0029526	2.53	0.0288032	1.71535	257.06	402.5	6.7	Down
M257T445	9687	10209.4	10549.3	18222.5	4528.31	17535.1	3976.8	9629.74	203573	368518	157328	22270	113667	279066	442261	220920	225950	212247	60.14	10542.3	9948.2	49.27	21.43	4.42	0.0001554	3.81	0.00449411	2.05898	257.14	444.7	7.4	Up
M257T452	541835	592392	530253	698823	905344	546282	542060	694023	1.86893e+06	2.24092e+06	1.86511e+06	1.17414e+06	2.31841e+06	1.54919e+06	1.43499e+06	1.92457e+06	1.79703e+06	1.86702e+06	21.81	631376	569337	20.61	2.85	1.51	0.0001554	3.81	0.00449411	2.1732	257.06	451.5	7.5	Up
M257T485	273430	665305	372985	423336	27260.4	38357.6	203488	288942	71458.1	18837.9	11918.5	90828.8	49532.3	66302	57823.3	82769.5	56183.8	62062.7	50.54	286638	281186	72.89	0.2	-2.35	0.0379176	1.42	0.147066	1.40705	257.14	484.9	8.1	Down
M257T501	231993	592407	142443	469861	284725	269511	683378	295988	94574	198725	216328	238090	325619	7059.6	3071.83	185938	158676	192332	71.92	371288	290357	51.03	0.43	-1.23	0.0206682	1.68	0.0984557	1.16192	257.048	501	8.3	Down
M257T540	70462.1	151522	107398	201307	277051	72524	253846	53614.1	585785	535244	203470	191507	991496	217984	785406	683156	524256	560515	56.91	148465	129460	58.6	3.53	1.82	0.00699301	2.16	0.0487438	1.67635	257.139	539.6	9	Up
M257T594	77150.1	66051	96287.4	119628	58216.7	57037.9	55610.4	58215	875340	1.83849e+06	614386	993422	1.47445e+06	540128	1.18611e+06	1.58056e+06	1.13786e+06	1.08976e+06	41	73524.6	62133.8	31.58	15.48	3.95	0.0001554	3.81	0.00449411	2.24814	257.176	594.2	9.9	Up
M257T627	791855	1.39917e+06	1.15173e+06	2.73786e+06	669909	1.06208e+06	1.17658e+06	618572	617814	176972	667558	579525	446007	190475	480147	458503	452125	469325	40.54	1.20097e+06	1.10691e+06	56.41	0.38	-1.41	0.0003108	3.51	0.00655521	1.64815	257.176	626.5	10.4	Down
M257T651	2.07894e+06	1.76828e+06	1.7232e+06	1.58156e+06	2.17837e+06	1.57775e+06	2.31495e+06	1.75139e+06	2.19321e+06	5.01586e+06	5.28951e+06	6.39411e+06	2.27548e+06	9.22624e+06	9.32746e+06	6.3316e+06	5.75668e+06	5.81055e+06	46.94	1.8718e+06	1.75983e+06	14.99	3.08	1.62	0.000621601	3.21	0.0104451	1.86545	257.175	650.8	10.8	Up
M257T84_2	2.08396e+06	2.1928e+06	2.26797e+06	2.05455e+06	2.21704e+06	2.32874e+06	2.25505e+06	2.35094e+06	2.42473e+06	3.52198e+06	2.70677e+06	2.54731e+06	2.57359e+06	4.14268e+06	3.46378e+06	4.37785e+06	3.21984e+06	3.08527e+06	23.79	2.21888e+06	2.23605e+06	4.79	1.45	0.54	0.0001554	3.81	0.00449411	1.70319	257.11	84.1	1.4	Up
M257T86	1.95112e+07	1.39561e+07	2.4419e+07	1.7286e+07	1.50996e+07	1.07872e+07	2.62386e+07	3.39497e+07	2.40024e+07	4.9192e+07	2.42265e+07	3.43789e+07	2.79703e+07	4.46626e+07	4.34959e+07	3.76081e+07	3.56921e+07	3.59935e+07	27.14	2.01559e+07	1.83986e+07	37.78	1.77	0.82	0.00699301	2.16	0.0487438	1.67015	257.075	85.8	1.4	Up
M257T99	60467.4	389055	53919.8	433991	50184.7	190319	191161	198893	468875	922517	544433	264062	393191	198627	669559	382992	480532	431033	48.41	195999	190740	75.62	2.45	1.29	0.0104118	1.98	0.0628046	1.44917	257.016	98.5	1.6	Up
M258T105	34686.1	36747.6	32829.1	34479.3	69566.8	29731.4	32037.5	37655.6	39392.5	35241.8	74644.9	73475.7	69201.6	1.09444e+06	76821.7	84748.1	193496	74060.3	188.37	38466.7	34582.7	33.33	5.03	2.33	0.0029526	2.53	0.0288032	1.16199	258.182	105.3	1.8	Up
M258T126	76202.2	321562	377947	368068	210875	75130.9	256864	312140	627346	512611	443990	252568	617932	512930	692485	124864	473091	512771	41.27	249849	284502	48.23	1.89	0.92	0.0281274	1.55	0.119973	1.19413	257.956	126.1	2.1	Up
M258T301	70521.7	105638	101729	104813	151194	76684.5	91890	109983	168460	228046	210804	165869	130463	111026	116841	181780	164161	167165	26.04	101557	103271	24.23	1.62	0.69	0.0010878	2.96	0.0151734	1.68551	258.082	301.1	5	Up
M258T345	166045	163567	149603	198009	168065	75947.7	99914.1	116556	47712.1	59305.1	74745	138571	137423	113232	33672.2	92235.1	87112	83490	45.96	142213	156585	28.75	0.61	-0.71	0.014763	1.83	0.078691	1.30345	257.819	344.6	5.7	Down
M258T368	202394	87805.9	146775	39597.1	243651	140480	267872	160030	53163.6	40255.7	30360.2	83460.3	91812.9	149429	9127.33	97846.2	69431.9	68312	64.83	161075	153402	47.33	0.43	-1.21	0.0281274	1.55	0.119973	1.31122	257.819	368.3	6.1	Down
M258T438	160208	235245	170557	153783	106779	18068	174724	239640	283589	273570	373994	530584	423778	214079	141831	213081	306813	278580	41.69	157376	165383	45.12	1.95	0.96	0.0206682	1.68	0.0984557	1.32787	258.044	437.8	7.3	Up
M258T452	214999	254890	194476	265414	160134	47523.8	289131	154714	150167	26410.8	38443.9	88227	94413.2	16000.4	2758.81	190672	75886.7	63335.5	89.06	197660	204738	39.35	0.38	-1.38	0.004662	2.33	0.0380456	1.3076	258.063	451.5	7.5	Down
M258T487	103018	33132.6	127489	142460	38183.3	70216	13786.3	109993	25365.3	23703.6	37096.2	50912.3	17803.5	6700.66	17293.4	26404.8	25660	24534.5	52.37	79784.7	86617	59.94	0.32	-1.64	0.0206682	1.68	0.0984557	1.38089	258.117	486.8	8.1	Down
M258T651	1.02729e+06	1.21885e+06	1.17951e+06	999286	924545	952903	1.21379e+06	818701	888889	895225	939128	717003	646108	668434	738459	930413	802957	813674	15.25	1.04186e+06	1.01329e+06	14.21	0.77	-0.38	0.004662	2.33	0.0380456	1.55177	258.179	650.5	10.8	Down
M258T703	794401	2.23389e+06	927402	8.67971e+06	894988	1.26298e+06	2.28887e+06	2.23776e+06	3.96939e+06	1.33397e+07	5.45929e+06	6.19881e+06	5.73758e+06	1.84418e+06	3.57545e+06	8.16175e+06	6.03577e+06	5.59843e+06	58.14	2.415e+06	1.74843e+06	108.21	2.5	1.32	0.0206682	1.68	0.0984557	1.51355	257.819	703.5	11.7	Up
M258T762	112142	32506.4	23511.2	121395	204971	13919.1	179426	29474.1	333199	842226	994808	133486	133276	53852.4	437408	437495	420719	385304	81.11	89668	72324.2	84.16	4.69	2.23	0.0104118	1.98	0.0628046	1.567	258.15	762.5	12.7	Up
M258T93	195999	93063.7	155597	91508.2	308451	154088	317402	287585	411027	351119	442917	421261	339178	327171	352830	347915	374177	351974	11.7	200462	175798	46.38	1.87	0.9	0.0001554	3.81	0.00449411	1.74401	257.982	92.5	1.5	Up
M259T356	869056	1.37211e+06	657761	1.37477e+06	1.05593e+06	687384	758038	569135	579042	306879	669278	774184	620683	357042	409945	565686	535342	572364	30.35	918023	813547	34.56	0.58	-0.78	0.0104118	1.98	0.0628046	1.50549	259.039	356.2	5.9	Down
M259T597	1.26497e+06	791862	1.20273e+06	48677.8	1.76065e+06	345765	1.06858e+06	472921	283465	33936.5	478719	319327	49642.6	555249	55187.7	306715	260280	295090	76.64	869519	930219	64.66	0.3	-1.74	0.0281274	1.55	0.119973	1.15986	259.134	596.6	9.9	Down
M259T637	1.52949e+06	1.02276e+06	899797	843996	768945	683307	909309	862796	608903	201764	762977	716011	721604	567403	307428	649134	566903	629019	36.14	940050	881297	27.48	0.6	-0.73	0.0010878	2.96	0.0151734	1.39652	259.191	637.1	10.6	Down
M259T668	369347	674420	342542	768820	377350	266204	469443	497888	384404	1.18304e+06	880076	864570	1.12048e+06	553938	412657	1.10382e+06	812873	872323	39.84	470752	423396	36.65	1.73	0.79	0.0206682	1.68	0.0984557	1.33139	259.191	667.7	11.1	Up
M259T724	389918	1.10581e+06	295078	75522.1	83587.8	55682.7	317154	212406	16107.1	510393	55445.5	113776	19447.8	52674.6	26804.7	38605	104157	45639.8	160.39	316895	253742	108.01	0.33	-1.61	0.0206682	1.68	0.0984557	1.30542	258.981	724.2	12.1	Down
M260T103	5.86893e+06	1.01338e+07	5.26732e+06	4.71143e+06	3.23074e+06	2.40385e+06	5.13727e+06	4.30061e+06	6.77939e+06	9.44818e+06	9.32367e+06	8.46429e+06	5.9961e+06	8.84684e+06	6.75702e+06	8.54687e+06	8.02029e+06	8.50558e+06	16.41	5.13174e+06	4.92435e+06	45.11	1.56	0.64	0.0104118	1.98	0.0628046	1.52766	260.072	103.4	1.7	Up
M260T123	458752	547833	660989	657994	645684	453203	772209	707325	1.40518e+06	1.3156e+06	1.59048e+06	1.26544e+06	1.46328e+06	1.29687e+06	1.32061e+06	1.33601e+06	1.37418e+06	1.32831e+06	7.84	612999	651839	18.82	2.24	1.16	0.0001554	3.81	0.00449411	2.23554	260.06	122.8	2	Up
M260T125	873993	670405	679549	867521	676932	493312	991844	1.13187e+06	1.13528e+06	1.35981e+06	1.08053e+06	1.06199e+06	1.29791e+06	1.08998e+06	1.01078e+06	1.46957e+06	1.18823e+06	1.11263e+06	13.94	798178	773535	25.83	1.49	0.57	0.0018648	2.73	0.0213197	1.76653	260.045	125.1	2.1	Up
M260T256	168668	134442	156896	174557	128291	199829	157037	158696	104455	83747.1	121092	197020	119877	109251	62650.9	131469	116195	114564	33.98	159802	157866	14.1	0.73	-0.46	0.0104118	1.98	0.0628046	1.39542	260.06	256.1	4.3	Down
M260T33	244053	192417	273725	190914	197233	253850	236957	237993	394419	600583	485568	453147	431124	546271	556524	537778	500677	511673	14.16	228393	237475	13.63	2.19	1.13	0.0001554	3.81	0.00449411	2.20045	259.816	32.6	0.5	Up
M260T332	29636.3	79808.8	31307.1	113506	74659.8	41606.9	135446	46663.2	118891	65338.7	106365	157863	96917.8	311846	94036.1	126975	134779	112628	56.73	69079.3	60661.5	56.77	1.95	0.96	0.0379176	1.42	0.147066	1.34859	260.023	331.8	5.5	Up
M260T365	71037.7	98499	78114.2	73937.2	75092.6	64959.8	78303.7	89985.9	100414	81124	79767.7	104426	100163	89926	82088.8	99851.4	92220.1	94888.7	11.02	78741.3	76603.4	13.6	1.17	0.23	0.0104118	1.98	0.0628046	1.32773	260.104	365.4	6.1	Up
M260T394	54158.1	60712.6	102478	143987	56386.2	61891.6	192014	62807.8	26596.9	166679	104872	238088	228364	248023	138424	205620	169584	186150	45.25	91804.3	62349.7	55.62	1.85	0.89	0.0498834	1.3	0.173853	1.02511	260.024	393.9	6.6	Up
M260T407	1.9647e+06	907062	1.41107e+06	756767	2.09388e+06	1.66355e+06	2.29164e+06	1.60491e+06	598294	113749	59409.2	546413	1.02896e+06	1.28401e+06	61014.6	1.11439e+06	600780	572354	82.95	1.5867e+06	1.63423e+06	34.39	0.38	-1.4	0.004662	2.33	0.0380456	1.48557	260.059	407	6.8	Down
M260T76_2	1.66413e+06	2.09597e+06	1.35929e+06	2.0789e+06	1.459e+06	2.1143e+06	1.4373e+06	1.60034e+06	2.6973e+06	5.00142e+06	3.04622e+06	1.8191e+06	2.51989e+06	2.35136e+06	3.44592e+06	3.16666e+06	3.00598e+06	2.87176e+06	31.74	1.72615e+06	1.63223e+06	18.59	1.74	0.8	0.0010878	2.96	0.0151734	1.70773	260.078	76.1	1.3	Up
M260T92	2.54592e+06	2.47589e+06	2.84394e+06	3.23209e+06	1.95229e+06	1.18426e+06	2.47677e+06	4.31928e+06	1.39259e+06	79700.2	568072	2.77425e+06	1.1075e+06	1.85549e+06	76287.6	1.05948e+06	1.11417e+06	1.08349e+06	81.92	2.6288e+06	2.51135e+06	34.82	0.42	-1.24	0.00699301	2.16	0.0487438	1.33429	260.088	91.8	1.5	Down
M261T104	588473	366613	488092	335247	658370	433544	693377	581899	784156	638293	720952	807121	597429	806224	723998	720550	724840	722475	10.52	518202	534996	25.67	1.4	0.48	0.0018648	2.73	0.0213197	1.64084	261.077	103.8	1.7	Up
M261T326	25538.4	37375.1	35290.1	112236	31547.5	17383.4	35956.2	121764	96750.7	219315	300778	376382	549080	62525.5	74048.7	213535	236552	216425	71.17	52136.3	35623.2	77.95	4.54	2.18	0.004662	2.33	0.0380456	1.74741	261.018	326.1	5.4	Up
M261T328	78345.8	81397.6	57730.2	83440.7	68211.8	97317.1	66988.2	71425.3	108561	482746	198523	305223	142953	88197.7	146291	95405	195987	144622	69.22	75607.1	74885.6	16.12	2.59	1.37	0.000621601	3.21	0.0104451	1.5974	261.055	327.7	5.5	Up
M261T450	68023.3	81004.3	80445.7	128991	111359	62726.4	50217.9	87978	135895	318411	131477	59596.2	96154.7	112378	161495	215178	153823	133686	52.5	83843.1	80725	30.77	1.83	0.88	0.0206682	1.68	0.0984557	1.31792	261.044	450.2	7.5	Up
M261T638	348532	492357	361365	531776	207928	411967	256611	447826	244924	177491	217010	238805	210353	135463	157023	245414	203310	213681	20.71	382295	386666	29.23	0.53	-0.91	0.0029526	2.53	0.0288032	1.77744	261.149	637.5	10.6	Down
M261T666	91806.2	196274	161486	125582	108723	51597	140812	159516	60062.8	60415.2	43269.5	141539	89381.8	99528.3	108545	87455.8	86274.7	88418.8	36.5	129474	133197	35.09	0.67	-0.59	0.0498834	1.3	0.173853	1.06125	261.116	665.9	11.1	Down
M261T95	4.27823e+07	7.07874e+07	4.6157e+07	5.99772e+07	2.72352e+07	3.41757e+07	6.04179e+07	3.93793e+07	4.4271e+08	3.15568e+08	5.66824e+08	3.4119e+08	4.10866e+08	4.90475e+08	5.97912e+08	4.22111e+08	4.48457e+08	4.32411e+08	22.21	4.7614e+07	4.44696e+07	31.18	9.42	3.24	0.0001554	3.81	0.00449411	2.2678	261.131	94.8	1.6	Up
M261T97	4.9727e+06	1.14296e+07	4.12688e+06	1.51826e+07	3.23094e+06	3.76903e+07	2.3131e+07	2.07164e+07	2.43812e+06	2.86876e+06	2.10871e+06	3.33637e+06	3.40583e+06	1.97788e+07	2.0518e+06	2.23292e+06	4.77766e+06	2.65344e+06	127.35	1.506e+07	1.33061e+07	78.71	0.32	-1.66	0.00699301	2.16	0.0487438	1.48851	261.055	96.6	1.6	Down
M262T126	18720.3	21911.4	11878.6	24576.8	25295.1	17478.4	22265.9	82254.4	107398	373333	40787.5	95014.6	139903	99530.1	246785	301856	175576	123650	66.87	28047.6	22088.6	79.6	6.26	2.65	0.0003108	3.51	0.00655521	1.91206	262.129	125.6	2.1	Up
M262T434	187180	86784.7	255487	45566.7	43327	3064.75	245752	74894.1	47572.6	24948.8	313.608	691.503	50706.8	656.386	21755.7	307.608	18369.1	11223.6	116.97	117757	80839.4	83	0.16	-2.68	0.0104118	1.98	0.0628046	1.40215	262.138	434.2	7.2	Down
M262T441	50087.7	62453.9	52514.1	46679	13098.2	6317.85	272608	60901.6	7520.3	24497.7	24962.7	13368.7	6649.42	15339.5	8585.29	2840.73	12970.5	10977	63.44	70582.6	51300.9	119.41	0.18	-2.44	0.0281274	1.55	0.119973	1.35969	262.098	440.7	7.3	Down
M262T574	312518	208322	281032	131736	121717	150875	232580	315064	351725	295936	301253	241631	295398	308556	345296	346197	310749	304904	11.83	219230	220451	36.1	1.42	0.5	0.0281274	1.55	0.119973	1.4565	262.111	574.1	9.6	Up
M263T110	1.49175e+06	1.83811e+06	2.74692e+06	1.42631e+06	878821	1.03516e+06	2.44039e+06	1.54143e+06	163409	164546	150235	1.65897e+06	470909	1.50738e+06	100889	585431	600221	317727	105.24	1.67486e+06	1.51659e+06	38.55	0.36	-1.48	0.014763	1.83	0.078691	1.61778	263.043	109.7	1.8	Down
M263T217	1.38676e+06	2.99702e+06	1.02037e+06	1.87811e+06	4.22136e+06	1.99305e+06	1.82053e+06	951044	1.37546e+06	69252.6	1.62981e+06	2.05161e+06	841055	859886	1.32712e+06	516384	1.08382e+06	1.0935e+06	58.76	2.03353e+06	1.84932e+06	53.88	0.53	-0.91	0.0498834	1.3	0.173853	1.07753	263.097	216.7	3.6	Down
M263T91	372277	357132	371354	367492	335960	356390	360667	338247	318208	281609	311846	324047	296669	271725	252254	277183	291692	289139	8.64	357440	358899	3.89	0.82	-0.29	0.0001554	3.81	0.00449411	1.96305	263.094	91.4	1.5	Down
M264T147	187472	212803	138933	110597	133112	69058.3	147133	123287	52799.9	23540.8	60062.1	96425.1	76991.1	64445.9	22917	136938	66765.1	62254	56.45	140299	136022	31.68	0.48	-1.07	0.004662	2.33	0.0380456	1.51768	264.028	147.2	2.5	Down
M264T572	118442	73347.9	155434	328345	173728	98856.1	124970	116199	126227	646657	645394	85998.2	268784	414383	801695	720562	463713	529889	60.1	148665	121706	53.11	3.12	1.64	0.0281274	1.55	0.119973	1.47494	263.989	571.9	9.5	Up
M264T762	994646	1.24328e+06	498548	1.12246e+06	655858	495234	637237	397969	593123	56572.6	596909	663257	300793	197496	97411.6	384938	361312	342865	65.66	755653	646548	42.3	0.48	-1.06	0.0281274	1.55	0.119973	1.32764	264.168	761.6	12.7	Down
M265T111	235125	413263	211723	346464	272600	266768	346569	214836	157935	54140.9	253391	306638	138353	12189.3	14377.8	78734.7	126970	108544	85.67	288419	269684	25.27	0.44	-1.18	0.0104118	1.98	0.0628046	1.39951	265.094	111.5	1.9	Down
M265T121	149226	120826	95985.5	354102	165848	79196	171831	172180	1.52105e+06	3.14592e+06	660121	183275	647836	816672	1.72232e+06	183637	1.1101e+06	738397	89.49	163649	157537	51.73	6.78	2.76	0.000621601	3.21	0.0104451	1.71595	264.525	121.4	2	Up
M265T293	86095	82699	91214.5	103640	93585.1	105677	77141	95065.7	97027.3	113159	102093	128242	99958.2	149585	145058	122059	119648	117609	16.93	91889.6	92399.8	10.7	1.3	0.38	0.004662	2.33	0.0380456	1.57425	265.093	293	4.9	Up
M265T363	409673	205568	235871	401250	145154	147808	217725	364402	140466	41718.2	43579.6	473570	167031	61180.5	108402	175512	151433	124434	92.85	265931	226798	41.21	0.57	-0.81	0.0379176	1.42	0.147066	1.23967	265.086	362.7	6	Down
M265T540	257767	384968	368071	629107	199594	468457	262630	445619	207374	176272	110926	97565.2	79797.6	60699.3	198228	82020.3	126610	104246	45.99	377027	376519	36.91	0.34	-1.57	0.0003108	3.51	0.00655521	1.90978	265.144	539.5	9	Down
M265T707	79448	237726	73554.2	105984	85751.5	66755.8	84452.3	78792.5	298002	377468	567270	388455	149626	312885	320450	613974	378516	348959	39.66	101558	81950.1	55.33	3.73	1.9	0.0003108	3.51	0.00655521	1.99722	264.974	707.1	11.8	Up
M265T752	1.64727e+06	502823	1.83588e+06	403229	895886	1.11295e+06	872925	1.79803e+06	1.07862e+06	1.65094e+06	3.2213e+06	2.62727e+06	1.77738e+06	1.88913e+06	2.92755e+06	1.83193e+06	2.12551e+06	1.86053e+06	34.11	1.13363e+06	1.00442e+06	50.06	1.87	0.91	0.014763	1.83	0.078691	1.49776	265.18	752.4	12.5	Up
M265T837	1.74749e+06	426315	485335	812270	474328	509328	572581	1.41871e+06	2.09786e+06	1.53679e+06	1.97677e+06	1.45494e+06	2.24197e+06	2.01924e+06	1.83826e+06	3.08785e+06	2.03171e+06	1.99801e+06	24.84	805794	540955	62.25	2.52	1.33	0.000621601	3.21	0.0104451	1.90062	265.181	837.2	14	Up
M266T765	9.3421e+06	8.49575e+06	6.53411e+06	1.24986e+07	1.072e+07	5.37686e+06	7.51756e+06	8.2043e+06	1.46673e+07	1.41103e+07	1.02845e+07	1.05845e+07	1.08677e+07	1.08537e+07	8.32767e+06	1.17986e+07	1.14368e+07	1.08607e+07	18.13	8.58616e+06	8.35002e+06	26.5	1.33	0.41	0.0281274	1.55	0.119973	1.36423	266.151	765.2	12.8	Up
M267T127	554789	345231	509217	361695	542203	445699	409716	378799	534495	489200	559376	628995	555412	661284	585508	581965	574529	570671	9.34	443419	427707	18.7	1.3	0.37	0.0029526	2.53	0.0288032	1.63995	267.11	126.6	2.1	Up
M267T153	68678.7	103903	48174.9	98779.4	623093	123607	110712	28734.2	544056	1.0647e+06	1.46082e+06	1.28993e+06	1.23182e+06	1.02107e+06	1.60767e+06	1.01028e+06	1.15379e+06	1.14826e+06	28.23	150710	101341	128.49	7.66	2.94	0.0003108	3.51	0.00655521	2.04336	267.189	153.4	2.6	Up
M267T251_2	258780	274712	247615	274580	284362	188175	322766	279038	424919	542012	701215	612643	545056	641775	583538	696141	593412	598091	15.39	266253	274646	14.42	2.23	1.16	0.0001554	3.81	0.00449411	2.2117	267.19	250.8	4.2	Up
M267T509	64297	75390.1	164452	207158	191903	59698.7	70314.2	69333.4	371263	140753	251362	281917	83050.6	180132	198445	195491	212802	196968	41.64	112818	72852.2	56.15	1.89	0.92	0.0206682	1.68	0.0984557	1.4105	267.124	508.9	8.5	Up
M267T596	156520	152873	49263.4	14550.4	87555.9	192286	110481	17193.8	1.37834e+06	401405	869491	440003	593693	953151	1.18846e+06	803485	828504	836488	41.77	97590.5	99018.7	68.69	8.49	3.09	0.0001554	3.81	0.00449411	1.94315	267.16	595.6	9.9	Up
M267T624	58704.8	98230.9	105286	204051	220705	138728	109552	75967.6	351767	1.24726e+06	735922	72836.5	419037	388298	785154	744059	593042	577479	60.77	126403	107419	46.06	4.69	2.23	0.00699301	2.16	0.0487438	1.70595	267.16	624.1	10.4	Up
M267T74_2	428490	260415	401638	301544	366821	461135	317033	357115	354801	544971	451929	448366	419037	443616	672613	580767	489512	450148	20.9	361774	361968	18.65	1.35	0.44	0.0206682	1.68	0.0984557	1.46682	267.035	73.9	1.2	Up
M267T765_2	394568	380624	394563	302332	391325	121673	769268	117679	2.29413e+06	116369	1.42504e+06	1.346e+06	925198	691478	610695	900244	1.03864e+06	912721	63.1	359004	385975	56.71	2.89	1.53	0.0206682	1.68	0.0984557	1.34559	267.155	765.1	12.8	Up
M267T790	1.41511e+08	2.72634e+08	9.38943e+07	3.2244e+08	1.75685e+08	1.02973e+08	9.95501e+07	3.95726e+07	7.3786e+07	2.3512e+07	8.79377e+07	5.81898e+07	4.12686e+07	7.69535e+07	8.48894e+07	4.99047e+07	6.20552e+07	6.59879e+07	36.7	1.56033e+08	1.22242e+08	61.91	0.4	-1.33	0.00699301	2.16	0.0487438	1.42874	267.196	790.2	13.2	Down
M267T91	7.66483e+08	7.38375e+08	6.91119e+08	6.99515e+08	6.74799e+08	7.11756e+08	7.02103e+08	6.35821e+08	1.84216e+07	2.08777e+07	2.96747e+07	8.13819e+06	1.67107e+07	1.28792e+07	1.26532e+07	1.98261e+07	1.73977e+07	1.75662e+07	37.56	7.02496e+08	7.00809e+08	5.6	0.02	-5.34	0.0001554	3.81	0.00449411	2.28839	267.073	91.4	1.5	Down
M268T126	69906.3	121852	111856	91233.6	152092	217512	100151	75971	51743	52704.5	81582.8	26983.5	64699.8	68738.8	107697	11708.2	58232.2	58702.1	51.75	117572	106003	40.96	0.5	-1.01	0.004662	2.33	0.0380456	1.45574	267.986	126.1	2.1	Down
M268T266	366585	433999	159833	99708.7	55458.3	283461	228291	327088	1293.95	91228.8	709.484	94308.2	452.249	102466	862.166	1362.9	36585.5	1328.42	134.75	244303	255876	54.32	0.15	-2.74	0.0018648	2.73	0.0213197	1.75911	268.046	265.7	4.4	Down
M268T765	35375.6	236325	32707	159251	54453.9	104257	39006.7	27960.5	124931	495245	147374	55983.4	58085.7	235557	202067	364549	210474	174721	72.71	86167.1	46730.3	88.03	2.44	1.29	0.0379176	1.42	0.147066	1.16722	268.147	765.1	12.8	Up
M268T790	2.15922e+07	4.1065e+07	1.56648e+07	3.32807e+07	2.576e+07	1.72312e+07	1.4603e+07	1.55967e+07	9.39994e+06	1.66281e+07	1.0234e+07	1.18278e+07	1.09024e+07	1.7246e+07	6.27912e+06	6.42852e+06	1.11182e+07	1.05682e+07	36.87	2.30992e+07	1.94117e+07	41.84	0.48	-1.05	0.00699301	2.16	0.0487438	1.70756	268.199	790.2	13.2	Down
M269T205	71957.5	81056.8	66363.7	65620.5	42177.2	59171.1	72573.3	83655.4	85676.3	185893	92140.4	52783.4	81858.8	141842	143171	171462	119353	116991	39.97	67821.9	69160.6	19.35	1.76	0.82	0.0104118	1.98	0.0628046	1.43375	269.125	204.6	3.4	Up
M269T374	384723	127964	90605.2	32913.1	32914.7	20921.2	79242.7	24416.4	508701	278901	131428	28143.7	50056.9	590605	280964	680388	318648	279932	78.28	99212.6	56078.7	122.46	3.21	1.68	0.0498834	1.3	0.173853	1.18967	269.103	373.8	6.2	Up
M269T432	69927.4	138291	59144.4	63118.8	40604.8	39935.4	54078.9	43617.3	110314	142464	247361	173060	96197.8	123876	123788	140683	144718	132279	32.8	63589.7	56611.7	50.5	2.28	1.19	0.0018648	2.73	0.0213197	1.85433	269.082	432.4	7.2	Up
M269T485	126731	132600	134149	180142	169895	8042.33	181057	148235	267372	809557	244674	333743	183956	640436	685668	607971	471672	470857	50.81	135106	141192	41.25	3.49	1.8	0.0001554	3.81	0.00449411	1.59756	269.139	485.3	8.1	Up
M269T487	205447	353629	218356	158424	217211	186598	252491	230662	135702	9956.01	119863	158543	125084	53580	57598.3	84718.5	93130.5	102291	53.91	227852	217783	25.52	0.41	-1.29	0.0003108	3.51	0.00655521	1.5291	269.041	486.5	8.1	Down
M269T609	1.09261e+06	502606	1.36738e+06	1.86263e+06	760559	1.05276e+06	1.0022e+06	1.59096e+06	1.33686e+06	662446	370920	378351	615864	315773	308624	328361	539649	374635	64.92	1.15397e+06	1.07269e+06	38.12	0.47	-1.1	0.00699301	2.16	0.0487438	1.57081	268.984	609.4	10.2	Down
M269T667	578741	301206	448973	361117	664103	324914	377347	441361	4.10053e+06	2.20428e+06	1.16378e+06	1.38714e+06	4.44106e+06	4.0333e+06	3.57501e+06	5.20469e+06	3.26372e+06	3.80415e+06	45.74	437220	409354	28.95	7.46	2.9	0.0001554	3.81	0.00449411	2.12502	269.082	667.3	11.1	Up
M269T826	1.92858e+07	2.22588e+06	2.97169e+06	7.05156e+06	2.14041e+06	7.61082e+06	2.08165e+06	4.21943e+06	1.09934e+08	1.11618e+08	5.83482e+07	8.83677e+06	1.30208e+08	2.4305e+07	6.68128e+07	8.83737e+07	7.48044e+07	7.75932e+07	57.79	5.9484e+06	3.59556e+06	97.82	12.58	3.65	0.0003108	3.51	0.00655521	1.96608	269.212	825.6	13.8	Up
M270T113	136191	69442	106639	101571	109899	56307.2	111388	92066.4	90169.3	14590.8	101356	84380.4	74555.4	73760.9	22334.9	15925.9	59634.2	74158.2	60.26	97937.9	104105	25.76	0.61	-0.72	0.0281274	1.55	0.119973	1.16391	270.04	113.1	1.9	Down
M270T148	36498.6	64849.3	24927.3	64445.4	32560.6	19254.9	29174.2	23307.5	57176	93673.3	65937.3	41720	23142.4	52101.3	102071	101550	67171.4	61556.6	43.65	36877.2	30867.4	48.7	1.82	0.87	0.0498834	1.3	0.173853	1.28573	270.01	147.7	2.5	Up
M270T166	2.11024e+06	3.37677e+06	1.65651e+06	1.9338e+06	1.10045e+06	2.87705e+06	2.10401e+06	3.24008e+06	538356	338318	410598	1.87874e+06	537644	1.65063e+06	298721	654522	788441	538000	78.2	2.29986e+06	2.10712e+06	34.62	0.34	-1.54	0.0010878	2.96	0.0151734	1.8263	270.081	165.5	2.8	Down
M270T487	67090.4	74838	2490.29	94765.7	2396.75	58134.4	120921	103017	115998	374167	107727	120286	114016	622790	264998	380945	262616	192642	71.09	65456.6	70964.2	66.92	4.01	2	0.0018648	2.73	0.0213197	1.37204	270.035	486.5	8.1	Up
M270T82	543911	1.96868e+06	1.81897e+06	1.7822e+06	1.43344e+06	2.28069e+06	588858	1.79032e+06	319948	735891	1.17544e+06	2.04575e+06	384943	1.38138e+06	340596	409853	849225	572872	74.23	1.52588e+06	1.78626e+06	41.73	0.56	-0.85	0.0498834	1.3	0.173853	1.22035	269.929	82.1	1.4	Down
M270T825	8.22042e+06	2.65531e+06	3.70657e+06	2.566e+06	1.42265e+06	1.26385e+06	4.1805e+06	9.92614e+06	9.71621e+06	9.72585e+06	4.31382e+06	1.09231e+07	1.51236e+07	3.9432e+06	3.08101e+06	1.09921e+07	8.47737e+06	9.72103e+06	50.16	4.24268e+06	3.18094e+06	74.84	2	1	0.0281274	1.55	0.119973	1.30093	270.215	825.2	13.8	Up
M270T834	9.41025e+06	3.71077e+06	8.83132e+06	6.32848e+06	4.11687e+06	6.68769e+06	3.4259e+06	2.53195e+06	5.58402e+07	5.48197e+07	2.70128e+07	3.16027e+07	2.09689e+07	6.92019e+07	5.2694e+07	3.05935e+07	4.28417e+07	4.21483e+07	40.52	5.6304e+06	5.22267e+06	45.81	7.61	2.93	0.0001554	3.81	0.00449411	2.12166	270.215	834.3	13.9	Up
M271T311	103896	108495	103665	82324.8	99709.5	82661.6	82202.5	76365.6	141977	85300.1	152150	92692.8	112057	120011	83833.2	110640	112333	111349	22.46	92415	91185.5	13.74	1.22	0.28	0.0379176	1.42	0.147066	1.09676	271.039	311.3	5.2	Up
M271T345	312918	337385	392369	327373	365199	350425	260801	293096	679395	871674	789651	634172	517182	550498	595892	170200	601083	615032	35.08	329946	332379	12.57	1.82	0.87	0.0104118	1.98	0.0628046	1.37464	271.075	344.7	5.7	Up
M271T366	48929.4	23206.3	394641	75809.1	12669.5	56615.6	13644.2	17124.9	98768.4	124355	126153	94574.6	60649.9	158399	102848	196163	120239	113601	34.79	80330	36067.8	160.7	1.5	0.58	0.014763	1.83	0.078691	1.29351	271.005	365.5	6.1	Up
M271T532	39519.3	64735.8	90999.9	78693.3	69081.9	58424.5	95747.1	76691.4	49670.7	2888.36	50678.3	37182	32192.8	37078.5	40789.7	60396.9	38859.7	38985.8	44.24	71736.6	72886.7	25.22	0.54	-0.88	0.0029526	2.53	0.0288032	1.15577	271.067	531.8	8.9	Down
M271T550	3162.06	5038.59	2436.46	5824.37	18668.5	3176.35	3147.57	3248.52	41054.4	95996.2	72077	2081.76	82227.5	28009.6	69046.7	165471	69495.6	70561.9	71.24	5587.8	3212.44	96.73	12.44	3.64	0.0104118	1.98	0.0628046	1.77597	271.101	550.5	9.2	Up
M271T661	311556	176669	387368	13633.1	283275	237456	221309	125778	35963.1	18101.9	6773.92	22320.8	4261.58	95133.6	17896.2	14344	26849.4	17999.1	108.97	219630	229382	52.78	0.12	-3.03	0.004662	2.33	0.0380456	1.79813	271.061	661.2	11	Down
M271T809	1.43195e+06	1.12799e+06	989064	1.07781e+06	895552	1.10463e+06	982048	1.46902e+06	2.62924e+06	1.77897e+06	2.08228e+06	3.14392e+06	1.91181e+06	1.77572e+06	2.51056e+06	3.4481e+06	2.41008e+06	2.29642e+06	26.39	1.13476e+06	1.09122e+06	18.43	2.12	1.09	0.0001554	3.81	0.00449411	2.03568	271.227	809.1	13.5	Up
M271T84	3.45313e+06	2.92212e+06	2.8244e+06	2.53583e+06	2.49404e+06	2.15598e+06	3.44435e+06	3.54876e+06	3.80763e+06	4.30501e+06	3.57601e+06	3.6808e+06	3.56285e+06	3.48309e+06	3.40931e+06	4.08162e+06	3.73829e+06	3.62841e+06	8.32	2.92233e+06	2.87326e+06	17.72	1.28	0.36	0.0018648	2.73	0.0213197	1.69046	270.879	83.7	1.4	Up
M271T86	1.40932e+08	1.11403e+08	4.39847e+08	3.65646e+08	1.62533e+08	3.52788e+08	1.60018e+08	4.75467e+08	1.72164e+08	6.35106e+07	1.46727e+08	1.23661e+08	3.71645e+08	8.36885e+07	9.38563e+07	7.9023e+07	1.41784e+08	1.08758e+08	70.45	2.76079e+08	2.57661e+08	53.42	0.51	-0.96	0.0498834	1.3	0.173853	1.23026	271.003	86.1	1.4	Down
M271T89	9.87446e+06	8.48711e+06	1.45376e+07	8.38104e+06	6.75521e+06	4.58672e+06	1.0763e+07	1.52313e+07	4.1029e+06	2.60519e+06	5.72247e+06	1.96637e+07	5.23863e+06	5.01664e+06	2.1429e+06	3.68526e+06	6.02222e+06	4.55977e+06	93.87	9.82706e+06	9.18079e+06	37.1	0.61	-0.71	0.0281274	1.55	0.119973	1.20519	271.103	88.7	1.5	Down
M272T103	224426	142220	391334	226196	240646	217727	293763	218721	1.04543e+06	993910	1.28619e+06	1.04446e+06	1.13127e+06	1.02602e+06	1.34748e+06	1.06332e+06	1.11726e+06	1.05437e+06	11.65	244379	225311	29.58	4.57	2.19	0.0001554	3.81	0.00449411	2.27164	272.026	102.6	1.7	Up
M272T122	114264	71803.7	127666	79591.5	289430	149517	307314	237360	379770	397995	445609	409351	353746	319047	360776	332304	374825	370273	11.19	172118	138591	54.13	2.18	1.12	0.0001554	3.81	0.00449411	1.82386	272.06	121.6	2	Up
M272T393	135764	135757	464993	104690	259050	380536	447980	511118	44183	35112.1	73867.8	146611	83123.3	65907.5	26677.8	57876.2	66669.8	61891.9	56.38	304986	319793	54.55	0.22	-2.19	0.0010878	2.96	0.0151734	1.84078	272.024	392.7	6.5	Down
M272T550	287.82	798.486	692.289	4273.73	621.945	281.782	286.144	2813.67	1862.49	6580.77	4726.56	9314.03	13061.6	4460.38	4077.92	2366.25	5806.25	4593.47	64.74	1256.98	657.12	117.57	4.62	2.21	0.0029526	2.53	0.0288032	1.76614	272.096	549.7	9.2	Up
M272T81_1	3.05649e+06	3.97986e+06	3.46003e+06	4.61732e+06	3.40233e+06	1.48507e+06	3.07062e+06	3.95996e+06	2.35123e+06	121735	411637	3.45582e+06	3.24331e+06	80411	391398	1.14986e+06	1.40068e+06	780751	100.83	3.37896e+06	3.43118e+06	27.46	0.41	-1.27	0.0104118	1.98	0.0628046	1.39495	272.043	80.6	1.3	Down
M273T128	3.46813e+07	2.34136e+07	2.85902e+07	2.82587e+07	2.63474e+07	2.16863e+07	3.85796e+07	7.1545e+07	5.68582e+07	6.05793e+07	4.1733e+07	4.41281e+07	7.54351e+07	5.11521e+07	4.72764e+07	6.00059e+07	5.4646e+07	5.40051e+07	20.1	3.41377e+07	2.84244e+07	47.17	1.6	0.68	0.00699301	2.16	0.0487438	1.63477	273.145	127.9	2.1	Up
M273T163	591300	270975	333151	245883	885505	210723	630475	625190	957995	960951	927325	741039	756828	840049	902565	772913	857458	871307	10.69	474150	462226	51.22	1.81	0.85	0.0018648	2.73	0.0213197	1.69651	273.073	162.7	2.7	Up
M273T190	1.05328e+07	4.89364e+06	4.25608e+06	1.72756e+07	3.25241e+06	6.46309e+06	1.72393e+07	1.84351e+07	139049	1.67621e+06	284963	178878	472597	217868	383579	496286	481178	334271	104.04	1.02935e+07	8.49792e+06	62.87	0.05	-4.42	0.0001554	3.81	0.00449411	2.10689	273.145	190	3.2	Down
M273T338	1.83817e+06	3.54036e+06	1.88769e+06	2.39363e+06	1.69586e+06	1.22814e+06	1.84726e+06	2.36238e+06	2.33011e+06	627999	1.35771e+06	1.09276e+06	1.35908e+06	1.6671e+06	2.09479e+06	1.06328e+06	1.4491e+06	1.3584e+06	38.75	2.09919e+06	1.86748e+06	32.86	0.69	-0.53	0.0498834	1.3	0.173853	1.15271	273.091	337.9	5.6	Down
M273T374_2	69954.5	133291	156810	126536	237906	181961	88768.8	212938	1.81979e+06	2.40196e+06	1.93018e+06	482546	1.81139e+06	1.16983e+06	2.01141e+06	206641	1.47922e+06	1.81559e+06	52.82	151020	145050	38.56	9.79	3.29	0.000621601	3.21	0.0104451	1.97427	273.134	374	6.2	Up
M273T69	119744	130981	107733	113740	101964	255388	31383.9	123298	126564	294623	168086	168889	221359	192028	179815	201514	194110	185921	25.38	123029	116742	50.25	1.58	0.66	0.0104118	1.98	0.0628046	1.19307	273.062	69.1	1.2	Up
M273T71	7.80121e+06	7.75314e+06	6.46745e+06	6.79312e+06	6.14715e+06	5.70571e+06	6.65756e+06	6.83755e+06	2.87576e+06	810985	1.85095e+06	2.49198e+06	2.28451e+06	3.11668e+06	1.30949e+06	3.97514e+06	2.33944e+06	2.38825e+06	43.44	6.77036e+06	6.72534e+06	10.68	0.35	-1.53	0.0001554	3.81	0.00449411	1.9867	273.005	71.4	1.2	Down
M274T100	1.90892e+06	1.47471e+06	2.5734e+06	2.20036e+06	1.88963e+06	875294	609579	3.07045e+06	3.75034e+06	4.038e+06	4.35029e+06	3.74188e+06	3.40384e+06	3.64995e+06	3.55431e+06	3.74024e+06	3.77861e+06	3.74106e+06	7.78	1825293	1.89927e+06	45.2	2.07	1.05	0.0001554	3.81	0.00449411	1.78774	274.149	99.5	1.7	Up
M274T354	70720.5	59054.1	63972.5	51153.6	38448.9	54712.1	54881.7	47678.4	71825.9	79665	64121.4	45436.5	56459.3	127559	109853	106564	82685.6	75745.4	35.02	55077.7	54796.9	17.98	1.5	0.59	0.0281274	1.55	0.119973	1.2943	274.166	354.2	5.9	Up
M274T410	411744	185565	327878	152651	496281	372774	565468	259649	77427.1	14805.5	29004.7	159877	197954	247673	6627.7	172844	113276	118652	82.01	346501	350326	41.78	0.33	-1.61	0.004662	2.33	0.0380456	1.50808	274.08	410.3	6.8	Down
M274T724	49765.3	267806	93221.4	18012.3	18900.6	13614.3	40768.4	89455.8	3874.25	138895	13395.7	23677.2	4696.6	12441.1	6420.25	9238.7	26579.8	10839.9	172.4	73943.1	45266.9	113.93	0.36	-1.48	0.0206682	1.68	0.0984557	1.25927	274.13	724	12.1	Down
M274T74	3.18166e+07	4.31811e+07	5.01829e+07	4.67105e+07	2.92729e+07	1.89901e+07	1.92403e+06	1.33285e+07	4.58982e+06	7.78671e+06	5.23835e+06	5.71964e+06	1.43243e+06	1.88135e+07	4.60743e+06	5.43645e+06	6.70304e+06	5.3374e+06	77.56	2.94258e+07	3.05447e+07	58.14	0.23	-2.13	0.0104118	1.98	0.0628046	1.5018	274.024	74	1.2	Down
M274T89	915858	786361	891721	894646	927747	788737	909313	934007	1.20885e+06	1.56896e+06	1.07575e+06	1.02522e+06	1.04132e+06	1.31751e+06	1.21318e+06	1.40544e+06	1.23203e+06	1.21101e+06	15.5	881049	901979	6.75	1.4	0.48	0.0001554	3.81	0.00449411	1.93781	274.09	89.4	1.5	Up
M274T91	393937	484072	458703	428143	406261	427574	484565	485406	412544	419554	448266	390329	401668	387456	351386	456999	408525	407106	8.35	446083	443423	8.3	0.92	-0.13	0.0498834	1.3	0.173853	1.09312	274.14	90.6	1.5	Down
M275T394	10382.6	2650.33	26250.8	29002.4	29849.3	3669.06	5927.49	20225.4	58612	78574	60244.4	28324.3	77829.4	47900.1	30558.1	78891.2	57616.7	59428.2	35.89	15994.7	15304	72.72	3.6	1.85	0.000621601	3.21	0.0104451	1.79083	275.042	394.2	6.6	Up
M275T559	290321	259289	222425	279770	277393	207155	333101	269817	154620	149460	268452	234312	133050	87221.5	125147	114992	158407	141255	38.96	267409	273605	14.7	0.59	-0.76	0.0029526	2.53	0.0288032	1.64557	274.976	559.3	9.3	Down
M275T662	111181	100967	82805	48194.2	191198	128459	113815	87133.8	169080	222067	109925	104310	338216	167821	179808	181499	184091	174444	39.8	107969	106074	38.48	1.71	0.77	0.0379176	1.42	0.147066	1.34052	275.128	662.2	11	Up
M275T663	8369.63	39740.7	31488.3	96641.9	64914.7	29645.2	54794.3	6331.32	958870	1.59517e+06	1.27032e+06	48593	725989	339820	1.58319e+06	1.14977e+06	958965	1.05432e+06	58.38	41490.8	35614.5	72.56	23.11	4.53	0.0010878	2.96	0.0151734	1.95269	275.143	662.9	11	Up
M275T719	309376	234217	288332	356532	112381	41375.7	330556	359126	540460	418908	271346	427258	647905	398361	311201	741125	469570	423083	34.56	253987	298854	46.43	1.85	0.89	0.0104118	1.98	0.0628046	1.37834	274.976	718.5	12	Up
M275T729	45532.6	41912.8	34691.5	47003.8	34441.6	18658	34305	21512.8	313471	117979	326106	178874	259408	332929	375765	555153	307461	319788	42.9	34757.3	34566.5	29.82	8.85	3.15	0.0001554	3.81	0.00449411	2.20217	275.142	729.1	12.2	Up
M276T122_1	1.14056e+06	836592	982755	211411	876861	606210	866157	969203	1.48838e+06	1.04528e+06	942890	1.19189e+06	1.6602e+06	1.1881e+06	1.44329e+06	1.1732e+06	1.26665e+06	1.19e+06	19.1	811219	871509	35.26	1.56	0.64	0.0018648	2.73	0.0213197	1.33586	276.055	122.1	2	Up
M276T295	202143	305925	190726	334397	343334	181128	197325	174517	167017	119989	314107	240139	150205	84427.8	89207.1	131067	162020	140636	48.62	241187	199734	30.29	0.67	-0.57	0.0281274	1.55	0.119973	1.20746	276.109	295.2	4.9	Down
M276T353	33348.9	12291.8	41833	38827	9965.85	19922.9	50469.7	39039.3	29341.6	48817.9	63370.3	56072.3	69129.7	45616.5	40728.3	53768.2	50855.6	51293.1	24.91	30712.3	36088	48.33	1.66	0.73	0.014763	1.83	0.078691	1.41367	276.135	352.7	5.9	Up
M276T354	1.5062e+06	1.48612e+06	1.82631e+06	1.29259e+06	2.52244e+06	2.33217e+06	1.83028e+06	1.76172e+06	988160	953286	1.4147e+06	1.57653e+06	1.03991e+06	1.5269e+06	1.19954e+06	963278	1.20779e+06	1.11973e+06	21.72	1.81973e+06	1.79401e+06	23.2	0.66	-0.59	0.00699301	2.16	0.0487438	1.64873	276.088	354.1	5.9	Down
M276T421	13259.9	15156.1	13200	18036.5	13814.6	11865.6	14473.2	14212.4	17010.8	111693	20957.8	14751	19914.2	58772.9	66981.6	45249.9	44416.4	33103.8	76.23	14252.3	14013.5	12.76	3.12	1.64	0.0010878	2.96	0.0151734	1.52551	276.107	421.1	7	Up
M276T74	1.12882e+07	3.64826e+06	9.02402e+06	8.90781e+06	1.82384e+06	7.66046e+06	4.98011e+06	9.59159e+06	7.33811e+06	1.25245e+07	1.13197e+07	8.48804e+06	9.62787e+06	1.30233e+07	9.87643e+06	1.32915e+07	1.06862e+07	1.05981e+07	20.58	7.11553e+06	8.28413e+06	46.09	1.5	0.59	0.0281274	1.55	0.119973	1.22241	276.024	73.9	1.2	Up
M276T85	4.94382e+06	4.26638e+06	6.15358e+06	4.90416e+06	3.7009e+06	2.84007e+06	183275	181032	9.48498e+06	3.78962e+07	8.31563e+06	5.76283e+06	8.05669e+06	1.6382e+07	1.58614e+07	2.22885e+07	1.5506e+07	1.26732e+07	68.36	3.39665e+06	3.98364e+06	64.97	4.57	2.19	0.0003108	3.51	0.00655521	1.49036	275.956	85	1.4	Up
M277T123	1.82941e+06	1.41044e+06	1.47437e+06	1.39835e+06	2.49316e+06	2.07057e+06	958500	1.79683e+06	627579	371900	846972	987036	605567	1.27867e+06	1.15901e+06	1.49986e+06	922075	917004	41.33	1.67895e+06	1.6356e+06	28.16	0.55	-0.86	0.00699301	2.16	0.0487438	1.55741	277.05	123.4	2.1	Down
M277T126	239621	207217	245469	304663	226842	63143.1	238479	83715.1	330696	395055	453806	439261	179638	314834	343677	277266	341779	337187	26.22	201144	232661	41.63	1.7	0.76	0.00699301	2.16	0.0487438	1.42122	277.021	125.5	2.1	Up
M277T257	41931.8	48621.5	52175.4	33066.7	62805.1	49758.9	53593.5	51298	42463	45968.1	42654.5	37775.9	31172.8	49215.6	42089.2	24173.4	39439.1	42276.1	20.75	49156.3	50528.4	17.72	0.8	-0.32	0.0379176	1.42	0.147066	1.16954	276.993	256.9	4.3	Down
M277T320	3.12385e+06	955804	1.0365e+07	1.07399e+06	1.36783e+06	1.64712e+06	3.08428e+06	2.02823e+06	1.85187e+07	1.09261e+07	1.39138e+07	2.55018e+07	2.60631e+07	1.7457e+07	1.84169e+06	1.0676e+07	1.56123e+07	1.56854e+07	51.79	2.95576e+06	1.83768e+06	105.12	5.28	2.4	0.0018648	2.73	0.0213197	1.78428	277.06	319.7	5.3	Up
M277T329_1	1.73835e+06	1.92976e+06	1.68466e+06	6.57627e+06	5.07535e+06	4.42002e+06	4.77983e+06	4.24309e+06	4.69756e+06	1.53839e+07	1.26262e+07	3.45545e+06	3.96681e+06	1.43582e+07	1.49782e+07	1.61923e+07	1.07073e+07	1.34922e+07	52.52	3.80592e+06	4.33155e+06	47.73	2.81	1.49	0.0498834	1.3	0.173853	1.51189	277.06	329.3	5.5	Up
M277T363	66728.7	42066	51995.5	44728.3	36914.5	12077.9	69689.6	72397.5	87451	111898	80033.7	76209.9	106372	84674.8	77580.1	147921	96517.5	86062.9	25.5	49574.8	48361.9	40.86	1.95	0.96	0.0001554	3.81	0.00449411	1.66008	277.015	363.3	6.1	Up
M277T374	1.55952e+06	611740	1.38543e+06	581392	1.43245e+06	1.02524e+06	1.78611e+06	1.02062e+06	476449	239083	200427	479968	805866	976646	126888	927787	529139	478209	63.69	1.17531e+06	1.20533e+06	37.33	0.45	-1.15	0.004662	2.33	0.0380456	1.47595	276.996	374.1	6.2	Down
M277T528	17158.3	2793.27	157072	20048.8	36271.5	1549.86	69889.6	19151.3	133213	163295	120255	85265.1	187210	185724	196501	142793	151782	153044	25.37	40491.9	19600.1	128.08	3.75	1.91	0.0018648	2.73	0.0213197	1.7496	277.121	528.3	8.8	Up
M277T719	3.23676e+06	2.02024e+07	3.2584e+06	1.02454e+07	2.79624e+06	2.34892e+06	1.29516e+06	3.07678e+06	2.1565e+06	822091	1.08106e+06	2.05819e+06	1.61284e+06	2.22516e+06	395304	1.95961e+06	1.53884e+06	1.78623e+06	44.86	5.80752e+06	3.15677e+06	110.61	0.26	-1.92	0.0029526	2.53	0.0288032	1.45052	277.144	718.7	12	Down
M277T74	2.09374e+06	1.7829e+06	1.58082e+06	2.37176e+06	1.27043e+06	963571	1.49151e+06	1.75346e+06	2.67979e+06	2.90681e+06	2.84812e+06	2.25543e+06	2.28142e+06	1.89438e+06	1.87508e+06	2.84926e+06	2.44879e+06	2.4806e+06	17.5	1.66352e+06	1.66714e+06	26.79	1.47	0.56	0.004662	2.33	0.0380456	1.63102	277.024	73.8	1.2	Up
M277T747	1.24249e+06	2.07119e+06	1.07418e+06	897911	1.45802e+06	1.97613e+06	1.30229e+06	1.92059e+06	3.60018e+06	2.28761e+06	2.22607e+06	2.40562e+06	2.90153e+06	3.41368e+06	2.36445e+06	2.08641e+06	2.66069e+06	2.38504e+06	21.63	1.49285e+06	1.38016e+06	29.75	1.78	0.83	0.0001554	3.81	0.00449411	1.71973	277.144	747.4	12.5	Up
M278T122	1.41399e+07	1.14416e+07	1.11274e+07	8.05318e+06	4.47787e+06	9.07114e+06	1.10739e+07	1.50664e+07	764467	365015	948528	7.89401e+06	551198	8.4254e+06	585263	973962	2.56348e+06	856497	135.09	1.05564e+07	1.11007e+07	32.02	0.24	-2.04	0.0010878	2.96	0.0151734	1.82219	278.124	121.7	2	Down
M278T158	869459	24572.7	89298.1	181281	1.82498e+06	698394	1.05244e+06	21036.2	968619	1.78e+06	2.34961e+06	1.49739e+06	186017	1.10664e+06	1.70485e+06	1.84862e+06	1.43022e+06	1.60112e+06	46.44	595183	439837	107.95	2.4	1.26	0.0206682	1.68	0.0984557	1.25771	278.034	158.4	2.6	Up
M278T215	25139.5	42297.5	18620.4	49351.7	7585.34	26600.6	31995.1	88759	31654.8	474870	129470	80253.6	52014.4	359985	429374	436243	249233	244728	77.29	36293.7	29297.8	68.55	6.87	2.78	0.004662	2.33	0.0380456	1.63826	278.034	214.8	3.6	Up
M278T276	522289	194449	525968	163132	401570	613977	554739	551435	514650	586326	679875	677711	529868	1.37516e+06	930443	1.03585e+06	791235	678793	37.98	440945	524129	39.13	1.79	0.84	0.014763	1.83	0.078691	1.41129	278.035	276.2	4.6	Up
M278T306	663641	695012	718247	545860	330061	231633	709235	805632	289980	147043	303264	955278	266089	342276	20721.7	181859	313314	278035	89.17	587415	679326	34.74	0.53	-0.91	0.0498834	1.3	0.173853	1.17516	278.034	306.1	5.1	Down
M278T329	1.72706e+06	1.72692e+06	1.65525e+06	1.60966e+06	1.48313e+06	947411	2.1446e+06	1.65162e+06	1.07633e+06	12860.1	1.15752e+06	1.51814e+06	854057	279094	346136	72612.8	664593	600097	84.4	1.61821e+06	1.65344e+06	20.52	0.41	-1.28	0.0018648	2.73	0.0213197	1.30597	278.063	329.3	5.5	Down
M278T398	107286	222031	102336	67713	110588	118951	151432	152032	86823	87707.5	122398	18469.4	82785.1	51207.7	105666	62786.3	77230.4	84804.1	42.16	129046	114770	35.95	0.6	-0.74	0.0206682	1.68	0.0984557	1.22852	278.106	398	6.6	Down
M278T408_1	14562.9	3366.73	3085.22	15354.6	31837.5	20215.3	23531.8	13283.4	22358.4	27521.6	29128.2	32319	19912.4	69897.3	140265	27576.1	46122.2	28352.2	89.2	15654.7	14958.8	62.06	2.95	1.56	0.0104118	1.98	0.0628046	1.40639	278.049	408.3	6.8	Up
M278T648	174113	498560	656889	735818	465050	261520	165047	586988	577820	815598	462220	529700	798483	666330	701600	1.01807e+06	696228	683965	25.79	442998	481805	49.62	1.57	0.65	0.0498834	1.3	0.173853	1.26492	278.142	647.6	10.8	Up
M278T85	935236	914932	869203	893727	918204	925218	866919	1.048e+06	1.01154e+06	956187	1.12189e+06	1.07823e+06	1.02299e+06	1.08251e+06	1.01891e+06	958190	1.03131e+06	1.02095e+06	5.75	921430	916568	6.19	1.12	0.16	0.0029526	2.53	0.0288032	1.67167	277.953	84.7	1.4	Up
M278T86	1.31943e+06	1.39789e+06	1.96528e+06	1.75267e+06	1.50576e+06	2.62568e+06	1.73137e+06	1.34123e+06	1.95976e+06	5.57729e+06	1.46563e+06	1.83406e+06	2.38323e+06	2.39538e+06	2.5998e+06	4.18763e+06	2.80035e+06	2.3893e+06	49.47	1.70491e+06	1.61856e+06	25.6	1.64	0.72	0.0379176	1.42	0.147066	1.21362	278.041	85.8	1.4	Up
M279T100	16955.8	1042.91	44188	15044.5	15951.2	27587.4	21385.3	16666.5	28178.3	32901.7	22988.7	29979.8	27894.7	59781.4	21342.2	54624.7	34711.4	29079	41.55	19852.7	16811.1	62.13	1.75	0.81	0.014763	1.83	0.078691	1.11073	279.083	100.1	1.7	Up
M279T148	89919.7	104753	106163	103944	128530	135399	127425	95810	99455.9	81824.6	86735.9	86247.4	66356.5	100045	115406	71945.8	88502.1	86491.7	18.09	111493	105458	15	0.79	-0.33	0.014763	1.83	0.078691	1.44324	279.098	147.6	2.5	Down
M279T158	952059	924848	1.0692e+06	782269	1.20003e+06	1.03684e+06	784985	1.20638e+06	775961	905066	776946	823473	1.01935e+06	562201	847564	483103	774208	800210	22.62	994576	994448	16.57	0.78	-0.36	0.0206682	1.68	0.0984557	1.28544	279.038	157.7	2.6	Down
M279T303	393269	777721	463977	973813	357764	519804	307774	578890	129950	7597.04	231921	163236	21928.8	149296	157589	134677	124524	141987	60	546626	491890	41.53	0.23	-2.13	0.0001554	3.81	0.00449411	1.68087	279.037	303.1	5.1	Down
M279T38	444744	326796	456996	344937	325060	186822	314461	576645	120437	30077	118723	698354	104701	140739	45704.8	70368.1	166138	111712	131.52	372058	335867	31.64	0.45	-1.16	0.0104118	1.98	0.0628046	1.55122	278.852	38.3	0.6	Down
M279T55	440871	218211	379014	268694	429520	265002	170293	127600	70390.5	18191.3	117119	146583	152236	352706	23825.4	81300.4	120294	99209.4	88.58	287401	266848	40.97	0.42	-1.26	0.00699301	2.16	0.0487438	1.46876	278.852	55.1	0.9	Down
M279T70	321729	411000	389270	348183	258700	376958	634424	355847	529412	483960	557491	380660	357026	460498	548638	570982	486084	506686	16.77	387014	366402	28.49	1.26	0.33	0.0498834	1.3	0.173853	1.22062	279.029	69.6	1.2	Up
M279T799	142141	166827	536066	115094	316962	111554	1.51711e+06	533080	575647	2.26388e+06	879987	516518	337810	484949	875070	679523	826673	627585	73.83	429855	241895	110.14	1.92	0.94	0.0498834	1.3	0.173853	1.31185	279.173	799.5	13.3	Up
M279T812	8.09309e+07	1.37818e+08	1.82936e+07	8.9618e+07	2.25344e+07	6.67798e+07	1.22516e+08	4.32481e+07	1.16373e+08	1.24529e+08	1.04946e+08	5.6551e+07	8.42243e+07	4.49743e+08	6.93285e+08	3.42485e+08	2.46517e+08	1.20451e+08	92.55	7.27174e+07	7.38554e+07	60.29	3.39	1.76	0.0498834	1.3	0.173853	1.29155	279.229	811.9	13.5	Up
M279T83	4.64884e+06	5.24018e+06	4.09341e+06	1.69179e+06	2.79249e+06	3.5943e+06	3.80252e+06	4.97742e+06	2.54505e+06	1.71286e+06	2.52086e+06	1.96682e+06	3.30995e+06	2.92304e+06	1.86793e+06	2.06003e+06	2.36332e+06	2.29044e+06	23.64	3.85512e+06	3.94797e+06	30.61	0.61	-0.71	0.0206682	1.68	0.0984557	1.45361	278.829	82.9	1.4	Down
M279T837	4.35605e+08	8.67896e+07	1.01093e+08	1.98849e+08	9.59837e+07	1.07741e+08	1.1972e+08	4.12369e+08	4.21072e+08	3.59133e+08	2.32023e+08	4.10327e+08	6.79814e+08	3.95438e+08	5.38968e+08	9.6136e+08	4.99767e+08	4.157e+08	45.6	1.94769e+08	1.1373e+08	74.85	2.57	1.36	0.014763	1.83	0.078691	1.69372	279.231	837.2	14	Up
M280T107	291945	296836	258385	386456	305259	183781	207003	231240	196798	104555	237255	192480	212697	121993	83166.8	176812	165720	184646	33.52	270113	275165	23.85	0.61	-0.7	0.00699301	2.16	0.0487438	1.4901	280.07	107.4	1.8	Down
M280T69	1.07785e+06	1.05224e+06	1.12539e+06	1.02931e+06	1.08757e+06	1.04896e+06	1.05502e+06	1.04591e+06	1.1008e+06	4.2725e+06	3.93887e+06	3.3119e+06	5.33522e+06	3.92792e+06	5.60825e+06	6.31102e+06	4.22581e+06	4.10568e+06	38.22	1.06528e+06	1.05363e+06	2.86	3.97	1.99	0.0003108	3.51	0.00655521	2.03145	280.014	68.9	1.1	Up
M280T741	2.39316e+07	1.9938e+07	1.08164e+07	1.28442e+07	2.22963e+07	1.36015e+07	1.88834e+07	1.72967e+07	8.22617e+06	4.64399e+06	1.43969e+07	4.04384e+06	1.51511e+07	1.28527e+07	1.19146e+07	4.0099e+06	9.4049e+06	1.00704e+07	50.52	1.7451e+07	1.80901e+07	26.86	0.54	-0.89	0.014763	1.83	0.078691	1.47611	280.236	741.1	12.4	Down
M280T782	3.97461e+08	3.20503e+08	3.20291e+08	1.80561e+08	1.82211e+08	1.95227e+08	2.76582e+08	2.9504e+08	1.85213e+08	4.4325e+07	1.49489e+08	1.2758e+08	1.7978e+08	3.10174e+07	3.81129e+07	5.73678e+07	1.01611e+08	9.24737e+07	64.77	2.70985e+08	2.85811e+08	29.02	0.37	-1.42	0.000621601	3.21	0.0104451	1.67855	280.236	781.6	13	Down
M280T80	3.9433e+07	4.14383e+07	3.7925e+07	4.02365e+07	3.54147e+07	3.9239e+07	4.03722e+07	4.7254e+07	3.89175e+07	6.05781e+07	6.28105e+07	5.56722e+07	4.57706e+07	5.30605e+07	6.54844e+07	7.43314e+07	5.70782e+07	5.81252e+07	19.75	4.01641e+07	3.98347e+07	8.46	1.42	0.51	0.00699301	2.16	0.0487438	1.77736	280.035	80.3	1.3	Up
M280T810	2.99722e+07	1.23267e+08	2.07047e+07	1.56999e+07	3.29532e+07	2.60938e+07	1.832e+07	2.18699e+07	3.2985e+06	5.45207e+06	1.45583e+07	2.72673e+07	2.54985e+06	1.15479e+07	1.89605e+06	4.89512e+06	8.93314e+06	5.1736e+06	96.95	3.61101e+07	2.39818e+07	98.84	0.25	-2.02	0.0029526	2.53	0.0288032	1.69215	280.236	809.9	13.5	Down
M281T125	1.24681e+07	9.69415e+06	1.60169e+07	9.07578e+06	8.2039e+06	8.73593e+06	1.63188e+07	1.41555e+07	8.46637e+06	4.74395e+06	943191	1.32373e+07	6.37896e+06	4.74172e+06	250064	4.24194e+06	5.37543e+06	4.74283e+06	77.14	1.18336e+07	1.10811e+07	28.27	0.45	-1.14	0.004662	2.33	0.0380456	1.35108	281.038	124.7	2.1	Down
M281T149	195726	158440	183306	193727	187746	181969	203961	240506	223030	175780	239437	236198	215759	253173	262485	260822	233336	237818	12.31	193172	190736	12.1	1.21	0.27	0.0281274	1.55	0.119973	1.51859	280.961	148.6	2.5	Up
M281T152	809157	2.25193e+06	759692	937903	365452	669464	659967	488990	121709	10631.7	682990	836702	136836	154481	6912.62	404004	294283	145658	107.03	867820	714578	67.67	0.34	-1.56	0.0281274	1.55	0.119973	1.37087	280.983	151.6	2.5	Down
M281T167	3.78256e+06	1.39866e+06	6.39915e+06	4.91573e+06	985500	5.96805e+06	4.97243e+06	5.95725e+06	7.2311e+06	2.00634e+07	1.0081e+07	7.67484e+06	7.71014e+06	1.44049e+07	1.1988e+07	1.80204e+07	1.21467e+07	1.10345e+07	40.62	4.29742e+06	4.94408e+06	48.52	2.83	1.5	0.0001554	3.81	0.00449411	1.69619	281.036	166.7	2.8	Up
M281T414	51969.2	59714.2	61672.9	51819	61192	46234.7	59516.2	48143.1	47475.7	60383.1	72354.5	83473.7	65812.4	58387.2	68246.7	71369.3	65937.8	67029.6	16.34	55032.7	55742.7	11.26	1.2	0.26	0.0498834	1.3	0.173853	1.31827	281.114	414	6.9	Up
M281T421	37610.2	26733	41346.9	41971.8	16891.3	29236.9	43188.6	37608.3	48118.5	42072.4	58686.2	44458.1	65666.7	36581.8	34272.8	68222.4	49759.9	46288.3	26.06	34323.4	37609.3	26.87	1.45	0.54	0.0281274	1.55	0.119973	1.40025	281.059	420.5	7	Up
M281T779	3.86444e+06	7.58145e+06	5.22978e+06	4.04909e+06	1.37057e+06	1.31705e+06	7.50924e+06	8.83427e+06	1.41816e+07	3.44962e+06	6.30088e+06	1.27817e+07	1.21616e+07	1.3249e+07	4.18056e+06	1.45875e+07	1.01116e+07	1.24717e+07	46.06	4.96949e+06	4.63943e+06	57.24	2.03	1.02	0.0498834	1.3	0.173853	1.26466	281.255	778.7	13	Up
M281T782	3.80636e+07	2.4926e+07	2.69514e+07	2.97443e+07	1.32008e+07	9.70668e+06	3.57138e+07	3.94111e+07	7.31332e+07	6.60707e+07	4.62007e+07	5.9699e+07	6.28042e+07	3.41304e+07	3.35209e+07	1.08061e+08	6.04525e+07	6.12516e+07	39.97	2.72147e+07	2.83478e+07	40.57	2.22	1.15	0.004662	2.33	0.0380456	1.68183	281.241	781.6	13	Up
M281T820	4.39988e+07	2.43221e+07	2.44802e+07	2.40509e+07	1.57168e+07	5.01075e+06	2.74793e+07	7.98232e+07	4.96014e+07	7.61891e+07	6.59553e+07	5.6702e+07	6.41992e+07	2.75951e+07	2.67341e+07	6.55233e+07	5.40624e+07	6.04506e+07	33.81	3.06103e+07	2.44011e+07	74.17	1.77	0.82	0.0281274	1.55	0.119973	1.34364	281.247	819.8	13.7	Up
M282T457	5624.13	16881.2	6601.59	6582.09	5275.19	3420.74	5835.69	10566.7	38885.9	302597	75261.3	12437.7	29451.6	10314.4	65710.5	48648.6	72913.4	43767.3	131.16	7598.42	6208.89	56.03	9.6	3.26	0.0010878	2.96	0.0151734	1.79048	282.044	457.3	7.6	Up
M282T680	90891.8	186724	240041	269165	238038	278303	167100	49827.2	45613.2	139799	63162.6	52510.9	56540.6	161352	49411.3	47159	76943.6	54525.7	59.97	190011	212381	43.98	0.4	-1.3	0.00699301	2.16	0.0487438	1.5779	282.207	680.3	11.3	Down
M282T808	282829	190689	203068	736199	256679	1.0392e+06	436243	196519	452311	1.06362e+06	506846	370699	638789	835858	3.28924e+06	660704	977258	649746	98.24	417678	269754	74.55	2.34	1.23	0.0379176	1.42	0.147066	1.2016	282.215	807.7	13.5	Up
M282T91	251241	211863	227153	176024	232024	214567	163814	199955	295713	311406	340735	258187	254050	256502	306470	275673	287342	285693	10.94	209580	213215	13.84	1.37	0.46	0.0001554	3.81	0.00449411	1.86868	282.108	90.5	1.5	Up
M282T98	336939	425561	409110	348731	567122	431538	631398	492818	463396	212686	431195	426490	281844	191814	245725	159968	301640	263784	40.04	455402	428550	22.56	0.66	-0.59	0.0498834	1.3	0.173853	1.36491	282.048	98.3	1.6	Down
M283T288	1.03751e+08	8.34018e+07	6.06915e+07	8.084e+07	7.46297e+07	4.86429e+07	6.63791e+07	7.13985e+07	6.26391e+07	1.35622e+06	5.5463e+07	7.75329e+07	3.80389e+07	5.87387e+06	5.31688e+06	7.03892e+06	3.16575e+07	2.25389e+07	96.66	7.37168e+07	7.30141e+07	22.38	0.43	-1.22	0.0104118	1.98	0.0628046	1.38646	283.068	288	4.8	Down
M283T473	729530	2.21429e+06	887981	1.39489e+06	962231	749981	1.3057e+06	827632	2.15905e+06	1.86614e+06	1.3796e+06	1.80924e+06	1.03816e+06	1.49058e+06	1.6471e+06	1.28502e+06	1.58436e+06	1.56884e+06	22.67	1.13403e+06	925106	44.21	1.4	0.48	0.0498834	1.3	0.173853	1.22091	283.083	472.8	7.9	Up
M283T486	82769	5149.99	30349.3	57564.6	318851	19484.5	76547.7	27986.6	287597	494753	439379	15373.3	149230	350975	307625	460237	313146	329300	52.36	77337.9	43957	131.09	4.05	2.02	0.0206682	1.68	0.0984557	1.46295	283.155	486.2	8.1	Up
M283T578	911310	418100	716110	395253	381859	335047	269436	796870	746157	1.13452e+06	494363	1.04104e+06	676394	431307	866574	1.60975e+06	875014	806366	43.89	527998	406677	45.82	1.66	0.73	0.0379176	1.42	0.147066	1.25908	283.155	577.7	9.6	Up
M283T594	642949	646757	453019	1.07668e+06	411796	467850	481836	524197	1.23698e+06	1.48787e+06	964079	591584	554842	1.64978e+06	2.09122e+06	2.90588e+06	1.43528e+06	1.36243e+06	55.18	588135	503016	36.6	2.44	1.29	0.00699301	2.16	0.0487438	1.56574	283.155	593.8	9.9	Up
M283T692	30843.2	28202.9	25411.3	19424.4	14812.6	15600.6	24943.9	21236.8	16203.8	11754.1	18991.9	18820.8	11216.8	14287.7	10632.4	8554.03	13807.7	13020.9	28.26	22559.5	23090.3	25.65	0.61	-0.71	0.004662	2.33	0.0380456	1.56526	283.1	691.9	11.5	Down
M283T710	136839	129583	187470	139439	146321	87564.6	125680	235363	156601	226696	150407	227251	199548	163423	231562	165777	190158	182663	18.36	148532	138139	29.98	1.28	0.36	0.0379176	1.42	0.147066	1.25346	283.228	709.6	11.8	Up
M283T803	1.30352e+08	1.16212e+08	1.62603e+08	6.75183e+06	1.29943e+08	9.3952e+07	1.60137e+08	8.54605e+07	8.14789e+07	5.89036e+07	3.97707e+06	1.15823e+07	2.55007e+07	7.26593e+07	6.2101e+06	6.76859e+07	4.09997e+07	4.22022e+07	79.09	1.10676e+08	1.23077e+08	45.37	0.37	-1.43	0.004662	2.33	0.0380456	1.19818	283.264	803.1	13.4	Down
M283T83	2.18056e+07	1.48412e+07	1.0782e+07	1.60473e+07	1.18971e+07	1.75406e+07	2.31633e+07	2.15903e+07	2.33051e+06	1.30421e+06	1.28531e+06	1.33839e+06	2.72129e+06	4.17375e+06	1.39177e+06	5.12038e+06	2.4582e+06	1.86114e+06	59.97	1.72084e+07	1.6794e+07	27.11	0.14	-2.81	0.0001554	3.81	0.00449411	2.15601	282.776	82.5	1.4	Down
M283T84_1	1.00981e+06	613097	882884	763454	788630	653455	919620	882324	1.25945e+06	1.04627e+06	956119	985413	1.07793e+06	1.35081e+06	1.08681e+06	1.42857e+06	1.14892e+06	1.08237e+06	15.24	814159	835477	16.63	1.41	0.5	0.000621601	3.21	0.0104451	1.80453	282.906	84	1.4	Up
M284T377	1.17904e+06	1.44054e+06	1.31471e+06	1.22791e+06	954686	931379	924493	1.49685e+06	165170	37001.2	226853	1.5243e+06	522838	638767	199887	353113	458491	289983	103.22	1.1837e+06	1.20347e+06	19.33	0.39	-1.37	0.0104118	1.98	0.0628046	1.58532	284.054	376.9	6.3	Down
M284T707_1	157391	134568	53541.5	57269.5	205239	36424.1	55235.9	66972.2	204042	164414	270817	282097	221192	143537	114979	224604	203210	212617	29.07	95830.1	62120.8	64.26	2.12	1.08	0.00699301	2.16	0.0487438	1.63468	284.071	706.9	11.8	Up
M284T712	820822	1.10234e+06	414722	1.00217e+06	307694	785114	277123	451404	249541	58062.6	356854	330197	238550	247931	176959	325894	247999	248736	39.12	645173	618259	49.95	0.38	-1.38	0.004662	2.33	0.0380456	1.57145	284.132	712.5	11.9	Down
M284T765	356687	729264	190057	869482	532328	72650.8	172314	35473.8	1.81633e+06	1.48264e+06	2.24144e+06	439034	561964	307630	1.53006e+06	1.49105e+06	1.23377e+06	1.48685e+06	57.41	369782	273372	84.09	3.34	1.74	0.014763	1.83	0.078691	1.48071	284.223	765.1	12.8	Up
M284T78	1.02132e+06	384763	2.67411e+06	1.1604e+06	1.50738e+06	330754	366096	342605	1.77236e+07	1.68447e+07	1.97729e+07	9.30428e+06	1.11154e+07	9.3757e+06	8.93729e+06	1.60381e+07	1.3639e+07	1.35767e+07	32.29	973428	703041	84.54	14.01	3.81	0.0001554	3.81	0.00449411	2.18126	284.044	78.2	1.3	Up
M284T94	2.10047e+06	1.3312e+06	2.69662e+06	1.98352e+06	1.20681e+06	713752	2.35296e+06	2.52805e+06	596529	36220.7	61719.5	2.57707e+06	532075	1.36102e+06	37587.2	841052	755408	564302	114.99	1.86417e+06	2.042e+06	37.84	0.41	-1.3	0.0281274	1.55	0.119973	1.38369	284.116	94.4	1.6	Down
M285T529	226810	58176	235650	117912	113641	81260.6	227587	114179	50098.9	39757.3	32817.5	50618.6	69170.7	16786.3	38135.4	23543.8	40116.1	38946.4	41.4	146902	116046	48.8	0.27	-1.87	0.0003108	3.51	0.00655521	1.82253	285.129	528.5	8.8	Down
M285T540	18826.6	11991.2	24102.9	27488.5	4058.93	9269.01	2933.4	22158.8	47375.9	505893	266523	191882	327065	205593	205901	582367	291575	236212	60.34	15103.7	15408.9	61.9	19.3	4.27	0.0001554	3.81	0.00449411	2.08136	285.089	539.5	9	Up
M285T662	160130	249123	215169	96578.2	177100	131404	278083	202299	187547	1110.37	132794	137271	158090	50105.3	9318.7	69509.6	93218.3	101152	75.37	188736	189700	31.82	0.49	-1.02	0.0206682	1.68	0.0984557	1.11448	285.077	661.6	11	Down
M285T69	245829	204843	373731	266492	290814	245043	207872	282184	246064	316381	351803	343976	282904	366954	417045	315461	330073	330179	15.9	264601	256161	20.42	1.25	0.32	0.0281274	1.55	0.119973	1.34927	285.072	69.3	1.2	Up
M285T73	24459	36566.7	30063.8	201235	15357.5	200094	35270.1	25246.4	266731	1.91106e+06	472675	1.0206e+06	268188	257347	98407.6	44749.9	542471	267460	116.25	71036.5	32667	113.02	7.64	2.93	0.0018648	2.73	0.0213197	1.53943	284.948	73	1.2	Up
M285T793	4.25444e+06	7.4324e+06	6.72616e+06	8.41929e+06	6.03858e+06	7.1879e+06	3.88658e+06	7.96145e+06	1.06827e+07	4.6634e+07	1.18587e+07	8.46072e+06	1.39642e+07	2.56782e+07	3.02267e+07	2.66251e+07	2.17663e+07	1.98212e+07	59.85	6.48835e+06	6.95703e+06	25.59	3.35	1.75	0.0001554	3.81	0.00449411	1.76937	285.259	792.6	13.2	Up
M285T85	3.53771e+06	2.12448e+06	3.57771e+06	1.77257e+06	3.25955e+06	647378	3.14995e+06	2.28244e+06	428413	332916	1.24266e+06	1.61973e+06	1.15912e+06	550820	931520	541721	850862	741170	54.01	2.54398e+06	2.7162e+06	40.34	0.33	-1.58	0.0018648	2.73	0.0213197	1.58876	284.999	84.8	1.4	Down
M286T301	113689	240354	127662	175255	174012	38857.8	124303	175158	332703	296831	287482	266424	274024	146023	162719	155023	240154	270224	30.66	146161	150837	40.66	1.64	0.72	0.0379176	1.42	0.147066	1.32499	286.038	300.6	5	Up
M286T323	31246	28583.3	37393.9	41675	47839.5	6387.76	30911.1	37281.4	63707.3	75113.2	74052.3	48203.3	67197.2	41423.5	57136.7	44299.7	58891.7	60422	22.42	32664.7	34263.7	37.8	1.8	0.85	0.0010878	2.96	0.0151734	1.52131	286.05	322.7	5.4	Up
M286T377	83185.3	102747	60963	118222	80562	3379.85	40958.8	119676	524905	758818	196057	549892	292368	16146.3	448004	218841	375629	370186	63.46	76211.8	81873.7	52.5	4.93	2.3	0.00699301	2.16	0.0487438	1.39241	286.052	377	6.3	Up
M286T552	1029.48	8815.01	3038.68	929.234	3509.75	1395.79	805.637	2640.99	4694.42	4577.01	6972.3	3032.28	5572.22	4482.46	5581.93	1764.11	4584.59	4635.71	35.03	2770.57	2018.39	95.83	1.65	0.73	0.0498834	1.3	0.173853	1.18132	286.201	551.7	9.2	Up
M286T69	415945	507584	498801	727439	497782	554560	552045	550800	715545	860832	903762	715610	866426	662237	775859	865895	795771	818346	11.33	538120	529192	16.55	1.48	0.56	0.0010878	2.96	0.0151734	1.96036	286.075	69	1.1	Up
M286T87	2.46022e+06	2.44524e+06	3.15119e+06	4.18697e+06	2.8609e+06	1.77412e+06	2.61912e+06	1.90209e+06	3.87585e+06	3.10105e+06	3.69933e+06	6.08866e+06	5.02111e+06	3.65047e+06	2.45884e+06	4.76173e+06	4.08213e+06	3.78759e+06	28.3	2.67498e+06	2.53967e+06	28.46	1.53	0.61	0.0206682	1.68	0.0984557	1.48899	286.101	87.2	1.5	Up
M287T320	1.70578e+07	2.7473e+07	2.22326e+07	2.07151e+07	1.60994e+07	9.52508e+06	1.90338e+07	2.8323e+07	5.6359e+06	716743	5.77504e+06	2.08556e+07	7.67634e+06	4.99539e+06	2.58798e+06	1.22942e+06	6.18405e+06	5.31564e+06	103.49	2.00575e+07	1.98744e+07	30.68	0.31	-1.7	0.0029526	2.53	0.0288032	1.66833	287.088	319.8	5.3	Down
M287T329	1.41614e+07	6.72168e+06	2.1411e+07	8.17889e+06	6.38969e+06	1.41531e+07	7.79356e+06	1.99052e+06	357425	3.57876e+06	142601	7.74664e+06	611128	840768	2.66397e+06	264894	2.02577e+06	725948	129.78	1.01e+07	7.98623e+06	60.44	0.2	-2.32	0.0029526	2.53	0.0288032	1.7264	287.088	329.3	5.5	Down
M287T376	281272	185703	246346	228327	235650	174725	291688	88721.8	453311	251062	425610	820483	502314	292283	396422	335071	434570	411016	40.72	216554	231989	30.36	2.01	1	0.000621601	3.21	0.0104451	1.65186	287.069	375.6	6.3	Up
M287T447	104794	104560	139871	120603	151954	82065.1	175321	172573	239006	635572	271763	172927	288880	118767	286326	149334	270322	255384	59.66	131468	130237	25.87	2.06	1.04	0.014763	1.83	0.078691	1.51899	287.106	447.4	7.5	Up
M287T546	575508	885791	206030	948384	1.02321e+06	74317.2	910820	927049	1.14713e+06	1.37542e+06	2.34039e+06	1.76097e+06	710921	213275	1.54616e+06	1.21456e+06	1.2886e+06	1.29499e+06	50.11	693889	898305	53.02	1.86	0.89	0.0281274	1.55	0.119973	1.04167	287.043	545.8	9.1	Up
M287T583	1.20745e+06	3.35061e+06	1.81693e+06	3.38293e+06	1.1237e+06	1.99835e+06	1.45108e+06	2.11261e+06	358927	790959	816902	736135	666516	593195	499455	542253	625543	629856	25.12	2.05546e+06	1.90764e+06	42.95	0.3	-1.72	0.0001554	3.81	0.00449411	2.02173	287.044	583.3	9.7	Down
M287T601	332670	355419	486995	347574	497643	490040	404849	345508	288643	165156	286791	329426	274118	353926	214014	177519	261199	280454	26.4	407587	380134	17.84	0.64	-0.64	0.0010878	2.96	0.0151734	1.70668	287.058	601.1	10	Down
M287T739	2.74073e+06	895028	1.30253e+06	1.02683e+06	1.15576e+06	1.05023e+06	559052	976998	2.22167e+06	4.68755e+06	8.36149e+06	5.77269e+06	4.71647e+06	2.24944e+06	2.31956e+06	9.54333e+06	4.98402e+06	4.70201e+06	56.33	1.21339e+06	1.03853e+06	53.87	4.11	2.04	0.0010878	2.96	0.0151734	1.91902	287.222	739.1	12.3	Up
M287T759	209461	230414	245184	406448	433333	323813	196116	250835	348759	290106	369629	332112	427630	537045	262547	553109	390117	359194	27.63	286950	248009	31.6	1.36	0.44	0.0498834	1.3	0.173853	1.14691	287.061	758.6	12.6	Up
M288T303_2	140458	117397	87238.6	120874	138930	121236	164173	117181	191214	268870	151932	240780	182092	54895.5	314409	197988	200272	194601	39.25	125936	121055	17.85	1.59	0.67	0.014763	1.83	0.078691	1.07662	288.055	302.7	5	Up
M288T320	32394.9	86746.7	1.20022e+06	91538.2	140650	108981	599565	188788	807221	1.14078e+06	745083	1.21373e+06	773474	1.81675e+06	156111	1.98209e+06	1.0794e+06	974002	55.5	306111	124816	131.52	3.53	1.82	0.00699301	2.16	0.0487438	1.58782	288.092	319.9	5.3	Up
M288T329	1.78636e+06	710126	1.51611e+06	573564	1.70208e+06	1.25145e+06	1.7584e+06	1.16408e+06	556890	239763	220429	575064	741640	1.0283e+06	201548	800315	545493	565977	56.07	1.30777e+06	1.38378e+06	35.99	0.42	-1.26	0.00699301	2.16	0.0487438	1.59855	288.092	329.3	5.5	Down
M288T420	102981	35315.9	114954	149045	61344	43718.9	56592.3	41914.1	127653	94949.4	58254.7	184634	62354.6	126094	141996	177379	121664	126873	39.04	75733.1	58968.1	54.74	1.61	0.68	0.0498834	1.3	0.173853	1.18848	288.091	420.1	7	Up
M288T463	367788	538027	332127	373026	235893	302628	200052	248749	141266	130427	196484	151026	150780	289323	393315	177400	203753	164213	45.01	324786	317378	32.8	0.63	-0.67	0.0206682	1.68	0.0984557	1.42159	288.09	463.4	7.7	Down
M288T550	378280	184948	262813	339629	249971	268884	194049	178892	155980	136308	193719	167477	115374	163480	158808	222531	164210	161144	19.99	257183	256392	28.27	0.64	-0.65	0.0029526	2.53	0.0288032	1.57415	288.09	550	9.2	Down
M289T73	5.57023e+06	5.44395e+06	5.48583e+06	5.55531e+06	5.41095e+06	5.12248e+06	5.07558e+06	5.13529e+06	5.11761e+06	5.57891e+06	5.87353e+06	7.68411e+06	5.63779e+06	7.31183e+06	8.08216e+06	5.29699e+06	6.32287e+06	5.75566e+06	18.58	5.34995e+06	5.42745e+06	3.84	1.18	0.24	0.0379176	1.42	0.147066	1.22292	288.996	72.8	1.2	Up
M289T732	326643	344021	340648	609627	220370	296932	370140	205919	227898	125592	183876	256093	78819.4	319100	240985	183566	201991	205887	37.66	339288	333645	36.6	0.6	-0.75	0.014763	1.83	0.078691	1.3822	289.145	732.4	12.2	Down
M289T77	1.28349e+08	2.91204e+08	1.24186e+08	2.67718e+08	1.57961e+08	8.88501e+07	1.17972e+08	8.09781e+07	9.61453e+07	8.81761e+07	1.07677e+08	9.68716e+07	8.6826e+07	4.383e+07	6.91668e+07	9.10864e+07	8.49724e+07	8.96312e+07	23.43	1.57152e+08	1.26267e+08	50.52	0.54	-0.89	0.0206682	1.68	0.0984557	1.38281	289.033	76.5	1.3	Down
M289T88	1.62668e+06	995127	1.81619e+06	1.49434e+06	795637	2.53621e+06	1.38391e+06	276301	509410	220792	855810	1.66453e+06	337869	387357	287515	399665	582868	393511	82.02	1.36555e+06	1.43912e+06	50.33	0.43	-1.23	0.0498834	1.3	0.173853	1.37813	289.059	88.3	1.5	Down
M289T90	8.05829e+06	7.94142e+06	8.2382e+06	1.06036e+07	9.05934e+06	4.90547e+06	4.75205e+06	9.73098e+06	2.02362e+07	3.1102e+07	2.72358e+07	1.33085e+07	1.03762e+07	8.55016e+06	1.06043e+07	8.67952e+06	1.62616e+07	1.19564e+07	54.45	7.91117e+06	8.14825e+06	26.61	2.06	1.04	0.00699301	2.16	0.0487438	1.49639	289.139	90	1.5	Up
M290T266	86878.7	32856.3	41464.8	56862.9	77867.7	31907.2	50470.5	59955.9	108479	66292.4	159272	87999.5	71835.5	55304.6	65400	73631.5	86026.8	72733.5	39.26	54783	53666.7	36.47	1.57	0.65	0.0379176	1.42	0.147066	1.41505	290.035	266	4.4	Up
M290T373	18477.3	13425.5	29500.2	3434.34	5336.03	3499.33	163787	32114.1	23664.7	132297	38480.7	33159.9	23784	477881	486407	490423	213262	85388.9	106.76	33696.8	15951.4	159.49	6.33	2.66	0.014763	1.83	0.078691	1.43708	290.07	372.5	6.2	Up
M290T530	48842.8	45414.2	43284.6	124260	95296.5	74477.6	52662.5	61542.7	156569	209137	475693	126500	195363	97887.7	206132	65960.8	191655	175966	65.79	68222.6	57102.6	41.89	2.81	1.49	0.0018648	2.73	0.0213197	1.67558	290.142	530.4	8.8	Up
M291T111	460669	407644	443044	459369	636686	471327	426296	414875	342601	247399	340017	378600	357219	469401	290793	261431	335933	341309	21.22	464989	451207	15.71	0.72	-0.47	0.004662	2.33	0.0380456	1.66545	291.12	111.4	1.9	Down
M291T148	184590	34320.9	198803	221121	237207	200849	269343	150001	304640	406225	319592	312022	228400	268803	301338	235153	297021	302989	18.9	187029	199826	38.07	1.59	0.67	0.0029526	2.53	0.0288032	1.30483	291.065	148.1	2.5	Up
M291T324	702929	484071	508031	670275	357283	271274	328539	360226	764611	714568	811507	436075	582115	541230	492934	608778	618977	595447	21.53	460328	422148	34.79	1.34	0.43	0.0498834	1.3	0.173853	1.26151	291.065	324.5	5.4	Up
M291T446	138747	162765	72200.8	78490.7	27364	61687.6	101163	128518	3811.17	9964.28	2372.85	58807.8	11055.7	70173.3	1977.78	17134.3	21912.1	10510	122.95	96367	89827.1	46.62	0.23	-2.14	0.0010878	2.96	0.0151734	1.73687	291.138	446.4	7.4	Down
M291T533	125515	225861	145316	166021	86262.8	72430.6	85580.7	38493.9	162955	482147	244239	115704	196362	231206	229263	316564	247305	230234	45.23	118185	105889	50.77	2.09	1.07	0.00699301	2.16	0.0487438	1.48445	291.036	532.7	8.9	Up
M291T570	16401.6	63010.4	30688	99056.4	16899.9	26217.9	32466.6	61185.9	112635	309072	142201	38740.4	159793	160090	252077	154153	166095	156973	49.7	43240.8	31577.3	66.6	3.84	1.94	0.0010878	2.96	0.0151734	1.76096	291.136	569.6	9.5	Up
M291T659	171425	204442	211374	222843	78513.2	113329	218006	271947	367251	450237	302995	213043	413191	118107	264426	331964	307652	317479	35.26	186485	207908	33.79	1.65	0.72	0.0206682	1.68	0.0984557	1.29145	291.159	658.9	11	Up
M291T707	33215.8	21421.8	13846.2	43721.3	49656.6	9371.66	14757.1	54491.5	133957	128865	182037	83943.4	77343.4	110563	34923.5	65690.4	102165	97253.3	45.27	30060.2	27318.8	58.67	3.4	1.76	0.0010878	2.96	0.0151734	1.79808	291.069	706.8	11.8	Up
M291T91	907964	1.14987e+06	876644	2.31419e+06	875227	1.03399e+06	269366	1.71641e+06	208408	168713	178741	202442	185722	195309	611572	5.51144e+06	907793	198875	205.56	1.14296e+06	970978	54.07	0.79	-0.33	0.014763	1.83	0.078691	1.18567	291.09	91.4	1.5	Down
M292T145	64503.5	19054.7	91756	142907	132853	32932	79022.2	43981.1	134258	380683	170682	120069	134809	125598	142253	99031.8	163423	134533	55.13	75876.2	71762.9	59.4	2.15	1.11	0.014763	1.83	0.078691	1.52587	292.07	145.4	2.4	Up
M292T284	2.21521e+06	2.75752e+06	1.87463e+06	3.07733e+06	1.99457e+06	2.46076e+06	1.81426e+06	2.47449e+06	2.307e+06	8.23331e+06	2.9012e+06	1.85744e+06	3.23281e+06	5.854e+06	6.11005e+06	6.1946e+06	4.5863e+06	4.5434e+06	50.22	2.3336e+06	2.33799e+06	19.01	1.97	0.97	0.0379176	1.42	0.147066	1.35142	291.941	284.5	4.7	Up
M292T303_2	180096	95058.7	92561.3	172768	82718.2	74635.8	73861.4	89108.6	78250.6	227515	184216	399216	398011	140271	189763	225316	230320	207540	49.69	107601	90835	40.16	2.14	1.1	0.0104118	1.98	0.0628046	1.50787	292.131	303.3	5.1	Up
M292T325	258465	215640	290285	217164	234657	203893	286062	200093	139517	143165	168311	233288	164699	189822	121407	176274	167060	166505	20.75	238282	225911	15.05	0.7	-0.51	0.0018648	2.73	0.0213197	1.67859	292.119	325.4	5.4	Down
M292T373_1	27408.9	13465.3	50685	154494	122692	147663	58718.3	109194	215870	365744	294421	310940	234372	257401	187042	342827	276077	275911	22.78	85540.1	83956.4	64.13	3.23	1.69	0.0001554	3.81	0.00449411	1.77019	292.049	372.9	6.2	Up
M292T373_2	157078	97857.1	61302.8	130789	51851.5	33414.5	148951	175639	244677	294632	251072	206791	252199	206358	212243	230153	237266	237415	12.66	107110	114323	50.12	2.22	1.15	0.0001554	3.81	0.00449411	1.80636	292.085	373.5	6.2	Up
M293T108	359642	115983	377913	108733	328539	286123	599307	323336	164091	23849.7	42561.6	284193	189336	312101	295266	50335.5	170217	176714	70.66	312447	325937	49.87	0.54	-0.88	0.0379176	1.42	0.147066	1.08924	293.088	108	1.8	Down
M293T326	2.5498e+06	1.82836e+07	1.60938e+06	1.82343e+06	955180	846883	1.69975e+06	1.4703e+06	659790	831638	1.92937e+06	2.36183e+06	585436	674481	531590	756853	1.04137e+06	715667	66.97	3.65479e+06	1.65456e+06	162.38	0.28	-1.81	0.0379176	1.42	0.147066	1.13386	293.088	326.1	5.4	Down
M293T334	29530.6	24907.8	25718.4	97791.5	72330.7	22416.5	16757.8	95381.6	236792	138638	205031	135933	263126	251447	223251	179983	204275	214141	23.89	48104.4	27624.5	71.66	4.25	2.09	0.0001554	3.81	0.00449411	2.00082	293.088	333.7	5.6	Up
M293T581	244261	505929	366860	326841	149706	271635	115533	396846	125843	84558	114476	114380	45330.1	113482	105595	84870.4	98566.8	109539	26.39	297201	299238	43.58	0.33	-1.59	0.0003108	3.51	0.00655521	1.86964	293.161	581.1	9.7	Down
M293T612	85320.2	178518	50690.7	53850.5	38827.6	53038.8	54591.8	52536.5	13781.1	8847.49	6088.98	42584.5	10872.6	27163.2	3596.14	7428.45	15045.3	9860.03	88.18	70921.8	53444.7	64.04	0.21	-2.24	0.0003108	3.51	0.00655521	1.93442	292.988	612	10.2	Down
M293T649	62196.7	72718.4	57781.9	64570.4	67940.6	29785.1	42721.2	34054.3	76413.7	225219	148453	71390.8	79121.8	63650.9	61692.2	82160.8	101013	77767.8	56.67	53971.1	59989.3	30.12	1.87	0.9	0.0104118	1.98	0.0628046	1.42968	292.909	649.2	10.8	Up
M293T785	1.02184e+07	1.28399e+06	8.23964e+06	83912	8.22966e+06	3.54342e+06	5.66883e+06	4.5149e+06	2.42891e+06	492722	441309	168050	397042	2.38023e+06	59868.8	102255	808799	419176	123.37	5.22285e+06	5.09187e+06	68.1	0.15	-2.69	0.014763	1.83	0.078691	1.39098	293.212	785.1	13.1	Down
M293T79_2	9.74802e+07	1.07776e+08	9.74206e+07	9.91893e+07	7.49078e+07	2.27781e+08	8.07431e+07	8.19104e+07	1.26382e+08	2.04465e+08	1.63796e+08	1.04012e+08	1.53171e+08	1.03706e+08	2.61025e+08	1.37615e+08	1.56771e+08	1.45393e+08	34.18	1.08401e+08	9.74504e+07	45.68	1.45	0.53	0.014763	1.83	0.078691	1.1505	292.932	78.7	1.3	Up
M293T804	1.2898e+07	5.79374e+06	1.05121e+07	7.86527e+06	7.87637e+06	2.44321e+07	2.57507e+07	3.04758e+06	8.30966e+07	8.18339e+07	7.94775e+07	6.58918e+07	5.99976e+07	7.57858e+07	9.81721e+07	4.84604e+07	7.40895e+07	7.76317e+07	20.88	1.2272e+07	9.19423e+06	68.79	6.04	2.59	0.0001554	3.81	0.00449411	2.06005	293.178	803.9	13.4	Up
M294T302	12630.4	61887.8	105407	7956.07	6547.67	128362	4897.8	16983.6	729763	1.31264e+06	1.31734e+06	84966.6	400941	548121	1.40853e+06	921177	840435	825470	57.61	43084.1	14807	114.87	19.51	4.29	0.000621601	3.21	0.0104451	1.9366	294.101	302.2	5	Up
M294T326	85317.7	267250	45259.1	49447.4	31011.4	29500.9	128510	35601.7	449869	39876	107888	499997	298271	437074	306339	283164	302810	302305	53.84	83987.3	47353.2	96.92	3.61	1.85	0.00699301	2.16	0.0487438	1.51128	294.092	326.1	5.4	Up
M294T333	47420.2	19307.5	50211.9	16146.8	50464.3	35814.6	51154.4	38518.2	14579.7	5615.5	4096.07	14480.7	29288.4	34187.9	3973.88	20759.9	15872.8	14530.2	72.55	38629.8	42969.2	36.55	0.41	-1.28	0.004662	2.33	0.0380456	1.51696	294.095	333.4	5.6	Down
M294T530	1333.77	55359.1	8503.92	7557.96	1033.94	77260.4	3363.31	168521	48768	98430.1	335478	51723.3	197106	207552	468461	303657	213897	202329	69.54	40366.7	8030.94	146.68	5.3	2.41	0.00699301	2.16	0.0487438	1.58017	294.134	529.8	8.8	Up
M294T548	1370.01	1442.78	6064.15	3868.91	7136.59	3434.46	10733.7	53704.6	18363.9	39917.7	141275	26604	41653.3	76437.9	105378	52244.2	62734.2	46948.8	67.42	10969.4	4966.53	159.96	5.72	2.52	0.0029526	2.53	0.0288032	1.86984	294.14	547.8	9.1	Up
M294T579	57594.8	71348.3	71339.7	76699.1	69608.4	83384.4	62830.5	86097.5	47675.3	55719.5	60902.9	69932.4	62082	43043.2	41465.4	43358	53022.3	51697.4	20.07	72362.8	71344	13.29	0.73	-0.45	0.0029526	2.53	0.0288032	1.65966	294.138	579.5	9.7	Down
M295T408	94942.7	163688	149192	181949	183311	109152	300395	147805	145603	32414.9	48901.1	174443	148307	55459.1	43744.9	59808.8	88585.2	57633.9	64.5	166304	156440	37.7	0.53	-0.91	0.0206682	1.68	0.0984557	1.41398	294.884	408.2	6.8	Down
M295T530	191520	121365	161430	95747.3	72515	81663.5	85741.7	121080	63531.6	3130.32	67805.7	163593	71766.8	58436.2	4363.98	49420.3	60256.1	60983.9	82.71	116383	108414	35.89	0.52	-0.95	0.00699301	2.16	0.0487438	1.17428	295.139	529.6	8.8	Down
M295T586	178139	437608	286227	542817	296624	314508	313467	407881	267348	192943	161020	290172	248544	219169	204409	223197	225850	221183	18.46	347159	313988	32.15	0.65	-0.62	0.0104118	1.98	0.0628046	1.46908	295.028	586.1	9.8	Down
M295T597	1.03653e+06	5.65844e+06	4.82574e+06	5.95832e+06	1.71929e+06	5.6853e+06	3.00312e+06	1.16129e+06	1.73015e+07	8.78773e+06	2.32904e+07	2.32438e+07	1.49607e+07	1.22211e+07	1.40999e+07	1.45956e+07	1.60626e+07	1.47782e+07	31.59	3.631e+06	3.91443e+06	58.93	4.42	2.15	0.0001554	3.81	0.00449411	1.91649	294.982	596.7	9.9	Up
M295T63	80875	58116	79478.6	55169.9	53023.7	85485.2	83652.4	76751.7	29658.4	16190.8	45527.1	70478.4	38054.2	79680.7	57900.9	43877	47670.9	44702.1	43.98	71569.1	78115.2	19.11	0.67	-0.59	0.0206682	1.68	0.0984557	1.28902	294.53	63.4	1.1	Down
M295T741	752004	3.97902e+06	3.88976e+06	475448	649251	473652	496601	3.27934e+06	7.73724e+06	3.90681e+06	6.70601e+06	8.5932e+06	854059	3.32314e+06	6.13559e+06	4.78072e+06	5.2546e+06	5.45816e+06	48.43	1.74939e+06	700628	93.97	3	1.59	0.004662	2.33	0.0380456	1.50032	295.264	741.5	12.4	Up
M295T767	734666	240168	274112	408957	848828	811117	371220	525512	2.42127e+06	1.02843e+07	1.18186e+06	571377	804576	1.39459e+06	735047	790986	2.27299e+06	993220	144.75	526822	467235	46.04	4.31	2.11	0.014763	1.83	0.078691	1.34722	295.264	766.5	12.8	Up
M296T302	56287.3	61905.7	93633.1	78211.9	94639.1	96729	63086.1	65482.7	118466	295762	210917	60454.4	165169	65265.4	127118	119586	145342	123352	53.71	76246.9	71847.3	21.93	1.91	0.93	0.0379176	1.42	0.147066	1.3473	296.055	301.6	5	Up
M296T378	16302.5	9730.54	23107	10176.8	20050.8	9117.37	11900	8176.39	95611.3	68817.7	47908.5	38342.9	21028.1	47565.1	183192	45889.2	68544.4	47736.8	74.85	13570.2	11038.4	41.16	5.05	2.34	0.0003108	3.51	0.00655521	1.94674	296.09	378.3	6.3	Up
M296T481	188331	179462	205425	117713	153223	194981	164232	159638	87459.7	43820.1	107543	96013.3	179162	128777	47568.4	135095	103180	101778	43.93	170376	171847	16.39	0.61	-0.72	0.004662	2.33	0.0380456	1.49819	296.06	481	8	Down
M296T597	117145	218042	722499	226282	193331	184952	900814	129843	1.89125e+06	844676	2.91047e+06	866895	633202	1.82609e+06	584605	1.30559e+06	1.35785e+06	1.08624e+06	59.34	336613	205687	88.98	4.03	2.01	0.004662	2.33	0.0380456	1.83227	295.985	596.7	9.9	Up
M296T81	9.55942e+06	9.14333e+06	1.10614e+07	7.51229e+06	1.23083e+07	1.15593e+07	1.07133e+07	9.12243e+06	1.17701e+07	1.05349e+07	1.38065e+07	1.42849e+07	1.14601e+07	1.1804e+07	1.29392e+07	1.10763e+07	1.22095e+07	1.17871e+07	10.9	1.01225e+07	1.01363e+07	15.47	1.21	0.27	0.0206682	1.68	0.0984557	1.40496	296.007	81.2	1.4	Up
M296T836	9.29185e+07	6.23674e+07	8.56665e+07	5.78238e+07	2.65739e+07	5.07005e+07	8.03754e+07	8.03067e+07	1.14316e+08	1.88829e+08	2.40418e+08	2.22218e+08	4.2407e+08	1.25323e+08	1.08286e+08	1.7622e+08	1.9996e+08	1.82525e+08	51.54	6.70916e+07	7.13371e+07	32.76	2.98	1.58	0.0001554	3.81	0.00449411	1.87789	296.231	835.6	13.9	Up
M296T90	297785	195079	305876	484135	335941	244671	372100	513919	688298	437024	647257	343354	620845	395364	514958	563381	526310	539170	23.81	343688	320908	32.06	1.53	0.61	0.00699301	2.16	0.0487438	1.56124	296.086	89.6	1.5	Up
M297T329_2	311005	511134	257643	431855	307868	231741	243332	205706	196236	216021	259037	231963	194982	119782	186920	219046	202998	206129	20.14	312536	282756	34.09	0.65	-0.62	0.0104118	1.98	0.0628046	1.4253	297.103	329	5.5	Down
M297T548	1646.12	7395.66	12133.3	13360.3	5133.8	4864.28	4025.55	74470.8	33802.2	55822.4	60518	32167.3	147680	213414	111573	44280.9	87407.2	58170.2	74.4	15378.7	6264.73	157.43	5.68	2.51	0.0029526	2.53	0.0288032	1.81601	297.134	548.5	9.1	Up
M297T742	357675	958005	593661	6.20276e+06	6.72042e+06	2.989e+06	989489	1.61608e+06	1.67712e+07	1.13759e+08	6.7051e+07	1.45187e+06	1.15635e+07	2.19697e+06	3.70654e+07	2.55119e+07	3.44214e+07	2.11416e+07	112.01	2.55339e+06	1.30278e+06	99.74	13.48	3.75	0.00699301	2.16	0.0487438	1.59314	297.046	742.2	12.4	Up
M297T754	941340	261788	394455	504832	371358	270904	981573	451480	1.43124e+06	1.75612e+06	4.18677e+06	560673	533600	310411	1.90762e+06	2.28518e+06	1.62145e+06	1.59368e+06	77.96	522216	422967	54.26	3.1	1.63	0.0206682	1.68	0.0984557	1.44107	297.153	754.3	12.6	Up
M297T83	4.56027e+06	5.27844e+06	4.81136e+06	5.45856e+06	5.07934e+06	4.45917e+06	5.43008e+06	5.87914e+06	3.54234e+06	3.69309e+06	3.98847e+06	3.91338e+06	4.13672e+06	3.35825e+06	4.00364e+06	3.36658e+06	3.75031e+06	3.80323e+06	8.09	5.11954e+06	5.17889e+06	9.51	0.73	-0.45	0.0001554	3.81	0.00449411	2.00326	296.888	83.5	1.4	Down
M297T833	2.82976e+07	2.96971e+07	3.46641e+07	3.74842e+07	2.1846e+07	1.65263e+07	1.23046e+07	2.52676e+07	6.04869e+06	1.33607e+07	1.55991e+07	6.82817e+06	2.04241e+07	7.86128e+06	1.52735e+07	2.77388e+07	1.41418e+07	1.43171e+07	52.56	2.57609e+07	2.67826e+07	33.48	0.55	-0.87	0.014763	1.83	0.078691	1.35621	297.046	833	13.9	Down
M298T161	682830	359749	728205	1.12067e+06	668487	389254	139878	433724	1592.58	291.729	1914.2	522.744	18444.4	28471	598.429	294.324	6516.17	1095.5	165.91	565350	551106	53.11	0.01	-6.44	0.0001554	3.81	0.00449411	2.13313	297.861	161.3	2.7	Down
M298T319	361.503	1427.07	732.65	405.416	15875.8	742.224	1337.96	309.001	337.738	69493.8	2604.43	12622.1	25226.3	142868	98184.3	101963	56662.5	47360.1	95.26	2648.96	737.44	202.4	21.39	4.42	0.014763	1.83	0.078691	1.55469	298.105	319	5.3	Up
M298T414	319972	299283	293616	587912	337049	126044	530213	336536	41373.3	15132.6	85559.9	93646	88192.7	72499.2	121198	27687.5	68161.1	79029.5	53.63	353828	328254	40.83	0.19	-2.38	0.0001554	3.81	0.00449411	1.89712	298.038	414.2	6.9	Down
M298T433	28483.4	45423.7	14963.9	69303.7	75420.7	16295	22308.1	25330.9	136643	197197	194727	29883.2	114028	54123.1	126125	140689	124177	131384	47.78	37191.2	26907.2	63.7	3.34	1.74	0.0029526	2.53	0.0288032	1.68868	298.077	433.1	7.2	Up
M298T539	290290	241672	341299	367682	172031	8236.97	267938	276006	9501.47	54833.4	9874	7349.79	7470.06	6043.76	6350.59	148328	31218.9	8485.77	160.55	245644	271972	45.97	0.13	-2.98	0.0018648	2.73	0.0213197	1.64478	298.165	539.4	9	Down
M298T598	49481.7	8858.23	52029.5	128082	105648	32361.8	59742.4	59299.5	230460	378628	284400	50112.2	149822	87074.5	217957	240033	204811	224209	52.01	61937.8	55664.5	61.76	3.31	1.73	0.00699301	2.16	0.0487438	1.62614	298.213	597.5	10	Up
M298T689	54441.9	50785.7	32911.9	50972.4	74625.1	48682.1	67702.1	30500	94063.5	106181	113332	89240.4	109538	79831.6	64424.5	74339.9	91368.8	91651.9	19.37	51327.6	50879.1	29.46	1.78	0.83	0.0010878	2.96	0.0151734	1.78974	298.148	689.1	11.5	Up
M298T713	1.28752e+06	931826	1.00104e+06	1.53156e+06	762788	1.69713e+06	381701	696776	1.95196e+06	1.10364e+06	1.77975e+06	1.74348e+06	1.71781e+06	1.89579e+06	1.70918e+06	808372	1.58875e+06	1.73065e+06	25.65	1.03629e+06	966434	42.78	1.53	0.62	0.0104118	1.98	0.0628046	1.17097	298.183	713.4	11.9	Up
M298T735	901933	999347	914837	1.0362e+06	531559	880497	674362	988041	1.41005e+06	1.98139e+06	1.32328e+06	1.30198e+06	909909	1.97688e+06	2.41726e+06	1.2811e+06	1.57523e+06	1.36667e+06	31.56	865847	908385	20.2	1.82	0.86	0.0018648	2.73	0.0213197	1.69965	297.984	735.2	12.3	Up
M298T742	47684.1	129311	80509.5	644043	797561	862060	131296	216174	6.34834e+06	4.38194e+06	2.34563e+07	194693	2.42497e+06	271080	1.03601e+07	8.94489e+06	7.04779e+06	5.36514e+06	108.01	363580	173735	94.48	19.38	4.28	0.00699301	2.16	0.0487438	1.62201	298.046	742.2	12.4	Up
M299T102	188028	242292	238258	230148	180239	116498	234937	215407	465829	742687	448303	317848	386235	478308	499985	574471	489208	472068	26.08	205726	222777	20.84	2.38	1.25	0.0001554	3.81	0.00449411	2.07059	299.172	101.7	1.7	Up
M299T38	85368.4	47300.2	87135.3	70778	50577.2	36714.9	74634.6	74406.4	36843.3	17767	22823.5	81241.5	27134	57460.9	19148.3	32775.6	36899.3	29954.8	59.56	65864.4	72592.2	28.32	0.56	-0.84	0.0206682	1.68	0.0984557	1.44135	298.836	38.2	0.6	Down
M299T472	141538	45200	83794.5	39560.5	162169	97844.2	112907	87959.8	67326.6	58117	56110.9	18639.3	41634.7	50196.1	51954.6	44946.7	48615.7	51075.3	29.82	96371.7	92902	44.23	0.5	-0.99	0.0379176	1.42	0.147066	1.37331	299.097	471.8	7.9	Down
M299T501	350428	187441	137652	178872	205175	286739	324660	247784	156041	36774	33992.3	129870	125094	175896	16335.7	183571	107197	127482	63.41	239844	226480	31.44	0.45	-1.16	0.0018648	2.73	0.0213197	1.49342	299.097	501.2	8.4	Down
M299T534	63062.3	73059.5	67863.1	49093.5	13717.6	38110.1	51011.9	46145.5	162283	340261	308036	143251	190075	192806	137344	179912	206746	184993	36.61	50257.9	50052.7	37.57	4.11	2.04	0.0001554	3.81	0.00449411	2.02528	299.149	533.9	8.9	Up
M299T54	630104	977889	799781	829993	546374	583379	783326	907126	964680	899813	1.32642e+06	997784	1.09183e+06	781746	999097	790583	981494	981232	17.86	757247	791554	20.57	1.3	0.37	0.0379176	1.42	0.147066	1.428	298.916	54.3	0.9	Up
M299T593	120218	133695	167502	220494	144763	103075	215839	187267	132913	77630.3	173611	118190	134953	74871.8	84034.2	110374	113322	114282	30.07	161607	156133	26.98	0.7	-0.51	0.0379176	1.42	0.147066	1.18164	299.151	592.8	9.9	Down
M299T616	45270.3	34543.2	53449.4	32446	53360.8	40249.4	66077.2	32932	241518	134467	320868	328356	285031	257667	227205	293134	261031	271349	23.91	44791	42759.8	26.96	5.83	2.54	0.0001554	3.81	0.00449411	2.24592	299.026	616.5	10.3	Up
M299T833	1.04822e+06	1.03784e+06	2.4878e+06	5.41275e+06	1.14989e+06	2.35517e+06	531375	3.57701e+06	830360	217223	145333	294634	282079	178543	991105	789878	466144	288357	73.6	2.20001e+06	1.75253e+06	74.67	0.21	-2.24	0.0010878	2.96	0.0151734	1.7116	299.043	833.3	13.9	Down
M299T84	2.54692e+06	1.92649e+06	1.99821e+06	2.05205e+06	2.37518e+06	1.4865e+06	1.78682e+06	1.73656e+06	1.89024e+06	239301	1.66723e+06	1.56797e+06	1.24841e+06	1.41863e+06	373641	1.24376e+06	1.20615e+06	1.33352e+06	49.43	1.98859e+06	1.96235e+06	17.27	0.61	-0.72	0.0029526	2.53	0.0288032	1.24066	298.931	84	1.4	Down
M299T92	4.86318e+06	3.02897e+06	6.42737e+06	3.68185e+06	3.72517e+06	4.24036e+06	8.35028e+06	4.45661e+06	3.12758e+06	832965	3.36416e+06	9.36513e+06	3.17833e+06	1.86496e+06	1.29972e+06	1.19796e+06	3.02885e+06	2.49627e+06	90.69	4.84672e+06	4.34848e+06	35.92	0.62	-0.68	0.0281274	1.55	0.119973	1.19995	299.101	91.9	1.5	Down
M299T95	3.37583e+06	9.14361e+06	1.19208e+07	1.17015e+07	1.23865e+07	2.18453e+07	1.12009e+07	9.55362e+06	2.08585e+07	1.87795e+07	2.20259e+07	1.17424e+07	1.39987e+07	2.06005e+07	1.01584e+07	2.86539e+07	1.83522e+07	1.969e+07	33.27	1.1391e+07	1.14512e+07	44.93	1.61	0.69	0.0379176	1.42	0.147066	1.196	299.087	94.6	1.6	Up
M300T102	5536.64	46805.3	23502.3	36392.4	43652.5	22974.1	25218.9	20324.2	51190.3	93655.8	51444.5	39907.6	37037.1	197582	211110	135360	102161	72550.2	69.65	28050.8	24360.6	48.32	3.64	1.86	0.0018648	2.73	0.0213197	1.56134	300.102	101.6	1.7	Up
M300T286	69104.1	349858	38509.7	78100.8	65140.7	71108.1	75402.5	88109.7	193746	569447	500173	139147	560054	402481	979394	843230	523459	530113	55.23	104417	73255.3	95.96	5.01	2.33	0.000621601	3.21	0.0104451	1.85287	299.935	285.8	4.8	Up
M300T302	433812	130929	493778	128088	152672	208876	592748	575572	861193	737453	1.22408e+06	768435	777768	1.12625e+06	819453	936442	906384	840323	19.73	339559	321344	60.22	2.67	1.42	0.0001554	3.81	0.00449411	1.87017	299.972	302.2	5	Up
M300T510	27355.2	54164.5	47681.9	77090.4	33676.6	57864.1	44221.3	44323.2	48713	178161	205294	24998.8	72129.8	199812	266918	263087	157389	188986	60.9	48297.2	46002.6	31.69	3.26	1.7	0.0379176	1.42	0.147066	1.42171	300.09	509.9	8.5	Up
M300T652	47164.4	26319.1	54918.2	48807.2	24544.8	73426.3	56647	50983.9	159497	69399.5	122738	218524	144732	34409.7	52242.1	62401.1	107993	96068.5	59.11	47851.4	49895.6	33.51	2.26	1.17	0.0281274	1.55	0.119973	1.36688	300.1	651.8	10.9	Up
M300T769	3.84707e+06	1.268e+06	3.85926e+06	4.10569e+06	2.14173e+06	1.02441e+06	2.59596e+06	5.70581e+06	6.2502e+06	4.97051e+06	5.48382e+06	4.22881e+06	4.3273e+06	4.50534e+06	2.69273e+06	7.85197e+06	5.03884e+06	4.73792e+06	30.5	3.06849e+06	3.22151e+06	51.92	1.64	0.72	0.014763	1.83	0.078691	1.38976	300.254	768.5	12.8	Up
M300T97	1.00042e+06	933496	887870	1.06733e+06	820490	786033	1.34094e+06	890836	2.98837e+06	3.18776e+06	3.32486e+06	1.9429e+06	956730	1.02164e+06	1.59361e+06	2.33559e+06	2.16893e+06	2.13924e+06	43.54	965927	912166	18.29	2.25	1.17	0.0029526	2.53	0.0288032	1.72576	300.039	97	1.6	Up
M301T329	3314.67	468.771	14061.1	14618.9	2441.14	1028.51	774.961	2758.48	35966.1	46142.3	32486	22714.1	41075.2	41454.4	37930.9	46239.8	38001.1	39503.1	20.48	4933.31	2599.81	119.47	7.7	2.95	0.0001554	3.81	0.00449411	2.00051	301.084	329.4	5.5	Up
M301T502	11107.5	9670.37	8069.28	16651.6	10183.8	12528.7	31103.1	10057.1	33693.8	32902.6	42986.5	44250.2	47463.6	45618.8	36591	43196.4	40837.9	43091.4	13.75	13671.4	10645.6	54.82	2.99	1.58	0.0001554	3.81	0.00449411	2.08515	301.122	501.9	8.4	Up
M301T532	299730	129324	52803	145432	252957	136376	233262	139219	576598	92297.4	509585	484792	505647	191651	298434	322812	372727	403802	46.47	173638	142326	46.52	2.15	1.1	0.0281274	1.55	0.119973	1.32734	301.165	531.9	8.9	Up
M301T638	314923	317036	388702	298005	490618	224452	288526	309236	230418	276273	314889	237992	214176	231516	232680	261660	249950	235336	13.09	328937	312080	24.09	0.76	-0.4	0.0206682	1.68	0.0984557	1.31126	301.12	637.8	10.6	Down
M301T99	465148	426004	655008	355497	364080	264394	633323	469327	431704	1.13101e+06	444004	530142	473768	1.5292e+06	1.31783e+06	1.06928e+06	865866	799709	51.44	454098	445576	29.71	1.91	0.93	0.0379176	1.42	0.147066	1.33577	301.042	98.9	1.6	Up
M302T100	2.8268e+06	2.88633e+06	2.17155e+06	3.3854e+06	3.40576e+06	1.28394e+06	2.03266e+06	1.01042e+06	1.6495e+06	40062.5	2.0665e+06	3.89388e+06	760208	506027	568520	454162	1242358	664364	101.68	2.37536e+06	2.49918e+06	38.19	0.52	-0.94	0.0498834	1.3	0.173853	1.15796	302.019	99.9	1.7	Down
M302T212	111942	81421.4	18043.2	132745	262137	95266	199894	98526.1	191117	231398	237429	268040	306532	202364	256608	205170	237332	234413	16.34	124997	105234	60.15	1.9	0.93	0.00699301	2.16	0.0487438	1.42667	302.099	211.9	3.5	Up
M302T286_1	212465	235066	175613	209767	129208	193817	155057	189990	224682	338144	228984	175149	239323	375132	417155	438260	304604	288734	32.77	187623	191903	18.04	1.62	0.7	0.0104118	1.98	0.0628046	1.49703	301.932	286.1	4.8	Up
M302T286_2	95959	645487	146401	135513	81718.6	75602.6	142265	100242	1.14515e+06	748565	147934	852064	204120	291177	562516	819882	596426	655541	59.75	177899	117878	107.32	3.35	1.75	0.0018648	2.73	0.0213197	1.5594	301.97	285.8	4.8	Up
M302T363	114772	63186.9	298738	86999.6	88680.5	25476.3	240531	91920.3	309373	476590	258775	260496	387259	454762	692588	664938	438098	421010	38.66	126288	90300.4	74.04	3.47	1.79	0.000621601	3.21	0.0104451	1.88651	302.106	362.9	6	Up
M302T68	168825	156097	177319	404490	356384	263919	217083	340298	977866	913325	954395	1.16172e+06	538480	1.0225e+06	460973	1.12782e+06	894634	966131	28.9	260552	240501	36.82	3.43	1.78	0.0001554	3.81	0.00449411	2.04235	301.513	67.6	1.1	Up
M302T97	36607.3	52952	38765.2	38995.1	37794.2	32245.3	20154.3	28756.6	986180	1.20187e+06	1.90089e+06	575428	700434	782174	809401	725137	960190	795787	44.35	35783.8	37200.8	26.4	26.83	4.75	0.0001554	3.81	0.00449411	2.27712	302.037	97.1	1.6	Up
M303T112	65733.6	56523.6	78517	93884.3	69272.1	73134.4	71370.1	95073.2	139987	349419	131408	104699	135781	316348	257539	269976	213145	198763	44.93	75438.5	72252.2	17.69	2.83	1.5	0.0001554	3.81	0.00449411	1.89998	303.119	111.8	1.9	Up
M303T301	550867	643757	434499	580644	521293	435081	567624	421383	586208	643230	930268	868920	596005	668659	612178	541050	680815	627704	20.74	519393	536080	15.69	1.31	0.39	0.0104118	1.98	0.0628046	1.46856	303.083	301	5	Up
M303T409	415189	231641	441059	266097	218995	193342	369701	528631	259073	151033	215979	500120	191677	209663	93741.1	113807	216887	200670	58.53	333082	317899	36.82	0.65	-0.62	0.0379176	1.42	0.147066	1.11739	303.065	408.6	6.8	Down
M303T424	38188.6	116780	42246.3	105876	64918.7	40053.5	44330.2	44106	30937.9	30418.2	47797.9	36768.2	23994.5	19031	34797.2	47992.1	33967.1	32867.6	30.29	62062.5	44218.1	50.97	0.55	-0.87	0.0206682	1.68	0.0984557	1.38002	303.138	424.5	7.1	Down
M303T720	273494	347290	242929	126676	238971	312243	241049	115273	53367.5	32198.2	170321	166948	43638	104993	91993.2	100211	95458.7	96102	55.01	237241	241989	34.24	0.4	-1.31	0.0018648	2.73	0.0213197	1.66824	302.97	720.3	12	Down
M303T770	1.14075e+06	4.0243e+06	2.88811e+06	4.86168e+06	1.67379e+06	3.99191e+06	2.92136e+06	3.75105e+06	5.80913e+06	5.32803e+06	7.48349e+06	9.27376e+06	7.94764e+06	5.95776e+06	6.47704e+06	4.81666e+06	6.63669e+06	6.2174e+06	22.48	3.15662e+06	3.33621e+06	39.89	2.1	1.07	0.0003108	3.51	0.00655521	1.71119	303.226	770	12.8	Up
M303T791_1	762347	267504	432162	1.42151e+06	1.35995e+06	388410	705160	1.17802e+06	943433	8.90751e+06	5.86355e+06	1.67353e+06	529024	1.20537e+06	3.11675e+06	1.61045e+06	2.9812e+06	1.64199e+06	98.5	814383	733753	55.69	3.66	1.87	0.0206682	1.68	0.0984557	1.40596	303.173	791	13.2	Up
M303T806	4.78907e+06	1.30178e+07	2.74854e+06	5.12021e+06	5.08221e+06	2.35207e+06	5.10233e+06	7.88236e+06	1.70324e+07	4.32805e+07	2.63092e+07	2.70567e+07	2.26017e+07	1.26948e+07	3.36623e+07	3.94534e+07	2.77614e+07	2.6683e+07	38.11	5.76182e+06	5.09227e+06	58.71	4.82	2.27	0.0003108	3.51	0.00655521	2.04411	303.24	805.7	13.4	Up
M303T838_2	3.53702e+07	2.57762e+07	5.44885e+07	4.16641e+07	1.30753e+07	1.97984e+07	3.30566e+07	2.8549e+07	4.06193e+07	5.56603e+07	5.92987e+07	3.0781e+07	8.9647e+07	3.72154e+07	9.31019e+07	3.213e+07	5.48067e+07	4.81398e+07	45.24	3.14723e+07	3.08028e+07	41.03	1.74	0.8	0.0379176	1.42	0.147066	1.35152	303.239	837.9	14	Up
M304T122	933643	919319	785531	1.19149e+06	1.05692e+06	892557	1.14491e+06	1.33787e+06	559786	852783	765494	498732	876299	1.03054e+06	878701	1.01573e+06	809757	864541	23.95	1.03278e+06	995281	17.74	0.78	-0.35	0.0281274	1.55	0.119973	1.18314	304.048	121.7	2	Down
M304T250	1.57061e+06	469317	1.11584e+06	274134	1.47766e+06	293996	324798	258997	1.62543e+06	1.40752e+06	2.3487e+06	1.145e+06	838442	1.18312e+06	387581	2.46779e+06	1.42545e+06	1.29532e+06	49.88	723170	397058	78.68	1.97	0.98	0.0498834	1.3	0.173853	1.2766	304.054	250.4	4.2	Up
M304T303	1934.32	2146.63	1557.98	1826.68	18461.8	1855.15	2274.52	1566.55	375.39	20872.3	13301.3	2589.33	16603.2	51716.1	51882.8	28276.3	23202.1	18737.8	85.49	3952.95	1894.73	148.44	5.87	2.55	0.0281274	1.55	0.119973	1.23607	303.932	302.9	5	Up
M304T374	240565	344195	280270	243376	403735	172341	386536	323191	533290	505367	527356	611446	362232	413836	418829	208140	447562	462098	28.07	299276	301730	26.54	1.5	0.58	0.014763	1.83	0.078691	1.32885	304.049	373.9	6.2	Up
M304T417	554073	452384	540333	1.07163e+06	479717	555708	952928	818297	50511.6	39518.3	112003	106612	134630	91896.9	244481	37959.4	102202	99254.6	66.41	678134	554890	34.79	0.15	-2.73	0.0001554	3.81	0.00449411	2.06859	304.133	417.4	7	Down
M304T449	68073.9	45718.9	39980.9	32622.3	28161.9	35025.5	39289.3	33752.3	3161.73	410.601	467.748	51515.2	14130.4	35568.8	1011.08	3860.52	13765.8	3511.13	140.78	40328.1	37157.4	30.78	0.34	-1.55	0.0281274	1.55	0.119973	1.59922	304.049	449.2	7.5	Down
M304T551	79660.3	120053	35939.7	245689	59149.2	29845.5	79962.7	78360.2	27765.9	2089.68	82167	40989.5	42772.9	1090.35	7462.07	10530.6	26858.5	19148.2	103.73	91082.4	79010.3	75.35	0.29	-1.76	0.0206682	1.68	0.0984557	1.38157	304.122	550.8	9.2	Down
M304T610	2937.27	12665	2533.02	8044.22	10492.5	25154.1	1480.52	3528.84	3306.1	67928.5	61835.2	12789.2	4902.21	179591	312891	149455	99087.2	64881.8	109.62	8354.43	5786.53	94.82	11.86	3.57	0.0206682	1.68	0.0984557	1.35357	304.06	610.2	10.2	Up
M304T702	284837	85406.7	227716	201714	225513	261378	218539	198636	167011	96147.4	176800	96636	202052	93414.3	77736.5	209191	139874	131824	38.76	212967	222026	27.79	0.66	-0.61	0.0281274	1.55	0.119973	1.14916	304.159	702.2	11.7	Down
M304T803	1.11207e+07	752606	2.87657e+06	4.05088e+06	2.20299e+06	2.92745e+06	4.28458e+06	3.67785e+06	1.64682e+07	7.60848e+06	2.25726e+07	1.49859e+07	2.31968e+07	1.21867e+07	4.88548e+06	1.04918e+07	1.40495e+07	1.35863e+07	46.95	3.98671e+06	3.30265e+06	77.65	3.52	1.82	0.0010878	2.96	0.0151734	1.7877	304.236	803.1	13.4	Up
M304T839	5.6969e+06	6.28653e+06	1.10692e+07	1.3926e+07	3.01172e+06	2.51353e+06	5.95864e+06	7.62248e+06	2.95557e+07	8.90892e+06	6.09555e+06	7.86936e+06	2.4044e+07	2.57618e+07	3.92644e+07	1.01638e+07	1.89579e+07	1.71039e+07	65.02	7.01062e+06	6.12258e+06	55.04	2.7	1.44	0.0206682	1.68	0.0984557	1.42059	304.236	839	14	Up
M304T85	1.01261e+07	5.69437e+06	1.16945e+07	7.5867e+06	1.65265e+07	8.46299e+06	1.90474e+07	1.50982e+07	2.05704e+07	1.96038e+07	1.93338e+07	1.90214e+07	1.71888e+07	1.33673e+07	1.35153e+07	1.61556e+07	1.73446e+07	1.81051e+07	16.04	1.17796e+07	1.09103e+07	39.91	1.47	0.56	0.0206682	1.68	0.0984557	1.47924	304.007	85.1	1.4	Up
M305T153	2.26654e+06	2.79708e+06	2.7621e+06	9.77138e+06	2.32666e+06	539254	2.77746e+06	6.65155e+06	9.78931e+06	7.30778e+06	1.01124e+07	3.62261e+06	1.26965e+07	7.87256e+06	6.77326e+06	1.83671e+07	9.56768e+06	8.83094e+06	46.52	3.7365e+06	2.76978e+06	79.67	2.56	1.36	0.0029526	2.53	0.0288032	1.60235	305.046	153.1	2.6	Up
M305T293	306812	25429.2	23812.2	34843.5	253211	290386	30910.6	454270	375070	2.69617e+06	535598	36133	568028	3.62446e+06	2.88427e+06	2.45093e+06	1.64633e+06	1.50948e+06	85.29	177459	144027	95.34	9.28	3.21	0.0029526	2.53	0.0288032	1.44528	305.055	293.2	4.9	Up
M305T736	289106	394890	38583.3	290300	189500	92190.1	128084	110302	954572	1.9042e+06	1.50211e+06	348078	667995	423907	907913	785780	936820	846847	56.5	191619	158792	63.77	4.89	2.29	0.0003108	3.51	0.00655521	1.84662	305.081	736	12.3	Up
M305T98_2	152190	124403	208371	272034	262614	265813	153786	176936	346037	892286	442725	288379	357920	257014	320952	239327	393080	333494	53.83	202018	192654	29.07	1.95	0.96	0.004662	2.33	0.0380456	1.54634	305.147	97.9	1.6	Up
M306T204	73853	9748.72	78767.6	13181.4	66909.5	63158.5	102292	100250	127423	122200	143529	163060	168513	177125	123108	130558	144439	137044	15.32	63520.1	70381.3	55.27	2.27	1.19	0.0001554	3.81	0.00449411	1.56851	305.893	203.9	3.4	Up
M306T33	39150.8	3526.27	66338.9	127653	61161.7	25662.4	58987.7	260819	384333	91228.6	110410	435600	91194.4	71063.1	88754.5	104703	172161	97966.1	85.89	80412.4	60074.7	101.27	2.14	1.1	0.0379176	1.42	0.147066	1.16873	306.252	33.1	0.6	Up
M306T363	159191	112894	163987	158042	115218	109021	140434	201064	74548	54689.1	60435.6	245575	79830.9	149501	68008.5	69333.9	100240	71941	65.61	144982	149238	21.98	0.69	-0.53	0.0379176	1.42	0.147066	1.26385	306.077	363.1	6.1	Down
M306T389	221331	146716	167510	117856	89755.4	142718	138734	182336	216832	267017	174976	170757	175764	289178	277968	414602	248387	241924	33.41	150870	144717	26.62	1.65	0.72	0.00699301	2.16	0.0487438	1.5358	306.062	388.6	6.5	Up
M306T79	1.05202e+06	9.8729e+06	5.21966e+06	5.35739e+06	4.15617e+06	5.19468e+06	8.53875e+06	8.91559e+06	5.1554e+06	592922	6.84747e+06	1.37881e+06	1.63871e+06	631330	558568	702659	2.18823e+06	1.04073e+06	111	6.0384e+06	5.28853e+06	48.28	0.36	-1.46	0.014763	1.83	0.078691	1.44815	306.066	79.5	1.3	Down
M306T98	538531	140708	153489	610851	119885	157815	170643	412619	595553	687674	832310	781370	562374	551295	499388	957407	683421	641614	23.5	288068	164229	69.59	2.37	1.25	0.0029526	2.53	0.0288032	1.77807	306.047	98.4	1.6	Up
M307T317	11290.3	2721.38	10260.4	8973.18	1645.24	722.606	63948	5751.18	259930	94396.4	332167	230369	147138	281458	198038	211276	219347	220822	34.33	13164	7362.18	158.83	16.66	4.06	0.0001554	3.81	0.00449411	2.11105	307.123	317	5.3	Up
M307T597	3623.44	75802.3	3968.91	3318.69	4645.75	1589.48	82414.2	3276.33	185245	282123	366197	229167	353239	359772	452566	429378	332211	356506	28.1	22329.9	3796.18	157.19	14.88	3.9	0.0001554	3.81	0.00449411	2.05082	306.982	596.6	9.9	Up
M307T720	77809.3	41994.5	36362.4	5336.5	99489.3	78347.4	87801.3	73199.4	107654	142169	114376	74278.9	165498	116720	146962	186792	131806	129445	27.08	62542.5	75504.4	50.49	2.11	1.08	0.0018648	2.73	0.0213197	1.35354	307.177	720.1	12	Up
M307T810	407430	3.25063e+06	1.00267e+06	650072	451784	695829	1.08699e+06	944383	413122	315011	369804	552805	354909	365207	272066	507166	393761	367505	23.99	1.06122e+06	820106	86.6	0.37	-1.43	0.0029526	2.53	0.0288032	1.55256	307.077	809.8	13.5	Down
M307T94	1.45788e+06	2.13767e+06	1.84614e+06	1.55907e+06	2.31416e+06	3.55171e+06	1.66988e+06	1.78504e+06	1.08959e+06	1.14356e+06	1.67694e+06	1.5716e+06	1.53652e+06	1.59055e+06	1.83566e+06	900594	1.41813e+06	1.55406e+06	23.23	2.04019e+06	1.81559e+06	33.03	0.7	-0.52	0.0379176	1.42	0.147066	1.40346	307.066	93.6	1.6	Down
M308T103	1.14672e+06	1.09205e+06	1.44258e+06	1.10133e+06	758547	671215	1.27319e+06	1.20098e+06	969643	2.06252e+06	1.44503e+06	1.33975e+06	2.24611e+06	1.91738e+06	1.99353e+06	2.45564e+06	1.8037e+06	1.95545e+06	27.93	1.08583e+06	1.12403e+06	23.57	1.66	0.73	0.00699301	2.16	0.0487438	1.62612	308.056	103.4	1.7	Up
M308T84	337777	497587	427064	483667	59382.7	517675	317778	317918	624832	1.89154e+06	781484	366424	848053	1.48637e+06	1.67875e+06	1.9454e+06	1.20286e+06	1.16721e+06	51.34	369856	382420	40.52	3.25	1.7	0.0018648	2.73	0.0213197	1.57672	307.996	84	1.4	Up
M309T293	182707	41702.5	147657	39077.4	183155	216779	299233	223365	15449.9	6242.98	16103.2	206268	16145.7	195472	26487.5	156507	79834.5	21316.6	111.8	166709	182931	53.69	0.48	-1.06	0.0498834	1.3	0.173853	1.20742	309.101	292.7	4.9	Down
M309T529	1126.08	8685.12	5855.95	3964.01	6503.16	4310.1	1071.56	2999.7	26745.2	28658.4	7317.62	6664.81	1369.27	103403	85041	44884.1	38010.5	27701.8	99.52	4314.46	4137.05	61.2	8.81	3.14	0.0104118	1.98	0.0628046	1.38215	309.103	529.4	8.8	Up
M309T590	25469.7	30301.1	28063.6	34694.4	23045.9	20370.1	16770.1	25106.8	39061.7	126262	51589	32137.3	57384.4	57640.2	60097.7	71528.8	61962.6	57512.3	46.42	25477.7	25288.2	22.15	2.43	1.28	0.0003108	3.51	0.00655521	1.85501	309.116	590.2	9.8	Up
M309T689	1.1743e+06	732841	1.6624e+06	806424	753793	4.04848e+06	1.28301e+06	1.0401e+06	4.62213e+06	4.35025e+06	5.01876e+06	2.03077e+06	1.86363e+06	1.87398e+06	1.7768e+06	1.40648e+06	2.86785e+06	1.95237e+06	52.59	1.43767e+06	1.1072e+06	76.56	1.99	1	0.004662	2.33	0.0380456	1.34359	309.17	689.5	11.5	Up
M309T704	733575	397881	981777	357326	178332	514487	382069	440459	2.4429e+06	6.77009e+06	1.14438e+06	1.91762e+06	2.2645e+06	1.08502e+06	3.53964e+06	3.01897e+06	2.77289e+06	2.3537e+06	65.69	498238	419170	50.24	5.57	2.48	0.0001554	3.81	0.00449411	1.96341	309.17	703.6	11.7	Up
M309T746	48670.7	102519	66345.9	81573.8	56187.4	62342.1	58979.9	53410	455671	405838	185374	127962	259184	429882	431347	718395	376707	417860	49.35	66253.6	60661	26.72	5.69	2.51	0.0001554	3.81	0.00449411	2.05784	309.101	746	12.4	Up
M309T788_1	2.97428e+07	1.53796e+07	2.67932e+07	2.16746e+07	2.32592e+07	2.29311e+07	7.6404e+06	2.15001e+07	1.82782e+07	5.94403e+06	1.13651e+07	2.97475e+07	6.06876e+06	5.93409e+06	8.89769e+06	8.11263e+06	1.17935e+07	8.50516e+06	70.79	2.11151e+07	2.23028e+07	32.49	0.56	-0.84	0.0498834	1.3	0.173853	1.34466	309.174	787.9	13.1	Down
M309T84	1.88601e+06	1.2618e+06	1.8441e+06	1.39601e+06	2.02858e+06	1.58381e+06	2.5161e+06	1.62765e+06	2.31466e+06	2.17575e+06	2.09852e+06	1.88976e+06	2.01863e+06	2.77185e+06	1.81933e+06	2.66353e+06	2.219e+06	2.13714e+06	15.58	1.76801e+06	1.73588e+06	22.38	1.26	0.33	0.0281274	1.55	0.119973	1.3463	308.915	83.5	1.4	Up
M309T94	1.02372e+06	907460	1.0872e+06	847075	805999	709481	1.15601e+06	1.10073e+06	1.06378e+06	1.06349e+06	1.06115e+06	1.0917e+06	1.21127e+06	1.20249e+06	1.10893e+06	1.21223e+06	1.12688e+06	1.10031e+06	6.18	954709	965589	16.81	1.18	0.24	0.0379176	1.42	0.147066	1.45614	309.13	93.6	1.6	Up
M310T122_2	467795	434750	574938	353941	496526	323679	392463	420776	1.81555e+06	9.83339e+06	2.39952e+06	586682	908325	4.32939e+06	4.82399e+06	929779	3.20333e+06	2.10753e+06	97.09	433108	427763	18.59	7.4	2.89	0.0001554	3.81	0.00449411	1.79569	310.095	122.1	2	Up
M310T232	136976	50709.3	185350	120639	126654	21796.8	188943	59839.5	249809	364966	155852	228213	185681	192772	362444	269900	251205	239011	31.2	111363	123646	55.59	2.26	1.17	0.0010878	2.96	0.0151734	1.64334	310.115	232	3.9	Up
M310T354	70308.8	164204	85338.6	59784.5	132339	104211	67013	53584.1	6.58972e+06	2.89008e+06	2.33131e+06	4.66098e+06	4.92534e+06	3.87045e+06	2.8966e+06	4.49164e+06	4.08202e+06	4.18104e+06	33.94	92097.9	77823.7	42.34	44.32	5.47	0.0001554	3.81	0.00449411	2.25967	310.114	353.8	5.9	Up
M310T379	124849	166897	238102	250522	204445	348709	199214	206643	315691	1.16646e+06	344341	246427	456976	347989	484207	560100	490274	402482	59.45	217423	205544	30.36	2.25	1.17	0.0029526	2.53	0.0288032	1.60155	310.087	378.6	6.3	Up
M310T583	458321	413508	445408	493448	573598	140078	522323	309260	752498	475364	981383	955880	629638	1.15922e+06	908210	807184	833672	857697	25.87	419493	451864	32.76	1.99	0.99	0.0010878	2.96	0.0151734	1.73659	310.201	583.4	9.7	Up
M310T672	132869	146320	190231	138084	217311	114941	378810	578003	873562	493805	531788	784489	803238	295360	392581	400403	571903	512796	38.28	237071	168276	68.15	2.41	1.27	0.004662	2.33	0.0380456	1.74494	310.174	672.2	11.2	Up
M310T69	2.15794e+06	2.22474e+06	544027	420732	572533	1.62848e+06	2.26319e+06	452044	2.17108e+06	2.14247e+06	2.6232e+06	2.33812e+06	2.04348e+06	3.65181e+06	2.40019e+06	2.53822e+06	2.48857e+06	2.36916e+06	20.51	1.28296e+06	1.10051e+06	67.29	1.94	0.96	0.0104118	1.98	0.0628046	1.44856	310.023	69.1	1.2	Up
M310T788	2.41446e+06	2.71085e+06	2.55367e+06	4.16686e+06	2.7877e+06	2.7786e+06	680446	3.8676e+06	2.669e+06	518861	1.21314e+06	2.06997e+06	557263	497420	821871	786913	1.14181e+06	804392	70.78	2.74502e+06	2.74472e+06	38.19	0.42	-1.27	0.00699301	2.16	0.0487438	1.522	310.176	787.9	13.1	Down
M311T223	19904.3	13066.7	15568.8	15350.1	13671.4	11977.7	20769.8	12956.7	8577.15	8629.21	13817.3	10799.3	12629.5	13724	11125.6	8192.64	10936.8	10962.5	21.14	15408.2	14510.8	21.28	0.71	-0.49	0.014763	1.83	0.078691	1.46653	311.028	223.3	3.7	Down
M311T303	172816	168290	184164	181209	97228.8	111750	186760	112541	314582	129273	282244	399781	305895	406585	446540	472167	344633	357182	32.2	151845	170553	24.86	2.27	1.18	0.0029526	2.53	0.0288032	1.807	311.006	303.1	5.1	Up
M311T377	53007	42154.3	61078.7	10345.1	36040	42160.4	43523.3	44309	15975.1	2814.91	2469.84	14009.3	9313.86	10232.5	995.693	16505.5	9039.6	9773.2	69.55	41577.2	42841.8	35.55	0.22	-2.2	0.0010878	2.96	0.0151734	1.76588	311.074	377.3	6.3	Down
M311T783	5.29079e+07	2.7083e+07	5.26274e+07	2.65203e+07	5.15452e+07	2.51197e+07	5.65922e+07	6.52349e+07	2.78463e+07	6.34955e+06	2.26653e+07	2.14114e+07	6.33345e+07	1.76106e+07	1.04603e+07	1.23971e+07	2.27594e+07	1.9511e+07	78.4	4.47038e+07	5.20863e+07	35.51	0.51	-0.97	0.0206682	1.68	0.0984557	1.37635	311.221	782.6	13	Down
M311T784_1	2.10805e+07	1.07074e+07	6.43401e+07	2.05444e+07	6.24818e+07	9.54407e+06	2.20865e+07	6.17335e+07	9.95439e+07	1.16552e+08	1.23454e+08	3.68462e+07	1.25168e+08	9.50814e+07	1.71287e+08	6.91172e+07	1.04631e+08	1.08048e+08	38.46	3.40648e+07	2.15835e+07	71.32	3.07	1.62	0.0010878	2.96	0.0151734	1.77192	311.168	783.8	13.1	Up
M312T102_2	19621.1	41601.1	97201.8	155736	148625	21777.3	43196.6	76025.2	115858	1.48575e+06	164626	95782.7	143595	2.84575e+06	3.89945e+06	2.38079e+06	1.39145e+06	825187	107.84	75473	59610.9	71.63	18.44	4.2	0.00699301	2.16	0.0487438	1.60473	312.094	102.4	1.7	Up
M312T107	189057	90971.8	165961	132373	166538	46643.9	57830.4	64165.3	224106	395901	312352	290506	135176	136895	240119	128087	232893	232112	41.72	114193	111672	49.25	2.04	1.03	0.0206682	1.68	0.0984557	1.52194	312.08	107.3	1.8	Up
M312T286	1.12417e+06	1.19779e+06	801136	1.62794e+06	1.2718e+06	1.39295e+06	1.5867e+06	1.81366e+06	1.61465e+06	2.47909e+06	2.34578e+06	2.14666e+06	2.14325e+06	1.69417e+06	1.85973e+06	1.94115e+06	2.02806e+06	2.0422e+06	15.03	1.35202e+06	1.33238e+06	23.91	1.5	0.58	0.0010878	2.96	0.0151734	1.70347	312.002	286.5	4.8	Up
M312T303_1	328787	762477	469537	872792	695230	175964	721665	419544	248205	113750	299402	471404	276030	31659.5	158068	207597	225765	227901	58.94	555750	582384	43.65	0.41	-1.3	0.0104118	1.98	0.0628046	1.3546	312.002	302.6	5	Down
M312T320	7128.91	8879.98	724291	18062	15621.6	10164.1	11831.4	17800.2	751688	343015	15343	662499	26147.7	1.08554e+06	2.72578e+06	601531	776444	632015	111.75	101722	13726.5	247.33	7.63	2.93	0.0104118	1.98	0.0628046	1.54022	312.075	320.3	5.3	Up
M312T73	570458	285643	564042	326702	497275	473456	351021	290238	562069	439355	561348	597884	549619	637581	545380	611179	563052	561708	10.59	419854	412238	28.55	1.34	0.42	0.0379176	1.42	0.147066	1.44158	312.047	72.8	1.2	Up
M312T759	1.31443e+06	2.91635e+06	1.13745e+06	1.49342e+06	1.08121e+06	1.30138e+06	2.46779e+06	1.21693e+06	2.9061e+06	8.59704e+06	8.00956e+06	5.11342e+06	7.86268e+06	3.57674e+06	4.79007e+06	1.21286e+07	6.62303e+06	6.48805e+06	46.5	1616120	1.30791e+06	42.46	4.1	2.03	0.0003108	3.51	0.00655521	2.01161	312.225	759	12.7	Up
M312T767	1.15019e+07	9.95766e+06	7.08077e+06	4.23786e+07	1.31888e+07	8.7383e+06	7.05687e+06	9.66026e+06	9.21902e+06	1.1385e+07	3.41901e+06	8.53262e+06	2.56159e+06	3.52333e+06	3.62816e+06	4.33617e+06	5.82561e+06	3.98216e+06	57.5	1.36954e+07	9.80896e+06	85.97	0.43	-1.23	0.0206682	1.68	0.0984557	1.41927	312.226	767	12.8	Down
M312T89	424975	411696	497316	371447	446710	412366	301063	553834	334884	290207	301400	214747	415233	398000	374010	324278	331595	329581	19.59	427426	418671	17.87	0.78	-0.37	0.0281274	1.55	0.119973	1.33191	312.061	89.4	1.5	Down
M313T104	28729.3	38689.2	31282.4	37587.6	20245.5	16572.5	30133	33458.7	44799.8	51771.7	50416	42609.8	40034.4	65969.7	64205.8	82156.9	55245.5	51093.8	26.1	29587.3	30707.7	26.25	1.87	0.9	0.0001554	3.81	0.00449411	1.8395	313.151	104.2	1.7	Up
M313T304	101642	13865.2	16726.4	20410.7	16179.3	9949.15	21495.7	104379	103252	25810	89054.6	20171.5	99772	150809	117445	137653	92996.1	101512	51.28	38081.1	18568.6	105.68	2.44	1.29	0.0281274	1.55	0.119973	1.39922	313.089	303.8	5.1	Up
M313T484	144803	133100	125123	106478	144518	135493	94369.2	223397	186383	273665	244954	159081	349961	245509	283064	277521	252518	259587	23.53	138410	134296	27.95	1.82	0.87	0.000621601	3.21	0.0104451	1.83151	313.118	484.2	8.1	Up
M313T574	707913	308117	340889	733936	499854	201683	348404	372432	1.62153e+06	1.13295e+06	2.12456e+06	1.10986e+06	1.90013e+06	405940	2.96396e+06	1.43173e+06	1.58633e+06	1.52663e+06	48.46	439153	360418	43.78	3.61	1.85	0.0010878	2.96	0.0151734	1.88871	313.118	573.7	9.6	Up
M313T579	126446	63613.9	182292	162112	155692	56150.3	73815.2	78262.4	399150	182026	579176	134976	370287	620681	268244	532781	385915	384719	47.26	112298	102354	44.68	3.44	1.78	0.0018648	2.73	0.0213197	1.86204	313.202	579.3	9.7	Up
M313T727	1.42684e+06	2.04094e+06	1.89174e+06	1.006e+06	1.00936e+06	981684	1.04723e+06	1.0822e+06	901409	547528	812684	1.05974e+06	1.00464e+06	579413	602386	1.67927e+06	898385	857047	41.37	1.31075e+06	1.06471e+06	32.85	0.69	-0.54	0.0281274	1.55	0.119973	1.2101	313.238	727.5	12.1	Down
M313T784_2	711633	546796	739051	454001	777945	351119	1.00075e+06	744372	1.06001e+06	897508	508292	844577	810639	1.1213e+06	755317	951069	868588	871043	21.96	665709	725342	30.91	1.3	0.38	0.0379176	1.42	0.147066	1.12114	313.176	783.9	13.1	Up
M313T793	6.41148e+06	5.77125e+06	5.90423e+06	1.07922e+07	3.86397e+06	3.02968e+06	4.89616e+06	6.48355e+06	7.58988e+06	7.38642e+06	6.7789e+06	6.19397e+06	7.51355e+06	6.55135e+06	7.55933e+06	7.76072e+06	7.16676e+06	7.44998e+06	8.05	5.89406e+06	5.83774e+06	39.5	1.22	0.28	0.0206682	1.68	0.0984557	1.10886	313.238	793.1	13.2	Up
M313T834	4.24007e+06	1.672e+06	3.97921e+06	2.85148e+06	1.85498e+06	3.01334e+06	1.54364e+06	1.14085e+06	1.00146e+07	2.14986e+07	3.43245e+07	1.17892e+07	2.57185e+07	2.54992e+07	3.00031e+07	2.15955e+07	2.25554e+07	2.35474e+07	37.01	2.53695e+06	2.35323e+06	45.81	8.89	3.15	0.0001554	3.81	0.00449411	2.16926	313.237	834.3	13.9	Up
M314T303	21760.7	6674.45	71927.2	38618.1	22223.9	36905.4	30867	17049	35410.1	724597	20817.7	42098.9	36492.3	386493	121270	435134	225289	81684.6	115.9	30753.2	26545.5	64.05	7.33	2.87	0.0498834	1.3	0.173853	1.31723	313.997	302.6	5	Up
M314T417	51454.3	67507	90197	46404.4	94385.7	160379	65756.8	50565.8	33676.9	25561	44400.6	50432.3	33830.2	63618.7	58186.6	7965.55	39709	39115.4	45.93	78331.2	66631.9	48.05	0.51	-0.98	0.00699301	2.16	0.0487438	1.40704	314.102	417.3	7	Down
M314T76	2.66346e+06	2.7456e+06	2.78416e+06	2.17086e+06	2.80079e+06	3.19207e+06	2.32741e+06	700046	3.11753e+06	3.67059e+06	3.62783e+06	2.92229e+06	3.87774e+06	2.2356e+06	4.20852e+06	2.71572e+06	3.29698e+06	3.37268e+06	20.03	2.42305e+06	2.70453e+06	31.46	1.36	0.44	0.0379176	1.42	0.147066	1.03678	314.019	76.1	1.3	Up
M314T835	4.9862e+06	2.51366e+06	6.14144e+06	838471	7.01701e+06	2.49926e+06	6.36881e+06	4.40353e+06	1.46568e+06	2.6243e+06	1.09846e+06	1.96202e+06	1.26154e+06	2.70677e+06	606247	2.58898e+06	1.78925e+06	1.71385e+06	44.65	4.34605e+06	4.69486e+06	50.66	0.41	-1.28	0.0498834	1.3	0.173853	1.30827	314.241	834.5	13.9	Down
M315T219	652587	3.23994e+06	367666	420410	210472	154839	387268	323851	101716	226955	404647	509459	103301	149689	124399	131097	218908	140393	70.67	719629	377467	143.02	0.3	-1.72	0.0498834	1.3	0.173853	1.18154	315.083	219.1	3.7	Down
M315T431	18525.9	24089	19821.8	40802.6	97194	61450.3	11166.4	29234.4	114744	217779	148840	23633	158261	65321	36174	166074	116353	131792	59.19	37785.5	26661.7	75.93	3.08	1.62	0.014763	1.83	0.078691	1.41281	315.102	430.5	7.2	Up
M315T548	1535.02	830.599	1347.52	5950.8	432.817	454.964	1055.07	18721.6	784.25	11175.4	37932.1	7611.56	12594.7	17559.8	69098.9	26819.8	22947.1	15077.2	95.63	3791.05	1201.29	166.02	6.05	2.6	0.0206682	1.68	0.0984557	1.58329	315.138	548.5	9.1	Up
M315T661	212795	62928.9	223715	7003.95	306456	173610	186094	117298	65225.2	27426.5	22374.6	60671.1	27044.8	120159	49935.8	26375.5	49901.5	38681.2	66.14	161238	179852	59.21	0.31	-1.69	0.0281274	1.55	0.119973	1.12273	315.2	661	11	Down
M315T81	4.46414e+06	4.11554e+06	5.82111e+06	1.89811e+06	6.34171e+06	7.13198e+06	5.54569e+06	5.52631e+06	3.39948e+06	983493	940858	4.66657e+06	3.11567e+06	3.73102e+06	2.94179e+06	3.2693e+06	2.88102e+06	3.19248e+06	44.98	5.10557e+06	5.536e+06	31.58	0.56	-0.83	0.0104118	1.98	0.0628046	1.31913	315.095	80.7	1.3	Down
M315T91	98444	268721	94822.7	302909	533604	98538.6	91992.9	101168	345590	452260	442303	385529	324638	446813	547301	711563	457000	444558	27.22	198775	99853.5	80.6	2.3	1.2	0.004662	2.33	0.0380456	1.67697	315.093	91.1	1.5	Up
M316T100	1.21691e+06	1.3551e+06	1.20365e+06	1.45396e+06	1.22921e+06	1.01319e+06	1.15027e+06	1.23659e+06	1.62332e+06	1.44549e+06	1.56399e+06	1.30864e+06	1.51169e+06	1.66781e+06	1.5896e+06	1.89102e+06	1.57519e+06	1.5768e+06	10.81	1.23236e+06	1.22306e+06	10.63	1.28	0.35	0.0010878	2.96	0.0151734	1.82342	316.114	100.1	1.7	Up
M316T506	43165.7	91799	20181.1	106499	49035.9	106120	65161	87231.8	90551.6	282999	135286	86316.9	105133	75494.3	266774	110824	144172	107979	57.41	71149.2	76196.4	44.65	2.03	1.02	0.0498834	1.3	0.173853	1.28292	316.122	506.3	8.4	Up
M316T576_2	39831.8	31428.8	45265.5	34527	35070.2	35194	40957.1	39569.2	67254.3	219168	107073	109492	79452.2	78093.9	103349	136351	112529	105211	43	37730.4	37381.6	11.79	2.98	1.58	0.0001554	3.81	0.00449411	2.09305	316.158	576.2	9.6	Up
M316T671	10345.5	19030.8	31165.1	16551.8	6512.56	7546.23	26685	27354	81437.2	209158	122998	74207	92006.9	63018	68331	196999	113519	86722.1	51.4	18148.9	17791.3	52.65	6.25	2.64	0.0001554	3.81	0.00449411	2.0804	316.195	671.1	11.2	Up
M316T804	3.29692e+06	4.02329e+06	3.69307e+06	6.90177e+06	4.06403e+06	1.77664e+06	1.37148e+06	2.05672e+06	2.86074e+06	480260	2.61221e+06	881526	1.88083e+06	665731	732085	585539	1.33737e+06	806805	72.42	3.39799e+06	3.49499e+06	51.87	0.39	-1.35	0.0104118	1.98	0.0628046	1.51323	316.257	803.9	13.4	Down
M317T100_2	62330.8	31544.8	84862.9	46934.4	119433	43456.9	67688	72060.5	149319	152885	119283	162229	159079	131417	132025	163108	146168	151102	11.29	66038.9	65009.4	41.76	2.21	1.15	0.0003108	3.51	0.00655521	1.98081	317.172	99.8	1.7	Up
M317T126_1	182502	176989	284951	278452	128807	211059	229228	181085	219995	192967	205274	305132	241002	346484	296070	291764	262336	266383	20.99	209134	196780	25.52	1.25	0.33	0.0498834	1.3	0.173853	1.08791	317.02	125.6	2.1	Up
M317T302	9461.66	13175.5	14698.7	15709.6	20306.9	20783.8	13504.1	15264.8	32155.6	81883.3	52276.5	15011.7	42865.4	16962.6	31717.4	29400.6	37784.2	31936.5	57.22	15363.1	14981.8	24.29	2.46	1.3	0.004662	2.33	0.0380456	1.62044	316.962	302.4	5	Up
M317T724	8.08119e+06	5.93095e+06	3.1779e+06	5.28171e+06	6.16219e+06	1.74035e+06	4.89266e+06	9.96877e+06	1.31609e+07	1.42072e+07	1.06952e+07	1.09933e+07	1.26501e+07	1.17515e+07	1.00985e+07	4.87187e+06	1.10536e+07	1.13724e+07	25.74	5.65446e+06	5.60633e+06	45.83	1.95	0.97	0.004662	2.33	0.0380456	1.56884	316.936	723.9	12.1	Up
M317T84	5.32729e+06	2.14283e+06	6.73361e+06	3.09252e+06	3.33831e+06	3.17651e+06	2.41075e+06	676922	5.63146e+06	1.27681e+07	4.26342e+06	8.57547e+06	3.59793e+06	2.84786e+07	2.22408e+07	4.06367e+07	1.5774e+07	1.06718e+07	85.25	3.36234e+06	3.13452e+06	56.14	4.69	2.23	0.0029526	2.53	0.0288032	1.54364	316.946	84	1.4	Up
M318T269	641956	332494	696288	302127	542588	459349	581042	279535	811836	2.21252e+06	1.66725e+06	913940	1.03651e+06	938828	1.24123e+06	1.0827e+06	1.2381e+06	1.05961e+06	38.31	479422	500969	33.55	2.58	1.37	0.0001554	3.81	0.00449411	1.9424	318.061	268.9	4.5	Up
M318T34	119058	111942	135469	90882	129630	114025	123248	138478	134560	142777	160687	148218	138244	134213	126920	134433	140006	136402	7.5	120341	121153	12.69	1.16	0.22	0.0206682	1.68	0.0984557	1.47753	317.83	33.7	0.6	Up
M318T66	11430.4	2340.26	11120.8	2368.1	10589.7	9806.97	9905.69	2157.42	1394.17	8572.67	2197.09	2141.09	2101.18	9496.75	2091.84	2260.31	3781.89	2169.09	86.27	7464.92	9856.33	57.89	0.51	-0.98	0.0104118	1.98	0.0628046	1.06445	317.513	66	1.1	Down
M318T708	825033	228482	661043	859304	765309	1.45175e+06	1.85362e+06	731139	455752	311503	327499	441743	635510	315958	557011	323686	421083	384621	29.41	921960	795171	54.57	0.46	-1.13	0.0104118	1.98	0.0628046	1.36654	318.179	707.7	11.8	Down
M318T73_2	1.87412e+06	2.11124e+06	1.43045e+06	1.97587e+06	1.76402e+06	1.25326e+06	1.65395e+06	1.63033e+06	274471	346608	334632	387332	273894	222962	241625	320678	300275	297575	18.71	1.71165e+06	1.70898e+06	16.49	0.18	-2.51	0.0001554	3.81	0.00449411	2.26525	318.094	73.1	1.2	Down
M319T107_2	133614	128251	508194	334650	427274	376307	333550	161589	406771	436562	493280	228208	487695	492437	674031	454545	459191	471120	26.78	300429	334100	47.75	1.53	0.61	0.0379176	1.42	0.147066	1.22546	319.068	107.3	1.8	Up
M319T149	658097	784400	663242	661795	847496	866256	531959	551563	422360	546096	532840	540125	452676	683531	682451	368626	528588	536482	21.54	695601	662518	18.12	0.76	-0.4	0.0498834	1.3	0.173853	1.46397	319.027	148.6	2.5	Down
M319T221	125227	101647	79924	127012	124419	29944.8	82558	114199	50150.6	3119.65	49943.5	62987.9	41850.8	25405.9	5499.18	39121.4	34759.9	40486.1	62.26	98116.5	107923	33.92	0.35	-1.5	0.0029526	2.53	0.0288032	1.41638	319.03	220.6	3.7	Down
M319T466	99574.7	75595.7	140626	71156.1	93098.8	84455.9	99649.3	115021	96396.3	309831	348074	172033	269693	193669	232947	125475	218515	213308	40.31	97397.2	96336.8	23.09	2.24	1.17	0.0029526	2.53	0.0288032	1.79018	319.133	465.6	7.8	Up
M319T598	33050.6	23838.7	200144	124636	21987.4	15223.4	146451	225650	184974	230593	235700	250819	208801	175247	239785	242407	221041	233146	12.74	98872.7	78843.3	87.28	2.24	1.16	0.0029526	2.53	0.0288032	1.60709	319.176	597.6	10	Up
M319T68	176707	111426	155841	118196	107032	135173	112506	110505	146294	221903	206831	120861	134152	267064	251301	259825	201029	214367	29.55	128423	115351	19.86	1.57	0.65	0.0104118	1.98	0.0628046	1.5241	319.029	67.6	1.1	Up
M319T73	4.25001e+06	4.24594e+06	4.06565e+06	3.23788e+06	4.22565e+06	4.08322e+06	4.40838e+06	4.12118e+06	4.2241e+06	3.9573e+06	4.62059e+06	5.14795e+06	5.10415e+06	4.76244e+06	4.9869e+06	4.69044e+06	4.68673e+06	4.72644e+06	8.96	4.07974e+06	4.17342e+06	8.77	1.15	0.2	0.0281274	1.55	0.119973	1.44464	319.007	73	1.2	Up
M319T829	8.53921e+06	8.85976e+06	2.216e+07	8.49604e+06	1.88199e+07	1.44358e+07	2.0924e+07	8.31936e+06	3.04742e+07	3.27581e+07	2.74498e+07	2.39877e+07	3.25762e+07	2.40325e+07	3.24874e+07	2.25898e+07	2.82945e+07	2.8962e+07	15.26	1.38193e+07	1.16478e+07	43.8	2.05	1.03	0.0001554	3.81	0.00449411	1.84122	319.227	829.5	13.8	Up
M321T375	288828	603395	299747	174666	136563	103037	257585	198736	133137	12408.4	144432	217521	25671.7	68767.9	9946.66	42533.5	81802.2	55650.7	92.2	257820	228160	60.66	0.32	-1.66	0.00699301	2.16	0.0487438	1.52178	321.048	375	6.2	Down
M321T415	22652	52641.7	15493.9	92393.4	55328.2	52144.3	26383.5	39836.1	10591.7	11413.7	13144.9	17055.2	11155.9	14094.4	24567.3	6986.85	13626.2	12279.3	38.85	44609.2	45990.2	54.94	0.31	-1.71	0.0010878	2.96	0.0151734	1.83595	321.058	414.9	6.9	Down
M321T474	455769	564027	265699	904901	228908	525544	361388	607801	7617.39	382291	7119	18133.4	37782.5	7853.1	56916.5	80212.1	74740.6	27958	170.04	489255	490657	44.31	0.15	-2.71	0.0010878	2.96	0.0151734	1.89865	321.091	474.1	7.9	Down
M321T591	1.11064e+06	1.40599e+06	847534	1.4872e+06	1.23465e+06	634513	863922	1.15353e+06	881406	52238.9	910172	1.07008e+06	746198	99110.6	193083	560800	564137	653499	71.08	1.09225e+06	1.13208e+06	26.81	0.52	-0.95	0.0206682	1.68	0.0984557	1.23118	321.135	590.7	9.8	Down
M321T742	325479	228979	395805	365654	446979	335832	420161	237537	667891	492621	494421	779156	215118	912898	749033	630300	617680	649095	34.94	344553	350743	23.15	1.79	0.84	0.0104118	1.98	0.0628046	1.43801	321.183	741.7	12.4	Up
M322T431	91832.5	42587.5	90888.7	84015.6	60785.7	42024.4	114783	106245	160957	234030	62542.4	113933	94345.5	195255	161991	192940	151999	161474	37.9	79145.3	87452.2	35.02	1.92	0.94	0.0104118	1.98	0.0628046	1.50246	322.096	431.4	7.2	Up
M323T641	110714	100086	108792	92656.8	92936.4	107643	115726	77981.8	295216	87969	340202	180865	156267	208762	139173	148360	194602	168566	43.33	100817	103865	12.33	1.93	0.95	0.00699301	2.16	0.0487438	1.64222	322.976	641.3	10.7	Up
M323T665	10310.4	7095.5	10067.9	15662.8	4247.25	4972.54	3389.79	5833.46	39455.1	52971.9	41265.7	30015.9	70399.9	37390	43091.5	104212	52350.3	42178.6	46.31	7697.46	6464.48	53.25	6.8	2.77	0.0001554	3.81	0.00449411	2.13343	323.06	665.3	11.1	Up
M323T68	127601	156048	88858.8	142335	154625	156750	97209.6	130326	90121.7	90905.8	57954	117476	65789.7	116493	105424	71769.4	89491.8	90513.7	25.48	131719	136330	20.09	0.68	-0.56	0.0104118	1.98	0.0628046	1.61967	322.519	67.6	1.1	Down
M324T444	7297.33	4538.25	3765.2	5065.18	2591.53	2234.34	6754.24	6483.43	9374.88	11555.6	6342.88	6999.08	11784	5912.32	8336.86	11677.9	8997.94	8855.87	27.43	4841.19	4801.72	39.46	1.86	0.89	0.00699301	2.16	0.0487438	1.66094	324.054	444.2	7.4	Up
M324T641	82821.5	148745	69612.7	71698.8	118825	88406.4	136722	63860.1	336574	96404.9	193998	363113	302022	226781	178513	148772	230772	210389	41	97586.4	85613.9	33.53	2.36	1.24	0.0010878	2.96	0.0151734	1.70547	324.127	641.3	10.7	Up
M324T66	99870.9	105726	89084.7	104630	82964.9	68610.7	117286	104258	123297	114775	168228	129801	157785	100335	96491.9	111262	125247	119036	20.65	96554	102064	16	1.3	0.38	0.0281274	1.55	0.119973	1.45606	324.005	65.6	1.1	Up
M324T89	2.02461e+06	1.32042e+06	3.33325e+06	1.45551e+06	2.23743e+06	1.60022e+06	1.77055e+06	1.48909e+06	4.46538e+06	4.54349e+06	4.47987e+06	2.88654e+06	3.38618e+06	5.65932e+06	3.88146e+06	5.90426e+06	4.40081e+06	4.47262e+06	23.47	1903883	1.68538e+06	34.34	2.31	1.21	0.0003108	3.51	0.00655521	2.01912	324.036	88.9	1.5	Up
M325T152_2	3.52667e+07	5.54711e+07	4.93156e+07	5.53659e+07	6.91681e+07	1.4431e+08	5.99381e+07	5.11801e+07	3.12014e+07	2.78456e+07	4.08579e+07	4.39222e+07	4.39145e+07	5.4265e+07	6.4992e+07	2.06232e+07	4.09527e+07	4.23862e+07	35.18	6.5002e+07	5.54185e+07	51.48	0.63	-0.67	0.0379176	1.42	0.147066	1.27428	325.108	151.6	2.5	Down
M325T296	874449	869064	798075	952045	599792	401701	883254	950164	1.52707e+06	929417	1.1869e+06	1.23312e+06	1.31686e+06	834314	774092	968499	1.09628e+06	1.0777e+06	23.83	791068	871757	24.41	1.39	0.47	0.0498834	1.3	0.173853	1.36316	325.079	296.2	4.9	Up
M325T316	17190.6	13041.1	27298.5	19254.5	11906.2	14115.6	35188.1	89629.4	14048.3	750824	19220.6	26137.5	93441.4	908396	699339	815129	415817	396390	98.29	28453	18222.5	91.24	14.61	3.87	0.0498834	1.3	0.173853	1.36446	325.079	315.7	5.3	Up
M325T32	105888	17479.5	99829.1	19573	127764	100894	2821.71	110962	152517	166514	197766	98378.8	123819	161517	141924	129483	146490	147221	20.69	73151.4	100361	69.09	2	1	0.004662	2.33	0.0380456	1.23462	324.897	31.5	0.5	Up
M325T320	46354	51462.6	42934.8	48231.4	43581.8	42244.9	43055.2	45602.1	51612.8	45293.2	56128.1	53817.8	47919.2	47247	45390.2	52578.8	49998.4	49766	8.17	45433.4	44592	6.99	1.1	0.14	0.0379176	1.42	0.147066	1.32311	325.044	319.9	5.3	Up
M325T374_1	1.13673e+06	256267	866429	212353	724066	136107	344674	191181	1.75129e+06	1.18821e+06	2.14854e+06	1.9007e+06	1.43444e+06	68608.5	1.1848e+06	1.59707e+06	1.40921e+06	1.51576e+06	45.18	483476	300470	77.46	2.91	1.54	0.0104118	1.98	0.0628046	1.25095	324.908	374.2	6.2	Up
M325T374_2	585378	2.98878e+06	374189	27623	129413	233685	479313	102111	92349.6	2682.02	235594	264533	3056.53	5189.94	3176.05	19444.1	78253.3	12317	141.19	615061	303937	159.08	0.13	-2.97	0.014763	1.83	0.078691	1.46772	325.024	373.9	6.2	Down
M325T401	153191	154397	139055	136761	203619	85368.4	300298	339171	22543.6	95338.6	147188	133828	120399	98511.8	10281.4	96475.5	90570.7	97493.7	54.67	188983	153794	46.3	0.48	-1.06	0.0104118	1.98	0.0628046	1.2208	325.05	401.1	6.7	Down
M325T562	29527.7	7649.84	7531.04	7052.11	6978.09	18845.8	5188.93	4776.54	59345	33871.2	62222	19259.4	20711.6	67836.3	26083.8	82521.2	46481.3	46608.1	52.37	10943.8	7291.58	79.68	4.25	2.09	0.0010878	2.96	0.0151734	1.83076	324.976	562.4	9.4	Up
M325T594	720714	574759	657954	701023	583497	556548	455904	565087	890299	2.24488e+06	1.01167e+06	580561	985830	1.18298e+06	1.39214e+06	596066	1.11055e+06	998749	48.02	601936	579128	14.44	1.84	0.88	0.00699301	2.16	0.0487438	1.5018	325.202	593.7	9.9	Up
M325T652	463797	957199	435521	502551	585085	495489	1.1738e+06	631662	1.51639e+06	909503	1.58368e+06	1.76228e+06	1.57734e+06	329197	1.52839e+06	779903	1.24833e+06	1.52239e+06	40.78	655638	543818	40.74	1.9	0.93	0.0379176	1.42	0.147066	1.31676	325.204	652.4	10.9	Up
M325T67_2	163852	391544	150888	380112	173069	362779	370413	379934	160989	146448	153173	194831	154576	146323	162052	144038	157804	153875	10.39	296574	366596	37.56	0.53	-0.91	0.00699301	2.16	0.0487438	1.63243	325.034	66.8	1.1	Down
M325T782	5.87551e+07	6.77302e+06	1.04946e+08	4.86869e+06	8.57269e+07	4.06735e+07	8.78994e+07	3.32932e+07	2.34485e+06	6.61939e+06	1.59066e+07	7.22931e+06	1.03044e+07	1.60543e+07	9.98481e+06	7.19544e+06	9.45488e+06	8.60706e+06	49.74	5.2867e+07	4.97143e+07	71.54	0.18	-2.48	0.0498834	1.3	0.173853	1.41363	325.237	782.2	13	Down
M325T90_3	721271	729761	534231	602022	755664	497920	891853	479283	743787	834660	801689	781720	784576	803498	778760	824619	794164	793133	3.6	651501	661646	22.4	1.22	0.29	0.014763	1.83	0.078691	1.39801	325.142	90	1.5	Up
M326T119	98699.5	194002	96586.3	229996	549374	404954	58198.4	211676	314990	406659	276877	367300	326255	506080	675764	770774	455587	386980	39.7	230436	202839	73.13	1.98	0.98	0.0206682	1.68	0.0984557	1.34024	326.054	118.9	2	Up
M326T162	2.36654e+06	341469	1.40745e+06	1.9503e+06	701674	266074	1.51587e+06	436186	5.77784e+06	4.85977e+06	5.82012e+06	5.05558e+06	3.59721e+06	5.63559e+06	2.1116e+06	6.43996e+06	4.91221e+06	5.34558e+06	28.82	1.1232e+06	1.05456e+06	71.07	4.37	2.13	0.0003108	3.51	0.00655521	1.9497	326.11	162	2.7	Up
M326T327	1.03385e+06	4.14189e+06	3.77003e+06	3.87019e+06	1.9663e+06	2.21055e+06	5.51064e+06	1.78307e+06	7.64408e+06	4.27127e+06	3.75572e+06	7.20675e+06	4.29989e+06	6.60986e+06	9.51398e+06	8.73861e+06	6.50502e+06	6.90831e+06	33.51	3.03581e+06	2.99029e+06	49.78	2.14	1.1	0.004662	2.33	0.0380456	1.59193	326.124	327.4	5.5	Up
M326T374_1	1.07257e+07	1.06233e+07	9.82168e+06	1.31601e+07	9.97196e+06	7.25916e+06	9.49966e+06	9.05555e+06	9.92178e+06	65176.5	8.83186e+06	1.21475e+07	8.34773e+06	237735	98709.4	419699	5.00877e+06	4.38371e+06	104.9	1.00146e+07	9.89682e+06	16.7	0.5	-1	0.0498834	1.3	0.173853	1.28667	325.901	374.2	6.2	Down
M326T590	15189.7	9154.88	23031.9	6764.87	14036.5	5841.29	22079.1	8029.62	31076.5	161830	60728.6	19599.2	29853.4	45250.5	74919.5	59803.1	60382.6	52526.8	74.55	13016	11595.7	51.83	4.64	2.21	0.000621601	3.21	0.0104451	1.89017	326.106	589.8	9.8	Up
M326T597	247601	262632	243867	265314	198613	195588	240708	212525	242595	586002	536338	628716	690661	259264	658391	462222	508024	561170	34.24	233356	242287	11.81	2.18	1.12	0.004662	2.33	0.0380456	1.84875	326.168	596.7	9.9	Up
M326T641	170052	95522.3	140445	36258.7	82008.4	195282	113388	67519	442544	578209	186131	176818	543624	657639	572593	303260	432602	493084	43.4	112559	104455	47.49	3.84	1.94	0.000621601	3.21	0.0104451	1.81489	326.205	641.5	10.7	Up
M326T687	365856	113734	110929	115106	380379	91078.9	109943	296898	702510	235185	599875	673415	602235	441392	215117	675730	518182	601055	38.21	197990	114420	63.88	2.62	1.39	0.004662	2.33	0.0380456	1.69219	326.143	687.2	11.5	Up
M326T793	1.07247e+06	1.57906e+06	1.43808e+06	1.03271e+06	951693	475095	850347	906466	2.80743e+06	3.59789e+06	3.7136e+06	1.29934e+06	2.80945e+06	3.18416e+06	4.1639e+06	5.28855e+06	3.35804e+06	3.39103e+06	34.57	1.03824e+06	992202	33.18	3.23	1.69	0.000621601	3.21	0.0104451	1.99837	326.187	792.7	13.2	Up
M327T109	234818	511956	203065	252593	843141	1.19939e+06	186114	563444	534756	553821	650450	813467	1.03305e+06	1.37693e+06	1.5654e+06	1.62464e+06	1.01906e+06	923258	44.24	499315	382274	72.97	2.04	1.03	0.0281274	1.55	0.119973	1.32121	327.033	109.4	1.8	Up
M327T118	27340.7	11539.1	37862.6	32400.1	32542.5	109247	43778.6	29317.9	184528	507535	301339	186763	272347	176037	132266	395210	269503	229555	47.58	40503.6	32471.3	72.34	6.65	2.73	0.0001554	3.81	0.00449411	2.05336	327.121	117.7	2	Up
M327T240_2	43136.6	81979.6	35058.6	107182	63845.6	46844	96392.3	98741.2	183928	136506	102091	84267.4	251460	160041	130676	257894	163358	148273	39.35	71647.6	72912.6	39.28	2.28	1.19	0.0018648	2.73	0.0213197	1.69773	327.115	239.7	4	Up
M327T327	687791	621304	825018	752240	767097	802724	939868	715003	1.40907e+06	1.78847e+06	1.16916e+06	1.21508e+06	915903	975075	1.34229e+06	1.38224e+06	1.27466e+06	1.27868e+06	21.61	763881	759669	12.6	1.67	0.74	0.0003108	3.51	0.00655521	1.95144	327.128	327.3	5.5	Up
M327T335	12939.5	24754.2	8713.02	11012.7	245928	167997	13688.9	16230.6	25031.6	158422	124318	128983	138612	338009	504032	354038	221431	148517	72.1	62658	14959.7	146.18	3.53	1.82	0.0206682	1.68	0.0984557	1.45259	327.066	335.4	5.6	Up
M327T374	670956	425735	898694	399692	899882	668758	975602	687929	338877	63086.4	41145	366250	570377	569800	50093.7	479262	309861	352564	74.07	703406	679442	30.52	0.44	-1.18	0.004662	2.33	0.0380456	1.43204	326.905	374.2	6.2	Down
M327T381	49052.9	24196.5	26124.4	25991.8	28704.6	13106	19003.9	4396.34	87867.7	184343	85105.9	27767.8	17784.9	84004.7	24426.8	33984.3	68160.6	58994.5	81.64	23822.1	25094.2	54.64	2.86	1.52	0.0498834	1.3	0.173853	1.26578	327.114	380.7	6.3	Up
M327T483	19910.6	3549.87	11970.2	31976.9	18285.3	12232.5	25154.3	21809.2	47830.1	32656.1	29726.2	35689	25181.3	30886	22275.1	31327.6	31946.4	31106.8	24.03	18111.1	19097.9	48.64	1.76	0.82	0.004662	2.33	0.0380456	1.43957	327.053	482.7	8	Up
M327T687	81160.1	88301.6	84619	93689.7	89274.9	70682.9	83447	43217.2	104631	182832	175428	106910	95387	33006.6	171438	175924	130695	139174	41.37	79299	84033	20.29	1.65	0.72	0.0104118	1.98	0.0628046	1.07378	327.147	687.1	11.5	Up
M327T720	235826	48247.4	69860.2	41045.4	70514.1	51394.7	60475.6	51611.4	307386	181159	212993	201748	114254	175961	223011	329463	218247	207370	32.22	78621.9	56043.5	81.85	2.78	1.47	0.004662	2.33	0.0380456	1.89627	327.153	719.6	12	Up
M327T741_1	331222	1.49636e+06	1.3954e+06	1.28858e+06	1.62991e+06	2.13971e+06	1.63513e+06	1.6288e+06	236747	751383	916032	437819	1.16501e+06	987278	1.49582e+06	200667	773844	833707	59.23	1.44314e+06	1.56258e+06	35.69	0.54	-0.9	0.0104118	1.98	0.0628046	1.19456	327.215	741.2	12.4	Down
M327T78_1	1.31168e+07	1.56115e+07	1.12756e+07	6.39105e+06	5.60345e+06	7.44658e+06	1.12083e+07	1.16294e+07	2.90712e+06	2.98152e+06	2.26819e+06	9.9155e+06	2.989e+06	9.59001e+06	1.8604e+06	4.82279e+06	4.66682e+06	2.98526e+06	69.76	1.02853e+07	1.12419e+07	33.91	0.45	-1.14	0.004662	2.33	0.0380456	1.62604	326.978	77.8	1.3	Down
M327T787	8.00769e+06	1.17812e+06	6.11551e+06	268835	1.20351e+07	2.89248e+06	6.62835e+06	5.80055e+06	3.2802e+06	659163	79838.3	124093	1.01684e+06	1.00344e+06	158298	584948	863353	622056	121.17	5.36583e+06	5.95803e+06	71.64	0.16	-2.64	0.00699301	2.16	0.0487438	1.51658	327.223	786.8	13.1	Down
M327T89	900404	320244	778515	684741	1.10401e+06	421905	1.0884e+06	1.2568e+06	1.42272e+06	1.00531e+06	2.43662e+06	1.42526e+06	2.16858e+06	738169	1.13156e+06	1.14224e+06	1.43381e+06	1.28248e+06	40.75	819377	839460	40.69	1.75	0.81	0.0206682	1.68	0.0984557	1.45606	327.14	88.6	1.5	Up
M328T320	11640.6	9684.03	12017.5	11301.2	10868.3	9694.92	15942.9	10839.4	26562.5	122095	34848.6	27493.7	33695.3	86058.7	92974.8	81660.4	63173.6	58254.5	58.35	11498.6	11084.7	17.22	5.49	2.46	0.0001554	3.81	0.00449411	2.03508	328.045	320	5.3	Up
M328T344	375315	391626	131702	130232	420546	334361	490200	374115	596202	873391	647640	667636	686352	839956	581591	691381	698019	676994	15.17	331012	374715	39.7	2.11	1.08	0.0001554	3.81	0.00449411	1.73109	327.89	344.4	5.7	Up
M328T351	39832.1	46762.7	18667	90459.3	91493.2	26450.9	54777.7	57816.7	94245.7	320149	163180	97152	92601.1	88419.3	124044	23580.6	125421	95698.9	69.99	53282.5	50770.2	50.19	2.35	1.24	0.014763	1.83	0.078691	1.25356	328.052	351.3	5.9	Up
M328T612	571244	269562	383206	404616	293128	204430	305263	296358	138651	92078.3	103906	264908	111530	109230	58622.1	153790	129090	110380	47.95	340976	300811	32.91	0.38	-1.4	0.0003108	3.51	0.00655521	1.87269	328.22	611.9	10.2	Down
M328T636	173789	1.05758e+06	423494	1.46079e+06	334866	532859	423625	717270	298715	122186	281521	288906	260108	254093	204790	71442.9	222720	257101	37.68	640534	478242	66.49	0.35	-1.52	0.004662	2.33	0.0380456	1.53995	328.22	635.7	10.6	Down
M328T744	29427.9	55219.5	21773.4	26000.5	19443.3	12868.8	23329.3	17278.6	238948	58403.7	107212	77357.5	115205	128357	161878	62787.6	118769	111209	50.35	25667.7	22551.3	50.61	4.63	2.21	0.0001554	3.81	0.00449411	2.01739	328.168	744.3	12.4	Up
M328T75	4189.86	548108	179908	1.84935e+06	290759	424034	64907.2	797640	2.35549e+06	2.61827e+06	3.77237e+06	2.99818e+06	1.69462e+06	2.70969e+06	1.65881e+06	4.0518e+06	2.7324e+06	2.66398e+06	31.78	519862	357397	114.86	5.26	2.39	0.000621601	3.21	0.0104451	1.59644	328.034	75.2	1.3	Up
M329T117	69068	62898.3	62089.5	63484.2	54028.7	54512.3	61313.8	46631.5	85950.2	132547	82716.2	95145.9	85263.5	80881.1	86560.9	112817	95235.3	86255.5	19.14	59253.3	61701.7	11.91	1.61	0.68	0.0001554	3.81	0.00449411	1.97943	329.06	116.9	1.9	Up
M329T124	807091	964924	867766	670653	1.32755e+06	1.37459e+06	846780	769120	1.77121e+06	1.26861e+06	1.81421e+06	1.90256e+06	1.48534e+06	1.64914e+06	1.91154e+06	1.15259e+06	1.6194e+06	1.71018e+06	17.87	953559	857273	27.22	1.7	0.76	0.0018648	2.73	0.0213197	1.78301	329.02	124.4	2.1	Up
M329T167	1.30884e+06	1.03727e+06	1.0237e+06	1.47062e+06	1.25132e+06	1.60073e+06	1.34468e+06	1.2699e+06	728548	886455	889526	696213	1.05072e+06	1.41174e+06	1.11749e+06	1.01759e+06	974785	953558	23.66	1.28838e+06	1.28937e+06	15.22	0.76	-0.4	0.0206682	1.68	0.0984557	1.47334	329.02	166.8	2.8	Down
M329T326	179184	53060.4	184471	200511	30228	94068.7	186071	119889	383825	310701	229909	468818	276062	397965	501053	293519	357732	347263	26.84	130935	149536	50.63	2.73	1.45	0.0001554	3.81	0.00449411	1.78733	329.085	326.4	5.4	Up
M329T627	150846	248787	126306	214310	66663.5	155904	36770.1	79615.2	90069	22040.5	46790.2	37454	26407.9	59488	64799.5	24092.8	46392.7	42122.1	51.45	134900	138576	54.18	0.34	-1.54	0.00699301	2.16	0.0487438	1.64151	328.967	626.5	10.4	Down
M329T639	30917.1	37255.4	53047.7	26484.6	42368.3	26476	33613	13916.9	47120.7	359185	158878	38149.2	249530	85783.2	43802.9	140510	140370	113147	81.49	33009.9	32265.1	35.51	4.25	2.09	0.0018648	2.73	0.0213197	1.63016	329.175	638.9	10.6	Up
M329T67	80356.8	26695.6	25376.9	93194.1	67425.7	25373.3	25860.3	89736.8	88622.4	117072	139292	222116	26476.2	121771	117833	107503	117586	117452	46.2	54252.4	47060.7	57.72	2.17	1.12	0.00699301	2.16	0.0487438	1.37172	328.518	67.5	1.1	Up
M329T691	901262	202610	1.28987e+06	705283	990720	625013	877461	590754	1.51335e+06	1.53536e+06	1.39309e+06	2.00997e+06	1.97413e+06	1.29842e+06	1.54265e+06	1.23947e+06	1.56331e+06	1.52435e+06	18.35	772872	791372	41.7	2.02	1.02	0.0003108	3.51	0.00655521	1.72406	329.232	690.9	11.5	Up
M329T696	4.51851e+06	5.25864e+06	2.87075e+06	4.33269e+06	2.32445e+06	3.95805e+06	7.19168e+06	3.48973e+06	3.67855e+06	3.49285e+06	1.58797e+06	3.37552e+06	2.86139e+06	2.31548e+06	4.22317e+06	1.70374e+06	2.90483e+06	3.11846e+06	32.99	4.24306e+06	4.14537e+06	35.66	0.68	-0.55	0.0498834	1.3	0.173853	1.18102	329.151	696.4	11.6	Down
M329T762	3.78206e+06	3.07245e+06	2.36301e+06	5.76362e+06	2.20369e+06	2.45445e+06	2.08704e+06	1.80741e+06	1.80151e+06	225190	2.25541e+06	2.06699e+06	1.64844e+06	1.12011e+06	387754	1.56918e+06	1.38432e+06	1.60881e+06	53.98	2.94171e+06	2.40873e+06	44.17	0.47	-1.09	0.0018648	2.73	0.0213197	1.36572	328.986	761.6	12.7	Down
M329T793_3	8.94241e+08	1.41647e+09	1.73184e+09	1.78147e+09	1.19434e+09	9.06786e+08	1.36157e+09	7.55173e+08	2.66606e+09	2.24573e+09	4.72373e+09	1.88321e+09	2.10905e+09	1.55251e+09	2.18641e+09	1.09403e+09	2.30759e+09	2.14773e+09	47.04	1255236480	1.27795e+09	30.81	1.84	0.88	0.00699301	2.16	0.0487438	1.50992	329.258	793.1	13.2	Up
M329T818	791300	1.0839e+06	279732	1.08009e+07	1.12051e+07	431376	722560	1.10706e+06	1.55233e+07	1.57212e+07	1.79497e+07	918497	7.54611e+06	3.36544e+06	1.31997e+07	1.18467e+07	1.07588e+07	1.25232e+07	57.51	3.30274e+06	937598	144.19	3.26	1.7	0.0104118	1.98	0.0628046	1.46053	329.162	817.8	13.6	Up
M330T103	46160	9898.81	94039.8	51551	52607.7	47171.1	65299.6	49990.3	59729.8	319311	119049	135059	119088	145104	129512	286578	164179	132285	54.69	52089.8	50770.7	44.6	3.15	1.66	0.000621601	3.21	0.0104451	1.72053	330.096	102.6	1.7	Up
M330T152	2.26912e+06	5.30177e+06	1.95796e+06	2.72101e+06	838902	1.77303e+06	1.91415e+06	1.55534e+06	269709	11708.4	2.009e+06	2.30683e+06	367353	234129	13177	1.19251e+06	800551	318531	114.83	2.29141e+06	1.93605e+06	58.13	0.35	-1.52	0.0379176	1.42	0.147066	1.34539	330.067	152.5	2.5	Down
M330T648	1.11088e+06	1.01288e+06	1.22359e+06	1.12402e+06	1.01989e+06	978762	2.14359e+06	1.29257e+06	860744	566486	673237	1.25292e+06	1.00724e+06	1.05991e+06	955000	562858	867300	907872	28.71	1.23827e+06	1.11745e+06	30.8	0.7	-0.51	0.0206682	1.68	0.0984557	1.29847	330.236	648.5	10.8	Down
M330T818	101105	75270.6	65407.6	210385	1.21547e+06	632707	1.44149e+06	1.59241e+06	6.00808e+06	2.30155e+06	7.23441e+06	1.32264e+06	5.56095e+06	2.56218e+06	3.15907e+06	2.4945e+06	3.83042e+06	2.86063e+06	55.64	666780	421546	98.17	5.74	2.52	0.000621601	3.21	0.0104451	1.77278	329.664	817.8	13.6	Up
M331T302	28477	15729.6	34167.9	28819.6	30614.7	40259.9	28393.7	25150.4	8993.53	8621.13	15498.5	64645.8	8759.89	23166.9	7628.85	10452.3	18470.9	9722.92	104.86	28951.6	28648.3	24.34	0.64	-0.65	0.014763	1.83	0.078691	1.33279	331.061	302	5	Down
M331T364	38588.6	114210	32250.2	32829.2	32935.6	26914.9	34954.2	31569.9	358227	331995	505408	393714	285815	422009	480908	278447	382065	375970	22.07	43031.5	32882.4	67.26	8.88	3.15	0.0001554	3.81	0.00449411	2.21551	330.952	363.6	6.1	Up
M331T66	63533.1	66246.6	69618.6	75914	77169	66006.1	80004.8	66320.2	63589.8	53534.3	73371.7	72703.8	62041.6	58628.1	61148	50930.5	61993.5	61594.8	12.97	70601.6	67969.4	8.78	0.88	-0.19	0.0281274	1.55	0.119973	1.20678	331.045	66.1	1.1	Down
M331T674	1.87798e+06	2.49853e+06	1.74604e+06	1.58687e+06	1.31627e+06	2.16116e+06	2.13876e+06	2.96275e+06	2.41535e+06	4.6148e+06	3.54097e+06	4.42286e+06	9.10674e+06	3.69898e+06	2.49994e+06	4.84524e+06	4.39311e+06	4.06092e+06	48.04	2.03605e+06	2.00837e+06	25.77	2.16	1.11	0.0010878	2.96	0.0151734	1.69746	330.979	674	11.2	Up
M331T93	847933	832649	798643	671077	600271	455364	466012	752183	276707	37755.8	56461.5	889588	44883	330513	23583.7	69171.3	216083	62816.4	137.24	678017	711630	23.22	0.32	-1.65	0.0104118	1.98	0.0628046	1.72494	331.138	93.1	1.6	Down
M332T293	823870	680953	708330	797037	537117	411126	553227	615446	435692	344290	511790	901723	470905	365540	390995	409872	478851	422782	37.46	640888	648200	21.74	0.75	-0.42	0.0281274	1.55	0.119973	1.17007	332.072	293.3	4.9	Down
M332T357	190331	242726	195246	281171	142915	191376	211745	261153	108445	85807.2	108501	144096	132861	177210	122589	175783	131911	127725	24.71	214583	203495	20.87	0.61	-0.7	0.0010878	2.96	0.0151734	1.73901	332.044	357.2	6	Down
M332T374	116796	321667	135722	229165	524333	93707.6	152122	184434	916128	1.22353e+06	1.08634e+06	1.4924e+06	1.01998e+06	1.28986e+06	792567	589425	1.05128e+06	1.05316e+06	27.43	219743	168278	64.96	4.78	2.26	0.0001554	3.81	0.00449411	2.06621	331.899	374.2	6.2	Up
M332T64	5828.13	5860.48	6339.79	29882.3	34480.4	7126.14	6204.17	6675.32	36677.2	64697.5	34521.7	31134.2	35808.1	30713.3	27543.3	6657.39	33469.1	32828	47.36	12799.6	6507.56	94.01	2.61	1.39	0.0104118	1.98	0.0628046	1.49199	331.536	64.5	1.1	Up
M332T652	57961.7	46710.4	52880.9	40622.3	53240.1	43294	51124.2	46246.7	111800	268371	167657	239338	149701	137464	199455	295517	196163	183556	33.65	49010	48917.3	11.78	4	2	0.0001554	3.81	0.00449411	2.19703	332.132	652.1	10.9	Up
M332T750	333366	265457	860341	361678	490272	145113	205085	333428	113289	130168	180699	79997.7	354627	220784	160559	237905	184754	170629	46.94	374342	333397	59.41	0.49	-1.02	0.0281274	1.55	0.119973	1.27189	331.643	750.3	12.5	Down
M332T793	1.15133e+07	1.28188e+07	1.28226e+07	2.11972e+07	1.42639e+07	6.71276e+06	1.744e+07	4.64495e+06	1.76333e+07	3.98963e+07	1.93795e+07	2.45007e+07	1.9167e+07	1.26378e+07	1.73739e+07	1.33404e+07	2.04911e+07	1.84002e+07	42.32	1.26767e+07	1.28207e+07	42.09	1.62	0.69	0.0498834	1.3	0.173853	1.26192	332.257	793.1	13.2	Up
M333T108	508277	986721	1.0566e+06	1.07303e+06	789200	847481	567621	839674	509594	439243	498843	577687	714961	375016	374375	826597	539540	504219	29.85	833576	843578	25.22	0.65	-0.63	0.0104118	1.98	0.0628046	1.49463	333.075	107.7	1.8	Down
M333T123_1	1.70316e+06	1.81787e+06	2.13392e+06	2.19279e+06	2.31895e+06	1.97117e+06	1.60892e+06	1.97833e+06	1.01667e+06	611299	1.13428e+06	1.00369e+06	798421	1.49405e+06	1.95269e+06	1.07441e+06	1.13569e+06	1.04554e+06	36.76	1.96564e+06	1.97475e+06	12.5	0.58	-0.79	0.0010878	2.96	0.0151734	1.7718	333.057	123.4	2.1	Down
M333T149	170356	137740	161152	197354	193503	183286	216728	231002	207939	926904	183696	207205	217200	938941	925801	692867	537569	455034	67.92	186390	188394	16.16	2.88	1.53	0.014763	1.83	0.078691	1.40756	333.1	148.6	2.5	Up
M333T433	82698.3	268909	73124.4	50401.4	44795.9	36469.4	45445.7	46583.9	116246	256908	343015	216846	46968.8	215259	258715	254023	213498	235434	43.2	81053.5	48492.7	95.63	2.63	1.4	0.0206682	1.68	0.0984557	1.54721	333.062	433	7.2	Up
M333T460	13184.1	55341	89152.4	60876.9	11430.1	49528.9	20261	103559	5950.05	9961.82	16122.3	77830.5	6165.25	20500.4	4565.5	6178.92	18409.3	8070.37	133.98	50416.7	52435	68.19	0.37	-1.45	0.0281274	1.55	0.119973	1.38029	333.111	460.2	7.7	Down
M333T546	189477	325986	419053	237511	322058	380854	259396	174059	724494	3.38899e+06	329062	380524	1.10085e+06	1.11689e+06	1.65668e+06	1.4005e+06	1.26225e+06	1.10887e+06	77.41	288549	290727	30.57	4.37	2.13	0.0018648	2.73	0.0213197	1.70327	333.048	546	9.1	Up
M333T588	428677	504161	203391	448405	492149	238525	533604	515156	316763	53155.5	268276	401413	297217	103152	87857.2	75290.6	200391	185714	67.32	420509	470277	30.48	0.48	-1.07	0.0104118	1.98	0.0628046	1.43195	333.171	588.3	9.8	Down
M333T605	4.51735e+06	1.3122e+06	4.23736e+06	624886	2.52883e+06	2.82668e+06	1.47491e+06	990104	710877	35760.8	82627	420494	1.58236e+06	1.05094e+06	9691.88	1.58312e+06	684483	565686	96.54	2.31404e+06	2.00187e+06	63.63	0.3	-1.76	0.0281274	1.55	0.119973	1.39061	333.049	605.1	10.1	Down
M333T65	134606	149948	143630	162481	98232.4	88362	154581	186450	163607	183638	184600	170299	178715	166654	301131	180263	191113	179489	23.62	139786	146789	23.3	1.37	0.45	0.00699301	2.16	0.0487438	1.47165	333.011	64.7	1.1	Up
M333T670	557518	502434	424689	666709	273592	423518	528682	687919	763877	1.11196e+06	1.09925e+06	732266	660081	913238	655605	1.04917e+06	873181	838557	22.29	508133	515558	26.77	1.72	0.78	0.0018648	2.73	0.0213197	1.76558	332.904	670.5	11.2	Up
M333T84	1.65727e+07	2.56242e+07	1.35472e+07	2.39271e+07	1.6841e+07	7.58113e+06	1.91385e+07	1.44352e+07	1.34327e+07	5.61833e+06	1.55761e+07	1.96876e+07	9.73395e+06	6.22506e+06	4.59827e+06	7.73947e+06	1.03264e+07	8.73671e+06	52.24	1.72084e+07	1.67068e+07	33.6	0.6	-0.74	0.0379176	1.42	0.147066	1.23758	332.921	84.1	1.4	Down
M334T122	2.14812e+06	1.22653e+06	1.7592e+06	1.37323e+06	1.57751e+06	1.79307e+06	1.51645e+06	1.99404e+06	2.08783e+06	2.70594e+06	2.29834e+06	2.27081e+06	2.00148e+06	2.12442e+06	1.8897e+06	2.42172e+06	2.22503e+06	2.19762e+06	11.63	1.67352e+06	1.66835e+06	18.53	1.33	0.41	0.0029526	2.53	0.0288032	1.67556	334.054	121.9	2	Up
M334T375	825367	1.12796e+06	711185	714864	632071	824909	1.13643e+06	1.08963e+06	307868	94312.8	207673	885722	144578	485534	163505	244722	316739	226198	81.98	882801	825138	23.23	0.36	-1.48	0.0029526	2.53	0.0288032	1.82593	333.933	374.6	6.2	Down
M334T531	539276	354562	352072	677383	183346	53614.1	235770	431431	792077	758901	721994	446977	877966	390234	436785	871305	662030	740447	30.81	353432	353317	56.41	1.87	0.91	0.00699301	2.16	0.0487438	1.40838	334.111	530.7	8.8	Up
M334T564	9733.26	11521.9	14974	6029.89	10381.2	10610.1	11541.8	9050.59	40661.5	54522	21775.1	9761.87	18224.6	39316.5	34426.8	25279.7	30496	29853.3	47.32	10480.3	10495.6	24.15	2.91	1.54	0.0029526	2.53	0.0288032	1.77224	334.151	563.5	9.4	Up
M334T765	4.13507e+06	4.06072e+06	3.77622e+06	1.41794e+06	3.60491e+06	2.58258e+06	3.5581e+06	4.33383e+06	4.45073e+06	5.41214e+06	4.23226e+06	5.04717e+06	3.89997e+06	4.32495e+06	4.84768e+06	3.62086e+06	4.47947e+06	4.38784e+06	13.31	3.43367e+06	3.69057e+06	28.38	1.3	0.38	0.014763	1.83	0.078691	1.19185	334.205	764.6	12.7	Up
M334T84_2	586194	479929	310921	461712	458028	267270	489047	634485	515490	1.46063e+06	722744	446198	602969	1.36025e+06	1.30707e+06	860006	909420	791375	44.88	460948	470821	26.82	1.97	0.98	0.014763	1.83	0.078691	1.52915	333.927	83.8	1.4	Up
M335T380	112130	477417	32249.4	35878.8	28841.2	102835	38200.6	47364.1	54065	408150	224249	394244	264000	532224	369205	642254	361049	381724	50.65	109365	42782.4	139.21	3.3	1.72	0.0104118	1.98	0.0628046	1.52498	335.125	380.2	6.3	Up
M335T429	34957.3	25974.9	36668.5	176976	96727.1	20565.7	76636.3	28947.6	167933	513369	433706	27060	28983.7	134780	300241	489685	261970	234087	76.41	62181.7	35812.9	86.22	4.21	2.07	0.0498834	1.3	0.173853	1.34718	334.883	428.7	7.1	Up
M335T433	210955	78230.9	201148	255514	250731	58689.6	205103	176012	109779	8300.16	132959	199250	126209	10746.4	15976.7	15610.4	77353.9	62878	95.47	179548	203126	40.94	0.43	-1.21	0.014763	1.83	0.078691	1.27993	335.059	433	7.2	Down
M335T437	37759.4	200831	28507.9	32768.5	7202.83	2276.36	24945.4	29769.5	25385	4060.52	4335.56	6078.76	3137.98	665.397	2315.35	7065.03	6630.45	4198.04	118.27	45507.6	29138.7	140.57	0.15	-2.78	0.014763	1.83	0.078691	1.38575	335.072	437.2	7.3	Down
M335T514	51920.3	54146.2	60563.4	33700.5	65436	27745.1	75303.7	74493.1	68691.9	52123.4	80311	77232.7	92914.5	79624.9	77361.2	65580.8	74230.1	77297	16.33	55413.5	57354.8	31.53	1.34	0.42	0.014763	1.83	0.078691	1.32023	335.07	514.2	8.6	Up
M335T521	31751.7	29059.2	28634.6	27762.3	29883.7	30199.4	29397.5	28962.3	26777.8	20920.8	26090.8	26193.9	24381.2	25536.7	35501.5	24224.2	26203.3	25813.7	15.96	29456.3	29228.4	4.05	0.89	-0.17	0.0104118	1.98	0.0628046	1.20849	335.107	521.2	8.7	Down
M335T531	147428	81116.6	149405	161425	126774	124780	137782	164072	52705.2	48340.3	65361.1	92699.3	29982.4	19843.8	38580	21724.7	46154.6	43460.2	53.01	136598	142605	19.5	0.34	-1.57	0.0003108	3.51	0.00655521	1.90833	335.115	530.6	8.8	Down
M335T625	133971	37445	14802.4	258201	293053	101443	112340	25458.2	596437	718543	765602	26969.8	163971	506119	646944	857484	535259	621691	54.87	122089	106892	85.59	4.38	2.13	0.0104118	1.98	0.0628046	1.37289	335.186	625	10.4	Up
M335T670	776276	855986	597687	986335	545101	593859	726286	324163	1.04764e+06	783119	688003	969232	1.07807e+06	810792	671649	1.28611e+06	916827	890012	23.46	675712	661987	30.39	1.36	0.44	0.0498834	1.3	0.173853	1.16334	334.901	670.5	11.2	Up
M335T739	11332.7	45094.9	40940.8	54441.8	324161	24121.7	112165	104119	3.91018e+06	6.4637e+06	4.92997e+06	1.06135e+06	3.3927e+06	3.07162e+06	1.1165e+07	594721	4.32365e+06	3651438	77.65	89547	49768.3	113.05	48.28	5.59	0.0001554	3.81	0.00449411	2.11914	335.223	739.2	12.3	Up
M335T780	396425	95587.8	341858	37146.1	607715	78369.5	396896	274048	663818	841759	780608	446046	768377	596394	797566	369821	658049	716098	26.46	278506	307953	70.79	2.36	1.24	0.0029526	2.53	0.0288032	1.56754	335.286	779.6	13	Up
M335T812	1.48246e+07	4.31988e+07	2.61391e+07	5.4814e+07	2.85925e+07	3.9289e+07	6.07518e+07	6.95922e+07	8.52051e+07	2.82974e+08	3.31258e+07	4.54114e+07	9.48945e+07	1.64301e+08	2.69257e+08	8.42992e+07	1.32433e+08	9.00498e+07	73.2	4.21503e+07	4.12439e+07	44.44	3.14	1.65	0.0104118	1.98	0.0628046	1.42204	335.226	811.7	13.5	Up
M335T98_1	4.63628e+06	4.23394e+06	4.41003e+06	4.17404e+06	3.40151e+06	3.66735e+06	4.86591e+06	4.43082e+06	4.02661e+06	4.98734e+06	4.55321e+06	6.06237e+06	4.91145e+06	4.90995e+06	4.42451e+06	6.57317e+06	5.05608e+06	4.9107e+06	16.84	4.22749e+06	4.32199e+06	11.48	1.2	0.26	0.0281274	1.55	0.119973	1.31354	335.049	98.4	1.6	Up
M335T98_2	93154	85500.2	99680	263201	217518	185150	128700	115196	190669	815561	326359	186339	255083	158715	253569	164020	293789	222119	74.32	148512	121948	44.21	1.98	0.98	0.0379176	1.42	0.147066	1.28626	335.108	98	1.6	Up
M336T670	120796	83794.3	84862.5	92738.1	115437	47630.6	106316	95430.7	38225.7	41827.3	85884.2	78644.5	68745.7	52705.5	60632.1	90259.4	64615.6	64688.9	30.38	93375.6	94084.4	24.51	0.69	-0.53	0.0206682	1.68	0.0984557	1.15855	335.904	670.4	11.2	Down
M336T693	1.93185e+06	1.79289e+06	1.76151e+06	4.2473e+06	3.17787e+06	3.71563e+06	1.85515e+06	1.99987e+06	1.60838e+06	1.52489e+06	2.52855e+06	1.39738e+06	2.0368e+06	1.69876e+06	1.55232e+06	1.16995e+06	1.68963e+06	1.58035e+06	24.83	2.56026e+06	1.96586e+06	39.05	0.66	-0.6	0.0206682	1.68	0.0984557	1.30984	336.192	692.9	11.5	Down
M336T739	9931.23	236639	14006.4	234446	65182.2	5607.59	15982.6	13966.1	1.40323e+06	1.21959e+06	1.01225e+06	80946.8	214012	513684	2.50027e+06	257438	900176	762965	90.37	74470.1	14994.5	135.83	12.09	3.6	0.0018648	2.73	0.0213197	1.77869	336.226	739.2	12.3	Up
M336T792	4.71732e+06	1.35491e+07	2.75137e+06	3.39056e+06	742827	3.45965e+06	2.33901e+06	5.2286e+06	7.28163e+06	6.41894e+07	4.24063e+07	1.39149e+07	1.44794e+07	1.83011e+06	3.14646e+07	3.51956e+06	2.23857e+07	1.41972e+07	98.04	4.5223e+06	3.4251e+06	86.3	4.95	2.31	0.0281274	1.55	0.119973	1.3119	336.225	791.7	13.2	Up
M336T80	751316	2.57576e+06	929575	3.41757e+06	3.18415e+06	2.77713e+06	789546	2.96127e+06	4.62998e+06	1.13856e+07	5.76671e+06	1.75342e+06	5.51452e+06	1.01966e+06	5.90198e+06	9.09257e+06	5.63305e+06	5.64061e+06	60.95	2.17329e+06	2.67644e+06	52.75	2.59	1.37	0.0206682	1.68	0.0984557	1.23478	335.965	79.6	1.3	Up
M336T812	6.20085e+06	5.56801e+06	4.30625e+06	9.98069e+06	3.67138e+06	5.50982e+06	8.60709e+06	9.08766e+06	1.09044e+07	3.4984e+07	9.68781e+06	6.26397e+06	1.063e+07	2.21338e+07	3.63988e+07	2.56288e+07	1.95789e+07	1.65191e+07	60.86	6.61647e+06	5.88443e+06	35.17	2.96	1.57	0.0018648	2.73	0.0213197	1.61022	336.227	811.7	13.5	Up
M336T84	1.74981e+06	2.09236e+06	1.64913e+06	2.9788e+06	1.25661e+06	1.13071e+06	5.6482e+06	5.85937e+06	815701	332792	1.26446e+06	8.08521e+06	1.45624e+06	729664	489229	519705	1.71163e+06	772682	152.14	2.79562e+06	1.92109e+06	68.41	0.61	-0.71	0.0379176	1.42	0.147066	1.09225	335.911	84	1.4	Down
M337T108	277494	357127	370573	371538	369960	362070	357367	334090	325807	239788	316838	311395	261772	278558	265073	238070	279663	271816	12.37	350027	359718	9.06	0.8	-0.32	0.0018648	2.73	0.0213197	1.71034	337.081	108.2	1.8	Down
M337T122_2	2.17418e+06	2.23734e+06	2.13398e+06	2.10106e+06	2.01356e+06	2.30872e+06	2.33735e+06	1.86747e+06	2.11647e+06	2.318e+06	2.84285e+06	2.81891e+06	2.2319e+06	2.91154e+06	2.44747e+06	2.36341e+06	2.50632e+06	2405440	12.27	2.14671e+06	2.15408e+06	7.25	1.17	0.22	0.014763	1.83	0.078691	1.43062	337.071	121.8	2	Up
M337T31	37030.8	35684.9	57935.1	65987.3	58626.1	48743.5	78610.3	70241.3	59646.7	23875	42905.6	26957.3	11607.5	16947.8	24907.2	16373.5	27902.6	24391.1	57.11	56607.4	58280.6	27.09	0.49	-1.02	0.00699301	2.16	0.0487438	1.59241	336.795	31.1	0.5	Down
M337T801	1.94908e+07	4.66561e+07	1.97416e+07	1.06255e+07	6.7697e+06	8.88262e+06	1.18229e+07	1.17514e+07	2.37261e+06	795039	2.30333e+06	1.02173e+07	988518	903049	665916	933866	2.39745e+06	961192	134.78	1.69676e+07	1.17871e+07	75.83	0.14	-2.82	0.000621601	3.21	0.0104451	1.94986	337.238	800.8	13.3	Down
M338T148	5401.79	4364.56	2918	3417.97	6796.75	4435.47	9447.88	2540.41	7082.16	193446	8758.72	4747.54	6803.55	338647	199624	200799	119989	101102	107.88	4915.35	4400.02	46.6	24.41	4.61	0.004662	2.33	0.0380456	1.46657	338.087	148	2.5	Up
M338T311	35233.5	22995.9	36761.1	37512.8	44430.1	39665.5	21752.3	34584.6	49223.1	149859	111337	94733	52133	49636.9	46801.4	44690.5	74801.8	50885	52.65	34117	35997.3	23.07	2.19	1.13	0.0001554	3.81	0.00449411	1.64048	338.055	311.2	5.2	Up
M338T344	10897.4	116500	8511.82	168789	112281	11642.6	10351.2	1720.63	126539	89721.1	306629	142512	226567	113461	214844	182077	175294	162295	40.96	55086.8	11270	120.47	3.18	1.67	0.00699301	2.16	0.0487438	1.54981	337.919	344.3	5.7	Up
M338T345	11835.5	55581.7	13980.3	15422.2	12994.3	9120.73	11308	17110.8	100687	24412.8	17199.3	99899.1	21447.9	48536.4	55420.7	45360	51620.4	46948.2	63.99	18419.2	13487.3	82.62	2.8	1.49	0.004662	2.33	0.0380456	1.49064	337.881	344.7	5.7	Up
M338T363	33116.8	160549	35564.3	116512	64870.4	14360.1	34555.5	26002.3	140987	310607	258791	108442	205727	34576.9	195475	164691	177412	180083	48.65	60691.3	35059.9	84.77	2.92	1.55	0.00699301	2.16	0.0487438	1.5482	338.084	363.5	6.1	Up
M338T73	455763	905350	536807	957019	482918	1.10536e+06	559736	862940	1.12312e+06	3.70894e+06	1.73356e+06	2.05899e+06	1.44724e+06	2.65086e+06	558237	2.20629e+06	1.9359e+06	1.89627e+06	50.09	733237	711338	34.32	2.64	1.4	0.0029526	2.53	0.0288032	1.58133	338.067	73.2	1.2	Up
M338T836	780415	726170	717962	315485	649720	1.02385e+06	736180	570920	747974	1.20374e+06	1.13027e+06	1.2539e+06	1.05467e+06	864962	1.70188e+06	1.74282e+06	1.21253e+06	1.167e+06	29.42	690088	722066	28.98	1.76	0.81	0.0010878	2.96	0.0151734	1.58752	338.27	836.5	13.9	Up
M339T564_1	152253	92717.4	186146	263455	220649	373898	210236	256474	136156	57244.4	195996	247738	32047.5	136405	106156	48452.1	120024	121156	62.67	219479	215442	38.09	0.55	-0.87	0.0281274	1.55	0.119973	1.28861	338.971	564.2	9.4	Down
M339T744	15405.8	53295.3	12266.2	29790.8	10123.2	18587.5	14311.5	10601.7	348908	130497	202799	165784	179603	326232	247409	478506	259967	225104	44.95	20547.8	14858.6	71.32	12.65	3.66	0.0001554	3.81	0.00449411	2.15523	339.2	744.3	12.4	Up
M339T811	2.16557e+06	2.44219e+06	1.15721e+06	1.39895e+06	889983	1.20973e+06	2.44864e+06	2.5599e+06	3.12245e+06	8.50205e+06	3.88813e+06	2.11246e+06	2.56852e+06	2.24902e+06	8.06321e+06	6.5372e+06	4.63038e+06	3.50529e+06	57.43	1.78402e+06	1.78226e+06	38.44	2.6	1.38	0.00699301	2.16	0.0487438	1.61774	339.253	810.9	13.5	Up
M339T86	8.99151e+06	1.60931e+06	2.27843e+06	2.40935e+06	2.44827e+06	1.79281e+06	6.88904e+06	2.14631e+06	1.10573e+07	8.40967e+06	1.3647e+07	1.74657e+07	1.86035e+07	1.89727e+07	5.7687e+06	2.12933e+07	1.44022e+07	1.55564e+07	38.71	3.57063e+06	2.34389e+06	77.58	4.03	2.01	0.0010878	2.96	0.0151734	1.95244	338.995	85.5	1.4	Up
M340T417	306841	199532	235166	370395	292548	195984	99527.7	315535	28068.9	46285.5	15742.3	66181.9	15102.8	39803	72388	18433.2	37750.7	33935.9	59.65	251941	263857	34.25	0.15	-2.74	0.0001554	3.81	0.00449411	2.08799	340.116	417.4	7	Down
M340T475	59981	13926.8	44268.8	46222.8	26842.2	21434.3	149748	56774.8	174714	282872	71419.7	133956	256513	162418	188002	103752	171706	168566	41.77	52399.9	45245.8	81.45	3.28	1.71	0.0010878	2.96	0.0151734	1.81368	340.048	475	7.9	Up
M340T641	26556.9	37862.2	29707	29276.7	251603	22022.6	38302	62350.6	244626	294982	661942	336956	40113.3	262844	413357	28784.7	285451	278913	71.19	62210.2	33784.6	124.6	4.59	2.2	0.014763	1.83	0.078691	1.50651	340.122	641.5	10.7	Up
M340T708	148242	393497	194800	16362.6	232214	229783	231006	108545	13231.6	15833.4	120864	266207	12106.8	21597.5	72080.4	8140.04	66257.6	18715.4	135.78	194306	212292	56.67	0.34	-1.55	0.0281274	1.55	0.119973	1.37273	340.158	707.7	11.8	Down
M340T89	576531	2.98243e+06	684064	3.15029e+06	541364	2.46909e+06	524965	788926	4.59509e+06	1.19741e+07	7.57521e+06	811935	5.23289e+06	470830	6.4315e+06	5.2907e+06	5.29779e+06	5.26179e+06	69.52	1.46471e+06	736495	80.55	3.62	1.85	0.0281274	1.55	0.119973	1.23715	340.01	89.1	1.5	Up
M340T90	266429	260690	264429	262766	269188	231523	267985	269199	343996	482808	319378	308450	322120	385506	357274	412201	366467	350635	16.02	261526	265429	4.78	1.4	0.49	0.0001554	3.81	0.00449411	1.95254	340.088	89.8	1.5	Up
M340T93	159755	191240	145543	224404	191131	119142	160524	249407	147898	18583.6	167808	187683	124340	20764.9	20348	65890.3	94164.6	95115.3	75.43	180143	175827	23.66	0.52	-0.94	0.0281274	1.55	0.119973	1.308	340.13	93.1	1.6	Down
M341T111	104305	133302	134768	80095.8	229261	258977	126121	117292	58339.4	53871.9	95833.7	104468	73176.9	121281	104789	48418	82522.3	84505.3	33.38	148015	129712	42.15	0.56	-0.84	0.0104118	1.98	0.0628046	1.52016	341.146	111.4	1.9	Down
M341T293	831911	316910	627423	692785	794431	461116	570419	530959	132666	144413	122197	199184	118635	152478	196356	108169	146762	138539	23.5	603244	598921	28.43	0.24	-2.04	0.0001554	3.81	0.00449411	2.15341	341.095	292.7	4.9	Down
M341T301	30242.4	46609.3	25675.1	62083.7	39581	24389.3	48308.6	69241.1	62021.6	77256.1	66711.6	65661.5	72971.8	65550.6	57095.5	65539.8	66601.1	65606	9.3	43266.3	43095.1	38.22	1.54	0.62	0.0104118	1.98	0.0628046	1.61239	341.039	300.9	5	Up
M341T306_1	1.24193e+06	1.20008e+06	1.23864e+06	849846	1.12046e+06	871932	1.00556e+06	932085	1.13285e+06	1.13084e+06	2.12265e+06	1.87408e+06	1.51145e+06	1.2207e+06	1.08834e+06	2.04208e+06	1.51537e+06	1.36607e+06	28.85	1.05757e+06	1.06301e+06	15.46	1.43	0.52	0.0379176	1.42	0.147066	1.48708	341.073	306.4	5.1	Up
M341T306_2	1.89513e+07	1.48806e+07	2.10738e+07	1.35304e+07	1.48836e+07	1.13706e+07	2.06547e+07	1.54688e+07	2.34301e+07	1.36624e+07	2.56735e+07	2.89677e+07	2.2304e+07	2.30069e+07	1.97509e+07	2.38863e+07	2.25852e+07	23218502	19.84	1.63517e+07	1.51762e+07	21.37	1.38	0.47	0.0104118	1.98	0.0628046	1.51893	341.084	305.8	5.1	Up
M341T31	13641.1	243802	16163.2	11348.4	16834.2	9006.04	11829.8	16993.9	130087	123502	127580	16527.9	106166	95419.9	77890.9	114454	98953.4	110310	38.07	42452.3	14902.2	191.76	2.33	1.22	0.0206682	1.68	0.0984557	1.52755	340.794	30.9	0.5	Up
M341T321_2	7.44094e+06	6.94201e+06	6.93479e+06	8.9513e+06	5.95833e+06	6.25167e+06	7.27313e+06	5.79261e+06	7.71363e+06	6.55171e+06	1.02449e+07	1.37023e+07	7.97303e+06	1.20682e+07	9.39451e+06	8.4875e+06	9.51697e+06	8.94101e+06	25.14	6943099	6.9384e+06	14.57	1.37	0.45	0.0104118	1.98	0.0628046	1.46156	341.087	321.5	5.4	Up
M341T374	198846	337005	182685	243549	195314	87203.4	131865	175349	236666	288437	323119	204037	320103	196502	248949	262649	260058	255799	18.52	193977	188999	38.32	1.34	0.42	0.0379176	1.42	0.147066	1.22381	341.08	373.7	6.2	Up
M341T559	20665.4	76338.9	26486.1	35637.3	30786.5	29126.1	31315.7	31783.6	369942	1.03902e+06	73757.4	50747.5	242655	460044	759010	257073	406531	313508	83.93	35267.4	31051.1	48.68	11.53	3.53	0.000621601	3.21	0.0104451	1.8599	341.196	559.4	9.3	Up
M341T564	52477.4	75490.4	53192.5	34324.9	41782.3	53459.7	62985.1	39947.7	79712	72434	56561.3	72691.8	68779.9	75065.8	61161.7	78896.7	70662.9	72562.9	11.58	51707.5	52835	25.72	1.37	0.45	0.0104118	1.98	0.0628046	1.48649	340.969	564.2	9.4	Up
M341T72	1.14329e+07	9.74905e+06	9.20099e+06	9.96724e+06	9.16368e+06	1.12613e+07	1.35179e+07	1.15806e+07	1.09519e+07	1.24351e+07	1.3143e+07	1.23299e+07	1.26717e+07	1.51158e+07	1.49304e+07	1.19139e+07	1.29365e+07	1.25534e+07	11.1	1.07342e+07	1.06143e+07	13.91	1.21	0.27	0.014763	1.83	0.078691	1.48487	340.966	71.7	1.2	Up
M341T84_1	2.24977e+06	1.73774e+06	3.31659e+06	487256	1.88399e+06	1.53733e+06	4.02832e+06	1.90779e+06	4.40233e+06	4.75804e+06	4.27406e+06	8.21931e+06	4.1716e+06	4.1222e+06	4.04483e+06	4.77224e+06	4.84558e+06	4.3382e+06	28.7	2.1436e+06	1.89589e+06	50.91	2.26	1.18	0.0001554	3.81	0.00449411	1.70454	340.862	83.7	1.4	Up
M341T90	710938	343260	770087	1.02235e+06	1.31761e+06	657065	1.04619e+06	330820	473314	376179	127811	837325	133750	605529	154054	359085	383381	367632	65.72	774789	740513	44.47	0.49	-1.02	0.0498834	1.3	0.173853	1.34956	341.086	89.9	1.5	Down
M342T104_2	186565	148984	137378	152376	142795	147123	154502	100671	117778	13344.3	25266.9	36240.8	22476.8	113577	24473.6	174017	65896.9	30753.9	91.68	146299	148053	16.15	0.45	-1.15	0.014763	1.83	0.078691	1.58709	342.075	104.5	1.7	Down
M342T338	69459.3	139201	65290.3	119983	89992.8	30999.2	61641.4	47629.3	57973.2	24994.3	51832.3	44253.9	47292	27192.5	23162.3	54026.9	41340.9	45773	34.08	78024.5	67374.8	46.68	0.53	-0.92	0.0104118	1.98	0.0628046	1.32788	342.166	338.1	5.6	Down
M342T72	1.30302e+06	652600	757948	608436	427732	323047	690434	453234	119048	116220	527394	374836	61295.3	588670	119207	322336	278626	220772	73.51	652056	630518	46.24	0.43	-1.23	0.00699301	2.16	0.0487438	1.45027	341.97	71.7	1.2	Down
M342T797	621056	876125	585835	2.06731e+06	657219	1.115e+06	1.55462e+06	1.99529e+06	3.63853e+06	4.82074e+06	1.8898e+06	2.21117e+06	3.34659e+06	1.74043e+06	6.88583e+06	3.9497e+06	3.56035e+06	3.49256e+06	48.39	1.18406e+06	995564	51.74	3.01	1.59	0.0018648	2.73	0.0213197	1.7824	342.264	796.8	13.3	Up
M342T84	453801	432292	497721	476881	469926	453119	498324	498244	490047	791144	630172	530059	489633	855019	786609	959418	691513	708391	26.14	472538	473403	5.27	1.46	0.55	0.004662	2.33	0.0380456	1.63733	342.023	84.3	1.4	Up
M342T92	522523	231552	523438	308686	843272	462610	927146	804046	1.06424e+06	886360	1.14883e+06	1.10802e+06	891036	816413	812771	869519	949647	888698	14.25	577909	522981	44.13	1.64	0.72	0.00699301	2.16	0.0487438	1.58949	342.065	92	1.5	Up
M343T367	74979.9	93232.3	102389	109501	91543.6	14502.7	72731.7	94737.4	18840.5	32716.4	58630	49741	77023.6	15886.4	7884	38236.7	37369.8	35476.5	62.95	81702.2	92388	36.55	0.46	-1.13	0.014763	1.83	0.078691	1.18023	343.068	367	6.1	Down
M343T72	55732	64398.6	84717.7	67368.8	86387.2	92730	34634.7	72119.9	88857.8	274573	53947.8	243554	96974.7	83136.8	340511	374062	194452	170264	65.97	69761.1	69744.3	27.08	2.79	1.48	0.0281274	1.55	0.119973	1.3885	342.971	71.7	1.2	Up
M343T751	462470	584846	171506	345295	548537	407212	111712	567473	1.26606e+06	515838	876448	676522	1.07834e+06	806095	902913	331289	806687	841272	37.09	399881	434841	44.99	2.02	1.01	0.014763	1.83	0.078691	1.36285	343.212	751.1	12.5	Up
M343T759	212804	279214	195587	270036	94223.3	245675	271346	218749	671121	680191	241809	604347	851205	1.09456e+06	1.12576e+06	408197	709648	675656	43.42	223454	232212	27.11	3.18	1.67	0.0018648	2.73	0.0213197	1.8027	343.212	759	12.7	Up
M344T598	88803.9	70609.9	74835.1	76021	61446.1	52171.6	186078	276042	420626	1.00519e+06	245763	90198.3	98358.1	401904	196889	223472	335300	234618	88.5	110751	75428.1	71.13	3.03	1.6	0.00699301	2.16	0.0487438	1.43197	344.217	597.6	10	Up
M344T627	1.03807e+06	1.91909e+06	1.52356e+06	3.58751e+06	904915	1.43262e+06	1.56458e+06	2.10514e+06	358094	556978	308562	751404	696855	262941	271941	249345	432015	333328	47.6	1.75944e+06	1.54407e+06	47.74	0.25	-2.03	0.0001554	3.81	0.00449411	2.00873	344.152	627	10.4	Down
M344T662	46336.1	53282.6	50653.1	41068.1	63505.8	48980.2	67403.1	52370.8	147814	342327	139642	131107	114479	271636	306004	279604	216577	209725	42.46	52950	51512	16.38	4.09	2.03	0.0001554	3.81	0.00449411	2.09251	344.189	662.2	11	Up
M344T69	3.39278e+06	3.73605e+06	4.01855e+06	3.03768e+06	5.49922e+06	5.66199e+06	3.70012e+06	3.37117e+06	2.66736e+06	2.01214e+06	3.18167e+06	3.33309e+06	2.54944e+06	3.55578e+06	3.27002e+06	2.30412e+06	2.8592e+06	2.92451e+06	19.34	4.0522e+06	3.71809e+06	24.39	0.71	-0.5	0.004662	2.33	0.0380456	1.54733	344.027	68.7	1.1	Down
M344T71	380858	284546	380330	289931	313472	243534	341125	291007	791410	484960	962279	886793	958998	481366	448190	847269	732658	819340	30.51	315600	302239	15.4	2.32	1.22	0.0001554	3.81	0.00449411	2.03537	344.04	70.5	1.2	Up
M345T105	12214.2	13858.4	16505.4	61507.4	15881.3	15119.7	23598.9	17218.6	150422	96324	175961	189968	122083	124823	25265.7	140538	128173	132681	40	21988	16193.4	74.2	5.83	2.54	0.0003108	3.51	0.00655521	1.99306	345.141	105.3	1.8	Up
M345T269	87836.3	117482	124666	133866	111455	115130	124521	111112	141640	436378	116193	77813.7	137515	386432	417865	462050	271986	264036	61.3	115759	116306	11.8	2.35	1.23	0.0379176	1.42	0.147066	1.27528	345.079	269	4.5	Up
M345T627	75860.4	745465	386353	611346	158767	467884	104784	676814	239258	65696.1	88844.2	114469	81423.5	73880.5	76247.8	71027.6	101356	78835.7	56.95	403409	427119	65.97	0.25	-1.99	0.0104118	1.98	0.0628046	1.60453	345.156	627	10.4	Down
M345T630	7.4335e+06	8.1686e+06	5.60477e+06	1.305e+07	7.01045e+06	1.01145e+07	5.45795e+06	7.18724e+06	6.42096e+06	5.19811e+06	5.2451e+06	6.08567e+06	5.79594e+06	5.71182e+06	4.89156e+06	3.65994e+06	5.37614e+06	5.47846e+06	15.9	8.00338e+06	7.31037e+06	31.38	0.67	-0.57	0.0104118	1.98	0.0628046	1.55419	344.978	629.7	10.5	Down
M345T68	254705	105463	149577	323071	103659	106904	155671	111785	271174	733310	625873	101586	300974	351868	323739	857002	445691	337803	58.62	163854	130681	49.93	2.72	1.44	0.0206682	1.68	0.0984557	1.5516	345.031	68.5	1.1	Up
M345T768	140267	355259	308553	592056	373256	594613	263917	345655	2.35409e+06	1.62071e+07	4.36366e+06	638127	731084	46590	5.18433e+06	1.72119e+06	3.90578e+06	2.03764e+06	135.48	371697	350457	41.72	10.51	3.39	0.0104118	1.98	0.0628046	1.2492	345.137	768.2	12.8	Up
M345T82	3.88646e+06	8.80901e+06	5.02519e+06	9.5876e+06	6.5586e+06	1.11094e+07	1.52443e+07	1.43263e+07	4.86587e+06	1.32221e+06	2.57836e+06	1.94852e+07	3.0425e+06	2.0784e+06	3.40387e+06	1.0541e+06	4.72881e+06	2.81043e+06	128.66	9.31836e+06	9.1983e+06	44.3	0.51	-0.98	0.014763	1.83	0.078691	1.41253	344.729	82.5	1.4	Down
M346T120	2.72156e+08	2.47124e+08	2.55046e+08	2.72635e+08	2.45784e+08	1.7886e+08	2.90869e+08	2.83035e+08	1.86384e+08	2.60977e+07	2.42095e+08	2.67593e+08	1.69883e+08	1.32501e+08	1.17346e+08	7.87493e+07	1.52581e+08	1.51192e+08	53	2.55689e+08	2.63601e+08	13.72	0.6	-0.74	0.004662	2.33	0.0380456	1.26146	346.055	120.2	2	Down
M346T122	1.17287e+06	957674	1.56051e+06	1.70755e+06	1.93639e+06	1.5312e+06	949636	1.43189e+06	1.62735e+06	3.98862e+06	2.59146e+06	1.75803e+06	1.5657e+06	1.65172e+06	1.91033e+06	1.69846e+06	2.09896e+06	1.72824e+06	39.58	1.40596e+06	1.48154e+06	25.16	1.49	0.58	0.0206682	1.68	0.0984557	1.32233	346.081	122	2	Up
M346T342	229727	312517	223102	278939	190490	173537	323500	276311	296466	828849	251495	239093	348877	706487	552731	351337	446917	350107	49.83	251015	253019	22	1.78	0.83	0.0206682	1.68	0.0984557	1.33086	346.061	342.1	5.7	Up
M346T361	895417	726217	917812	874246	990862	858541	787946	959803	1.16918e+06	1.19848e+06	1.25991e+06	1.07928e+06	989912	1.20169e+06	1.31882e+06	1.14377e+06	1.17013e+06	1.18383e+06	8.75	876356	884832	9.91	1.34	0.42	0.0003108	3.51	0.00655521	2.00508	346.061	361.2	6	Up
M346T374	567052	532582	516292	1.22107e+06	607569	422954	688821	830221	1.09824e+06	1.55389e+06	1.39215e+06	1.19922e+06	1.18564e+06	1.02975e+06	1.04813e+06	1.24504e+06	1.21901e+06	1.19243e+06	14.67	673320	587311	37.56	1.81	0.86	0.0029526	2.53	0.0288032	1.91182	345.96	374.4	6.2	Up
M346T469	9207.81	1167.59	3229.28	4141.52	8780.5	2816.98	16016.1	10323.6	16819	43041.1	3512.46	13516.2	12905.1	24805	14207.3	63611.9	24052.3	15513.2	82.14	6960.42	6461.01	71.69	3.46	1.79	0.0104118	1.98	0.0628046	1.41781	346.132	468.8	7.8	Up
M346T697	100777	112202	344431	548286	124073	108430	131501	136399	401337	637864	423051	549833	420320	412683	375216	1.70378e+06	615510	421686	72.89	200762	127787	80.45	3.07	1.62	0.0029526	2.53	0.0288032	1.7623	346.147	697.4	11.6	Up
M347T103	115735	99736.8	494456	94544.4	109306	57631.6	113556	417110	488632	564770	771649	631714	637912	585689	135760	637576	556713	608702	33.79	187760	111431	89.32	2.97	1.57	0.0010878	2.96	0.0151734	1.72655	347.111	103.4	1.7	Up
M347T122	1.96123e+06	499502	1.4747e+06	84151.4	1.91153e+06	1.30151e+06	1.94084e+06	1.75728e+06	2.0915e+06	1.42986e+06	2.42918e+06	3.36906e+06	2.29058e+06	2.59507e+06	1.44965e+06	1.75828e+06	2.17665e+06	2.19104e+06	29.78	1.36634e+06	1.61599e+06	52.09	1.59	0.67	0.0498834	1.3	0.173853	1.03973	347.04	121.6	2	Up
M347T261	340722	176934	507434	242190	231759	237715	297469	373479	166038	102672	100325	472199	125085	206230	72759.4	112044	169669	118565	76.16	300963	269829	34.87	0.56	-0.83	0.0104118	1.98	0.0628046	1.42443	347.058	261.2	4.4	Down
M347T362	278736	195591	258873	182088	149023	240556	356550	261600	452221	315436	376542	468568	351985	237224	262701	275323	342500	333711	25.13	240377	249714	27.01	1.42	0.51	0.0281274	1.55	0.119973	1.40695	347.134	362.3	6	Up
M347T516	35134.1	45277.9	36372.9	52263.2	84714.2	76308.9	68859.2	94544.4	93483.4	85783.3	102935	121297	144526	38147.2	59354.7	109270	94349.8	98209.4	35.83	61684.3	60561.2	36.66	1.53	0.61	0.0379176	1.42	0.147066	1.13068	347.069	516	8.6	Up
M347T567	371081	863774	793598	696017	448468	330559	444522	304130	209552	136352	187389	183210	190305	177445	152527	209205	180748	185299	14.12	531519	446495	41.37	0.34	-1.56	0.0001554	3.81	0.00449411	2.01335	347.242	567.2	9.5	Down
M347T657	369957	535063	255442	520288	198099	109470	278833	251471	621957	321109	433676	347310	588653	535226	316989	663255	478522	484451	29.57	314828	267138	47.78	1.52	0.6	0.0281274	1.55	0.119973	1.2437	347.077	656.6	10.9	Up
M347T67	101733	104156	99747.6	122902	92737.3	96367.9	108224	123732	140117	152458	145365	137846	161856	133047	146416	154776	146485	145890	6.52	106200	102945	10.88	1.38	0.46	0.0001554	3.81	0.00449411	2.09802	346.529	66.8	1.1	Up
M347T760_2	1.38313e+06	1.00078e+06	960710	623906	959242	909738	1.37999e+06	1.01609e+06	713825	838121	744762	514442	847510	1.09346e+06	317712	803827	734207	774294	31.73	1.0292e+06	980743	24.29	0.71	-0.49	0.0281274	1.55	0.119973	1.20316	347.199	759.7	12.7	Down
M347T82	1.10905e+06	1.90413e+06	1.05932e+06	1.26201e+06	1.15698e+06	1.11153e+06	1.36936e+06	1.20063e+06	1.1064e+06	607190	1.33939e+06	1.26377e+06	914504	721312	520173	851684	915554	883094	32.78	1.27162e+06	1.1788e+06	21.54	0.72	-0.47	0.0498834	1.3	0.173853	1.3191	346.726	82.5	1.4	Down
M348T120	2.92825e+06	2.67574e+06	2.97708e+06	2.3932e+06	3.61108e+06	2.45079e+06	2.93025e+06	2.36273e+06	2.53386e+06	1.75779e+06	2.14944e+06	2.36778e+06	2.49873e+06	2.53898e+06	2.06013e+06	2.49167e+06	2.2998e+06	2.42972e+06	12.37	2.79114e+06	2.80199e+06	14.93	0.82	-0.28	0.0498834	1.3	0.173853	1.36192	348.059	120.2	2	Down
M348T314	58474.3	56884.1	34706.7	48891.5	100583	19416.4	53835.8	32351.3	109936	85057	142592	88257	82227.5	33872.9	176153	86025.7	100515	87141.4	42.8	50642.8	51363.7	48.2	1.98	0.99	0.0206682	1.68	0.0984557	1.47607	348.053	314	5.2	Up
M348T657	57977.7	58084.1	77031.1	60326.6	48158.6	36494.5	65138.3	61149.4	68467.7	57096.4	114366	71523.9	119367	146085	135221	166676	109850	116866	36.51	58045.1	59205.3	20.47	1.89	0.92	0.0104118	1.98	0.0628046	1.68932	348.08	656.6	10.9	Up
M348T89	385667	19103.8	101225	235655	70355.1	43853.6	106133	82453.2	664689	311353	102479	552891	107587	520259	335619	519558	389304	427588	53.82	130556	91839	93.12	2.98	1.58	0.00699301	2.16	0.0487438	1.48606	348.199	89.1	1.5	Up
M348T99_2	2.02392e+06	1.48231e+06	3.10767e+06	3.55553e+06	1.59231e+06	1.74002e+06	2.13449e+06	1.61387e+06	2.69217e+06	3.21382e+06	3.79446e+06	3.18246e+06	4.45134e+06	3.39097e+06	2.3412e+06	4.25574e+06	3.41527e+06	3.30239e+06	21.27	2.15627e+06	1.88197e+06	35.58	1.58	0.66	0.00699301	2.16	0.0487438	1.64517	348.061	98.6	1.6	Up
M349T497	197548	242302	160731	276603	146309	115055	159617	203542	131447	102236	112039	147453	161496	118817	130477	157064	132629	130962	16.11	187713	179139	28.29	0.71	-0.5	0.0281274	1.55	0.119973	1.35398	349.204	496.6	8.3	Down
M349T634	161031	214103	144558	141703	293895	167984	312330	249983	554378	638605	641381	273137	723540	526751	271163	767467	549553	596492	34.29	210698	191043	32.21	2.61	1.38	0.0018648	2.73	0.0213197	1.88488	349.202	633.6	10.6	Up
M349T664	355895	397602	426090	417683	214277	207416	204911	333081	671330	1.29366e+06	426025	442997	708691	753818	1.14235e+06	1.09817e+06	817130	731254	39.84	319619	344488	30.24	2.56	1.35	0.0003108	3.51	0.00655521	1.83165	349.202	664.5	11.1	Up
M349T758	2.42663e+06	2.21156e+06	3.0098e+06	2.23766e+06	3.24936e+06	2.59183e+06	2.82311e+06	2.14367e+06	1.8294e+06	1.11648e+06	2.02588e+06	1.84056e+06	1.81685e+06	2.53408e+06	1.63093e+06	1.46172e+06	1.78199e+06	1.82313e+06	23.24	2.5867e+06	2.50923e+06	15.73	0.69	-0.54	0.0018648	2.73	0.0213197	1.64876	349.202	758	12.6	Down
M349T811	1.44423e+07	1.61138e+07	1.94407e+07	8.82659e+06	1.00973e+07	4.12655e+06	2.22232e+07	1.73696e+07	7.31195e+06	431770	8.89631e+06	1.15425e+07	4.97888e+06	4.99515e+06	2.09148e+06	3.03836e+06	5.4108e+06	4.98701e+06	68.14	1.408e+07	1.52781e+07	42.67	0.38	-1.38	0.0104118	1.98	0.0628046	1.33259	349.204	811.5	13.5	Down
M349T99	824306	2.37004e+06	481540	1.59459e+06	618907	494695	1.17558e+06	641737	10458.7	7317.04	19624.5	10854.6	99144	323353	16301.8	6878.89	61741.6	13578.2	178.34	1.02517e+06	733021	64.75	0.06	-4.05	0.0001554	3.81	0.00449411	2.06101	349.065	98.7	1.6	Down
M350T326	10502	8202.79	8033.3	8983.37	13283.5	8702.17	10226.5	10792.9	14878.9	8237.95	14718.3	13301.1	21302.4	10667	9455.33	12698.9	13157.5	13000	30.95	9840.81	9604.91	17.74	1.34	0.42	0.0498834	1.3	0.173853	1.21027	350.051	326.3	5.4	Up
M350T363	455549	439454	360305	312056	176961	382651	363519	522260	134298	189213	187894	336482	180929	386318	145092	297944	232271	188553	40.7	376594	373085	27.65	0.62	-0.7	0.0281274	1.55	0.119973	1.41203	350.015	363.2	6.1	Down
M350T811	2.79654e+06	1.9955e+06	2.26026e+06	1.48841e+06	1.53237e+06	1.26511e+06	2.97228e+06	3.11587e+06	960571	67377.2	1.384e+06	1.96794e+06	1.90798e+06	772271	376161	500253	992070	866421	70.97	2.17829e+06	2.12788e+06	33.19	0.46	-1.13	0.00699301	2.16	0.0487438	1.3063	350.208	811.5	13.5	Down
M350T817	2.29874e+06	2.38078e+06	2.34557e+06	3.84374e+06	1.7542e+06	1.73006e+06	3.37063e+06	2.98023e+06	1.34818e+06	999130	1.18806e+06	1.50495e+06	3.80856e+06	781618	638583	1.06597e+06	1.41688e+06	1.12702e+06	71.04	2.58799e+06	2.36318e+06	29.06	0.55	-0.87	0.00699301	2.16	0.0487438	1.5046	350.269	817.4	13.6	Down
M351T251	1.34193e+06	2.93006e+06	1.76502e+06	716097	2.27655e+06	1.11148e+06	1.78217e+06	1.81505e+06	810171	137559	256200	2.42914e+06	1.6591e+06	1.14184e+06	135651	531516	887647	670843	92.27	1.71729e+06	1.7736e+06	40.04	0.52	-0.95	0.0498834	1.3	0.173853	1.311	351.034	251	4.2	Down
M351T326	644851	496638	569341	680364	348423	713134	754903	681473	447116	32286.3	472618	502412	831633	75440.9	54735.5	221738	329747	334427	85.49	611141	662608	21.94	0.54	-0.89	0.0379176	1.42	0.147066	1.25356	351.018	325.7	5.4	Down
M351T374_2	85185.7	8832.93	59870.5	134506	19615.4	15534.9	68538.4	36787.1	319713	196182	287441	20097.8	238816	120836	257076	184011	203022	217499	47.67	53608.8	48328.8	79.44	3.79	1.92	0.004662	2.33	0.0380456	1.57338	351.101	374.4	6.2	Up
M351T749	1.30743e+07	3.87132e+06	3.49008e+06	3.68456e+06	3.85501e+06	3.57341e+06	2.36609e+06	2.69084e+06	4.7325e+06	1.02194e+07	5.42109e+06	1.03179e+07	6.50385e+06	3.59793e+06	6.3266e+06	6.11418e+06	6.65419e+06	6.22039e+06	36.42	4.5757e+06	3628983	76	1.45	0.54	0.0281274	1.55	0.119973	1.1404	351.184	749	12.5	Up
M351T84	1.5055e+06	2.10899e+06	2.04857e+06	2.11106e+06	1.48603e+06	1.46534e+06	1.72952e+06	2.80222e+06	575748	198995	927497	2.84832e+06	799836	1.79133e+06	177899	951469	1.03389e+06	863667	86.34	1.90715e+06	1.88905e+06	24.02	0.54	-0.88	0.0379176	1.42	0.147066	1.35246	350.892	84	1.4	Down
M351T94_1	394906	321841	565585	476035	318483	375250	749424	570278	607121	817991	1.40812e+06	872026	816182	552226	889948	602514	820765	817087	33.14	471475	435470	31.75	1.74	0.8	0.0029526	2.53	0.0288032	1.7152	351.128	94.5	1.6	Up
M351T94_2	2.22539e+06	973507	2.46059e+06	1.62429e+06	2.28577e+06	842756	703959	1.18741e+06	3.65182e+06	1.83546e+06	1.73874e+06	2.97197e+06	2.4734e+06	2.32481e+06	860923	3.32882e+06	2.39824e+06	2.39911e+06	38.26	1.53796e+06	1.40585e+06	46.05	1.56	0.64	0.0498834	1.3	0.173853	1.09481	351.148	94.1	1.6	Up
M352T217	43960.7	173786	22157.4	200100	33387.8	145273	21057.1	160336	137586	982971	238770	36028.7	165258	529140	638230	669680	424708	383955	77.76	100007	94616.9	76.55	4.25	2.09	0.0281274	1.55	0.119973	1.308	352.063	217.4	3.6	Up
M352T373	64291.6	182899	98531	40016	101035	31958.5	147788	208947	14456.7	33852	8556.77	148903	18215.5	43405	35935.5	15317.6	39830.2	26033.8	114.86	109433	99783.2	59.64	0.36	-1.46	0.0206682	1.68	0.0984557	1.4746	352.142	373.1	6.2	Down
M352T528	1137.53	2619.26	8170.99	5776.15	4117.51	185.728	6943.57	28271.8	23998.3	52720.6	21718.8	14752.6	50661.5	42590.2	60633.7	15629.5	35338.1	33294.2	51.91	7152.82	4946.83	125.43	4.94	2.3	0.0018648	2.73	0.0213197	1.73511	352.152	528	8.8	Up
M352T71	358778	585571	427853	436059	391556	266647	383164	547471	1.26652e+06	1.37462e+06	1.29049e+06	1.53209e+06	1.11756e+06	1.98575e+06	1.80366e+06	1.3891e+06	1.46997e+06	1.38186e+06	19.83	424637	409704	24.09	3.46	1.79	0.0001554	3.81	0.00449411	2.20662	352.021	71.1	1.2	Up
M352T74	2.2798e+06	2.45728e+06	2.40624e+06	2.08301e+06	1.94631e+06	1.50818e+06	2.47499e+06	2.26909e+06	2.66454e+06	2.08418e+06	2.63435e+06	3.02997e+06	2.45562e+06	2.9744e+06	2.72912e+06	3.00575e+06	2.69724e+06	2.69683e+06	11.91	2.17811e+06	2.27445e+06	15.01	1.24	0.31	0.00699301	2.16	0.0487438	1.51138	351.973	73.9	1.2	Up
M352T768_1	2.63868e+06	2.48502e+06	1.42227e+06	2.1192e+06	371593	380341	1.60283e+06	1.07133e+06	2.68017e+06	4.691e+06	3.69312e+06	2.25768e+06	2.36149e+06	1.17118e+06	2.8519e+06	3.21497e+06	2.86519e+06	2.76603e+06	36.53	1.51141e+06	1.51255e+06	57.99	1.9	0.92	0.014763	1.83	0.078691	1.36357	351.648	768.2	12.8	Up
M352T768_2	532177	561972	376911	517584	464527	258121	696151	428239	684618	116404	309463	132595	309667	164602	117773	163379	249813	163990	77.13	479460	491055	27.35	0.52	-0.94	0.014763	1.83	0.078691	1.49949	352.15	768.3	12.8	Down
M353T309	360198	280689	349236	270848	441964	348792	410876	87619.7	256027	40585.7	51094.9	300756	114078	105235	149691	130497	143496	122287	64.01	318778	349014	34.44	0.45	-1.15	0.0104118	1.98	0.0628046	1.46663	353.121	308.7	5.1	Down
M353T369	17060.2	29860.8	17061.1	26426.7	21857.7	20660.3	24728.9	6506.36	17754	131850	39456.9	27422	35016.6	11673.3	30775.8	48193.3	42767.7	32896.2	88.41	20520.3	21259	35.04	2.08	1.06	0.0498834	1.3	0.173853	1.0243	353.073	369.1	6.2	Up
M353T634	3.00216e+06	2.4406e+06	2.69297e+06	2.96685e+06	2.3166e+06	2.5697e+06	2.65712e+06	2.58739e+06	1.80201e+06	979300	2.656e+06	2.85826e+06	1.95482e+06	1.75855e+06	1.38362e+06	1.27961e+06	1.83402e+06	1.78028e+06	35.62	2.65417e+06	2.62225e+06	8.91	0.69	-0.53	0.0206682	1.68	0.0984557	1.47391	353.233	634.1	10.6	Down
M353T734_2	5.39088e+06	7.33916e+06	8.54462e+06	6.11488e+06	5.42612e+06	3.81814e+06	6.59419e+06	5.35621e+06	8.05464e+06	1.0644e+07	6.87536e+06	6.06304e+06	8.7103e+06	6.54883e+06	7.9758e+06	1.16783e+07	8.31878e+06	8.01522e+06	23.76	6.07303e+06	5.7705e+06	23.67	1.37	0.45	0.0281274	1.55	0.119973	1.39998	353.233	733.6	12.2	Up
M354T102	7143.84	6929.02	10289.2	37857.1	43246.5	21590.1	37195	5108.4	114493	220094	133320	103439	37739.8	76235.7	138399	82966.9	113336	108966	47.79	21169.9	15939.7	75.72	5.35	2.42	0.000621601	3.21	0.0104451	1.88654	354.159	102.2	1.7	Up
M354T364_2	179660	189788	155756	255283	145335	136220	116662	157373	219803	237196	218638	169820	180550	218442	208330	214786	208446	216614	10.68	167010	156564	25.45	1.25	0.32	0.0281274	1.55	0.119973	1.32302	354.076	364.1	6.1	Up
M354T709	6.00863e+06	6.71676e+06	2.07227e+06	9.81683e+06	9.36632e+06	1.26181e+06	2.93214e+06	3.28667e+06	1.68439e+07	3.97717e+07	2.38904e+07	2.92202e+06	1.81823e+07	3.75074e+06	1.81106e+07	1.01722e+07	1.67055e+07	1.74773e+07	71.13	5.18268e+06	4.64765e+06	63.46	3.22	1.69	0.0206682	1.68	0.0984557	1.38071	354.236	708.5	11.8	Up
M354T723	31320.9	730743	111272	1.41185e+06	819199	496845	52271.2	685077	2.27978e+06	8.55541e+06	2.96549e+06	474013	2.35076e+06	1.82459e+06	3.91709e+06	4.05388e+06	3.30263e+06	2.65812e+06	73.09	542322	590961	87.54	6.09	2.61	0.0029526	2.53	0.0288032	1.59598	354.236	723.3	12.1	Up
M354T726	283014	176231	188527	196997	140177	40434.8	205051	258435	385708	218327	345360	314724	391457	211058	274744	436893	322284	330042	25.69	186108	192762	39.87	1.73	0.79	0.0029526	2.53	0.0288032	1.47274	354.138	726.1	12.1	Up
M355T329_1	1.28196e+06	2.64523e+06	1.37332e+06	1.43207e+06	2.89267e+06	1.17183e+06	1.4413e+06	930913	3.40328e+06	9.62202e+06	5.48108e+06	3.68709e+06	5.58304e+06	1.57126e+06	3.85046e+06	1.71517e+06	4.36417e+06	3.76877e+06	59.27	1.64616e+06	1.40269e+06	43.46	2.65	1.41	0.0018648	2.73	0.0213197	1.58169	355.075	329.4	5.5	Up
M355T356	99814.4	63620.8	121799	59694	93205.2	46349.2	108055	68882.2	126196	106786	108069	180150	89385.8	157324	70699	137929	122067	117133	29.41	82677.5	81043.7	32.26	1.48	0.56	0.0281274	1.55	0.119973	1.34156	355.097	356.4	5.9	Up
M355T624	589317	537153	424949	641945	623784	736575	534312	631213	618093	474040	421087	407011	462199	622259	432033	361057	474722	447116	20.25	589906	606550	15.72	0.8	-0.31	0.0281274	1.55	0.119973	1.36904	355.252	623.9	10.4	Down
M355T709	2.36783e+06	1.14591e+06	1.87401e+06	2.7906e+06	2.50087e+06	3.39352e+06	2.53222e+06	1.09501e+06	693650	793148	796664	1.26207e+06	1.65743e+06	1.451e+06	638856	1.46221e+06	1.09438e+06	1.02937e+06	37.12	2.2125e+06	2.43435e+06	35.99	0.49	-1.02	0.0104118	1.98	0.0628046	1.61185	355.238	708.6	11.8	Down
M355T86	2.70035e+06	2.25788e+06	1.56085e+07	1.33474e+07	1.40372e+07	9.0465e+06	1.26779e+07	1.23454e+07	1.12319e+07	1.17394e+07	1.79285e+07	1.48558e+07	1.69808e+07	1.57978e+07	1.60447e+07	1.88827e+07	1.54327e+07	1.59213e+07	17.77	1.02527e+07	1.25117e+07	50.18	1.51	0.59	0.0281274	1.55	0.119973	1.19779	354.964	85.5	1.4	Up
M356T320	485403	518691	329450	426756	479826	378284	531300	527209	347092	254398	420225	492703	394311	324475	354157	380607	370996	367382	18.92	459615	482614	16.22	0.81	-0.31	0.0498834	1.3	0.173853	1.18916	356.079	320	5.3	Down
M356T554	423805	368172	606126	117567	651913	414364	757987	450049	374022	199026	25429.1	179105	166173	222232	18837.2	254567	179924	189066	64.89	473748	436927	41.81	0.38	-1.4	0.00699301	2.16	0.0487438	1.41426	356.116	554.3	9.2	Down
M356T809	170854	87627.3	134522	182308	124776	127141	61424.8	57186.1	592852	639551	1.02145e+06	707832	684061	792566	693465	392251	690503	688763	25.75	118230	125958	39.35	5.84	2.55	0.0001554	3.81	0.00449411	2.1652	356.279	808.7	13.5	Up
M357T101	4.32392e+06	1.18268e+07	9.62015e+06	1.07069e+07	9.30413e+06	1.27152e+07	1.51986e+07	3.76472e+06	1.85262e+06	1.1604e+06	1.4976e+06	1.50907e+07	5.60051e+06	9.39693e+06	1.29278e+06	4.00183e+06	4.98667e+06	2.92722e+06	99.74	9.68254e+06	1.01635e+07	40.78	0.52	-0.96	0.0498834	1.3	0.173853	1.3546	357.096	100.7	1.7	Down
M357T167	1.33534e+07	2.72991e+07	1.56961e+07	2.32654e+07	2.32265e+07	3.02188e+07	1.67306e+07	2.8733e+07	415985	1.18317e+06	1.05059e+07	1.10198e+07	9.81412e+06	8.17768e+06	9.67771e+06	3.73125e+06	6.81571e+06	8.92769e+06	63.84	2.23154e+07	2.3246e+07	28.62	0.31	-1.71	0.0001554	3.81	0.00449411	1.57532	357.055	166.9	2.8	Down
M357T366	100630	68129.3	49962.7	35520	57360.1	42491.8	77738.4	70772.8	34629.3	16805.6	30918.6	102867	37255.4	58150	19426.7	33974.8	41753.4	34302.1	66.36	62825.6	62744.7	33.48	0.66	-0.59	0.0498834	1.3	0.173853	1.15957	357.082	366.1	6.1	Down
M357T466	62854.9	30385.9	61382	10317.2	23716.5	73232.3	54535.7	18576.9	106355	31998.6	70196.9	111475	101518	86546.1	51878.6	61591.3	77695	78371.5	36.66	41875.2	42460.8	56.83	1.86	0.89	0.0281274	1.55	0.119973	1.2665	357.106	465.6	7.8	Up
M357T491	36418	55259.7	63025.6	66493.9	48415	16113.5	60782.4	79022.3	93802.7	61461.2	87672.2	116072	121075	119203	75673	177842	106600	104937	33.73	53191.3	58021.1	36.8	2	1	0.0018648	2.73	0.0213197	1.6506	357.213	490.6	8.2	Up
M357T588	101481	108923	93740.9	49723.6	94749.2	81239.3	99733.8	45075.6	62704	56768.2	21605.6	73978	63588.9	22034.6	58982.4	64238.4	52987.5	60843.2	37.52	84333.3	94245	28.63	0.63	-0.67	0.0379176	1.42	0.147066	1.27555	357.12	588.3	9.8	Down
M357T650	465718	1.33829e+06	495715	1.28551e+06	1.05639e+06	164867	359395	280044	164013	77402.1	184237	449509	85236.3	6426.92	46426.7	151928	145647	118582	94.19	680741	480716	69.12	0.21	-2.22	0.0018648	2.73	0.0213197	1.52857	356.978	649.8	10.8	Down
M357T75	1.7018e+06	2.70689e+06	2.3856e+06	2.67586e+06	2.04756e+06	1.83952e+06	2.06803e+06	2.26939e+06	2.70199e+06	3.03348e+06	2.61956e+06	3.67852e+06	2.81005e+06	2.52896e+06	2.54955e+06	2.74427e+06	2.8333e+06	2.72313e+06	13.33	2.21183e+06	2.16871e+06	16.57	1.28	0.36	0.00699301	2.16	0.0487438	1.56717	357.069	74.7	1.2	Up
M357T76	1.43471e+07	1.56405e+07	1.99264e+07	2.84207e+07	1.74001e+07	1.33741e+07	1.8264e+07	1.98929e+07	3.50755e+07	2.52214e+07	3.04962e+07	2.03079e+07	2.99157e+07	2.12439e+07	2.26715e+07	3.43616e+07	2.74117e+07	2.75686e+07	21.3	1.84082e+07	1.78321e+07	25.59	1.49	0.57	0.0018648	2.73	0.0213197	1.66691	356.987	75.9	1.3	Up
M357T81	2.41282e+06	2.06986e+06	1.95127e+06	2.6353e+06	271914	831925	890568	740602	236926	284845	177001	208306	494028	125534	303747	244666	259382	240796	42.66	1.47553e+06	1.42092e+06	60.34	0.18	-2.51	0.0010878	2.96	0.0151734	1.86277	357.105	81	1.4	Down
M357T811	2.63856e+06	3.29774e+06	5.88808e+06	3.64563e+06	4.42102e+06	6.24149e+06	7.30495e+06	6.93645e+06	2.77353e+06	8.50994e+06	7.45716e+06	5.36204e+06	9.10555e+06	1.71239e+07	2.37205e+07	8.23001e+06	1.02853e+07	8.36998e+06	66.22	5.04674e+06	5.15455e+06	35.14	2.04	1.03	0.0281274	1.55	0.119973	1.17679	357.207	811.1	13.5	Up
M357T83	702245	894540	716880	539880	543869	565643	559760	508805	785559	854201	749825	609724	529136	1.22926e+06	975914	1.34631e+06	884991	819880	32.28	628953	562701	20.99	1.41	0.49	0.0498834	1.3	0.173853	1.21221	356.843	83.5	1.4	Up
M357T88	2.82772e+06	2.17005e+06	2.4424e+06	1.31539e+06	2.64891e+06	2.47598e+06	2.79235e+06	1.89932e+06	317781	1.1949e+06	2.38344e+06	2.52974e+06	1.61994e+06	1.00941e+06	1.3958e+06	2.23523e+06	1.58578e+06	1.50787e+06	48.14	2.32152e+06	2.45919e+06	22.07	0.68	-0.55	0.0498834	1.3	0.173853	1.04313	357.128	88.3	1.5	Down
M358T101	40883.3	192161	485926	235468	310739	168670	397709	706708	734223	555627	781310	750712	364824	357973	282893	406012	529197	480820	38.3	317283	273103	66.05	1.67	0.74	0.0498834	1.3	0.173853	1.17091	358.1	100.6	1.7	Up
M358T107	1.17559e+06	912006	1.00598e+06	1.1691e+06	903433	1.02861e+06	1.09128e+06	735531	898926	387434	633977	700889	578615	249674	292183	409855	518944	494235	42.93	1.00269e+06	1.0173e+06	14.87	0.52	-0.95	0.0003108	3.51	0.00655521	1.74444	358.079	106.9	1.8	Down
M358T111	18300.1	25602.7	22541.1	27366.9	21947	19968.1	26442.8	28660.7	37282.6	119346	39992.1	28536.2	40588.2	77392.7	102972	60755.7	63358.2	50671.9	52.9	23853.7	24071.9	15.57	2.66	1.41	0.0003108	3.51	0.00655521	1.77771	358.219	111.3	1.9	Up
M358T314	374362	366978	331443	399347	242160	345614	361114	389050	438637	722629	424691	346162	638101	364777	426422	496456	482234	432529	27.48	351258	364046	14.01	1.37	0.46	0.014763	1.83	0.078691	1.38131	358.082	314.1	5.2	Up
M358T65	185420	169985	150274	273607	103449	35657.3	191381	270779	309268	283979	315957	306734	276084	278677	243315	240372	281798	281328	10.2	172569	177702	46.15	1.63	0.71	0.0018648	2.73	0.0213197	1.44538	358.493	65.2	1.1	Up
M359T314	4303.37	14611.8	18027.7	25845.9	20769.9	12891	4801.5	20645.5	33522.6	45688	40198.4	30001.7	23739.5	12367.6	22166.9	35031	30339.5	31762.1	35.2	15237.1	16319.8	50.5	1.99	0.99	0.0104118	1.98	0.0628046	1.39004	359.086	314.1	5.2	Up
M359T533	84151.4	55761	86584.5	31087.5	46204.7	54501	106849	62015	84560.5	98922.8	82913	94566.2	97114.6	88388.9	92978.1	88040.3	90935.6	90683.5	6.43	65894.2	58888	37.55	1.38	0.46	0.0281274	1.55	0.119973	1.40823	359.086	532.6	8.9	Up
M359T709	1.15031e+06	1.85456e+06	1.0309e+06	761479	646347	655054	564393	1.15339e+06	3.21752e+06	1.6545e+06	1.33839e+06	908170	916187	2.3441e+06	1.44123e+06	1.64328e+06	1.68292e+06	1.54226e+06	45.81	977054	896191	43.49	1.72	0.78	0.0379176	1.42	0.147066	1.278	358.976	708.7	11.8	Up
M360T300	351170	296757	306481	407966	207497	143953	347444	355341	456271	466858	292282	270563	359553	559778	597281	588444	448879	461565	28.98	302076	326962	28.67	1.49	0.57	0.0498834	1.3	0.173853	1.32088	360.071	300.1	5	Up
M360T347	409099	736531	387531	293334	324208	259049	481047	479190	188822	13213	222440	301830	42684.4	157625	11127	38994.8	122092	100155	90.5	421249	398315	35.86	0.29	-1.79	0.000621601	3.21	0.0104451	1.62546	360.122	347.2	5.8	Down
M360T390	238453	287109	309720	412258	224520	454953	46370.1	492916	193935	216939	86075.6	159698	145265	94994.3	145069	135114	147136	145167	30.2	308287	298415	47.06	0.48	-1.07	0.0104118	1.98	0.0628046	1.20438	360.075	390.4	6.5	Down
M360T648	4240.43	20180	8952.83	28335.6	15912.6	9189.75	6097.35	7467.49	17459.1	22184.3	20088.8	33378.4	22500.5	18773.3	8576.51	29130.6	21511.5	21136.5	34.86	12547	9071.29	65.96	1.71	0.78	0.0498834	1.3	0.173853	1.22831	360.192	647.6	10.8	Up
M360T73	5.36647e+06	2.47175e+06	5.03324e+06	4.94817e+06	2.82494e+06	2.30771e+06	4.44066e+06	4.26468e+06	1.62614e+06	389693	158159	5.9727e+06	1.02682e+06	3.40049e+06	269465	1.90159e+06	1.84313e+06	1.32648e+06	107.78	3.9572e+06	4.35267e+06	31.19	0.47	-1.1	0.0281274	1.55	0.119973	1.41709	360.026	72.7	1.2	Down
M360T804	88894.3	55673.7	100867	77992.1	73384.8	297179	332193	24110.2	1.19106e+06	1.07273e+06	1.30992e+06	303312	1.04354e+06	1.4646e+06	313296	834610	941635	1.05814e+06	45.99	131287	83443.2	88.27	7.17	2.84	0.000621601	3.21	0.0104451	1.92044	360.253	803.7	13.4	Up
M361T107	501998	900232	1.18717e+06	593369	597437	912801	852413	538666	511059	502852	665399	507276	378267	604402	586841	414019	521264	509167	18.43	760511	724925	31.58	0.69	-0.54	0.0498834	1.3	0.173853	1.38817	361.135	107	1.8	Down
M361T300	165215	210118	131284	234442	157378	113408	147641	110629	78559.5	25551.9	53714.2	60944.7	62869.8	28279.1	42074.4	61860.5	51731.8	57329.4	35.52	158764	152510	27.83	0.33	-1.62	0.0001554	3.81	0.00449411	2.00822	361.072	300.2	5	Down
M361T378	3188.01	26188.8	35030.6	22204.6	4683.15	18562.7	6607.1	16008.4	92155.8	182512	101248	83302.6	43206.9	92046	159405	94356.3	106029	93256	41.74	16559.2	17285.6	68.05	6.4	2.68	0.0001554	3.81	0.00449411	1.93858	361.107	378.3	6.3	Up
M361T571	383.084	5423.18	7852.06	7278.48	1510.08	4163.66	341.988	4798.34	39878.6	55480.5	99151.3	3056.95	131538	19258.4	135464	25766.6	63699.3	47679.6	81.22	3968.86	4481	74.34	16.05	4	0.0029526	2.53	0.0288032	1.75493	361.199	571.2	9.5	Up
M361T598	808763	1.10533e+06	499834	599417	405868	455194	615169	592056	400577	62371.1	344720	535018	463338	39151.2	66199.2	39742.7	243890	205460	87.08	635204	595736	35.6	0.38	-1.38	0.0029526	2.53	0.0288032	1.51828	361.208	597.6	10	Down
M362T127	198531	406174	141516	370601	1.05092e+06	962707	67715.2	347297	625495	805175	723745	803417	636296	1.35081e+06	1.97875e+06	1.43647e+06	1.04502e+06	804296	46.89	443183	358949	82.99	2.36	1.24	0.0206682	1.68	0.0984557	1.39087	362.077	126.7	2.1	Up
M362T394	1.2107e+06	1.24905e+06	641038	604647	450972	577941	341859	1.77096e+06	2.12934e+06	1.83394e+06	2.3505e+06	1.80045e+06	2.41026e+06	1.26224e+06	801874	1.18976e+06	1.7223e+06	1.81719e+06	33.96	855896	622842	58.13	2.01	1.01	0.00699301	2.16	0.0487438	1.51156	362.029	393.7	6.6	Up
M362T69	81149.3	73225.3	91652.3	68328.9	70186.7	80115.8	97427.3	97411	136970	480146	203610	125621	225970	262639	334093	248624	252209	237297	45.24	82437.1	80632.6	14.32	3.06	1.61	0.0001554	3.81	0.00449411	2.00539	362.083	68.7	1.1	Up
M363T581	32373.4	17251.6	41517	45435.3	49408.2	30428	33276.8	31793.7	35440.7	66094.4	79720	55817.3	79221.4	33418.6	35143.9	79123.7	57997.5	60955.8	36.13	35185.5	32825.1	28.72	1.65	0.72	0.014763	1.83	0.078691	1.41877	363.179	580.7	9.7	Up
M363T586	170631	233792	148343	248438	137309	147153	141003	182053	113850	71975.7	147112	63249	53133.3	93101.9	85005	46880.1	84288.4	78490.4	39.76	176090	159487	24.45	0.48	-1.06	0.000621601	3.21	0.0104451	1.83629	363.015	586.1	9.8	Down
M363T68	174594	203097	292322	439475	210167	298496	215242	264731	286069	914164	599538	581073	699585	400795	402020	889446	596586	590305	38.54	262266	239986	32.14	2.27	1.19	0.0029526	2.53	0.0288032	1.78086	362.979	68.1	1.1	Up
M363T747	221728	218786	154460	434894	78776.6	67516.5	117400	98606.1	1.49634e+06	3.77011e+06	1.36945e+06	530298	1.0918e+06	2.08953e+06	2.38193e+06	1.71347e+06	1.80537e+06	1.6049e+06	54.2	174021	135930	69.38	10.37	3.37	0.0001554	3.81	0.00449411	2.10194	362.974	747.2	12.5	Up
M363T789	2.48759e+06	988545	1.31623e+06	1.93263e+06	1.06224e+06	877724	1.76356e+06	3.01683e+06	3.61333e+06	3.62413e+06	1.68317e+06	3.08472e+06	2.22304e+06	3.1326e+06	1.97665e+06	2.19373e+06	2.69142e+06	2.65388e+06	28.31	1.68067e+06	1.53989e+06	45.79	1.6	0.68	0.0206682	1.68	0.0984557	1.41313	363.22	788.9	13.1	Up
M364T101	832665	991018	1.23723e+06	788218	1.86853e+06	1.61894e+06	1.11445e+06	854300	587434	402122	733716	237636	652073	1.07452e+06	752730	461240	612683	619754	41.73	1.16317e+06	1.05273e+06	33.89	0.53	-0.92	0.0018648	2.73	0.0213197	1.59141	364.08	100.9	1.7	Down
M364T326	14813.2	14159	10667.7	54984.2	5294.85	5022.55	11455.5	5869.48	85429.6	45458.8	60314	85320.3	66111.6	79533.6	100845	50082.7	71636.9	72822.6	26.91	15283.3	11061.6	108	4.69	2.23	0.000621601	3.21	0.0104451	2.00283	364.107	326.4	5.4	Up
M364T356	75580.9	66806.9	84390.7	89697.4	89022.2	62229.2	77465.9	97688.3	75210.2	113894	111445	92470.3	88518.5	91626.5	105145	96497.9	96850.9	94484.1	13.27	80360.2	80928.3	15.04	1.21	0.27	0.0379176	1.42	0.147066	1.42554	364.071	355.9	5.9	Up
M364T404	86162.6	38761.4	54757.2	26565	69367.7	65627.9	100158	61481.7	15064.8	16820.6	11041.8	32839.7	34065.6	45470	8922.57	45503.7	26216.1	24830.2	57.49	62860.1	63554.8	37.79	0.42	-1.26	0.004662	2.33	0.0380456	1.60676	363.961	404	6.7	Down
M364T505	129932	19448.3	145551	24017.3	161458	97633.6	229140	115682	278361	201817	192321	226606	235403	288070	199845	185398	225977	214211	17.33	115358	122807	60.46	1.96	0.97	0.0029526	2.53	0.0288032	1.44977	364.084	504.6	8.4	Up
M364T75	7.78198e+06	3.26317e+06	6.86891e+06	4.24108e+06	1.00198e+07	6.20402e+06	1.20926e+07	9.63808e+06	4.37157e+06	2.02226e+06	5.33974e+06	5.30686e+06	4.85166e+06	3.86383e+06	3.94134e+06	3.01447e+06	4.08897e+06	4.15645e+06	28.05	7.51371e+06	7.32544e+06	39.84	0.54	-0.88	0.0206682	1.68	0.0984557	1.3517	364.082	74.9	1.2	Down
M364T94_1	1.11474e+07	1.07994e+07	9.18912e+06	6.38612e+06	1.75512e+07	7.40122e+06	9.63291e+06	1.32383e+07	8.3694e+06	4.04286e+06	5.49388e+06	1.0651e+07	5.34163e+06	9.57583e+06	7.5492e+06	2.88082e+06	6.73808e+06	6.52154e+06	40.58	1.06682e+07	1.02162e+07	32.95	0.63	-0.66	0.0281274	1.55	0.119973	1.31072	364.221	93.9	1.6	Down
M364T97	1.9234e+06	3.81904e+06	1.33422e+06	5.14177e+06	1.84022e+06	1.37831e+06	1.3549e+06	1.18086e+06	1.60809e+06	368889	1.65038e+06	864875	1.24537e+06	534433	471295	1.14253e+06	985734	1.00371e+06	51.22	2.24659e+06	1.60927e+06	64.38	0.44	-1.19	0.014763	1.83	0.078691	1.41097	364.055	97.4	1.6	Down
M365T108	259162	200998	283515	266738	226796	234194	232190	189749	198510	62072.6	160532	174654	196931	207144	203654	183207	173338	190069	27.49	236668	233192	13.55	0.73	-0.45	0.004662	2.33	0.0380456	1.22421	365.072	107.6	1.8	Down
M365T319	5174.4	4246	4392.65	4725.1	7541.68	4649.66	6624	6855.88	8595.74	7285.75	10206.5	7675.51	8340.02	6388.06	5487.44	8040.59	7752.45	7858.05	18.49	5526.17	4949.75	23.19	1.4	0.49	0.00699301	2.16	0.0487438	1.60747	365.07	319.1	5.3	Up
M365T505	46894.5	48066.3	25250.3	53744.7	36163.5	34183.1	33708.9	36421.6	17985.6	9266.7	31696.2	20370.9	35506.7	32535.5	23381.3	30881.9	25203.1	27131.6	35.71	39304.1	36292.6	23.87	0.64	-0.64	0.004662	2.33	0.0380456	1.35645	365.089	504.6	8.4	Down
M365T558	415066	330301	386017	294986	289761	281784	394683	498436	161495	113820	150499	279998	151642	188449	86094.1	157833	161229	154738	35.52	361379	358159	20.98	0.45	-1.16	0.0001554	3.81	0.00449411	1.94179	365.196	557.9	9.3	Down
M365T799	6.05351e+06	2.59119e+06	6.96608e+06	5.45486e+06	3.84175e+06	2.80045e+06	4.67977e+06	3.09024e+06	9.41247e+06	4.24409e+06	8.75699e+06	4.19202e+06	8.89805e+06	8.9947e+06	3.60674e+06	8.21069e+06	7.03947e+06	8.48384e+06	35.99	4.43473e+06	4.26076e+06	36.52	1.59	0.67	0.0498834	1.3	0.173853	1.28387	365.245	799	13.3	Up
M365T93_1	198027	237842	160797	212732	130831	72870.8	183776	261088	260173	496694	215158	224145	279819	164717	287452	495193	302919	269996	41.41	182245	190901	33.15	1.66	0.73	0.0206682	1.68	0.0984557	1.35621	365.051	93	1.6	Up
M366T244	53256.3	111716	52020.9	118158	134660	90873.2	120766	135412	137273	143319	147223	162627	84330.7	133450	120295	134368	132861	135820	17.39	102108	114937	32.88	1.3	0.38	0.0498834	1.3	0.173853	1.07312	366.053	244.3	4.1	Up
M366T335	994973	1.87919e+06	702263	323691	309819	532648	836476	1.08602e+06	143137	26550.9	44789.5	758626	61154.8	423398	18872.5	44607	190142	52972.2	139.83	833135	769370	61.29	0.23	-2.13	0.004662	2.33	0.0380456	1.74635	366.013	334.9	5.6	Down
M366T429	12793.1	19094.1	12617.3	22414	17670.2	2057.26	13173.9	10199.9	27729.4	78146.5	83253.2	24361.2	36989.6	21467.2	44367.2	13720.2	41254.3	32359.5	63.28	13752.5	12983.5	45.23	3	1.58	0.0018648	2.73	0.0213197	1.57359	366.132	428.9	7.1	Up
M366T75_2	7.11634e+08	8.45777e+08	5.98483e+08	1.38264e+09	6.14934e+08	5.50386e+08	3.42769e+08	7.85353e+08	3.17851e+07	2.63367e+08	2.3618e+08	1.9089e+08	3.34107e+07	6.95753e+08	1.98034e+08	1.1839e+08	2.20976e+08	1.94462e+08	95.29	7.28998e+08	6.63284e+08	41.98	0.3	-1.72	0.0018648	2.73	0.0213197	1.67509	366.036	75	1.2	Down
M366T799	1.09e+06	952252	1.064e+06	950263	448037	907908	408054	940519	1.19262e+06	1.1094e+06	1.00134e+06	1.33328e+06	998619	1.44301e+06	1.12539e+06	1.02578e+06	1.15368e+06	1.1174e+06	14.05	845129	945391	31.37	1.37	0.45	0.004662	2.33	0.0380456	1.22814	366.249	799	13.3	Up
M367T289	53238.4	33360.5	154290	26267.1	42576.5	31466.7	239342	176414	207727	423310	167355	225689	306038	165939	120977	212009	228630	209868	41.79	94619.4	47907.5	87.54	2.42	1.27	0.0206682	1.68	0.0984557	1.62541	367.029	288.8	4.8	Up
M367T384	108733	132094	116255	117243	129326	155070	78779.3	117695	90462.1	85259.5	110122	89891	68780.7	109134	100261	60736.1	89330.8	90176.5	19.85	119400	117469	18.22	0.75	-0.42	0.0104118	1.98	0.0628046	1.48046	367.037	384.4	6.4	Down
M367T626	1.32167e+06	2.00716e+06	1.59422e+06	1.78892e+06	1.31067e+06	890144	1.4812e+06	1.55811e+06	1.07624e+06	1.0488e+06	1.53089e+06	1.52832e+06	1.11802e+06	420202	593751	700006	1.00203e+06	1.06252e+06	40.87	1.49401e+06	1.51966e+06	22.52	0.67	-0.58	0.0281274	1.55	0.119973	1.22607	367.212	626.3	10.4	Down
M367T66_2	14402.8	14496	15136.4	18813.6	12914.4	17671.8	11232.6	13653.7	16308.2	60818.2	37433.9	23768.6	24632	45460.9	43041.8	50850.4	37789.2	40237.8	40.24	14790.2	14449.4	16.62	2.56	1.35	0.000621601	3.21	0.0104451	1.86048	367.065	65.6	1.1	Up
M367T775	1.67991e+06	2.50544e+06	1.62785e+06	2.80391e+06	2.31344e+06	1.60138e+06	1.58039e+06	1.09657e+06	926810	46896.8	1.16515e+06	877744	428724	90967	64547.7	115927	464595	272326	98.71	1.90111e+06	1.65388e+06	30.24	0.24	-2.03	0.0003108	3.51	0.00655521	1.70992	367.19	775.2	12.9	Down
M368T326	111059	126754	110748	133362	169874	33586.9	81833.9	83064.9	68860.1	3021.79	96284.4	109490	73504.6	21193.7	5631.79	20989	49871.9	45026.9	84.52	106285	110903	38.4	0.47	-1.09	0.0104118	1.98	0.0628046	1.21575	368.014	326.5	5.4	Down
M368T397	141615	48017.5	171867	182072	35048.4	37225.9	140800	101803	519252	269376	399671	323138	596552	419911	425241	348370	412689	409791	25.62	107306	121301	56.5	3.85	1.94	0.0001554	3.81	0.00449411	2.00336	368.12	396.7	6.6	Up
M368T414	9744.78	19462.5	8725.34	35548.7	23765.5	6681.12	10553.7	15048.8	34289	48033.4	18464.9	15200.1	44267.4	16410.8	45066.4	43320.2	33131.5	38804.6	42.84	16191.3	12801.2	60.13	2.05	1.03	0.0206682	1.68	0.0984557	1.41792	368.091	414.1	6.9	Up
M368T673	53393.6	20829.4	20062.5	10045.3	7298.76	9387.16	9231.91	7193.58	148475	68591.4	261333	97651.7	67008.4	86266.5	112780	109544	118956	103598	53.19	17180.3	9716.21	90.85	6.92	2.79	0.0001554	3.81	0.00449411	2.07729	368.153	672.8	11.2	Up
M369T124	61654.8	61545.9	358132	207103	191527	217989	297957	181229	240416	850819	525141	391982	571076	415456	367265	884235	530799	470298	43.47	197142	199315	52.03	2.69	1.43	0.000621601	3.21	0.0104451	1.69013	369.097	123.6	2.1	Up
M369T351	76097.9	116092	90250	96553	100077	39357.2	71750.1	47447.8	99920.9	212502	184826	159221	172255	110525	72925.6	118566	141343	138894	33.92	79703.1	83173.9	33.12	1.77	0.83	0.0104118	1.98	0.0628046	1.512	369.133	350.6	5.8	Up
M369T374	370495	236320	413102	330097	755914	145697	869278	465416	261422	137612	371039	124119	215852	114748	141377	212605	197347	176991	44.4	448290	391798	55.28	0.44	-1.18	0.0104118	1.98	0.0628046	1.33286	369.075	373.7	6.2	Down
M369T580	664508	576052	407074	328403	686946	543214	618455	372469	697325	880302	588249	512934	662405	899966	943171	1.03872e+06	777884	788814	24.14	524640	559633	26.29	1.48	0.57	0.0206682	1.68	0.0984557	1.41665	369.228	579.7	9.7	Up
M369T650	229629	664846	221573	301988	263240	34961.4	280924	64398.7	129538	68734.3	156503	65203.7	100667	3348.48	22287.8	39406.7	73211.2	66969	72.21	257695	246434	74.41	0.28	-1.82	0.0281274	1.55	0.119973	1.23071	369.275	649.9	10.8	Down
[truncated: 1,866 more rows]
