# Supplementary material for: The impact of dapagliflozin for the myocardial metabolomic profiles of mice with chronic heart failure induced by a high fat diet
Source: Research Square preprint supplement (doi:10.21203/rs.3.rs-6881055/v1), 2025-06-25
Supplement: Supplementary file 2 [file 1b8939a409f389160623a73e.xlsx]

## Sheet: DEM_AnalysiList
Accession	DAPA_Mean	DAPA_Median	DAPA_RSD	HDF_Mean	HDF_Median	HDF_RSD	FC	log2FC	P.value	-log10(P.value)	FDR	VIP	Mass-to-charge ratio	Retention indices	Retention times(min)
M100T108	69856.1	59758.6	35.45	91781.4	73937.8	80.73	0.76	-0.39	0.878477	0.06	0.966491	0.0312541	100.012	107.6	1.8
M101T108	6.03447e+06	6.52992e+06	49.94	6.3322e+06	7.17444e+06	39.53	0.95	-0.07	0.95913	0.02	0.990213	0.262476	101.024	107.6	1.8
M101T37	171500	164978	19.03	180465	176878	18.56	0.95	-0.07	0.645377	0.19	0.878479	0.456052	100.954	36.9	0.6
M101T387	109548	109186	47.91	118059	111228	24.23	0.93	-0.11	0.798446	0.1	0.939353	0.565849	101.061	386.6	6.4
M101T57	310064	314415	17.23	333258	335432	17.15	0.93	-0.1	0.645377	0.19	0.878479	0.471534	100.954	56.8	0.9
M101T98	1.14598e+07	8.90501e+06	43.1	1.11645e+07	9.47275e+06	38.36	1.03	0.04	0.95913	0.02	0.990213	0.101007	101.024	97.5	1.6
M102T31	466455	416567	74.36	510671	573238	51.97	0.91	-0.13	0.645377	0.19	0.878479	0.344311	101.934	31.1	0.5
M102T38	139178	127783	18.24	173925	157904	39.75	0.8	-0.32	0.645377	0.19	0.878479	0.808519	101.952	37.8	0.6
M102T51	287188	285692	10.87	339007	342447	18.79	0.85	-0.24	0.194872	0.71	0.545008	1.308	101.952	51.1	0.9
M102T80	3.11945e+07	3.02329e+07	6.34	3.10148e+07	2.9752e+07	8.07	1.01	0.01	0.441803	0.35	0.767913	0.132819	102.056	80.5	1.3
M102T90	1.08741e+06	962604	43.12	2.78512e+06	2.43337e+06	62.07	0.39	-1.36	0.014763	1.83	0.158002	1.67113	102.02	90.3	1.5
M102T91	784149	860868	51.83	1.146e+06	1.12234e+06	26.67	0.68	-0.55	0.104895	0.98	0.407489	1.42096	102.056	91.5	1.5
M103T122	8.4551e+06	8.86804e+06	28.26	9.43102e+06	9.06681e+06	12.67	0.9	-0.16	0.505361	0.3	0.806745	0.797259	103.04	121.7	2
M103T286	1.63876e+06	1.37979e+06	54.87	1.6845e+06	1.19742e+06	103.85	0.97	-0.04	0.720901	0.14	0.912068	0.783776	103.004	285.8	4.8
M103T303	1.12802e+06	1.1287e+06	8.47	1.01505e+06	977731	28.92	1.11	0.15	0.0104118	1.98	0.130233	1.14601	103.004	303.1	5.1
M103T52	1.15831e+07	1.11869e+07	17.23	1.23965e+07	1.23557e+07	9.49	0.93	-0.1	0.194872	0.71	0.545008	0.84844	102.949	52.4	0.9
M103T54	2.97115e+06	3.21096e+06	34.96	3.63938e+06	3.86619e+06	16.93	0.82	-0.29	0.160528	0.79	0.499935	1.07657	102.933	53.7	0.9
M103T69	401529	376926	63.11	580287	655418	40.1	0.69	-0.53	0.194872	0.71	0.545008	1.05333	102.934	69	1.1
M103T80	2.04235e+06	1.82366e+06	31.59	1.32135e+06	1.28385e+06	32.6	1.55	0.63	0.0206682	1.68	0.184282	1.79717	103.059	80.4	1.3
M103T83	5.84607e+07	5.90668e+07	18.96	7.63431e+07	7.37624e+07	17.7	0.77	-0.39	0.0104118	1.98	0.130233	1.86989	102.957	83.3	1.4
M103T92	2.02382e+07	1.97906e+07	31.55	9.03188e+07	6.39219e+07	104.35	0.22	-2.16	0.0829837	1.08	0.365948	1.05574	103.04	92.2	1.5
M103T93	2.40827e+06	2.41236e+06	4.61	2.12259e+06	2.1571e+06	13.49	1.13	0.18	0.0498834	1.3	0.285686	1.68689	103.004	92.7	1.5
M104T83	651267	627943	11.55	704158	697705	7.11	0.92	-0.11	0.104895	0.98	0.407489	1.23486	103.96	83.3	1.4
M104T85	3.05036e+07	3.65461e+07	54.96	3.09746e+07	3.24772e+07	53.77	0.98	-0.02	0.878477	0.06	0.966491	0.178718	104.035	84.6	1.4
M105T74	1.3492e+06	1.22535e+06	42.88	2.03269e+06	1.43763e+06	67.32	0.66	-0.59	0.798446	0.1	0.939353	0.822757	105.019	74.2	1.2
M105T82	4.61993e+07	4.89776e+07	34.38	4.22091e+07	4.10451e+07	52.22	1.09	0.13	0.382284	0.42	0.724699	0.318056	105.019	81.7	1.4
M105T83	2.16392e+07	2.17154e+07	18.62	1.91099e+07	1.70674e+07	30.01	1.13	0.18	0.278632	0.55	0.636272	0.733135	104.954	83.3	1.4
M105T92	515906	416377	87.04	454101	504825	67.74	1.14	0.18	0.878477	0.06	0.966491	0.0571114	105.044	92.2	1.5
M106T434	850418	799536	45	516642	425028	95.78	1.65	0.72	0.130381	0.88	0.452467	1.44326	106.04	433.9	7.2
M106T455	1.54018e+06	1.31098e+06	66.26	587890	557868	36.34	2.62	1.39	0.000621601	3.21	0.0444681	2.09221	106.04	454.7	7.6
M106T482	2.0123e+06	1.88556e+06	40.72	2.09576e+06	1.84297e+06	56.21	0.96	-0.06	0.878477	0.06	0.966491	0.209183	106.04	482	8
M106T82	1.02307e+06	1.01572e+06	22.38	1.23184e+06	1.15269e+06	28.7	0.83	-0.27	0.234499	0.63	0.594903	1.11858	106.023	81.8	1.4
M107T472	189401	198442	25.24	178037	170845	27.78	1.06	0.09	0.798446	0.1	0.939353	0.368539	107.05	471.6	7.9
M107T88	2.21868e+06	2.04933e+06	20.35	1.85427e+06	1.88663e+06	21.56	1.2	0.26	0.234499	0.63	0.594903	1.20231	106.981	88.3	1.5
M108T122	8.85641e+06	8.71872e+06	60.71	8.92808e+06	6.97151e+06	66.91	0.99	-0.01	0.645377	0.19	0.878479	0.0219993	108.02	121.7	2
M108T251	162797	148771	28.75	214956	214126	21.16	0.76	-0.4	0.0206682	1.68	0.184282	1.73804	108.02	250.5	4.2
M108T336	151391	125320	48.99	111535	90109.6	100.8	1.36	0.44	0.278632	0.55	0.636272	1.16159	108.046	335.7	5.6
M108T456	202647	175701	48.23	323652	278405	56.8	0.63	-0.68	0.194872	0.71	0.545008	1.3219	108.046	456.3	7.6
M108T87	4.26683e+06	3.98014e+06	35.91	4.93851e+06	3.50419e+06	72.66	0.86	-0.21	0.798446	0.1	0.939353	0.0727184	108.013	86.7	1.4
M108T94	1.60814e+06	1.49663e+06	15.1	618990	590434	88.12	2.6	1.38	0.0001554	3.81	0.0365579	1.7782	108.057	93.5	1.6
M109T122	1.47549e+06	1.4007e+06	13.78	1.78558e+06	1.66844e+06	25.61	0.83	-0.28	0.0498834	1.3	0.285686	1.2471	109.041	121.7	2
M109T147	41470.9	38359.7	27.02	348865	363711	47.41	0.12	-3.07	0.0104118	1.98	0.130233	2.29436	109.041	146.7	2.4
M109T480	2.06759e+06	1.97444e+06	86.93	2.46907e+06	2.2735e+06	88.75	0.84	-0.26	0.645377	0.19	0.878479	0.286028	109.04	479.7	8
M109T83	2.06255e+07	2.09277e+07	6.18	2.46046e+07	2.37759e+07	17.38	0.84	-0.25	0.0281274	1.55	0.216677	1.63557	108.902	82.6	1.4
M109T87	4.10665e+06	4.05258e+06	22.52	2.9969e+06	3.16333e+06	60.64	1.37	0.45	0.234499	0.63	0.594903	1.19214	109.041	87	1.4
M110T123	1.06353e+06	1.08093e+06	8.94	1.08085e+06	1.08279e+06	9.05	0.98	-0.02	0.798446	0.1	0.939353	0.0991394	110.025	123.2	2.1
M110T94	1.47063e+06	1.48313e+06	7.89	1.51009e+06	1.51849e+06	6.57	0.97	-0.04	0.878477	0.06	0.966491	0.54627	110.072	93.6	1.6
M111T108	1.94007e+06	1.27767e+06	75.09	1.00857e+06	800629	67.68	1.92	0.94	0.104895	0.98	0.407489	1.23021	111.009	107.6	1.8
M111T122	9.3917e+07	9.49524e+07	31.14	6.82199e+07	5.99957e+07	26.67	1.38	0.46	0.104895	0.98	0.407489	1.41952	111.02	121.9	2
M111T393	3.62949e+06	4.20297e+06	48.94	2.64447e+06	2.71444e+06	63.77	1.37	0.46	0.234499	0.63	0.594903	0.659786	111.045	393.5	6.6
M111T70	3.49688e+06	3.72621e+06	34.22	3.94075e+06	3.77849e+06	39.31	0.89	-0.17	0.720901	0.14	0.912068	0.316311	111.009	70.3	1.2
M111T79	1.45386e+07	1.37143e+07	18.34	1.47207e+07	1.43792e+07	13.36	0.99	-0.02	0.720901	0.14	0.912068	0.184823	110.985	79	1.3
M111T83	1.4606e+07	9.66384e+06	72.28	1.79944e+07	1.50333e+07	55.16	0.81	-0.3	0.328205	0.48	0.683277	0.609487	110.899	82.6	1.4
M111T97_1	407950	219089	102.92	276395	73229.1	149.21	1.48	0.56	0.234499	0.63	0.594903	1.24176	110.958	97.3	1.6
M111T97_2	1.6804e+07	1.62112e+07	12.51	6.56086e+06	4.68658e+06	89.6	2.56	1.36	0.004662	2.33	0.0886941	1.87494	111.02	96.6	1.6
M112T110	423300	405402	45.47	586472	611857	48.58	0.72	-0.47	0.130381	0.88	0.452467	0.3651	112.004	110.1	1.8
M112T121_1	1.23445e+06	1.34373e+06	50.77	1.43537e+06	1.45312e+06	33.35	0.86	-0.22	0.505361	0.3	0.806745	0.638938	112.04	121.5	2
M112T121_2	3.04485e+07	2.98615e+07	11.5	3.16589e+07	31228020	28.75	0.96	-0.06	1	0	1	0.0739436	112.052	120.8	2
M112T122	4.72611e+06	4.85647e+06	11.72	4.85057e+06	4.56315e+06	19.8	0.97	-0.04	1	0	1	0.21685	112.023	121.9	2
M112T136	1.19257e+06	1.17201e+06	16.12	1.2245e+06	1.35037e+06	34.18	0.97	-0.04	0.441803	0.35	0.767913	0.222598	112.023	136.1	2.3
M112T717	4.06167e+06	3.84029e+06	36.58	4.14787e+06	3.99466e+06	20.54	0.98	-0.03	0.573737	0.24	0.844385	0.175496	112.051	717.4	12
M112T759	4.67111e+06	4.44396e+06	61.99	4.51657e+06	4.9483e+06	59.48	1.03	0.05	1	0	1	0.0216965	112.052	758.5	12.6
M112T770	3.39756e+06	3.62319e+06	41.55	6.19461e+06	5.81564e+06	46.65	0.55	-0.87	0.0281274	1.55	0.216677	1.5125	112.051	770.3	12.8
M112T802	5.12665e+06	4.07285e+06	67.7	1.60478e+06	1.34353e+06	66.01	3.19	1.68	0.0018648	2.73	0.0601903	2.00254	112.052	801.9	13.4
M112T819	1.11794e+07	1.18616e+07	53.44	1.35316e+07	1.05773e+07	80.99	0.83	-0.28	0.95913	0.02	0.990213	0.106319	112.052	819.1	13.7
M112T95	1.51656e+07	1.48255e+07	43.51	1.74356e+07	1.96131e+07	48.22	0.87	-0.2	0.645377	0.19	0.878479	0.384801	112.052	94.8	1.6
M113T117	9.83799e+07	1.0231e+08	22.94	1.02549e+08	1.07376e+08	19.11	0.96	-0.06	0.720901	0.14	0.912068	0.308613	112.986	117	2
M113T120	655690	348743	106.39	1.13965e+06	777546	115.29	0.58	-0.8	0.505361	0.3	0.806745	0.564903	113.055	120.4	2
M113T121	2.01654e+06	2.02904e+06	10.85	1.83075e+06	1.75924e+06	18.24	1.1	0.14	0.160528	0.79	0.499935	0.972188	113.024	120.9	2
M113T374	1.61062e+08	1.60488e+08	40.53	7.07994e+07	7.53817e+07	33.6	2.27	1.19	0.0104118	1.98	0.130233	1.85833	112.986	373.8	6.2
M113T696	1.33835e+08	1.42497e+08	23.82	1.25091e+08	1.32933e+08	46.8	1.07	0.1	0.720901	0.14	0.912068	0.597938	112.984	695.7	11.6
M113T719	2.45334e+08	2.30281e+08	33.67	3.35857e+08	2.99621e+08	31.61	0.73	-0.45	0.0829837	1.08	0.365948	1.35212	112.985	718.6	12
M113T732	2.99788e+08	2.23579e+08	62.79	2.85958e+08	2.71977e+08	65.14	1.05	0.07	0.95913	0.02	0.990213	0.465254	112.984	732.4	12.2
M113T765	2.81969e+08	2.00935e+08	74.94	2.11932e+08	1.05499e+08	96.62	1.33	0.41	0.278632	0.55	0.636272	1.03118	112.985	764.9	12.7
M113T780	1.27446e+08	8.80741e+07	87.53	1.57589e+08	1.57057e+08	53.07	0.81	-0.31	0.505361	0.3	0.806745	0.807734	112.985	779.8	13
M113T810	1.08442e+09	1.09655e+09	36.39	1.28794e+09	1.19487e+09	37.09	0.84	-0.25	0.573737	0.24	0.844385	0.664616	112.986	809.6	13.5
M113T83	2.27112e+06	2.13618e+06	15.48	2.79844e+06	2.92468e+06	18.53	0.81	-0.3	0.0379176	1.42	0.250052	1.5735	112.896	82.6	1.4
M113T84	2.76934e+08	3.02056e+08	25.1	4.07341e+08	4.13271e+08	53.92	0.68	-0.56	0.0829837	1.08	0.365948	1.08398	112.986	84.1	1.4
M113T85	3.04736e+06	3.24815e+06	14.1	1.02778e+06	870347	108.09	2.96	1.57	0.000621601	3.21	0.0444681	1.76378	113.036	85.2	1.4
M113T90	7.91269e+06	8.12404e+06	20.2	8.21686e+06	8.19574e+06	31.85	0.96	-0.05	1	0	1	0.0401855	113.024	90.2	1.5
M113T98	1.31307e+07	1.24282e+07	15.03	1.34528e+07	1.27433e+07	17.12	0.98	-0.03	0.878477	0.06	0.966491	0.266998	112.986	98.3	1.6
M114T117	2.1801e+06	1.56659e+06	51.72	2096067	2.28284e+06	43.94	1.04	0.06	0.798446	0.1	0.939353	0.233302	113.989	117	2
M114T122	1.16937e+06	1.05439e+06	84.52	2.9721e+06	2.20262e+06	110.09	0.39	-1.35	0.441803	0.35	0.767913	0.499985	114.056	121.6	2
M114T709	1.55253e+06	1.61198e+06	29.12	1.1341e+06	1.25854e+06	29.05	1.37	0.45	0.0281274	1.55	0.216677	1.33995	113.989	708.9	11.8
M114T718	3.59815e+06	3.40092e+06	17.02	3.44734e+06	3.42608e+06	17.94	1.04	0.06	0.573737	0.24	0.844385	0.373258	113.989	718.2	12
M114T742	4.61721e+06	4.79291e+06	31.46	4.90248e+06	5.33065e+06	20.11	0.94	-0.09	0.505361	0.3	0.806745	0.411031	113.989	742.2	12.4
M114T767	6.06482e+06	6.73963e+06	51.87	5.2981e+06	4.60036e+06	57.46	1.14	0.19	0.441803	0.35	0.767913	0.234528	113.989	767.2	12.8
M114T80	2.57216e+06	2.1996e+06	55.8	3.78292e+06	2.55935e+06	68.33	0.68	-0.56	0.278632	0.55	0.636272	0.934347	114.02	80.3	1.3
M114T84	4.39992e+06	4.70248e+06	31.18	5.2285e+06	5.70975e+06	33.95	0.84	-0.25	0.328205	0.48	0.683277	0.67166	113.989	84.1	1.4
M114T91	332630	326880	15.95	407083	419344	34.79	0.82	-0.29	0.0281274	1.55	0.216677	0.398589	114.02	90.9	1.5
M114T94	535630	533580	14.67	761994	791031	16.41	0.7	-0.51	0.004662	2.33	0.0886941	2.19853	114.031	94.5	1.6
M114T96	1.38079e+07	1.41728e+07	17.31	9.39449e+06	9.33244e+06	16.71	1.47	0.56	0.004662	2.33	0.0886941	2.13139	114.056	96.3	1.6
M114T98	2.31317e+06	2.26684e+06	30.71	2.92855e+06	2.44336e+06	50.74	0.79	-0.34	0.573737	0.24	0.844385	0.814132	114.02	98.2	1.6
M115T111_1	2.47201e+06	2.43549e+06	28.76	4.79001e+06	4.97465e+06	62.82	0.52	-0.95	0.0829837	1.08	0.365948	0.669242	115.004	110.8	1.8
M115T111_2	3.70991e+06	3.91283e+06	25.1	3.45842e+06	3.26152e+06	15.52	1.07	0.1	0.194872	0.71	0.545008	0.20723	115.04	111.4	1.9
M115T117	383459	391789	11.18	337996	328578	11.78	1.13	0.18	0.0498834	1.3	0.285686	1.48908	114.99	117.4	2
M115T126	669944	658920	16.13	721599	721999	3.86	0.93	-0.11	0.278632	0.55	0.636272	1.02212	115.004	125.8	2.1
M115T31	517961	479858	20.88	465946	461442	14.31	1.11	0.15	0.328205	0.48	0.683277	0.792803	114.934	31.1	0.5
M115T84	1.72084e+06	1.67613e+06	16	1.32023e+06	1.29914e+06	26.59	1.3	0.38	0.0379176	1.42	0.250052	1.7392	114.99	84	1.4
M115T91	933034	874870	22.41	1.19221e+06	1.19114e+06	48.59	0.78	-0.35	0.878477	0.06	0.966491	0.430838	114.989	90.6	1.5
M116T108	7.04503e+07	6.85736e+07	10.77	6.52367e+07	6.57808e+07	9.7	1.08	0.11	0.234499	0.63	0.594903	1.12609	116.072	108	1.8
M116T157	5.60105e+06	5.51966e+06	28.13	3.95648e+06	3.85955e+06	27.27	1.42	0.5	0.0206682	1.68	0.184282	1.69926	116.071	156.9	2.6
M116T206	2.53564e+06	2.21838e+06	50.57	3.03353e+06	3.03083e+06	43.88	0.84	-0.26	0.441803	0.35	0.767913	0.707638	116.071	205.7	3.4
M116T287	1.85669e+06	2.12333e+06	39.09	2.41739e+06	2.18593e+06	31.97	0.77	-0.38	0.441803	0.35	0.767913	1.05968	116.071	286.7	4.8
M116T31	962128	936494	9.27	938061	944350	5.91	1.03	0.04	0.645377	0.19	0.878479	0.36997	115.921	31.1	0.5
M116T324	1.38275e+06	1.42868e+06	13.83	1.41484e+06	1.25451e+06	26.67	0.98	-0.03	0.878477	0.06	0.966491	0.0329221	116.073	324.5	5.4
M116T363	86485.9	64249.2	82.08	503306	472627	85.46	0.17	-2.54	0.0829837	1.08	0.365948	1.62937	116.051	363	6
M116T532	1.27834e+06	1.30577e+06	35.62	1.24936e+06	1.1789e+06	36.58	1.02	0.03	0.95913	0.02	0.990213	0.0175056	116.073	532.3	8.9
M116T549	4.27929e+06	4.35998e+06	22.46	4.57352e+06	4.55443e+06	30.42	0.94	-0.1	0.505361	0.3	0.806745	0.0754005	116.073	548.9	9.1
M116T565	3.57821e+06	3.50121e+06	23.68	4.01775e+06	4.05497e+06	16.7	0.89	-0.17	0.194872	0.71	0.545008	0.742473	116.071	565.5	9.4
M116T590	2.31845e+06	2.2868e+06	26.92	2.507e+06	2.47973e+06	20.6	0.92	-0.11	0.328205	0.48	0.683277	0.550319	116.073	589.8	9.8
M116T660	2.97849e+06	3.31594e+06	31	3.02987e+06	3.23728e+06	21.79	0.98	-0.02	0.95913	0.02	0.990213	0.188918	116.073	660.3	11
M116T675	967530	946384	26.87	1.11582e+06	1.13877e+06	28.05	0.87	-0.21	0.328205	0.48	0.683277	0.664789	116.071	675.3	11.3
M116T696	1.90384e+06	2.03972e+06	30.69	3.3515e+06	3.1748e+06	50.13	0.57	-0.82	0.160528	0.79	0.499935	1.26796	116.071	696.5	11.6
M116T732	2.09021e+06	2.04725e+06	28.15	1.94082e+06	1.90841e+06	30.47	1.08	0.11	0.645377	0.19	0.878479	0.485163	116.071	732	12.2
M116T751	4.27787e+06	4.10297e+06	35.77	4.66182e+06	5.17987e+06	51.86	0.92	-0.12	0.878477	0.06	0.966491	0.132312	116.073	751	12.5
M116T766	4.75305e+06	5.00271e+06	37.22	3.81183e+06	3.55666e+06	34.49	1.25	0.32	0.194872	0.71	0.545008	0.576396	116.072	766.4	12.8
M116T91	4.92078e+06	5.08753e+06	20.78	4.79968e+06	4.66646e+06	24.73	1.03	0.04	0.573737	0.24	0.844385	0.121533	116.035	90.6	1.5
M116T99	2.90882e+06	2.57595e+06	43.71	3.94032e+06	3.73608e+06	31.35	0.74	-0.44	0.0498834	1.3	0.285686	1.33247	116.035	99.2	1.7
M117T107	1.40725e+06	1.36179e+06	25.98	2.63045e+06	2.40116e+06	57.81	0.53	-0.9	0.104895	0.98	0.407489	1.35751	117.019	107.3	1.8
M117T122	1.01757e+07	1.20249e+07	70.14	1.2135e+07	1.36516e+07	81.15	0.84	-0.25	0.798446	0.1	0.939353	0.361323	117.056	121.6	2
M117T309	131026	104379	83.77	493405	475835	39.03	0.27	-1.91	0.0003108	3.51	0.040447	2.07809	116.907	309.4	5.2
M117T74_1	1.30019e+07	1.35056e+07	16.56	1.40541e+07	1.2535e+07	35.47	0.93	-0.11	0.878477	0.06	0.966491	0.290174	116.983	74.2	1.2
M117T74_2	1.22882e+06	1.10141e+06	55.15	1.56185e+06	1.75277e+06	43.62	0.79	-0.35	0.798446	0.1	0.939353	0.769861	117.008	74.4	1.2
M117T77	7.1192e+06	5.66121e+06	94.26	1.11894e+07	9.12365e+06	54.2	0.64	-0.65	0.0281274	1.55	0.216677	1.41346	117.019	76.5	1.3
M117T92	3.54648e+06	3.59766e+06	7.73	3.76366e+06	3.69626e+06	8.79	0.94	-0.09	0.505361	0.3	0.806745	0.9916	117.019	91.5	1.5
M118T118	420580	390220	33.37	459542	481923	41.64	0.92	-0.13	0.95913	0.02	0.990213	0.11966	118.059	117.9	2
M118T31	771829	816531	13.14	849626	839921	21.37	0.91	-0.14	0.382284	0.42	0.724699	0.77319	117.928	31.1	0.5
M118T374	189358	201527	27.35	153511	172984	32.58	1.23	0.3	0.0829837	1.08	0.365948	1.00854	118.066	374.1	6.2
M118T557	111963	11834.3	245.78	382468	218279	128.14	0.29	-1.77	0.0379176	1.42	0.250052	1.69584	118.03	557.2	9.3
M118T88	8.59645e+07	8.24185e+07	21.25	6.92812e+07	6.8554e+07	30.48	1.24	0.31	0.130381	0.88	0.452467	1.22076	118.051	87.8	1.5
M119T148	33420.4	30564.8	24.96	29718.8	29229.8	14.01	1.12	0.17	0.505361	0.3	0.806745	0.710106	119.05	147.7	2.5
M119T220	6.29472e+06	5.66341e+06	62.77	1.0053e+07	8.97943e+06	83.96	0.63	-0.68	0.382284	0.42	0.724699	0.810185	119.037	219.9	3.7
M119T309	503183	532856	19.97	419477	420689	46.17	1.2	0.26	0.441803	0.35	0.767913	0.916907	118.904	309.3	5.2
M119T31_1	60456.7	60046.9	5.41	52822.8	53262.2	11.56	1.14	0.19	0.00699301	2.16	0.1064	1.88894	118.9	30.8	0.5
M119T31_2	200987	199626	40.47	95671.3	44663.9	86.86	2.1	1.07	0.0206682	1.68	0.184282	1.71341	118.927	31.1	0.5
M119T74	2.71154e+06	2.65736e+06	26.52	2.92881e+06	2.90344e+06	23.86	0.93	-0.11	0.441803	0.35	0.767913	0.559604	118.999	74.2	1.2
M119T83	7.12405e+06	6.31563e+06	34.42	7.20117e+06	6.82559e+06	50.58	0.99	-0.02	0.878477	0.06	0.966491	0.126456	118.931	83.4	1.4
M119T88	2.75653e+06	2.54305e+06	25.23	3.01014e+06	2.73903e+06	33.27	0.92	-0.13	0.573737	0.24	0.844385	0.2227	119.054	87.8	1.5
M119T90	1.99934e+07	1.86555e+07	35.81	1.24263e+07	9.17022e+06	51	1.61	0.69	0.0649573	1.19	0.325531	1.45663	119.035	90.2	1.5
M120T104	256625	239476	27.25	266368	271031	20.61	0.96	-0.05	0.645377	0.19	0.878479	0.259306	120.013	104.3	1.7
M121T108	1.18191e+06	1.16973e+06	6.95	1.22551e+06	1.21494e+06	8.76	0.96	-0.05	0.441803	0.35	0.767913	0.587333	121.03	107.5	1.8
M121T257	1.76581e+07	1.72924e+07	10.76	1.55095e+07	1.61802e+07	26.15	1.14	0.19	0.278632	0.55	0.636272	1.08997	121.029	257	4.3
M121T286	153157	133594	45.97	121470	131117	53.18	1.26	0.33	0.573737	0.24	0.844385	0.884724	121.041	285.6	4.8
M121T456	329749	190700	99.27	542248	573428	49.01	0.61	-0.72	0.0829837	1.08	0.365948	1.30209	121.041	455.8	7.6
M121T494	1.44556e+07	1.69789e+07	33.06	4.00953e+07	1.69748e+07	111.2	0.36	-1.47	0.720901	0.14	0.912068	0.788808	121.029	493.6	8.2
M121T83	2.75704e+06	2.58662e+06	19.76	2.66872e+06	2.79124e+06	13.35	1.03	0.05	0.720901	0.14	0.912068	0.336228	120.928	83.4	1.4
M122T257	228622	230405	61.24	538237	481816	49.74	0.42	-1.24	0.014763	1.83	0.158002	1.7135	122.034	257.3	4.3
M122T433	282423	99129.9	117.63	494722	633415	63.64	0.57	-0.81	0.104895	0.98	0.407489	1.31527	122.036	433.5	7.2
M122T454	536877	507544	32.22	875049	798902	61.58	0.61	-0.7	0.278632	0.55	0.636272	0.931529	122.036	454.5	7.6
M122T494	937168	854220	34.35	1.14375e+06	1.12038e+06	26.57	0.82	-0.29	0.130381	0.88	0.452467	0.824119	122.034	493.6	8.2
M123T113	100274	75941.6	101.49	222390	223916	34.38	0.45	-1.15	0.0281274	1.55	0.216677	1.6185	123.02	112.7	1.9
M123T374	333450	345746	29.82	359070	354223	31.1	0.93	-0.11	0.720901	0.14	0.912068	0.416063	122.976	374.4	6.2
M123T81	1.67467e+07	1.58818e+07	23.38	1.60794e+07	1.48494e+07	20.01	1.04	0.06	0.798446	0.1	0.939353	0.343007	122.976	81.3	1.4
M123T91	2.25109e+06	2.25679e+06	39.23	3.2882e+06	2.77165e+06	36.17	0.68	-0.55	0.0829837	1.08	0.365948	1.31829	122.976	90.6	1.5
M124T108	3.77962e+07	2.95019e+07	76.25	5.65294e+07	3.51737e+07	103.91	0.67	-0.58	0.645377	0.19	0.878479	0.555854	124.007	107.6	1.8
M124T116	624575	714444	60.13	1.25812e+06	1.16832e+06	23.11	0.5	-1.01	0.0018648	2.73	0.0601903	1.64548	123.902	115.8	1.9
M124T363	1.00624e+06	1.00659e+06	7.38	1.11494e+06	1.11607e+06	21.29	0.9	-0.15	0.441803	0.35	0.767913	0.720794	124.006	363.1	6.1
M124T53	4.59386e+06	4.42206e+06	16.81	5.03333e+06	4.91606e+06	19.93	0.91	-0.13	0.441803	0.35	0.767913	0.801451	123.902	52.5	0.9
M124T68	2.9883e+06	2.54507e+06	63.57	1.32546e+06	733920	76.36	2.25	1.17	0.0206682	1.68	0.184282	1.61226	124.007	68.2	1.1
M124T74	1.00691e+07	9.8404e+06	20.53	8.16352e+06	7.92592e+06	44.15	1.23	0.3	0.234499	0.63	0.594903	0.841546	124.007	74.5	1.2
M124T86_1	2.06699e+09	2.0542e+09	5.02	2.20607e+09	2.05848e+09	16.45	0.94	-0.09	1	0	1	0.631034	124.008	86.1	1.4
M124T86_2	1.05259e+06	1.06378e+06	12.15	1.11075e+06	1.10205e+06	5.59	0.95	-0.08	0.328205	0.48	0.683277	0.837355	124.044	86.2	1.4
M125T104	4.39932e+06	3.48304e+06	65.37	3.56124e+06	2.71739e+06	61.14	1.24	0.3	0.573737	0.24	0.844385	0.485649	125.018	104.4	1.7
M125T114	226596	238392	17.08	78386	58609.8	105.76	2.89	1.53	0.000621601	3.21	0.0444681	1.80731	124.992	113.9	1.9
M125T192	879409	839830	34.6	625411	568252	40.12	1.41	0.49	0.104895	0.98	0.407489	1.25302	125.036	191.6	3.2
M125T256	338121	328547	21.62	315043	331179	13.66	1.07	0.1	0.573737	0.24	0.844385	0.435093	125.097	256.4	4.3
M125T281	147334	126327	46.98	226141	221677	22.06	0.65	-0.62	0.0206682	1.68	0.184282	1.64086	125.047	281.5	4.7
M125T329	2.02371e+06	1.21191e+06	82.73	1.10522e+06	803176	64.55	1.83	0.87	0.194872	0.71	0.545008	1.05538	125.036	329.3	5.5
M125T374	203018	216181	48.51	225026	215693	34.36	0.9	-0.15	0.878477	0.06	0.966491	0.431509	125.016	374.2	6.2
M125T499	99448.4	91818.8	26.4	108417	100382	46.05	0.92	-0.12	0.878477	0.06	0.966491	0.068533	125.097	498.9	8.3
M125T70	1.06129e+06	957032	48.79	1.1504e+06	1.06596e+06	53.86	0.92	-0.12	0.95913	0.02	0.990213	0.044958	125.025	70.5	1.2
M125T85	856750	897116	28.73	697816	711147	31.99	1.23	0.3	0.194872	0.71	0.545008	0.944683	124.991	84.6	1.4
M125T86	5.36337e+07	5.08133e+07	24.21	5.48816e+07	5.59519e+07	24.64	0.98	-0.03	0.382284	0.42	0.724699	0.0760865	125.011	86.1	1.4
M125T91	590715	613839	8.35	585857	595958	12.23	1.01	0.01	0.798446	0.1	0.939353	0.207517	125.025	91	1.5
M126T154	570725	448849	63.9	443075	424591	10.22	1.29	0.37	0.645377	0.19	0.878479	0.652977	126.092	153.5	2.6
M126T159	5.11678e+06	4.66701e+06	33.84	4816900	4.06723e+06	62.4	1.06	0.09	0.382284	0.42	0.724699	0.427874	126.002	159	2.6
M126T166	3.04652e+06	2.76945e+06	28.2	3.48232e+06	3.29148e+06	33.27	0.87	-0.19	0.328205	0.48	0.683277	0.785511	126.001	166.5	2.8
M126T53	1.80414e+06	1.68848e+06	16.1	2.16291e+06	2.22322e+06	11.48	0.83	-0.26	0.0206682	1.68	0.184282	1.78886	125.9	53.1	0.9
M126T86	8.09233e+07	7.74561e+07	15.29	9.59797e+07	1.12426e+08	32.65	0.84	-0.25	0.234499	0.63	0.594903	0.493632	126.003	86.1	1.4
M126T89	1.03015e+06	1.05983e+06	27.72	1.18054e+06	1.12477e+06	10.76	0.87	-0.2	0.278632	0.55	0.636272	0.927212	126.02	88.7	1.5
M127T103	5711975	5.65598e+06	10.56	5.58021e+06	5.19919e+06	13.9	1.02	0.03	0.505361	0.3	0.806745	0.33719	127.04	102.7	1.7
M127T121	5.24454e+07	5.14089e+07	35.04	4.48385e+07	4.16641e+07	43.74	1.17	0.23	0.382284	0.42	0.724699	0.465165	127.04	121.2	2
M127T147	1.75649e+07	1.89328e+07	47.64	2.27823e+07	2.18579e+07	52.22	0.77	-0.38	0.505361	0.3	0.806745	0.46515	127.004	147.4	2.5
M127T277	241723	222194	25.69	222523	216395	22.5	1.09	0.12	0.645377	0.19	0.878479	0.537947	126.881	277.1	4.6
M127T303	426354	396631	34.22	617462	464307	82.36	0.69	-0.53	0.798446	0.1	0.939353	0.509473	127.076	303.3	5.1
M127T368	21931.5	18549.7	48.63	22397.9	16844.9	56.04	0.98	-0.03	1	0	1	0.0468672	126.881	368.2	6.1
M127T383	106996	88826.8	51.4	83665.4	78886.2	54.67	1.28	0.35	0.441803	0.35	0.767913	0.694762	126.881	382.6	6.4
M127T44	268608	248930	15.62	279913	275314	7.84	0.96	-0.06	0.194872	0.71	0.545008	0.570501	126.881	43.8	0.7
M127T493	58527.3	53340.7	58.35	123164	98175.4	87.94	0.48	-1.07	0.328205	0.48	0.683277	0.862522	127.113	493.5	8.2
M127T506	185117	185002	12.38	262765	258375	20.69	0.7	-0.51	0.0018648	2.73	0.0601903	2.09108	127.113	506.2	8.4
M127T86	1.87489e+06	1.62845e+06	37.7	1.56088e+06	1.57195e+06	35.77	1.2	0.26	0.573737	0.24	0.844385	0.823124	127.007	86.1	1.4
M128T120	1.02024e+06	944507	37.37	697341	723753	43.56	1.46	0.55	0.130381	0.88	0.452467	1.05578	128.072	119.6	2
M128T121	3.0704e+06	2.93349e+06	74.62	2.70042e+06	2.60611e+06	34.49	1.14	0.19	0.95913	0.02	0.990213	0.0508378	128.043	121.1	2
M128T147	891987	929319	34.18	1.2795e+06	1.27113e+06	55.73	0.7	-0.52	0.328205	0.48	0.683277	0.724497	128.007	147.2	2.5
M128T164	364043	342356	34.13	424317	451594	46.76	0.86	-0.22	0.645377	0.19	0.878479	0.0653406	128.007	164.1	2.7
M128T173	1.03509e+06	790405	79.8	560616	417644	83.44	1.85	0.88	0.328205	0.48	0.683277	1.08267	128.018	173.5	2.9
M128T204	120073	120884	33.48	124839	129378	74.31	0.96	-0.06	1	0	1	0.681326	127.998	204.1	3.4
M128T32	145342	142940	6.87	134268	137975	13.61	1.08	0.11	0.278632	0.55	0.636272	1.1128	127.957	31.5	0.5
M128T471	409773	352730	72.41	413999	232190	112.17	0.99	-0.01	0.95913	0.02	0.990213	0.498867	128.018	470.7	7.8
M128T55	557825	547759	25.02	523085	513524	21.59	1.07	0.09	0.720901	0.14	0.912068	0.412306	127.897	55	0.9
M128T80	7.62262e+07	7.65069e+07	44.09	6.12051e+07	5.12198e+07	54.51	1.25	0.32	0.645377	0.19	0.878479	0.861872	128.035	80.4	1.3
M128T87	1.55623e+06	1.47739e+06	21.54	1.2828e+06	1.39339e+06	19.86	1.21	0.28	0.194872	0.71	0.545008	1.25029	128.055	87.2	1.5
M128T90	2.48451e+08	2.32381e+08	20.55	4.53268e+08	4.10325e+08	46.8	0.55	-0.87	0.0498834	1.3	0.285686	1.58159	128.035	90.2	1.5
M129T100	1.11653e+06	358124	136.84	2.21535e+06	461092	152.27	0.5	-0.99	0.505361	0.3	0.806745	0.396788	128.96	99.8	1.7
M129T101	307944	337499	18.99	415793	413238	30.1	0.74	-0.43	0.0649573	1.19	0.325531	1.20169	128.983	101.5	1.7
M129T108	7.59796e+06	7.14844e+06	18.09	7.4664e+06	7452955	16.5	1.02	0.03	0.645377	0.19	0.878479	0.202497	129.019	107.6	1.8
M129T111	2.4817e+06	1.40975e+06	71.9	3.85379e+06	3.88151e+06	29.97	0.64	-0.63	0.104895	0.98	0.407489	1.40232	128.96	111.4	1.9
M129T148	856934	830909	52.12	1.45509e+06	1.26744e+06	45.67	0.59	-0.76	0.0649573	1.19	0.325531	1.00733	129.018	147.8	2.5
M129T603	77605.9	41727	82	122434	57046.2	110.65	0.63	-0.66	0.95913	0.02	0.990213	0.210948	129.129	603.4	10.1
M129T70	5.35472e+06	5.33281e+06	38.04	4.80726e+06	4.47993e+06	40.61	1.11	0.16	0.720901	0.14	0.912068	0.426586	129.019	70	1.2
M129T80	513006	520260	6.12	2.92306e+06	2.21541e+06	104.62	0.18	-2.51	0.0018648	2.73	0.0601903	1.63667	129.039	80.4	1.3
M129T82	482865	448119	48.96	958753	818990	65.59	0.5	-0.99	0.0649573	1.19	0.325531	1.26297	128.892	82.2	1.4
M129T84	4.18275e+07	3.99025e+07	14.16	3.8411e+07	3.70174e+07	15.08	1.09	0.12	0.234499	0.63	0.594903	0.888169	128.96	84.4	1.4
M129T88	2.74475e+07	2.85461e+07	32.55	1.82219e+07	1.81648e+07	58.43	1.51	0.59	0.194872	0.71	0.545008	1.26184	129.019	88.3	1.5
M129T96	2.71949e+07	2.60634e+07	52.66	1.17649e+07	1.22233e+07	58	2.31	1.21	0.014763	1.83	0.158002	1.8159	129.019	96.4	1.6
M130T102	1.70987e+07	1.7359e+07	20.66	1.85289e+07	1.90554e+07	33.78	0.92	-0.12	0.720901	0.14	0.912068	0.223493	130.051	101.9	1.7
M130T106	46766.7	35469.8	48.88	46109	47651.5	64.41	1.01	0.02	1	0	1	0.37219	130.033	106.1	1.8
M130T125	1.76353e+08	1.69794e+08	15.62	3.13293e+08	3.22316e+08	41.46	0.56	-0.83	0.0379176	1.42	0.250052	1.75027	130.087	124.7	2.1
M130T153	9.84955e+07	9.89679e+07	19.66	8.95501e+07	8.39873e+07	59.23	1.1	0.14	0.798446	0.1	0.939353	0.672354	130.087	153.2	2.6
M130T32	338054	318911	66.38	444556	504579	65.59	0.76	-0.4	0.573737	0.24	0.844385	0.49954	130.015	31.8	0.5
M130T417	28779.9	32220	25.85	31381	34022.7	30.51	0.92	-0.12	0.441803	0.35	0.767913	0.338188	130.033	417.2	7
M130T457	527500	323123	85.07	285467	251197	54.77	1.85	0.89	0.194872	0.71	0.545008	1.07309	130.041	457.1	7.6
M130T88_1	1.14468e+06	1.12462e+06	44.9	1.35655e+06	1.58532e+06	34.67	0.84	-0.24	0.441803	0.35	0.767913	0.522049	130.023	88.4	1.5
M130T95	7.03229e+08	6.76538e+08	12.83	8.37317e+08	8.34109e+08	18.13	0.84	-0.25	0.0498834	1.3	0.285686	1.41936	130.062	94.7	1.6
M131T102	750301	718673	20.79	746061	526717	51.74	1.01	0.01	0.328205	0.48	0.683277	0.510333	131.054	102	1.7
M131T122	1.23484e+06	1.23715e+06	15.15	1.42683e+06	1.3988e+06	15.59	0.87	-0.21	0.104895	0.98	0.407489	1.29333	131.071	121.9	2
M131T125	1.9021e+07	1.76284e+07	40.37	1.36133e+07	1.35706e+07	33.28	1.4	0.48	0.104895	0.98	0.407489	1.25489	131.091	124.7	2.1
M131T133	229376	241461	21.02	234747	161390	80.73	0.98	-0.03	0.505361	0.3	0.806745	0.645197	130.94	132.7	2.2
M131T154	5.04932e+06	4.68044e+06	34.55	6.82698e+06	6.67048e+06	18.46	0.74	-0.44	0.0281274	1.55	0.216677	1.52539	131.091	153.7	2.6
M131T216	1.06624e+06	1.01698e+06	23.7	1.60301e+06	1.47902e+06	50.41	0.67	-0.59	0.194872	0.71	0.545008	1.09677	131.072	216.1	3.6
M131T236	1.07132e+06	806572	66.5	886158	604205	63.81	1.21	0.27	0.328205	0.48	0.683277	0.555929	131.071	236.3	3.9
M131T355	2.89939e+06	3.0928e+06	42.92	2.00842e+06	2.45372e+06	52.81	1.44	0.53	0.160528	0.79	0.499935	0.819607	131.071	354.6	5.9
M131T363	9.52255e+06	9.07461e+06	11.58	1.083e+07	1.04971e+07	22.51	0.88	-0.19	0.382284	0.42	0.724699	0.895361	130.993	362.9	6
M131T57	1.55347e+06	1.34692e+06	43.28	1.55579e+06	1.38307e+06	42.71	1	0	0.95913	0.02	0.990213	0.0878056	130.94	57.1	1
M131T768	2.615e+06	2.59516e+06	34.15	3.07688e+06	2.63817e+06	57.78	0.85	-0.23	0.95913	0.02	0.990213	0.00243958	130.993	768.1	12.8
M131T815	1.07182e+07	7790910	49.53	1.08315e+07	1.06735e+07	34.74	0.99	-0.02	0.645377	0.19	0.878479	0.135593	130.993	814.8	13.6
M131T89	2.76198e+07	2.86467e+07	20.76	4.41435e+07	3.71532e+07	46.82	0.63	-0.68	0.0829837	1.08	0.365948	1.50624	131.083	89	1.5
M131T90	1.19028e+07	1.30607e+07	30.26	7.09316e+06	7.59147e+06	34.85	1.68	0.75	0.014763	1.83	0.158002	1.67317	130.984	90.3	1.5
M131T91	8.98552e+06	1.00045e+07	68.24	8.53289e+06	9.25735e+06	59.12	1.05	0.07	0.720901	0.14	0.912068	0.0699266	131.035	90.9	1.5
M131T95	2.73472e+07	2.14706e+07	64.06	4.25069e+07	2.31829e+07	96.2	0.64	-0.64	0.573737	0.24	0.844385	0.438603	131.066	94.7	1.6
M132T114	1.30503e+06	1.52226e+06	54.97	3.0993e+06	2.96124e+06	19.31	0.42	-1.25	0.0001554	3.81	0.0365579	2.12198	132.012	113.9	1.9
M132T125	366013	343162	20.39	454602	452995	36.03	0.81	-0.31	0.382284	0.42	0.724699	1.10748	132.092	125.2	2.1
M132T126	159594	153626	25.5	241453	217204	34.73	0.66	-0.6	0.0379176	1.42	0.250052	1.56883	132.03	125.6	2.1
M132T216	317773	240377	89.38	329293	256333	44.83	0.97	-0.05	0.328205	0.48	0.683277	0.681734	132.075	216.3	3.6
M132T354	35280.4	20572.3	120.75	57663.4	13341.3	151.09	0.61	-0.71	0.95913	0.02	0.990213	0.0356148	132.075	354	5.9
M132T374	576371	523421	38.88	388730	267703	74.71	1.48	0.57	0.160528	0.79	0.499935	1.37498	132.03	373.9	6.2
M132T89	830552	820923	18.43	1.29669e+06	1.26789e+06	39.97	0.64	-0.64	0.0829837	1.08	0.365948	1.47425	132.086	89.1	1.5
M132T91	611784	640765	18.5	739134	708252	52.22	0.83	-0.27	0.95913	0.02	0.990213	0.185743	131.984	90.6	1.5
M132T94	3.9038e+06	3.58353e+06	56.02	3.84145e+06	4.1461e+06	59.7	1.02	0.02	1	0	1	0.238396	132.067	94.4	1.6
M132T95	3.82242e+06	3.4578e+06	58.55	3.57824e+06	3.59998e+06	52.9	1.07	0.1	0.798446	0.1	0.939353	0.0972467	132.03	95.1	1.6
M133T109	3.99954e+07	3.86459e+07	23.97	3.69916e+07	3.69999e+07	28.32	1.08	0.11	0.645377	0.19	0.878479	0.644066	133.014	108.8	1.8
M133T137	4.72764e+06	4.19487e+06	25.32	5.57209e+06	5.79476e+06	36.72	0.85	-0.24	0.278632	0.55	0.636272	0.478831	132.868	137	2.3
M133T153	1.36599e+07	1.39214e+07	20.42	1.17528e+07	1.10897e+07	18.6	1.16	0.22	0.194872	0.71	0.545008	1.11799	133.013	153.5	2.6
M133T250	4.51013e+06	3.96985e+06	27.89	5.78731e+06	5.72935e+06	19.72	0.78	-0.36	0.0281274	1.55	0.216677	1.43781	133.014	250.5	4.2
M133T285	4.70556e+06	4.74886e+06	16.15	5.05316e+06	5.10052e+06	17.51	0.93	-0.1	0.720901	0.14	0.912068	0.72262	133.014	285.5	4.8
M133T303	2.35164e+06	2.3205e+06	29.03	2.97925e+06	3.21885e+06	40.17	0.79	-0.34	0.234499	0.63	0.594903	0.502615	133.014	303.5	5.1
M133T31_2	737672	713486	26.37	689493	687562	38.46	1.07	0.1	0.878477	0.06	0.966491	0.437073	132.923	31	0.5
M133T363	603662	527831	39.32	2.02265e+06	2.06827e+06	51.52	0.3	-1.74	0.0018648	2.73	0.0601903	2.23006	133.014	362.9	6
M133T37	1.13881e+07	1.12135e+07	37.55	12311294	1.21536e+07	40.72	0.93	-0.11	0.878477	0.06	0.966491	0.171052	132.868	37	0.6
M133T374	2.29238e+06	1503046	99.65	1.92678e+06	2.20491e+06	73.06	1.19	0.25	0.95913	0.02	0.990213	0.356064	133.014	374.2	6.2
M133T56	3.81139e+06	2.74398e+06	83.46	1.346e+07	1.46683e+07	69.4	0.28	-1.82	0.0206682	1.68	0.184282	1.7219	132.868	56	0.9
M133T57	395178	407156	16.61	237664	169299	53.59	1.66	0.73	0.0281274	1.55	0.216677	1.98739	132.935	56.9	0.9
M133T74_1	357080	475028	69.19	186931	82105.9	104.64	1.91	0.93	0.573737	0.24	0.844385	0.949774	132.976	74.2	1.2
M133T74_2	1.30642e+09	1.30255e+09	52.54	1.32139e+09	1.31363e+09	38.19	0.99	-0.02	0.878477	0.06	0.966491	0.162988	133.014	74.4	1.2
M133T74_3	678756	706453	19.99	853785	663686	60.42	0.79	-0.33	0.878477	0.06	0.966491	0.561194	133.055	74.2	1.2
M133T80	3.29586e+07	3.12708e+07	24.52	3.69283e+07	3.35554e+07	54.73	0.89	-0.16	0.95913	0.02	0.990213	0.201578	133.034	80.3	1.3
M133T81	2.131e+07	2.12888e+07	12.2	2.41485e+07	2.33607e+07	10.38	0.88	-0.18	0.0498834	1.3	0.285686	1.47047	132.946	81.3	1.4
M133T89	1.84531e+06	2.06316e+06	33.51	1.80246e+06	1.98075e+06	58.45	1.02	0.03	0.95913	0.02	0.990213	0.283496	133.051	88.7	1.5
M133T97	6.73767e+06	6.67197e+06	38.92	1.07443e+07	1.02486e+07	21.42	0.63	-0.67	0.00699301	2.16	0.1064	1.88878	133.051	96.9	1.6
M134T103	185813	188085	36.48	215872	200017	33.98	0.86	-0.22	0.278632	0.55	0.636272	0.613253	134.028	103.1	1.7
M134T111	76150.8	80577.1	33.98	56926.9	59024.9	45.93	1.34	0.42	0.130381	0.88	0.452467	1.00153	134.074	111.5	1.9
M134T114	148108	135168	32.65	116203	112241	39.83	1.27	0.35	0.194872	0.71	0.545008	1.03611	134.008	113.7	1.9
M134T126	646690	642862	39.22	366111	328436	88.28	1.77	0.82	0.160528	0.79	0.499935	1.46871	134.018	125.7	2.1
M134T184	22451390	2.18481e+07	17.94	2.17053e+07	2.25439e+07	16.04	1.03	0.05	0.798446	0.1	0.939353	0.273178	134.047	183.5	3.1
M134T243	7.03306e+06	4.46058e+06	86.05	6.31637e+06	4.18866e+06	92.2	1.11	0.16	0.505361	0.3	0.806745	0.427777	134.047	243.4	4.1
M134T284	220350	206821	25.65	483072	560613	41.24	0.46	-1.13	0.014763	1.83	0.158002	1.93158	134.018	284.3	4.7
M134T31	82505.4	81838.4	26.36	62813	63900	24.8	1.31	0.39	0.0379176	1.42	0.250052	1.33235	133.924	30.8	0.5
M134T335	2.40309e+06	2.47561e+06	55.19	2.16834e+06	2.58122e+06	51.78	1.11	0.15	0.720901	0.14	0.912068	0.347609	134.048	334.9	5.6
M134T378	2.02485e+06	1.95164e+06	21.45	2.0172e+06	1.99024e+06	12.34	1	0.01	0.95913	0.02	0.990213	0.232425	134.047	378	6.3
M134T433	2.7435e+06	2.86175e+06	30.4	2.47495e+06	2.61359e+06	27.43	1.11	0.15	0.505361	0.3	0.806745	0.462042	134.048	433	7.2
M134T456	429343	288471	128.53	883931	578696	128.82	0.49	-1.04	0.130381	0.88	0.452467	1.15136	134.036	455.7	7.6
M134T74	7.93583e+07	9.00631e+07	56.42	1.01035e+08	9.83394e+07	45.95	0.79	-0.35	0.278632	0.55	0.636272	0.804477	134.018	74.4	1.2
M135T122	4.99999e+08	4.76311e+08	26.66	8.063e+08	8.16934e+08	33.57	0.62	-0.69	0.014763	1.83	0.158002	1.79206	135.031	121.9	2
M135T138	4.97716e+06	4.78012e+06	15.45	7.80052e+06	7.52677e+06	22.81	0.64	-0.65	0.0018648	2.73	0.0601903	2.16055	134.865	137.6	2.3
M135T148	2.28546e+08	2.13957e+08	16.95	2.66297e+08	2.44927e+08	25.6	0.86	-0.22	0.194872	0.71	0.545008	0.962676	135.031	148.5	2.5
M135T149_2	105543	114597	39.24	113651	112698	50.11	0.93	-0.11	0.878477	0.06	0.966491	0.171477	135.073	148.6	2.5
M135T165	2.49237e+07	1.78664e+07	51.13	2.7675e+07	2.93984e+07	37.64	0.9	-0.15	0.720901	0.14	0.912068	0.408879	135.032	165.2	2.8
M135T183	782866	734841	51.8	1.16649e+06	1.24701e+06	38.81	0.67	-0.58	0.0498834	1.3	0.285686	0.884631	135.051	183.1	3.1
M135T243	536772	284335	101.94	519783	255737	148.99	1.03	0.05	0.573737	0.24	0.844385	0.505107	135.051	243.3	4.1
M135T251	9.27733e+06	9.06783e+06	16.82	1.3374e+07	1.18811e+07	23.29	0.69	-0.53	0.0029526	2.53	0.0725285	2.03209	135.032	250.6	4.2
M135T31	5.81749e+06	5.69028e+06	35.45	6.62385e+06	6.95011e+06	30.13	0.88	-0.19	0.573737	0.24	0.844385	0.527623	134.894	30.7	0.5
M135T327	111471	108071	22.15	86334.2	93764.1	29.27	1.29	0.37	0.0379176	1.42	0.250052	1.2983	135.051	326.6	5.4
M135T328	313676	355372	32.07	300503	294050	51.06	1.04	0.06	1	0	1	0.435062	135.02	327.8	5.5
M135T335	76879.8	89934.2	36.73	55990.7	51633.2	59.73	1.37	0.46	0.194872	0.71	0.545008	0.89594	135.051	334.9	5.6
M135T37	7.78415e+06	7.1022e+06	45.63	1.40009e+07	1.45666e+07	31.69	0.56	-0.85	0.00699301	2.16	0.1064	1.75079	134.865	37	0.6
M135T433	166444	124799	71.81	247307	241472	60.12	0.67	-0.57	0.278632	0.55	0.636272	1.04742	135.051	433.1	7.2
M135T521	2.38823e+06	2.23775e+06	61	1.95612e+06	1.8955e+06	51.48	1.22	0.29	0.573737	0.24	0.844385	0.25522	135.046	520.6	8.7
M135T528	31467.5	31732	42.48	30762.6	29335.2	46.09	1.02	0.03	0.95913	0.02	0.990213	0.308724	135.082	528.5	8.8
M135T56	9.13875e+06	9.10834e+06	65.44	8.80613e+06	9.94155e+06	50.3	1.04	0.05	0.95913	0.02	0.990213	0.0670812	134.865	55.6	0.9
M135T74	2.73269e+07	2.7721e+07	36.06	1.15109e+07	9.41305e+06	67.8	2.37	1.25	0.00699301	2.16	0.1064	2.01302	135.018	74.4	1.2
M135T798	3.09626e+06	3.10558e+06	19.58	3.29363e+06	3.26033e+06	17.54	0.94	-0.09	0.441803	0.35	0.767913	0.413571	134.865	797.6	13.3
M135T836	5.69396e+07	5.46031e+07	16.27	4.01115e+07	4.61998e+07	39.09	1.42	0.51	0.0379176	1.42	0.250052	1.55462	134.895	836.4	13.9
M136T101	1.66603e+06	1.68753e+06	32.83	1.05979e+06	1.05466e+06	75.75	1.57	0.65	0.234499	0.63	0.594903	1.42007	135.988	100.7	1.7
M136T102	7.51984e+06	9.03043e+06	46.98	4.04553e+06	2.16707e+06	84.49	1.86	0.89	0.0281274	1.55	0.216677	1.47612	135.971	102	1.7
M136T122	5.14549e+07	5.02428e+07	14.43	5.42972e+07	5.78857e+07	19.5	0.95	-0.08	0.645377	0.19	0.878479	0.455171	136.034	121.9	2
M136T148	6.27075e+06	5.0032e+06	94.42	1.45888e+07	5.66544e+06	131.23	0.43	-1.22	0.382284	0.42	0.724699	0.497925	136.034	148.5	2.5
M136T165	1.67002e+06	1.69407e+06	23.31	1.35353e+06	1.30765e+06	31.79	1.23	0.3	0.160528	0.79	0.499935	1.16079	136.034	165.5	2.8
M136T251	803828	804931	21.98	620731	506548	53.55	1.29	0.37	0.160528	0.79	0.499935	1.08563	136.034	250.6	4.2
M136T31	882481	856844	11.15	730505	871707	66.76	1.21	0.27	0.878477	0.06	0.966491	1.05853	135.894	30.7	0.5
M136T455	1.16222e+06	1.17011e+06	9.14	1.31739e+06	1.25762e+06	21.2	0.88	-0.18	0.328205	0.48	0.683277	0.928934	136.051	455.1	7.6
M136T478	1.41278e+06	984362	58.99	1.93231e+06	2.00605e+06	52.44	0.73	-0.45	0.234499	0.63	0.594903	0.705577	136.051	478.3	8
M136T520	283638	64336.1	142.93	235417	162222	97.88	1.2	0.27	0.798446	0.1	0.939353	0.245083	136.05	520.2	8.7
M136T603	101532	104374	35.1	105565	84897.4	49.06	0.96	-0.06	0.878477	0.06	0.966491	0.177864	136.017	603.2	10.1
M136T732	2.0838e+06	2.17218e+06	23.94	1.50879e+06	1.57221e+06	39	1.38	0.47	0.104895	0.98	0.407489	1.41062	135.971	732.2	12.2
M136T74	507010	520599	13.21	586270	568528	11.68	0.86	-0.21	0.0649573	1.19	0.325531	1.37537	136.022	74.1	1.2
M136T766	1.54265e+06	1.44932e+06	46.1	2.18159e+06	2.15142e+06	16.25	0.71	-0.5	0.0498834	1.3	0.285686	1.5168	135.971	766.4	12.8
M136T82	3.61615e+06	3.96102e+06	32.69	4.68763e+06	4.63782e+06	23.09	0.77	-0.37	0.104895	0.98	0.407489	1.28085	136.033	81.7	1.4
M136T837	3.62265e+06	2.78122e+06	36.27	3.28417e+06	2.97368e+06	40.65	1.1	0.14	0.234499	0.63	0.594903	0.524127	135.971	836.7	13.9
M137T116	466279	434675	34.3	457584	476019	27.84	1.02	0.03	0.798446	0.1	0.939353	0.0327046	137.024	116.2	1.9
M137T122	2.57793e+06	2.55889e+06	7.72	2.8963e+06	2.69434e+06	29.77	0.89	-0.17	0.798446	0.1	0.939353	0.497009	137.035	121.9	2
M137T137	3.16395e+06	2.79423e+06	30.82	2.32177e+06	2.41269e+06	37.1	1.36	0.45	0.130381	0.88	0.452467	1.28744	136.863	136.9	2.3
M137T148	723982	699130	33.4	1.11974e+06	1.04999e+06	22.08	0.65	-0.63	0.0029526	2.53	0.0725285	1.9136	137.036	147.7	2.5
M137T294	910887	955745	22.23	710990	464998	104.5	1.28	0.36	0.505361	0.3	0.806745	1.257	137.036	293.6	4.9
M137T31	2.0951e+06	1.58849e+06	59.66	1.88593e+06	1.44619e+06	74.39	1.11	0.15	0.720901	0.14	0.912068	0.333611	136.891	30.7	0.5
M137T366	2.47973e+06	2.33047e+06	19.26	2.7341e+06	2.81948e+06	18.44	0.91	-0.14	0.328205	0.48	0.683277	0.744466	137.024	365.9	6.1
M137T54	775058	811143	17.17	753574	695738	25.35	1.03	0.04	0.720901	0.14	0.912068	0.0780214	136.91	53.7	0.9
M137T56	3.53576e+06	2.77874e+06	55.84	4.10243e+06	3.99166e+06	41.28	0.86	-0.21	0.505361	0.3	0.806745	0.569483	136.863	55.9	0.9
M137T72	1.24127e+06	1.27412e+06	16.49	991414	995117	34.28	1.25	0.32	0.0649573	1.19	0.325531	1.37896	136.965	71.7	1.2
M137T82	1.63684e+06	1.47075e+06	34.95	1.36219e+06	1.23513e+06	25.12	1.2	0.26	0.328205	0.48	0.683277	0.839043	136.918	81.8	1.4
M137T837	2.06487e+07	1.94844e+07	39.54	1.59894e+07	1.49767e+07	23.23	1.29	0.37	0.278632	0.55	0.636272	0.797844	136.892	836.5	13.9
M137T94	8.97973e+06	9.2532e+06	13.95	5.92687e+06	6.14852e+06	18.03	1.52	0.6	0.0010878	2.96	0.0513787	2.23802	137.036	93.5	1.6
M138T224	1.35789e+06	1.31711e+06	24.97	1.53534e+06	1.48875e+06	31.55	0.88	-0.18	0.573737	0.24	0.844385	0.549823	138.056	223.8	3.7
M138T256	592763	658825	43.75	718863	725532	42.04	0.82	-0.28	0.573737	0.24	0.844385	0.71618	138.056	255.7	4.3
M138T31	210431	203193	29.56	208131	212291	25.38	1.01	0.02	0.798446	0.1	0.939353	0.093558	137.892	30.7	0.5
M138T336	1.29001e+06	1.2736e+06	22.23	764664	744733	24.27	1.69	0.75	0.0010878	2.96	0.0513787	2.2278	138.056	335.9	5.6
M138T611	2.38409e+06	2.27205e+06	23.95	3.33968e+06	3.47875e+06	24.91	0.71	-0.49	0.014763	1.83	0.158002	1.74117	138.02	611	10.2
M138T637	526326	470104	31.11	773935	799309	57.38	0.68	-0.56	0.278632	0.55	0.636272	0.790561	138.02	637	10.6
M139T118	701042	681424	56.98	391385	224297	77.33	1.79	0.84	0.234499	0.63	0.594903	1.15735	139.004	118.4	2
M139T31	115505	70996.8	109.82	111201	69554.6	118.43	1.04	0.05	0.95913	0.02	0.990213	0.110549	138.89	30.7	0.5
M139T37	458593	461913	17.08	498918	486097	15.43	0.92	-0.12	0.645377	0.19	0.878479	0.708031	138.86	37	0.6
M139T611	169942	160522	24.53	260972	269427	37.33	0.65	-0.62	0.0379176	1.42	0.250052	1.44767	139.023	611.1	10.2
M139T71	375537	364072	29.64	367253	376927	23.39	1.02	0.03	1	0	1	0.097221	139.04	70.8	1.2
M139T77	3.42392e+06	3.40859e+06	15.84	2.73202e+06	2.66982e+06	14.54	1.25	0.33	0.00699301	2.16	0.1064	1.96132	138.98	77	1.3
M140T118	4.40396e+06	4.36876e+06	3.8	4.39122e+06	4.42952e+06	4.66	1	0	0.878477	0.06	0.966491	0.0743901	140.083	118.1	2
M140T80	2.01491e+07	2.06553e+07	39.61	2.28214e+07	2.41052e+07	37.05	0.88	-0.18	0.720901	0.14	0.912068	0.431014	140.012	80.1	1.3
M140T92	1.70146e+07	1.23513e+07	77	2.80102e+07	2.87255e+07	55.4	0.61	-0.72	0.194872	0.71	0.545008	1.02833	139.985	92.3	1.5
M141T118	201174	140090	63.34	150050	97659.4	84.76	1.34	0.42	0.0498834	1.3	0.285686	1.00681	141.086	118.2	2
M141T120	686144	639140	16.48	480382	529966	37.85	1.43	0.51	0.0379176	1.42	0.250052	1.60603	141.019	120.1	2
M141T303	311962	240545	64.13	479352	351885	68.67	0.65	-0.62	0.328205	0.48	0.683277	0.89525	140.986	302.9	5
M141T82_2	3.56204e+06	3.73164e+06	15.96	2.80014e+06	2.89346e+06	19.9	1.27	0.35	0.0281274	1.55	0.216677	1.75219	141.056	81.5	1.4
M141T92	395037	407541	15.2	412816	420388	9.98	0.96	-0.06	0.645377	0.19	0.878479	0.407162	140.988	92	1.5
M142T119	2.03054e+06	2.0331e+06	15.27	2.30817e+06	2.33315e+06	13.95	0.88	-0.18	0.104895	0.98	0.407489	1.12324	142.051	118.7	2
M142T342	598612	599930	31.15	656915	648749	27.83	0.91	-0.13	0.573737	0.24	0.844385	0.684768	142.087	342.1	5.7
M142T363	163525	165338	11.83	132737	131943	27.7	1.23	0.3	0.0281274	1.55	0.216677	1.36531	142.066	363.2	6.1
M142T441	53671	56010.3	104.52	88986.4	7940.66	149.89	0.6	-0.73	1	0	1	0.350599	141.997	440.8	7.3
M142T92	1.46633e+06	1.43083e+06	38.32	2.19578e+06	2.30211e+06	67	0.67	-0.58	0.505361	0.3	0.806745	0.000951287	141.98	92.3	1.5
M143T100	1.67993e+06	1.37111e+06	57.34	2.14308e+06	2.21586e+06	61.84	0.78	-0.35	0.441803	0.35	0.767913	0.516473	143.046	99.9	1.7
M143T109	2.55958e+06	1.70721e+06	59.49	1.15412e+06	1.0507e+06	86.11	2.22	1.15	0.130381	0.88	0.452467	1.59192	143.035	108.7	1.8
M143T119	242057	273499	49.14	266121	276771	32.93	0.91	-0.14	0.878477	0.06	0.966491	0.326765	143.054	118.6	2
M143T31	46961.1	37597.1	91.77	57496.4	41419.8	91.28	0.82	-0.29	0.720901	0.14	0.912068	0.507414	142.929	31.4	0.5
M143T539	280210	98590.7	113.43	464580	603790	76.14	0.6	-0.73	0.645377	0.19	0.878479	0.458614	142.993	538.6	9
M143T679	336610	312106	32.34	549942	447313	46.47	0.61	-0.71	0.130381	0.88	0.452467	1.23586	143.108	678.8	11.3
M143T79	883901	893728	11.78	1.08669e+06	1.03645e+06	26.04	0.81	-0.3	0.234499	0.63	0.594903	1.27281	142.975	78.6	1.3
M143T91	3.99276e+06	3963618	5.38	3.86638e+06	3.65859e+06	16.04	1.03	0.05	0.382284	0.42	0.724699	0.592036	143.035	90.9	1.5
M144T107	2.48905e+06	2.47677e+06	21.44	2.63233e+06	2.31205e+06	30.66	0.95	-0.08	0.720901	0.14	0.912068	0.352851	144.03	107.4	1.8
M144T108	218540	204399	44.79	235707	248472	49.22	0.93	-0.11	0.720901	0.14	0.912068	0.0570227	144.002	107.6	1.8
M144T111	7.60624e+06	7.37922e+06	16.5	7.57165e+06	7.76099e+06	13.5	1	0.01	0.95913	0.02	0.990213	0.0544805	144.103	111.4	1.9
M144T122	3.80188e+06	3.51873e+06	31.81	2.29179e+06	2.03272e+06	50.92	1.66	0.73	0.014763	1.83	0.158002	1.66371	144.067	122.4	2
M144T128	190633	188789	12.85	175714	153923	42.53	1.08	0.12	0.278632	0.55	0.636272	0.669076	143.952	127.6	2.1
M144T303	252228	258340	12.34	261407	259242	15.02	0.96	-0.05	0.95913	0.02	0.990213	0.303629	143.952	303	5
M144T374	276619	276638	35.17	219388	245580	40.89	1.26	0.33	0.328205	0.48	0.683277	0.8526	143.952	373.9	6.2
M144T578	1.04229e+07	9.32504e+06	43.27	1.12482e+07	11839146	31.15	0.93	-0.11	0.95913	0.02	0.990213	0.380801	144.046	577.8	9.6
M144T89	1.93593e+06	1.90018e+06	26.77	2.8909e+06	2.40862e+06	32.75	0.67	-0.58	0.0498834	1.3	0.285686	1.60655	144.03	88.6	1.5
M144T92	8.86383e+06	8.56784e+06	26.4	1.35359e+07	1.33769e+07	39.54	0.65	-0.61	0.0498834	1.3	0.285686	1.29918	144.067	91.7	1.5
M145T103	4.81321e+07	5.06307e+07	24.47	5.34729e+07	6.0131e+07	32.12	0.9	-0.15	0.160528	0.79	0.499935	0.349386	145.051	102.6	1.7
M145T108	4.25473e+06	4022623	21.94	4274391	4.54021e+06	24.34	1	-0.01	0.95913	0.02	0.990213	0.048826	145.014	107.8	1.8
M145T109	2.21003e+07	2.56072e+07	38.82	1.81286e+07	2.04066e+07	43.72	1.22	0.29	0.194872	0.71	0.545008	0.546817	145.051	109.3	1.8
M145T112	552044	579919	44.7	401869	479578	68.03	1.37	0.46	0.328205	0.48	0.683277	0.915097	145.106	111.6	1.9
M145T126	3.47036e+06	1.46333e+06	172.42	2.08671e+06	1.48442e+06	78.28	1.66	0.73	0.720901	0.14	0.912068	0.0767915	145.062	125.9	2.1
M145T148	1.39399e+06	1.41053e+06	6.79	1.60597e+06	1.55764e+06	12.86	0.87	-0.2	0.00699301	2.16	0.1064	1.71761	144.992	148.1	2.5
M145T303	159511	169470	60.97	527762	503436	100.45	0.3	-1.73	0.160528	0.79	0.499935	0.881963	145.014	302.9	5
M145T31	1.1489e+06	1.11185e+06	48.58	1.52195e+06	1.54442e+06	30.01	0.75	-0.41	0.104895	0.98	0.407489	1.01813	144.924	31.1	0.5
M145T374	1.00879e+06	1.09405e+06	54.35	367176	302615	64.55	2.75	1.46	0.0206682	1.68	0.184282	1.53714	145.014	373.8	6.2
M145T378	858430	846245	48.17	1.07278e+06	1.0186e+06	68.18	0.8	-0.32	0.798446	0.1	0.939353	0.185755	145.087	377.5	6.3
M145T399	1.83885e+06	1.77106e+06	34.63	736373	922339	61.17	2.5	1.32	0.0003108	3.51	0.040447	1.7579	145.087	398.9	6.6
M145T429	1.72801e+06	1.69366e+06	44.07	2.97762e+06	2.91664e+06	45.37	0.58	-0.79	0.0649573	1.19	0.325531	1.59097	144.962	428.9	7.1
M145T578	2.25709e+06	2.40101e+06	19.91	1.82195e+06	1.82273e+06	24.75	1.24	0.31	0.0649573	1.19	0.325531	1.22054	145.049	577.8	9.6
M145T61	360869	346964	10.53	348417	355452	8.1	1.04	0.05	0.720901	0.14	0.912068	0.499066	144.924	61.4	1
M145T741	1.24592e+07	1.35524e+07	40.47	1.46445e+07	1.7352e+07	43.4	0.85	-0.23	0.328205	0.48	0.683277	0.367234	144.992	741.3	12.4
M145T76	1.07776e+06	1.06687e+06	8.62	1.07969e+06	1.0449e+06	7.09	1	0	1	0	1	0.115142	145.014	75.8	1.3
M145T768	2.46601e+06	1.77958e+06	107.15	1.98722e+07	9.3878e+06	123.93	0.12	-3.01	0.0206682	1.68	0.184282	1.71697	144.992	767.8	12.8
M145T785	1.18886e+07	4.19971e+06	137.76	3.74585e+06	1.67457e+06	137.98	3.17	1.67	0.573737	0.24	0.844385	0.599327	144.992	785.1	13.1
M145T84	8.25033e+06	8.09614e+06	16.51	8.12323e+06	7.74272e+06	24.32	1.02	0.02	0.720901	0.14	0.912068	0.186326	145.098	84	1.4
M145T87	1.09749e+09	6.09926e+08	81.52	1.9554e+09	6.06324e+08	196.83	0.56	-0.83	0.645377	0.19	0.878479	0.0891763	145.062	87	1.4
M145T96	624585	618085	18.25	1.80025e+06	1.44718e+06	65.67	0.35	-1.53	0.0010878	2.96	0.0513787	1.90044	145.014	96.3	1.6
M146T103	5.41195e+06	5.06312e+06	69.78	3.8903e+06	3.89474e+06	68.83	1.39	0.48	0.573737	0.24	0.844385	0.593492	146.054	102.6	1.7
M146T109	2.80732e+06	2.69543e+06	32.45	1.57688e+06	1.57148e+06	31.81	1.78	0.83	0.00699301	2.16	0.1064	1.94576	146.054	109.4	1.8
M146T126	204441	204243	33.27	196432	158359	47.97	1.04	0.06	0.645377	0.19	0.878479	0.247074	146.046	125.7	2.1
M146T224	74346.1	72244.6	29.88	49267.9	48978.8	35.66	1.51	0.59	0.0281274	1.55	0.216677	1.70777	146.061	223.8	3.7
M146T32	240694	244014	32.93	234544	214114	41.23	1.03	0.04	0.645377	0.19	0.878479	0.016573	145.914	31.5	0.5
M146T37	309280	263248	43.49	219385	194545	63.87	1.41	0.5	0.130381	0.88	0.452467	1.20603	145.931	36.9	0.6
M146T374	61749.5	69062.2	30.23	86257.7	86851.2	43.11	0.72	-0.48	0.160528	0.79	0.499935	1.05023	146.046	374.2	6.2
M146T80	7.94794e+08	8.09348e+08	10.13	7.75123e+08	7.8487e+08	7.61	1.03	0.04	0.505361	0.3	0.806745	0.484243	146.046	80.4	1.3
M146T87	1.28333e+07	1.2227e+07	36.33	2.84945e+07	2.69704e+07	57.77	0.45	-1.15	0.0281274	1.55	0.216677	1.63079	146.065	87	1.4
M146T89	3.2159e+07	3.23415e+07	13.37	3.4295e+07	3.39154e+07	8.25	0.94	-0.09	0.382284	0.42	0.724699	0.900314	146.082	89.5	1.5
M147T104_1	293440	322377	45.69	359304	342742	46.42	0.82	-0.29	0.505361	0.3	0.806745	0.735581	146.908	104.1	1.7
M147T104_2	3.42357e+06	3.47632e+06	23.5	1.7543e+06	1.70292e+06	39.17	1.95	0.96	0.0018648	2.73	0.0601903	2.07114	146.961	104.3	1.7
M147T104_3	5.54376e+06	5.78076e+06	19.77	6.43485e+06	6.80851e+06	21.14	0.86	-0.22	0.194872	0.71	0.545008	0.788761	147.066	103.8	1.7
M147T116	7.98676e+06	7.61707e+06	25.72	9.1583e+06	8.36103e+06	25.02	0.87	-0.2	0.328205	0.48	0.683277	0.793223	146.939	116.1	1.9
M147T120	625448	687345	25.65	521490	510802	20.6	1.2	0.26	0.194872	0.71	0.545008	0.89327	147.066	119.8	2
M147T129	9.03436e+06	5.94925e+06	105.44	3.94411e+06	4.01718e+06	69.34	2.29	1.2	0.720901	0.14	0.912068	0.118266	146.939	128.9	2.1
M147T285	7.72702e+06	7.90118e+06	35.83	1.03918e+07	9.20719e+06	33.89	0.74	-0.43	0.278632	0.55	0.636272	1.08563	147.045	285.5	4.8
M147T303	1.51782e+07	1.33072e+07	42.08	1.33655e+07	1.2941e+07	23.06	1.14	0.18	0.720901	0.14	0.912068	0.467818	147.045	303.4	5.1
M147T37	265087	271660	17.1	328596	341770	38.32	0.81	-0.31	0.104895	0.98	0.407489	0.671186	146.939	37.2	0.6
M147T429	882338	846321	21.69	850233	763536	42.12	1.04	0.05	0.798446	0.1	0.939353	0.405712	146.959	428.7	7.1
M147T52	3.35776e+07	3.83758e+07	35.95	3.59631e+07	3.78465e+07	34.54	0.93	-0.1	0.645377	0.19	0.878479	0.1164	146.939	52.2	0.9
M147T55	8.15293e+06	7.24119e+06	23.67	7.83957e+06	6.95795e+06	34.79	1.04	0.06	0.505361	0.3	0.806745	0.186236	146.923	55	0.9
M147T672	1.09339e+06	247732	157.51	801026	50662	188.85	1.36	0.45	0.278632	0.55	0.636272	0.730897	146.988	672.3	11.2
M147T70	1.95793e+06	1.99968e+06	12.6	1.7462e+06	1.76032e+06	10.55	1.12	0.17	0.0379176	1.42	0.250052	1.30526	146.938	69.6	1.2
M147T732	4.63821e+06	3.67429e+06	56.11	5.65217e+06	5.75325e+06	54.02	0.82	-0.29	0.382284	0.42	0.724699	0.0839501	146.994	732.4	12.2
M147T765	3.35889e+06	3.16493e+06	18.25	3.53208e+06	3.42224e+06	22.93	0.95	-0.07	0.878477	0.06	0.966491	0.248532	146.994	765.4	12.8
M147T773	451754	365205	35.62	1.06822e+06	1.00657e+06	41.81	0.42	-1.24	0.0029526	2.53	0.0725285	2.10773	146.994	773.2	12.9
M147T80	3.93599e+07	4.18397e+07	48.77	5.02008e+07	5.11041e+07	38.07	0.78	-0.35	0.328205	0.48	0.683277	0.837562	147.049	80.4	1.3
M147T84	1.28185e+07	1.34496e+07	16.23	1.74545e+07	1.1678e+07	97.3	0.73	-0.45	1	0	1	0.556748	146.983	84.1	1.4
M147T96	6.8306e+06	6.59092e+06	34.24	1.50315e+07	1.29992e+07	71.87	0.45	-1.14	0.0649573	1.19	0.325531	1.16875	147.066	95.6	1.6
M147T99	1.35599e+07	1.47656e+07	26.89	1.61245e+07	1.70504e+07	25.4	0.84	-0.25	0.130381	0.88	0.452467	0.908358	147.03	98.8	1.6
M148T122	5.65381e+07	5.51819e+07	38.66	5.37187e+07	5.32977e+07	34.86	1.05	0.07	0.645377	0.19	0.878479	0.223063	148.044	121.7	2
M148T285	1.4654e+06	1.43383e+06	20.11	904014	916454	23.18	1.62	0.7	0.0010878	2.96	0.0513787	2.18897	148.049	284.9	4.7
M148T37	206020	207263	8.82	218433	220947	8.82	0.94	-0.08	0.160528	0.79	0.499935	1.02612	147.94	37.3	0.6
M148T381	69200.6	77394.5	30.37	63949.3	69680.1	52.4	1.08	0.11	0.878477	0.06	0.966491	0.335738	148.063	380.8	6.3
M148T457	145930	52448.3	166.24	230876	170003	113.89	0.63	-0.66	1	0	1	0.348332	148.05	456.6	7.6
M148T480	179134	186069	39.63	385676	340778	81.98	0.46	-1.11	0.328205	0.48	0.683277	0.799508	148.05	480.3	8
M148T58	333865	332887	3.76	356101	355514	7.99	0.94	-0.09	0.104895	0.98	0.407489	1.28161	147.942	57.6	1
M148T80	8.35057e+06	8.43128e+06	60.23	1.13305e+07	1.13989e+07	53.68	0.74	-0.44	0.573737	0.24	0.844385	0.560519	148.05	80.4	1.3
M148T96	806207	671249	54.63	636449	642167	40.66	1.27	0.34	0.505361	0.3	0.806745	0.674065	148.07	95.6	1.6
M148T99	377361	346104	52.28	528271	502953	46.3	0.71	-0.49	0.278632	0.55	0.636272	1.05686	148.033	99.5	1.7
M149T104_1	98274.1	92214.2	17.43	111209	105579	21.45	0.88	-0.18	0.328205	0.48	0.683277	0.984014	148.907	103.9	1.7
M149T104_2	39582.5	43517.2	58.98	91573.2	84127.3	83.09	0.43	-1.21	0.278632	0.55	0.636272	0.82903	149.011	104.2	1.7
M149T37	70758.8	39137.8	77.52	29212	29071.9	23.83	2.42	1.28	0.0649573	1.19	0.325531	1.28862	148.942	36.9	0.6
M149T399	249313	238773	23.56	281766	313752	33.74	0.88	-0.18	0.328205	0.48	0.683277	0.180123	149.097	399.3	6.7
M149T56	409161	392874	19.47	414518	415031	22.56	0.99	-0.02	0.382284	0.42	0.724699	0.00508289	148.941	56.1	0.9
M149T57	313845	303396	13.62	366477	367661	15.83	0.86	-0.22	0.0829837	1.08	0.365948	1.51154	148.955	56.7	0.9
M149T617	489047	555980	40.52	546274	520613	45.26	0.9	-0.16	0.505361	0.3	0.806745	0.327459	149.061	617.4	10.3
M149T82	1.92538e+06	1.88033e+06	5.88	1.91144e+06	1.84783e+06	8.28	1.01	0.01	0.645377	0.19	0.878479	0.179637	149.046	81.7	1.4
M149T93	3.64475e+06	2.62568e+06	63.52	2.43425e+06	1.9719e+06	76.78	1.5	0.58	0.278632	0.55	0.636272	0.866212	149.046	93.4	1.6
M150T104	201527	155204	60.75	75968.7	69959.3	63.08	2.65	1.41	0.0018648	2.73	0.0601903	1.9225	150.003	104.2	1.7
M150T122_1	278080	112741	98.63	1.62191e+06	1.70822e+06	73.54	0.17	-2.54	0.0281274	1.55	0.216677	1.47724	150.023	121.6	2
M150T122_2	330778	325564	44.96	1.5477e+06	1.45558e+06	77.72	0.21	-2.23	0.0206682	1.68	0.184282	1.50504	150.04	121.6	2
M150T176	264523	268870	19.55	402395	409080	14.13	0.66	-0.61	0.0010878	2.96	0.0513787	2.29455	150.042	175.6	2.9
M150T269	299424	335343	43.44	255182	278327	62.73	1.17	0.23	0.382284	0.42	0.724699	0.558433	150.041	268.7	4.5
M150T334	100927	110458	58.03	87017.5	67816.3	81.5	1.16	0.21	0.645377	0.19	0.878479	0.518261	150.056	333.7	5.6
M150T617	79841.7	67544.5	37.23	48759.5	44956.4	59.19	1.64	0.71	0.0206682	1.68	0.184282	1.3388	150.064	617.3	10.3
M150T620	8.19926e+06	7.36314e+06	45.89	5.93435e+06	6.0214e+06	37.45	1.38	0.47	0.234499	0.63	0.594903	0.900692	150.002	619.8	10.3
M150T69	789878	774789	34.67	1.06566e+06	1.08786e+06	32.82	0.74	-0.43	0.0649573	1.19	0.325531	1.19915	150.023	68.6	1.1
M150T90	1.63065e+07	1.65456e+07	21.58	1.51448e+07	1.33163e+07	28.21	1.08	0.11	0.573737	0.24	0.844385	0.484806	149.987	90.3	1.5
M151T114	472743	483498	6.51	488183	494845	12.52	0.97	-0.05	0.505361	0.3	0.806745	0.276041	151.061	114	1.9
M151T151	1.29495e+08	1.56377e+08	40.38	1.76943e+08	1.69985e+08	19.97	0.73	-0.45	0.160528	0.79	0.499935	1.41873	151.026	151	2.5
M151T31	313802	312331	9	300961	289159	20.09	1.04	0.06	0.573737	0.24	0.844385	0.318382	150.891	30.7	0.5
M151T322	243459	224563	41.51	287483	102629	140.43	0.85	-0.24	0.234499	0.63	0.594903	0.841154	151.051	322.3	5.4
M151T370	7.00039e+06	1.29302e+06	215.29	7.96518e+06	1.73873e+06	193.26	0.88	-0.19	0.194872	0.71	0.545008	0.663785	150.999	370.2	6.2
M151T433	5.77281e+06	4610961	58.63	5.65589e+06	4.79485e+06	78.68	1.02	0.03	0.798446	0.1	0.939353	0.294005	150.999	432.8	7.2
M151T57	118148	107786	17.92	138687	138657	16.29	0.85	-0.23	0.160528	0.79	0.499935	1.30216	150.935	57.4	1
M151T603	2.68216e+06	1.91019e+06	70.12	3.35078e+06	3.32043e+06	45.81	0.8	-0.32	0.234499	0.63	0.594903	0.732726	151.04	603.2	10.1
M151T619	259546	282204	71.23	190008	126343	83.5	1.37	0.45	0.645377	0.19	0.878479	0.445518	151.004	619.1	10.3
M151T653	1.27911e+06	1.50943e+06	50.62	1.34819e+06	1.65004e+06	38.32	0.95	-0.08	1	0	1	0.357252	151.026	652.9	10.9
M151T668	389508	337854	64.32	401693	461904	62.11	0.97	-0.04	0.720901	0.14	0.912068	0.01637	151.149	667.6	11.1
M151T729	7.84748e+06	7.5297e+06	77.39	1.58484e+07	4.6671e+06	140.96	0.5	-1.01	0.878477	0.06	0.966491	0.626767	150.999	729.5	12.2
M151T759	2.37055e+07	2.45387e+07	35.32	2.33324e+07	1.91107e+07	49.26	1.02	0.02	0.798446	0.1	0.939353	0.208972	150.999	759	12.7
M151T768	1.32573e+06	1.2787e+06	70.63	1.76653e+06	1.57133e+06	39.61	0.75	-0.41	0.194872	0.71	0.545008	0.89421	150.999	768.3	12.8
M151T815	1.7977e+07	1.87372e+07	42.57	1.49434e+07	1.25665e+07	55.77	1.2	0.27	0.328205	0.48	0.683277	0.650842	150.999	814.8	13.6
M151T82	9.95576e+06	9.60102e+06	13.74	1.1903e+07	1.20841e+07	17.81	0.84	-0.26	0.0379176	1.42	0.250052	1.45893	150.887	82.4	1.4
M151T84	4.35004e+06	4.47033e+06	12.2	4.78163e+06	4.32367e+06	31.67	0.91	-0.14	0.878477	0.06	0.966491	0.453213	151.013	84.2	1.4
M151T91_2	2.66931e+07	3.21251e+07	44.79	2.17221e+07	1.73638e+07	59.61	1.23	0.3	0.720901	0.14	0.912068	0.613978	151.061	90.6	1.5
M152T122	5.42942e+07	5.33373e+07	11.23	3.64788e+07	3.22343e+07	29.31	1.49	0.57	0.0018648	2.73	0.0601903	2.03717	152.029	121.7	2
M152T151	9.02752e+06	8.6202e+06	16.92	1.07729e+07	1.14798e+07	17.18	0.84	-0.25	0.0379176	1.42	0.250052	1.37174	152.029	151	2.5
M152T31	44165.3	40271.7	33.99	36507.6	35425.6	35.98	1.21	0.27	0.328205	0.48	0.683277	0.691589	151.89	30.8	0.5
M152T523	700669	669926	65.48	227723	203314	77.25	3.08	1.62	0.0104118	1.98	0.130233	1.80316	152.044	522.7	8.7
M152T603	687784	515310	71.48	764969	383380	93.42	0.9	-0.15	0.798446	0.1	0.939353	0.247957	152.044	603.3	10.1
M152T619	258533	249252	33.53	308159	300368	19.66	0.84	-0.25	0.234499	0.63	0.594903	1.06468	151.998	619.3	10.3
M152T676	956599	1.0254e+06	35.21	660549	515134	76.74	1.45	0.53	0.234499	0.63	0.594903	1.14071	152.035	675.7	11.3
M152T698	2.53793e+06	2.51172e+06	13.13	2.43403e+06	2.4791e+06	30.76	1.04	0.06	0.798446	0.1	0.939353	0.573209	152.035	697.9	11.6
M152T89	1.00227e+08	9.31423e+07	15.42	1.11564e+08	1.1167e+08	11.67	0.9	-0.15	0.130381	0.88	0.452467	1.1529	152.002	88.7	1.5
M152T91_1	529916	543227	7.9	582874	579673	4.3	0.91	-0.14	0.004662	2.33	0.0886941	1.84543	151.982	90.6	1.5
M152T91_2	958240	1.14969e+06	47.16	1.28109e+06	1.25899e+06	32.59	0.75	-0.42	0.278632	0.55	0.636272	1.06552	152.065	90.7	1.5
M153T147	64833.7	63845.2	37.8	70875.7	75493.9	33.31	0.91	-0.13	0.720901	0.14	0.912068	0.480578	153.067	146.7	2.4
M153T281	383569	348919	36.32	293373	265896	35.89	1.31	0.39	0.104895	0.98	0.407489	1.1136	153.041	281.4	4.7
M153T31	145529	163553	47.84	98560.2	121351	47.84	1.48	0.56	0.0829837	1.08	0.365948	0.869841	152.887	30.7	0.5
M153T332	1.48646e+06	1.47179e+06	52.9	799901	649071	88.72	1.86	0.89	0.0649573	1.19	0.325531	1.32768	153.067	332.4	5.5
M153T355	637375	561298	57.59	1.70868e+06	1.94235e+06	41.12	0.37	-1.42	0.004662	2.33	0.0886941	2.11271	153.021	355.5	5.9
M153T567	106835	98284.7	42.18	142056	152564	47.81	0.75	-0.41	0.328205	0.48	0.683277	0.604582	153.092	566.7	9.4
M153T69	2.88777e+06	2.30125e+06	61.83	2.11272e+06	1.86115e+06	60.13	1.37	0.45	0.328205	0.48	0.683277	0.770051	152.986	69.3	1.2
M153T698	127809	119730	44	149505	147584	43.16	0.85	-0.23	0.505361	0.3	0.806745	0.459303	153.039	697.8	11.6
M153T75	1.15265e+06	1.1176e+06	9.38	1.14732e+06	1.14368e+06	6.87	1	0.01	0.95913	0.02	0.990213	0.0552335	152.986	74.9	1.2
M153T82	8.91552e+06	9.01276e+06	7.88	1.36221e+07	1.23317e+07	37.85	0.65	-0.61	0.0206682	1.68	0.184282	1.68185	152.884	82.4	1.4
M153T89	3.7436e+06	3.11274e+06	62.47	2.63689e+06	2.35195e+06	44.39	1.42	0.51	0.0649573	1.19	0.325531	1.13941	153.006	88.7	1.5
M154T101	6.88142e+06	6.90666e+06	8.62	7.44371e+06	7.57651e+06	8.29	0.92	-0.11	0.194872	0.71	0.545008	1.41314	153.982	101.4	1.7
M154T108	1.03706e+06	846884	62.98	1.01458e+06	1.01606e+06	48.51	1.02	0.03	0.798446	0.1	0.939353	0.0558387	154.06	108.1	1.8
M154T31	267008	293176	52.69	189762	104468	70.28	1.41	0.49	0.505361	0.3	0.806745	0.475882	153.869	31.1	0.5
M154T391	194516	108423	76.73	212464	197736	71.33	0.92	-0.13	0.95913	0.02	0.990213	0.172958	154.088	391	6.5
M154T667	98404.6	80574.7	58.7	185344	162346	61.57	0.53	-0.91	0.0829837	1.08	0.365948	1.22057	154.124	666.5	11.1
M154T720	1.29265e+07	1.04189e+07	50.77	1.79131e+07	1.99312e+07	46.05	0.72	-0.47	0.441803	0.35	0.767913	1.01854	153.992	720.4	12
M154T733	2.30168e+07	1.91734e+07	69.85	2.04425e+07	9.09745e+06	136.01	1.13	0.17	0.278632	0.55	0.636272	0.892714	153.992	732.7	12.2
M154T742	9.54266e+06	8.92466e+06	41.77	6.01206e+06	5.50793e+06	49.57	1.59	0.67	0.0498834	1.3	0.285686	1.4555	153.992	741.8	12.4
M154T750	4.05717e+07	4.19029e+07	28.09	3.10859e+07	2.57321e+07	42.96	1.31	0.38	0.104895	0.98	0.407489	1.27483	153.992	750	12.5
M154T760	209435	209610	31.06	325183	303254	23.01	0.64	-0.63	0.0029526	2.53	0.0725285	1.7775	154.064	760	12.7
M154T766	1.88528e+08	1.29958e+08	93.05	3.14649e+08	1.88785e+08	134.82	0.6	-0.74	0.645377	0.19	0.878479	0.799928	153.992	766.4	12.8
M154T783	7.15718e+07	6.50747e+07	37.19	6.62348e+07	5.08738e+07	61.08	1.08	0.11	0.573737	0.24	0.844385	0.397121	153.992	783.4	13.1
M154T794	6.15724e+07	7.5246e+07	52.3	63561014	5.795e+07	40.58	0.97	-0.05	0.878477	0.06	0.966491	0.519646	153.992	794	13.2
M154T798	2.58383e+06	2.51024e+06	41.6	2.43159e+06	2.32308e+06	18.4	1.06	0.09	0.798446	0.1	0.939353	0.00686611	153.869	797.8	13.3
M154T809	8.31875e+07	8.27329e+07	50.49	8.21578e+07	8.01239e+07	50.47	1.01	0.02	0.95913	0.02	0.990213	0.0108894	153.992	809.4	13.5
M154T816	4.33332e+06	2.06252e+06	89.39	4.68977e+06	4.1162e+06	70.93	0.92	-0.11	0.720901	0.14	0.912068	0.510127	153.869	815.9	13.6
M154T819	1.22387e+08	1.153e+08	37.11	1.13131e+08	1.0519e+08	33.57	1.08	0.11	0.878477	0.06	0.966491	0.206625	153.992	818.7	13.6
M154T832	5.29181e+07	5.41701e+07	40.04	5.58973e+07	4.76757e+07	50.43	0.95	-0.08	1	0	1	0.0735587	153.992	832.5	13.9
M154T836	3.22875e+07	3.40875e+07	64.76	1.89144e+07	1.97295e+07	51.41	1.71	0.77	0.194872	0.71	0.545008	0.84897	153.869	836.3	13.9
M154T89	5.35536e+06	6.03444e+06	46.79	5.91691e+06	6.62858e+06	51.36	0.91	-0.14	0.645377	0.19	0.878479	0.0909639	153.998	88.7	1.5
M154T94	2.02568e+08	2.00456e+08	52.63	3.91943e+08	3.96864e+08	59.54	0.52	-0.95	0.194872	0.71	0.545008	0.983585	154.062	93.7	1.6
M155T108	1.48026e+06	1.37019e+06	30.37	1.79665e+06	1.64076e+06	42.81	0.82	-0.28	0.573737	0.24	0.844385	0.606488	155.035	108	1.8
M155T121	945601	992377	36.86	1.04972e+06	962261	30.12	0.9	-0.15	0.95913	0.02	0.990213	0.626397	155.035	120.6	2
M155T31	18261.9	18339	12.39	18836.1	19790.9	13.35	0.97	-0.04	0.505361	0.3	0.806745	0.294046	154.869	31.1	0.5
M155T344	1.05598e+06	1.06311e+06	11.02	994562	1.072e+06	18.84	1.06	0.09	0.798446	0.1	0.939353	0.588908	155.071	343.9	5.7
M155T393	6.04664e+06	6.2866e+06	36.05	1.03122e+07	1.04429e+07	23.26	0.59	-0.77	0.004662	2.33	0.0886941	1.63567	155.035	393.4	6.6
M155T572	254990	212467	58.67	325939	308297	49.97	0.78	-0.35	0.505361	0.3	0.806745	0.747741	155.108	572.4	9.5
M155T648	822474	813829	58.15	1.0023e+06	853718	41.63	0.82	-0.29	0.441803	0.35	0.767913	0.845259	155.108	647.6	10.8
M155T82_1	3.03287e+06	2.86321e+06	29.49	3.93707e+06	3.96564e+06	26.34	0.77	-0.38	0.104895	0.98	0.407489	1.35626	154.881	82.4	1.4
M155T82_2	1.2803e+07	1.25665e+07	13.28	9.82721e+06	9.74236e+06	4.84	1.3	0.38	0.0001554	3.81	0.0365579	2.37476	154.928	82	1.4
M155T93	1.72958e+06	1.75847e+06	27.34	1.40475e+06	1.31806e+06	38.16	1.23	0.3	0.278632	0.55	0.636272	0.936779	155.035	92.6	1.5
M155T94_1	4.83266e+06	4.2231e+06	31.63	3.94695e+06	3.66111e+06	34.8	1.22	0.29	0.194872	0.71	0.545008	0.889608	155.046	93.7	1.6
M155T97	3.88437e+06	4.0705e+06	27.5	5.96874e+06	5.33723e+06	34.79	0.65	-0.62	0.0281274	1.55	0.216677	1.62334	155.01	96.7	1.6
M156T104	696368	762493	47.22	666225	701456	32.68	1.05	0.06	0.878477	0.06	0.966491	0.0950873	155.874	103.8	1.7
M156T107	329421	306924	44.61	315454	175232	105.11	1.04	0.06	0.160528	0.79	0.499935	0.818011	155.953	107.4	1.8
M156T126	112731	119383	20.04	132932	129043	20.53	0.85	-0.24	0.194872	0.71	0.545008	1.14419	155.953	126.3	2.1
M156T31	98854	93662.6	60.74	131590	156886	61.19	0.75	-0.41	0.382284	0.42	0.724699	0.384811	155.916	30.8	0.5
M156T326	47571.2	43206.9	39.32	105147	90815.8	50.26	0.45	-1.14	0.004662	2.33	0.0886941	2.00979	156.042	326	5.4
M156T37	472066	465843	16.52	531062	487296	26.11	0.89	-0.17	0.382284	0.42	0.724699	0.591992	155.874	37	0.6
M156T393	415733	432768	24.91	517431	526989	11.71	0.8	-0.32	0.0281274	1.55	0.216677	1.43681	156.038	393.4	6.6
M156T408	640702	581024	22.85	729333	684586	30.56	0.88	-0.19	0.441803	0.35	0.767913	0.594857	156.103	408.4	6.8
M156T54	316092	350011	39.49	296262	333307	40.05	1.07	0.09	0.720901	0.14	0.912068	0.298934	155.874	54.4	0.9
M156T631	289776	313454	41.68	367533	376937	39.8	0.79	-0.34	0.234499	0.63	0.594903	0.664256	155.874	630.8	10.5
M156T644	1.20688e+06	1.18267e+06	20	1.35861e+06	1.38406e+06	28.82	0.89	-0.17	0.382284	0.42	0.724699	0.654818	155.875	644.4	10.7
M156T686	1.33591e+06	1.3581e+06	25.24	1.31608e+06	1.4785e+06	42.13	1.02	0.02	1	0	1	0.391027	155.875	686.1	11.4
M156T72	1.91484e+06	1.20289e+06	111.45	2.0407e+06	1.36038e+06	107.04	0.94	-0.09	0.328205	0.48	0.683277	0.126369	155.978	72.4	1.2
M156T723	7.24467e+06	8.15948e+06	49.92	1.02149e+07	1.00286e+07	44.73	0.71	-0.5	0.234499	0.63	0.594903	0.903333	155.874	722.5	12
M156T750	1.68136e+06	1.82301e+06	32.74	1.68329e+06	1.69178e+06	50.3	1	0	0.798446	0.1	0.939353	0.270898	155.874	750.1	12.5
M156T836	9.13082e+06	8.45524e+06	41.46	6.7816e+06	6.61146e+06	32.93	1.35	0.43	0.194872	0.71	0.545008	1.14266	155.866	836.3	13.9
M156T85	5.18136e+06	5.11521e+06	4.15	4.79389e+06	5.07861e+06	29.13	1.08	0.11	0.720901	0.14	0.912068	0.552446	156.028	85.2	1.4
M156T88	1.71979e+06	1.78196e+06	18.61	1.55793e+06	1.51095e+06	16.82	1.1	0.14	0.382284	0.42	0.724699	0.681472	156.078	88.4	1.5
M156T94	1.56794e+06	1.52414e+06	11.27	1.69401e+06	1.6978e+06	6.24	0.93	-0.11	0.0649573	1.19	0.325531	1.36879	156.066	93.6	1.6
M157T753	1.69517e+07	1.62337e+07	61.97	9.05146e+06	8.4149e+06	57.78	1.87	0.91	0.0649573	1.19	0.325531	0.408726	157.123	753.5	12.6
M157T82	2.76004e+06	2.56878e+06	38.1	4.33595e+06	4.00025e+06	22.8	0.64	-0.65	0.0281274	1.55	0.216677	1.89823	156.925	82	1.4
M157T85	3.58368e+08	3.50572e+08	17.61	3.42957e+08	3.26203e+08	51.96	1.04	0.06	0.234499	0.63	0.594903	0.539207	157.012	84.7	1.4
M157T90_1	1.08288e+06	1.05944e+06	27.86	1.11605e+06	1.1086e+06	25.47	0.97	-0.04	0.645377	0.19	0.878479	0.120702	156.999	89.5	1.5
M157T90_2	62273.8	64655.5	21.68	450293	353367	97.31	0.14	-2.85	0.382284	0.42	0.724699	1.4258	157.062	89.9	1.5
M157T98	1.41654e+06	1.21382e+06	55.38	2.60946e+06	2.20398e+06	62.6	0.54	-0.88	0.0829837	1.08	0.365948	1.39441	156.963	98.5	1.6
M158T104	528938	569896	44.65	493620	224596	91.43	1.07	0.1	0.645377	0.19	0.878479	0.507488	157.872	103.8	1.7
M158T111_1	1.18003e+06	843616	73.94	2.95849e+06	2.86225e+06	76.87	0.4	-1.33	0.130381	0.88	0.452467	1.29604	158.082	111.4	1.9
M158T111_2	323600	291067	64.58	268634	261321	31.19	1.2	0.27	0.645377	0.19	0.878479	0.472614	158.119	111.4	1.9
M158T121	2.6366e+06	2.52568e+06	23.93	2.38455e+06	2.34256e+06	16.93	1.11	0.14	0.505361	0.3	0.806745	0.610304	158.046	121.5	2
M158T127	161157	165648	50.84	184052	185396	65.67	0.88	-0.19	0.878477	0.06	0.966491	0.0248604	157.931	126.7	2.1
M158T148	436314	403945	20.4	420366	414670	13.67	1.04	0.05	1	0	1	0.370858	158.046	147.7	2.5
M158T285	670492	680105	23.94	419985	352274	56.31	1.6	0.67	0.0281274	1.55	0.216677	1.69604	157.931	285.2	4.8
M158T304	4.31357e+06	4.13063e+06	16.76	4.76541e+06	4.59468e+06	19.1	0.91	-0.14	0.328205	0.48	0.683277	0.683634	158.082	304.2	5.1
M158T374	277871	199094	85.35	371758	364567	58.93	0.75	-0.42	0.278632	0.55	0.636272	0.800104	157.931	374.1	6.2
M158T431	19363.4	12926.5	63.68	55891.6	48096.8	62.47	0.35	-1.53	0.0104118	1.98	0.130233	1.97328	158.119	430.5	7.2
M158T461	68339	60831.1	33.4	96321.3	96447.4	22.49	0.71	-0.5	0.0281274	1.55	0.216677	1.72844	158.065	461	7.7
M158T54	190556	194491	15.48	221883	216249	15.88	0.86	-0.22	0.130381	0.88	0.452467	1.34556	157.872	54.4	0.9
M158T754	973338	655181	98.04	635667	608566	83.21	1.53	0.61	0.645377	0.19	0.878479	0.210435	158.127	753.5	12.6
M158T90	701569	770447	47.22	788723	945331	51.35	0.89	-0.17	0.645377	0.19	0.878479	0.309399	158.046	90.4	1.5
M158T97	962793	946677	9.67	897816	927845	10.21	1.07	0.1	0.328205	0.48	0.683277	0.992675	158.046	97.4	1.6
M159T116_2	53091	54213.8	7.79	57992.2	56855.1	12.7	0.92	-0.13	0.278632	0.55	0.636272	1.08036	159.001	115.8	1.9
M159T128	619553	587452	23.55	757259	789817	39.16	0.82	-0.29	0.194872	0.71	0.545008	0.430702	158.978	128.1	2.1
M159T141	658737	647298	17.19	530295	571653	41.03	1.24	0.31	0.278632	0.55	0.636272	1.01265	158.847	141.3	2.4
M159T304	143856	49236.7	102.59	280232	351563	55.38	0.51	-0.96	0.130381	0.88	0.452467	1.03693	159.086	304.2	5.1
M159T32	31846.1	26648.8	37.07	34922.5	32223.4	43.41	0.91	-0.13	0.645377	0.19	0.878479	0.168573	158.932	31.6	0.5
M159T329	577731	591777	30.36	297425	105822	119.39	1.94	0.96	0.0649573	1.19	0.325531	1.68917	158.991	328.8	5.5
M159T369	257116	272230	27.67	164316	109156	59.85	1.56	0.65	0.0649573	1.19	0.325531	1.54826	158.847	368.7	6.1
M159T387	1.73203e+06	1.8622e+06	33.88	1.55708e+06	1.60602e+06	27.25	1.11	0.15	0.505361	0.3	0.806745	0.431369	159.103	387.2	6.5
M159T393	199284	150459	51.12	319664	202440	94.62	0.62	-0.68	0.278632	0.55	0.636272	0.793383	158.99	393.4	6.6
M159T453	69521.5	73097.1	43.35	29209.4	32743.6	53.95	2.38	1.25	0.004662	2.33	0.0886941	1.58172	159.082	453.4	7.6
M159T465	2.63192e+07	2.29656e+07	76.9	3.59795e+07	2.35426e+07	98.97	0.73	-0.45	0.798446	0.1	0.939353	0.265084	159.102	465.1	7.8
M159T497	1.08477e+06	961595	58.75	3.63006e+06	3.178e+06	59.18	0.3	-1.74	0.004662	2.33	0.0886941	1.99125	159.102	496.6	8.3
M159T525	51083.7	56974.2	70.24	99945.7	107907	46.81	0.51	-0.97	0.0649573	1.19	0.325531	1.52842	159.056	525.3	8.8
M159T550	255524	127181	118.44	93885.7	80827.3	63.36	2.72	1.44	0.441803	0.35	0.767913	0.579555	159.056	549.8	9.2
M159T698	3.63829e+06	2.81844e+06	66.13	3.46886e+06	2.87847e+06	58.39	1.05	0.07	1	0	1	0.267808	158.847	698.3	11.6
M159T79	3.79693e+07	3.93345e+07	66.12	2.64326e+07	2.22099e+07	49.32	1.44	0.52	0.573737	0.24	0.844385	0.271172	158.925	78.7	1.3
M159T85	1.25752e+06	312860	152.01	1.81907e+06	909689	108.33	0.69	-0.53	0.573737	0.24	0.844385	0.558812	159.016	84.6	1.4
M159T89	796365	740484	25.1	793280	788239	43.48	1	0.01	0.95913	0.02	0.990213	0.35513	159.072	89.2	1.5
M159T90	7.41317e+07	7.10939e+07	47.6	5.2156e+07	4.35175e+07	76.5	1.42	0.51	0.441803	0.35	0.767913	0.986362	158.978	90.1	1.5
M159T97	2.39278e+06	2.21669e+06	20.01	2.165e+06	2.362e+06	40.31	1.11	0.14	0.573737	0.24	0.844385	0.715553	159.03	96.6	1.6
M160T116	2.18472e+06	2.17349e+06	45.61	1.22121e+06	1.11487e+06	63.6	1.79	0.84	0.0379176	1.42	0.250052	1.62255	160.061	116.2	1.9
M160T119	206640	223518	20.61	187865	179565	43.24	1.1	0.14	0.878477	0.06	0.966491	0.530715	160.007	118.8	2
M160T31	28065.3	22305.2	56.27	26024.3	19580.2	89.59	1.08	0.11	0.328205	0.48	0.683277	0.517639	159.939	31.2	0.5
M160T32	187453	179262	14.15	153681	119449	56.52	1.22	0.29	0.278632	0.55	0.636272	1.07232	159.894	31.5	0.5
M160T431	175266	173698	65.51	362880	320622	46.22	0.48	-1.05	0.014763	1.83	0.158002	1.52117	160.052	430.9	7.2
M160T465	899859	895832	45.95	1.18067e+06	1.24085e+06	43.49	0.76	-0.39	0.130381	0.88	0.452467	0.426242	160.106	465.1	7.8
M160T497	480199	523198	26.36	296790	332273	38.94	1.62	0.69	0.0206682	1.68	0.184282	1.55322	160.106	496.6	8.3
M160T90	2.01041e+06	2.07062e+06	51.32	3.89969e+06	4.99054e+06	76.75	0.52	-0.96	0.441803	0.35	0.767913	0.354402	159.979	90.2	1.5
M160T99_1	1033929	1.19236e+06	63.61	548085	306148	93.88	1.89	0.92	0.0498834	1.3	0.285686	1.27063	159.979	99.3	1.7
M161T134	1.49187e+07	1.45071e+07	28.44	1.28402e+07	1.36957e+07	21.93	1.16	0.22	0.645377	0.19	0.878479	0.761313	160.842	134.5	2.2
M161T31_1	124934	123770	6.33	124243	124105	9.53	1.01	0.01	0.720901	0.14	0.912068	0.147767	160.918	30.8	0.5
M161T31_2	102146	102599	20.65	113853	109074	15.38	0.9	-0.16	0.278632	0.55	0.636272	0.875401	160.936	31.1	0.5
M161T310	139396	149201	25.28	135211	132379	23.06	1.03	0.04	0.798446	0.1	0.939353	0.13086	160.897	309.6	5.2
M161T32	113496	87993.7	49.5	234777	193963	71.49	0.48	-1.05	0.0498834	1.3	0.285686	1.48001	160.893	31.6	0.5
M161T384	2.57126e+07	2.75857e+07	50.63	2.56846e+07	2.6132e+07	26.97	1	0	0.720901	0.14	0.912068	0.342483	160.842	384.1	6.4
M161T465	85523.8	73044.7	42.2	68945.8	63747	51.14	1.24	0.31	0.278632	0.55	0.636272	0.775081	161.107	465.2	7.8
M161T517	3.65109e+07	3.36582e+07	40.57	4.87554e+07	4.67686e+07	25.99	0.75	-0.42	0.0829837	1.08	0.365948	1.26068	160.842	517.1	8.6
M161T592	2.0753e+07	2.05802e+07	12.62	2.31038e+07	2.05879e+07	30.6	0.9	-0.15	0.878477	0.06	0.966491	0.563849	160.842	591.9	9.9
M161T602	5.37039e+07	6.47043e+07	48.69	5.27535e+07	5.13728e+07	51.34	1.02	0.03	0.95913	0.02	0.990213	0.0701869	160.842	601.7	10
M161T683	1.00243e+08	9.43438e+07	54.74	1.15741e+08	1.30021e+08	49.31	0.87	-0.21	0.645377	0.19	0.878479	0.39893	160.842	682.6	11.4
M161T697_1	4.13189e+07	3.65762e+07	34.57	5.21626e+07	4.65262e+07	51.38	0.79	-0.34	0.328205	0.48	0.683277	0.670744	160.842	697.5	11.6
M161T70	1.40852e+06	1.39031e+06	11.18	1.10175e+06	1.20784e+06	30.71	1.28	0.35	0.0206682	1.68	0.184282	1.12961	161.009	70.3	1.2
M161T754	3.39097e+06	2.90731e+06	45.08	5.51845e+06	4.97616e+06	73.74	0.61	-0.7	0.573737	0.24	0.844385	0.729269	160.842	754	12.6
M161T82	1.0067e+08	9.93083e+07	13.65	5.56676e+07	4.65067e+07	79.96	1.81	0.85	0.014763	1.83	0.158002	1.64959	160.842	81.8	1.4
M161T83_1	958507	953986	36.21	1.33967e+06	1.08513e+06	55.14	0.72	-0.48	0.505361	0.3	0.806745	0.656201	160.915	83.1	1.4
M161T83_2	643187	598643	30.06	859255	810113	34.96	0.75	-0.42	0.0829837	1.08	0.365948	1.32104	161.057	82.5	1.4
M161T89	1.66083e+06	1.81057e+06	42.75	1.34762e+06	1.26736e+06	62.8	1.23	0.3	0.441803	0.35	0.767913	0.609336	161.009	89.4	1.5
M161T90	5.51996e+06	5.27593e+06	38.65	4.76345e+06	4.31765e+06	39.62	1.16	0.21	0.573737	0.24	0.844385	0.630695	160.976	90.2	1.5
M161T99_1	982607	1.08512e+06	38.18	748557	756765	47.68	1.31	0.39	0.194872	0.71	0.545008	0.872228	160.976	99.5	1.7
M161T99_2	838436	762938	92.18	794250	763085	78.34	1.06	0.08	0.878477	0.06	0.966491	0.0971826	161.065	99	1.6
M162T111	378044	406155	24.83	452598	442867	12.12	0.84	-0.26	0.130381	0.88	0.452467	1.38806	162.023	110.6	1.8
M162T138	213316	252158	53.17	186360	196765	24.68	1.14	0.19	0.194872	0.71	0.545008	0.196724	161.843	138.4	2.3
M162T139	456615	515742	73.63	547647	576353	14.78	0.83	-0.26	0.878477	0.06	0.966491	1.08679	162.023	138.9	2.3
M162T149	188263	177568	45.56	249073	204173	82.51	0.76	-0.4	0.645377	0.19	0.878479	0.00257739	162.042	149.1	2.5
M162T303	144464	73542.3	90.95	125110	52786.7	91.18	1.15	0.21	0.278632	0.55	0.636272	0.508197	162.056	303.4	5.1
M162T31	81829.6	79952.2	59.23	87054.3	71015.4	65.56	0.94	-0.09	0.95913	0.02	0.990213	0.0911944	161.914	31.1	0.5
M162T374	6032799	5.10107e+06	70.52	4.59511e+06	4.95998e+06	40.02	1.31	0.39	0.720901	0.14	0.912068	0.451776	162.056	374.1	6.2
M162T383	47177.5	41044	44.92	49276.5	33298.8	70.15	0.96	-0.06	0.878477	0.06	0.966491	0.439056	161.843	383.2	6.4
M162T660	254805	257829	21.59	240419	205647	40.71	1.06	0.08	0.573737	0.24	0.844385	0.510202	162.056	660.3	11
M162T698	1.47307e+06	1.45853e+06	65.96	1.26889e+06	1.27843e+06	61.02	1.16	0.22	0.645377	0.19	0.878479	0.222413	161.843	697.8	11.6
M162T82	1.16758e+06	1.17052e+06	25.06	1.15566e+06	1.11872e+06	21.17	1.01	0.01	0.798446	0.1	0.939353	0.109328	161.843	81.8	1.4
M162T83	3.39418e+06	3.52491e+06	17.37	3.69346e+06	3.61352e+06	25.37	0.92	-0.12	0.798446	0.1	0.939353	0.543904	161.994	83.4	1.4
M162T91_1	258140	247272	14.77	424277	382557	44.01	0.61	-0.72	0.0281274	1.55	0.216677	1.53907	162.049	91.3	1.5
M162T91_2	765058	747214	53.57	786046	822359	49.39	0.97	-0.04	0.95913	0.02	0.990213	0.0471515	162.077	90.9	1.5
M163T100	298996	297294	13	273501	247960	22.74	1.09	0.13	0.441803	0.35	0.767913	0.850279	163.061	100.3	1.7
M163T112	239939	243194	17.85	244605	248890	14.18	0.98	-0.03	0.798446	0.1	0.939353	0.217601	163.013	112.1	1.9
M163T118	373341	346750	52.55	535636	559776	35.16	0.7	-0.52	0.104895	0.98	0.407489	1.19565	163.025	118.4	2
M163T122	1.37353e+06	1.32268e+06	20.16	1.41666e+06	1.40802e+06	17.58	0.97	-0.04	0.645377	0.19	0.878479	0.339928	163.04	122.1	2
M163T141	2349952	2.31034e+06	14.74	2.46013e+06	2.25084e+06	44.09	0.96	-0.07	0.720901	0.14	0.912068	0.0341645	162.839	141.1	2.4
M163T147	631436	637885	19.15	871424	800917	40.21	0.72	-0.46	0.104895	0.98	0.407489	1.25721	163.04	147.4	2.5
M163T310	253296	282652	44.13	381928	367841	26.86	0.66	-0.59	0.0379176	1.42	0.250052	1.48295	162.894	309.7	5.2
M163T32	215915	210246	6.94	229728	228973	10.68	0.94	-0.09	0.234499	0.63	0.594903	0.954122	162.894	31.6	0.5
M163T384	2.41555e+07	2.6988e+07	26.34	1.74616e+07	1.97136e+07	42.34	1.38	0.47	0.0498834	1.3	0.285686	1.30175	162.839	384.4	6.4
M163T396	100053	98898.5	68.25	1.26538e+06	1.08875e+06	101.97	0.08	-3.66	0.160528	0.79	0.499935	1.48728	163.04	395.5	6.6
M163T421	161669	120178	64.23	144667	84820.5	75.36	1.12	0.16	0.234499	0.63	0.594903	0.47123	163.077	420.6	7
M163T479	636765	556549	52.01	888106	765427	47.83	0.72	-0.48	0.234499	0.63	0.594903	1.01228	163.062	478.9	8
M163T498	1.07529e+06	1.11265e+06	23.83	1.2049e+06	1.18781e+06	42.78	0.89	-0.16	0.573737	0.24	0.844385	0.0129735	162.999	497.8	8.3
M163T517	4.40686e+07	2.89069e+07	76.84	2.3064e+07	2.23613e+07	51.82	1.91	0.93	0.234499	0.63	0.594903	1.00111	162.839	516.6	8.6
M163T550	1.37659e+06	1.11697e+06	91.51	505842	459963	80.07	2.72	1.44	0.160528	0.79	0.499935	1.02432	162.954	549.9	9.2
M163T582	55352.7	55400.7	48.28	47995.5	51663.8	31.13	1.15	0.21	0.573737	0.24	0.844385	0.227678	163.077	581.9	9.7
M163T592	4.97438e+07	4.32889e+07	48.15	4.40353e+07	3.88045e+07	51.11	1.13	0.18	0.720901	0.14	0.912068	0.45562	162.839	592.2	9.9
M163T60	220756	224173	12.84	258092	260194	16.55	0.86	-0.23	0.0829837	1.08	0.365948	1.2674	162.894	60	1
M163T609	1.18021e+06	990318	46.53	951068	857753	44.01	1.24	0.31	0.573737	0.24	0.844385	0.404569	163.04	608.9	10.1
M163T655	3.43834e+07	2.60554e+07	61.64	1.48549e+08	1.50161e+08	63.25	0.23	-2.11	0.0206682	1.68	0.184282	1.96449	162.839	655.1	10.9
M163T686	457055	492439	27.24	518936	435842	67.83	0.88	-0.18	0.95913	0.02	0.990213	0.454679	163.076	685.8	11.4
M163T692	48797.6	48345.3	34.4	233327	56136.4	218.12	0.21	-2.26	0.328205	0.48	0.683277	0.685719	163.077	691.9	11.5
M163T698	3.38889e+07	3.92522e+07	55.98	4.07807e+07	4.70805e+07	42.19	0.83	-0.27	0.328205	0.48	0.683277	0.566581	162.839	697.9	11.6
M163T75	7.66454e+06	7.74437e+06	18.22	6.44569e+06	7.66797e+06	49.1	1.19	0.25	0.798446	0.1	0.939353	0.766516	163.025	74.5	1.2
M163T82_1	5.90194e+07	5.794e+07	10.2	5.5465e+07	5.39238e+07	21.08	1.06	0.09	0.505361	0.3	0.806745	0.769746	162.839	81.8	1.4
M163T82_2	1.18323e+06	1.15758e+06	14.79	1.0985e+06	1.1511e+06	15.95	1.08	0.11	0.573737	0.24	0.844385	0.761737	163.025	82	1.4
M163T84	3.73955e+06	1.44068e+06	104.51	3.59709e+06	4.00308e+06	48.45	1.04	0.06	0.798446	0.1	0.939353	0.355085	162.957	84.1	1.4
M163T89	1.03606e+06	938078	29.32	1.57772e+06	1.17487e+06	105.82	0.66	-0.61	0.720901	0.14	0.912068	0.26527	163.025	89.5	1.5
M163T96	7.53966e+06	7.02093e+06	70.14	7.04031e+06	6.93588e+06	55.45	1.07	0.1	0.95913	0.02	0.990213	0.0296102	163.018	95.7	1.6
M164T112	40480.7	24397.2	83.18	138518	125020	85.66	0.29	-1.77	0.104895	0.98	0.407489	1.30586	164.083	112	1.9
M164T139	195863	207785	30	198082	193741	29.39	0.99	-0.02	0.798446	0.1	0.939353	0.00834595	163.84	138.7	2.3
M164T285	2.69439e+08	2.31053e+08	56.48	4.11693e+08	3.30526e+08	57.92	0.65	-0.61	0.104895	0.98	0.407489	1.20715	164.072	285.5	4.8
M164T303_1	69984	71988.3	42.06	64175	59531.6	48.65	1.09	0.13	0.505361	0.3	0.806745	0.300004	164.019	303.1	5.1
M164T303_2	2.40682e+08	2.21053e+08	24.66	2.55181e+08	2.56332e+08	22.9	0.94	-0.08	0.645377	0.19	0.878479	0.368196	164.072	303.4	5.1
M164T303_3	96894.4	97827.4	44.37	100118	106427	34.18	0.97	-0.05	0.95913	0.02	0.990213	0.293417	164.127	303.1	5.1
M164T349	2.42703e+06	2.46378e+06	35.8	2.49173e+06	2.43689e+06	52.78	0.97	-0.04	0.95913	0.02	0.990213	0.0912946	164.035	349.1	5.8
M164T498	1.87713e+06	1.49327e+06	65.03	2.69822e+06	2.78269e+06	25.8	0.7	-0.52	0.234499	0.63	0.594903	1.24837	164.07	498.1	8.3
M164T530	977405	893647	49.85	1.03889e+06	1.05373e+06	44.21	0.94	-0.09	0.505361	0.3	0.806745	0.190178	164.07	530.2	8.8
M164T542	1.73607e+06	1.68359e+06	67.77	1.54939e+06	1.35583e+06	44.04	1.12	0.16	0.573737	0.24	0.844385	0.397297	164.07	541.9	9
M164T568	1.9648e+06	1.7913e+06	62.42	1.8765e+06	1.64699e+06	58.7	1.05	0.07	0.95913	0.02	0.990213	0.162916	164.07	568.5	9.5
M164T589	1.23277e+06	1.30887e+06	41.97	1.19917e+06	1.08744e+06	30.01	1.03	0.04	0.95913	0.02	0.990213	0.0312772	164.07	589.5	9.8
M164T631	1.58132e+06	481961	180.94	1.21374e+06	660258	107.15	1.3	0.38	0.798446	0.1	0.939353	0.0978166	164.07	630.9	10.5
M164T666	2.12117e+06	2.04093e+06	40.38	1.60884e+06	1.47891e+06	58.65	1.32	0.4	0.194872	0.71	0.545008	0.798343	164.069	666	11.1
M164T679	3.60294e+06	2.10712e+06	84.81	4.19539e+06	3.64746e+06	55.36	0.86	-0.22	0.441803	0.35	0.767913	0.537477	164.069	679.1	11.3
M164T758	1.7812e+06	1.37391e+06	72.12	2.11167e+06	2.19308e+06	62.29	0.84	-0.25	0.720901	0.14	0.912068	0.527842	164.07	758.3	12.6
M164T82	1.09487e+06	1.0603e+06	12.85	1.59779e+06	1.51315e+06	23	0.69	-0.55	0.0010878	2.96	0.0513787	2.22985	163.839	81.8	1.4
M164T83	1043773	1.03447e+06	28.59	1.53117e+06	1.45947e+06	17.32	0.68	-0.55	0.004662	2.33	0.0886941	1.99073	163.991	83.5	1.4
M164T91	1.49124e+07	1.37394e+07	25.4	1.18769e+07	1.2489e+07	47.1	1.26	0.33	0.382284	0.42	0.724699	1.08224	164.039	90.5	1.5
M165T106	198642	204650	18.44	184224	193471	15.14	1.08	0.11	0.505361	0.3	0.806745	0.647943	164.986	106.2	1.8
M165T141	244316	238209	29.75	763615	664047	55.7	0.32	-1.64	0.000621601	3.21	0.0444681	2.15778	164.836	141.1	2.4
M165T284	2.06477e+07	1.28806e+07	77.92	2.22664e+07	1.7821e+07	62.65	0.93	-0.11	0.441803	0.35	0.767913	0.510021	165.076	284.3	4.7
M165T303	2.38815e+07	2.01056e+07	41.29	2.32049e+07	2.08858e+07	52.96	1.03	0.04	0.573737	0.24	0.844385	0.356558	165.076	303.4	5.1
M165T31	76263	78038.9	18.08	71324.4	72619.7	10.02	1.07	0.1	0.328205	0.48	0.683277	0.336846	164.927	31.5	0.5
M165T344	3.15218e+06	3.14557e+06	9.35	2.11387e+06	2.01034e+06	21.99	1.49	0.58	0.0029526	2.53	0.0725285	2.26813	165.056	343.9	5.7
M165T365	1.2273e+06	1.23691e+06	17.81	998607	1.04883e+06	40.65	1.23	0.3	0.234499	0.63	0.594903	0.940956	165.067	364.7	6.1
M165T374	2.88434e+06	2.64593e+06	31.9	2.44315e+06	2.32793e+06	32.21	1.18	0.24	0.278632	0.55	0.636272	0.774551	165.021	374	6.2
M165T385	2.19563e+06	2.20137e+06	6.51	1.92235e+06	1.89417e+06	9.38	1.14	0.19	0.00699301	2.16	0.1064	1.8645	164.836	385.1	6.4
M165T550	483992	412665	39.07	495859	400214	53.84	0.98	-0.03	0.878477	0.06	0.966491	0.206685	164.951	550	9.2
M165T593	215644	231398	30.14	245932	248560	25.37	0.88	-0.19	0.645377	0.19	0.878479	0.561058	165.092	592.9	9.9
M165T602	103156	102365	40.45	173175	192066	63.69	0.6	-0.75	0.194872	0.71	0.545008	0.601814	165.128	602.3	10
M165T615	382213	382771	28.1	371164	374456	31.11	1.03	0.04	0.878477	0.06	0.966491	0.23142	165.092	614.8	10.2
M165T627	429815	403133	44.42	271382	204989	60.08	1.58	0.66	0.104895	0.98	0.407489	1.30353	165.092	627.3	10.5
M165T654	2.49265e+07	2.36094e+07	42.96	4.388e+07	4.32793e+07	35.11	0.57	-0.82	0.014763	1.83	0.158002	1.6595	164.835	654.5	10.9
M165T679	2.87078e+07	2.72182e+07	19.56	2.61568e+07	2.34166e+07	64.49	1.1	0.13	0.505361	0.3	0.806745	0.612227	165.056	678.8	11.3
M165T698	9.7061e+06	1.02388e+07	31.34	1.96837e+07	1.90515e+07	38.49	0.49	-1.02	0.0018648	2.73	0.0601903	1.89345	164.836	697.7	11.6
M165T718	1.28536e+07	1.23428e+07	40.66	8.99299e+06	8.67761e+06	34.6	1.43	0.52	0.0829837	1.08	0.365948	1.18891	164.836	718.1	12
M165T72	1.42514e+07	9.98982e+06	69.41	2.21111e+07	1.35722e+07	75.44	0.64	-0.63	0.130381	0.88	0.452467	1.01083	165.041	72.5	1.2
M165T731	275516	287378	46.13	437160	436471	27.9	0.63	-0.67	0.0281274	1.55	0.216677	1.56247	165.092	730.8	12.2
M165T749	2.62039e+06	2.75108e+06	14.21	2.33706e+06	2.55343e+06	28.83	1.12	0.17	0.328205	0.48	0.683277	0.701099	164.836	748.8	12.5
M165T798	3.8703e+06	3.8377e+06	29.26	3.73777e+06	3.85375e+06	21.21	1.04	0.05	0.95913	0.02	0.990213	0.118577	165.019	798.2	13.3
M165T82_1	1.12342e+07	1.15898e+07	51.69	1.43614e+07	1.42785e+07	39.73	0.78	-0.35	0.328205	0.48	0.683277	0.856261	164.836	81.8	1.4
M165T83	1.25788e+06	1.24555e+06	9.21	1.10476e+06	1.11247e+06	6.24	1.14	0.19	0.004662	2.33	0.0886941	1.8136	164.957	83.3	1.4
M165T96	298209	288453	64.48	4.2614e+06	2.99022e+06	105.74	0.07	-3.84	0.0281274	1.55	0.216677	1.5732	165.041	95.9	1.6
M166T108	311347	292051	57	255069	225828	66.21	1.22	0.29	0.505361	0.3	0.806745	0.288356	166.023	108	1.8
M166T109	1.78914e+06	1.74106e+06	11.55	1.31628e+06	1.32198e+06	20.74	1.36	0.44	0.0003108	3.51	0.040447	2.13552	166.051	109	1.8
M166T114	31739.6	23373	67.12	56956.8	56141.9	49.05	0.56	-0.84	0.0829837	1.08	0.365948	1.26203	165.964	113.7	1.9
M166T119	1.13261e+06	1.17614e+06	46.25	591537	553370	43.21	1.91	0.94	0.0379176	1.42	0.250052	1.62454	166.018	119	2
M166T284	408917	422089	24.28	520559	518323	32.18	0.79	-0.35	0.160528	0.79	0.499935	1.03645	166.076	284.1	4.7
M166T303	829803	785885	30.32	500354	466869	23.52	1.66	0.73	0.0104118	1.98	0.130233	1.96455	166.076	303.4	5.1
M166T304	249621	282456	41.39	188798	173861	20.67	1.32	0.4	0.160528	0.79	0.499935	0.650286	166.099	304.1	5.1
M166T433	1.39519e+06	1.32866e+06	32.94	996023	1.08458e+06	49.67	1.4	0.49	0.0281274	1.55	0.216677	1.23887	165.986	432.8	7.2
M166T549	245160	248573	15.39	171900	192255	40.75	1.43	0.51	0.0206682	1.68	0.184282	1.48312	166.087	549.1	9.2
M166T672	338726	348440	34.19	251758	211529	52.61	1.35	0.43	0.104895	0.98	0.407489	1.07091	165.979	672.1	11.2
M166T679	3.09033e+06	3.26375e+06	37.36	3.3377e+06	3.33174e+06	47.04	0.93	-0.11	0.798446	0.1	0.939353	0.15074	166.059	678.8	11.3
M166T692	155736	142752	41.78	1.59838e+06	133700	258.74	0.1	-3.36	1	0	1	0.411683	166.016	691.7	11.5
M166T738	2.98958e+06	2.31114e+06	55.29	3.25965e+06	1.90011e+06	84.78	0.92	-0.12	0.382284	0.42	0.724699	0.139631	166.051	738.2	12.3
M166T82	2.85056e+07	2.86253e+07	13.03	3.53728e+07	3.62275e+07	23.24	0.81	-0.31	0.0498834	1.3	0.285686	1.50951	166.044	81.5	1.4
M166T98	2.64897e+08	2.55721e+08	14.6	2.68016e+08	2.74725e+08	17.09	0.99	-0.02	0.645377	0.19	0.878479	0.151054	166.018	98.3	1.6
M167T108	529167	554778	25.1	720366	705069	14.16	0.73	-0.45	0.0029526	2.53	0.0725285	1.8986	167.046	108.2	1.8
M167T368	33939.3	34155.4	21.32	29148.7	28156.6	19.67	1.16	0.22	0.0829837	1.08	0.365948	1.02088	166.833	368.5	6.1
M167T380	354256	361757	62.71	360595	340849	75.31	0.98	-0.03	0.878477	0.06	0.966491	0.235448	167.083	380	6.3
M167T521	92354	99491.7	28.87	85654.1	88050.5	24.81	1.08	0.11	0.441803	0.35	0.767913	0.432165	167.083	521.5	8.7
M167T588	2.58716e+06	2.20371e+06	57.81	828938	757293	52.54	3.12	1.64	0.00699301	2.16	0.1064	1.55672	166.994	588	9.8
M167T655	326990	255759	80.97	216421	194044	61.75	1.51	0.6	0.573737	0.24	0.844385	0.598937	167.144	654.9	10.9
M167T698	1.39346e+06	1.25916e+06	56.38	1.34232e+06	1.29061e+06	42.23	1.04	0.05	0.95913	0.02	0.990213	0.0240307	166.833	698.1	11.6
M167T722	968273	983301	24.79	939624	975312	36.04	1.03	0.04	0.95913	0.02	0.990213	0.204771	166.994	721.7	12
M167T765	8.21743e+06	7.14042e+06	48.06	1.08046e+07	1.01884e+07	38.38	0.76	-0.39	0.130381	0.88	0.452467	0.98757	166.994	765.4	12.8
M167T82_1	1.08637e+06	1.21453e+06	46.31	1.5202e+06	1.33452e+06	57.2	0.71	-0.48	0.505361	0.3	0.806745	0.664324	166.833	81.8	1.4
M167T82_2	2.00796e+06	2.0538e+06	36.44	3.71678e+06	3.88517e+06	28.87	0.54	-0.89	0.004662	2.33	0.0886941	1.82434	166.861	82.5	1.4
M167T98	6.2718e+07	6.69216e+07	48.64	6.81403e+07	8.11819e+07	46.95	0.92	-0.12	0.645377	0.19	0.878479	0.125264	167.021	98.4	1.6
M168T100_1	629272	632253	6.61	650647	661489	12.62	0.97	-0.05	0.505361	0.3	0.806745	0.485266	168.067	99.8	1.7
M168T100_2	4.40454e+06	4.93423e+06	46.15	4.01165e+06	3.69713e+06	48.69	1.1	0.13	0.645377	0.19	0.878479	0.0768602	168.078	100.3	1.7
M168T106	2.98127e+06	1.8606e+06	85.43	3.29348e+06	3.19377e+06	66.21	0.91	-0.14	0.720901	0.14	0.912068	0.544064	167.979	106.1	1.8
M168T111	142922	145451	46.75	222701	211912	30.3	0.64	-0.64	0.0498834	1.3	0.285686	1.46422	168.053	111.1	1.9
M168T121	3.13482e+06	2.85304e+06	57.97	1.23946e+06	1.07938e+06	66.9	2.53	1.34	0.0206682	1.68	0.184282	1.54878	167.979	121.4	2
M168T33	59494.3	55232.7	35.17	48692	44139.5	30.5	1.22	0.29	0.160528	0.79	0.499935	0.847639	167.837	32.6	0.5
M168T346	131557	130230	15.7	144549	144071	23.82	0.91	-0.14	0.328205	0.48	0.683277	0.483745	168.103	345.9	5.8
M168T380	5848.17	2299.17	131.35	34424.1	616.8	187.97	0.17	-2.56	0.441803	0.35	0.767913	0.264497	168.086	380.1	6.3
M168T443	112557	110059	39.71	150007	136966	30.93	0.75	-0.41	0.194872	0.71	0.545008	1.31613	168.103	443.1	7.4
M168T474	1.03271e+06	820200	55.84	736836	806159	33.63	1.4	0.49	0.505361	0.3	0.806745	0.744949	168.103	473.7	7.9
M168T624	563904	444205	94.45	898107	673051	105.28	0.63	-0.67	0.441803	0.35	0.767913	0.891464	168.03	624.4	10.4
M168T720	581297	497501	36.79	551211	466319	44.67	1.05	0.08	0.573737	0.24	0.844385	0.432739	168.139	719.6	12
M168T81	4.47516e+07	4.43012e+07	4.56	47085113	4.69565e+07	7.99	0.95	-0.07	0.194872	0.71	0.545008	1.07533	168.043	81.1	1.4
M168T82	2.66761e+06	2.22336e+06	37.17	1.82445e+06	1.51173e+06	39.67	1.46	0.55	0.0379176	1.42	0.250052	1.43915	168.028	82.1	1.4
M168T98	8.35431e+06	8.71641e+06	41.59	8.77877e+06	8.7064e+06	41.64	0.95	-0.07	0.95913	0.02	0.990213	0.287784	168.014	98.3	1.6
M168T99	5.65108e+06	5.85298e+06	34.03	6.60174e+06	6.28198e+06	53.13	0.86	-0.22	0.573737	0.24	0.844385	0.243661	168.025	98.6	1.6
M169T101_1	240206	244385	19.07	319740	300843	21.73	0.75	-0.41	0.0281274	1.55	0.216677	1.7779	169.062	100.9	1.7
M169T101_2	203433	183892	37.98	179898	187677	54.69	1.13	0.18	0.878477	0.06	0.966491	0.693392	169.081	100.6	1.7
M169T104	954301	998526	28.23	833112	799358	20.12	1.15	0.2	0.505361	0.3	0.806745	0.579897	169.008	104.4	1.7
M169T121	753686	794014	32.46	1.39008e+06	1.09948e+06	58.13	0.54	-0.88	0.0281274	1.55	0.216677	1.66424	169.013	121.2	2
M169T227	1.02588e+06	1.03092e+06	20.4	933102	972214	22.17	1.1	0.14	0.505361	0.3	0.806745	0.801349	168.836	227	3.8
M169T247	575302	492197	50.11	552718	471314	40.32	1.04	0.06	1	0	1	0.0420696	168.836	247.2	4.1
M169T315	3.13394e+06	2.96393e+06	36.64	2.72697e+06	3.07568e+06	44.76	1.15	0.2	0.720901	0.14	0.912068	0.593578	168.836	315	5.2
M169T344	982043	1034930	31.08	952488	960378	11.32	1.03	0.04	0.328205	0.48	0.683277	0.130944	168.836	344.5	5.7
M169T374	317357	271332	74.93	296873	222412	72.65	1.07	0.1	0.95913	0.02	0.990213	0.0272587	169.014	373.7	6.2
M169T472	800159	768467	23.89	792764	843567	44.28	1.01	0.01	0.95913	0.02	0.990213	0.389498	168.99	472.4	7.9
M169T473	31935.8	32391.7	20.61	70003	62117.1	49.56	0.46	-1.13	0.0104118	1.98	0.130233	1.95701	169.106	473.3	7.9
M169T77	1.34098e+06	1.09195e+06	34.55	2.13418e+06	2.1403e+06	26.29	0.63	-0.67	0.00699301	2.16	0.1064	1.89816	169.014	76.5	1.3
M169T83	1.71978e+06	1.32049e+06	51.7	816673	673653	112.78	2.11	1.07	0.0379176	1.42	0.250052	1.51226	168.858	82.5	1.4
M169T91	2.46525e+06	2.27988e+06	21.21	2.50234e+06	2.58997e+06	26.18	0.99	-0.02	0.573737	0.24	0.844385	0.00185604	169.018	91.1	1.5
M170T111	406919	423570	18.17	405266	364310	31.72	1	0.01	0.645377	0.19	0.878479	0.222406	170.094	110.5	1.8
M170T159	1.94358e+06	1.44636e+06	90.46	4.88335e+06	5.18494e+06	39.14	0.4	-1.33	0.004662	2.33	0.0886941	1.84706	169.992	158.9	2.6
M170T183	801104	815387	37.23	565855	488147	50.72	1.42	0.5	0.278632	0.55	0.636272	0.994306	170.024	183	3
M170T205	4.27269e+06	4.00038e+06	34.94	3.75732e+06	3.02513e+06	45.77	1.14	0.19	0.441803	0.35	0.767913	0.617151	169.992	204.8	3.4
M170T31	63960.7	65767.9	31.78	54772.4	62856.5	34.2	1.17	0.22	0.328205	0.48	0.683277	0.511227	169.916	31.5	0.5
M170T32	441262	429041	56.92	257191	233043	45.99	1.72	0.78	0.0829837	1.08	0.365948	1.2035	169.952	31.5	0.5
M170T33	83403.9	89990.7	41.3	87041.4	85352.5	32.34	0.96	-0.06	0.95913	0.02	0.990213	0.154518	169.834	32.6	0.5
M170T363	334108	292136	33.49	363486	365699	24.08	0.92	-0.12	0.573737	0.24	0.844385	0.535578	170.082	362.5	6
M170T677	163182	180105	40.27	147607	169668	47.39	1.11	0.14	0.645377	0.19	0.878479	0.472546	170.082	677.2	11.3
M171T100	2.76669e+06	2.78231e+06	29	2.74036e+06	2.62057e+06	20.77	1.01	0.01	0.95913	0.02	0.990213	0.0109065	171.077	99.6	1.7
M171T112	1.77226e+06	1.75345e+06	12.45	2.17921e+06	2.14479e+06	9.08	0.81	-0.3	0.0029526	2.53	0.0725285	2.05779	171.078	112.4	1.9
M171T113	325758	352609	30.95	483494	433675	60.11	0.67	-0.57	0.278632	0.55	0.636272	0.755929	171.041	112.7	1.9
M171T118	133450	120420	40.59	153409	136310	41.17	0.87	-0.2	0.645377	0.19	0.878479	0.40521	170.994	117.6	2
M171T121_1	1.19588e+07	1.14016e+07	23.69	1.80342e+07	1.7384e+07	32.94	0.66	-0.59	0.0649573	1.19	0.325531	1.58606	171.03	121.3	2
M171T121_2	5.23266e+06	4.80736e+06	29.36	3.90444e+06	3.60498e+06	36.61	1.34	0.42	0.104895	0.98	0.407489	1.31692	171.066	121.5	2
M171T125	528241	543193	37.74	841277	879358	37.85	0.63	-0.67	0.0498834	1.3	0.285686	1.31562	171.008	125.4	2.1
M171T148	1.63622e+06	1.68097e+06	44.64	1.48544e+06	1.50408e+06	49.19	1.1	0.14	0.878477	0.06	0.966491	0.309087	171.008	148.2	2.5
M171T159	98163.7	94086.9	20.05	202617	201123	50.5	0.48	-1.05	0.0379176	1.42	0.250052	1.25765	170.995	159.3	2.7
M171T214	418616	382827	50.48	413116	345449	63.32	1.01	0.02	1	0	1	0.0565695	170.871	214.4	3.6
M171T274	779483	666814	64.18	1.26393e+06	967444	100.17	0.62	-0.7	0.505361	0.3	0.806745	0.4304	170.871	274.4	4.6
M171T279	631941	709285	22.84	669632	674428	45.28	0.94	-0.08	0.878477	0.06	0.966491	0.340412	170.833	279.4	4.7
M171T303	3.54347e+06	3.64375e+06	16.22	3.45604e+06	3.1404e+06	20.99	1.03	0.04	0.798446	0.1	0.939353	0.263925	171.066	303.4	5.1
M171T345	2.12763e+06	1.65701e+06	59.25	2.75246e+06	2.59088e+06	36.55	0.77	-0.37	0.194872	0.71	0.545008	0.999522	170.833	344.5	5.7
M171T362	1.12606e+06	1.16774e+06	49.17	1.12431e+06	1.49199e+06	59.74	1	0	0.798446	0.1	0.939353	0.167385	171.067	362.1	6
M171T368	205612	222796	61.29	127899	131565	63.8	1.61	0.68	0.194872	0.71	0.545008	0.935573	170.871	368.4	6.1
M171T374	1.98473e+06	1.20228e+06	109.23	1.93694e+06	805137	137.57	1.02	0.04	0.878477	0.06	0.966491	0.276426	171.066	374.1	6.2
M171T375	552329	560594	59.24	1.12047e+06	998555	65.3	0.49	-1.02	0.104895	0.98	0.407489	1.10732	171.012	375.4	6.3
M171T383_1	1.93604e+06	1.26456e+06	108.65	7.87468e+06	9.28204e+06	54.72	0.25	-2.02	0.004662	2.33	0.0886941	2.08311	170.833	383.2	6.4
M171T383_2	756613	595360	50.33	928033	771369	54.56	0.82	-0.29	0.441803	0.35	0.767913	0.785955	170.871	382.6	6.4
M171T479	673839	499951	58.97	585200	616366	23.74	1.15	0.2	0.798446	0.1	0.939353	0.118507	170.985	478.5	8
M171T484	7.74569e+06	8.80303e+06	45.62	8.19068e+06	9.82631e+06	67.88	0.95	-0.08	0.573737	0.24	0.844385	0.093129	171.103	484.4	8.1
M171T493	868950	794090	39.28	1.03056e+06	958051	59.9	0.84	-0.25	0.505361	0.3	0.806745	0.0631567	170.985	493	8.2
M171T508	1.00664e+06	963353	24.38	885060	904298	17.12	1.14	0.19	0.645377	0.19	0.878479	0.755867	170.986	508.2	8.5
M171T532	120083	116433	33.81	205349	204755	37.42	0.58	-0.77	0.0206682	1.68	0.184282	1.76047	171.114	532.4	8.9
M171T565	3.48782e+06	2.23229e+06	76.37	1.76262e+06	1.91616e+06	30.16	1.98	0.98	0.130381	0.88	0.452467	1.51037	171.103	564.8	9.4
M171T69	1.03948e+06	963782	43.55	937846	946870	34.18	1.11	0.15	0.720901	0.14	0.912068	0.312043	171.03	69.2	1.2
M171T721	2.86152e+06	2.73876e+06	54.14	2.33978e+06	2.23733e+06	24.03	1.22	0.29	0.573737	0.24	0.844385	0.461363	171.101	720.6	12
M171T75	3.14809e+06	3.18128e+06	12.43	3.4256e+06	2.93133e+06	52.61	0.92	-0.12	0.798446	0.1	0.939353	0.253225	170.943	75.1	1.3
M171T768	2.00095e+06	2.06995e+06	32.3	1.32713e+06	1.21127e+06	55.25	1.51	0.59	0.0649573	1.19	0.325531	1.35882	171.1	768.2	12.8
M171T78	1.33984e+07	9.37769e+06	63.08	4.37856e+07	3.91187e+07	63.67	0.31	-1.71	0.00699301	2.16	0.1064	1.96602	171.006	77.7	1.3
M171T82_1	190267	202634	60.25	924055	756810	87.76	0.21	-2.28	0.130381	0.88	0.452467	1.45625	170.855	82.4	1.4
M171T82_2	2.03298e+06	1.73344e+06	62.1	3.64374e+06	2.17123e+06	94.78	0.56	-0.84	0.278632	0.55	0.636272	1.03875	170.902	82.1	1.4
M171T92_1	678899	683574	27.4	457414	475761	23.51	1.48	0.57	0.0104118	1.98	0.130233	1.6387	171.015	91.6	1.5
M171T92_2	743596	843538	51.04	1.77118e+06	1.94066e+06	41.93	0.42	-1.25	0.004662	2.33	0.0886941	1.69253	171.028	91.7	1.5
M172T100	35890.6	32909.5	20.33	40757.8	39889.8	9.05	0.88	-0.18	0.130381	0.88	0.452467	1.29495	172.081	99.8	1.7
M172T101	404875	449885	38.98	428814	406798	18.91	0.94	-0.08	0.95913	0.02	0.990213	0.494239	172.018	101.4	1.7
M172T113_1	50974.8	50736.3	19.72	51918.2	50868	10.96	0.98	-0.03	0.720901	0.14	0.912068	0.334883	172.007	113.1	1.9
M172T113_2	90351.6	89066.2	12.25	179524	180547	31.89	0.5	-0.99	0.004662	2.33	0.0886941	2.33279	172.073	113.3	1.9
M172T121_1	1.26e+06	1160295	32.69	1.54769e+06	1.58949e+06	27.35	0.81	-0.3	0.278632	0.55	0.636272	1.0281	172.033	121.2	2
M172T121_2	1.4135e+06	1.4353e+06	8.12	1.27992e+06	1.39469e+06	20.14	1.1	0.14	0.382284	0.42	0.724699	1.0752	172.061	120.5	2
M172T124	465041	483144	13.59	515889	512845	12.77	0.9	-0.15	0.194872	0.71	0.545008	1.09969	172.098	123.5	2.1
M172T183	218941	230514	28.44	208512	183123	34.13	1.05	0.07	0.95913	0.02	0.990213	0.201339	172.021	183	3
M172T240	841739	816434	21.33	1.00163e+06	960337	29.23	0.84	-0.25	0.234499	0.63	0.594903	0.88088	172.098	239.6	4
M172T303	165448	178352	53.82	229590	235826	46.81	0.72	-0.47	0.130381	0.88	0.452467	0.464171	172.07	303.3	5.1
M172T31	1.63353e+06	1.58044e+06	67.11	1.27668e+06	536193	128.97	1.28	0.36	0.194872	0.71	0.545008	0.891554	171.91	31.5	0.5
M172T346	1.44963e+06	1.46731e+06	38.19	2.01549e+06	1.9349e+06	35.89	0.72	-0.48	0.160528	0.79	0.499935	1.04995	172.098	346.2	5.8
M172T407	686051	566008	72	1.75465e+06	1.2129e+06	81.46	0.39	-1.35	0.0829837	1.08	0.365948	1.60258	172.098	406.6	6.8
M172T447	638943	611698	36.21	770255	768212	26.62	0.83	-0.27	0.0829837	1.08	0.365948	0.896854	172.041	447.2	7.5
M172T471	588125	643578	49.91	708693	707517	35.46	0.83	-0.27	0.573737	0.24	0.844385	0.792551	172.007	470.7	7.8
M172T475_1	91475.1	84832.1	33.82	93524.4	82530.4	44.72	0.98	-0.03	0.95913	0.02	0.990213	0.00560147	172.053	475	7.9
M172T484	1.29232e+06	1.29971e+06	14.89	898950	986547	33.15	1.44	0.52	0.0029526	2.53	0.0725285	1.3859	172.106	484.4	8.1
M172T58	759999	750472	9.48	815647	805075	15.73	0.93	-0.1	0.382284	0.42	0.724699	0.713783	171.91	58.1	1
M172T78	1.69802e+06	1.4209e+06	28.49	1.14402e+06	1.33465e+06	32.27	1.48	0.57	0.0104118	1.98	0.130233	1.32586	172.01	77.6	1.3
M172T84	1.19e+07	1.16159e+07	13.1	1.22861e+07	1.21215e+07	18.22	0.97	-0.05	0.95913	0.02	0.990213	0.304737	172.023	84.3	1.4
M172T94	1.63489e+06	1.54702e+06	20.41	1.12264e+06	1.0518e+06	86.2	1.46	0.54	0.0649573	1.19	0.325531	1.39262	172.026	94.2	1.6
M173T103	3.11791e+06	3.06577e+06	24.5	3.28822e+06	3.31937e+06	46.98	0.95	-0.08	0.720901	0.14	0.912068	0.342576	173.093	103.1	1.7
M173T106	1.64171e+06	1.5009e+06	23.44	1.92662e+06	1.88275e+06	25.87	0.85	-0.23	0.130381	0.88	0.452467	1.01761	173.057	106	1.8
M173T108_2	2.25852e+06	2.40538e+06	30.82	1.92714e+06	1.95715e+06	19.26	1.17	0.23	0.194872	0.71	0.545008	0.688385	173.046	107.8	1.8
M173T227	5.51003e+06	4.99656e+06	38.82	2.91406e+06	2.509e+06	62.97	1.89	0.92	0.0206682	1.68	0.184282	1.77363	172.831	227.3	3.8
M173T276	183086	153551	58.45	204278	185931	37.72	0.9	-0.16	0.382284	0.42	0.724699	0.552457	172.868	275.7	4.6
M173T31	506243	499938	7.39	509120	482738	10.86	0.99	-0.01	1	0	1	0.00789904	172.918	31.1	0.5
M173T345	1.73709e+06	1.47177e+06	47.11	1.39419e+06	1.49379e+06	53.2	1.25	0.32	0.720901	0.14	0.912068	0.585779	172.831	344.6	5.7
M173T347	185691	196897	47.26	147982	153579	50.98	1.25	0.33	0.441803	0.35	0.767913	0.342893	173.101	346.7	5.8
M173T35	115727	116640	18.33	99472.7	95088	41.87	1.16	0.22	0.194872	0.71	0.545008	0.945409	172.958	35.3	0.6
M173T368	36016.2	33552.1	39.74	23217.9	25952.4	63.96	1.55	0.63	0.130381	0.88	0.452467	1.08463	172.868	368.2	6.1
M173T383_1	2.58386e+06	1.65215e+06	80.92	1.65765e+06	1.35809e+06	68.66	1.56	0.64	0.573737	0.24	0.844385	0.692357	172.831	383.4	6.4
M173T387	3.39488e+06	3.05201e+06	73.31	6.6272e+06	3.95057e+06	126.89	0.51	-0.97	0.645377	0.19	0.878479	0.711615	172.992	387.3	6.5
M173T420	44951.7	45997	77.29	7510.58	5496.32	98.69	5.99	2.58	0.00699301	2.16	0.1064	1.93766	173.072	419.9	7
M173T44	487787	429306	66.54	349266	184322	80.78	1.4	0.48	0.328205	0.48	0.683277	0.907931	172.868	44.4	0.7
M173T471	45756.6	24925.6	97.49	35095.1	31838.3	84.79	1.3	0.38	0.720901	0.14	0.912068	0.464511	173.011	470.8	7.8
M173T503	1.40572e+06	1.3196e+06	40.87	1.3604e+06	1.10399e+06	48.46	1.03	0.05	0.798446	0.1	0.939353	0.161849	173.118	502.9	8.4
M173T508	324301	242200	53.76	421985	257523	71.81	0.77	-0.38	1	0	1	0.424969	172.982	508.3	8.5
M173T536	3.26893e+06	2.20186e+06	78.22	6.86309e+06	7.00153e+06	55.94	0.48	-1.07	0.0649573	1.19	0.325531	1.56484	173.118	536.3	8.9
M173T70	8.4429e+06	8.57802e+06	13.4	8.10481e+06	7.51216e+06	27.26	1.04	0.06	0.645377	0.19	0.878479	0.567549	173.009	70.1	1.2
M173T83	1.65019e+06	1.81711e+06	34.67	1.65147e+06	1.79498e+06	27.47	1	0	0.798446	0.1	0.939353	0.0169427	172.941	83.4	1.4
M173T84	4.59984e+06	4.94408e+06	22.27	4.798e+06	4.67084e+06	18.78	0.96	-0.06	0.878477	0.06	0.966491	0.395719	173.026	84	1.4
M173T85	3.35502e+07	3.49979e+07	14.54	3.25269e+07	3.5686e+07	29.32	1.03	0.04	0.720901	0.14	0.912068	0.47353	172.986	84.8	1.4
M173T88	1.03681e+08	1.03987e+08	7.77	1.04364e+08	1.02549e+08	11.79	0.99	-0.01	0.95913	0.02	0.990213	0.0127887	173.104	88.3	1.5
M174T103	108396	57965.6	98.52	409746	280230	93.18	0.26	-1.92	0.0829837	1.08	0.365948	1.33269	174.097	103.2	1.7
M174T104	96246.1	58279.4	111.03	1.38586e+06	1.0033e+06	104.51	0.07	-3.85	0.0018648	2.73	0.0601903	2.13078	174.041	104.2	1.7
M174T108	595199	403434	90.03	906458	632835	67.42	0.66	-0.61	0.328205	0.48	0.683277	0.946388	174.013	107.6	1.8
M174T110	2.66897e+06	2.92044e+06	38.7	3.74727e+06	3.17642e+06	53.87	0.71	-0.49	0.573737	0.24	0.844385	1.11569	174.077	109.9	1.8
M174T114	76663.7	67996.5	29.06	77440	73980.4	17.63	0.99	-0.01	0.505361	0.3	0.806745	0.323262	173.987	114.1	1.9
M174T122	2.53306e+06	2.61562e+06	11.04	2.42327e+06	2.48653e+06	17.56	1.05	0.06	0.720901	0.14	0.912068	0.528463	174.023	122.4	2
M174T143	37874.3	38003.3	21.64	47177.2	43516.6	32.78	0.8	-0.32	0.278632	0.55	0.636272	0.974243	174.085	143.5	2.4
M174T152	476058	386514	43.78	672478	688816	31.66	0.71	-0.5	0.160528	0.79	0.499935	1.08556	174.023	152	2.5
M174T174	61977	58551.1	51.64	81518.5	79720.5	43.98	0.76	-0.4	0.382284	0.42	0.724699	0.75417	174.077	173.7	2.9
M174T315	3.94426e+06	2.71534e+06	77.12	5.80721e+06	5.98956e+06	39.17	0.68	-0.56	0.0829837	1.08	0.365948	1.47978	174.023	315	5.2
M174T32_2	164130	142657	71.12	167830	172935	43.66	0.98	-0.03	0.878477	0.06	0.966491	0.275426	173.945	31.5	0.5
M174T32_3	58944.1	44698	72.46	116101	102314	72.11	0.51	-0.98	0.130381	0.88	0.452467	1.34676	173.963	31.8	0.5
M174T387	459770	438687	48.93	401115	368154	36.68	1.15	0.2	0.505361	0.3	0.806745	0.0982797	173.995	387.3	6.5
M174T453	90893.1	97262	46.67	43718.7	44419.4	31.97	2.08	1.06	0.0379176	1.42	0.250052	1.79508	174.122	453.4	7.6
M174T536	676741	663507	68.81	331175	369328	70.01	2.04	1.03	0.160528	0.79	0.499935	1.07555	174.122	536.4	8.9
M174T76	1.70606e+07	1.83033e+07	32.07	1.96009e+07	2.18475e+07	37.19	0.87	-0.2	0.328205	0.48	0.683277	0.296642	174.041	75.6	1.3
M174T85_1	297521	265864	24.74	1.11709e+06	940001	76.83	0.27	-1.91	0.00699301	2.16	0.1064	1.83637	173.989	84.7	1.4
M174T85_2	824735	860837	51.72	911652	914244	13.73	0.9	-0.14	0.798446	0.1	0.939353	0.680946	174.002	85.5	1.4
M174T88	1.93978e+07	1.86352e+07	67	1.04682e+07	7.28708e+06	91.9	1.85	0.89	0.104895	0.98	0.407489	1.18628	174.108	88.3	1.5
M174T93	1.73344e+06	1.67312e+06	39.2	1.99503e+06	1.60667e+06	74.85	0.87	-0.2	0.95913	0.02	0.990213	0.23857	174.077	92.8	1.5
M174T95	1004294	1.00114e+06	6.16	987411	1.03871e+06	12.19	1.02	0.02	0.878477	0.06	0.966491	0.450228	174.017	94.7	1.6
M174T96	670240	660263	12.59	658766	627643	9.1	1.02	0.02	0.573737	0.24	0.844385	0.231978	173.963	95.9	1.6
M175T104	2.81684e+07	2.96026e+07	26.65	2.63721e+07	2.8566e+07	24.29	1.07	0.1	0.798446	0.1	0.939353	0.280419	174.956	104.4	1.7
M175T107_2	690841	678975	20.93	780184	877808	23.27	0.89	-0.18	0.382284	0.42	0.724699	0.721163	175.061	107	1.8
M175T126_1	1.04481e+07	1.07776e+07	19.5	1.45188e+07	1.35349e+07	30.53	0.72	-0.47	0.0281274	1.55	0.216677	1.58248	174.956	126.1	2.1
M175T179	1.01011e+07	1.02009e+07	36.68	9.82736e+06	1.00056e+07	46.8	1.03	0.04	0.878477	0.06	0.966491	0.218229	174.955	179.1	3
M175T190	146407	161396	34.69	236739	267357	33.71	0.62	-0.69	0.0379176	1.42	0.250052	1.53857	175.098	190	3.2
M175T227	1.24074e+06	1.17686e+06	32.72	1.35754e+06	1.33621e+06	15.11	0.91	-0.13	0.234499	0.63	0.594903	0.734277	174.829	226.7	3.8
M175T295	922524	808631	32.32	1.81777e+06	1.49657e+06	38.06	0.51	-0.98	0.0029526	2.53	0.0725285	2.07088	175.098	294.9	4.9
M175T302	522478	505462	12.22	526962	512375	9.45	0.99	-0.01	0.645377	0.19	0.878479	0.185634	175.062	302	5
M175T303	1.03145e+06	1.05446e+06	10.98	811361	775288	30.08	1.27	0.35	0.0829837	1.08	0.365948	1.50318	175.098	302.6	5
M175T314	570668	555808	79.43	771015	622169	63.98	0.74	-0.43	0.382284	0.42	0.724699	0.78348	174.829	314.4	5.2
M175T32	35609.1	34767.5	12.47	35823.5	33630.8	16.75	0.99	-0.01	1	0	1	0.0513805	174.927	31.5	0.5
M175T344	1.04433e+06	1.07994e+06	36.39	828360	820694	29	1.26	0.33	0.328205	0.48	0.683277	1.01772	174.828	344.4	5.7
M175T362	120843	131563	26.39	159788	163232	19.67	0.76	-0.4	0.014763	1.83	0.158002	1.31519	175.061	362.3	6
M175T368_1	209358	197127	49.02	135341	143711	61.45	1.55	0.63	0.194872	0.71	0.545008	0.860637	174.829	368.4	6.1
M175T368_2	2.00016e+06	1.88991e+06	35.85	2.34981e+06	2.23452e+06	45.86	0.85	-0.23	0.645377	0.19	0.878479	0.448681	174.957	368	6.1
M175T374	532101	505728	30.47	505638	448588	21.9	1.05	0.07	0.798446	0.1	0.939353	0.156248	175.061	373.9	6.2
M175T375	97224	102218	40.71	125354	123931	18.98	0.78	-0.37	0.194872	0.71	0.545008	1.07976	175.098	374.7	6.2
M175T380	1.53846e+06	1.66832e+06	25.26	1.81195e+06	1.81394e+06	30.34	0.85	-0.24	0.328205	0.48	0.683277	0.740538	174.954	380.4	6.3
M175T387	628239	598473	60.77	627875	669617	42.24	1	0	1	0	1	0.324602	174.988	387.2	6.5
M175T396	362122	372710	23.48	471693	473740	30.54	0.77	-0.38	0.160528	0.79	0.499935	1.10297	175.098	395.8	6.6
M175T433	111192	118358	21.68	258106	213932	67.76	0.43	-1.21	0.0379176	1.42	0.250052	1.77808	175.098	433	7.2
M175T534	265908	264142	20.18	251279	265810	20.07	1.06	0.08	0.645377	0.19	0.878479	0.270909	175.06	533.5	8.9
M175T56	8.40114e+06	8.74599e+06	12.68	9.06715e+06	8.75732e+06	10.09	0.93	-0.11	0.441803	0.35	0.767913	0.852117	174.955	56	0.9
M175T69	654402	758128	37.81	525068	666768	54.01	1.25	0.32	0.234499	0.63	0.594903	0.740702	174.988	69.3	1.2
M175T741	483008	414067	54.64	535656	481097	61.3	0.9	-0.15	0.878477	0.06	0.966491	0.2213	175.116	741.4	12.4
M175T76_2	3.41883e+06	3.31107e+06	57.37	2.96438e+06	3.0617e+06	30.36	1.15	0.21	0.798446	0.1	0.939353	0.136158	175.044	75.7	1.3
M175T833	7.81752e+07	7.86218e+07	31.84	9.78885e+07	9.7762e+07	32.63	0.8	-0.32	0.160528	0.79	0.499935	0.895646	174.982	832.8	13.9
M175T85	3.12571e+06	3.11973e+06	27.75	1.88e+06	1.99709e+06	33.52	1.66	0.73	0.00699301	2.16	0.1064	1.78858	174.984	84.8	1.4
M175T88	675688	673289	13.95	738434	736252	21.44	0.92	-0.13	0.234499	0.63	0.594903	0.805203	175.072	88.3	1.5
M176T128	159270	187729	52.18	358627	357812	26.31	0.44	-1.17	0.000621601	3.21	0.0444681	2.09272	175.942	128.2	2.1
M176T147	680487	630804	66.59	843882	760937	73.89	0.81	-0.31	0.878477	0.06	0.966491	0.277918	176.039	147.3	2.5
M176T303	401054	385987	66.97	547195	486040	69.71	0.73	-0.45	0.278632	0.55	0.636272	0.669079	175.942	302.9	5
M176T315	324547	265912	89.06	166205	93732.6	101.63	1.95	0.97	0.194872	0.71	0.545008	0.180849	176.019	315	5.2
M176T35	30317.9	13093.1	122.03	33118.5	3373.23	140.34	0.92	-0.13	0.505361	0.3	0.806745	0.673507	175.942	34.5	0.6
M176T67	95538.4	67414.4	65.29	126904	123516	46.6	0.75	-0.41	0.328205	0.48	0.683277	0.984301	175.942	67.2	1.1
M176T81	1.63167e+07	1.56504e+07	7.13	1.62008e+07	1.55383e+07	8.11	1.01	0.01	0.573737	0.24	0.844385	0.140386	176.056	81.4	1.4
M176T96	1.44099e+06	1.49724e+06	20.99	1.59993e+06	1.51786e+06	21.83	0.9	-0.15	0.720901	0.14	0.912068	0.675116	176.002	96.4	1.6
M177T107	100773	103621	15.31	94292.8	104623	46.26	1.07	0.1	0.95913	0.02	0.990213	0.794503	177.077	106.9	1.8
M177T111	147874	155802	12.92	155905	157436	4.38	0.95	-0.08	0.382284	0.42	0.724699	0.750621	176.986	111.1	1.9
M177T618	274350	288250	33.25	233706	156806	76.14	1.17	0.23	0.194872	0.71	0.545008	0.820646	177.092	618.4	10.3
M177T73	420678	347034	43.31	558237	360274	77.05	0.75	-0.41	0.720901	0.14	0.912068	0.440425	176.926	72.5	1.2
M177T76	3.79656e+06	3.56667e+06	30.08	5.46419e+06	5.27242e+06	53.75	0.69	-0.53	0.328205	0.48	0.683277	0.604811	177.04	76.2	1.3
M177T765	7.537e+06	6.93941e+06	27.55	4.66708e+06	3.82765e+06	50.12	1.61	0.69	0.0379176	1.42	0.250052	1.76426	177.092	765.2	12.8
M177T79	1.19517e+09	1.22024e+09	20.41	1.0181e+09	1.01419e+09	15.69	1.17	0.23	0.0379176	1.42	0.250052	1.0211	176.935	78.7	1.3
M177T809	2.44818e+06	2.37398e+06	26.59	2.62164e+06	2.63698e+06	31.33	0.93	-0.1	1	0	1	0.277627	177.165	809	13.5
M178T108	1.76155e+08	1.59924e+08	27.57	1.67992e+08	1.73881e+08	34.95	1.05	0.07	0.95913	0.02	0.990213	0.389116	178.018	108.4	1.8
M178T276	102727	101435	41.18	133410	135534	51.35	0.77	-0.38	0.441803	0.35	0.767913	0.562679	177.845	276.5	4.6
M178T31	355595	352022	8.06	313005	336199	16.27	1.14	0.18	0.160528	0.79	0.499935	1.39804	177.903	31.5	0.5
M178T334	2.48014e+06	2.52871e+06	54.09	3.12418e+06	3.01353e+06	23.53	0.79	-0.33	0.382284	0.42	0.724699	0.875259	178.051	333.9	5.6
M178T432	86178.3	93888.2	39.26	66612.6	64091.6	48.92	1.29	0.37	0.505361	0.3	0.806745	0.798373	178.015	431.9	7.2
M178T477	738116	696370	26.44	1.02415e+06	962547	46.07	0.72	-0.47	0.278632	0.55	0.636272	1.03762	178.049	477.2	8
M178T565	63082.7	59037.7	27.58	93509.6	85984.7	40.7	0.67	-0.57	0.104895	0.98	0.407489	1.28124	178.124	564.7	9.4
M178T659	102476	88851	53.49	205012	198467	40.98	0.5	-1	0.0206682	1.68	0.184282	1.78329	178.1	659.3	11
M178T713	181836	180523	29.32	146511	108027	97.99	1.24	0.31	0.130381	0.88	0.452467	1.04676	178.168	713.4	11.9
M178T79	1.79674e+06	1.7103e+06	33.65	2.85609e+06	2.60942e+06	35.03	0.63	-0.67	0.014763	1.83	0.158002	1.69804	177.94	78.6	1.3
M179T104	529663	438610	41.55	378485	410791	41.86	1.4	0.48	0.278632	0.55	0.636272	1.08946	178.88	103.7	1.7
M179T108	6.82452e+06	6.93704e+06	22.55	5.16457e+06	5.6737e+06	24.25	1.32	0.4	0.014763	1.83	0.158002	1.57589	179.021	108.3	1.8
M179T260	1.02293e+06	1.04289e+06	40.86	1.07512e+06	1.04469e+06	32.01	0.95	-0.07	0.95913	0.02	0.990213	0.353783	179.035	259.6	4.3
M179T303	348865	368633	18.44	437088	475297	43.12	0.8	-0.33	0.328205	0.48	0.683277	0.442737	179.046	302.6	5
M179T332	519400	563318	29.85	375817	393084	33.35	1.38	0.47	0.0281274	1.55	0.216677	1.23965	179.072	332.3	5.5
M179T445	477213	525616	31.66	436964	433641	61.53	1.09	0.13	0.798446	0.1	0.939353	0.568233	179.108	444.7	7.4
M179T492	157351	118672	108.02	327386	200563	119.55	0.48	-1.06	0.505361	0.3	0.806745	0.87266	179.083	491.9	8.2
M179T537	2.32556e+06	1.70707e+06	64.83	2.89001e+06	1.91759e+06	70.71	0.8	-0.31	0.505361	0.3	0.806745	0.556268	178.996	536.9	8.9
M179T737	2.87512e+06	3.06402e+06	25.1	3.00965e+06	2.89614e+06	19.81	0.96	-0.07	0.95913	0.02	0.990213	0.430693	179.071	737.1	12.3
M179T744	2.43252e+06	509260	183.58	2.22323e+06	2.43538e+06	69.47	1.09	0.13	0.382284	0.42	0.724699	0.739675	179.18	743.7	12.4
M179T761	3.93994e+06	3.63684e+06	29.11	7.92019e+06	8.06905e+06	47.13	0.5	-1.01	0.0206682	1.68	0.184282	1.61229	178.978	760.7	12.7
M179T765	2.283e+06	2.22902e+06	66.62	387862	233284	132.93	5.89	2.56	0.00699301	2.16	0.1064	1.77633	179.108	764.9	12.7
M179T79	1.22714e+07	1.30968e+07	37.19	1.27366e+07	1.18991e+07	34.91	0.96	-0.05	0.720901	0.14	0.912068	0.21667	178.94	78.7	1.3
M179T814	6.78555e+06	6.86483e+06	11.46	8.75641e+06	7.7475e+06	46.17	0.77	-0.37	0.720901	0.14	0.912068	0.884746	178.977	814.3	13.6
M179T90	4.68963e+07	4.67372e+07	26.6	6.28181e+07	6.16861e+07	23.05	0.75	-0.42	0.0379176	1.42	0.250052	1.4378	179.056	90.2	1.5
M180T104	703793	669062	19.01	593787	613491	9.87	1.19	0.25	0.160528	0.79	0.499935	1.47082	179.997	104.3	1.7
M180T108	6.072e+06	6.37294e+06	16.06	4.74061e+06	4.50537e+06	36.16	1.28	0.36	0.0498834	1.3	0.285686	1.49504	180.014	108.3	1.8
M180T122_1	8.28577e+06	7.78282e+06	27.38	5.11759e+06	4.31183e+06	47.34	1.62	0.7	0.014763	1.83	0.158002	1.78486	180.034	121.6	2
M180T122_2	1.45373e+08	1.50407e+08	23.77	1.41058e+08	1.3691e+08	21.04	1.03	0.04	0.720901	0.14	0.912068	0.321522	180.067	121.9	2
M180T303	580146	578672	14.62	662566	641901	25.01	0.88	-0.19	0.382284	0.42	0.724699	0.812737	180.066	303.2	5.1
M180T309	1.10678e+06	1.12977e+06	16.16	499266	458396	57.85	2.22	1.15	0.000621601	3.21	0.0444681	2.09092	180.034	309.5	5.2
M180T316	59661.9	54684.2	39.07	75780.1	66101.4	38.39	0.79	-0.35	0.382284	0.42	0.724699	1.11893	180.016	316	5.3
M180T318	653199	565333	37.38	628354	569885	37.24	1.04	0.06	0.798446	0.1	0.939353	0.0258232	180.034	317.7	5.3
M180T35	59906.1	60182.6	32.57	93627.2	116216	38.84	0.64	-0.64	0.130381	0.88	0.452467	1.27629	179.842	34.6	0.6
M180T37	121987	125062	52	156690	160326	11.02	0.78	-0.36	0.234499	0.63	0.594903	1.24924	179.936	36.9	0.6
M180T384	166746	146383	91.45	259234	74116.6	129.22	0.64	-0.64	1	0	1	0.484785	180.03	384.1	6.4
M180T391	620297	621994	33.49	618630	648737	23.5	1	0	0.95913	0.02	0.990213	0.211989	180.066	391.3	6.5
M180T426	28306.1	29891.5	51.53	35967.5	35322	46.52	0.79	-0.35	0.382284	0.42	0.724699	0.644011	180.111	426.3	7.1
M180T444	47176.8	48067.8	19.03	44015.8	44450.4	18.62	1.07	0.1	0.441803	0.35	0.767913	0.643648	180.111	444.3	7.4
M180T511	271256	238433	60.4	221393	184512	62.27	1.23	0.29	0.505361	0.3	0.806745	0.516202	180.103	511.3	8.5
M180T57	51484.8	55662.1	30.28	65426.7	59260.1	26.9	0.79	-0.35	0.382284	0.42	0.724699	1.04915	179.936	57.2	1
M180T737	265252	265309	53.48	337034	301127	58.35	0.79	-0.35	0.573737	0.24	0.844385	0.587144	180.075	736.9	12.3
M180T744	463488	474775	56.7	403650	366816	41.79	1.15	0.2	0.878477	0.06	0.966491	0.136803	180.184	743.9	12.4
M180T91	3.87698e+06	3.77546e+06	21.17	2.71863e+06	2.96398e+06	21.88	1.43	0.51	0.00699301	2.16	0.1064	1.79722	180.059	90.5	1.5
M180T99	1.10009e+08	1.09075e+08	24.41	7.59168e+07	8.06139e+07	24.13	1.45	0.54	0.0104118	1.98	0.130233	1.6685	180.034	98.9	1.6
M181T104	165621	133954	52.45	114655	106520	42.01	1.44	0.53	0.104895	0.98	0.407489	1.08445	180.879	103.7	1.7
M181T108	304075	305398	15.4	287875	274037	15.71	1.06	0.08	0.505361	0.3	0.806745	0.469038	181.017	108.3	1.8
M181T122_1	6.93178e+06	6.41887e+06	36.86	6.65036e+06	5.83905e+06	50.29	1.04	0.06	0.573737	0.24	0.844385	0.17303	181.05	122.2	2
M181T122_2	9.67392e+06	1.05136e+07	19.28	1.2396e+07	1.00969e+07	54.81	0.78	-0.36	0.798446	0.1	0.939353	0.406885	181.07	122	2
M181T143	366250	397794	35.73	415139	437223	24.32	0.88	-0.18	0.573737	0.24	0.844385	0.659077	180.9	142.8	2.4
M181T154	2.88996e+06	2.73815e+06	44.53	5.75106e+06	5.02651e+06	70.86	0.5	-0.99	0.278632	0.55	0.636272	1.14623	181.05	153.8	2.6
M181T279	364976	370208	13.7	258527	242849	46.6	1.41	0.5	0.0649573	1.19	0.325531	1.42407	181.037	278.8	4.6
M181T303	179431	168863	46.32	212229	188592	37.73	0.85	-0.24	0.328205	0.48	0.683277	0.834004	181.037	302.9	5
M181T363	341270	209155	84.41	627392	557956	38.43	0.54	-0.88	0.104895	0.98	0.407489	1.66501	181.087	363.1	6.1
M181T368	140407	142418	39.79	116073	121154	20.98	1.21	0.27	0.194872	0.71	0.545008	0.580046	180.9	368.1	6.1
M181T40	405339	415492	14.28	327056	326239	17.48	1.24	0.31	0.0281274	1.55	0.216677	1.66558	180.935	39.7	0.7
M181T51	1.89217e+06	1.90796e+06	16.69	881894	746848	74.74	2.15	1.1	0.004662	2.33	0.0886941	1.91417	180.9	51.2	0.9
M181T545	1.94736e+07	1.905e+07	38.89	1.97322e+07	1.79968e+07	50.13	0.99	-0.02	0.878477	0.06	0.966491	0.327533	180.989	545.4	9.1
M181T709	4.85866e+06	4.732e+06	25.84	3.25e+06	3.16266e+06	38.6	1.49	0.58	0.0281274	1.55	0.216677	1.73661	180.989	708.6	11.8
M181T710	349459	344801	46.02	395248	379769	29	0.88	-0.18	0.573737	0.24	0.844385	0.656911	181.16	709.7	11.8
M181T75	1.99419e+06	1.99723e+06	12.6	2.01549e+06	1.83686e+06	20.28	0.99	-0.02	0.878477	0.06	0.966491	0.0268109	180.981	75.5	1.3
M181T84	22304839	2.28947e+07	49.42	2.47274e+07	2.55313e+07	46.98	0.9	-0.15	0.720901	0.14	0.912068	0.195241	180.973	84.1	1.4
M181T87	1.83226e+06	1.75726e+06	15.57	1.91615e+06	1.78286e+06	19.77	0.96	-0.06	0.645377	0.19	0.878479	0.303219	181.029	86.7	1.4
M181T99	3.92627e+06	3.79963e+06	26.56	4.51324e+06	4.2958e+06	15.72	0.87	-0.2	0.130381	0.88	0.452467	1.13273	181.037	98.9	1.6
M182T121	4.59243e+06	4.55421e+06	29.61	1.6022e+07	1.65848e+07	67.54	0.29	-1.8	0.0206682	1.68	0.184282	1.70676	181.995	121.3	2
M182T122_1	3.70239e+07	3.49704e+07	44.81	5.03963e+07	5.09836e+07	30.64	0.73	-0.44	0.160528	0.79	0.499935	1.11427	182.013	121.7	2
M182T122_2	3.96089e+06	4.29057e+06	28.35	1.31488e+06	1.47729e+06	84.53	3.01	1.59	0.0010878	2.96	0.0513787	1.81979	182.046	121.6	2
M182T126	985027	979753	19.79	1.1269e+06	1.05452e+06	23.12	0.87	-0.19	0.278632	0.55	0.636272	0.862015	182.094	126	2.1
M182T155	1.0637e+06	1.0828e+06	25.45	1.14195e+06	1.0307e+06	18.56	0.93	-0.1	0.95913	0.02	0.990213	0.474162	182.046	154.6	2.6
M182T314_1	97808	68332.2	93.29	121602	97324.8	73.73	0.8	-0.31	0.194872	0.71	0.545008	0.79357	181.514	314.1	5.2
M182T314_2	120888	116995	47.41	154649	137240	53.83	0.78	-0.36	0.382284	0.42	0.724699	0.512767	182.01	313.7	5.2
M182T374	683691	688512	5.57	613867	637904	11.2	1.11	0.16	0.0281274	1.55	0.216677	1.64283	182.01	374.2	6.2
M182T393	1.76074e+06	1.42111e+06	40.5	1.46413e+06	1.39456e+06	61.98	1.2	0.27	0.573737	0.24	0.844385	0.828062	182.046	393.4	6.6
M182T407	141662	158843	67.56	210804	205225	84.91	0.67	-0.57	0.573737	0.24	0.844385	0.480008	182.119	407.5	6.8
M182T462	785484	693468	49.41	918690	860394	31.9	0.86	-0.23	0.278632	0.55	0.636272	0.656738	182.046	462.4	7.7
M182T477	514231	537560	17.89	513163	515005	15.47	1	0	0.878477	0.06	0.966491	0.0200662	182.01	477.4	8
M182T546	925010	958086	24.33	642608	687295	24.07	1.44	0.53	0.00699301	2.16	0.1064	1.61752	181.993	545.6	9.1
M182T549	99846.1	99258.2	18.62	89241.5	86637.4	13.16	1.12	0.16	0.278632	0.55	0.636272	0.928932	182.119	549.3	9.2
M182T66	92740.7	98800.7	45.58	85375	79941.4	65.76	1.09	0.12	0.645377	0.19	0.878479	0.339604	182.021	65.7	1.1
M182T81	8.03367e+06	8.06878e+06	24.63	1.61176e+07	1.36543e+07	37.6	0.5	-1	0.000621601	3.21	0.0444681	2.14778	182.013	80.6	1.3
M182T84	2.57e+07	2.40603e+07	31.55	2.51311e+07	2.52716e+07	6.9	1.02	0.03	0.194872	0.71	0.545008	0.0328919	181.966	84.2	1.4
M182T90	858045	828994	17.23	643627	647195	20.52	1.33	0.41	0.0104118	1.98	0.130233	1.84847	182.075	89.6	1.5
M182T99_1	3.91785e+06	3.74022e+06	31.37	3.56385e+06	3.64614e+06	64.2	1.1	0.14	0.505361	0.3	0.806745	0.657306	182.029	98.9	1.6
M182T99_2	1.60794e+06	1.00492e+06	80.42	4.793e+06	5.11943e+06	64.59	0.34	-1.58	0.0379176	1.42	0.250052	1.74221	182.049	98.9	1.6
M183T108	4.65984e+06	4.35654e+06	15.59	4.82564e+06	4.69254e+06	26.33	0.97	-0.05	0.95913	0.02	0.990213	0.0748074	183.006	107.5	1.8
M183T121	407055	391786	18.26	391590	381741	11.24	1.04	0.06	0.95913	0.02	0.990213	0.407955	182.998	121	2
M183T122	2.23405e+06	2.3354e+06	14.2	2.68301e+06	2.68293e+06	23.12	0.83	-0.26	0.0829837	1.08	0.365948	1.14169	183.016	121.7	2
M183T31	100727	88814.4	45.56	162848	160418	26.22	0.62	-0.69	0.014763	1.83	0.158002	1.83795	182.879	30.6	0.5
M183T336	783352	312354	116.76	539701	231215	121.88	1.45	0.54	0.0829837	1.08	0.365948	0.733009	183.049	335.7	5.6
M183T394	129082	81922.9	109.56	173873	114999	69.31	0.74	-0.43	0.234499	0.63	0.594903	0.91847	183.049	393.6	6.6
M183T465	665440	303382	107.32	1.25455e+06	328886	149.02	0.53	-0.91	1	0	1	0.0557371	183.104	464.7	7.7
M183T474	72219.8	54974.4	89.63	91469.5	59749.1	100.44	0.79	-0.34	0.573737	0.24	0.844385	0.166684	183.139	474.4	7.9
M183T503	2.05501e+06	1.46486e+06	116.24	2427906	1.77207e+06	106.51	0.85	-0.24	0.798446	0.1	0.939353	0.247785	183.103	503.4	8.4
M183T548	297577	134420	119.84	54703.3	51312.1	48.06	5.44	2.44	0.104895	0.98	0.407489	1.02899	183.139	547.6	9.1
M183T55_1	216715	250149	60.79	252940	260937	59.99	0.86	-0.22	0.573737	0.24	0.844385	0.391518	182.897	54.9	0.9
M183T55_2	259333	191225	64.23	145912	132568	34.4	1.78	0.83	0.278632	0.55	0.636272	1.18562	182.933	55.2	0.9
M183T576	1.27024e+08	1.24662e+08	23.75	1.20126e+08	1.2795e+08	35.41	1.06	0.08	0.95913	0.02	0.990213	0.289111	182.988	576	9.6
M183T695	1.16285e+08	1.06698e+08	56.81	6.89807e+07	4.38634e+07	105.49	1.69	0.75	0.104895	0.98	0.407489	1.23695	182.99	694.9	11.6
M183T71	175578	172421	10.02	226424	212644	27.62	0.78	-0.37	0.130381	0.88	0.452467	1.32063	182.97	71.5	1.2
M183T735	1.8788e+09	1.8224e+09	32.41	1.02639e+09	8.23981e+08	50.63	1.83	0.87	0.014763	1.83	0.158002	1.87369	182.988	735.2	12.3
M183T75_1	1.02984e+07	1.03758e+07	7.83	2.72954e+07	2.53567e+07	62.48	0.38	-1.41	0.0379176	1.42	0.250052	1.6797	182.51	75.4	1.3
M183T75_2	1.50669e+06	1.68558e+06	34.21	1.37836e+06	1.3379e+06	59.03	1.09	0.13	0.798446	0.1	0.939353	0.496284	183.011	75.3	1.3
M183T765	7.54109e+08	7.32938e+08	28.8	7.76792e+08	8.7013e+08	43.84	0.97	-0.04	1	0	1	0.191388	182.989	765.4	12.8
M183T781	9.78904e+08	8.63261e+08	47.4	1.00519e+09	1.06688e+09	28.43	0.97	-0.04	0.720901	0.14	0.912068	0.20094	182.988	781	13
M183T794	651122	419811	103.26	1.55362e+06	1.45837e+06	83.75	0.42	-1.25	0.234499	0.63	0.594903	1.01325	183.139	793.9	13.2
M183T837	3.06072e+08	3.36663e+08	35.82	3.8714e+08	3.925e+08	36.7	0.79	-0.34	0.278632	0.55	0.636272	0.954536	182.988	836.9	13.9
M183T99	6.61613e+06	6.68502e+06	16.07	5.21847e+06	5.28952e+06	21.39	1.27	0.34	0.0206682	1.68	0.184282	1.45781	183.006	98.8	1.6
M184T104	305766	308428	25.86	358390	330403	33.57	0.85	-0.23	0.328205	0.48	0.683277	0.673971	183.848	104.3	1.7
M184T107_1	7.00678e+06	6.45482e+06	41.48	8.48891e+06	9.38521e+06	40.77	0.83	-0.28	0.278632	0.55	0.636272	0.592853	184.061	106.5	1.8
M184T118	4.11967e+07	4.18769e+07	11.73	4.30217e+07	4.37533e+07	14.1	0.96	-0.06	0.645377	0.19	0.878479	0.378878	184.073	118.1	2
M184T121_2	671382	682003	24.74	638513	661841	18.68	1.05	0.07	0.573737	0.24	0.844385	0.443296	184.025	120.9	2
M184T122_1	2.15887e+06	2.50032e+06	44.94	1.52489e+06	1.34635e+06	82.67	1.42	0.5	0.130381	0.88	0.452467	0.950285	184.008	121.6	2
M184T122_2	2.64042e+06	2.30707e+06	25.19	5.20756e+06	5.31658e+06	41.47	0.51	-0.98	0.00699301	2.16	0.1064	2.02635	184.061	122.2	2
M184T148	1.16754e+06	884927	64.57	714739	627298	65.5	1.63	0.71	0.194872	0.71	0.545008	1.05299	184.062	148	2.5
M184T336	412028	268257	114.76	461889	511679	37.22	0.89	-0.16	0.160528	0.79	0.499935	0.829773	184.05	335.8	5.6
M184T373	5.21486e+06	5.18786e+06	53.03	3.99379e+06	3.35549e+06	62.68	1.31	0.38	0.278632	0.55	0.636272	0.680969	184.098	373.1	6.2
M184T374	159739	181306	36.91	226787	199511	21	0.7	-0.51	0.0829837	1.08	0.365948	1.41348	184.007	374.2	6.2
M184T407	109967	114191	33.84	80110.1	73775	45.72	1.37	0.46	0.160528	0.79	0.499935	1.15889	184.044	407	6.8
M184T463	31002.9	33139.5	24.7	31325	29878.8	29.2	0.99	-0.01	1	0	1	0.0132027	184.008	463	7.7
M184T465	285988	253900	37.81	162493	182637	49.96	1.76	0.82	0.0649573	1.19	0.325531	1.69777	184.106	464.9	7.7
M184T69	1.11736e+06	1.17557e+06	18.03	1.47737e+06	1.53087e+06	21.01	0.76	-0.4	0.0206682	1.68	0.184282	1.64441	183.996	69.2	1.2
M184T84	7.8954e+06	7.37037e+06	27.28	7.9416e+06	6.40722e+06	47.4	0.99	-0.01	0.573737	0.24	0.844385	0.30062	183.963	84.2	1.4
M185T107_4	277719	276572	12.59	282936	291987	10.73	0.98	-0.03	0.441803	0.35	0.767913	0.132399	185.078	107.4	1.8
M185T126	249381	273836	44.9	189954	170405	56.8	1.31	0.39	0.645377	0.19	0.878479	0.684142	185.057	125.5	2.1
M185T373	618904	666973	46.9	593134	574570	58.61	1.04	0.06	0.878477	0.06	0.966491	0.455374	185.101	373.1	6.2
M185T541	2.32858e+06	2.27562e+06	31.06	2.65778e+06	2.65926e+06	20.68	0.88	-0.19	0.278632	0.55	0.636272	0.747057	185.119	541.4	9
M185T562	97940.9	105722	23.56	88607	90286	15.12	1.11	0.14	0.160528	0.79	0.499935	0.467086	185.001	562	9.4
M185T597	535928	437576	48.47	905141	825926	66.54	0.59	-0.76	0.278632	0.55	0.636272	1.00313	184.984	597	9.9
M185T615	1.68658e+06	1.62701e+06	13.17	1.89497e+06	1.95766e+06	40.38	0.89	-0.17	0.382284	0.42	0.724699	0.15333	185.118	614.5	10.2
M185T70_1	629778	484752	74.09	962738	796203	49.57	0.65	-0.61	0.0829837	1.08	0.365948	1.21946	185.026	69.9	1.2
M185T70_2	495561	322307	96.52	636049	431544	88.58	0.78	-0.36	0.382284	0.42	0.724699	0.743991	185.046	69.6	1.2
M185T72	8.29201e+07	8.28899e+07	12.77	7.59992e+07	7.42308e+07	5.54	1.09	0.13	0.130381	0.88	0.452467	1.25354	184.985	72.5	1.2
M185T769	490706	541993	26.92	549259	497937	37.25	0.89	-0.16	0.95913	0.02	0.990213	0.566365	184.988	768.6	12.8
M185T784	864304	730793	40.47	745591	645520	38.6	1.16	0.21	0.505361	0.3	0.806745	0.415355	184.984	784.1	13.1
M185T82	4.04504e+06	4.57682e+06	40.06	3.75066e+06	3.89985e+06	51.98	1.08	0.11	0.645377	0.19	0.878479	0.175132	185.046	81.5	1.4
M185T88	3.41633e+06	3.65313e+06	52.97	4.3099e+06	3.47933e+06	80.44	0.79	-0.34	0.95913	0.02	0.990213	0.274884	185.022	87.6	1.5
M185T91	3.11707e+06	2.81124e+06	21.16	3.12828e+06	3.02286e+06	36.67	1	-0.01	1	0	1	0.220345	185.046	90.8	1.5
M185T95	1.21053e+06	1.2034e+06	17.66	1.44315e+06	1.4352e+06	19.03	0.84	-0.25	0.130381	0.88	0.452467	1.18027	185.093	95.4	1.6
M185T97	884599	785725	47.66	1.33247e+06	1.15959e+06	70.38	0.66	-0.59	0.382284	0.42	0.724699	0.334783	185.022	96.8	1.6
M185T99	1.18055e+06	1.17516e+06	11.32	1.3714e+06	1.40076e+06	5.73	0.86	-0.22	0.004662	2.33	0.0886941	2.00024	185.003	98.7	1.6
M186T105	186129	184600	15.23	152789	145804	13.58	1.22	0.28	0.0281274	1.55	0.216677	1.72264	185.845	105	1.8
M186T110	728129	547078	92.89	584550	273306	89.02	1.25	0.32	0.878477	0.06	0.966491	0.000332992	186.041	109.7	1.8
M186T118	820002	816636	13.1	1.17095e+06	1.12564e+06	16.23	0.7	-0.51	0.0001554	3.81	0.0365579	2.22177	186.077	117.9	2
M186T119	743779	737280	5.88	761610	761191	7.86	0.98	-0.03	0.382284	0.42	0.724699	0.403081	186.041	119	2
M186T128	58569.7	57785.9	17.55	29007.7	33536.6	53.57	2.02	1.01	0.0001554	3.81	0.0365579	2.00722	185.947	127.9	2.1
M186T279	964080	877279	34.12	1.10331e+06	1.02856e+06	32.43	0.87	-0.19	0.328205	0.48	0.683277	0.573968	186.113	279.1	4.7
M186T286	181021	192247	33.96	166215	157529	33.16	1.09	0.12	0.505361	0.3	0.806745	0.237129	185.947	286.2	4.8
M186T303	238878	238280	54.07	185193	181948	23.25	1.29	0.37	0.441803	0.35	0.767913	0.433564	185.947	302.8	5
M186T32	59773.9	54280.7	52.42	52181.8	50322.7	45.24	1.15	0.2	0.573737	0.24	0.844385	0.257866	185.963	31.8	0.5
M186T348	23700.2	23299.3	13.27	28247.7	25776.1	30.6	0.84	-0.25	0.194872	0.71	0.545008	1.11247	186.023	348.3	5.8
M186T361	2.58088e+06	1.99775e+06	58.12	1.09708e+07	1.11227e+07	69.47	0.24	-2.09	0.0104118	1.98	0.130233	1.90198	186.114	360.9	6
M186T363	160372	146587	33.8	189610	178547	42.24	0.85	-0.24	0.278632	0.55	0.636272	0.624288	186.056	363.2	6.1
M186T374_1	11713.9	10960.7	65.21	157116	121909	101.45	0.07	-3.75	0.130381	0.88	0.452467	1.51161	185.947	373.8	6.2
M186T374_2	808771	850066	30.5	1.43322e+06	1.378e+06	27.64	0.56	-0.83	0.0018648	2.73	0.0601903	2.0602	186.113	374.4	6.2
M186T463	446618	441221	9.37	402669	398515	16.51	1.11	0.15	0.194872	0.71	0.545008	1.32335	186.114	463.1	7.7
M186T547	221278	200217	45.88	342547	393187	35.22	0.65	-0.63	0.0379176	1.42	0.250052	1.0098	186.121	547.3	9.1
M186T615	187712	185878	23.42	220576	230678	32.92	0.85	-0.23	0.160528	0.79	0.499935	0.358545	186.121	614.6	10.2
M186T715	563244	612656	35.01	695531	704907	15.1	0.81	-0.3	0.194872	0.71	0.545008	1.05697	186.113	714.7	11.9
M186T72	2.57355e+06	1.76531e+06	78.12	1.32265e+06	1.48214e+06	53.93	1.95	0.96	0.278632	0.55	0.636272	1.14749	185.989	72.4	1.2
M187T102	193475	167566	39.4	162523	172876	63.55	1.19	0.25	0.645377	0.19	0.878479	0.861589	186.983	101.5	1.7
M187T113	711495	726543	48.08	888167	895552	28.44	0.8	-0.32	0.328205	0.48	0.683277	0.922282	187.025	113.4	1.9
M187T118	2.64674e+06	2.81271e+06	33.21	1.41657e+06	1.39352e+06	60.18	1.87	0.9	0.0206682	1.68	0.184282	1.52207	187.109	117.6	2
M187T128	104328	112952	46.5	95393.5	108821	52.42	1.09	0.13	0.798446	0.1	0.939353	0.308986	186.934	128	2.1
M187T148	499336	420168	63	397139	407436	24.23	1.26	0.33	0.573737	0.24	0.844385	0.567837	187.061	147.8	2.5
M187T194	328562	303765	23.32	501968	405694	59.64	0.65	-0.61	0.104895	0.98	0.407489	1.23796	187.109	194.4	3.2
M187T256	1.80471e+07	1.62824e+07	37.31	1.50715e+07	1.43844e+07	46.08	1.2	0.26	0.278632	0.55	0.636272	0.789685	187.097	256.3	4.3
M187T303_1	118848	121235	11.51	128094	128099	7.35	0.93	-0.11	0.194872	0.71	0.545008	1.12727	186.934	302.8	5
M187T303_2	629485	484361	66.81	533707	426167	69.65	1.18	0.24	0.328205	0.48	0.683277	0.445235	187.061	303.1	5.1
M187T35	71653.4	73320.4	11.94	80735.2	85306.5	12.93	0.89	-0.17	0.0498834	1.3	0.285686	1.23971	186.866	34.8	0.6
M187T361	535844	597864	32.16	978187	845885	41.6	0.55	-0.87	0.004662	2.33	0.0886941	1.76566	187.117	360.7	6
M187T406	24722.8	11166.8	101.58	58084.7	63425.8	53.44	0.43	-1.23	0.0498834	1.3	0.285686	1.41898	187.007	406	6.8
M187T472	3.57375e+06	2.07727e+06	143.35	9.39722e+06	494136	159.36	0.38	-1.39	0.505361	0.3	0.806745	0.331199	187.007	471.6	7.9
M187T516	842885	881909	21.28	966824	951093	14.27	0.87	-0.2	0.278632	0.55	0.636272	1.08787	187.134	515.8	8.6
M187T70	2.11796e+06	2.12882e+06	4.88	1.82014e+06	2.03612e+06	29.07	1.16	0.22	0.573737	0.24	0.844385	1.18944	187.025	70	1.2
M187T84_1	897826	852015	28.04	1.00221e+06	1.00585e+06	21.21	0.9	-0.16	0.278632	0.55	0.636272	0.776211	186.918	83.6	1.4
M187T84_2	279818	301738	46.88	275023	335862	47.63	1.02	0.02	1	0	1	0.0691387	187.022	83.8	1.4
M187T92	220958	257807	57.39	804066	616613	64.73	0.27	-1.86	0.0018648	2.73	0.0601903	1.94538	187.001	91.5	1.5
M187T94	3.39598e+06	3.38912e+06	17.56	2.83394e+06	2.55699e+06	20.41	1.2	0.26	0.0379176	1.42	0.250052	1.34671	187.072	93.9	1.6
M187T96	749434	735452	11.43	643324	632332	14.27	1.16	0.22	0.0498834	1.3	0.285686	1.53146	187.12	96.3	1.6
M187T97	214456	225686	30.9	229600	231291	19.74	0.93	-0.1	0.798446	0.1	0.939353	0.581269	187.024	97.3	1.6
M188T116	142798	138689	14.02	143772	146375	6.65	0.99	-0.01	0.573737	0.24	0.844385	0.144851	188.039	116.4	1.9
M188T118	110151	110372	17.85	108301	116491	18.37	1.02	0.02	1	0	1	0.209422	188.112	117.6	2
M188T126	3.50832e+06	3.62649e+06	26.24	4.07975e+06	3.71174e+06	34.63	0.86	-0.22	0.720901	0.14	0.912068	0.764434	187.941	126.3	2.1
M188T157	1.84e+06	1.80745e+06	15.66	2.53075e+06	2.56639e+06	15.71	0.73	-0.46	0.0010878	2.96	0.0513787	2.18663	187.942	156.6	2.6
M188T257	1.14851e+06	1.14434e+06	37.16	1.15193e+06	915059	52.7	1	0	0.573737	0.24	0.844385	0.152309	188.098	257.5	4.3
M188T297	173384	165853	22.97	171443	166429	29.81	1.01	0.02	0.798446	0.1	0.939353	0.0373798	188.002	296.8	4.9
M188T301	2.72459e+06	2.45118e+06	23.41	3.96381e+06	3.71095e+06	27.6	0.69	-0.54	0.014763	1.83	0.158002	1.8461	188.093	300.6	5
M188T303	4.84776e+06	5.32732e+06	33.7	6.4624e+06	6.70814e+06	41.74	0.75	-0.41	0.194872	0.71	0.545008	0.908455	187.942	303.1	5.1
M188T31	622846	715650	50.68	627842	741658	51.9	0.99	-0.01	0.878477	0.06	0.966491	0.0927465	187.905	31.5	0.5
M188T346	55920.5	66301.4	33.97	55081.3	56018.3	32	1.02	0.02	0.878477	0.06	0.966491	0.0326305	188.02	345.5	5.8
M188T352	673602	589919	85.27	735073	109146	189.66	0.92	-0.13	0.130381	0.88	0.452467	0.814398	188.035	351.8	5.9
M188T368	294028	298044	17.94	296417	273450	32.49	0.99	-0.01	0.95913	0.02	0.990213	0.0159285	187.861	368.4	6.1
M188T37	337306	334518	10.12	339468	358903	13.93	0.99	-0.01	0.95913	0.02	0.990213	0.0909702	187.861	37	0.6
M188T384	729942	779692	42.8	402522	368653	81.83	1.81	0.86	0.0649573	1.19	0.325531	1.35261	187.86	384	6.4
M188T393	6.248e+06	6.17397e+06	16.27	5.18336e+06	5.49752e+06	28.3	1.21	0.27	0.234499	0.63	0.594903	1.20795	188.039	393.5	6.6
M188T417	820018	843191	44.34	1.60638e+06	1.5196e+06	36.33	0.51	-0.97	0.0104118	1.98	0.130233	1.81529	188.039	417.4	7
M188T472	283119	161641	105.77	475908	33883.5	160.43	0.59	-0.75	0.645377	0.19	0.878479	0.468445	188.01	471.6	7.9
M188T539	50285.4	10766.5	135.86	72895.3	10719.3	148.63	0.69	-0.54	0.720901	0.14	0.912068	0.12576	188.072	538.9	9
M188T546	200240	212532	25.4	252135	266828	23.81	0.79	-0.33	0.0649573	1.19	0.325531	1.24983	188.137	545.7	9.1
M188T55	182147	172264	16.82	197967	187093	17.86	0.92	-0.12	0.194872	0.71	0.545008	0.727544	187.861	55	0.9
M188T560	334434	316430	22.24	350013	333264	57.95	0.96	-0.07	0.878477	0.06	0.966491	0.402082	188.112	560.2	9.3
M188T601	8.5562e+06	8.23048e+06	49.46	5.85435e+06	5.88421e+06	51.68	1.46	0.55	0.234499	0.63	0.594903	1.14519	188.137	601.1	10
M188T658	5.28736e+06	4.52302e+06	40.05	1.08336e+07	1.09875e+07	35.5	0.49	-1.03	0.004662	2.33	0.0886941	2.1042	187.861	657.8	11
M188T683	1.13852e+07	1.18095e+07	28.12	1.00715e+07	9.1541e+06	59.12	1.13	0.18	0.441803	0.35	0.767913	0.784272	187.861	682.8	11.4
M188T69	6.84555e+06	6.17491e+06	38.93	4.70236e+06	4.26298e+06	34.33	1.46	0.54	0.0829837	1.08	0.365948	1.34171	187.941	68.7	1.1
M188T699	6.07327e+06	2.21859e+06	113.23	2.1615e+06	962741	125.55	2.81	1.49	0.130381	0.88	0.452467	1.37528	187.861	698.5	11.6
M188T732	2.43308e+06	2.29205e+06	47.01	3.37692e+06	3.58305e+06	22.24	0.72	-0.47	0.104895	0.98	0.407489	1.30244	187.942	732	12.2
M188T795	8.53459e+06	9.26675e+06	26.44	7.40754e+06	6.27617e+06	47.07	1.15	0.2	0.234499	0.63	0.594903	0.806577	187.942	795.1	13.3
M188T96	2.3578e+06	2.3583e+06	27.56	4.15809e+06	4.02424e+06	14.31	0.57	-0.82	0.0001554	3.81	0.0365579	2.28041	188.057	96.3	1.6
M189T107	2.50964e+06	2.51951e+06	22.27	2.42189e+06	2.29399e+06	21.82	1.04	0.05	0.505361	0.3	0.806745	0.362748	189.04	107.3	1.8
M189T111	319361	284835	57.19	561024	431766	78.04	0.57	-0.81	0.194872	0.71	0.545008	0.75883	189.096	110.9	1.8
M189T113	370582	252867	96.75	509966	458873	50.43	0.73	-0.46	0.104895	0.98	0.407489	1.02962	189.01	113	1.9
M189T121	841134	1.00904e+06	44.16	862316	957347	33.47	0.98	-0.04	0.645377	0.19	0.878479	0.283234	189.077	120.5	2
M189T122	6.09985e+06	5.84725e+06	31.01	5.80162e+06	5455001	40.45	1.05	0.07	0.573737	0.24	0.844385	0.408297	189.034	121.9	2
M189T127	300448	311316	17.34	327291	297608	26.04	0.92	-0.12	0.573737	0.24	0.844385	0.555825	189.057	127.1	2.1
M189T140	694428	676935	16.66	460669	505913	54.3	1.51	0.59	0.0649573	1.19	0.325531	1.59713	188.949	139.6	2.3
M189T257	85845.4	87140.9	27.1	75679.3	71040	17.56	1.13	0.18	0.278632	0.55	0.636272	0.67774	189.102	257	4.3
M189T284	169983	96360.6	105.21	746666	804697	83.29	0.23	-2.14	0.104895	0.98	0.407489	1.27407	188.942	284	4.7
M189T286	204286	193062	27.37	257869	197689	82.19	0.79	-0.34	0.878477	0.06	0.966491	0.0790497	189.077	285.7	4.8
M189T301_1	209857	182063	48.77	229868	184530	42.93	0.91	-0.13	0.798446	0.1	0.939353	0.308329	189.031	301.3	5
M189T301_2	78170.6	75508.5	23.2	93647.9	88139.7	21.01	0.83	-0.26	0.160528	0.79	0.499935	1.17314	189.096	300.6	5
M189T303_1	160893	149984	46.24	480453	512980	62.88	0.33	-1.58	0.0649573	1.19	0.325531	1.56247	188.942	303	5
M189T303_2	418023	430950	39.84	501969	509134	28.05	0.83	-0.26	0.441803	0.35	0.767913	0.802384	189.077	303.3	5.1
M189T31	66546.7	65585.1	14.74	62612	65779.2	14.53	1.06	0.09	0.878477	0.06	0.966491	0.654322	188.866	31.5	0.5
M189T359	9.74801e+06	1.18094e+07	39.11	5.07229e+06	4.54258e+06	56.69	1.92	0.94	0.0206682	1.68	0.184282	1.41355	188.986	359.4	6
M189T37	493365	477059	26.42	466749	447597	24.36	1.06	0.08	0.798446	0.1	0.939353	0.390658	188.934	37.2	0.6
M189T374_2	445921	458545	33.61	426117	416978	20.48	1.05	0.07	0.278632	0.55	0.636272	0.103087	189.077	374.1	6.2
M189T393	305754	299731	51.56	375408	350306	29.81	0.81	-0.3	0.328205	0.48	0.683277	0.824763	189.042	393.4	6.6
M189T417	132691	128762	45.83	133968	137458	32.62	0.99	-0.01	1	0	1	0.197648	189.042	417.4	7
M189T429	3.46672e+06	3.97042e+06	69.3	8.07398e+06	7.57342e+06	80.47	0.43	-1.22	0.160528	0.79	0.499935	0.397918	188.952	428.7	7.1
M189T472	105676	37486.3	122	205218	227295	64.48	0.51	-0.96	0.130381	0.88	0.452467	1.03592	189.003	471.6	7.9
M189T501	265662	303698	65.86	265966	188799	79.57	1	0	0.95913	0.02	0.990213	0.113537	189.113	501.2	8.4
M189T509	48852.8	54402.1	46.29	62938.4	60218.8	61.13	0.78	-0.37	0.645377	0.19	0.878479	0.334586	189.059	508.9	8.5
M189T546	1.41217e+06	1.44158e+06	47.57	928846	772376	67.87	1.52	0.6	0.130381	0.88	0.452467	1.20506	188.952	545.8	9.1
M189T601	258297	253975	41.13	486171	395306	69.36	0.53	-0.91	0.130381	0.88	0.452467	1.19194	189.139	601.3	10
M189T741	825283	702478	60.08	1.24393e+06	1.1478e+06	57.21	0.66	-0.59	0.234499	0.63	0.594903	1.21403	188.951	741	12.3
M189T79	2.57657e+06	2.57504e+06	5.09	2.60505e+06	2.60931e+06	8.2	0.99	-0.02	0.573737	0.24	0.844385	0.162917	189.052	79.1	1.3
M189T83	327762	320287	13.8	265667	236332	41.67	1.23	0.3	0.014763	1.83	0.158002	1.35455	189.005	83.5	1.4
M189T88	777678	819234	37.05	1.12998e+06	1.07215e+06	36.35	0.69	-0.54	0.234499	0.63	0.594903	1.32947	189.088	88.4	1.5
M189T95_1	1.03346e+08	1.0408e+08	14.36	7.27135e+07	7.15629e+07	14.47	1.42	0.51	0.0010878	2.96	0.0513787	2.19892	189.04	94.7	1.6
M189T95_2	2.04079e+06	2.17627e+06	21.54	2.24155e+06	2.22957e+06	13.25	0.91	-0.14	0.505361	0.3	0.806745	0.816787	189.088	95.3	1.6
M189T97	824380	828458	20	996338	1.04216e+06	24.48	0.83	-0.27	0.104895	0.98	0.407489	0.927422	189.057	96.6	1.6
M190T106	6.95888e+06	6899351	25.65	3.88377e+06	3.91604e+06	53.17	1.79	0.84	0.014763	1.83	0.158002	1.77747	190.018	106.1	1.8
M190T114	3.94856e+06	3.70033e+06	40.04	3.91855e+06	3.97971e+06	12.96	1.01	0.01	0.645377	0.19	0.878479	0.174808	190.072	114.2	1.9
M190T122	8.58067e+06	8.6218e+06	23.64	8.24899e+06	8.38014e+06	14.26	1.04	0.06	0.720901	0.14	0.912068	0.30417	190.018	121.7	2
M190T148	88643.2	61959	87.06	1.18611e+06	1.33338e+06	84.7	0.07	-3.74	0.0206682	1.68	0.184282	1.72406	190.018	148	2.5
M190T205	5.16371e+06	5.43317e+06	52.75	4.8681e+06	4.6989e+06	66.38	1.06	0.09	0.645377	0.19	0.878479	0.298655	190.055	204.8	3.4
M190T254	5.84455e+06	6.27295e+06	22.99	6.52669e+06	6.48159e+06	12.95	0.9	-0.16	0.382284	0.42	0.724699	0.873169	190.054	254.3	4.2
M190T300	464260	528593	37.83	499595	525663	22.01	0.93	-0.11	0.95913	0.02	0.990213	0.477522	190.051	300.4	5
M190T360	423723	430976	9.76	397697	368692	27.28	1.07	0.09	0.382284	0.42	0.724699	0.757777	189.99	359.6	6
M190T365	402597	417478	21.05	497716	560626	39.15	0.81	-0.31	0.0649573	1.19	0.325531	0.138753	190.091	364.7	6.1
M190T38_1	177251	190600	59.98	118346	93393	71.96	1.5	0.58	0.278632	0.55	0.636272	0.581033	189.858	37.6	0.6
M190T38_2	151444	157311	10.32	167595	174396	20.09	0.9	-0.15	0.194872	0.71	0.545008	0.697167	189.932	37.7	0.6
M190T384	132577	130702	43.32	162846	168597	40.4	0.81	-0.3	0.573737	0.24	0.844385	0.697915	189.859	384	6.4
M190T396	141570	153884	31.16	122570	157195	50.96	1.16	0.21	0.798446	0.1	0.939353	0.434308	190.062	396.4	6.6
M190T429	380897	70419.8	143.03	183851	63556.8	107.55	2.07	1.05	1	0	1	0.0846964	189.955	428.7	7.1
M190T448	54385.6	57802.6	33.41	266527	199207	89.79	0.2	-2.29	0.0649573	1.19	0.325531	1.52305	190.087	447.6	7.5
M190T478	3547.1	3639.77	64.4	11248.6	12141	64.71	0.32	-1.67	0.0379176	1.42	0.250052	1.50858	190.036	478.1	8
M190T51	2.446e+06	2.1746e+06	31.65	1.8269e+06	1.60265e+06	63.05	1.34	0.42	0.160528	0.79	0.499935	1.06392	189.932	51	0.8
M190T658	1.41586e+07	1.47705e+07	21.45	7.78559e+06	8.17814e+06	52.14	1.82	0.86	0.004662	2.33	0.0886941	1.62341	189.858	658	11
M190T682	6.03594e+06	6.42069e+06	42.02	7.22761e+06	4.94226e+06	66.39	0.84	-0.26	0.878477	0.06	0.966491	0.41163	189.858	682.2	11.4
M190T698	4.68856e+06	2.24341e+06	122.01	1.72643e+06	655264	146.24	2.72	1.44	0.0829837	1.08	0.365948	1.40333	189.858	698.4	11.6
M190T78	1.99147e+06	2.16442e+06	30.09	1.3163e+06	1.30116e+06	24.95	1.51	0.6	0.0281274	1.55	0.216677	1.73449	190.018	77.9	1.3
M190T82_1	9.71022e+06	9.66761e+06	5.6	1.35947e+07	1.27896e+07	28.63	0.71	-0.49	0.0018648	2.73	0.0601903	1.79329	189.988	81.9	1.4
M190T82_2	3.88897e+06	4.03842e+06	18.47	4.54982e+06	4.68722e+06	19.88	0.85	-0.23	0.160528	0.79	0.499935	1.08237	190.072	81.8	1.4
M191T108	5.24849e+06	5.09146e+06	15.73	5.51863e+06	5.29427e+06	10.19	0.95	-0.07	0.382284	0.42	0.724699	0.659473	191.02	107.7	1.8
M191T115	193295	200872	28.28	129720	122018	52.87	1.49	0.58	0.104895	0.98	0.407489	1.27855	191.093	114.9	1.9
M191T121	728166	714450	9.89	772103	799035	12.31	0.94	-0.08	0.234499	0.63	0.594903	0.819841	191.02	120.7	2
M191T149	163524	156804	19.9	152431	149044	14.57	1.07	0.1	0.234499	0.63	0.594903	0.649125	190.966	148.6	2.5
M191T204	211659	129847	61.99	333757	417893	47.07	0.63	-0.66	0.0206682	1.68	0.184282	1.16818	191.058	203.6	3.4
M191T255	1.34552e+06	1.40047e+06	16.26	873448	803337	33.37	1.54	0.62	0.004662	2.33	0.0886941	1.899	191.058	254.8	4.2
M191T303	340543	333011	20.38	344975	335445	22.7	0.99	-0.02	0.95913	0.02	0.990213	0.0511196	191.019	303.5	5.1
M191T360	207669	204114	18.87	222002	228457	12.12	0.94	-0.1	0.194872	0.71	0.545008	0.762836	190.982	359.5	6
M191T362	214194	214298	23.41	221024	224639	39.84	0.97	-0.05	0.573737	0.24	0.844385	0.322216	191.02	362.3	6
M191T374	544272	465495	42.99	517940	468959	41.05	1.05	0.07	0.95913	0.02	0.990213	0.224578	191.02	374.1	6.2
M191T429	1.90007e+06	1.9334e+06	20.66	2.70967e+06	2.93302e+06	72.08	0.7	-0.51	0.441803	0.35	0.767913	0.387928	190.948	428.7	7.1
M191T512	192295	210668	25.89	214163	225060	36.52	0.9	-0.16	0.234499	0.63	0.594903	0.0893363	191.071	512.3	8.5
M191T53	1.766e+07	1.58848e+07	34.24	1.60297e+07	1.32631e+07	40.48	1.1	0.14	0.328205	0.48	0.683277	0.387794	190.928	52.5	0.9
M191T549	145021	148912	19.25	118679	135195	50.25	1.22	0.29	0.505361	0.3	0.806745	1.00491	191.075	549.4	9.2
M191T70_1	1.85186e+06	1.73133e+06	17.45	2.01805e+06	2.03651e+06	16.51	0.92	-0.12	0.441803	0.35	0.767913	0.756507	190.928	70	1.2
M191T718	665055	704607	47.72	404651	424791	38.65	1.64	0.72	0.0829837	1.08	0.365948	1.2085	190.994	718.1	12
M191T725	119941	107422	35.35	119699	109546	21.53	1	0	0.645377	0.19	0.878479	0.128322	191.074	725.2	12.1
M191T766	2.72459e+06	3.0271e+06	40	2.67414e+06	2.67592e+06	44.78	1.02	0.03	1	0	1	0.0799407	191.108	765.6	12.8
M191T786	6.26364e+06	6.73916e+06	38.36	5.83563e+06	4.72199e+06	69.34	1.07	0.1	0.573737	0.24	0.844385	0.542907	191.108	786.3	13.1
M191T79	4.3042e+06	4.33879e+06	12.88	4.09201e+06	4.14407e+06	9.28	1.05	0.07	0.278632	0.55	0.636272	0.564882	190.952	78.8	1.3
M191T81_1	2.23843e+07	3.82289e+06	156.05	2.64245e+07	2.06106e+07	116.47	0.85	-0.24	0.573737	0.24	0.844385	0.714319	191.02	80.9	1.3
M191T81_2	8.35164e+06	8.3804e+06	4.81	8.40216e+06	8.18391e+06	8.23	0.99	-0.01	0.878477	0.06	0.966491	0.150614	191.056	81.3	1.4
M191T89	3.16452e+07	2.65205e+07	77.67	4.95256e+07	6.02761e+07	54.85	0.64	-0.65	0.104895	0.98	0.407489	0.884501	191.02	88.6	1.5
M191T95_1	794468	835335	27.9	725420	733292	38.59	1.1	0.13	0.720901	0.14	0.912068	0.32757	191.045	94.8	1.6
M191T95_2	1.88571e+06	2.0514e+06	36.34	1.59141e+06	1.58766e+06	84.25	1.18	0.24	0.573737	0.24	0.844385	0.892441	191.073	95.4	1.6
M192T106	185464	195788	34.86	232719	275193	50.35	0.8	-0.33	0.278632	0.55	0.636272	0.216298	192.014	106.1	1.8
M192T122	1.28864e+07	1.55624e+07	58.41	9.74327e+06	1.17628e+07	70.9	1.32	0.4	0.382284	0.42	0.724699	0.390762	192.034	121.6	2
M192T204	165610	137778	62.81	184207	197340	41.66	0.9	-0.15	0.720901	0.14	0.912068	0.609796	192.05	203.5	3.4
M192T361	4.9476e+06	5.1847e+06	38.4	1.50915e+06	857121	101.31	3.28	1.71	0.0010878	2.96	0.0513787	2.02846	192.066	361.4	6
M192T373	8.52083e+06	8.05567e+06	17.69	1.0329e+07	1.00453e+07	13.72	0.82	-0.28	0.0281274	1.55	0.216677	1.56364	192.067	372.5	6.2
M192T429	289594	271586	47.93	274444	252450	44.77	1.06	0.08	1	0	1	0.111651	191.952	429.4	7.2
M192T439	442621	303762	75.05	574695	354690	86.75	0.77	-0.38	0.505361	0.3	0.806745	0.484955	192.066	438.9	7.3
M192T57	973504	764074	75.58	831771	675116	45.58	1.17	0.23	0.878477	0.06	0.966491	0.0982065	191.932	56.5	0.9
M192T70	6.74678e+06	6.94395e+06	55.73	8.13487e+06	5.41421e+06	82.67	0.83	-0.27	0.798446	0.1	0.939353	0.0861967	192.023	70.2	1.2
M192T85	2.06166e+08	2.10931e+08	22.21	2.87658e+08	2.82543e+08	25.73	0.72	-0.48	0.0498834	1.3	0.285686	1.52464	191.994	85.1	1.4
M193T108	6.61544e+06	6.59112e+06	2.42	6.72216e+06	6.79457e+06	4.17	0.98	-0.02	0.278632	0.55	0.636272	0.661626	193.035	107.5	1.8
M193T121	1.07829e+06	1.10001e+06	41.45	1.59033e+06	1.59665e+06	45.24	0.68	-0.56	0.130381	0.88	0.452467	0.971991	193.037	121.3	2
M193T31	97117.1	90874.9	25.47	138328	143397	27.23	0.7	-0.51	0.0379176	1.42	0.250052	1.7072	192.911	31.1	0.5
M193T320	62346.1	60331.1	30.85	63453.8	60296.6	24.58	0.98	-0.03	0.798446	0.1	0.939353	0.272344	192.975	320.1	5.3
M193T361	216404	187434	107	459132	108321	143.81	0.47	-1.09	1	0	1	0.455052	193.07	361.4	6
M193T372	1.16029e+06	1.05469e+06	26.89	1.42899e+06	1.43694e+06	29.72	0.81	-0.3	0.130381	0.88	0.452467	1.0125	193.07	372.5	6.2
M193T399	1.45719e+06	1.30829e+06	41.76	1.40987e+06	1.24148e+06	57.65	1.03	0.05	0.95913	0.02	0.990213	0.245922	193.086	399.4	6.7
M193T429	926958	805402	77.22	844866	811052	68.6	1.1	0.13	0.878477	0.06	0.966491	0.112374	192.946	428.8	7.1
M193T522	812696	765260	53.91	755720	638119	45.94	1.08	0.1	0.573737	0.24	0.844385	0.0262069	192.989	522.4	8.7
M193T532	1.26372e+06	848754	78.23	929263	663392	71.27	1.36	0.44	0.328205	0.48	0.683277	0.6261	193.1	531.6	8.9
M193T55	3.69829e+06	3.80843e+06	20.52	3.62598e+06	4.00936e+06	37.66	1.02	0.03	1	0	1	0.239019	192.929	54.9	0.9
M193T580	489635	502647	24.68	320980	251592	68.26	1.53	0.61	0.0498834	1.3	0.285686	1.46696	192.989	580.1	9.7
M193T70	1.07801e+06	1.06993e+06	8.73	1.22956e+06	1.23925e+06	17.33	0.88	-0.19	0.160528	0.79	0.499935	1.15169	193.024	70.3	1.2
M193T723	243601	246612	21.29	274451	243184	36.62	0.89	-0.17	0.95913	0.02	0.990213	0.273597	193.124	722.5	12
M193T754	1.72574e+06	1.16106e+06	87.13	2.8479e+06	1.79276e+06	85.38	0.61	-0.72	0.234499	0.63	0.594903	1.0277	193.087	754.3	12.6
M193T791	478232	251242	103.33	327604	189122	78.37	1.46	0.55	0.278632	0.55	0.636272	0.586675	193.087	791	13.2
M193T85	1.05848e+07	9.28842e+06	65.8	9.363e+06	6.98871e+06	60.79	1.13	0.18	0.798446	0.1	0.939353	0.360901	192.998	85.1	1.4
M194T107	362217	403628	38.84	454925	444758	25.3	0.8	-0.33	0.278632	0.55	0.636272	0.845142	194.039	107.4	1.8
M194T108	5.74152e+07	4.96089e+07	27.39	5.63483e+07	5.23837e+07	26.9	1.02	0.03	0.95913	0.02	0.990213	0.0695106	194.013	107.7	1.8
M194T120	1.21539e+08	1.20801e+08	41.61	130790737	1.26605e+08	27.27	0.93	-0.11	0.798446	0.1	0.939353	0.570031	194.013	120.5	2
M194T122	5.74006e+07	5.59792e+07	46.21	5.24548e+07	5.32827e+07	16.06	1.09	0.13	0.720901	0.14	0.912068	0.145962	194.049	121.7	2
M194T155	352573	356924	30.75	351240	355193	22.62	1	0.01	0.95913	0.02	0.990213	0.036617	194.049	155.2	2.6
M194T193	110193	108147	13.65	117258	119254	12.81	0.94	-0.09	0.328205	0.48	0.683277	0.686916	194.05	192.9	3.2
M194T334	154137	86158.2	91.19	166320	96619.3	98.8	0.93	-0.11	0.878477	0.06	0.966491	0.0259301	194.046	334.1	5.6
M194T372	171532	124527	96.25	506273	600038	69.27	0.34	-1.56	0.0829837	1.08	0.365948	1.33927	194.082	372.2	6.2
M194T379	875643	901730	50.94	547733	601719	70.46	1.6	0.68	0.130381	0.88	0.452467	1.15099	194.094	379.3	6.3
M194T400	85354	77285.7	32.1	89291	86364.9	20.04	0.96	-0.07	0.0829837	1.08	0.365948	0.421991	194.09	399.7	6.7
M194T450	416451	438270	50.68	367231	384498	50.68	1.13	0.18	0.720901	0.14	0.912068	0.366406	194.082	450.5	7.5
M194T455	345346	100770	165	464759	371176	104.31	0.74	-0.43	0.798446	0.1	0.939353	0.209067	194.046	455	7.6
M194T532	79876	80244.2	27.97	61471.1	52724.1	57.73	1.3	0.38	0.104895	0.98	0.407489	0.952612	194.103	531.6	8.9
M194T540	107472	108756	65.83	151607	141395	90.8	0.71	-0.5	0.441803	0.35	0.767913	0.405324	194.118	539.6	9
M194T601	325024	295042	30.29	399548	332114	46.48	0.81	-0.3	0.505361	0.3	0.806745	0.517747	193.987	600.6	10
M194T640	348860	350359	19.61	422986	431107	23.84	0.82	-0.28	0.104895	0.98	0.407489	1.0242	194.082	639.9	10.7
M194T806	6.79334e+06	2.01802e+06	193.37	3.41373e+06	2.74262e+06	88.67	1.99	0.99	0.878477	0.06	0.966491	0.123098	194.082	805.9	13.4
M194T85	9.23618e+06	9451298	13.58	1.13788e+07	9.71603e+06	35.24	0.81	-0.3	0.573737	0.24	0.844385	0.811577	193.991	85.1	1.4
M194T93	1.65978e+07	1.45791e+07	67.34	2.39895e+07	2.49809e+07	35.67	0.69	-0.53	0.278632	0.55	0.636272	1.09645	194.103	92.8	1.5
M194T97	5.27947e+06	5567366	28.98	5.35908e+06	5.1681e+06	27.21	0.99	-0.02	0.720901	0.14	0.912068	0.092234	194.013	97	1.6
M195T108	2.14371e+06	2.06012e+06	25.61	1.6036e+06	1.72109e+06	54.63	1.34	0.42	0.382284	0.42	0.724699	1.12923	195.016	107.7	1.8
M195T120	7.7524e+06	7.62724e+06	19.56	6.52841e+06	6.78193e+06	12.14	1.19	0.25	0.194872	0.71	0.545008	1.43183	195.016	120.2	2
M195T122	2.52438e+06	2.21645e+06	42.04	3.02482e+06	3.00329e+06	65.24	0.83	-0.26	0.720901	0.14	0.912068	0.189669	195.053	121.9	2
M195T303	286638	271473	14.54	264593	273227	30.17	1.08	0.12	0.95913	0.02	0.990213	0.699859	195.078	303.2	5.1
M195T31	2.53105e+06	2.52613e+06	11.81	2.35664e+06	2.37339e+06	12.08	1.07	0.1	0.234499	0.63	0.594903	0.916478	194.905	31.1	0.5
M195T513	165349	189703	55.09	193279	150348	82.25	0.86	-0.23	0.720901	0.14	0.912068	0.293331	195.114	512.9	8.5
M195T528	4.38045e+06	4.01417e+06	35.77	2.26498e+06	2.03961e+06	97.1	1.93	0.95	0.0498834	1.3	0.285686	1.49512	195.102	527.8	8.8
M195T564	186279	117230	93.74	159863	129342	76.07	1.17	0.22	0.95913	0.02	0.990213	0.08582	195.139	563.9	9.4
M195T59	327704	329918	5.05	369066	371866	7.75	0.89	-0.17	0.004662	2.33	0.0886941	2.0316	194.904	58.6	1
M195T668	207410	203484	41.9	231910	185097	62.89	0.89	-0.16	0.95913	0.02	0.990213	0.2042	195.139	667.6	11.1
M195T74	4.28555e+06	3.70333e+06	57.99	8.18977e+06	7.32914e+06	44.01	0.52	-0.93	0.0206682	1.68	0.184282	1.63656	194.928	73.9	1.2
M195T760_1	2.86446e+06	2.7949e+06	47.16	2.83282e+06	3.11108e+06	25.19	1.01	0.02	0.878477	0.06	0.966491	0.0739562	194.989	759.5	12.7
M195T760_2	3.46532e+06	3.29739e+06	41.02	5.39416e+06	5.58335e+06	42.11	0.64	-0.64	0.0649573	1.19	0.325531	1.31992	195.139	760	12.7
M195T768	2.65749e+06	796227	108.43	1.62757e+06	1.09025e+06	108.99	1.63	0.71	0.573737	0.24	0.844385	0.489699	194.989	767.9	12.8
M195T775	3.54365e+06	2.16326e+06	137.01	4.69316e+06	2.92238e+06	89.52	0.76	-0.41	0.382284	0.42	0.724699	0.785198	195.139	775.2	12.9
M195T79	1.04929e+09	1.10668e+09	22.19	8.97663e+08	8.39261e+08	51.69	1.17	0.23	0.573737	0.24	0.844385	0.908869	194.946	78.7	1.3
M195T814	1.29732e+07	1.29479e+07	41.87	1.07552e+07	9.2751e+06	38.02	1.21	0.27	0.505361	0.3	0.806745	0.416912	194.989	813.9	13.6
M195T82	6.65778e+07	5.38641e+07	54.77	8.99733e+07	8.88648e+07	50.59	0.74	-0.43	0.278632	0.55	0.636272	0.88325	195.051	81.5	1.4
M195T93	1.47569e+06	1.57782e+06	34.32	1.69217e+06	1.60644e+06	36.56	0.87	-0.2	0.720901	0.14	0.912068	0.576817	195.107	92.8	1.5
M195T94	2.50267e+07	2.26347e+07	30.93	2.35308e+07	2.22102e+07	23.49	1.06	0.09	1	0	1	0.150132	195.044	94.2	1.6
M196T101	8.98586e+07	8.24261e+07	38.86	1.28804e+08	1.43657e+08	36.56	0.7	-0.52	0.160528	0.79	0.499935	1.22817	196.028	101.3	1.7
M196T108	1.69165e+06	1.72412e+06	7.49	1.74035e+06	1.75836e+06	7.18	0.97	-0.04	0.441803	0.35	0.767913	0.660792	196.008	107.7	1.8
M196T122	3.07081e+06	2.87102e+06	55.01	3.8206e+06	3.37192e+06	54.29	0.8	-0.32	0.441803	0.35	0.767913	0.610216	196.045	121.7	2
M196T137	441623	472405	29.94	464859	496482	29	0.95	-0.07	0.798446	0.1	0.939353	0.3018	195.811	137.3	2.3
M196T151	1.02692e+06	1.08211e+06	24.12	903790	897767	22.1	1.14	0.18	0.234499	0.63	0.594903	0.710319	196.012	150.6	2.5
M196T191	939335	1.04723e+06	54.57	997259	1.02448e+06	37.85	0.94	-0.09	1	0	1	0.381494	196.073	190.8	3.2
M196T282	472098	459012	15.39	460994	461706	11.51	1.02	0.03	0.95913	0.02	0.990213	0.20567	196.073	281.6	4.7
M196T31	366147	347477	25.53	446074	362699	62.04	0.82	-0.28	0.878477	0.06	0.966491	0.483215	195.905	31.1	0.5
M196T387_1	378967	383986	8.42	437380	438128	15.76	0.87	-0.21	0.104895	0.98	0.407489	1.42174	196.011	386.6	6.4
M196T387_2	244567	245420	41.12	196984	186320	71.15	1.24	0.31	0.382284	0.42	0.724699	0.74678	196.098	386.6	6.4
M196T528	371213	264434	91.63	147718	151105	42.17	2.51	1.33	0.160528	0.79	0.499935	0.779181	196.106	527.9	8.8
M196T659	848703	172855	136.66	1.24874e+06	564131	125.29	0.68	-0.56	0.382284	0.42	0.724699	0.877581	195.811	659	11
M196T672	2.11873e+06	2.16525e+06	38.89	1.93984e+06	1.80685e+06	31.36	1.09	0.13	0.878477	0.06	0.966491	0.27679	195.811	671.9	11.2
M196T684	3.65042e+06	3.83729e+06	46.25	3.25968e+06	3.42061e+06	39.64	1.12	0.16	0.878477	0.06	0.966491	0.274945	195.811	684.1	11.4
M196T704	6.30521e+06	6.78765e+06	54.79	8.53095e+06	8.53341e+06	44.09	0.74	-0.44	0.382284	0.42	0.724699	0.894207	195.811	703.5	11.7
M196T721	2.20418e+07	2.1305e+07	33.71	1.16828e+07	1.10571e+07	37.5	1.89	0.92	0.004662	2.33	0.0886941	1.81051	195.811	721.2	12
M196T748	2.0108e+07	2.00064e+07	28.76	1.13188e+07	7.86236e+06	79.54	1.78	0.83	0.0379176	1.42	0.250052	1.70992	195.811	748	12.5
M196T75	2.49866e+07	2.55122e+07	7.79	2.43276e+07	2.44002e+07	7.37	1.03	0.04	0.441803	0.35	0.767913	0.656261	195.992	74.9	1.2
M196T760	452087	464353	42.51	709750	728768	24.91	0.64	-0.65	0.0104118	1.98	0.130233	1.54901	196.142	760	12.7
M196T79	4.48997e+06	3.67103e+06	67.11	6.81905e+06	5.55802e+06	47.41	0.66	-0.6	0.160528	0.79	0.499935	1.10717	195.951	78.7	1.3
M196T798	1.14507e+06	1.23387e+06	34.91	944750	953181	17.74	1.21	0.28	0.194872	0.71	0.545008	0.697517	195.811	797.7	13.3
M196T89	934068	882229	48.62	1.25622e+06	845017	53.71	0.74	-0.43	0.505361	0.3	0.806745	0.703056	196.074	89.5	1.5
M196T90	2.97063e+06	2.65075e+06	34.93	3.39353e+06	2.99905e+06	60.46	0.88	-0.19	0.95913	0.02	0.990213	0.0791552	196.023	90.2	1.5
M196T94	1.28036e+06	1.25164e+06	40.59	730320	682690	39.06	1.75	0.81	0.0379176	1.42	0.250052	1.65225	196.048	94.2	1.6
M197T101	3.11548e+06	2.79705e+06	30.28	2.67242e+06	2.52304e+06	22.2	1.17	0.22	0.328205	0.48	0.683277	0.765025	197.032	101.4	1.7
M197T119	321628	308949	33.56	228224	232348	42.04	1.41	0.49	0.0649573	1.19	0.325531	1.18798	197.012	118.6	2
M197T142	202541	184607	31.25	208327	202881	22.68	0.97	-0.04	0.441803	0.35	0.767913	0.176099	196.894	142	2.4
M197T285	248085	252594	9.67	231028	229614	6.7	1.07	0.1	0.130381	0.88	0.452467	1.25432	197.022	285	4.8
M197T31	180645	149894	34.53	213063	119031	103.54	0.85	-0.24	0.234499	0.63	0.594903	0.305775	196.895	31.1	0.5
M197T525	418953	440938	31.03	397269	369514	42.99	1.05	0.08	0.878477	0.06	0.966491	0.415099	197.02	525.1	8.8
M197T563	1.68874e+06	1.23705e+06	56.83	1.09422e+06	968294	31.53	1.54	0.63	0.130381	0.88	0.452467	1.25402	196.984	562.6	9.4
M197T69	5.7907e+07	6.37605e+07	39.43	3.75703e+07	3.38767e+07	49.25	1.54	0.62	0.130381	0.88	0.452467	1.29319	196.976	69.4	1.2
M197T74	659164	637835	25.41	529368	480025	24.53	1.25	0.32	0.0649573	1.19	0.325531	1.15982	196.923	73.7	1.2
M197T75	547085	439217	39.4	491774	440410	26.25	1.11	0.15	0.798446	0.1	0.939353	0.447071	196.995	75	1.2
M197T752	928618	268837	115.13	1.69668e+06	823309	119.44	0.55	-0.87	0.278632	0.55	0.636272	0.697434	197.118	752.1	12.5
M197T79	2.6055e+07	2.60675e+07	12.78	3.00245e+07	3.17465e+07	33.7	0.87	-0.2	0.441803	0.35	0.767913	0.365288	196.951	78.7	1.3
M197T82_1	440060	429386	31.74	577968	418214	70.19	0.76	-0.39	0.95913	0.02	0.990213	0.413919	197.032	81.7	1.4
M197T836	5.73114e+07	4.98276e+07	45.26	5.13213e+07	5.41439e+07	38.53	1.12	0.16	0.95913	0.02	0.990213	0.51762	197.155	836	13.9
M197T91	4.68438e+06	4.55849e+06	20.78	6.63262e+06	5.67442e+06	61.05	0.71	-0.5	0.278632	0.55	0.636272	1.14926	197.067	90.8	1.5
M198T114	728977	732174	51.27	1.32059e+06	737555	114.09	0.55	-0.86	0.878477	0.06	0.966491	0.140184	198.089	113.6	1.9
M198T125	1.00188e+06	912563	28.47	1.21953e+06	1.08357e+06	39.37	0.82	-0.28	0.720901	0.14	0.912068	0.916105	198.075	125.2	2.1
M198T214	465047	485849	24.45	299374	311279	22.47	1.55	0.64	0.0104118	1.98	0.130233	1.90481	198.077	214.1	3.6
M198T243	286117	304928	46.59	277864	227217	80	1.03	0.04	0.441803	0.35	0.767913	0.255052	198.041	243	4
M198T31	36632	41627.6	66.44	26310.2	10412.6	101.31	1.39	0.48	0.278632	0.55	0.636272	0.838538	197.857	30.9	0.5
M198T374	4.27437e+08	3.77893e+08	53.72	1.85194e+08	1.52184e+08	44.35	2.31	1.21	0.0029526	2.53	0.0725285	1.91639	198.033	374.1	6.2
M198T385	358848	312999	40.12	320312	315439	15.02	1.12	0.16	0.95913	0.02	0.990213	0.454382	197.808	384.9	6.4
M198T459	179986	181681	40.39	199640	222584	54.94	0.9	-0.15	0.798446	0.1	0.939353	0.173523	198.04	458.8	7.6
M198T475	148579	146954	47.33	129171	157432	58.07	1.15	0.2	0.798446	0.1	0.939353	0.518027	198.114	475.2	7.9
M198T487	369833	270244	72.92	206403	118493	93.5	1.79	0.84	0.130381	0.88	0.452467	1.1836	198.114	486.8	8.1
M198T540	451202	401854	44.44	285320	239885	57.27	1.58	0.66	0.160528	0.79	0.499935	1.32041	198.056	540	9
M198T658	4.62954e+06	3.65245e+06	78.88	2.87069e+06	3.69938e+06	74.32	1.61	0.69	0.573737	0.24	0.844385	0.598989	197.808	658.3	11
M198T684	3.24544e+06	2.82414e+06	42.8	4.61531e+06	4.15614e+06	56.27	0.7	-0.51	0.382284	0.42	0.724699	0.90019	197.808	684.3	11.4
M198T69	3.56433e+06	3.32724e+06	78.89	2.15562e+06	2.12314e+06	69.78	1.65	0.73	0.573737	0.24	0.844385	0.53628	197.979	69.4	1.2
M198T704	6.91121e+06	7.63445e+06	31.91	1.40093e+07	1.32049e+07	57.02	0.49	-1.02	0.104895	0.98	0.407489	1.62607	197.808	703.8	11.7
M198T722	1.25482e+07	1.30984e+07	54.18	1.72143e+07	1.7938e+07	15.2	0.73	-0.46	0.0649573	1.19	0.325531	1.40346	197.808	721.7	12
M198T75	886209	846486	31.83	872609	804312	34	1.02	0.02	1	0	1	0.134664	197.515	74.5	1.2
M198T798	1.65428e+06	1.33975e+06	55.18	2.51999e+06	2.14191e+06	56.88	0.66	-0.61	0.0829837	1.08	0.365948	1.20914	197.808	797.6	13.3
M198T82_1	528442	465505	90.69	741300	396288	133.52	0.71	-0.49	0.798446	0.1	0.939353	0.060176	197.808	81.7	1.4
M198T836	3.11938e+06	3.26614e+06	33.71	4.5593e+06	4.93342e+06	37.6	0.68	-0.55	0.194872	0.71	0.545008	1.27927	198.158	836.2	13.9
M198T84	9.15217e+06	8.98081e+06	68.3	6.25636e+06	5.98389e+06	67.46	1.46	0.55	0.328205	0.48	0.683277	0.552277	197.94	84.3	1.4
M198T90	492074	468223	17.79	542602	565563	44.97	0.91	-0.14	0.505361	0.3	0.806745	0.104299	198.071	90	1.5
M198T94_1	3.56799e+06	3.22238e+06	31.85	3.23389e+06	3.56994e+06	30.47	1.1	0.14	0.798446	0.1	0.939353	0.684329	198.037	94.3	1.6
M198T94_2	1.16655e+07	1.19063e+07	21.71	1.05254e+07	1.06517e+07	9.63	1.11	0.15	0.328205	0.48	0.683277	0.770792	198.049	94.3	1.6
M199T100	3.69332e+06	3.20146e+06	32.86	3.24323e+06	2.9712e+06	31.36	1.14	0.19	0.382284	0.42	0.724699	0.645107	199.072	99.8	1.7
M199T102	1.47176e+06	1.62375e+06	61.76	3.67859e+06	3.72033e+06	46.05	0.4	-1.32	0.014763	1.83	0.158002	1.56491	199.037	101.7	1.7
M199T108	312115	312418	6.44	234362	248511	56.85	1.33	0.41	0.441803	0.35	0.767913	1.21607	199.109	108.2	1.8
M199T111	593773	455674	99.09	935925	877091	39.22	0.63	-0.66	0.278632	0.55	0.636272	1.45166	199.073	111.5	1.9
M199T119	414991	400710	31.54	287941	293536	25.52	1.44	0.53	0.0281274	1.55	0.216677	1.6403	199.024	119	2
M199T142	37673.1	37338.1	12.44	43281.1	45559.1	31.09	0.87	-0.2	0.130381	0.88	0.452467	0.492012	199.002	141.5	2.4
M199T303	185687	204863	52.83	129459	131838	25.83	1.43	0.52	0.130381	0.88	0.452467	0.577029	199.024	303.4	5.1
M199T310	83245.3	76912.6	24.61	120715	130050	29.87	0.69	-0.54	0.0281274	1.55	0.216677	1.45685	199.007	310	5.2
M199T374	2.24757e+07	2.10028e+07	27.56	1.66219e+07	1.83252e+07	46.5	1.35	0.44	0.234499	0.63	0.594903	1.18314	199.036	374.1	6.2
M199T517	49244.5	49928.8	19.54	38659.7	40183.9	20.48	1.27	0.35	0.0206682	1.68	0.184282	1.40819	199.007	517.1	8.6
M199T539	1.85895e+06	1.71759e+06	20.8	1.99853e+06	2.13865e+06	26.42	0.93	-0.1	0.278632	0.55	0.636272	0.0978567	199.134	539.2	9
M199T572	1.30067e+06	1.3425e+06	15.15	887189	1.18796e+06	67.76	1.47	0.55	0.160528	0.79	0.499935	1.23189	199.097	572.4	9.5
M199T641	1.64034e+06	1.20723e+06	53.1	2.365e+06	2.47694e+06	18.83	0.69	-0.53	0.130381	0.88	0.452467	1.6042	199.134	640.9	10.7
M199T69_1	3.00813e+06	1.5171e+06	108.04	4.01126e+06	3.18713e+06	76.58	0.75	-0.42	0.278632	0.55	0.636272	0.843953	198.972	69.4	1.2
M199T69_2	7.98139e+06	8.04916e+06	12.18	8.45013e+06	8.32592e+06	3.76	0.94	-0.08	0.0829837	1.08	0.365948	1.05212	199.001	69.1	1.2
M199T743	2.4698e+06	2.4529e+06	38.36	2.43018e+06	1.89251e+06	53.78	1.02	0.02	0.878477	0.06	0.966491	0.340125	199.017	742.9	12.4
M199T754	262375	232085	29.31	280621	259127	50.52	0.93	-0.1	0.95913	0.02	0.990213	0.0661935	199.17	754.2	12.6
M199T76	2.03555e+06	1.56412e+06	68.49	5.49415e+06	4.46558e+06	84.42	0.37	-1.43	0.0498834	1.3	0.285686	1.23356	199.001	76.4	1.3
M199T84	5.20721e+06	4.54863e+06	64.54	7.35281e+06	6.8089e+06	28.91	0.71	-0.5	0.130381	0.88	0.452467	1.37116	199.033	84.4	1.4
M200T100	749957	745212	18.24	823807	720394	38.72	0.91	-0.14	0.645377	0.19	0.878479	0.287175	200.068	99.6	1.7
M200T104	57499.5	59379.7	39.77	57579.1	59596.2	33.3	1	0	0.878477	0.06	0.966491	0.174457	200.093	104	1.7
M200T108	351524	284305	64.33	328777	295834	42.22	1.07	0.1	0.95913	0.02	0.990213	0.016207	200.033	107.6	1.8
M200T122	2.11641e+06	1.95208e+06	31.33	3.87974e+06	3.93358e+06	36.36	0.55	-0.87	0.014763	1.83	0.158002	2.03077	200.056	122.2	2
M200T140	135480	140176	14.87	143774	154962	19.2	0.94	-0.09	0.441803	0.35	0.767913	0.284136	199.805	139.6	2.3
M200T167	1.25655e+06	1.30772e+06	28.49	1.46083e+06	1.37488e+06	32.56	0.86	-0.22	0.505361	0.3	0.806745	0.759692	200.056	166.9	2.8
M200T31	422860	437181	15.3	388684	421254	22.52	1.09	0.12	0.95913	0.02	0.990213	0.81756	199.85	31	0.5
M200T336	91997	100445	57.12	112856	114942	43.24	0.82	-0.29	0.505361	0.3	0.806745	0.500256	200.129	335.7	5.6
M200T361	392046	357319	38.96	391470	349935	36.86	1	0	0.95913	0.02	0.990213	0.00439703	200.093	361.3	6
M200T374_1	8.66067e+07	6.74773e+07	81.68	9.24123e+07	7.93399e+07	90.4	0.94	-0.09	1	0	1	0.564147	200.03	374.1	6.2
M200T408	3.11211e+06	2.97847e+06	16.81	2.84835e+06	3.03066e+06	16.49	1.09	0.13	0.573737	0.24	0.844385	0.703932	200.093	408.4	6.8
M200T426	255894	258163	34.13	256176	245362	56.66	1	0	0.645377	0.19	0.878479	0.141068	200.129	426.1	7.1
M200T535	159488	155611	30.41	405428	446686	28.19	0.39	-1.35	0.0003108	3.51	0.040447	2.4044	200.13	535.2	8.9
M200T572	105432	90204	61.27	192903	190142	53.49	0.55	-0.87	0.0498834	1.3	0.285686	1.44743	200.101	572.4	9.5
M200T684	1.66832e+06	1.63714e+06	34.11	1.56626e+06	1.60821e+06	39.83	1.07	0.09	0.645377	0.19	0.878479	0.260192	199.805	684.2	11.4
M200T70	284814	281710	6.25	274914	266363	14.56	1.04	0.05	0.328205	0.48	0.683277	0.580125	200.004	69.6	1.2
M200T722	7.48574e+06	5.88875e+06	54.54	9.51316e+06	9.71922e+06	23.18	0.79	-0.35	0.278632	0.55	0.636272	1.18681	199.805	721.7	12
M200T748	4.7382e+06	3.68856e+06	91.83	4.25455e+06	4.73158e+06	62.87	1.11	0.16	0.878477	0.06	0.966491	0.34718	199.805	748.1	12.5
M200T798	141950	151849	27.04	129780	147443	28.68	1.09	0.13	0.441803	0.35	0.767913	0.443035	199.805	797.7	13.3
M200T82	4.06171e+06	3.9244e+06	58.71	3.55063e+06	3.15375e+06	60.92	1.14	0.19	0.798446	0.1	0.939353	0.318672	199.804	81.7	1.4
M200T84	3.4841e+06	3.53103e+06	20.85	2.57398e+06	2.77558e+06	37.77	1.35	0.44	0.0649573	1.19	0.325531	1.35085	199.937	84.3	1.4
M200T85	6.27548e+06	6.87429e+06	28.44	6.56939e+06	6.69053e+06	12.33	0.96	-0.07	0.798446	0.1	0.939353	0.514537	200.054	85.2	1.4
M201T104_1	228811	169728	58.41	148195	145689	43.46	1.54	0.63	0.0379176	1.42	0.250052	1.16744	201.077	104.2	1.7
M201T107	779966	846750	38.68	469700	293159	66.59	1.66	0.73	0.0498834	1.3	0.285686	1.4067	201.052	107.4	1.8
M201T109	1.15024e+07	1.14687e+07	50.33	2.10296e+07	1.76203e+07	73.83	0.55	-0.87	0.234499	0.63	0.594903	0.856743	201.135	109.3	1.8
M201T126	262510	317544	49.24	248265	232296	49.51	1.06	0.08	0.573737	0.24	0.844385	0.179066	201.124	126	2.1
M201T157	1.36319e+06	1.5871e+06	53.45	1.86588e+06	1.89465e+06	14.61	0.73	-0.45	0.0829837	1.08	0.365948	1.00767	201.034	157.4	2.6
M201T223	314951	285387	43.93	212241	176882	47.61	1.48	0.57	0.0649573	1.19	0.325531	1.36811	201.034	223.2	3.7
M201T303	165442	170022	9.12	175397	182404	17.83	0.94	-0.08	0.0649573	1.19	0.325531	0.464624	201.077	303.4	5.1
M201T31_2	50667.4	46834.9	30.3	62999.2	66138.4	18.22	0.8	-0.31	0.0649573	1.19	0.325531	1.38424	200.914	31.1	0.5
M201T31_3	7665.12	8164.85	38.15	6221.94	6793.44	29.49	1.23	0.3	0.160528	0.79	0.499935	0.455536	200.965	31.4	0.5
M201T369	1.3188e+06	1.31414e+06	39.92	1.69798e+06	1.59039e+06	35.95	0.78	-0.36	0.130381	0.88	0.452467	0.996343	201.113	368.6	6.1
M201T374	9.86611e+06	9.88769e+06	7.96	1.03315e+07	1.02982e+07	12.08	0.95	-0.07	0.573737	0.24	0.844385	0.581483	201.033	374	6.2
M201T408	181010	173802	31.41	210809	207053	34.7	0.86	-0.22	0.441803	0.35	0.767913	0.70839	201.096	408.5	6.8
M201T538	715373	753246	21.39	1.16258e+06	1.19258e+06	28	0.62	-0.7	0.00699301	2.16	0.1064	1.85744	201.023	537.9	9
M201T546	631868	503796	39.59	562726	522109	35.79	1.12	0.17	0.798446	0.1	0.939353	0.466522	201.113	545.9	9.1
M201T580	1.35188e+06	1.22002e+06	27.28	1.03769e+06	1.09315e+06	21.28	1.3	0.38	0.194872	0.71	0.545008	1.35613	201.15	579.8	9.7
M201T662	2.04959e+06	2.29964e+06	44.23	3.75595e+06	3.65854e+06	38.84	0.55	-0.87	0.0379176	1.42	0.250052	1.60266	201.15	662.3	11
M201T743	613457	621569	13.71	647165	615922	11.7	0.95	-0.08	0.645377	0.19	0.878479	0.701688	201.014	742.9	12.4
M201T759	484837	407220	48.6	435259	382203	40.97	1.11	0.16	0.878477	0.06	0.966491	0.3221	201.113	759.5	12.7
M201T85	3.10591e+08	3.4588e+08	46.77	2.3586e+08	2.9467e+08	63.69	1.32	0.4	0.234499	0.63	0.594903	0.864669	201.037	85.2	1.4
M201T92	2.66584e+06	2.59603e+06	7.13	2.27475e+06	2.42301e+06	29.76	1.17	0.23	0.0498834	1.3	0.285686	1.03087	201.057	91.6	1.5
M201T95	837802	714190	50.57	713036	745190	37.8	1.17	0.23	0.720901	0.14	0.912068	0.352882	201.125	95.1	1.6
M202T101	895181	916369	68.26	714783	520687	90.2	1.25	0.32	0.441803	0.35	0.767913	0.475569	202.083	100.6	1.7
M202T109	1.09847e+06	1.04509e+06	28.37	953007	930465	26.91	1.15	0.2	0.382284	0.42	0.724699	0.762105	202.139	109.3	1.8
M202T110	5.87667e+06	6.1331e+06	49.51	2.78407e+06	3.37431e+06	66.32	2.11	1.08	0.0281274	1.55	0.216677	1.51359	202.072	109.8	1.8
M202T122_1	1.88302e+07	1.81821e+07	34.92	1.43047e+07	1.60099e+07	43.14	1.32	0.4	0.234499	0.63	0.594903	1.02056	202.018	121.9	2
M202T122_2	2.69462e+06	2.56807e+06	39.96	2.61838e+06	2.95015e+06	47.04	1.03	0.04	0.573737	0.24	0.844385	0.416637	202.108	121.9	2
M202T150	3.27292e+06	3.19944e+06	16.33	3.05054e+06	2.98144e+06	12.23	1.07	0.1	0.573737	0.24	0.844385	0.680809	202.108	149.7	2.5
M202T151	2.70924e+06	2.68031e+06	10.5	2.7594e+06	2.72217e+06	13.67	0.98	-0.03	1	0	1	0.154654	202.018	150.7	2.5
M202T304	815337	722244	48.94	1.68837e+06	1.67632e+06	56.84	0.48	-1.05	0.0104118	1.98	0.130233	1.79245	202.054	303.8	5.1
M202T31_1	65681.4	86093.9	58.06	60054.7	58469	31.92	1.09	0.13	0.573737	0.24	0.844385	0.257635	201.859	30.8	0.5
M202T319	183795	183880	24.17	266638	246087	36.73	0.69	-0.54	0.0829837	1.08	0.365948	1.49009	202.054	319.1	5.3
M202T344	8.38038e+07	8.38818e+07	36.98	1.05076e+08	8.70957e+07	73.44	0.8	-0.33	0.878477	0.06	0.966491	0.0352757	202.018	344.4	5.7
M202T364	1.49658e+06	1.44727e+06	25.24	1.27094e+06	1.2757e+06	21.92	1.18	0.24	0.328205	0.48	0.683277	0.961089	202.108	363.5	6.1
M202T374	408627	399247	31.09	490179	478905	22.41	0.83	-0.26	0.160528	0.79	0.499935	1.03118	202.035	374.1	6.2
M202T381	27588.4	22114.3	52.04	20967.1	19487.1	51.59	1.32	0.4	0.382284	0.42	0.724699	0.716302	202.062	381.1	6.4
M202T409	142211	145595	48.73	231682	231319	67.01	0.61	-0.7	0.278632	0.55	0.636272	0.751651	202.117	409.2	6.8
M202T444	2.36236e+06	2.57879e+06	38.56	1.89672e+06	2.07091e+06	24.65	1.25	0.32	0.160528	0.79	0.499935	0.741569	202.054	444.1	7.4
M202T464	705283	666239	22.22	1.09942e+06	1.12222e+06	27.81	0.64	-0.64	0.00699301	2.16	0.1064	1.90214	202.055	463.9	7.7
M202T537	253575	238511	37.32	567872	617343	24.83	0.45	-1.16	0.0018648	2.73	0.0601903	2.23975	202.01	536.6	8.9
M202T564	205662	155240	61.47	76815.5	62810.1	59.89	2.68	1.42	0.014763	1.83	0.158002	1.8261	202.11	563.5	9.4
M202T662	279511	218011	58.08	387653	342384	59.95	0.72	-0.47	0.194872	0.71	0.545008	0.687686	202.153	662.3	11
M202T85	2.16938e+07	2.24965e+07	21.73	4.22706e+07	4.38275e+07	29.43	0.51	-0.96	0.0010878	2.96	0.0513787	2.27037	202.041	85.2	1.4
M202T88	2.75697e+06	2.5747e+06	26.26	2.28429e+06	2.16151e+06	21.7	1.21	0.27	0.194872	0.71	0.545008	1.06407	202.013	87.8	1.5
M203T105	976334	965446	16.33	1.11632e+06	1.17216e+06	28.73	0.87	-0.19	0.441803	0.35	0.767913	0.620851	203.093	105	1.8
M203T110	200836	166347	50.24	369136	289848	73.26	0.54	-0.88	0.130381	0.88	0.452467	1.04001	203.075	110.3	1.8
M203T114	122491	112515	19.62	77230.4	82083.1	48.26	1.59	0.67	0.0379176	1.42	0.250052	1.58745	203.093	113.8	1.9
M203T122_2	1.15907e+06	1.35732e+06	55.88	1.39191e+06	1.56715e+06	46.79	0.83	-0.26	0.505361	0.3	0.806745	0.385127	203.049	121.7	2
M203T132	6.79718e+06	6.63891e+06	11.53	5.89892e+06	5.88939e+06	12.61	1.15	0.2	0.0379176	1.42	0.250052	1.50329	203.049	132.4	2.2
M203T171	1.60573e+06	1.69704e+06	12.31	1.28895e+06	1.31159e+06	27.3	1.25	0.32	0.0649573	1.19	0.325531	1.46306	203.049	170.9	2.8
M203T303_1	82147.1	77424	15.98	77434.4	76865.5	13.76	1.06	0.09	0.645377	0.19	0.878479	0.618903	203.057	303.5	5.1
M203T31_2	26865.4	22128.9	43.64	28070.2	26803	33.34	0.96	-0.06	0.720901	0.14	0.912068	0.299212	202.929	31.3	0.5
M203T344	7.0982e+06	7.25841e+06	26.47	9.82138e+06	9.61962e+06	33.91	0.72	-0.47	0.104895	0.98	0.407489	1.26999	203.021	344.3	5.7
M203T363	1.1369e+08	1.30946e+08	43.26	1.35683e+08	1.44219e+08	35.98	0.84	-0.26	0.278632	0.55	0.636272	0.721934	203.082	362.9	6
M203T372	2.38884e+06	2.48338e+06	48.7	3.38242e+06	2.34793e+06	94.56	0.71	-0.5	1	0	1	0.420208	203.111	372.4	6.2
M203T378	1.15007e+06	1.18024e+06	36.4	1.4261e+06	1.41919e+06	12.71	0.81	-0.31	0.160528	0.79	0.499935	1.05464	203.082	377.6	6.3
M203T388	120933	119567	30.63	189020	153396	53.19	0.64	-0.64	0.0829837	1.08	0.365948	1.35418	203.129	388.2	6.5
M203T409	7715.34	8490.04	35.54	8284.01	9523.99	49.86	0.93	-0.1	0.720901	0.14	0.912068	0.0672695	203.002	408.8	6.8
M203T444	344200	320832	60.64	421185	348522	47.08	0.82	-0.29	0.441803	0.35	0.767913	0.860708	203.057	444.1	7.4
M203T457	72552.4	70983.2	16.33	76166.2	75745.5	15.71	0.95	-0.07	0.573737	0.24	0.844385	0.532576	203.002	456.8	7.6
M203T503	522952	473367	26.96	263884	283059	23.48	1.98	0.99	0.0003108	3.51	0.040447	2.36648	203.129	502.8	8.4
M203T546	675511	433347	114.26	330785	206604	110.71	2.04	1.03	0.505361	0.3	0.806745	0.466319	203.129	546.1	9.1
M203T570	433819	422957	28.19	419135	413874	18.78	1.04	0.05	0.720901	0.14	0.912068	0.229874	203.129	569.9	9.5
M203T70	1.02314e+06	1.00873e+06	9.04	890583	882604	14.17	1.15	0.2	0.0498834	1.3	0.285686	1.5452	203.02	69.9	1.2
M203T81	4.60245e+06	4.25656e+06	57.82	5.67533e+06	6.31141e+06	40.24	0.81	-0.3	0.382284	0.42	0.724699	0.862332	203.067	80.6	1.3
M203T82_1	1.90593e+06	1.9184e+06	13.57	2.41272e+06	2.30976e+06	14.79	0.79	-0.34	0.0029526	2.53	0.0725285	1.96981	203.056	82.5	1.4
M203T82_2	831054	823208	29.91	748641	718872	28.06	1.11	0.15	0.505361	0.3	0.806745	0.457513	203.104	81.8	1.4
M203T85	4.98002e+06	4.01212e+06	46.05	4.97567e+06	4.28444e+06	33.35	1	0	0.573737	0.24	0.844385	0.0409927	203.042	85.2	1.4
M203T86	3.11003e+06	3.24615e+06	56.14	3.83325e+06	4.07768e+06	56.99	0.81	-0.3	0.798446	0.1	0.939353	0.37274	203.005	86.4	1.4
M203T87	1.84226e+06	1.9155e+06	26.09	1.85703e+06	1.99611e+06	24.87	0.99	-0.01	0.95913	0.02	0.990213	0.0682634	203.02	86.8	1.4
M204T106	962578	867036	34.81	1.09508e+06	1.01826e+06	29.3	0.88	-0.19	0.328205	0.48	0.683277	0.852702	204.088	106.4	1.8
M204T122	3.50336e+06	3.79761e+06	21.82	4.35767e+06	4.15248e+06	20.4	0.8	-0.31	0.0829837	1.08	0.365948	1.28641	204.034	121.7	2
M204T132	583921	411726	91.31	646362	473106	55.15	0.9	-0.15	0.278632	0.55	0.636272	0.610711	204.053	132.4	2.2
M204T155	58038.1	59337.8	17.06	46313.7	42154.1	29.97	1.25	0.33	0.0379176	1.42	0.250052	1.33748	204.07	154.9	2.6
M204T265	1.48002e+06	1.37973e+06	26.93	1.71706e+06	1.76282e+06	22.75	0.86	-0.21	0.194872	0.71	0.545008	0.830785	204.034	265.1	4.4
M204T286	4.23887e+06	4.21794e+06	15.26	1.63259e+06	1.45474e+06	90.13	2.6	1.38	0.0003108	3.51	0.040447	1.73358	204.033	285.6	4.8
M204T301	673381	723414	49.76	425315	331240	62.34	1.58	0.66	0.160528	0.79	0.499935	1.14004	204.033	301.4	5
M204T303	191244	186666	8.22	233525	230110	16.45	0.82	-0.29	0.0104118	1.98	0.130233	1.76102	203.937	302.9	5
M204T344	5.20356e+06	5.3384e+06	19.46	4.55938e+06	4.57486e+06	11.27	1.14	0.19	0.234499	0.63	0.594903	1.14261	204.014	344.3	5.7
M204T349	556011	600886	50.81	511151	587115	38.68	1.09	0.12	0.798446	0.1	0.939353	0.0343283	204.124	349.2	5.8
M204T363	3.08953e+07	2.99992e+07	28.17	1.82723e+07	1.80773e+07	78.24	1.69	0.76	0.104895	0.98	0.407489	1.41169	204.086	362.9	6
M204T372	189061	205989	28.17	202684	178276	33.94	0.93	-0.1	0.798446	0.1	0.939353	0.262235	204.113	372.4	6.2
M204T374	64523.1	60331.9	58.03	92015.3	105397	36.67	0.7	-0.51	0.160528	0.79	0.499935	0.939206	203.937	374.1	6.2
M204T444	82393.4	100295	51.09	68376.5	49893	89.15	1.2	0.27	0.573737	0.24	0.844385	0.404431	204.05	444.1	7.4
M204T447	188501	182531	45.68	173497	151177	53.01	1.09	0.12	0.645377	0.19	0.878479	0.496378	204.066	447	7.4
M204T473	82319.7	89248.5	29.96	80094.5	83032.9	17.45	1.03	0.04	0.573737	0.24	0.844385	0.138371	204.132	473.2	7.9
M204T476	8086.38	7667.24	15.18	11206.5	11906	23.52	0.72	-0.47	0.0104118	1.98	0.130233	1.78034	204.016	476.1	7.9
M204T67	37173.2	26082.4	62.73	50434	52103.3	47.21	0.74	-0.44	0.441803	0.35	0.767913	0.645003	203.937	67.4	1.1
M204T69	708174	668128	56.63	630779	613600	51.12	1.12	0.17	0.798446	0.1	0.939353	0.166584	204.015	69	1.1
M204T76	1.48963e+06	1.42982e+06	11.73	1.31348e+06	1.38635e+06	20.84	1.13	0.18	0.234499	0.63	0.594903	1.14112	204.051	75.9	1.3
M204T82	1.59821e+07	1.62245e+07	9.14	1.5398e+07	1.49474e+07	10.84	1.04	0.05	0.441803	0.35	0.767913	0.522904	204.004	81.9	1.4
M204T93	1.16917e+06	1.14058e+06	40.33	724007	717566	41.34	1.61	0.69	0.104895	0.98	0.407489	1.36639	204.124	93.1	1.6
M205T121	1.78467e+06	1.56223e+06	25.61	2.60894e+06	2.71688e+06	22.27	0.68	-0.55	0.00699301	2.16	0.1064	1.91572	205.036	121.2	2
M205T150	7.80843e+06	5.9498e+06	49.61	2.51453e+06	1.55018e+06	121.34	3.11	1.63	0.004662	2.33	0.0886941	1.81667	205.035	149.6	2.5
M205T171	1.60727e+06	1.60744e+06	13.97	1.51282e+06	1.60928e+06	29.27	1.06	0.09	0.95913	0.02	0.990213	0.56043	205.035	170.9	2.8
M205T334	112715	69643	73.42	117978	56402.5	101.58	0.96	-0.07	0.505361	0.3	0.806745	0.358711	204.981	334	5.6
M205T344	538630	508818	20.85	371577	261715	63.08	1.45	0.54	0.0649573	1.19	0.325531	1.52012	205.017	344.3	5.7
M205T363	1.17883e+06	1.12881e+06	39.22	1.08397e+06	1.16487e+06	33.86	1.09	0.12	0.798446	0.1	0.939353	0.336652	205.088	362.9	6
M205T505	154801	148915	21.26	145025	149191	9.45	1.07	0.09	0.720901	0.14	0.912068	0.372585	205.124	505.1	8.4
M205T525	85047.2	85971.4	12.83	81996.7	82581.4	21.58	1.04	0.05	0.720901	0.14	0.912068	0.376753	205.05	524.6	8.7
M205T546	140670	120656	49.29	175274	187616	30.22	0.8	-0.32	0.234499	0.63	0.594903	0.92501	205.054	545.5	9.1
M205T568	37678.8	43754.9	33.82	46833.1	46514	18.14	0.8	-0.31	0.234499	0.63	0.594903	0.992428	205.054	568.2	9.5
M205T581	2.31598e+06	2.50336e+06	64.21	2.94898e+06	2.92177e+06	46.99	0.79	-0.35	0.328205	0.48	0.683277	0.532189	204.946	581.1	9.7
M205T66	55110.1	24852.9	90.65	77785.5	76892.1	66.08	0.71	-0.5	0.328205	0.48	0.683277	0.745541	205.023	66	1.1
M205T69	1.2993e+06	1.29533e+06	13.06	1.4301e+06	1.36462e+06	14.41	0.91	-0.14	0.278632	0.55	0.636272	1.01525	204.999	69.4	1.2
M206T104	444732	439579	15.73	537433	520097	17.48	0.83	-0.27	0.0498834	1.3	0.285686	1.46081	206.049	103.8	1.7
M206T110	1.37605e+06	1.37437e+06	46.02	1.27982e+06	1.21413e+06	24.61	1.08	0.1	0.645377	0.19	0.878479	0.11616	206.013	109.6	1.8
M206T122	2.53139e+06	2.79092e+06	23.55	2.49471e+06	2.48848e+06	24.62	1.01	0.02	0.645377	0.19	0.878479	0.00662117	206.049	122.1	2
M206T139	1.85835e+06	2.02003e+06	69.96	2.59872e+06	2.5237e+06	46.75	0.72	-0.48	0.441803	0.35	0.767913	0.912473	206.013	139	2.3
M206T147	274937	293214	39.37	293888	277840	33.96	0.94	-0.1	0.95913	0.02	0.990213	0.342646	206.046	147.5	2.5
M206T175	903237	918042	17.97	1.02104e+06	1.03347e+06	16.26	0.88	-0.18	0.130381	0.88	0.452467	0.970431	206.013	175	2.9
M206T292	233390	228228	17.1	196512	180995	18.22	1.19	0.25	0.0649573	1.19	0.325531	1.40363	206.103	292.3	4.9
M206T384	846230	898814	92.4	1.74436e+06	501361	133.62	0.49	-1.04	0.95913	0.02	0.990213	0.257516	206.082	384	6.4
M206T513	173160	166790	20.61	167564	168478	17.17	1.03	0.05	0.878477	0.06	0.966491	0.205457	206.086	513.3	8.6
M206T550_1	410789	477148	47.01	448587	510193	49.59	0.92	-0.13	0.505361	0.3	0.806745	0.21737	205.95	549.7	9.2
M206T550_2	661543	591850	36.77	443436	398222	97.03	1.49	0.58	0.194872	0.71	0.545008	1.22937	206.065	549.5	9.2
M206T70	1.87617e+06	1.84854e+06	13.84	1.7551e+06	1.81683e+06	18.47	1.07	0.1	0.573737	0.24	0.844385	0.654185	206.038	70.4	1.2
M206T741	401615	367291	39	385028	389252	28.39	1.04	0.06	0.95913	0.02	0.990213	0.173575	206.155	741	12.3
M206T82	4.32829e+06	4.14882e+06	13.06	4.65234e+06	4.5547e+06	16.59	0.93	-0.1	0.382284	0.42	0.724699	0.819816	206.001	81.8	1.4
M206T89	1.68231e+08	1.58351e+08	27.08	1.27516e+08	1.24888e+08	38.37	1.32	0.4	0.160528	0.79	0.499935	1.18899	206.103	89.4	1.5
M207T104	2.07688e+06	2.17898e+06	18.03	1.38058e+06	1.47486e+06	32.85	1.5	0.59	0.00699301	2.16	0.1064	1.75867	207.046	103.5	1.7
M207T476	297820	270851	20.88	371674	273626	81.17	0.8	-0.32	0.95913	0.02	0.990213	0.341335	207.012	476.4	7.9
M207T524	784481	785747	35.31	931360	911545	16.48	0.84	-0.25	0.234499	0.63	0.594903	1.15486	207.103	523.6	8.7
M207T532	186496	189258	53.32	98316.6	76718.3	92.15	1.9	0.92	0.0829837	1.08	0.365948	1.28332	207.139	531.6	8.9
M207T537	114751	127291	26.49	89709.5	98763.8	36.73	1.28	0.36	0.0498834	1.3	0.285686	0.988849	207.031	537.1	9
M207T550	3.7968e+06	2.54493e+06	109.19	3.17274e+06	2.59704e+06	86.76	1.2	0.26	1	0	1	0.0568391	206.943	549.8	9.2
M207T581_1	1.13815e+06	925010	60.82	797395	512060	70.72	1.43	0.51	0.0829837	1.08	0.365948	0.946187	206.943	581.2	9.7
M207T609	295957	285946	14.79	276848	271795	35.25	1.07	0.1	0.505361	0.3	0.806745	0.708614	207.07	609.3	10.2
M207T622	390104	336886	39.83	693518	608535	44.83	0.56	-0.83	0.0104118	1.98	0.130233	1.79004	207.103	622.4	10.4
M207T70	246151	244696	16.91	216495	219405	31.52	1.14	0.19	0.382284	0.42	0.724699	0.895779	207.04	70.5	1.2
M207T75	4.95219e+06	4.43012e+06	45.2	4.08979e+06	3.97439e+06	63.81	1.21	0.28	0.573737	0.24	0.844385	0.788405	207.015	74.6	1.2
M207T754	47858.8	48388.4	42.89	46728.3	49649.8	55.76	1.02	0.03	0.878477	0.06	0.966491	0.0971782	207.175	753.7	12.6
M207T89	1.01894e+07	8.18559e+06	103.22	6.55009e+06	6.76869e+06	34.96	1.56	0.64	0.573737	0.24	0.844385	0.589543	207.107	89.5	1.5
M207T91	2.88738e+06	3.21224e+06	48.25	2.92867e+06	2.89064e+06	40.11	0.99	-0.02	0.878477	0.06	0.966491	0.0813775	207.051	91.2	1.5
M208T109	1.72704e+07	1.7238e+07	12.62	1.43063e+07	1.436e+07	14.61	1.21	0.27	0.0206682	1.68	0.184282	1.69371	208.028	109	1.8
M208T112	2.47649e+06	2.35349e+06	15.96	2.45286e+06	2.46112e+06	6.53	1.01	0.01	0.645377	0.19	0.878479	0.132019	208.072	112	1.9
M208T126	833654	931179	38.14	493402	470506	40.84	1.69	0.76	0.0379176	1.42	0.250052	1.52182	208.061	125.5	2.1
M208T152	5.59518e+06	5.7961e+06	18.63	3.34702e+06	3.84707e+06	48.1	1.67	0.74	0.0029526	2.53	0.0725285	1.46299	208.028	152.1	2.5
M208T176	562078	506564	22.27	636320	461373	60.72	0.88	-0.18	0.645377	0.19	0.878479	0.141516	208.061	176	2.9
M208T211	6.04047e+06	5.52275e+06	21.7	3.85725e+06	3.52521e+06	38.13	1.57	0.65	0.0281274	1.55	0.216677	1.76836	208.028	210.7	3.5
M208T247	3.71044e+07	2.95611e+07	53.81	1.48752e+07	7.46236e+06	111.72	2.49	1.32	0.0649573	1.19	0.325531	1.57543	208.028	247.1	4.1
M208T37	850220	846109	8.04	834539	842131	4.64	1.02	0.03	0.645377	0.19	0.878479	0.403267	207.931	37.1	0.6
M208T431	146179	120052	80.27	241387	190791	77.47	0.61	-0.72	0.278632	0.55	0.636272	0.880378	208.098	431.1	7.2
M208T495	462846	405006	41.02	437146	440950	24.58	1.06	0.08	0.95913	0.02	0.990213	0.114179	208.098	495.1	8.3
M208T498	2.17152e+06	2.07389e+06	24.73	1.77635e+06	1.70844e+06	16.69	1.22	0.29	0.104895	0.98	0.407489	1.28529	208.062	497.6	8.3
M208T585	126443	141192	49.89	68299.3	69014.3	48.05	1.85	0.89	0.104895	0.98	0.407489	1.43856	208.134	584.9	9.7
M208T623	52521.1	63826.3	48.1	73239.8	68685.1	55.76	0.72	-0.48	0.382284	0.42	0.724699	0.856641	208.106	622.6	10.4
M208T739	272469	281290	27.3	418740	427012	49.23	0.65	-0.62	0.194872	0.71	0.545008	0.856779	208.134	739.4	12.3
M208T85	8.98979e+07	8.26396e+07	45.34	5.22789e+07	3.97143e+07	54.75	1.72	0.78	0.0498834	1.3	0.285686	1.53763	207.969	85.2	1.4
M208T89	703209	780154	30.81	783958	767416	18.97	0.9	-0.16	0.573737	0.24	0.844385	0.669425	208.108	89.4	1.5
M209T100	7.91842e+06	8.03934e+06	15.08	7.43326e+06	7.75185e+06	15.11	1.07	0.09	0.645377	0.19	0.878479	0.425619	209.067	99.8	1.7
M209T108_2	789854	772924	13.27	909729	941123	25.78	0.87	-0.2	0.130381	0.88	0.452467	0.844289	209.036	107.7	1.8
M209T112	198761	191187	19.88	231330	240576	16.42	0.86	-0.22	0.130381	0.88	0.452467	1.09039	209.076	112	1.9
M209T168	228858	135594	65.72	223110	146551	70.43	1.03	0.04	0.573737	0.24	0.844385	0.205668	208.986	167.6	2.8
M209T289	2.87792e+06	2.78302e+06	15.15	1.94412e+06	2.08893e+06	59.46	1.48	0.57	0.0281274	1.55	0.216677	1.16947	209.046	289.2	4.8
M209T296	323321	324971	10.97	327288	330592	19.43	0.99	-0.02	0.878477	0.06	0.966491	0.0169036	209.093	296.2	4.9
M209T304	5.05916e+06	4.65152e+06	56.71	3.39492e+06	3.29063e+06	49.82	1.49	0.58	0.382284	0.42	0.724699	0.777868	209.045	303.6	5.1
M209T324	432730	463255	18.3	760251	740737	15.76	0.57	-0.81	0.0001554	3.81	0.0365579	2.46396	209.104	324.4	5.4
M209T334	745035	692651	35.39	787407	780891	21.14	0.95	-0.08	0.505361	0.3	0.806745	0.590511	209.104	334.1	5.6
M209T483	992464	977166	52.39	837392	709382	88.86	1.19	0.25	0.798446	0.1	0.939353	0.677273	209.118	482.9	8
M209T493	49281.9	50841.4	13.19	51038.3	52475.6	16.21	0.97	-0.05	0.573737	0.24	0.844385	0.370291	209.129	492.8	8.2
M209T525_1	129996	126298	30.28	122145	107423	64.11	1.06	0.09	0.505361	0.3	0.806745	0.417196	209.094	525.2	8.8
M209T525_2	530792	464899	29.71	511492	463788	32.27	1.04	0.05	0.878477	0.06	0.966491	0.249418	209.118	525.2	8.8
M209T535	694553	638246	48.16	724798	752532	58.42	0.96	-0.06	0.95913	0.02	0.990213	0.269096	209.118	534.8	8.9
M209T544_1	1.39459e+06	1.274e+06	57.21	713286	572438	46.22	1.96	0.97	0.0649573	1.19	0.325531	1.39848	209.118	544.1	9.1
M209T550	657315	650853	55.72	554670	481591	68.43	1.19	0.24	0.505361	0.3	0.806745	0.580517	208.941	549.8	9.2
M209T559	2.9455e+06	2.36482e+06	51.53	1.99665e+06	2.10376e+06	43.7	1.48	0.56	0.278632	0.55	0.636272	0.974536	208.984	559.3	9.3
M209T581	271414	217760	46.85	262784	218573	47.53	1.03	0.05	0.95913	0.02	0.990213	0.282116	208.94	581	9.7
M209T603_1	290850	283015	42.73	145937	138681	36.16	1.99	0.99	0.0206682	1.68	0.184282	1.80927	209.118	602.7	10
M209T603_2	233509	226172	27.38	161233	130562	52.92	1.45	0.53	0.0649573	1.19	0.325531	1.5296	209.155	603	10.1
M209T683	386214	429172	49.01	373319	355249	52.17	1.03	0.05	1	0	1	0.0669967	209.118	683.1	11.4
M209T74	1.43183e+07	1.36605e+07	22.51	1.68648e+07	1.80564e+07	44.22	0.85	-0.24	0.645377	0.19	0.878479	0.295894	209.03	73.9	1.2
M209T784	741674	676019	41.12	707273	558903	45.85	1.05	0.07	0.720901	0.14	0.912068	0.245843	209.155	783.5	13.1
M209T79	1.1947e+07	1.19073e+07	37.68	1.18747e+07	1.16982e+07	15.25	1.01	0.01	0.95913	0.02	0.990213	0.281937	208.962	78.8	1.3
M209T82_1	6.82941e+06	6.4664e+06	29.29	6.9615e+06	6.95379e+06	19.42	0.98	-0.03	0.798446	0.1	0.939353	0.251732	208.845	82.5	1.4
M209T82_2	4088963	4.31051e+06	30.28	4.2022e+06	3.85647e+06	54.08	0.97	-0.04	0.573737	0.24	0.844385	0.0380528	209.03	81.9	1.4
M209T85	1.65495e+06	2.02598e+06	50.34	1.33088e+06	1.18491e+06	52.18	1.24	0.31	0.382284	0.42	0.724699	0.362935	208.972	85.4	1.4
M209T91	3.5347e+06	3.02811e+06	40.61	4.12696e+06	2.16928e+06	104.72	0.86	-0.22	0.278632	0.55	0.636272	0.312824	209.067	91.4	1.5
M210T100	729005	818538	49.69	490898	473543	63.93	1.49	0.57	0.0829837	1.08	0.365948	0.961365	210.07	99.8	1.7
M210T108	364506	367036	44.49	389530	417041	45.21	0.94	-0.1	0.798446	0.1	0.939353	0.220379	209.989	107.6	1.8
M210T109	218132	154358	65.3	375012	474508	49.03	0.58	-0.78	0.104895	0.98	0.407489	1.25165	210.024	108.9	1.8
M210T115	206307	202470	35.99	176469	160566	34.07	1.17	0.23	0.441803	0.35	0.767913	0.680635	210.088	114.9	1.9
M210T121	2.08637e+06	2.41128e+06	49.25	3.18689e+06	3.21468e+06	54.82	0.65	-0.61	0.0829837	1.08	0.365948	0.872358	210.008	121.5	2
M210T127	2.3831e+07	2.37996e+07	21.36	2.24757e+07	2.19707e+07	17.79	1.06	0.08	0.720901	0.14	0.912068	0.408463	210.044	126.7	2.1
M210T130	306788	307294	19.45	280246	268526	22.53	1.09	0.13	0.328205	0.48	0.683277	0.630082	210.026	130.5	2.2
M210T156	776666	782603	15.75	623630	564102	23.21	1.25	0.32	0.0649573	1.19	0.325531	1.51549	209.99	156.4	2.6
M210T211	61906.7	39696.7	71.09	119923	111120	47.61	0.52	-0.95	0.0281274	1.55	0.216677	1.61679	210.024	210.6	3.5
M210T289	446280	319862	90.69	380923	267358	107.74	1.17	0.23	0.278632	0.55	0.636272	0.637896	210.049	289.1	4.8
M210T303_1	321730	336000	24.3	487552	472900	27.77	0.66	-0.6	0.00699301	2.16	0.1064	1.79813	210.049	303.5	5.1
M210T303_2	197870	151322	57.37	446471	421700	53.49	0.44	-1.17	0.014763	1.83	0.158002	1.69698	210.077	303	5
M210T321	332675	313733	12.43	312559	348705	33.66	1.06	0.09	1	0	1	0.684736	210.088	320.7	5.3
M210T326	524024	524083	28.62	324840	330900	20.1	1.61	0.69	0.0029526	2.53	0.0725285	2.03576	210.026	325.6	5.4
M210T328	478256	368053	58.39	461439	430968	32.49	1.04	0.05	0.645377	0.19	0.878479	0.304122	209.99	327.8	5.5
M210T333	248850	252661	20.7	223678	220163	28.05	1.11	0.15	0.234499	0.63	0.594903	0.75475	210.077	332.7	5.5
M210T334	18001.5	16537.9	61.78	42036.7	37389.3	53.15	0.43	-1.22	0.004662	2.33	0.0886941	1.7704	210.108	334	5.6
M210T336	3.95863e+06	3.78725e+06	45.47	3.1687e+06	3.01299e+06	30.05	1.25	0.32	0.505361	0.3	0.806745	0.724969	209.99	335.7	5.6
M210T364	5.27265e+07	5.49891e+07	44.34	7.74765e+07	7.84936e+07	24.79	0.68	-0.56	0.0498834	1.3	0.285686	1.4269	209.99	363.9	6.1
M210T376	209958	154448	109.42	554565	318318	93.59	0.38	-1.4	0.104895	0.98	0.407489	1.42885	210.077	376.3	6.3
M210T387	80493.4	75221.3	22.75	78198.4	73196.3	38.81	1.03	0.04	0.798446	0.1	0.939353	0.231177	210.041	386.7	6.4
M210T483	71532.7	25119.4	115.77	292732	276136	73.57	0.24	-2.03	0.0104118	1.98	0.130233	1.69757	210.121	482.7	8
M210T663	326022	319932	33.97	305269	288689	39.44	1.07	0.09	0.441803	0.35	0.767913	0.235053	210.049	662.5	11
M210T69	158077	161458	6.93	690296	675869	81.89	0.23	-2.13	0.0498834	1.3	0.285686	1.6092	210.008	68.6	1.1
M210T74	1.26846e+06	1.23596e+06	28.88	1.44613e+06	1.32425e+06	41.07	0.88	-0.19	0.573737	0.24	0.844385	0.457257	210.034	73.9	1.2
M210T95	6.38938e+06	6.23596e+06	27.66	7.15143e+06	6.65986e+06	29.52	0.89	-0.16	0.573737	0.24	0.844385	0.630299	210.044	94.7	1.6
M211T108	2.00631e+06	1.96016e+06	17.37	2.02528e+06	2.0449e+06	9.81	0.99	-0.01	0.505361	0.3	0.806745	0.169879	210.983	107.7	1.8
M211T125_1	1.04759e+06	1.08388e+06	25.69	382836	383315	76.67	2.74	1.45	0.0010878	2.96	0.0513787	1.80467	211.072	124.8	2.1
M211T125_2	885644	592956	111.67	892242	809104	48.86	0.99	-0.01	0.328205	0.48	0.683277	0.688145	211.109	125.2	2.1
M211T127	1.05816e+06	1.12392e+06	21.23	1.26386e+06	1.29797e+06	16.53	0.84	-0.26	0.160528	0.79	0.499935	1.32594	211.048	126.8	2.1
M211T304	278112	268434	29.33	257122	265234	15.67	1.08	0.11	0.798446	0.1	0.939353	0.302308	211.093	304.1	5.1
M211T32	36952.7	34123.3	18.7	42927	43142	20.61	0.86	-0.22	0.194872	0.71	0.545008	1.06053	210.901	31.6	0.5
M211T351	160604	167563	96.74	126452	147030	73.36	1.27	0.34	0.645377	0.19	0.878479	0.419436	210.884	350.7	5.8
M211T364	2.64481e+06	2.19485e+06	35.72	2.93031e+06	2.69664e+06	35.57	0.9	-0.15	0.573737	0.24	0.844385	0.682151	210.994	363.8	6.1
M211T38	242629	137249	122.47	281347	161017	116.32	0.86	-0.21	0.382284	0.42	0.724699	0.310131	210.884	38.1	0.6
M211T399	523461	533833	32.46	597809	571856	15.45	0.88	-0.19	0.382284	0.42	0.724699	0.900052	211.097	399.4	6.7
M211T440	99963.1	102970	72.52	143604	134632	60.6	0.7	-0.52	0.441803	0.35	0.767913	0.655796	211.025	439.8	7.3
M211T54	197424	202963	29.95	281092	252257	36.21	0.7	-0.51	0.104895	0.98	0.407489	1.3749	210.884	54.5	0.9
M211T565	1.53269e+06	1.42733e+06	56.61	1.68346e+06	1.95016e+06	54.42	0.91	-0.14	0.720901	0.14	0.912068	0.0050964	211.046	565.1	9.4
M211T616	4.34415e+06	4.48356e+06	30.34	4.64163e+06	4.71857e+06	21.59	0.94	-0.1	0.878477	0.06	0.966491	0.352061	211.134	615.7	10.3
M211T625	1.41801e+06	1.38616e+06	42.46	897112	907359	40.7	1.58	0.66	0.0498834	1.3	0.285686	1.10862	211.134	625.4	10.4
M211T653	2.43576e+06	1.9294e+06	40.46	4.31406e+06	4.02491e+06	45.38	0.56	-0.82	0.0206682	1.68	0.184282	1.56837	211.134	653.3	10.9
M211T70	4.81858e+06	4.42966e+06	47.46	5.64761e+06	3.5209e+06	85.03	0.85	-0.23	1	0	1	0.107873	210.992	70.2	1.2
M211T800	3.25611e+06	3.22804e+06	34.85	3.13876e+06	3.02993e+06	35.32	1.04	0.05	0.798446	0.1	0.939353	0.211235	211.134	799.7	13.3
M211T82	1.47325e+07	1.60376e+07	17.83	1.49658e+07	1.52011e+07	22.15	0.98	-0.02	0.720901	0.14	0.912068	0.18564	210.841	82.5	1.4
M211T90	1.18192e+06	1.12327e+06	17.56	1.71011e+06	1.45181e+06	58.66	0.69	-0.53	0.0829837	1.08	0.365948	1.2812	211.083	90.3	1.5
M212T113	62926.2	62443.4	10.88	61210.9	59577.6	9.69	1.03	0.04	0.505361	0.3	0.806745	0.398169	212.067	112.7	1.9
M212T120	7.67935e+06	7.23885e+06	36.98	2.25356e+07	1.40282e+07	79.55	0.34	-1.55	0.0281274	1.55	0.216677	1.62144	212.023	119.6	2
M212T126	40006.5	43090.7	51.85	44660.5	45263.7	28.63	0.9	-0.16	0.720901	0.14	0.912068	0.571952	212.094	126.1	2.1
M212T127	946966	873650	50.77	728793	893164	62.53	1.3	0.38	0.573737	0.24	0.844385	0.552252	212.04	126.8	2.1
M212T296	37548.7	32258.8	71.34	357232	270940	106.72	0.11	-3.25	0.194872	0.71	0.545008	1.35917	212.093	295.5	4.9
M212T304	147086	145841	22.82	131019	138216	37.28	1.12	0.17	0.573737	0.24	0.844385	0.647868	212.006	303.8	5.1
M212T346	1.89225e+06	1.39906e+06	72.88	2.43745e+06	2.25912e+06	77.1	0.78	-0.37	0.645377	0.19	0.878479	0.429483	212.093	345.9	5.8
M212T364	3.7916e+06	3.69172e+06	39.39	4.62423e+06	4.84857e+06	18.44	0.82	-0.29	0.234499	0.63	0.594903	0.936148	211.986	363.9	6.1
M212T419	4.12748e+06	3.6022e+06	96.91	3.79936e+06	2.37291e+06	91.15	1.09	0.12	0.95913	0.02	0.990213	0.0904645	212.002	419.2	7
M212T468	24741.9	20476.9	71.76	54246.6	63030.6	58.74	0.46	-1.13	0.0498834	1.3	0.285686	1.41619	212.129	468.2	7.8
M212T654	286543	215542	70.63	308449	294988	48.68	0.93	-0.11	0.645377	0.19	0.878479	0.429351	212.137	653.6	10.9
M212T763	612788	645212	37.27	848019	823622	22.75	0.72	-0.47	0.0649573	1.19	0.325531	1.37167	212.108	762.6	12.7
M212T82	2.40428e+06	2.40861e+06	38.5	1.68735e+06	1.76563e+06	47.69	1.42	0.51	0.194872	0.71	0.545008	1.12826	211.97	82	1.4
M212T90	2.61396e+06	2.46384e+06	33.41	2.26739e+06	2.17459e+06	24.95	1.15	0.21	0.505361	0.3	0.806745	0.788441	211.996	90.2	1.5
M213T103	230753	262517	47.53	319109	324942	14.19	0.72	-0.47	0.0829837	1.08	0.365948	1.33644	213.038	102.7	1.7
M213T119	100613	99432.3	11.17	88541.2	89208	17.8	1.14	0.18	0.104895	0.98	0.407489	1.24077	213.077	118.7	2
M213T127	7.79682e+06	7.84473e+06	15.68	8.53421e+06	8.90209e+06	12.78	0.91	-0.13	0.234499	0.63	0.594903	0.938754	213.125	126.8	2.1
M213T190	914107	894635	17.48	949911	884264	16.05	0.96	-0.06	0.95913	0.02	0.990213	0.329282	213.125	189.9	3.2
M213T264	175662	181978	49.23	308202	297885	18.58	0.57	-0.81	0.004662	2.33	0.0886941	1.86432	213.077	264	4.4
M213T31	133869	141589	12.47	138182	139662	12.56	0.97	-0.05	0.878477	0.06	0.966491	0.253796	212.912	31.1	0.5
M213T364	128368	109330	65.72	170740	148491	63.32	0.75	-0.41	0.441803	0.35	0.767913	0.667685	212.989	363.8	6.1
M213T387	302675	214975	57.63	227189	237408	71.82	1.33	0.41	0.573737	0.24	0.844385	0.847272	213.125	387.1	6.5
M213T419	117453	120550	46.88	239699	206754	46.41	0.49	-1.03	0.0104118	1.98	0.130233	1.56937	213.005	419.2	7
M213T448	27944	20207.8	61.49	20771.5	25754.4	56.53	1.35	0.43	0.878477	0.06	0.966491	0.846612	213.034	448.4	7.5
M213T473	306802	253429	57.21	631328	587581	51.33	0.49	-1.04	0.0498834	1.3	0.285686	1.59621	212.979	472.6	7.9
M213T483	144575	132723	33.37	109451	106947	41.88	1.32	0.4	0.234499	0.63	0.594903	0.92246	213.015	483	8.1
M213T56	222568	217588	24.89	176805	172694	27.6	1.26	0.33	0.0649573	1.19	0.325531	1.07058	212.916	56.1	0.9
M213T560	116746	108411	26	121412	123279	19.02	0.96	-0.06	0.95913	0.02	0.990213	0.37187	212.996	559.8	9.3
M213T592	168042	167759	12.27	260906	229347	36.62	0.64	-0.63	0.00699301	2.16	0.1064	1.77424	213.056	591.7	9.9
M213T656	1.22939e+06	1.2138e+06	35.94	1.18625e+06	1.26561e+06	18.98	1.04	0.05	0.878477	0.06	0.966491	0.0794351	213.15	656.1	10.9
M213T670	3.07524e+07	2.92685e+07	35.01	2.57171e+07	2.12425e+07	41.34	1.2	0.26	0.382284	0.42	0.724699	0.744621	213.149	670.3	11.2
M213T719	204443	202906	37.32	124620	106366	46.79	1.64	0.71	0.0281274	1.55	0.216677	1.57387	213.16	719.3	12
M213T732	1.36434e+06	1.34138e+06	36.19	1.70687e+06	1.52953e+06	29.43	0.8	-0.32	0.328205	0.48	0.683277	1.01948	213.15	731.8	12.2
M213T77_1	1.95182e+06	1.88355e+06	27.59	1.8046e+06	1.67545e+06	30.63	1.08	0.11	0.645377	0.19	0.878479	0.449542	212.98	76.8	1.3
M213T807	5.38438e+06	5.16594e+06	32.26	4.92134e+06	3.57351e+06	70.09	1.09	0.13	0.328205	0.48	0.683277	0.667623	213.067	807	13.4
M213T82_1	3.69524e+06	3.62457e+06	19.26	4.93135e+06	4.74259e+06	15.01	0.75	-0.42	0.0029526	2.53	0.0725285	1.98881	212.839	82.5	1.4
M213T82_2	3.35077e+06	3.35256e+06	13.6	2.50316e+06	2.61874e+06	13.6	1.34	0.42	0.000621601	3.21	0.0444681	2.10156	212.886	82	1.4
M213T84_2	6.93981e+06	7.64098e+06	37.83	8.31501e+06	7.95743e+06	70.11	0.83	-0.26	0.95913	0.02	0.990213	0.105211	213.085	83.8	1.4
M213T86	4.46723e+07	4.21006e+07	41.56	3.48874e+07	3.34373e+07	26.1	1.28	0.36	0.278632	0.55	0.636272	0.929493	213.049	86.4	1.4
M213T89	800804	810824	19.17	539507	546202	12.65	1.48	0.57	0.0029526	2.53	0.0725285	2.21073	213.037	88.6	1.5
M214T129	449282	429442	48.06	500196	498474	60.28	0.9	-0.15	0.95913	0.02	0.990213	0.201436	214.128	128.6	2.1
M214T149	628914	718128	38.98	718222	686228	28.01	0.88	-0.19	0.720901	0.14	0.912068	0.676278	214.072	149.1	2.5
M214T155	598598	590484	52.45	916160	965201	30.08	0.65	-0.61	0.0379176	1.42	0.250052	1.46351	214.072	154.9	2.6
M214T286	258254	222500	62.64	230925	159327	69.32	1.12	0.16	0.878477	0.06	0.966491	0.293669	214.072	286.4	4.8
M214T31	336492	333860	34.45	424879	454707	35.09	0.79	-0.34	0.278632	0.55	0.636272	0.918687	213.879	31.4	0.5
M214T355	103366	132463	85.97	70165.4	72842.1	90.29	1.47	0.56	0.505361	0.3	0.806745	0.00233551	214.108	354.7	5.9
M214T395	154402	166092	24.82	157750	154863	33.65	0.98	-0.03	0.95913	0.02	0.990213	0.0945013	214.072	395.4	6.6
M214T412	32356.7	30413.5	78.2	31941.9	24271.2	61.62	1.01	0.02	0.95913	0.02	0.990213	0.367054	214.018	411.8	6.9
M214T419	66206.8	71598.5	39.32	46098.6	48842.2	64.49	1.44	0.52	0.160528	0.79	0.499935	1.02487	213.998	419.2	7
M214T429	24436.9	24212.3	48.89	37744.3	39979	30.73	0.65	-0.63	0.0498834	1.3	0.285686	1.45039	214.018	429.2	7.2
M214T442	65775.1	64635	59.68	112727	75693.4	96.34	0.58	-0.78	0.505361	0.3	0.806745	0.273681	213.964	441.8	7.4
M214T482	947134	870917	66.24	740870	403386	84.69	1.28	0.35	0.382284	0.42	0.724699	0.615494	214.145	481.7	8
M214T596	93021.9	77010.4	59.04	97006.2	92998.6	61.72	0.96	-0.06	1	0	1	0.102212	214.051	596.1	9.9
M214T670	3.44786e+06	3.39342e+06	34.7	3.49159e+06	3.36472e+06	17.75	0.99	-0.02	0.95913	0.02	0.990213	0.360875	214.153	670.3	11.2
M214T678	1.70356e+06	1.77737e+06	27.76	1.79749e+06	1.67184e+06	39.49	0.95	-0.08	0.878477	0.06	0.966491	0.132317	214.153	678	11.3
M214T807	366799	379381	33.37	350906	300562	50.09	1.05	0.06	0.645377	0.19	0.878479	0.425612	214.07	807.1	13.5
M214T86	3.5823e+06	3433248	14.08	3.95086e+06	3.89286e+06	15.07	0.91	-0.14	0.104895	0.98	0.407489	1.00123	214.048	86.4	1.4
M214T92	543600	641724	42.54	1.20727e+06	1.15122e+06	40.7	0.45	-1.15	0.004662	2.33	0.0886941	1.81193	214.077	91.7	1.5
M214T94	3.85999e+06	2.27715e+06	80.62	4.78069e+06	5.08837e+06	44.91	0.81	-0.31	0.441803	0.35	0.767913	0.831236	214.023	94.3	1.6
M215T109_1	144252	166906	37.07	176107	146011	62.36	0.82	-0.29	0.878477	0.06	0.966491	0.157942	215.087	109.4	1.8
M215T109_2	131233	147762	50.29	200878	198317	5.16	0.65	-0.61	0.00699301	2.16	0.1064	1.62504	215.14	109.3	1.8
M215T113	913087	939103	24.32	489858	515725	56.62	1.86	0.9	0.0018648	2.73	0.0601903	1.52811	215.019	112.9	1.9
M215T115	3.39804e+06	3.21233e+06	20.02	3.02351e+06	3.00849e+06	90.77	1.12	0.17	0.798446	0.1	0.939353	1.08679	215.049	114.9	1.9
M215T118	923845	741019	37.96	779185	662571	65.53	1.19	0.25	0.160528	0.79	0.499935	0.771846	215.104	117.7	2
M215T157	92750.7	92332.7	33.67	89683.9	99024.8	38.12	1.03	0.05	0.645377	0.19	0.878479	0.398684	215.14	157	2.6
M215T285	193893	121989	81.3	203698	135173	92.01	0.95	-0.07	0.878477	0.06	0.966491	0.086757	215.033	284.9	4.7
M215T296	750750	620479	69.92	532139	519298	76.16	1.41	0.5	0.441803	0.35	0.767913	0.667288	215.049	296.4	4.9
M215T303	416340	328698	63.26	595476	576784	44.94	0.7	-0.52	0.194872	0.71	0.545008	1.12833	215.092	303.3	5.1
M215T31_1	167478	162758	6.45	177463	176944	11.18	0.94	-0.08	0.573737	0.24	0.844385	0.827641	214.859	30.7	0.5
M215T31_2	41635.4	36473.3	34.74	29940.1	26566.5	50.32	1.39	0.48	0.104895	0.98	0.407489	1.23266	214.88	31.5	0.5
M215T31_3	64778.2	66020.4	26.14	59203.5	57271.4	14.87	1.09	0.13	0.720901	0.14	0.912068	0.520221	214.949	31.4	0.5
M215T327	221428	224276	54.65	119224	127813	52.11	1.86	0.89	0.104895	0.98	0.407489	1.36374	215.05	326.7	5.4
M215T374	269427	272181	26.58	258799	271704	32.81	1.04	0.06	0.878477	0.06	0.966491	0.373864	215.093	374.1	6.2
M215T420	58771.6	59577.5	19.73	84662.9	81156.1	39.98	0.69	-0.53	0.0829837	1.08	0.365948	1.19236	215.083	420.4	7
M215T471	1.06355e+06	813469	81.2	304496	129791	131	3.49	1.8	0.0281274	1.55	0.216677	1.39384	215.129	470.6	7.8
M215T597	89626.6	83529.6	46.62	65140.5	61458	45.69	1.38	0.46	0.278632	0.55	0.636272	0.977681	215.144	596.6	9.9
M215T604	154029	185368	56.64	223475	173374	97.21	0.69	-0.54	1	0	1	0.283577	214.977	603.8	10.1
M215T671	314463	308599	14.67	281390	280489	10.38	1.12	0.16	0.194872	0.71	0.545008	1.19621	215.155	670.5	11.2
M215T683	1.41109e+07	1.45103e+07	31.48	1.7023e+07	1.7966e+07	35.27	0.83	-0.27	0.441803	0.35	0.767913	0.683561	215.165	682.5	11.4
M215T703	1.45581e+06	1.08991e+06	61.31	2.05591e+06	1.68343e+06	46.79	0.71	-0.5	0.234499	0.63	0.594903	1.1538	215.165	703.5	11.7
M215T72	639742	589690	20.47	852310	831952	33.36	0.75	-0.41	0.0829837	1.08	0.365948	1.16552	214.996	72	1.2
M215T738	2.77506e+06	2.6802e+06	57.1	3.03519e+06	2.47919e+06	94.25	0.91	-0.13	0.505361	0.3	0.806745	0.119073	215.051	738.2	12.3
M215T82_1	1.09067e+06	960519	47.02	909339	894047	49.25	1.2	0.26	0.645377	0.19	0.878479	0.781303	214.836	82.4	1.4
M215T83	5.18e+06	5.06953e+06	17.59	9.08822e+06	8.76544e+06	42.97	0.57	-0.81	0.0379176	1.42	0.250052	1.71679	215.032	82.6	1.4
M215T90	805713	813905	15.69	688476	652565	18.69	1.17	0.23	0.104895	0.98	0.407489	1.35948	215.005	89.7	1.5
M215T91	1.56272e+07	1.705e+07	32.1	1.61189e+07	1.61385e+07	20.36	0.97	-0.04	0.95913	0.02	0.990213	0.185109	215.033	90.6	1.5
M215T95	481216	476059	10.9	490528	485633	13.05	0.98	-0.03	0.95913	0.02	0.990213	0.152356	215.104	95.4	1.6
M216T107	142407	117102	37.78	110371	107005	28.27	1.29	0.37	0.382284	0.42	0.724699	1.09868	216.099	107.3	1.8
M216T122	1.61996e+06	1.56741e+06	14.51	1.52837e+06	1.41366e+06	33.1	1.06	0.08	0.505361	0.3	0.806745	0.567296	216.088	121.7	2
M216T153	138978	123232	48.52	260308	292673	46.43	0.53	-0.91	0.0498834	1.3	0.285686	1.37423	216.034	153.4	2.6
M216T296	62933.4	56504.4	52.81	57348.2	49663.2	50.54	1.1	0.13	0.95913	0.02	0.990213	0.398413	216.053	296	4.9
M216T304	40450.1	38543.7	26.67	42883.7	40624.8	26.12	0.94	-0.08	0.645377	0.19	0.878479	0.307741	216.088	304.1	5.1
M216T31_1	42673.2	40413.1	16.52	45910.4	40746.4	24.07	0.93	-0.11	0.95913	0.02	0.990213	0.447334	215.846	31.2	0.5
M216T31_2	138220	112274	54.9	124320	123966	6.41	1.11	0.15	0.234499	0.63	0.594903	0.158135	215.876	31.5	0.5
M216T31_3	476244	466106	12.84	475761	512916	14.08	1	0	0.878477	0.06	0.966491	0.0558703	215.935	31.4	0.5
M216T361	190516	192395	28.77	184121	174510	29.01	1.03	0.05	0.720901	0.14	0.912068	0.268226	216.034	360.9	6
M216T371	192854	196674	60.88	419255	391305	22.02	0.46	-1.12	0.0010878	2.96	0.0513787	2.0632	215.528	371	6.2
M216T398	7.19611e+06	8.22502e+06	66.06	1.14272e+07	1.00686e+07	63.92	0.63	-0.67	0.234499	0.63	0.594903	0.797717	216.033	398.2	6.6
M216T407	96742.5	96499.2	43.61	185598	159612	32.13	0.52	-0.94	0.0018648	2.73	0.0601903	1.91247	216.07	406.9	6.8
M216T408	368628	266532	72.64	291532	149187	85.8	1.26	0.34	0.234499	0.63	0.594903	0.840834	216.088	408.1	6.8
M216T471	283175	222563	44.67	197886	158134	94.94	1.43	0.52	0.0649573	1.19	0.325531	1.25099	216.132	470.6	7.8
M216T519	169448	181245	45.19	268111	215650	85.01	0.63	-0.66	0.328205	0.48	0.683277	0.493038	216.124	518.7	8.6
M216T85	2.12373e+07	2.15383e+07	17.09	2.2809e+07	2.15887e+07	21.01	0.93	-0.1	0.573737	0.24	0.844385	0.560098	216.049	84.8	1.4
M216T91_1	1.93509e+06	2.08211e+06	25.43	2.47467e+06	2.1306e+06	79.78	0.78	-0.35	0.798446	0.1	0.939353	0.0753997	216.036	90.6	1.5
M216T91_2	2.15837e+06	2.02383e+06	45.54	2.69941e+06	3.06947e+06	30.8	0.8	-0.32	0.194872	0.71	0.545008	0.910977	216.087	91.4	1.5
M216T92	490362	492387	11.22	654834	603041	25	0.75	-0.42	0.0029526	2.53	0.0725285	1.8586	216.076	91.6	1.5
M216T97	1.8029e+06	1.80726e+06	21.68	1.75134e+06	1.43903e+06	79.4	1.03	0.04	0.441803	0.35	0.767913	0.885079	216.051	97.1	1.6
M217T100	2.11528e+07	1.87101e+07	34.04	8.19035e+06	7.48716e+06	92.46	2.58	1.37	0.0010878	2.96	0.0513787	1.68851	217.083	100.1	1.7
M217T108	550926	548668	4.88	549633	551364	3.83	1	0	0.95913	0.02	0.990213	0.0385413	217.119	107.5	1.8
M217T113	52856.2	49731.8	19.91	47406.1	47529.1	20.69	1.11	0.16	0.505361	0.3	0.806745	0.771307	216.515	113.2	1.9
M217T220	21905.6	18627.4	68.13	21386.2	6058.73	146.71	1.02	0.03	0.194872	0.71	0.545008	0.964064	216.935	220	3.7
M217T236	846418	681386	62.03	777495	664156	82.49	1.09	0.12	0.720901	0.14	0.912068	0.482886	217.108	236.2	3.9
M217T303	102282	103950	24.95	115119	69699.2	84.42	0.89	-0.17	0.573737	0.24	0.844385	0.454404	217.108	303.2	5.1
M217T31_1	1.63317e+06	1.6791e+06	13.24	1.63269e+06	1.65723e+06	9.12	1	0	0.720901	0.14	0.912068	0.0204361	216.855	30.7	0.5
M217T31_2	43608.1	39619.5	22.42	36893.3	32770.5	24.28	1.18	0.24	0.104895	0.98	0.407489	1.05657	216.937	31.5	0.5
M217T368	15802.8	13394.7	31.8	25771.5	25619.7	46.62	0.61	-0.71	0.0829837	1.08	0.365948	1.30879	216.809	368.5	6.1
M217T375	552855	499548	37.81	356430	347309	39.85	1.55	0.63	0.0498834	1.3	0.285686	1.64873	217.108	374.5	6.2
M217T432_1	35949.5	23994.2	63.97	36719.8	26680.6	73.24	0.98	-0.03	0.878477	0.06	0.966491	0.0515859	217.062	432.2	7.2
M217T432_2	40219.2	39912.2	18.18	47653.6	45662.3	8.23	0.84	-0.24	0.0829837	1.08	0.365948	1.53802	217.144	431.8	7.2
M217T476	196192	206317	19.95	239388	236291	28.11	0.82	-0.29	0.130381	0.88	0.452467	0.994022	217.017	475.8	7.9
M217T531	72465	71171.6	72.09	24331.1	20759.9	74.78	2.98	1.57	0.0498834	1.3	0.285686	1.54569	216.964	531.5	8.9
M217T562	136236	135001	40.58	235326	186436	58.99	0.58	-0.79	0.160528	0.79	0.499935	1.29392	217.144	562.3	9.4
M217T574	408374	411842	40.59	549550	502044	57.12	0.74	-0.43	0.720901	0.14	0.912068	0.468108	217.05	573.6	9.6
M217T717	687956	713402	33.82	672217	631722	26.36	1.02	0.03	0.720901	0.14	0.912068	0.0137975	217.171	717.4	12
M217T85	3.98253e+07	3.14267e+07	38.8	4.97625e+07	2.62731e+07	111.3	0.8	-0.32	0.278632	0.55	0.636272	0.236785	217.011	85.1	1.4
M217T90_2	3.37955e+06	3.26767e+06	13.65	3.67085e+06	3.81098e+06	10.25	0.92	-0.12	0.160528	0.79	0.499935	1.06746	217.083	90.3	1.5
M217T91	4.71114e+06	4.59327e+06	14.55	5.24939e+06	5.31596e+06	10.65	0.9	-0.16	0.0829837	1.08	0.365948	1.24437	217.029	90.8	1.5
M217T99	367048	380312	27.93	574979	527978	33.56	0.64	-0.65	0.0206682	1.68	0.184282	1.63656	217.035	99.1	1.7
M218T106	1.2307e+06	1.20174e+06	27.4	1.34226e+06	1.49872e+06	36.44	0.92	-0.13	0.720901	0.14	0.912068	0.253116	218.013	105.5	1.8
M218T108	7.84225e+06	6.39177e+06	43.56	4.83489e+06	4.34476e+06	70.8	1.62	0.7	0.130381	0.88	0.452467	1.35489	218.067	107.5	1.8
M218T149	1.12154e+06	1.11703e+06	5.12	1.18404e+06	1.1947e+06	7.67	0.95	-0.08	0.104895	0.98	0.407489	1.2214	218.013	148.6	2.5
M218T151	3.83081e+08	3.87006e+08	19.01	1.45044e+08	1.28667e+08	80.89	2.64	1.4	0.0010878	2.96	0.0513787	1.93583	218.104	151	2.5
M218T295	936344	937786	40.93	1.07701e+06	952700	47.36	0.87	-0.2	0.798446	0.1	0.939353	0.335289	218.013	295.5	4.9
M218T303	203552	204841	6.77	230432	216508	21.03	0.88	-0.18	0.130381	0.88	0.452467	1.06909	218.101	303.1	5.1
M218T31	393038	373153	55.73	232228	214127	68.8	1.69	0.76	0.104895	0.98	0.407489	0.878174	217.853	30.7	0.5
M218T310	837852	750667	39.73	1.30251e+06	1.23216e+06	41.77	0.64	-0.64	0.0829837	1.08	0.365948	1.32951	218.013	309.7	5.2
M218T359	3.0159e+06	2.57443e+06	40.83	4.76897e+06	4.51584e+06	42.38	0.63	-0.66	0.0649573	1.19	0.325531	1.47163	218.049	359	6
M218T386	152789	149905	38.03	82724.9	54219.5	74.61	1.85	0.89	0.0379176	1.42	0.250052	1.69978	218.013	386.1	6.4
M218T393	585181	570039	27.9	511018	547168	25.85	1.15	0.2	0.720901	0.14	0.912068	0.622322	218.022	393.5	6.6
M218T403	465915	365166	45.84	1.66538e+06	1.38613e+06	75	0.28	-1.84	0.014763	1.83	0.158002	1.82433	218.082	402.8	6.7
M218T413	218145	190227	63	584906	489674	74.56	0.37	-1.42	0.104895	0.98	0.407489	1.34609	217.995	413.4	6.9
M218T500	865404	883727	26.12	896533	852162	37.06	0.97	-0.05	0.95913	0.02	0.990213	0.0219635	218.121	500.5	8.3
M218T519	75484.8	60763.6	61.64	114796	102059	52.24	0.66	-0.6	0.194872	0.71	0.545008	1.09691	218.031	519	8.7
M218T741	350678	316355	39.87	260587	153568	120.86	1.35	0.43	0.278632	0.55	0.636272	1.32855	218.126	741.3	12.4
M218T80	7.65847e+06	4.93631e+06	78.08	1.07862e+07	9.38415e+06	50.27	0.71	-0.49	0.194872	0.71	0.545008	1.01361	218.067	80.3	1.3
M218T85	3.20432e+06	2.95559e+06	31.02	6.53008e+06	3.58113e+06	81.12	0.49	-1.03	0.234499	0.63	0.594903	1.18618	218.012	85.1	1.4
M219T100	195320	176620	40.47	236533	203385	40.98	0.83	-0.28	0.382284	0.42	0.724699	0.716074	219.087	100.4	1.7
M219T107	391227	396303	16	476595	487448	45.35	0.82	-0.28	0.234499	0.63	0.594903	0.174306	219.069	106.7	1.8
M219T112	1.24236e+06	1.15175e+06	21.31	1.01588e+06	1.14272e+06	38.97	1.22	0.29	0.505361	0.3	0.806745	0.758649	219.047	112.2	1.9
M219T121	3.0473e+06	2.52812e+06	70.75	1.38529e+06	1.52732e+06	51.85	2.2	1.14	0.0281274	1.55	0.216677	1.31204	219.047	121.3	2
M219T122	7.64367e+07	7.94492e+07	16.78	7.22433e+07	7.38955e+07	16.53	1.06	0.08	0.573737	0.24	0.844385	0.394762	219.106	122.2	2
M219T149	185259	173071	18.36	196133	181396	19.64	0.94	-0.08	0.505361	0.3	0.806745	0.417949	218.992	148.6	2.5
M219T151_2	1.65916e+07	1.68021e+07	16.06	1.58695e+07	1.62005e+07	63.18	1.05	0.06	0.878477	0.06	0.966491	0.708987	219.107	151	2.5
M219T168	650952	658878	17.66	655851	673312	9.78	0.99	-0.01	1	0	1	0.154096	219.015	168.2	2.8
M219T179	417672	386244	52.36	653990	643123	66.82	0.64	-0.65	0.278632	0.55	0.636272	0.631688	219.077	179.2	3
M219T212	510712	411415	70.68	1.10145e+06	661269	105.1	0.46	-1.11	0.441803	0.35	0.767913	0.837886	219.077	212	3.5
M219T31_1	60951.8	61910.2	15.79	59765.5	56265.4	24.98	1.02	0.03	0.645377	0.19	0.878479	0.0995588	218.825	30.7	0.5
M219T31_2	200134	240279	42.68	96084.7	59775.4	67.84	2.08	1.06	0.0104118	1.98	0.130233	1.53668	218.852	30.8	0.5
M219T326	926257	649499	66.46	849241	441227	100.18	1.09	0.13	0.104895	0.98	0.407489	0.639025	219.077	326.2	5.4
M219T361	159120	164539	73.46	195210	198500	80.94	0.82	-0.29	0.878477	0.06	0.966491	0.0361526	219.077	361.2	6
M219T403	211695	192192	52.83	192887	147557	62.79	1.1	0.13	0.573737	0.24	0.844385	0.46168	219.087	402.5	6.7
M219T413	24686.5	21973.6	56.67	10871.3	9586.44	95.34	2.27	1.18	0.0281274	1.55	0.216677	1.75702	218.999	413.3	6.9
M219T476	255813	240162	45.41	190952	226178	51.44	1.34	0.42	0.441803	0.35	0.767913	0.935249	219.102	475.8	7.9
M219T501	113164	113995	29.07	164856	154284	35.38	0.69	-0.54	0.0829837	1.08	0.365948	1.40368	219.125	500.5	8.3
M219T537	268458	248880	29.32	202670	182107	31.81	1.32	0.41	0.104895	0.98	0.407489	1.20605	219.066	536.7	8.9
M219T563	2.38217e+06	2.51307e+06	27.72	2.63689e+06	2.64584e+06	16.9	0.9	-0.15	0.505361	0.3	0.806745	0.641816	218.986	562.6	9.4
M219T741	2.57194e+06	2.51646e+06	46.21	1.77802e+06	800853	129	1.45	0.53	0.194872	0.71	0.545008	1.3642	219.123	741.3	12.4
M219T83	5.07769e+06	5.25638e+06	49.63	2.93563e+06	2.6356e+06	72.05	1.73	0.79	0.104895	0.98	0.407489	1.41977	218.874	83.1	1.4
M219T85	3.5614e+06	3.18124e+06	39.09	3.72622e+06	3.42128e+06	43.95	0.96	-0.07	0.878477	0.06	0.966491	0.0949289	219.01	85.1	1.4
M219T96	5.79501e+06	5.74226e+06	58.4	6.8694e+06	6.91023e+06	55.86	0.84	-0.25	0.645377	0.19	0.878479	0.305813	219.051	96.3	1.6
M220T104	1.61246e+07	1.40403e+07	56.59	1.33494e+07	1.11957e+07	35.99	1.21	0.27	0.441803	0.35	0.767913	0.187539	220.04	103.7	1.7
M220T122_1	4.69091e+08	4.72133e+08	10.8	4.2979e+08	4.534e+08	13.17	1.09	0.13	0.234499	0.63	0.594903	0.961096	220.028	121.9	2
M220T122_2	6.40987e+06	6.27987e+06	9.95	6705846	6.47426e+06	6.09	0.96	-0.07	0.160528	0.79	0.499935	0.758197	220.107	122.2	2
M220T147	75558.5	60201.4	67.09	112450	98891.1	74.38	0.67	-0.57	0.382284	0.42	0.724699	0.512554	220.065	147.3	2.5
M220T151	7.55691e+07	7.06085e+07	12.26	8.31255e+07	8.32636e+07	14.16	0.91	-0.14	0.0649573	1.19	0.325531	1.06818	220.029	151.3	2.5
M220T287	187095	205340	43.15	173348	163380	22.3	1.08	0.11	0.194872	0.71	0.545008	0.334592	220.028	286.6	4.8
M220T33	295268	301241	7.15	286002	283420	7.65	1.03	0.05	0.382284	0.42	0.724699	0.56863	219.845	33.5	0.6
M220T366	1.2096e+06	1.26232e+06	37.66	1.58313e+06	1.49223e+06	23.44	0.76	-0.39	0.130381	0.88	0.452467	0.948093	220.098	366.1	6.1
M220T393	237731	232963	38.63	154374	94286.7	76.83	1.54	0.62	0.234499	0.63	0.594903	1.10796	220.02	393.4	6.6
M220T534	106150	105495	32.56	107071	108756	14.95	0.99	-0.01	0.878477	0.06	0.966491	0.349216	220.101	533.7	8.9
M220T545	401416	371356	33.78	394327	377446	47.18	1.02	0.03	0.95913	0.02	0.990213	0.161343	220.034	545.1	9.1
M220T620	573329	526448	56.21	552980	559705	40.21	1.04	0.05	1	0	1	0.0717006	219.984	620.4	10.3
M220T696	961252	834442	43.42	475265	376981	47.07	2.02	1.02	0.0104118	1.98	0.130233	1.83897	220.147	696.4	11.6
M220T80	4.34243e+06	4.25464e+06	16.43	4.47567e+06	4.46879e+06	14.62	0.97	-0.04	0.720901	0.14	0.912068	0.277255	219.978	80.3	1.3
M220T81	8.23093e+06	8.30668e+06	50.92	6.42258e+06	6.90824e+06	42.94	1.28	0.36	0.382284	0.42	0.724699	0.481569	220.033	81.4	1.4
M220T91	9.00522e+06	8.65793e+06	46.32	1.12823e+07	1.00039e+07	45.96	0.8	-0.33	0.441803	0.35	0.767913	0.757432	220.083	91.1	1.5
M220T98	2.93209e+06	3.06245e+06	12.37	2.69083e+06	2.7533e+06	11.72	1.09	0.12	0.160528	0.79	0.499935	0.894446	220.082	98.3	1.6
M221T104	1.30844e+06	1.24587e+06	57.77	1.28112e+06	1.04966e+06	53.19	1.02	0.03	0.878477	0.06	0.966491	0.200146	221.043	103.7	1.7
M221T108_1	784101	794785	21.56	954511	941957	18.9	0.82	-0.28	0.130381	0.88	0.452467	1.34716	220.939	107.6	1.8
M221T108_2	6.09273e+06	6.0343e+06	29.47	5.42472e+06	5.63816e+06	19.73	1.12	0.17	0.573737	0.24	0.844385	0.541409	221.03	108.4	1.8
M221T111	715766	747263	15.61	1.16041e+07	703522	181.24	0.06	-4.02	0.878477	0.06	0.966491	1.03961	221.066	110.8	1.8
M221T122	4.27417e+07	4.46209e+07	33.26	4.99364e+07	4.45273e+07	38.43	0.86	-0.22	0.645377	0.19	0.878479	0.423457	221.031	121.9	2
M221T151	5.91442e+06	5.52707e+06	13.37	6.53507e+06	6.17272e+06	18.86	0.91	-0.14	0.234499	0.63	0.594903	0.888981	221.032	151.3	2.5
M221T292	78147.4	76719.5	32.62	190356	165231	78.42	0.41	-1.28	0.278632	0.55	0.636272	1.05187	221.068	292.3	4.9
M221T303	114897	100884	63.67	102356	94289.1	57.01	1.12	0.17	0.878477	0.06	0.966491	0.137515	220.94	302.6	5
M221T312	127565	132590	23.18	137084	135486	27.04	0.93	-0.1	0.573737	0.24	0.844385	0.388577	221.068	312.1	5.2
M221T33	1.56055e+06	1.51413e+06	9.67	1.67694e+06	1.69666e+06	11.21	0.93	-0.1	0.130381	0.88	0.452467	0.9479	220.938	33.2	0.6
M221T336	317813	191323	91.34	473275	409259	68.94	0.67	-0.57	0.234499	0.63	0.594903	0.957901	221.093	336.2	5.6
M221T35	233554	226700	81.08	282085	277766	13.58	0.83	-0.27	0.328205	0.48	0.683277	1.11003	221.119	35.2	0.6
M221T367	158862	147154	45.98	183656	224594	45.74	0.86	-0.21	0.573737	0.24	0.844385	0.174302	221.101	366.6	6.1
M221T507_1	860432	326328	128.25	340342	240750	117.86	2.53	1.34	0.382284	0.42	0.724699	0.615561	221.082	506.7	8.4
M221T507_2	592387	573222	24.2	431754	470576	41.36	1.37	0.46	0.0829837	1.08	0.365948	1.16598	221.118	507.2	8.5
M221T545	318455	377015	40.51	236779	157057	69.11	1.34	0.43	0.194872	0.71	0.545008	1.11863	221.027	545.2	9.1
M221T57	3.10014e+06	3.35535e+06	57.33	2.03232e+06	1.83814e+06	43.62	1.53	0.61	0.278632	0.55	0.636272	0.594794	220.938	56.5	0.9
M221T577	839866	683471	59.41	625595	506436	65.03	1.34	0.42	0.382284	0.42	0.724699	0.702565	221.082	576.8	9.6
M221T589	377442	382868	33.8	388804	488720	50.96	0.97	-0.04	0.720901	0.14	0.912068	0.190087	221.118	589.2	9.8
M221T610	873060	756327	78.8	1.43817e+06	1.30659e+06	43.21	0.61	-0.72	0.160528	0.79	0.499935	1.41287	221.118	610.1	10.2
M221T620	112582	92152.4	39.55	287666	266104	27.5	0.39	-1.35	0.0003108	3.51	0.040447	2.44277	221.082	619.6	10.3
M221T626	610001	691280	53.65	751487	705964	85.39	0.81	-0.3	0.878477	0.06	0.966491	0.0993243	221.118	625.8	10.4
M221T68	88323.6	102354	34	99609.9	103851	39.84	0.89	-0.17	0.505361	0.3	0.806745	0.215591	221.018	67.6	1.1
M221T713	509966	500814	19.71	580996	565175	41.23	0.88	-0.19	0.441803	0.35	0.767913	0.256218	221.154	713.4	11.9
M221T723	235907	155112	86.98	262515	208383	68.09	0.9	-0.15	0.382284	0.42	0.724699	0.645781	220.984	722.6	12
M221T741	2.39864e+07	2.2887e+07	25.56	4.03785e+07	3.98109e+07	31.91	0.59	-0.75	0.014763	1.83	0.158002	1.92148	221.121	741.4	12.4
M221T784	572657	484891	51.42	429977	332573	47.88	1.33	0.41	0.278632	0.55	0.636272	0.913053	221.103	783.9	13.1
M221T826	6.09273e+06	6.75491e+06	40.26	4.92984e+06	5.29449e+06	60.89	1.24	0.31	0.441803	0.35	0.767913	0.932538	221.154	826.1	13.8
M221T83	1.96018e+06	1.49024e+06	44.14	2.38283e+06	2.07254e+06	36.9	0.82	-0.28	0.234499	0.63	0.594903	0.90586	220.87	83	1.4
M221T832	1.17611e+07	1.19946e+07	37.06	9.2472e+06	5.902e+06	80.8	1.27	0.35	0.160528	0.79	0.499935	0.869457	221.154	832.2	13.9
M222T108	1.43659e+06	1.42545e+06	28.81	1.07761e+06	1.09045e+06	33.95	1.33	0.41	0.194872	0.71	0.545008	1.2177	222.035	108.1	1.8
M222T122_2	2763953	2.6396e+06	27.2	3.14525e+06	3.03801e+06	19.42	0.88	-0.19	0.234499	0.63	0.594903	0.886617	222.044	121.5	2
M222T151	2.51481e+06	2776077	41.55	4.70669e+06	4.33612e+06	56.36	0.53	-0.9	0.0649573	1.19	0.325531	1.38421	222.024	151.3	2.5
M222T174	154815	138243	52.67	132915	116466	56.16	1.16	0.22	0.720901	0.14	0.912068	0.48109	222.077	173.9	2.9
M222T291	260040	243194	30.18	252291	243670	18.98	1.03	0.04	0.720901	0.14	0.912068	0.00738727	222.06	291.3	4.9
M222T335	124399	117555	33.52	93985	91972.7	37.26	1.32	0.4	0.160528	0.79	0.499935	1.14546	222.044	335.3	5.6
M222T336	21601.3	13748.8	67.16	46700.6	49496.1	52.43	0.46	-1.11	0.0379176	1.42	0.250052	1.55756	222.097	336.1	5.6
M222T34	153699	162410	11.95	170963	178148	12.31	0.9	-0.15	0.0281274	1.55	0.216677	1.14588	221.842	33.7	0.6
M222T382	110228	109765	21.25	37487.2	27966.9	88.61	2.94	1.56	0.0029526	2.53	0.0725285	2.33545	222.077	381.8	6.4
M222T409	1.66575e+06	386620	149.81	1.53418e+06	208130	139.95	1.09	0.12	0.328205	0.48	0.683277	0.183354	222.079	409.4	6.8
M222T432	312181	292536	26.06	761911	779596	49.73	0.41	-1.29	0.0206682	1.68	0.184282	2.01255	222.08	432.2	7.2
M222T507	140082	136135	48.78	116987	119496	58.59	1.2	0.26	0.720901	0.14	0.912068	0.651561	222.085	506.8	8.4
M222T54	330450	327088	7.24	396052	399900	9.78	0.83	-0.26	0.0018648	2.73	0.0601903	2.05493	221.8	53.7	0.9
M222T648	153927	172194	49.83	132128	136937	48.17	1.16	0.22	0.441803	0.35	0.767913	0.399698	221.982	648.5	10.8
M222T741	3.05263e+06	3.09399e+06	26.99	3.85079e+06	3.89185e+06	43.3	0.79	-0.34	0.234499	0.63	0.594903	0.478595	222.125	741.4	12.4
M222T752	5.15732e+06	4.20658e+06	57.1	1.76151e+06	1.98914e+06	56.34	2.93	1.55	0.0018648	2.73	0.0601903	1.97385	221.8	752.1	12.5
M222T92_1	694580	632832	25.76	801359	764482	22.45	0.87	-0.21	0.130381	0.88	0.452467	0.96168	222.037	92.4	1.5
M222T92_2	1.4245e+06	1.33012e+06	22.72	1.55015e+06	1.57019e+06	54.38	0.92	-0.12	1	0	1	0.239503	222.049	92.4	1.5
M222T95	2.27328e+06	1.56407e+06	81.54	2.75199e+06	2.08808e+06	85.75	0.83	-0.28	0.382284	0.42	0.724699	0.376327	222.008	94.6	1.6
M223T100	1.8099e+06	1.97727e+06	43.5	2.06629e+06	1.97403e+06	68.19	0.88	-0.19	0.95913	0.02	0.990213	0.151655	223.101	100.4	1.7
M223T118	188527	156343	55.17	298290	265803	43.11	0.63	-0.66	0.0379176	1.42	0.250052	1.36451	223.047	117.5	2
M223T122_1	1.91352e+06	1.90505e+06	24.08	2.2288e+06	2.28726e+06	25.31	0.86	-0.22	0.194872	0.71	0.545008	0.664588	223.028	122	2
M223T122_2	6.74397e+06	6.07969e+06	44.55	7.51789e+06	6.76718e+06	30.54	0.9	-0.16	0.278632	0.55	0.636272	0.622442	223.075	121.9	2
M223T147	1.5652e+06	1.32587e+06	46.75	1.13516e+06	954407	45.42	1.38	0.46	0.0829837	1.08	0.365948	1.03478	223.074	147.1	2.5
M223T151	454798	489551	24.06	595827	531220	27.84	0.76	-0.39	0.130381	0.88	0.452467	1.38063	223.028	151.1	2.5
M223T203	299270	259291	46.57	298079	287522	29.94	1	0.01	0.720901	0.14	0.912068	0.325873	223.072	202.8	3.4
M223T432	95389	87684.8	46.6	104221	124566	55.4	0.92	-0.13	0.645377	0.19	0.878479	0.0629278	223.083	432.3	7.2
M223T445	837209	882167	43.42	869717	870047	28.21	0.96	-0.05	0.95913	0.02	0.990213	0.482122	223.097	444.7	7.4
M223T583	1.00583e+06	944938	22.85	1.26109e+06	1.19316e+06	24.09	0.8	-0.33	0.0649573	1.19	0.325531	1.37224	223.028	583.2	9.7
M223T614	5.06156e+06	4.56785e+06	37.67	5.61581e+06	5.37558e+06	29.32	0.9	-0.15	0.573737	0.24	0.844385	0.574702	223.028	613.8	10.2
M223T651	475577	438323	66.37	451539	484451	46.7	1.05	0.07	0.798446	0.1	0.939353	0.158291	223.133	650.5	10.8
M223T666	515402	534230	39.6	515183	417464	66.45	1	0	0.798446	0.1	0.939353	0.335202	223.133	666.1	11.1
M223T697	387954	380564	45.4	449885	466692	44.21	0.86	-0.21	0.382284	0.42	0.724699	0.412167	223	696.8	11.6
M223T741	1.05166e+06	1.03426e+06	33.81	908646	968344	34.09	1.16	0.21	0.505361	0.3	0.806745	0.69305	223.118	741.4	12.4
M223T742	6.13684e+06	6.51971e+06	36.8	4.9221e+06	4.55517e+06	50.99	1.25	0.32	0.382284	0.42	0.724699	0.772483	223.028	742.4	12.4
M223T744	1.99675e+06	1.59503e+06	87.16	2.95462e+06	1.59815e+06	99.59	0.68	-0.57	0.95913	0.02	0.990213	0.488376	223.17	743.7	12.4
M223T752	287597	223162	95.11	1.15963e+06	1.08221e+06	71.4	0.25	-2.01	0.004662	2.33	0.0886941	2.00501	223.134	752.2	12.5
M223T767	1.38881e+06	1.31917e+06	62.02	1.87378e+06	2.0746e+06	42.68	0.74	-0.43	0.234499	0.63	0.594903	1.06822	223.134	767.1	12.8
M223T82	1.8088e+06	1.79932e+06	5.33	1.72544e+06	1.7882e+06	20.32	1.05	0.07	0.878477	0.06	0.966491	0.557204	222.999	82.3	1.4
M223T98	1.83229e+06	1.782e+06	32.9	1.4107e+06	1.23081e+06	45.91	1.3	0.38	0.160528	0.79	0.499935	1.03052	223.039	97.8	1.6
M224T102	134353	74216.9	112.32	300205	296067	22.09	0.45	-1.16	0.014763	1.83	0.158002	1.9127	224.103	101.7	1.7
M224T115	7.06982e+06	4.95847e+06	90.08	7.36665e+06	6.88576e+06	54.64	0.96	-0.06	0.278632	0.55	0.636272	0.116739	224.058	114.7	1.9
M224T122	1.88126e+06	2.05737e+06	36.26	1.47524e+06	1.30803e+06	41.99	1.28	0.35	0.328205	0.48	0.683277	0.858167	224.023	121.9	2
M224T149_1	60712.7	51143.2	82.09	74537.2	68930.7	72.25	0.81	-0.3	0.441803	0.35	0.767913	0.429248	223.964	148.6	2.5
M224T149_2	70958.4	65352.4	37.34	160864	139735	53.51	0.44	-1.18	0.00699301	2.16	0.1064	1.99008	224.078	148.8	2.5
M224T287	239279	234094	8.89	261156	257548	11.68	0.92	-0.13	0.160528	0.79	0.499935	1.17937	224.005	287.1	4.8
M224T331	21903.1	17766.9	37.46	35771.9	33834.8	27.24	0.61	-0.71	0.0104118	1.98	0.130233	2.02427	224.104	330.9	5.5
M224T387	64451.3	68113.8	23.2	80102.9	84380.7	25.87	0.8	-0.31	0.0379176	1.42	0.250052	0.828068	224.042	387.3	6.5
M224T39	412257	394605	10.4	474197	460548	16.52	0.87	-0.2	0.0498834	1.3	0.285686	1.22964	223.798	39.1	0.7
M224T397	47168	48847.3	23.03	46157.6	46613.9	13.52	1.02	0.03	0.95913	0.02	0.990213	0.0497523	224.112	397.1	6.6
M224T432	19084	19489.3	61.45	38187.6	28418.9	85.75	0.5	-1	0.194872	0.71	0.545008	0.424929	224.076	432.3	7.2
M224T445	152392	138925	70.75	281898	302781	26.51	0.54	-0.89	0.0379176	1.42	0.250052	1.61826	224.006	445.3	7.4
M224T487	147943	119543	40.65	212004	228723	43.16	0.7	-0.52	0.194872	0.71	0.545008	1.04852	224.048	486.5	8.1
M224T54	478537	486173	12.15	544031	544639	6.63	0.88	-0.19	0.0206682	1.68	0.184282	1.71943	223.798	53.8	0.9
M224T544	293094	226463	49.84	350353	377826	44.42	0.84	-0.26	0.720901	0.14	0.912068	0.470086	224.129	543.5	9.1
M224T554	67147.6	71972.9	77.62	75039.3	35207.9	116.13	0.89	-0.16	0.798446	0.1	0.939353	0.313969	224.093	554.1	9.2
M224T562	146875	131511	40.7	60979.9	66939.4	43.94	2.41	1.27	0.0029526	2.53	0.0725285	1.99656	224.056	561.7	9.4
M224T583	248078	225025	53.54	302540	264539	46.82	0.82	-0.29	0.505361	0.3	0.806745	0.70355	224.028	583.2	9.7
M224T614	692062	799918	35.77	442479	378854	34.09	1.56	0.65	0.0649573	1.19	0.325531	1.41802	224.028	613.8	10.2
M224T69	279514	273936	16.58	419285	430304	25.14	0.67	-0.59	0.00699301	2.16	0.1064	1.9084	224.027	68.5	1.1
M224T747	307414	296592	55.2	98855	99512.1	51.44	3.11	1.64	0.00699301	2.16	0.1064	1.93032	224.166	747	12.4
M224T753	6.72963e+06	7.32026e+06	58.72	8.80995e+06	8.24051e+06	46.65	0.76	-0.39	0.382284	0.42	0.724699	0.941913	223.798	752.7	12.5
M224T759	6.18752e+06	8.46211e+06	67.95	6.86547e+06	7.14251e+06	69.8	0.9	-0.15	0.798446	0.1	0.939353	0.215593	224.028	758.6	12.6
M224T78	3.16025e+07	3.12199e+07	37.57	3.04108e+07	2.67851e+07	41.68	1.04	0.06	0.645377	0.19	0.878479	0.0584062	224.023	77.6	1.3
M224T82	591720	618621	15.35	652814	624883	18.43	0.91	-0.14	0.505361	0.3	0.806745	0.765772	224.056	81.5	1.4
M225T315	53764.3	57632.2	40.51	39593.8	49141.7	71.2	1.36	0.44	0.382284	0.42	0.724699	0.831891	225.034	314.7	5.2
M225T378	141239	140520	24.51	153935	151688	25.77	0.92	-0.12	0.720901	0.14	0.912068	0.473393	225.088	377.7	6.3
M225T424	132744	123990	60.6	69366.2	61768.1	68.03	1.91	0.94	0.0829837	1.08	0.365948	1.33848	225.023	423.7	7.1
M225T454	55019.5	41757.9	113.63	30080.6	22149.1	125.04	1.83	0.87	0.130381	0.88	0.452467	0.947204	225.007	454.4	7.6
M225T515	38032.2	42401.9	55.71	44421.7	48417	21.93	0.86	-0.22	1	0	1	0.861482	225.007	514.9	8.6
M225T518	361683	401159	40.84	270701	212401	83.6	1.34	0.42	0.194872	0.71	0.545008	1.0465	225.149	518.1	8.6
M225T527	402790	417024	38.77	344346	363302	36.62	1.17	0.23	0.573737	0.24	0.844385	0.463749	225.076	526.7	8.8
M225T535	169721	94689.2	78.06	198648	185067	36.08	0.85	-0.23	0.328205	0.48	0.683277	0.875999	224.979	535.1	8.9
M225T614_1	142595	162750	48.85	78625.6	67223.9	51.71	1.81	0.86	0.0829837	1.08	0.365948	1.46395	225.007	614	10.2
M225T614_2	374048	394070	53.87	657628	612823	72.74	0.57	-0.81	0.234499	0.63	0.594903	0.845325	225.025	613.9	10.2
M225T619	1.15255e+06	1.08645e+06	37.93	1.62376e+06	1.68751e+06	31.87	0.71	-0.49	0.0649573	1.19	0.325531	1.07416	225.149	618.8	10.3
M225T633	145243	140592	65.02	235859	202168	44.82	0.62	-0.7	0.160528	0.79	0.499935	1.54108	225.092	632.9	10.5
M225T69_1	339428	378556	44.65	453132	470104	31.52	0.75	-0.42	0.104895	0.98	0.407489	1.02585	224.971	69.1	1.2
M225T69_2	3.27023e+06	3.05592e+06	21.38	3.53677e+06	3.48207e+06	18.93	0.92	-0.11	0.505361	0.3	0.806745	0.698356	225.007	69.1	1.2
M225T703	310139	295987	59.11	552691	561313	22.87	0.56	-0.83	0.014763	1.83	0.158002	1.91997	225.092	703.1	11.7
M225T710	1.49099e+06	1.23224e+06	61.95	1.14634e+06	988239	59.17	1.3	0.38	0.441803	0.35	0.767913	0.571113	225.149	709.9	11.8
M225T727	1.11224e+06	1.22292e+06	31.16	1.13261e+06	1.06839e+06	25.36	0.98	-0.03	0.95913	0.02	0.990213	0.0717211	224.979	727.5	12.1
M225T759	3.85819e+06	4.10312e+06	20.57	4.66453e+06	4.61371e+06	24.26	0.83	-0.27	0.104895	0.98	0.407489	1.07629	225.025	758.6	12.6
M225T77	929008	873863	26.87	1.06296e+06	1.01208e+06	43.41	0.87	-0.19	0.720901	0.14	0.912068	0.464599	225.027	77.3	1.3
M225T83	3.52179e+06	3.67419e+06	11.76	4.76177e+06	4.96047e+06	18.34	0.74	-0.44	0.00699301	2.16	0.1064	1.99286	224.819	82.6	1.4
M225T84	2.10587e+07	2.08886e+07	7.15	2.17313e+07	2.23743e+07	19.28	0.97	-0.05	0.645377	0.19	0.878479	0.300626	225.061	84.4	1.4
M225T85	1.21168e+07	1.22104e+07	7.64	1.00093e+07	1.11836e+07	32.79	1.21	0.28	0.0498834	1.3	0.285686	1.09562	224.998	84.5	1.4
M225T90	1.44684e+07	1.45025e+07	4.4	1.43139e+07	1.44104e+07	4.59	1.01	0.02	0.441803	0.35	0.767913	0.517641	225.061	89.8	1.5
M225T93	5.76185e+07	6.17826e+07	21.35	5.7361e+07	5.91274e+07	30.97	1	0.01	0.95913	0.02	0.990213	0.117217	225.099	93.3	1.6
M226T214	1.40656e+06	1.36624e+06	18.2	1.32948e+06	1.40618e+06	24.65	1.06	0.08	0.720901	0.14	0.912068	0.515263	226.083	213.6	3.6
M226T290	270554	234537	43.76	274383	250612	41.65	0.99	-0.02	0.720901	0.14	0.912068	0.0134634	225.985	289.7	4.8
M226T315	575005	594833	28.6	608870	667006	21.39	0.94	-0.08	0.645377	0.19	0.878479	0.276405	226.083	314.7	5.2
M226T323	322618	337137	37.15	367406	391703	58.81	0.88	-0.19	0.645377	0.19	0.878479	0.0943921	226.083	323.4	5.4
M226T355	242354	250544	29.14	247254	256626	52.47	0.98	-0.03	0.798446	0.1	0.939353	0.257142	226.108	355.2	5.9
M226T372	984559	932265	29.17	1.17515e+06	1.114e+06	50.41	0.84	-0.26	0.382284	0.42	0.724699	0.107856	226.108	371.9	6.2
M226T407	7.48863e+06	6.87717e+06	60.06	1.18603e+07	8.05148e+06	61.97	0.63	-0.66	0.234499	0.63	0.594903	1.05515	226.108	407.4	6.8
M226T419	761226	880756	39.94	697167	688727	49.26	1.09	0.13	0.441803	0.35	0.767913	0.426665	226.028	418.7	7
M226T439	31658.8	25955.5	47.24	38883.7	36506.6	40.4	0.81	-0.3	0.328205	0.48	0.683277	0.709912	226.036	439.2	7.3
M226T448	75140.5	64450.3	69.41	81627.3	83106.5	72.13	0.92	-0.12	1	0	1	0.0645799	226.072	448.1	7.5
M226T449	362974	364997	36.46	189997	132099	104.27	1.91	0.93	0.0281274	1.55	0.216677	1.5346	226.054	448.9	7.5
M226T485	130859	110545	62.64	69568.2	60060.8	58.13	1.88	0.91	0.0379176	1.42	0.250052	1.31958	226.145	484.6	8.1
M226T487	33732.5	21889.9	83.5	109606	107447	66.11	0.31	-1.7	0.0206682	1.68	0.184282	1.77719	226.046	486.6	8.1
M226T525	141492	142030	33.62	131284	133628	18.45	1.08	0.11	0.645377	0.19	0.878479	0.0944121	226.117	525.4	8.8
M226T54	327083	317196	45.26	342719	209998	64.37	0.95	-0.07	0.878477	0.06	0.966491	0.0649485	225.796	53.6	0.9
M226T565	130193	113739	61.04	108315	102682	71.28	1.2	0.27	0.645377	0.19	0.878479	0.424099	226.145	564.7	9.4
M226T688	124977	89791.4	83.08	114040	82624.8	87.9	1.1	0.13	0.573737	0.24	0.844385	0.374484	226.128	688.2	11.5
M226T723	302326	298985	34.51	229351	250179	38.17	1.32	0.4	0.234499	0.63	0.594903	1.00569	225.796	722.5	12
M226T752	1.06869e+06	1.05765e+06	26.96	1.17994e+06	1.22828e+06	32.92	0.91	-0.14	0.573737	0.24	0.844385	0.375811	225.796	751.8	12.5
M226T81	1.38284e+06	1.40399e+06	14.04	1.29432e+06	1.31701e+06	21.16	1.07	0.1	0.441803	0.35	0.767913	0.666174	226.039	81.5	1.4
M226T82	3.53239e+06	3.60095e+06	26.32	5.35002e+06	5.27096e+06	37.32	0.66	-0.6	0.0649573	1.19	0.325531	1.49778	225.986	82.1	1.4
M226T90_1	387534	382791	10	428946	425472	12.18	0.9	-0.15	0.160528	0.79	0.499935	1.14378	226.012	90.3	1.5
M226T90_2	1.36106e+06	1.3046e+06	16.42	1.76513e+06	1.80971e+06	13.27	0.77	-0.38	0.0029526	2.53	0.0725285	2.00814	226.065	89.6	1.5
M226T95	1.8501e+06	1.86369e+06	35.3	2.9269e+06	3.25715e+06	65.6	0.63	-0.66	0.382284	0.42	0.724699	0.422749	226.039	95.3	1.6
M227T108	5.44952e+07	5.39801e+07	31.59	4.54016e+07	4.72901e+07	27.94	1.2	0.26	0.441803	0.35	0.767913	0.873177	226.996	107.6	1.8
M227T115	1.82188e+06	1.45462e+06	52.81	1.54036e+06	1284070	47.83	1.18	0.24	0.573737	0.24	0.844385	0.447428	227.115	115.1	1.9
M227T117	579011	563861	21.75	394932	358667	37.37	1.47	0.55	0.0281274	1.55	0.216677	1.71799	226.978	116.7	1.9
M227T126	2.51359e+06	2.48779e+06	33.97	3.31122e+06	3.53459e+06	38.31	0.76	-0.4	0.234499	0.63	0.594903	0.87017	227.086	125.7	2.1
M227T154	714477	460663	56.33	1.72449e+06	1.84156e+06	38.38	0.41	-1.27	0.0029526	2.53	0.0725285	1.90573	227.067	153.6	2.6
M227T163	535261	539808	42.38	499020	459244	19.53	1.07	0.1	0.234499	0.63	0.594903	0.360001	227.067	163.1	2.7
M227T224	2.08807e+06	2.1721e+06	14.33	997382	1.16027e+06	69.88	2.09	1.07	0.0010878	2.96	0.0513787	1.2203	227.067	223.6	3.7
M227T244	365350	373879	6.85	371437	376408	6.72	0.98	-0.02	0.720901	0.14	0.912068	0.305726	227.092	243.8	4.1
M227T283	202520	201942	41.25	120254	130850	56.92	1.68	0.75	0.0379176	1.42	0.250052	1.32903	227.14	282.7	4.7
M227T354	1.58497e+06	1.62787e+06	21.81	1.11973e+06	1.08586e+06	27.53	1.42	0.5	0.0206682	1.68	0.184282	1.81356	227.013	354.3	5.9
M227T374	294925	285793	34.63	372861	399642	40	0.79	-0.34	0.194872	0.71	0.545008	0.798973	227.092	374.1	6.2
M227T393	149636	139515	25.22	152163	146524	23.78	0.98	-0.02	0.878477	0.06	0.966491	0.224847	227.045	393	6.6
M227T419	46703.8	44924.5	21.68	37230	35933.6	10.07	1.25	0.33	0.0281274	1.55	0.216677	1.57741	227.031	418.6	7
M227T431	171036	124512	48.19	175226	185586	66.78	0.98	-0.03	0.720901	0.14	0.912068	0.54938	227.092	431.2	7.2
M227T482	35251.2	31694.4	36.27	29002.1	32289.5	57.35	1.22	0.28	0.573737	0.24	0.844385	0.703134	227.038	482.3	8
M227T483	5.39038e+06	5.02052e+06	38.74	3.51166e+06	3.20126e+06	30.66	1.53	0.62	0.0379176	1.42	0.250052	1.49366	227.129	482.9	8
M227T532	1.55232e+06	1.60912e+06	27	1.00699e+06	774341	77.49	1.54	0.62	0.0649573	1.19	0.325531	1.36117	227.129	531.7	8.9
M227T547	1.40054e+06	1.12364e+06	62.63	1.73483e+06	1.81433e+06	32.8	0.81	-0.31	0.441803	0.35	0.767913	0.924595	227.129	547.4	9.1
M227T674	1.14274e+06	1.08902e+06	46.31	1.06936e+06	973044	71.23	1.07	0.1	0.720901	0.14	0.912068	0.440116	227.129	673.7	11.2
M227T69	500059	459897	32.11	443476	369001	42.47	1.13	0.17	0.382284	0.42	0.724699	0.801293	226.987	69.3	1.2
M227T70	569743	556118	10.5	721452	766328	18.94	0.79	-0.34	0.0281274	1.55	0.216677	1.65356	227.018	70	1.2
M227T758	2.20036e+06	2.05478e+06	33.3	2.0699e+06	1.66865e+06	80.03	1.06	0.09	0.441803	0.35	0.767913	0.792141	226.978	757.8	12.6
M227T762	2.66197e+06	2.05854e+06	57.74	4.59053e+06	4.96112e+06	28.8	0.58	-0.79	0.0829837	1.08	0.365948	1.61888	227.165	761.9	12.7
M227T814	1.38759e+06	1.16759e+06	58.01	2.09284e+06	1.28339e+06	78.25	0.66	-0.59	0.573737	0.24	0.844385	0.787683	227.201	814.3	13.6
M227T83	1.2459e+06	1.28851e+06	22.93	5.26818e+06	6.22517e+06	54.54	0.24	-2.08	0.004662	2.33	0.0886941	2.1111	226.816	82.6	1.4
M227T90_1	571143	575286	14.34	596570	483033	39.3	0.96	-0.06	0.573737	0.24	0.844385	0.163638	226.966	89.9	1.5
M228T108	3.83481e+06	3.8035e+06	22.35	3.67311e+06	3.63923e+06	11.07	1.04	0.06	0.505361	0.3	0.806745	0.0806743	228	107.6	1.8
M228T114	2.18729e+06	2.18204e+06	11.44	2.09483e+06	2.08925e+06	4.14	1.04	0.06	0.328205	0.48	0.683277	0.668851	228.099	113.6	1.9
M228T115	161276	164100	27.84	142781	137542	23.76	1.13	0.18	0.160528	0.79	0.499935	0.533235	228.118	115.1	1.9
M228T118	585407	552440	28.88	628017	594177	47.28	0.93	-0.1	1	0	1	0.109533	228.018	118.4	2
M228T212	742280	864515	65.39	1.01214e+06	1.08172e+06	43.55	0.73	-0.45	0.194872	0.71	0.545008	0.337299	228.052	212.4	3.5
M228T256	36056.6	25475.4	79.15	67384.7	48442.7	73.16	0.54	-0.9	0.160528	0.79	0.499935	0.991147	228.045	255.9	4.3
M228T31	46219.9	43898.3	14.82	39253	28876.4	61.98	1.18	0.24	0.278632	0.55	0.636272	0.999569	227.96	31.2	0.5
M228T32	26131.9	16387.8	68.43	59841.1	53545	61.02	0.44	-1.2	0.014763	1.83	0.158002	1.56355	227.937	31.6	0.5
M228T363	856348	761204	43.12	873860	886419	25.95	0.98	-0.03	0.645377	0.19	0.878479	0.310941	228	363.1	6.1
M228T374_1	72827.9	47711.1	116.86	220433	256100	62.52	0.33	-1.6	0.0498834	1.3	0.285686	1.16796	228.033	373.6	6.2
M228T391	315111	322623	23.68	299150	312937	31.36	1.05	0.07	0.95913	0.02	0.990213	0.321351	228.124	390.6	6.5
M228T407	23538.3	15622.2	94.05	101837	96844.7	58.84	0.23	-2.11	0.0104118	1.98	0.130233	2.04991	228.114	407.4	6.8
M228T419	133814	146007	27.21	149284	153574	13.06	0.9	-0.16	0.798446	0.1	0.939353	0.687743	228.025	418.7	7
M228T457	154223	142930	41.73	93853.1	88835	50.92	1.64	0.72	0.0498834	1.3	0.285686	1.30857	228.088	457	7.6
M228T483	1.08722e+06	908800	56.88	874617	677252	91.98	1.24	0.31	0.234499	0.63	0.594903	0.686977	228.132	482.7	8
M228T547_1	506803	396578	51.52	307041	278231	42.88	1.65	0.72	0.0498834	1.3	0.285686	1.43898	228.132	547.5	9.1
M228T559	69111.2	72638.9	38.39	118042	120060	12.83	0.59	-0.77	0.000621601	3.21	0.0444681	1.90223	228.103	558.8	9.3
M228T625	53273.4	46396.7	28.99	85723.6	95204.2	38.38	0.62	-0.69	0.0829837	1.08	0.365948	1.58547	228.066	624.9	10.4
M228T674	40339.1	31955.5	52.07	72809.8	80035.1	42.58	0.55	-0.85	0.0281274	1.55	0.216677	1.56133	228.132	673.7	11.2
M228T80	1.9798e+07	1.89085e+07	24.77	2.0251e+07	2.13988e+07	23.47	0.98	-0.03	0.645377	0.19	0.878479	0.0686107	228.064	80.4	1.3
M228T82	1.76512e+06	1.54021e+06	44.12	2.17238e+06	1.45373e+06	75.48	0.81	-0.3	0.878477	0.06	0.966491	0.273869	227.983	81.9	1.4
M228T92	4.45034e+06	4.15847e+06	16.96	3.44045e+06	3.41351e+06	16.39	1.29	0.37	0.0104118	1.98	0.130233	1.91334	228.064	92.1	1.5
M228T94	523839	516377	5.65	523590	514705	7.09	1	0	0.878477	0.06	0.966491	0.0602616	228.01	94.2	1.6
M228T95	2.16753e+06	2305671	12.34	2.42749e+06	2.48493e+06	21.96	0.89	-0.16	0.194872	0.71	0.545008	0.633408	228.038	95.1	1.6
M228T98	1.36394e+06	1.65768e+06	51.39	1.21319e+06	1.30641e+06	48.94	1.12	0.17	0.505361	0.3	0.806745	0.221956	228.051	97.9	1.6
M229T108	1.09483e+07	1.08476e+07	21.62	1.78385e+07	1.62311e+07	36.31	0.61	-0.7	0.014763	1.83	0.158002	1.79337	228.994	107.6	1.8
M229T112	252128	235929	37.92	234075	186264	48.37	1.08	0.11	0.573737	0.24	0.844385	0.227285	229.13	111.9	1.9
M229T114	186330	229794	55.94	231645	169982	86.97	0.8	-0.31	0.95913	0.02	0.990213	0.418556	229.102	113.7	1.9
M229T126	168415	176378	54.69	246895	246170	17.41	0.68	-0.55	0.0649573	1.19	0.325531	1.52552	229.083	126	2.1
M229T149_1	480480	448161	41.94	649451	734475	30.06	0.74	-0.43	0.130381	0.88	0.452467	0.953616	229.054	149.5	2.5
M229T212	99042.7	115119	50.67	83831.5	75189.8	35.92	1.18	0.24	0.441803	0.35	0.767913	0.0967692	229.055	212.4	3.5
M229T222	114014	113819	25.05	122272	126421	23.82	0.93	-0.1	0.505361	0.3	0.806745	0.411417	229.029	222.2	3.7
M229T304	42265.3	44744.1	51.92	101544	93988.4	74.03	0.42	-1.26	0.234499	0.63	0.594903	1.08228	229.119	303.8	5.1
M229T34	134874	131700	9.24	141440	145695	11.45	0.95	-0.07	0.645377	0.19	0.878479	0.597491	228.994	33.5	0.6
M229T347	174938	120442	75.14	141574	115993	53.28	1.24	0.31	0.878477	0.06	0.966491	0.145199	229.156	346.5	5.8
M229T374	17704.5	8533.1	116.49	58716.3	21436.9	118.22	0.3	-1.73	0.798446	0.1	0.939353	0.417191	229.108	374.1	6.2
M229T527	98203.5	92229.4	52.91	153405	157444	50.36	0.64	-0.64	0.130381	0.88	0.452467	1.13575	229.098	527.2	8.8
M229T529	1.45681e+06	1.44311e+06	10.77	1.67233e+06	1.6e+06	15.75	0.87	-0.2	0.0649573	1.19	0.325531	1.33197	229.144	529.3	8.8
M229T537	157799	90115.4	95.16	181729	113146	78.5	0.87	-0.2	0.328205	0.48	0.683277	0.52015	229.164	536.5	8.9
M229T544	1.45541e+06	1.47887e+06	27.6	1.01166e+06	1.01759e+06	29.65	1.44	0.52	0.0206682	1.68	0.184282	1.59012	229.144	544.2	9.1
M229T616	57768.2	59102.4	60.57	100374	91417.8	56.81	0.58	-0.8	0.104895	0.98	0.407489	1.1659	229.09	616.5	10.3
[truncated: 10,234 more rows]
