# Supplementary material for: The impact of dapagliflozin for the myocardial metabolomic profiles of mice with chronic heart failure induced by a high fat diet
Source: Research Square preprint supplement (doi:10.21203/rs.3.rs-6881055/v1), 2025-06-25
Supplement: Supplementary file 3 [file 1d9d5e676de76fd40040a6e3.xlsx]

## Sheet: DEM
Accession	DAPA1	DAPA2	DAPA3	DAPA4	DAPA5	DAPA6	DAPA7	DAPA8	HDF1	HDF2	HDF3	HDF4	HDF5	HDF6	HDF7	HDF8		DAPA_Mean	DAPA_Median	DAPA_RSD	HDF_Mean	HDF_Median	HDF_RSD	FC	log2FC	P.value	-log10(P.value)	FDR	VIP	Mass-to-charge ratio	Retention indices	Retention times(min)	Regulation
M102T90	1.00657e+06	1.89609e+06	781460	1.60865e+06	473576	1.22508e+06	789214	918637	5.11001e+06	922498	2.31909e+06	5.56394e+06	2.54765e+06	1.60616e+06	1.17392e+06	3.03772e+06		1.08741e+06	962604	43.12	2.78512e+06	2.43337e+06	62.07	0.39	-1.36	0.014763	1.83	0.158002	1.67113	102.02	90.3	1.5	Down
M103T303	1.13961e+06	1.01399e+06	1.24731e+06	1.27372e+06	1.04744e+06	1.14786e+06	1.03645e+06	1.1178e+06	726747	805001	974183	1.69811e+06	939245	990654	1.00516e+06	981280		1.12802e+06	1.1287e+06	8.47	1.01505e+06	977731	28.92	1.11	0.15	0.0104118	1.98	0.130233	1.14601	103.004	303.1	5.1	Up
M103T80	1.48822e+06	2.8114e+06	1.98358e+06	2.7483e+06	1.34243e+06	1.4963e+06	1.66374e+06	2.8048e+06	1.03816e+06	1.34493e+06	1.15667e+06	1.51201e+06	716221	2.20185e+06	1.22276e+06	1.37816e+06		2.04235e+06	1.82366e+06	31.59	1.32135e+06	1.28385e+06	32.6	1.55	0.63	0.0206682	1.68	0.184282	1.79717	103.059	80.4	1.3	Up
M103T83	7.59542e+07	5.20626e+07	6.70834e+07	3.81122e+07	5.47375e+07	6.16021e+07	5.95742e+07	5.85593e+07	5.98269e+07	7.87918e+07	9.95817e+07	6.8733e+07	8.40628e+07	6.52393e+07	6.68371e+07	8.76719e+07		5.84607e+07	5.90668e+07	18.96	7.63431e+07	7.37624e+07	17.7	0.77	-0.39	0.0104118	1.98	0.130233	1.86989	102.957	83.3	1.4	Down
M103T93	2.33212e+06	2.36424e+06	2.41339e+06	2.41133e+06	2.44781e+06	2.2084e+06	2.54443e+06	2.54443e+06	2.21857e+06	1.73246e+06	2.49448e+06	2.4416e+06	2.22351e+06	2.04626e+06	1.72825e+06	2.09563e+06		2.40827e+06	2.41236e+06	4.61	2.12259e+06	2.1571e+06	13.49	1.13	0.18	0.0498834	1.3	0.285686	1.68689	103.004	92.7	1.5	Up
M106T455	819077	1.44659e+06	779910	1.14714e+06	3.97348e+06	1.27598e+06	1.34598e+06	1.5333e+06	679622	587673	1.05118e+06	420945	608647	528063	370240	456746		1.54018e+06	1.31098e+06	66.26	587890	557868	36.34	2.62	1.39	0.000621601	3.21	0.0444681	2.09221	106.04	454.7	7.6	Up
M108T251	184523	146453	151089	145713	269450	129216	152712	123219	259418	226782	292161	181295	178767	152975	206624	221627		162797	148771	28.75	214956	214126	21.16	0.76	-0.4	0.0206682	1.68	0.184282	1.73804	108.02	250.5	4.2	Down
M108T94	1.42459e+06	1.44514e+06	1.69441e+06	1.4214e+06	2.07993e+06	1.54812e+06	1.82974e+06	1.42178e+06	28264.6	1.30665e+06	130693	177692	135938	1.0042e+06	1.00318e+06	1.1653e+06		1.60814e+06	1.49663e+06	15.1	618990	590434	88.12	2.6	1.38	0.0001554	3.81	0.0365579	1.7782	108.057	93.5	1.6	Up
M109T122	1.66514e+06	1.37423e+06	1.88468e+06	1.42432e+06	1.24998e+06	1.36452e+06	1.46397e+06	1.37709e+06	1.73064e+06	1.397e+06	2.71888e+06	2.20597e+06	1.7209e+06	1.61598e+06	1.43014e+06	1.4651e+06		1.47549e+06	1.4007e+06	13.78	1.78558e+06	1.66844e+06	25.61	0.83	-0.28	0.0498834	1.3	0.285686	1.2471	109.041	121.7	2	Down
M109T147	33111.5	33205.4	47316	30982.3	47962.5	63149.5	32525.9	43514	378773	29828.6	385373	576694	509516	348650	263980	298109		41470.9	38359.7	27.02	348865	363711	47.41	0.12	-3.07	0.0104118	1.98	0.130233	2.29436	109.041	146.7	2.4	Down
M109T83	2.1112e+07	2.15801e+07	2.19434e+07	2.08606e+07	1.77788e+07	2.05536e+07	2.09947e+07	2.01807e+07	2.81939e+07	2.02909e+07	3.28652e+07	2.47116e+07	2.56635e+07	2.10955e+07	2.11764e+07	2.28401e+07		2.06255e+07	2.09277e+07	6.18	2.46046e+07	2.37759e+07	17.38	0.84	-0.25	0.0281274	1.55	0.216677	1.63557	108.902	82.6	1.4	Down
M111T97_2	1.51391e+07	1.53428e+07	1.51716e+07	1.64522e+07	1.63225e+07	1.61e+07	2.11111e+07	1.8793e+07	1.0794e+06	1.72434e+07	3.99283e+06	860514	5.38033e+06	1.04731e+07	1.13063e+07	2.15095e+06		1.6804e+07	1.62112e+07	12.51	6.56086e+06	4.68658e+06	89.6	2.56	1.36	0.004662	2.33	0.0886941	1.87494	111.02	96.6	1.6	Up
M112T770	1.63818e+06	2.07405e+06	4.86915e+06	1.8205e+06	3.87821e+06	3.36817e+06	5.25317e+06	4.27907e+06	6.24247e+06	3.26772e+06	1.12384e+07	5.20907e+06	5.38882e+06	7.06816e+06	8.83429e+06	2.30794e+06		3.39756e+06	3.62319e+06	41.55	6.19461e+06	5.81564e+06	46.65	0.55	-0.87	0.0281274	1.55	0.216677	1.5125	112.051	770.3	12.8	Down
M112T802	2.88408e+06	4.1854e+06	1.76188e+06	3.39507e+06	1.26729e+07	7.48885e+06	3.9603e+06	4.66474e+06	3.30972e+06	2.00446e+06	2.87756e+06	1.67197e+06	901939	1.01508e+06	581217	476283		5.12665e+06	4.07285e+06	67.7	1.60478e+06	1.34353e+06	66.01	3.19	1.68	0.0018648	2.73	0.0601903	2.00254	112.052	801.9	13.4	Up
M113T374	3.68954e+07	1.67368e+08	1.36799e+08	2.14969e+08	1.53607e+08	1.73868e+08	1.42392e+08	2.62598e+08	9.02182e+07	8.24257e+07	8.78218e+07	4.06465e+07	6.83377e+07	5.03431e+07	1.03405e+08	4.31974e+07		1.61062e+08	1.60488e+08	40.53	7.07994e+07	7.53817e+07	33.6	2.27	1.19	0.0104118	1.98	0.130233	1.85833	112.986	373.8	6.2	Up
M113T83	2.39498e+06	2.19558e+06	3.09702e+06	2.1141e+06	2.15749e+06	2.03677e+06	2.05817e+06	2.11487e+06	3.12809e+06	2.11254e+06	3.55843e+06	3.14119e+06	2.75236e+06	2.39111e+06	2.20678e+06	3.097e+06		2.27112e+06	2.13618e+06	15.48	2.79844e+06	2.92468e+06	18.53	0.81	-0.3	0.0379176	1.42	0.250052	1.5735	112.896	82.6	1.4	Down
M113T85	2.56575e+06	3.22362e+06	2.41147e+06	3.34937e+06	2.65327e+06	3.42218e+06	3.27267e+06	3.48057e+06	19034.4	2.64783e+06	21184.4	21202.2	19773.1	1.71949e+06	1.8999e+06	1.87386e+06		3.04736e+06	3.24815e+06	14.1	1.02778e+06	870347	108.09	2.96	1.57	0.000621601	3.21	0.0444681	1.76378	113.036	85.2	1.4	Up
M114T709	1.14548e+06	1.6954e+06	1.87571e+06	1.89613e+06	733302	1.52857e+06	2.12907e+06	1.41659e+06	1.31438e+06	1.07093e+06	609817	1.20269e+06	660741	1.40917e+06	1.40079e+06	1.40428e+06		1.55253e+06	1.61198e+06	29.12	1.1341e+06	1.25854e+06	29.05	1.37	0.45	0.0281274	1.55	0.216677	1.33995	113.989	708.9	11.8	Up
M114T94	474233	510725	476649	415377	556435	616293	601621	633709	816362	911170	866686	693039	765700	590516	591130	861349		535630	533580	14.67	761994	791031	16.41	0.7	-0.51	0.004662	2.33	0.0886941	2.19853	114.031	94.5	1.6	Down
M114T96	8.89871e+06	1.42936e+07	1.19352e+07	1.60479e+07	1.40519e+07	1.38988e+07	1.59443e+07	1.5393e+07	8.7876e+06	9.97538e+06	1.084e+07	8.96802e+06	6.34545e+06	9.66544e+06	1.15745e+07	8.99944e+06		1.38079e+07	1.41728e+07	17.31	9.39449e+06	9.33244e+06	16.71	1.47	0.56	0.004662	2.33	0.0886941	2.13139	114.056	96.3	1.6	Up
M115T117	341812	392465	312594	391743	417874	391836	450436	368913	297561	332861	297969	324296	319014	368836	417165	346265		383459	391789	11.18	337996	328578	11.78	1.13	0.18	0.0498834	1.3	0.285686	1.48908	114.99	117.4	2	Up
M115T84	1.83515e+06	1.5835e+06	1.43961e+06	2.29701e+06	1.80909e+06	1.45013e+06	1.71174e+06	1.64052e+06	1.24863e+06	946847	1.34964e+06	1.52316e+06	1.06744e+06	1.92036e+06	1.60121e+06	904512		1.72084e+06	1.67613e+06	16	1.32023e+06	1.29914e+06	26.59	1.3	0.38	0.0379176	1.42	0.250052	1.7392	114.99	84	1.4	Up
M116T157	5.08588e+06	8.5035e+06	5.93281e+06	5.75654e+06	3.14529e+06	6.64968e+06	4.45195e+06	5.28278e+06	4.36782e+06	3.04886e+06	3.01466e+06	4.42675e+06	5.86575e+06	4.78373e+06	2.79295e+06	3.35129e+06		5.60105e+06	5.51966e+06	28.13	3.95648e+06	3.85955e+06	27.27	1.42	0.5	0.0206682	1.68	0.184282	1.69926	116.071	156.9	2.6	Up
M116T99	5.57658e+06	2.55732e+06	2.99601e+06	2.59459e+06	1.84655e+06	3.80915e+06	1.65215e+06	2.23824e+06	2.93313e+06	2.60363e+06	3.00933e+06	3.50263e+06	4.79209e+06	4.33494e+06	3.96952e+06	6.37728e+06		2.90882e+06	2.57595e+06	43.71	3.94032e+06	3.73608e+06	31.35	0.74	-0.44	0.0498834	1.3	0.285686	1.33247	116.035	99.2	1.7	Down
M117T309	63358.7	228778	257540	275232	27995.1	145400	18943	30960.2	817458	320618	563890	266931	628642	341797	387779	620123		131026	104379	83.77	493405	475835	39.03	0.27	-1.91	0.0003108	3.51	0.040447	2.07809	116.907	309.4	5.2	Down
M117T77	2.30521e+07	2.28907e+06	6.22719e+06	5.09524e+06	6.39199e+06	2.38375e+06	7.55399e+06	3.96027e+06	6.81214e+06	8.45743e+06	5.61543e+06	1.71357e+07	9.78988e+06	9.80127e+06	2.35388e+07	8.36454e+06		7.1192e+06	5.66121e+06	94.26	1.11894e+07	9.12365e+06	54.2	0.64	-0.65	0.0281274	1.55	0.216677	1.41346	117.019	76.5	1.3	Down
M118T557	13073.7	19148.4	10594.9	42750.1	792332	7574.25	5064.43	5167.25	228408	1.48926e+06	477000	7289.73	208150	50117.2	46355.9	553165		111963	11834.3	245.78	382468	218279	128.14	0.29	-1.77	0.0379176	1.42	0.250052	1.69584	118.03	557.2	9.3	Down
M119T31_1	60755.1	58818.2	59213.6	67295.1	59355.2	55855.5	60738.7	61622.4	49816.5	46766	58609.7	59632.6	49357.6	57934	56707.9	43757.6		60456.7	60046.9	5.41	52822.8	53262.2	11.56	1.14	0.19	0.00699301	2.16	0.1064	1.88894	118.9	30.8	0.5	Up
M119T31_2	236213	335282	190941	139528	251835	208311	187439	58348.3	176723	31421	32146.1	238171	48419.7	35362.3	162220	40908		200987	199626	40.47	95671.3	44663.9	86.86	2.1	1.07	0.0206682	1.68	0.184282	1.71341	118.927	31.1	0.5	Up
M122T257	312748	221872	238938	94765	47343.5	463958	115579	333769	980705	180791	571312	373202	774976	327105	392319	705483		228622	230405	61.24	538237	481816	49.74	0.42	-1.24	0.014763	1.83	0.158002	1.7135	122.034	257.3	4.3	Down
M123T113	27960.2	209328	6051.8	174030	123923	8091.1	250172	2635.56	261011	149939	362767	166361	265215	233881	125993	213950		100274	75941.6	101.49	222390	223916	34.38	0.45	-1.15	0.0281274	1.55	0.216677	1.6185	123.02	112.7	1.9	Down
M124T116	1.08846e+06	52666.7	125166	711710	1.00293e+06	717177	781738	516761	1.06151e+06	1.1397e+06	1.03682e+06	889880	1.62392e+06	1.42249e+06	1.6937e+06	1.19694e+06		624575	714444	60.13	1.25812e+06	1.16832e+06	23.11	0.5	-1.01	0.0018648	2.73	0.0601903	1.64548	123.902	115.8	1.9	Down
M124T68	7.34955e+06	3.15181e+06	2.72776e+06	2.22301e+06	2.306e+06	2.36238e+06	2.9668e+06	819065	581425	839402	511136	628438	2.19833e+06	2.07464e+06	604046	3.16624e+06		2.9883e+06	2.54507e+06	63.57	1.32546e+06	733920	76.36	2.25	1.17	0.0206682	1.68	0.184282	1.61226	124.007	68.2	1.1	Up
M125T114	238130	238653	245589	278739	146831	242702	214623	207503	2360.63	133622	2738.45	7568.14	4533.61	190070	109652	176544		226596	238392	17.08	78386	58609.8	105.76	2.89	1.53	0.000621601	3.21	0.0444681	1.80731	124.992	113.9	1.9	Up
M125T281	203867	118916	181529	130346	268992	40488.3	112221	122308	224742	176652	285862	218611	213768	239602	299119	150773		147334	126327	46.98	226141	221677	22.06	0.65	-0.62	0.0206682	1.68	0.184282	1.64086	125.047	281.5	4.7	Down
M126T53	2.38631e+06	1.56388e+06	2.10975e+06	1.64705e+06	1.61054e+06	1.75767e+06	1.72992e+06	1.62802e+06	1.98591e+06	2.3964e+06	2.26323e+06	2.25623e+06	2.19021e+06	1.9781e+06	2.49606e+06	1.73712e+06		1.80414e+06	1.68848e+06	16.1	2.16291e+06	2.22322e+06	11.48	0.83	-0.26	0.0206682	1.68	0.184282	1.78886	125.9	53.1	0.9	Down
M127T506	176341	169332	211622	142561	186507	204927	183497	206150	268111	248639	336138	291099	196616	217834	209703	333985		185117	185002	12.38	262765	258375	20.69	0.7	-0.51	0.0018648	2.73	0.0601903	2.09108	127.113	506.2	8.4	Down
M128T90	2.4054e+08	2.04721e+08	2.19852e+08	3.31498e+08	1.93241e+08	3.18344e+08	2.24223e+08	2.55185e+08	6.03536e+08	2.87818e+08	7.44676e+08	6.85585e+08	5.32798e+08	2.81414e+08	2.02466e+08	2.87851e+08		2.48451e+08	2.32381e+08	20.55	4.53268e+08	4.10325e+08	46.8	0.55	-0.87	0.0498834	1.3	0.285686	1.58159	128.035	90.2	1.5	Down
M129T80	502363	542946	516365	524155	446480	528028	543591	500117	4.11482e+06	557015	9.20505e+06	3.99692e+06	3.86952e+06	561300	539668	540217		513006	520260	6.12	2.92306e+06	2.21541e+06	104.62	0.18	-2.51	0.0018648	2.73	0.0601903	1.63667	129.039	80.4	1.3	Down
M129T96	2.06376e+07	4.44517e+07	1.23191e+07	2.35919e+07	8.54158e+06	2.98458e+07	2.85349e+07	4.96366e+07	1.83041e+07	6.08263e+06	3.61783e+06	1.76936e+07	1.02907e+07	2.03931e+07	3.58129e+06	1.41559e+07		2.71949e+07	2.60634e+07	52.66	1.17649e+07	1.22233e+07	58	2.31	1.21	0.014763	1.83	0.158002	1.8159	129.019	96.4	1.6	Up
M130T125	2.00337e+08	1.97407e+08	1.82967e+08	1.50178e+08	1.56468e+08	2.2004e+08	1.46807e+08	1.5662e+08	4.23315e+08	1.53774e+08	5.03851e+08	4.05527e+08	3.6693e+08	1.84956e+08	1.90288e+08	2.77702e+08		1.76353e+08	1.69794e+08	15.62	3.13293e+08	3.22316e+08	41.46	0.56	-0.83	0.0379176	1.42	0.250052	1.75027	130.087	124.7	2.1	Down
M130T95	8.70642e+08	6.76839e+08	7.86018e+08	6.01109e+08	6.76236e+08	6.34243e+08	7.4099e+08	6.39755e+08	1.08903e+09	7.01387e+08	6.4281e+08	8.93353e+08	9.88955e+08	8.49433e+08	8.18784e+08	7.14778e+08		7.03229e+08	6.76538e+08	12.83	8.37317e+08	8.34109e+08	18.13	0.84	-0.25	0.0498834	1.3	0.285686	1.41936	130.062	94.7	1.6	Down
M131T154	5.43476e+06	3.61116e+06	3.92611e+06	3.8311e+06	3.01238e+06	6.13558e+06	8.10757e+06	6.33591e+06	6.68249e+06	7.01456e+06	4.81245e+06	6.65846e+06	5.94496e+06	8.17863e+06	8.88202e+06	6.44231e+06		5.04932e+06	4.68044e+06	34.55	6.82698e+06	6.67048e+06	18.46	0.74	-0.44	0.0281274	1.55	0.216677	1.52539	131.091	153.7	2.6	Down
M131T90	9.81973e+06	1.39218e+07	1.19268e+07	1.49209e+07	3.96785e+06	1.36491e+07	1.24723e+07	1.4544e+07	7.47245e+06	4.01621e+06	4.13198e+06	8.23469e+06	7.7105e+06	5.27298e+06	8.71975e+06	1.11867e+07		1.19028e+07	1.30607e+07	30.26	7.09316e+06	7.59147e+06	34.85	1.68	0.75	0.014763	1.83	0.158002	1.67317	130.984	90.3	1.5	Up
M132T114	2.31641e+06	720648	406096	1.50593e+06	2.00024e+06	1.53858e+06	1.54002e+06	412330	3.10814e+06	2.77464e+06	2.60572e+06	2.49482e+06	3.3151e+06	3.30909e+06	4.37256e+06	2.81434e+06		1.30503e+06	1.52226e+06	54.97	3.0993e+06	2.96124e+06	19.31	0.42	-1.25	0.0001554	3.81	0.0365579	2.12198	132.012	113.9	1.9	Down
M132T126	216201	152315	212690	93820.1	171956	133384	141445	154936	151030	174711	182478	332964	251930	354714	318724	165076		159594	153626	25.5	241453	217204	34.73	0.66	-0.6	0.0379176	1.42	0.250052	1.56883	132.03	125.6	2.1	Down
M133T250	3.36445e+06	4.75513e+06	3.97097e+06	3.96874e+06	3.51087e+06	3.89958e+06	5.49972e+06	7.11157e+06	4.59366e+06	6.25513e+06	4.92618e+06	7.37428e+06	5.6297e+06	4.40006e+06	5.829e+06	7.2905e+06		4.51013e+06	3.96985e+06	27.89	5.78731e+06	5.72935e+06	19.72	0.78	-0.36	0.0281274	1.55	0.216677	1.43781	133.014	250.5	4.2	Down
M133T363	786827	518574	832887	303939	986792	450267	537088	412924	2.11074e+06	2.0258e+06	3.11884e+06	3.64419e+06	2.40307e+06	661900	1.32452e+06	892140		603662	527831	39.32	2.02265e+06	2.06827e+06	51.52	0.3	-1.74	0.0018648	2.73	0.0601903	2.23006	133.014	362.9	6	Down
M133T56	2.69409e+06	1.3697e+06	2.10022e+06	2.81718e+06	4.81229e+06	1.13076e+07	2.79386e+06	2.59616e+06	1.89024e+07	4.58138e+06	2.68294e+07	2.86001e+06	1.35779e+07	1.57587e+07	2.26961e+07	2.47442e+06		3.81139e+06	2.74398e+06	83.46	1.346e+07	1.46683e+07	69.4	0.28	-1.82	0.0206682	1.68	0.184282	1.7219	132.868	56	0.9	Down
M133T57	294004	447755	498563	399673	420323	414639	338284	348184	152995	113285	130911	418231	360583	386709	179972	158626		395178	407156	16.61	237664	169299	53.59	1.66	0.73	0.0281274	1.55	0.216677	1.98739	132.935	56.9	0.9	Up
M133T81	2.2016e+07	2.05616e+07	2.2419e+07	2.04532e+07	2.4053e+07	1.69592e+07	1.91037e+07	2.4914e+07	2.54205e+07	2.2742e+07	2.38902e+07	2.66277e+07	2.84894e+07	2.10666e+07	2.21203e+07	2.28312e+07		2.131e+07	2.12888e+07	12.2	2.41485e+07	2.33607e+07	10.38	0.88	-0.18	0.0498834	1.3	0.285686	1.47047	132.946	81.3	1.4	Down
M133T97	5.91066e+06	3.17078e+06	1.17765e+07	6.62276e+06	6.72119e+06	7.39393e+06	4.12631e+06	8.17926e+06	1.51727e+07	9.48149e+06	1.04266e+07	9.96327e+06	1.06285e+07	7.47106e+06	1.27404e+07	1.00707e+07		6.73767e+06	6.67197e+06	38.92	1.07443e+07	1.02486e+07	21.42	0.63	-0.67	0.00699301	2.16	0.1064	1.88878	133.051	96.9	1.6	Down
M134T284	277476	172603	304369	178272	266756	222121	149685	191520	675664	350815	630425	641157	638498	139731	297484	490802		220350	206821	25.65	483072	560613	41.24	0.46	-1.13	0.014763	1.83	0.158002	1.93158	134.018	284.3	4.7	Down
M134T31	109799	83215.4	84846.8	75606.7	40045.8	108590	77478.2	80461.4	72422.3	34329.1	62755.9	86169.8	71778.8	65044.1	59578.6	50425.6		82505.4	81838.4	26.36	62813	63900	24.8	1.31	0.39	0.0379176	1.42	0.250052	1.33235	133.924	30.8	0.5	Up
M135T122	7.25102e+08	3.45646e+08	6.32078e+08	3.78718e+08	5.68606e+08	5.02071e+08	3.97222e+08	4.50551e+08	1.0408e+09	4.28482e+08	1.23418e+09	9.03516e+08	8.05714e+08	4.61979e+08	7.47568e+08	8.28155e+08		4.99999e+08	4.76311e+08	26.66	8.063e+08	8.16934e+08	33.57	0.62	-0.69	0.014763	1.83	0.158002	1.79206	135.031	121.9	2	Down
M135T138	4.38932e+06	4.10587e+06	6.00783e+06	4.6074e+06	4.95284e+06	4.25771e+06	5.49663e+06	5.99967e+06	1.05349e+07	7.04616e+06	9.04101e+06	9.48149e+06	7.76401e+06	5.72029e+06	5.52676e+06	7.28954e+06		4.97716e+06	4.78012e+06	15.45	7.80052e+06	7.52677e+06	22.81	0.64	-0.65	0.0018648	2.73	0.0601903	2.16055	134.865	137.6	2.3	Down
M135T251	9.96338e+06	8.46037e+06	8.23732e+06	9.64474e+06	9.06224e+06	7.25706e+06	9.07342e+06	1.25201e+07	1.66058e+07	1.72787e+07	1.73214e+07	1.1133e+07	1.04882e+07	1.181e+07	1.19522e+07	1.04026e+07		9.27733e+06	9.06783e+06	16.82	1.3374e+07	1.18811e+07	23.29	0.69	-0.53	0.0029526	2.53	0.0725285	2.03209	135.032	250.6	4.2	Down
M135T327	105381	114374	80964.6	164261	120801	101575	110761	93647.2	100472	80174.4	26809	97358.1	92933.5	107092	91239.1	94594.6		111471	108071	22.15	86334.2	93764.1	29.27	1.29	0.37	0.0379176	1.42	0.250052	1.2983	135.051	326.6	5.4	Up
M135T37	9.78266e+06	1.3783e+07	1.08153e+07	3.74986e+06	4.59806e+06	8.80815e+06	5.39624e+06	5.33998e+06	1.45106e+07	1.12068e+07	1.46226e+07	1.55261e+07	1.91079e+07	4.9031e+06	1.82646e+07	1.38659e+07		7.78415e+06	7.1022e+06	45.63	1.40009e+07	1.45666e+07	31.69	0.56	-0.85	0.00699301	2.16	0.1064	1.75079	134.865	37	0.6	Down
M135T74	1.80869e+07	1.87475e+07	3.81093e+07	3.90375e+07	3.03987e+07	3.55017e+07	1.36906e+07	2.50433e+07	6.27361e+06	1.10773e+07	4.75608e+06	1.39061e+07	3.45858e+06	1.85738e+07	7.74883e+06	2.62933e+07		2.73269e+07	2.7721e+07	36.06	1.15109e+07	9.41305e+06	67.8	2.37	1.25	0.00699301	2.16	0.1064	2.01302	135.018	74.4	1.2	Up
M135T836	5.12579e+07	4.97078e+07	5.41806e+07	4.65446e+07	6.6959e+07	7.4146e+07	5.76954e+07	5.50257e+07	4.447e+07	4.79296e+07	5.21347e+07	5.89717e+07	2.44771e+07	2.53498e+07	5.10756e+07	1.64838e+07		5.69396e+07	5.46031e+07	16.27	4.01115e+07	4.61998e+07	39.09	1.42	0.51	0.0379176	1.42	0.250052	1.55462	134.895	836.4	13.9	Up
M136T102	1.16975e+07	8.96432e+06	9.48155e+06	2.96316e+06	2.659e+06	9.09654e+06	4.72576e+06	1.05709e+07	2.42797e+06	1.84231e+06	549531	5.65906e+06	1.90617e+06	8.60479e+06	1.89674e+06	9.47766e+06		7.51984e+06	9.03043e+06	46.98	4.04553e+06	2.16707e+06	84.49	1.86	0.89	0.0281274	1.55	0.216677	1.47612	135.971	102	1.7	Up
M136T766	1.54616e+06	723676	2.12318e+06	1.02904e+06	1.35249e+06	2.70697e+06	777434	2.08222e+06	2.40213e+06	2.04384e+06	2.15e+06	2.36023e+06	1.71571e+06	2.82692e+06	2.15285e+06	1.80103e+06		1.54265e+06	1.44932e+06	46.1	2.18159e+06	2.15142e+06	16.25	0.71	-0.5	0.0498834	1.3	0.285686	1.5168	135.971	766.4	12.8	Down
M137T148	761067	353554	603259	819039	1.21005e+06	646621	741214	657046	1.00815e+06	1.24207e+06	1.62402e+06	1.08183e+06	915750	1.23177e+06	1.01815e+06	836134		723982	699130	33.4	1.11974e+06	1.04999e+06	22.08	0.65	-0.63	0.0029526	2.53	0.0725285	1.9136	137.036	147.7	2.5	Down
M137T94	6.46183e+06	9.45211e+06	8.24182e+06	9.05429e+06	9.78259e+06	8.49095e+06	9.93269e+06	1.04215e+07	5.36469e+06	7.15985e+06	6.92925e+06	5.04927e+06	4.01403e+06	6.4375e+06	5.85953e+06	6.60081e+06		8.97973e+06	9.2532e+06	13.95	5.92687e+06	6.14852e+06	18.03	1.52	0.6	0.0010878	2.96	0.0513787	2.23802	137.036	93.5	1.6	Up
M138T336	1.29203e+06	1.56399e+06	1.16116e+06	1.25517e+06	854125	1.40994e+06	1.75078e+06	1.03292e+06	808772	680694	604264	983569	481560	949010	661282	948159		1.29001e+06	1.2736e+06	22.23	764664	744733	24.27	1.69	0.75	0.0010878	2.96	0.0513787	2.2278	138.056	335.9	5.6	Up
M138T611	3.10234e+06	1.97407e+06	3.19539e+06	1.929e+06	2.34916e+06	1.61692e+06	2.19494e+06	2.71087e+06	3.86781e+06	3.4782e+06	3.76097e+06	3.47931e+06	3.1562e+06	2.00974e+06	4.6024e+06	2.36283e+06		2.38409e+06	2.27205e+06	23.95	3.33968e+06	3.47875e+06	24.91	0.71	-0.49	0.014763	1.83	0.158002	1.74117	138.02	611	10.2	Down
M139T611	213525	144513	233003	197279	148817	110538	139632	172228	305191	213613	272978	412434	346440	150013	121231	265877		169942	160522	24.53	260972	269427	37.33	0.65	-0.62	0.0379176	1.42	0.250052	1.44767	139.023	611.1	10.2	Down
M139T77	2.79099e+06	3.31417e+06	3.08784e+06	4.57273e+06	3.50302e+06	3.01438e+06	3.6046e+06	3.50364e+06	2.72947e+06	2.61033e+06	2.57791e+06	3.29703e+06	2.30551e+06	3.33008e+06	2.72931e+06	2.27649e+06		3.42392e+06	3.40859e+06	15.84	2.73202e+06	2.66982e+06	14.54	1.25	0.33	0.00699301	2.16	0.1064	1.96132	138.98	77	1.3	Up
M141T118	127041	446697	150041	130139	359959	150040	116350	129128	89329.2	68174	228538	439180	97582.2	97736.6	76492	103364		201174	140090	63.34	150050	97659.4	84.76	1.34	0.42	0.0498834	1.3	0.285686	1.00681	141.086	118.2	2	Up
M141T120	853338	613616	605962	871488	682937	583528	623028	655253	404199	281718	611127	585088	474844	646333	668068	171681		686144	639140	16.48	480382	529966	37.85	1.43	0.51	0.0379176	1.42	0.250052	1.60603	141.019	120.1	2	Up
M141T82_2	2.59594e+06	4.07514e+06	3.69958e+06	3.93039e+06	2.85098e+06	3.7637e+06	4.15162e+06	3.42899e+06	2.34385e+06	2.48263e+06	1.85007e+06	3.37234e+06	3.55857e+06	2.8831e+06	2.90383e+06	3.00674e+06		3.56204e+06	3.73164e+06	15.96	2.80014e+06	2.89346e+06	19.9	1.27	0.35	0.0281274	1.55	0.216677	1.75219	141.056	81.5	1.4	Up
M142T363	184857	168289	143963	142309	168282	162394	193796	144309	131884	156828	132002	110571	81897.9	137613	204254	106846		163525	165338	11.83	132737	131943	27.7	1.23	0.3	0.0281274	1.55	0.216677	1.36531	142.066	363.2	6.1	Up
M144T122	4.94947e+06	3.01602e+06	5.4976e+06	5.00307e+06	2.3764e+06	3.82512e+06	2.53505e+06	3.21234e+06	1.85013e+06	764182	2.19901e+06	1.86644e+06	1.42021e+06	4.36629e+06	2.25332e+06	3.61473e+06		3.80188e+06	3.51873e+06	31.81	2.29179e+06	2.03272e+06	50.92	1.66	0.73	0.014763	1.83	0.158002	1.66371	144.067	122.4	2	Up
M144T89	1.83776e+06	1.5949e+06	2.69754e+06	1.60034e+06	1.10755e+06	2.19858e+06	1.96261e+06	2.48814e+06	2.47476e+06	2.17884e+06	4.56287e+06	3.92228e+06	3.39834e+06	2.1064e+06	2.14121e+06	2.34248e+06		1.93593e+06	1.90018e+06	26.77	2.8909e+06	2.40862e+06	32.75	0.67	-0.58	0.0498834	1.3	0.285686	1.60655	144.03	88.6	1.5	Down
M144T92	1.34679e+07	8.90516e+06	7.57314e+06	9.50984e+06	6.11557e+06	1.04131e+07	8.23051e+06	6.69536e+06	8.93584e+06	4.82403e+06	2.2256e+07	1.4164e+07	1.5548e+07	1.19984e+07	1.25897e+07	1.7971e+07		8.86383e+06	8.56784e+06	26.4	1.35359e+07	1.33769e+07	39.54	0.65	-0.61	0.0498834	1.3	0.285686	1.29918	144.067	91.7	1.5	Down
M145T148	1.43855e+06	1.40401e+06	1.41706e+06	1.33219e+06	1.54338e+06	1.24901e+06	1.30402e+06	1.46366e+06	1.54908e+06	1.3727e+06	1.56913e+06	1.70869e+06	1.53794e+06	1.5662e+06	2.06173e+06	1.48232e+06		1.39399e+06	1.41053e+06	6.79	1.60597e+06	1.55764e+06	12.86	0.87	-0.2	0.00699301	2.16	0.1064	1.71761	144.992	148.1	2.5	Down
M145T374	1.28885e+06	208956	969767	1.72374e+06	1.21834e+06	1.53691e+06	836852	286885	258814	562336	572984	324081	70676.9	121422	745945	281149		1.00879e+06	1.09405e+06	54.35	367176	302615	64.55	2.75	1.46	0.0206682	1.68	0.184282	1.53714	145.014	373.8	6.2	Up
M145T399	1.28253e+06	1.71177e+06	1.83034e+06	1.93339e+06	2.51714e+06	2.96245e+06	1.40454e+06	1.06863e+06	1.04777e+06	95506.8	994115	613899	961192	1.25708e+06	37936.8	883486		1.83885e+06	1.77106e+06	34.63	736373	922339	61.17	2.5	1.32	0.0003108	3.51	0.040447	1.7579	145.087	398.9	6.6	Up
M145T768	269397	2.91938e+06	17553.5	199776	7.00346e+06	1.37153e+06	2.18762e+06	5.75936e+06	1.0985e+07	7.441e+07	3.14472e+07	2.51474e+06	7.79056e+06	932643	2.57786e+07	5.11911e+06		2.46601e+06	1.77958e+06	107.15	1.98722e+07	9.3878e+06	123.93	0.12	-3.01	0.0206682	1.68	0.184282	1.71697	144.992	767.8	12.8	Down
M145T96	615228	574043	512674	620941	483410	850154	690671	649558	3.0325e+06	741789	3.74994e+06	1.90059e+06	2.48565e+06	793161	993761	704619		624585	618085	18.25	1.80025e+06	1.44718e+06	65.67	0.35	-1.53	0.0010878	2.96	0.0513787	1.90044	145.014	96.3	1.6	Down
M146T109	1.45516e+06	2.83218e+06	2.36544e+06	2.72192e+06	2.42266e+06	2.66894e+06	3.3697e+06	4.62258e+06	1.58146e+06	2.53979e+06	1.20344e+06	845271	1.68849e+06	1.56151e+06	1.32792e+06	1.86715e+06		2.80732e+06	2.69543e+06	32.45	1.57688e+06	1.57148e+06	31.81	1.78	0.83	0.00699301	2.16	0.1064	1.94576	146.054	109.4	1.8	Up
M146T224	76981.3	75392.1	69097.1	118475	87572.3	54255.7	67822.7	45172.9	32630.7	31486.6	51636.2	76586.2	46321.3	64898.6	61583.8	28999.6		74346.1	72244.6	29.88	49267.9	48978.8	35.66	1.51	0.59	0.0281274	1.55	0.216677	1.70777	146.061	223.8	3.7	Up
M146T87	1.23709e+07	1.93637e+07	1.2083e+07	1.25802e+07	5.52499e+06	1.94844e+07	1.14481e+07	9.81145e+06	5.68172e+07	9.75492e+06	2.78468e+07	2.79012e+07	4.84734e+07	1.6479e+07	1.45893e+07	2.60939e+07		1.28333e+07	1.2227e+07	36.33	2.84945e+07	2.69704e+07	57.77	0.45	-1.15	0.0281274	1.55	0.216677	1.63079	146.065	87	1.4	Down
M147T104_2	2.99937e+06	4.49431e+06	3.73107e+06	2.39117e+06	2.39574e+06	4.29078e+06	3.86457e+06	3.22156e+06	839199	2.60043e+06	1.35267e+06	1.14097e+06	1.2407e+06	2.3095e+06	2.05316e+06	2.4978e+06		3.42357e+06	3.47632e+06	23.5	1.7543e+06	1.70292e+06	39.17	1.95	0.96	0.0018648	2.73	0.0601903	2.07114	146.961	104.3	1.7	Up
M147T70	1.96368e+06	2.06237e+06	2.17925e+06	2.2695e+06	2.02591e+06	1.57842e+06	1.61086e+06	1.97346e+06	1.69448e+06	1.42902e+06	1.90925e+06	1.93889e+06	1.79133e+06	1.72932e+06	1.55419e+06	1.92315e+06		1.95793e+06	1.99968e+06	12.6	1.7462e+06	1.76032e+06	10.55	1.12	0.17	0.0379176	1.42	0.250052	1.30526	146.938	69.6	1.2	Up
M147T773	587308	395649	654475	681644	321778	312277	326144	334760	1.75409e+06	444554	1.60269e+06	1.00876e+06	1.16887e+06	595518	966883	1.00438e+06		451754	365205	35.62	1.06822e+06	1.00657e+06	41.81	0.42	-1.24	0.0029526	2.53	0.0725285	2.10773	146.994	773.2	12.9	Down
M148T285	1.19905e+06	1.58159e+06	1.49426e+06	1.35317e+06	1.11232e+06	2.0756e+06	1.53379e+06	1.3734e+06	595235	1.22825e+06	818570	958079	960670	683061	874829	1.11341e+06		1.4654e+06	1.43383e+06	20.11	904014	916454	23.18	1.62	0.7	0.0010878	2.96	0.0513787	2.18897	148.049	284.9	4.7	Up
M150T104	155760	187435	148499	119726	236160	120186	154647	489806	58780.1	81138.5	25648.9	28789.2	27982	145186	120986	119238		201527	155204	60.75	75968.7	69959.3	63.08	2.65	1.41	0.0018648	2.73	0.0601903	1.9225	150.003	104.2	1.7	Up
M150T122_1	104517	522362	120966	495221	41604.9	764087	71736.3	104147	3.16722e+06	32139.7	2.73104e+06	2.49617e+06	2.33996e+06	616737	515506	1.07648e+06		278080	112741	98.63	1.62191e+06	1.70822e+06	73.54	0.17	-2.54	0.0281274	1.55	0.216677	1.47724	150.023	121.6	2	Down
M150T122_2	302020	428627	349109	403696	116802	594719	201168	250085	2.96191e+06	92855.3	3.1091e+06	2.29315e+06	2.098e+06	571066	442340	813154		330778	325564	44.96	1.5477e+06	1.45558e+06	77.72	0.21	-2.23	0.0206682	1.68	0.184282	1.50504	150.04	121.6	2	Down
M150T176	187784	288251	245898	211085	350546	287781	294877	249960	425813	463847	459189	341327	392348	343271	334669	458700		264523	268870	19.55	402395	409080	14.13	0.66	-0.61	0.0010878	2.96	0.0513787	2.29455	150.042	175.6	2.9	Down
M150T617	128242	59516.7	67516.2	67572.8	40145.2	65519.7	99183.6	111038	39922.9	49989.8	34524.9	11949.6	32403.8	50591.4	110301	60392.3		79841.7	67544.5	37.23	48759.5	44956.4	59.19	1.64	0.71	0.0206682	1.68	0.184282	1.3388	150.064	617.3	10.3	Up
M151T82	1.02401e+07	1.00529e+07	1.31164e+07	9.81043e+06	9.39161e+06	9.00173e+06	8.96675e+06	9.06621e+06	1.26698e+07	9.13033e+06	1.5317e+07	1.3188e+07	1.14983e+07	1.05903e+07	9.4752e+06	1.3355e+07		9.95576e+06	9.60102e+06	13.74	1.1903e+07	1.20841e+07	17.81	0.84	-0.26	0.0379176	1.42	0.250052	1.45893	150.887	82.4	1.4	Down
M152T122	4.58647e+07	5.48144e+07	5.93955e+07	5.31069e+07	5.35677e+07	4.97908e+07	5.19058e+07	6.59081e+07	2.72089e+07	5.06899e+07	2.61828e+07	2.80666e+07	2.76364e+07	4.74585e+07	3.6402e+07	4.81852e+07		5.42942e+07	5.33373e+07	11.23	3.64788e+07	3.22343e+07	29.31	1.49	0.57	0.0018648	2.73	0.0601903	2.03717	152.029	121.7	2	Up
M152T151	1.10921e+07	7.4318e+06	1.11137e+07	8.03653e+06	9.897e+06	7.40869e+06	8.12654e+06	9.11385e+06	9.4516e+06	7.55732e+06	9.28546e+06	1.16065e+07	1.15596e+07	1.20178e+07	1.33046e+07	1.13999e+07		9.02752e+06	8.6202e+06	16.92	1.07729e+07	1.14798e+07	17.18	0.84	-0.25	0.0379176	1.42	0.250052	1.37174	152.029	151	2.5	Down
M152T523	977501	787604	1.62722e+06	583180	208140	756673	332761	332269	319505	45434.5	157389	92450.2	249238	476742	29672.6	451353		700669	669926	65.48	227723	203314	77.25	3.08	1.62	0.0104118	1.98	0.130233	1.80316	152.044	522.7	8.7	Up
M152T91_1	567950	505517	531428	510835	563293	445026	555026	560251	587830	622273	581804	612660	577542	545796	561929	573161		529916	543227	7.9	582874	579673	4.3	0.91	-0.14	0.004662	2.33	0.0886941	1.84543	151.982	90.6	1.5	Down
M153T355	1.25665e+06	324986	801366	283477	652803	280201	469793	1.02972e+06	2.08e+06	916994	2.65673e+06	2.30936e+06	1.87405e+06	1.05017e+06	2.01064e+06	771477		637375	561298	57.59	1.70868e+06	1.94235e+06	41.12	0.37	-1.42	0.004662	2.33	0.0886941	2.11271	153.021	355.5	5.9	Down
M153T82	8.99562e+06	8.3841e+06	1.02751e+07	8.2215e+06	9.15417e+06	9.18345e+06	9.02989e+06	8.08038e+06	2.03599e+07	8.81005e+06	2.11275e+07	1.50338e+07	9.14246e+06	9.62953e+06	9.24171e+06	1.5632e+07		8.91552e+06	9.01276e+06	7.88	1.36221e+07	1.23317e+07	37.85	0.65	-0.61	0.0206682	1.68	0.184282	1.68185	152.884	82.4	1.4	Down
M154T742	1.12261e+07	8.92348e+06	1.72605e+07	7.56154e+06	4.01651e+06	1.1799e+07	6.62827e+06	8.92584e+06	7.42537e+06	3.43461e+06	2.87803e+06	7.72438e+06	1.17708e+07	4.40701e+06	3.8474e+06	6.60885e+06		9.54266e+06	8.92466e+06	41.77	6.01206e+06	5.50793e+06	49.57	1.59	0.67	0.0498834	1.3	0.285686	1.4555	153.992	741.8	12.4	Up
M154T760	154144	194855	222225	196995	92052.1	256630	267598	290981	263844	487697	302548	328752	303961	292427	253762	368478		209435	209610	31.06	325183	303254	23.01	0.64	-0.63	0.0029526	2.53	0.0725285	1.7775	154.064	760	12.7	Down
M155T393	5.38676e+06	5.5437e+06	5.72237e+06	7.26666e+06	1.39784e+06	7.7423e+06	6.85084e+06	8.46267e+06	1.06027e+07	9.42242e+06	1.12168e+07	5.4536e+06	9.56834e+06	1.26341e+07	1.3317e+07	1.0283e+07		6.04664e+06	6.2866e+06	36.05	1.03122e+07	1.04429e+07	23.26	0.59	-0.77	0.004662	2.33	0.0886941	1.63567	155.035	393.4	6.6	Down
M155T82_2	1.26549e+07	1.64919e+07	1.24781e+07	1.23587e+07	1.35314e+07	1.26934e+07	1.09996e+07	1.12163e+07	1.0052e+07	9.4487e+06	9.45146e+06	1.03409e+07	9.27131e+06	1.05687e+07	9.50918e+06	9.97554e+06		1.2803e+07	1.25665e+07	13.28	9.82721e+06	9.74236e+06	4.84	1.3	0.38	0.0001554	3.81	0.0365579	2.37476	154.928	82	1.4	Up
M155T97	4.3075e+06	2.78292e+06	5.45155e+06	4.72846e+06	2.17168e+06	4.39514e+06	3.40424e+06	3.83351e+06	6.87709e+06	4.45472e+06	9.9539e+06	6.11569e+06	7.4853e+06	4.51766e+06	4.55876e+06	3.78679e+06		3.88437e+06	4.0705e+06	27.5	5.96874e+06	5.33723e+06	34.79	0.65	-0.62	0.0281274	1.55	0.216677	1.62334	155.01	96.7	1.6	Down
M156T326	69069.7	33360.9	63390.7	36900.4	71687	19747	39491.7	46922.1	131094	89368.6	218941	86448	83016.6	36813.3	103230	92263		47571.2	43206.9	39.32	105147	90815.8	50.26	0.45	-1.14	0.004662	2.33	0.0886941	2.00979	156.042	326	5.4	Down
M156T393	503684	392645	529610	384078	420837	458538	444699	191771	568194	477636	578975	568303	397072	495293	524621	529357		415733	432768	24.91	517431	526989	11.71	0.8	-0.32	0.0281274	1.55	0.216677	1.43681	156.038	393.4	6.6	Down
M157T82	2.96584e+06	4.05206e+06	4.15799e+06	1.21877e+06	3.3757e+06	1.97462e+06	2.17172e+06	2.16365e+06	3.29195e+06	4.32168e+06	5.60719e+06	4.03977e+06	3.57032e+06	3.96073e+06	3.81388e+06	6.08204e+06		2.76004e+06	2.56878e+06	38.1	4.33595e+06	4.00025e+06	22.8	0.64	-0.65	0.0281274	1.55	0.216677	1.89823	156.925	82	1.4	Down
M158T285	573859	802069	355274	666106	895880	694104	722663	653981	212990	968384	275454	343144	313797	361404	494086	390618		670492	680105	23.94	419985	352274	56.31	1.6	0.67	0.0281274	1.55	0.216677	1.69604	157.931	285.2	4.8	Up
M158T431	31185.7	10271.1	35898.2	6916.57	34873.7	13483.4	12369.6	9908.59	57514.9	33202.8	113896	102147	55164.3	20253	41029.3	23925.9		19363.4	12926.5	63.68	55891.6	48096.8	62.47	0.35	-1.53	0.0104118	1.98	0.130233	1.97328	158.119	430.5	7.2	Down
M158T461	70454.6	68016.4	114102	49951.3	88182.7	53554.1	48804.6	53645.8	102126	90768.6	115285	130982	84416.2	61365	81182.8	104444		68339	60831.1	33.4	96321.3	96447.4	22.49	0.71	-0.5	0.0281274	1.55	0.216677	1.72844	158.065	461	7.7	Down
M159T453	89863.8	49147.2	85105.3	52187.6	16097.7	105550	61088.9	97131.1	48402.2	40937.9	35677.7	41328.9	29809.4	3708.12	23611.1	10199.6		69521.5	73097.1	43.35	29209.4	32743.6	53.95	2.38	1.25	0.004662	2.33	0.0886941	1.58172	159.082	453.4	7.6	Up
M159T497	1.89376e+06	1.41442e+06	1.02367e+06	533320	2.00907e+06	899520	248339	656049	3.98974e+06	2.19981e+06	5.91859e+06	6.88868e+06	5.03986e+06	1.31271e+06	2.36627e+06	1.3248e+06		1.08477e+06	961595	58.75	3.63006e+06	3.178e+06	59.18	0.3	-1.74	0.004662	2.33	0.0886941	1.99125	159.102	496.6	8.3	Down
M160T116	796158	1.23012e+06	2.04666e+06	2.9759e+06	3.30042e+06	1.38856e+06	2.30031e+06	3.43959e+06	1.23752e+06	585484	1.09055e+06	2.89182e+06	587396	1.65748e+06	1.13919e+06	580221		2.18472e+06	2.17349e+06	45.61	1.22121e+06	1.11487e+06	63.6	1.79	0.84	0.0379176	1.42	0.250052	1.62255	160.061	116.2	1.9	Up
M160T431	20308.9	273514	356128	244019	182856	119125	41635.6	164540	193583	492154	294802	298062	195328	385805	700122	343181		175266	173698	65.51	362880	320622	46.22	0.48	-1.05	0.014763	1.83	0.158002	1.52117	160.052	430.9	7.2	Down
M160T497	501204	525762	520633	548746	363619	217616	581115	582894	287394	384004	399665	411253	377152	109911	164083	240853		480199	523198	26.36	296790	332273	38.94	1.62	0.69	0.0206682	1.68	0.184282	1.55322	160.106	496.6	8.3	Up
M160T99_1	1.4237e+06	307355	2.12785e+06	1.3481e+06	332435	1.33247e+06	347271	1.05224e+06	285527	237710	1.09103e+06	327083	326770	1.6078e+06	253673	255093		1033929	1.19236e+06	63.61	548085	306148	93.88	1.89	0.92	0.0498834	1.3	0.285686	1.27063	159.979	99.3	1.7	Up
M161T32	85247.7	87349.2	211653	72442.2	67865	193712	88638.1	101060	120927	344238	246062	141865	267807	96744.7	580369	80200.8		113496	87993.7	49.5	234777	193963	71.49	0.48	-1.05	0.0498834	1.3	0.285686	1.48001	160.893	31.6	0.5	Down
M161T70	1.20495e+06	1.46742e+06	1.36287e+06	1.56179e+06	1.67817e+06	1.30931e+06	1.41775e+06	1.26588e+06	1.18393e+06	980073	1.2906e+06	326597	1.23175e+06	1.34032e+06	1.09576e+06	1.36495e+06		1.40852e+06	1.39031e+06	11.18	1.10175e+06	1.20784e+06	30.71	1.28	0.35	0.0206682	1.68	0.184282	1.12961	161.009	70.3	1.2	Up
M161T82	1.03594e+08	9.78322e+07	9.74236e+07	1.00784e+08	8.65761e+07	8.19698e+07	1.25811e+08	1.11373e+08	1.21665e+07	1.38698e+08	2.1927e+07	1.857e+07	2.29689e+07	7.50433e+07	8.59222e+07	7.00444e+07		1.0067e+08	9.93083e+07	13.65	5.56676e+07	4.65067e+07	79.96	1.81	0.85	0.014763	1.83	0.158002	1.64959	160.842	81.8	1.4	Up
M162T91_1	235669	270447	327992	235242	249574	293981	207248	244970	428476	263687	531599	784301	527295	314086	208136	336637		258140	247272	14.77	424277	382557	44.01	0.61	-0.72	0.0281274	1.55	0.216677	1.53907	162.049	91.3	1.5	Down
M163T310	234664	363525	349081	348178	196312	330641	131588	72376	371494	559790	511388	292014	374210	364187	301560	280781		253296	282652	44.13	381928	367841	26.86	0.66	-0.59	0.0379176	1.42	0.250052	1.48295	162.894	309.7	5.2	Down
M163T384	1.78938e+07	2.80896e+07	2.58863e+07	2.33196e+07	1.15545e+07	2.83066e+07	2.89112e+07	2.92823e+07	1.85013e+07	8.95812e+06	1.62402e+07	2.48994e+07	2.09258e+07	2.25254e+07	4.11873e+06	2.35236e+07		2.41555e+07	2.6988e+07	26.34	1.74616e+07	1.97136e+07	42.34	1.38	0.47	0.0498834	1.3	0.285686	1.30175	162.839	384.4	6.4	Up
M163T655	5.80627e+07	1.5783e+07	5.7012e+07	1.21467e+07	6.26239e+07	1.73282e+07	2.4608e+07	2.75027e+07	2.37533e+08	4.80454e+07	1.85762e+08	9.51796e+07	2.20797e+08	1.45951e+07	2.71923e+08	1.1456e+08		3.43834e+07	2.60554e+07	61.64	1.48549e+08	1.50161e+08	63.25	0.23	-2.11	0.0206682	1.68	0.184282	1.96449	162.839	655.1	10.9	Down
M164T82	1.33919e+06	919576	1.00267e+06	1.00403e+06	1.15195e+06	996315	1.22864e+06	1.11657e+06	1.57298e+06	1.66497e+06	1.83807e+06	1.22212e+06	1.38599e+06	1.45331e+06	2.3586e+06	1.28632e+06		1.09487e+06	1.0603e+06	12.85	1.59779e+06	1.51315e+06	23	0.69	-0.55	0.0010878	2.96	0.0513787	2.22985	163.839	81.8	1.4	Down
M164T83	1.61481e+06	1.20346e+06	816966	598640	1.12045e+06	926911	1.00061e+06	1.06833e+06	1.24205e+06	1.39724e+06	1.96359e+06	1.89008e+06	1.5217e+06	1.3144e+06	1.36586e+06	1.55443e+06		1043773	1.03447e+06	28.59	1.53117e+06	1.45947e+06	17.32	0.68	-0.55	0.004662	2.33	0.0886941	1.99073	163.991	83.5	1.4	Down
M165T141	362547	267954	321915	203511	255230	221189	150068	172110	856411	471683	1.33516e+06	1.31039e+06	1.02215e+06	279979	364378	468767		244316	238209	29.75	763615	664047	55.7	0.32	-1.64	0.000621601	3.21	0.0444681	2.15778	164.836	141.1	2.4	Down
M165T344	3.12915e+06	3.54771e+06	2.55957e+06	3.0443e+06	3.14074e+06	3.1504e+06	3.44592e+06	3.19962e+06	1.99873e+06	3.17074e+06	2.2331e+06	1.92829e+06	2.1114e+06	1.62261e+06	1.82414e+06	2.02195e+06		3.15218e+06	3.14557e+06	9.35	2.11387e+06	2.01034e+06	21.99	1.49	0.58	0.0029526	2.53	0.0725285	2.26813	165.056	343.9	5.7	Up
M165T385	2.19578e+06	2.3308e+06	2.08298e+06	2.01872e+06	2.34297e+06	2.36525e+06	2.20696e+06	2.02154e+06	1.63763e+06	2.22454e+06	1.93212e+06	2.01462e+06	2.06901e+06	1.85623e+06	1.8432e+06	1.80144e+06		2.19563e+06	2.20137e+06	6.51	1.92235e+06	1.89417e+06	9.38	1.14	0.19	0.00699301	2.16	0.1064	1.8645	164.836	385.1	6.4	Up
M165T654	3.39992e+07	2.36677e+07	8.44074e+06	1.54713e+07	2.35512e+07	3.556e+07	3.94413e+07	1.92804e+07	4.52888e+07	5.51119e+07	4.12699e+07	2.81728e+07	3.583e+07	6.19149e+07	2.07408e+07	6.27112e+07		2.49265e+07	2.36094e+07	42.96	4.388e+07	4.32793e+07	35.11	0.57	-0.82	0.014763	1.83	0.158002	1.6595	164.835	654.5	10.9	Down
M165T698	1.35483e+07	8.63177e+06	1.2579e+07	8.10819e+06	3.67099e+06	1.05385e+07	9.93911e+06	1.06329e+07	2.01229e+07	1.07073e+07	2.19856e+07	3.0447e+07	3.00728e+07	1.40127e+07	1.79801e+07	1.21414e+07		9.7061e+06	1.02388e+07	31.34	1.96837e+07	1.90515e+07	38.49	0.49	-1.02	0.0018648	2.73	0.0601903	1.89345	164.836	697.7	11.6	Down
M165T731	107149	145276	344523	328860	178382	382629	471411	245895	410969	607403	583277	269358	477307	461973	292530	394463		275516	287378	46.13	437160	436471	27.9	0.63	-0.67	0.0281274	1.55	0.216677	1.56247	165.092	730.8	12.2	Down
M165T83	1.35278e+06	1.23174e+06	1.18989e+06	1.09963e+06	1.18775e+06	1.48061e+06	1.26128e+06	1.25936e+06	1.00359e+06	1.12843e+06	1.19136e+06	1.0965e+06	1.16638e+06	1.02811e+06	1.16258e+06	1.06114e+06		1.25788e+06	1.24555e+06	9.21	1.10476e+06	1.11247e+06	6.24	1.14	0.19	0.004662	2.33	0.0886941	1.8136	164.957	83.3	1.4	Up
M165T96	290854	611064	286051	417664	43155.9	152354	465611	118915	1.06617e+07	81429.7	4.89185e+06	1.06024e+07	5.99123e+06	478819	295124	1.08859e+06		298209	288453	64.48	4.2614e+06	2.99022e+06	105.74	0.07	-3.84	0.0281274	1.55	0.216677	1.5732	165.041	95.9	1.6	Down
M166T109	1.67113e+06	1.68448e+06	1.75302e+06	2.28571e+06	1.72911e+06	1.79224e+06	1.7549e+06	1.64254e+06	1.60965e+06	1.05811e+06	1.21257e+06	1.65669e+06	1.36713e+06	1.48941e+06	1.27682e+06	859884		1.78914e+06	1.74106e+06	11.55	1.31628e+06	1.32198e+06	20.74	1.36	0.44	0.0003108	3.51	0.040447	2.13552	166.051	109	1.8	Up
M166T119	362780	1.34093e+06	676763	1.01134e+06	726803	1.38814e+06	1.80872e+06	1.7454e+06	906191	293734	929118	446946	758265	327436	410813	659794		1.13261e+06	1.17614e+06	46.25	591537	553370	43.21	1.91	0.94	0.0379176	1.42	0.250052	1.62454	166.018	119	2	Up
M166T303	741790	604717	829980	550889	572781	1.10808e+06	1.09947e+06	1.13072e+06	459770	580002	473967	444871	358448	661803	651146	372823		829803	785885	30.32	500354	466869	23.52	1.66	0.73	0.0104118	1.98	0.130233	1.96455	166.076	303.4	5.1	Up
M166T433	503103	1.27238e+06	1.52537e+06	1.29019e+06	1.31502e+06	1.95206e+06	1.3423e+06	1.96111e+06	1.20722e+06	231652	452210	1.18792e+06	1.84515e+06	1.10217e+06	874874	1.06698e+06		1.39519e+06	1.32866e+06	32.94	996023	1.08458e+06	49.67	1.4	0.49	0.0281274	1.55	0.216677	1.23887	165.986	432.8	7.2	Up
M166T549	205310	244135	258663	228533	196084	317916	257630	253012	197669	65155.8	186841	180039	202902	69305.9	203958	269329		245160	248573	15.39	171900	192255	40.75	1.43	0.51	0.0206682	1.68	0.184282	1.48312	166.087	549.1	9.2	Up
M166T82	2.80916e+07	3.08725e+07	3.44719e+07	2.97272e+07	2.88856e+07	2.16311e+07	2.8365e+07	2.60001e+07	3.06128e+07	3.93059e+07	4.11466e+07	2.85313e+07	3.50807e+07	2.22219e+07	3.73742e+07	4.87091e+07		2.85056e+07	2.86253e+07	13.03	3.53728e+07	3.62275e+07	23.24	0.81	-0.31	0.0498834	1.3	0.285686	1.50951	166.044	81.5	1.4	Down
M167T108	679432	615577	403654	493979	653380	329999	632086	425229	686699	685257	747269	723438	777747	558664	914572	669280		529167	554778	25.1	720366	705069	14.16	0.73	-0.45	0.0029526	2.53	0.0725285	1.8986	167.046	108.2	1.8	Down
M167T588	2.09189e+06	2.98995e+06	1.88263e+06	2.19912e+06	159082	2.20829e+06	4.03773e+06	5.12861e+06	744813	137979	561854	1.19307e+06	1.61762e+06	724301	769772	882094		2.58716e+06	2.20371e+06	57.81	828938	757293	52.54	3.12	1.64	0.00699301	2.16	0.1064	1.55672	166.994	588	9.8	Up
M167T82_2	2.3982e+06	2.12507e+06	2.85523e+06	418530	2.55189e+06	1.85359e+06	1.87865e+06	1.98253e+06	1.86113e+06	4.515e+06	3.67329e+06	2.96148e+06	3.04306e+06	4.09705e+06	4.29388e+06	5.28936e+06		2.00796e+06	2.0538e+06	36.44	3.71678e+06	3.88517e+06	28.87	0.54	-0.89	0.004662	2.33	0.0886941	1.82434	166.861	82.5	1.4	Down
M168T111	170171	152243	51409.3	138659	109096	266609	178174	77015	163038	157638	176870	354554	176417	256715	246953	249424		142922	145451	46.75	222701	211912	30.3	0.64	-0.64	0.0498834	1.3	0.285686	1.46422	168.053	111.1	1.9	Down
M168T121	1.44011e+06	668571	2.18447e+06	4.43676e+06	2.44678e+06	3.25929e+06	4.45075e+06	6.19185e+06	1.36269e+06	2.9338e+06	981491	208275	898153	1.17727e+06	1.75561e+06	598379		3.13482e+06	2.85304e+06	57.97	1.23946e+06	1.07938e+06	66.9	2.53	1.34	0.0206682	1.68	0.184282	1.54878	167.979	121.4	2	Up
M168T82	4.26816e+06	2.22799e+06	1.61195e+06	4.02787e+06	2.21873e+06	1.93517e+06	2.96384e+06	2.08715e+06	1.47727e+06	1.29099e+06	1.72469e+06	1.52177e+06	1.5017e+06	2.38556e+06	1.29893e+06	3.39466e+06		2.66761e+06	2.22336e+06	37.17	1.82445e+06	1.51173e+06	39.67	1.46	0.55	0.0379176	1.42	0.250052	1.43915	168.028	82.1	1.4	Up
M169T101_1	254696	319394	185081	176464	264211	259156	234073	228575	260762	382198	302806	215000	298879	294778	419691	383807		240206	244385	19.07	319740	300843	21.73	0.75	-0.41	0.0281274	1.55	0.216677	1.7779	169.062	100.9	1.7	Down
M169T121	835909	672595	926670	207299	738322	972782	752120	923789	1.30917e+06	3.17163e+06	1.19987e+06	806714	921241	791445	1.92145e+06	999084		753686	794014	32.46	1.39008e+06	1.09948e+06	58.13	0.54	-0.88	0.0281274	1.55	0.216677	1.66424	169.013	121.2	2	Down
M169T473	37129.6	20782	41336	27338.1	27746.9	36370.4	33948.5	30834.9	87556.2	88677.9	136394	55596.2	47789	19776.8	59650.2	64584.1		31935.8	32391.7	20.61	70003	62117.1	49.56	0.46	-1.13	0.0104118	1.98	0.130233	1.95701	169.106	473.3	7.9	Down
M169T77	1.92653e+06	1.00259e+06	1.98001e+06	1.10612e+06	1.7613e+06	1.07779e+06	870911	1.0026e+06	2.15922e+06	2.12138e+06	2.90988e+06	2.64144e+06	1.991e+06	1.1022e+06	1.71968e+06	2.42862e+06		1.34098e+06	1.09195e+06	34.55	2.13418e+06	2.1403e+06	26.29	0.63	-0.67	0.00699301	2.16	0.1064	1.89816	169.014	76.5	1.3	Down
M169T83	1.22995e+06	869707	1.00344e+06	1.41102e+06	2.57584e+06	1.07404e+06	2.30169e+06	3.29255e+06	629355	2.79834e+06	892856	717952	63141.3	62049.6	56837.2	1.31285e+06		1.71978e+06	1.32049e+06	51.7	816673	673653	112.78	2.11	1.07	0.0379176	1.42	0.250052	1.51226	168.858	82.5	1.4	Up
M170T159	4.56131e+06	2.06494e+06	614186	355759	1.52134e+06	1.37139e+06	4.68519e+06	374495	6.33405e+06	1.68224e+06	6.14005e+06	5.29922e+06	7.33427e+06	4.64126e+06	5.07067e+06	2.56506e+06		1.94358e+06	1.44636e+06	90.46	4.88335e+06	5.18494e+06	39.14	0.4	-1.33	0.004662	2.33	0.0886941	1.84706	169.992	158.9	2.6	Down
M171T112	2.12433e+06	1.8099e+06	2.00405e+06	1.697e+06	1.61077e+06	1.53367e+06	1.52246e+06	1.8759e+06	1.82471e+06	2.39523e+06	2.10455e+06	2.38497e+06	2.0622e+06	2.37244e+06	2.13104e+06	2.15855e+06		1.77226e+06	1.75345e+06	12.45	2.17921e+06	2.14479e+06	9.08	0.81	-0.3	0.0029526	2.53	0.0725285	2.05779	171.078	112.4	1.9	Down
M171T125	702061	573671	725544	749125	512715	459112	266109	237594	612017	313544	727584	1.22248e+06	620276	1.09147e+06	1.11171e+06	1.03113e+06		528241	543193	37.74	841277	879358	37.85	0.63	-0.67	0.0498834	1.3	0.285686	1.31562	171.008	125.4	2.1	Down
M171T159	114435	131109	101742	86431.6	111354	84681.8	74275.3	81280.4	309531	101273	227564	295290	310585	174682	32801.7	169210		98163.7	94086.9	20.05	202617	201123	50.5	0.48	-1.05	0.0379176	1.42	0.250052	1.25765	170.995	159.3	2.7	Down
M171T383_1	684029	1.63153e+06	1.111e+06	1.12708e+06	7.0919e+06	1.42834e+06	1.01238e+06	1.40204e+06	1.11047e+07	1.30003e+07	1.09042e+07	1.09852e+07	3.39033e+06	1.20725e+06	4.7456e+06	7.65991e+06		1.93604e+06	1.26456e+06	108.65	7.87468e+06	9.28204e+06	54.72	0.25	-2.02	0.004662	2.33	0.0886941	2.08311	170.833	383.2	6.4	Down
M171T532	122673	72007.1	117101	105235	164526	73687.7	189671	115765	203500	160428	229825	132947	95692.9	326007	288381	206010		120083	116433	33.81	205349	204755	37.42	0.58	-0.77	0.0206682	1.68	0.184282	1.76047	171.114	532.4	8.9	Down
M171T78	2.96681e+07	8.96275e+06	9.31002e+06	9.44535e+06	1.03259e+07	6.89804e+06	2.38676e+07	8.7092e+06	3.48066e+07	9.28628e+06	5.84762e+07	1.0275e+08	2.96542e+07	4.34308e+07	4.47134e+07	2.71673e+07		1.33984e+07	9.37769e+06	63.08	4.37856e+07	3.91187e+07	63.67	0.31	-1.71	0.00699301	2.16	0.1064	1.96602	171.006	77.7	1.3	Down
M171T92_1	738466	688426	811258	388418	1.0015e+06	678723	614023	510383	571087	373126	505781	484987	558646	466534	459657	239492		678899	683574	27.4	457414	475761	23.51	1.48	0.57	0.0104118	1.98	0.130233	1.6387	171.015	91.6	1.5	Up
M171T92_2	979501	1.08302e+06	1.07513e+06	166789	707576	1.04143e+06	193144	702174	2.73016e+06	1.74635e+06	2.1692e+06	2.4008e+06	1.28778e+06	2.13497e+06	1.25218e+06	448033		743596	843538	51.04	1.77118e+06	1.94066e+06	41.93	0.42	-1.25	0.004662	2.33	0.0886941	1.69253	171.028	91.7	1.5	Down
M172T113_2	93909.7	76599.8	98533.4	78349.3	106851	84147.5	84222.7	100199	195465	161302	289953	177148	188267	81404.1	158708	183946		90351.6	89066.2	12.25	179524	180547	31.89	0.5	-0.99	0.004662	2.33	0.0886941	2.33279	172.073	113.3	1.9	Down
M172T484	1.21445e+06	1.38496e+06	1.51326e+06	1.00938e+06	1.16179e+06	1.50896e+06	1.43229e+06	1.11347e+06	824460	1.09171e+06	1.04029e+06	932809	204961	916029	1.05685e+06	1.12449e+06		1.29232e+06	1.29971e+06	14.89	898950	986547	33.15	1.44	0.52	0.0029526	2.53	0.0725285	1.3859	172.106	484.4	8.1	Up
M172T78	2.31189e+06	1.38196e+06	1.39845e+06	1.3911e+06	1.90298e+06	1.24208e+06	2.51238e+06	1.44335e+06	1.33862e+06	1.36737e+06	1.3384e+06	1.3309e+06	881390	337694	1.41662e+06	1.1412e+06		1.69802e+06	1.4209e+06	28.49	1.14402e+06	1.33465e+06	32.27	1.48	0.57	0.0104118	1.98	0.130233	1.32586	172.01	77.6	1.3	Up
M173T227	4.83311e+06	6.27517e+06	3.76803e+06	5.5963e+06	3.55381e+06	5.16001e+06	4.57605e+06	1.03178e+07	1.18066e+06	1.02912e+06	2.3739e+06	1.43567e+06	2.6441e+06	4.49919e+06	6.21683e+06	3.93302e+06		5.51003e+06	4.99656e+06	38.82	2.91406e+06	2.509e+06	62.97	1.89	0.92	0.0206682	1.68	0.184282	1.77363	172.831	227.3	3.8	Up
M173T420	52123.7	59499.7	8025.04	105525	72634.7	16030.3	39870.3	5905.09	2600.58	24837.3	5038.55	3396.78	6660.3	5954.09	9553.54	2043.46		44951.7	45997	77.29	7510.58	5496.32	98.69	5.99	2.58	0.00699301	2.16	0.1064	1.93766	173.072	419.9	7	Up
M174T104	343462	78882.3	49414.9	18741.8	63516.4	53042.5	140371	22537.3	2.27975e+06	228616	1.9771e+06	4.2213e+06	1.70484e+06	230148	301759	143402		96246.1	58279.4	111.03	1.38586e+06	1.0033e+06	104.51	0.07	-3.85	0.0018648	2.73	0.0601903	2.13078	174.041	104.2	1.7	Down
M174T453	128759	111691	126349	44280.8	44321.1	144671	44239.8	82832.7	31340.3	48815.7	40843.6	70104.3	47335.4	41503.5	47369.3	22437.6		90893.1	97262	46.67	43718.7	44419.4	31.97	2.08	1.06	0.0379176	1.42	0.250052	1.79508	174.122	453.4	7.6	Up
M174T85_1	369283	207769	425653	268254	258989	342137	263473	244609	1.41539e+06	340551	2.20464e+06	2.37916e+06	1.42589e+06	359496	346953	464606		297521	265864	24.74	1.11709e+06	940001	76.83	0.27	-1.91	0.00699301	2.16	0.1064	1.83637	173.989	84.7	1.4	Down
M175T126_1	1.01259e+07	1.19288e+07	1.12503e+07	1.28201e+07	7.6649e+06	1.21688e+07	7.32141e+06	1.0305e+07	1.2277e+07	2.15312e+07	2.10859e+07	1.08233e+07	1.37396e+07	1.37006e+07	9.62327e+06	1.33693e+07		1.04481e+07	1.07776e+07	19.5	1.45188e+07	1.35349e+07	30.53	0.72	-0.47	0.0281274	1.55	0.216677	1.58248	174.956	126.1	2.1	Down
M175T190	168663	80143.8	193564	154128	173056	71266.9	208954	121483	247840	216862	303450	286873	120361	312566	291120	114837		146407	161396	34.69	236739	267357	33.71	0.62	-0.69	0.0379176	1.42	0.250052	1.53857	175.098	190	3.2	Down
M175T295	1.05457e+06	684219	1.44186e+06	705594	631197	718445	898817	1.24549e+06	2.15448e+06	1.48239e+06	2.9394e+06	2.67673e+06	1.39733e+06	1.00167e+06	1.51076e+06	1.37939e+06		922524	808631	32.32	1.81777e+06	1.49657e+06	38.06	0.51	-0.98	0.0029526	2.53	0.0725285	2.07088	175.098	294.9	4.9	Down
M175T362	96468.7	141891	147997	143050	65947.3	155086	121236	95067.6	168126	100614	146387	208629	169056	181782	145375	158338		120843	131563	26.39	159788	163232	19.67	0.76	-0.4	0.014763	1.83	0.158002	1.31519	175.061	362.3	6	Down
M175T433	120509	95657.5	116207	77212.9	137511	126117	79642.2	136680	198313	639262	303380	217841	314614	95419.3	210023	85994.2		111192	118358	21.68	258106	213932	67.76	0.43	-1.21	0.0379176	1.42	0.250052	1.77808	175.098	433	7.2	Down
M175T85	3.83782e+06	3.63294e+06	4.36484e+06	1.88202e+06	3.70459e+06	2.60651e+06	2.53576e+06	2.44118e+06	2.36163e+06	1.06266e+06	1.82004e+06	2.41169e+06	1.89023e+06	2.10394e+06	2.55382e+06	836015		3.12571e+06	3.11973e+06	27.75	1.88e+06	1.99709e+06	33.52	1.66	0.73	0.00699301	2.16	0.1064	1.78858	174.984	84.8	1.4	Up
M176T128	251612	58640.7	250277	56752.7	206284	75135.7	187635	187823	413081	322451	455651	493000	393172	291214	224521	275925		159270	187729	52.18	358627	357812	26.31	0.44	-1.17	0.000621601	3.21	0.0444681	2.09272	175.942	128.2	2.1	Down
M177T765	9.24921e+06	5.97326e+06	1.1788e+07	7.06779e+06	6.22217e+06	6.81103e+06	5.48106e+06	7.70343e+06	3.1567e+06	3.23824e+06	2.92182e+06	5.69004e+06	4.41706e+06	8.56796e+06	7.37422e+06	1.97058e+06		7.537e+06	6.93941e+06	27.55	4.66708e+06	3.82765e+06	50.12	1.61	0.69	0.0379176	1.42	0.250052	1.76426	177.092	765.2	12.8	Up
M177T79	1.1657e+09	1.14802e+09	1.29491e+09	7.30369e+08	1.27477e+09	1.58382e+09	1.05964e+09	1.30417e+09	1.01424e+09	9.37473e+08	1.10899e+09	1.14206e+09	1.25577e+09	7.22482e+08	9.49659e+08	1.01415e+09		1.19517e+09	1.22024e+09	20.41	1.0181e+09	1.01419e+09	15.69	1.17	0.23	0.0379176	1.42	0.250052	1.0211	176.935	78.7	1.3	Up
M178T659	179159	82234.4	187376	51121.4	106491	83847.7	35720.9	93854.4	247090	161239	161460	361396	240985	70993	201596	195338		102476	88851	53.49	205012	198467	40.98	0.5	-1	0.0206682	1.68	0.184282	1.78329	178.1	659.3	11	Down
M178T79	2.11083e+06	1.36253e+06	3.07759e+06	1.76678e+06	1.13867e+06	1.65382e+06	1.38488e+06	1.87879e+06	3.18904e+06	1.55057e+06	4.8598e+06	3.43848e+06	2.45797e+06	2.47461e+06	2.13406e+06	2.74424e+06		1.79674e+06	1.7103e+06	33.65	2.85609e+06	2.60942e+06	35.03	0.63	-0.67	0.014763	1.83	0.158002	1.69804	177.94	78.6	1.3	Down
M179T108	3.6969e+06	6.7691e+06	7.24467e+06	9.21637e+06	7.58566e+06	6.41827e+06	6.56023e+06	7.10499e+06	5.79751e+06	4.02988e+06	5.76411e+06	6.31882e+06	5.58329e+06	6.58793e+06	3.06323e+06	4.17178e+06		6.82452e+06	6.93704e+06	22.55	5.16457e+06	5.6737e+06	24.25	1.32	0.4	0.014763	1.83	0.158002	1.57589	179.021	108.3	1.8	Up
M179T332	570870	555765	655870	633397	183080	615907	418426	521887	394080	179778	392089	543528	382599	460172	202870	451423		519400	563318	29.85	375817	393084	33.35	1.38	0.47	0.0281274	1.55	0.216677	1.23965	179.072	332.3	5.5	Up
M179T761	3.42568e+06	4.41702e+06	5.23906e+06	3.18672e+06	2.89792e+06	5.86068e+06	2.64445e+06	3.848e+06	9.61421e+06	3.0465e+06	6.52388e+06	1.1632e+07	1.29875e+07	5.87345e+06	3.45278e+06	1.02312e+07		3.93994e+06	3.63684e+06	29.11	7.92019e+06	8.06905e+06	47.13	0.5	-1.01	0.0206682	1.68	0.184282	1.61229	178.978	760.7	12.7	Down
M179T765	368152	240515	1.94552e+06	3.70759e+06	1.63313e+06	2.51252e+06	4.32988e+06	3.52666e+06	308954	1.60333e+06	157613	5458.33	84021.8	412854	430973	99693.4		2.283e+06	2.22902e+06	66.62	387862	233284	132.93	5.89	2.56	0.00699301	2.16	0.1064	1.77633	179.108	764.9	12.7	Up
M179T90	4.2299e+07	5.42497e+07	2.75391e+07	5.32524e+07	6.83619e+07	3.89419e+07	5.11755e+07	3.93507e+07	5.40362e+07	5.85361e+07	7.05583e+07	7.57188e+07	4.47441e+07	8.67928e+07	6.48361e+07	4.73227e+07		4.68963e+07	4.67372e+07	26.6	6.28181e+07	6.16861e+07	23.05	0.75	-0.42	0.0379176	1.42	0.250052	1.4378	179.056	90.2	1.5	Down
M180T108	5.99539e+06	6.8085e+06	5.55607e+06	6.24276e+06	3.92182e+06	6.50313e+06	6.68592e+06	6.86244e+06	8.24354e+06	2.69218e+06	5.132e+06	5.69254e+06	4.83705e+06	4.17369e+06	3.52959e+06	3.62425e+06		6.072e+06	6.37294e+06	16.06	4.74061e+06	4.50537e+06	36.16	1.28	0.36	0.0498834	1.3	0.285686	1.49504	180.014	108.3	1.8	Up
M180T122_1	4.74217e+06	1.18337e+07	7.16911e+06	7.54097e+06	6.76374e+06	1.03096e+07	9.90223e+06	8.02468e+06	4.13998e+06	1.06912e+07	3.24171e+06	3.28182e+06	3.99947e+06	4.48367e+06	5.27392e+06	5.829e+06		8.28577e+06	7.78282e+06	27.38	5.11759e+06	4.31183e+06	47.34	1.62	0.7	0.014763	1.83	0.158002	1.78486	180.034	121.6	2	Up
M180T309	843028	1.06744e+06	913895	1.092e+06	1.16897e+06	1.17286e+06	1.4285e+06	1.16753e+06	217693	1.02687e+06	347526	220896	271829	596286	743768	569266		1.10678e+06	1.12977e+06	16.16	499266	458396	57.85	2.22	1.15	0.000621601	3.21	0.0444681	2.09092	180.034	309.5	5.2	Up
M180T91	4.05016e+06	4.04849e+06	4.55517e+06	2.61727e+06	5.33115e+06	3.50242e+06	3.44107e+06	3.47009e+06	3.46554e+06	1.98473e+06	2.98326e+06	2.99319e+06	3.01124e+06	2.69591e+06	2.94469e+06	1.6705e+06		3.87698e+06	3.77546e+06	21.17	2.71863e+06	2.96398e+06	21.88	1.43	0.51	0.00699301	2.16	0.1064	1.79722	180.059	90.5	1.5	Up
M180T99	1.12061e+08	1.2245e+08	1.23511e+08	6.51097e+07	1.58021e+08	1.06089e+08	9.73381e+07	9.54927e+07	9.7511e+07	5.95375e+07	8.02939e+07	8.64732e+07	8.74235e+07	7.56525e+07	8.0934e+07	3.95087e+07		1.10009e+08	1.09075e+08	24.41	7.59168e+07	8.06139e+07	24.13	1.45	0.54	0.0104118	1.98	0.130233	1.6685	180.034	98.9	1.6	Up
M181T40	297358	376912	403279	467284	429958	427704	367178	473042	261912	339695	316347	253356	413574	336131	300238	395198		405339	415492	14.28	327056	326239	17.48	1.24	0.31	0.0281274	1.55	0.216677	1.66558	180.935	39.7	0.7	Up
M181T51	2.30236e+06	2.29416e+06	1.87759e+06	1.64793e+06	1.78707e+06	1.3506e+06	1.93832e+06	1.93936e+06	318393	2.21597e+06	466992	378036	309734	1.21467e+06	1.12465e+06	1.0267e+06		1.89217e+06	1.90796e+06	16.69	881894	746848	74.74	2.15	1.1	0.004662	2.33	0.0886941	1.91417	180.9	51.2	0.9	Up
M181T709	5.20436e+06	6.66943e+06	3.55566e+06	5.45744e+06	3.2189e+06	6.30621e+06	4.19765e+06	4.25963e+06	2.0686e+06	2.26379e+06	1.89515e+06	3.70925e+06	4.05131e+06	3.21914e+06	3.10618e+06	5.6866e+06		4.85866e+06	4.732e+06	25.84	3.25e+06	3.16266e+06	38.6	1.49	0.58	0.0281274	1.55	0.216677	1.73661	180.989	708.6	11.8	Up
M182T121	3.81185e+06	5.29657e+06	5.84327e+06	5.43704e+06	2.93747e+06	6.5967e+06	3.43753e+06	3.37904e+06	2.74971e+07	2.58257e+06	3.05231e+07	2.17546e+07	2.24437e+07	5.85553e+06	6.10451e+06	1.14151e+07		4.59243e+06	4.55421e+06	29.61	1.6022e+07	1.65848e+07	67.54	0.29	-1.8	0.0206682	1.68	0.184282	1.70676	181.995	121.3	2	Down
M182T122_2	2.40243e+06	5.47331e+06	2.9197e+06	4.5414e+06	4.29767e+06	4.99361e+06	2.77553e+06	4.28346e+06	1.20634e+06	2.19079e+06	134587	202910	62133.5	1.88106e+06	1.74823e+06	3.09298e+06		3.96089e+06	4.29057e+06	28.35	1.31488e+06	1.47729e+06	84.53	3.01	1.59	0.0010878	2.96	0.0513787	1.81979	182.046	121.6	2	Up
M182T374	669978	665655	710868	727314	618670	651585	707047	718412	543072	674648	650825	702323	545901	649514	626293	518360		683691	688512	5.57	613867	637904	11.2	1.11	0.16	0.0281274	1.55	0.216677	1.64283	182.01	374.2	6.2	Up
M182T546	850329	1.00833e+06	752602	907840	1.08033e+06	1.20022e+06	1.10116e+06	499270	738058	612849	368275	468927	738019	686776	840148	687814		925010	958086	24.33	642608	687295	24.07	1.44	0.53	0.00699301	2.16	0.1064	1.61752	181.993	545.6	9.1	Up
M182T81	8.75878e+06	7.37878e+06	6.40838e+06	4.91656e+06	1.12013e+07	7.09856e+06	8.93714e+06	9.56994e+06	1.37967e+07	1.35119e+07	2.60741e+07	2.40068e+07	1.8439e+07	1.17114e+07	1.05261e+07	1.08745e+07		8.03367e+06	8.06878e+06	24.63	1.61176e+07	1.36543e+07	37.6	0.5	-1	0.000621601	3.21	0.0444681	2.14778	182.013	80.6	1.3	Down
M182T90	1.01609e+06	679595	821714	1.10328e+06	917403	693858	836275	796139	533735	498844	680474	800760	613916	762698	783569	475023		858045	828994	17.23	643627	647195	20.52	1.33	0.41	0.0104118	1.98	0.130233	1.84847	182.075	89.6	1.5	Up
M182T99_2	4.46145e+06	1.5973e+06	907282	1.07035e+06	579349	2.45187e+06	939487	856467	5.74104e+06	5.70833e+06	7.95542e+06	965617	3.17252e+06	788992	9.48153e+06	4.53052e+06		1.60794e+06	1.00492e+06	80.42	4.793e+06	5.11943e+06	64.59	0.34	-1.58	0.0379176	1.42	0.250052	1.74221	182.049	98.9	1.6	Down
M183T31	139539	190064	91940.6	114607	69598.1	58015.3	85688.2	56363.2	124398	240449	192638	180069	116630	127767	179096	141740		100727	88814.4	45.56	162848	160418	26.22	0.62	-0.69	0.014763	1.83	0.158002	1.83795	182.879	30.6	0.5	Down
M183T735	1.5214e+09	1.37817e+09	2.19764e+09	9.86384e+08	1.81738e+09	2.40644e+09	1.82742e+09	2.89555e+09	7.76533e+08	1.56784e+09	1.03644e+09	2.04857e+09	7.07342e+08	5.62501e+08	6.40435e+08	8.71428e+08		1.8788e+09	1.8224e+09	32.41	1.02639e+09	8.23981e+08	50.63	1.83	0.87	0.014763	1.83	0.158002	1.87369	182.988	735.2	12.3	Up
M183T75_1	9.206e+06	1.04648e+07	1.05418e+07	1.02869e+07	1.11299e+07	9.16283e+06	1.14259e+07	1.01693e+07	3.23695e+07	1.05004e+07	4.72559e+07	4.42873e+07	4.59403e+07	1.83439e+07	8.52362e+06	1.11422e+07		1.02984e+07	1.03758e+07	7.83	2.72954e+07	2.53567e+07	62.48	0.38	-1.41	0.0379176	1.42	0.250052	1.6797	182.51	75.4	1.3	Down
M183T99	6.31105e+06	7.34308e+06	5.92031e+06	4.61577e+06	6.23143e+06	7.05899e+06	7.78104e+06	7.66735e+06	5.28185e+06	5.46043e+06	5.56508e+06	3.35919e+06	4.43161e+06	5.29719e+06	5.0306e+06	7.32182e+06		6.61613e+06	6.68502e+06	16.07	5.21847e+06	5.28952e+06	21.39	1.27	0.34	0.0206682	1.68	0.184282	1.45781	183.006	98.8	1.6	Up
M184T122_2	2.06702e+06	2.43417e+06	2.17001e+06	2.09285e+06	2.96999e+06	3.7164e+06	2.17997e+06	3.49296e+06	5.97395e+06	5.84496e+06	8.23049e+06	2.60434e+06	4.78819e+06	2.71442e+06	7.84451e+06	3.6596e+06		2.64042e+06	2.30707e+06	25.19	5.20756e+06	5.31658e+06	41.47	0.51	-0.98	0.00699301	2.16	0.1064	2.02635	184.061	122.2	2	Down
M184T69	1.27499e+06	1.12064e+06	772275	864595	1.2305e+06	1.08764e+06	1.2968e+06	1.29147e+06	1.75484e+06	1.34498e+06	1.83863e+06	1.6932e+06	1.46145e+06	915232	1.21034e+06	1.60029e+06		1.11736e+06	1.17557e+06	18.03	1.47737e+06	1.53087e+06	21.01	0.76	-0.4	0.0206682	1.68	0.184282	1.64441	183.996	69.2	1.2	Down
M185T99	1.3719e+06	977439	1.17733e+06	1.0777e+06	1.32815e+06	1.17299e+06	1.08472e+06	1.25419e+06	1.33361e+06	1.4227e+06	1.22826e+06	1.29704e+06	1.37882e+06	1.43898e+06	1.42689e+06	1.44494e+06		1.18055e+06	1.17516e+06	11.32	1.3714e+06	1.40076e+06	5.73	0.86	-0.22	0.004662	2.33	0.0886941	2.00024	185.003	98.7	1.6	Down
M186T105	151709	175444	193756	240453	174465	202450	156897	193856	155015	136594	135351	135139	176411	131269	178160	174372		186129	184600	15.23	152789	145804	13.58	1.22	0.28	0.0281274	1.55	0.216677	1.72264	185.845	105	1.8	Up
M186T118	691370	791551	724898	923626	703645	947581	935624	841721	1.09494e+06	971906	1.24592e+06	1.12808e+06	990673	1.1232e+06	1.24165e+06	1.57125e+06		820002	816636	13.1	1.17095e+06	1.12564e+06	16.23	0.7	-0.51	0.0001554	3.81	0.0365579	2.22177	186.077	117.9	2	Down
M186T128	52880.1	48510.5	62691.6	76587.9	63933.7	65855.1	48381.2	49717.4	10440.7	38389.5	40100	42905.2	28683.8	47569.8	14938.6	9034.44		58569.7	57785.9	17.55	29007.7	33536.6	53.57	2.02	1.01	0.0001554	3.81	0.0365579	2.00722	185.947	127.9	2.1	Up
M186T361	3.45439e+06	1.74343e+06	1.12563e+06	1.85264e+06	1.00255e+06	4.2838e+06	2.14285e+06	5.04178e+06	1.20067e+07	3.59932e+06	2.67175e+07	1.12628e+07	1.09826e+07	8.18361e+06	1.34791e+07	1.53505e+06		2.58088e+06	1.99775e+06	58.12	1.09708e+07	1.11227e+07	69.47	0.24	-2.09	0.0104118	1.98	0.130233	1.90198	186.114	360.9	6	Down
M186T374_2	443579	912754	841778	462591	1.17652e+06	858354	960344	814248	1.95829e+06	1.52124e+06	1.95473e+06	1.06645e+06	1.23477e+06	955122	1.12657e+06	1.64862e+06		808771	850066	30.5	1.43322e+06	1.378e+06	27.64	0.56	-0.83	0.0018648	2.73	0.0601903	2.0602	186.113	374.4	6.2	Down
M186T547	115981	393857	338141	221144	249637	179291	152489	119689	62829.4	290189	430844	362879	400211	399851	407050	386523		221278	200217	45.88	342547	393187	35.22	0.65	-0.63	0.0379176	1.42	0.250052	1.0098	186.121	547.3	9.1	Down
M187T118	1.85517e+06	3.96363e+06	1.84496e+06	1.40094e+06	2.71771e+06	2.9077e+06	3.42948e+06	3.05435e+06	1.3835e+06	2.5743e+06	2.0343e+06	2.32932e+06	1.40353e+06	184691	808030	614914		2.64674e+06	2.81271e+06	33.21	1.41657e+06	1.39352e+06	60.18	1.87	0.9	0.0206682	1.68	0.184282	1.52207	187.109	117.6	2	Up
M187T35	62576.8	77049.2	72631	56100.4	70621.9	74009.8	78075.5	82162.7	87529.2	85606.3	89327.3	85006.7	81784.5	65170.3	63334.7	88122.7		71653.4	73320.4	11.94	80735.2	85306.5	12.93	0.89	-0.17	0.0498834	1.3	0.285686	1.23971	186.866	34.8	0.6	Down
M187T361	596709	679749	599019	257543	382441	640284	384157	746846	847095	1.24782e+06	755690	844675	740127	1.2016e+06	1.75316e+06	435338		535844	597864	32.16	978187	845885	41.6	0.55	-0.87	0.004662	2.33	0.0886941	1.76566	187.117	360.7	6	Down
M187T406	5983.31	46209.1	8770.27	5383.91	2321.73	48779.2	66771.5	13563.3	79620.4	32947.5	98361.3	81617.4	79161.9	47689.7	8364.35	36915.4		24722.8	11166.8	101.58	58084.7	63425.8	53.44	0.43	-1.23	0.0498834	1.3	0.285686	1.41898	187.007	406	6.8	Down
M187T92	86388.5	281558	70198.8	85882.2	238533	416148	311874	277080	1.45587e+06	412098	1.50693e+06	821127	1.22042e+06	326986	339535	349558		220958	257807	57.39	804066	616613	64.73	0.27	-1.86	0.0018648	2.73	0.0601903	1.94538	187.001	91.5	1.5	Down
M187T94	2.60904e+06	4.13881e+06	2.59787e+06	3.47823e+06	3.15255e+06	3.96651e+06	3.3e+06	3.92486e+06	2.5748e+06	2.39191e+06	3.48195e+06	2.41225e+06	3.04826e+06	2.33872e+06	2.53918e+06	3.88444e+06		3.39598e+06	3.38912e+06	17.56	2.83394e+06	2.55699e+06	20.41	1.2	0.26	0.0379176	1.42	0.250052	1.34671	187.072	93.9	1.6	Up
M187T96	719448	622383	697347	806205	794506	751457	904116	700012	588963	738423	740581	744835	525317	592770	671895	543811		749434	735452	11.43	643324	632332	14.27	1.16	0.22	0.0498834	1.3	0.285686	1.53146	187.12	96.3	1.6	Up
M188T157	1.93778e+06	1.70622e+06	2.41894e+06	1.40224e+06	1.80707e+06	1.93032e+06	1.70957e+06	1.80783e+06	2.93747e+06	2.99969e+06	2.80715e+06	1.93789e+06	2.69513e+06	2.38614e+06	2.43765e+06	2.04493e+06		1.84e+06	1.80745e+06	15.66	2.53075e+06	2.56639e+06	15.71	0.73	-0.46	0.0010878	2.96	0.0513787	2.18663	187.942	156.6	2.6	Down
M188T301	3.01227e+06	2.23832e+06	2.17783e+06	2.35507e+06	3.48547e+06	2.54729e+06	2.17119e+06	3.80926e+06	2.75991e+06	5.31415e+06	5.20154e+06	2.5552e+06	3.90579e+06	3.51611e+06	5.01683e+06	3.44092e+06		2.72459e+06	2.45118e+06	23.41	3.96381e+06	3.71095e+06	27.6	0.69	-0.54	0.014763	1.83	0.158002	1.8461	188.093	300.6	5	Down
M188T417	941659	1.112e+06	360614	834503	670946	1.43277e+06	851879	355772	2.1638e+06	903479	2.46365e+06	1.71711e+06	2.08771e+06	1.10623e+06	1.32208e+06	1.08698e+06		820018	843191	44.34	1.60638e+06	1.5196e+06	36.33	0.51	-0.97	0.0104118	1.98	0.130233	1.81529	188.039	417.4	7	Down
M188T658	8.7638e+06	4.66553e+06	7.73677e+06	4.13435e+06	4.38051e+06	6.23327e+06	2.45111e+06	3.93355e+06	7.59887e+06	1.03557e+07	1.6869e+07	1.16193e+07	6.55475e+06	6.34634e+06	1.28437e+07	1.44811e+07		5.28736e+06	4.52302e+06	40.05	1.08336e+07	1.09875e+07	35.5	0.49	-1.03	0.004662	2.33	0.0886941	2.1042	187.861	657.8	11	Down
M188T96	1.66946e+06	2.57287e+06	2.15083e+06	3.29398e+06	1.89846e+06	1.56115e+06	2.56576e+06	3.14986e+06	4.65222e+06	3.58956e+06	4.9904e+06	3.7529e+06	4.21762e+06	3.83086e+06	4.80069e+06	3.43049e+06		2.3578e+06	2.3583e+06	27.56	4.15809e+06	4.02424e+06	14.31	0.57	-0.82	0.0001554	3.81	0.0365579	2.28041	188.057	96.3	1.6	Down
M189T359	5.78031e+06	1.12276e+07	5.5715e+06	4.33916e+06	1.25387e+07	1.34367e+07	1.23913e+07	1.26989e+07	4.64826e+06	1.05444e+07	4.4369e+06	5.76855e+06	6.92237e+06	547453	3.90388e+06	3.80654e+06		9.74801e+06	1.18094e+07	39.11	5.07229e+06	4.54258e+06	56.69	1.92	0.94	0.0206682	1.68	0.184282	1.41355	188.986	359.4	6	Up
M189T83	275360	284637	325566	315009	301683	332219	401644	385977	195772	530087	205598	250994	194834	275386	248887	223776		327762	320287	13.8	265667	236332	41.67	1.23	0.3	0.014763	1.83	0.158002	1.35455	189.005	83.5	1.4	Up
M189T95_1	1.28834e+08	1.09559e+08	9.85405e+07	1.04546e+08	7.46606e+07	1.01742e+08	1.05274e+08	1.03614e+08	8.47912e+07	7.68062e+07	5.61056e+07	6.62025e+07	6.62783e+07	7.00854e+07	8.83982e+07	7.30404e+07		1.03346e+08	1.0408e+08	14.36	7.27135e+07	7.15629e+07	14.47	1.42	0.51	0.0010878	2.96	0.0513787	2.19892	189.04	94.7	1.6	Up
M190T106	8.45333e+06	4.00771e+06	6.03446e+06	9.43567e+06	8.42426e+06	5.51688e+06	6.64076e+06	7.15794e+06	4.44967e+06	2.74781e+06	6.10668e+06	4.4004e+06	1.16822e+06	7.11716e+06	1.64858e+06	3.43169e+06		6.95888e+06	6899351	25.65	3.88377e+06	3.91604e+06	53.17	1.79	0.84	0.014763	1.83	0.158002	1.77747	190.018	106.1	1.8	Up
M190T148	77295.4	46483.9	100154	46622.7	263625	112620	37542.8	24802	2.1952e+06	18266.7	2.17838e+06	2.15724e+06	1.83721e+06	153113	119925	829549		88643.2	61959	87.06	1.18611e+06	1.33338e+06	84.7	0.07	-3.74	0.0206682	1.68	0.184282	1.72406	190.018	148	2.5	Down
M190T478	4854.25	3417.27	7780.02	538.695	3173.15	3862.26	818.549	3932.59	14184.6	7032.74	14936.5	22413	17134	925.372	3265.11	10097.5		3547.1	3639.77	64.4	11248.6	12141	64.71	0.32	-1.67	0.0379176	1.42	0.250052	1.50858	190.036	478.1	8	Down
M190T658	8.47371e+06	1.78029e+07	1.65918e+07	1.606e+07	1.45796e+07	1.13006e+07	1.49614e+07	1.34984e+07	7.26309e+06	1.06552e+07	8.99043e+06	2.20826e+06	1.9374e+06	1.02699e+07	7.36586e+06	1.35947e+07		1.41586e+07	1.47705e+07	21.45	7.78559e+06	8.17814e+06	52.14	1.82	0.86	0.004662	2.33	0.0886941	1.62341	189.858	658	11	Up
M190T78	2.26886e+06	2.46879e+06	1.22552e+06	1.82467e+06	1.03567e+06	2.77944e+06	2.16492e+06	2.16391e+06	1.51193e+06	838247	1.31731e+06	1.80096e+06	1.63796e+06	1.28501e+06	952641	1.18632e+06		1.99147e+06	2.16442e+06	30.09	1.3163e+06	1.30116e+06	24.95	1.51	0.6	0.0281274	1.55	0.216677	1.73449	190.018	77.9	1.3	Up
M190T82_1	9.59348e+06	9.82528e+06	1.09212e+07	9.76947e+06	9.30248e+06	9.21272e+06	9.74173e+06	9.31532e+06	1.79817e+07	1.06014e+07	1.99827e+07	1.46425e+07	9.9817e+06	1.09368e+07	9.80948e+06	1.48217e+07		9.71022e+06	9.66761e+06	5.6	1.35947e+07	1.27896e+07	28.63	0.71	-0.49	0.0018648	2.73	0.0601903	1.79329	189.988	81.9	1.4	Down
M191T204	136845	357873	374763	110954	122850	110432	375958	103596	391454	135261	160419	144315	474616	470873	448789	444332		211659	129847	61.99	333757	417893	47.07	0.63	-0.66	0.0206682	1.68	0.184282	1.16818	191.058	203.6	3.4	Down
M191T255	922782	1.25674e+06	1.33152e+06	1.53006e+06	1.56198e+06	1.46943e+06	1.18455e+06	1.50711e+06	1.09988e+06	1.35557e+06	745064	544524	542091	861611	729686	1.10916e+06		1.34552e+06	1.40047e+06	16.26	873448	803337	33.37	1.54	0.62	0.004662	2.33	0.0886941	1.899	191.058	254.8	4.2	Up
M192T361	5.08906e+06	5.18504e+06	5.32132e+06	1.05645e+06	4.25326e+06	7.94995e+06	5.54134e+06	5.18435e+06	550765	350870	887026	1.41491e+06	3.78482e+06	4.03881e+06	218803	827216		4.9476e+06	5.1847e+06	38.4	1.50915e+06	857121	101.31	3.28	1.71	0.0010878	2.96	0.0513787	2.02846	192.066	361.4	6	Up
M192T373	7.52481e+06	9.92236e+06	8.51919e+06	1.10125e+07	6.67838e+06	7.34657e+06	7.59215e+06	9.57074e+06	1.07618e+07	8.80308e+06	1.13816e+07	9.73856e+06	1.01058e+07	8.78296e+06	9.98478e+06	1.30735e+07		8.52083e+06	8.05567e+06	17.69	1.0329e+07	1.00453e+07	13.72	0.82	-0.28	0.0281274	1.55	0.216677	1.56364	192.067	372.5	6.2	Down
M192T85	1.45698e+08	2.13649e+08	2.77554e+08	2.37323e+08	1.63418e+08	2.08212e+08	1.62818e+08	2.40653e+08	3.56316e+08	2.08063e+08	2.45961e+08	3.91726e+08	3.47013e+08	2.23067e+08	2.09996e+08	3.19125e+08		2.06166e+08	2.10931e+08	22.21	2.87658e+08	2.82543e+08	25.73	0.72	-0.48	0.0498834	1.3	0.285686	1.52464	191.994	85.1	1.4	Down
M193T31	139500	70713.9	124209	74078.3	95733.7	106971	86016	79714.7	128612	190304	168658	162205	120732	94790.2	158182	83142.5		97117.1	90874.9	25.47	138328	143397	27.23	0.7	-0.51	0.0379176	1.42	0.250052	1.7072	192.911	31.1	0.5	Down
M193T580	494156	511139	708410	321989	436061	358967	551196	535161	387010	786286	147489	173443	145228	328912	174272	425201		489635	502647	24.68	320980	251592	68.26	1.53	0.61	0.0498834	1.3	0.285686	1.46696	192.989	580.1	9.7	Up
M195T528	2.25564e+06	3.73912e+06	3.39066e+06	4.3785e+06	4.20646e+06	3.82188e+06	5.97095e+06	7.28043e+06	313874	6.45344e+06	321485	134345	1.53313e+06	4.10233e+06	2.71516e+06	2.54609e+06		4.38045e+06	4.01417e+06	35.77	2.26498e+06	2.03961e+06	97.1	1.93	0.95	0.0498834	1.3	0.285686	1.49512	195.102	527.8	8.8	Up
M195T59	349651	311580	336288	299925	337397	321993	341249	323547	377882	365850	412287	389959	323426	351958	387113	344055		327704	329918	5.05	369066	371866	7.75	0.89	-0.17	0.004662	2.33	0.0886941	2.0316	194.904	58.6	1	Down
M195T74	9.98411e+06	3.44164e+06	3.96501e+06	4.5371e+06	2.67812e+06	2.21212e+06	2.63968e+06	4.8266e+06	7.59543e+06	4.75493e+06	1.26936e+07	1.20903e+07	7.01318e+06	7.06286e+06	1.15398e+07	2.76802e+06		4.28555e+06	3.70333e+06	57.99	8.18977e+06	7.32914e+06	44.01	0.52	-0.93	0.0206682	1.68	0.184282	1.63656	194.928	73.9	1.2	Down
M196T721	1.19715e+07	2.14837e+07	2.22591e+07	1.79864e+07	3.5636e+07	2.92993e+07	1.65717e+07	2.11264e+07	9.58071e+06	1.29524e+07	1.19936e+07	1.00049e+07	1.01207e+07	4.11444e+06	1.64839e+07	1.82115e+07		2.20418e+07	2.1305e+07	33.71	1.16828e+07	1.10571e+07	37.5	1.89	0.92	0.004662	2.33	0.0886941	1.81051	195.811	721.2	12	Up
M196T748	2.61213e+07	1.74835e+07	2.89292e+07	2.25293e+07	1.5321e+07	2.26932e+07	1.33959e+07	1.43907e+07	6.76818e+06	5.29956e+06	1.61788e+07	4.74854e+06	4.05131e+06	3.07938e+07	8.95654e+06	1.37535e+07		2.0108e+07	2.00064e+07	28.76	1.13188e+07	7.86236e+06	79.54	1.78	0.83	0.0379176	1.42	0.250052	1.70992	195.811	748	12.5	Up
M196T760	510658	659232	115891	340610	308204	418049	623072	640981	647458	1.04291e+06	788628	430876	736775	726113	731423	573817		452087	464353	42.51	709750	728768	24.91	0.64	-0.65	0.0104118	1.98	0.130233	1.54901	196.142	760	12.7	Down
M196T94	603483	1.46972e+06	671822	996201	1.03355e+06	1.84e+06	1.78282e+06	1.84531e+06	1.08049e+06	326325	951686	571359	1.0711e+06	478845	568732	794020		1.28036e+06	1.25164e+06	40.59	730320	682690	39.06	1.75	0.81	0.0379176	1.42	0.250052	1.65225	196.048	94.2	1.6	Up
M198T214	493100	531837	558766	403296	308432	318581	627765	478598	375573	376917	199308	221089	309974	341174	258378	312584		465047	485849	24.45	299374	311279	22.47	1.55	0.64	0.0104118	1.98	0.130233	1.90481	198.077	214.1	3.6	Up
M198T374	2.36267e+08	3.81314e+08	1.8177e+08	3.2374e+08	9.20724e+08	5.35474e+08	4.65733e+08	3.74471e+08	2.95681e+08	1.76963e+08	3.29275e+08	1.37363e+08	1.5723e+08	9.78539e+07	1.40047e+08	1.47137e+08		4.27437e+08	3.77893e+08	53.72	1.85194e+08	1.52184e+08	44.35	2.31	1.21	0.0029526	2.53	0.0725285	1.91639	198.033	374.1	6.2	Up
M199T102	2.39518e+06	2.11404e+06	2.47928e+06	1.72451e+06	116516	1.52299e+06	241243	1.18031e+06	5.97222e+06	1.09248e+06	4.35192e+06	3.08456e+06	5.47774e+06	3.08874e+06	1.90489e+06	4.45615e+06		1.47176e+06	1.62375e+06	61.76	3.67859e+06	3.72033e+06	46.05	0.4	-1.32	0.014763	1.83	0.158002	1.56491	199.037	101.7	1.7	Down
M199T119	428403	702632	373524	367139	294585	443192	427897	282551	310813	309993	156365	255153	277078	385798	240261	368066		414991	400710	31.54	287941	293536	25.52	1.44	0.53	0.0281274	1.55	0.216677	1.6403	199.024	119	2	Up
M199T310	85266.9	127860	94178.3	71585.7	67635.8	71736.8	65609.9	82088.5	133625	146141	52988.8	140364	126474	95658.5	101825	168642		83245.3	76912.6	24.61	120715	130050	29.87	0.69	-0.54	0.0281274	1.55	0.216677	1.45685	199.007	310	5.2	Down
M199T517	61745.8	36056	50690.9	49166.7	61264.1	50841.5	47858.5	36332.2	48804	27113.5	44050.5	29996.6	45021.7	36317.4	44091.7	33882.7		49244.5	49928.8	19.54	38659.7	40183.9	20.48	1.27	0.35	0.0206682	1.68	0.184282	1.40819	199.007	517.1	8.6	Up
M199T76	1.60445e+06	1.5222e+06	1.609e+06	1.52546e+06	1.41283e+06	5.48224e+06	1.53872e+06	1.58953e+06	7.25056e+06	1.54627e+06	8.37688e+06	1.39744e+07	7.99493e+06	1.6806e+06	1.60465e+06	1.52491e+06		2.03555e+06	1.56412e+06	68.49	5.49415e+06	4.46558e+06	84.42	0.37	-1.43	0.0498834	1.3	0.285686	1.23356	199.001	76.4	1.3	Down
M200T122	3.20735e+06	1.68692e+06	2.86201e+06	1.49345e+06	2.38884e+06	1.48895e+06	2.21723e+06	1.58653e+06	3.17633e+06	6.03376e+06	4.69084e+06	4.74933e+06	2.65736e+06	2.52379e+06	4.99943e+06	2.20705e+06		2.11641e+06	1.95208e+06	31.33	3.87974e+06	3.93358e+06	36.36	0.55	-0.87	0.014763	1.83	0.158002	2.03077	200.056	122.2	2	Down
M200T535	179575	154444	256625	174434	156777	90030	127554	136463	512765	491255	481725	411647	190557	496755	312192	346528		159488	155611	30.41	405428	446686	28.19	0.39	-1.35	0.0003108	3.51	0.040447	2.4044	200.13	535.2	8.9	Down
M200T572	187483	36662	42146.5	68020.8	64597.2	125605	206553	112387	185679	215477	194604	417131	113350	143126	71299	202560		105432	90204	61.27	192903	190142	53.49	0.55	-0.87	0.0498834	1.3	0.285686	1.44743	200.101	572.4	9.5	Down
M201T104_1	165839	167677	162214	171780	549968	165370	258645	188995	88702.6	172738	156992	63084.6	156590	133662	278999	134788		228811	169728	58.41	148195	145689	43.46	1.54	0.63	0.0379176	1.42	0.250052	1.16744	201.077	104.2	1.7	Up
M201T107	985738	856946	1.10515e+06	776427	392361	260969	836554	1.02558e+06	762926	145792	262638	952546	281100	305217	250325	797057		779966	846750	38.68	469700	293159	66.59	1.66	0.73	0.0498834	1.3	0.285686	1.4067	201.052	107.4	1.8	Up
M201T538	921686	584597	829323	799002	641890	761444	439994	745048	1.12709e+06	1.54848e+06	915734	1.56042e+06	1.25807e+06	1.31774e+06	954377	618718		715373	753246	21.39	1.16258e+06	1.19258e+06	28	0.62	-0.7	0.00699301	2.16	0.1064	1.85744	201.023	537.9	9	Down
M201T662	471132	2.56073e+06	2.03855e+06	1.20828e+06	1.58148e+06	2.68818e+06	3.18498e+06	2.66335e+06	3.78458e+06	4.59344e+06	4.7787e+06	2.3491e+06	3.5325e+06	2.17185e+06	2.45222e+06	6.38522e+06		2.04959e+06	2.29964e+06	44.23	3.75595e+06	3.65854e+06	38.84	0.55	-0.87	0.0379176	1.42	0.250052	1.60266	201.15	662.3	11	Down
M201T92	2.72695e+06	2.92781e+06	2.60113e+06	2.59093e+06	2.51865e+06	2.47172e+06	2.52264e+06	2.96684e+06	2.79158e+06	2.34585e+06	2.3099e+06	2.75391e+06	2.38825e+06	2.45778e+06	2.49203e+06	658668		2.66584e+06	2.59603e+06	7.13	2.27475e+06	2.42301e+06	29.76	1.17	0.23	0.0498834	1.3	0.285686	1.03087	201.057	91.6	1.5	Up
M202T110	6.6916e+06	9.29443e+06	9.83359e+06	2.35878e+06	1.83134e+06	4.62681e+06	5.57459e+06	6.80222e+06	3.4236e+06	345228	1.51642e+06	4.00337e+06	3.32502e+06	3.99774e+06	5.34465e+06	316542		5.87667e+06	6.1331e+06	49.51	2.78407e+06	3.37431e+06	66.32	2.11	1.08	0.0281274	1.55	0.216677	1.51359	202.072	109.8	1.8	Up
M202T304	668013	745779	508110	798097	1.755e+06	505718	698709	843273	1.76243e+06	1.9005e+06	3.59511e+06	757907	1.59021e+06	770840	2.27677e+06	853204		815337	722244	48.94	1.68837e+06	1.67632e+06	56.84	0.48	-1.05	0.0104118	1.98	0.130233	1.79245	202.054	303.8	5.1	Down
M202T464	620355	962381	763618	689770	890162	642709	541705	531567	1.18394e+06	797489	1.57647e+06	1.24245e+06	1.39441e+06	805677	734375	1.06051e+06		705283	666239	22.22	1.09942e+06	1.12222e+06	27.81	0.64	-0.64	0.00699301	2.16	0.1064	1.90214	202.055	463.9	7.7	Down
M202T537	266640	152968	373494	198956	382107	136403	307655	210381	671888	637800	492646	634455	550760	696330	600230	258871		253575	238511	37.32	567872	617343	24.83	0.45	-1.16	0.0018648	2.73	0.0601903	2.23975	202.01	536.6	8.9	Down
M202T564	106517	97260.9	135215	175264	283024	413713	85123.2	349178	47889.1	96027.1	77512.9	46250.1	48107.4	141696	140304	16738.1		205662	155240	61.47	76815.5	62810.1	59.89	2.68	1.42	0.014763	1.83	0.158002	1.8261	202.11	563.5	9.4	Up
M202T85	1.54445e+07	1.85181e+07	2.0214e+07	1.60426e+07	2.73391e+07	2.59685e+07	2.47791e+07	2.52448e+07	5.01945e+07	5.67235e+07	5.57889e+07	3.41484e+07	3.76959e+07	2.8555e+07	2.50998e+07	4.99591e+07		2.16938e+07	2.24965e+07	21.73	4.22706e+07	4.38275e+07	29.43	0.51	-0.96	0.0010878	2.96	0.0513787	2.27037	202.041	85.2	1.4	Down
M203T114	106968	95795.1	100961	111758	144578	113271	157762	148833	49373.6	123349	60261.9	39598.3	26538.4	104607	103904	110211		122491	112515	19.62	77230.4	82083.1	48.26	1.59	0.67	0.0379176	1.42	0.250052	1.58745	203.093	113.8	1.9	Up
M203T132	6.43287e+06	7.33053e+06	7.7744e+06	6.64782e+06	7.83544e+06	5.70079e+06	6.62999e+06	6.02559e+06	5.16538e+06	5.78756e+06	5.08435e+06	6.24945e+06	5.41171e+06	5.99121e+06	6.10376e+06	7.39797e+06		6.79718e+06	6.63891e+06	11.53	5.89892e+06	5.88939e+06	12.61	1.15	0.2	0.0379176	1.42	0.250052	1.50329	203.049	132.4	2.2	Up
M203T503	410060	502446	444288	695062	346113	691698	667851	426100	293747	274702	291417	244237	185253	351417	167269	303032		522952	473367	26.96	263884	283059	23.48	1.98	0.99	0.0003108	3.51	0.040447	2.36648	203.129	502.8	8.4	Up
M203T70	1.00974e+06	1.17709e+06	912311	1.03597e+06	966749	1.13719e+06	1.00772e+06	938333	782643	916009	849200	736639	795554	1.01999e+06	916541	1.10808e+06		1.02314e+06	1.00873e+06	9.04	890583	882604	14.17	1.15	0.2	0.0498834	1.3	0.285686	1.5452	203.02	69.9	1.2	Up
M203T82_1	2.00059e+06	1.60737e+06	1.5189e+06	1.85827e+06	2.32234e+06	1.86644e+06	1.97036e+06	2.10314e+06	2.62852e+06	2.50299e+06	3.15937e+06	2.22061e+06	2.34284e+06	2.13108e+06	2.0397e+06	2.27669e+06		1.90593e+06	1.9184e+06	13.57	2.41272e+06	2.30976e+06	14.79	0.79	-0.34	0.0029526	2.53	0.0725285	1.96981	203.056	82.5	1.4	Down
M204T155	51101.4	62608.5	44693.5	47063.8	60714.6	57960.9	66803.8	73358.2	41234	77685.2	48025.2	30456	42127.3	42180.9	39791.1	49009.7		58038.1	59337.8	17.06	46313.7	42154.1	29.97	1.25	0.33	0.0379176	1.42	0.250052	1.33748	204.07	154.9	2.6	Up
M204T286	4.5412e+06	5.38557e+06	3.807e+06	4.41221e+06	3.35892e+06	4.02367e+06	4.68206e+06	3.70034e+06	502119	2.91196e+06	289624	71883.2	300144	3.02525e+06	3.55235e+06	2.40736e+06		4.23887e+06	4.21794e+06	15.26	1.63259e+06	1.45474e+06	90.13	2.6	1.38	0.0003108	3.51	0.040447	1.73358	204.033	285.6	4.8	Up
M204T303	201508	171032	205678	187327	177574	186006	217901	182927	232153	207548	305496	259439	250863	228066	198409	186224		191244	186666	8.22	233525	230110	16.45	0.82	-0.29	0.0104118	1.98	0.130233	1.76102	203.937	302.9	5	Down
M204T476	7773.77	9530.05	7457.8	6581.26	8496.02	7122.98	10168.5	7560.71	11732.9	12675.7	14995.2	12079.1	8859.04	13363.3	7962.94	7984.08		8086.38	7667.24	15.18	11206.5	11906	23.52	0.72	-0.47	0.0104118	1.98	0.130233	1.78034	204.016	476.1	7.9	Down
M205T121	2.35184e+06	1.58353e+06	2.63532e+06	1.4222e+06	1.49311e+06	1.78365e+06	1.54093e+06	1.46678e+06	3.21072e+06	2.21425e+06	3.11804e+06	3.20589e+06	2.84222e+06	1.79192e+06	2.59155e+06	1.89696e+06		1.78467e+06	1.56223e+06	25.61	2.60894e+06	2.71688e+06	22.27	0.68	-0.55	0.00699301	2.16	0.1064	1.91572	205.036	121.2	2	Down
M205T150	3.75833e+06	1.38211e+07	1.20805e+07	5.73627e+06	4.85302e+06	6.16334e+06	4.99407e+06	1.10608e+07	269643	3.2047e+06	110858	154072	173314	4.69751e+06	2.83072e+06	8.67545e+06		7.80843e+06	5.9498e+06	49.61	2.51453e+06	1.55018e+06	121.34	3.11	1.63	0.004662	2.33	0.0886941	1.81667	205.035	149.6	2.5	Up
M206T104	443696	474348	403063	435462	580226	373705	484032	363323	474880	457204	424934	561549	695650	580996	478645	625605		444732	439579	15.73	537433	520097	17.48	0.83	-0.27	0.0498834	1.3	0.285686	1.46081	206.049	103.8	1.7	Down
M207T104	1.81561e+06	2.44894e+06	2.289e+06	2.11495e+06	1.31646e+06	2.24301e+06	1.9756e+06	2.41147e+06	713148	1.85919e+06	1.39459e+06	845895	1.13497e+06	1.9753e+06	1.56644e+06	1.55513e+06		2.07688e+06	2.17898e+06	18.03	1.38058e+06	1.47486e+06	32.85	1.5	0.59	0.00699301	2.16	0.1064	1.75867	207.046	103.5	1.7	Up
M207T622	443120	268991	335084	354720	754195	320592	305443	338687	914176	476288	1.21773e+06	508780	708291	351088	963613	408180		390104	336886	39.83	693518	608535	44.83	0.56	-0.83	0.0104118	1.98	0.130233	1.79004	207.103	622.4	10.4	Down
M208T109	2.07251e+07	1.76797e+07	1.70214e+07	1.74547e+07	1.37958e+07	1.95928e+07	1.61791e+07	1.57146e+07	1.45328e+07	1.31489e+07	1.19411e+07	1.41873e+07	1.12499e+07	1.63908e+07	1.68632e+07	1.61361e+07		1.72704e+07	1.7238e+07	12.62	1.43063e+07	1.436e+07	14.61	1.21	0.27	0.0206682	1.68	0.184282	1.69371	208.028	109	1.8	Up
M208T126	794307	1.06805e+06	1.091e+06	682125	475648	1.11536e+06	1.12719e+06	315552	406289	649609	222248	795212	492117	448894	261265	671581		833654	931179	38.14	493402	470506	40.84	1.69	0.76	0.0379176	1.42	0.250052	1.52182	208.061	125.5	2.1	Up
M208T152	5.90254e+06	6.21327e+06	5.1334e+06	3.43787e+06	6.43082e+06	6.77239e+06	5.68966e+06	5.18147e+06	4.96897e+06	3.26783e+06	1.35451e+06	3.75791e+06	4.98652e+06	529397	3.93623e+06	3.97476e+06		5.59518e+06	5.7961e+06	18.63	3.34702e+06	3.84707e+06	48.1	1.67	0.74	0.0029526	2.53	0.0725285	1.46299	208.028	152.1	2.5	Up
M208T211	4.64431e+06	5.03088e+06	4.93168e+06	5.83505e+06	5.21045e+06	7.91347e+06	7.35552e+06	7.40244e+06	3.48335e+06	5.16879e+06	3.14805e+06	1.84806e+06	2.35546e+06	5.74655e+06	3.56708e+06	5.54065e+06		6.04047e+06	5.52275e+06	21.7	3.85725e+06	3.52521e+06	38.13	1.57	0.65	0.0281274	1.55	0.216677	1.76836	208.028	210.7	3.5	Up
M208T85	1.00632e+08	4.18894e+07	9.44753e+07	1.58573e+08	4.80528e+07	1.34363e+08	7.08038e+07	7.03931e+07	3.25659e+07	3.55793e+07	2.70994e+07	2.91482e+07	4.38494e+07	1.08068e+08	7.38518e+07	6.80697e+07		8.98979e+07	8.26396e+07	45.34	5.22789e+07	3.97143e+07	54.75	1.72	0.78	0.0498834	1.3	0.285686	1.53763	207.969	85.2	1.4	Up
M209T289	3.79993e+06	2.5663e+06	3.02262e+06	3.06586e+06	2.39039e+06	2.61223e+06	2.81182e+06	2.75422e+06	2.12759e+06	2.05026e+06	722836	3.88173e+06	2.42091e+06	108836	1.6703e+06	2.5705e+06		2.87792e+06	2.78302e+06	15.15	1.94412e+06	2.08893e+06	59.46	1.48	0.57	0.0281274	1.55	0.216677	1.16947	209.046	289.2	4.8	Up
M209T324	304053	517337	460368	330135	481618	402489	499702	466142	729879	982767	834443	751594	836617	626606	640500	679601		432730	463255	18.3	760251	740737	15.76	0.57	-0.81	0.0001554	3.81	0.0365579	2.46396	209.104	324.4	5.4	Down
M209T603_1	142664	468771	141355	293702	398868	403980	272329	205130	124612	105923	222730	72004.9	110034	152749	168497	210946		290850	283015	42.73	145937	138681	36.16	1.99	0.99	0.0206682	1.68	0.184282	1.80927	209.118	602.7	10	Up
M210T211	146768	39561.3	45186.3	38301.5	36892	39832	116765	31947.9	126030	39581.5	147098	191093	96209.3	91389	200126	67855.8		61906.7	39696.7	71.09	119923	111120	47.61	0.52	-0.95	0.0281274	1.55	0.216677	1.61679	210.024	210.6	3.5	Down
M210T303_1	289020	380579	370354	307346	301844	364655	402430	157613	528066	344865	785858	439166	489611	471012	367046	474788		321730	336000	24.3	487552	472900	27.77	0.66	-0.6	0.00699301	2.16	0.1064	1.79813	210.049	303.5	5.1	Down
M210T303_2	161863	126433	196352	140780	115470	416538	99877.4	325650	455288	226665	701214	588385	814417	152289	388112	245396		197870	151322	57.37	446471	421700	53.49	0.44	-1.17	0.014763	1.83	0.158002	1.69698	210.077	303	5	Down
M210T326	588057	564983	820015	483182	346987	570601	373579	444785	408823	229645	257623	355014	402934	282882	317392	344409		524024	524083	28.62	324840	330900	20.1	1.61	0.69	0.0029526	2.53	0.0725285	2.03576	210.026	325.6	5.4	Up
M210T334	21727.9	16326.9	33524.9	16748.9	5533.75	32951.5	13634.5	3563.17	43902.2	27922.7	41864.6	94658.2	38162	27269.9	25897.2	36616.6		18001.5	16537.9	61.78	42036.7	37389.3	53.15	0.43	-1.22	0.004662	2.33	0.0886941	1.7704	210.108	334	5.6	Down
M210T364	1.97648e+07	2.85645e+07	3.66852e+07	7.65769e+07	4.31086e+07	7.92366e+07	7.10058e+07	6.68696e+07	6.66907e+07	1.15793e+08	7.71299e+07	5.48827e+07	5.75791e+07	8.30083e+07	7.98572e+07	8.48707e+07		5.27265e+07	5.49891e+07	44.34	7.74765e+07	7.84936e+07	24.79	0.68	-0.56	0.0498834	1.3	0.285686	1.4269	209.99	363.9	6.1	Down
M210T483	102779	25727.1	251075	13924.8	17390.9	22517.1	24511.6	114336	199128	219951	35235.8	362895	332321	652516	501518	38293.9		71532.7	25119.4	115.77	292732	276136	73.57	0.24	-2.03	0.0104118	1.98	0.130233	1.69757	210.121	482.7	8	Down
M210T69	164201	173653	165401	164030	150342	147071	158886	141036	1.18053e+06	147011	1.20046e+06	1.18877e+06	1.30183e+06	171212	170806	161752		158077	161458	6.93	690296	675869	81.89	0.23	-2.13	0.0498834	1.3	0.285686	1.6092	210.008	68.6	1.1	Down
M211T125_1	566541	1.39861e+06	1.02588e+06	1.18049e+06	770838	1.1344e+06	1.03336e+06	1.27061e+06	181525	579969	21204.5	48331.4	250064	754236	516567	710793		1.04759e+06	1.08388e+06	25.69	382836	383315	76.67	2.74	1.45	0.0010878	2.96	0.0513787	1.80467	211.072	124.8	2.1	Up
M211T625	1.16465e+06	1.22567e+06	2.16939e+06	2.11049e+06	290243	1.54665e+06	1.19113e+06	1.64587e+06	1.31344e+06	897100	838849	1.23556e+06	697544	917618	154747	1.12205e+06		1.41801e+06	1.38616e+06	42.46	897112	907359	40.7	1.58	0.66	0.0498834	1.3	0.285686	1.10862	211.134	625.4	10.4	Up
M211T653	1.67603e+06	1.79416e+06	1.67561e+06	3.50489e+06	4.28672e+06	2.06463e+06	2.71618e+06	1.76786e+06	4.04589e+06	7.99945e+06	4.00394e+06	5.8004e+06	2.22252e+06	3.76848e+06	1.87273e+06	4.79909e+06		2.43576e+06	1.9294e+06	40.46	4.31406e+06	4.02491e+06	45.38	0.56	-0.82	0.0206682	1.68	0.184282	1.56837	211.134	653.3	10.9	Down
M212T120	7.64154e+06	8.34302e+06	7.04292e+06	7.43478e+06	4.18522e+06	1.40055e+07	6.31809e+06	6.46366e+06	4.24023e+07	6.06275e+06	5.34e+07	1.69099e+07	3.2468e+07	9.92171e+06	7.97324e+06	1.11466e+07		7.67935e+06	7.23885e+06	36.98	2.25356e+07	1.40282e+07	79.55	0.34	-1.55	0.0281274	1.55	0.216677	1.62144	212.023	119.6	2	Down
M212T468	35219.3	20443.6	20510.2	5854.89	50077.2	6011.24	11774.7	48043.9	83505.7	96509.1	64766.2	14615.7	69147.3	7224.22	61294.9	36909.7		24741.9	20476.9	71.76	54246.6	63030.6	58.74	0.46	-1.13	0.0498834	1.3	0.285686	1.41619	212.129	468.2	7.8	Down
M213T264	301653	165019	182358	56609.3	266468	181598	59146	192441	289045	341559	267326	247220	306725	364588	403200	245953		175662	181978	49.23	308202	297885	18.58	0.57	-0.81	0.004662	2.33	0.0886941	1.86432	213.077	264	4.4	Down
M213T419	23552	168325	77374.7	78791.4	176365	174114	123468	117632	188782	297374	207960	79066.4	388855	205548	156733	393269		117453	120550	46.88	239699	206754	46.41	0.49	-1.03	0.0104118	1.98	0.130233	1.56937	213.005	419.2	7	Down
M213T473	87239.2	197616	234203	259299	668188	340814	247560	419496	807090	903233	1.16861e+06	270681	576639	184873	540973	598522		306802	253429	57.21	631328	587581	51.33	0.49	-1.04	0.0498834	1.3	0.285686	1.59621	212.979	472.6	7.9	Down
M213T592	137162	187101	198710	164936	170583	154098	181643	150106	433459	155643	368618	214688	205911	244005	279295	185626		168042	167759	12.27	260906	229347	36.62	0.64	-0.63	0.00699301	2.16	0.1064	1.77424	213.056	591.7	9.9	Down
M213T719	140068	109117	223029	143276	192158	213654	274713	339525	110691	175467	102041	90492.4	90950.5	121943	243879	61500.4		204443	202906	37.32	124620	106366	46.79	1.64	0.71	0.0281274	1.55	0.216677	1.57387	213.16	719.3	12	Up
M213T82_1	3.29078e+06	2.59328e+06	3.66432e+06	3.86422e+06	5.12129e+06	3.50631e+06	3.93693e+06	3.58482e+06	5.68855e+06	5.34553e+06	6.17965e+06	4.31828e+06	4.07041e+06	4.84558e+06	4.36318e+06	4.6396e+06		3.69524e+06	3.62457e+06	19.26	4.93135e+06	4.74259e+06	15.01	0.75	-0.42	0.0029526	2.53	0.0725285	1.98881	212.839	82.5	1.4	Down
M213T82_2	3.12733e+06	2.99762e+06	3.87453e+06	2.79322e+06	3.85391e+06	2.85388e+06	3.57779e+06	3.72791e+06	2.26748e+06	1.8304e+06	2.63507e+06	2.70123e+06	2.60242e+06	2.74504e+06	2.896e+06	2.34769e+06		3.35077e+06	3.35256e+06	13.6	2.50316e+06	2.61874e+06	13.6	1.34	0.42	0.000621601	3.21	0.0444681	2.10156	212.886	82	1.4	Up
M213T89	857880	763768	753165	751524	498472	1.03049e+06	863062	888072	472298	458221	555257	555923	537146	589747	484019	663445		800804	810824	19.17	539507	546202	12.65	1.48	0.57	0.0029526	2.53	0.0725285	2.21073	213.037	88.6	1.5	Up
M214T155	1.0297e+06	241407	738064	194565	779855	442904	929412	432877	790110	1.17961e+06	1.09167e+06	986622	1.10449e+06	304505	928493	943780		598598	590484	52.45	916160	965201	30.08	0.65	-0.61	0.0379176	1.42	0.250052	1.46351	214.072	154.9	2.6	Down
M214T429	29094.6	20630.9	21228.2	4120.36	41738.2	15034.3	27196.5	36452	22455.6	48499.7	34660.6	20178	44391.7	43328.4	36629.6	51810.4		24436.9	24212.3	48.89	37744.3	39979	30.73	0.65	-0.63	0.0498834	1.3	0.285686	1.45039	214.018	429.2	7.2	Down
M214T92	672184	212149	682476	611263	162398	725082	757041	526205	1.66885e+06	793542	1.86278e+06	1.08312e+06	1.21932e+06	392988	1.02475e+06	1.61282e+06		543600	641724	42.54	1.20727e+06	1.15122e+06	40.7	0.45	-1.15	0.004662	2.33	0.0886941	1.81193	214.077	91.7	1.5	Down
M215T109_2	179529	40074.6	176907	32888.9	213696	134613	111247	160911	206593	199316	186392	197319	220539	206776	196692	193396		131233	147762	50.29	200878	198317	5.16	0.65	-0.61	0.00699301	2.16	0.1064	1.62504	215.14	109.3	1.8	Down
M215T113	1.15823e+06	891235	622287	789204	1.06859e+06	616182	1.17199e+06	986971	467594	979188	615169	361311	280393	611210	40142.6	563856		913087	939103	24.32	489858	515725	56.62	1.86	0.9	0.0018648	2.73	0.0601903	1.52811	215.019	112.9	1.9	Up
M215T471	2.14652e+06	1.0781e+06	548837	2.04543e+06	1.93454e+06	118841	150897	485200	107639	413448	151942	101553	303900	14268.2	1.23949e+06	103733		1.06355e+06	813469	81.2	304496	129791	131	3.49	1.8	0.0281274	1.55	0.216677	1.39384	215.129	470.6	7.8	Up
M215T83	5.37811e+06	4.6916e+06	7.2239e+06	5.25943e+06	4.25947e+06	5.03754e+06	4.48847e+06	5.10152e+06	1.27686e+07	4.54585e+06	1.51301e+07	1.11364e+07	6.64174e+06	6.49781e+06	5.09609e+06	1.08891e+07		5.18e+06	5.06953e+06	17.59	9.08822e+06	8.76544e+06	42.97	0.57	-0.81	0.0379176	1.42	0.250052	1.71679	215.032	82.6	1.4	Down
M216T153	227870	35863.4	127795	147954	118669	110019	241394	102261	272401	69407.5	433568	312945	123676	322058	344868	203538		138978	123232	48.52	260308	292673	46.43	0.53	-0.91	0.0498834	1.3	0.285686	1.37423	216.034	153.4	2.6	Down
M216T371	279832	146067	354714	60357.1	302561	57382.8	247282	94639.1	514740	554789	392281	504716	342143	344090	390328	310955		192854	196674	60.88	419255	391305	22.02	0.46	-1.12	0.0010878	2.96	0.0513787	2.0632	215.528	371	6.2	Down
M216T407	124337	21182.3	124316	74022.5	160700	76383.9	86256.8	106741	170262	200143	299502	139435	141593	137819	247066	148961		96742.5	96499.2	43.61	185598	159612	32.13	0.52	-0.94	0.0018648	2.73	0.0601903	1.91247	216.07	406.9	6.8	Down
M216T92	483095	570124	516258	501679	459498	390549	538636	463055	564454	662470	612459	547975	512011	719711	593622	1.02597e+06		490362	492387	11.22	654834	603041	25	0.75	-0.42	0.0029526	2.53	0.0725285	1.8586	216.076	91.6	1.5	Down
M217T100	1.85955e+07	1.69561e+07	1.3764e+07	1.74747e+07	3.68984e+07	2.52974e+07	2.14112e+07	1.88248e+07	1.69081e+07	1.34159e+06	1.61352e+07	411506	1.31829e+07	1.21035e+06	1.45418e+07	1.79139e+06		2.11528e+07	1.87101e+07	34.04	8.19035e+06	7.48716e+06	92.46	2.58	1.37	0.0010878	2.96	0.0513787	1.68851	217.083	100.1	1.7	Up
M217T375	593618	703496	395442	521282	383002	983855	477813	364329	603235	189545	325018	491355	293106	369601	390277	189307		552855	499548	37.81	356430	347309	39.85	1.55	0.63	0.0498834	1.3	0.285686	1.64873	217.108	374.5	6.2	Up
M217T531	21104.9	139558	11955.2	25029.9	142958	55500.2	96770.8	86843	7771.08	21614.2	57924.1	32330	10772.1	19905.7	4408.48	39923.2		72465	71171.6	72.09	24331.1	20759.9	74.78	2.98	1.57	0.0498834	1.3	0.285686	1.54569	216.964	531.5	8.9	Up
M217T99	366431	538596	325812	304029	183508	412420	394193	411393	431308	390263	930291	701239	576590	479366	382963	707813		367048	380312	27.93	574979	527978	33.56	0.64	-0.65	0.0206682	1.68	0.184282	1.63656	217.035	99.1	1.7	Down
M218T151	4.35918e+08	3.93058e+08	4.61863e+08	3.80413e+08	2.23797e+08	4.28966e+08	3.80954e+08	3.59679e+08	3.92676e+07	2.67142e+08	2.65612e+07	3.62836e+07	4.71229e+07	2.87758e+08	2.46004e+08	2.10212e+08		3.83081e+08	3.87006e+08	19.01	1.45044e+08	1.28667e+08	80.89	2.64	1.4	0.0010878	2.96	0.0513787	1.93583	218.104	151	2.5	Up
M218T386	262401	162485	55582.8	125528	138079	136111	180399	161730	55917.4	145055	54621.1	53817.9	47864.1	211515	49193.7	43814.4		152789	149905	38.03	82724.9	54219.5	74.61	1.85	0.89	0.0379176	1.42	0.250052	1.69978	218.013	386.1	6.4	Up
M218T403	664247	341040	856276	248527	389292	325019	312455	590463	1.78158e+06	719594	3.08499e+06	3.71627e+06	2.17186e+06	325950	990677	532135		465915	365166	45.84	1.66538e+06	1.38613e+06	75	0.28	-1.84	0.014763	1.83	0.158002	1.82433	218.082	402.8	6.7	Down
M219T121	2.06669e+06	798157	809384	5.90267e+06	2.47017e+06	2.58607e+06	3.11944e+06	6.62585e+06	529995	2.44849e+06	1.31352e+06	730019	553435	1.74111e+06	1.85236e+06	1.91338e+06		3.0473e+06	2.52812e+06	70.75	1.38529e+06	1.52732e+06	51.85	2.2	1.14	0.0281274	1.55	0.216677	1.31204	219.047	121.3	2	Up
M219T31_2	268120	244458	68756.4	248533	193380	275349	66379.9	236100	51466.6	198062	155783	43230.3	44828.8	68084.2	42500.3	164722		200134	240279	42.68	96084.7	59775.4	67.84	2.08	1.06	0.0104118	1.98	0.130233	1.53668	218.852	30.8	0.5	Up
M219T413	8396.69	37994.6	16751	27196.2	12777.5	33540.1	13501.4	47334.6	13038.3	3687.02	3978.1	11186.6	34449.3	9959.22	1458.06	9213.66		24686.5	21973.6	56.67	10871.3	9586.44	95.34	2.27	1.18	0.0281274	1.55	0.216677	1.75702	218.999	413.3	6.9	Up
M220T696	586084	474131	634811	815259	853626	1.47682e+06	1.3678e+06	1.48149e+06	299355	372301	817567	302295	360202	381661	423332	845404		961252	834442	43.42	475265	376981	47.07	2.02	1.02	0.0104118	1.98	0.130233	1.83897	220.147	696.4	11.6	Up
M221T620	90599.1	212189	134594	82374.9	118709	77885.2	92602.4	91702.5	220452	291915	231363	240293	325647	437161	347462	207036		112582	92152.4	39.55	287666	266104	27.5	0.39	-1.35	0.0003108	3.51	0.040447	2.44277	221.082	619.6	10.3	Down
M221T741	2.16491e+07	2.04381e+07	2.39546e+07	1.42682e+07	2.18193e+07	2.64455e+07	2.83249e+07	3.49912e+07	5.54089e+07	4.10088e+07	5.10239e+07	2.91628e+07	3.8613e+07	1.8791e+07	3.46746e+07	5.4345e+07		2.39864e+07	2.2887e+07	25.56	4.03785e+07	3.98109e+07	31.91	0.59	-0.75	0.014763	1.83	0.158002	1.92148	221.121	741.4	12.4	Down
M222T336	11458.1	11877.2	43360.8	15620.4	10336.7	42540.1	28445.4	9171.63	69863.1	27715.3	70747.3	56736.9	73883.3	15376.4	42255.2	17027.3		21601.3	13748.8	67.16	46700.6	49496.1	52.43	0.46	-1.11	0.0379176	1.42	0.250052	1.55756	222.097	336.1	5.6	Down
M222T34	138215	163282	161538	128288	130169	173936	166778	167388	180196	178008	195399	175989	178287	144045	133159	182623		153699	162410	11.95	170963	178148	12.31	0.9	-0.15	0.0281274	1.55	0.216677	1.14588	221.842	33.7	0.6	Down
M222T382	115195	81485.2	125940	149800	122653	102724	104335	79690.1	19289.5	21397.1	118035	31543.3	24390.4	33767.8	34353.8	17121.1		110228	109765	21.25	37487.2	27966.9	88.61	2.94	1.56	0.0029526	2.53	0.0725285	2.33545	222.077	381.8	6.4	Up
M222T432	325355	259717	409644	239924	384235	414717	225425	238431	904122	735602	1.49208e+06	815215	801298	225833	757894	363247		312181	292536	26.06	761911	779596	49.73	0.41	-1.29	0.0206682	1.68	0.184282	2.01255	222.08	432.2	7.2	Down
M222T54	370989	326919	319151	321661	290987	327257	354508	332125	350514	377921	339735	413141	434021	446303	420119	386660		330450	327088	7.24	396052	399900	9.78	0.83	-0.26	0.0018648	2.73	0.0601903	2.05493	221.8	53.7	0.9	Down
M222T752	2.86898e+06	2.67069e+06	4.50934e+06	1.16185e+07	6.62737e+06	3.90382e+06	3.39155e+06	5.66834e+06	2.20668e+06	2.21152e+06	2.98935e+06	489760	895955	1.77159e+06	2.90791e+06	619345		5.15732e+06	4.20658e+06	57.1	1.76151e+06	1.98914e+06	56.34	2.93	1.55	0.0018648	2.73	0.0601903	1.97385	221.8	752.1	12.5	Up
M223T118	395056	136049	59213.3	142856	165667	147019	178082	284273	303398	228208	404579	535083	355890	154511	225404	179249		188527	156343	55.17	298290	265803	43.11	0.63	-0.66	0.0379176	1.42	0.250052	1.36451	223.047	117.5	2	Down
M223T752	225968	277399	299852	92850	938124	220355	123653	122576	1.18409e+06	2.41494e+06	2.2028e+06	980331	1.45692e+06	221282	458007	358661		287597	223162	95.11	1.15963e+06	1.08221e+06	71.4	0.25	-2.01	0.004662	2.33	0.0886941	2.00501	223.134	752.2	12.5	Down
M224T102	449176	24974.7	158882	28398.2	120036	244484	21774.7	27095.7	298610	190911	264917	408747	370146	271077	293524	303706		134353	74216.9	112.32	300205	296067	22.09	0.45	-1.16	0.014763	1.83	0.158002	1.9127	224.103	101.7	1.7	Down
M224T149_2	85939.7	42809	94549.1	68720.4	116853	40281.3	61984.4	56530.8	220352	128554	341127	151167	140489	53858.7	138981	112382		70958.4	65352.4	37.34	160864	139735	53.51	0.44	-1.18	0.00699301	2.16	0.1064	1.99008	224.078	148.8	2.5	Down
M224T331	36276.1	17537.2	32845.8	15036.3	17996.7	17354.3	22758.6	15419.7	24935.3	48044.5	37454	39744	28640	26728.9	50412.9	30215.6		21903.1	17766.9	37.46	35771.9	33834.8	27.24	0.61	-0.71	0.0104118	1.98	0.130233	2.02427	224.104	330.9	5.5	Down
M224T39	402095	387046	387114	384411	369957	476782	481197	409458	398675	502687	395718	559274	418408	521856	407675	589280		412257	394605	10.4	474197	460548	16.52	0.87	-0.2	0.0498834	1.3	0.285686	1.22964	223.798	39.1	0.7	Down
M224T445	61866.2	39612.4	247471	299052	65047	50309.4	242973	212804	356994	343157	177707	334950	350262	270612	187178	234321		152392	138925	70.75	281898	302781	26.51	0.54	-0.89	0.0379176	1.42	0.250052	1.61826	224.006	445.3	7.4	Down
M224T54	477150	527442	436039	375274	453503	495197	565020	498668	532960	590412	556318	509436	572071	486984	526419	577648		478537	486173	12.15	544031	544639	6.63	0.88	-0.19	0.0206682	1.68	0.184282	1.71943	223.798	53.8	0.9	Down
M224T562	116348	146674	115766	214613	49413.1	113156	205201	213831	43678.9	22716.2	55007.4	78871.4	89213.7	29347.5	85230.9	83773.4		146875	131511	40.7	60979.9	66939.4	43.94	2.41	1.27	0.0029526	2.53	0.0725285	1.99656	224.056	561.7	9.4	Up
M224T69	269314	266104	288158	199649	252374	278558	339947	342011	420640	512471	439967	519668	533158	230397	353630	344348		279514	273936	16.58	419285	430304	25.14	0.67	-0.59	0.00699301	2.16	0.1064	1.9084	224.027	68.5	1.1	Down
M224T747	90420.5	133429	384433	509935	213644	209043	379540	538868	57178.7	156711	63400.6	27079.7	107783	99571.1	99453.2	179662		307414	296592	55.2	98855	99512.1	51.44	3.11	1.64	0.00699301	2.16	0.1064	1.93032	224.166	747	12.4	Up
M225T703	432964	135810	286704	150480	680246	149490	340150	305270	679121	581104	698839	641060	385615	535351	358915	541522		310139	295987	59.11	552691	561313	22.87	0.56	-0.83	0.014763	1.83	0.158002	1.91997	225.092	703.1	11.7	Down
M225T83	3.10121e+06	3.76669e+06	3.70382e+06	2.72146e+06	3.51799e+06	4.01476e+06	3.67811e+06	3.67028e+06	5.02774e+06	5.34539e+06	6.17658e+06	4.98639e+06	3.77754e+06	4.40803e+06	3.43794e+06	4.93454e+06		3.52179e+06	3.67419e+06	11.76	4.76177e+06	4.96047e+06	18.34	0.74	-0.44	0.00699301	2.16	0.1064	1.99286	224.819	82.6	1.4	Down
M225T85	1.0741e+07	1.22994e+07	1.24306e+07	1.31029e+07	1.21214e+07	1.10546e+07	1.34343e+07	1.17501e+07	1.12525e+07	2.17051e+06	1.14365e+07	1.19714e+07	1.02645e+07	1.22576e+07	1.11147e+07	9.60677e+06		1.21168e+07	1.22104e+07	7.64	1.00093e+07	1.11836e+07	32.79	1.21	0.28	0.0498834	1.3	0.285686	1.09562	224.998	84.5	1.4	Up
M226T449	90982.6	525609	378661	335646	351333	326965	394704	499891	236388	257462	52842.5	38685.5	623258	47144.6	207884	56314.8		362974	364997	36.46	189997	132099	104.27	1.91	0.93	0.0281274	1.55	0.216677	1.5346	226.054	448.9	7.5	Up
M226T485	130941	68674.5	90150	53762.7	216175	283341	60914.1	142913	67861.1	66473.5	165608	59367.3	60754.3	31595.1	52662.8	52224.1		130859	110545	62.64	69568.2	60060.8	58.13	1.88	0.91	0.0379176	1.42	0.250052	1.31958	226.145	484.6	8.1	Up
M226T487	17098.6	22593.5	13496.6	9414.96	91624.5	21186.4	35413.2	59032.6	197120	153773	199455	72578.3	142316	17377.1	34628.2	59597.6		33732.5	21889.9	83.5	109606	107447	66.11	0.31	-1.7	0.0206682	1.68	0.184282	1.77719	226.046	486.6	8.1	Down
M226T90_2	1.18776e+06	1.26598e+06	1.29324e+06	1.09705e+06	1.60357e+06	1.31595e+06	1.77982e+06	1.34509e+06	1.8177e+06	1.93391e+06	2.06033e+06	1.80173e+06	1.60834e+06	1.53003e+06	1.39159e+06	1.97741e+06		1.36106e+06	1.3046e+06	16.42	1.76513e+06	1.80971e+06	13.27	0.77	-0.38	0.0029526	2.53	0.0725285	2.00814	226.065	89.6	1.5	Down
M227T117	535869	821221	625007	505040	501915	591853	400906	650280	339784	476420	377551	542445	268204	263107	243365	648581		579011	563861	21.75	394932	358667	37.37	1.47	0.55	0.0281274	1.55	0.216677	1.71799	226.978	116.7	1.9	Up
M227T154	1.1546e+06	936084	436124	482546	1.4284e+06	424676	414609	438780	1.34974e+06	1.79527e+06	1.92543e+06	2.3721e+06	1.44451e+06	2.57474e+06	1.88785e+06	446297		714477	460663	56.33	1.72449e+06	1.84156e+06	38.38	0.41	-1.27	0.0029526	2.53	0.0725285	1.90573	227.067	153.6	2.6	Down
M227T224	2.02585e+06	2.19272e+06	1.68642e+06	2.25819e+06	1.61028e+06	2.32871e+06	2.45093e+06	2.15149e+06	41.059	2.0498e+06	1.22143e+06	1.09911e+06	72.6522	946685	1.42457e+06	1.23734e+06		2.08807e+06	2.1721e+06	14.33	997382	1.16027e+06	69.88	2.09	1.07	0.0010878	2.96	0.0513787	1.2203	227.067	223.6	3.7	Up
M227T283	224629	180315	269641	188066	46490	332964	162237	215817	133374	21315.8	106460	216424	182383	128326	26679.3	147068		202520	201942	41.25	120254	130850	56.92	1.68	0.75	0.0379176	1.42	0.250052	1.32903	227.14	282.7	4.7	Up
M227T354	1.02988e+06	2.1165e+06	1.57255e+06	1.44346e+06	1.23409e+06	1.801e+06	1.68319e+06	1.79907e+06	776171	1.49967e+06	827656	1.59952e+06	852999	1.05797e+06	1.11374e+06	1.23009e+06		1.58497e+06	1.62787e+06	21.81	1.11973e+06	1.08586e+06	27.53	1.42	0.5	0.0206682	1.68	0.184282	1.81356	227.013	354.3	5.9	Up
M227T419	48856.5	58667.3	40992.5	39198.1	32055.2	60809.4	40714.4	52337.1	35493.1	35996.6	33950.1	33867.5	38602	35870.5	45339.6	38720.3		46703.8	44924.5	21.68	37230	35933.6	10.07	1.25	0.33	0.0281274	1.55	0.216677	1.57741	227.031	418.6	7	Up
M227T483	4.91358e+06	3.1719e+06	5.12746e+06	3.29849e+06	9.5812e+06	4.37589e+06	5.78577e+06	6.86872e+06	5.86578e+06	3.38405e+06	2.94689e+06	2.62822e+06	3.2224e+06	3.18013e+06	4.2239e+06	2.64193e+06		5.39038e+06	5.02052e+06	38.74	3.51166e+06	3.20126e+06	30.66	1.53	0.62	0.0379176	1.42	0.250052	1.49366	227.129	482.9	8	Up
M227T70	691738	502996	558158	575939	517214	554079	613337	544481	911504	637335	521105	784822	813250	801309	747834	554454		569743	556118	10.5	721452	766328	18.94	0.79	-0.34	0.0281274	1.55	0.216677	1.65356	227.018	70	1.2	Down
M227T83	1.19574e+06	1.57028e+06	1.47603e+06	1.47166e+06	951962	1.38127e+06	746031	1.17419e+06	9.2243e+06	1.06427e+06	6.43753e+06	7.75693e+06	6.06773e+06	3.25377e+06	1.95829e+06	6.3826e+06		1.2459e+06	1.28851e+06	22.93	5.26818e+06	6.22517e+06	54.54	0.24	-2.08	0.004662	2.33	0.0886941	2.1111	226.816	82.6	1.4	Down
M228T32	16088.7	15109.1	10585.8	16686.9	14340.8	45765	30569	59909.7	24521.2	61163.3	89034.1	121694	45926.7	19237.4	86517.6	30634.8		26131.9	16387.8	68.43	59841.1	53545	61.02	0.44	-1.2	0.014763	1.83	0.158002	1.56355	227.937	31.6	0.5	Down
M228T374_1	51322.5	44099.6	52722	9766.15	6076.9	169509	10809	238318	358433	4936	398022	250410	180301	262220	47355.5	261790		72827.9	47711.1	116.86	220433	256100	62.52	0.33	-1.6	0.0498834	1.3	0.285686	1.16796	228.033	373.6	6.2	Down
M228T407	8725.57	29324.8	7567.31	5685.79	33433.6	16098.5	15146	72325	66939.8	134248	190246	14200.8	53237.2	162132	122512	71177.2		23538.3	15622.2	94.05	101837	96844.7	58.84	0.23	-2.11	0.0104118	1.98	0.130233	2.04991	228.114	407.4	6.8	Down
M228T457	78045.7	220768	100214	104471	263032	159379	181389	126482	15256.7	169166	98596.2	84439.1	62549.7	93230.9	80242.2	147343		154223	142930	41.73	93853.1	88835	50.92	1.64	0.72	0.0498834	1.3	0.285686	1.30857	228.088	457	7.6	Up
M228T547_1	302201	622962	958840	320060	279056	473096	800118	298094	167052	275285	226243	281178	306596	608154	259648	332170		506803	396578	51.52	307041	278231	42.88	1.65	0.72	0.0498834	1.3	0.285686	1.43898	228.132	547.5	9.1	Up
M228T559	91491.1	57240.2	49914.8	74405.5	101121	70872.3	88571.9	19273	128618	134498	121747	107329	89743.5	133439	110592	118373		69111.2	72638.9	38.39	118042	120060	12.83	0.59	-0.77	0.000621601	3.21	0.0444681	1.90223	228.103	558.8	9.3	Down
M228T674	23880	17850.6	26736.6	25837.6	37174.4	51514.1	74234.3	65484.9	90932.8	99516.9	116484	47785.4	33510.5	82480.1	77590.2	34178.5		40339.1	31955.5	52.07	72809.8	80035.1	42.58	0.55	-0.85	0.0281274	1.55	0.216677	1.56133	228.132	673.7	11.2	Down
M228T92	4.07163e+06	6.05378e+06	3.94603e+06	3.79767e+06	4.24335e+06	5.07971e+06	4.33694e+06	4.07359e+06	3.44932e+06	2.6711e+06	4.35214e+06	4.0338e+06	2.84863e+06	3.3777e+06	3.17972e+06	3.61121e+06		4.45034e+06	4.15847e+06	16.96	3.44045e+06	3.41351e+06	16.39	1.29	0.37	0.0104118	1.98	0.130233	1.91334	228.064	92.1	1.5	Up
M229T108	1.12483e+07	6.96129e+06	1.21397e+07	9.62423e+06	1.3974e+07	1.38124e+07	9.3795e+06	1.04469e+07	2.50876e+07	1.12011e+07	2.21278e+07	1.7528e+07	2.78848e+07	1.1551e+07	1.49343e+07	1.23935e+07		1.09483e+07	1.08476e+07	21.62	1.78385e+07	1.62311e+07	36.31	0.61	-0.7	0.014763	1.83	0.158002	1.79337	228.994	107.6	1.8	Down
M229T544	1.38935e+06	1.56465e+06	1.4396e+06	2.02426e+06	684493	1.81517e+06	1.20764e+06	1.51813e+06	1.29946e+06	486366	1.089e+06	1.4385e+06	1.14229e+06	946176	901975	789516		1.45541e+06	1.47887e+06	27.6	1.01166e+06	1.01759e+06	29.65	1.44	0.52	0.0206682	1.68	0.184282	1.59012	229.144	544.2	9.1	Up
M229T78	1.92375e+08	2.54658e+08	2.06305e+08	2.88305e+08	2.61387e+08	2.3739e+08	2.35932e+08	2.76735e+08	1.59273e+08	1.86053e+08	1.49302e+08	1.58255e+08	1.21749e+08	1.85949e+08	1.6574e+08	2.50037e+08		2.44136e+08	2.46024e+08	13.54	1.72045e+08	1.62507e+08	21.87	1.42	0.5	0.0018648	2.73	0.0601903	2.12226	229.011	77.7	1.3	Up
M229T81_2	664009	747727	866867	1.08216e+06	1.3097e+06	1.30534e+06	1.57492e+06	1.27824e+06	176808	163010	97171	514482	559131	183021	166390	599177		1.10362e+06	1.1802e+06	28.9	307399	179915	68.33	3.59	1.84	0.0001554	3.81	0.0365579	2.39177	229.067	80.5	1.3	Up
M230T114	186491	236196	297288	273681	150362	898447	199234	220954	1.22622e+06	162844	2.25332e+06	1.92836e+06	1.44905e+06	2.19988e+06	759336	1.12227e+06		307832	228575	79.01	1.38766e+06	1.33763e+06	52.37	0.22	-2.17	0.0104118	1.98	0.130233	1.97199	230.067	113.9	1.9	Down
M230T32_1	29933.7	31139.4	27920.1	30461.4	21239.2	23307.7	40335.2	32109.3	47984.7	24341.7	50801.8	47443.5	50907.2	46217.3	64940.4	36727.8		29555.8	30197.5	19.69	46170.6	47714.1	25.45	0.64	-0.64	0.00699301	2.16	0.1064	1.87949	229.916	31.5	0.5	Down
M231T108	641085	693774	523069	755717	676757	694829	926142	622079	2763.75	703134	117893	94958.9	2646.89	442302	470586	408400		691681	685265	16.86	280336	263146	92.68	2.47	1.3	0.004662	2.33	0.0886941	1.53876	230.998	108.1	1.8	Up
M231T125	243716	285000	121082	113965	246473	258224	341636	263679	105475	118984	130508	141216	105859	164869	173380	123580		234222	252348	33.49	132984	127044	19.06	1.76	0.82	0.0281274	1.55	0.216677	1.87993	231.135	125.4	2.1	Up
M231T327	559543	1.49185e+06	651000	484339	551589	597353	583883	579393	223097	199070	459961	245583	536691	555209	373632	475079		687369	581638	47.78	383540	416797	37.66	1.79	0.84	0.0010878	2.96	0.0513787	1.80884	231.044	327	5.4	Up
M231T532	419816	558619	559885	405787	299888	289260	376401	486907	263181	82454.1	385239	355838	79874.5	305925	272100	92662.3		424570	412802	24.66	229659	267641	55.01	1.85	0.89	0.00699301	2.16	0.1064	1.82598	231.16	531.8	8.9	Up
M231T94	246106	470862	352930	257246	197142	352986	163684	175113	111067	203946	218054	238423	188168	48941.3	155949	186197		277008	251676	38.61	168843	187182	36.82	1.64	0.71	0.0498834	1.3	0.285686	1.45428	231.099	93.6	1.6	Up
M232T285_1	1.89885e+07	1.88011e+07	2.67361e+07	2.70917e+07	1.76778e+07	2.61395e+07	2.52932e+07	2.73134e+07	1.58669e+07	2.36112e+07	1.86327e+07	1.96093e+07	1.92521e+07	1.84011e+07	1.35531e+07	1.16936e+07		2.35052e+07	2.57164e+07	17.94	1.75775e+07	1.85169e+07	21.38	1.34	0.42	0.0281274	1.55	0.216677	1.80421	231.931	285	4.8	Up
M232T304	3.79488e+06	4.79037e+06	5.31093e+06	6.19511e+06	4.71462e+06	3.137e+06	5.77729e+06	2.35644e+06	3.48989e+06	3.27436e+06	1.91451e+06	2.82548e+06	2.46986e+06	3.64184e+06	2.99494e+06	4.03295e+06		4.50958e+06	4.7525e+06	29.33	3.08048e+06	3.13465e+06	22.06	1.46	0.55	0.0379176	1.42	0.250052	1.58746	232.047	304.2	5.1	Up
M233T299	33778.9	25581.2	33507.1	18543.9	29436.1	19481.1	17096.4	16975.5	62114.8	21881.2	123313	68512.4	51708.8	24934	34023.9	44219.9		24300	22531.1	29.7	53838.6	47964.4	60.62	0.45	-1.15	0.0104118	1.98	0.130233	1.83862	233.056	298.8	5	Down
M233T323	161477	149494	109910	150196	122494	151055	178902	156675	16986.4	119322	18898.8	19314.7	17866.4	98348.5	94076.5	88701.7		147525	150626	14.78	59189.3	54008.2	75.39	2.49	1.32	0.0003108	3.51	0.040447	1.97073	233.012	322.7	5.4	Up
M233T340	999249	865638	245772	965299	845402	970689	1.00537e+06	1.3373e+06	452049	246034	432964	338448	610918	534189	576290	147609		904339	967994	33.79	417313	442507	39.08	2.17	1.12	0.00699301	2.16	0.1064	1.87789	233.013	339.6	5.7	Up
M233T374	1.4172e+06	1.02511e+06	1.45981e+06	822980	173543	1.15451e+06	813605	1.02336e+06	2.23416e+06	770445	3.02315e+06	1.62638e+06	2.45764e+06	1.5367e+06	1.34059e+06	1.62675e+06		986266	1.02424e+06	41.24	1.82698e+06	1.62657e+06	38.77	0.54	-0.89	0.014763	1.83	0.158002	1.51721	232.931	374.1	6.2	Down
M234T100	18185.4	14644.9	13765.5	18437.6	9964.02	21958	23247.4	21052.8	24316.8	16204.5	22232.8	28173.3	21742.5	21114.7	21136	23619.1		17657	18311.5	25.83	22317.5	21987.6	15.2	0.79	-0.34	0.0379176	1.42	0.250052	1.33775	234.081	100.1	1.7	Down
M234T154	7.41396e+06	7.14981e+06	8.03116e+06	1.0344e+07	1.13212e+07	9.63012e+06	1.65938e+07	1.73461e+07	3.5486e+06	1.50104e+07	4.23237e+06	2.81263e+06	5.15441e+06	8.98777e+06	1.02942e+07	6.66251e+06		1.09788e+07	9.98707e+06	36.18	7.08786e+06	5.90846e+06	58.3	1.55	0.63	0.0498834	1.3	0.285686	1.40025	234.044	153.6	2.6	Up
M234T448	552079	1.32893e+06	273360	941667	2.40698e+06	1.84192e+06	1.30603e+06	1.18173e+06	880307	178806	794910	412086	224805	521156	348871	347524		1.22909e+06	1.24388e+06	55.31	463558	380479	54.95	2.65	1.41	0.0104118	1.98	0.130233	1.8314	234.077	447.7	7.5	Up
M235T126	90776.7	53923.1	26858.5	48297.2	28496.3	49438.2	26198.8	51944.7	81949.5	73267	89366.1	123633	52480	31292.7	84696	108309		46991.7	48867.7	45.34	80624.1	83322.8	36.29	0.58	-0.78	0.0281274	1.55	0.216677	1.62116	234.928	126	2.1	Down
M235T324	518091	774489	602941	574338	496659	610892	563270	486139	27020.2	560496	52237.3	16428.6	47984.7	635360	517097	359117		578353	568804	15.9	276968	205677	97.12	2.09	1.06	0.0379176	1.42	0.250052	1.62056	235.073	323.9	5.4	Up
M235T357	260870	190371	299105	32948.2	156434	238281	234504	210289	279815	195854	368974	421303	330774	292116	261613	279038		202850	222396	40.02	303686	285965	22.79	0.67	-0.58	0.014763	1.83	0.158002	1.39234	235.072	356.9	5.9	Down
M236T114	157744	314224	247029	295947	250388	295213	323000	362905	129029	191934	178898	86728.2	162889	280250	252088	272814		280806	295580	22.23	194329	185416	35.84	1.45	0.53	0.0379176	1.42	0.250052	1.5304	236.06	113.8	1.9	Up
M236T190_1	117603	62436	184718	102908	180670	62264.9	109628	101691	162100	212719	343598	116242	141061	75635.6	203699	265572		115240	106268	40.27	190078	182900	45.21	0.61	-0.72	0.0498834	1.3	0.285686	1.60061	235.937	189.7	3.2	Down
M236T240	1.49533e+06	1.68933e+06	1.45843e+06	2.05996e+06	1.58759e+06	2.14343e+06	2.26132e+06	1.628e+06	712029	1.64123e+06	714264	768725	843339	1.06862e+06	1.20835e+06	964678		1.79042e+06	1.65866e+06	17.59	990155	904009	31.99	1.81	0.85	0.0018648	2.73	0.0601903	2.29287	236.005	240.1	4	Up
M236T290	471301	138243	204351	571623	675406	475212	468736	392393	137880	349641	153627	157787	131494	451376	164997	125115		424658	470018	42.01	208990	155707	58.39	2.03	1.02	0.0104118	1.98	0.130233	1.71446	236.06	289.7	4.8	Up
M236T302	729946	1.02296e+06	683628	774588	611625	882512	885362	873235	193140	684076	111453	156019	158534	454993	567017	429621		807983	823912	16.42	344357	311381	63.21	2.35	1.23	0.000621601	3.21	0.0444681	2.07427	236.06	302.3	5	Up
M236T327	3.01578e+06	3.25402e+06	3.20971e+06	4.17215e+06	2.22331e+06	3.52603e+06	3.90633e+06	4.17444e+06	2.09472e+06	2.2135e+06	2.65759e+06	2.97144e+06	2.42263e+06	2.86971e+06	2.62325e+06	2.14646e+06		3.43522e+06	3.39003e+06	19.21	2.49991e+06	2.52294e+06	13.32	1.37	0.46	0.0029526	2.53	0.0725285	2.07273	236.093	327.4	5.5	Up
M236T560	1.09885e+06	579865	1.62502e+06	1.08271e+06	558585	1.31144e+06	852152	1.15343e+06	657647	945238	343185	82437.2	538698	703417	951989	712015		1.03276e+06	1.09078e+06	34.96	616828	680532	47.66	1.67	0.74	0.0379176	1.42	0.250052	1.25202	236.078	560.2	9.3	Up
M237T153	77905	98760.4	113345	137591	93708.6	96479.1	68613.1	85843.3	54741.6	14579.5	17089.8	26696.2	52246.2	81870.3	82676.6	15575.6		96530.6	95093.8	22.23	43184.5	39471.2	66.69	2.24	1.16	0.0018648	2.73	0.0601903	2.06937	236.984	152.7	2.5	Up
M237T195	2.89247e+06	3.14077e+06	2.8229e+06	3.67492e+06	3.56245e+06	2.80418e+06	3.12102e+06	3.54455e+06	2.6602e+06	3.96017e+06	2.58176e+06	1.78951e+06	3.47407e+06	2.16938e+06	2.5428e+06	2.76029e+06		3.19541e+06	3.13089e+06	11.09	2.74227e+06	2.62098e+06	25.14	1.17	0.22	0.0498834	1.3	0.285686	1.13114	237.091	194.7	3.2	Up
M237T285	126860	290417	202868	110292	159245	128495	36541.1	120494	100547	14168.7	103646	170588	110598	77430.4	111636	13211.2		146901	127677	50.71	87728.1	102096	60.08	1.67	0.74	0.0498834	1.3	0.285686	1.24556	237.009	285.2	4.8	Up
M237T302	107458	181607	130557	144777	80213.4	204146	144042	154226	220379	878422	252957	124786	247629	162164	313039	350128		143378	144409	27.29	318688	250293	74.58	0.45	-1.15	0.0104118	1.98	0.130233	1.80436	237.037	302.4	5	Down
M237T372	1.17003e+06	1.45569e+06	1.2973e+06	1.17399e+06	917411	1.53724e+06	1.16614e+06	1.21193e+06	84783.3	893822	57207.3	18147.8	45694.2	1.06159e+06	1.0174e+06	1.05005e+06		1.24122e+06	1.19296e+06	15.46	528587	489303	97.03	2.35	1.23	0.0010878	2.96	0.0513787	1.66102	237.04	371.7	6.2	Up
M237T692	739457	608496	449423	280934	703095	457045	669046	922717	365171	104893	117912	157273	195991	164939	162305	357634		603777	638771	33.35	203265	163622	50.01	2.97	1.57	0.000621601	3.21	0.0444681	2.30294	237.15	692.3	11.5	Up
M237T92	177580	109769	204047	106799	88097.9	102092	97951.4	108116	142642	112550	197083	141805	171035	187104	166669	291605		124307	107458	33.96	176312	168852	30.58	0.71	-0.5	0.0379176	1.42	0.250052	1.63483	237.061	92.1	1.5	Down
M238T404	14727.9	10129.6	12679.6	9213.25	11922.1	9432.28	8511.21	6485.19	41003.3	10336	52438.6	50892.2	33853.9	10145.6	7964.28	15041.6		10387.6	9780.92	25.09	27709.4	24447.7	68.53	0.37	-1.42	0.0498834	1.3	0.285686	1.59435	238.098	404.3	6.7	Down
M238T560	39666.5	93603.1	84160.3	50013.1	66816.4	93644.1	89860.5	56898.8	134242	68744.5	100914	73466.3	114507	94735.9	74738.4	100853		71832.8	75488.3	29.7	95275.1	97794.4	23.65	0.75	-0.41	0.0379176	1.42	0.250052	1.35863	238.073	560	9.3	Down
M239T103	1.04228e+07	1.79423e+07	1.46202e+07	1.55563e+07	9.62203e+06	1.32735e+07	1.38365e+07	1.52245e+07	7.93513e+06	8.46795e+06	7.83936e+06	6.5532e+06	8.93309e+06	9.55243e+06	6.72593e+06	5.84449e+06		1.38123e+07	1.42283e+07	19.75	7.73145e+06	7.88724e+06	16.44	1.79	0.84	0.0001554	3.81	0.0365579	2.47737	239.114	102.8	1.7	Up
M239T252	150947	218649	129940	460330	410312	227300	109261	477614	537430	718031	737732	444617	489223	105732	517704	459502		273044	222975	55.89	501246	503464	38.89	0.54	-0.88	0.0379176	1.42	0.250052	1.43139	239.104	252.4	4.2	Down
M239T564	1.39547e+06	931269	1.16808e+06	1.07238e+06	1.19843e+06	1.38447e+06	1.60401e+06	1.96174e+06	1.23846e+06	867734	687825	888000	524762	1.21375e+06	1.03616e+06	718411		1.33948e+06	1.29145e+06	24.43	896888	877867	28.31	1.49	0.58	0.014763	1.83	0.158002	1.83552	239.128	563.8	9.4	Up
M239T70	1.7133e+06	1.30368e+06	1.54979e+06	974636	1.16874e+06	1.1342e+06	2.21668e+06	1.38048e+06	3.18994e+07	1.71284e+07	2.18186e+07	4.40694e+07	1.90095e+07	2.85244e+07	2.33514e+07	4.06364e+07		1.43019e+06	1.34208e+06	27.65	2.83047e+07	2.59379e+07	35.11	0.05	-4.31	0.0001554	3.81	0.0365579	2.77612	238.986	69.6	1.2	Down
M239T712	499927	56068.3	329194	152995	421065	311995	229091	1.56016e+06	2.46396e+06	1.81916e+06	3.98516e+06	1.58008e+06	2.06921e+06	389392	616892	1.29626e+06		445062	320594	106.12	1.77751e+06	1.69962e+06	63.71	0.25	-2	0.0029526	2.53	0.0725285	2.04023	239.165	711.8	11.9	Down
M240T110	1.51557e+06	1.74318e+06	1.27136e+06	1.90561e+06	1.80928e+06	1.8088e+06	2.34164e+06	2.02977e+06	494137	1.49442e+06	521931	287053	436509	1.1756e+06	1.20733e+06	1.06891e+06		1.80315e+06	1.80904e+06	17.8	835736	795419	53.84	2.16	1.11	0.0003108	3.51	0.040447	2.02658	240.074	109.5	1.8	Up
M240T285	222264	294324	284723	171519	313058	303944	265607	245699	344354	295695	424405	359288	270421	347459	374138	276547		262642	275165	18.19	336538	345906	15.67	0.78	-0.36	0.0206682	1.68	0.184282	1.71735	240.088	284.8	4.7	Down
M240T304	412834	458169	809370	307118	115649	522965	431563	1.94625e+06	671662	1.10218e+06	1.14578e+06	926902	1.30775e+06	567933	1.54073e+06	1.01231e+06		625489	444866	90.86	1.03441e+06	1.05725e+06	30.77	0.6	-0.73	0.0206682	1.68	0.184282	1.54941	240	303.5	5.1	Down
M240T349	30815.9	81852.3	89785.1	28763.7	39902.1	27241.1	29549.8	22793.5	237791	129010	103550	89030.5	31550.5	128325	132227	40415.7		43837.9	30182.9	60.3	111487	115938	57.71	0.39	-1.35	0.004662	2.33	0.0886941	1.78896	240.1	349.5	5.8	Down
M240T403	32457.2	18108.2	41052.1	64360.4	132606	23285.2	36736.9	25298.8	456069	166404	402231	107535	75003.1	73661.7	37518.4	24070.8		46738	34597	80.26	167812	91268.8	99.92	0.28	-1.84	0.0379176	1.42	0.250052	1.54399	240.124	403.1	6.7	Down
M240T760	1.60079e+06	640451	3.72296e+06	411909	3.32718e+06	661505	295835	354299	4.52829e+06	3.78684e+06	4.67415e+06	6.22463e+06	3.33266e+06	413515	1.29876e+06	4.94872e+06		1.37687e+06	650978	101.08	3.65095e+06	4.15757e+06	53.05	0.38	-1.41	0.014763	1.83	0.158002	1.66708	240.132	760	12.7	Down
M241T110	796114	812658	821973	428301	632600	480321	568969	362880	382096	71407.1	402461	542396	455685	485671	521915	304610		612977	600785	29.81	395780	429073	38.54	1.55	0.63	0.0498834	1.3	0.285686	1.39596	241.066	109.5	1.8	Up
M241T313	35375.5	6013.64	21301.6	4450.9	17189.2	25169.7	4250.65	23615.9	17400.7	67582.3	88267.8	26076.8	56885.5	12440.6	47338.2	24058.7		17170.9	19245.4	66.3	42506.3	36707.5	63.49	0.4	-1.31	0.0379176	1.42	0.250052	1.7194	241.029	313.4	5.2	Down
M241T346	198996	212118	227370	137378	227417	182017	204533	188446	228036	190357	229390	226322	191231	235559	255750	257338		197284	201764	14.83	226748	228713	11.12	0.87	-0.2	0.0379176	1.42	0.250052	1.45148	241.119	345.5	5.8	Down
M241T536	1.31522e+06	1.12818e+06	1.24914e+06	1.48642e+06	655068	1.34545e+06	1.11131e+06	1.0615e+06	779268	864302	679408	1.21168e+06	527135	1.22777e+06	946591	540355		1.16903e+06	1.18866e+06	21.46	847063	821785	32.09	1.38	0.46	0.0379176	1.42	0.250052	1.63552	240.994	536	8.9	Up
M241T596	358960	395445	549654	467724	265814	539754	445156	311297	240342	135025	224823	199992	177679	465360	273225	538414		416726	420300	24.66	281857	232583	50.83	1.48	0.56	0.0379176	1.42	0.250052	1.60029	240.99	596.3	9.9	Up
M241T614	2.08977e+06	2.36964e+06	1.25238e+06	1.63594e+06	3.0614e+06	2.18207e+06	2.82227e+06	3.01318e+06	603853	1.40589e+06	836497	521787	958952	2.1886e+06	1.86771e+06	1.12035e+06		2.30333e+06	2.27585e+06	28.24	1.18795e+06	1.03965e+06	50.07	1.94	0.96	0.00699301	2.16	0.1064	1.89306	241.038	613.8	10.2	Up
M241T653	739463	1.07014e+06	804662	1.07758e+06	555321	1.3132e+06	1.46526e+06	1.46697e+06	138260	618175	130870	74365.9	81533.2	538527	748010	670998		1.06158e+06	1.07386e+06	32.18	375092	338394	78.36	2.83	1.5	0.0018648	2.73	0.0601903	1.94192	241.087	652.9	10.9	Up
M241T69	1.06724e+06	1.28025e+07	8.62582e+06	1.27289e+07	3.62213e+06	7.49224e+06	3.02344e+06	1.21539e+07	917022	2.50195e+06	988670	973981	722033	3.89058e+06	3.5482e+06	2.62415e+06		7.68953e+06	8.05903e+06	61.11	2.02082e+06	1.74531e+06	63.4	3.81	1.93	0.00699301	2.16	0.1064	1.92015	241.002	69.2	1.2	Up
M241T749	195387	294085	284614	432966	141753	385007	143394	347544	69580.5	274503	234331	72550.4	147688	281849	120232	110015		278094	289350	39.42	163844	133960	53.32	1.7	0.76	0.0281274	1.55	0.216677	1.52212	240.974	749.2	12.5	Up
M241T762	1.0003e+07	7.16093e+06	1.15031e+07	7.92911e+06	1.31262e+07	8.39183e+06	9.05603e+06	1.35774e+07	2.02426e+07	3.08601e+07	2.41395e+07	1.28126e+07	1.88733e+07	7.63195e+06	2.98132e+07	1.66212e+07		1.00935e+07	9.52952e+06	23.86	2.01243e+07	1.95579e+07	39.78	0.5	-1	0.014763	1.83	0.158002	2.06823	241.217	762.1	12.7	Down
M243T149	453736	400803	389111	413024	344790	416208	502196	401690	859835	404461	905457	647936	418508	446237	444807	611130		415195	407357	11.18	592296	528684	33.87	0.7	-0.51	0.0206682	1.68	0.184282	1.61003	243.009	149.4	2.5	Down
M243T316	93937.2	112368	104851	82220.7	49235.5	109613	89442.2	68927.9	63284.3	47465.7	46986.7	48265.5	56748.8	59774.4	64049	57229.2		88824.5	91689.7	24.36	55475.5	56989	12.67	1.6	0.68	0.0029526	2.53	0.0725285	2.11997	243.054	315.9	5.3	Up
M243T422	595072	885196	981621	839269	715542	599947	973397	883025	66193.7	1.31201e+06	74541.5	21285.4	375350	329067	439734	374618		809134	861147	19.1	374100	351843	110.45	2.16	1.11	0.0104118	1.98	0.130233	1.63264	243.044	422.2	7	Up
M243T460	296986	659066	293827	249241	394374	476118	297998	354740	1.61757e+06	1.43868e+06	1.27417e+06	635545	530704	657975	872892	747808		377794	326369	35.52	971918	810350	42.47	0.39	-1.36	0.0010878	2.96	0.0513787	2.30347	243.124	460.1	7.7	Down
M243T597	342833	316914	694275	321476	487916	470397	294785	353223	1.4894e+06	351097	1.12235e+06	1.2529e+06	449719	831724	478141	901211		410227	348028	32.97	859567	866467	48.07	0.48	-1.07	0.014763	1.83	0.158002	1.76326	242.986	596.7	9.9	Down
M243T780	2.21005e+07	2.53126e+07	2.04836e+07	1.97368e+07	1.70469e+07	1.83421e+07	2.77893e+07	1.80456e+07	1.95124e+07	1.31779e+07	1.14646e+07	2.14324e+07	1.48461e+07	1.85522e+07	1.57196e+07	5.01772e+06		2.11072e+07	2.01102e+07	17.83	1.49654e+07	1.52829e+07	34.85	1.41	0.5	0.0281274	1.55	0.216677	1.6043	243.196	780.1	13	Up
M243T82	743464	588107	795027	818441	1.09228e+06	756900	828646	854394	1.10658e+06	1.22e+06	1.43835e+06	1.03257e+06	924057	1.03983e+06	933196	943471		809658	806734	17.39	1.07976e+06	1.0362e+06	16.31	0.75	-0.42	0.0029526	2.53	0.0725285	2.0098	243.099	82	1.4	Down
M244T122_1	756692	565957	864209	550314	572133	518604	457491	549623	951411	1.21602e+06	1.39661e+06	1.9502e+06	1.13911e+06	1.31152e+06	1.19247e+06	2.16646e+06		604378	558136	22.38	1.41548e+06	1.26377e+06	29.76	0.43	-1.23	0.0001554	3.81	0.0365579	2.50179	244.082	121.7	2	Down
M244T374	282798	502724	468059	960683	987588	1.29574e+06	638647	828058	295769	633102	455037	36028.2	91654.5	61183.8	522519	195506		745537	733352	44.66	286350	245637	79.64	2.6	1.38	0.0104118	1.98	0.130233	1.68206	244.029	373.7	6.2	Up
M244T683	430619	1.611e+06	690150	823853	519557	1.52531e+06	1.07947e+06	825094	626920	388103	640967	663097	793840	473090	508804	455753		938131	824473	46.6	568822	567862	23.62	1.65	0.72	0.0379176	1.42	0.250052	1.62222	243.984	682.8	11.4	Up
M244T780	3.20063e+06	2.01056e+06	3.06294e+06	2.53825e+06	2.37274e+06	2.4279e+06	1.98573e+06	2.39863e+06	1.153e+06	1.82882e+06	1.37029e+06	1.21283e+06	2.15589e+06	2.07765e+06	1.99349e+06	973053		2.49967e+06	2.41327e+06	17.54	1.59563e+06	1.59955e+06	29.39	1.57	0.65	0.0029526	2.53	0.0725285	1.98724	244.2	780.1	13	Up
M245T100	1.48626e+06	1.80293e+06	1.87139e+06	1.96682e+06	1.59304e+06	1.65536e+06	1.67591e+06	2.38356e+06	234451	1.52469e+06	128591	134605	128693	1.29836e+06	1.11443e+06	1.45261e+06		1804408	1.73942e+06	15.55	752052	674439	86.23	2.4	1.26	0.0003108	3.51	0.040447	1.82318	245.114	99.6	1.7	Up
M245T107	1.74925e+06	1.5768e+06	1.48318e+06	1.41998e+06	1.20035e+06	1.57195e+06	5.492e+06	2.38113e+06	211595	927813	518824	291962	470466	2.03598e+06	2.08522e+06	1.02412e+06		2.10933e+06	1.57438e+06	66.83	945746	723319	78.6	2.23	1.16	0.0379176	1.42	0.250052	1.67295	245.097	107.4	1.8	Up
M245T157	751511	594700	738046	1.06067e+06	459672	533271	593306	552605	466472	324971	465091	613551	325653	648007	468557	435567		660473	594003	28.7	468484	465781	24.91	1.41	0.5	0.0498834	1.3	0.285686	1.74227	245.066	157.3	2.6	Up
M245T287	72649.8	63941.2	38317.7	91641.9	107268	42701.1	41740.1	25605.7	32939.1	26076.5	23665.3	38863.1	27935.7	30056.7	37592.5	19388.1		60483.2	53321.2	47.16	29564.6	28996.2	22.72	2.05	1.03	0.00699301	2.16	0.1064	1.90467	245.023	287	4.8	Up
M245T407	62366.9	107058	51318.7	91868.2	318380	153949	133240	176351	78134.1	42819.7	93557.3	36944.8	32304.9	32808.2	30270.5	33741.8		136817	120149	62.14	47572.7	35343.3	51.03	2.88	1.52	0.0029526	2.53	0.0725285	2.03717	245.093	407.1	6.8	Up
M245T579	208549	298032	375359	107831	219553	194748	119786	185379	272868	490870	263493	314839	425471	265429	198116	322711		213655	201648	41.3	319225	293854	29.86	0.67	-0.58	0.0379176	1.42	0.250052	1.61757	245.118	578.8	9.6	Down
M245T80	2.75932e+06	2.20666e+06	2.23513e+06	3.05446e+06	2.91988e+06	3.00206e+06	2.89875e+06	3.05399e+06	2.07513e+06	2.18212e+06	2.39992e+06	2.42654e+06	2.15711e+06	2.24507e+06	2.28967e+06	1.87164e+06		2.76628e+06	2.90932e+06	12.66	2.2059e+06	2.21359e+06	8.16	1.25	0.33	0.0104118	1.98	0.130233	2.11355	245.027	80.2	1.3	Up
M245T800	1.66617e+06	1.68826e+06	3.54076e+06	6.50303e+06	2.70021e+06	4.10733e+06	2.16889e+06	4.16342e+06	1.70603e+06	2.17974e+06	1.2886e+06	606028	926258	1.61792e+06	1.04202e+06	1.38589e+06		3.31726e+06	3.12048e+06	49.16	1.34406e+06	1.33725e+06	36.88	2.47	1.3	0.0029526	2.53	0.0725285	2.0597	245.202	799.9	13.3	Up
M245T83_1	5.68108e+06	3.60718e+06	2.76872e+06	1.84027e+06	2.78399e+06	3.22914e+06	3.13638e+06	2.96122e+06	4.37833e+06	7.71116e+06	6.57138e+06	2.79111e+06	4.00729e+06	2.84164e+06	6.32309e+06	3.72631e+06		3.251e+06	3.0488e+06	34.04	4.79379e+06	4.19281e+06	38.43	0.68	-0.56	0.0498834	1.3	0.285686	1.58902	244.876	83.3	1.4	Down
M246T125	2.49041e+06	2.36068e+06	1.70333e+06	2.06917e+06	4.81114e+06	1.92347e+06	4.7199e+06	2.70416e+06	390759	2.73721e+06	1.7048e+06	309140	319227	1.0063e+06	2.64355e+06	760405		2.84778e+06	2.42555e+06	43.04	1.23392e+06	883351	81.89	2.31	1.21	0.0379176	1.42	0.250052	1.70945	246.044	124.7	2.1	Up
M246T368	152122	287846	182553	136247	129947	125885	145930	119757	27955.8	112185	43259.6	53251.3	62969.4	90882.2	75152.1	193731		160036	141089	34.52	82423.3	69060.7	63.42	1.94	0.96	0.00699301	2.16	0.1064	1.84887	245.539	367.8	6.1	Up
M246T375	10668.4	13228.2	78260.8	13669.7	23788.5	13752.7	2444.85	5494.98	336851	11552.9	250120	196843	217738	27613.2	71721.1	80253.3		20163.5	13449	120.6	149087	138548	78.9	0.14	-2.89	0.00699301	2.16	0.1064	1.97965	246.044	374.9	6.2	Down
M246T547	3.99045e+06	1.09555e+07	1.25487e+07	8.95854e+06	4.87341e+06	6.02682e+06	1.05371e+07	7.89975e+06	11834	12526	15823.6	12045.2	13075.3	10815.6	12320.7	8076.44		8.22379e+06	8.42915e+06	37.38	12064.6	12182.9	17.98	681.65	9.41	0.0001554	3.81	0.0365579	2.82902	245.989	546.9	9.1	Up
M246T99	283712	391171	1.69914e+06	1.36505e+06	314722	383614	1.52917e+06	1.76601e+06	2.35703e+06	2.13676e+06	3.37915e+06	1.31805e+06	1.64406e+06	2.30428e+06	2.36056e+06	1.74662e+06		966573	878108	70.09	2.15581e+06	2.22052e+06	28.98	0.45	-1.16	0.00699301	2.16	0.1064	1.87405	246.098	99.2	1.7	Down
M247T148	169238	127439	166235	139796	87746.5	160228	164134	179354	174054	158601	228814	239904	193868	178980	157465	185408		149272	162181	20.07	189637	182194	16.01	0.79	-0.35	0.0379176	1.42	0.250052	1.52927	247.04	148.3	2.5	Down
M247T372	279606	314301	181233	276758	306910	304449	299441	285870	308450	505520	348884	213502	323407	317254	343916	359305		281071	292656	15.13	340030	333662	23.75	0.83	-0.27	0.0104118	1.98	0.130233	1.28098	247.083	372.3	6.2	Down
M247T390	349934	385148	309973	125603	467965	444539	432961	426124	834322	800629	1.1032e+06	658464	578100	450292	394439	1.06546e+06		367781	405636	30.17	735614	729547	35.84	0.5	-1	0.0029526	2.53	0.0725285	2.00078	247.021	389.9	6.5	Down
M247T674	433477	282614	244070	312768	116886	221191	311711	300847	175748	118318	146775	103867	102206	353929	176431	173437		277945	291730	32.58	168839	160106	48.06	1.65	0.72	0.0379176	1.42	0.250052	1.65767	246.983	673.5	11.2	Up
M247T694	163100	194374	95428.3	76269.4	98899.1	223375	205774	190177	74776.6	78248.8	141079	32607.9	227154	65074.2	84843.8	35857.7		155925	176638	36.76	92455.2	76512.7	69.15	1.69	0.75	0.0498834	1.3	0.285686	1.4553	247.134	693.6	11.6	Up
M247T88	842235	1.35653e+06	2.21647e+06	2.07315e+06	2.23294e+06	387649	2.05265e+06	1.48462e+06	3.58946e+06	2.09897e+06	3.40606e+06	2.99853e+06	639689	2.83484e+06	1.88186e+06	3.03586e+06		1.58078e+06	1.76864e+06	43.59	2.56066e+06	2.91669e+06	38.01	0.62	-0.7	0.0498834	1.3	0.285686	1.18148	247.049	87.5	1.5	Down
M248T386	70016.6	50761.1	61687.9	46348.8	33384.2	63098.1	44242.4	64383.6	21518.8	40246.3	38495	23480.6	35210.4	47961.1	55305.8	45659.8		54240.4	56224.5	23.06	38484.7	39370.6	30.29	1.41	0.5	0.0379176	1.42	0.250052	1.47987	248.04	386.4	6.4	Up
M248T496	58026.5	87171.5	63750.6	54166.5	107314	52679.6	85713.9	61113.5	30123.9	120767	18647.7	26468.7	22321	30564.6	51213.8	69473.9		71242	62432.1	27.74	46197.5	30344.3	74.75	1.54	0.62	0.0498834	1.3	0.285686	1.46104	248.093	496.4	8.3	Up
M249T378	78096.1	48087.8	64044.3	35530.8	86596.8	59785.7	47892.2	80772.5	188736	141806	201884	142214	120422	45305.9	143633	136495		62600.8	61915	29.06	140062	142010	33.69	0.45	-1.16	0.00699301	2.16	0.1064	2.16833	249.081	378.2	6.3	Down
M249T764	593353	371326	562595	373284	1.61276e+06	259264	481992	456136	3.47662e+06	1.91545e+06	4.14852e+06	443460	2.09596e+06	409399	2.9777e+06	2.66798e+06		588839	469064	72.64	2.26689e+06	2.38197e+06	59.18	0.26	-1.94	0.0206682	1.68	0.184282	2.05496	249.149	764.2	12.7	Down
M249T97	1.04608e+06	1.78519e+06	1.34366e+06	948074	975063	1.43859e+06	1.1774e+06	1.26433e+06	196253	1.0265e+06	264729	345296	354200	791909	689546	1.05607e+06		1.2473e+06	1.22087e+06	22.36	590563	521873	58.47	2.11	1.08	0.0029526	2.53	0.0725285	1.97689	249.079	96.5	1.6	Up
M250T84_1	888288	599545	4237.82	697806	1262.07	2609.19	4140.39	6606.41	1.35883e+06	992689	1.53896e+06	2.48909e+06	1.44801e+06	1.18643e+06	879421	1.90141e+06		275562	5422.12	139.07	1.47435e+06	1.40342e+06	35.33	0.19	-2.42	0.0003108	3.51	0.040447	2.05479	249.953	84	1.4	Down
M250T97	926181	909302	880020	1.31627e+06	1.42316e+06	752558	927670	750905	850652	774376	749524	806595	713750	823529	704449	769394		985758	917741	25.26	774034	771885	6.64	1.27	0.35	0.0206682	1.68	0.184282	1.60061	250.05	97.4	1.6	Up
M251T104	1.10831e+06	876689	750951	742175	580891	624820	718118	742898	922555	746301	1.21356e+06	1.04146e+06	888061	990975	1.16004e+06	776465		768107	742537	21.29	967427	956765	17.36	0.79	-0.33	0.014763	1.83	0.158002	1.60583	251.042	104	1.7	Down
M251T293_2	573790	638980	475655	397557	371208	600262	472583	365487	14611.2	326804	11022.1	2227	13268.5	291123	353261	269209		486940	474119	21.95	160191	141910	101.22	3.04	1.6	0.0001554	3.81	0.0365579	1.7349	251.104	293.4	4.9	Up
M251T544	957144	420254	1.40583e+06	1.07129e+06	84715.8	1.47495e+06	602069	526745	331047	109550	257626	1.03233e+06	183370	384008	44180.3	261971		817874	779606	60.04	325510	259799	94.17	2.51	1.33	0.0281274	1.55	0.216677	1.54673	251.129	543.9	9.1	Up
M251T90	490921	168071	429710	281386	248699	311915	149084	487710	531392	428964	1.4525e+06	557622	681074	400656	343636	395291		320937	296650	42.18	598892	480178	60.42	0.54	-0.9	0.0379176	1.42	0.250052	1.67423	251.096	90	1.5	Down
M252T337	19819	9610.31	25490.9	11524	15810.9	8184.09	7664.62	8288.57	33712.3	16854.3	34597.2	37274.2	26063.8	14437	18372.1	26574.9		13299.1	10567.2	49	25985.7	26319.3	33.69	0.51	-0.97	0.00699301	2.16	0.1064	1.9927	252.082	337.1	5.6	Down
M252T722	53099.7	47163.1	249917	24054.8	24878.9	50078.8	26623.4	60203.9	177982	48952.8	128546	98345.7	511681	307414	150248	85754.7		67002.4	48620.9	112.29	188616	139397	80.63	0.36	-1.49	0.014763	1.83	0.158002	1.75277	252.168	722	12	Down
M253T69	3.77106e+07	1.36439e+07	1.92668e+07	1.54944e+07	2.36918e+07	2.73772e+07	1.95794e+07	2.80147e+07	1.55625e+07	8.67266e+07	6.9978e+07	4.28117e+07	3.35369e+07	3.41613e+07	8.4818e+07	3.77547e+07		2.30974e+07	2.16356e+07	33.96	5.06687e+07	4.02832e+07	52.04	0.46	-1.13	0.0104118	1.98	0.130233	1.87055	253.002	69.1	1.2	Down
M253T73	2.28808e+07	1.98782e+07	2.71859e+07	1.1594e+07	833288	2.01914e+07	1.34636e+07	1.56862e+07	2.33108e+06	1.01289e+06	9.88271e+06	1.27717e+07	1.30423e+07	2.40306e+06	1.70716e+06	6.89217e+06		1.64642e+07	1.77822e+07	49.2	6.25539e+06	4.64761e+06	81.18	2.63	1.4	0.0206682	1.68	0.184282	1.39263	252.942	73.1	1.2	Up
M254T151	4.51188e+06	7.08032e+06	4.58856e+06	9.21173e+06	5.5583e+06	6.98631e+06	9.16197e+06	1.00136e+07	511950	3.99168e+06	830496	251349	472578	3.94297e+06	4.27522e+06	3.43823e+06		7.13908e+06	7.03331e+06	30.22	2.21431e+06	2.13436e+06	82.91	3.22	1.69	0.0001554	3.81	0.0365579	1.96565	254.08	151.4	2.5	Up
M255T334_2	36716.7	48081.9	41626	34791.2	43541.6	32481.2	28647.9	37071.3	42525.6	50996.9	41215.3	50587.2	44355.9	33423.2	43583.3	57202.3		37869.7	36894	16.58	45486.2	43969.6	16.01	0.83	-0.26	0.0498834	1.3	0.285686	1.51086	255.109	333.9	5.6	Down
M255T401	286033	282579	155120	317557	228662	91409.7	383439	173740	300821	2.62876e+06	862793	333520	280059	363498	736692	543933		239818	255621	39.97	756260	453716	104	0.32	-1.66	0.0104118	1.98	0.130233	1.87219	255.124	400.6	6.7	Down
M255T446	409052	1.7648e+06	647672	806912	3.86363e+06	2.02742e+06	1.57236e+06	1.80043e+06	970696	682708	1.15126e+06	347876	642719	347744	111953	344853		1.61153e+06	1.66858e+06	67.68	574977	495298	61.51	2.8	1.49	0.014763	1.83	0.158002	1.71317	255.088	446.3	7.4	Up
M255T527	457864	433099	395012	533956	481202	455218	517150	398370	40234.9	479935	11835.5	3218.57	2307.01	274889	281750	127885		458984	456541	11.03	152757	84059.8	115.19	3	1.59	0.0029526	2.53	0.0725285	1.74523	255.084	526.9	8.8	Up
M255T717	536999	532650	239622	471108	176248	316060	240522	505897	392064	802149	727822	850306	564541	444375	609177	1.0134e+06		377388	393584	39.66	675480	668500	31.35	0.56	-0.84	0.0104118	1.98	0.130233	1.82943	255.069	717.4	12	Down
M255T740	192232	473804	911234	747533	487383	531929	594577	634914	1.72236e+06	765343	1.27955e+06	1.4723e+06	1.74822e+06	911993	721432	685688		571701	563253	36.99	1.16336e+06	1.09577e+06	38.56	0.49	-1.02	0.0029526	2.53	0.0725285	1.78135	255.16	740.3	12.3	Down
M255T91	3.2885e+06	4.59344e+06	2.6431e+06	3.26745e+06	3.56634e+06	3.94609e+06	3.3441e+06	2.96041e+06	1.77554e+06	1.96477e+06	2.96375e+06	2.92053e+06	1.14058e+06	3.01147e+06	2.55538e+06	2.78699e+06		3.45118e+06	3.3163e+06	17.41	2.38988e+06	2.67119e+06	28.74	1.44	0.53	0.004662	2.33	0.0886941	1.80487	255.065	90.8	1.5	Up
M256T384	714394	1.16398e+06	491335	526453	1.38298e+06	1.28597e+06	1.10945e+06	1.1052e+06	490932	391975	439149	63792.2	487982	57137.4	354329	267698		972469	1.10732e+06	35.56	319124	373152	54.98	3.05	1.61	0.0001554	3.81	0.0365579	1.89061	255.822	384.4	6.4	Up
M256T497	116154	84280.1	118791	29032.3	11931.7	68132.9	64698.2	13729.8	157202	222196	111348	135255	213556	143915	151677	54222.9		63343.7	66415.5	67	148671	147796	36.15	0.43	-1.23	0.00699301	2.16	0.1064	1.80093	256.155	496.5	8.3	Down
M256T659	2.5144e+06	6.34005e+06	5.21411e+06	2.64406e+06	2.21909e+06	4.85034e+06	3.37618e+06	4.25412e+06	525908	2.14466e+06	306998	217693	507267	2.62399e+06	1.51171e+06	2.41719e+06		3.92654e+06	3.81515e+06	37.65	1.28193e+06	1.01881e+06	78.79	3.06	1.61	0.0010878	2.96	0.0513787	1.98726	255.822	659	11	Up
M256T712	95892.3	10818.4	63505.6	29520.4	81240.9	60199.4	44247.9	157161	276432	384994	414701	371362	368378	116497	119029	306288		67823.2	61852.5	66.64	294710	337333	39.93	0.23	-2.12	0.000621601	3.21	0.0444681	2.27262	256.191	712	11.9	Down
M256T719	199621	2.20361e+07	4.98037e+06	8.21416e+06	8.1834e+06	3.23018e+06	8.15261e+06	7.7202e+06	78219.7	619498	3.82365e+06	264384	3.15354e+06	6.06143e+06	2.45433e+06	853922		7.83959e+06	7.9364e+06	82.06	2.16362e+06	1.65413e+06	97.37	3.62	1.86	0.0206682	1.68	0.184282	1.42498	255.822	718.9	12	Up
M257T340	28405.1	29132.6	33901.7	24229.3	41245.9	29518.7	24987.3	25946.3	83814.6	50526.6	79001.3	59531.7	51900.1	7097.75	42437.2	45858.5		29670.9	28768.8	18.86	52521	51213.3	45.19	0.56	-0.82	0.0104118	1.98	0.130233	1.12975	257.04	340.4	5.7	Down
M257T445	432367	265835	388405	486134	361192	496414	606521	621409	203573	368518	157328	22270	113667	279066	442261	220920		457285	459250	26.5	225950	212247	60.14	2.02	1.02	0.00699301	2.16	0.1064	1.54984	257.14	444.7	7.4	Up
M257T485	387060	567618	526407	192037	62809.5	217828	441852	459833	71458.1	18837.9	11918.5	90828.8	49532.3	66302	57823.3	82769.5		356931	414456	50.21	56183.8	62062.7	50.54	6.35	2.67	0.0018648	2.73	0.0601903	2.32785	257.14	484.9	8.1	Up
M257T501	11391.2	2324.41	5358.6	54845.1	180931	4175.86	1049.4	7540.6	94574	198725	216328	238090	325619	7059.6	3071.83	185938		33452	6449.6	185.76	158676	192332	71.92	0.21	-2.25	0.0281274	1.55	0.216677	1.58473	257.048	501	8.3	Down
M257T540	103789	716315	127803	216347	104054	251111	121051	145870	585785	535244	203470	191507	991496	217984	785406	683156		223292	136837	92.4	524256	560515	56.91	0.43	-1.23	0.0281274	1.55	0.216677	1.69026	257.139	539.6	9	Down
M257T801	3.96056e+06	4.3193e+06	3.3903e+06	3.16976e+06	395923	4.13448e+06	2.4338e+06	5.90215e+06	309259	426579	406585	1.6682e+06	1.4051e+06	927787	1.49164e+06	2.6744e+06		3.46328e+06	3.67543e+06	46.22	1.16369e+06	1.16644e+06	69.7	2.98	1.57	0.0104118	1.98	0.130233	1.76988	257.176	800.7	13.3	Up
M257T86	4.98829e+07	5.19719e+07	4.07896e+07	3.728e+07	5.24986e+07	5.11917e+07	4.58812e+07	4.50605e+07	2.40024e+07	4.9192e+07	2.42265e+07	3.43789e+07	2.79703e+07	4.46626e+07	4.34959e+07	3.76081e+07		4.68195e+07	4.7882e+07	11.94	3.56921e+07	3.59935e+07	27.14	1.31	0.39	0.014763	1.83	0.158002	1.65475	257.075	85.8	1.4	Up
M257T99	219023	166816	207352	147649	370361	176176	176522	245647	468875	922517	544433	264062	393191	198627	669559	382992		213693	191937	33.08	480532	431033	48.41	0.44	-1.17	0.0029526	2.53	0.0725285	2.15026	257.016	98.5	1.6	Down
M258T103	1.80102e+07	1.31698e+07	2.37628e+07	4.04596e+06	1.3171e+07	2.47261e+07	3.21323e+07	2.94608e+07	3.26031e+07	1.90129e+07	3.47431e+07	2.53578e+07	3.20108e+07	1.90061e+07	3.35252e+07	3.92323e+07		1.98099e+07	2.08865e+07	47.69	2.94364e+07	3.23069e+07	25.41	0.67	-0.57	0.0281274	1.55	0.216677	1.42297	258.074	103.4	1.7	Down
M258T122	4.98654e+06	2.40344e+06	3.7181e+06	2.00325e+06	2.93191e+06	2.1469e+06	3.44344e+06	1.67565e+06	4.0814e+06	9.84511e+06	6.87328e+06	6.51935e+06	4.11693e+06	3.60207e+06	6.98265e+06	2.57476e+06		2.91365e+06	2.66768e+06	37.67	5.57444e+06	5.31814e+06	42.91	0.52	-0.94	0.0104118	1.98	0.130233	1.9186	258.134	122.4	2	Down
M258T345	70684.3	34611.4	112484	16321.2	48315.3	38275.5	45958.7	27697.3	47712.1	59305.1	74745	138571	137423	113232	33672.2	92235.1		49293.4	42117.1	61.12	87112	83490	45.96	0.57	-0.82	0.0498834	1.3	0.285686	1.47278	257.819	344.6	5.7	Down
M258T45	275807	49857.5	357135	184748	84114.6	203653	191880	100463	358515	1.94497e+06	353789	2.5523e+06	342645	408408	124504	213805		180957	188314	56.71	787367	356152	116.96	0.23	-2.12	0.014763	1.83	0.158002	1.57258	257.817	44.6	0.7	Down
M258T451	404276	441952	345173	390503	581667	494027	362118	1.36045e+06	364812	579859	317926	351880	293228	297495	281569	211733		547521	423114	61.61	337313	307711	32.2	1.62	0.7	0.014763	1.83	0.158002	1.46783	258.044	451.2	7.5	Up
M258T651	761977	593434	655332	549526	655169	737054	747387	609529	888889	895225	939128	717003	646108	668434	738459	930413		663676	655251	11.82	802957	813674	15.25	0.83	-0.27	0.0498834	1.3	0.285686	1.80572	258.179	650.5	10.8	Down
M259T103	5.26271e+06	156464	2.21277e+06	1.81623e+06	250964	2.19014e+06	191171	1.44375e+06	2.75099e+06	1.87713e+06	2.27082e+06	2.75462e+06	3.61758e+06	3.01508e+06	3.47169e+06	2.71289e+06		1.69053e+06	1.62999e+06	100.07	2.80885e+06	2.7528e+06	20.45	0.6	-0.73	0.0206682	1.68	0.184282	1.50132	259.078	103.4	1.7	Down
M259T33	69076.6	75339.4	77610.1	72375.9	71162.3	77696.6	84229.2	89072	90581.6	88460.1	86432.8	94045.8	91680.3	88291.3	69658.8	77997.3		77070.3	76474.8	8.77	85893.5	88375.7	9.44	0.9	-0.16	0.0379176	1.42	0.250052	1.36828	258.819	32.7	0.5	Down
M259T356	595856	284102	599927	258414	308097	286083	216462	249040	579042	306879	669278	774184	620683	357042	409945	565686		349748	285093	44.49	535342	572364	30.35	0.65	-0.61	0.0281274	1.55	0.216677	1.64021	259.039	356.2	5.9	Down
M259T724	520866	1.43437e+06	1.00686e+06	702365	4.80874e+06	2.11024e+06	1.53889e+06	1.08416e+06	16107.1	510393	55445.5	113776	19447.8	52674.6	26804.7	38605		1.65081e+06	1.25926e+06	83.04	104157	45639.8	160.39	15.85	3.99	0.0001554	3.81	0.0365579	2.49573	258.981	724.2	12.1	Up
M259T738	482725	351484	594631	694920	211218	592607	590022	645460	1.42611e+06	375112	935256	2.44899e+06	944943	721443	730345	1.03656e+06		520383	591314	31.43	1.07735e+06	940099	58.52	0.48	-1.05	0.004662	2.33	0.0886941	1.54662	258.981	737.5	12.3	Down
M260T103	8.56613e+06	1.71832e+07	1.03686e+07	1.31515e+07	1.61117e+07	1.57142e+07	1.07599e+07	1.43507e+07	6.77939e+06	9.44818e+06	9.32367e+06	8.46429e+06	5.9961e+06	8.84684e+06	6.75702e+06	8.54687e+06		1.32757e+07	1.37511e+07	23.37	8.02029e+06	8.50558e+06	16.41	1.66	0.73	0.0010878	2.96	0.0513787	2.25986	260.072	103.4	1.7	Up
M260T111	96943.1	120810	136287	116674	122479	119756	71303.6	75320.1	362995	133890	359173	187189	319083	148065	88337.6	204333		107447	118215	22.03	225383	195761	47.62	0.48	-1.07	0.00699301	2.16	0.1064	1.86369	260.125	111.2	1.9	Down
M260T120	865328	794105	1.06661e+06	857453	1.02176e+06	848430	798533	873595	936340	893293	930132	896477	1.03721e+06	1.10302e+06	1.20399e+06	1.07264e+06		890727	861391	11.21	1.00914e+06	986773	11.19	0.88	-0.18	0.014763	1.83	0.158002	1.54731	260.021	120.1	2	Down
M260T33	338334	424679	416250	269290	321576	353528	372276	345192	394419	600583	485568	453147	431124	546271	556524	537778		355140	349360	14.18	500677	511673	14.16	0.71	-0.5	0.000621601	3.21	0.0444681	2.27998	259.816	32.6	0.5	Down
M261T299	1.33673e+06	1.96448e+06	1.78795e+06	1.52674e+06	992616	1.40665e+06	1.71336e+06	1.89907e+06	17453	942604	18670.4	19128.4	67819.5	1.45345e+06	1.08321e+06	1.55925e+06		1.57845e+06	1.62005e+06	20.71	645198	505212	106.11	2.45	1.29	0.0104118	1.98	0.130233	1.68233	261.055	299.5	5	Up
M261T441	814366	729040	1.55909e+06	671207	8.37318e+06	588645	457985	307977	288381	1.92724e+06	6238.66	6958.38	185093	389745	379749	969.539		1.68769e+06	700124	161.57	398047	236737	160.59	4.24	2.08	0.014763	1.83	0.158002	1.54719	261.096	440.8	7.3	Up
M261T638	295050	310731	249951	278993	367498	274516	247888	182697	244924	177491	217010	238805	210353	135463	157023	245414		275916	276754	19.43	203310	213681	20.71	1.36	0.44	0.0029526	2.53	0.0725285	1.7007	261.149	637.5	10.6	Up
M261T82	127940	62682.4	207475	169029	49612.1	240242	153473	181941	2.25525e+06	150437	1.37529e+06	1.52087e+06	1.40375e+06	584494	456138	759817		149049	161251	44.66	1.06326e+06	1.06755e+06	65.23	0.14	-2.83	0.0029526	2.53	0.0725285	2.2	261.016	81.9	1.4	Down
M263T217	1.37819e+06	127087	140328	117182	113390	86658.7	766097	62365.7	1.37546e+06	69252.6	1.62981e+06	2.05161e+06	841055	859886	1.32712e+06	516384		348913	122134	136.43	1.08382e+06	1.0935e+06	58.76	0.32	-1.64	0.0498834	1.3	0.285686	1.66271	263.097	216.7	3.6	Down
M263T404	20339.1	27611.9	28073.5	23251.9	27726.6	18914.1	22804	39188.3	83784.3	109885	159929	248129	167225	38586.4	61233.5	28101.6		25988.7	25431.9	24.5	112109	96834.6	67.16	0.23	-2.11	0.000621601	3.21	0.0444681	2.14583	263.042	403.6	6.7	Down
M264T762	89929.3	23499.9	531934	91073.1	41021.3	181344	42060.6	56366.1	593123	56572.6	596909	663257	300793	197496	97411.6	384938		132153	73147.7	127.8	361312	342865	65.66	0.37	-1.45	0.014763	1.83	0.158002	1.56754	264.168	761.6	12.7	Down
M264T90	2.43458e+06	4.12287e+06	2.57635e+06	4.69872e+06	2.3415e+06	5.0666e+06	2.43325e+06	4.96861e+06	5.04964e+06	4.53052e+06	2.56788e+06	5.80205e+06	4.73975e+06	6.51374e+06	6.01882e+06	4.8051e+06		3.58031e+06	3.34961e+06	34.78	5.00344e+06	4.92737e+06	24.15	0.72	-0.48	0.0498834	1.3	0.285686	1.26545	264.109	90.3	1.5	Down
M265T111	72557.7	14462.9	17742.8	11995.6	55045.7	17944.7	9375.21	12412	157935	54140.9	253391	306638	138353	12189.3	14377.8	78734.7		26442.1	16102.8	89.64	126970	108544	85.67	0.21	-2.26	0.0498834	1.3	0.285686	1.69132	265.094	111.5	1.9	Down
M265T121	1.46075e+06	1.20229e+06	1.58695e+06	4.26996e+06	2.09908e+06	3.11771e+06	4.0958e+06	4.43835e+06	1.52105e+06	3.14592e+06	660121	183275	647836	816672	1.72232e+06	183637		2.78386e+06	2.6084e+06	48.82	1.1101e+06	738397	89.49	2.51	1.33	0.0206682	1.68	0.184282	1.72347	264.525	121.4	2	Up
M265T540	351994	325305	279964	302298	67478	109488	364087	268422	207374	176272	110926	97565.2	79797.6	60699.3	198228	82020.3		258630	291131	42.74	126610	104246	45.99	2.04	1.03	0.0281274	1.55	0.216677	1.50754	265.144	539.5	9	Up
M265T707	216662	324519	432425	1.1822e+06	744990	748686	921070	840518	298002	377468	567270	388455	149626	312885	320450	613974		676384	746838	48.31	378516	348959	39.66	1.79	0.84	0.0498834	1.3	0.285686	1.41982	264.974	707.1	11.8	Up
M265T71	117148	103191	89687.6	100457	383828	119828	111303	150674	276990	159050	216973	403225	193141	131453	142445	129722		147015	114226	66.24	206625	176096	45.49	0.71	-0.49	0.0206682	1.68	0.184282	1.18146	264.954	70.8	1.2	Down
M265T92	867830	1.13287e+06	848842	1.42636e+06	513488	1.23907e+06	734819	1.02364e+06	1.03108e+06	51896.9	81159.5	63724.6	106804	535386	734576	715461		973364	945733	30.05	415011	321095	93.24	2.35	1.23	0.0104118	1.98	0.130233	1.79916	265.083	91.5	1.5	Up
M266T126	576062	186478	526975	687585	494540	686807	481421	551420	210513	464806	482345	351067	150989	463930	490563	449630		523911	539197	30.04	382980	456780	34.71	1.37	0.45	0.014763	1.83	0.158002	1.02568	265.988	126.1	2.1	Up
M266T327_1	1.63209e+06	414713	1.32087e+06	604556	1.55862e+06	96802.3	673571	806804	2.6962e+06	1.86533e+06	4.2997e+06	1.3929e+06	1.6676e+06	718616	2.24327e+06	2.21762e+06		888504	740188	62.72	2.13766e+06	2.04148e+06	49.59	0.42	-1.27	0.004662	2.33	0.0886941	1.84237	266.089	326.7	5.4	Down
M266T374	1.16773e+06	1.21227e+06	845732	903135	755294	1.44376e+06	816604	739720	1.07442e+06	405318	646867	988876	560167	632083	662409	450682		985531	874433	26.09	677602	639475	35.15	1.45	0.54	0.0206682	1.68	0.184282	1.74681	266.02	374.3	6.2	Up
M266T471	63341.6	47442.4	62923.8	45488.5	52732.7	61735.6	39236.4	25678.3	23765.3	33694.2	13571.6	22313.5	22548.8	44680.3	51784	52288.3		49822.4	50087.5	26.54	33080.8	28729.8	44.95	1.51	0.59	0.0281274	1.55	0.216677	1.44191	266.105	470.9	7.8	Up
M266T622	38903.9	65340.4	101132	71576.2	19836.4	67064.6	58455.9	33354.1	150883	37245	87970.6	81293.7	100541	141638	105558	97231.4		56958	61898.2	45.01	100295	98886.3	35.34	0.57	-0.82	0.0206682	1.68	0.184282	1.49886	266.052	621.9	10.4	Down
M267T153	1.06032e+06	130256	229141	680198	906179	169392	1.59843e+06	422182	544056	1.0647e+06	1.46082e+06	1.28993e+06	1.23182e+06	1.02107e+06	1.60767e+06	1.01028e+06		649513	551190	79.46	1.15379e+06	1.14826e+06	28.23	0.56	-0.83	0.0379176	1.42	0.250052	1.63926	267.189	153.4	2.6	Down
M267T329	341978	572234	187415	653433	314413	357967	376688	285643	360119	700273	617644	1.20957e+06	187880	487725	871736	873232		386221	349972	39.59	663522	658959	48.94	0.58	-0.78	0.0498834	1.3	0.285686	1.22443	267.048	329.4	5.5	Down
M267T335	257306	272488	267341	109470	151282	162696	154185	120998	158235	3936.18	112338	179093	87970.3	29645	133308	13251.2		186971	158440	36.17	89722	100154	75.25	2.08	1.06	0.0379176	1.42	0.250052	1.57722	267.093	334.9	5.6	Up
M268T374	118657	90309.1	268696	181080	112685	147776	119423	102094	535839	133377	761040	378488	191472	200208	151678	442390		142590	119040	40.88	349312	289348	63.71	0.41	-1.29	0.00699301	2.16	0.1064	1.76756	268.017	374.1	6.2	Down
M268T829	3.62643e+06	3.9925e+06	1.53889e+06	1.44175e+06	3.32515e+06	1.72773e+06	7.86473e+06	1.85566e+06	8.12022e+07	1.22442e+07	5.30796e+07	5.84257e+07	2.39003e+07	4.64136e+06	6.92931e+06	8.38481e+06		3.1716e+06	2.5904e+06	67.84	3.11009e+07	1.80723e+07	93.72	0.1	-3.29	0.000621601	3.21	0.0444681	2.17983	268.236	829.2	13.8	Down
M268T91_1	700036	672340	1.0962e+06	569465	354183	391015	535135	1.2786e+06	1.02509e+06	991821	1.03468e+06	959541	1.48508e+06	1.14767e+06	704985	1.44814e+06		699621	620902	46.84	1.09962e+06	1.02988e+06	23.54	0.64	-0.65	0.0281274	1.55	0.216677	1.73146	268.075	91.5	1.5	Down
M268T97_2	397426	408495	268508	374846	382869	358140	248303	352719	1.11634e+07	592694	6.65481e+06	4.23225e+06	6.4826e+06	2.82107e+06	3.29945e+06	5.94028e+06		348913	366493	16.93	5.14832e+06	5.08627e+06	61.98	0.07	-3.88	0.0001554	3.81	0.0365579	2.52816	268.049	96.8	1.6	Down
M269T165	1.71526e+07	1.66891e+07	3.58441e+07	1.22035e+07	1.70901e+07	2.11244e+07	3.45606e+07	4.31366e+07	1.1522e+08	2.70088e+07	1.55324e+08	7.7061e+07	7.63042e+07	2.62206e+07	2.40606e+07	2.98163e+07		2.47251e+07	1.91385e+07	46.1	6.63769e+07	5.30603e+07	73.8	0.37	-1.42	0.0379176	1.42	0.250052	1.64695	269.078	165	2.8	Down
M269T432	184082	231916	207814	310744	103859	344125	361224	186294	110314	142464	247361	173060	96197.8	123876	123788	140683		241257	219865	37.13	144718	132279	32.8	1.67	0.74	0.0281274	1.55	0.216677	1.72057	269.082	432.4	7.2	Up
M269T485	779070	817422	714105	920550	902346	929150	1.11831e+06	811433	267372	809557	244674	333743	183956	640436	685668	607971		874048	859884	14.17	471672	470857	50.81	1.85	0.89	0.000621601	3.21	0.0444681	1.94738	269.139	485.3	8.1	Up
M269T73	613567	559947	986007	1.02462e+06	670028	569776	686131	683754	533283	336292	662791	656701	486448	669690	563390	652494		724229	676891	24.91	570136	607942	20.53	1.27	0.35	0.0498834	1.3	0.285686	1.42703	268.919	73.2	1.2	Up
M270T120	4.48315e+06	1.30834e+06	3.99031e+06	3.85641e+06	1.40751e+06	1.33735e+06	1.44389e+06	1.67539e+06	1.47341e+06	4.02398e+06	6.22843e+06	4.70276e+06	4.03991e+06	4.50705e+06	4.56697e+06	4.19207e+06		2.43779e+06	1.55964e+06	57.44	4.21682e+06	4.34956e+06	31.16	0.58	-0.79	0.00699301	2.16	0.1064	1.64186	270.029	119.9	2	Down
M270T126	51645.6	38481.2	57664.9	40064.1	125169	53305.3	38488.5	89948.4	333924	136805	532904	104799	322569	33383.8	57121.5	130655		61845.8	52475.4	49.5	206520	133730	83.77	0.3	-1.74	0.0379176	1.42	0.250052	1.69785	270.01	126.3	2.1	Down
M270T487	852407	1.60042e+06	964832	989114	363379	836458	677306	887957	115998	374167	107727	120286	114016	622790	264998	380945		896484	870182	38.79	262616	192642	71.09	3.41	1.77	0.0010878	2.96	0.0513787	2.24749	270.035	486.5	8.1	Up
M271T356	139505	95862.8	209490	59930.1	99505.3	105168	141183	100716	240408	136752	233579	420911	234101	185415	135223	235279		118920	102942	37.65	227709	233840	39.36	0.52	-0.94	0.00699301	2.16	0.1064	1.9443	271.093	356	5.9	Down
M271T550	8041.91	46797.6	9165.87	12081.2	33758.3	60454.3	24127	14301.8	41054.4	95996.2	72077	2081.76	82227.5	28009.6	69046.7	165471		26091	19214.4	74.15	69495.6	70561.9	71.24	0.38	-1.41	0.0498834	1.3	0.285686	1.13414	271.101	550.5	9.2	Down
M271T77	1.77518e+06	1.51942e+06	1.71345e+06	1.51535e+06	1.21151e+06	2.2668e+06	1.41615e+06	1.90709e+06	3.6251e+06	1.00339e+06	5.64567e+06	4.50641e+06	4.07136e+06	1.60479e+06	2.98612e+06	2.30423e+06		1.66562e+06	1.61644e+06	19.61	3.21838e+06	3.30561e+06	48.2	0.52	-0.95	0.0379176	1.42	0.250052	1.55306	271.033	77	1.3	Down
M272T103	695342	787398	606277	626817	514375	662796	867022	618875	1.04543e+06	993910	1.28619e+06	1.04446e+06	1.13127e+06	1.02602e+06	1.34748e+06	1.06332e+06		672363	644806	16.49	1.11726e+06	1.05437e+06	11.65	0.6	-0.73	0.0001554	3.81	0.0365579	2.54304	272.026	102.6	1.7	Down
M272T393	204925	172851	118572	182395	75338.6	75276.4	126886	32796.4	44183	35112.1	73867.8	146611	83123.3	65907.5	26677.8	57876.2		123630	122729	48.76	66669.8	61891.9	56.38	1.85	0.89	0.0498834	1.3	0.285686	1.45666	272.024	392.7	6.5	Up
M273T154	3.09603e+06	2.87956e+06	2.23886e+06	3.07944e+06	2.70692e+06	3.05061e+06	3.64055e+06	3.15108e+06	36587.5	2.75377e+06	86674.8	56397	109790	2.35981e+06	2.6776e+06	1.69792e+06		2.98038e+06	3.06503e+06	13.47	1.22232e+06	903856	103.84	2.44	1.29	0.0018648	2.73	0.0601903	1.69645	273.073	153.5	2.6	Up
M273T190	2.75838e+06	2.80491e+06	478606	2.70748e+06	2.35911e+07	546609	517280	675582	139049	1.67621e+06	284963	178878	472597	217868	383579	496286		4.25999e+06	1.69153e+06	185.14	481178	334271	104.04	8.85	3.15	0.0029526	2.53	0.0725285	1.59262	273.145	190	3.2	Up
M273T31	124369	121600	122949	136677	121999	117516	122954	122167	102668	93729.6	120503	122888	99162.1	122810	115732	89910.2		123779	122558	4.51	108425	109200	12.54	1.14	0.19	0.014763	1.83	0.158002	1.84468	272.882	30.8	0.5	Up
M273T338	2.37768e+06	1.49832e+06	2.44449e+06	3.40487e+06	2.20686e+06	2.11082e+06	2.93297e+06	2.94736e+06	2.33011e+06	627999	1.35771e+06	1.09276e+06	1.35908e+06	1.6671e+06	2.09479e+06	1.06328e+06		2.49042e+06	2.41108e+06	23.83	1.4491e+06	1.3584e+06	38.75	1.72	0.78	0.0029526	2.53	0.0725285	1.93931	273.091	337.9	5.6	Up
M273T401	108425	146944	97781.7	216035	207389	270369	255598	218947	162596	94898.9	184030	69146.6	64263.1	87376	54238	47617.6		190186	211712	34.19	95520.8	78261.3	53.19	1.99	0.99	0.004662	2.33	0.0886941	1.93159	273.091	401.4	6.7	Up
M273T82	2.08081e+06	3.11601e+06	1.86734e+06	1.93454e+06	528466	2.26966e+06	1.28039e+06	1.8354e+06	7.50159e+06	3.68009e+06	6.26866e+06	4.50423e+06	5.2387e+06	4.80123e+06	2.03208e+06	4.04157e+06		1.86408e+06	1.90094e+06	40.09	4.75852e+06	4.65273e+06	34.82	0.39	-1.35	0.0010878	2.96	0.0513787	2.05413	272.794	82.4	1.4	Down
M273T86_1	2.6622e+07	6.08769e+07	3.23283e+07	2.18423e+07	5.25808e+07	6.46471e+07	5.66413e+07	4.60764e+07	3.73502e+07	7.54827e+06	9.51777e+06	6.06615e+06	6.14503e+06	5.57275e+06	6.81805e+06	9.01285e+06		4.52019e+07	4.93286e+07	36.13	1.10039e+07	7.18316e+06	97.59	4.11	2.04	0.0010878	2.96	0.0513787	2.39764	273	86.1	1.4	Up
M274T100	2.71862e+06	3.24626e+06	3.26636e+06	3.35281e+06	2.96823e+06	2.81713e+06	2.86073e+06	2.88871e+06	3.75034e+06	4.038e+06	4.35029e+06	3.74188e+06	3.40384e+06	3.64995e+06	3.55431e+06	3.74024e+06		3.01486e+06	2.92847e+06	7.93	3.77861e+06	3.74106e+06	7.78	0.8	-0.33	0.0001554	3.81	0.0365579	2.38783	274.149	99.5	1.7	Down
M274T372	2.05856e+06	1.50706e+06	1.86436e+06	2.01637e+06	1.4033e+06	830145	1.37228e+06	1.37425e+06	4.71148e+06	1.53614e+06	6.25061e+06	4.80016e+06	5.35901e+06	2.05107e+06	2.93912e+06	1.53248e+06		1.55329e+06	1.45518e+06	26.42	3.64751e+06	3.8253e+06	50.92	0.43	-1.23	0.00699301	2.16	0.1064	1.86671	274.039	372.1	6.2	Down
M274T724	205584	410040	169080	549034	920431	326039	255711	503558	3874.25	138895	13395.7	23677.2	4696.6	12441.1	6420.25	9238.7		417435	368040	58.6	26579.8	10839.9	172.4	15.7	3.97	0.0001554	3.81	0.0365579	2.54278	274.13	724	12.1	Up
M274T74	8.21817e+06	1.04579e+07	8.45386e+06	3.59273e+06	7.13214e+07	3.91742e+07	1.39005e+07	1.30514e+07	4.58982e+06	7.78671e+06	5.23835e+06	5.71964e+06	1.43243e+06	1.88135e+07	4.60743e+06	5.43645e+06		2.10213e+07	1.17547e+07	109.53	6.70304e+06	5.3374e+06	77.56	3.14	1.65	0.0379176	1.42	0.250052	1.47022	274.024	74	1.2	Up
M274T89	1.37573e+06	1.76118e+06	1.74778e+06	1.97666e+06	1.62694e+06	2.08136e+06	1.76568e+06	1.96141e+06	1.20885e+06	1.56896e+06	1.07575e+06	1.02522e+06	1.04132e+06	1.31751e+06	1.21318e+06	1.40544e+06		1.78709e+06	1.76343e+06	12.52	1.23203e+06	1.21101e+06	15.5	1.45	0.54	0.000621601	3.21	0.0444681	2.33942	274.09	89.4	1.5	Up
M275T100	47060.3	37921.9	36430.2	44732.3	50499	34812.2	42741.8	39705.8	24727.9	20118.1	24034.9	38508.7	24450.9	38368.1	39958.8	18535.6		41737.9	41223.8	13.12	28587.9	24589.4	30.98	1.46	0.55	0.0206682	1.68	0.184282	2.0082	275.151	99.8	1.7	Up
M275T729	173992	205882	243892	216781	61370.8	209759	205831	212647	313471	117979	326106	178874	259408	332929	375765	555153		191269	207820	29.19	307461	319788	42.9	0.62	-0.68	0.0498834	1.3	0.285686	1.29209	275.142	729.1	12.2	Down
M276T115	170468	26974.8	236659	45471.5	24969.8	219469	137184	170476	200270	216528	242738	426205	315648	226312	179929	191149		128959	153826	66.51	249847	221420	33.12	0.52	-0.95	0.014763	1.83	0.158002	1.63779	276.078	114.9	1.9	Down
M276T156	864826	1.26735e+06	910928	1.17579e+06	1.26997e+06	1.35483e+06	1.08787e+06	1.57636e+06	1.50248e+06	1.09561e+06	857892	955869	723729	706927	613679	747707		1.18849e+06	1.22157e+06	19.68	900488	802800	31.96	1.32	0.4	0.0379176	1.42	0.250052	1.60172	276.017	156.2	2.6	Up
M276T295	128963	71057.1	95913	81013.2	75667.7	74630.4	83118.6	126355	167017	119989	314107	240139	150205	84427.8	89207.1	131067		92089.8	82065.9	25.2	162020	140636	48.62	0.57	-0.82	0.0104118	1.98	0.130233	1.69899	276.109	295.2	4.9	Down
M276T421	109198	128880	83548.6	118010	106221	120339	159530	107700	17010.8	111693	20957.8	14751	19914.2	58772.9	66981.6	45249.9		116678	113604	18.73	44416.4	33103.8	76.23	2.63	1.39	0.0018648	2.73	0.0601903	2.10376	276.107	421.1	7	Up
M276T490	54538	46046.3	46664.1	32263.7	46793.8	66362.7	6054.87	23494.4	58272.9	87784.3	119800	62209.5	51139.7	58728	90176.1	28016.3		40277.2	46355.2	47.08	69515.8	60468.8	40.85	0.58	-0.79	0.0281274	1.55	0.216677	1.41403	276.182	490.1	8.2	Down
M276T85	2.91823e+07	3.64796e+07	3.02882e+07	4.69113e+07	3.51047e+07	3.98007e+07	3.80051e+07	4.72833e+07	9.48498e+06	3.78962e+07	8.31563e+06	5.76283e+06	8.05669e+06	1.6382e+07	1.58614e+07	2.22885e+07		3.78819e+07	3.72423e+07	17.75	1.5506e+07	1.26732e+07	68.36	2.44	1.29	0.0018648	2.73	0.0601903	2.15688	275.956	85	1.4	Up
M277T115	136969	160307	121627	125129	145993	148673	157154	155109	183395	205442	238055	172319	179016	160373	192005	250175		143870	147333	10.15	197598	187700	16.08	0.73	-0.46	0.0001554	3.81	0.0365579	2.29273	277.086	114.9	1.9	Down
M277T74	1.39752e+06	1.52233e+06	1.48568e+06	1.28998e+06	1.98295e+06	1.70997e+06	1.89118e+06	1.70589e+06	2.67979e+06	2.90681e+06	2.84812e+06	2.25543e+06	2.28142e+06	1.89438e+06	1.87508e+06	2.84926e+06		1.62319e+06	1.61411e+06	14.85	2.44879e+06	2.4806e+06	17.5	0.66	-0.59	0.0010878	2.96	0.0513787	2.3148	277.024	73.8	1.2	Down
M277T96	992409	895824	814013	1.08691e+06	1.06657e+06	1.0379e+06	1.00351e+06	1.24378e+06	108655	1.21026e+06	109092	98054.3	67535.1	743650	756179	722007		1.01761e+06	1.02071e+06	12.64	476930	415549	91.36	2.13	1.09	0.00699301	2.16	0.1064	1.73036	277.058	96.2	1.6	Up
M278T227	288410	304396	283254	209296	135517	275371	317732	283782	389654	338951	373193	420958	412461	425294	447390	240773		262220	283518	23.01	381084	401058	17.33	0.69	-0.54	0.004662	2.33	0.0886941	1.78067	278.034	227.5	3.8	Down
M278T31_2	142893	85878.5	115966	94394.9	38981.3	166026	94711.6	115403	79431.4	25010.4	44311	97279.1	86084.2	65484.1	56796.5	46642.6		106782	105057	35.93	62629.9	61140.3	38.56	1.7	0.77	0.0281274	1.55	0.216677	1.6644	277.828	30.8	0.5	Up
M278T408_2	3772.38	1813.58	3001.67	2136.52	11618.4	3687.04	10846.1	3193.03	18364.8	4313.21	29030	17201	4114.27	2274.38	18619.3	14627.8		5008.59	3440.03	77.99	13568.1	15914.4	68.49	0.37	-1.44	0.0206682	1.68	0.184282	1.54002	278.07	408.4	6.8	Down
M278T719	12621	1.74717e+06	257158	420148	793014	755768	680451	625506	4945.29	39246.4	287701	16741.3	253782	450675	567420	53834		661479	652978	77.7	209293	153808	103.2	3.16	1.66	0.0379176	1.42	0.250052	1.32605	278.148	718.7	12	Up
M278T86	3.70947e+06	6.28144e+06	3.77524e+06	3.05979e+06	4.55305e+06	2.9844e+06	2.69836e+06	3.93516e+06	1.95976e+06	5.57729e+06	1.46563e+06	1.83406e+06	2.38323e+06	2.39538e+06	2.5998e+06	4.18763e+06		3.87461e+06	3.74236e+06	29.48	2.80035e+06	2.3893e+06	49.47	1.38	0.47	0.0498834	1.3	0.285686	1.30265	278.041	85.8	1.4	Up
M279T158	914638	640955	1.17412e+06	878360	1.07505e+06	989171	1.01145e+06	971346	775961	905066	776946	823473	1.01935e+06	562201	847564	483103		956886	980259	16.44	774208	800210	22.62	1.24	0.31	0.0379176	1.42	0.250052	1.31678	279.038	157.7	2.6	Up
M279T303	16985.5	14288.2	29973.1	12799	16010.5	21230.7	105121	70986.5	129950	7597.04	231921	163236	21928.8	149296	157589	134677		35924.3	19108.1	94.26	124524	141987	60	0.29	-1.79	0.0281274	1.55	0.216677	1.42961	279.037	303.1	5.1	Down
M279T31	71495.8	57994.8	53514.8	53323.4	32476	87296.1	51954.5	52132.9	45285	30617	46008.2	52235.8	48975.2	44018	43388.3	44997.3		57523.5	53419.1	27.9	44440.6	45141.1	14.16	1.29	0.37	0.014763	1.83	0.158002	1.42636	278.836	30.7	0.5	Up
M279T371	188661	3249.27	162463	32566	264042	11117.3	22886.8	94568	424639	623763	789970	153172	102635	10066.6	452204	404838		97444.2	63567	99.95	370161	414738	72.19	0.26	-1.93	0.0498834	1.3	0.285686	1.57348	279.101	371.4	6.2	Down
M279T55	142894	300609	250052	144159	172088	190498	308642	176868	70390.5	18191.3	117119	146583	152236	352706	23825.4	81300.4		210726	183683	31.73	120294	99209.4	88.58	1.75	0.81	0.0379176	1.42	0.250052	1.67558	278.852	55.1	0.9	Up
M279T638	184861	430000	671335	452310	326197	432494	488718	271806	756481	389708	688782	587131	332123	491822	635799	1.05444e+06		407215	431247	36.42	617036	611465	37.04	0.66	-0.6	0.0498834	1.3	0.285686	1.40135	279.16	637.6	10.6	Down
M279T82	1.05215e+06	1.02604e+06	1.03047e+06	987534	816816	1.01052e+06	983785	945510	1.35865e+06	912886	1.59498e+06	1.21525e+06	1.31139e+06	1.09816e+06	1.02422e+06	1.09255e+06		981604	999027	7.57	1.20101e+06	1.1567e+06	18.05	0.82	-0.29	0.0206682	1.68	0.184282	1.66665	279.091	81.8	1.4	Down
M279T83	852967	958110	1.28913e+06	1.7948e+06	1.41116e+06	1.735e+06	907085	2.18866e+06	2.54505e+06	1.71286e+06	2.52086e+06	1.96682e+06	3.30995e+06	2.92304e+06	1.86793e+06	2.06003e+06		1.39211e+06	1.35014e+06	34.76	2.36332e+06	2.29044e+06	23.64	0.59	-0.76	0.004662	2.33	0.0886941	1.91589	278.829	82.9	1.4	Down
M280T125_1	335399	339333	320908	143934	332742	203958	309232	367095	512838	293538	607750	551602	404285	288346	426379	377311		294075	326825	26.4	432756	415332	26.97	0.68	-0.56	0.0379176	1.42	0.250052	1.68676	280.013	125.4	2.1	Down
M280T167	5.49531e+06	4.67047e+06	3.75222e+06	6.46866e+06	4.2123e+06	3.52641e+06	5.01378e+06	3.60826e+06	1.94905e+06	2.7845e+06	3.69261e+06	2.12596e+06	2.17685e+06	4.86315e+06	4.82013e+06	2.8525e+06		4.59343e+06	4.44139e+06	22.5	3.15809e+06	2.8185e+06	37.23	1.45	0.54	0.0379176	1.42	0.250052	1.65311	280.043	166.9	2.8	Up
M280T31	11964.2	18181.5	16264.6	16304.3	14458.5	16944.5	17110.2	16990.5	34221.6	22140.3	27005.7	25444.3	27883.7	14766.7	14576.1	19483.3		16027.3	16624.4	12.18	23190.2	23792.3	29.31	0.69	-0.53	0.0379176	1.42	0.250052	1.66981	279.767	31.1	0.5	Down
M280T67	141037	207656	152903	189442	129742	183686	164586	148965	86575.5	157668	121726	134651	111971	117568	138667	158141		164752	158745	16.2	128371	128188	18.78	1.28	0.36	0.0206682	1.68	0.184282	1.73848	279.509	66.8	1.1	Up
M280T782	3.06658e+07	2.34163e+07	2.61431e+07	2.87684e+07	3.45478e+07	1.58473e+07	2.40636e+07	2.14656e+07	1.85213e+08	4.4325e+07	1.49489e+08	1.2758e+08	1.7978e+08	3.10174e+07	3.81129e+07	5.73678e+07		2.56147e+07	2.51034e+07	22.64	1.01611e+08	9.24737e+07	64.77	0.25	-1.99	0.0003108	3.51	0.040447	2.13587	280.236	781.6	13	Down
M280T810	1.32035e+07	1.45424e+07	1.86663e+07	1.84323e+07	3.46845e+07	2.0981e+07	8.16727e+06	1.82254e+07	3.2985e+06	5.45207e+06	1.45583e+07	2.72673e+07	2.54985e+06	1.15479e+07	1.89605e+06	4.89512e+06		1.83628e+07	1.83288e+07	42.11	8.93314e+06	5.1736e+06	96.95	2.06	1.04	0.0281274	1.55	0.216677	1.81669	280.236	809.9	13.5	Up
M280T838	8.2365e+07	7.73898e+07	7.06698e+07	1.86293e+07	8.82418e+07	5.99482e+07	1.61397e+08	7.94534e+07	1.71024e+07	2.54022e+07	2.92867e+07	1.07217e+08	5.09896e+07	4.22798e+07	5.6636e+07	2.21568e+07		7.97618e+07	7.84216e+07	49.61	4.38838e+07	3.57833e+07	66.55	1.82	0.86	0.0498834	1.3	0.285686	1.40648	280.236	837.5	14	Up
M280T93	710412	1.26868e+06	672760	519503	659951	644699	475839	451999	785618	970994	968421	705554	763120	570000	866801	1.87706e+06		675480	652325	38.3	938446	826209	42.85	0.72	-0.47	0.0379176	1.42	0.250052	1.38516	280.17	93.5	1.6	Down
M281T104	2.76121e+06	2.46031e+06	2.87695e+06	941060	1.99787e+06	1.69061e+06	2.11031e+06	1.69154e+06	2.09075e+06	772962	965335	1.29118e+06	1.48205e+06	1.40572e+06	1.74129e+06	988508		2.06623e+06	2.05409e+06	30.88	1.34222e+06	1348453	32.56	1.54	0.62	0.0379176	1.42	0.250052	1.52203	281.08	103.8	1.7	Up
M281T167	1.71088e+07	3.48528e+07	1.83609e+07	1.93013e+07	2.37991e+07	2.06736e+07	2.34565e+07	2.61896e+07	7.2311e+06	2.00634e+07	1.0081e+07	7.67484e+06	7.71014e+06	1.44049e+07	1.1988e+07	1.80204e+07		2.29678e+07	2.2065e+07	24.78	1.21467e+07	1.10345e+07	40.62	1.89	0.92	0.0018648	2.73	0.0601903	2.08266	281.036	166.7	2.8	Up
M281T421	24335.2	57231.6	39302.9	15353.9	25510.5	30451.2	13541.2	47063	48118.5	42072.4	58686.2	44458.1	65666.7	36581.8	34272.8	68222.4		31598.7	27980.8	48.39	49759.9	46288.3	26.06	0.64	-0.66	0.0281274	1.55	0.216677	1.65054	281.059	420.5	7	Down
M281T616	134231	79806.8	230211	122199	85393	81503.6	146781	212330	370467	241562	105855	152375	283530	312944	117372	306173		136557	128215	42.61	236285	262546	42.08	0.58	-0.79	0.0379176	1.42	0.250052	1.50869	281.139	616.3	10.3	Down
M281T801	4.26538e+06	1.32384e+07	2.22256e+06	4.47244e+06	6.68823e+07	1.61918e+07	1.82916e+07	1.81347e+07	6.22039e+06	1.7408e+07	1.43966e+07	465243	3.49467e+06	536381	2.1239e+06	499242		1.79624e+07	1.47151e+07	115.94	5.64306e+06	2.80929e+06	118.25	3.18	1.67	0.0498834	1.3	0.285686	1.37997	281.255	800.6	13.3	Up
M282T305	222287	165551	166633	223111	154810	183727	169996	167385	238437	272528	225372	188772	273799	188862	290657	229793		181687	168691	14.59	238528	234115	16.09	0.76	-0.39	0.0018648	2.73	0.0601903	2.04082	282.098	304.6	5.1	Down
M282T91	238570	225582	261333	236595	266755	186479	219024	214231	295713	311406	340735	258187	254050	256502	306470	275673		231071	231089	11.24	287342	285693	10.94	0.8	-0.31	0.004662	2.33	0.0886941	2.18547	282.108	90.5	1.5	Down
M283T175	4.45056e+06	4.95211e+06	4.37903e+06	4.32957e+06	4.75805e+06	5.02192e+06	5.48812e+06	4.89307e+06	6.94257e+06	5.00821e+06	6.68541e+06	7.58912e+06	5.10456e+06	5.30751e+06	4.57209e+06	5.60757e+06		4.78405e+06	4.82556e+06	8.19	5.85213e+06	5.45754e+06	18.46	0.82	-0.29	0.014763	1.83	0.158002	1.57491	283.088	175.3	2.9	Down
M283T698	89145	80144.3	141108	80400.9	61527.8	67720.4	53636.9	78338.6	245568	130970	244916	359915	293556	73620.9	71388.3	118577		81502.7	79241.4	32.76	192314	187943	56.23	0.42	-1.24	0.0379176	1.42	0.250052	1.7505	283.11	697.5	11.6	Down
M283T81	1.82553e+06	1.55817e+06	2.04443e+06	1.13722e+06	219166	1.8376e+06	1.41349e+06	1.76785e+06	6.13362e+06	4.84399e+06	6.68434e+06	7.86014e+06	4.576e+06	3.66907e+06	5.24321e+06	4.34524e+06		1.47543e+06	1.66301e+06	39.41	5.41945e+06	5.0436e+06	25.49	0.27	-1.88	0.0001554	3.81	0.0365579	2.27856	283.06	80.8	1.3	Down
M284T269	237544	195689	267156	242660	213091	121230	66986.7	33799	458407	235926	440022	297085	166221	223146	396271	428800		172269	204390	50.65	330735	346678	34.46	0.52	-0.94	0.0281274	1.55	0.216677	1.70475	284.089	268.8	4.5	Down
M284T568	701429	448557	494308	467513	790104	930648	446337	604921	1.01465e+06	1.55404e+06	1.33089e+06	1.07376e+06	817637	593322	840377	875167		610477	549615	29.7	1.01248e+06	944908	30.34	0.6	-0.73	0.00699301	2.16	0.1064	1.99442	284.186	568.5	9.5	Down
M284T765	901810	376897	507820	262979	542734	68305.2	347002	337799	1.81633e+06	1.48264e+06	2.24144e+06	439034	561964	307630	1.53006e+06	1.49105e+06		418168	361950	58.38	1.23377e+06	1.48685e+06	57.41	0.34	-1.56	0.0206682	1.68	0.184282	1.90775	284.223	765.1	12.8	Down
M284T94	2.06439e+06	1.36264e+06	3.79447e+06	1.87717e+06	472103	3.20423e+06	1.21776e+06	1.46585e+06	596529	36220.7	61719.5	2.57707e+06	532075	1.36102e+06	37587.2	841052		1932327	1.67151e+06	56.32	755408	564302	114.99	2.56	1.36	0.0281274	1.55	0.216677	1.77667	284.116	94.4	1.6	Up
M285T104_1	91054.9	76159.5	390306	83098.3	444658	72006.2	71338.8	75631.1	1.14535e+06	132897	501100	395250	500135	350757	457816	90516		163032	79628.9	96.82	446728	426533	72.35	0.36	-1.45	0.0104118	1.98	0.130233	1.6856	285.095	103.8	1.7	Down
M285T160	1.20865e+06	1.70753e+06	1.44582e+06	1.85209e+06	1.82067e+06	1.74122e+06	1.6887e+06	2.1814e+06	1.29203e+06	1.48905e+06	808086	758154	938299	344042	752209	320027		1.70576e+06	1.72438e+06	16.83	837737	783120	48.74	2.04	1.03	0.0010878	2.96	0.0513787	2.05695	285.145	159.7	2.7	Up
M285T382	96887.1	85171.6	104450	129457	64674.6	96467.9	87059.5	59193.9	269532	74933.7	203411	188378	105746	158739	78807.5	142891		90420.3	91763.7	24.64	152805	150815	43.79	0.59	-0.76	0.0498834	1.3	0.285686	1.49292	285.076	382.4	6.4	Down
M285T540	29169.1	160560	190576	246134	35980.1	34444.1	242461	132040	47375.9	505893	266523	191882	327065	205593	205901	582367		133920	146300	68.41	291575	236212	60.34	0.46	-1.12	0.0281274	1.55	0.216677	1.3507	285.089	539.5	9	Down
M285T569	77543.7	80694.5	82710.3	55961.4	121559	105085	121858	179485	341343	195640	200277	96642.4	89348.3	198666	103976	212609		103112	93897.8	37.25	179813	197153	46.55	0.57	-0.8	0.0379176	1.42	0.250052	1.60339	285.189	568.5	9.5	Down
M285T601	70460.6	65905.9	24521.9	90220.4	115687	60967.1	66062.3	92853.4	96492.7	92612.5	128579	114711	114653	86128.5	123526	75059.8		73334.9	68261.4	36.85	103970	105573	18.38	0.71	-0.5	0.0281274	1.55	0.216677	1.46413	285.15	601	10	Down
M285T662	5735.46	6505.44	8649.63	1195.14	788.421	3912.27	1988.05	3204.23	187547	1110.37	132794	137271	158090	50105.3	9318.7	69509.6		3997.33	3558.25	69.34	93218.3	101152	75.37	0.04	-4.54	0.00699301	2.16	0.1064	1.98491	285.077	661.6	11	Down
M285T759	1.11713e+06	964662	1.43636e+06	1.50999e+06	2.02428e+06	1.4155e+06	1.78429e+06	1.72004e+06	7.94082e+06	3.53331e+06	1.04164e+07	1.92329e+06	2.22753e+06	3.17229e+06	2.95518e+06	4.52108e+06		1.49653e+06	1.47318e+06	23.26	4.58624e+06	3.3528e+06	65.76	0.33	-1.62	0.0003108	3.51	0.040447	2.21547	285.065	758.6	12.6	Down
M285T89	2.71304e+07	2.96889e+07	3.57078e+07	1.22192e+07	1.65194e+07	1.66671e+07	1.69095e+07	1.66923e+07	1.38159e+07	6.89951e+06	1.19707e+07	1.57852e+07	1.30901e+07	1.46353e+07	1.86257e+07	6.38067e+06		2.14418e+07	1.68009e+07	38.58	1.26504e+07	1.3453e+07	33.25	1.69	0.76	0.014763	1.83	0.158002	1.69602	285.111	88.7	1.5	Up
M285T94_2	1.61544e+06	555310	1.03945e+06	371902	761472	1.01453e+06	526373	170286	3.99632e+06	1.38816e+06	4.67133e+06	6.19002e+06	3.71319e+06	197074	1.32096e+06	1.20762e+06		756845	658391	60.54	2.83558e+06	2.55067e+06	73.9	0.27	-1.91	0.0206682	1.68	0.184282	1.59345	285.131	94	1.6	Down
M286T102	31356.2	11397	20150.3	14269.1	19519.6	11938.2	16634.5	16401.6	21184	33695.4	43729.4	40620.4	23048.3	17142.9	37753.1	11410.3		17708.3	16518	35.93	28573	28371.8	41.74	0.62	-0.69	0.0379176	1.42	0.250052	1.50232	286.163	102.1	1.7	Down
M286T323	27079.7	55780.7	35192.7	30583.7	35993.3	39730.4	50077.5	57815.3	63707.3	75113.2	74052.3	48203.3	67197.2	41423.5	57136.7	44299.7		41531.7	37861.8	27.96	58891.7	60422	22.42	0.71	-0.5	0.0206682	1.68	0.184282	1.71664	286.05	322.7	5.4	Down
M286T552	2159.41	8782.38	9086.3	5695.45	9068.31	9947.17	8315.94	6356.09	4694.42	4577.01	6972.3	3032.28	5572.22	4482.46	5581.93	1764.11		7426.38	8549.16	34.64	4584.59	4635.71	35.03	1.62	0.7	0.014763	1.83	0.158002	1.37051	286.201	551.7	9.2	Up
M286T759	105231	90684.3	135409	142331	189597	134024	194765	173929	262142	792863	770145	181321	233358	315564	312424	659260		145746	138870	26	440885	313994	57.8	0.33	-1.6	0.000621601	3.21	0.0444681	2.25425	286.064	758.6	12.6	Down
M286T88	2.7141e+08	1.11317e+08	2.28329e+08	1.47369e+08	1.28854e+08	1.14692e+08	3.00365e+08	1.49121e+08	2.94832e+08	1.91412e+08	4.67087e+08	3.53236e+08	1.68831e+08	3.81902e+08	3.01429e+08	2.38591e+08		1.81432e+08	1.48245e+08	41.02	2.99665e+08	2.9813e+08	33.43	0.61	-0.72	0.014763	1.83	0.158002	1.7348	286.06	88.1	1.5	Down
M287T103	2.30628e+06	892485	1.38597e+06	873112	1.48062e+06	897976	1.09406e+06	1.06092e+06	1.53223e+06	2.50069e+06	3.07196e+06	2.79979e+06	1.87856e+06	1.25297e+06	2.89465e+06	779246		1.24893e+06	1.07749e+06	38.77	2.08876e+06	2.18963e+06	40.7	0.6	-0.74	0.0498834	1.3	0.285686	1.57955	287.073	103.5	1.7	Down
M287T319	1.7642e+06	1.9483e+06	1.79882e+06	1.56503e+06	1.21853e+06	1.52617e+06	1.78867e+06	1.23282e+06	31461	1.40511e+06	29578.6	24019.3	37456	1.50571e+06	1.17721e+06	1.3855e+06		1.60532e+06	1.66462e+06	16.82	699506	607334	103.04	2.29	1.2	0.004662	2.33	0.0886941	1.65614	287.055	319	5.3	Up
M287T406	75277.8	167440	108478	142283	252950	134137	162500	125087	568081	281547	343221	260827	222670	105993	201203	401276		146019	138210	35.84	298102	271187	47.31	0.49	-1.03	0.014763	1.83	0.158002	1.82443	287.07	406.4	6.8	Down
M287T601	296829	292402	320953	372922	345457	358515	394484	383211	288643	165156	286791	329426	274118	353926	214014	177519		345597	351986	11.22	261199	280454	26.4	1.32	0.4	0.00699301	2.16	0.1064	1.87745	287.058	601.1	10	Up
M287T72	258489	181299	162900	166558	159350	177832	191327	162913	200874	170183	219104	247088	202269	216162	212312	210965		182584	172195	17.85	209870	211638	10.24	0.87	-0.2	0.0281274	1.55	0.216677	1.43684	287.017	71.7	1.2	Down
M287T839	2.16265e+06	3.59778e+06	3.34556e+06	4.12268e+06	2.24177e+06	3.09292e+06	1.57889e+06	2.82819e+06	1.79484e+06	2.74052e+06	564746	2.10203e+06	1.958e+06	1.83146e+06	590057	3.50021e+06		2.8713e+06	2.96056e+06	29.25	1.88523e+06	1.89473e+06	52.37	1.52	0.61	0.0498834	1.3	0.285686	1.46161	287.222	838.8	14	Up
M287T86	2.16214e+08	2.05236e+07	1.06616e+08	1.30196e+07	1.45532e+07	3.10652e+07	1.63954e+07	3.12073e+07	2.8635e+08	2.52119e+07	5.364e+08	5.53912e+08	2.25175e+08	1.7773e+07	4.49496e+07	4.32719e+07		5.61993e+07	2.57944e+07	127.36	2.1663e+08	1.35062e+08	104.2	0.26	-1.95	0.0498834	1.3	0.285686	1.32754	286.977	85.9	1.4	Down
M288T428	426857	271785	156808	51430.6	239823	271005	271874	101949	195745	127805	47546.9	234381	60093.6	51277.3	71486.6	54036.4		223942	255414	52.67	105297	65790.1	69.43	2.13	1.09	0.0281274	1.55	0.216677	1.49029	288.09	427.7	7.1	Up
M288T500	43115	42904.9	45612.8	27576.5	27824.6	28182.3	36262.1	21901.1	78615.2	32167.9	64741.8	125058	82767.9	65560.2	48418.7	34825.8		34172.4	32222.2	26.21	66519.4	65151	45.29	0.51	-0.96	0.0104118	1.98	0.130233	1.78231	287.581	499.6	8.3	Down
M288T550	350379	118320	302664	314200	393892	300389	160014	231073	155980	136308	193719	167477	115374	163480	158808	222531		271366	301526	34.78	164210	161144	19.99	1.65	0.72	0.0281274	1.55	0.216677	1.63304	288.09	550	9.2	Up
M288T88_2	1.20158e+07	6.86885e+06	1.12068e+07	6.47903e+06	6.73566e+06	4.13159e+06	5.92045e+06	6.12329e+06	2.88428e+06	6.12317e+06	1.72744e+06	1.63999e+06	1.64132e+06	4.76385e+06	588180	4.82328e+06		7.43517e+06	6.60734e+06	36.61	3.02394e+06	2.30586e+06	65.34	2.46	1.3	0.0018648	2.73	0.0601903	1.91345	288.067	88.3	1.5	Up
M289T122	2.41748e+06	3.86918e+06	2.16285e+06	2.30945e+06	5.11955e+06	4.09484e+06	2.9949e+06	3.2335e+06	3.16623e+06	1.78566e+06	2.23558e+06	1.17928e+06	1.51382e+06	861181	1.10115e+06	1.84004e+06		3.27522e+06	3.1142e+06	31.42	1.71037e+06	1.64974e+06	43.25	1.91	0.94	0.0029526	2.53	0.0725285	1.95102	289.086	121.8	2	Up
M289T304	1.67432e+06	1.81964e+06	1.33873e+06	1.67388e+06	1.50111e+06	1.9951e+06	1.80855e+06	1.80665e+06	1.28475e+06	1.0722e+06	1.50991e+06	659983	351407	1.09639e+06	1.33079e+06	1.41939e+06		1.70225e+06	1.74048e+06	12.08	1.0906e+06	1.19057e+06	36.54	1.56	0.64	0.0010878	2.96	0.0513787	1.68345	289.05	303.7	5.1	Up
M289T320_1	776466	758188	598947	823279	941666	984154	876991	580033	701613	346556	371867	540386	416338	1.08115e+06	561469	106799		792466	799872	18.54	515772	478362	55.97	1.54	0.62	0.0206682	1.68	0.184282	1.59929	289.049	319.9	5.3	Up
M289T386	122097	170657	148920	170126	65130.5	168779	159314	164934	146208	64043.5	92575.2	154884	144081	118368	85606.9	136141		146245	162124	25.01	117738	127255	28.3	1.24	0.31	0.0379176	1.42	0.250052	1.13341	289.049	385.8	6.4	Up
M289T472	89466.4	67450.2	97159.7	105701	55068	123725	92356.3	44094.8	14387.3	6708.32	31602.9	82329.6	63811.9	15417	53240.6	23179.3		84377.8	90911.4	31.75	36334.6	27391.1	74.64	2.32	1.22	0.004662	2.33	0.0886941	1.93688	289.122	472.1	7.9	Up
M289T754	292606	207352	358975	306400	125770	237155	121488	64784	607972	194399	411271	308365	415520	355644	202888	381400		214316	222254	48.27	359682	368522	36.77	0.6	-0.75	0.0379176	1.42	0.250052	1.51453	288.647	753.8	12.6	Down
M289T77	6.25921e+07	1.68675e+07	8.46191e+07	5.02508e+07	1.86934e+07	1.40846e+07	1.3897e+07	1.11674e+07	9.61453e+07	8.81761e+07	1.07677e+08	9.68716e+07	8.6826e+07	4.383e+07	6.91668e+07	9.10864e+07		3.40215e+07	1.77804e+07	82.34	8.49724e+07	8.96312e+07	23.43	0.4	-1.32	0.0018648	2.73	0.0601903	2.1266	289.033	76.5	1.3	Down
M290T373	490834	728099	561180	509529	438831	747778	533588	548278	23664.7	132297	38480.7	33159.9	23784	477881	486407	490423		569764	540933	19.41	213262	85388.9	106.76	2.67	1.42	0.0010878	2.96	0.0513787	1.89006	290.07	372.5	6.2	Up
M290T69_1	129300	115687	108779	23608.4	196303	30339.6	127434	152186	259423	232476	415512	366187	307117	166620	175541	164432		110455	121560	52.73	260913	245949	36.48	0.42	-1.24	0.0010878	2.96	0.0513787	1.95555	290.052	68.7	1.1	Down
M290T90	2.47308e+06	2.22979e+06	2.29427e+06	2.47813e+06	1.46709e+06	2.45703e+06	2.54759e+06	3.36409e+06	117375	188870	154260	965834	804125	1.85617e+06	2.07118e+06	1.07612e+06		2.41388e+06	2.46505e+06	21.44	904242	884979	83.65	2.67	1.42	0.000621601	3.21	0.0444681	1.98711	290.143	90	1.5	Up
M291T111	436177	483202	503766	534941	367388	459691	527087	487234	342601	247399	340017	378600	357219	469401	290793	261431		474936	485218	11.44	335933	341309	21.22	1.41	0.5	0.0018648	2.73	0.0601903	2.25455	291.12	111.4	1.9	Up
M291T324	412794	265808	397207	329400	503919	438448	313142	446736	764611	714568	811507	436075	582115	541230	492934	608778		388432	405000	20.43	618977	595447	21.53	0.63	-0.67	0.0018648	2.73	0.0601903	2.23893	291.065	324.5	5.4	Down
M291T384	265629	406183	221989	342753	288409	292563	414089	239792	288107	122215	305389	232118	152359	237630	130353	224344		308926	290486	23.39	211564	228231	32.95	1.46	0.55	0.0281274	1.55	0.216677	1.75417	291.048	383.9	6.4	Up
M291T393	175487	241195	81370.5	180147	210471	273431	462485	379812	662792	501579	682689	506571	720887	179248	213899	263556		250550	225833	48.43	466403	504075	47.28	0.54	-0.9	0.0498834	1.3	0.285686	1.42798	291.036	393.1	6.6	Down
M291T590	92936.7	79667.1	101566	38575	28526.1	75447.7	55501.9	84943.9	228390	162970	270233	321954	354264	61395.2	71410.8	82480.9		69645.6	77557.4	37.54	194137	195680	60.03	0.36	-1.48	0.0498834	1.3	0.285686	1.78209	291.124	590.1	9.8	Down
M291T93	1.42905e+06	2.00915e+06	1.55535e+06	2.05405e+06	1.79891e+06	2.07448e+06	2.60958e+06	1.97721e+06	396639	1.55934e+06	351261	4441.77	334317	1.03754e+06	1.2489e+06	1.12809e+06		1.93847e+06	1.99318e+06	18.65	757567	717091	73.01	2.56	1.36	0.000621601	3.21	0.0444681	1.39335	291.167	93.1	1.6	Up
M292T126	6.49631e+06	7.0959e+06	1.10458e+07	8.30738e+06	5.42763e+06	9.33109e+06	7.59087e+06	1.12341e+07	6.18657e+06	4.70712e+06	6.14443e+06	7.65882e+06	6.57192e+06	5.95852e+06	5.00522e+06	6.58997e+06		8.31614e+06	7.94912e+06	25.17	6.10282e+06	6.1655e+06	15.25	1.36	0.45	0.0281274	1.55	0.216677	1.79941	292.14	125.7	2.1	Up
M292T348	338720	47625.8	245370	43967.4	263236	265876	225094	248943	384444	297962	365885	280665	366281	330479	293605	548008		209854	247156	50.77	358416	348182	23.91	0.59	-0.77	0.0018648	2.73	0.0601903	1.66187	292.119	348	5.8	Down
M292T355	6089.49	5555.47	7449.46	3542.68	5384.18	3345.73	11970.2	7626.59	45080.6	23450.5	47573.7	25269.2	33946.2	5585.44	8517.08	24609		6370.48	5822.48	43.18	26754	24939.1	56.85	0.24	-2.07	0.0029526	2.53	0.0725285	2.18304	292.049	355.4	5.9	Down
M292T373_1	122675	265798	165479	203207	152772	192569	153221	43887.2	215870	365744	294421	310940	234372	257401	187042	342827		162451	159350	39.67	276077	275911	22.78	0.59	-0.77	0.004662	2.33	0.0886941	1.72947	292.049	372.9	6.2	Down
M293T126	2.31701e+06	1.898e+06	1.60525e+06	2.86526e+06	2.37722e+06	1.98157e+06	3.77609e+06	1.79934e+06	78088.7	2.80282e+06	80960.7	108477	39806.2	808757	979298	1.2493e+06		2.32747e+06	2.14929e+06	30.36	768438	458617	123.77	3.03	1.6	0.004662	2.33	0.0886941	1.87285	293.142	126	2.1	Up
M293T303	599896	732947	128575	605145	481812	458856	618400	807102	95300.3	111595	119308	159258	330554	432780	311595	65991.4		554091	602520	37.37	203298	139283	66.65	2.73	1.45	0.0018648	2.73	0.0601903	2.00862	292.944	302.8	5	Up
M293T334	307160	153809	510095	943168	209338	910495	763979	990477	236792	138638	205031	135933	263126	251447	223251	179983		598565	637037	57.84	204275	214141	23.89	2.93	1.55	0.0206682	1.68	0.184282	1.92989	293.088	333.7	5.6	Up
M293T83	5.8863e+06	6.2002e+06	5.63827e+06	4.78492e+06	5.93771e+06	4.48329e+06	5.70378e+06	5.59342e+06	239692	1.0106e+07	257568	127715	306973	5.28731e+06	4.95357e+06	4.29533e+06		5.52849e+06	5.67103e+06	10.68	3.19677e+06	2.30115e+06	113.13	1.73	0.79	0.0379176	1.42	0.250052	1.49432	292.805	83.1	1.4	Up
M294T303_1	579957	604937	435771	495670	648075	633761	824906	1.02454e+06	330721	394422	497364	551559	168456	348426	435063	72874.6		655952	619349	28.67	349860	371424	46.05	1.87	0.91	0.0018648	2.73	0.0601903	1.78571	293.938	302.9	5	Up
M294T530	97641.3	2.29746e+06	738254	509221	51067.6	711312	738241	581641	48768	98430.1	335478	51723.3	197106	207552	468461	303657		715605	646477	97.21	213897	202329	69.54	3.35	1.74	0.0498834	1.3	0.285686	1.2993	294.134	529.8	8.8	Up
M294T804	2.50761e+07	2.82203e+07	9.54583e+06	9.13993e+06	5.63227e+06	2.61642e+07	2.59682e+07	4.29019e+07	399963	7.71584e+06	5.55926e+06	1.47903e+06	551336	6.3185e+06	8.38286e+06	8.13615e+06		2.15811e+07	2.55222e+07	58.22	4.81787e+06	5.93888e+06	71.81	4.48	2.16	0.0018648	2.73	0.0601903	1.88694	294.181	803.9	13.4	Up
M294T84	872183	792463	1.13953e+06	893428	628709	754260	780004	764657	1.24806e+06	532394	1.5562e+06	1.02752e+06	934806	1.04936e+06	918810	1.12641e+06		828154	786233	18.03	1.0492e+06	1.03844e+06	27.91	0.79	-0.34	0.0498834	1.3	0.285686	1.1483	293.989	84.3	1.4	Down
M295T301_2	1.66827e+06	2.09014e+06	2.09422e+06	1.38808e+06	947106	2.263e+06	1.73596e+06	1.40435e+06	960901	944309	640800	581282	701720	1.23392e+06	1.1285e+06	1.1234e+06		1.69889e+06	1702117	26.12	914353	952605	26.97	1.86	0.89	0.0018648	2.73	0.0601903	2.13266	295.051	301.2	5	Up
M295T337	128857	213754	159007	114708	175312	125650	206411	147001	128128	133352	95946.9	33921.5	120756	123955	129876	109693		158838	153004	23.36	109453	122355	30.03	1.45	0.54	0.0206682	1.68	0.184282	1.36446	295.043	337	5.6	Up
M295T597	1.03467e+07	6.31652e+06	1.23878e+07	1.08351e+07	2.41984e+06	1.08418e+07	1.08092e+07	1.10939e+07	1.73015e+07	8.78773e+06	2.32904e+07	2.32438e+07	1.49607e+07	1.22211e+07	1.40999e+07	1.45956e+07		9.38135e+06	1.08222e+07	35.36	1.60626e+07	1.47782e+07	31.59	0.58	-0.78	0.00699301	2.16	0.1064	1.56745	294.982	596.7	9.9	Down
M295T63	33407.9	21044.2	44539.7	16780.8	32431.3	16777.3	28737.2	23358.1	29658.4	16190.8	45527.1	70478.4	38054.2	79680.7	57900.9	43877		27134.6	26047.7	35.2	47670.9	44702.1	43.98	0.57	-0.81	0.0498834	1.3	0.285686	1.49224	294.53	63.4	1.1	Down
M295T718	955455	783349	1.09391e+06	202309	1.74954e+06	622176	864887	1.07156e+06	4.06839e+06	2.99865e+06	3.66902e+06	2.21473e+06	2.77768e+06	967890	2.38977e+06	3.01957e+06		917899	910171	48.16	2.76321e+06	2.88817e+06	34.36	0.33	-1.59	0.0010878	2.96	0.0513787	2.25684	294.988	717.9	12	Down
M295T804	4.21578e+06	6.15661e+06	4.03767e+06	2.71046e+06	1.12421e+06	5.29801e+06	4.76354e+06	6.01485e+06	67788.3	1.6508e+06	656044	250590	93453.6	1.32082e+06	1.88768e+06	1.82093e+06		4.29014e+06	4.48966e+06	39.68	968513	988431	81.4	4.43	2.15	0.0018648	2.73	0.0601903	1.96362	295.175	803.9	13.4	Up
M296T306	467462	526476	436873	488873	500376	354818	545929	419200	364491	308556	58911.2	285899	262652	362414	321690	342793		467501	478168	13.32	288426	315123	34.44	1.62	0.7	0.000621601	3.21	0.0444681	1.68735	296.099	305.5	5.1	Up
M296T336	1.09303e+06	420230	1.05122e+06	615343	927764	61279.6	415920	367195	1.29576e+06	824389	1.8412e+06	1.4883e+06	1.07027e+06	577491	924865	1.5966e+06		618997	517786	59.89	1.20236e+06	1.18302e+06	35.59	0.51	-0.96	0.0281274	1.55	0.216677	1.64624	296.115	335.7	5.6	Down
M296T394	2.5023e+06	3.50662e+06	5.00349e+06	69382.6	2.88441e+06	3.3571e+06	3.33072e+06	695068	5.60868e+06	4.46256e+06	4.47169e+06	8.8538e+06	9.18529e+06	4.82191e+06	4.38211e+06	5.83031e+06		2.66864e+06	3.10756e+06	59.74	5.95204e+06	5.21529e+06	33.09	0.45	-1.16	0.0018648	2.73	0.0601903	1.58202	296.037	393.5	6.6	Down
M296T433	1.35019e+06	669188	802473	164430	1.60604e+06	1.19291e+06	830190	1.17249e+06	2.77948e+06	2.28846e+06	4.27119e+06	1.72011e+06	2.69888e+06	181834	2.97646e+06	1.0498e+06		973488	1.00134e+06	46.38	2.24578e+06	2.49367e+06	56.06	0.43	-1.21	0.0281274	1.55	0.216677	1.30298	296.081	433	7.2	Down
M296T542	22169.9	45096.3	57554.5	145289	23760.5	36678.2	35573.1	34900.7	147716	331548	137784	251923	115580	138683	203046	103363		50127.8	36125.6	79.93	178706	143200	43.97	0.28	-1.83	0.0018648	2.73	0.0601903	2.27557	296.186	541.6	9	Down
M296T69_1	593706	903971	796203	358442	571586	522495	501230	563583	431096	273953	382145	483952	469474	395192	394588	237030		601402	567585	28.61	383429	394890	22.79	1.57	0.65	0.004662	2.33	0.0886941	1.89837	296.018	69.2	1.2	Up
M296T837	2.28601e+07	3.8887e+07	2.35879e+07	1.01831e+07	1.37561e+07	1.60519e+07	2.62669e+07	1.56807e+07	1.27334e+07	7.17097e+06	2.10748e+07	1.46985e+07	1.56268e+07	1.25112e+07	1.0198e+07	1.39791e+07		2.09092e+07	1.9456e+07	43.54	1.34991e+07	1.33563e+07	30.17	1.55	0.63	0.0498834	1.3	0.285686	1.39392	296.142	837	13.9	Up
M296T90	232655	229138	344660	221052	205898	633127	392857	241628	688298	437024	647257	343354	620845	395364	514958	563381		312627	237141	46.57	526310	539170	23.81	0.59	-0.75	0.0104118	1.98	0.130233	1.95932	296.086	89.6	1.5	Down
M297T319_1	197087	237217	196435	233406	197660	252295	270213	251421	5532.97	246468	23630.5	47240	3296.34	104799	138624	120228		229467	235312	12.64	86227.4	76019.7	96.78	2.66	1.41	0.0029526	2.53	0.0725285	1.76823	297.084	319.1	5.3	Up
M297T329_2	178544	107259	206844	110417	178554	121295	96691.6	96812.3	196236	216021	259037	231963	194982	119782	186920	219046		137052	115856	31.93	202998	206129	20.14	0.68	-0.57	0.00699301	2.16	0.1064	1.92518	297.103	329	5.5	Down
M297T356	626363	452529	667799	406007	269810	394383	309185	239715	385049	638892	1.25884e+06	967244	1.1733e+06	922630	464332	779831		420724	400195	37.39	823764	851230	38.38	0.51	-0.97	0.0104118	1.98	0.130233	1.87935	297.055	356.2	5.9	Down
M297T746	5.13132e+07	1.20503e+07	8.89038e+06	1.44144e+07	3.56724e+07	1.86475e+07	1.46168e+07	2.58396e+06	3.83048e+07	3.33984e+07	2.0817e+07	1.91829e+07	3.0632e+07	3.74443e+07	1.50153e+07	6.37061e+07		1.97736e+07	1.45156e+07	80.59	3.23126e+07	3.20152e+07	47.59	0.61	-0.71	0.0498834	1.3	0.285686	1.40632	296.983	746.4	12.4	Down
M297T83	4.50431e+06	4.05859e+06	4.07598e+06	3.99597e+06	3.73738e+06	4.95196e+06	3.89459e+06	4.31694e+06	3.54234e+06	3.69309e+06	3.98847e+06	3.91338e+06	4.13672e+06	3.35825e+06	4.00364e+06	3.36658e+06		4.19196e+06	4.06728e+06	9.26	3.75031e+06	3.80323e+06	8.09	1.12	0.16	0.0379176	1.42	0.250052	1.6058	296.888	83.5	1.4	Up
M297T92	701962	879154	959545	1.18057e+06	974638	882326	1.04032e+06	847628	1.8751e+06	1.50069e+06	1.71228e+06	1.71105e+06	1.13447e+06	1.39769e+06	891996	1.80915e+06		933268	920936	15.23	1.50405e+06	1.60587e+06	23.02	0.62	-0.69	0.0029526	2.53	0.0725285	2.08936	297.082	91.6	1.5	Down
M298T374	136108	135650	143081	134193	127743	151095	146903	140537	153252	130027	146090	176055	166156	153544	148672	157395		139414	138323	5.39	153899	153398	8.9	0.91	-0.14	0.0206682	1.68	0.184282	1.48451	297.928	374.3	6.2	Down
M298T414	160314	148813	121178	169521	166561	169858	95687.6	94527.8	41373.3	15132.6	85559.9	93646	88192.7	72499.2	121198	27687.5		140808	154563	23	68161.1	79029.5	53.63	2.07	1.05	0.0010878	2.96	0.0513787	1.93378	298.038	414.2	6.9	Up
M299T102	567230	607231	647016	697832	708505	837581	871725	883664	465829	742687	448303	317848	386235	478308	499985	574471		727598	703168	16.85	489208	472068	26.08	1.49	0.57	0.004662	2.33	0.0886941	1.9748	299.172	101.7	1.7	Up
M299T484	512315	317370	522400	612594	396178	384206	496006	547968	209470	382502	480934	104545	474558	407238	119111	115143		473630	504160	20.75	286688	295986	57.98	1.65	0.72	0.0206682	1.68	0.184282	1.60316	299.042	483.9	8.1	Up
M299T486	94225.3	89607	84437.4	112367	77641.9	101483	104586	78614	75555.7	65469.5	71810.4	72404.1	63412.2	66077.4	56990.3	65566.3		92870.2	91916.1	13.56	67160.7	65821.9	8.78	1.38	0.47	0.0001554	3.81	0.0365579	2.4139	299.07	485.6	8.1	Up
M299T83_2	2.1296e+06	2.03473e+06	2.52572e+06	1.98173e+06	1.86694e+06	3.38969e+06	1.92476e+06	1.98385e+06	2.39459e+06	2.53556e+06	3.64132e+06	2.10878e+06	3.09009e+06	3.51838e+06	2.10236e+06	3.18337e+06		2.22963e+06	2.00929e+06	22.92	2.82181e+06	2.81282e+06	21.8	0.79	-0.34	0.0281274	1.55	0.216677	1.44898	298.886	83.3	1.4	Down
M300T317	545194	919963	661190	657362	503041	801905	426313	1.81887e+06	486426	383638	675048	397547	376068	452368	430169	520086		791730	659276	56.17	465169	441269	21.2	1.7	0.77	0.0206682	1.68	0.184282	1.64837	300.181	317.1	5.3	Up
M301T126	237141	196470	200815	191440	348545	159786	226095	209686	237294	208459	325142	278788	254153	261280	286187	219030		221247	205251	25.52	258792	257716	14.72	0.85	-0.23	0.0498834	1.3	0.285686	1.2945	301.034	126.1	2.1	Down
M301T629	84418.3	118754	102353	54147.3	98763.3	125357	69947.5	46200.8	98820	226657	354032	353081	271431	131542	93128.4	304379		87492.5	91590.8	33.16	229134	249044	47.64	0.38	-1.39	0.00699301	2.16	0.1064	2.02989	301.201	629.1	10.5	Down
M301T79	2.36168e+06	2.29139e+06	2.32211e+06	2.2312e+06	2.12951e+06	2.21249e+06	2.3038e+06	2.29614e+06	3.25194e+06	2.19814e+06	2.53616e+06	2.41423e+06	3.12724e+06	2.65121e+06	2.39906e+06	2.57898e+06		2.26854e+06	2.29377e+06	3.25	2.64462e+06	2.55757e+06	13.79	0.86	-0.22	0.00699301	2.16	0.1064	1.75321	301.053	79	1.3	Down
M301T802	2.16984e+06	3.01412e+06	1.25768e+06	2.37665e+06	1.43106e+07	5.35988e+06	5.01576e+06	5.47624e+06	2.33366e+06	2.16574e+06	2.4366e+06	1.81754e+06	630531	1.46347e+06	406090	332774		4.8726e+06	4.01494e+06	84.89	1.4483e+06	1.64051e+06	60.71	3.36	1.75	0.0104118	1.98	0.130233	1.83364	301.18	801.9	13.4	Up
M301T99	570817	2.29844e+06	696390	1.92041e+06	2.03516e+06	563498	3.42568e+06	3.96237e+06	431704	1.13101e+06	444004	530142	473768	1.5292e+06	1.31783e+06	1.06928e+06		1.9341e+06	1.97778e+06	66.99	865866	799709	51.44	2.23	1.16	0.0379176	1.42	0.250052	1.3815	301.042	98.9	1.6	Up
M302T100	356068	33069.2	69740.6	45149.8	31487.5	69145.3	17147.9	40368.8	1.6495e+06	40062.5	2.0665e+06	3.89388e+06	760208	506027	568520	454162		82772.1	42759.3	135.2	1242358	664364	101.68	0.07	-3.91	0.0029526	2.53	0.0725285	2.13997	302.019	99.9	1.7	Down
M302T286_2	1.13075e+06	1.49336e+06	1.22454e+06	1.16187e+06	798251	1.31402e+06	1.16355e+06	1.51059e+06	1.14515e+06	748565	147934	852064	204120	291177	562516	819882		1.22462e+06	1.19404e+06	18.53	596426	655541	59.75	2.05	1.04	0.0018648	2.73	0.0601903	1.9142	301.97	285.8	4.8	Up
M302T303	318124	449374	288610	226855	703324	536108	352451	452177	269818	215251	294925	169525	194839	114544	139313	231088		415878	400912	36.92	203663	205045	30.45	2.04	1.03	0.0018648	2.73	0.0601903	2.02777	301.932	302.9	5	Up
M302T363	1.00048e+06	1.4348e+06	1.10955e+06	1.55331e+06	915397	2.26696e+06	2.07767e+06	2.43412e+06	309373	476590	258775	260496	387259	454762	692588	664938		1.59904e+06	1.49405e+06	37.12	438098	421010	38.66	3.65	1.87	0.0001554	3.81	0.0365579	2.49513	302.106	362.9	6	Up
M302T88_1	2.73893e+06	2.43473e+06	3.72964e+06	2.65825e+06	1.96675e+06	4.00666e+06	2.99151e+06	4.20131e+06	1.70631e+06	1.88018e+06	2.59655e+06	480563	1.50973e+06	2.39615e+06	2.49159e+06	2.45569e+06		3.09097e+06	2.86522e+06	25.92	1.9396e+06	2.13817e+06	36.88	1.59	0.67	0.00699301	2.16	0.1064	1.45376	302.075	87.6	1.5	Up
M303T122	3.5873e+06	3.54465e+06	2.6167e+06	2.76683e+06	2.02651e+06	3.98168e+06	3.12171e+06	2.20055e+06	2.68913e+06	1.33087e+06	1.86137e+06	1.83503e+06	2.25668e+06	1.82673e+06	2.61933e+06	2.31152e+06		2.98074e+06	2.94427e+06	23.4	2.09134e+06	2059028	21.98	1.43	0.51	0.0206682	1.68	0.184282	1.76732	303.058	121.8	2	Up
M303T303	610540	650889	839667	661504	670235	512613	574474	844345	721991	778700	1.00082e+06	1.15115e+06	794766	739595	868970	732791		670533	656197	17.56	848597	786733	18.05	0.79	-0.34	0.0206682	1.68	0.184282	1.65656	303.05	303.5	5.1	Down
M303T424	34486.4	8786.01	27927.3	9601.15	27120.4	2221.11	8047.57	2220.06	30937.9	30418.2	47797.9	36768.2	23994.5	19031	34797.2	47992.1		15051.2	9193.58	84.65	33967.1	32867.6	30.29	0.44	-1.17	0.0104118	1.98	0.130233	1.90766	303.138	424.5	7.1	Down
M303T785	1.48471e+07	2.95422e+06	8.80445e+06	3.17857e+06	1.52454e+07	4.34409e+06	1.84651e+06	2.32831e+06	1.90037e+07	1.58218e+07	3.68328e+07	3.44493e+07	1.38781e+07	5.58595e+06	1.97313e+07	1.91866e+07		6.69358e+06	3.76133e+06	83.46	2.05612e+07	1.90952e+07	50.48	0.33	-1.62	0.0029526	2.53	0.0725285	2.07448	303.226	785.3	13.1	Down
M303T806	3.46023e+07	4.42133e+07	3.54627e+07	3.69837e+07	4.26306e+07	7.74008e+07	5.04891e+07	8.01845e+07	1.70324e+07	4.32805e+07	2.63092e+07	2.70567e+07	2.26017e+07	1.26948e+07	3.36623e+07	3.94534e+07		5.02459e+07	4.3422e+07	36.6	2.77614e+07	2.6683e+07	38.11	1.81	0.86	0.00699301	2.16	0.1064	1.82114	303.24	805.7	13.4	Up
M303T838_2	1.37063e+08	1.12682e+08	1.8333e+08	2.03397e+08	4.06402e+07	3.49887e+08	2.84812e+08	3.05459e+08	4.06193e+07	5.56603e+07	5.92987e+07	3.0781e+07	8.9647e+07	3.72154e+07	9.31019e+07	3.213e+07		2.02159e+08	1.93363e+08	52.22	5.48067e+07	4.81398e+07	45.24	3.69	1.88	0.0018648	2.73	0.0601903	2.12366	303.239	837.9	14	Up
M304T301	84837.1	102436	113122	91266.6	63730.5	101135	92221.1	106553	5286.04	50938.1	7327.83	4256.13	4856.59	80746.3	71934.3	67339.8		94412.6	96677.8	16.29	36585.6	29133	93.77	2.58	1.37	0.0010878	2.96	0.0513787	1.82175	304.087	301	5	Up
M304T374	199153	395911	176009	196338	359293	218628	288839	298318	533290	505367	527356	611446	362232	413836	418829	208140		266561	253734	30.68	447562	462098	28.07	0.6	-0.75	0.004662	2.33	0.0886941	1.79536	304.049	373.9	6.2	Down
M304T417	318610	219339	122307	291221	225120	244762	132686	145955	50511.6	39518.3	112003	106612	134630	91896.9	244481	37959.4		212500	222230	34.51	102202	99254.6	66.41	2.08	1.06	0.00699301	2.16	0.1064	1.88778	304.133	417.4	7	Up
M304T551	12015.3	770.221	17633.4	944.843	1232.7	2143.51	614.938	1642.77	27765.9	2089.68	82167	40989.5	42772.9	1090.35	7462.07	10530.6		4624.7	1437.74	140.34	26858.5	19148.2	103.73	0.17	-2.54	0.0379176	1.42	0.250052	1.66495	304.122	550.8	9.2	Down
M304T74	688073	891317	877360	740295	733009	753691	1.08676e+06	865764	422276	715052	679004	432324	426212	708359	1.02697e+06	798609		829534	809727	15.56	651101	693681	32.94	1.27	0.35	0.0498834	1.3	0.285686	1.33796	304.06	73.7	1.2	Up
M304T839	4.56911e+07	1.57519e+07	3.21241e+07	5.98043e+07	1.27729e+07	1.07032e+08	1.00891e+08	5.15464e+07	2.95557e+07	8.90892e+06	6.09555e+06	7.86936e+06	2.4044e+07	2.57618e+07	3.92644e+07	1.01638e+07		5.32018e+07	4.86188e+07	66.48	1.89579e+07	1.71039e+07	65.02	2.81	1.49	0.014763	1.83	0.158002	1.70336	304.236	839	14	Up
M305T293	4.3549e+06	5.2602e+06	4.86156e+06	3.47467e+06	2.63715e+06	5.01825e+06	4.65923e+06	3.93449e+06	375070	2.69617e+06	535598	36133	568028	3.62446e+06	2.88427e+06	2.45093e+06		4.27506e+06	4.50707e+06	20.66	1.64633e+06	1.50948e+06	85.29	2.6	1.38	0.0018648	2.73	0.0601903	1.61819	305.055	293.2	4.9	Up
M305T304	71738.4	63810.7	67983.9	163966	164447	305229	55539.3	134299	497557	90966.3	494931	394554	336756	117135	126748	185660		128377	103019	65.97	280538	261208	60.93	0.46	-1.13	0.0498834	1.3	0.285686	1.41776	305.045	303.5	5.1	Down
M305T330	38711.1	76791.4	56088.3	55569.4	34608.6	104204	70289.8	78947.5	131019	45343.8	88010.6	125663	137850	94323	59394.2	112779		64401.2	63189	35.6	99297.9	103551	34.1	0.65	-0.62	0.0379176	1.42	0.250052	1.28768	305.081	329.5	5.5	Down
M305T590	50599.1	34606.6	47475.5	88977.9	44723.2	76085	75295.7	40892.6	571532	71668.9	427311	515603	388027	33009.3	115541	126534		57331.9	49037.3	34.66	281153	257281	77.09	0.2	-2.29	0.0281274	1.55	0.216677	1.80505	305.139	590.1	9.8	Down
M306T93	105259	33093.9	76207	31594.9	63570.7	77867.8	164914	447328	610388	419576	1.28951e+06	662825	230681	94777.1	86514.5	63822.6		124979	77037.4	109.64	432262	325128	96.96	0.29	-1.79	0.0498834	1.3	0.285686	1.48611	306.131	92.9	1.5	Down
M306T96	1.36862e+08	1.04966e+08	5.06747e+07	1.35192e+08	1.57849e+08	1.9606e+08	1.02997e+08	1.67134e+08	4.18598e+07	1.20595e+07	1.0663e+07	1.73018e+08	9.75356e+06	8.4414e+07	2.39639e+07	1.12446e+08		1.31467e+08	1.36027e+08	34.29	5.85222e+07	3.29119e+07	102.09	2.25	1.17	0.0281274	1.55	0.216677	1.88283	306.076	95.9	1.6	Up
M307T328	120548	71291.4	82240.5	67638	83935.7	68991	86678.9	140260	142579	112858	202338	114319	179843	95327.1	135468	95595.1		90197.9	83088.1	29.21	134791	124894	28.93	0.67	-0.58	0.014763	1.83	0.158002	1.84159	307.123	328.1	5.5	Down
M307T94	2.33196e+06	1.48242e+06	1.88667e+06	2.094e+06	1.88465e+06	1.68557e+06	1.6369e+06	1.57419e+06	1.08959e+06	1.14356e+06	1.67694e+06	1.5716e+06	1.53652e+06	1.59055e+06	1.83566e+06	900594		1.82205e+06	1.78511e+06	15.69	1.41813e+06	1.55406e+06	23.23	1.28	0.36	0.0281274	1.55	0.216677	1.60397	307.066	93.6	1.6	Up
M308T37	158265	116997	137030	27847.2	139728	123711	114480	113307	139343	125735	258341	148934	228917	150293	132131	168432		116421	120354	33.47	169016	149613	28.67	0.69	-0.54	0.0206682	1.68	0.184282	1.45866	307.855	37.3	0.6	Down
M308T389	49280.7	238728	34499.5	46028.1	272583	74852	39855.9	11505.3	1698.22	5158.98	29198	40921.6	297.412	1897.04	1999.27	3727.06		95916.5	47654.4	104.82	10612.2	2863.17	145.86	9.04	3.18	0.0018648	2.73	0.0601903	2.10319	308.116	389.4	6.5	Up
M308T783	2.38235e+06	1.18891e+06	2.11714e+06	1.14373e+06	1.33809e+06	893872	1.72318e+06	784970	894133	270621	565630	746765	550998	938618	1.41691e+06	120094		1.44653e+06	1.2635e+06	39.75	687971	656197	59.44	2.1	1.07	0.014763	1.83	0.158002	1.72904	308.194	782.7	13	Up
M308T96_1	1.7109e+06	1.96966e+06	1.79515e+06	1.07054e+06	1.83009e+06	1.73919e+06	1.27347e+06	1.95962e+06	2.59093e+06	3.84392e+06	3.01774e+06	2.21531e+06	1.71113e+06	1.48085e+06	2.58056e+06	2.46689e+06		1.66858e+06	1.76717e+06	19.46	2.48842e+06	2.52372e+06	29.73	0.67	-0.58	0.0281274	1.55	0.216677	1.85684	308.071	95.9	1.6	Down
M309T293	198571	221145	186643	213928	121712	207773	298814	176483	15449.9	6242.98	16103.2	206268	16145.7	195472	26487.5	156507		203134	203172	24.44	79834.5	21316.6	111.8	2.54	1.35	0.0104118	1.98	0.130233	2.01079	309.101	292.7	4.9	Up
M309T369	560778	431377	723058	452784	278488	413529	494695	502910	678748	473545	1.53798e+06	1.08251e+06	578369	705901	500144	735622		482202	473739	26.52	786603	692325	45.49	0.61	-0.71	0.0206682	1.68	0.184282	1.60521	308.981	368.9	6.1	Down
M309T382	107374	178235	145234	82504.9	499795	155898	175263	106369	982132	699835	1.31953e+06	560920	409744	114332	421339	702668		181334	150566	73.48	651312	630378	57.12	0.28	-1.84	0.00699301	2.16	0.1064	2.11818	309.083	381.9	6.4	Down
M309T529	132831	65369	83613.4	37226.1	58805.3	53633.4	153046	131862	26745.2	28658.4	7317.62	6664.81	1369.27	103403	85041	44884.1		89548.3	74491.2	48.66	38010.5	27701.8	99.52	2.36	1.24	0.0281274	1.55	0.216677	1.56235	309.103	529.4	8.8	Up
M309T678	1.05214e+06	526847	1.54484e+06	936931	721856	975421	1.59568e+06	843449	245896	697631	671569	240317	840559	300056	866351	704634		1.02465e+06	956176	36.51	570877	684600	46.46	1.79	0.84	0.0104118	1.98	0.130233	1.53123	309.208	677.9	11.3	Up
M309T704	1.18454e+06	839170	1.68632e+06	975084	1.38588e+06	1.35905e+06	1.04466e+06	1.24561e+06	2.4429e+06	6.77009e+06	1.14438e+06	1.91762e+06	2.2645e+06	1.08502e+06	3.53964e+06	3.01897e+06		1.21504e+06	1.21508e+06	22.04	2.77289e+06	2.3537e+06	65.69	0.44	-1.19	0.0206682	1.68	0.184282	1.89076	309.17	703.6	11.7	Down
M309T746	260743	318786	625990	1.37267e+06	822240	788648	471650	624504	455671	405838	185374	127962	259184	429882	431347	718395		660654	625247	53.19	376707	417860	49.35	1.75	0.81	0.0498834	1.3	0.285686	1.36817	309.101	746	12.4	Up
M309T750	1.73702e+06	2.21116e+06	1.32822e+06	3.43982e+06	1.26831e+06	2.73084e+06	3.89413e+06	5.35203e+06	660502	2.03401e+06	816900	676082	1.65222e+06	1.04552e+06	1.89569e+06	1.97737e+06		2.74519e+06	2.471e+06	51.68	1.34479e+06	1.34887e+06	44.94	2.04	1.03	0.0281274	1.55	0.216677	1.68301	309.207	749.5	12.5	Up
M309T768	298279	4.82354e+06	33624.8	158141	768519	2.56946e+06	2.35521e+06	791123	5.32414e+06	2.967e+07	1.45852e+07	2.26293e+06	3.89928e+06	658939	1.4951e+07	4.0716e+06		1.47474e+06	779821	112.74	9.42788e+06	4.69787e+06	103.86	0.16	-2.68	0.0206682	1.68	0.184282	1.80917	308.977	767.8	12.8	Down
M309T788_2	1.5275e+07	2.32507e+07	2.35918e+07	1.65351e+07	1.15961e+07	8.76015e+06	7.60745e+06	1.38844e+07	9.91603e+06	1.09179e+07	4.78063e+06	6.2845e+06	6.16774e+06	8.88995e+06	4.84512e+06	5.05807e+06		1.50626e+07	1.45797e+07	39.73	7.1075e+06	6.22612e+06	34.41	2.12	1.08	0.004662	2.33	0.0886941	2.05126	309.206	787.5	13.1	Up
M309T84	2.01575e+06	1.79387e+06	2.42007e+06	1.75903e+06	1.81327e+06	1.8592e+06	1.93966e+06	1.60651e+06	2.31466e+06	2.17575e+06	2.09852e+06	1.88976e+06	2.01863e+06	2.77185e+06	1.81933e+06	2.66353e+06		1.90092e+06	1.83624e+06	12.76	2.219e+06	2.13714e+06	15.58	0.86	-0.22	0.0281274	1.55	0.216677	1.48755	308.915	83.5	1.4	Down
M309T90	7.34456e+06	6.43309e+06	1.10134e+07	7.27429e+06	3.29898e+06	8.23743e+06	6.79717e+06	7.28291e+06	1.40995e+07	1.69203e+07	1.40848e+07	2.13608e+07	1.63266e+07	1.47181e+07	1.10879e+07	1.58267e+07		7.21022e+06	7.2786e+06	29.48	1.55531e+07	1.52724e+07	19.01	0.46	-1.11	0.0001554	3.81	0.0365579	2.33964	309.101	90.4	1.5	Down
M310T363	116046	152673	166429	138213	163292	146261	190455	249973	76695.8	115574	160289	126808	107009	126648	119950	185097		165418	157983	24.49	127259	123299	25.88	1.3	0.38	0.0498834	1.3	0.285686	1.42715	310.089	362.7	6	Up
M310T87	1.30023e+06	1.48801e+06	1.5881e+06	1.23419e+06	5.06212e+06	1.23793e+06	5.67567e+06	1.22399e+06	9.01763e+06	4.94824e+06	9.70904e+06	7.49166e+06	8.59369e+06	1.72212e+06	6.59176e+06	1.39998e+06		2.35128e+06	1.39412e+06	79.71	6.18426e+06	7.04171e+06	52.03	0.38	-1.4	0.0104118	1.98	0.130233	1.73118	310.029	86.6	1.4	Down
M311T111	1.40443e+06	1.4664e+06	1.74058e+06	1.27486e+06	1.71089e+06	1.21434e+06	1.5905e+06	1.5683e+06	2.81604e+06	1.5985e+06	2.58674e+06	1.95067e+06	3.00802e+06	1.8397e+06	1.60833e+06	1.9978e+06		1.49629e+06	1.51735e+06	12.82	2.17572e+06	1.97423e+06	25.31	0.69	-0.54	0.0018648	2.73	0.0601903	1.98629	311.038	111.1	1.9	Down
M311T285	210929	43112.6	86192.4	122200	62487.4	43240.6	83739.3	64757.5	565484	807887	600252	182754	614906	975620	974281	697013		89582.4	74248.4	61.85	677275	655959	37.91	0.13	-2.92	0.0003108	3.51	0.040447	2.62379	311.004	285.1	4.8	Down
M311T354	40057.9	18985.4	18094.8	18445.8	451618	17701.6	48591.9	178692	435345	537128	826354	31192.3	295319	19887.5	377747	352762		99023.4	29521.7	153.98	359467	365254	73.07	0.28	-1.86	0.0379176	1.42	0.250052	1.69338	311.118	353.8	5.9	Down
M311T377	11047.5	35944.5	57716.3	32442.7	3100.13	43100.3	5549.32	25230.1	15975.1	2814.91	2469.84	14009.3	9313.86	10232.5	995.693	16505.5		26766.3	28836.4	72.01	9039.6	9773.2	69.55	2.96	1.57	0.0498834	1.3	0.285686	1.5016	311.074	377.3	6.3	Up
M311T799	1.19327e+07	7.3408e+06	3.36266e+06	3.0428e+06	1.96263e+06	2.62998e+06	1.36454e+06	2.22903e+06	6.84101e+06	9.94941e+06	1.58366e+07	3.53339e+06	2.95436e+06	1.72285e+07	6.80919e+06	1.18684e+07		4.23314e+06	2.83639e+06	85.21	9.37761e+06	8.39521e+06	56.76	0.45	-1.15	0.0379176	1.42	0.250052	1.69043	311.221	799	13.3	Down
M311T90	2.46186e+06	3.36069e+06	2.39807e+06	3.34277e+06	2.29865e+06	1.92196e+06	2.59774e+06	2.56576e+06	3.40168e+06	2.97307e+06	3.5513e+06	2.70837e+06	3.62208e+06	3.81799e+06	4.98053e+06	2.29527e+06		2.61844e+06	2.51381e+06	19.04	3.41879e+06	3.47649e+06	23.77	0.77	-0.38	0.0281274	1.55	0.216677	1.52461	311.117	90.2	1.5	Down
M312T107	136254	54003.1	116159	92558.3	117537	48563.8	101817	72647.7	224106	395901	312352	290506	135176	136895	240119	128087		92442.6	97187.5	34.19	232893	232112	41.72	0.4	-1.33	0.000621601	3.21	0.0444681	2.25539	312.08	107.3	1.8	Down
M312T286	1.82195e+06	1.30858e+06	1.93024e+06	1.40308e+06	1.83374e+06	1.29158e+06	1.24649e+06	1.88394e+06	1.61465e+06	2.47909e+06	2.34578e+06	2.14666e+06	2.14325e+06	1.69417e+06	1.85973e+06	1.94115e+06		1.58995e+06	1.61252e+06	18.97	2.02806e+06	2.0422e+06	15.03	0.78	-0.35	0.0206682	1.68	0.184282	1.83844	312.002	286.5	4.8	Down
M312T303_1	125396	116736	160618	74337.4	148849	53592.4	14042.6	26905.8	248205	113750	299402	471404	276030	31659.5	158068	207597		90059.7	95536.7	61.88	225765	227901	58.94	0.4	-1.33	0.0281274	1.55	0.216677	1.51669	312.002	302.6	5	Down
M312T320	1.16245e+06	2.99559e+06	934198	7.15826e+06	672205	735116	745766	2.70564e+06	751688	343015	15343	662499	26147.7	1.08554e+06	2.72578e+06	601531		2.13865e+06	1.04832e+06	104.13	776444	632015	111.75	2.75	1.46	0.0498834	1.3	0.285686	1.48848	312.075	320.3	5.3	Up
M312T335	2.3491e+07	1.67205e+07	1.92983e+07	1.89569e+07	1.76622e+06	2.16766e+07	2.6666e+07	2.13437e+07	7.14819e+06	1.2964e+06	5.5095e+06	1.19337e+07	1.15902e+07	1.03397e+07	1.15664e+07	9.85947e+06		18739897	2.0321e+07	40	8.65544e+06	1.00996e+07	43.33	2.17	1.11	0.00699301	2.16	0.1064	1.33209	312.094	335.1	5.6	Up
M312T72	521680	358388	367433	316508	324668	336834	428690	373411	381058	353595	483168	553130	411671	493818	552901	398307		378452	362910	17.88	453456	447419	17.15	0.83	-0.26	0.0498834	1.3	0.285686	1.42128	311.96	71.7	1.2	Down
M312T783	1.48533e+07	1.28993e+07	1.29827e+07	6.55599e+06	1.16935e+07	7.62462e+06	1.09595e+07	7.5607e+06	5.65336e+06	2.16981e+06	3.06971e+06	4.94224e+06	5.44799e+06	4.85654e+06	8.21345e+06	804186		1.06412e+07	1.13265e+07	28.59	4.39466e+06	4.89939e+06	52.59	2.42	1.28	0.0010878	2.96	0.0513787	1.99454	312.225	782.7	13	Up
M313T104	82279	112223	89414.3	98573.2	109469	112522	77782	100625	44799.8	51771.7	50416	42609.8	40034.4	65969.7	64205.8	82156.9		97860.9	99599.1	13.83	55245.5	51093.8	26.1	1.77	0.82	0.0003108	3.51	0.040447	2.38108	313.151	104.2	1.7	Up
M313T304	203471	291725	280795	269402	124361	341642	236925	281102	103252	25810	89054.6	20171.5	99772	150809	117445	137653		253678	275098	26	92996.1	101512	51.28	2.73	1.45	0.000621601	3.21	0.0444681	2.05862	313.089	303.8	5.1	Up
M313T574	175256	770135	244806	284507	758679	762434	1.06936e+06	1.3206e+06	1.62153e+06	1.13295e+06	2.12456e+06	1.10986e+06	1.90013e+06	405940	2.96396e+06	1.43173e+06		673222	760557	61.07	1.58633e+06	1.52663e+06	48.46	0.42	-1.24	0.00699301	2.16	0.1064	1.7034	313.118	573.7	9.6	Down
M314T303	588677	878081	709406	819674	685141	717691	815913	761576	35410.1	724597	20817.7	42098.9	36492.3	386493	121270	435134		747020	739634	12.25	225289	81684.6	115.9	3.32	1.73	0.0018648	2.73	0.0601903	2.04504	313.997	302.6	5	Up
M315T115	293967	607869	650275	291398	131006	344717	160133	1.10376e+06	98999.2	287104	75513	29880.7	141678	89719.1	603264	96640.3		447891	319342	72.53	177850	97819.8	105.66	2.52	1.33	0.0104118	1.98	0.130233	1.56569	315.179	115.5	1.9	Up
M315T417	173326	131616	146675	201804	165616	148960	152862	182285	45331	105555	109049	36414.3	137206	153491	158917	113591		162893	159239	13.81	107444	111320	42.51	1.52	0.6	0.014763	1.83	0.158002	1.52672	315.095	417.3	7	Up
M315T761	880748	1.0635e+06	1.79916e+06	1.10701e+06	398772	957968	669586	924224	3.34842e+06	474553	2.22276e+06	2.07754e+06	1.85046e+06	1.07779e+06	1.12453e+06	1.48584e+06		975122	941096	41.41	1.70774e+06	1.66815e+06	51.53	0.57	-0.81	0.0281274	1.55	0.216677	1.23228	314.988	760.7	12.7	Down
M315T780	376730	157372	249140	116289	932486	109296	210493	152390	911624	2.13179e+06	2.59634e+06	749495	940454	85056.9	685518	764279		288025	183933	95.32	1.10807e+06	837951	74.74	0.26	-1.94	0.0379176	1.42	0.250052	1.89351	315.147	780.2	13	Down
M315T804	5.48901e+06	3.71435e+06	8.59975e+06	3.03895e+06	4.89992e+06	3.1542e+06	788415	4.16481e+06	1.04728e+07	8.85325e+06	1.41079e+07	1.34231e+07	8.55925e+06	1.69701e+06	5.03241e+06	1.1434e+07		4.23118e+06	3.93958e+06	53.46	9.19747e+06	9.66302e+06	45.53	0.46	-1.12	0.0206682	1.68	0.184282	1.54218	315.253	803.9	13.4	Down
M315T81	4.2717e+06	4.46198e+06	4.69523e+06	4.30863e+06	3.79711e+06	4.89288e+06	5.20255e+06	5.62085e+06	3.39948e+06	983493	940858	4.66657e+06	3.11567e+06	3.73102e+06	2.94179e+06	3.2693e+06		4.65637e+06	4.57861e+06	12.39	2.88102e+06	3.19248e+06	44.98	1.62	0.69	0.0018648	2.73	0.0601903	1.81565	315.095	80.7	1.3	Up
M315T92	95039.5	131543	50077	43575.2	104595	189955	119119	34388.6	738805	185301	686251	383284	497879	151461	133007	130715		96036.6	99817.1	54.75	363338	284293	69.59	0.26	-1.92	0.0029526	2.53	0.0725285	1.98365	315.167	92.1	1.5	Down
M315T95	318782	1.11739e+06	275202	380035	474705	266817	279747	486152	326093	1.24841e+06	888065	787237	816192	377054	546876	691579		449854	349408	63.02	710189	739408	42.04	0.63	-0.66	0.0498834	1.3	0.285686	1.41633	315.05	95.2	1.6	Down
M315T96	449064	415071	367060	434997	399061	622776	338419	507279	333312	392931	385650	322152	424056	352736	361291	340516		441716	425034	20.24	364081	357014	9.45	1.21	0.28	0.0281274	1.55	0.216677	1.54704	315.033	95.9	1.6	Up
M316T33	185868	235307	239536	167626	163798	221995	208616	205087	281318	215817	265578	339137	256628	243772	256950	228911		203479	206851	14.21	261014	256789	14.44	0.78	-0.36	0.0029526	2.53	0.0725285	1.85775	315.833	33.5	0.6	Down
M316T372	517656	214031	329427	184470	137578	140809	122661	580395	695632	597170	1.12247e+06	389182	821308	147020	337888	293936		278378	199251	64.69	550576	493176	58.4	0.51	-0.98	0.0379176	1.42	0.250052	1.51899	316.101	372.2	6.2	Down
M316T408	19245.1	29426.6	15151.6	13834.8	40275.2	11072.3	22672.6	16431.8	18420.2	32417.1	85217.6	73136.1	38079.7	32545.2	21692.4	28884		21013.8	17838.5	45.98	41299	32481.2	59.1	0.51	-0.97	0.0379176	1.42	0.250052	1.60879	316.122	407.6	6.8	Down
M316T426	51672.7	56652.5	75107.2	39784.4	37377.5	55131.9	57196.4	56021.3	82034.7	66903.2	118764	91465.9	65097.3	64048.8	47099.9	63547.9		53618	55576.6	21.74	74870.2	66000.2	29.56	0.72	-0.48	0.0206682	1.68	0.184282	1.57985	316.049	426.3	7.1	Down
M316T652	69940.9	190154	90049.7	109639	130077	76681.6	101710	124022	63870.8	64997.5	65282.5	56249.7	56172.5	104918	143205	82177.9		111534	105675	34.2	79609.3	65140	38.14	1.4	0.49	0.0498834	1.3	0.285686	1.41264	316.122	651.7	10.9	Up
M317T126_1	147034	409773	443858	520531	281767	399530	348630	483638	219995	192967	205274	305132	241002	346484	296070	291764		379345	404651	31.62	262336	266383	20.99	1.45	0.53	0.0379176	1.42	0.250052	1.52962	317.02	125.6	2.1	Up
M317T126_2	160447	193923	153835	177625	155623	164680	203330	181877	157272	124726	150580	124756	147442	146478	149236	168657		173918	171153	10.53	146143	148339	10.27	1.19	0.25	0.004662	2.33	0.0886941	1.89694	317.045	126.3	2.1	Up
M318T350	78217	60880.1	71804.9	95092.4	96064.6	76562.6	66291.5	78079.5	102816	82002.4	124251	141761	91203.6	110118	60328.4	98425.2		77874.1	77321.1	16.02	101363	100621	24.75	0.77	-0.38	0.0379176	1.42	0.250052	1.37191	318.117	349.8	5.8	Down
M318T355	68222.2	31002.6	29350	8662.55	71298.1	10706.8	37161.2	36619.8	156876	83389.4	401874	136725	170308	12890.6	84666.6	79373		36627.9	33811.2	63.1	140763	110696	83.15	0.26	-1.94	0.004662	2.33	0.0886941	1.82179	318.065	355.4	5.9	Down
M318T413	85124.2	147876	154165	152966	44699	171756	135847	122137	11594.5	38395.4	103819	21936.6	18630.9	21973	43803.5	145725		126821	141861	33.29	50734.7	30184.2	95	2.5	1.32	0.004662	2.33	0.0886941	1.87521	317.89	413.5	6.9	Up
M318T66	7915.23	8839.73	10358.4	9500.5	7903.53	9981.32	9280.29	10091.8	1394.17	8572.67	2197.09	2141.09	2101.18	9496.75	2091.84	2260.31		9233.85	9390.4	10.27	3781.89	2169.09	86.27	2.44	1.29	0.004662	2.33	0.0886941	2.19915	317.513	66	1.1	Up
M318T84	1.90368e+06	1.79409e+06	1.3675e+06	1.50913e+06	1.3284e+06	1.4216e+06	1.32524e+06	1.1167e+06	1.84405e+06	2.00521e+07	2.22285e+06	7.79418e+06	2.11072e+06	1.49887e+06	7.21784e+07	2.08229e+06		1.47079e+06	1.39455e+06	17.68	1.37229e+07	2.16679e+06	178.19	0.11	-3.22	0.0018648	2.73	0.0601903	1.59174	317.939	84	1.4	Down
M319T117	1.68121e+06	2.01793e+06	1.54953e+06	1.86694e+06	1.53768e+06	2.17782e+06	2.37309e+06	1.96994e+06	4492.95	1.69211e+06	6554.79	287528	247374	1.07709e+06	1.31249e+06	1.03242e+06		1.89677e+06	1.91844e+06	15.73	707509	659975	91.78	2.68	1.42	0.0010878	2.96	0.0513787	1.60883	319.072	117	2	Up
M319T149	769085	508081	645758	820608	729975	736446	570427	610670	422360	546096	532840	540125	452676	683531	682451	368626		673881	687866	15.93	528588	536482	21.54	1.27	0.35	0.0281274	1.55	0.216677	1.64136	319.027	148.6	2.5	Up
M319T466	118396	112403	113643	50855.3	123037	133218	125750	107164	96396.3	309831	348074	172033	269693	193669	232947	125475		110558	116019	23.06	218515	213308	40.31	0.51	-0.98	0.014763	1.83	0.158002	1.96827	319.133	465.6	7.8	Down
M319T598	47572.7	182612	160889	89005	50243.3	199094	126958	201007	184974	230593	235700	250819	208801	175247	239785	242407		132172	143923	48.15	221041	233146	12.74	0.6	-0.74	0.0029526	2.53	0.0725285	1.68373	319.176	597.6	10	Down
M320T149	127485	134748	157564	131835	127450	114187	126132	150580	138837	144994	138023	147546	155032	185607	210337	179787		133748	129660	10.48	162520	151289	16.22	0.82	-0.28	0.014763	1.83	0.158002	1.73393	320.044	148.6	2.5	Down
M320T738	139042	129871	217735	267901	74533.5	160727	483940	158370	423184	323444	272412	430795	347482	187238	370369	491411		204015	159548	62.3	355792	358926	27.14	0.57	-0.8	0.014763	1.83	0.158002	1.73069	320.153	738.2	12.3	Down
M320T813	3.13223e+06	2.45864e+06	1.83251e+06	1.94808e+06	2.7096e+06	3.39547e+06	2.46238e+06	3.1277e+06	3.72552e+06	2.60174e+06	4.13029e+06	3.4465e+06	4.27139e+06	2.80758e+06	2.87184e+06	3.6159e+06		2.63333e+06	2.58599e+06	21.53	3.43385e+06	3.5312e+06	18.1	0.77	-0.38	0.0206682	1.68	0.184282	1.65105	320.161	812.6	13.5	Down
M321T354	54234.7	10153.8	49719.2	63067.3	107089	15413.9	43802.7	55209.5	78787.9	78045.2	107584	87043.9	61661.3	78810.9	76650	60051		49836.3	51976.9	60.18	78579.3	78416.6	18.92	0.63	-0.66	0.014763	1.83	0.158002	1.5542	321.173	354.1	5.9	Down
M321T415	40702.8	27940	20370.4	34897.4	42298.1	24650.5	5392.03	13895.9	10591.7	11413.7	13144.9	17055.2	11155.9	14094.4	24567.3	6986.85		26268.4	26295.2	49.19	13626.2	12279.3	38.85	1.93	0.95	0.0379176	1.42	0.250052	1.34601	321.058	414.9	6.9	Up
M321T591	129804	102294	86457.2	389841	86561	87943.5	91147.7	128279	881406	52238.9	910172	1.07008e+06	746198	99110.6	193083	560800		137791	96720.7	75.05	564137	653499	71.08	0.24	-2.03	0.0498834	1.3	0.285686	1.53012	321.135	590.7	9.8	Down
M321T74	940216	1.39919e+06	1.22265e+06	1.38839e+06	1.05095e+06	1.15543e+06	779757	916089	912385	726071	826696	435383	588365	554640	490829	879076		1.10658e+06	1.10319e+06	20.34	676681	657218	27.19	1.64	0.71	0.0010878	2.96	0.0513787	2.0554	320.956	74	1.2	Up
M321T98	357181	411181	379520	281672	346635	342006	326115	313036	636938	426617	760208	712947	700170	305231	407383	523842		344668	344321	11.56	559167	580390	29.95	0.62	-0.7	0.0104118	1.98	0.130233	1.99295	321.075	97.8	1.6	Down
M322T298	107106	95995.1	123416	96840.4	89308.4	107651	111481	69662.4	63316.3	64741.9	71032.6	81643	41514.6	97456.9	94098.9	92440.2		100182	101973	16.23	75780.6	76337.8	25.39	1.32	0.4	0.0206682	1.68	0.184282	1.58574	322.06	298.3	5	Up
M322T431	282508	603277	511780	349075	228128	520761	334342	472467	160957	234030	62542.4	113933	94345.5	195255	161991	192940		412792	410771	32.06	151999	161474	37.9	2.72	1.44	0.0003108	3.51	0.040447	2.33249	322.096	431.4	7.2	Up
M322T545	279188	227465	198927	221253	85307.1	226194	285713	282271	142018	22793.5	93044.2	171811	158633	174061	123447	103024		225790	226830	29.05	123604	132732	40.98	1.83	0.87	0.00699301	2.16	0.1064	1.69266	322.046	545.2	9.1	Up
M322T69	2.57042e+06	3.91784e+06	3.42495e+06	1.55839e+06	2.46288e+06	2.23496e+06	2.12801e+06	2.37037e+06	1.97575e+06	1.1743e+06	1.62309e+06	1.99946e+06	2.02233e+06	1.74768e+06	1.67073e+06	1.00181e+06		2.58348e+06	2.41663e+06	29	1.65189e+06	1.70921e+06	23.15	1.56	0.65	0.004662	2.33	0.0886941	1.87811	322.023	69.3	1.2	Up
M322T93	393671	235199	1.58771e+06	270678	261676	73364.2	1.65052e+06	1.80249e+06	1.98137e+06	1.4163e+06	4.11572e+06	2.46567e+06	452438	1.77292e+06	1.99793e+06	270033		784413	332175	95.51	1.80905e+06	1.87714e+06	66.67	0.43	-1.21	0.0379176	1.42	0.250052	1.38069	322.114	93.3	1.6	Down
M323T334	56035.9	56538.8	56064.8	58221.4	46277.6	50204.6	47301.9	54901.8	35314.1	36932.7	44195.6	32629.7	26576.7	37474.2	50061.5	52140.8		53193.3	55468.9	8.62	39415.7	37203.5	22.2	1.35	0.43	0.0029526	2.53	0.0725285	1.93149	323.099	334.2	5.6	Up
M323T574	51897.8	46983.5	39189.8	35165.1	105888	67912.3	66617.3	85630.5	47595.8	46383.7	31101.1	32158.4	59531	42628.6	15589.9	41728.8		62410.6	59257.6	38.81	39589.7	42178.7	33.41	1.58	0.66	0.0498834	1.3	0.285686	1.48612	323.078	573.7	9.6	Up
M324T374_1	5.07408e+06	3.13966e+06	7.67154e+06	3.14652e+06	3.4985e+06	3.14444e+06	3.48108e+06	4.24543e+06	6.55783e+06	3.61995e+06	1.07029e+07	8.00139e+06	6.22312e+06	4.85742e+06	4.37678e+06	6.41235e+06		4.17516e+06	3.48979e+06	37.51	6.34397e+06	6.31774e+06	35.4	0.66	-0.6	0.0206682	1.68	0.184282	1.62099	323.904	374.2	6.2	Down
M324T374_2	4.06967e+06	4.59741e+06	4.36127e+06	5.90096e+06	3.44339e+06	3.8942e+06	3.89689e+06	2.66771e+06	2.21808e+06	2.12187e+06	1.64467e+06	1.57406e+06	1.97708e+06	5.26557e+06	3.86097e+06	3.84168e+06		4.10394e+06	3.98328e+06	22.8	2.813e+06	2.16997e+06	47.7	1.46	0.54	0.0281274	1.55	0.216677	1.59393	324.021	374	6.2	Up
M325T316	749972	1.30348e+06	1.30869e+06	1.03628e+06	690259	1.08985e+06	1.24925e+06	1.17107e+06	14048.3	750824	19220.6	26137.5	93441.4	908396	699339	815129		1.07486e+06	1.13046e+06	22.29	415817	396390	98.29	2.58	1.37	0.00699301	2.16	0.1064	1.71674	325.079	315.7	5.3	Up
M325T374_1	73290.2	35258.8	658890	907044	455802	35084	930221	395014	1.75129e+06	1.18821e+06	2.14854e+06	1.9007e+06	1.43444e+06	68608.5	1.1848e+06	1.59707e+06		436325	425408	85.35	1.40921e+06	1.51576e+06	45.18	0.31	-1.69	0.004662	2.33	0.0886941	1.55724	324.908	374.2	6.2	Down
M325T401	144332	101722	161470	183405	56553.6	137020	133403	264453	22543.6	95338.6	147188	133828	120399	98511.8	10281.4	96475.5		147795	140676	41.11	90570.7	97493.7	54.67	1.63	0.71	0.0498834	1.3	0.285686	1.30846	325.05	401.1	6.7	Up
M325T584	236871	60106.4	698460	438984	353350	183992	297359	790169	345313	1.24993e+06	1.2975e+06	934116	2.16468e+06	1.06605e+06	1.97954e+06	51152.5		382411	325354	65.7	1.13604e+06	1.15799e+06	63.62	0.34	-1.57	0.0379176	1.42	0.250052	1.21872	324.993	584	9.7	Down
M325T652	795356	293703	869046	599177	751673	1.48089e+06	857503	710349	1.51639e+06	909503	1.58368e+06	1.76228e+06	1.57734e+06	329197	1.52839e+06	779903		794712	773515	41.96	1.24833e+06	1.52239e+06	40.78	0.64	-0.65	0.0379176	1.42	0.250052	1.17459	325.204	652.4	10.9	Down
M325T696	263435	803489	475953	367355	553309	427159	414660	444975	2.05506e+06	969295	1.714e+06	2.03312e+06	1.77822e+06	956605	1.16574e+06	467089		468792	436067	33.91	1.39239e+06	1.43987e+06	41.86	0.34	-1.57	0.0010878	2.96	0.0513787	2.1861	325.202	696.5	11.6	Down
M325T711	1.36945e+06	1.05201e+06	1.18403e+06	1.96189e+06	1.15047e+06	982182	698699	1.23642e+06	460414	502905	149375	163505	408236	720430	1.12406e+06	518106		1.20439e+06	1.16725e+06	30.32	505879	481659	61.8	2.38	1.25	0.0018648	2.73	0.0601903	2.00332	325.202	711.5	11.9	Up
M325T792	989470	454381	879880	650667	840961	812782	853894	629415	4.42616e+06	1.44526e+06	7.28002e+06	1.43142e+06	1.92018e+06	619874	1.9882e+06	980547		763931	826872	22.54	2.51146e+06	1.68272e+06	89.36	0.3	-1.72	0.0104118	1.98	0.130233	1.92331	325.201	791.6	13.2	Down
M325T82_1	1.75749e+06	3.10036e+06	2.51697e+06	1.92137e+06	1.32712e+06	4.87853e+06	3.3423e+06	3.16378e+06	2.02824e+06	1.44005e+06	2.08344e+06	254161	198342	1.81508e+06	1.35402e+06	1.48303e+06		2.75099e+06	2.80866e+06	41.05	1.33204e+06	1.46154e+06	55.05	2.07	1.05	0.0281274	1.55	0.216677	1.53577	324.76	82.4	1.4	Up
M325T84_2	6.20295e+06	6.01387e+06	7.2337e+06	6.72218e+06	7.10328e+06	5.63303e+06	7.37974e+06	5.80518e+06	362988	6.10108e+06	399619	534929	242940	6.1198e+06	6.51989e+06	4.9535e+06		6.51174e+06	6.46256e+06	10.52	3.15434e+06	2.74421e+06	94.92	2.06	1.05	0.0206682	1.68	0.184282	1.64721	325.013	83.9	1.4	Up
M325T90_3	697810	858310	765310	768713	728597	599877	755982	755385	743787	834660	801689	781720	784576	803498	778760	824619		741248	755684	9.87	794164	793133	3.6	0.93	-0.1	0.0379176	1.42	0.250052	1.29269	325.142	90	1.5	Down
M326T162	1.65503e+06	2.71594e+06	3.32583e+06	2.19996e+06	2.25102e+06	3.33938e+06	4.96182e+06	3.86628e+06	5.77784e+06	4.85977e+06	5.82012e+06	5.05558e+06	3.59721e+06	5.63559e+06	2.1116e+06	6.43996e+06		3.03941e+06	3.02089e+06	34.95	4.91221e+06	5.34558e+06	28.82	0.62	-0.69	0.0206682	1.68	0.184282	1.59197	326.11	162	2.7	Down
M326T240	1.34205e+06	978670	1.48458e+06	957105	1.58873e+06	839180	871871	908710	1.88798e+06	1.65624e+06	2.5907e+06	2.17254e+06	1.60803e+06	1.06476e+06	1.60306e+06	1.65031e+06		1.12136e+06	967887	26.83	1.7792e+06	1.65328e+06	25.38	0.63	-0.67	0.0010878	2.96	0.0513787	2.06022	326.111	240	4	Down
M326T327	4.6128e+06	1.13062e+07	9.9616e+06	8.45774e+06	4.5427e+06	1.33243e+07	1.169e+07	9.27901e+06	7.64408e+06	4.27127e+06	3.75572e+06	7.20675e+06	4.29989e+06	6.60986e+06	9.51398e+06	8.73861e+06		9.14679e+06	9.62031e+06	34.94	6.50502e+06	6.90831e+06	33.51	1.41	0.49	0.0498834	1.3	0.285686	1.29585	326.124	327.4	5.5	Up
M326T597	45534	432549	58291.6	108324	413344	350744	338059	305246	242595	586002	536338	628716	690661	259264	658391	462222		256511	321652	62.38	508024	561170	34.24	0.5	-0.99	0.0206682	1.68	0.184282	1.5372	326.168	596.7	9.9	Down
M327T118	203904	800806	524746	367065	555354	537549	480314	514108	184528	507535	301339	186763	272347	176037	132266	395210		497981	519427	34.07	269503	229555	47.58	1.85	0.89	0.00699301	2.16	0.1064	1.76057	327.121	117.7	2	Up
M327T158	909826	3.93032e+06	3.21247e+06	641450	3.64556e+06	4.94244e+06	526570	1.06061e+06	9.28524e+06	1.10286e+06	1.00022e+07	1.20426e+07	1.01443e+07	3.74506e+06	4.93774e+06	4.34646e+06		2.35866e+06	2.13654e+06	74.51	6.9508e+06	7.11149e+06	56.04	0.34	-1.56	0.0104118	1.98	0.130233	1.64657	327.022	158.1	2.6	Down
M327T323	324186	659209	487446	594343	18979	467863	425092	439494	237876	47717.9	180668	180387	365981	266902	38543.1	242416		427077	453678	45.51	195061	209272	56.52	2.19	1.13	0.014763	1.83	0.158002	1.12724	327.094	322.5	5.4	Up
M327T327	1.58512e+06	1.82135e+06	1.79268e+06	2.00962e+06	1.81012e+06	2.35269e+06	1.68695e+06	1.74094e+06	1.40907e+06	1.78847e+06	1.16916e+06	1.21508e+06	915903	975075	1.34229e+06	1.38224e+06		1.84993e+06	1801401	12.8	1.27466e+06	1.27868e+06	21.61	1.45	0.54	0.0010878	2.96	0.0513787	2.14337	327.128	327.3	5.5	Up
M327T720	88950	291094	167356	76315	54697.3	105125	134645	136543	307386	181159	212993	201748	114254	175961	223011	329463		131841	119885	56.06	218247	207370	32.22	0.6	-0.73	0.014763	1.83	0.158002	1.63907	327.153	719.6	12	Down
M327T741_1	2.20951e+06	1.44982e+06	1.45995e+06	1.65796e+06	1.37486e+06	1.43402e+06	1.09156e+06	1.49085e+06	236747	751383	916032	437819	1.16501e+06	987278	1.49582e+06	200667		1.52106e+06	1.45488e+06	21.02	773844	833707	59.23	1.97	0.97	0.00699301	2.16	0.1064	1.80356	327.215	741.2	12.4	Up
M328T32	72851	71791.3	73798.4	71532.3	78054.6	81014.5	78822.3	78520.3	87882.5	86721.4	92931.4	89434	73841.4	80051.9	81014.4	79780.6		75798.1	75926.5	4.88	83957.2	83867.9	7.5	0.9	-0.15	0.00699301	2.16	0.1064	1.82821	327.824	32.3	0.5	Down
M328T320	121424	127515	108941	141789	122795	155053	157828	125362	26562.5	122095	34848.6	27493.7	33695.3	86058.7	92974.8	81660.4		132588	126439	13.01	63173.6	58254.5	58.35	2.1	1.07	0.000621601	3.21	0.0444681	2.02002	328.045	320	5.3	Up
M328T344	842875	735604	1.01339e+06	885397	903236	1.26998e+06	1.31763e+06	1.25878e+06	596202	873391	647640	667636	686352	839956	581591	691381		1.02836e+06	958313	21.79	698019	676994	15.17	1.47	0.56	0.0010878	2.96	0.0513787	2.11348	327.89	344.4	5.7	Up
M328T612	102616	52455.3	255390	80788.4	86521.1	62888.3	58264.9	57946	138651	92078.3	103906	264908	111530	109230	58622.1	153790		94608.7	71838.4	71.04	129090	110380	47.95	0.73	-0.45	0.0379176	1.42	0.250052	1.06391	328.22	611.9	10.2	Down
M329T117	72370.4	62534.2	77992.7	40501.7	44652.6	56231.3	47732.4	49325.1	85950.2	132547	82716.2	95145.9	85263.5	80881.1	86560.9	112817		56417.6	52778.2	23.92	95235.3	86255.5	19.14	0.59	-0.76	0.0001554	3.81	0.0365579	2.3759	329.06	116.9	1.9	Down
M329T363	279819	243189	246310	281227	185640	314290	317699	277575	150138	275910	377062	468544	407879	383048	418907	416635		268219	278697	16	362265	395464	28.12	0.74	-0.43	0.0498834	1.3	0.285686	1.18179	328.954	363.5	6.1	Down
M329T691	761413	932865	1.1726e+06	1.47143e+06	1.23644e+06	1.23504e+06	1.53505e+06	626523	1.51335e+06	1.53536e+06	1.39309e+06	2.00997e+06	1.97413e+06	1.29842e+06	1.54265e+06	1.23947e+06		1.12142e+06	1.20382e+06	28.84	1.56331e+06	1.52435e+06	18.35	0.72	-0.48	0.00699301	2.16	0.1064	1.62891	329.232	690.9	11.5	Down
M329T762	333434	93545.2	2.00418e+06	362520	163286	774788	167423	224367	1.80151e+06	225190	2.25541e+06	2.06699e+06	1.64844e+06	1.12011e+06	387754	1.56918e+06		515442	278901	123.75	1.38432e+06	1.60881e+06	53.98	0.37	-1.43	0.0206682	1.68	0.184282	1.62008	328.986	761.6	12.7	Down
M329T87	5.13892e+06	3.22282e+06	5.4138e+06	3.86711e+06	3.25463e+06	4.29e+06	3.90891e+06	4.75534e+06	7.54006e+06	8.61934e+06	8.78056e+06	5.7105e+06	3.27173e+06	5.49668e+06	4.40652e+06	5.29421e+06		4.23144e+06	4.09946e+06	19.38	6.13995e+06	5.60359e+06	32.35	0.69	-0.54	0.0206682	1.68	0.184282	1.62355	329.086	87.2	1.5	Down
M331T364	160746	141872	210027	223928	128206	80949.1	283169	197422	358227	331995	505408	393714	285815	422009	480908	278447		178290	179084	35.52	382065	375970	22.07	0.47	-1.1	0.0003108	3.51	0.040447	2.27908	330.952	363.6	6.1	Down
M331T674	3.93574e+06	2.1794e+06	1.41594e+06	1.66887e+06	1.66398e+06	2.40584e+06	983078	2.05786e+06	2.41535e+06	4.6148e+06	3.54097e+06	4.42286e+06	9.10674e+06	3.69898e+06	2.49994e+06	4.84524e+06		2.03884e+06	1.86336e+06	43.61	4.39311e+06	4.06092e+06	48.04	0.46	-1.11	0.0018648	2.73	0.0601903	1.99661	330.979	674	11.2	Down
M332T374	134969	297816	295148	289813	728625	263767	1.2707e+06	306406	916128	1.22353e+06	1.08634e+06	1.4924e+06	1.01998e+06	1.28986e+06	792567	589425		448405	296482	83.38	1.05128e+06	1.05316e+06	27.43	0.43	-1.23	0.00699301	2.16	0.1064	2.01269	331.899	374.2	6.2	Down
M332T73_1	592558	435368	459995	442391	432032	427074	480580	414229	446498	432113	563462	615943	478215	602855	661728	470765		460528	438879	12.41	533947	520838	16.42	0.86	-0.21	0.0498834	1.3	0.285686	1.35033	332.021	73.3	1.2	Down
M333T149	1.43204e+06	1.40332e+06	1.50822e+06	1.33778e+06	704441	1.40074e+06	1.11502e+06	1.02971e+06	207939	926904	183696	207205	217200	938941	925801	692867		1.24141e+06	1.36926e+06	21.9	537569	455034	67.92	2.31	1.21	0.0010878	2.96	0.0513787	1.94631	333.1	148.6	2.5	Up
M333T304	342652	308031	307167	326800	308728	315409	255713	233450	346592	241026	522018	377871	343895	387071	432343	438109		299744	308380	12.2	386116	382471	21.4	0.78	-0.37	0.00699301	2.16	0.1064	1.62676	333.076	303.7	5.1	Down
M333T433	296385	400548	304008	422795	407635	501538	659531	645478	116246	256908	343015	216846	46968.8	215259	258715	254023		454740	415215	30.48	213498	235434	43.2	2.13	1.09	0.000621601	3.21	0.0444681	1.91105	333.062	433	7.2	Up
M333T74	2.50677e+06	767636	667418	498061	808427	826547	1.78461e+06	992148	153184	791427	246365	754029	182831	1.00729e+06	432025	316737		1.10645e+06	817487	61.85	485486	374381	66.45	2.28	1.19	0.0281274	1.55	0.216677	1.71922	332.986	73.6	1.2	Up
M334T108	167928	131488	157097	158625	126854	155153	158454	148368	166861	147522	161843	183338	162667	180501	172921	156912		150496	156125	9.47	166571	164764	7.21	0.9	-0.15	0.0498834	1.3	0.285686	1.45057	334.089	107.5	1.8	Down
M334T531	377772	270251	282610	244661	407744	545721	421630	424766	792077	758901	721994	446977	877966	390234	436785	871305		371894	392758	27.14	662030	740447	30.81	0.56	-0.83	0.004662	2.33	0.0886941	2.05988	334.111	530.7	8.8	Down
M334T598	292129	345367	414513	824052	772351	693837	629652	1.14055e+06	209570	568268	129843	92953	233035	297980	430163	179332		639056	661745	44.4	267643	221303	59.84	2.39	1.26	0.00699301	2.16	0.1064	1.91424	334.189	597.6	10	Up
M334T72	372577	223517	228637	171215	205581	95280.9	107479	149573	120288	174963	234549	377829	311804	380376	649115	244748		194232	188398	45.14	311709	278276	52.67	0.62	-0.68	0.0498834	1.3	0.285686	1.28299	334	72	1.2	Down
M334T84_2	2.1452e+06	1.0204e+06	1.64007e+06	1.20113e+06	1.30657e+06	1.24674e+06	1.81358e+06	1.68789e+06	515490	1.46063e+06	722744	446198	602969	1.36025e+06	1.30707e+06	860006		1.5077e+06	1.47332e+06	24.94	909420	791375	44.88	1.66	0.73	0.0379176	1.42	0.250052	1.68623	333.927	83.8	1.4	Up
M334T98_1	1.80581e+07	2.65925e+07	2.3735e+07	1.5479e+07	1.63605e+07	1.73081e+07	1.34892e+07	3.72115e+07	7.40037e+06	1.56576e+07	1.34869e+07	1.10671e+07	1.25933e+07	1.83864e+07	1.03142e+07	2.23762e+07		2.10292e+07	1.76831e+07	37.37	1.39103e+07	1.30401e+07	34.38	1.51	0.6	0.0379176	1.42	0.250052	1.53271	334.045	98.4	1.6	Up
M334T98_2	1.17277e+06	2.81154e+06	1.74128e+06	992323	2.05575e+06	1.28782e+06	1.91781e+06	2.73224e+06	986530	625733	1.21759e+06	1.14046e+06	1.31316e+06	993462	860966	602294		1.83894e+06	1.82955e+06	37.17	967524	989996	26.91	1.9	0.93	0.00699301	2.16	0.1064	2.01693	334.075	97.8	1.6	Up
M335T380	499078	565577	505430	631383	367837	607796	709954	936270	54065	408150	224249	394244	264000	532224	369205	642254		602916	586687	28.06	361049	381724	50.65	1.67	0.74	0.0379176	1.42	0.250052	1.5279	335.125	380.2	6.3	Up
M335T437	27293.9	55120.4	8916	67342	53072.4	64418.3	2890.1	43012.7	25385	4060.52	4335.56	6078.76	3137.98	665.397	2315.35	7065.03		40258.2	48042.6	61.25	6630.45	4198.04	118.27	6.07	2.6	0.00699301	2.16	0.1064	1.95795	335.072	437.2	7.3	Up
M335T531	74500	43791.4	90329.3	93225.2	78175.3	76544.2	67230.2	77447.1	52705.2	48340.3	65361.1	92699.3	29982.4	19843.8	38580	21724.7		75155.3	76995.7	20.24	46154.6	43460.2	53.01	1.63	0.7	0.0206682	1.68	0.184282	1.73359	335.115	530.6	8.8	Up
M335T739	3.74579e+06	4.11686e+06	6.22956e+06	1.10524e+07	5.1484e+06	1.28246e+07	2.43575e+07	1.44317e+07	3.91018e+06	6.4637e+06	4.92997e+06	1.06135e+06	3.3927e+06	3.07162e+06	1.1165e+07	594721		1.02384e+07	8.64099e+06	68.66	4.32365e+06	3651438	77.65	2.37	1.24	0.0379176	1.42	0.250052	1.51368	335.223	739.2	12.3	Up
M335T780	343736	323727	653941	206820	376321	504115	557237	558266	663818	841759	780608	446046	768377	596394	797566	369821		440520	440218	34.19	658049	716098	26.46	0.67	-0.58	0.0206682	1.68	0.184282	1.64545	335.286	779.6	13	Down
M336T739	895740	1.02636e+06	1.40267e+06	1.78364e+06	1.12189e+06	3.1934e+06	5.95795e+06	3.29e+06	1.40323e+06	1.21959e+06	1.01225e+06	80946.8	214012	513684	2.50027e+06	257438		2.33396e+06	1.59316e+06	74.57	900176	762965	90.37	2.59	1.37	0.0498834	1.3	0.285686	1.53355	336.226	739.2	12.3	Up
M336T792	2.64782e+06	2.29117e+06	341163	273792	3.49291e+06	1.43548e+07	1.67068e+06	1.3973e+07	7.28163e+06	6.41894e+07	4.24063e+07	1.39149e+07	1.44794e+07	1.83011e+06	3.14646e+07	3.51956e+06		4.88067e+06	2.46949e+06	119.52	2.23857e+07	1.41972e+07	98.04	0.22	-2.2	0.0281274	1.55	0.216677	1.66795	336.225	791.7	13.2	Down
M336T85	1.49653e+06	1.75313e+06	1.9209e+06	2.12367e+06	1.94083e+06	1.57258e+06	2.19121e+06	2.08078e+06	2.60853e+06	1.36256e+06	3.8288e+06	2.5512e+06	2.33555e+06	2.66205e+06	2.13292e+06	1.97257e+06		1.88495e+06	1.93086e+06	13.59	2.43177e+06	2.44337e+06	29.09	0.78	-0.37	0.0379176	1.42	0.250052	1.23299	335.955	85	1.4	Down
M336T93	1.39695e+06	1.79255e+06	1.16674e+06	1.88836e+06	1.53447e+06	1.92154e+06	1.96574e+06	1.72175e+06	2660.74	1.32669e+06	2256.54	1803.01	1282.88	947885	1.00677e+06	885327		1.67351e+06	1.75715e+06	16.93	521834	443994	109.31	3.21	1.68	0.0003108	3.51	0.040447	1.73525	336.14	92.6	1.5	Up
M337T108	366321	379400	311815	373546	332419	357044	328071	430381	325807	239788	316838	311395	261772	278558	265073	238070		359875	361683	10.32	279663	271816	12.37	1.29	0.36	0.000621601	3.21	0.0444681	2.26164	337.081	108.2	1.8	Up
M337T508	78088.9	77515.7	90068.7	110458	68020.6	226426	159095	100189	81584.3	191683	284526	147594	251513	217604	215131	241593		113733	95128.6	47.21	203904	216368	31.45	0.56	-0.84	0.0206682	1.68	0.184282	1.76012	337.085	507.7	8.5	Down
M337T687	103741	142659	112570	77600.7	113749	204436	198857	73018.8	784094	285834	1.02736e+06	888278	855969	113898	136499	146021		128329	113160	39.15	529744	534964	74.2	0.24	-2.05	0.0104118	1.98	0.130233	1.79539	336.898	686.5	11.4	Down
M337T801	4.96791e+06	1.14093e+07	3.31825e+06	3.7562e+06	1.51494e+07	3.63306e+06	1.53428e+06	1.54845e+06	2.37261e+06	795039	2.30333e+06	1.02173e+07	988518	903049	665916	933866		5.66459e+06	3.69463e+06	87.18	2.39745e+06	961192	134.78	2.36	1.24	0.0206682	1.68	0.184282	1.57736	337.238	800.8	13.3	Up
M337T92	363559	416933	520992	316888	384400	1.73183e+06	1.09613e+06	1.3316e+06	2.13071e+06	2.64176e+06	2.53997e+06	4.55966e+06	2.56111e+06	411351	382489	1.72729e+06		770292	468963	70.3	2.11929e+06	2.33534e+06	63.53	0.36	-1.46	0.0379176	1.42	0.250052	1.47333	337.056	91.7	1.5	Down
M338T148	295151	251500	483356	230716	212869	219360	372712	234755	7082.16	193446	8758.72	4747.54	6803.55	338647	199624	200799		287552	243128	33.04	119989	101102	107.88	2.4	1.26	0.004662	2.33	0.0886941	1.6691	338.087	148	2.5	Up
M338T283	363543	149098	250720	802489	163867	280845	200610	306368	950916	259885	741675	687444	687399	431636	218242	1.04186e+06		314693	265783	66.75	627382	687421	48.1	0.5	-1	0.0498834	1.3	0.285686	1.51969	338.055	283.1	4.7	Down
M338T344	23486.1	7916.05	113000	7449.68	5067.74	24105.6	89252	139492	126539	89721.1	306629	142512	226567	113461	214844	182077		51221.1	23795.8	105.6	175294	162295	40.96	0.29	-1.77	0.0018648	2.73	0.0601903	2.03084	337.919	344.3	5.7	Down
M339T233	254488	219562	258944	238427	144923	227277	215270	206498	290514	161888	342116	302970	367624	273989	260064	231811		220674	223420	16.19	278872	282251	23.03	0.79	-0.34	0.0206682	1.68	0.184282	1.26677	339.068	233.1	3.9	Down
M339T544	46834.9	42156.2	28292.4	27912.8	14933.7	29310.9	40668.1	21659.9	52785.5	38716.1	51011	60549	23930.3	34842.7	42909.1	56591.1		31471.1	28801.7	34.64	45166.9	46960.1	27.29	0.7	-0.52	0.0498834	1.3	0.285686	1.45245	339.181	544.2	9.1	Down
M340T146	195279	246071	264677	286394	294279	306937	291461	275379	212266	167922	236147	238117	327101	193195	183253	200686		270060	280887	13.2	219836	206476	22.6	1.23	0.3	0.0379176	1.42	0.250052	1.64768	340.054	146.5	2.4	Up
M340T417	143548	108718	70426.1	146797	163637	98628.6	69684.5	64195.6	28068.9	46285.5	15742.3	66181.9	15102.8	39803	72388	18433.2		108204	103673	36.22	37750.7	33935.9	59.65	2.87	1.52	0.0018648	2.73	0.0601903	2.20773	340.116	417.4	7	Up
M340T89	2.45045e+06	1.13253e+06	723933	370228	3.62069e+06	3.86546e+06	2.38544e+06	3.06112e+06	4.59509e+06	1.19741e+07	7.57521e+06	811935	5.23289e+06	470830	6.4315e+06	5.2907e+06		2.20123e+06	2.41795e+06	60.21	5.29779e+06	5.26179e+06	69.52	0.42	-1.27	0.0498834	1.3	0.285686	1.22854	340.01	89.1	1.5	Down
M340T90	420570	536408	530497	601103	444690	614281	533567	600597	343996	482808	319378	308450	322120	385506	357274	412201		535214	534988	13.44	366467	350635	16.02	1.46	0.55	0.000621601	3.21	0.0444681	2.32876	340.088	89.8	1.5	Up
M340T91	769861	996645	914486	709965	131250	855729	830136	729600	14828.7	551638	24433.5	23647.7	211467	564756	500349	410308		742209	799998	35.66	287679	310888	85.75	2.58	1.37	0.0029526	2.53	0.0725285	1.57354	340.114	90.8	1.5	Up
M341T147	71792.2	99721.5	65745.5	97016.7	13923.3	102204	82116.9	86766.5	16283.3	50632.3	48427.4	53005.3	57355	49720.9	51005.2	14660.6		77410.9	84441.7	37.2	42636.2	50176.6	39.83	1.82	0.86	0.0104118	1.98	0.130233	1.3685	341.218	146.6	2.4	Up
M341T293	466127	384001	187890	486607	502749	250828	202107	111454	132666	144413	122197	199184	118635	152478	196356	108169		323970	317414	47.55	146762	138539	23.5	2.21	1.14	0.014763	1.83	0.158002	1.8782	341.095	292.7	4.9	Up
M341T306_1	494351	1.27364e+06	994508	460707	1.24152e+06	826550	698662	668540	1.13285e+06	1.13084e+06	2.12265e+06	1.87408e+06	1.51145e+06	1.2207e+06	1.08834e+06	2.04208e+06		832311	762606	37.6	1.51537e+06	1.36607e+06	28.85	0.55	-0.86	0.0104118	1.98	0.130233	1.9956	341.073	306.4	5.1	Down
M341T370	356352	316250	226140	427287	695267	180031	78757.2	331411	50943.8	174796	186174	133601	111259	13168.5	140855	11529.1		326437	323831	56.73	102791	122430	67.46	3.18	1.67	0.004662	2.33	0.0886941	1.72909	341.044	370.2	6.2	Up
M341T374	128080	213121	126399	149221	227825	170661	165525	195197	236666	288437	323119	204037	320103	196502	248949	262649		172004	168093	21.88	260058	255799	18.52	0.66	-0.6	0.0018648	2.73	0.0601903	2.13358	341.08	373.7	6.2	Down
M341T542	77881.5	52034.6	63146.2	124183	77502	39490.3	61879.6	54842.9	38342.8	9121.61	6324.2	53628	8704.17	73447.9	74893.8	9748.88		68870	62512.9	37.38	34276.4	24045.8	87.14	2.01	1.01	0.0379176	1.42	0.250052	1.77991	341.159	541.7	9	Up
M341T69_1	7.88403e+06	8.88589e+06	7.62401e+06	8.02602e+06	7.66459e+06	6.65258e+06	9.72354e+06	6.78969e+06	7.0592e+06	6.71692e+06	6.37408e+06	9.49158e+06	5.24779e+06	6.9181e+06	4.77332e+06	6.54675e+06		7.90629e+06	7.77431e+06	12.86	6.64097e+06	6.63183e+06	21.21	1.19	0.25	0.0379176	1.42	0.250052	1.52317	340.991	69.4	1.2	Up
M341T84_1	39070.2	46419.6	48044.5	36087.5	27466	195400	43945.5	39474.9	4.40233e+06	4.75804e+06	4.27406e+06	8.21931e+06	4.1716e+06	4.1222e+06	4.04483e+06	4.77224e+06		59488.6	41710.2	92.96	4.84558e+06	4.3382e+06	28.7	0.01	-6.35	0.0001554	3.81	0.0365579	2.76798	340.862	83.7	1.4	Down
M342T319	31839	47493	114545	68414.1	37165.7	41200	14562.8	15982.7	117593	109365	177875	138281	101165	74184.3	95500.9	31097.5		46400.3	39182.8	70.04	105633	105265	40.97	0.44	-1.19	0.0206682	1.68	0.184282	1.77125	342.105	319.1	5.3	Down
M342T329	46144.7	29766	21193.2	19101.9	4625.75	11491.2	23521.3	11571	55999	43633.6	44441.8	39571.8	41907.4	28393	21835.1	46440.8		20926.9	20147.5	61.69	40277.8	42770.5	26.51	0.52	-0.94	0.014763	1.83	0.158002	1.80313	342.105	329	5.5	Down
M342T338	29831	19016.1	34910.8	4997.26	24492.4	21542.7	20354.3	5830.95	57973.2	24994.3	51832.3	44253.9	47292	27192.5	23162.3	54026.9		20121.9	20948.5	52.07	41340.9	45773	34.08	0.49	-1.04	0.00699301	2.16	0.1064	1.83341	342.166	338.1	5.6	Down
M342T713	292636	172518	313380	432368	148311	458383	313464	123608	71206.3	214809	36394	36775.6	220537	166472	276622	165200		281834	303008	44.63	148502	165836	61.1	1.9	0.92	0.0498834	1.3	0.285686	1.44761	342.137	713.4	11.9	Up
M342T72	628756	711408	735582	618704	85983.8	635460	651608	747599	119048	116220	527394	374836	61295.3	588670	119207	322336		601888	643534	35.63	278626	220772	73.51	2.16	1.11	0.00699301	2.16	0.1064	1.56923	341.97	71.7	1.2	Up
M342T89	151017	329479	311814	383038	371003	524877	397998	348660	391136	392424	764604	548608	787160	415129	427760	382533		352236	359831	29.55	513669	421445	33.15	0.69	-0.54	0.014763	1.83	0.158002	1.38597	342.139	88.6	1.5	Down
M343T443	21913	4453.27	43441	38815.5	39789.2	5810.1	6819.74	6514.55	17818.8	117777	81734.1	48614.7	9512.24	9023.02	59606.4	68360.8		20944.5	14366.4	82.51	51555.8	54110.5	74.64	0.41	-1.3	0.0379176	1.42	0.250052	1.39837	343.175	443.3	7.4	Down
M343T751	767202	423905	189280	463916	331541	376285	631380	695781	1.26606e+06	515838	876448	676522	1.07834e+06	806095	902913	331289		484912	443911	40.69	806687	841272	37.09	0.6	-0.73	0.0379176	1.42	0.250052	1.47924	343.212	751.1	12.5	Down
M344T69	3.74821e+06	3.35092e+06	3.2375e+06	4.68636e+06	3.82096e+06	2.87948e+06	3.87142e+06	3.30763e+06	2.66736e+06	2.01214e+06	3.18167e+06	3.33309e+06	2.54944e+06	3.55578e+06	3.27002e+06	2.30412e+06		3.61281e+06	3.54957e+06	15.24	2.8592e+06	2.92451e+06	19.34	1.26	0.34	0.0206682	1.68	0.184282	1.75616	344.027	68.7	1.1	Up
M345T630	6.90108e+06	6.0868e+06	6.28692e+06	8.3634e+06	1.16846e+07	7.31252e+06	6.82346e+06	6.98523e+06	6.42096e+06	5.19811e+06	5.2451e+06	6.08567e+06	5.79594e+06	5.71182e+06	4.89156e+06	3.65994e+06		7.5555e+06	6.94315e+06	23.9	5.37614e+06	5.47846e+06	15.9	1.41	0.49	0.000621601	3.21	0.0444681	1.97432	344.978	629.7	10.5	Up
M346T342	739202	584590	948772	724874	658313	847558	1.03927e+06	1.17362e+06	296466	828849	251495	239093	348877	706487	552731	351337		839525	793380	24.02	446917	350107	49.83	1.88	0.91	0.004662	2.33	0.0886941	1.98676	346.061	342.1	5.7	Up
M346T361	1.24311e+06	1.30415e+06	1.34956e+06	1.51286e+06	1.12485e+06	1.3842e+06	1.37522e+06	1.48382e+06	1.16918e+06	1.19848e+06	1.25991e+06	1.07928e+06	989912	1.20169e+06	1.31882e+06	1.14377e+06		1.34722e+06	1.36239e+06	9.32	1.17013e+06	1.18383e+06	8.75	1.15	0.2	0.014763	1.83	0.158002	1.81109	346.061	361.2	6	Up
M347T516	30581.8	85438.9	27040.5	36947.3	70049.6	82437.6	65170.3	45662.7	93483.4	85783.3	102935	121297	144526	38147.2	59354.7	109270		55416.1	55416.5	42.04	94349.8	98209.4	35.83	0.59	-0.77	0.014763	1.83	0.158002	1.53605	347.069	516	8.6	Down
M347T567	247165	308618	192979	268139	144247	212955	320806	204135	209552	136352	187389	183210	190305	177445	152527	209205		237381	230060	25.39	180748	185299	14.12	1.31	0.39	0.0281274	1.55	0.216677	1.57292	347.242	567.2	9.5	Up
M347T760_1	439919	435762	563036	476601	838456	708243	809754	1.01418e+06	2.39786e+06	1.58016e+06	978054	1.73423e+06	783055	442877	742223	1.3593e+06		660743	635639	32.55	1.25222e+06	1.16868e+06	51.17	0.53	-0.92	0.0498834	1.3	0.285686	1.57889	346.994	760.2	12.7	Down
M347T98	2.77812e+08	2.90681e+08	2.86304e+08	2.45615e+08	3.09212e+08	2.99623e+08	2.65787e+08	2.57575e+08	7.82909e+08	3.40763e+08	7.64323e+08	5.84806e+08	8.65589e+08	2.99734e+08	1.89274e+08	4.10581e+08		2.79076e+08	2.82058e+08	7.75	5.29747e+08	4.97694e+08	48.06	0.53	-0.92	0.014763	1.83	0.158002	1.64165	347.038	98.4	1.6	Down
M348T120	2.20366e+06	2.68425e+06	2.40961e+06	3.30618e+06	3.09276e+06	2.47909e+06	2.70587e+06	3.1044e+06	2.53386e+06	1.75779e+06	2.14944e+06	2.36778e+06	2.49873e+06	2.53898e+06	2.06013e+06	2.49167e+06		2.74823e+06	2.69506e+06	14.07	2.2998e+06	2.42972e+06	12.37	1.19	0.26	0.0498834	1.3	0.285686	1.75266	348.059	120.2	2	Up
M348T314	75683.2	61899.6	69423.5	76073.3	80012.3	40424.8	82627.8	52603.1	109936	85057	142592	88257	82227.5	33872.9	176153	86025.7		67343.5	72553.4	21.85	100515	87141.4	42.8	0.67	-0.58	0.014763	1.83	0.158002	1.32393	348.053	314	5.2	Down
M349T118	366709	490585	380681	559924	456032	588194	577817	478002	136705	374890	163948	132658	107184	275789	266493	231740		487243	484294	17.45	211176	197844	43.55	2.31	1.21	0.0003108	3.51	0.040447	2.32069	349.081	118	2	Up
M349T724	170699	382704	131884	186874	355938	334691	251303	273289	134529	191342	116703	89592.5	23040.3	94760.9	110169	85836.2		260923	262296	35.43	105747	102465	45.09	2.47	1.3	0.0018648	2.73	0.0601903	2.00218	349.168	723.6	12.1	Up
M349T758	2.20739e+06	2.39174e+06	2.13601e+06	2.88486e+06	2.08953e+06	1.89879e+06	2.24092e+06	2.13585e+06	1.8294e+06	1.11648e+06	2.02588e+06	1.84056e+06	1.81685e+06	2.53408e+06	1.63093e+06	1.46172e+06		2.24814e+06	2.1717e+06	13.02	1.78199e+06	1.82313e+06	23.24	1.26	0.34	0.0104118	1.98	0.130233	1.7527	349.202	758	12.6	Up
M349T98	2.32312e+07	2.88119e+07	1.8323e+07	2.74846e+07	1.84426e+07	2.66437e+07	3.54292e+07	3.29561e+07	8.75183e+06	6.96041e+06	8.51704e+06	4.8227e+06	9.39083e+06	1.41405e+07	1.85292e+07	6.55609e+06		2.64153e+07	2.70641e+07	23.52	9.70857e+06	8.63443e+06	46.27	2.72	1.44	0.000621601	3.21	0.0444681	2.42216	349.043	98.4	1.6	Up
M350T404	72871.1	94558.6	35372.5	68948.8	213654	145345	153237	127116	84290.8	44085.5	87013.3	31353.3	48060.9	35848.2	38655.8	32340.9		113888	110837	50.23	50206.1	41370.7	45	2.27	1.18	0.0206682	1.68	0.184282	1.79233	350.085	404.3	6.7	Up
M350T758	194552	470689	179764	273546	267229	263583	424426	476078	78869.9	170714	314237	160407	178320	266319	215175	164808		318733	270388	37.78	193606	174517	37.12	1.65	0.72	0.0206682	1.68	0.184282	1.63156	350.205	758	12.6	Up
M350T811	53672.9	337182	365208	285740	314707	915345	159866	316340	960571	67377.2	1.384e+06	1.96794e+06	1.90798e+06	772271	376161	500253		343507	315523	73.82	992070	866421	70.97	0.35	-1.53	0.0206682	1.68	0.184282	1.1393	350.208	811.5	13.5	Down
M351T666	213899	138005	118639	248491	322694	261488	280490	332253	68293.6	292860	34870.3	25350.4	54870	43501	116525	113795		239495	254990	32.85	93758.2	61581.8	93.15	2.55	1.35	0.004662	2.33	0.0886941	1.93116	350.985	666	11.1	Up
M352T305	631959	480482	516940	758066	1.08105e+06	466107	784095	741038	1.05285e+06	1.11012e+06	1.72501e+06	994970	887832	954365	1.15228e+06	943453		682466	686498	30.13	1.10261e+06	1.02391e+06	24.18	0.62	-0.69	0.0029526	2.53	0.0725285	2.11473	352.07	305.3	5.1	Down
M352T373	175269	38586.9	127430	54715.1	130958	161014	122028	18890	14456.7	33852	8556.77	148903	18215.5	43405	35935.5	15317.6		103611	124729	56.37	39830.2	26033.8	114.86	2.6	1.38	0.0206682	1.68	0.184282	1.68677	352.142	373.1	6.2	Up
M352T658	19304.8	23883.6	23469.5	17915.7	30539.7	13202.9	26213	20101.9	97858.4	76180.7	171275	84092.9	82928.7	19519.5	42699.9	61786.3		21828.9	21785.7	24.55	79542.7	79554.7	56.36	0.27	-1.87	0.0029526	2.53	0.0725285	2.29424	352.142	657.7	11	Down
M352T665	252430	70726.5	151586	167555	154916	128081	136722	158436	87415.6	67587	90039.8	92353.3	78314.5	127271	93431.4	104437		152557	153251	33.04	92606.2	91196.6	19.17	1.65	0.72	0.00699301	2.16	0.1064	1.83612	352.168	664.7	11.1	Up
M352T717	671420	357605	326401	1.25555e+06	1.32116e+06	360355	423860	1.50316e+06	1.91005e+06	810839	1.38849e+06	1.23559e+06	2.2459e+06	809780	1.52412e+06	2.52373e+06		777439	547640	64.14	1.55606e+06	1.45631e+06	40.51	0.5	-1	0.0206682	1.68	0.184282	1.75033	352.219	716.6	11.9	Down
M352T734	8.11238e+06	4.89563e+06	3.02532e+06	6.24676e+06	3.84247e+06	2.97982e+06	7.76973e+06	5.10607e+06	1.50494e+06	2.22815e+06	2.01824e+06	2.11708e+06	1.49836e+06	2.74759e+06	4.45821e+06	3.03626e+06		5.24727e+06	5.00085e+06	37.96	2.4511e+06	2.17262e+06	39.65	2.14	1.1	0.0029526	2.53	0.0725285	2.03553	351.9	733.8	12.2	Up
M352T768_1	1.63665e+06	2.10324e+06	1.81356e+06	1.69089e+06	741356	2.79728e+06	1.04182e+06	2.25754e+06	2.68017e+06	4.691e+06	3.69312e+06	2.25768e+06	2.36149e+06	1.17118e+06	2.8519e+06	3.21497e+06		1.76029e+06	1.75223e+06	37.3	2.86519e+06	2.76603e+06	36.53	0.61	-0.7	0.014763	1.83	0.158002	1.55458	351.648	768.2	12.8	Down
M353T634	953135	878849	1.48562e+06	1.00351e+06	851461	1.10318e+06	1.78096e+06	1.15755e+06	1.80201e+06	979300	2.656e+06	2.85826e+06	1.95482e+06	1.75855e+06	1.38362e+06	1.27961e+06		1.15178e+06	1053344	28.15	1.83402e+06	1.78028e+06	35.62	0.63	-0.67	0.0206682	1.68	0.184282	1.61267	353.233	634.1	10.6	Down
M353T656	2.76667e+06	4.1261e+06	6.29841e+06	2.36359e+06	5.04014e+06	2.39857e+06	1.03212e+06	2.38362e+06	156637	1.15509e+06	3.80629e+06	2.05692e+06	1.62103e+06	1.84092e+06	2.25533e+06	1.07791e+06		3.30115e+06	2.58262e+06	52.04	1.74626e+06	1.73097e+06	61.02	1.89	0.92	0.0281274	1.55	0.216677	1.3015	353.233	655.9	10.9	Up
M353T799_1	1.71614e+07	2.92765e+07	1.09856e+07	1.02611e+07	7.14546e+06	1.09622e+07	4.02245e+06	8.38084e+06	2.28198e+07	2.93151e+07	3.32583e+07	1.12459e+07	9.06811e+06	1.684e+07	1.95304e+07	1.7508e+07		1.22744e+07	1.06117e+07	63.85	1.99482e+07	1.85192e+07	41.64	0.62	-0.7	0.0379176	1.42	0.250052	1.4889	353.199	799	13.3	Down
M354T122_1	898289	877718	1.11702e+06	335606	86321	1.01151e+06	716534	996597	1.59351e+06	645830	2.35171e+06	2.42606e+06	1.52743e+06	1.45889e+06	1.34729e+06	1.76801e+06		754949	888004	47.9	1.63984e+06	1.56047e+06	34.67	0.46	-1.12	0.004662	2.33	0.0886941	1.62214	354.05	121.7	2	Down
M354T364_2	175835	115661	144006	144885	180613	152734	188916	138182	219803	237196	218638	169820	180550	218442	208330	214786		155104	148810	15.98	208446	216614	10.68	0.74	-0.43	0.0029526	2.53	0.0725285	2.25092	354.076	364.1	6.1	Down
M354T71	112232	131192	135062	130437	129569	133224	97462.5	125929	233350	127307	138122	166531	138399	140802	113972	249608		124389	130003	10.42	163512	139601	30.89	0.76	-0.39	0.0281274	1.55	0.216677	1.4121	353.971	71.3	1.2	Down
M354T716	7.292e+06	8.8832e+06	7.44619e+06	8.53973e+06	8.33228e+06	7.96473e+06	7.68742e+06	7.4816e+06	6.92162e+06	6.69642e+06	5.66521e+06	4.60749e+06	6.71104e+06	5.37881e+06	4.93942e+06	8.25022e+06		7.95339e+06	7.82608e+06	7.27	6.14628e+06	6.18082e+06	19.73	1.29	0.37	0.0029526	2.53	0.0725285	1.94075	354.236	715.7	11.9	Up
M354T88	4.05032e+06	1.58545e+06	3.13165e+06	2.21799e+06	1.99069e+06	1.75397e+06	3.89922e+06	2.27935e+06	4.04916e+06	2.843e+06	6.36932e+06	4.60702e+06	2.37549e+06	5.21276e+06	4.45619e+06	3.611e+06		2.61358e+06	2.24867e+06	36.69	4.19049e+06	4.25267e+06	30.59	0.62	-0.68	0.014763	1.83	0.158002	1.77315	354.047	87.7	1.5	Down
M355T100	295359	292349	296989	306637	250664	333578	288776	273395	251684	243326	245561	261485	254464	270744	237576	213484		292218	293854	8.23	247290	248623	6.97	1.18	0.24	0.0018648	2.73	0.0601903	2.23967	355.08	100.1	1.7	Up
M355T356	223406	260883	253258	320984	161652	201405	358491	144794	126196	106786	108069	180150	89385.8	157324	70699	137929		240609	238332	30.69	122067	117133	29.41	1.97	0.98	0.0010878	2.96	0.0513787	2.23973	355.097	356.4	5.9	Up
M355T466	156145	197372	215739	170882	216531	39157.2	101183	183509	216215	250777	260817	288960	265421	122956	129432	234702		160065	177195	38.4	221160	242740	28.22	0.72	-0.47	0.0498834	1.3	0.285686	1.19944	355.109	465.6	7.8	Down
M355T621	310493	320848	299351	279387	457207	419282	288938	366038	283024	150575	283626	285179	268926	328864	142294	338443		342693	315670	19.04	260116	283325	28.52	1.32	0.4	0.0498834	1.3	0.285686	1.54478	355.239	620.6	10.3	Up
M355T676	1.04666e+06	412474	856117	368374	177544	337854	130779	943319	1.37093e+06	1.1343e+06	2.81529e+06	1.705e+06	1.77057e+06	512868	1.49501e+06	996272		534140	390424	67.3	1.47503e+06	1.43297e+06	45.97	0.36	-1.47	0.0018648	2.73	0.0601903	2.00394	355.238	676	11.3	Down
M355T70	167226	148200	183193	168961	145854	237100	204192	382751	205085	215579	1.03513e+06	232727	243851	309375	371798	239399		204684	176077	38.09	356619	241625	78.42	0.57	-0.8	0.0206682	1.68	0.184282	1.37033	355.049	70.3	1.2	Down
M355T740	297468	183164	166578	194228	167069	65370.8	130176	149533	47062.7	52275	35881	73748.7	47586.4	175114	222791	16752.9		169198	166823	38.68	83901.4	49930.7	88.05	2.02	1.01	0.0498834	1.3	0.285686	1.72591	355.26	739.7	12.3	Up
M356T146	12891.3	51775	57412.2	47811.4	47341.1	53348.5	53258.7	44890.1	31902	29076.1	29696.6	39905.9	34470.6	37008.9	31111	22490.4		46091	49793.2	30.38	31957.7	31506.5	16.67	1.44	0.53	0.0104118	1.98	0.130233	1.30261	356.073	146.4	2.4	Up
M356T624	169523	166022	150538	203333	70154.7	170579	166001	188865	44406.7	75452.1	125169	141779	109177	106366	151484	136578		160627	167773	24.84	111301	117173	32.51	1.44	0.53	0.0104118	1.98	0.130233	1.4442	356.251	624	10.4	Up
M356T66	47697.9	111098	54545.3	68728.8	66336.1	31620.9	40788.3	37403.2	19335.4	46309.7	27814.7	34031.4	30451.6	36605.2	19185.9	96748.4		57277.4	51121.6	44.43	38810.3	32241.5	64.57	1.48	0.56	0.0379176	1.42	0.250052	1.28926	355.529	66.5	1.1	Up
M356T809	424924	1.05631e+06	1.51774e+06	2.10881e+06	1.37992e+06	2.08209e+06	1.30949e+06	1.02688e+06	592852	639551	1.02145e+06	707832	684061	792566	693465	392251		1.36327e+06	1.34471e+06	41.01	690503	688763	25.75	1.97	0.98	0.00699301	2.16	0.1064	1.88647	356.279	808.7	13.5	Up
M357T102	179146	15543.7	175728	31436.6	477155	35210.4	105042	42755.2	619080	291463	718674	346618	268355	27461.7	270124	305077		132752	73898.4	115.65	355857	298270	61.07	0.37	-1.42	0.0379176	1.42	0.250052	1.6624	357.141	102.3	1.7	Down
M357T413	32051.6	18057.3	15633.3	44844.5	43236	45722.4	74648.9	27527.3	53581.5	34259.8	116685	142860	76816.5	46557.6	46830.9	23352.4		37715.2	37643.8	50.3	67618	50206.2	61.99	0.56	-0.84	0.0498834	1.3	0.285686	1.1912	357.06	412.9	6.9	Down
M357T650	58962.4	1314.81	39794.1	3981.53	69146.2	3308.42	3283.59	26822.7	164013	77402.1	184237	449509	85236.3	6426.92	46426.7	151928		25826.7	15402.1	106.18	145647	118582	94.19	0.18	-2.5	0.004662	2.33	0.0886941	1.8403	356.978	649.8	10.8	Down
M357T75	2.1575e+06	2.60375e+06	2.53494e+06	2.45978e+06	1.81452e+06	2.87969e+06	2.51613e+06	2.69333e+06	2.70199e+06	3.03348e+06	2.61956e+06	3.67852e+06	2.81005e+06	2.52896e+06	2.54955e+06	2.74427e+06		2.45745e+06	2.52553e+06	13.48	2.8333e+06	2.72313e+06	13.33	0.87	-0.21	0.0379176	1.42	0.250052	1.26828	357.069	74.7	1.2	Down
M357T76	1.71264e+07	2.39541e+07	1.62315e+07	1.90536e+07	2.08487e+07	2.61232e+07	2.24967e+07	2.25295e+07	3.50755e+07	2.52214e+07	3.04962e+07	2.03079e+07	2.99157e+07	2.12439e+07	2.26715e+07	3.43616e+07		2.10455e+07	2.16727e+07	16.17	2.74117e+07	2.75686e+07	21.3	0.77	-0.38	0.0379176	1.42	0.250052	1.66506	356.987	75.9	1.3	Down
M357T78	1.93764e+08	2.19913e+08	2.44505e+08	2.55241e+08	1.61756e+08	1.83698e+08	1.4367e+08	1.87245e+08	1.14133e+08	1.41949e+08	1.62054e+08	1.48604e+08	1.51443e+08	1.69923e+08	7.11428e+07	2.03266e+08		1.98724e+08	1.90504e+08	19.51	1.45314e+08	1.50023e+08	27	1.37	0.45	0.0281274	1.55	0.216677	1.64278	357.001	77.5	1.3	Up
M357T81	174857	1.63532e+06	1.15284e+06	182873	732942	832421	632768	1.15309e+06	236926	284845	177001	208306	494028	125534	303747	244666		812139	782682	61.58	259382	240796	42.66	3.13	1.65	0.0498834	1.3	0.285686	1.75321	357.105	81	1.4	Up
M358T111	76987.9	93864.6	79223.6	145959	109805	111493	183254	182009	37282.6	119346	39992.1	28536.2	40588.2	77392.7	102972	60755.7		122825	110649	34.85	63358.2	50671.9	52.9	1.94	0.95	0.014763	1.83	0.158002	1.85462	358.219	111.3	1.9	Up
M358T314	354502	554936	723848	729069	734564	753505	534328	831511	438637	722629	424691	346162	638101	364777	426422	496456		652033	726459	24.06	482234	432529	27.48	1.35	0.44	0.0281274	1.55	0.216677	1.4502	358.082	314.1	5.2	Up
M358T465	27787.9	33502.7	33593.7	29684.2	28154.1	31587.8	28807.1	21773.9	60260.6	46630.6	64025.1	50324	17275.6	35917.6	31764	48335.2		29361.4	29245.6	13	44316.6	47482.9	34.74	0.66	-0.59	0.0206682	1.68	0.184282	1.46568	358.086	465.3	7.8	Down
M358T505	37671.3	22036.9	40079.7	19809.7	8236.04	23079.5	16291.9	29527	60937.4	42635.1	33238	19644.3	32864.8	32706.7	45404	39066.7		24591.5	22558.2	43.56	38312.1	36152.3	31.46	0.64	-0.64	0.0498834	1.3	0.285686	1.58412	358.124	504.7	8.4	Down
M358T82	708151	680893	835814	538718	597013	637338	504596	585480	937921	677131	1.51256e+06	800845	1.13227e+06	679183	1.02273e+06	1.00797e+06		636000	617175	16.59	971326	972946	28.19	0.65	-0.61	0.00699301	2.16	0.1064	2.06385	358.025	82	1.4	Down
M359T114	199171	141946	101204	123890	167876	89899.8	188696	160836	66735.6	161752	87112.4	39078.5	36020.8	115438	171424	85909		146690	151391	27.03	95433.7	86510.7	53.52	1.54	0.62	0.0498834	1.3	0.285686	1.365	359.193	113.7	1.9	Up
M359T379_2	246079	264334	164364	242963	223421	148122	345327	303042	173458	193452	106167	155302	234283	182519	65061.2	202648		242206	244521	27.08	164111	177988	33.33	1.48	0.56	0.0379176	1.42	0.250052	1.54931	359.135	378.9	6.3	Up
M359T533	96989.9	84592.8	62286.4	82320.6	52960.7	75678.9	43105.6	75144.4	84560.5	98922.8	82913	94566.2	97114.6	88388.9	92978.1	88040.3		71634.9	75411.7	24.77	90935.6	90683.5	6.43	0.79	-0.34	0.0104118	1.98	0.130233	1.65208	359.086	532.6	8.9	Down
M359T653	123073	86013	137222	117160	159427	131093	149561	161772	394490	322941	316027	251544	311003	93007.3	161338	206976		133165	134157	18.78	257166	281274	38.39	0.52	-0.95	0.0104118	1.98	0.130233	1.92664	359.207	653.3	10.9	Down
M360T152	434134	509992	525361	484451	453529	426793	471673	430423	613270	486761	513862	418809	529346	502399	600056	526097		467045	462601	8.01	523825	519980	11.81	0.89	-0.17	0.0498834	1.3	0.285686	1.50972	360.061	152.2	2.5	Down
M360T300	496085	657821	916805	635137	420569	874327	644242	694807	456271	466858	292282	270563	359553	559778	597281	588444		667474	651031	25.18	448879	461565	28.98	1.49	0.57	0.0104118	1.98	0.130233	1.71414	360.071	300.1	5	Up
M360T782_2	1.46496e+06	1.052e+06	2.62587e+06	668257	1.13783e+06	1.31248e+06	1.09082e+06	1.00791e+06	1.13275e+06	350258	426780	1.0825e+06	566502	1.12909e+06	728171	232081		1.29502e+06	1.11432e+06	45.23	706017	647337	52.23	1.83	0.88	0.0379176	1.42	0.250052	1.71127	360.155	782.3	13	Up
M361T107	179031	208370	241768	323784	151787	124740	326640	308231	511059	502852	665399	507276	378267	604402	586841	414019		233044	225069	34.24	521264	509167	18.43	0.45	-1.16	0.0001554	3.81	0.0365579	2.357	361.135	107	1.8	Down
M361T300	53818	23484.7	54619.3	30016.6	7840.72	26415.5	12873.6	12175.2	78559.5	25551.9	53714.2	60944.7	62869.8	28279.1	42074.4	61860.5		27655.5	24950.1	65.36	51731.8	57329.4	35.52	0.53	-0.9	0.0281274	1.55	0.216677	1.6653	361.072	300.2	5	Down
M361T587	115233	43617.6	98955.8	51612.8	98089.6	75341.1	67566.4	90944.5	164089	187585	535312	254610	435237	71575.7	121624	64441.1		80170.1	83142.8	31.11	229309	175837	74.87	0.35	-1.52	0.0281274	1.55	0.216677	1.77525	361.179	586.6	9.8	Down
M361T84	3.55938e+06	4.05108e+06	4.08345e+06	4.11249e+06	3.56827e+06	4.4978e+06	5.84476e+06	4.20027e+06	3.80824e+06	3.83393e+06	3.91169e+06	2.07269e+06	3.09077e+06	4.15074e+06	3.76495e+06	3.51398e+06		4.23969e+06	4.09797e+06	17	3.51837e+06	3.7866e+06	18.83	1.21	0.27	0.0498834	1.3	0.285686	1.28406	360.972	84.3	1.4	Up
M362T111	90791	103265	183951	136030	166356	156964	24108.9	141287	11291.8	115134	60524.6	89748.8	69673.1	93244	82944.8	87768.9		125344	138659	40.92	76291.3	85356.9	40.46	1.64	0.72	0.0206682	1.68	0.184282	1.05556	362.096	111.4	1.9	Up
M362T284	370887	521632	330958	537461	440973	462806	547318	915148	281445	399044	270347	199691	409319	432657	412779	392640		515898	492219	34.72	349740	395842	24.68	1.48	0.56	0.0206682	1.68	0.184282	1.61654	361.973	284.4	4.7	Up
M362T404	125689	35474.9	62277	46968.6	50134.1	19992.1	150619	29687.5	80220.8	51471.5	223534	109177	52876.1	159601	134496	81346.6		65105.3	48551.3	72.77	111590	95261.9	52.83	0.58	-0.78	0.0498834	1.3	0.285686	1.44354	361.964	403.8	6.7	Down
M362T69	311716	345844	251547	327986	272086	422289	425017	450322	136970	480146	203610	125621	225970	262639	334093	248624		350851	336915	21.18	252209	237297	45.24	1.39	0.48	0.0498834	1.3	0.285686	1.41063	362.083	68.7	1.1	Up
M363T747	2.27449e+06	3.10318e+06	3.75674e+06	5.34652e+06	4.6218e+06	5.1394e+06	1.34423e+06	5.70715e+06	1.49634e+06	3.77011e+06	1.36945e+06	530298	1.0918e+06	2.08953e+06	2.38193e+06	1.71347e+06		3.91169e+06	4.18927e+06	40.12	1.80537e+06	1.6049e+06	54.2	2.17	1.12	0.0206682	1.68	0.184282	1.7307	362.974	747.2	12.5	Up
M364T101	986198	721010	962581	1.34243e+06	1.11385e+06	688998	881388	998119	587434	402122	733716	237636	652073	1.07452e+06	752730	461240		961821	974389	21.84	612683	619754	41.73	1.57	0.65	0.0206682	1.68	0.184282	1.67938	364.08	100.9	1.7	Up
M364T94_1	1.03829e+07	1.17354e+07	1.01857e+07	1.42132e+07	8.9641e+06	8.05589e+06	8.4014e+06	1.37323e+07	8.3694e+06	4.04286e+06	5.49388e+06	1.0651e+07	5.34163e+06	9.57583e+06	7.5492e+06	2.88082e+06		1.07089e+07	1.02843e+07	21.83	6.73808e+06	6.52154e+06	40.58	1.59	0.67	0.014763	1.83	0.158002	1.90725	364.221	93.9	1.6	Up
M365T277	557138	285764	302186	324372	425507	116572	400039	280525	560320	602117	430917	541994	657819	649411	760120	590495		336513	313279	38.26	599149	596306	16.09	0.56	-0.83	0.000621601	3.21	0.0444681	2.08112	365.135	277	4.6	Down
M365T73	2.6242e+06	2.68635e+06	3.70536e+06	4.5278e+06	4.53973e+06	3.65402e+06	3.7021e+06	4.48503e+06	2.95869e+06	3.22517e+06	3.15589e+06	1.62561e+06	2.23851e+06	2.28761e+06	2.49282e+06	2.79244e+06		3.74057e+06	3.70373e+06	20.66	2.59709e+06	2.64263e+06	20.86	1.44	0.53	0.0104118	1.98	0.130233	1.7998	365.011	72.9	1.2	Up
M365T93_1	344460	513411	600772	312357	467221	506546	333184	461582	260173	496694	215158	224145	279819	164717	287452	495193		442442	464402	23.18	302919	269996	41.41	1.46	0.55	0.0206682	1.68	0.184282	1.52433	365.051	93	1.6	Up
M366T277	99066.2	43431.3	70268.3	64392.5	96023.3	108413	61315.1	74372.8	94902.5	121788	75461.1	108255	96522.3	96992.1	118580	103630		77160.4	72320.5	28.64	102016	100311	14.44	0.76	-0.4	0.0379176	1.42	0.250052	1.66372	366.138	277	4.6	Down
M366T94	584691	461223	624315	531197	635915	743009	575755	623309	822401	841831	1.03606e+06	711280	656112	578829	591676	716702		597427	604000	13.81	744361	713991	20.38	0.8	-0.32	0.0379176	1.42	0.250052	1.64688	366.235	93.9	1.6	Down
M367T146_2	147184	69471.5	98531.5	114369	72503.1	107386	107152	114633	49723.7	36630.9	43334.3	72500.6	59681.7	81317.2	79976.6	76286.7		103904	107269	23.91	62431.5	66091.1	28.12	1.66	0.73	0.00699301	2.16	0.1064	2.05365	367.092	146.4	2.4	Up
M367T289	90023.5	204584	64811.7	105539	131610	120033	164369	212062	207727	423310	167355	225689	306038	165939	120977	212009		136629	125821	38.8	228630	209868	41.79	0.6	-0.74	0.0206682	1.68	0.184282	1.57606	367.029	288.8	4.8	Down
M367T626	321968	630817	1.03531e+06	562679	776238	671901	161876	560274	1.07624e+06	1.0488e+06	1.53089e+06	1.52832e+06	1.11802e+06	420202	593751	700006		590133	596748	45.2	1.00203e+06	1.06252e+06	40.87	0.59	-0.76	0.0379176	1.42	0.250052	1.40498	367.212	626.3	10.4	Down
M367T652	169939	110467	119315	49971.1	43607.7	101246	170130	156251	181073	197123	191148	189635	185058	122152	50345.7	191468		115116	114891	43.2	163500	187346	31.57	0.7	-0.51	0.014763	1.83	0.158002	1.0938	367.086	652	10.9	Down
M367T775	41781	30624.3	47595.9	32010.5	246046	19554.9	111041	26909.3	926810	46896.8	1.16515e+06	877744	428724	90967	64547.7	115927		69445.3	36895.8	110.7	464595	272326	98.71	0.15	-2.74	0.0104118	1.98	0.130233	1.74764	367.19	775.2	12.9	Down
M367T91	348175	440836	300901	333050	350185	549170	348845	360945	230926	249737	333611	343746	204588	300568	285393	311052		379013	349515	20.92	282452	292980	17.61	1.34	0.42	0.0029526	2.53	0.0725285	1.88875	367.104	91.4	1.5	Up
M368T103	874664	391364	418824	1.55658e+06	819500	369152	321227	331018	765842	655705	3.13145e+06	1.64639e+06	519416	634656	1.42988e+06	2.23575e+06		635291	405094	68.05	1.37739e+06	1.09786e+06	67.61	0.46	-1.12	0.0498834	1.3	0.285686	1.56288	368.154	103	1.7	Down
M368T397	242476	277562	397190	282067	117673	222446	381119	256055	519252	269376	399671	323138	596552	419911	425241	348370		272073	266808	32.61	412689	409791	25.62	0.66	-0.6	0.0104118	1.98	0.130233	1.65257	368.12	396.7	6.6	Down
M368T75_2	1.08931e+07	8.27564e+06	7.18739e+06	3.49419e+06	5.38665e+06	8.87136e+06	9.23526e+06	5.12414e+06	3.62447e+06	3.24537e+06	5.22032e+06	5.07849e+06	4.66796e+06	4.78294e+06	4.48957e+06	4.34839e+06		7.30847e+06	7.73151e+06	33.9	4.43219e+06	4.57877e+06	15.46	1.65	0.72	0.0104118	1.98	0.130233	1.76903	368.034	74.8	1.2	Up
M369T118_2	1.03215e+06	996863	1.20558e+06	1.04556e+06	142005	1.01551e+06	929538	1.09081e+06	560305	225746	596013	413968	602440	513917	606830	579459		932252	1.02383e+06	35.3	512335	569882	25.84	1.82	0.86	0.0104118	1.98	0.130233	1.28406	369.163	117.5	2	Up
M369T374	250602	471544	174417	206804	808570	420234	421579	520228	261422	137612	371039	124119	215852	114748	141377	212605		409247	420907	50.35	197347	176991	44.4	2.07	1.05	0.0206682	1.68	0.184282	1.71571	369.075	373.7	6.2	Up
M369T537_1	1.36407e+07	1.09322e+07	1.53354e+07	1.21186e+07	1.17931e+07	1.20364e+07	1.14477e+07	1.01368e+07	9.50216e+06	6.68006e+06	9.16939e+06	1.14758e+07	1.20024e+07	1.26174e+07	1.01144e+07	8.96828e+06		1.21801e+07	1.19147e+07	13.36	1.00662e+07	9.80828e+06	19.16	1.21	0.28	0.0498834	1.3	0.285686	1.58003	369.216	537.2	9	Up
M369T631	220460	283092	174043	239116	93001.3	275033	149921	203997	159230	318972	474392	390392	250676	308266	327344	271019		204833	212229	31.39	312536	313619	30.01	0.66	-0.61	0.0206682	1.68	0.184282	1.51497	369.229	630.7	10.5	Down
M369T650	37180.9	679.013	65624.5	2053.96	33441.1	1710.27	1695.45	6809.08	129538	68734.3	156503	65203.7	100667	3348.48	22287.8	39406.7		18649.3	4431.52	129.48	73211.2	66969	72.21	0.25	-1.97	0.014763	1.83	0.158002	1.79658	369.275	649.9	10.8	Down
M369T653	348924	193023	385489	162615	270793	77473.5	190615	88716.3	557324	224349	632805	371012	198245	121351	545517	402838		214706	191819	52.46	381680	386925	49.26	0.56	-0.83	0.0498834	1.3	0.285686	1.47322	369.242	653.3	10.9	Down
M369T715	222899	197116	159061	217193	225062	220623	161845	200224	298428	231852	208998	231921	226486	245947	229012	229278		200503	208708	13.34	237740	230565	11.15	0.84	-0.25	0.0018648	2.73	0.0601903	1.6634	368.976	715.1	11.9	Down
M369T838	2.75556e+07	2.07028e+07	6.79405e+07	7.02955e+07	1.22816e+07	1.23086e+08	1.01605e+08	1.10459e+08	1.3874e+07	8.74465e+06	2.55229e+07	8.81875e+06	3.47288e+07	1.19833e+07	3.82169e+07	1.06062e+07		6.67409e+07	6.9118e+07	64.41	1.90619e+07	1.29287e+07	63.14	3.5	1.81	0.014763	1.83	0.158002	1.82742	369.158	837.9	14	Up
M370T108	1.0523e+06	620549	1.23199e+06	880102	1.04149e+06	913120	773107	1.11428e+06	1.33274e+06	1.13694e+06	1.31103e+06	1.25821e+06	1.33247e+06	1.09235e+06	921156	1.28438e+06		953368	977307	20.65	1.20866e+06	1.2713e+06	12.14	0.79	-0.34	0.00699301	2.16	0.1064	1.73483	370.044	107.9	1.8	Down
M370T151	1.06167e+07	1.05927e+07	8.24331e+06	1.40875e+07	1.24171e+07	1.76466e+07	6.29701e+06	1.10903e+07	1.76342e+07	1.16327e+07	2.42935e+07	1.20141e+07	1.40414e+07	1.3786e+07	1.50048e+07	1.7838e+07		1.13739e+07	1.08535e+07	30.57	1.57806e+07	1.45231e+07	26.14	0.72	-0.47	0.0379176	1.42	0.250052	1.54672	370.136	151.1	2.5	Down
M370T537	1.14469e+07	1.6442e+07	1.5144e+07	1.85215e+07	1.43855e+07	1.74376e+07	1.44626e+07	1.16242e+07	8.19933e+06	8.87149e+06	1.43743e+07	1.39316e+07	1.31193e+07	1.28154e+07	1.05709e+07	1.38573e+07		1.4933e+07	1.48033e+07	17	1.19674e+07	1.29674e+07	20.22	1.25	0.32	0.0206682	1.68	0.184282	1.59741	370.231	536.6	8.9	Up
M370T653	42640.2	82307.1	51548.3	66750.4	5084.52	71058.6	33650.4	42364.4	231503	34899.4	118251	115967	197382	66442.8	64862.8	93412.8		49425.5	47094.3	49.35	115340	104690	58.73	0.43	-1.22	0.0379176	1.42	0.250052	1.42987	370.244	653	10.9	Down
M370T73	8.13977e+06	5.99668e+06	5.20355e+06	7.22621e+06	2.76377e+06	7.06287e+06	4.8942e+06	6.16168e+06	2.89011e+06	1.66711e+06	3.72525e+06	4.55415e+06	3.78283e+06	3.30531e+06	2.80202e+06	3.16486e+06		5.93109e+06	6.07918e+06	28.16	3.23645e+06	3.23509e+06	26.26	1.83	0.87	0.00699301	2.16	0.1064	2.09682	370.054	72.6	1.2	Up
M370T88	2.52615e+06	1.80003e+06	3.42774e+06	2.67266e+06	1.45331e+06	7.37264e+06	1.82314e+06	2.31092e+06	1.03188e+07	1.93747e+06	6.8665e+06	5.34086e+06	1.1958e+07	4.85097e+06	2.75151e+06	7.43308e+06		2.92332e+06	2.41854e+06	65.01	6.43214e+06	6.10368e+06	53.94	0.45	-1.14	0.0206682	1.68	0.184282	1.60116	370.02	87.8	1.5	Down
M371T329	50612.5	51952.4	59700.8	64366.3	61782.6	59923.6	76759.1	66955.4	40654.6	59960.5	35558.5	39493.5	37808.3	42696.1	38113.7	44977.6		61506.6	60853.1	13.55	42407.9	40074.1	18.11	1.45	0.54	0.0018648	2.73	0.0601903	2.27767	371.144	329.3	5.5	Up
M371T381	86804.7	53983.8	100220	88979.6	6434.22	84689.8	46535.6	114653	54615.2	7455.13	42658.3	44510.3	38741.8	13157.7	24523.3	19050		72787.6	85747.2	48.02	30589	31632.6	55.15	2.38	1.25	0.0206682	1.68	0.184282	1.3893	371.054	381.2	6.4	Up
M371T394	155988	141928	95605.8	224102	130765	157672	141172	122579	54431.8	73245.4	75798.1	54545.7	80389.7	190936	151484	92276		146226	141550	25.45	96638.5	78093.9	50.57	1.51	0.6	0.0379176	1.42	0.250052	1.67786	371.104	393.7	6.6	Up
M371T428	33930.9	41629.1	28421.9	82340	64279.9	33566.5	30846.2	35696.6	7631.96	5344.48	47605.5	14314.5	8776.86	44498.1	12629.3	5085.15		43838.9	34813.8	43.81	18235.7	10703.1	95.88	2.4	1.27	0.0379176	1.42	0.250052	1.99676	371.23	427.7	7.1	Up
M371T534	212483	1.19523e+06	620053	164280	2.04702e+06	1.0614e+06	788110	1.99619e+06	186015	385691	263056	57213.6	159516	150627	179058	392513		1.0106e+06	924755	71.33	221711	182537	53.05	4.56	2.19	0.0104118	1.98	0.130233	1.8328	371.245	534.2	8.9	Up
M371T601	535204	327653	372862	463619	407690	426135	369155	488645	307801	497242	471217	579119	499451	627841	491312	541579		423870	416913	16.27	501945	498346	18.77	0.84	-0.24	0.0498834	1.3	0.285686	1.14614	371.129	601.1	10	Down
M371T83	392273	399765	388528	276566	273139	400750	333412	380102	430674	294350	807766	686735	569224	387088	534842	490572		355567	384315	15.24	525156	512707	31.41	0.68	-0.56	0.0206682	1.68	0.184282	1.68546	370.822	83.1	1.4	Down
M372T110_2	785983	584393	1.03188e+06	929585	1.55241e+06	1.02787e+06	1.27675e+06	1.17453e+06	1.88838e+06	2.16773e+06	2.49358e+06	1.59036e+06	1.29707e+06	1.42974e+06	1.28471e+06	2.08131e+06		1.04542e+06	1.02987e+06	28.49	1.77911e+06	1.73937e+06	25.13	0.59	-0.77	0.0010878	2.96	0.0513787	2.10755	372.117	109.9	1.8	Down
M372T393	18656.1	7347.22	25074.8	6664.82	17392.4	2083.9	10550	12857.8	104862	80890.2	244948	14202.5	14462.5	6966.16	181821	130108		12578.4	11703.9	59.56	97282.4	92875.9	88.83	0.13	-2.95	0.0379176	1.42	0.250052	1.95822	372.094	393.5	6.6	Down
M372T661	8208.68	9310.32	12444.8	1699.36	1128.78	5600.56	2846.74	4588.23	374529	1580.74	262724	472548	302091	41576.9	12338.6	108946		5728.43	5094.4	69.55	197042	185835	91.39	0.03	-5.1	0.0104118	1.98	0.130233	1.94469	371.905	661.3	11	Down
M372T74	714086	789173	596447	742504	768759	795319	870481	897425	121823	737601	141088	138623	147083	503188	575160	460321		771774	778966	12.13	353111	303702	69.21	2.19	1.13	0.000621601	3.21	0.0444681	1.95005	372.062	73.7	1.2	Up
M372T85	5.8096e+06	8.55433e+06	6.66894e+06	6.34812e+06	5.21756e+06	1.00261e+07	8.42201e+06	8.39327e+06	1.17732e+07	6.24555e+06	1.38388e+07	1.48651e+07	1.01956e+07	1.08413e+07	7.23098e+06	1.43373e+07		7.42999e+06	7.53111e+06	22.28	1.1166e+07	1.13072e+07	28.72	0.67	-0.59	0.0206682	1.68	0.184282	1.58073	371.995	84.9	1.4	Down
M373T389	69309.8	199584	75232.1	124785	156415	222695	189183	210905	38838.3	6903.51	93933.2	113848	40697.2	55904.7	23539.2	79430.7		156014	172799	38.67	56636.8	48301	64.44	2.75	1.46	0.004662	2.33	0.0886941	2.00748	373.157	389.4	6.5	Up
M373T71	189825	167832	206051	192169	152736	191546	144039	142238	274306	181630	294535	271563	350256	265887	195221	166131		173305	178829	14.32	249941	268725	25.33	0.69	-0.53	0.0206682	1.68	0.184282	1.79734	373.016	70.9	1.2	Down
M373T746	156240	212319	194563	430833	108706	515541	289295	408451	36409.7	329760	102970	49470.8	80214	127467	80035.4	117203		289494	250807	50.67	115441	91591.9	79.75	2.51	1.33	0.00699301	2.16	0.1064	1.89232	373.117	746	12.4	Up
M375T446_2	585188	639642	740220	1.25462e+06	621041	966313	985722	1.07199e+06	542108	577336	149755	131047	82466.2	499139	387807	464531		858092	853267	28.66	354274	426169	56.94	2.42	1.28	0.0001554	3.81	0.0365579	1.97964	375.143	446.2	7.4	Up
M375T613_2	128567	396719	336779	303457	320675	400883	291360	295600	85258.3	275590	116212	103392	133908	305343	326331	198553		309255	312066	27.36	193074	166231	50.4	1.6	0.68	0.0379176	1.42	0.250052	1.55625	375.195	612.9	10.2	Up
M375T94	4.77748e+06	7.87e+06	7.93824e+06	6.18676e+06	5.77763e+06	8.09788e+06	5.62886e+06	7.02945e+06	3.29617e+06	5.13338e+06	2.7305e+06	3.33345e+06	3.63904e+06	5.24167e+06	4.10045e+06	6.59406e+06		6.66329e+06	6.60811e+06	18.74	4.25859e+06	3.86975e+06	30.37	1.56	0.65	0.004662	2.33	0.0886941	2.03626	375.15	93.7	1.6	Up
M376T107	650771	516998	785933	569707	1.02838e+06	694848	381615	408830	898508	1.0195e+06	1.23788e+06	886778	691776	653670	726960	1.0436e+06		629636	610239	33.67	894833	892643	22.47	0.7	-0.51	0.0281274	1.55	0.216677	1.75128	376.087	107	1.8	Down
M376T369	57834	2598.83	4084.58	2022.78	4679.36	2441.03	2818.73	43989.2	225208	29465.1	137986	408920	114187	64276	69993.6	14810.9		15058.6	3451.65	149.11	133106	92090.3	97.71	0.11	-3.14	0.0018648	2.73	0.0601903	2.15098	376.151	368.9	6.1	Down
M376T516_2	343511	126250	126092	548312	326879	148085	381384	469323	238797	51102.7	336062	118967	74425.7	95791.5	325725	208996		308729	335195	52.3	181233	163982	62.03	1.7	0.77	0.0498834	1.3	0.285686	1.1893	376.142	516.4	8.6	Up
M376T631	34099.5	101494	61331.8	62143.3	48261.5	64508.5	82330.9	76671.7	87277.2	94287.4	71034.6	193094	22347.9	247852	121698	155502		66355.2	63325.9	31.25	124137	107993	58.15	0.53	-0.9	0.0498834	1.3	0.285686	1.02519	376.142	631.3	10.5	Down
M376T85	5.14671e+06	5.03085e+06	6.09391e+06	2.29921e+06	5.13275e+06	3.47403e+06	3.19115e+06	3.12391e+06	3.14875e+06	1.39813e+06	2.46618e+06	3.10094e+06	2.47965e+06	2.78036e+06	3.14962e+06	916223		4.18657e+06	4.25244e+06	31.74	2.42998e+06	2.63001e+06	34.67	1.72	0.78	0.0104118	1.98	0.130233	1.72732	375.889	85	1.4	Up
M377T121	132873	64305.3	74125.9	72320	37226.2	105913	138203	10516.6	354772	7485.35	348585	295043	350427	266612	291163	123298		79435.4	73222.9	56	254673	293103	49.1	0.31	-1.68	0.0206682	1.68	0.184282	1.20125	377.067	120.6	2	Down
M377T417	68343.2	84051.7	57877.7	75501.2	86270	91554.4	67658	77473.7	37660.1	82014.6	9894.32	10502.3	37981.1	42916.6	46396.2	76800.7		76091.2	76487.4	14.66	43020.7	40448.8	61.39	1.77	0.82	0.014763	1.83	0.158002	1.61211	377.019	417.2	7	Up
M377T604	267439	138348	258245	380345	327155	181157	266627	193085	168446	140808	178361	241177	178244	153291	193129	130106		251550	262436	31.52	172945	173345	20.02	1.45	0.54	0.0281274	1.55	0.216677	1.6142	377.237	604.3	10.1	Up
M377T722	843577	753590	4.36452e+06	376812	401076	805788	422213	967434	1.05927e+07	787077	5.69574e+06	1.57754e+06	8.38145e+06	1.10554e+07	7.91513e+06	1.32494e+06		1.11688e+06	779689	119.24	5916244	6.80544e+06	71.32	0.19	-2.41	0.004662	2.33	0.0886941	1.94743	377.272	721.9	12	Down
M377T837_1	7.14456e+07	6.42204e+07	3.08482e+07	7.39097e+07	3.97348e+07	8.29335e+07	6.84721e+07	6.4628e+07	2.38059e+07	4.00279e+07	3.84026e+07	2.88489e+07	4.36951e+07	4.14203e+07	4.5181e+07	4.34569e+07		6.2024e+07	6.655e+07	28.51	3.81048e+07	4.07241e+07	20.2	1.63	0.7	0.0281274	1.55	0.216677	1.85248	377.261	836.8	13.9	Up
M378T121	47953.4	131760	60873	396829	931046	752027	722400	729161	47019.2	26890.4	86751	570216	53013.1	24085.9	32500.8	76016		471506	559614	75.55	114562	50016.1	161.91	4.12	2.04	0.014763	1.83	0.158002	1.82205	378.049	120.8	2	Up
M378T394_2	444907	211002	567605	219882	935740	380215	895518	626615	1.09784e+06	2.00876e+06	1.86484e+06	1.3427e+06	1.63634e+06	570590	660453	639690		535186	506256	51.72	1.22765e+06	1.22027e+06	46.82	0.44	-1.2	0.00699301	2.16	0.1064	1.90777	378.053	393.6	6.6	Down
M378T446	42695.1	9698.94	49607.1	3564.34	6039.21	83959	4867.11	47488.7	93297.8	71088.7	118711	63490.4	138679	2578.33	78663.8	70967.3		30989.9	26197	95.04	79684.4	74876.3	50.97	0.39	-1.36	0.0379176	1.42	0.250052	1.35748	378.149	446.3	7.4	Down
M378T711	2.28811e+06	2.22115e+06	2.06948e+06	2.20914e+06	1.70503e+06	1.24728e+06	2.27263e+06	1.9376e+06	1.30664e+06	1.41989e+06	1.55748e+06	1.0381e+06	1.64189e+06	1.23546e+06	1.14157e+06	1.44324e+06		1.9938e+06	2.13931e+06	18.1	1.34804e+06	1.36327e+06	15.29	1.48	0.56	0.0029526	2.53	0.0725285	2.03519	378.235	711.1	11.9	Up
M378T745	111651	73177.4	237597	185006	287656	177563	150346	62940.4	613658	416538	267252	357318	573157	501039	218000	567912		160742	163954	48.55	439359	458789	33.81	0.37	-1.45	0.0010878	2.96	0.0513787	2.19059	378.231	745	12.4	Down
M379T692	104090	50079.4	86705.4	250992	122544	88036.5	88284.8	65492.7	38777.3	22476.7	15694.2	61521.3	13328.1	83412.8	18460.8	50506.7		107028	88160.6	58.1	38022.2	30627	66.7	2.81	1.49	0.0018648	2.73	0.0601903	2.11923	378.891	692.3	11.5	Up
M379T700	1.10177e+06	390169	470358	4.02375e+06	1.13838e+06	2.08316e+06	2.07737e+06	2.24941e+06	548071	324638	428979	161814	264925	327020	477083	195737		1.6918e+06	1.60788e+06	70.26	341033	325829	39.74	4.96	2.31	0.0029526	2.53	0.0725285	2.18309	379.246	700.5	11.7	Up
M379T741	418723	95922.3	153440	141359	228740	87533.3	73722.2	93148.7	318693	346230	199635	176940	244852	238459	230359	488218		161574	118641	71.45	280423	241655	36.1	0.58	-0.8	0.014763	1.83	0.158002	1.85493	379.233	741.4	12.4	Down
M379T747_1	5.39492e+06	7.89883e+06	1.06391e+07	1.90326e+07	1.10205e+07	1.07663e+07	1.95053e+07	1.6905e+07	1.07633e+06	1.40258e+07	1.30603e+06	637409	780853	5.68342e+06	6.00315e+06	6.08809e+06		1.26453e+07	1.08934e+07	41.34	4.45013e+06	3.49472e+06	103.18	2.84	1.51	0.0104118	1.98	0.130233	1.86248	378.975	747.2	12.5	Up
M379T763	1.1077e+07	1.05372e+07	9.68407e+06	1.04184e+07	1.34504e+07	1.10223e+07	9.51906e+06	9.53154e+06	3.22978e+06	1.47618e+07	3.48548e+06	2.7084e+06	8.47998e+06	1.86701e+06	6.97327e+06	2.20997e+06		1.0655e+07	1.04778e+07	12.13	5.46446e+06	3.35763e+06	81.21	1.95	0.96	0.0104118	1.98	0.130233	1.84312	378.987	762.8	12.7	Up
M379T81	1.23737e+06	1.36078e+06	1.67461e+06	1.5573e+06	1.36433e+06	1.41854e+06	1.33763e+06	1.47651e+06	1.44674e+06	1.05205e+06	1.11828e+06	1.31011e+06	1.24905e+06	1.20793e+06	995240	963993		1.42838e+06	1.39143e+06	9.65	1.16793e+06	1.16311e+06	14.23	1.22	0.29	0.00699301	2.16	0.1064	2.03497	379.015	80.7	1.3	Up
M379T813	6.86751e+07	5.0904e+07	4.5782e+07	7.46803e+07	4.11935e+07	4.96872e+07	8.01413e+07	1.03141e+08	1.14003e+08	6.51563e+07	1.00132e+08	8.48164e+07	5.43352e+07	9.88866e+07	8.99979e+07	9.59737e+07		6.42755e+07	5.97895e+07	33.04	8.79127e+07	9.29858e+07	22.23	0.73	-0.45	0.0498834	1.3	0.285686	1.46004	379.221	812.8	13.5	Down
M380T65	53707.8	48387.5	52382.7	45980.3	51261.1	53266.6	52886.2	48782.8	56502.1	56752.9	62559.8	59852.2	50946.3	57580.9	61648.9	54853.6		50831.9	51821.9	5.5	57587.1	57166.9	6.56	0.88	-0.18	0.0029526	2.53	0.0725285	2.14209	379.552	65.4	1.1	Down
M380T738	243706	132518	218669	197063	227599	558147	308353	149125	63512.7	91814.5	116526	158019	112752	220556	171969	240210		254398	223134	52.84	146920	137273	42.24	1.73	0.79	0.0498834	1.3	0.285686	1.55685	380.15	738.2	12.3	Up
M381T312	169798	95991.2	165806	119122	151423	110029	84381.1	99644.6	167741	204770	216012	217452	153451	113854	185405	214472		124524	114575	26.74	184145	195087	20.14	0.68	-0.56	0.00699301	2.16	0.1064	1.98176	380.965	312.3	5.2	Down
M381T695	47710.3	50382.9	55906.5	31816.2	54197.5	30085.2	41569.1	70366	6547.34	41889.9	4161.11	3124.17	4410.15	33559.8	33104.8	43413.4		47754.2	49046.6	27.77	21276.3	19826	85.74	2.24	1.17	0.0206682	1.68	0.184282	1.6903	381.228	694.7	11.6	Up
M381T793	528266	203624	769417	178917	79490	177454	170402	360643	561003	241176	816455	417121	915363	444682	904394	918944		308527	191270	75.51	652392	688729	41.23	0.47	-1.08	0.0104118	1.98	0.130233	1.79539	380.978	792.7	13.2	Down
M381T88_2	3.23769e+06	3.02712e+06	4.04231e+06	2.20891e+06	1.84748e+06	3.59851e+06	2.05073e+06	3.46594e+06	6.12774e+06	5.8707e+06	9.41985e+06	6.38677e+06	6.15996e+06	8.20273e+06	2.26898e+06	1.03533e+07		2.93483e+06	3.1324e+06	27.44	6.84875e+06	6.27336e+06	36.55	0.43	-1.22	0.0029526	2.53	0.0725285	2.08635	381.11	87.5	1.5	Down
M381T99_1	1.24226e+06	743947	969833	1.09451e+06	852069	740414	689479	874640	1.29056e+06	867799	1.50085e+06	985107	994598	932020	1.11599e+06	1.26848e+06		900894	863354	21.27	1.11943e+06	1.05529e+06	19.37	0.8	-0.31	0.0379176	1.42	0.250052	1.55407	381.09	99.1	1.7	Down
M382T112	2.43393e+06	1.18382e+06	2.39396e+06	1.26607e+06	1.57873e+06	1.78364e+06	1.30163e+06	1.75391e+06	2.99416e+06	2.53564e+06	2.90571e+06	2.61382e+06	1.66591e+06	1.36884e+06	2.38877e+06	1.98332e+06		1.71196e+06	1.66632e+06	28.42	2.30702e+06	2.46221e+06	25.27	0.74	-0.43	0.0498834	1.3	0.285686	1.54525	382.112	112.2	1.9	Down
M382T177	700519	1.10505e+06	870904	1.10073e+06	527988	861516	940201	966452	75989.3	462554	42132.2	78384.8	80958.2	671389	221499	636226		884170	905552	22.08	283642	151229	93.77	3.12	1.64	0.000621601	3.21	0.0444681	2.07851	382.009	177	3	Up
M382T250	1.05006e+06	1.39288e+06	1.3576e+06	1.07669e+06	1.28831e+06	1.5031e+06	1.07447e+06	1.15482e+06	886977	1.314e+06	928764	754332	1.13848e+06	988388	998915	1.16489e+06		1.23724e+06	1.22157e+06	13.87	1.02184e+06	993652	17.33	1.21	0.28	0.0379176	1.42	0.250052	1.49669	382.069	250.3	4.2	Up
M382T372	133854	208835	186835	142303	117148	192142	169444	153655	36687.6	126267	23262	32144.8	28232.1	149228	114610	135249		163027	161550	19.44	80710	75648.7	68.26	2.02	1.01	0.004662	2.33	0.0886941	1.83264	382.092	371.6	6.2	Up
M382T770	543506	607622	595614	456130	512402	586608	653153	759328	892045	852841	742047	521449	748281	1.06513e+06	1.45629e+06	1.40129e+06		589295	591111	15.59	959923	872443	34.16	0.61	-0.7	0.0104118	1.98	0.130233	1.96546	382.204	769.5	12.8	Down
M382T833	3.22394e+06	1.82128e+06	494486	2.37569e+06	2.70753e+06	2.02234e+06	2.05654e+06	2.31873e+06	1.25117e+06	398246	431915	655323	1.34218e+06	526797	1.42367e+06	1.36494e+06		2.12757e+06	2.18763e+06	37.32	924279	953244	49.66	2.3	1.2	0.004662	2.33	0.0886941	1.77614	382.332	833.3	13.9	Up
M383T100	49254.2	41469.8	61005	39422.1	33434.5	35761.6	58588.1	52373.8	45048.6	77223.5	79879.8	67665.9	67984.7	114821	36455.3	51891.3		46413.6	45362	22.45	67621.2	67825.3	36.22	0.69	-0.54	0.0498834	1.3	0.285686	1.43514	383.166	99.7	1.7	Down
M383T304_1	367620	68195.9	107651	220334	81068	257280	84742.4	70924.1	346625	513709	84809.9	110930	345072	458896	514734	332707		157227	96196.6	70.97	338435	345849	49	0.46	-1.11	0.0206682	1.68	0.184282	1.56445	383.101	304.1	5.1	Down
M383T312_1	260313	324741	220837	233925	283817	179482	224647	206437	224619	109319	202900	179796	196913	162294	28583.3	153335		241775	229286	19.09	157220	171045	39.94	1.54	0.62	0.004662	2.33	0.0886941	1.50762	382.963	312.3	5.2	Up
M383T71_1	341009	387631	388984	387305	365471	371565	361663	417375	48503.2	363025	45392.6	46127.5	41886.9	353886	344895	382372		377625	379435	6.07	203261	196699	83.15	1.86	0.89	0.0104118	1.98	0.130233	1.63074	382.979	71.3	1.2	Up
M384T378	38294.8	44498.3	53077.5	26820.9	18358.3	57538.3	32368.8	39294.9	69493.3	58917.2	59921.2	83293.4	51099.7	69250.6	54604.9	96054.1		38781.5	38794.9	33.63	67829.3	64585.9	22.55	0.57	-0.81	0.0010878	2.96	0.0513787	2.0058	384.142	377.5	6.3	Down
M384T778	309779	530749	592159	431707	507019	323881	527684	376721	946659	745680	1.10187e+06	711496	540051	636850	492755	540754		449963	469363	23.35	714514	674173	29.96	0.63	-0.67	0.004662	2.33	0.0886941	1.91454	384.154	778.4	13	Down
M384T89	739638	559371	651532	736155	416933	874264	762503	772339	380133	377530	450911	423381	413534	486131	404987	563409		689092	737896	20.79	437502	418458	14.23	1.58	0.66	0.0029526	2.53	0.0725285	2.23893	384.036	88.8	1.5	Up
M384T99	1.46598e+06	836680	1.36957e+06	1.05312e+06	1.35355e+06	1.19148e+06	1.19505e+06	1.38042e+06	1.4996e+06	1.50513e+06	1.36823e+06	1.37781e+06	1.38592e+06	1.34122e+06	1.50802e+06	1.41448e+06		1.23073e+06	1.2743e+06	16.87	1.42505e+06	1.4002e+06	4.82	0.86	-0.21	0.0281274	1.55	0.216677	1.64433	384.106	99.2	1.7	Down
M385T304	921465	270811	1.06173e+06	280222	567111	489598	430426	580217	163420	397245	262804	489486	286459	377119	554182	256978		575198	528354	49.38	348462	331789	37.45	1.65	0.72	0.0498834	1.3	0.285686	1.29071	385.109	304.2	5.1	Up
M385T482	226251	121265	152786	220981	179176	136862	131346	177796	60419.7	72041.6	24412.8	91424.1	35221.5	123559	148211	18382.2		168308	165291	23.71	71709	66230.7	65.56	2.35	1.23	0.0018648	2.73	0.0601903	2.06115	385.222	482.5	8	Up
M386T108	667906	942922	837162	748203	976265	639409	713422	758783	1.17939e+06	796629	1.17197e+06	909154	1.02483e+06	836467	1.04151e+06	849090		785509	753493	15.69	976129	966993	15.42	0.8	-0.31	0.0206682	1.68	0.184282	1.74234	386.04	107.9	1.8	Down
M386T524	60969.5	68623.3	85282.3	70794.3	50893.3	75107.6	69472.5	50263.8	49431.8	54567.9	60537.5	51194.5	62488.1	45647.3	49932.7	57411.7		66425.8	69047.9	17.96	53901.4	52881.2	10.9	1.23	0.3	0.0281274	1.55	0.216677	1.60812	386.211	524.1	8.7	Up
M386T530	1721.87	94934.7	127376	190876	90056.6	104583	117358	92424	7847.88	8906.55	62896.9	2933.77	81723.8	82827	69425.8	13384.2		102416	99758.9	51.04	41243.2	38140.5	87.11	2.48	1.31	0.0104118	1.98	0.130233	1.12395	386.211	530.1	8.8	Up
M386T792_1	2.93747e+06	3.7053e+06	2.79599e+06	3.08207e+06	1.03555e+07	3.7527e+06	3.29303e+06	4.77082e+06	2.03912e+07	1.18543e+07	3.4453e+07	9.72632e+06	1.49812e+07	1.86148e+06	8.22994e+06	1.12791e+07		4.33661e+06	3.49917e+06	57.91	1.40971e+07	1.15667e+07	69.45	0.31	-1.7	0.0206682	1.68	0.184282	1.87901	386.223	791.6	13.2	Down
M387T374	231712	261580	203056	233478	260051	225602	211216	209618	201375	180723	181804	237334	194554	223696	218808	153828		229539	228657	9.64	199015	197964	13.65	1.15	0.21	0.0379176	1.42	0.250052	1.66973	386.962	374.2	6.2	Up
M387T523_1	1.37659e+06	661666	227524	578684	2.49085e+06	703829	186689	910041	1.85236e+06	3.62875e+06	2.85441e+06	721885	1.3028e+06	1.20608e+06	2.1328e+06	2.79746e+06		891984	682747	83.86	2.06207e+06	1.99258e+06	47.72	0.43	-1.21	0.014763	1.83	0.158002	1.84188	387.238	523.3	8.7	Down
M387T65_2	45938.5	41416.1	44550.6	40402.9	44962.2	42502.6	45212.4	43177.8	49401.2	47915.8	54182.9	51301.6	42372.6	46600.8	52540	44805.4		43520.4	43864.2	4.53	48640	48658.5	8.23	0.89	-0.16	0.014763	1.83	0.158002	1.93374	386.56	64.8	1.1	Down
M387T741	2.02359e+06	2.8517e+06	2.86614e+06	2.10646e+06	980704	3.19003e+06	2.4507e+06	2.16646e+06	4.12926e+06	1.91515e+06	3.63562e+06	3.15866e+06	3.39509e+06	2.92848e+06	2.27345e+06	3.49112e+06		2.32947e+06	2.30858e+06	29.5	3.11585e+06	3.27687e+06	23.35	0.75	-0.42	0.0498834	1.3	0.285686	1.24689	387.286	740.8	12.3	Down
M387T747	618367	314465	730145	1.80503e+06	430661	1.83653e+06	1.45423e+06	2.02169e+06	274388	471097	172591	76108.9	93875.6	709201	721717	528667		1.15139e+06	1.09219e+06	60.77	380956	372742	69.02	3.02	1.6	0.0206682	1.68	0.184282	1.74422	387.192	747.3	12.5	Up
M387T78	5.89835e+06	5.93891e+06	5.77314e+06	3.73803e+06	4.40005e+06	4.72725e+06	5.14687e+06	5.78824e+06	5.94301e+06	5.77002e+06	6.25537e+06	6.14928e+06	7.15447e+06	4.42018e+06	6.08886e+06	8.73199e+06		5.17635e+06	5.46e+06	15.84	6.31415e+06	6.11907e+06	19.54	0.82	-0.29	0.0206682	1.68	0.184282	1.51935	387.115	78.3	1.3	Down
M387T792_1	8.06174e+06	5.88447e+06	9.95525e+06	6.83631e+06	1.32513e+07	5.7303e+06	7.09258e+06	8.87939e+06	3.40237e+07	1.89358e+07	5.33469e+07	1.99361e+07	2.37569e+07	4.49939e+06	1.59427e+07	1.77121e+07		8.21142e+06	7.57716e+06	30.4	2.35192e+07	1.9436e+07	61.97	0.35	-1.52	0.0104118	1.98	0.130233	1.9812	387.238	791.5	13.2	Down
M387T82	459290	774008	1.16973e+06	999801	163682	845086	106593	611436	2.24255e+06	165013	2.13794e+06	2.73364e+06	2.09001e+06	998632	1.09105e+06	2.17525e+06		641203	692722	59.39	1.70426e+06	2.11397e+06	50.34	0.38	-1.41	0.014763	1.83	0.158002	1.35002	386.713	82.4	1.4	Down
M388T523	132009	26477	47955.6	333724	744209	64467.6	39497.8	65649.6	381671	1.70514e+06	833298	43251.5	96385.3	425241	532732	671924		181749	65058.6	136.59	586205	478986	89.47	0.31	-1.69	0.0498834	1.3	0.285686	1.61869	388.241	523.3	8.7	Down
M388T591	34294.5	12830.8	26166.8	9252.42	29775.5	26478.1	24555	34961.6	67148.4	145703	186493	138616	93289.7	18376.3	42176.8	22898.3		24789.4	26322.5	37.59	89337.5	80219	69.81	0.28	-1.85	0.0379176	1.42	0.250052	1.86667	388.106	591.2	9.9	Down
M388T739	89217.6	98470.6	63750.8	69004.1	25496.2	175828	125496	44922.6	383633	68963.3	265329	155058	322762	167213	97142.9	132323		86523.3	79110.9	55.13	199053	161135	56.48	0.43	-1.2	0.0281274	1.55	0.216677	1.63012	388.196	739.4	12.3	Down
M388T77	4.31473e+06	2.33682e+07	8.08977e+06	5.97932e+06	7.82647e+06	3.6676e+06	6.35614e+06	8.50077e+06	6.28961e+06	3.76566e+06	5.24657e+06	4.9911e+06	5.40189e+06	1.7032e+06	1.73425e+06	1.98262e+06		8.51288e+06	7.0913e+06	73.43	3.88936e+06	4.37838e+06	47.79	2.19	1.13	0.0206682	1.68	0.184282	1.675	388.012	77.5	1.3	Up
M388T815_2	910255	5.75741e+06	4.25058e+06	3.83299e+06	301598	4.90998e+06	726089	4.7617e+06	6.1686e+06	4.0617e+06	7.58991e+06	4.35265e+06	8.16006e+06	6.78654e+06	4.89869e+06	5.26531e+06		3.18132e+06	4.04178e+06	68.42	5.91043e+06	5.71695e+06	25.58	0.54	-0.89	0.0206682	1.68	0.184282	1.44025	388.264	814.8	13.6	Down
M389T620	434354	412049	787930	465587	159254	309966	363819	518550	947269	333508	444106	848207	560753	570125	677125	894902		431439	423201	41.98	659500	623625	33.64	0.65	-0.61	0.0379176	1.42	0.250052	1.37083	389.21	619.6	10.3	Down
M389T756	1.38724e+06	1.49363e+06	1.39324e+06	2.71823e+06	1.43893e+06	962373	1.22963e+06	1.38478e+06	711417	625371	472692	952291	1.43717e+06	1.22456e+06	718950	691303		1.50101e+06	1.39024e+06	34.59	854219	715183	38.31	1.76	0.81	0.004662	2.33	0.0886941	2.05208	389.139	756	12.6	Up
M389T77	2.06108e+06	1.65966e+06	1.34562e+06	890672	2.37518e+06	816167	2.12744e+06	1.48422e+06	380166	216584	279537	724325	206379	932883	1.09688e+06	676777		1.59501e+06	1.57194e+06	35.87	564191	528472	60.73	2.83	1.5	0.0018648	2.73	0.0601903	2.12695	389.012	77.3	1.3	Up
M389T810	43052.6	249429	244714	404180	184071	234275	310276	553707	175203	198589	128748	41634	176580	116962	117046	310856		277963	247071	54.53	158202	151976	49.78	1.76	0.81	0.0498834	1.3	0.285686	1.06627	389.076	809.6	13.5	Up
M389T815	3.16502e+07	1.28501e+07	2.74184e+07	5.01603e+07	1.93982e+07	4.09265e+07	4.80334e+07	5.38164e+07	9.16024e+06	1.08828e+07	8.5718e+06	2.07141e+06	3.25786e+06	1.05404e+07	1.7795e+07	3.04012e+06		3.55317e+07	3.62884e+07	42.41	8.16495e+06	8.86602e+06	64.54	4.35	2.12	0.0003108	3.51	0.040447	2.2248	389.255	814.8	13.6	Up
M390T69	524613	590825	558366	618961	570949	601086	590491	627032	191391	532696	142799	144156	165972	453605	440932	427515		585291	590658	5.7	312383	309453	52.93	1.87	0.91	0.0003108	3.51	0.040447	1.9615	390.115	68.9	1.1	Up
M390T709	716071	898531	1.13687e+06	699029	454095	790022	980231	812672	1.04197e+06	1.09362e+06	1.01359e+06	1.47165e+06	1.00131e+06	1.31131e+06	983862	1.13939e+06		810941	801347	25.18	1.13209e+06	1.0678e+06	15.31	0.72	-0.48	0.0029526	2.53	0.0725285	1.77375	390.212	708.6	11.8	Down
M390T85	1.24078e+06	1.23269e+06	1.59979e+06	1.4821e+06	1.06348e+06	1.24835e+06	1.40954e+06	1.33605e+06	2.0553e+06	1.37833e+06	2.168e+06	2.13113e+06	1.577e+06	1.51316e+06	1.07748e+06	1.84641e+06		1.3266e+06	1.2922e+06	12.66	1.71835e+06	1.71171e+06	22.97	0.77	-0.37	0.0379176	1.42	0.250052	1.4885	389.965	84.9	1.4	Down
M391T369	41560.8	28084.6	62257.7	66576.2	267100	312616	13238	136355	1.67558e+06	376458	1.8235e+06	1.49289e+06	1.08567e+06	387717	52252.5	381880		115973	64416.9	98.35	909494	736694	76.21	0.13	-2.97	0.0029526	2.53	0.0725285	1.93146	390.983	368.9	6.1	Down
M391T625	1.45032e+06	683276	647351	853077	1.14698e+06	774595	3.8835e+06	1.48096e+06	81995.5	1.40388e+06	88942	76764.9	34518	794013	993178	16470		1.36501e+06	1.00003e+06	78.33	436220	85468.8	125.18	3.13	1.65	0.0379176	1.42	0.250052	1.80843	391.213	624.7	10.4	Up
M391T656	524756	226508	291374	201649	340946	456254	190734	220134	618235	545153	611326	641664	542746	507773	254341	544752		306544	258941	40.84	533249	544952	22.84	0.57	-0.8	0.0029526	2.53	0.0725285	1.94801	391.178	655.8	10.9	Down
M392T251	413595	129826	165943	228340	60192.9	546041	122157	380473	638998	572152	1.59918e+06	862156	838919	130789	130966	585740		255821	197142	66.98	669863	612369	69.74	0.38	-1.39	0.0206682	1.68	0.184282	1.43364	392.088	251.4	4.2	Down
M392T454	299986	471239	387673	342412	284982	456788	198831	390842	21868.3	225553	5574.07	13085.7	19430.4	225079	152152	239836		354094	365043	25.86	112822	87010.1	95.6	3.14	1.65	0.0010878	2.96	0.0513787	1.88669	392.194	453.5	7.6	Up
M392T66	46894.7	52016	56099.9	51259	67463.7	61660.4	85754.3	64136.3	47646.4	68333.3	35916.9	61425.1	40415.1	47728.4	40976.7	35042.5		60660.5	58880.2	20.31	47185.6	44311.6	25.45	1.29	0.36	0.0498834	1.3	0.285686	1.59206	391.539	65.7	1.1	Up
M392T711	3.9807e+06	1.22142e+06	669196	1.69048e+06	979579	1.34633e+06	2.35397e+06	761869	487860	401688	330814	327704	491527	1.21913e+06	666210	1.44638e+06		1.62544e+06	1.28387e+06	67.4	671414	489694	63.53	2.42	1.28	0.0104118	1.98	0.130233	1.74358	392.215	711.5	11.9	Up
M393T505	697311	982220	533125	1.05699e+06	683498	611328	135286	253207	107435	109008	120945	133199	165702	89636.6	134073	316884		619121	647413	51.41	147110	127072	49.12	4.21	2.07	0.0010878	2.96	0.0513787	2.21654	393.096	504.8	8.4	Up
M393T659	321322	276080	230376	310113	344942	369518	371361	423933	464379	525756	472683	512247	401100	353253	337743	494394		330956	333132	18.28	445194	468531	16.21	0.74	-0.43	0.0104118	1.98	0.130233	1.86472	393.152	659.4	11	Down
M393T73	768788	97756.9	654585	400010	533795	372558	476696	418790	635063	1.10974e+06	1.2863e+06	1.19844e+06	619927	580792	982490	493005		465372	447743	43.2	863220	808777	36.49	0.54	-0.89	0.014763	1.83	0.158002	1.72372	393.007	73.1	1.2	Down
M394T100	28692.5	36594.8	35281.3	22084	27828.9	34024.9	40077.9	29913	39600.8	40296.1	44207.1	39784.2	36480.9	32647.6	34217.7	47604		31812.2	31968.9	18.1	39354.8	39692.5	12.61	0.81	-0.31	0.0281274	1.55	0.216677	1.73599	394.146	99.8	1.7	Down
M394T72	750546	721161	723551	332299	1.50708e+06	414423	356141	103012	523784	1.80319e+06	2.62635e+06	427982	2.41904e+06	1.16885e+06	2.45819e+06	978239		613527	567792	69.88	1.5507e+06	1.48602e+06	57.61	0.4	-1.34	0.0206682	1.68	0.184282	1.75418	394.021	71.8	1.2	Down
M395T674_2	980608	3.46986e+06	282736	2.88333e+06	8.29798e+06	2.25857e+06	1.85522e+06	3.45758e+06	1.40138e+06	443055	1.18948e+06	229261	975941	147910	257108	455945		2.93574e+06	2.57095e+06	83.24	637510	449500	75.57	4.61	2.2	0.00699301	2.16	0.1064	1.82159	394.986	674.1	11.2	Up
M396T674	620043	1.02722e+06	100494	239255	1.03674e+06	429522	347655	484840	138045	134333	122328	82976.6	302065	44411.3	77374.4	507707		535720	457181	64.13	176155	128331	87.86	3.04	1.6	0.0206682	1.68	0.184282	1.71689	395.977	674.1	11.2	Up
M396T82	862671	872497	832537	834083	715903	838350	839229	795445	1.15193e+06	765296	1.34567e+06	1.01959e+06	1.09411e+06	896477	874828	904446		823840	836217	5.97	1.00654e+06	962016	18.48	0.82	-0.29	0.00699301	2.16	0.1064	1.67019	395.979	82.3	1.4	Down
M396T84	5.00526e+06	6.63677e+06	1.56064e+06	3.9213e+06	6.42629e+06	4.43363e+06	5.09074e+06	5.06805e+06	4.59413e+06	914789	1.29565e+06	1.20229e+06	4.21371e+06	3.62219e+06	989998	3.18054e+06		4.76784e+06	5.03666e+06	33.27	2.50166e+06	2238093	62.24	1.91	0.93	0.00699301	2.16	0.1064	1.67853	395.954	84.4	1.4	Up
M397T104	192225	361370	247615	312984	373643	337946	306271	349927	142442	209726	203131	181674	120612	197585	149808	225510		310248	325465	19.96	178811	189629	20.75	1.74	0.79	0.0018648	2.73	0.0601903	2.30398	397.146	103.7	1.7	Up
M397T251	430126	363469	580874	302893	608315	333846	349238	308709	674017	741081	930157	788346	939819	292034	585265	746957		409684	356354	29.51	712210	744019	29.13	0.58	-0.8	0.014763	1.83	0.158002	1.98217	397.03	250.8	4.2	Down
M397T74	1.19644e+06	1.1987e+06	1.00793e+06	1.2957e+06	1.72217e+06	1.27338e+06	1.48269e+06	1.49883e+06	2.40164e+06	1.98366e+06	1.84757e+06	1.42967e+06	1.75018e+06	1.77422e+06	1.38205e+06	2.25416e+06		1.33448e+06	1.28454e+06	16.72	1.85289e+06	1.81089e+06	19.32	0.72	-0.47	0.004662	2.33	0.0886941	1.9919	397.038	74	1.2	Down
M399T86_2	1.02632e+06	652864	1.08204e+06	643512	768704	1.11696e+06	637969	840633	3.48183e+06	741575	5.62323e+06	3.05873e+06	4.26687e+06	750665	2.01502e+06	1.58223e+06		846126	804668	24.02	2.69002e+06	2.53687e+06	64.53	0.31	-1.67	0.0206682	1.68	0.184282	1.91872	399.05	86.5	1.4	Down
M400T109	491595	272120	499893	229336	474544	314806	256706	450524	585225	495100	633394	536413	420352	470297	466388	570162		373690	382665	31.04	522166	515756	13.69	0.72	-0.48	0.0281274	1.55	0.216677	1.87747	400.055	108.5	1.8	Down
M400T303	74702.9	121141	91202.4	115284	101181	115095	116146	124035	56642.7	70565.9	55172.4	71154.3	58391.1	77147.3	80130.8	62935.4		107349	115190	15.88	66517.5	66750.6	14.39	1.61	0.69	0.000621601	3.21	0.0444681	2.49027	400.055	303.4	5.1	Up
M400T654	192565	110186	100065	270059	103119	164427	279055	316237	143689	93118.3	105749	102831	98321.7	80670.9	71904.5	186168		191964	178496	45.29	110306	100576	33.81	1.74	0.8	0.0206682	1.68	0.184282	1.61421	400.191	653.9	10.9	Up
M400T659	154308	210899	315087	318071	154662	613242	200175	232745	52417	153224	30598.4	21697.3	50558.8	169887	50686.1	166358		274899	221822	54.72	86928.4	51551.6	73.84	3.16	1.66	0.0018648	2.73	0.0601903	2.08453	400.179	659	11	Up
M400T66_1	37062.7	20242.2	32100	20597.3	41208.1	26898.7	37634.8	19625.9	33185.7	68611.2	59312.8	45762.5	31181.8	43718.8	42001.9	40474.2		29421.2	29499.4	29.75	45531.1	42860.4	27.81	0.65	-0.63	0.0104118	1.98	0.130233	1.93241	399.502	66.4	1.1	Down
M400T69_2	6.08058e+06	8.15091e+06	7.08399e+06	8.31514e+06	7.52988e+06	9.08047e+06	7.89424e+06	8.36796e+06	3.19086e+06	7.19407e+06	2.34896e+06	2.63039e+06	2.72744e+06	4.86014e+06	5.42864e+06	5.43374e+06		7.8129e+06	8.02257e+06	11.75	4.22678e+06	4.0255e+06	41.47	1.85	0.89	0.000621601	3.21	0.0444681	2.14737	400.022	69.1	1.2	Up
M401T765	282059	167953	310600	285618	491721	112169	223213	347725	658503	792604	650195	469013	316881	213386	855203	835074		277632	283838	41.8	598857	654349	40.42	0.46	-1.11	0.014763	1.83	0.158002	1.95789	401.198	764.5	12.7	Down
M401T98	1.06689e+06	1.25348e+06	1.26367e+06	552096	1.23384e+06	783858	815340	821549	721456	420692	669390	755517	654499	628488	615106	287179		973841	944220	27.46	594041	641494	26.81	1.64	0.71	0.004662	2.33	0.0886941	1.83835	401.122	98.4	1.6	Up
M402T320	8108.23	7789.12	7320.96	13710.3	9271.92	7764.38	9715.07	7285.36	5396.25	5247.92	5777.42	6913.9	5636.43	10592.1	8992.77	5544.95		8870.67	7948.68	24.17	6762.71	5706.92	29.33	1.31	0.39	0.0379176	1.42	0.250052	1.61688	401.924	319.7	5.3	Up
M402T322	52504.4	490.228	4193.94	17610	2803.34	5593.33	574.609	978.825	41218.4	5306.85	23357.1	59917	49930.4	22018.3	35410.6	26921		10593.6	3498.64	168.38	33010	31165.8	52.5	0.32	-1.64	0.014763	1.83	0.158002	1.87308	402.186	322.3	5.4	Down
M403T100	3.85178e+06	3.5268e+06	4.0101e+06	3.75368e+06	3.2413e+06	3.43229e+06	3.02419e+06	3.08531e+06	2.86901e+06	2.9296e+06	2.7421e+06	3.28582e+06	3.17985e+06	3.30673e+06	3.31007e+06	2.72421e+06		3.49068e+06	3.47955e+06	10.38	3.04342e+06	3.05472e+06	8.37	1.15	0.2	0.0281274	1.55	0.216677	1.76212	403.138	99.8	1.7	Up
M403T306	78832.6	74921.7	74342.9	126792	45426.9	85124.9	65075.6	78026	49143.9	27833.6	53164	61101.6	50248.4	36777.8	48474.4	50019.2		78567.8	76473.8	29.18	47095.4	49581.6	21.76	1.67	0.74	0.004662	2.33	0.0886941	2.09918	403.053	305.7	5.1	Up
M403T505	148539	174993	273108	115428	70897.2	170716	147133	181264	187782	170854	260048	179136	197945	259380	220558	207556		160260	159628	36.39	210407	202751	16.25	0.76	-0.39	0.0281274	1.55	0.216677	1.41894	403.124	504.8	8.4	Down
M403T591	22339.4	26887.1	25055.6	28930.7	20764.7	30473.4	91500.6	45084.3	30583.2	81540	26339	32691.1	98001.9	37648.5	172266	88103.8		36379.5	27908.9	64.58	70896.7	59594.3	70.72	0.51	-0.96	0.0498834	1.3	0.285686	1.36278	403.017	591.1	9.9	Down
M403T76	173964	199364	197838	248128	191958	176914	179440	202896	169884	142051	155208	189767	131887	172531	148806	130017		196313	194898	12.05	155019	152007	13.58	1.27	0.34	0.0010878	2.96	0.0513787	2.16798	402.993	76.2	1.3	Up
M404T85_2	7.18581e+06	4.29964e+06	7.7324e+06	7.07709e+06	8.46913e+06	6.17944e+06	9.15269e+06	9.23492e+06	9.23285e+06	9.77395e+06	1.6049e+07	9.27332e+06	1.00123e+07	6.92475e+06	6.49933e+06	1.01847e+07		7.41639e+06	7.45911e+06	22.18	9.74376e+06	9.52363e+06	29.79	0.76	-0.39	0.0498834	1.3	0.285686	1.41986	403.948	85.1	1.4	Down
M405T71	168382	207175	173741	143311	168857	259948	200534	245235	371604	352169	461769	230609	351122	186275	348525	239051		195898	187137	20.63	317640	349824	28.65	0.62	-0.7	0.0104118	1.98	0.130233	2.02719	405.041	71	1.2	Down
M407T105	101808	120972	101967	131415	48686.8	71334.6	102465	94643	192345	162766	214321	223244	198085	213040	231601	195641		96661.5	101888	27.19	203880	205562	10.59	0.47	-1.08	0.0001554	3.81	0.0365579	2.42182	407.166	105.4	1.8	Down
M407T178	541969	563753	512945	333941	519639	472662	141029	156462	130026	123994	121533	266005	111964	81366.9	118154	90385.9		405300	492803	42.72	130429	119844	43.95	3.11	1.64	0.000621601	3.21	0.0444681	2.18841	407.098	177.5	3	Up
M407T269	185199	8669.18	113443	107555	26938.1	110620	25275.1	22243.9	49089.9	185754	136814	205673	224611	214530	240779	198447		74992.8	67246.6	84.21	181962	202060	34.06	0.41	-1.28	0.0029526	2.53	0.0725285	1.76308	407.098	269	4.5	Down
M407T593	48097.6	165112	73330.4	95816	114482	124774	146057	78870.8	78131.5	218272	129431	124490	200392	145433	205065	167286		105818	105149	37.09	158563	156360	30.34	0.67	-0.58	0.0498834	1.3	0.285686	1.44334	407.207	592.9	9.9	Down
M407T665	667548	411083	635967	539929	1.04963e+06	926297	920558	1.00437e+06	53290.5	945349	143124	120470	141674	337312	542321	307328		769423	794053	30.69	323858	225226	91.51	2.38	1.25	0.0104118	1.98	0.130233	1.8305	407.149	664.9	11.1	Up
M407T768	48003.9	675473	43392.6	56894.5	1.82009e+06	885372	500863	2.26179e+06	2.35844e+06	1.8051e+07	6.80181e+06	1.62394e+06	2.31603e+06	365866	7.29288e+06	2.07978e+06		786486	588168	107.23	5.11122e+06	2.33724e+06	113.2	0.15	-2.7	0.0104118	1.98	0.130233	1.83363	407.164	767.7	12.8	Down
M407T834_1	2.15185e+06	3.05667e+06	2.63384e+06	2.6573e+06	4.0164e+06	2.63061e+06	3.59658e+06	3.55747e+06	3.434e+06	3.06456e+06	3.72281e+06	3.2887e+06	3.53081e+06	5.6309e+06	4.86561e+06	4.46417e+06		3.03759e+06	2.85699e+06	20.82	4.0002e+06	3.62681e+06	22.41	0.76	-0.4	0.0498834	1.3	0.285686	1.5818	407.243	834	13.9	Down
M408T537	105937	161753	156058	157183	152501	182951	247078	252320	320170	330044	307133	261225	312776	168842	179646	281126		176973	159468	28.12	270120	294129	23.38	0.66	-0.61	0.004662	2.33	0.0886941	1.80448	408.204	537.2	9	Down
M408T599	39139.6	5200.04	27384.6	15901.3	23881.1	14718.2	18434.6	29995.5	40712.4	40158.1	82678.3	19043	29695.1	5982.9	59228	45046.8		21831.9	21157.9	48.2	40318.1	40435.3	58.69	0.54	-0.88	0.0498834	1.3	0.285686	1.23796	408.204	599.1	10	Down
M409T536	73033.1	267628	113134	66477.8	256137	156183	172183	250184	68426.4	101669	122428	58255.5	75960.7	75860.6	58031.2	149649		169370	164183	48.34	88785.1	75910.6	37.18	1.91	0.93	0.0498834	1.3	0.285686	1.53644	409.147	536.3	8.9	Up
M409T798	8.10521e+06	2.71412e+06	3.23346e+06	2.36377e+06	7.16524e+06	6.02279e+06	1.20296e+07	1.39588e+07	1.93023e+06	3.06666e+06	6.33159e+06	1.13432e+06	3.78689e+06	2.3158e+06	7.04152e+06	2.1484e+06		6.94912e+06	6594013	62	3.46943e+06	2.69123e+06	61.74	2	1	0.0498834	1.3	0.285686	1.24626	409.307	797.6	13.3	Up
M409T85_2	793931	621612	738281	936964	999410	678975	218100	848811	554437	125591	651008	818661	146389	686063	199005	117960		729511	766106	33.18	412389	376721	71.13	1.77	0.82	0.0281274	1.55	0.216677	1.5689	409.022	85.4	1.4	Up
M410T508	240643	359001	176432	417920	388944	308777	452306	249865	45799.8	421016	76019.2	54321.6	70139.1	84623.5	133755	103444		324236	333889	29.76	123640	80321.4	99.74	2.62	1.39	0.00699301	2.16	0.1064	2.10701	410.147	507.6	8.5	Up
M410T798	1.30908e+06	1.44127e+06	1.17854e+06	1.35797e+06	1.12377e+06	1.87666e+06	1.53252e+06	1.41027e+06	1.08677e+06	780957	906213	1.63672e+06	1.02959e+06	1.33398e+06	1.13687e+06	1.28105e+06		1.40376e+06	1.38412e+06	16.64	1.14902e+06	1.11182e+06	23.31	1.22	0.29	0.0498834	1.3	0.285686	1.58635	410.31	797.6	13.3	Up
M411T446_1	133745	1.57135e+06	531986	800523	3.41128e+06	1.6745e+06	1.69223e+06	1.56558e+06	632625	510987	1.06833e+06	113408	118363	52126.5	53401.6	91031.7		1.42265e+06	1.56847e+06	70.17	330034	115886	112.91	4.31	2.11	0.004662	2.33	0.0886941	1.83655	411.103	446.4	7.4	Up
M411T53	56201.5	37817	40794.5	36751.7	38714.1	27746.9	35384.9	19673.6	93817.6	75450.5	65488.2	93441.2	39327.3	94849.4	151000	71940.6		36635.5	37284.3	28.7	85664.3	84445.9	37.77	0.43	-1.23	0.000621601	3.21	0.0444681	2.26408	410.788	52.6	0.9	Down
M411T88_3	1.43229e+07	1.70965e+07	1.42873e+07	1.53014e+07	1.4421e+07	1.75782e+07	1.82831e+07	1.65404e+07	1.18303e+07	1.28825e+07	1.40747e+07	5.44801e+06	4.43461e+06	1.02337e+07	1.47438e+07	4.05788e+06		1.59788e+07	1.59209e+07	10.01	9.71318e+06	1.1032e+07	45.57	1.65	0.72	0.0010878	2.96	0.0513787	1.77536	411.087	87.6	1.5	Up
M412T107	439757	418333	219787	649311	315666	430437	373711	358813	10674.5	12454.9	11755.4	10634.8	4669.39	266143	7185.7	7141.54		400727	396022	30.85	41332.4	10654.7	219.87	9.7	3.28	0.0003108	3.51	0.040447	2.583	412.055	106.8	1.8	Up
M412T333	44167.5	33673.8	50204.1	33534.1	64944.3	38174.1	55384.1	50140.7	133558	112945	160817	75358.5	97408	28289.6	95903.4	74263		46277.8	47154.1	23.85	97317.8	96655.7	41.41	0.48	-1.07	0.0104118	1.98	0.130233	1.98839	412.256	332.6	5.5	Down
M412T335	51304.8	58120.2	41424.3	48061.4	67736	35275.5	55887.7	44752.7	50393.5	47728.1	38216.8	40712.2	36839.9	8562.23	31135	43504.7		50320.3	49683.1	20.4	37136.5	39464.5	35.18	1.36	0.44	0.0379176	1.42	0.250052	1.1257	412.018	335	5.6	Up
M412T720	345095	392621	280798	242845	372546	196615	274326	150244	189443	135581	126703	190021	335697	198132	161900	221289		281886	277562	30.18	194846	189732	33.51	1.45	0.53	0.0379176	1.42	0.250052	1.47659	411.993	719.5	12	Up
M413T114	165590	247776	243595	279669	307639	263121	342188	473084	138546	362929	102692	72248.8	144611	238646	169296	216621		290333	271395	31.03	180699	156954	50.77	1.61	0.68	0.0206682	1.68	0.184282	1.59349	413.243	113.7	1.9	Up
M413T71	134347	154357	168039	132557	147037	132583	382439	137844	107655	120519	94534.8	41593.1	105379	173260	5279.01	156893		173650	142440	49.11	100639	106517	55.1	1.73	0.79	0.0498834	1.3	0.285686	1.29429	412.987	71.4	1.2	Up
M414T348	270612	296583	199357	291954	250573	290621	326981	227537	84857.1	268423	81160.7	76666.7	74792.7	170135	192917	151764		269277	280617	15.39	137590	118310	51.44	1.96	0.97	0.0010878	2.96	0.0513787	2.0645	414.125	347.7	5.8	Up
M414T69	219433	178541	200879	221850	281698	184141	217947	208005	235052	249881	241310	225848	199023	248139	223002	222304		214062	212976	14.82	230570	230450	7.26	0.93	-0.11	0.0498834	1.3	0.285686	1.08966	414.033	69.1	1.2	Down
M414T87	505581	638807	652099	400109	189939	755595	407814	471095	2.21109e+06	335319	1.42306e+06	1.03774e+06	1.90589e+06	652315	594043	966034		502630	488338	35.52	1.14069e+06	1.00188e+06	57.75	0.44	-1.18	0.0281274	1.55	0.216677	1.60343	414.046	87	1.4	Down
M415T374	23021.1	40843.5	15700.7	23003	87581.4	55891.3	41513.5	51556.7	22405.3	17533.8	8972.56	11129.4	15345.7	11522.9	10428.1	12268.3		42388.9	41178.5	54.78	13700.8	11895.6	32.6	3.09	1.63	0.000621601	3.21	0.0444681	2.20957	415.135	374.1	6.2	Up
M415T665	918361	1.44549e+06	1.2892e+06	192299	2.05236e+06	1.80493e+06	1.78996e+06	1.97581e+06	36996.7	1.74058e+06	131552	70511.4	555702	502544	1.12053e+06	612338		1.43355e+06	1.61773e+06	43.87	596344	529123	98.19	2.4	1.27	0.014763	1.83	0.158002	1.41163	415.18	664.9	11.1	Up
M416T693	2.03773e+06	2.13056e+06	1.55654e+06	1.5265e+06	1.6858e+06	2.00543e+06	2.46596e+06	2.16831e+06	416116	2.13693e+06	345682	285233	511252	1.33585e+06	1.19808e+06	883326		1.9471e+06	2.02158e+06	16.94	889058	697289	72.13	2.19	1.13	0.004662	2.33	0.0886941	1.95943	416.116	693.1	11.6	Up
M417T303	9380.47	11443.5	7392.14	7697.27	12310.5	7908.92	12683.8	8604.1	21885.7	14880.2	22197.4	31111.1	21130.9	7756.24	10634.3	15016.3		9677.58	8992.28	22.3	18076.5	18073.6	41.41	0.54	-0.9	0.014763	1.83	0.158002	1.83078	417.05	302.9	5	Down
M417T89_2	2.77554e+06	2.01503e+06	2.97283e+06	2.72278e+06	3.06e+06	2.68678e+06	3.22227e+06	2.7745e+06	3.01897e+06	3.33953e+06	3.00224e+06	2.80223e+06	3.34323e+06	2.89881e+06	4.29012e+06	3.21674e+06		2.77872e+06	2.77502e+06	12.96	3.23898e+06	3.11786e+06	14.47	0.86	-0.22	0.0281274	1.55	0.216677	1.57299	417.165	89.4	1.5	Down
M418T104	83320	127589	125312	137024	148693	136462	97177.7	144277	50900.5	64774.5	53598.4	12289.3	45359.7	65159	56235.3	92484.3		124982	132025	18.46	55100.1	54916.8	40.82	2.27	1.18	0.0003108	3.51	0.040447	2.01991	418.125	104.2	1.7	Up
M418T370	2194.56	1098.47	1799.49	4245.13	30748.3	1234.2	15354.5	3144.04	33985.8	25329.4	56531.9	21037.7	20484.6	1148.92	27077.2	26827.1		7477.34	2669.3	140.5	26552.8	26078.3	58.14	0.28	-1.83	0.0379176	1.42	0.250052	1.78193	418.164	370	6.2	Down
M418T86_1	7.239e+06	8.14704e+06	6.91981e+06	7.7837e+06	7.48457e+06	7.11521e+06	7.45358e+06	8.36762e+06	6.87569e+06	6.56983e+06	6.27595e+06	7.54245e+06	6.04439e+06	6.38833e+06	5.48323e+06	5.92812e+06		7.56381e+06	7.46908e+06	6.66	6.3885e+06	6332140	9.84	1.18	0.24	0.0029526	2.53	0.0725285	2.21546	417.995	86.1	1.4	Up
M418T92	276716	108179	229528	140590	291765	137683	108494	165187	392593	364223	327209	350407	406561	303157	289769	427122		182267	152889	40.47	357630	357315	13.8	0.51	-0.97	0.0003108	3.51	0.040447	2.34877	418.102	92.4	1.5	Down
M419T101	3.07918e+06	3.3831e+06	2.58202e+06	2.93163e+06	2.08982e+06	3.75908e+06	2.80137e+06	2.41585e+06	2.40256e+06	2.31815e+06	652371	2.35957e+06	1.73573e+06	2.13844e+06	2.51356e+06	3.07804e+06		2.88026e+06	2.8665e+06	18.57	2.1498e+06	2.33886e+06	33.1	1.34	0.42	0.0281274	1.55	0.216677	1.37156	419.133	101.4	1.7	Up
M419T303_1	4.40111e+06	4.8349e+06	3.86153e+06	4.48216e+06	4.37849e+06	4.88162e+06	5.20039e+06	3.98798e+06	2.02851e+06	5.5119e+06	1.46032e+06	1.73155e+06	2.27327e+06	3.71571e+06	4.34923e+06	3.67299e+06		4.50352e+06	4.44164e+06	10.08	3.09294e+06	2.97313e+06	46.5	1.46	0.54	0.0206682	1.68	0.184282	1.61069	419.046	303.1	5.1	Up
M419T304	556681	751651	556126	915252	542301	647209	882639	893044	424316	417785	356090	485246	452285	585168	661178	757620		718113	699430	22.69	517461	468765	26.62	1.39	0.47	0.0379176	1.42	0.250052	1.76445	419.089	304.1	5.1	Up
M419T829	7.3219e+06	9.2248e+06	1.04857e+07	9.89773e+06	4.41754e+06	5.31703e+06	1.17459e+07	1.47788e+07	1.40513e+06	789465	1.90912e+06	5.01641e+06	1.70742e+06	1.93581e+06	2.44173e+06	1.58845e+06		9.14868e+06	9.56126e+06	37.23	2.09919e+06	1.80827e+06	60.53	4.36	2.12	0.0003108	3.51	0.040447	2.53692	419.255	829.4	13.8	Up
M419T86	2.48076e+06	1.05406e+06	1.8755e+06	1.15303e+06	1.58029e+06	1.04868e+06	1.45584e+06	1.30626e+06	1.82049e+06	2.73558e+06	2.90313e+06	2.80398e+06	1.81812e+06	1.52918e+06	2.92613e+06	1.06742e+06		1.4943e+06	1.38105e+06	32.7	2.2005e+06	2.27803e+06	33.02	0.68	-0.56	0.0498834	1.3	0.285686	1.5506	419.001	86.1	1.4	Down
M420T339	107352	121072	98261.6	124296	119755	128577	141322	122692	70303	113851	78567.3	70537.6	80355	67647.7	76157.7	75620.8		120416	121882	10.81	79130	75889.2	18.57	1.52	0.61	0.000621601	3.21	0.0444681	2.39346	420.106	339.4	5.7	Up
M420T423	68240.7	154010	71143.7	88091	186677	103546	135562	79780.1	53113.9	240682	70097	32457	37269.8	56758.1	80335.9	10846.1		110881	95818.4	39.09	72694.9	54936	98.13	1.53	0.61	0.0379176	1.42	0.250052	1.31857	420.18	423	7	Up
M420T85	1.10706e+06	1.18157e+06	1.37973e+06	1.06215e+06	1.83556e+06	1.55642e+06	1.56133e+06	1.5864e+06	3.11415e+06	3.41396e+06	3.60782e+06	2.199e+06	2.2741e+06	1.79274e+06	1.69846e+06	3.22563e+06		1.40878e+06	1.46807e+06	19.39	2.66573e+06	2.69413e+06	28.47	0.53	-0.92	0.000621601	3.21	0.0444681	2.31386	419.915	85	1.4	Down
M420T86_1	2.77265e+06	2.13565e+06	1.95183e+06	3.0146e+06	1.71263e+06	1.29689e+06	1.98527e+06	1.681e+06	3.71581e+06	1.83058e+06	3.15599e+06	3.09592e+06	2.68403e+06	2.57784e+06	2.19926e+06	3.03155e+06		2.06881e+06	1.96855e+06	27.64	2.78637e+06	2.85779e+06	21.31	0.74	-0.43	0.0281274	1.55	0.216677	1.54333	419.994	86.1	1.4	Down
M421T795_3	4.13214e+07	5.37253e+07	3.86856e+07	2.02997e+07	2.50607e+07	3.09232e+07	2.73867e+07	2.72285e+07	3.34662e+07	1.57088e+07	1.95619e+07	2.25866e+07	2.66453e+07	1.47127e+07	2.66251e+07	9.71798e+06		3.30789e+07	2.9155e+07	32.81	2.11281e+07	2.10742e+07	36.58	1.57	0.65	0.0206682	1.68	0.184282	1.61055	421.267	794.9	13.2	Up
M421T88	652778	660875	833290	405655	593293	462179	621229	617957	360221	93225.5	406752	346807	325616	377976	524016	307097		605907	619593	21.45	342714	353514	35.28	1.77	0.82	0.0010878	2.96	0.0513787	1.85029	421.017	88.2	1.5	Up
M422T312	1.14737e+06	770661	1.49153e+06	653143	1.36271e+06	1.52346e+06	1.23287e+06	1.54482e+06	795110	1.13768e+06	745727	220570	542097	449715	154629	253352		1.21582e+06	1.29779e+06	28.15	537360	495906	63.13	2.26	1.18	0.0029526	2.53	0.0725285	1.88697	422.087	311.9	5.2	Up
M422T69_1	7.05427e+06	6.26969e+06	6.05018e+06	9.51673e+06	7.70226e+06	6.04714e+06	7.45042e+06	7.01262e+06	5.19299e+06	3.69544e+06	6.07147e+06	6.25086e+06	5.02421e+06	7.17309e+06	5.79258e+06	3.86389e+06		7.13791e+06	7.03344e+06	16.08	5.38307e+06	5.49279e+06	22.11	1.33	0.41	0.014763	1.83	0.158002	1.88324	422.077	68.9	1.1	Up
M422T69_2	1.39947e+07	1.87162e+07	1.83897e+07	1.94205e+07	1.60341e+07	1.74715e+07	1.89459e+07	1.85773e+07	1.65517e+07	1.25758e+07	1.60237e+07	1.84009e+07	1.37813e+07	1.71269e+07	1.51207e+07	1.33266e+07		1.76937e+07	1.84835e+07	10.32	1.53634e+07	1.55722e+07	13.17	1.15	0.2	0.0206682	1.68	0.184282	1.70374	422.092	68.9	1.1	Up
M422T806	1.10636e+06	1.6242e+06	1.16465e+06	1.17839e+06	1.22911e+06	926769	1.61288e+06	1.54655e+06	543467	470185	811398	583182	654633	402100	587274	781432		1.29861e+06	1203751	20.14	604209	585228	23.41	2.15	1.1	0.0001554	3.81	0.0365579	2.47309	422.29	805.7	13.4	Up
M423T121	2.37929e+06	2.18662e+06	3.14991e+06	2.74862e+06	2.37558e+06	2.1969e+06	2.46154e+06	1.12805e+06	3.32167e+06	3.28326e+06	2.9693e+06	3.05616e+06	2.78081e+06	2.8398e+06	3.03891e+06	2.41577e+06		2.32831e+06	2.37743e+06	24.9	2.96321e+06	3.00411e+06	9.83	0.79	-0.35	0.0104118	1.98	0.130233	1.56745	423.028	121.5	2	Down
M423T302	120025	90656.7	90641.4	108327	81265.5	87119.2	81373.9	84374.1	76209.9	89614.4	69175.3	81863.6	84662	76819.4	84930.7	51612.8		92972.8	88880.3	14.98	76861	79341.5	15.63	1.21	0.27	0.0379176	1.42	0.250052	1.55139	423.042	302.3	5	Up
M423T69_3	2.92883e+06	3.38654e+06	2.70996e+06	2.1258e+06	5.41171e+06	2.09159e+06	2.58589e+06	2.09558e+06	5.57035e+06	3.49785e+06	5.26036e+06	3.76787e+06	4.39963e+06	2.78411e+06	4.41923e+06	3.55076e+06		2.91699e+06	2.64792e+06	37.95	4.15627e+06	4.08375e+06	22.61	0.7	-0.51	0.014763	1.83	0.158002	1.7778	423.091	68.9	1.1	Down
M423T810	1.91319e+06	3.31567e+06	2.24599e+06	2.48378e+06	4.69398e+06	2.89438e+06	2.52389e+06	2.55478e+06	774418	418731	2.90346e+06	4.0226e+06	1.12049e+06	1.10001e+06	876801	1.59294e+06		2.82821e+06	2.53934e+06	30.43	1.60118e+06	1.11025e+06	77.03	1.77	0.82	0.0498834	1.3	0.285686	1.7858	423.263	809.9	13.5	Up
M423T85_2	3.63796e+06	1.76682e+06	2.00572e+06	2.86185e+06	3.61896e+06	2.59728e+06	3.52772e+06	3.45387e+06	4.28809e+06	5.02297e+06	5.24361e+06	4.07567e+06	3.67573e+06	3.36965e+06	5.16621e+06	4.03293e+06		2.93377e+06	3.15786e+06	25.54	4.35936e+06	4.18188e+06	16.25	0.67	-0.57	0.0018648	2.73	0.0601903	2.06039	422.966	85.1	1.4	Down
M424T122	3.46156e+06	3.49327e+06	3.66657e+06	3.54691e+06	3.6904e+06	2.74405e+06	2.99269e+06	3.40287e+06	2.89969e+06	1.91733e+06	3.37083e+06	3.6395e+06	777910	2.81642e+06	2.56361e+06	689790		3.37479e+06	3.47742e+06	9.89	2.33438e+06	2.69001e+06	47.71	1.45	0.53	0.0206682	1.68	0.184282	1.49304	424.133	122.3	2	Up
M424T71	137760	196698	170156	274685	458229	138484	259030	84293.4	481595	451257	354887	432021	233068	201512	525078	349900		214917	183427	54.46	378665	393454	30.62	0.57	-0.82	0.0206682	1.68	0.184282	1.77648	424.03	70.8	1.2	Down
M424T756	5.60748e+06	5.18048e+06	2.37267e+06	5.18429e+06	5.70064e+06	2.71047e+06	4.85116e+06	5.79906e+06	391108	3.57457e+06	59590.2	347200	184975	2.67202e+06	4.31993e+06	3.5769e+06		4.67578e+06	5.18238e+06	29.02	1.89079e+06	1.53157e+06	96.04	2.47	1.31	0.00699301	2.16	0.1064	1.68426	424.124	756.1	12.6	Up
M425T124	271574	250845	255901	261812	263528	217480	273937	278316	257422	281980	306394	298980	244512	290996	327785	296292		259174	262670	7.41	288045	293644	9.26	0.9	-0.15	0.0379176	1.42	0.250052	1.58911	425.119	123.5	2.1	Down
M425T717	29807.9	47661.5	46229.3	9992.15	75667.8	18128.5	47364.4	37242.2	373286	213569	1.11419e+06	66004.3	343258	20165.2	145993	95143.4		39011.7	41735.7	52.23	296452	179781	119.35	0.13	-2.93	0.00699301	2.16	0.1064	1.99613	424.965	716.6	11.9	Down
M425T756	4.78609e+06	4.76861e+06	4.81108e+06	5.2336e+06	4.13763e+06	3.34515e+06	3.623e+06	3.90873e+06	2.19173e+06	769245	610215	3.21433e+06	3.09226e+06	4.762e+06	4.29451e+06	909795		4.32673e+06	4.45312e+06	15.46	2.48051e+06	2.642e+06	65.34	1.74	0.8	0.0104118	1.98	0.130233	1.77475	425.116	756	12.6	Up
M426T329	91888.7	376806	136853	260744	100583	185524	202567	105773	113584	86401	52952.9	20945.3	84374	180339	28997.8	223723		182592	161188	53.65	98914.5	85387.5	72.37	1.85	0.88	0.0498834	1.3	0.285686	1.48251	426.075	329.1	5.5	Up
M426T693_1	958051	1.05187e+06	245470	861007	8.5061e+06	496649	738906	1.35578e+06	8.52097e+06	4.4671e+06	9.31444e+06	4.1416e+06	4.57457e+06	2.60675e+06	4.74033e+06	2.85424e+06		1.77673e+06	909529	154.22	5.1525e+06	4.52083e+06	47.78	0.34	-1.54	0.004662	2.33	0.0886941	2.10067	426.141	693.1	11.6	Down
M426T96_3	3.29781e+07	3.09493e+07	3.58175e+07	2.39593e+07	1.88541e+07	2.28561e+07	1.88578e+07	4.03157e+07	4.14397e+07	2.80519e+07	7.71269e+07	7.72159e+07	4.17617e+07	3.65957e+07	2.49033e+07	2.55072e+07		2.80735e+07	2.74543e+07	28.76	4.40753e+07	3.90177e+07	48.72	0.64	-0.65	0.0498834	1.3	0.285686	1.30746	426.034	95.9	1.6	Down
M427T285	378475	44618.4	293184	22853.7	183649	161572	131873	164914	366081	706722	459144	395587	202359	360532	481711	61418.2		172642	163243	68.43	379194	380834	50.55	0.46	-1.14	0.0206682	1.68	0.184282	1.50109	427.081	285.3	4.8	Down
M427T722	205147	305001	121432	317827	446014	348745	287569	365314	265940	235416	250768	103438	110531	212640	197224	155117		299631	311414	33.22	191384	204932	32.51	1.57	0.65	0.0206682	1.68	0.184282	1.46469	427.209	721.7	12	Up
M427T96	3.34762e+07	2.78418e+07	2.71026e+07	2.04162e+07	2.27042e+07	2.54991e+07	2.59602e+07	2.02062e+07	2.2107e+07	2.03833e+07	1.66241e+07	5.60713e+06	2.19866e+07	1.97286e+07	2.65959e+07	2.52311e+07		2.54008e+07	2.57296e+07	17.19	1.97829e+07	2.11849e+07	32.96	1.28	0.36	0.0498834	1.3	0.285686	1.00695	427.027	95.8	1.6	Up
M428T300	39314.7	46023.2	51640.9	41392.1	42297.7	42556.8	49745.8	54336.9	42412.6	37159.3	42096	39136.8	43309	34093.2	12665.7	39609.4		45913.5	44290	11.84	36310.2	39373.1	27.6	1.26	0.34	0.0206682	1.68	0.184282	1.32752	428.213	299.8	5	Up
M429T269	77629.6	61312.5	64521.3	77733	63063.9	82901	75933	82341.6	84455.8	101927	82590.8	103775	91423.3	81493.3	76095.1	80679.7		73179.5	76781.3	12.05	87805	83523.3	11.66	0.83	-0.26	0.014763	1.83	0.158002	1.73363	429.016	268.7	4.5	Down
M429T303_1	4.38354e+06	6.61456e+06	6.62283e+06	1.12959e+07	4.82432e+06	7.8756e+06	6.30368e+06	5.68706e+06	3.92856e+06	4.73811e+06	863948	4.18531e+06	3.84765e+06	3.86866e+06	5.45796e+06	4.85926e+06		6.70094e+06	6.45912e+06	32.2	3.96868e+06	4.05694e+06	34.75	1.69	0.76	0.0029526	2.53	0.0725285	1.68146	429.073	303.2	5.1	Up
M429T615	311971	274770	214260	283871	279950	304992	279655	285091	43461.6	257141	98415.5	108044	75671.7	278847	280739	184593		279320	281911	10.51	165864	146319	58.39	1.68	0.75	0.00699301	2.16	0.1064	1.6866	429.157	614.9	10.2	Up
M430T101	1.13412e+06	1.1439e+06	1.14906e+06	1.14494e+06	1.02429e+06	1.1504e+06	1.0325e+06	1.13296e+06	922922	1.04608e+06	957960	1.10484e+06	1.02411e+06	1.06117e+06	1.06866e+06	884263		1.11402e+06	1.13901e+06	4.78	1.00875e+06	1.03509e+06	7.74	1.1	0.14	0.0104118	1.98	0.130233	1.89251	430.112	101	1.7	Up
M430T157	675103	533827	808649	614428	827947	727419	596370	731889	1.00015e+06	936336	983460	814222	682413	823827	802153	797222		689454	701261	15.05	854973	819025	12.72	0.81	-0.31	0.0206682	1.68	0.184282	1.87975	430.131	157.2	2.6	Down
M430T269	350989	357240	298363	375364	245888	328347	451893	288102	167047	194280	201223	196160	175254	259261	194316	238908		337023	339668	18.61	203306	195238	15.24	1.66	0.73	0.0003108	3.51	0.040447	2.43549	430.014	268.8	4.5	Up
M430T278	199129	311292	189321	151421	293899	225778	223043	219055	500415	464296	565164	273103	468386	228493	342144	360013		226617	221049	23.33	400252	412155	29.36	0.57	-0.82	0.0018648	2.73	0.0601903	2.16216	430.132	278.3	4.6	Down
M430T303	699336	924382	789106	870743	1.37729e+06	886170	1.19456e+06	1.02544e+06	682882	540947	562774	443192	552207	327619	553091	707243		970878	905276	22.84	546245	552649	22.25	1.78	0.83	0.0003108	3.51	0.040447	2.20939	430.076	303	5	Up
M430T659	87739.6	23429.7	75622.6	84570	40307.3	87247.9	43449	41544	27511.9	18950.6	15884.8	37022.4	62346.3	33910.6	39682.1	24093.9		60488.8	59535.8	42.83	32425.3	30711.3	45.44	1.87	0.9	0.014763	1.83	0.158002	1.67761	430.224	658.6	11	Up
M431T101	102740	133245	99029.5	118585	146874	164124	156059	163752	221257	245217	232291	167150	181327	148662	133255	262742		135551	140059	19.45	198988	201292	24.02	0.68	-0.55	0.00699301	2.16	0.1064	1.89413	431.119	101	1.7	Down
M431T303	2.04091e+06	743786	2.0104e+06	282800	771882	758858	426985	1.02418e+06	1.69131e+06	3.224e+06	3.07454e+06	1.91301e+06	1.4956e+06	1.30421e+06	2.7449e+06	1.28143e+06		1.00748e+06	765370	66.3	2.09113e+06	1.80216e+06	38.34	0.48	-1.05	0.0206682	1.68	0.184282	1.95569	431.075	303.1	5.1	Down
M431T738	283072	357271	237925	302432	76673.9	416276	226596	216135	1.12017e+06	179348	782312	615391	1.04243e+06	425604	384040	669979		264548	260498	38.65	652409	642685	49.73	0.41	-1.3	0.0104118	1.98	0.130233	1.72827	431.266	737.7	12.3	Down
M432T154	2.98077e+06	2.1476e+06	5.94678e+06	3.15018e+06	1.35745e+06	2.81529e+06	2.75777e+06	3.42309e+06	1.17769e+06	705615	1.06341e+06	5.02135e+06	808952	1.97924e+06	582554	891831		3.07237e+06	2.89803e+06	43.25	1.52883e+06	977621	96.5	2.01	1.01	0.0104118	1.98	0.130233	1.9395	432.106	153.6	2.6	Up
M432T284	249439	642164	315831	433183	504166	564669	401930	566542	192829	268057	332108	121719	154419	252057	311955	474732		459740	468675	29.26	263485	260057	42.75	1.74	0.8	0.014763	1.83	0.158002	1.77015	432.077	284.3	4.7	Up
M432T536	1.53539e+06	2.44664e+06	2.60774e+06	1.47112e+06	2.3804e+06	1.98063e+06	2.13298e+06	2.96022e+06	2.87256e+06	2.72084e+06	5.27427e+06	3.88447e+06	2.58769e+06	3.4557e+06	1.29149e+06	3.18292e+06		2.18939e+06	2.25669e+06	23.56	3.15874e+06	3.02774e+06	36.25	0.69	-0.53	0.0379176	1.42	0.250052	1.25987	432.222	535.9	8.9	Down
M432T674	69909.4	63714.2	103519	97128.1	101952	83112.5	99549.4	112762	60611.7	74879.8	54802.9	44311.7	52207.2	80616.1	44314	58764.6		91455.8	98338.7	18.99	58813.5	56783.8	22.42	1.56	0.64	0.0018648	2.73	0.0601903	2.12324	431.968	674.5	11.2	Up
M432T755_2	895739	990607	1.15335e+06	972750	904145	925285	951838	1.15123e+06	1.41934e+06	1.88393e+06	1.58518e+06	1.02646e+06	1.11953e+06	1.2263e+06	847893	1.21213e+06		993118	962294	10.41	1.2901e+06	1.21922e+06	25.55	0.77	-0.38	0.0379176	1.42	0.250052	1.62375	432.308	754.9	12.6	Down
M434T470	1.11348e+06	551008	791986	1.1367e+06	836646	1.49982e+06	2.71132e+06	468249	518415	1.11179e+06	309632	76073.7	588164	303278	355235	219619		1.13865e+06	975064	63.07	435276	332434	72.81	2.62	1.39	0.00699301	2.16	0.1064	1.7109	434.194	469.9	7.8	Up
M434T655	10156.7	5104.91	12884.3	2269.66	15372.6	10117.8	5879.1	9289.79	31006.3	61779	187174	45640.2	49196.4	7776.11	45705.7	24094.5		8884.36	9703.81	48.22	56546.5	45672.9	97.93	0.16	-2.67	0.0029526	2.53	0.0725285	2.2426	434.221	654.9	10.9	Down
M434T793_1	5.00797e+06	1.50975e+06	1.23768e+07	1.38049e+06	591363	1.31572e+06	1.26769e+06	2.67385e+06	9.32363e+06	1.7881e+06	6.19565e+06	4.99303e+06	6.53599e+06	7.36633e+06	6.06544e+06	5.84472e+06		3.26545e+06	1.44512e+06	120.28	6.01411e+06	6.13054e+06	35.56	0.54	-0.88	0.0281274	1.55	0.216677	1.6462	434.223	792.7	13.2	Down
M434T810	167709	485109	232127	255311	271999	265604	149376	161303	123312	102557	298354	258366	108990	111913	61253.2	152705		248567	243719	43.3	152181	117612	54.24	1.63	0.71	0.0498834	1.3	0.285686	1.59637	434.256	809.8	13.5	Up
M435T819	1.08571e+07	1.41415e+07	1.47252e+07	1.15553e+07	1.03665e+07	9.86466e+06	1.56236e+07	1.21132e+07	9.70642e+06	1.14432e+07	9.08229e+06	9.32475e+06	8.89614e+06	9.61211e+06	9.59946e+06	1.16393e+07		1.24059e+07	1.18342e+07	17.39	9.91297e+06	9.60579e+06	10.53	1.25	0.32	0.00699301	2.16	0.1064	1.75898	435.25	818.7	13.6	Up
M435T833	4.26902e+06	3.18358e+06	1.78865e+06	3.82231e+06	4.05407e+06	3.60737e+06	3.12784e+06	3.09606e+06	2.2639e+06	1.42694e+06	1.56151e+06	2.45996e+06	2.33436e+06	1.90518e+06	2.56271e+06	1.93481e+06		3.36861e+06	3.39548e+06	23.01	2.05617e+06	2.09935e+06	20.29	1.64	0.71	0.004662	2.33	0.0886941	2.1052	435.25	833.3	13.9	Up
M435T87	628599	745218	658468	897387	775047	625024	720114	676505	655994	567413	453974	621098	572377	632903	617962	613311		715795	698310	12.72	591879	615636	10.64	1.21	0.27	0.0018648	2.73	0.0601903	1.93956	435.053	87.4	1.5	Up
M436T120	38103.8	4.54017e+06	1.4679e+06	2.64025e+06	642915	908835	913480	957858	15806	18506.3	231735	17994.7	308172	390629	800545	243949		1.51369e+06	935669	94.76	253417	237842	104.28	5.97	2.58	0.004662	2.33	0.0886941	1.70436	436.055	119.7	2	Up
M436T122	1.50271e+06	595394	1.61885e+06	1.25638e+06	2.00907e+06	1.69366e+06	1.41082e+06	1.54616e+06	3.10571e+06	2.38519e+06	4.57431e+06	4.27196e+06	4.61911e+06	1.94118e+06	2.13076e+06	1.902e+06		1.45413e+06	1.52444e+06	28.26	3.11628e+06	2.74545e+06	38.51	0.47	-1.1	0.000621601	3.21	0.0444681	2.06716	436.1	122.4	2	Down
M436T325	48746.5	19629.9	44569.2	28015.7	26114.5	20182.2	29981.8	33414.6	52341	80011.6	95138.9	94242.5	38306.6	29479.9	65519.1	32387.4		31331.8	28998.8	33.78	60928.4	58930.1	44.1	0.51	-0.96	0.014763	1.83	0.158002	1.8658	436.171	325.1	5.4	Down
M437T800_1	513683	819249	581398	536457	102203	638870	232911	960635	211096	197670	166034	374104	440398	360959	327037	423751		548176	558928	51.25	312631	343998	34.2	1.75	0.81	0.0498834	1.3	0.285686	1.16156	437.257	800.2	13.3	Up
M437T836	3.30821e+06	3.0686e+06	3.75449e+06	1.99349e+06	4.32833e+06	2.79801e+06	2.72255e+06	1.39736e+06	1.20361e+06	3.16208e+06	1.3326e+06	1.11391e+06	2.1337e+06	2.50806e+06	2.20205e+06	815936		2.92138e+06	2.93331e+06	31.91	1.80899e+06	1.73315e+06	45.02	1.61	0.69	0.0281274	1.55	0.216677	1.4893	437.106	836.3	13.9	Up
M437T90	262800	189872	218338	208740	183407	263858	226697	256779	208343	146847	4276.44	252359	197542	193990	200138	161368		226311	222517	14.18	170608	195766	43.51	1.33	0.41	0.0498834	1.3	0.285686	1.02467	437.083	89.6	1.5	Up
M438T402_2	2.4594e+06	2.76621e+06	4.07301e+06	628520	2.98314e+06	1.51234e+06	1.10038e+06	1.01105e+06	1.05815e+06	67369.1	601099	884429	700976	849667	1.38125e+06	43555.3		2.06676e+06	1.98587e+06	57.64	698313	775322	66.06	2.96	1.57	0.0104118	1.98	0.130233	1.67554	438.096	401.7	6.7	Up
M439T321	299659	70452.6	253399	108162	103902	108550	262224	165629	290609	174087	385942	438447	142662	302689	280698	215099		171497	137090	51.29	278779	285654	36.19	0.62	-0.7	0.0379176	1.42	0.250052	1.54322	438.986	321.5	5.4	Down
M439T836	155386	209602	204711	251583	215541	233868	178250	204523	759433	264250	367536	420494	283038	216080	344011	188205		206683	207157	14.5	355381	313524	50.86	0.58	-0.78	0.0104118	1.98	0.130233	1.64444	439.103	836.4	13.9	Down
M439T85_2	846181	2.35496e+06	2.39044e+06	453258	1.46691e+06	787584	2.18984e+06	2.00205e+06	5.10852e+06	2.48221e+06	5.56328e+06	6.16022e+06	4.88174e+06	2.2018e+06	522498	2.10222e+06		1.5614e+06	1.73448e+06	49.92	3.62781e+06	3.68197e+06	56.34	0.43	-1.22	0.0379176	1.42	0.250052	1.35797	438.942	85.2	1.4	Down
M440T711	393345	358774	369291	341204	318314	1.01103e+06	80799.1	357070	659726	495626	645269	661816	915035	515118	494712	462622		403728	357922	65.52	606240	580194	24.66	0.67	-0.59	0.0104118	1.98	0.130233	1.39781	440.226	711.2	11.9	Down
M441T122_1	1.50933e+06	2.34966e+06	2.63766e+06	2.78602e+06	2.09001e+06	2.25998e+06	2.94112e+06	2.52138e+06	1.51407e+06	2.92043e+06	1.60924e+06	1.56715e+06	992153	2.11094e+06	1.77316e+06	1.33972e+06		2.38689e+06	2.43552e+06	18.89	1.72836e+06	1.58819e+06	33.51	1.38	0.47	0.0498834	1.3	0.285686	1.65525	441.133	122.2	2	Up
M441T126	67159.7	38936.4	77210	59140.2	116446	20616.2	39407.2	47620.5	110035	93091.9	190752	79937.4	59049.4	41134.1	116589	112129		58317	53380.3	50.55	100340	101563	45.12	0.58	-0.78	0.0498834	1.3	0.285686	1.63096	441.089	126.3	2.1	Down
M441T321	326205	305574	442450	292013	305914	335052	254991	233369	445316	423196	350785	266701	309407	391634	358872	452848		311946	305744	20.15	374845	375253	17.6	0.83	-0.26	0.0498834	1.3	0.285686	1.44304	440.98	321.5	5.4	Down
M441T69_1	1.99541e+06	2.67967e+06	1.92932e+06	2.42045e+06	1.79103e+06	2.02592e+06	2.55856e+06	2.00375e+06	3.20573e+06	2.0488e+06	4.33551e+06	3.17843e+06	2.97352e+06	3.08559e+06	2.92344e+06	3.14588e+06		2.17551e+06	2.01483e+06	15.08	3.11211e+06	3.11574e+06	19.95	0.7	-0.52	0.0010878	2.96	0.0513787	1.99893	441.063	69.4	1.2	Down
M441T746	967473	730076	2.11865e+06	2.1355e+06	1.35084e+06	2.52357e+06	1.78931e+06	2.06337e+06	536766	1.32644e+06	723368	392309	344787	1.14818e+06	959443	461899		1.70985e+06	1.92634e+06	36.87	736648	630067	50.13	2.32	1.21	0.0029526	2.53	0.0725285	1.99303	441.103	746	12.4	Up
M441T83	293370	149982	424070	195052	196423	239678	99368.9	290312	528556	307496	699982	526672	872593	508142	302630	210616		236032	218050	42.65	494586	517407	44.56	0.48	-1.07	0.004662	2.33	0.0886941	1.81418	440.803	83.5	1.4	Down
M442T746	324991	239568	328292	535340	355520	171590	589276	630041	115718	395705	137976	61434.5	84497.8	208028	330203	157287		396827	341906	42.34	186356	147632	63.86	2.13	1.09	0.0206682	1.68	0.184282	1.71195	442.105	746	12.4	Up
M442T81	1.73254e+06	1.39902e+06	1.74096e+06	822195	871162	845022	852430	1.52744e+06	1.81488e+06	1.54959e+06	2.19116e+06	1.79805e+06	1.80013e+06	937559	1.88398e+06	1.17501e+06		1.22385e+06	1.13509e+06	34.06	1.6438e+06	1.79909e+06	24.79	0.74	-0.43	0.0206682	1.68	0.184282	1.43958	442.016	81.3	1.4	Down
M443T308	28212.8	23641.7	25368.2	23073.8	17108.1	25007.8	24368.5	24019.3	25136.3	27832.8	29920.7	25501.4	23819.4	28035.2	28097.4	25636.3		23850	24193.9	13.17	26747.4	26734.5	7.57	0.89	-0.17	0.0379176	1.42	0.250052	1.42884	442.978	308	5.1	Down
M443T657	147082	73331.8	111911	77143.5	113317	76712.6	84673.6	93785.3	275470	105331	124199	165463	314160	59839.4	243183	170582		97244.5	89229.5	26.14	182279	168023	48.4	0.53	-0.91	0.0379176	1.42	0.250052	1.669	443.225	657	10.9	Down
M443T789	3.94497e+06	3.49877e+06	6.03686e+06	9.32727e+06	1.29262e+07	5.68949e+06	1.18961e+07	1.00877e+07	4.43696e+06	2.15158e+06	3.11114e+06	4.04311e+06	3.27778e+06	1.07777e+07	5.56961e+06	1.28675e+06		7.92592e+06	7.68207e+06	45.6	4.33182e+06	3.66044e+06	67.47	1.83	0.87	0.0379176	1.42	0.250052	1.62074	443.036	789.1	13.2	Up
M444T262	28283.7	49564.8	47872.6	50730.5	53507.7	50386.9	45716.6	63791.9	43491.5	49212.1	24388.2	5921.27	21421.6	34689.9	23467.4	33678.4		48731.8	49975.8	20.3	29533.8	29033.3	46.36	1.65	0.72	0.004662	2.33	0.0886941	1.50854	444.03	261.6	4.4	Up
M444T343	341348	222143	299630	523938	417672	412211	427142	434369	361911	332575	296245	154527	213844	230502	347225	148466		384807	414941	24.27	260662	263374	32.79	1.48	0.56	0.0206682	1.68	0.184282	1.57819	444.108	342.5	5.7	Up
M444T344	75147.3	134037	88203.3	30065.5	134625	121187	179845	138210	71250	64500.7	89036.2	60795.5	47964.8	65310.3	77516.7	108840		112665	127612	41.1	73151.8	68280.1	25.69	1.54	0.62	0.0498834	1.3	0.285686	1.05207	444.126	344.4	5.7	Up
M445T363	100219	322006	97905	48012.5	462197	321915	54204.5	55809.5	509389	487517	536885	468116	134502	503293	455627	432987		182784	99062.1	88.13	441040	477816	29.05	0.41	-1.27	0.0029526	2.53	0.0725285	1.8776	445.127	363.2	6.1	Down
M446T102	62290.6	52054.7	82203.3	56186.8	50629.1	60437.7	100874	68152.8	90239.7	85105.6	85463.8	87810.9	92286.1	81465.5	96595.2	107152		66603.6	61364.2	25.71	90764.9	89025.3	8.94	0.73	-0.45	0.0104118	1.98	0.130233	2.04328	446.228	102.4	1.7	Down
M446T363	70687.2	84272.5	85594.1	74368.1	78648.6	61796.4	79278.5	70794.8	67659.6	49219.2	71462.9	77833.6	51030.3	56244.6	61008.5	52487.4		75680	76508.4	10.44	60868.2	58626.5	17.23	1.24	0.31	0.0104118	1.98	0.130233	1.87959	446.134	363.1	6.1	Up
M446T837	310440	358084	435539	509167	505140	207040	297223	410443	1.85552e+06	623852	835673	1.07534e+06	658562	412701	699651	366616		379134	384263	27.92	815989	679107	58.37	0.46	-1.11	0.00699301	2.16	0.1064	1.82241	446.268	836.5	13.9	Down
M446T85	2.27145e+06	1.92159e+06	2.72932e+06	1.01105e+06	1.19338e+06	1.27963e+06	1.41343e+06	1.3514e+06	363118	146402	965005	450106	1.09711e+06	1.27445e+06	475175	434000		1.64641e+06	1.38242e+06	36.47	650671	462641	62.08	2.53	1.34	0.0010878	2.96	0.0513787	2.04292	445.879	84.6	1.4	Up
M447T124	234042	174850	188041	179163	259395	199393	200119	261100	516934	446692	807158	394032	449997	163630	367377	407788		212013	199756	16.41	444201	427240	40.41	0.48	-1.07	0.0104118	1.98	0.130233	2.17365	447.117	124.2	2.1	Down
M447T376	20523.1	75118.6	28448.4	20197.9	17032.5	39137.6	52157.6	136941	198238	50795.8	150901	46506.7	170416	94792	51493.5	257502		48694.6	33793	83.62	127581	122847	61.85	0.38	-1.39	0.0206682	1.68	0.184282	1.71627	447.117	376	6.3	Down
M447T840	1.0165e+06	1.86036e+06	1.31334e+06	1.0265e+06	1.88363e+06	560836	1.35963e+06	1.35795e+06	334848	1.30789e+06	230277	660874	372293	970708	423331	263357		1.29734e+06	1.33564e+06	34.02	570447	397812	67.53	2.27	1.19	0.0029526	2.53	0.0725285	1.99944	447.238	840	14	Up
M447T99	2.26517e+06	1.02982e+06	1.11751e+06	2.20189e+06	2.18935e+06	941688	1.74274e+06	1.23066e+06	883434	1.58126e+06	1.01172e+06	941033	1.0228e+06	858750	673256	1.4316e+06		1.58985e+06	1.4867e+06	36.05	1.05048e+06	976379	28.97	1.51	0.6	0.0206682	1.68	0.184282	1.42935	446.963	98.8	1.6	Up
M448T126	126583	138252	146203	204727	113368	184854	183707	167448	107027	123225	95465	74620.5	74336.7	105067	103150	97560.2		158143	156825	20.23	97556.6	100355	16.91	1.62	0.7	0.0003108	3.51	0.040447	2.28746	448.194	125.6	2.1	Up
M448T89_1	2.34698e+06	3.15497e+06	4.01077e+06	4.13214e+06	4.63315e+06	4.70154e+06	4.64602e+06	3.35825e+06	5.18151e+06	1.78095e+06	1.01054e+07	5.352e+06	4.32502e+06	8.7877e+06	5.68208e+06	8.14188e+06		3.87298e+06	4.07146e+06	21.95	6.16957e+06	5.51704e+06	43.66	0.63	-0.67	0.0281274	1.55	0.216677	1.16156	448.112	89	1.5	Down
M449T116	105533	142295	112451	109851	73665.8	119320	113764	117758	32640.3	60769.9	32855	34019.8	31940.6	82998	65636.3	63785		111830	113108	16.98	50580.6	47394.8	39.64	2.21	1.14	0.0003108	3.51	0.040447	2.34626	449.048	115.7	1.9	Up
M449T385	11445.6	24395.9	4848.14	11032.4	157435	122541	69361	202482	269974	189008	284420	96207.9	154165	11501.3	298564	128187		75442.7	46878.5	101.38	179003	171587	56.62	0.42	-1.25	0.0498834	1.3	0.285686	1.38637	449.177	384.6	6.4	Down
M450T506	305533	81221.6	35779.4	117159	124947	116412	406213	404721	16716.1	75034	19379.3	31615.4	19510.8	40444.9	27340.3	48262		198998	121053	75.05	34787.8	29477.8	56.42	5.72	2.52	0.0010878	2.96	0.0513787	2.16077	450.205	505.9	8.4	Up
M450T537	19422	16122.9	49323.9	61684.2	68548.5	46739.2	59179.7	60775.1	10566.2	8631.33	13300.5	16684.2	10452.1	22626.4	19072.5	8477.8		47724.4	54251.8	41.4	13726.4	11933.3	38.05	3.48	1.8	0.0018648	2.73	0.0601903	2.34362	450.205	536.6	8.9	Up
M450T68	163579	421278	399558	165338	129123	174563	151624	154322	60977.8	377619	79586.5	81185.2	58927.7	117861	108150	347157		219923	164458	53.87	153933	94667.5	84.79	1.43	0.51	0.0379176	1.42	0.250052	1.0965	450.08	68.3	1.1	Up
M451T422	1357.4	3308.34	2505.92	2731.05	2237.32	4725.7	6633.5	4912.81	11841.1	4783.77	8069.43	8436.3	7260.96	2774.26	7163.17	5792.74		3551.51	3019.7	48.88	7015.22	7212.06	38.46	0.51	-0.98	0.00699301	2.16	0.1064	1.72102	451.064	422.2	7	Down
M452T111	120174	164943	155734	182033	157496	205352	214364	240575	101696	121542	89078.4	45444.9	66420.6	178819	149696	172878		180084	173488	21.4	115697	111619	42.23	1.56	0.64	0.0206682	1.68	0.184282	1.65367	452.233	111.5	1.9	Up
M453T71	703395	832045	1.08684e+06	693778	648168	1.0912e+06	848865	959724	578867	678363	639550	828822	786477	687200	557974	666228		858001	840455	20.32	677935	672295	13.71	1.27	0.34	0.014763	1.83	0.158002	1.71773	453.005	70.9	1.2	Up
M453T84	1.44843e+06	1.39721e+06	1.20973e+06	2.19235e+06	1.80153e+06	1.17052e+06	1.5156e+06	1.48576e+06	1.03992e+06	780034	1.27075e+06	1.3119e+06	864593	1.41425e+06	1.32492e+06	804432		1.52764e+06	1.4671e+06	21.72	1.10135e+06	1.15534e+06	23.58	1.39	0.47	0.014763	1.83	0.158002	1.84742	452.921	84.2	1.4	Up
M454T660	43312.3	99292.4	113193	39488.6	129627	121958	56512.5	40397.9	363973	46511.9	136172	344381	363284	109704	136735	52066.4		80472.8	77902.4	48.82	194103	136454	71.75	0.41	-1.27	0.0498834	1.3	0.285686	1.29214	454.287	660.3	11	Down
M455T551	34317.5	240718	38615.1	14144.6	39777.4	32001.7	28671.3	48884.9	531980	168862	753572	1.0103e+06	577422	259604	21672.5	299043		59641.3	36466.3	123.82	452808	415512	72.31	0.13	-2.92	0.0104118	1.98	0.130233	1.98146	455.144	551	9.2	Down
M455T741_2	1.01676e+06	659072	1.09036e+06	624973	505275	1.46878e+06	1.22306e+06	2.88984e+06	717421	525472	402474	652123	539936	465192	347129	403095		1.18476e+06	1.05356e+06	64.42	506605	495332	25.39	2.34	1.23	0.00699301	2.16	0.1064	1.95138	455.363	741.3	12.4	Up
M455T776	524314	1.42794e+06	857306	453497	1.39417e+06	1.43999e+06	765649	1.63413e+06	1.98451e+06	1.83631e+06	1.94288e+06	1.72363e+06	2.15522e+06	1.44853e+06	1.5154e+06	1.64166e+06		1.06213e+06	1.12574e+06	43.64	1.78102e+06	1.77997e+06	13.66	0.6	-0.75	0.000621601	3.21	0.0444681	1.86566	455.289	775.6	12.9	Down
M455T78_1	2.67835e+07	1.38619e+07	5.63858e+07	4.97132e+07	5.35286e+07	2.15688e+07	4.89323e+07	2.88513e+07	1.1443e+07	1.237e+07	4.93736e+07	1.17647e+07	1.14881e+07	2.71856e+07	2.55324e+07	2.42806e+07		3.74532e+07	3.88918e+07	43.94	2.16797e+07	1.83253e+07	60.71	1.73	0.79	0.0379176	1.42	0.250052	1.36579	454.97	77.7	1.3	Up
M455T78_3	1.68421e+06	1.69055e+06	1.95868e+06	814061	1.37026e+06	1.13024e+06	1.11024e+06	1.03203e+06	953085	443843	758522	1.11933e+06	785250	968762	1.1453e+06	406176		1.34878e+06	1.25025e+06	29.29	822534	869167	34.17	1.64	0.71	0.014763	1.83	0.158002	1.77281	454.995	77.7	1.3	Up
M456T498	168300	264583	254889	89505.9	452837	171863	179347	246468	661119	520159	772408	1.24098e+06	473291	217998	181245	403356		228474	212908	47.14	558820	496725	60.99	0.41	-1.29	0.014763	1.83	0.158002	1.75289	456.197	498.5	8.3	Down
M456T654	141907	218275	202730	201658	214913	243979	206394	221677	94193.3	161217	70718.5	74436.9	68620.2	150087	130184	111562		206442	210653	14.25	107627	102877	33.98	1.92	0.94	0.000621601	3.21	0.0444681	2.30596	456.205	653.7	10.9	Up
M457T498	139846	39398.5	45471.3	76448.2	412391	93803.2	27826.4	36141.9	191754	493906	697152	160397	528980	40093.8	141725	297977		108916	60959.8	117.72	318998	244865	71.94	0.34	-1.55	0.014763	1.83	0.158002	1.74754	457.202	498.3	8.3	Down
M457T724	150802	472796	146049	294549	549205	335160	312926	210848	17921.8	89527.8	45116.5	99434.3	38103.4	32812.3	25365	16177.5		309042	303737	46.84	45557.3	35457.8	69.85	6.78	2.76	0.0001554	3.81	0.0365579	2.53477	456.971	723.5	12.1	Up
M458T298	92540.7	75303.2	76716.5	83390.4	101275	101611	86305.4	106635	96205.3	156422	155463	80522.6	115644	110805	120095	105132		90472.2	89423.1	13.17	117536	113225	22.7	0.77	-0.38	0.0206682	1.68	0.184282	1.77016	457.585	298.5	5	Down
M459T310_1	40560.3	30579.1	40580	31497.7	40605.7	31119.9	47358	32315.6	54037	43558.6	51954.3	31516.5	36665.4	43785.8	51999.6	45492.5		36827	36437.9	16.98	44876.2	44639.1	17.55	0.82	-0.29	0.0379176	1.42	0.250052	1.61572	458.577	310.2	5.2	Down
M459T537	26869.4	67981.1	24593.2	78833.3	36938.6	98103.3	52815.3	53928.5	304476	423657	290886	181566	342489	25923.1	178127	137695		55007.8	53371.9	46.82	235602	236226	54.25	0.23	-2.1	0.00699301	2.16	0.1064	2.00362	459.122	536.8	8.9	Down
M459T68	164162	88881.1	144535	111240	99117.4	107654	105517	143065	10332.2	105090	57156.9	41684.2	39691.6	80433.8	109640	78887.8		120522	109447	22.01	65364.6	68022.3	52.57	1.84	0.88	0.004662	2.33	0.0886941	1.61674	459.076	67.8	1.1	Up
M461T124	311458	265424	198933	202922	741413	273294	205186	199966	1.21168e+06	1.0237e+06	1.88681e+06	965452	776932	178874	964374	294512		299825	235305	61.18	912792	964913	58.49	0.33	-1.61	0.0206682	1.68	0.184282	1.92001	461.108	124.1	2.1	Down
M461T310_2	115799	84511.1	108596	84546.3	63666.3	98528.2	57035.8	88515.3	124833	97002.7	162634	169600	161805	128971	109684	159472		87649.8	86530.8	23.15	139250	144221	19.87	0.63	-0.67	0.0018648	2.73	0.0601903	2.07913	461.116	310.1	5.2	Down
M461T366	24519.7	113947	32466.4	89950.2	41582.2	45200.9	196526	155243	238321	224380	787748	237424	183117	261455	168974	197625		87429.4	67575.5	72.43	287381	230902	71.17	0.3	-1.72	0.000621601	3.21	0.0444681	2.02685	461.169	366	6.1	Down
M461T72_1	384039	85002.4	99026.3	30672.4	13163.6	10821.8	36669.4	31259.1	315450	249935	548693	395895	469645	517718	445975	400193		86331.7	33964.3	144.17	417938	423084	23.93	0.21	-2.28	0.000621601	3.21	0.0444681	2.36308	461.007	71.5	1.2	Down
M462T108	188177	323924	458521	404303	192693	557105	599765	576520	217731	323473	403567	208037	177170	305932	143456	322376		412626	431412	40.09	262718	261832	33.9	1.57	0.65	0.0498834	1.3	0.285686	1.39967	462.127	107.8	1.8	Up
M462T322	160577	172925	183704	147511	100343	154531	108816	124114	47628.7	110348	49888.3	42862.4	41142.4	119411	106175	77322.2		144065	151021	20.91	74347.4	63605.3	44.77	1.94	0.95	0.0029526	2.53	0.0725285	2.05693	461.591	321.7	5.4	Up
M462T434	1.05233e+06	833001	721158	1.3213e+06	1.6433e+06	1.26107e+06	1.57458e+06	1.10805e+06	263513	660946	6939.32	256326	210021	468606	445277	570622		1.18935e+06	1.18456e+06	27.5	360281	354395	59.46	3.3	1.72	0.0001554	3.81	0.0365579	1.81939	462.214	434.4	7.2	Up
M463T559	265223	92382.2	158275	153607	207228	116210	105558	184317	82789.8	80569.2	195946	111409	83446.8	108055	85484.7	107765		160350	155941	36.05	106933	96625	35.76	1.5	0.58	0.0379176	1.42	0.250052	1.44538	463.21	558.6	9.3	Up
M463T735	1.29146e+06	1.56117e+06	1.99941e+06	895582	1.07274e+06	1.65771e+06	1.33115e+06	1.81497e+06	564402	754963	843056	298705	750302	824216	1.22665e+06	902337		1.45302e+06	1.44616e+06	25.74	770579	789589	34.66	1.89	0.92	0.0010878	2.96	0.0513787	1.9215	463.225	735.3	12.3	Up
M463T741	1.43636e+06	1.47638e+06	1.40165e+06	1.39894e+06	1.7546e+06	902816	697501	1.4433e+06	218273	917667	270573	156922	153956	1.15306e+06	938612	851345		1.31394e+06	1.41901e+06	25.99	582551	560959	72.01	2.26	1.17	0.00699301	2.16	0.1064	1.80404	462.962	740.7	12.3	Up
M463T778	2.41428e+06	3.02005e+06	2.25468e+06	2.18985e+06	1.44308e+06	3.85309e+06	3.75429e+06	2.43573e+06	1.73986e+06	2.1459e+06	618757	1.49303e+06	1.32474e+06	2.11342e+06	587146	2.41911e+06		2.67063e+06	2.425e+06	30.77	1.55524e+06	1.61644e+06	44.23	1.72	0.78	0.0104118	1.98	0.130233	1.73878	463.229	778.3	13	Up
M464T312	34114.8	193531	35778.6	135929	131903	120009	143393	124366	2231.02	101936	2847.58	1000.65	3451.71	75450	62318.3	24117.9		114878	128135	47.25	34169.1	13784.8	117.25	3.36	1.75	0.004662	2.33	0.0886941	1.7981	464.108	311.9	5.2	Up
M465T123	8.04813e+06	2.02573e+07	1.19325e+07	1.2415e+07	7.80192e+06	1.47523e+07	1.43952e+07	1.05647e+07	6.85139e+06	7.43396e+06	7.19548e+06	6.38395e+06	7.69301e+06	7.59429e+06	7.33219e+06	8.51747e+06		1.25209e+07	1.21738e+07	32.34	7.37522e+06	7.38308e+06	8.5	1.7	0.76	0.000621601	3.21	0.0444681	2.17343	465.104	122.7	2	Up
M465T78	905576	849738	529026	933173	1.37748e+06	969027	929653	703849	309837	321176	497183	791383	535777	532482	363609	390491		899690	917614	27.01	467742	443837	34.06	1.92	0.94	0.0018648	2.73	0.0601903	2.26096	464.936	77.9	1.3	Up
M465T808	974682	751544	853976	859508	814102	831613	443482	759836	469416	445475	581966	717528	622427	870388	707294	375111		786093	822858	19.69	598701	602196	27.57	1.31	0.39	0.0498834	1.3	0.285686	1.50338	465.229	807.6	13.5	Up
M466T114	228976	199398	240930	162528	99521.9	272598	139044	297062	132671	84753.1	134242	127574	139039	140371	176072	136412		205007	214187	33.09	133892	135327	18.53	1.53	0.61	0.0206682	1.68	0.184282	1.64949	466.061	113.9	1.9	Up
M466T323	178835	178561	180475	167216	94873.2	150253	161819	133066	457.397	95843	17067.5	15290.1	409.163	128184	127793	76168		155637	164517	18.94	57651.6	46617.8	96.54	2.7	1.43	0.0010878	2.96	0.0513787	1.59201	465.589	323.2	5.4	Up
M466T75	881187	861227	1.03975e+06	917138	1.0946e+06	1.2478e+06	1.29677e+06	1.26581e+06	1.71356e+06	2.20183e+06	2.03507e+06	1.38278e+06	1.55783e+06	1.16867e+06	1.24775e+06	2.00721e+06		1.07554e+06	1.06718e+06	16.68	1.66434e+06	1.6357e+06	23.34	0.65	-0.63	0.004662	2.33	0.0886941	2.16572	465.995	74.6	1.2	Down
M467T108	526806	597883	654636	659658	614906	656587	602109	641303	405837	675956	367215	437078	426974	549244	539398	574390		619236	628104	7.24	497012	488238	20.99	1.25	0.32	0.0281274	1.55	0.216677	1.78132	466.541	107.8	1.8	Up
M467T708	2.51691e+06	1.87712e+06	3.16105e+06	3.04978e+06	1.18938e+06	1.96182e+06	1.92251e+06	1.95626e+06	7.46142e+06	1.99009e+06	6.3816e+06	4.3344e+06	6.06412e+06	2.85185e+06	2.45582e+06	2.79446e+06		2.20435e+06	1.95904e+06	30.02	4.29172e+06	3.59313e+06	48.67	0.51	-0.96	0.0206682	1.68	0.184282	1.69282	467.224	708.5	11.8	Down
M467T723	752837	1.58512e+06	1.3916e+06	949967	5.41825e+06	1.56137e+06	1.1181e+06	2.08132e+06	181015	979511	406370	416184	202838	253548	320385	217776		1.85732e+06	1.47649e+06	80.63	372203	286967	70.19	4.99	2.32	0.000621601	3.21	0.0444681	2.3153	467.224	723.3	12.1	Up
M467T85_1	7.95353e+06	8.38264e+06	1.21016e+07	9.77304e+06	7.90973e+06	1.04892e+07	1.08753e+07	9.56591e+06	1.32915e+07	8.69138e+06	1.23138e+07	1.33726e+07	9.40942e+06	1.14529e+07	1.3774e+07	1.23423e+07		9.63137e+06	9.66947e+06	15.57	1.1831e+07	1.2328e+07	15.86	0.81	-0.3	0.0281274	1.55	0.216677	1.51294	466.977	85.3	1.4	Down
M468T535	68401.9	71707.7	244539	247525	209674	105608	172250	234270	152814	58933.8	64458.9	70096.1	144280	56380.9	114506	69020.6		169247	190962	45.44	91311.4	69558.4	43.54	1.85	0.89	0.0281274	1.55	0.216677	1.54746	468.178	535.5	8.9	Up
M468T73	133016	88639.8	97700.1	100990	58894.2	163820	94044.3	118330	68325.1	54021.3	66467.9	74115.4	87125.5	46216.5	55524.6	39654.9		106929	99345.2	29.52	61431.4	60996.3	25.29	1.74	0.8	0.0018648	2.73	0.0601903	2.07711	468.057	72.5	1.2	Up
M469T75	795509	1.06704e+06	1.07378e+06	1.61029e+06	529600	488286	1.51422e+06	1.15242e+06	2.34506e+06	2.24382e+06	2.89337e+06	2.15875e+06	1.61837e+06	2.80473e+06	2.93912e+06	1.68512e+06		1.02889e+06	1.07041e+06	40.04	2.33604e+06	2.29444e+06	22.14	0.44	-1.18	0.0001554	3.81	0.0365579	2.23269	469.059	75.1	1.3	Down
M469T88	749815	578942	425576	655917	656848	625595	909813	938034	476203	540504	558279	491186	523942	648831	554492	565444		692567	656383	24.53	544860	547498	9.7	1.27	0.35	0.0206682	1.68	0.184282	1.47296	469.137	88.2	1.5	Up
M470T291	29586.2	30951.8	19486.8	24703.5	25578.2	32958.9	39933.2	26457.1	47845.5	52270.9	45855.2	35193.4	41581.6	20405.6	30887.2	76020.8		28707	28021.6	21.47	43757.5	43718.4	37.88	0.66	-0.61	0.0281274	1.55	0.216677	1.61424	470.035	290.6	4.8	Down
M471T327_1	105877	182042	140390	127421	190732	168701	176363	229710	536633	247444	432840	233573	507090	137069	195855	243195		165155	172532	23.78	316712	245320	48.05	0.52	-0.94	0.00699301	2.16	0.1064	1.77844	470.625	327.4	5.5	Down
M471T86_2	5.8097e+06	5.36321e+06	5.5976e+06	5.59452e+06	5.44093e+06	5.61104e+06	5.63165e+06	5.81193e+06	6.0539e+06	5.92403e+06	5.90904e+06	6.23131e+06	5.8799e+06	5.66297e+06	5.53357e+06	5.65272e+06		5.60757e+06	5.60432e+06	2.79	5.85593e+06	5.89447e+06	3.93	0.96	-0.06	0.0206682	1.68	0.184282	1.54358	471.009	86.4	1.4	Down
M472T334	85140.2	76401.6	98889.9	35635.6	59228.2	54607.2	52925.9	47767.7	48783.2	15378.2	35346.3	60253.6	35178.6	48508.1	51581.4	15370.4		63824.5	56917.7	33.08	38800	41927.2	42.91	1.64	0.72	0.0281274	1.55	0.216677	1.61455	472.15	333.7	5.6	Up
M472T85_2	4.88679e+06	2.9938e+06	1.02177e+07	2.29845e+06	5.0052e+06	2.34263e+06	1.99543e+06	4.29354e+06	4.81043e+06	7.26778e+06	2.59455e+07	4.2318e+06	4.63652e+06	7.67473e+06	1.20588e+07	5.49201e+06		4.25419e+06	3.64367e+06	63.26	9.01469e+06	6.3799e+06	80.96	0.47	-1.08	0.0498834	1.3	0.285686	1.67189	471.937	84.9	1.4	Down
M472T94_2	3.55429e+06	3.31942e+06	3.80377e+06	3.31701e+06	2.78335e+06	2.76479e+06	2.75244e+06	3.10644e+06	2.37516e+06	2.161e+06	2.4501e+06	2.71129e+06	2.90437e+06	2.82014e+06	2.70934e+06	2.38052e+06		3.17519e+06	3.21173e+06	12.4	2.56399e+06	2.57972e+06	10.1	1.24	0.31	0.004662	2.33	0.0886941	2.03318	472.187	94.2	1.6	Up
M472T98	3.05536e+06	4.05733e+06	2.68396e+06	4.14413e+06	2.79741e+06	3.93103e+06	5.04965e+06	4.61794e+06	1.5282e+06	1.45872e+06	1.73603e+06	28471.8	1.20809e+06	1.83421e+06	2.48633e+06	2.70862e+06		3.7921e+06	3.99418e+06	22.81	1.62358e+06	1.63211e+06	50.64	2.34	1.22	0.0003108	3.51	0.040447	1.38462	472.052	98.1	1.6	Up
M473T834_1	1.16907e+08	2.34625e+08	1.28552e+08	1.03355e+08	1.62458e+08	1.01062e+08	5.38989e+07	3.92817e+07	2.72618e+08	4.2004e+08	2.78987e+08	1.82111e+08	4.14566e+08	2.42208e+08	1.59826e+08	3.46365e+08		1.17517e+08	1.10131e+08	52.35	2.8959e+08	2.75803e+08	33.76	0.41	-1.3	0.0010878	2.96	0.0513787	2.15105	473.278	834.5	13.9	Down
M473T834_2	1.82962e+08	1.52727e+08	2.53676e+08	1.85713e+08	1.42437e+08	1.82754e+08	5.64727e+07	4.0767e+07	1.89652e+08	4.40822e+08	1.90167e+08	1.33124e+08	2.97868e+08	2.25564e+08	3.4568e+08	2.42647e+08		1.49689e+08	1.6774e+08	47.19	2.5819e+08	2.34105e+08	38.41	0.58	-0.79	0.0206682	1.68	0.184282	1.61315	473.289	834.5	13.9	Down
M474T800_1	2.6867e+06	9.44189e+06	2.34355e+06	1.539e+07	6.56392e+06	6.35856e+06	5.7739e+06	4.78235e+06	2.79471e+06	1.02953e+06	5.45681e+06	3.55597e+06	2.73076e+06	723293	2.14235e+06	928695		6.66761e+06	6.06623e+06	62.81	2.42026e+06	2.43655e+06	66	2.75	1.46	0.014763	1.83	0.158002	1.90937	474.256	800.3	13.3	Up
M474T800_2	9.99357e+06	2.63235e+07	8.6177e+06	4.62816e+06	2.83602e+07	1.00247e+07	7.49269e+06	7.93808e+06	5.38535e+06	4.93488e+06	4.53225e+06	4.84684e+07	5.33394e+06	2.22499e+06	3.99355e+06	2.39191e+06		1.29223e+07	9.30564e+06	70.23	9.65816e+06	4.73356e+06	162.86	1.34	0.42	0.0281274	1.55	0.216677	1.25867	474.267	800.3	13.3	Up
M475T84_1	2.75094e+06	1.64321e+06	1.46102e+06	1.37382e+06	1.29063e+06	1.47212e+06	1.00656e+06	1.23215e+06	969149	1.00052e+06	1.14639e+06	1.34454e+06	1.17643e+06	999778	1.04014e+06	1.26091e+06		1.52881e+06	1.41742e+06	34.58	1.11723e+06	1.09326e+06	12.29	1.37	0.45	0.0104118	1.98	0.130233	1.51161	474.837	83.7	1.4	Up
M476T381	10719	5841.68	13315.3	6141.29	37891.7	8273.46	7527.42	9372.47	95049.2	70307.3	131621	48317.5	63367.8	6657.97	61882.9	55730.6		12385.3	8822.97	85.54	66616.8	62625.4	54.21	0.19	-2.43	0.004662	2.33	0.0886941	2.25914	476.17	380.6	6.3	Down
M476T480_2	131168	15984.7	97469.2	4382.64	15680	15918.8	7038.13	11176.4	190248	160624	195791	276230	493078	6232.49	50889	32289.6		37352.2	15799.4	129.95	175673	175436	90.4	0.21	-2.23	0.0281274	1.55	0.216677	1.67156	476.214	480	8	Down
M476T829_1	2.35114e+08	2.01202e+08	2.68125e+08	3.38111e+08	4.02268e+07	3.3581e+08	1.43321e+08	1.95255e+08	3.71814e+07	2.23229e+07	5.07314e+07	7.26248e+07	9.58184e+07	3.40017e+07	1.02294e+08	5.86829e+07		2.19645e+08	2.18158e+08	45.22	5.92072e+07	5.47072e+07	49.16	3.71	1.89	0.0029526	2.53	0.0725285	2.15636	476.262	829.2	13.8	Up
M477T696_2	209369	234412	204279	217819	456938	194502	186006	285357	374696	547408	732384	508141	456775	121697	603401	320417		248585	213594	36.06	458115	482458	40.91	0.54	-0.88	0.0281274	1.55	0.216677	1.65029	477.177	696.4	11.6	Down
M477T798	2.27547e+06	2.33687e+06	1.65791e+06	2.72128e+06	2.6276e+06	2.3192e+06	3.33259e+06	2.28399e+06	864789	882818	897060	1.62199e+06	1.00762e+06	2.39133e+06	942293	780098		2.44436e+06	2.32804e+06	19.55	1173501	919676	47.51	2.08	1.06	0.0029526	2.53	0.0725285	2.40535	477.302	798.4	13.3	Up
M478T105_1	299063	371619	421737	573975	265574	234381	503291	476765	804972	765039	989099	713102	553323	1.03055e+06	969215	642566		393301	396678	30.91	808484	785006	21.49	0.49	-1.04	0.0003108	3.51	0.040447	2.29478	477.56	105.3	1.8	Down
M478T119	377467	1.20848e+06	383855	370590	1.02194e+06	326500	306295	325491	243975	152698	565690	1.1202e+06	241062	265293	182067	279530		540078	374029	66.57	381315	254634	84.94	1.42	0.5	0.0498834	1.3	0.285686	1.07114	478.054	119	2	Up
M478T347	89840.6	99379.9	85828.3	73968.9	53896.2	80227.8	80520.5	62066	9196.93	77300.1	8848.04	6918.68	9910.32	17777.5	21017.7	73516.6		78216	80374.2	18.84	28060.7	13843.9	105.61	2.79	1.48	0.0029526	2.53	0.0725285	2.03419	478.071	347.4	5.8	Up
M478T69	119810	118576	111264	96472.4	88747.2	113049	108464	107331	168573	123492	103906	144104	131853	124435	132711	114699		107964	109864	9.85	130472	128144	15.01	0.83	-0.27	0.0104118	1.98	0.130233	1.69563	478.005	68.5	1.1	Down
M478T70_2	1.9962e+06	2.02313e+06	2.00107e+06	2.06689e+06	2.34448e+06	1.64846e+06	1.8173e+06	2.12558e+06	2.67977e+06	1.93524e+06	2.75943e+06	2.84046e+06	3.09966e+06	1.97305e+06	2.47491e+06	2.47727e+06		2.00289e+06	2.0121e+06	10.27	2.52997e+06	2.57852e+06	16.13	0.79	-0.34	0.0379176	1.42	0.250052	1.85228	478.124	70.4	1.2	Down
M478T97	4.98342e+06	1.0112e+07	8.05549e+06	4.21034e+06	8.44316e+06	4.44862e+06	8.94836e+06	7.12184e+06	4.78444e+06	3.25384e+06	5.47475e+06	5.76683e+06	5.44143e+06	4.30423e+06	4.42381e+06	3.46377e+06		7.04041e+06	7.58866e+06	31.78	4.61414e+06	4.60412e+06	20.21	1.53	0.61	0.0498834	1.3	0.285686	1.70515	478.105	97.3	1.6	Up
M479T73	377641	360036	325815	459573	449342	295150	445043	446228	67206.3	302536	101476	70890.6	85509.7	284383	230570	276991		394854	411342	16.17	177445	166023	59.31	2.23	1.15	0.0003108	3.51	0.040447	2.01219	479.075	72.8	1.2	Up
M480T114	3892.87	3864.54	25101	18552.3	494862	204367	132550	19847.9	762575	550405	1.11934e+06	282440	167173	39114.1	194237	141125		112880	22474.5	151.12	407051	238339	91.86	0.28	-1.85	0.0206682	1.68	0.184282	1.71853	480.078	113.9	1.9	Down
M480T317	9523	6757.53	1631.07	23821.6	6634.34	5865.23	13331.3	7239.48	18669.8	6750.3	17818.2	37825.5	17435.7	41471.4	18763.7	21019.4		9350.45	6998.51	71.81	22469.3	18716.8	51.06	0.42	-1.26	0.0206682	1.68	0.184282	1.61854	480.163	317.4	5.3	Down
M480T84_2	2.78939e+06	3.31678e+06	3.32778e+06	2.83086e+06	2.37817e+06	3.05818e+06	2.74527e+06	2.77007e+06	2.18502e+06	1.99482e+06	2.22927e+06	1.77935e+06	2.0137e+06	2.4206e+06	2.46402e+06	2.08915e+06		2.90206e+06	2.81013e+06	10.99	2.14699e+06	2.13708e+06	10.61	1.35	0.43	0.000621601	3.21	0.0444681	2.33773	479.926	84.4	1.4	Up
M480T97	616134	132686	394477	384302	672700	135794	399691	489927	1.12251e+06	389560	1.27748e+06	707944	407154	680046	538140	887064		403214	397084	48.76	751238	693995	43.13	0.54	-0.9	0.0206682	1.68	0.184282	1.66136	480.119	96.9	1.6	Down
M481T285	447554	379425	586443	461314	395200	605339	495675	580512	170745	398144	137673	116381	112197	463510	371837	497717		493933	478495	17.87	283525	271291	58.18	1.74	0.8	0.0281274	1.55	0.216677	1.72885	481.045	285.5	4.8	Up
M481T623_2	620818	385772	655587	523757	180998	489883	564008	624316	717008	627899	602080	688038	682281	863233	654435	660605		505642	543883	31.14	686947	671443	11.6	0.74	-0.44	0.0029526	2.53	0.0725285	1.4634	480.632	623	10.4	Down
M481T623_3	166256	254571	326194	444630	336411	210885	258612	283728	65461.4	68774.5	187245	67641.7	204871	284387	301713	99534.7		285161	271170	29.94	159953	143390	61.51	1.78	0.83	0.0379176	1.42	0.250052	1.72374	481.124	623.1	10.4	Up
M481T792_1	1.24128e+07	1.02242e+07	9.30441e+06	1.40307e+07	7.62096e+06	1.45037e+07	2.22274e+07	1.18091e+07	2.15111e+06	9.20212e+06	6.14294e+06	1.00429e+06	1.71716e+06	1.06881e+07	5.09488e+06	7.38083e+06		1.27667e+07	1.2111e+07	35.04	5.42268e+06	5.61891e+06	66.28	2.35	1.24	0.0018648	2.73	0.0601903	1.80914	481.222	792.2	13.2	Up
M481T792_2	4.73128e+07	7.53511e+07	6.5506e+07	9.51942e+07	4.85402e+07	8.88739e+07	5.56209e+07	7.48773e+07	1.08065e+07	5.45103e+07	1.66102e+07	4.45432e+06	8.49245e+06	4.11774e+07	3.14418e+07	4.37846e+07		6.89096e+07	7.01917e+07	25.94	2.64097e+07	2.4026e+07	71.24	2.61	1.38	0.000621601	3.21	0.0444681	1.94006	481.232	792.2	13.2	Up
M481T81_1	498170	413111	378430	335801	700355	376465	520502	529060	894066	830767	1.56271e+06	1.33681e+06	1.07504e+06	647862	671193	608778		468987	455640	25.26	953403	862416	36.41	0.49	-1.02	0.0010878	2.96	0.0513787	2.20763	481.133	81.1	1.4	Down
M483T113	699.482	986.816	2514.68	5937.3	15786.2	26016.3	8387.53	26675.4	686.748	463.696	724.402	1904.67	40173.8	491.033	197.982	713.435		10875.5	7162.42	98.59	5669.48	700.09	246.07	1.92	0.94	0.0379176	1.42	0.250052	1.54314	483.109	113	1.9	Up
M483T114	78496.5	100294	122687	111185	83547	92623.8	101152	76452	72135.6	84337.4	11129.1	62992.8	66538.5	62231.2	77774.6	102519		95804.5	96458.7	16.93	67457.2	69337	39.07	1.42	0.51	0.0206682	1.68	0.184282	1.32085	483.094	114.3	1.9	Up
M483T487	117555	123441	107828	124618	79419.2	132852	110716	65653.9	75965	81176.9	60342.1	71971.4	112085	74631.6	61368.8	46978.9		107760	114136	21.74	73065	73301.5	26.27	1.47	0.56	0.014763	1.83	0.158002	1.87088	483.16	487.5	8.1	Up
M483T608	64931	80141	80506.7	58478	61262.9	42301.8	53478.4	94404.2	78173.1	88962.2	144851	273298	110456	61041.5	65740.3	96294.8		66938	63096.9	25.31	114852	92628.5	60.41	0.58	-0.78	0.0379176	1.42	0.250052	1.43859	483.219	608	10.1	Down
M483T665_1	932569	1.48072e+06	766422	540905	1.20103e+06	831475	1.18809e+06	719784	607304	655210	719248	747861	728640	621826	844149	512210		957624	882022	32.29	679556	687229	15.02	1.41	0.49	0.0379176	1.42	0.250052	1.48953	483.167	665.2	11.1	Up
M483T665_2	284507	426202	268578	641706	281894	289403	502553	329867	50078.2	41089.5	164713	174660	35669.5	169693	172647	97115.3		378089	309635	35.69	113208	130914	56.47	3.34	1.74	0.0001554	3.81	0.0365579	2.32698	483.18	665.3	11.1	Up
M483T768	41411	38002.6	70742.2	31215.8	23557.6	35904.3	60644.7	24949	65478.3	74631.1	159313	41412	115043	35478.4	94925.4	185450		40803.4	36953.5	41.04	96466.4	84778.2	55.97	0.42	-1.24	0.0104118	1.98	0.130233	1.94958	483.374	768.4	12.8	Down
M484T111	140449	84044	111677	79834.3	99942.5	60464.4	106202	60331.8	122566	225388	184494	195917	110950	106703	164866	105544		92868.2	91993.3	29.35	152054	143716	30.74	0.61	-0.71	0.0104118	1.98	0.130233	1.96589	484.146	110.9	1.8	Down
M484T447_2	20584.2	1635.24	3629.05	1280.78	205484	65831.2	48787.1	83360.7	30886.2	234530	313340	451025	160527	287793	153509	353866		53824	34685.6	127.86	248185	261162	53.23	0.22	-2.21	0.004662	2.33	0.0886941	1.89092	484.187	446.8	7.4	Down
M484T808	966370	833937	1.63772e+06	1.0036e+06	1.25922e+06	1.59869e+06	1.46528e+06	1.22531e+06	931053	1.11608e+06	1.0614e+06	842660	1.07288e+06	925076	714022	757095		1.24877e+06	1.24226e+06	24.08	927533	928065	16.12	1.35	0.43	0.0379176	1.42	0.250052	1.63244	484.307	807.9	13.5	Up
M485T374	118958	136236	159923	300706	113157	99611.2	102784	151721	33614.3	31798.8	108845	88028.7	623616	101006	40263	33519.8		147887	127597	44.31	132586	64145.8	151.64	1.12	0.16	0.0281274	1.55	0.216677	1.24219	484.97	374.2	6.2	Up
M485T554	1133.58	34161.1	18532	489.121	36473.8	6344.89	25584.9	4916.54	89701.1	1552.23	47796.5	26577.6	56597.8	18507.6	48313.6	106125		15954.5	12438.5	92.51	49396.4	48055	71.21	0.32	-1.63	0.0379176	1.42	0.250052	1.30569	485.239	554.1	9.2	Down
M485T748	1.1732e+06	1.86531e+06	906001	1.91595e+06	1.84144e+06	1.57443e+06	2.62655e+06	1.26044e+06	147085	2.14947e+06	335297	253065	273855	595188	780072	588417		1.64542e+06	1.70794e+06	32.85	640306	461857	100.91	2.57	1.36	0.00699301	2.16	0.1064	1.99439	485.268	748.4	12.5	Up
M485T78_2	2.58511e+06	1.88079e+06	2.60117e+06	1.62376e+06	2.14853e+06	2.27401e+06	2.17407e+06	2.25427e+06	2.44387e+06	3.62817e+06	3.92076e+06	3.2261e+06	2.93971e+06	3.37676e+06	3.02741e+06	3.62643e+06		2.19271e+06	2.21417e+06	14.97	3.27365e+06	3.30143e+06	14.34	0.67	-0.58	0.000621601	3.21	0.0444681	2.39149	484.996	77.7	1.3	Down
M485T794	1.18325e+07	6.83515e+06	7.30604e+06	4.72684e+06	5.55484e+06	7.32589e+06	6.25842e+06	5.38648e+06	2.17099e+07	1.47266e+07	2.22035e+07	1.14064e+07	1.73162e+07	5.87808e+06	1.12717e+07	2.67258e+07		6.90327e+06	6.54678e+06	31.88	1.64048e+07	1.60214e+07	42.11	0.42	-1.25	0.00699301	2.16	0.1064	2.2074	485.274	794.4	13.2	Down
M485T85	3.1039e+06	4.95135e+06	2.9202e+06	3.92855e+06	3.30898e+06	4.12701e+06	3.98949e+06	4.17e+06	30666.2	3.51794e+06	17299.5	21712.5	9321.91	2.26473e+06	2.16277e+06	2.28934e+06		3.81244e+06	3.95902e+06	17.51	1.28922e+06	1.09672e+06	110.2	2.96	1.56	0.0010878	2.96	0.0513787	1.74646	484.947	85.2	1.4	Up
M485T99	1.99877e+06	2.63173e+06	2.37251e+06	1.61017e+06	1.80764e+06	2.22765e+06	1.95833e+06	560553	2.21728e+06	2.29831e+06	2.66333e+06	2.81263e+06	2.3931e+06	2.30499e+06	2.30506e+06	3.31826e+06		1.89592e+06	1.97855e+06	33.15	2.53912e+06	2.34908e+06	14.81	0.75	-0.42	0.0206682	1.68	0.184282	1.38786	485.107	99.2	1.7	Down
M486T75	461003	380704	439680	296313	446292	397739	448082	519387	444540	583374	568447	529529	519237	512497	532227	610130		423650	442986	15.62	537498	530878	9.44	0.79	-0.34	0.004662	2.33	0.0886941	2.06545	486.031	75.5	1.3	Down
M486T85	3.90102e+06	5.11733e+06	4.5042e+06	4.88404e+06	3.90511e+06	5.04961e+06	4.67956e+06	4.42769e+06	3.30117e+06	2.81557e+06	2.84363e+06	3.04536e+06	2.86645e+06	3.03241e+06	3.03267e+06	3.32556e+06		4.55857e+06	4.59188e+06	10.33	3.03285e+06	3.03254e+06	6.46	1.5	0.59	0.0001554	3.81	0.0365579	2.68684	485.987	85.4	1.4	Up
M487T150	154330	1.01302e+06	828795	964902	972498	1.34091e+06	1.2284e+06	1.33103e+06	283079	722387	215184	744009	362642	706134	568153	795890		979236	992760	39	549685	637144	41.88	1.78	0.83	0.0104118	1.98	0.130233	1.32753	487.183	149.6	2.5	Up
M487T374_1	1.51114e+06	2.58591e+06	1.88611e+06	2.02284e+06	1.59553e+06	2.2476e+06	2.04935e+06	2.08701e+06	2.9376e+06	2.61511e+06	2.27617e+06	3.05152e+06	3.10283e+06	2.24944e+06	2.5354e+06	2.16246e+06		1.99819e+06	2.03609e+06	17.24	2.61632e+06	2575251	14.39	0.76	-0.39	0.0029526	2.53	0.0725285	1.78614	486.963	374.2	6.2	Down
M487T374_2	2.39272e+06	2.9122e+06	1.95852e+06	3.47848e+06	3.03636e+06	3.42182e+06	4.10758e+06	3.28162e+06	1.34236e+06	2.33374e+06	1.57191e+06	1.08819e+06	1.24284e+06	1.43397e+06	1.21196e+06	1.18482e+06		3.07366e+06	3.15899e+06	21.76	1.42622e+06	1.2926e+06	27.84	2.16	1.11	0.0003108	3.51	0.040447	2.46226	486.976	374.1	6.2	Up
M487T94	243424	380993	317679	352668	390305	331484	446856	409366	229576	270024	264364	211729	143518	269805	237649	257970		359097	366830	17.48	235579	247809	18.13	1.52	0.61	0.0018648	2.73	0.0601903	2.14312	487.237	93.8	1.6	Up
M488T150	153431	1.00831e+06	384010	572616	731012	958833	336844	420103	687525	27529.7	389558	92238.9	298252	56114.1	18402	221342		570645	496360	53.57	223870	156791	103.28	2.55	1.35	0.0206682	1.68	0.184282	1.72105	488.113	149.6	2.5	Up
M488T324	46465.9	3996.05	9455.33	6045.64	24035.4	4440.53	51876.2	23856.9	34248.7	23837.9	52944.4	54319.8	22857.3	63919.9	52195.4	35939.8		21271.5	16656.1	89.53	42532.9	44067.6	36.06	0.5	-1	0.0379176	1.42	0.250052	1.72415	488.175	323.6	5.4	Down
M488T816	302045	670513	233950	642850	339348	445024	619480	350272	487259	151893	204802	203063	301148	264759	298489	474790		450435	397648	38.02	298275	281624	41.5	1.51	0.59	0.0498834	1.3	0.285686	1.45708	488.29	816.3	13.6	Up
M489T150	131036	219593	229743	238319	253490	245275	145391	244795	150315	129762	129002	156969	99642.3	23726.7	95003.2	170058		213455	234031	22.36	119310	129382	39.15	1.79	0.84	0.004662	2.33	0.0886941	1.67059	489.11	149.5	2.5	Up
M489T381	67987.9	52222.7	62651.3	52548.7	50989.3	69574.4	52156.5	68562.4	48625.9	64707.5	44318.8	50081.5	49683.5	47976.6	57813.9	48401.4		59586.7	57600	14.09	51451.2	49154.7	12.75	1.16	0.21	0.014763	1.83	0.158002	1.37833	489.201	381	6.3	Up
M489T486	38105.2	51894.2	49012.4	42556.3	68672.9	68509.1	70428.5	60757.7	79950.2	67153.6	69762.9	79900.6	80109.2	67547.7	67280.4	90466.6		56242.1	56326	22.43	75271.4	74831.7	11.42	0.75	-0.42	0.0206682	1.68	0.184282	1.85247	489.301	486	8.1	Down
M489T696	576330	755581	1.43518e+06	946355	1.69641e+06	1.52945e+06	1.30861e+06	1.43829e+06	529853	400514	434054	519278	802995	633504	710161	996777		1.21078e+06	1.37189e+06	33.17	628392	581678	32.07	1.93	0.95	0.00699301	2.16	0.1064	2.00694	489.17	696.3	11.6	Up
M490T374	1.48016e+06	722860	823312	1.68487e+06	1.51464e+06	1.77988e+06	1.73957e+06	1.64883e+06	687735	1.30545e+06	853466	646404	672752	660690	914786	877495		1.42427e+06	1.58174e+06	29.17	827347	770600	26.77	1.72	0.78	0.0104118	1.98	0.130233	1.86256	489.966	374.1	6.2	Up
M490T77_2	664681	908793	795823	711702	818455	667197	707066	677660	1.33902e+06	594952	2.06824e+06	1.06837e+06	1.76777e+06	827457	799569	964843		743922	709384	11.85	1.17878e+06	1.01661e+06	43.37	0.63	-0.66	0.0281274	1.55	0.216677	1.57743	490.053	76.7	1.3	Down
M491T112	343109	221078	314741	570050	405272	215824	300026	282236	138674	143147	271433	337745	214299	326349	106577	141694		331542	307383	34.53	209990	178723	43.56	1.58	0.66	0.0379176	1.42	0.250052	1.70934	491.087	112	1.9	Up
M491T363	80920.8	109993	101648	100819	85713.3	124007	113643	112598	98057.8	36750	20462.7	112532	83867.1	100148	40230.6	97258.4		103668	105820	14.05	73663.4	90562.8	48.07	1.41	0.49	0.0379176	1.42	0.250052	1.54563	491.124	363.2	6.1	Up
M491T84	923655	789954	1.78454e+06	1.42967e+06	2.07324e+06	569208	1.20881e+06	918843	2.1631e+06	2.18166e+06	2.70586e+06	2.08342e+06	5.18078e+06	1.66374e+06	2.30682e+06	979431		1.21224e+06	1.06623e+06	42.72	2.4081e+06	2.17238e+06	51.1	0.5	-0.99	0.004662	2.33	0.0886941	1.80065	490.82	83.7	1.4	Down
M491T85_1	6.44399e+06	3.41977e+06	5.71796e+06	2.71129e+06	3.9898e+06	2.90137e+06	3.4052e+06	3.32208e+06	5.3014e+06	1.1215e+07	8.46734e+06	8.01769e+06	5.99209e+06	4.41903e+06	8.29503e+06	3.90224e+06		3.98893e+06	3.41249e+06	34.09	6.95123e+06	7.00489e+06	35.56	0.57	-0.8	0.0104118	1.98	0.130233	1.97041	490.934	85.1	1.4	Down
M492T394	23793.3	45556.6	26878.7	16734.5	17280.5	30961.2	17681.5	37704.2	56644	71003.1	163495	73407.8	40359.7	36855.1	40834.5	124354		27073.8	25336	38.78	75869.1	63823.6	59.86	0.36	-1.49	0.0018648	2.73	0.0601903	2.12134	492.108	394.2	6.6	Down
M492T71	105194	67082.1	64573	71502.1	61253.2	88558.3	62782.1	49824.4	57856.3	73056.8	113099	159269	159147	85824	119213	80781.4		71346.1	65827.5	24.53	106031	99461.4	36.24	0.67	-0.57	0.0498834	1.3	0.285686	1.48537	492.02	71.2	1.2	Down
M493T374	321923	208012	222135	351667	238071	199751	195469	157851	117431	88449.5	120390	124304	114993	176737	219621	88276.3		236860	215074	28	131275	118910	34.28	1.8	0.85	0.0029526	2.53	0.0725285	2.11867	492.965	374.2	6.2	Up
M494T387	7880.09	9399.66	9089.43	22606.3	16890.3	11327.4	10756.8	10209.4	44963	31219.2	53147.3	58643.7	47857.8	5731.66	9401.44	23977.7		12269.9	10483.1	40.54	34367.7	38091.1	58.17	0.36	-1.49	0.0498834	1.3	0.285686	1.57907	494.096	387.2	6.5	Down
M494T497	19585.4	24318.9	25850.4	30276.7	21577.2	24593.2	20510.8	21171.2	42648.9	25904.2	43242.4	46626	43659.3	33209.5	24555.8	37507.2		23485.5	22948.1	14.98	37169.2	40078.1	22.74	0.63	-0.66	0.0018648	2.73	0.0601903	2.05551	494.133	496.8	8.3	Down
M494T808_1	4.17443e+06	2.51408e+06	3.17664e+06	1.4451e+06	5.23089e+06	2.00348e+06	2.59102e+06	2.31944e+06	5.40413e+06	8.54162e+06	6.79613e+06	6.01649e+06	2.62398e+06	2.31146e+06	5.61043e+06	4.77832e+06		2.93189e+06	2.55255e+06	42.03	5.26032e+06	5.50728e+06	39.17	0.56	-0.84	0.0206682	1.68	0.184282	1.80576	494.286	807.8	13.5	Down
M495T122	1.21191e+06	1.0694e+06	1.21363e+06	925682	1.23786e+06	1.34472e+06	1.40868e+06	1.51822e+06	2.16277e+06	2.09653e+06	2.09539e+06	1.88814e+06	2.39603e+06	1.20236e+06	1.65943e+06	1.7572e+06		1.24126e+06	1225747	15.11	1.90723e+06	1.99176e+06	19.38	0.65	-0.62	0.004662	2.33	0.0886941	2.23571	495.103	121.9	2	Down
M495T295	221539	178376	116603	266387	270088	134482	141967	69793.2	61395.5	75147.2	62779.5	107319	75251.9	102927	107889	60055.4		174904	160172	41.44	81595.6	75199.6	25.86	2.14	1.1	0.0029526	2.53	0.0725285	2.03916	495.1	295	4.9	Up
M495T536	282796	304561	270660	280571	228339	289849	269316	256402	244139	254228	175465	292009	236471	128892	195777	256588		272812	275615	8.45	222946	240305	23.58	1.22	0.29	0.0379176	1.42	0.250052	1.49342	495.102	535.8	8.9	Up
M496T106	50010.1	36245.1	99072.6	103667	84555.4	64303.3	53564.5	49637.2	104320	94021.9	102205	158583	87298.6	76694.5	86280.4	71864.4		67631.9	58933.9	37.08	97658.4	90660.2	27.72	0.69	-0.53	0.0498834	1.3	0.285686	1.53414	496.116	106	1.8	Down
M496T295_2	36614.2	24650.9	17904	17866.2	38023.8	20369.4	3534.37	15061.1	10276.3	11665.9	12427.6	14678.1	11385.4	2661.21	20686.3	5546.38		21753	19136.7	52.2	11165.9	11525.7	49	1.95	0.96	0.0281274	1.55	0.216677	1.16433	496.1	295.1	4.9	Up
M496T665	210791	100274	128354	138758	201786	189775	58853.7	245830	74023.5	115024	71734.9	80396	61131.1	51778	37423.1	37948.3		159303	164266	39.58	66182.4	66433	38.47	2.41	1.27	0.004662	2.33	0.0886941	2.0557	496.04	664.7	11.1	Up
M497T286	400326	409168	338338	388476	279149	432316	562300	525981	317092	268409	246517	349446	266559	143175	34701.4	169717		417007	404747	22.12	224452	256538	45.81	1.86	0.89	0.0010878	2.96	0.0513787	1.75671	497.06	285.5	4.8	Up
M497T374_2	2.02919e+06	3.03953e+06	2.50667e+06	3.00255e+06	2.54315e+06	2.14372e+06	2.83529e+06	2.58281e+06	1.51094e+06	1.21838e+06	1.12554e+06	1.0911e+06	1.20639e+06	3.08575e+06	2.02242e+06	2.01723e+06		2.58536e+06	2.56298e+06	14.29	1.65972e+06	1.36466e+06	41.52	1.56	0.64	0.0104118	1.98	0.130233	1.9947	496.993	374.2	6.2	Up
M497T783	565207	1.68346e+06	915526	697889	61648.4	635494	3.01301e+06	611064	3.61291e+06	1.20486e+06	3.09097e+06	5.36333e+06	924421	749175	1.66332e+06	754828		1.02291e+06	666692	90.26	2.17048e+06	1.43409e+06	77.66	0.47	-1.09	0.0379176	1.42	0.250052	1.20429	497.269	783.5	13.1	Down
M497T98_1	976324	989669	1.1398e+06	464660	1.02261e+06	680400	735670	709535	634916	368279	608331	650946	559482	567129	557874	272555		839833	855997	26.95	527439	563305	25.56	1.59	0.67	0.004662	2.33	0.0886941	1.78878	497.093	98.2	1.6	Up
M498T327	59531.1	69322.4	51642.6	74282.8	32986.9	64008	56802.7	64595.3	51088.1	2957.2	28475.5	45491.1	39636.3	41272.5	25555.5	3933.38		59146.5	61769.6	21.5	29801.2	34055.9	61.31	1.98	0.99	0.0018648	2.73	0.0601903	1.70928	498.139	326.7	5.4	Up
M498T670	540402	304067	625372	738635	604872	1.19058e+06	753953	1.19854e+06	415879	525636	583197	329102	353855	499139	594096	574484		744553	682003	41.69	484423	512388	21.75	1.54	0.62	0.0281274	1.55	0.216677	1.36816	498.288	669.8	11.2	Up
M498T72_2	428388	300422	1.46054e+06	290876	167951	386982	283596	348842	1.75758e+06	327237	1.58289e+06	1.88799e+06	1.54041e+06	455659	402294	321207		458449	324632	89.94	1.03441e+06	998036	68.86	0.44	-1.17	0.0281274	1.55	0.216677	1.34741	498.078	71.7	1.2	Down
M498T803	1.45164e+06	941051	3.16883e+06	429883	5.39455e+06	1.77815e+06	1.90583e+06	1.99519e+06	1.75901e+07	1.1851e+07	1.57514e+07	1.05019e+07	1.2814e+07	674533	3.83203e+06	1.05475e+07		2.13314e+06	1.84199e+06	72.39	1.04453e+07	1.11993e+07	54.4	0.2	-2.29	0.0104118	1.98	0.130233	1.95334	498.257	802.8	13.4	Down
M499T400	16417.1	13581	8271.09	10214.3	35463	7343.78	8731.27	7147.63	43167.5	87829.2	46267	8857.19	9138.84	12529.7	59942.6	43920.8		13396.1	9472.79	70.81	38956.6	43544.1	71.42	0.34	-1.54	0.0281274	1.55	0.216677	1.73459	499.188	400.2	6.7	Down
M499T739_1	607020	454861	618414	1.25473e+06	597607	1.34055e+06	2.66691e+06	704285	807680	814505	303631	231759	416131	379277	478010	123177		1.03055e+06	661349	71.48	444271	397704	56.65	2.32	1.21	0.0281274	1.55	0.216677	1.67731	499.311	739.2	12.3	Up
M499T87_1	8.00978e+06	6.60302e+06	1.13062e+07	4.65452e+06	2.64011e+06	6.64473e+06	4.74234e+06	5.8044e+06	2.78409e+07	5.09406e+06	6.25704e+07	3.45037e+07	3.11043e+07	4.83572e+06	1.34334e+07	9.79212e+06		6.30063e+06	6.20371e+06	41.11	2.36468e+07	2.06371e+07	83.06	0.27	-1.91	0.0281274	1.55	0.216677	1.72679	499.047	86.7	1.4	Down
M500T739	35207.6	61463.3	31996.6	21638.3	5034.61	138428	32819.4	73412.4	472690	13130.1	387610	286085	631167	95382.3	94355.9	314905		50000	34013.5	83.37	286916	300495	73.66	0.17	-2.52	0.014763	1.83	0.158002	1.65719	500.315	739.1	12.3	Down
M501T363	62010.7	84265.7	92571.4	99938.9	83521.6	47881.5	97588	98661	28991.5	56825	64927.2	74266.5	60283.1	79166.4	58362.7	56752.4		83304.9	88418.6	22.74	59946.8	59322.9	25.06	1.39	0.47	0.0206682	1.68	0.184282	1.57748	501.064	363.2	6.1	Up
M501T374_2	351567	220813	415313	241089	180685	215727	237031	271237	352098	293583	725822	454097	402308	274390	227807	368602		266683	239060	29.37	387338	360350	39.98	0.69	-0.54	0.0379176	1.42	0.250052	1.48286	501	374.2	6.2	Down
M501T507_1	565048	125275	78542.9	65620.9	158170	22352.2	2880.05	37015	170267	193802	615349	609074	386322	3107.21	385808	465087		131863	72081.9	138.43	353602	386065	61.43	0.37	-1.42	0.0379176	1.42	0.250052	1.16534	501.207	506.5	8.4	Down
M501T507_2	99181.1	92229.9	21198	56062.9	93072.5	86041.3	105737	177235	157168	123067	117250	130702	115141	110266	112624	146072		91344.7	92651.2	48.68	126536	120159	13.44	0.72	-0.47	0.0104118	1.98	0.130233	1.33063	501.219	506.6	8.4	Down
M502T756_2	605299	854687	374385	523843	289835	924282	830965	773693	2.8241e+06	418146	1.71337e+06	1.92189e+06	2.70227e+06	1.13705e+06	629772	1.13041e+06		647124	689496	36.41	1.55963e+06	1.42521e+06	57.3	0.41	-1.27	0.0206682	1.68	0.184282	1.56694	502.146	756.1	12.6	Down
M502T829_2	2.31824e+07	2.88973e+07	2.77668e+07	9.99127e+06	8.4159e+07	6.52595e+06	2.57154e+07	2.09586e+07	9.27714e+07	4.54601e+07	1.15526e+08	6.22122e+07	5.8062e+07	7.82537e+06	3.05285e+07	4.81943e+07		2.83996e+07	2.44489e+07	84.35	5.75725e+07	5.31282e+07	58.94	0.49	-1.02	0.0379176	1.42	0.250052	1.38111	502.292	828.5	13.8	Down
M502T86_2	6.69289e+06	8.38108e+06	7.26306e+06	7.60598e+06	6.28508e+06	8.75942e+06	7.72221e+06	7.14328e+06	4.66083e+06	4.4899e+06	4.04165e+06	5.12926e+06	4.24188e+06	5.05804e+06	4.27104e+06	5.64958e+06		7.48162e+06	7.43452e+06	10.99	4.69277e+06	4.57536e+06	11.63	1.59	0.67	0.0001554	3.81	0.0365579	2.65289	501.972	85.5	1.4	Up
M503T829	2.28699e+06	4.3653e+06	5.38298e+06	2.02665e+06	7.24508e+06	1.1393e+06	2.02311e+06	4.18742e+06	2.13758e+07	1.65182e+07	2.4687e+07	4.83136e+06	1.19279e+07	1.03587e+06	6.62514e+06	1.02154e+07		3.5821e+06	3.23721e+06	57.92	1.21521e+07	1.10716e+07	67.63	0.29	-1.76	0.0281274	1.55	0.216677	1.70648	503.283	828.5	13.8	Down
M503T83	889437	940959	929176	879670	830986	882970	896571	755614	1.20028e+06	781293	1.4253e+06	1.00625e+06	1.12992e+06	955540	924713	941065		875673	886203	6.72	1.04555e+06	980893	19.14	0.84	-0.26	0.014763	1.83	0.158002	1.50949	502.626	82.6	1.4	Down
M505T402	41588.3	53610.3	64422.7	84145.8	45469.8	37849.8	50428.8	56597.8	81432.8	19611	39504.2	43623.6	25551	34067.4	29130.2	27649.9		54264.2	52019.5	27.19	37571.3	31598.8	51.43	1.44	0.53	0.0206682	1.68	0.184282	1.63598	505.07	401.7	6.7	Up
M505T756	148382	186427	230457	219008	81893.9	236609	172848	209559	571465	126278	443393	315815	569912	265490	157839	293558		185648	197993	27.77	342969	304686	49.8	0.54	-0.89	0.0498834	1.3	0.285686	1.39639	505.131	756	12.6	Down
M506T115	187585	150399	125841	155793	124204	149201	171809	143574	159170	184316	251380	237230	163428	205023	244028	133052		151051	149800	14.16	197203	194670	22.4	0.77	-0.38	0.0281274	1.55	0.216677	1.60989	505.573	115.2	1.9	Down
M507T363_1	49817	163068	70735	113073	804011	71322	204881	914874	2.09483e+06	1.30401e+06	2.68895e+06	1.18058e+06	1.88156e+06	123201	1.57395e+06	1.35879e+06		298973	138071	117.39	1.52573e+06	1.46637e+06	49.35	0.2	-2.35	0.0018648	2.73	0.0601903	2.05676	507.093	363.2	6.1	Down
M507T788	4.63359e+07	8.83247e+07	1.2888e+08	4.74285e+07	1.63385e+08	7.24883e+07	1.74806e+08	2.31558e+08	2.69496e+08	5.39795e+08	4.26303e+08	3.72792e+08	3.12635e+08	1.1278e+08	1.92104e+08	1.45957e+08		1.19151e+08	1.08602e+08	56.17	296482786	2.91066e+08	49.4	0.4	-1.32	0.0104118	1.98	0.130233	1.89617	507.29	788.4	13.1	Down
M508T617_1	472683	465891	397439	288773	619709	445634	638778	727395	344925	405178	652895	64588	354217	265438	251671	365935		507038	469287	28.38	338106	349571	49.01	1.5	0.58	0.0379176	1.42	0.250052	1.16999	508.174	617.3	10.3	Up
M508T788_2	1.96773e+07	2.40445e+07	9.79793e+06	7.81361e+06	1.17313e+07	9.92135e+06	1.20638e+07	9.37832e+06	8.90413e+06	2.79624e+06	8.70918e+06	7.4017e+06	6.26486e+06	9.03841e+06	1.8241e+07	1.23609e+06		1.30535e+07	1.08263e+07	43.8	7.82396e+06	8.05544e+06	65.39	1.67	0.74	0.014763	1.83	0.158002	1.40689	508.297	788.5	13.1	Up
M509T67	17282.7	15445.6	15179.9	14579.2	15355.8	19232.7	14773.8	17395	13948.2	14884.8	14792.9	14520.2	15851.4	13083.2	14128.7	13479.1		16155.6	15400.7	10.13	14336.1	14324.5	6.09	1.13	0.17	0.014763	1.83	0.158002	1.7029	509.059	67.1	1.1	Up
M509T788_2	2.72491e+08	1.82615e+08	2.71721e+08	7.68613e+07	8.86165e+07	1.03538e+08	1.29153e+08	1.14761e+08	7.30028e+07	1.9007e+07	4.44373e+07	9.53811e+07	6.86115e+07	8.26363e+07	1.22943e+08	1.22362e+07		1.5497e+08	1.21957e+08	50.95	6.47819e+07	7.08071e+07	58.32	2.39	1.26	0.00699301	2.16	0.1064	1.78924	509.275	788.5	13.1	Up
M510T363	106472	50353.6	442155	41480	154089	49393.2	346136	100422	27791.4	41975.4	20137	69647.7	23156.7	20030.9	18015.7	16053.6		161313	103447	93.43	29601.1	21646.9	61.24	5.45	2.45	0.0018648	2.73	0.0601903	2.05127	510.097	363	6	Up
M510T788	6.00661e+06	2.06186e+06	6.64895e+06	1.31019e+06	5.97619e+06	2.66797e+06	1.58308e+06	949265	2.249e+07	1.01414e+07	2.95412e+07	2.42365e+07	3.01608e+07	1.13728e+06	7.66153e+06	1.72829e+07		3.40051e+06	2.36492e+06	70.29	1.78315e+07	1.98865e+07	59.71	0.19	-2.39	0.00699301	2.16	0.1064	1.98356	510.278	788.5	13.1	Down
M511T788	1.12992e+06	993069	190024	1.38969e+06	6.66557e+06	1.82597e+06	2.29552e+06	2.55418e+06	310207	1.17171e+06	574504	44341.1	120859	40202.7	1.40081e+06	938502		2.13049e+06	1.60783e+06	92.99	575143	442355	93.27	3.7	1.89	0.0206682	1.68	0.184282	1.47281	511.279	788.3	13.1	Up
M511T839_1	8.69359e+07	3.8738e+07	6.77837e+07	2.51387e+08	1.34856e+07	1.20482e+08	2.03729e+08	1.11249e+08	5.25434e+07	2.96394e+07	8.24917e+06	9.17403e+06	2.51998e+07	4.14544e+07	6.12876e+07	1.41908e+07		1.11724e+08	9.90925e+07	72.22	3.02173e+07	2.74196e+07	66.16	3.7	1.89	0.014763	1.83	0.158002	1.76521	511.287	839	14	Up
M512T299	28220.2	33695.8	17797.9	43289	39764.6	16589.9	4993.05	10844.9	5438.05	3514.42	11134.7	31151.4	5903.9	10734	12992.7	2957.5		24399.4	23009	57.1	10478.3	8318.95	87.29	2.33	1.22	0.0379176	1.42	0.250052	1.63537	512.282	298.7	5	Up
M512T508_2	441928	280432	427830	582832	418239	330176	317292	269089	235265	175291	194344	337257	231206	307185	310118	193418		383477	374207	27.4	248011	233236	25	1.55	0.63	0.0104118	1.98	0.130233	1.96401	512.21	508.1	8.5	Up
M512T799_2	1.65443e+08	8.67638e+07	1.32725e+08	2.40382e+08	2.54522e+08	2.03094e+08	2.49326e+08	1.54352e+08	1.18048e+08	9.06596e+07	4.80382e+07	1.11004e+08	5.97754e+07	2.18879e+08	9.65344e+07	1.57995e+08		1.85826e+08	1.84268e+08	32.84	1.12617e+08	1.03769e+08	48.74	1.65	0.72	0.0379176	1.42	0.250052	1.65046	512.298	798.7	13.3	Up
M513T508	63938.1	77437.6	41107.1	82541.8	462992	127250	89517.9	125897	58611.9	73178.2	57151	3965.37	36692	31773.3	10840.8	30198.1		133835	86029.8	101.71	37801.3	34232.6	63.44	3.54	1.82	0.0018648	2.73	0.0601903	1.69036	513.215	508	8.5	Up
M513T813	6.47196e+06	4.60536e+06	6.86641e+06	7.55108e+06	2.52943e+06	3.23009e+06	3.90663e+06	5.14699e+06	669068	1.42819e+06	2.72884e+06	2.01765e+06	3.78422e+06	4.78755e+06	3.1203e+06	882609		5.03849e+06	4.87617e+06	35.78	2.4273e+06	2.37325e+06	59.55	2.08	1.05	0.0104118	1.98	0.130233	1.82779	513.209	813.3	13.6	Up
M514T559_2	1.14725e+06	1.27528e+06	639499	1.19964e+06	1.88546e+06	1.55339e+06	1.12192e+06	1.11827e+06	1.95625e+06	1.48847e+06	4.28342e+06	2.04645e+06	2.24001e+06	1.00144e+06	1.52046e+06	1.3365e+06		1.24259e+06	1.17345e+06	29.11	1.98412e+06	1.73835e+06	51.12	0.63	-0.68	0.0498834	1.3	0.285686	1.45764	514.293	558.9	9.3	Down
M514T618_1	304665	124572	218016	181002	335091	268555	179167	327000	341258	411767	373219	258807	337548	286399	307132	382639		242259	243286	32.18	337346	339403	15.27	0.72	-0.48	0.014763	1.83	0.158002	1.79499	514.264	618.3	10.3	Down
M514T618_3	3.02426e+06	6.39631e+06	9.97914e+06	6.54114e+06	8.65125e+06	6.48383e+06	7.4636e+06	6.6956e+06	1.04814e+07	7.19135e+06	7.33692e+06	1.44412e+07	8.02976e+06	1.03622e+07	6.6864e+06	8.74232e+06		6.90439e+06	6.61837e+06	29.22	9.15894e+06	8.38604e+06	27.94	0.75	-0.41	0.0498834	1.3	0.285686	1.15702	514.294	618.2	10.3	Down
M514T834	3.04052e+06	4.5253e+06	6.03752e+06	5.43624e+06	5.57783e+06	7.13621e+06	4.93438e+06	1.26565e+07	2.58772e+06	3.88047e+06	2.12035e+06	3.66687e+06	3.54705e+06	3.877e+06	5.117e+06	2.45146e+06		6.16806e+06	5.50703e+06	46.64	3.40599e+06	3.60696e+06	28.72	1.81	0.86	0.00699301	2.16	0.1064	1.89824	514.289	834	13.9	Up
M514T98_1	470908	878097	592700	718193	1.40336e+06	895271	1.20871e+06	1.13016e+06	620014	651166	653252	683519	692675	180339	770194	427339		912175	886684	34.98	584812	652209	32.6	1.56	0.64	0.0498834	1.3	0.285686	1.39654	514.062	98.2	1.6	Up
M516T745	144545	94094.3	494768	235591	162989	287743	215345	81542	754981	1.03517e+06	724692	475922	742649	853538	842549	378979		214577	189167	62.05	726060	748815	28.96	0.3	-1.76	0.000621601	3.21	0.0444681	2.37407	516.272	745	12.4	Down
M518T747	133108	650991	375308	307930	261536	434246	402328	555476	233100	221542	178060	194860	121143	133164	98124.9	477706		390116	388818	41.9	207212	186460	57.63	1.88	0.91	0.0281274	1.55	0.216677	1.6982	518.277	746.9	12.4	Up
M519T111	39101.4	18846.7	39413.5	21976.4	47217.3	26166.1	28310.5	32262.2	74510.2	61660.9	138983	63801.4	71957.3	20321.1	62780.3	56031.2		31661.8	30286.3	30.6	68755.7	63290.8	47.9	0.46	-1.12	0.00699301	2.16	0.1064	1.99234	519.214	111.4	1.9	Down
M520T771_1	576349	291048	1.08855e+06	2.41111e+06	3.28613e+06	197288	610289	774783	3.28921e+06	2.6093e+06	3.98021e+06	2.73505e+06	2.64509e+06	281501	3.89591e+06	1.08479e+06		1.15444e+06	692536	95.81	2.56513e+06	2.69007e+06	50.49	0.45	-1.15	0.0498834	1.3	0.285686	1.44519	520.263	770.8	12.8	Down
M521T76	2.1451e+06	1.2614e+06	1.88094e+06	2.10511e+06	1.17549e+06	1.37317e+06	1.74758e+06	1.53862e+06	980143	525340	927887	878058	788749	2.42805e+06	1.48683e+06	1.29899e+06		1.65343e+06	1.6431e+06	22.63	1.16426e+06	954015	50.71	1.42	0.51	0.0498834	1.3	0.285686	1.54257	521.062	76.2	1.3	Up
M521T86_2	1.77543e+07	1.56928e+07	1.58696e+07	1.54135e+07	1.54502e+07	1.58362e+07	1.72527e+07	1.60577e+07	1.66714e+07	1.68048e+07	1.73607e+07	1.85948e+07	1.69883e+07	1.70826e+07	1.73694e+07	1.61102e+07		1.61659e+07	1.58529e+07	5.34	1.71228e+07	1.70354e+07	4.21	0.94	-0.08	0.0379176	1.42	0.250052	1.56154	521.03	86.4	1.4	Down
M522T73_3	265688	313876	272593	128571	2.08725e+06	1.22804e+06	464976	421257	142814	261306	176541	209581	45105.9	600576	147643	185577		647781	367567	103.74	221143	181059	74.79	2.93	1.55	0.0379176	1.42	0.250052	1.46725	522.019	73.5	1.2	Up
M523T829_1	1.02888e+06	160727	245430	677279	9.85638e+06	1.95161e+06	694436	1.10654e+06	5.12319e+06	1.40408e+07	7.8911e+06	1.50828e+06	1.03431e+07	330909	5.23364e+06	7.68823e+06		1.96516e+06	861659	164.75	6.51991e+06	6.46094e+06	68.95	0.3	-1.73	0.0379176	1.42	0.250052	1.70962	523.299	829	13.8	Down
M524T748	3.07408e+06	718246	743318	823121	4.22481e+06	3.6276e+06	1.25405e+06	2.93075e+06	540109	909330	410063	405928	392158	284018	342227	479219		2.1745e+06	2.0924e+06	66.28	470382	407996	41.18	4.62	2.21	0.0010878	2.96	0.0513787	2.12864	524.26	748.4	12.5	Up
M525T71	532209	638169	558839	431340	536372	851607	637878	757832	1.1618e+06	1.0708e+06	1.45743e+06	719430	1.13465e+06	591405	1.12754e+06	772823		618031	598358	21.82	1.00448e+06	1.09917e+06	28.46	0.62	-0.7	0.00699301	2.16	0.1064	2.02748	524.981	71.3	1.2	Down
M526T556	186290	163072	165630	147559	181778	140026	164310	143126	91448	103216	94431.1	136374	128393	178024	136948	162101		161474	163691	10.59	128867	132384	24.34	1.25	0.33	0.014763	1.83	0.158002	1.64063	526.218	556.1	9.3	Up
M527T511	21570.6	44160.2	43672.2	24673.2	65015.9	49662.2	39139	67008.9	80394.4	56621.2	119302	77001.4	73608.3	45053.4	53014.2	88173.2		44362.8	43916.2	37.16	74146.1	75304.8	31.77	0.6	-0.74	0.00699301	2.16	0.1064	1.76338	526.613	510.9	8.5	Down
M527T826	477097	4.60289e+06	1.21725e+06	4.70777e+06	7.5207e+06	4.83131e+06	1.99947e+06	6.54206e+06	8.10402e+06	1.73863e+07	7.1191e+06	672092	7.56466e+06	3.25598e+06	1.20133e+07	7.89663e+06		3.98732e+06	4.65533e+06	63.28	8.00151e+06	7.73065e+06	63.62	0.5	-1	0.0498834	1.3	0.285686	1.05611	527.321	825.7	13.8	Down
M528T718	13931	11438.1	50329.5	2948.21	65004	9298.35	13028.1	51856.3	151864	146655	151007	89132	100197	14617.2	82095.7	128760		27229.2	13479.5	88.95	108041	114478	43.56	0.25	-1.99	0.0010878	2.96	0.0513787	2.05497	528.29	717.5	12	Down
M528T87	1.3219e+06	1.45525e+06	1.51314e+06	1.43865e+06	1.40297e+06	1.47421e+06	1.5433e+06	1.48634e+06	1.34138e+06	1.36697e+06	1.35521e+06	1.37875e+06	1.16916e+06	1.4903e+06	1.35485e+06	1.39075e+06		1.45447e+06	1.46473e+06	4.74	1.35592e+06	1.36109e+06	6.54	1.07	0.1	0.0379176	1.42	0.250052	1.62091	527.968	86.6	1.4	Up
M528T99_1	4.05964e+06	3.21255e+06	2.87386e+06	5.86561e+06	4.66026e+06	3.02172e+06	3.7888e+06	3.78301e+06	1.99488e+06	1.60156e+06	3.08164e+06	2.79878e+06	2.09314e+06	3.88389e+06	3.25027e+06	1.44829e+06		3.90818e+06	3.7859e+06	25.2	2.51906e+06	2.44596e+06	34.34	1.55	0.63	0.0206682	1.68	0.184282	1.88274	528.078	98.8	1.6	Up
M529T99	541028	693929	432852	700738	499442	670066	873640	798892	353391	270294	352477	227860	280451	372040	436968	475702		651324	681998	23.12	346148	352934	24.38	1.88	0.91	0.000621601	3.21	0.0444681	2.30288	529.077	98.7	1.6	Up
M530T86_1	2.006e+06	2.00582e+06	1.60678e+06	1.18459e+06	1.18959e+06	2.32142e+06	1.78859e+06	2.09426e+06	2.42621e+06	5.69004e+06	3.65099e+06	1.57926e+06	2.72725e+06	1.36592e+06	4.03764e+06	2.33344e+06		1.77463e+06	1.8972e+06	23.59	2.97634e+06	2.57673e+06	47.97	0.6	-0.75	0.0379176	1.42	0.250052	1.64334	530.01	85.6	1.4	Down
M530T86_2	1.89292e+06	2.4802e+06	2.43679e+06	2.40346e+06	1.85875e+06	2.76113e+06	2.38045e+06	916471	778446	1.01548e+06	862748	1.19993e+06	833728	1.59946e+06	1.25497e+06	1.97746e+06		2.14127e+06	2.39196e+06	27.08	1.19028e+06	1.1077e+06	35.16	1.8	0.85	0.00699301	2.16	0.1064	1.95264	530.022	85.6	1.4	Up
M532T79_2	4.59584e+06	4.09442e+06	3.9848e+06	4.5738e+06	3.88792e+06	3.84762e+06	3.97601e+06	3.74587e+06	3.29266e+06	999440	3.15513e+06	3.75618e+06	3.54488e+06	3.60064e+06	3.89052e+06	1.12862e+06		4.08829e+06	3.98041e+06	7.91	2.92101e+06	3.41877e+06	40.06	1.4	0.49	0.0018648	2.73	0.0601903	1.5443	531.926	79.4	1.3	Up
M532T830	6.87236e+06	8.973e+06	9.26555e+06	7.74378e+06	1.00876e+07	4.48003e+06	1.2654e+07	1.30432e+07	4.2035e+06	8.41977e+06	5.15408e+06	2.87722e+06	2.31413e+06	7.05761e+06	6.118e+06	7.27428e+06		9.13994e+06	9.11928e+06	31.31	5.42732e+06	5.63604e+06	40.17	1.68	0.75	0.014763	1.83	0.158002	1.59025	532.31	829.5	13.8	Up
M533T789	3.62069e+06	2.05184e+06	2.26896e+06	2.18054e+06	1.37076e+06	1.72594e+06	1.70504e+06	1.56176e+06	1.79264e+06	2.19655e+06	3.77206e+06	2.65163e+06	3.6448e+06	2.69831e+06	3.56341e+06	3.54949e+06		2.06069e+06	1.88889e+06	34.09	2.98361e+06	3.1239e+06	25.16	0.69	-0.53	0.0206682	1.68	0.184282	1.72439	533.273	789.1	13.2	Down
M533T796	2.84955e+06	4.34709e+06	3.17808e+06	3.02409e+06	2.16133e+06	4.12662e+06	902359	888347	1.24922e+07	4.68235e+06	1.23679e+07	8.64279e+06	9.22743e+06	2.44995e+06	1.89071e+06	4.23401e+06		2.68468e+06	2.93682e+06	48.58	6.99841e+06	6.66257e+06	60.74	0.38	-1.38	0.0379176	1.42	0.250052	1.62586	533.298	795.8	13.3	Down
M534T789	1.11453e+06	677788	1.12664e+06	625121	685380	479737	472621	469858	992318	1.49633e+06	1.17926e+06	845925	777245	854511	1.11534e+06	1.16926e+06		706459	651454	38.32	1.05377e+06	1.05383e+06	22.45	0.67	-0.58	0.014763	1.83	0.158002	1.921	534.279	789	13.2	Down
M534T86_1	4.46592e+06	3.44177e+06	2.37636e+06	2.47359e+06	2.18401e+06	1.77319e+06	2.58317e+06	3.969e+06	2.58742e+06	1.84617e+06	2.24195e+06	1.96812e+06	1.55727e+06	2.05264e+06	1.9219e+06	1.89776e+06		2.90838e+06	2.52838e+06	32.43	2.00915e+06	1.94501e+06	15.08	1.45	0.53	0.0379176	1.42	0.250052	1.62094	533.905	85.6	1.4	Up
M535T165_2	7.32251e+07	5.65345e+07	8.36498e+07	9.85243e+07	7.82446e+07	8.25652e+07	6.36853e+07	4.85982e+07	1.07891e+08	6.58794e+07	1.04466e+08	1.11483e+08	1.03639e+08	7.66181e+07	1.0761e+08	1.02428e+08		7.31284e+07	7.57348e+07	22.15	97501864	1.04053e+08	17.13	0.75	-0.41	0.014763	1.83	0.158002	1.6749	535.147	164.8	2.7	Down
M535T251_3	2.20461e+06	1.11796e+06	1.30115e+06	1.30028e+06	1.76928e+06	1.21336e+06	1.33866e+06	1.10267e+06	2.04816e+06	2.05946e+06	1.95097e+06	2.04613e+06	2.36964e+06	2.43498e+06	2.48324e+06	2.18289e+06		1.4185e+06	1.30071e+06	26.74	2.19693e+06	2.12118e+06	9.31	0.65	-0.63	0.0029526	2.53	0.0725285	2.36443	535.176	250.8	4.2	Down
M535T66	194840	188172	292269	211006	132115	250841	149087	161619	316133	141528	331537	525719	227720	346139	227959	359607		197494	191506	27.07	309543	323835	37.17	0.64	-0.65	0.0281274	1.55	0.216677	1.45056	535.069	65.9	1.1	Down
M535T808	556683	317440	1.24538e+06	506347	814490	255093	615006	338955	1.11748e+06	1.26371e+06	858649	583883	951218	457444	1.28947e+06	1.40142e+06		581174	531515	55.85	990409	1.03435e+06	34.5	0.59	-0.77	0.0281274	1.55	0.216677	1.76284	535.263	807.7	13.5	Down
M536T251_1	1.90254e+07	1.29902e+07	1.31466e+07	1.29856e+07	1.67298e+07	1.32681e+07	1.42139e+07	1.40798e+07	1.5447e+07	1.89325e+07	1.89316e+07	1.87722e+07	1.94642e+07	2.09114e+07	2.3689e+07	1.89888e+07		1.45549e+07	1.3674e+07	15.05	1.93921e+07	1.89607e+07	11.91	0.75	-0.41	0.004662	2.33	0.0886941	2.25482	536.153	250.8	4.2	Down
M536T529_2	7413.2	20500.6	23378.3	6707.1	8246.26	21132.1	7187.57	39200.8	42563.9	49203.7	56660.1	34722.7	33372.2	22206.3	40681.5	32715.3		16720.7	14373.4	69.05	39015.7	37702.1	27.45	0.43	-1.22	0.0029526	2.53	0.0725285	2.04434	536.234	528.7	8.8	Down
M536T77	810138	714824	696523	697186	685742	691687	778472	669581	742818	722714	871812	870499	730004	847114	826935	714779		718019	696855	6.89	790834	784876	8.79	0.91	-0.14	0.014763	1.83	0.158002	1.53576	536.066	77.1	1.3	Down
M536T787_2	3.39515e+06	838572	2.61014e+06	2.65077e+06	2.97374e+06	1.99206e+06	1.11478e+06	1.8816e+06	3.35731e+06	3.07135e+06	5.2142e+06	7.77396e+06	4.93192e+06	2.35896e+06	2.79404e+06	3.84111e+06		2.1821e+06	2.3011e+06	40.89	4.16786e+06	3.59921e+06	42.35	0.52	-0.93	0.0104118	1.98	0.130233	1.80016	536.308	786.9	13.1	Down
M536T88	1.1899e+06	937715	960787	825452	471304	1.54276e+06	592424	1.0006e+06	1.94776e+06	318210	3.31549e+06	3.40645e+06	2.63836e+06	1.22044e+06	1.05594e+06	1.20947e+06		940118	949251	35.59	1.88901e+06	1.5841e+06	59.93	0.5	-1.01	0.0379176	1.42	0.250052	1.11051	536.099	87.5	1.5	Down
M537T709	124849	154687	227984	104416	22953.7	154225	177932	68793.6	205064	188440	207936	86739.7	305557	212304	155399	253583		129480	139537	49.69	201878	206500	31.98	0.64	-0.64	0.0379176	1.42	0.250052	1.33478	537.227	708.8	11.8	Down
M537T787	1.94862e+06	252864	1.4539e+06	1.00378e+06	1.08006e+06	1.14223e+06	336243	957906	2.10901e+06	1.68574e+06	2.88206e+06	2.87273e+06	2.1965e+06	746662	2.04226e+06	1.84807e+06		1.02195e+06	1.04192e+06	53.97	2.04788e+06	2.07563e+06	33.36	0.5	-1	0.0104118	1.98	0.130233	1.76135	537.298	786.9	13.1	Down
M538T251	355334	590334	383946	487638	416977	626268	618710	441452	365313	455700	284071	199021	379478	355802	322490	393921		490082	464545	22.12	344475	360558	22.46	1.42	0.51	0.014763	1.83	0.158002	1.76204	538.158	250.8	4.2	Up
M538T752_1	842516	938869	1.63373e+06	3.23853e+06	2.38824e+06	4.04767e+06	5.17874e+06	4.48506e+06	802703	1.51321e+06	1.02573e+06	167162	306659	1.02898e+06	982209	212822		2.84417e+06	2.81339e+06	58.01	754934	892456	63.68	3.77	1.91	0.0104118	1.98	0.130233	1.95612	538.255	752.1	12.5	Up
M538T806_2	1.38892e+08	1.86839e+08	6.90321e+07	9.41788e+07	1.81343e+08	1.85923e+08	1.26476e+08	8.36846e+07	5.29772e+07	6.98108e+07	5.78505e+07	4.14113e+07	7.22913e+07	5.93588e+07	8.25865e+07	6.39927e+07		1.33296e+08	1.32684e+08	36.03	6.25349e+07	6.16757e+07	20.24	2.13	1.09	0.0010878	2.96	0.0513787	2.13797	538.319	805.6	13.4	Up
M538T806_3	2.27439e+06	3.10494e+06	1.62635e+06	2.39021e+06	2.9486e+06	2.94802e+06	3.14325e+06	1.47824e+06	1.54638e+06	1.6096e+06	1.51181e+06	1.06719e+06	1.81208e+06	1.4942e+06	1.39558e+06	1.062e+06		2.48925e+06	2.66912e+06	26.52	1.43735e+06	1.503e+06	18.04	1.73	0.79	0.004662	2.33	0.0886941	2.1162	538.336	805.6	13.4	Up
M538T837	4.97306e+06	1.02195e+07	1.41636e+07	1.46467e+07	1.6687e+06	1.11547e+07	1.94631e+07	1.71594e+07	2.42651e+07	1.09779e+07	1.96623e+07	1.69944e+07	2.60101e+07	2.1553e+07	2.0403e+07	2.29351e+07		1.16811e+07	1.26592e+07	51.49	2.03501e+07	2.0978e+07	23.13	0.57	-0.8	0.00699301	2.16	0.1064	1.43898	538.304	836.8	13.9	Down
M538T86	2.76787e+06	7.01682e+06	3.82353e+06	3.63806e+06	5.14015e+06	4.88472e+06	5.94684e+06	5.61683e+06	2.34692e+06	2.98931e+06	3.43639e+06	1.96861e+06	519900	427798	627674	514671		4.85435e+06	5.01244e+06	28.53	1.60391e+06	1.29814e+06	76.94	3.03	1.6	0.000621601	3.21	0.0444681	2.10523	538.008	86.4	1.4	Up
M539T117	245264	128379	242680	187978	370816	138656	212581	185397	607621	323797	767027	375736	389497	160004	463732	400009		213969	200280	35.72	435928	394753	42.09	0.49	-1.03	0.00699301	2.16	0.1064	2.01044	539.128	117.1	2	Down
M539T402	25545.1	51062.1	22934.4	24735.1	38017.5	35512.7	37067.3	39517.2	47927.8	61203.9	45828.1	42538.4	51902.2	26294.6	36803.4	44604.6		34298.9	36290	27.63	44637.9	45216.3	23.06	0.77	-0.38	0.0498834	1.3	0.285686	1.3864	539.013	401.6	6.7	Down
M540T118_1	1.20582e+06	1.27009e+06	789243	1.19561e+06	1.01163e+06	1.17573e+06	1.6273e+06	1.17807e+06	577368	1.12643e+06	702371	675950	601749	886183	923722	779320		1.18169e+06	1.18684e+06	19.98	784137	740845	23.69	1.51	0.59	0.0018648	2.73	0.0601903	2.01391	540.111	117.8	2	Up
M541T120_1	485857	956123	961119	1.34158e+06	937503	988762	861546	1.28995e+06	192082	921974	163147	120669	130411	549411	522010	484969		977806	958621	27	385584	338526	73.7	2.54	1.34	0.0018648	2.73	0.0601903	2.01841	541.069	119.7	2	Up
M541T303	26520.7	41797.1	57768.3	37028.9	34135.6	34574.6	56629.8	52782.7	60903.9	63350.2	52502.1	40007.3	62650.8	81380.8	94842.5	90834.9		42654.7	39413	27.41	68309.1	63000.5	27.91	0.62	-0.68	0.00699301	2.16	0.1064	1.8969	541.266	303.4	5.1	Down
M542T89_2	1.46935e+06	1.65424e+06	1.95959e+06	656193	881545	900222	960390	882878	665616	371602	642369	856057	707623	805136	1.04372e+06	332265		1.17055e+06	930306	39.47	678048	686619	35.14	1.73	0.79	0.014763	1.83	0.158002	1.70555	542.178	89	1.5	Up
M543T121	65816.5	76565.6	68520.9	68992.1	50535.1	118919	51441.3	64527.1	347385	34280.9	333408	269522	346117	107396	91770.5	155241		70664.7	67168.7	30.29	210640	212381	60.73	0.34	-1.58	0.0206682	1.68	0.184282	1.64962	543.069	120.7	2	Down
M543T808_2	165746	91814.7	141855	38179.3	213952	37688.3	47971	108860	273955	356889	263444	353294	71683.9	131395	145612	252130		105758	100337	61.23	231050	257787	45.32	0.46	-1.13	0.0206682	1.68	0.184282	1.77126	543.278	808	13.5	Down
M543T85_1	723809	980892	869164	808508	591103	1.34385e+06	1.19066e+06	1.11798e+06	1.55542e+06	1.05512e+06	1.42384e+06	1.6632e+06	1.36143e+06	1.51614e+06	955839	1.53385e+06		953246	925028	26.56	1.3831e+06	1.46999e+06	18.14	0.69	-0.54	0.00699301	2.16	0.1064	1.72956	542.951	85	1.4	Down
M544T365_2	171008	167198	175758	111770	138112	181551	137981	141457	246746	282274	225104	360118	358561	155854	200796	204350		153104	154327	15.88	254225	235925	29.29	0.6	-0.73	0.0018648	2.73	0.0601903	2.0845	544.206	364.9	6.1	Down
M545T342	180171	66381.4	137861	74425.2	313843	86479.3	73948.8	307283	69280.7	69858.8	17208.3	122882	38583.5	177455	50658	72450.7		155049	112170	66.74	77297.2	69569.8	65.73	2.01	1	0.0379176	1.42	0.250052	1.43162	545.187	342.1	5.7	Up
M545T365	22303.5	67584.6	80158.6	32740.5	68674.6	37206.3	61334.1	44653.3	158801	149295	152659	127818	200761	104237	105114	153011		51831.9	52993.7	39.45	143962	150977	21.93	0.36	-1.47	0.0001554	3.81	0.0365579	2.43581	545.206	364.7	6.1	Down
M545T738	118419	110967	158085	92105.5	131388	138502	178427	183159	218515	179567	177105	169178	207149	187000	187303	164456		138882	134945	23.31	186284	183283	9.89	0.75	-0.42	0.00699301	2.16	0.1064	1.94398	545.321	737.8	12.3	Down
M547T393	13474.9	18458.6	19295.1	12934.5	22055	14991.2	21279.1	22868.3	44238.2	62315.8	69251.6	33638.4	44277.3	15999	30019.4	23931.3		18169.6	18876.9	21.59	40458.9	38938.3	45.41	0.45	-1.15	0.0029526	2.53	0.0725285	2.09789	546.99	392.8	6.5	Down
M547T443_1	95779.6	80170.3	101377	59046.6	106939	83431	111669	137000	59516.8	73453.8	51844.2	21488.9	27944.3	106142	76879	77686.3		96926.5	98578.4	24.17	61869.4	66485.3	45.13	1.57	0.65	0.014763	1.83	0.158002	1.47875	547.083	442.7	7.4	Up
M547T785_1	3.92835e+06	959554	1.34315e+06	1.52429e+06	1.44371e+06	694883	2.37461e+06	1.25081e+06	1.23356e+06	1.25554e+06	1.06867e+06	632757	817460	793615	1.1944e+06	1.0509e+06		1.68992e+06	1.39343e+06	60.86	1.00586e+06	1.05979e+06	23.02	1.68	0.75	0.0498834	1.3	0.285686	1.15083	547.282	785.1	13.1	Up
M548T303_1	293735	176259	233139	195937	199646	166749	116535	124032	364338	324836	504402	392326	281909	163261	263540	322378		188254	186098	30.58	327124	323607	30.58	0.58	-0.8	0.0104118	1.98	0.130233	2.01007	548.144	303.2	5.1	Down
M548T739	48193.1	104456	148343	130099	89859.6	126518	129735	75736.5	184157	271024	157700	152100	164376	121298	123361	130728		106617	115487	31.46	163093	154900	29.87	0.65	-0.61	0.014763	1.83	0.158002	1.6492	548.26	738.5	12.3	Down
M548T99	346653	378687	381416	203988	478479	331734	277576	302858	292029	175502	241308	268648	263473	222322	252289	125824		337674	339193	24.07	230174	246798	23.78	1.47	0.55	0.00699301	2.16	0.1064	1.73265	548.067	99.3	1.7	Up
M549T368	191962	115959	175252	221263	173045	118885	127221	129905	77443.9	70554.3	93410.3	116827	102698	139815	154553	44953.2		156687	151475	24.95	100032	98054.2	36.44	1.57	0.65	0.014763	1.83	0.158002	1.791	549.321	367.6	6.1	Up
M550T303_2	318336	411479	351614	273158	135806	257899	252746	289768	310680	60166.5	157352	265294	237365	159897	177652	152267		286351	281463	28.23	190084	168775	41.18	1.51	0.59	0.0498834	1.3	0.285686	1.52396	550.152	303.2	5.1	Up
M550T66	65290.6	66174.9	70141.4	60867.6	69473.5	76818.5	63735.1	62425.5	79682.7	69302	99165.3	88888.9	81012	71969.3	76424.3	69509.8		66865.9	65732.8	7.69	79494.3	78053.5	13	0.84	-0.25	0.00699301	2.16	0.1064	1.85005	550.137	66.1	1.1	Down
M550T808_2	4.69078e+06	5.97964e+06	1.28064e+07	1.26436e+07	9.13653e+06	1.15934e+07	3.85746e+06	5.8663e+06	3.16472e+06	4.11475e+06	2.85105e+06	1.74528e+06	3.55249e+06	4.39401e+06	4.14266e+06	2.93403e+06		8.32176e+06	7.55808e+06	44.22	3.36237e+06	3.3586e+06	26.06	2.47	1.31	0.0010878	2.96	0.0513787	2.13539	550.319	808.5	13.5	Up
M551T148_2	59343.6	74125.3	63391.4	48196.6	36073.7	59366.6	47057.4	54328.4	37598.7	56499.7	17103.8	35342.4	35836.2	45052.1	46163.6	48023.8		55235.4	56836	21	40202.5	41325.4	29.26	1.37	0.46	0.014763	1.83	0.158002	1.49989	551.108	148	2.5	Up
M551T758	111504	122569	138026	64216.5	86226.7	119221	65386.9	90395.9	373919	134615	259901	358962	281948	57038.8	93570.4	233415		99693.2	100950	27.38	224171	246658	52.86	0.44	-1.17	0.0498834	1.3	0.285686	1.62659	551.278	757.9	12.6	Down
M551T803	273618	179714	567703	82127.7	1.64176e+06	339837	363795	380237	3.56979e+06	2.52514e+06	3.33011e+06	1.04596e+06	1.68856e+06	128903	1.16569e+06	1.45819e+06		478598	351816	102.71	1.86404e+06	1.57338e+06	63.67	0.26	-1.96	0.0206682	1.68	0.184282	1.86246	551.258	802.6	13.4	Down
M551T840	1.17425e+06	1.28961e+06	901780	1.46008e+06	1.42574e+06	1.38655e+06	862639	1.14891e+06	1.01535e+06	828272	446843	1.06096e+06	627204	673535	370196	455709		1.20619e+06	1.23193e+06	18.99	684758	650370	38.36	1.76	0.82	0.0018648	2.73	0.0601903	2.15792	551.273	839.9	14	Up
M551T85_1	6.34191e+06	2.94727e+06	3.84761e+06	2.59259e+06	3.6923e+06	1.2442e+06	3.3608e+06	1.2909e+06	3.94886e+06	1.02482e+07	1.06066e+07	5.72507e+06	1.66923e+06	3.90357e+06	1.13446e+07	4.08168e+06		3.1647e+06	3.15403e+06	51.3	6.44098e+06	4.90337e+06	57.91	0.49	-1.03	0.0206682	1.68	0.184282	1.56595	550.935	85.1	1.4	Down
M552T791_1	405360	2.52868e+06	1.79835e+06	2.78552e+06	1.49177e+06	3.63115e+06	1.33565e+06	3.15824e+06	888626	1.54349e+06	212488	34154.9	465907	853955	1.60628e+06	1.02908e+06		2.14184e+06	2.16352e+06	49.98	829248	871290	69.16	2.58	1.37	0.0206682	1.68	0.184282	1.47326	552.251	791.1	13.2	Up
M552T791_3	1.74611e+07	3.81763e+07	4.32413e+07	4.15707e+07	3.34808e+07	8.09763e+07	5.19026e+07	4.54523e+07	2.31019e+07	2.68939e+07	4.80107e+06	816137	1.73666e+07	1.36351e+07	3.77687e+07	2.59654e+07		4.40327e+07	4.2406e+07	41.05	1.87936e+07	2.02343e+07	64.96	2.34	1.23	0.0029526	2.53	0.0725285	1.50329	552.281	791.1	13.2	Up
M552T94_1	485700	683947	583685	707168	1.01789e+06	588746	747788	949753	319200	625307	374017	87634.7	351881	563266	500052	139722		720584	695558	25.4	370135	362949	51.58	1.95	0.96	0.0029526	2.53	0.0725285	1.75188	552.324	94.1	1.6	Up
M553T393_2	104657	42549.7	79225.1	70635.4	55429	87270.5	63931.5	85125.1	56858.1	57156.5	53981.8	61000	56724	40240.3	49541.4	46526.8		73602.9	74930.3	26.74	52753.6	55352.9	12.96	1.4	0.48	0.0281274	1.55	0.216677	1.63155	553.082	392.9	6.5	Up
M553T85	1.40268e+06	1.36229e+06	1.84171e+06	1.40221e+06	1.34976e+06	1.71669e+06	1.76236e+06	1.80058e+06	759785	1.41893e+06	962540	799390	821500	1.2956e+06	1.22879e+06	1.42931e+06		1.57978e+06	1.55968e+06	13.8	1.08948e+06	1.09566e+06	26.12	1.45	0.54	0.0104118	1.98	0.130233	1.93951	552.932	85.1	1.4	Up
[truncated: 610 more rows]
