# Supplementary material for: The impact of dapagliflozin for the myocardial metabolomic profiles of mice with chronic heart failure induced by a high fat diet
Source: Research Square preprint supplement (doi:10.21203/rs.3.rs-6881055/v1), 2025-06-25
Supplement: Supplementary file 4 [file 1dc5fd0afcaa96805eb9dd41.xlsx]

## Sheet: DEM_AnalysiList
Accession	HDF_Mean	HDF_Median	HDF_RSD	Chow_Mean	Chow_Median	Chow_RSD	FC	log2FC	P.value	-log10(P.value)	FDR	VIP	Mass-to-charge ratio	Retention indices	Retention times(min)
M100T108	91781.4	73937.8	80.73	154249	125624	60.96	0.6	-0.75	0.130381	0.88	0.317655	0.928291	100.012	107.6	1.8
M101T108	6.3322e+06	7.17444e+06	39.53	8.05754e+06	7.72559e+06	56.79	0.79	-0.35	0.382284	0.42	0.606076	0.38357	101.024	107.6	1.8
M101T37	180465	176878	18.56	150157	154153	12.94	1.2	0.27	0.0649573	1.19	0.207149	1.24396	100.954	36.9	0.6
M101T387	118059	111228	24.23	125459	128479	36.04	0.94	-0.09	0.505361	0.3	0.709443	0.0514734	101.061	386.6	6.4
M101T57	333258	335432	17.15	296776	292297	7.02	1.12	0.17	0.0829837	1.08	0.241068	0.936955	100.954	56.8	0.9
M101T98	1.11645e+07	9.47275e+06	38.36	1.10923e+07	9.91736e+06	33.93	1.01	0.01	1	0	1	0.00420357	101.024	97.5	1.6
M102T31	510671	573238	51.97	460917	491022	30.32	1.11	0.15	0.573737	0.24	0.759252	0.0396164	101.934	31.1	0.5
M102T38	173925	157904	39.75	114698	111984	16.11	1.52	0.6	0.0649573	1.19	0.207149	1.24195	101.952	37.8	0.6
M102T51	339007	342447	18.79	289930	287971	6.83	1.17	0.23	0.234499	0.63	0.4544	1.06204	101.952	51.1	0.9
M102T80	3.10148e+07	2.9752e+07	8.07	3.21904e+07	3.16218e+07	9.15	0.96	-0.05	0.441803	0.35	0.659657	0.487701	102.056	80.5	1.3
M102T90	2.78512e+06	2.43337e+06	62.07	2.15671e+06	2.04096e+06	23.8	1.29	0.37	0.720901	0.14	0.850988	0.300364	102.02	90.3	1.5
M102T91	1.146e+06	1.12234e+06	26.67	1.41246e+06	1.41327e+06	20.51	0.81	-0.3	0.130381	0.88	0.317655	0.986177	102.056	91.5	1.5
M103T122	9.43102e+06	9.06681e+06	12.67	8.29552e+06	8.32099e+06	11.45	1.14	0.19	0.130381	0.88	0.317655	1.12379	103.04	121.7	2
M103T286	1.6845e+06	1.19742e+06	103.85	394848	237939	141.1	4.27	2.09	0.328205	0.48	0.552488	0.676481	103.004	285.8	4.8
M103T303	1.01505e+06	977731	28.92	483047	473780	48.17	2.1	1.07	0.000621601	3.21	0.0104451	1.59176	103.004	303.1	5.1
M103T52	1.23965e+07	1.23557e+07	9.49	7.53358e+06	7.78613e+06	38.82	1.65	0.72	0.0003108	3.51	0.00655521	1.36784	102.949	52.4	0.9
M103T54	3.63938e+06	3.86619e+06	16.93	2.40076e+06	2.42013e+06	48.73	1.52	0.6	0.0281274	1.55	0.119973	1.32444	102.933	53.7	0.9
M103T69	580287	655418	40.1	626803	632939	6.58	0.93	-0.11	0.573737	0.24	0.759252	0.541192	102.934	69	1.1
M103T80	1.32135e+06	1.28385e+06	32.6	1.47429e+06	1.03434e+06	92.37	0.9	-0.16	0.645377	0.19	0.808158	0.452959	103.059	80.4	1.3
M103T83	7.63431e+07	7.37624e+07	17.7	6.07754e+07	5.82252e+07	13.99	1.26	0.33	0.014763	1.83	0.078691	1.50224	102.957	83.3	1.4
M103T92	9.03188e+07	6.39219e+07	104.35	1.49409e+08	1.27527e+08	66.02	0.6	-0.73	0.194872	0.71	0.408126	0.898738	103.04	92.2	1.5
M103T93	2.12259e+06	2.1571e+06	13.49	2.14623e+06	2.34863e+06	31.1	0.99	-0.02	0.234499	0.63	0.4544	0.345852	103.004	92.7	1.5
M104T83	704158	697705	7.11	641393	635951	12.15	1.1	0.13	0.130381	0.88	0.317655	1.03038	103.96	83.3	1.4
M104T85	3.09746e+07	3.24772e+07	53.77	1.31176e+07	1.09514e+07	48.85	2.36	1.24	0.0206682	1.68	0.0984557	1.34135	104.035	84.6	1.4
M105T74	2.03269e+06	1.43763e+06	67.32	1.79511e+06	1.89753e+06	21.26	1.13	0.18	0.720901	0.14	0.850988	0.135278	105.019	74.2	1.2
M105T82	4.22091e+07	4.10451e+07	52.22	5.23895e+07	4.24122e+07	73.43	0.81	-0.31	0.720901	0.14	0.850988	0.0186626	105.019	81.7	1.4
M105T83	1.91099e+07	1.70674e+07	30.01	1.67503e+07	1.60679e+07	12.56	1.14	0.19	0.278632	0.55	0.503994	0.545919	104.954	83.3	1.4
M105T92	454101	504825	67.74	609225	628461	38.48	0.75	-0.42	0.328205	0.48	0.552488	0.882973	105.044	92.2	1.5
M106T434	516642	425028	95.78	654112	653665	43.35	0.79	-0.34	0.278632	0.55	0.503994	0.811743	106.04	433.9	7.2
M106T455	587890	557868	36.34	930830	769169	86.6	0.63	-0.66	0.645377	0.19	0.808158	0.20472	106.04	454.7	7.6
M106T482	2.09576e+06	1.84297e+06	56.21	2.83424e+06	3.02581e+06	51.03	0.74	-0.44	0.278632	0.55	0.503994	0.573937	106.04	482	8
M106T82	1.23184e+06	1.15269e+06	28.7	1.27568e+06	1.21782e+06	16.09	0.97	-0.05	0.645377	0.19	0.808158	0.257804	106.023	81.8	1.4
M107T472	178037	170845	27.78	172390	163529	22.17	1.03	0.05	0.95913	0.02	0.981433	0.143127	107.05	471.6	7.9
M107T88	1.85427e+06	1.88663e+06	21.56	1.61935e+06	1.69391e+06	16.95	1.15	0.2	0.160528	0.79	0.36158	0.779703	106.981	88.3	1.5
M108T122	8.92808e+06	6.97151e+06	66.91	1.8407e+07	2.21453e+07	57.52	0.49	-1.04	0.130381	0.88	0.317655	0.910809	108.02	121.7	2
M108T251	214956	214126	21.16	233139	241612	21.73	0.92	-0.12	0.505361	0.3	0.709443	0.366326	108.02	250.5	4.2
M108T336	111535	90109.6	100.8	277111	319623	37.51	0.4	-1.31	0.0498834	1.3	0.173853	1.26157	108.046	335.7	5.6
M108T456	323652	278405	56.8	157604	132959	56.03	2.05	1.04	0.0498834	1.3	0.173853	1.27443	108.046	456.3	7.6
M108T87	4.93851e+06	3.50419e+06	72.66	9.92184e+06	9576791	42.01	0.5	-1.01	0.014763	1.83	0.078691	1.41605	108.013	86.7	1.4
M108T94	618990	590434	88.12	148888	156751	46.78	4.16	2.06	0.194872	0.71	0.408126	0.921065	108.057	93.5	1.6
M109T122	1.78558e+06	1.66844e+06	25.61	1.65692e+06	1.59661e+06	21.85	1.08	0.11	0.441803	0.35	0.659657	0.482242	109.041	121.7	2
M109T147	348865	363711	47.41	499244	597396	41.61	0.7	-0.52	0.0829837	1.08	0.241068	0.662105	109.041	146.7	2.4
M109T480	2.46907e+06	2.2735e+06	88.75	3.6134e+06	3.62229e+06	47.69	0.68	-0.55	0.234499	0.63	0.4544	0.92929	109.04	479.7	8
M109T83	2.46046e+07	2.37759e+07	17.38	2.55983e+07	2.27491e+07	20.82	0.96	-0.06	0.720901	0.14	0.850988	0.215614	108.902	82.6	1.4
M109T87	2.9969e+06	3.16333e+06	60.64	1.30434e+06	548081	101.26	2.3	1.2	0.0498834	1.3	0.173853	1.05847	109.041	87	1.4
M110T123	1.08085e+06	1.08279e+06	9.05	1.12702e+06	1.0879e+06	12.71	0.96	-0.06	0.798446	0.1	0.895187	0.355281	110.025	123.2	2.1
M110T94	1.51009e+06	1.51849e+06	6.57	1.54496e+06	1.51304e+06	5.11	0.98	-0.03	0.720901	0.14	0.850988	0.474423	110.072	93.6	1.6
M111T108	1.00857e+06	800629	67.68	2.06869e+06	1.97973e+06	29.83	0.49	-1.04	0.0029526	2.53	0.0288032	1.50677	111.009	107.6	1.8
M111T122	6.82199e+07	5.99957e+07	26.67	9.31135e+07	9.27924e+07	18.69	0.73	-0.45	0.0281274	1.55	0.119973	1.46888	111.02	121.9	2
M111T393	2.64447e+06	2.71444e+06	63.77	5.89369e+06	6.1427e+06	16.74	0.45	-1.16	0.000621601	3.21	0.0104451	1.60117	111.045	393.5	6.6
M111T70	3.94075e+06	3.77849e+06	39.31	4.12827e+06	4.18146e+06	17.1	0.95	-0.07	0.798446	0.1	0.895187	0.433471	111.009	70.3	1.2
M111T79	1.47207e+07	1.43792e+07	13.36	1.56623e+07	1.51556e+07	20.55	0.94	-0.09	0.573737	0.24	0.759252	0.343839	110.985	79	1.3
M111T83	1.79944e+07	1.50333e+07	55.16	2.25333e+07	1.58183e+07	60.28	0.8	-0.32	0.645377	0.19	0.808158	0.469592	110.899	82.6	1.4
M111T97_1	276395	73229.1	149.21	1.27603e+06	1.24265e+06	49.78	0.22	-2.21	0.0029526	2.53	0.0288032	1.67971	110.958	97.3	1.6
M111T97_2	6.56086e+06	4.68658e+06	89.6	823571	880140	16.47	7.97	2.99	0.0029526	2.53	0.0288032	1.69768	111.02	96.6	1.6
M112T110	586472	611857	48.58	856850	825946	29.03	0.68	-0.55	0.130381	0.88	0.317655	0.930645	112.004	110.1	1.8
M112T121_1	1.43537e+06	1.45312e+06	33.35	2.24392e+06	1.90624e+06	68.93	0.64	-0.64	0.194872	0.71	0.408126	0.726866	112.04	121.5	2
M112T121_2	3.16589e+07	31228020	28.75	2.77674e+07	2.79187e+07	7.93	1.14	0.19	0.798446	0.1	0.895187	0.597851	112.052	120.8	2
M112T122	4.85057e+06	4.56315e+06	19.8	2.09623e+06	961798	86.61	2.31	1.21	0.014763	1.83	0.078691	1.71949	112.023	121.9	2
M112T136	1.2245e+06	1.35037e+06	34.18	1.43513e+06	1.44702e+06	10.24	0.85	-0.23	0.278632	0.55	0.503994	0.705138	112.023	136.1	2.3
M112T717	4.14787e+06	3.99466e+06	20.54	3.54833e+06	3.67546e+06	50.21	1.17	0.23	0.382284	0.42	0.606076	0.760536	112.051	717.4	12
M112T759	4.51657e+06	4.9483e+06	59.48	1.61235e+06	936157	87.14	2.8	1.49	0.0206682	1.68	0.0984557	1.34912	112.052	758.5	12.6
M112T770	6.19461e+06	5.81564e+06	46.65	3.75719e+06	2.73946e+06	86.99	1.65	0.72	0.130381	0.88	0.317655	1.08647	112.051	770.3	12.8
M112T802	1.60478e+06	1.34353e+06	66.01	2.81136e+06	1.02319e+06	134.84	0.57	-0.81	0.720901	0.14	0.850988	0.446616	112.052	801.9	13.4
M112T819	1.35316e+07	1.05773e+07	80.99	4.18679e+06	2.44853e+06	82.1	3.23	1.69	0.0498834	1.3	0.173853	1.25936	112.052	819.1	13.7
M112T95	1.74356e+07	1.96131e+07	48.22	2.00757e+07	1.74081e+07	50.48	0.87	-0.2	0.878477	0.06	0.936588	0.314598	112.052	94.8	1.6
M113T117	1.02549e+08	1.07376e+08	19.11	1.04841e+08	1.03754e+08	6.77	0.98	-0.03	0.95913	0.02	0.981433	0.281265	112.986	117	2
M113T120	1.13965e+06	777546	115.29	2.937e+06	3.42222e+06	66.56	0.39	-1.37	0.104895	0.98	0.278831	0.982835	113.055	120.4	2
M113T121	1.83075e+06	1.75924e+06	18.24	1.42089e+06	1.25543e+06	43.45	1.29	0.37	0.194872	0.71	0.408126	1.14248	113.024	120.9	2
M113T374	7.07994e+07	7.53817e+07	33.6	9.62904e+06	7.65898e+06	92	7.35	2.88	0.0001554	3.81	0.00449411	2.05996	112.986	373.8	6.2
M113T696	1.25091e+08	1.32933e+08	46.8	1.15306e+08	1.33427e+08	47.53	1.08	0.12	0.878477	0.06	0.936588	0.201273	112.984	695.7	11.6
M113T719	3.35857e+08	2.99621e+08	31.61	2.83304e+08	3.00173e+08	27.12	1.19	0.25	0.505361	0.3	0.709443	0.778627	112.985	718.6	12
M113T732	2.85958e+08	2.71977e+08	65.14	1.95989e+08	2.01688e+08	34.06	1.46	0.55	0.382284	0.42	0.606076	0.463623	112.984	732.4	12.2
M113T765	2.11932e+08	1.05499e+08	96.62	9.80162e+08	7.93489e+08	86.31	0.22	-2.21	0.004662	2.33	0.0380456	1.35576	112.985	764.9	12.7
M113T780	1.57589e+08	1.57057e+08	53.07	5.12731e+08	3.92135e+08	63.68	0.31	-1.7	0.004662	2.33	0.0380456	1.54182	112.985	779.8	13
M113T810	1.28794e+09	1.19487e+09	37.09	1190622572	9.67049e+08	57.55	1.08	0.11	0.720901	0.14	0.850988	0.448405	112.986	809.6	13.5
M113T83	2.79844e+06	2.92468e+06	18.53	2.77459e+06	2.71063e+06	22.53	1.01	0.01	1	0	1	0.215169	112.896	82.6	1.4
M113T84	4.07341e+08	4.13271e+08	53.92	1.62252e+08	1.53057e+08	43.04	2.51	1.33	0.004662	2.33	0.0380456	1.62801	112.986	84.1	1.4
M113T85	1.02778e+06	870347	108.09	17326	17635.5	8.81	59.32	5.89	0.0001554	3.81	0.00449411	1.37275	113.036	85.2	1.4
M113T90	8.21686e+06	8.19574e+06	31.85	1.01308e+07	9.78307e+06	12.27	0.81	-0.3	0.130381	0.88	0.317655	1.03144	113.024	90.2	1.5
M113T98	1.34528e+07	1.27433e+07	17.12	1.21297e+07	1.34548e+07	33.21	1.11	0.15	0.95913	0.02	0.981433	0.515545	112.986	98.3	1.6
M114T117	2096067	2.28284e+06	43.94	2.3257e+06	2.12668e+06	52.7	0.9	-0.15	0.798446	0.1	0.895187	0.139101	113.989	117	2
M114T122	2.9721e+06	2.20262e+06	110.09	3.55131e+06	2.61262e+06	96.9	0.84	-0.26	0.645377	0.19	0.808158	0.349354	114.056	121.6	2
M114T709	1.1341e+06	1.25854e+06	29.05	885921	851547	43.92	1.28	0.36	0.104895	0.98	0.278831	0.810227	113.989	708.9	11.8
M114T718	3.44734e+06	3.42608e+06	17.94	2.92502e+06	3.05344e+06	19.16	1.18	0.24	0.160528	0.79	0.36158	0.993084	113.989	718.2	12
M114T742	4.90248e+06	5.33065e+06	20.11	3.26318e+06	3.65354e+06	36.81	1.5	0.59	0.0104118	1.98	0.0628046	1.27101	113.989	742.2	12.4
M114T767	5.2981e+06	4.60036e+06	57.46	5.43186e+06	4.14466e+06	58.8	0.98	-0.04	0.720901	0.14	0.850988	0.0138881	113.989	767.2	12.8
M114T80	3.78292e+06	2.55935e+06	68.33	2.38223e+06	1.76526e+06	49.38	1.59	0.67	0.234499	0.63	0.4544	0.87361	114.02	80.3	1.3
M114T84	5.2285e+06	5.70975e+06	33.95	4.64654e+06	3.53109e+06	41.61	1.13	0.17	0.720901	0.14	0.850988	0.447682	113.989	84.1	1.4
M114T91	407083	419344	34.79	267389	284862	44.58	1.52	0.61	0.0281274	1.55	0.119973	0.920367	114.02	90.9	1.5
M114T94	761994	791031	16.41	531095	536677	21.75	1.43	0.52	0.0029526	2.53	0.0288032	1.68076	114.031	94.5	1.6
M114T96	9.39449e+06	9.33244e+06	16.71	5.71774e+06	5.7167e+06	7.05	1.64	0.72	0.0001554	3.81	0.00449411	2.07792	114.056	96.3	1.6
M114T98	2.92855e+06	2.44336e+06	50.74	5.17827e+06	5.35456e+06	49.71	0.57	-0.82	0.0649573	1.19	0.207149	1.15716	114.02	98.2	1.6
M115T111_1	4.79001e+06	4.97465e+06	62.82	7.8157e+06	4.25413e+06	96.51	0.61	-0.71	0.95913	0.02	0.981433	0.638446	115.004	110.8	1.8
M115T111_2	3.45842e+06	3.26152e+06	15.52	3.33856e+06	3.45266e+06	9	1.04	0.05	1	0	1	0.340471	115.04	111.4	1.9
M115T117	337996	328578	11.78	292069	292737	18.16	1.16	0.21	0.130381	0.88	0.317655	1.07559	114.99	117.4	2
M115T126	721599	721999	3.86	752206	759986	7.33	0.96	-0.06	0.278632	0.55	0.503994	0.810288	115.004	125.8	2.1
M115T31	465946	461442	14.31	512035	460023	26.26	0.91	-0.14	0.720901	0.14	0.850988	0.580054	114.934	31.1	0.5
M115T84	1.32023e+06	1.29914e+06	26.59	1.99791e+06	1.83694e+06	25.41	0.66	-0.6	0.00699301	2.16	0.0487438	1.60428	114.99	84	1.4
M115T91	1.19221e+06	1.19114e+06	48.59	1.42707e+06	1.50841e+06	28.1	0.84	-0.26	0.878477	0.06	0.936588	0.519368	114.989	90.6	1.5
M116T108	6.52367e+07	6.57808e+07	9.7	5.74597e+07	5.49169e+07	12.68	1.14	0.18	0.0498834	1.3	0.173853	1.2235	116.072	108	1.8
M116T157	3.95648e+06	3.85955e+06	27.27	3.70555e+06	3.55697e+06	37.54	1.07	0.09	0.798446	0.1	0.895187	0.398454	116.071	156.9	2.6
M116T206	3.03353e+06	3.03083e+06	43.88	1.84384e+06	1.83594e+06	18.75	1.65	0.72	0.104895	0.98	0.278831	1.31701	116.071	205.7	3.4
M116T287	2.41739e+06	2.18593e+06	31.97	2.76675e+06	2.55965e+06	53.24	0.87	-0.19	0.720901	0.14	0.850988	0.0144917	116.071	286.7	4.8
M116T31	938061	944350	5.91	829296	848654	10.06	1.13	0.18	0.004662	2.33	0.0380456	1.46112	115.921	31.1	0.5
M116T324	1.41484e+06	1.25451e+06	26.67	1.29221e+06	1.28862e+06	23.53	1.09	0.13	0.878477	0.06	0.936588	0.476471	116.073	324.5	5.4
M116T363	503306	472627	85.46	974984	959325	48.53	0.52	-0.95	0.0649573	1.19	0.207149	0.986756	116.051	363	6
M116T532	1.24936e+06	1.1789e+06	36.58	1.50001e+06	1.43734e+06	33.84	0.83	-0.26	0.441803	0.35	0.659657	0.662248	116.073	532.3	8.9
M116T549	4.57352e+06	4.55443e+06	30.42	5.20615e+06	5.46206e+06	18.24	0.88	-0.19	0.382284	0.42	0.606076	0.613089	116.073	548.9	9.1
M116T565	4.01775e+06	4.05497e+06	16.7	2.1661e+06	1.28631e+06	60.61	1.85	0.89	0.00699301	2.16	0.0487438	1.57458	116.071	565.5	9.4
M116T590	2.507e+06	2.47973e+06	20.6	2.08323e+06	2.149e+06	32.35	1.2	0.27	0.130381	0.88	0.317655	0.882224	116.073	589.8	9.8
M116T660	3.02987e+06	3.23728e+06	21.79	3.22894e+06	3.09873e+06	21.32	0.94	-0.09	0.878477	0.06	0.936588	0.391448	116.073	660.3	11
M116T675	1.11582e+06	1.13877e+06	28.05	2.7785e+06	2.59159e+06	33.02	0.4	-1.32	0.000621601	3.21	0.0104451	1.91111	116.071	675.3	11.3
M116T696	3.3515e+06	3.1748e+06	50.13	3.99426e+06	3.91551e+06	20.25	0.84	-0.25	0.573737	0.24	0.759252	0.740227	116.071	696.5	11.6
M116T732	1.94082e+06	1.90841e+06	30.47	3.53476e+06	3.57291e+06	27.77	0.55	-0.86	0.00699301	2.16	0.0487438	1.70704	116.071	732	12.2
M116T751	4.66182e+06	5.17987e+06	51.86	3.68996e+06	3.83168e+06	42.02	1.26	0.34	0.382284	0.42	0.606076	0.471461	116.073	751	12.5
M116T766	3.81183e+06	3.55666e+06	34.49	4.23425e+06	3.99245e+06	27.72	0.9	-0.15	0.382284	0.42	0.606076	0.441518	116.072	766.4	12.8
M116T91	4.79968e+06	4.66646e+06	24.73	6.33085e+06	4.25906e+06	69.9	0.76	-0.4	1	0	1	0.285124	116.035	90.6	1.5
M116T99	3.94032e+06	3.73608e+06	31.35	2.39878e+06	2.2857e+06	53.48	1.64	0.72	0.0281274	1.55	0.119973	1.25817	116.035	99.2	1.7
M117T107	2.63045e+06	2.40116e+06	57.81	2.65771e+06	2.7087e+06	44.72	0.99	-0.01	1	0	1	0.117309	117.019	107.3	1.8
M117T122	1.2135e+07	1.36516e+07	81.15	7.33028e+06	6.82451e+06	73.67	1.66	0.73	0.328205	0.48	0.552488	0.606668	117.056	121.6	2
M117T309	493405	475835	39.03	669351	627772	30.61	0.74	-0.44	0.160528	0.79	0.36158	1.01291	116.907	309.4	5.2
M117T74_1	1.40541e+07	1.2535e+07	35.47	5.48062e+06	5.93092e+06	37.97	2.56	1.36	0.0003108	3.51	0.00655521	1.81618	116.983	74.2	1.2
M117T74_2	1.56185e+06	1.75277e+06	43.62	1.55602e+06	1.4506e+06	60.44	1	0.01	0.441803	0.35	0.659657	0.100833	117.008	74.4	1.2
M117T77	1.11894e+07	9.12365e+06	54.2	7.6781e+06	8.67062e+06	31.61	1.46	0.54	0.328205	0.48	0.552488	0.807099	117.019	76.5	1.3
M117T92	3.76366e+06	3.69626e+06	8.79	3.42795e+06	3.34653e+06	5.5	1.1	0.13	0.0379176	1.42	0.147066	1.3002	117.019	91.5	1.5
M118T118	459542	481923	41.64	372712	409908	46.76	1.23	0.3	0.505361	0.3	0.709443	0.688686	118.059	117.9	2
M118T31	849626	839921	21.37	731846	722063	13.87	1.16	0.22	0.194872	0.71	0.408126	0.94662	117.928	31.1	0.5
M118T374	153511	172984	32.58	141023	169968	49.74	1.09	0.12	1	0	1	0.40865	118.066	374.1	6.2
M118T557	382468	218279	128.14	228333	219526	54.19	1.68	0.74	0.878477	0.06	0.936588	0.174165	118.03	557.2	9.3
M118T88	6.92812e+07	6.8554e+07	30.48	3.65553e+07	3.7714e+07	18.41	1.9	0.92	0.000621601	3.21	0.0104451	1.8409	118.051	87.8	1.5
M119T148	29718.8	29229.8	14.01	28484.3	28732.9	24.13	1.04	0.06	0.798446	0.1	0.895187	0.367237	119.05	147.7	2.5
M119T220	1.0053e+07	8.97943e+06	83.96	8.76388e+06	9.69222e+06	34.31	1.15	0.2	0.720901	0.14	0.850988	0.118582	119.037	219.9	3.7
M119T309	419477	420689	46.17	516035	507349	42.39	0.81	-0.3	0.441803	0.35	0.659657	0.60764	118.904	309.3	5.2
M119T31_1	52822.8	53262.2	11.56	62484.3	60647.6	10.51	0.85	-0.24	0.014763	1.83	0.078691	1.51047	118.9	30.8	0.5
M119T31_2	95671.3	44663.9	86.86	209107	209150	15.46	0.46	-1.13	0.00699301	2.16	0.0487438	1.61445	118.927	31.1	0.5
M119T74	2.92881e+06	2.90344e+06	23.86	3.76392e+06	4.09365e+06	37.69	0.78	-0.36	0.0649573	1.19	0.207149	0.52602	118.999	74.2	1.2
M119T83	7.20117e+06	6.82559e+06	50.58	8.08063e+06	7.32871e+06	32.01	0.89	-0.17	0.573737	0.24	0.759252	0.518385	118.931	83.4	1.4
M119T88	3.01014e+06	2.73903e+06	33.27	3.08769e+06	3.10437e+06	21.97	0.97	-0.04	1	0	1	0.230734	119.054	87.8	1.5
M119T90	1.24263e+07	9.17022e+06	51	8.15615e+06	9.05151e+06	24.83	1.52	0.61	0.505361	0.3	0.709443	0.916252	119.035	90.2	1.5
M120T104	266368	271031	20.61	232659	236074	16.71	1.14	0.2	0.194872	0.71	0.408126	0.776984	120.013	104.3	1.7
M121T108	1.22551e+06	1.21494e+06	8.76	1.29216e+06	1.11615e+06	42.51	0.95	-0.08	0.160528	0.79	0.36158	0.0346648	121.03	107.5	1.8
M121T257	1.55095e+07	1.61802e+07	26.15	1.65941e+07	1.6498e+07	12	0.93	-0.1	0.720901	0.14	0.850988	0.519069	121.029	257	4.3
M121T286	121470	131117	53.18	106679	133576	67.32	1.14	0.19	0.95913	0.02	0.981433	0.51073	121.041	285.6	4.8
M121T456	542248	573428	49.01	810595	895901	47.44	0.67	-0.58	0.0829837	1.08	0.241068	0.799226	121.041	455.8	7.6
M121T494	4.00953e+07	1.69748e+07	111.2	5.63063e+07	3.54869e+07	88.26	0.71	-0.49	0.505361	0.3	0.709443	0.457667	121.029	493.6	8.2
M121T83	2.66872e+06	2.79124e+06	13.35	2.50065e+06	2.7493e+06	52.07	1.07	0.09	0.95913	0.02	0.981433	0.488841	120.928	83.4	1.4
M122T257	538237	481816	49.74	655626	598643	23.97	0.82	-0.28	0.382284	0.42	0.606076	0.781371	122.034	257.3	4.3
M122T433	494722	633415	63.64	801050	642718	92.58	0.62	-0.7	0.798446	0.1	0.895187	0.489364	122.036	433.5	7.2
M122T454	875049	798902	61.58	1.53857e+06	1.34947e+06	51.83	0.57	-0.81	0.104895	0.98	0.278831	1.05673	122.036	454.5	7.6
M122T494	1.14375e+06	1.12038e+06	26.57	1.59041e+06	1.52158e+06	24.84	0.72	-0.48	0.0281274	1.55	0.119973	1.30402	122.034	493.6	8.2
M123T113	222390	223916	34.38	157287	153288	51.77	1.41	0.5	0.194872	0.71	0.408126	1.13687	123.02	112.7	1.9
M123T374	359070	354223	31.1	320594	340774	43.88	1.12	0.16	0.505361	0.3	0.709443	0.395023	122.976	374.4	6.2
M123T81	1.60794e+07	1.48494e+07	20.01	1.3511e+07	1.37528e+07	16.73	1.19	0.25	0.278632	0.55	0.503994	1.08886	122.976	81.3	1.4
M123T91	3.2882e+06	2.77165e+06	36.17	1.97296e+06	1.88753e+06	25.93	1.67	0.74	0.0029526	2.53	0.0288032	1.60768	122.976	90.6	1.5
M124T108	5.65294e+07	3.51737e+07	103.91	3.99828e+07	4.12593e+07	57.65	1.41	0.5	0.95913	0.02	0.981433	0.291982	124.007	107.6	1.8
M124T116	1.25812e+06	1.16832e+06	23.11	752928	797315	54.83	1.67	0.74	0.0104118	1.98	0.0628046	1.17547	123.902	115.8	1.9
M124T363	1.11494e+06	1.11607e+06	21.29	1.03652e+06	1.12873e+06	30.07	1.08	0.11	0.798446	0.1	0.895187	0.371824	124.006	363.1	6.1
M124T53	5.03333e+06	4.91606e+06	19.93	4.09228e+06	4.24291e+06	14.49	1.23	0.3	0.0649573	1.19	0.207149	1.26493	123.902	52.5	0.9
M124T68	1.32546e+06	733920	76.36	1.53115e+06	631753	138.11	0.87	-0.21	0.645377	0.19	0.808158	0.101696	124.007	68.2	1.1
M124T74	8.16352e+06	7.92592e+06	44.15	6.60829e+06	6.49557e+06	20.85	1.24	0.3	0.160528	0.79	0.36158	0.200859	124.007	74.5	1.2
M124T86_1	2.20607e+09	2.05848e+09	16.45	2.06008e+09	2.01933e+09	11.56	1.07	0.1	0.573737	0.24	0.759252	0.583839	124.008	86.1	1.4
M124T86_2	1.11075e+06	1.10205e+06	5.59	1.03604e+06	1.01296e+06	8.61	1.07	0.1	0.0829837	1.08	0.241068	1.0993	124.044	86.2	1.4
M125T104	3.56124e+06	2.71739e+06	61.14	5.26679e+06	4.95053e+06	34.38	0.68	-0.56	0.194872	0.71	0.408126	1.11426	125.018	104.4	1.7
M125T114	78386	58609.8	105.76	6474.55	6732.72	25.92	12.11	3.6	0.645377	0.19	0.808158	1.00438	124.992	113.9	1.9
M125T192	625411	568252	40.12	430510	443858	46.67	1.45	0.54	0.0829837	1.08	0.241068	0.97746	125.036	191.6	3.2
M125T256	315043	331179	13.66	200675	201206	18.35	1.57	0.65	0.0001554	3.81	0.00449411	1.91444	125.097	256.4	4.3
M125T281	226141	221677	22.06	281705	292624	13.06	0.8	-0.32	0.0498834	1.3	0.173853	1.29846	125.047	281.5	4.7
M125T329	1.10522e+06	803176	64.55	1.27624e+06	911712	56.79	0.87	-0.21	0.720901	0.14	0.850988	0.356622	125.036	329.3	5.5
M125T374	225026	215693	34.36	221425	191367	44.45	1.02	0.02	1	0	1	0.0945165	125.016	374.2	6.2
M125T499	108417	100382	46.05	97645.4	105207	22.22	1.11	0.15	0.720901	0.14	0.850988	0.123638	125.097	498.9	8.3
M125T70	1.1504e+06	1.06596e+06	53.86	610725	609465	18.47	1.88	0.91	0.160528	0.79	0.36158	1.35701	125.025	70.5	1.2
M125T85	697816	711147	31.99	639682	659130	49.36	1.09	0.13	0.798446	0.1	0.895187	0.511342	124.991	84.6	1.4
M125T86	5.48816e+07	5.59519e+07	24.64	5.0322e+07	5.06921e+07	15.51	1.09	0.13	0.328205	0.48	0.552488	0.342055	125.011	86.1	1.4
M125T91	585857	595958	12.23	552079	567983	15.4	1.06	0.09	0.441803	0.35	0.659657	0.429745	125.025	91	1.5
M126T154	443075	424591	10.22	454001	465112	8.46	0.98	-0.04	0.798446	0.1	0.895187	0.329259	126.092	153.5	2.6
M126T159	4816900	4.06723e+06	62.4	3.13304e+06	3.14581e+06	56.82	1.54	0.62	0.194872	0.71	0.408126	0.826002	126.002	159	2.6
M126T166	3.48232e+06	3.29148e+06	33.27	3.13005e+06	3.27794e+06	23.01	1.11	0.15	0.878477	0.06	0.936588	0.359927	126.001	166.5	2.8
M126T53	2.16291e+06	2.22322e+06	11.48	1.83495e+06	1.99562e+06	34.52	1.18	0.24	0.328205	0.48	0.552488	0.74651	125.9	53.1	0.9
M126T86	9.59797e+07	1.12426e+08	32.65	8.77661e+07	9.20867e+07	31.98	1.09	0.13	0.573737	0.24	0.759252	0.378528	126.003	86.1	1.4
M126T89	1.18054e+06	1.12477e+06	10.76	1.24755e+06	1.22279e+06	15.34	0.95	-0.08	0.645377	0.19	0.808158	0.539222	126.02	88.7	1.5
M127T103	5.58021e+06	5.19919e+06	13.9	2.614e+06	2.00397e+06	54.42	2.13	1.09	0.0001554	3.81	0.00449411	1.80154	127.04	102.7	1.7
M127T121	4.48385e+07	4.16641e+07	43.74	3.41442e+07	3.50217e+07	26.85	1.31	0.39	0.328205	0.48	0.552488	0.664444	127.04	121.2	2
M127T147	2.27823e+07	2.18579e+07	52.22	1.50058e+07	1.44394e+07	53.2	1.52	0.6	0.234499	0.63	0.4544	0.740455	127.004	147.4	2.5
M127T277	222523	216395	22.5	187834	183283	19.67	1.18	0.24	0.234499	0.63	0.4544	0.962105	126.881	277.1	4.6
M127T303	617462	464307	82.36	749410	757036	30.43	0.82	-0.28	0.104895	0.98	0.278831	0.732876	127.076	303.3	5.1
M127T368	22397.9	16844.9	56.04	27697.9	23744.2	47.31	0.81	-0.31	0.382284	0.42	0.606076	0.496381	126.881	368.2	6.1
M127T383	83665.4	78886.2	54.67	55562.7	60154.6	37.01	1.51	0.59	0.234499	0.63	0.4544	0.744815	126.881	382.6	6.4
M127T44	279913	275314	7.84	216137	203650	13.49	1.3	0.37	0.0010878	2.96	0.0151734	1.89314	126.881	43.8	0.7
M127T493	123164	98175.4	87.94	116397	110341	53.09	1.06	0.08	0.720901	0.14	0.850988	0.244398	127.113	493.5	8.2
M127T506	262765	258375	20.69	206476	205265	20.59	1.27	0.35	0.0649573	1.19	0.207149	1.25233	127.113	506.2	8.4
M127T86	1.56088e+06	1.57195e+06	35.77	1.36826e+06	1.26838e+06	32.65	1.14	0.19	0.645377	0.19	0.808158	0.390297	127.007	86.1	1.4
M128T120	697341	723753	43.56	562131	545374	21.97	1.24	0.31	0.441803	0.35	0.659657	0.398637	128.072	119.6	2
M128T121	2.70042e+06	2.60611e+06	34.49	2.46171e+06	2.40618e+06	58.28	1.1	0.13	0.505361	0.3	0.709443	0.437416	128.043	121.1	2
M128T147	1.2795e+06	1.27113e+06	55.73	885529	967676	37.57	1.44	0.53	0.328205	0.48	0.552488	0.77851	128.007	147.2	2.5
M128T164	424317	451594	46.76	528526	538022	31.93	0.8	-0.32	0.160528	0.79	0.36158	0.56141	128.007	164.1	2.7
M128T173	560616	417644	83.44	203460	118208	125.86	2.76	1.46	0.0281274	1.55	0.119973	1.26012	128.018	173.5	2.9
M128T204	124839	129378	74.31	183359	188357	42.61	0.68	-0.55	0.234499	0.63	0.4544	0.660662	127.998	204.1	3.4
M128T32	134268	137975	13.61	147628	144840	12.36	0.91	-0.14	0.278632	0.55	0.503994	0.953257	127.957	31.5	0.5
M128T471	413999	232190	112.17	525638	530647	45.35	0.79	-0.34	0.328205	0.48	0.552488	0.751789	128.018	470.7	7.8
M128T55	523085	513524	21.59	428528	428365	19.77	1.22	0.29	0.104895	0.98	0.278831	0.985725	127.897	55	0.9
M128T80	6.12051e+07	5.12198e+07	54.51	4.86426e+07	4.42886e+07	38	1.26	0.33	0.505361	0.3	0.709443	0.39959	128.035	80.4	1.3
M128T87	1.2828e+06	1.39339e+06	19.86	998553	996878	18.65	1.28	0.36	0.0206682	1.68	0.0984557	1.25616	128.055	87.2	1.5
M128T90	4.53268e+08	4.10325e+08	46.8	5.95177e+08	6.03366e+08	11.07	0.76	-0.39	0.234499	0.63	0.4544	1.07822	128.035	90.2	1.5
M129T100	2.21535e+06	461092	152.27	5.8485e+06	6.53811e+06	70.82	0.38	-1.4	0.0649573	1.19	0.207149	1.0676	128.96	99.8	1.7
M129T101	415793	413238	30.1	575397	525778	20.99	0.72	-0.47	0.0379176	1.42	0.147066	1.33536	128.983	101.5	1.7
M129T108	7.4664e+06	7452955	16.5	8.33239e+06	8.17122e+06	12.68	0.9	-0.16	0.0829837	1.08	0.241068	0.94121	129.019	107.6	1.8
M129T111	3.85379e+06	3.88151e+06	29.97	1.93196e+06	1.76679e+06	49.42	1.99	1	0.004662	2.33	0.0380456	1.63915	128.96	111.4	1.9
M129T148	1.45509e+06	1.26744e+06	45.67	899401	870798	47.01	1.62	0.69	0.160528	0.79	0.36158	0.832174	129.018	147.8	2.5
M129T603	122434	57046.2	110.65	95718.7	76825.3	112.92	1.28	0.36	0.878477	0.06	0.936588	0.00377506	129.129	603.4	10.1
M129T70	4.80726e+06	4.47993e+06	40.61	3.19215e+06	3.21967e+06	28.25	1.51	0.59	0.0649573	1.19	0.207149	1.13113	129.019	70	1.2
M129T80	2.92306e+06	2.21541e+06	104.62	5.7785e+06	4.73988e+06	38.23	0.51	-0.98	0.014763	1.83	0.078691	1.30962	129.039	80.4	1.3
M129T82	958753	818990	65.59	1.01692e+06	699428	66.97	0.94	-0.08	0.878477	0.06	0.936588	0.136282	128.892	82.2	1.4
M129T84	3.8411e+07	3.70174e+07	15.08	4.56262e+07	4.4473e+07	7.52	0.84	-0.25	0.0379176	1.42	0.147066	1.50126	128.96	84.4	1.4
M129T88	1.82219e+07	1.81648e+07	58.43	2.2546e+07	2.46228e+07	42.89	0.81	-0.31	0.573737	0.24	0.759252	0.488058	129.019	88.3	1.5
M129T96	1.17649e+07	1.22233e+07	58	1.14296e+07	4.13429e+06	122.05	1.03	0.04	0.441803	0.35	0.659657	0.563416	129.019	96.4	1.6
M130T102	1.85289e+07	1.90554e+07	33.78	1.43535e+07	1.28261e+07	43.28	1.29	0.37	0.194872	0.71	0.408126	0.865364	130.051	101.9	1.7
M130T106	46109	47651.5	64.41	60631.5	63419.9	25.49	0.76	-0.4	0.234499	0.63	0.4544	0.83784	130.033	106.1	1.8
M130T125	3.13293e+08	3.22316e+08	41.46	2.89451e+08	2.75093e+08	19.41	1.08	0.11	0.798446	0.1	0.895187	0.0633344	130.087	124.7	2.1
M130T153	8.95501e+07	8.39873e+07	59.23	2.9705e+07	2.80386e+07	34.03	3.01	1.59	0.00699301	2.16	0.0487438	1.5059	130.087	153.2	2.6
M130T32	444556	504579	65.59	423152	142424	146.6	1.05	0.07	0.720901	0.14	0.850988	0.615929	130.015	31.8	0.5
M130T417	31381	34022.7	30.51	28065.3	28725.9	27.07	1.12	0.16	0.441803	0.35	0.659657	0.404094	130.033	417.2	7
M130T457	285467	251197	54.77	71644.7	57927.8	58.85	3.98	1.99	0.0003108	3.51	0.00655521	1.92	130.041	457.1	7.6
M130T88_1	1.35655e+06	1.58532e+06	34.67	997108	1.07868e+06	29.19	1.36	0.44	0.104895	0.98	0.278831	0.932778	130.023	88.4	1.5
M130T95	8.37317e+08	8.34109e+08	18.13	6.11095e+08	6.35158e+08	27.83	1.37	0.45	0.014763	1.83	0.078691	1.26334	130.062	94.7	1.6
M131T102	746061	526717	51.74	1.08093e+06	1.13961e+06	24.46	0.69	-0.53	0.0498834	1.3	0.173853	1.2922	131.054	102	1.7
M131T122	1.42683e+06	1.3988e+06	15.59	830244	845571	63.7	1.72	0.78	0.014763	1.83	0.078691	1.30913	131.071	121.9	2
M131T125	1.36133e+07	1.35706e+07	33.28	7.19765e+06	5.74654e+06	76.11	1.89	0.92	0.0281274	1.55	0.119973	1.37773	131.091	124.7	2.1
M131T133	234747	161390	80.73	79783.1	67611.5	34.78	2.94	1.56	0.0498834	1.3	0.173853	1.2479	130.94	132.7	2.2
M131T154	6.82698e+06	6.67048e+06	18.46	5.73659e+06	4.76353e+06	36.69	1.19	0.25	0.278632	0.55	0.503994	0.843683	131.091	153.7	2.6
M131T216	1.60301e+06	1.47902e+06	50.41	1.16608e+06	1.226e+06	44.71	1.37	0.46	0.505361	0.3	0.709443	0.620018	131.072	216.1	3.6
M131T236	886158	604205	63.81	2.92293e+06	1.51768e+06	138.57	0.3	-1.72	0.0281274	1.55	0.119973	1.30558	131.071	236.3	3.9
M131T355	2.00842e+06	2.45372e+06	52.81	2.59273e+06	2.6674e+06	43.92	0.77	-0.37	0.382284	0.42	0.606076	0.35841	131.071	354.6	5.9
M131T363	1.083e+07	1.04971e+07	22.51	1.04938e+07	1.01168e+07	12.81	1.03	0.05	0.95913	0.02	0.981433	0.144328	130.993	362.9	6
M131T57	1.55579e+06	1.38307e+06	42.71	1.27723e+06	1.15107e+06	27.12	1.22	0.28	0.328205	0.48	0.552488	0.575638	130.94	57.1	1
M131T768	3.07688e+06	2.63817e+06	57.78	6.31953e+06	7.23108e+06	32.51	0.49	-1.04	0.014763	1.83	0.078691	1.53297	130.993	768.1	12.8
M131T815	1.08315e+07	1.06735e+07	34.74	7.20445e+06	6.90946e+06	33.85	1.5	0.59	0.0829837	1.08	0.241068	1.15226	130.993	814.8	13.6
M131T89	4.41435e+07	3.71532e+07	46.82	3.11228e+07	2.87245e+07	56.48	1.42	0.5	0.194872	0.71	0.408126	0.960795	131.083	89	1.5
M131T90	7.09316e+06	7.59147e+06	34.85	5.84726e+06	6.15948e+06	21.34	1.21	0.28	0.234499	0.63	0.4544	0.667415	130.984	90.3	1.5
M131T91	8.53289e+06	9.25735e+06	59.12	4.08336e+06	1.59746e+06	104.04	2.09	1.06	0.0829837	1.08	0.241068	1.14915	131.035	90.9	1.5
M131T95	4.25069e+07	2.31829e+07	96.2	2.28256e+07	1.29611e+07	63.58	1.86	0.9	0.505361	0.3	0.709443	0.662725	131.066	94.7	1.6
M132T114	3.0993e+06	2.96124e+06	19.31	2.20818e+06	2.3092e+06	36.68	1.4	0.49	0.0104118	1.98	0.0628046	0.994785	132.012	113.9	1.9
M132T125	454602	452995	36.03	345892	259455	67.57	1.31	0.39	0.0829837	1.08	0.241068	0.936235	132.092	125.2	2.1
M132T126	241453	217204	34.73	159769	143850	28.81	1.51	0.6	0.014763	1.83	0.078691	1.29433	132.03	125.6	2.1
M132T216	329293	256333	44.83	211101	210792	21.56	1.56	0.64	0.0029526	2.53	0.0288032	1.33794	132.075	216.3	3.6
M132T354	57663.4	13341.3	151.09	24243.7	12284.6	89.83	2.38	1.25	0.798446	0.1	0.895187	0.0586928	132.075	354	5.9
M132T374	388730	267703	74.71	339834	316027	19.98	1.14	0.19	0.720901	0.14	0.850988	0.220276	132.03	373.9	6.2
M132T89	1.29669e+06	1.26789e+06	39.97	1.43511e+06	1500404	29.51	0.9	-0.15	0.645377	0.19	0.808158	0.296784	132.086	89.1	1.5
M132T91	739134	708252	52.22	934678	1.00426e+06	29.18	0.79	-0.34	0.573737	0.24	0.759252	0.646926	131.984	90.6	1.5
M132T94	3.84145e+06	4.1461e+06	59.7	4.54238e+06	4.19865e+06	54.05	0.85	-0.24	0.573737	0.24	0.759252	0.41292	132.067	94.4	1.6
M132T95	3.57824e+06	3.59998e+06	52.9	4.36837e+06	4.21103e+06	37.01	0.82	-0.29	0.382284	0.42	0.606076	0.681329	132.03	95.1	1.6
M133T109	3.69916e+07	3.69999e+07	28.32	4.54777e+07	4.03408e+07	30.03	0.81	-0.3	0.234499	0.63	0.4544	0.786896	133.014	108.8	1.8
M133T137	5.57209e+06	5.79476e+06	36.72	1.24175e+07	1.21914e+07	14.34	0.45	-1.16	0.0001554	3.81	0.00449411	1.92925	132.868	137	2.3
M133T153	1.17528e+07	1.10897e+07	18.6	9.52255e+06	9.76933e+06	16.12	1.23	0.3	0.0379176	1.42	0.147066	1.30128	133.013	153.5	2.6
M133T250	5.78731e+06	5.72935e+06	19.72	2.68028e+06	2.49727e+06	39.13	2.16	1.11	0.0003108	3.51	0.00655521	1.91012	133.014	250.5	4.2
M133T285	5.05316e+06	5.10052e+06	17.51	4.84376e+06	5.01818e+06	14.21	1.04	0.06	0.720901	0.14	0.850988	0.386433	133.014	285.5	4.8
M133T303	2.97925e+06	3.21885e+06	40.17	2.9183e+06	3.24376e+06	31.57	1.02	0.03	0.798446	0.1	0.895187	0.114045	133.014	303.5	5.1
M133T31_2	689493	687562	38.46	571216	521843	24.08	1.21	0.27	0.194872	0.71	0.408126	0.29079	132.923	31	0.5
M133T363	2.02265e+06	2.06827e+06	51.52	2.21534e+06	2.36641e+06	42.75	0.91	-0.13	0.573737	0.24	0.759252	0.258122	133.014	362.9	6
M133T37	12311294	1.21536e+07	40.72	1.11644e+07	1.15337e+07	57.22	1.1	0.14	0.878477	0.06	0.936588	0.490651	132.868	37	0.6
M133T374	1.92678e+06	2.20491e+06	73.06	4.5589e+06	4.62835e+06	36.99	0.42	-1.24	0.0029526	2.53	0.0288032	1.3094	133.014	374.2	6.2
M133T56	1.346e+07	1.46683e+07	69.4	1.86211e+07	2.12684e+07	44.7	0.72	-0.47	0.328205	0.48	0.552488	0.509846	132.868	56	0.9
M133T57	237664	169299	53.59	264675	281920	34.71	0.9	-0.16	0.798446	0.1	0.895187	0.38008	132.935	56.9	0.9
M133T74_1	186931	82105.9	104.64	480726	519913	55.61	0.39	-1.36	0.0498834	1.3	0.173853	1.24896	132.976	74.2	1.2
M133T74_2	1.32139e+09	1.31363e+09	38.19	1.29816e+09	1.46685e+09	44.31	1.02	0.03	0.441803	0.35	0.659657	0.105016	133.014	74.4	1.2
M133T74_3	853785	663686	60.42	989491	945243	31.35	0.86	-0.21	0.160528	0.79	0.36158	0.572336	133.055	74.2	1.2
M133T80	3.69283e+07	3.35554e+07	54.73	2.58556e+07	2.58619e+07	14.7	1.43	0.51	0.160528	0.79	0.36158	0.778601	133.034	80.3	1.3
M133T81	2.41485e+07	2.33607e+07	10.38	2.19717e+07	2.18558e+07	19.51	1.1	0.14	0.278632	0.55	0.503994	0.813865	132.946	81.3	1.4
M133T89	1.80246e+06	1.98075e+06	58.45	2.31249e+06	2.47217e+06	32.65	0.78	-0.36	0.234499	0.63	0.4544	0.752814	133.051	88.7	1.5
M133T97	1.07443e+07	1.02486e+07	21.42	5.18613e+06	5.52118e+06	47.82	2.07	1.05	0.0003108	3.51	0.00655521	1.65242	133.051	96.9	1.6
M134T103	215872	200017	33.98	289233	294943	49.11	0.75	-0.42	0.278632	0.55	0.503994	0.477786	134.028	103.1	1.7
M134T111	56926.9	59024.9	45.93	55790.4	64129.8	42.26	1.02	0.03	0.798446	0.1	0.895187	0.135515	134.074	111.5	1.9
M134T114	116203	112241	39.83	109070	111187	46.03	1.07	0.09	0.878477	0.06	0.936588	0.196873	134.008	113.7	1.9
M134T126	366111	328436	88.28	31616.3	30155.9	36.48	11.58	3.53	0.000621601	3.21	0.0104451	1.77085	134.018	125.7	2.1
M134T184	2.17053e+07	2.25439e+07	16.04	2.27703e+07	2.24451e+07	14.74	0.95	-0.07	0.720901	0.14	0.850988	0.411649	134.047	183.5	3.1
M134T243	6.31637e+06	4.18866e+06	92.2	2.46643e+07	1.10111e+07	152.52	0.26	-1.97	0.0281274	1.55	0.119973	1.33034	134.047	243.4	4.1
M134T284	483072	560613	41.24	849989	889308	23.62	0.57	-0.82	0.0029526	2.53	0.0288032	1.34043	134.018	284.3	4.7
M134T31	62813	63900	24.8	47848	47791.1	22.03	1.31	0.39	0.0498834	1.3	0.173853	1.14915	133.924	30.8	0.5
M134T335	2.16834e+06	2.58122e+06	51.78	2.33422e+06	2.36534e+06	30.88	0.93	-0.11	0.798446	0.1	0.895187	0.447709	134.048	334.9	5.6
M134T378	2.0172e+06	1.99024e+06	12.34	1.89509e+06	1.85916e+06	8.12	1.06	0.09	0.328205	0.48	0.552488	0.763797	134.047	378	6.3
M134T433	2.47495e+06	2.61359e+06	27.43	4.6636e+06	4.10844e+06	53.26	0.53	-0.91	0.0206682	1.68	0.0984557	1.33693	134.048	433	7.2
M134T456	883931	578696	128.82	94676.1	85422.3	47.93	9.34	3.22	0.0001554	3.81	0.00449411	1.86832	134.036	455.7	7.6
M134T74	1.01035e+08	9.83394e+07	45.95	7.37578e+07	7.16571e+07	45.25	1.37	0.45	0.234499	0.63	0.4544	0.719169	134.018	74.4	1.2
M135T122	8.063e+08	8.16934e+08	33.57	1.24039e+09	9.05362e+08	70.48	0.65	-0.62	0.505361	0.3	0.709443	0.72479	135.031	121.9	2
M135T138	7.80052e+06	7.52677e+06	22.81	6.75998e+06	6.8237e+06	32.31	1.15	0.21	0.278632	0.55	0.503994	0.759548	134.865	137.6	2.3
M135T148	2.66297e+08	2.44927e+08	25.6	1.99848e+08	1.71347e+08	34.63	1.33	0.41	0.0206682	1.68	0.0984557	1.2605	135.031	148.5	2.5
M135T149_2	113651	112698	50.11	123229	124026	16.92	0.92	-0.12	0.720901	0.14	0.850988	0.601281	135.073	148.6	2.5
M135T165	2.7675e+07	2.93984e+07	37.64	3.15914e+07	3.17123e+07	19.74	0.88	-0.19	0.505361	0.3	0.709443	0.578382	135.032	165.2	2.8
M135T183	1.16649e+06	1.24701e+06	38.81	1.43781e+06	1.40532e+06	19.93	0.81	-0.3	0.234499	0.63	0.4544	0.67407	135.051	183.1	3.1
M135T243	519783	255737	148.99	850041	875253	52.62	0.61	-0.71	0.104895	0.98	0.278831	0.972728	135.051	243.3	4.1
M135T251	1.3374e+07	1.18811e+07	23.29	1.03749e+07	1.02055e+07	31.7	1.29	0.37	0.160528	0.79	0.36158	1.1027	135.032	250.6	4.2
M135T31	6.62385e+06	6.95011e+06	30.13	5.24801e+06	5.24627e+06	35.9	1.26	0.34	0.194872	0.71	0.408126	0.906345	134.894	30.7	0.5
M135T327	86334.2	93764.1	29.27	85434.4	96811.9	65.28	1.01	0.02	0.95913	0.02	0.981433	0.346437	135.051	326.6	5.4
M135T328	300503	294050	51.06	169959	163570	40.53	1.77	0.82	0.0829837	1.08	0.241068	1.0405	135.02	327.8	5.5
M135T335	55990.7	51633.2	59.73	14162.4	14386.7	60.29	3.95	1.98	0.0029526	2.53	0.0288032	1.57463	135.051	334.9	5.6
M135T37	1.40009e+07	1.45666e+07	31.69	1.06792e+07	1.09292e+07	31.88	1.31	0.39	0.104895	0.98	0.278831	0.874487	134.865	37	0.6
M135T433	247307	241472	60.12	62947.7	47882.9	65.86	3.93	1.97	0.0018648	2.73	0.0213197	1.81502	135.051	433.1	7.2
M135T521	1.95612e+06	1.8955e+06	51.48	1.1247e+06	1.21454e+06	47.15	1.74	0.8	0.0281274	1.55	0.119973	0.901938	135.046	520.6	8.7
M135T528	30762.6	29335.2	46.09	73114.5	81292.3	32.3	0.42	-1.25	0.00699301	2.16	0.0487438	1.52527	135.082	528.5	8.8
M135T56	8.80613e+06	9.94155e+06	50.3	8.82273e+06	1.00716e+07	48.65	1	0	0.798446	0.1	0.895187	0.0404946	134.865	55.6	0.9
M135T74	1.15109e+07	9.41305e+06	67.8	15757130	1.30574e+07	78.42	0.73	-0.45	0.645377	0.19	0.808158	0.279384	135.018	74.4	1.2
M135T798	3.29363e+06	3.26033e+06	17.54	2.68101e+06	2.66734e+06	20.55	1.23	0.3	0.0498834	1.3	0.173853	1.21804	134.865	797.6	13.3
M135T836	4.01115e+07	4.61998e+07	39.09	4.19055e+07	3.59826e+07	28.34	0.96	-0.06	0.95913	0.02	0.981433	0.339069	134.895	836.4	13.9
M136T101	1.05979e+06	1.05466e+06	75.75	1.39099e+06	897242	82.25	0.76	-0.39	0.441803	0.35	0.659657	0.238064	135.988	100.7	1.7
M136T102	4.04553e+06	2.16707e+06	84.49	6.68907e+06	6.77762e+06	16.16	0.6	-0.73	0.160528	0.79	0.36158	1.32851	135.971	102	1.7
M136T122	5.42972e+07	5.78857e+07	19.5	2.89278e+07	2.7823e+07	22.56	1.88	0.91	0.0001554	3.81	0.00449411	2.01706	136.034	121.9	2
M136T148	1.45888e+07	5.66544e+06	131.23	9.75199e+06	7.50408e+06	97.9	1.5	0.58	0.95913	0.02	0.981433	0.0142427	136.034	148.5	2.5
M136T165	1.35353e+06	1.30765e+06	31.79	1.01935e+06	1.08735e+06	37.2	1.33	0.41	0.194872	0.71	0.408126	0.989242	136.034	165.5	2.8
M136T251	620731	506548	53.55	661329	629628	30.29	0.94	-0.09	0.505361	0.3	0.709443	0.353376	136.034	250.6	4.2
M136T31	730505	871707	66.76	235695	220997	17.65	3.1	1.63	0.160528	0.79	0.36158	1.4137	135.894	30.7	0.5
M136T455	1.31739e+06	1.25762e+06	21.2	1.10612e+06	1.12356e+06	12.48	1.19	0.25	0.130381	0.88	0.317655	0.920378	136.051	455.1	7.6
M136T478	1.93231e+06	2.00605e+06	52.44	2.92922e+06	2.76671e+06	56.62	0.66	-0.6	0.160528	0.79	0.36158	0.769189	136.051	478.3	8
M136T520	235417	162222	97.88	709439	711860	40.58	0.33	-1.59	0.004662	2.33	0.0380456	1.47877	136.05	520.2	8.7
M136T603	105565	84897.4	49.06	88612.9	86342.6	36.33	1.19	0.25	0.573737	0.24	0.759252	0.531225	136.017	603.2	10.1
M136T732	1.50879e+06	1.57221e+06	39	1.62767e+06	1.73436e+06	31.52	0.93	-0.11	0.573737	0.24	0.759252	0.233151	135.971	732.2	12.2
M136T74	586270	568528	11.68	451916	454703	13.3	1.3	0.38	0.000621601	3.21	0.0104451	1.74031	136.022	74.1	1.2
M136T766	2.18159e+06	2.15142e+06	16.25	3.0065e+06	3.12312e+06	32.67	0.73	-0.46	0.160528	0.79	0.36158	1.11411	135.971	766.4	12.8
M136T82	4.68763e+06	4.63782e+06	23.09	4.44042e+06	4.09181e+06	31.66	1.06	0.08	0.645377	0.19	0.808158	0.283519	136.033	81.7	1.4
M136T837	3.28417e+06	2.97368e+06	40.65	3.48378e+06	3.4569e+06	17.2	0.94	-0.09	0.798446	0.1	0.895187	0.528565	135.971	836.7	13.9
M137T116	457584	476019	27.84	321766	318589	41.59	1.42	0.51	0.0498834	1.3	0.173853	1.0713	137.024	116.2	1.9
M137T122	2.8963e+06	2.69434e+06	29.77	2.53022e+06	2.30436e+06	28.03	1.14	0.19	0.382284	0.42	0.606076	0.565119	137.035	121.9	2
M137T137	2.32177e+06	2.41269e+06	37.1	2.12028e+06	2.30448e+06	41.68	1.1	0.13	0.878477	0.06	0.936588	0.463269	136.863	136.9	2.3
M137T148	1.11974e+06	1.04999e+06	22.08	1.15841e+06	1.1585e+06	21.5	0.97	-0.05	0.645377	0.19	0.808158	0.159767	137.036	147.7	2.5
M137T294	710990	464998	104.5	70511.7	31911.6	91.85	10.08	3.33	0.014763	1.83	0.078691	1.32209	137.036	293.6	4.9
M137T31	1.88593e+06	1.44619e+06	74.39	1.42404e+06	1.2897e+06	44.81	1.32	0.41	0.645377	0.19	0.808158	0.362874	136.891	30.7	0.5
M137T366	2.7341e+06	2.81948e+06	18.44	2.84928e+06	2.63209e+06	22.24	0.96	-0.06	0.720901	0.14	0.850988	0.173305	137.024	365.9	6.1
M137T54	753574	695738	25.35	724194	683309	22.35	1.04	0.06	0.720901	0.14	0.850988	0.21842	136.91	53.7	0.9
M137T56	4.10243e+06	3.99166e+06	41.28	3.61584e+06	3.11742e+06	68.96	1.13	0.18	0.328205	0.48	0.552488	0.509473	136.863	55.9	0.9
M137T72	991414	995117	34.28	1.25805e+06	1.27078e+06	33.38	0.79	-0.34	0.194872	0.71	0.408126	0.663962	136.965	71.7	1.2
M137T82	1.36219e+06	1.23513e+06	25.12	1.07101e+06	1.12128e+06	63.4	1.27	0.35	0.382284	0.42	0.606076	0.9773	136.918	81.8	1.4
M137T837	1.59894e+07	1.49767e+07	23.23	1.04115e+07	1.10404e+07	16.16	1.54	0.62	0.004662	2.33	0.0380456	1.72955	136.892	836.5	13.9
M137T94	5.92687e+06	6.14852e+06	18.03	3.40444e+06	3.39937e+06	11.47	1.74	0.8	0.0001554	3.81	0.00449411	2.06271	137.036	93.5	1.6
M138T224	1.53534e+06	1.48875e+06	31.55	668641	610253	25.47	2.3	1.2	0.0001554	3.81	0.00449411	1.93272	138.056	223.8	3.7
M138T256	718863	725532	42.04	622348	612830	28.14	1.16	0.21	0.798446	0.1	0.895187	0.342805	138.056	255.7	4.3
M138T31	208131	212291	25.38	143947	141758	40.74	1.45	0.53	0.0829837	1.08	0.241068	1.08572	137.892	30.7	0.5
M138T336	764664	744733	24.27	299162	297714	18.65	2.56	1.35	0.0001554	3.81	0.00449411	2.13079	138.056	335.9	5.6
M138T611	3.33968e+06	3.47875e+06	24.91	5.78854e+06	5.94167e+06	42.86	0.58	-0.79	0.0206682	1.68	0.0984557	1.14124	138.02	611	10.2
M138T637	773935	799309	57.38	965743	918147	44.86	0.8	-0.32	0.382284	0.42	0.606076	0.578005	138.02	637	10.6
M139T118	391385	224297	77.33	352941	357519	29.92	1.11	0.15	0.645377	0.19	0.808158	0.203907	139.004	118.4	2
M139T31	111201	69554.6	118.43	154431	60138.9	119.6	0.72	-0.47	0.573737	0.24	0.759252	0.0438658	138.89	30.7	0.5
M139T37	498918	486097	15.43	400373	439311	28.39	1.25	0.32	0.194872	0.71	0.408126	1.03549	138.86	37	0.6
M139T611	260972	269427	37.33	535891	533494	48.7	0.49	-1.04	0.014763	1.83	0.078691	1.07842	139.023	611.1	10.2
M139T71	367253	376927	23.39	513876	513077	19.93	0.71	-0.48	0.004662	2.33	0.0380456	1.31957	139.04	70.8	1.2
M139T77	2.73202e+06	2.66982e+06	14.54	3.75177e+06	3.69733e+06	17.46	0.73	-0.46	0.0018648	2.73	0.0213197	1.71904	138.98	77	1.3
M140T118	4.39122e+06	4.42952e+06	4.66	4.36398e+06	4.38799e+06	4.13	1.01	0.01	0.720901	0.14	0.850988	0.18312	140.083	118.1	2
M140T80	2.28214e+07	2.41052e+07	37.05	2.99742e+07	3.09898e+07	16.57	0.76	-0.39	0.0649573	1.19	0.207149	1.08977	140.012	80.1	1.3
M140T92	2.80102e+07	2.87255e+07	55.4	2.08163e+07	2.01383e+07	50.91	1.35	0.43	0.441803	0.35	0.659657	0.304862	139.985	92.3	1.5
M141T118	150050	97659.4	84.76	428743	273301	97.65	0.35	-1.51	0.00699301	2.16	0.0487438	1.53896	141.086	118.2	2
M141T120	480382	529966	37.85	832089	714057	41.82	0.58	-0.79	0.0498834	1.3	0.173853	1.36977	141.019	120.1	2
M141T303	479352	351885	68.67	251587	282891	44.21	1.91	0.93	0.0649573	1.19	0.207149	0.928659	140.986	302.9	5
M141T82_2	2.80014e+06	2.89346e+06	19.9	2.0123e+06	1.83121e+06	33.81	1.39	0.48	0.0206682	1.68	0.0984557	1.32	141.056	81.5	1.4
M141T92	412816	420388	9.98	459717	450459	6.28	0.9	-0.16	0.0281274	1.55	0.119973	1.34928	140.988	92	1.5
M142T119	2.30817e+06	2.33315e+06	13.95	1.51028e+06	1.34491e+06	38.28	1.53	0.61	0.004662	2.33	0.0380456	1.57361	142.051	118.7	2
M142T342	656915	648749	27.83	320613	308991	25.47	2.05	1.03	0.000621601	3.21	0.0104451	1.90466	142.087	342.1	5.7
M142T363	132737	131943	27.7	154808	149547	30.16	0.86	-0.22	0.278632	0.55	0.503994	0.536886	142.066	363.2	6.1
M142T441	88986.4	7940.66	149.89	65669	35605.4	149.17	1.36	0.44	0.645377	0.19	0.808158	0.268825	141.997	440.8	7.3
M142T92	2.19578e+06	2.30211e+06	67	2.95567e+06	3.13736e+06	29.83	0.74	-0.43	0.441803	0.35	0.659657	0.755398	141.98	92.3	1.5
M143T100	2.14308e+06	2.21586e+06	61.84	2.04312e+06	2.05622e+06	60.36	1.05	0.07	0.798446	0.1	0.895187	0.00885499	143.046	99.9	1.7
M143T109	1.15412e+06	1.0507e+06	86.11	2.35412e+06	2.78704e+06	66.88	0.49	-1.03	0.104895	0.98	0.278831	0.461144	143.035	108.7	1.8
M143T119	266121	276771	32.93	260634	262767	34.33	1.02	0.03	1	0	1	0.0476333	143.054	118.6	2
M143T31	57496.4	41419.8	91.28	37683.9	27680.4	78.96	1.53	0.61	0.328205	0.48	0.552488	0.459316	142.929	31.4	0.5
M143T539	464580	603790	76.14	542377	596031	55.63	0.86	-0.22	0.645377	0.19	0.808158	0.498837	142.993	538.6	9
M143T679	549942	447313	46.47	1.09566e+06	908039	75.32	0.5	-0.99	0.234499	0.63	0.4544	0.802757	143.108	678.8	11.3
M143T79	1.08669e+06	1.03645e+06	26.04	2.00573e+06	2.05743e+06	33.08	0.54	-0.88	0.00699301	2.16	0.0487438	1.64709	142.975	78.6	1.3
M143T91	3.86638e+06	3.65859e+06	16.04	4.54026e+06	4.62375e+06	16.76	0.85	-0.23	0.0829837	1.08	0.241068	1.10689	143.035	90.9	1.5
M144T107	2.63233e+06	2.31205e+06	30.66	1.93105e+06	1.94927e+06	8.89	1.36	0.45	0.0029526	2.53	0.0288032	1.46372	144.03	107.4	1.8
M144T108	235707	248472	49.22	283194	294057	17.79	0.83	-0.26	0.382284	0.42	0.606076	0.764907	144.002	107.6	1.8
M144T111	7.57165e+06	7.76099e+06	13.5	6.68132e+06	6.92584e+06	31.15	1.13	0.18	0.505361	0.3	0.709443	0.607955	144.103	111.4	1.9
M144T122	2.29179e+06	2.03272e+06	50.92	2.58941e+06	2.10011e+06	45.41	0.89	-0.18	0.798446	0.1	0.895187	0.452944	144.067	122.4	2
M144T128	175714	153923	42.53	186285	156197	55.08	0.94	-0.08	0.95913	0.02	0.981433	0.0920695	143.952	127.6	2.1
M144T303	261407	259242	15.02	159684	161539	29.78	1.64	0.71	0.0003108	3.51	0.00655521	1.65668	143.952	303	5
M144T374	219388	245580	40.89	384093	369353	48.4	0.57	-0.81	0.328205	0.48	0.552488	0.907931	143.952	373.9	6.2
M144T578	1.12482e+07	11839146	31.15	7.89504e+06	7.56515e+06	34.65	1.42	0.51	0.0649573	1.19	0.207149	1.1612	144.046	577.8	9.6
M144T89	2.8909e+06	2.40862e+06	32.75	2.1972e+06	2.1912e+06	24.09	1.32	0.4	0.160528	0.79	0.36158	1.06603	144.03	88.6	1.5
M144T92	1.35359e+07	1.33769e+07	39.54	1.18305e+07	1.26851e+07	40.63	1.14	0.19	0.645377	0.19	0.808158	0.407276	144.067	91.7	1.5
M145T103	5.34729e+07	6.0131e+07	32.12	5.96301e+07	6.38876e+07	20.41	0.9	-0.16	0.382284	0.42	0.606076	0.505478	145.051	102.6	1.7
M145T108	4274391	4.54021e+06	24.34	4.55672e+06	4.47357e+06	20.61	0.94	-0.09	0.645377	0.19	0.808158	0.294258	145.014	107.8	1.8
M145T109	1.81286e+07	2.04066e+07	43.72	2.35797e+07	2.6275e+07	34.98	0.77	-0.38	0.160528	0.79	0.36158	0.731249	145.051	109.3	1.8
M145T112	401869	479578	68.03	587029	616182	42.15	0.68	-0.55	0.130381	0.88	0.317655	0.754469	145.106	111.6	1.9
M145T126	2.08671e+06	1.48442e+06	78.28	2.81568e+06	2.74411e+06	70.06	0.74	-0.43	0.441803	0.35	0.659657	0.459061	145.062	125.9	2.1
M145T148	1.60597e+06	1.55764e+06	12.86	1.44782e+06	1.44917e+06	13.27	1.11	0.15	0.130381	0.88	0.317655	0.986506	144.992	148.1	2.5
M145T303	527762	503436	100.45	7706.93	4667.14	109.55	68.48	6.1	0.000621601	3.21	0.0104451	1.95665	145.014	302.9	5
M145T31	1.52195e+06	1.54442e+06	30.01	1.83973e+06	1.50815e+06	37.76	0.83	-0.27	0.878477	0.06	0.936588	0.702594	144.924	31.1	0.5
M145T374	367176	302615	64.55	68883.2	44538.2	84.75	5.33	2.41	0.0018648	2.73	0.0213197	1.78521	145.014	373.8	6.2
M145T378	1.07278e+06	1.0186e+06	68.18	1.10359e+06	1.15838e+06	52.47	0.97	-0.04	0.95913	0.02	0.981433	0.000254897	145.087	377.5	6.3
M145T399	736373	922339	61.17	2.51397e+06	2.3792e+06	33.03	0.29	-1.77	0.0003108	3.51	0.00655521	1.52133	145.087	398.9	6.6
M145T429	2.97762e+06	2.91664e+06	45.37	1.09643e+06	1.20873e+06	33.15	2.72	1.44	0.004662	2.33	0.0380456	1.73448	144.962	428.9	7.1
M145T578	1.82195e+06	1.82273e+06	24.75	1.4627e+06	1.38488e+06	13.39	1.25	0.32	0.130381	0.88	0.317655	1.09151	145.049	577.8	9.6
M145T61	348417	355452	8.1	310016	312313	6.79	1.12	0.17	0.0206682	1.68	0.0984557	1.51373	144.924	61.4	1
M145T741	1.46445e+07	1.7352e+07	43.4	1.44718e+07	1.48463e+07	43.58	1.01	0.02	0.95913	0.02	0.981433	0.0307489	144.992	741.3	12.4
M145T76	1.07969e+06	1.0449e+06	7.09	1.13156e+06	1.10619e+06	9.5	0.95	-0.07	0.328205	0.48	0.552488	0.614822	145.014	75.8	1.3
M145T768	1.98722e+07	9.3878e+06	123.93	3.99333e+06	2.93866e+06	54.3	4.98	2.32	0.130381	0.88	0.317655	1.04447	144.992	767.8	12.8
M145T785	3.74585e+06	1.67457e+06	137.98	2.1317e+07	2.4195e+07	63.76	0.18	-2.51	0.014763	1.83	0.078691	1.34232	144.992	785.1	13.1
M145T84	8.12323e+06	7.74272e+06	24.32	7.25793e+06	7.00724e+06	14.29	1.12	0.16	0.573737	0.24	0.759252	0.573254	145.098	84	1.4
M145T87	1.9554e+09	6.06324e+08	196.83	3.06355e+09	5.04133e+08	127.72	0.64	-0.65	0.798446	0.1	0.895187	0.141665	145.062	87	1.4
M145T96	1.80025e+06	1.44718e+06	65.67	1.78368e+06	1.81409e+06	11.54	1.01	0.01	0.878477	0.06	0.936588	0.423726	145.014	96.3	1.6
M146T103	3.8903e+06	3.89474e+06	68.83	3.27095e+06	3.09565e+06	59.26	1.19	0.25	0.878477	0.06	0.936588	0.00612396	146.054	102.6	1.7
M146T109	1.57688e+06	1.57148e+06	31.81	459051	354844	57.52	3.44	1.78	0.0003108	3.51	0.00655521	2.03013	146.054	109.4	1.8
M146T126	196432	158359	47.97	141790	122384	64.18	1.39	0.47	0.0829837	1.08	0.241068	0.973603	146.046	125.7	2.1
M146T224	49267.9	48978.8	35.66	83752.9	71732.6	64.01	0.59	-0.77	0.104895	0.98	0.278831	0.624205	146.061	223.8	3.7
M146T32	234544	214114	41.23	255705	194604	54.93	0.92	-0.12	0.798446	0.1	0.895187	0.133065	145.914	31.5	0.5
M146T37	219385	194545	63.87	151269	141422	32.13	1.45	0.54	0.573737	0.24	0.759252	0.565866	145.931	36.9	0.6
M146T374	86257.7	86851.2	43.11	79376.7	78858.4	25.73	1.09	0.12	0.798446	0.1	0.895187	0.108796	146.046	374.2	6.2
M146T80	7.75123e+08	7.8487e+08	7.61	7.16501e+08	7.16644e+08	10.61	1.08	0.11	0.0829837	1.08	0.241068	1.09017	146.046	80.4	1.3
M146T87	2.84945e+07	2.69704e+07	57.77	3.61359e+07	2.99739e+07	42.56	0.79	-0.34	0.104895	0.98	0.278831	0.749059	146.065	87	1.4
M146T89	3.4295e+07	3.39154e+07	8.25	3.28479e+07	3.21893e+07	14.15	1.04	0.06	0.278632	0.55	0.503994	0.487457	146.082	89.5	1.5
M147T104_1	359304	342742	46.42	337043	301165	51.71	1.07	0.09	0.645377	0.19	0.808158	0.240134	146.908	104.1	1.7
M147T104_2	1.7543e+06	1.70292e+06	39.17	597659	741002	64.62	2.94	1.55	0.0010878	2.96	0.0151734	1.69041	146.961	104.3	1.7
M147T104_3	6.43485e+06	6.80851e+06	21.14	6.34259e+06	6.50562e+06	10.15	1.01	0.02	0.720901	0.14	0.850988	0.0618277	147.066	103.8	1.7
M147T116	9.1583e+06	8.36103e+06	25.02	1.15225e+07	1.223e+07	23.94	0.79	-0.33	0.104895	0.98	0.278831	0.953128	146.939	116.1	1.9
M147T120	521490	510802	20.6	657653	639491	18.08	0.79	-0.33	0.0498834	1.3	0.173853	1.17473	147.066	119.8	2
M147T129	3.94411e+06	4.01718e+06	69.34	1.31633e+07	9.60186e+06	102.21	0.3	-1.74	0.645377	0.19	0.808158	0.178162	146.939	128.9	2.1
M147T285	1.03918e+07	9.20719e+06	33.89	7.64032e+06	8.11136e+06	15.79	1.36	0.44	0.130381	0.88	0.317655	1.1148	147.045	285.5	4.8
M147T303	1.33655e+07	1.2941e+07	23.06	8.75912e+06	8.16238e+06	51.78	1.53	0.61	0.0379176	1.42	0.147066	1.35903	147.045	303.4	5.1
M147T37	328596	341770	38.32	6.435e+06	6.28885e+06	24.19	0.05	-4.29	0.0001554	3.81	0.00449411	2.21721	146.939	37.2	0.6
M147T429	850233	763536	42.12	972251	848810	41.33	0.87	-0.19	0.645377	0.19	0.808158	0.511724	146.959	428.7	7.1
M147T52	3.59631e+07	3.78465e+07	34.54	2.48667e+07	2.36647e+07	66.59	1.45	0.53	0.160528	0.79	0.36158	0.908467	146.939	52.2	0.9
M147T55	7.83957e+06	6.95795e+06	34.79	5.98895e+06	5.58844e+06	36.63	1.31	0.39	0.130381	0.88	0.317655	0.865091	146.923	55	0.9
M147T672	801026	50662	188.85	1.40332e+06	546168	159.48	0.57	-0.81	0.0498834	1.3	0.173853	1.06705	146.988	672.3	11.2
M147T70	1.7462e+06	1.76032e+06	10.55	1.63318e+06	1.68201e+06	15.84	1.07	0.1	0.573737	0.24	0.759252	0.68746	146.938	69.6	1.2
M147T732	5.65217e+06	5.75325e+06	54.02	5.36621e+06	5.31896e+06	24.83	1.05	0.07	0.798446	0.1	0.895187	0.210104	146.994	732.4	12.2
M147T765	3.53208e+06	3.42224e+06	22.93	3.24215e+06	3.03354e+06	45.05	1.09	0.12	0.505361	0.3	0.709443	0.512421	146.994	765.4	12.8
M147T773	1.06822e+06	1.00657e+06	41.81	517198	532481	39.22	2.07	1.05	0.0104118	1.98	0.0628046	1.54442	146.994	773.2	12.9
M147T80	5.02008e+07	5.11041e+07	38.07	4.59034e+07	5.00424e+07	42.32	1.09	0.13	0.95913	0.02	0.981433	0.274272	147.049	80.4	1.3
M147T84	1.74545e+07	1.1678e+07	97.3	2.67711e+06	1.7082e+06	104.65	6.52	2.7	0.0281274	1.55	0.119973	1.24929	146.983	84.1	1.4
M147T96	1.50315e+07	1.29992e+07	71.87	2.99387e+07	3.0895e+07	28.84	0.5	-0.99	0.014763	1.83	0.078691	1.34077	147.066	95.6	1.6
M147T99	1.61245e+07	1.70504e+07	25.4	6.82224e+06	8.98331e+06	67.58	2.36	1.24	0.0018648	2.73	0.0213197	1.4623	147.03	98.8	1.6
M148T122	5.37187e+07	5.32977e+07	34.86	4.79404e+07	4.34769e+07	32.05	1.12	0.16	0.573737	0.24	0.759252	0.417987	148.044	121.7	2
M148T285	904014	916454	23.18	532521	583720	24.16	1.7	0.76	0.0018648	2.73	0.0213197	1.77602	148.049	284.9	4.7
M148T37	218433	220947	8.82	235705	234900	14	0.93	-0.11	0.234499	0.63	0.4544	0.682642	147.94	37.3	0.6
M148T381	63949.3	69680.1	52.4	36028.8	15506.5	91.07	1.77	0.83	0.130381	0.88	0.317655	0.888675	148.063	380.8	6.3
M148T457	230876	170003	113.89	372605	269976	108.82	0.62	-0.69	0.878477	0.06	0.936588	0.161379	148.05	456.6	7.6
M148T480	385676	340778	81.98	660983	723072	40.45	0.58	-0.78	0.104895	0.98	0.278831	0.989061	148.05	480.3	8
M148T58	356101	355514	7.99	332577	332881	4.3	1.07	0.1	0.0649573	1.19	0.207149	1.14183	147.942	57.6	1
M148T80	1.13305e+07	1.13989e+07	53.68	1.37086e+07	1.4764e+07	48.57	0.83	-0.27	0.505361	0.3	0.709443	0.517879	148.05	80.4	1.3
M148T96	636449	642167	40.66	705142	669045	31.24	0.9	-0.15	0.720901	0.14	0.850988	0.465146	148.07	95.6	1.6
M148T99	528271	502953	46.3	428968	380783	54.1	1.23	0.3	0.382284	0.42	0.606076	0.476479	148.033	99.5	1.7
M149T104_1	111209	105579	21.45	111692	112811	10.81	1	-0.01	0.645377	0.19	0.808158	0.0884624	148.907	103.9	1.7
M149T104_2	91573.2	84127.3	83.09	126322	133391	37.36	0.72	-0.46	0.441803	0.35	0.659657	0.885434	149.011	104.2	1.7
M149T37	29212	29071.9	23.83	84724.4	75713.7	66.32	0.34	-1.54	0.0206682	1.68	0.0984557	1.38916	148.942	36.9	0.6
M149T399	281766	313752	33.74	211527	188217	30.76	1.33	0.41	0.0498834	1.3	0.173853	0.776444	149.097	399.3	6.7
M149T56	414518	415031	22.56	375510	374075	15.78	1.1	0.14	0.278632	0.55	0.503994	0.407532	148.941	56.1	0.9
M149T57	366477	367661	15.83	276005	296920	26.72	1.33	0.41	0.0206682	1.68	0.0984557	1.21902	148.955	56.7	0.9
M149T617	546274	520613	45.26	1.00936e+06	946332	28.07	0.54	-0.89	0.00699301	2.16	0.0487438	1.57722	149.061	617.4	10.3
M149T82	1.91144e+06	1.84783e+06	8.28	1.9858e+06	1.95479e+06	10.52	0.96	-0.06	0.505361	0.3	0.709443	0.445859	149.046	81.7	1.4
M149T93	2.43425e+06	1.9719e+06	76.78	2.60012e+06	2.55308e+06	22.93	0.94	-0.1	0.160528	0.79	0.36158	0.580658	149.046	93.4	1.6
M150T104	75968.7	69959.3	63.08	87738.1	60694.8	85.88	0.87	-0.21	0.878477	0.06	0.936588	0.0386654	150.003	104.2	1.7
M150T122_1	1.62191e+06	1.70822e+06	73.54	2.56108e+06	2.01434e+06	38.68	0.63	-0.66	0.382284	0.42	0.606076	0.946369	150.023	121.6	2
M150T122_2	1.5477e+06	1.45558e+06	77.72	2.46539e+06	2.02592e+06	39.31	0.63	-0.67	0.278632	0.55	0.503994	1.03046	150.04	121.6	2
M150T176	402395	409080	14.13	275641	267766	23.97	1.46	0.55	0.004662	2.33	0.0380456	1.74498	150.042	175.6	2.9
M150T269	255182	278327	62.73	343775	373061	53.75	0.74	-0.43	0.234499	0.63	0.4544	0.693028	150.041	268.7	4.5
M150T334	87017.5	67816.3	81.5	111230	91986.4	65.31	0.78	-0.35	0.278632	0.55	0.503994	0.50804	150.056	333.7	5.6
M150T617	48759.5	44956.4	59.19	39339.4	32933.7	47.44	1.24	0.31	0.441803	0.35	0.659657	0.289378	150.064	617.3	10.3
M150T620	5.93435e+06	6.0214e+06	37.45	6.05113e+06	5.91244e+06	39.86	0.98	-0.03	0.95913	0.02	0.981433	0.105396	150.002	619.8	10.3
M150T69	1.06566e+06	1.08786e+06	32.82	801908	776616	28.49	1.33	0.41	0.160528	0.79	0.36158	1.007	150.023	68.6	1.1
M150T90	1.51448e+07	1.33163e+07	28.21	1.03833e+07	1.02132e+07	7.78	1.46	0.54	0.0010878	2.96	0.0151734	1.59563	149.987	90.3	1.5
M151T114	488183	494845	12.52	503997	540794	21.86	0.97	-0.05	0.194872	0.71	0.408126	0.102688	151.061	114	1.9
M151T151	1.76943e+08	1.69985e+08	19.97	1.46416e+08	1.49924e+08	29.33	1.21	0.27	0.234499	0.63	0.4544	0.948939	151.026	151	2.5
M151T31	300961	289159	20.09	309330	250890	35.61	0.97	-0.04	0.573737	0.24	0.759252	0.0375958	150.891	30.7	0.5
M151T322	287483	102629	140.43	408049	388811	28.64	0.7	-0.51	0.0829837	1.08	0.241068	1.22726	151.051	322.3	5.4
M151T370	7.96518e+06	1.73873e+06	193.26	527053	418480	56.27	15.11	3.92	0.0003108	3.51	0.00655521	1.6799	150.999	370.2	6.2
M151T433	5.65589e+06	4.79485e+06	78.68	6.0971e+06	6.17771e+06	20.82	0.93	-0.11	0.573737	0.24	0.759252	0.675614	150.999	432.8	7.2
M151T57	138687	138657	16.29	116348	110245	24.28	1.19	0.25	0.104895	0.98	0.278831	1.10881	150.935	57.4	1
M151T603	3.35078e+06	3.32043e+06	45.81	2.85089e+06	3.20015e+06	36.22	1.18	0.23	0.798446	0.1	0.895187	0.313282	151.04	603.2	10.1
M151T619	190008	126343	83.5	285254	294056	67.04	0.67	-0.59	0.505361	0.3	0.709443	0.620679	151.004	619.1	10.3
M151T653	1.34819e+06	1.65004e+06	38.32	941383	988369	40.11	1.43	0.52	0.104895	0.98	0.278831	0.79467	151.026	652.9	10.9
M151T668	401693	461904	62.11	412995	450271	65.55	0.97	-0.04	1	0	1	0.141926	151.149	667.6	11.1
M151T729	1.58484e+07	4.6671e+06	140.96	1.17197e+07	5.69644e+06	152.86	1.35	0.44	0.798446	0.1	0.895187	0.432215	150.999	729.5	12.2
M151T759	2.33324e+07	1.91107e+07	49.26	2.61877e+07	2.45172e+07	41.09	0.89	-0.17	0.645377	0.19	0.808158	0.422355	150.999	759	12.7
M151T768	1.76653e+06	1.57133e+06	39.61	1.1326e+06	1.22699e+06	48.93	1.56	0.64	0.0829837	1.08	0.241068	1.00266	150.999	768.3	12.8
M151T815	1.49434e+07	1.25665e+07	55.77	1.01851e+07	1.04448e+07	44.9	1.47	0.55	0.194872	0.71	0.408126	0.800801	150.999	814.8	13.6
M151T82	1.1903e+07	1.20841e+07	17.81	1.17788e+07	1.17259e+07	21.69	1.01	0.02	1	0	1	0.22986	150.887	82.4	1.4
M151T84	4.78163e+06	4.32367e+06	31.67	4.70424e+06	4.73691e+06	19.32	1.02	0.02	0.441803	0.35	0.659657	0.0225839	151.013	84.2	1.4
M151T91_2	2.17221e+07	1.73638e+07	59.61	1.48287e+07	1.2728e+07	69.48	1.46	0.55	0.160528	0.79	0.36158	0.784053	151.061	90.6	1.5
M152T122	3.64788e+07	3.22343e+07	29.31	2.16929e+07	2.17214e+07	10.38	1.68	0.75	0.0001554	3.81	0.00449411	1.78203	152.029	121.7	2
M152T151	1.07729e+07	1.14798e+07	17.18	9.65384e+06	1.07459e+07	36.79	1.12	0.16	0.645377	0.19	0.808158	0.601694	152.029	151	2.5
M152T31	36507.6	35425.6	35.98	16941	16913.9	23.98	2.15	1.11	0.0010878	2.96	0.0151734	1.75772	151.89	30.8	0.5
M152T523	227723	203314	77.25	335063	389432	71.08	0.68	-0.56	0.645377	0.19	0.808158	0.131043	152.044	522.7	8.7
M152T603	764969	383380	93.42	506946	226351	126.4	1.51	0.59	0.234499	0.63	0.4544	0.704564	152.044	603.3	10.1
M152T619	308159	300368	19.66	476464	374374	44.07	0.65	-0.63	0.0206682	1.68	0.0984557	1.26194	151.998	619.3	10.3
M152T676	660549	515134	76.74	312172	267101	58.2	2.12	1.08	0.234499	0.63	0.4544	0.779767	152.035	675.7	11.3
M152T698	2.43403e+06	2.4791e+06	30.76	2.74934e+06	2.81604e+06	22.59	0.89	-0.18	0.382284	0.42	0.606076	0.634608	152.035	697.9	11.6
M152T89	1.11564e+08	1.1167e+08	11.67	1.07985e+08	1.01637e+08	16.3	1.03	0.05	0.505361	0.3	0.709443	0.425761	152.002	88.7	1.5
M152T91_1	582874	579673	4.3	471768	481724	18.22	1.24	0.31	0.004662	2.33	0.0380456	1.56215	151.982	90.6	1.5
M152T91_2	1.28109e+06	1.25899e+06	32.59	1.77666e+06	1.73124e+06	21.44	0.72	-0.47	0.0281274	1.55	0.119973	1.22342	152.065	90.7	1.5
M153T147	70875.7	75493.9	33.31	68172.3	68977.4	48.4	1.04	0.06	0.645377	0.19	0.808158	0.23032	153.067	146.7	2.4
M153T281	293373	265896	35.89	453442	404421	47.54	0.65	-0.63	0.0649573	1.19	0.207149	1.09308	153.041	281.4	4.7
M153T31	98560.2	121351	47.84	47294.6	31389.1	85.82	2.08	1.06	0.0206682	1.68	0.0984557	1.37497	152.887	30.7	0.5
M153T332	799901	649071	88.72	61769.9	61645.2	56.79	12.95	3.69	0.0003108	3.51	0.00655521	1.89953	153.067	332.4	5.5
M153T355	1.70868e+06	1.94235e+06	41.12	2.03379e+06	1.89412e+06	27.92	0.84	-0.25	0.573737	0.24	0.759252	0.630514	153.021	355.5	5.9
M153T567	142056	152564	47.81	158244	164148	55	0.9	-0.16	0.645377	0.19	0.808158	0.103097	153.092	566.7	9.4
M153T69	2.11272e+06	1.86115e+06	60.13	2.69162e+06	2.51462e+06	21.82	0.78	-0.35	0.328205	0.48	0.552488	1.00992	152.986	69.3	1.2
M153T698	149505	147584	43.16	143752	147887	35.68	1.04	0.06	0.878477	0.06	0.936588	0.0887162	153.039	697.8	11.6
M153T75	1.14732e+06	1.14368e+06	6.87	1.22622e+06	1.2064e+06	6.76	0.94	-0.1	0.0379176	1.42	0.147066	1.10138	152.986	74.9	1.2
M153T82	1.36221e+07	1.23317e+07	37.85	1.17086e+07	1.00902e+07	31.2	1.16	0.22	0.720901	0.14	0.850988	0.538709	152.884	82.4	1.4
M153T89	2.63689e+06	2.35195e+06	44.39	2.85722e+06	2.76359e+06	14.76	0.92	-0.12	0.234499	0.63	0.4544	0.557239	153.006	88.7	1.5
M154T101	7.44371e+06	7.57651e+06	8.29	6.53316e+06	6.33856e+06	9.01	1.14	0.19	0.014763	1.83	0.078691	1.47212	153.982	101.4	1.7
M154T108	1.01458e+06	1.01606e+06	48.51	1.40089e+06	1.3946e+06	61.57	0.72	-0.47	0.328205	0.48	0.552488	0.400996	154.06	108.1	1.8
M154T31	189762	104468	70.28	272863	322764	39.89	0.7	-0.52	0.0649573	1.19	0.207149	0.833427	153.869	31.1	0.5
M154T391	212464	197736	71.33	114674	130501	37.31	1.85	0.89	0.234499	0.63	0.4544	0.787764	154.088	391	6.5
M154T667	185344	162346	61.57	287098	273443	44.56	0.65	-0.63	0.130381	0.88	0.317655	1.03538	154.124	666.5	11.1
M154T720	1.79131e+07	1.99312e+07	46.05	5.36946e+06	5.15733e+06	26.77	3.34	1.74	0.0001554	3.81	0.00449411	1.94647	153.992	720.4	12
M154T733	2.04425e+07	9.09745e+06	136.01	3.03981e+07	1.89958e+07	92.48	0.67	-0.57	0.130381	0.88	0.317655	0.844974	153.992	732.7	12.2
M154T742	6.01206e+06	5.50793e+06	49.57	6.76798e+06	7.06982e+06	41.91	0.89	-0.17	0.720901	0.14	0.850988	0.364679	153.992	741.8	12.4
M154T750	3.10859e+07	2.57321e+07	42.96	2.27436e+07	2.26702e+07	31.9	1.37	0.45	0.278632	0.55	0.503994	0.93653	153.992	750	12.5
M154T760	325183	303254	23.01	218101	196313	32.43	1.49	0.58	0.014763	1.83	0.078691	1.56804	154.064	760	12.7
M154T766	3.14649e+08	1.88785e+08	134.82	7.28849e+07	6.18719e+07	79.34	4.32	2.11	0.014763	1.83	0.078691	1.442	153.992	766.4	12.8
M154T783	6.62348e+07	5.08738e+07	61.08	2.53626e+07	1.72546e+07	85.36	2.61	1.38	0.0379176	1.42	0.147066	1.45013	153.992	783.4	13.1
M154T794	63561014	5.795e+07	40.58	6.34348e+07	6.9855e+07	33.52	1	0	0.573737	0.24	0.759252	0.101231	153.992	794	13.2
M154T798	2.43159e+06	2.32308e+06	18.4	2.28227e+06	2.41264e+06	40.66	1.07	0.09	0.878477	0.06	0.936588	0.594312	153.869	797.8	13.3
M154T809	8.21578e+07	8.01239e+07	50.47	7.5187e+07	5.64615e+07	56.54	1.09	0.13	0.95913	0.02	0.981433	0.272897	153.992	809.4	13.5
M154T816	4.68977e+06	4.1162e+06	70.93	6.8804e+06	4.94486e+06	69.95	0.68	-0.55	0.382284	0.42	0.606076	0.745773	153.869	815.9	13.6
M154T819	1.13131e+08	1.0519e+08	33.57	1.07287e+08	1.22717e+08	39.88	1.05	0.08	0.878477	0.06	0.936588	0.375365	153.992	818.7	13.6
M154T832	5.58973e+07	4.76757e+07	50.43	4.56242e+07	4.75871e+07	35.05	1.23	0.29	0.505361	0.3	0.709443	0.444728	153.992	832.5	13.9
M154T836	1.89144e+07	1.97295e+07	51.41	1.25093e+07	9.20882e+06	64.12	1.51	0.6	0.194872	0.71	0.408126	0.656908	153.869	836.3	13.9
M154T89	5.91691e+06	6.62858e+06	51.36	2.80228e+06	981307	97.76	2.11	1.08	0.0281274	1.55	0.119973	1.27048	153.998	88.7	1.5
M154T94	3.91943e+08	3.96864e+08	59.54	5.90725e+08	4.87879e+08	53.6	0.66	-0.59	0.328205	0.48	0.552488	0.895048	154.062	93.7	1.6
M155T108	1.79665e+06	1.64076e+06	42.81	1.34153e+06	1.33234e+06	23.81	1.34	0.42	0.278632	0.55	0.503994	0.857337	155.035	108	1.8
M155T121	1.04972e+06	962261	30.12	868462	927487	30.06	1.21	0.27	0.505361	0.3	0.709443	0.683623	155.035	120.6	2
M155T31	18836.1	19790.9	13.35	17103.1	17668.1	10.15	1.1	0.14	0.0829837	1.08	0.241068	0.931117	154.869	31.1	0.5
M155T344	994562	1.072e+06	18.84	1.09128e+06	1.00776e+06	27.29	0.91	-0.13	0.720901	0.14	0.850988	0.367077	155.071	343.9	5.7
M155T393	1.03122e+07	1.04429e+07	23.26	8.70101e+06	9.49233e+06	50.84	1.19	0.25	0.798446	0.1	0.895187	0.784853	155.035	393.4	6.6
M155T572	325939	308297	49.97	280175	195438	100.6	1.16	0.22	0.441803	0.35	0.659657	0.786133	155.108	572.4	9.5
M155T648	1.0023e+06	853718	41.63	566895	500145	65.16	1.77	0.82	0.00699301	2.16	0.0487438	1.47576	155.108	647.6	10.8
M155T82_1	3.93707e+06	3.96564e+06	26.34	4.08866e+06	4.73144e+06	44.72	0.96	-0.05	0.441803	0.35	0.659657	0.432679	154.881	82.4	1.4
M155T82_2	9.82721e+06	9.74236e+06	4.84	1.30006e+07	1.31919e+07	6.72	0.76	-0.4	0.0001554	3.81	0.00449411	2.13985	154.928	82	1.4
M155T93	1.40475e+06	1.31806e+06	38.16	882079	864790	13.13	1.59	0.67	0.0498834	1.3	0.173853	1.36374	155.035	92.6	1.5
M155T94_1	3.94695e+06	3.66111e+06	34.8	2.60879e+06	2.56141e+06	19.85	1.51	0.6	0.0206682	1.68	0.0984557	1.2816	155.046	93.7	1.6
M155T97	5.96874e+06	5.33723e+06	34.79	5.45166e+06	6.15094e+06	30.87	1.09	0.13	0.95913	0.02	0.981433	0.346801	155.01	96.7	1.6
M156T104	666225	701456	32.68	476118	390997	63.95	1.4	0.48	0.194872	0.71	0.408126	0.9982	155.874	103.8	1.7
M156T107	315454	175232	105.11	268672	268643	27.07	1.17	0.23	0.234499	0.63	0.4544	0.40948	155.953	107.4	1.8
M156T126	132932	129043	20.53	96157	90539.3	32.83	1.38	0.47	0.0649573	1.19	0.207149	1.41647	155.953	126.3	2.1
M156T31	131590	156886	61.19	100174	95746.3	54.54	1.31	0.39	0.573737	0.24	0.759252	0.373556	155.916	30.8	0.5
M156T326	105147	90815.8	50.26	162966	93715.3	87.2	0.65	-0.63	0.95913	0.02	0.981433	0.487614	156.042	326	5.4
M156T37	531062	487296	26.11	624444	656338	18.95	0.85	-0.23	0.234499	0.63	0.4544	0.824478	155.874	37	0.6
M156T393	517431	526989	11.71	589833	587558	19.54	0.88	-0.19	0.234499	0.63	0.4544	0.83996	156.038	393.4	6.6
M156T408	729333	684586	30.56	557074	535215	20.72	1.31	0.39	0.0649573	1.19	0.207149	1.11743	156.103	408.4	6.8
M156T54	296262	333307	40.05	235861	261542	37.4	1.26	0.33	0.130381	0.88	0.317655	0.538234	155.874	54.4	0.9
M156T631	367533	376937	39.8	273721	248645	44.17	1.34	0.43	0.234499	0.63	0.4544	0.863004	155.874	630.8	10.5
M156T644	1.35861e+06	1.38406e+06	28.82	1.46424e+06	1.52864e+06	26.13	0.93	-0.11	0.505361	0.3	0.709443	0.324352	155.875	644.4	10.7
M156T686	1.31608e+06	1.4785e+06	42.13	1.96084e+06	1.85958e+06	49.92	0.67	-0.58	0.234499	0.63	0.4544	0.507601	155.875	686.1	11.4
M156T72	2.0407e+06	1.36038e+06	107.04	4.59642e+06	1.42672e+06	154.44	0.44	-1.17	0.382284	0.42	0.606076	0.634184	155.978	72.4	1.2
M156T723	1.02149e+07	1.00286e+07	44.73	8.14084e+06	3.52858e+06	126.48	1.25	0.33	0.194872	0.71	0.408126	0.988202	155.874	722.5	12
M156T750	1.68329e+06	1.69178e+06	50.3	1.35902e+06	1.41158e+06	36.69	1.24	0.31	0.505361	0.3	0.709443	0.494922	155.874	750.1	12.5
M156T836	6.7816e+06	6.61146e+06	32.93	7.86589e+06	6.83695e+06	43.59	0.86	-0.21	0.505361	0.3	0.709443	0.363274	155.866	836.3	13.9
M156T85	4.79389e+06	5.07861e+06	29.13	5.40697e+06	5.3345e+06	6.78	0.89	-0.17	0.234499	0.63	0.4544	0.617901	156.028	85.2	1.4
M156T88	1.55793e+06	1.51095e+06	16.82	1.55089e+06	1.6022e+06	17.26	1	0.01	0.798446	0.1	0.895187	0.0326405	156.078	88.4	1.5
M156T94	1.69401e+06	1.6978e+06	6.24	1.59868e+06	1.56476e+06	15.91	1.06	0.08	0.441803	0.35	0.659657	0.71552	156.066	93.6	1.6
M157T753	9.05146e+06	8.4149e+06	57.78	6.12006e+06	5.96645e+06	44.48	1.48	0.56	0.0829837	1.08	0.241068	0.00602319	157.123	753.5	12.6
M157T82	4.33595e+06	4.00025e+06	22.8	3.32527e+06	3.56161e+06	32.61	1.3	0.38	0.130381	0.88	0.317655	1.05231	156.925	82	1.4
M157T85	3.42957e+08	3.26203e+08	51.96	2.82533e+08	2.88961e+08	63.22	1.21	0.28	0.720901	0.14	0.850988	0.636543	157.012	84.7	1.4
M157T90_1	1.11605e+06	1.1086e+06	25.47	939814	1.03504e+06	35.88	1.19	0.25	0.573737	0.24	0.759252	0.753724	156.999	89.5	1.5
M157T90_2	450293	353367	97.31	700924	713114	22.11	0.64	-0.64	0.505361	0.3	0.709443	1.14558	157.062	89.9	1.5
M157T98	2.60946e+06	2.20398e+06	62.6	995984	901906	49.9	2.62	1.39	0.004662	2.33	0.0380456	1.53633	156.963	98.5	1.6
M158T104	493620	224596	91.43	550504	628363	51.03	0.9	-0.16	0.441803	0.35	0.659657	0.50391	157.872	103.8	1.7
M158T111_1	2.95849e+06	2.86225e+06	76.87	4.29409e+06	4.18893e+06	55.55	0.69	-0.54	0.328205	0.48	0.552488	0.676908	158.082	111.4	1.9
M158T111_2	268634	261321	31.19	381053	399843	42.99	0.7	-0.5	0.160528	0.79	0.36158	0.87578	158.119	111.4	1.9
M158T121	2.38455e+06	2.34256e+06	16.93	2.01722e+06	2.04199e+06	9.94	1.18	0.24	0.0829837	1.08	0.241068	1.22743	158.046	121.5	2
M158T127	184052	185396	65.67	244531	229299	44.73	0.75	-0.41	0.798446	0.1	0.895187	0.515732	157.931	126.7	2.1
M158T148	420366	414670	13.67	289587	264532	21.4	1.45	0.54	0.0010878	2.96	0.0151734	1.71837	158.046	147.7	2.5
M158T285	419985	352274	56.31	154830	162310	74.05	2.71	1.44	0.0029526	2.53	0.0288032	1.23999	157.931	285.2	4.8
M158T304	4.76541e+06	4.59468e+06	19.1	3.51492e+06	3.37056e+06	32.95	1.36	0.44	0.014763	1.83	0.078691	1.31723	158.082	304.2	5.1
M158T374	371758	364567	58.93	214309	241088	48.34	1.73	0.79	0.0649573	1.19	0.207149	0.959911	157.931	374.1	6.2
M158T431	55891.6	48096.8	62.47	116872	94723.4	48.26	0.48	-1.06	0.0379176	1.42	0.147066	1.48109	158.119	430.5	7.2
M158T461	96321.3	96447.4	22.49	147945	140534	28.04	0.65	-0.62	0.004662	2.33	0.0380456	1.48743	158.065	461	7.7
M158T54	221883	216249	15.88	212235	215568	11.86	1.05	0.06	0.798446	0.1	0.895187	0.366483	157.872	54.4	0.9
M158T754	635667	608566	83.21	552279	524093	61.64	1.15	0.2	0.95913	0.02	0.981433	0.224313	158.127	753.5	12.6
M158T90	788723	945331	51.35	690306	526457	80.86	1.14	0.19	0.720901	0.14	0.850988	0.333326	158.046	90.4	1.5
M158T97	897816	927845	10.21	883020	883231	5.45	1.02	0.02	0.645377	0.19	0.808158	0.187043	158.046	97.4	1.6
M159T116_2	57992.2	56855.1	12.7	55672.4	55486.3	7.84	1.04	0.06	0.720901	0.14	0.850988	0.410104	159.001	115.8	1.9
M159T128	757259	789817	39.16	983440	1.01191e+06	20.4	0.77	-0.38	0.104895	0.98	0.278831	0.914546	158.978	128.1	2.1
M159T141	530295	571653	41.03	279177	159513	76.93	1.9	0.93	0.0281274	1.55	0.119973	1.43532	158.847	141.3	2.4
M159T304	280232	351563	55.38	275462	312971	58.72	1.02	0.02	0.798446	0.1	0.895187	0.0567072	159.086	304.2	5.1
M159T32	34922.5	32223.4	43.41	40687.7	36431.9	41.97	0.86	-0.22	0.382284	0.42	0.606076	0.3979	158.932	31.6	0.5
M159T329	297425	105822	119.39	50135.4	57952.3	62.27	5.93	2.57	0.104895	0.98	0.278831	0.958072	158.991	328.8	5.5
M159T369	164316	109156	59.85	174065	180474	48.12	0.94	-0.08	0.720901	0.14	0.850988	0.137108	158.847	368.7	6.1
M159T387	1.55708e+06	1.60602e+06	27.25	1.4729e+06	1.48499e+06	14.18	1.06	0.08	0.278632	0.55	0.503994	0.150941	159.103	387.2	6.5
M159T393	319664	202440	94.62	310899	196307	80.74	1.03	0.04	0.95913	0.02	0.981433	0.0231796	158.99	393.4	6.6
M159T453	29209.4	32743.6	53.95	40491.5	37027.9	53.4	0.72	-0.47	0.505361	0.3	0.709443	0.661261	159.082	453.4	7.6
M159T465	3.59795e+07	2.35426e+07	98.97	4.29783e+06	2.95823e+06	95.49	8.37	3.07	0.0010878	2.96	0.0151734	1.72667	159.102	465.1	7.8
M159T497	3.63006e+06	3.178e+06	59.18	6874208	6.72189e+06	33.72	0.53	-0.92	0.014763	1.83	0.078691	1.36919	159.102	496.6	8.3
M159T525	99945.7	107907	46.81	119837	81953.6	99.29	0.83	-0.26	0.95913	0.02	0.981433	0.35668	159.056	525.3	8.8
M159T550	93885.7	80827.3	63.36	21369	7695.88	205.17	4.39	2.14	0.0029526	2.53	0.0288032	1.82454	159.056	549.8	9.2
M159T698	3.46886e+06	2.87847e+06	58.39	2.13614e+06	2.19614e+06	44.69	1.62	0.7	0.194872	0.71	0.408126	0.754583	158.847	698.3	11.6
M159T79	2.64326e+07	2.22099e+07	49.32	4.29215e+07	4.37698e+07	32.74	0.62	-0.7	0.0498834	1.3	0.173853	1.15911	158.925	78.7	1.3
M159T85	1.81907e+06	909689	108.33	2.20534e+06	2.04921e+06	90.38	0.82	-0.28	0.505361	0.3	0.709443	0.43467	159.016	84.6	1.4
M159T89	793280	788239	43.48	439874	508783	35.92	1.8	0.85	0.0104118	1.98	0.0628046	1.07063	159.072	89.2	1.5
M159T90	5.2156e+07	4.35175e+07	76.5	9.983e+06	7.48516e+06	102.47	5.22	2.39	0.014763	1.83	0.078691	1.32997	158.978	90.1	1.5
M159T97	2.165e+06	2.362e+06	40.31	940319	924652	16.43	2.3	1.2	0.00699301	2.16	0.0487438	1.69193	159.03	96.6	1.6
M160T116	1.22121e+06	1.11487e+06	63.6	2.09524e+06	2.27643e+06	38.87	0.58	-0.78	0.0829837	1.08	0.241068	1.16848	160.061	116.2	1.9
M160T119	187865	179565	43.24	248414	265725	14.44	0.76	-0.4	0.160528	0.79	0.36158	0.994202	160.007	118.8	2
M160T31	26024.3	19580.2	89.59	34210.7	29042	58.33	0.76	-0.39	0.130381	0.88	0.317655	0.59349	159.939	31.2	0.5
M160T32	153681	119449	56.52	82963.4	83412.8	6.62	1.85	0.89	0.104895	0.98	0.278831	1.23404	159.894	31.5	0.5
M160T431	362880	320622	46.22	66501.1	41740.5	72.08	5.46	2.45	0.0001554	3.81	0.00449411	1.93108	160.052	430.9	7.2
M160T465	1.18067e+06	1.24085e+06	43.49	2.15363e+06	2109363	30.26	0.55	-0.87	0.00699301	2.16	0.0487438	1.18746	160.106	465.1	7.8
M160T497	296790	332273	38.94	444004	460268	40.94	0.67	-0.58	0.0379176	1.42	0.147066	0.567494	160.106	496.6	8.3
M160T90	3.89969e+06	4.99054e+06	76.75	6.50797e+06	6.67819e+06	12.7	0.6	-0.74	0.0649573	1.19	0.207149	1.13646	159.979	90.2	1.5
M160T99_1	548085	306148	93.88	1.04109e+06	1.18621e+06	46.94	0.53	-0.93	0.0829837	1.08	0.241068	1.17059	159.979	99.3	1.7
M161T134	1.28402e+07	1.36957e+07	21.93	7.97994e+06	8.39988e+06	19.28	1.61	0.69	0.0010878	2.96	0.0151734	1.73692	160.842	134.5	2.2
M161T31_1	124243	124105	9.53	98218.4	98598.2	10.82	1.26	0.34	0.000621601	3.21	0.0104451	1.86552	160.918	30.8	0.5
M161T31_2	113853	109074	15.38	91835.9	87736	17.75	1.24	0.31	0.0206682	1.68	0.0984557	1.411	160.936	31.1	0.5
M161T310	135211	132379	23.06	136345	127132	32.92	0.99	-0.01	0.878477	0.06	0.936588	0.112115	160.897	309.6	5.2
M161T32	234777	193963	71.49	216395	199303	66.34	1.08	0.12	0.95913	0.02	0.981433	0.17878	160.893	31.6	0.5
M161T384	2.56846e+07	2.6132e+07	26.97	2.50769e+07	2.36324e+07	19.51	1.02	0.03	0.573737	0.24	0.759252	0.0434961	160.842	384.1	6.4
M161T465	68945.8	63747	51.14	26773.8	30379.9	56.16	2.58	1.36	0.004662	2.33	0.0380456	1.3329	161.107	465.2	7.8
M161T517	4.87554e+07	4.67686e+07	25.99	9.96996e+06	6.54365e+06	88.42	4.89	2.29	0.0001554	3.81	0.00449411	2.08778	160.842	517.1	8.6
M161T592	2.31038e+07	2.05879e+07	30.6	1.48349e+07	1.36127e+07	39.87	1.56	0.64	0.0649573	1.19	0.207149	1.40549	160.842	591.9	9.9
M161T602	5.27535e+07	5.13728e+07	51.34	6.16806e+07	5.79359e+07	53.55	0.86	-0.23	0.645377	0.19	0.808158	0.205545	160.842	601.7	10
M161T683	1.15741e+08	1.30021e+08	49.31	7.85188e+07	8.67326e+07	29.03	1.47	0.56	0.194872	0.71	0.408126	0.744621	160.842	682.6	11.4
M161T697_1	5.21626e+07	4.65262e+07	51.38	4.62295e+07	3.86626e+07	62.18	1.13	0.17	0.505361	0.3	0.709443	0.435774	160.842	697.5	11.6
M161T70	1.10175e+06	1.20784e+06	30.71	971950	1.02875e+06	39.81	1.13	0.18	0.505361	0.3	0.709443	0.391337	161.009	70.3	1.2
M161T754	5.51845e+06	4.97616e+06	73.74	2.50401e+06	1.25231e+06	106.35	2.2	1.14	0.0829837	1.08	0.241068	1.01417	160.842	754	12.6
M161T82	5.56676e+07	4.65067e+07	79.96	3.57016e+07	3.63339e+07	31.73	1.56	0.64	0.798446	0.1	0.895187	0.291917	160.842	81.8	1.4
M161T83_1	1.33967e+06	1.08513e+06	55.14	1.00023e+06	1.0205e+06	47.75	1.34	0.42	0.441803	0.35	0.659657	0.688422	160.915	83.1	1.4
M161T83_2	859255	810113	34.96	398952	398188	33.34	2.15	1.11	0.0003108	3.51	0.00655521	1.72038	161.057	82.5	1.4
M161T89	1.34762e+06	1.26736e+06	62.8	1.47389e+06	1.2385e+06	71.31	0.91	-0.13	0.798446	0.1	0.895187	0.0398734	161.009	89.4	1.5
M161T90	4.76345e+06	4.31765e+06	39.62	4.34424e+06	3.82064e+06	33.41	1.1	0.13	0.573737	0.24	0.759252	0.198074	160.976	90.2	1.5
M161T99_1	748557	756765	47.68	1.21403e+06	1.21665e+06	28.41	0.62	-0.7	0.0206682	1.68	0.0984557	1.36666	160.976	99.5	1.7
M161T99_2	794250	763085	78.34	564704	527412	103.47	1.41	0.49	0.234499	0.63	0.4544	0.824452	161.065	99	1.6
M162T111	452598	442867	12.12	430442	419245	11.14	1.05	0.07	0.441803	0.35	0.659657	0.565697	162.023	110.6	1.8
M162T138	186360	196765	24.68	189640	186742	18.96	0.98	-0.03	0.798446	0.1	0.895187	0.17714	161.843	138.4	2.3
M162T139	547647	576353	14.78	659747	627276	17.9	0.83	-0.27	0.0649573	1.19	0.207149	1.13147	162.023	138.9	2.3
M162T149	249073	204173	82.51	165385	190338	60.78	1.51	0.59	0.505361	0.3	0.709443	0.452118	162.042	149.1	2.5
M162T303	125110	52786.7	91.18	189716	147094	82.58	0.66	-0.6	0.278632	0.55	0.503994	0.829956	162.056	303.4	5.1
M162T31	87054.3	71015.4	65.56	87495.4	65517.3	96.3	0.99	-0.01	0.95913	0.02	0.981433	0.371566	161.914	31.1	0.5
M162T374	4.59511e+06	4.95998e+06	40.02	3.09766e+06	1.23007e+06	100.83	1.48	0.57	0.278632	0.55	0.503994	0.915722	162.056	374.1	6.2
M162T383	49276.5	33298.8	70.15	89840.2	82671.4	38.52	0.55	-0.87	0.0498834	1.3	0.173853	1.29371	161.843	383.2	6.4
M162T660	240419	205647	40.71	288265	226408	62.72	0.83	-0.26	0.798446	0.1	0.895187	0.251578	162.056	660.3	11
M162T698	1.26889e+06	1.27843e+06	61.02	1.33077e+06	1.13953e+06	83.89	0.95	-0.07	0.878477	0.06	0.936588	0.278582	161.843	697.8	11.6
M162T82	1.15566e+06	1.11872e+06	21.17	1.22411e+06	1.17262e+06	19.05	0.94	-0.08	0.645377	0.19	0.808158	0.339025	161.843	81.8	1.4
M162T83	3.69346e+06	3.61352e+06	25.37	3.23869e+06	3.32245e+06	17.42	1.14	0.19	0.505361	0.3	0.709443	0.667761	161.994	83.4	1.4
M162T91_1	424277	382557	44.01	512014	523140	14.95	0.83	-0.27	0.160528	0.79	0.36158	0.879709	162.049	91.3	1.5
M162T91_2	786046	822359	49.39	433230	306645	68.65	1.81	0.86	0.130381	0.88	0.317655	1.02905	162.077	90.9	1.5
M163T100	273501	247960	22.74	258919	256668	22.78	1.06	0.08	0.95913	0.02	0.981433	0.36611	163.061	100.3	1.7
M163T112	244605	248890	14.18	195858	203882	23.26	1.25	0.32	0.0379176	1.42	0.147066	1.32026	163.013	112.1	1.9
M163T118	535636	559776	35.16	520305	428942	38.08	1.03	0.04	0.720901	0.14	0.850988	0.147035	163.025	118.4	2
M163T122	1.41666e+06	1.40802e+06	17.58	750844	650851	35.69	1.89	0.92	0.0003108	3.51	0.00655521	1.90188	163.04	122.1	2
M163T141	2.46013e+06	2.25084e+06	44.09	1.63677e+06	1.55692e+06	44.07	1.5	0.59	0.130381	0.88	0.317655	1.19024	162.839	141.1	2.4
M163T147	871424	800917	40.21	336055	343792	57.49	2.59	1.37	0.0018648	2.73	0.0213197	1.67306	163.04	147.4	2.5
M163T310	381928	367841	26.86	388846	408567	39.15	0.98	-0.03	0.573737	0.24	0.759252	0.235204	162.894	309.7	5.2
M163T32	229728	228973	10.68	206151	206601	3.47	1.11	0.16	0.0829837	1.08	0.241068	1.37932	162.894	31.6	0.5
M163T384	1.74616e+07	1.97136e+07	42.34	1.85537e+07	1.9093e+07	48.52	0.94	-0.09	0.645377	0.19	0.808158	0.136364	162.839	384.4	6.4
M163T396	1.26538e+06	1.08875e+06	101.97	2.02129e+06	1.98105e+06	36.15	0.63	-0.68	0.278632	0.55	0.503994	1.12282	163.04	395.5	6.6
M163T421	144667	84820.5	75.36	443408	222320	142.46	0.33	-1.62	0.0498834	1.3	0.173853	1.14483	163.077	420.6	7
M163T479	888106	765427	47.83	814121	752753	50.13	1.09	0.13	0.720901	0.14	0.850988	0.221426	163.062	478.9	8
M163T498	1.2049e+06	1.18781e+06	42.78	660130	646617	44.85	1.83	0.87	0.0281274	1.55	0.119973	1.15715	162.999	497.8	8.3
M163T517	2.3064e+07	2.23613e+07	51.82	3.47062e+07	2.67786e+07	86.78	0.66	-0.59	0.382284	0.42	0.606076	0.292197	162.839	516.6	8.6
M163T550	505842	459963	80.07	105513	51282.4	158.8	4.79	2.26	0.00699301	2.16	0.0487438	1.68301	162.954	549.9	9.2
M163T582	47995.5	51663.8	31.13	43820.2	45820	41.88	1.1	0.13	0.798446	0.1	0.895187	0.339465	163.077	581.9	9.7
M163T592	4.40353e+07	3.88045e+07	51.11	5.872e+07	5.70126e+07	30.93	0.75	-0.42	0.130381	0.88	0.317655	0.941916	162.839	592.2	9.9
M163T60	258092	260194	16.55	207763	206159	17.43	1.24	0.31	0.014763	1.83	0.078691	1.33618	162.894	60	1
M163T609	951068	857753	44.01	1.4287e+06	1.04581e+06	68.49	0.67	-0.59	0.441803	0.35	0.659657	0.698583	163.04	608.9	10.1
M163T655	1.48549e+08	1.50161e+08	63.25	6.9761e+08	1.93179e+08	169.85	0.21	-2.23	0.798446	0.1	0.895187	0.601732	162.839	655.1	10.9
M163T686	518936	435842	67.83	251402	274294	78.1	2.06	1.05	0.194872	0.71	0.408126	0.789758	163.076	685.8	11.4
M163T692	233327	56136.4	218.12	43539.6	36341.1	48.3	5.36	2.42	0.194872	0.71	0.408126	0.754465	163.077	691.9	11.5
M163T698	4.07807e+07	4.70805e+07	42.19	3.65481e+07	3.78252e+07	52.56	1.12	0.16	0.645377	0.19	0.808158	0.318418	162.839	697.9	11.6
M163T75	6.44569e+06	7.66797e+06	49.1	5.25312e+06	5.23112e+06	44.4	1.23	0.3	0.234499	0.63	0.4544	0.0172267	163.025	74.5	1.2
M163T82_1	5.5465e+07	5.39238e+07	21.08	5.30749e+07	5.47459e+07	44.98	1.05	0.06	0.95913	0.02	0.981433	0.528955	162.839	81.8	1.4
M163T82_2	1.0985e+06	1.1511e+06	15.95	1.19876e+06	1.18651e+06	20.41	0.92	-0.13	0.328205	0.48	0.552488	0.479074	163.025	82	1.4
M163T84	3.59709e+06	4.00308e+06	48.45	3.69261e+06	3.98991e+06	37.38	0.97	-0.04	0.95913	0.02	0.981433	0.29584	162.957	84.1	1.4
M163T89	1.57772e+06	1.17487e+06	105.82	2.61742e+06	2.13601e+06	41.97	0.6	-0.73	0.014763	1.83	0.078691	1.21108	163.025	89.5	1.5
M163T96	7.04031e+06	6.93588e+06	55.45	7.22407e+06	7.45651e+06	35.42	0.97	-0.04	0.798446	0.1	0.895187	0.176462	163.018	95.7	1.6
M164T112	138518	125020	85.66	220744	203519	37.6	0.63	-0.67	0.160528	0.79	0.36158	1.03305	164.083	112	1.9
M164T139	198082	193741	29.39	282880	201625	79.31	0.7	-0.51	0.798446	0.1	0.895187	0.421645	163.84	138.7	2.3
M164T285	4.11693e+08	3.30526e+08	57.92	1.68319e+08	1.56978e+08	60.67	2.45	1.29	0.004662	2.33	0.0380456	1.57381	164.072	285.5	4.8
M164T303_1	64175	59531.6	48.65	34887.7	22827.8	83.12	1.84	0.88	0.0281274	1.55	0.119973	1.27293	164.019	303.1	5.1
M164T303_2	2.55181e+08	2.56332e+08	22.9	1.43239e+08	1.23219e+08	37.36	1.78	0.83	0.0029526	2.53	0.0288032	1.71741	164.072	303.4	5.1
M164T303_3	100118	106427	34.18	97163.4	92469.6	59.89	1.03	0.04	0.95913	0.02	0.981433	0.420495	164.127	303.1	5.1
M164T349	2.49173e+06	2.43689e+06	52.78	2.05312e+06	2.08123e+06	30.26	1.21	0.28	0.441803	0.35	0.659657	0.301083	164.035	349.1	5.8
M164T498	2.69822e+06	2.78269e+06	25.8	2.07096e+06	1.58795e+06	64.59	1.3	0.38	0.194872	0.71	0.408126	0.959138	164.07	498.1	8.3
M164T530	1.03889e+06	1.05373e+06	44.21	1.54254e+06	1.78585e+06	40.11	0.67	-0.57	0.0498834	1.3	0.173853	0.976178	164.07	530.2	8.8
M164T542	1.54939e+06	1.35583e+06	44.04	1.73286e+06	1.48369e+06	68.13	0.89	-0.16	0.95913	0.02	0.981433	0.0333224	164.07	541.9	9
M164T568	1.8765e+06	1.64699e+06	58.7	1.89541e+06	2.17424e+06	60.49	0.99	-0.01	0.878477	0.06	0.936588	0.239688	164.07	568.5	9.5
M164T589	1.19917e+06	1.08744e+06	30.01	1.91858e+06	1.73317e+06	34.17	0.63	-0.68	0.0281274	1.55	0.119973	1.40225	164.07	589.5	9.8
M164T631	1.21374e+06	660258	107.15	1.57935e+06	1.25996e+06	91.42	0.77	-0.38	0.505361	0.3	0.709443	0.525608	164.07	630.9	10.5
M164T666	1.60884e+06	1.47891e+06	58.65	789994	748386	45.21	2.04	1.03	0.0206682	1.68	0.0984557	1.28562	164.069	666	11.1
M164T679	4.19539e+06	3.64746e+06	55.36	4.06217e+06	3.50554e+06	49.13	1.03	0.05	0.95913	0.02	0.981433	0.0466651	164.069	679.1	11.3
M164T758	2.11167e+06	2.19308e+06	62.29	1.99006e+06	1.50934e+06	41.91	1.06	0.09	0.798446	0.1	0.895187	0.156846	164.07	758.3	12.6
M164T82	1.59779e+06	1.51315e+06	23	881998	853199	11.74	1.81	0.86	0.0001554	3.81	0.00449411	2.04667	163.839	81.8	1.4
M164T83	1.53117e+06	1.45947e+06	17.32	1.29064e+06	1.38649e+06	24.89	1.19	0.25	0.234499	0.63	0.4544	1.06957	163.991	83.5	1.4
M164T91	1.18769e+07	1.2489e+07	47.1	1.00484e+07	9.61249e+06	33.93	1.18	0.24	0.328205	0.48	0.552488	0.173557	164.039	90.5	1.5
M165T106	184224	193471	15.14	160225	163203	14.08	1.15	0.2	0.160528	0.79	0.36158	1.07379	164.986	106.2	1.8
M165T141	763615	664047	55.7	1.5387e+06	1.36827e+06	30.65	0.5	-1.01	0.00699301	2.16	0.0487438	1.55375	164.836	141.1	2.4
M165T284	2.22664e+07	1.7821e+07	62.65	1.33096e+07	1.13986e+07	55.88	1.67	0.74	0.0281274	1.55	0.119973	1.092	165.076	284.3	4.7
M165T303	2.32049e+07	2.08858e+07	52.96	1.70191e+07	1.53617e+07	37.83	1.36	0.45	0.505361	0.3	0.709443	0.642135	165.076	303.4	5.1
M165T31	71324.4	72619.7	10.02	60792.4	59303.4	24.84	1.17	0.23	0.0379176	1.42	0.147066	1.09373	164.927	31.5	0.5
M165T344	2.11387e+06	2.01034e+06	21.99	1.72992e+06	1.71799e+06	6.71	1.22	0.29	0.014763	1.83	0.078691	1.30564	165.056	343.9	5.7
M165T365	998607	1.04883e+06	40.65	812520	869713	61.25	1.23	0.3	0.505361	0.3	0.709443	0.629266	165.067	364.7	6.1
M165T374	2.44315e+06	2.32793e+06	32.21	1.59595e+06	1.82241e+06	51.68	1.53	0.61	0.0829837	1.08	0.241068	1.16901	165.021	374	6.2
M165T385	1.92235e+06	1.89417e+06	9.38	1.7881e+06	1.83269e+06	11.3	1.08	0.1	0.278632	0.55	0.503994	0.81956	164.836	385.1	6.4
M165T550	495859	400214	53.84	678038	689697	59.92	0.73	-0.45	0.328205	0.48	0.552488	0.316925	164.951	550	9.2
M165T593	245932	248560	25.37	312857	309070	30.75	0.79	-0.35	0.130381	0.88	0.317655	0.989712	165.092	592.9	9.9
M165T602	173175	192066	63.69	51921.3	17407.4	114.24	3.34	1.74	0.0281274	1.55	0.119973	1.33842	165.128	602.3	10
M165T615	371164	374456	31.11	460261	483951	15.67	0.81	-0.31	0.0649573	1.19	0.207149	0.956994	165.092	614.8	10.2
M165T627	271382	204989	60.08	148200	87352.7	144.19	1.83	0.87	0.0104118	1.98	0.0628046	1.34719	165.092	627.3	10.5
M165T654	4.388e+07	4.32793e+07	35.11	4.70957e+07	4.87176e+07	48.04	0.93	-0.1	0.798446	0.1	0.895187	0.056286	164.835	654.5	10.9
M165T679	2.61568e+07	2.34166e+07	64.49	8.51707e+06	7.31035e+06	56.6	3.07	1.62	0.0104118	1.98	0.0628046	1.53035	165.056	678.8	11.3
M165T698	1.96837e+07	1.90515e+07	38.49	4.53074e+06	2.46922e+06	72.62	4.34	2.12	0.0001554	3.81	0.00449411	1.97867	164.836	697.7	11.6
M165T718	8.99299e+06	8.67761e+06	34.6	1.0207e+07	8.97806e+06	64.28	0.88	-0.18	0.95913	0.02	0.981433	0.0644428	164.836	718.1	12
M165T72	2.21111e+07	1.35722e+07	75.44	2.22635e+07	2.33442e+07	42.42	0.99	-0.01	0.878477	0.06	0.936588	0.245585	165.041	72.5	1.2
M165T731	437160	436471	27.9	356358	356250	45.35	1.23	0.29	0.234499	0.63	0.4544	0.721691	165.092	730.8	12.2
M165T749	2.33706e+06	2.55343e+06	28.83	2.37049e+06	2.24965e+06	30.73	0.99	-0.02	0.878477	0.06	0.936588	0.0934051	164.836	748.8	12.5
M165T798	3.73777e+06	3.85375e+06	21.21	3.28309e+06	3.35506e+06	25.02	1.14	0.19	0.278632	0.55	0.503994	0.718824	165.019	798.2	13.3
M165T82_1	1.43614e+07	1.42785e+07	39.73	1.56894e+07	1.44508e+07	45.93	0.92	-0.13	0.95913	0.02	0.981433	0.154755	164.836	81.8	1.4
M165T83	1.10476e+06	1.11247e+06	6.24	1.51071e+06	1.53279e+06	10.63	0.73	-0.45	0.0001554	3.81	0.00449411	1.9853	164.957	83.3	1.4
M165T96	4.2614e+06	2.99022e+06	105.74	1.61116e+07	1.80411e+07	29.04	0.26	-1.92	0.0010878	2.96	0.0151734	1.51988	165.041	95.9	1.6
M166T108	255069	225828	66.21	297160	251689	57.63	0.86	-0.22	0.573737	0.24	0.759252	0.452887	166.023	108	1.8
M166T109	1.31628e+06	1.32198e+06	20.74	2.11352e+06	2.11319e+06	20.83	0.62	-0.68	0.000621601	3.21	0.0104451	1.78434	166.051	109	1.8
M166T114	56956.8	56141.9	49.05	31142.6	24568.3	63.36	1.83	0.87	0.0649573	1.19	0.207149	1.1385	165.964	113.7	1.9
M166T119	591537	553370	43.21	341673	322952	43.07	1.73	0.79	0.0649573	1.19	0.207149	1.36087	166.018	119	2
M166T284	520559	518323	32.18	595042	536476	38.69	0.87	-0.19	0.798446	0.1	0.895187	0.430726	166.076	284.1	4.7
M166T303	500354	466869	23.52	218187	192322	36.14	2.29	1.2	0.000621601	3.21	0.0104451	1.96754	166.076	303.4	5.1
M166T304	188798	173861	20.67	56353.3	58244.3	19.06	3.35	1.74	0.0001554	3.81	0.00449411	2.21804	166.099	304.1	5.1
M166T433	996023	1.08458e+06	49.67	3.12911e+06	3.14426e+06	40	0.32	-1.65	0.0003108	3.51	0.00655521	1.75556	165.986	432.8	7.2
M166T549	171900	192255	40.75	100191	101771	11.65	1.72	0.78	0.104895	0.98	0.278831	1.26475	166.087	549.1	9.2
M166T672	251758	211529	52.61	335783	293144	46.96	0.75	-0.42	0.234499	0.63	0.4544	0.668282	165.979	672.1	11.2
M166T679	3.3377e+06	3.33174e+06	47.04	2.40488e+06	2.38242e+06	24.42	1.39	0.47	0.234499	0.63	0.4544	0.838449	166.059	678.8	11.3
M166T692	1.59838e+06	133700	258.74	137181	143704	49.86	11.65	3.54	0.720901	0.14	0.850988	0.52793	166.016	691.7	11.5
M166T738	3.25965e+06	1.90011e+06	84.78	3.80843e+06	1.5456e+06	134.14	0.86	-0.22	0.234499	0.63	0.4544	0.204779	166.051	738.2	12.3
M166T82	3.53728e+07	3.62275e+07	23.24	2.93925e+07	2.58623e+07	36.09	1.2	0.27	0.194872	0.71	0.408126	0.84116	166.044	81.5	1.4
M166T98	2.68016e+08	2.74725e+08	17.09	1.8943e+08	1.94423e+08	23.98	1.41	0.5	0.004662	2.33	0.0380456	1.58585	166.018	98.3	1.6
M167T108	720366	705069	14.16	671724	640427	17.48	1.07	0.1	0.328205	0.48	0.552488	0.60132	167.046	108.2	1.8
M167T368	29148.7	28156.6	19.67	4062.09	2342.59	113.43	7.18	2.84	0.0001554	3.81	0.00449411	1.95869	166.833	368.5	6.1
M167T380	360595	340849	75.31	529988	394734	80.98	0.68	-0.56	0.441803	0.35	0.659657	0.652932	167.083	380	6.3
M167T521	85654.1	88050.5	24.81	118107	125811	33.36	0.73	-0.46	0.104895	0.98	0.278831	1.01277	167.083	521.5	8.7
M167T588	828938	757293	52.54	828792	569821	80.68	1	0	0.645377	0.19	0.808158	0.185326	166.994	588	9.8
M167T655	216421	194044	61.75	70024	52743.9	101.38	3.09	1.63	0.014763	1.83	0.078691	1.52276	167.144	654.9	10.9
M167T698	1.34232e+06	1.29061e+06	42.23	1.24917e+06	1.19053e+06	32.34	1.07	0.1	0.798446	0.1	0.895187	0.0389703	166.833	698.1	11.6
M167T722	939624	975312	36.04	1.07492e+06	1.19752e+06	50.29	0.87	-0.19	0.441803	0.35	0.659657	0.119185	166.994	721.7	12
M167T765	1.08046e+07	1.01884e+07	38.38	8.5534e+06	8.03458e+06	28.38	1.26	0.34	0.194872	0.71	0.408126	0.727799	166.994	765.4	12.8
M167T82_1	1.5202e+06	1.33452e+06	57.2	1.42702e+06	1.48689e+06	57.76	1.07	0.09	0.95913	0.02	0.981433	0.265897	166.833	81.8	1.4
M167T82_2	3.71678e+06	3.88517e+06	28.87	1.93748e+06	2.21836e+06	44.63	1.92	0.94	0.004662	2.33	0.0380456	1.50427	166.861	82.5	1.4
M167T98	6.81403e+07	8.11819e+07	46.95	5.81848e+07	6.01855e+07	45.74	1.17	0.23	0.573737	0.24	0.759252	0.234842	167.021	98.4	1.6
M168T100_1	650647	661489	12.62	566581	563481	20.67	1.15	0.2	0.234499	0.63	0.4544	1.00895	168.067	99.8	1.7
M168T100_2	4.01165e+06	3.69713e+06	48.69	3.91973e+06	2.92235e+06	63	1.02	0.03	0.645377	0.19	0.808158	0.075264	168.078	100.3	1.7
M168T106	3.29348e+06	3.19377e+06	66.21	2.30027e+06	1.16116e+06	121.32	1.43	0.52	0.328205	0.48	0.552488	0.709779	167.979	106.1	1.8
M168T111	222701	211912	30.3	161149	161640	26.45	1.38	0.47	0.0649573	1.19	0.207149	1.15899	168.053	111.1	1.9
M168T121	1.23946e+06	1.07938e+06	66.9	664366	639738	23.16	1.87	0.9	0.0649573	1.19	0.207149	0.839678	167.979	121.4	2
M168T33	48692	44139.5	30.5	38650	36271.8	18.59	1.26	0.33	0.0649573	1.19	0.207149	1.10026	167.837	32.6	0.5
M168T346	144549	144071	23.82	181240	182392	14.09	0.8	-0.33	0.0379176	1.42	0.147066	1.24208	168.103	345.9	5.8
M168T380	34424.1	616.8	187.97	84111.2	11678.2	215.63	0.41	-1.29	0.0829837	1.08	0.241068	1.02589	168.086	380.1	6.3
M168T443	150007	136966	30.93	126580	134083	33.28	1.19	0.24	0.441803	0.35	0.659657	0.645716	168.103	443.1	7.4
M168T474	736836	806159	33.63	838221	835519	18.09	0.88	-0.19	0.441803	0.35	0.659657	0.591308	168.103	473.7	7.9
M168T624	898107	673051	105.28	156991	174709	59.33	5.72	2.52	0.004662	2.33	0.0380456	1.49889	168.03	624.4	10.4
M168T720	551211	466319	44.67	670646	701210	31.92	0.82	-0.28	0.104895	0.98	0.278831	0.778583	168.139	719.6	12
M168T81	47085113	4.69565e+07	7.99	4.24515e+07	4.23272e+07	2.65	1.11	0.15	0.0018648	2.73	0.0213197	1.6278	168.043	81.1	1.4
M168T82	1.82445e+06	1.51173e+06	39.67	1.83454e+06	1.62213e+06	33.37	0.99	-0.01	0.878477	0.06	0.936588	0.0216196	168.028	82.1	1.4
M168T98	8.77877e+06	8.7064e+06	41.64	9.52252e+06	6.55831e+06	70.84	0.92	-0.12	0.505361	0.3	0.709443	0.00203566	168.014	98.3	1.6
M168T99	6.60174e+06	6.28198e+06	53.13	3.2556e+06	3.3351e+06	27.18	2.03	1.02	0.0206682	1.68	0.0984557	1.356	168.025	98.6	1.6
M169T101_1	319740	300843	21.73	309788	281012	66.79	1.03	0.05	0.95913	0.02	0.981433	0.547803	169.062	100.9	1.7
M169T101_2	179898	187677	54.69	130145	122919	46	1.38	0.47	0.278632	0.55	0.503994	0.493113	169.081	100.6	1.7
M169T104	833112	799358	20.12	757741	715718	14.48	1.1	0.14	0.382284	0.42	0.606076	0.667065	169.008	104.4	1.7
M169T121	1.39008e+06	1.09948e+06	58.13	411373	421004	19.76	3.38	1.76	0.0001554	3.81	0.00449411	1.96002	169.013	121.2	2
M169T227	933102	972214	22.17	1.01896e+06	1.00236e+06	11.93	0.92	-0.13	0.720901	0.14	0.850988	0.620806	168.836	227	3.8
M169T247	552718	471314	40.32	341895	341391	48.25	1.62	0.69	0.0498834	1.3	0.173853	1.06635	168.836	247.2	4.1
M169T315	2.72697e+06	3.07568e+06	44.76	2.84611e+06	2.6101e+06	41.46	0.96	-0.06	1	0	1	0.245449	168.836	315	5.2
M169T344	952488	960378	11.32	921670	945724	11.15	1.03	0.05	0.798446	0.1	0.895187	0.368968	168.836	344.5	5.7
M169T374	296873	222412	72.65	414222	458815	49.92	0.72	-0.48	0.328205	0.48	0.552488	0.688857	169.014	373.7	6.2
M169T472	792764	843567	44.28	624325	738099	52.26	1.27	0.34	0.328205	0.48	0.552488	0.617132	168.99	472.4	7.9
M169T473	70003	62117.1	49.56	44116.6	35169.1	53.92	1.59	0.67	0.160528	0.79	0.36158	0.98126	169.106	473.3	7.9
M169T77	2.13418e+06	2.1403e+06	26.29	3.81617e+06	3.13754e+06	42.12	0.56	-0.84	0.004662	2.33	0.0380456	1.49056	169.014	76.5	1.3
M169T83	816673	673653	112.78	983586	929493	27.42	0.83	-0.27	0.234499	0.63	0.4544	0.946403	168.858	82.5	1.4
M169T91	2.50234e+06	2.58997e+06	26.18	2.16146e+06	2.25566e+06	28.68	1.16	0.21	0.328205	0.48	0.552488	0.590078	169.018	91.1	1.5
M170T111	405266	364310	31.72	140073	143718	38.28	2.89	1.53	0.0001554	3.81	0.00449411	1.80029	170.094	110.5	1.8
M170T159	4.88335e+06	5.18494e+06	39.14	7.2866e+06	6.11642e+06	38.59	0.67	-0.58	0.0649573	1.19	0.207149	1.14108	169.992	158.9	2.6
M170T183	565855	488147	50.72	558365	459467	43.65	1.01	0.02	0.878477	0.06	0.936588	0.12878	170.024	183	3
M170T205	3.75732e+06	3.02513e+06	45.77	4.28991e+06	4.04834e+06	41.71	0.88	-0.19	0.505361	0.3	0.709443	0.370436	169.992	204.8	3.4
M170T31	54772.4	62856.5	34.2	51853.6	57506.7	44.79	1.06	0.08	0.95913	0.02	0.981433	0.296752	169.916	31.5	0.5
M170T32	257191	233043	45.99	344709	319307	40.8	0.75	-0.42	0.194872	0.71	0.408126	0.921093	169.952	31.5	0.5
M170T33	87041.4	85352.5	32.34	83349.7	88087	33.08	1.04	0.06	0.798446	0.1	0.895187	0.119104	169.834	32.6	0.5
M170T363	363486	365699	24.08	113909	115120	35.08	3.19	1.67	0.0001554	3.81	0.00449411	2.07173	170.082	362.5	6
M170T677	147607	169668	47.39	204645	192531	37.13	0.72	-0.47	0.441803	0.35	0.659657	0.881435	170.082	677.2	11.3
M171T100	2.74036e+06	2.62057e+06	20.77	2.55389e+06	2.4944e+06	19.2	1.07	0.1	0.505361	0.3	0.709443	0.395907	171.077	99.6	1.7
M171T112	2.17921e+06	2.14479e+06	9.08	1.60196e+06	1.63751e+06	20.79	1.36	0.44	0.0018648	2.73	0.0213197	1.67227	171.078	112.4	1.9
M171T113	483494	433675	60.11	493721	478303	36.48	0.98	-0.03	0.720901	0.14	0.850988	0.214049	171.041	112.7	1.9
M171T118	153409	136310	41.17	141950	134420	29.3	1.08	0.11	1	0	1	0.0208979	170.994	117.6	2
M171T121_1	1.80342e+07	1.7384e+07	32.94	2.25291e+07	2.17224e+07	24.8	0.8	-0.32	0.160528	0.79	0.36158	0.818638	171.03	121.3	2
M171T121_2	3.90444e+06	3.60498e+06	36.61	7.19514e+06	6.22144e+06	37.39	0.54	-0.88	0.00699301	2.16	0.0487438	1.59987	171.066	121.5	2
M171T125	841277	879358	37.85	673295	477532	68.91	1.25	0.32	0.234499	0.63	0.4544	0.68978	171.008	125.4	2.1
M171T148	1.48544e+06	1.50408e+06	49.19	875506	543154	67.44	1.7	0.76	0.0498834	1.3	0.173853	1.02024	171.008	148.2	2.5
M171T159	202617	201123	50.5	236756	243549	18.93	0.86	-0.22	0.441803	0.35	0.659657	0.674549	170.995	159.3	2.7
M171T214	413116	345449	63.32	195729	134864	73.46	2.11	1.08	0.014763	1.83	0.078691	1.28593	170.871	214.4	3.6
M171T274	1.26393e+06	967444	100.17	449742	417497	59.38	2.81	1.49	0.0829837	1.08	0.241068	1.13202	170.871	274.4	4.6
M171T279	669632	674428	45.28	567290	549133	43.07	1.18	0.24	0.573737	0.24	0.759252	0.265115	170.833	279.4	4.7
M171T303	3.45604e+06	3.1404e+06	20.99	3.13263e+06	3.20636e+06	11.49	1.1	0.14	0.95913	0.02	0.981433	0.688933	171.066	303.4	5.1
M171T345	2.75246e+06	2.59088e+06	36.55	1.58351e+06	1.18282e+06	64.43	1.74	0.8	0.0498834	1.3	0.173853	1.39058	170.833	344.5	5.7
M171T362	1.12431e+06	1.49199e+06	59.74	1.89388e+06	1.78248e+06	54.86	0.59	-0.75	0.130381	0.88	0.317655	0.946486	171.067	362.1	6
M171T368	127899	131565	63.8	116783	136667	56.83	1.1	0.13	0.878477	0.06	0.936588	0.149519	170.871	368.4	6.1
M171T374	1.93694e+06	805137	137.57	3.39751e+06	2.34483e+06	92.81	0.57	-0.81	0.234499	0.63	0.4544	0.823761	171.066	374.1	6.2
M171T375	1.12047e+06	998555	65.3	2.20886e+06	1.6538e+06	69.56	0.51	-0.98	0.0498834	1.3	0.173853	1.15894	171.012	375.4	6.3
M171T383_1	7.87468e+06	9.28204e+06	54.72	5.33731e+06	6.43552e+06	47.28	1.48	0.56	0.160528	0.79	0.36158	0.67125	170.833	383.2	6.4
M171T383_2	928033	771369	54.56	207041	207695	54.88	4.48	2.16	0.0001554	3.81	0.00449411	1.86336	170.871	382.6	6.4
M171T479	585200	616366	23.74	541226	540677	74.25	1.08	0.11	0.382284	0.42	0.606076	0.681959	170.985	478.5	8
M171T484	8.19068e+06	9.82631e+06	67.88	3.96417e+06	1.99765e+06	83.51	2.07	1.05	0.130381	0.88	0.317655	0.872898	171.103	484.4	8.1
M171T493	1.03056e+06	958051	59.9	1.29233e+06	1.30901e+06	32.56	0.8	-0.33	0.328205	0.48	0.552488	0.649613	170.985	493	8.2
M171T508	885060	904298	17.12	856052	872346	11.58	1.03	0.05	0.645377	0.19	0.808158	0.204244	170.986	508.2	8.5
M171T532	205349	204755	37.42	220610	222222	27.96	0.93	-0.1	0.645377	0.19	0.808158	0.355713	171.114	532.4	8.9
M171T565	1.76262e+06	1.91616e+06	30.16	1.49228e+06	1.3465e+06	38.47	1.18	0.24	0.382284	0.42	0.606076	0.6023	171.103	564.8	9.4
M171T69	937846	946870	34.18	779753	759901	16.32	1.2	0.27	0.194872	0.71	0.408126	0.632877	171.03	69.2	1.2
M171T721	2.33978e+06	2.23733e+06	24.03	1.26579e+06	1.06504e+06	62.3	1.85	0.89	0.00699301	2.16	0.0487438	1.58045	171.101	720.6	12
M171T75	3.4256e+06	2.93133e+06	52.61	3.12138e+06	2.67214e+06	41.38	1.1	0.13	0.645377	0.19	0.808158	0.0521565	170.943	75.1	1.3
M171T768	1.32713e+06	1.21127e+06	55.25	1.04758e+06	1.03513e+06	15.44	1.27	0.34	0.573737	0.24	0.759252	0.234073	171.1	768.2	12.8
M171T78	4.37856e+07	3.91187e+07	63.67	7.56385e+07	6.35338e+07	48.54	0.58	-0.79	0.014763	1.83	0.078691	1.23789	171.006	77.7	1.3
M171T82_1	924055	756810	87.76	1.65064e+06	1.70492e+06	21.62	0.56	-0.84	0.130381	0.88	0.317655	1.24218	170.855	82.4	1.4
M171T82_2	3.64374e+06	2.17123e+06	94.78	2.36756e+06	2.55303e+06	54.97	1.54	0.62	0.505361	0.3	0.709443	0.63468	170.902	82.1	1.4
M171T92_1	457414	475761	23.51	494647	444234	72.67	0.92	-0.11	1	0	1	0.459574	171.015	91.6	1.5
M171T92_2	1.77118e+06	1.94066e+06	41.93	1.29366e+06	1.09516e+06	58.12	1.37	0.45	0.234499	0.63	0.4544	0.658704	171.028	91.7	1.5
M172T100	40757.8	39889.8	9.05	37749	37142.9	14.51	1.08	0.11	0.278632	0.55	0.503994	0.715298	172.081	99.8	1.7
M172T101	428814	406798	18.91	299404	337169	36.43	1.43	0.52	0.014763	1.83	0.078691	1.30216	172.018	101.4	1.7
M172T113_1	51918.2	50868	10.96	75239.8	70108.9	26.54	0.69	-0.54	0.0018648	2.73	0.0213197	1.66857	172.007	113.1	1.9
M172T113_2	179524	180547	31.89	207868	125114	89.59	0.86	-0.21	0.328205	0.48	0.552488	0.158266	172.073	113.3	1.9
M172T121_1	1.54769e+06	1.58949e+06	27.35	1.12615e+06	1.12166e+06	31.15	1.37	0.46	0.0649573	1.19	0.207149	1.22276	172.033	121.2	2
M172T121_2	1.27992e+06	1.39469e+06	20.14	1.38558e+06	1.4396e+06	16.33	0.92	-0.11	0.328205	0.48	0.552488	0.513151	172.061	120.5	2
M172T124	515889	512845	12.77	525002	534267	7.7	0.98	-0.03	0.441803	0.35	0.659657	0.193931	172.098	123.5	2.1
M172T183	208512	183123	34.13	163574	176989	29.01	1.27	0.35	0.278632	0.55	0.503994	0.761301	172.021	183	3
M172T240	1.00163e+06	960337	29.23	1.0342e+06	1.03323e+06	5.47	0.97	-0.05	0.441803	0.35	0.659657	0.387386	172.098	239.6	4
M172T303	229590	235826	46.81	217509	229317	19.27	1.06	0.08	0.645377	0.19	0.808158	0.16476	172.07	303.3	5.1
M172T31	1.27668e+06	536193	128.97	2.39062e+06	1.91922e+06	93.13	0.53	-0.9	0.104895	0.98	0.278831	1.10742	171.91	31.5	0.5
M172T346	2.01549e+06	1.9349e+06	35.89	1.90889e+06	1.87171e+06	34.46	1.06	0.08	0.878477	0.06	0.936588	0.248727	172.098	346.2	5.8
M172T407	1.75465e+06	1.2129e+06	81.46	3.24159e+06	3.02607e+06	57.96	0.54	-0.89	0.130381	0.88	0.317655	0.782204	172.098	406.6	6.8
M172T447	770255	768212	26.62	667292	721936	23.33	1.15	0.21	0.328205	0.48	0.552488	0.607621	172.041	447.2	7.5
M172T471	708693	707517	35.46	758891	706042	46.56	0.93	-0.1	1	0	1	0.133163	172.007	470.7	7.8
M172T475_1	93524.4	82530.4	44.72	67008.1	68436	31.01	1.4	0.48	0.234499	0.63	0.4544	0.942195	172.053	475	7.9
M172T484	898950	986547	33.15	718300	719263	55.63	1.25	0.32	0.0829837	1.08	0.241068	0.557969	172.106	484.4	8.1
M172T58	815647	805075	15.73	741807	734387	6.84	1.1	0.14	0.194872	0.71	0.408126	0.873818	171.91	58.1	1
M172T78	1.14402e+06	1.33465e+06	32.27	1.23882e+06	1.25653e+06	9.32	0.92	-0.11	0.798446	0.1	0.895187	0.462477	172.01	77.6	1.3
M172T84	1.22861e+07	1.21215e+07	18.22	1.34351e+07	1.33712e+07	22.34	0.91	-0.13	0.382284	0.42	0.606076	0.31819	172.023	84.3	1.4
M172T94	1.12264e+06	1.0518e+06	86.2	373634	261958	62.68	3	1.59	0.0649573	1.19	0.207149	1.20596	172.026	94.2	1.6
M173T103	3.28822e+06	3.31937e+06	46.98	2.91683e+06	2.80711e+06	52.56	1.13	0.17	0.505361	0.3	0.709443	0.143477	173.093	103.1	1.7
M173T106	1.92662e+06	1.88275e+06	25.87	1.58753e+06	1.65735e+06	23.3	1.21	0.28	0.194872	0.71	0.408126	0.816199	173.057	106	1.8
M173T108_2	1.92714e+06	1.95715e+06	19.26	1.98785e+06	2.04417e+06	49	0.97	-0.04	0.720901	0.14	0.850988	0.316691	173.046	107.8	1.8
M173T227	2.91406e+06	2.509e+06	62.97	2.97104e+06	2.84757e+06	49.41	0.98	-0.03	0.798446	0.1	0.895187	0.125244	172.831	227.3	3.8
M173T276	204278	185931	37.72	280234	268764	34.43	0.73	-0.46	0.0829837	1.08	0.241068	0.96655	172.868	275.7	4.6
M173T31	509120	482738	10.86	491902	495067	13.15	1.04	0.05	0.95913	0.02	0.981433	0.432474	172.918	31.1	0.5
M173T345	1.39419e+06	1.49379e+06	53.2	1.66735e+06	1.5803e+06	41.62	0.84	-0.26	0.382284	0.42	0.606076	0.507581	172.831	344.6	5.7
M173T347	147982	153579	50.98	42117.4	20242.8	96.94	3.51	1.81	0.00699301	2.16	0.0487438	1.45966	173.101	346.7	5.8
M173T35	99472.7	95088	41.87	119357	111294	30.83	0.83	-0.26	0.234499	0.63	0.4544	0.712174	172.958	35.3	0.6
M173T368	23217.9	25952.4	63.96	1413.34	911.54	131.95	16.43	4.04	0.000621601	3.21	0.0104451	1.83318	172.868	368.2	6.1
M173T383_1	1.65765e+06	1.35809e+06	68.66	1.32799e+06	1.26887e+06	44.64	1.25	0.32	0.798446	0.1	0.895187	0.237749	172.831	383.4	6.4
M173T387	6.6272e+06	3.95057e+06	126.89	1.92816e+07	5.05186e+06	183.2	0.34	-1.54	0.160528	0.79	0.36158	0.723202	172.992	387.3	6.5
M173T420	7510.58	5496.32	98.69	107794	111186	59.54	0.07	-3.84	0.0001554	3.81	0.00449411	2.0292	173.072	419.9	7
M173T44	349266	184322	80.78	547432	578104	32.56	0.64	-0.65	0.130381	0.88	0.317655	1.15834	172.868	44.4	0.7
M173T471	35095.1	31838.3	84.79	75498.3	71729.1	45.16	0.46	-1.11	0.0281274	1.55	0.119973	1.32697	173.011	470.8	7.8
M173T503	1.3604e+06	1.10399e+06	48.46	1.16416e+06	1.06283e+06	49.69	1.17	0.22	0.573737	0.24	0.759252	0.41196	173.118	502.9	8.4
M173T508	421985	257523	71.81	378757	428270	43.1	1.11	0.16	0.95913	0.02	0.981433	0.0646799	172.982	508.3	8.5
M173T536	6.86309e+06	7.00153e+06	55.94	2.02773e+06	1.53051e+06	69.23	3.38	1.76	0.0029526	2.53	0.0288032	1.65341	173.118	536.3	8.9
M173T70	8.10481e+06	7.51216e+06	27.26	7.36172e+06	7.61667e+06	20.22	1.1	0.14	0.798446	0.1	0.895187	0.387753	173.009	70.1	1.2
M173T83	1.65147e+06	1.79498e+06	27.47	1.00648e+06	671661	66.78	1.64	0.71	0.0498834	1.3	0.173853	1.38187	172.941	83.4	1.4
M173T84	4.798e+06	4.67084e+06	18.78	3981075	3.826e+06	22.86	1.21	0.27	0.160528	0.79	0.36158	1.03171	173.026	84	1.4
M173T85	3.25269e+07	3.5686e+07	29.32	2.91896e+07	3.23417e+07	43.79	1.11	0.16	0.645377	0.19	0.808158	0.364348	172.986	84.8	1.4
M173T88	1.04364e+08	1.02549e+08	11.79	1.1059e+08	1.09612e+08	6.69	0.94	-0.08	0.194872	0.71	0.408126	0.738814	173.104	88.3	1.5
M174T103	409746	280230	93.18	165065	153478	61.65	2.48	1.31	0.573737	0.24	0.759252	0.745262	174.097	103.2	1.7
M174T104	1.38586e+06	1.0033e+06	104.51	2.14519e+06	1.8259e+06	68.23	0.65	-0.63	0.382284	0.42	0.606076	0.768512	174.041	104.2	1.7
M174T108	906458	632835	67.42	591726	579652	42.51	1.53	0.62	0.505361	0.3	0.709443	0.593478	174.013	107.6	1.8
M174T110	3.74727e+06	3.17642e+06	53.87	1.6766e+06	1.64363e+06	33.94	2.24	1.16	0.0001554	3.81	0.00449411	1.76484	174.077	109.9	1.8
M174T114	77440	73980.4	17.63	105878	84949.8	41.22	0.73	-0.45	0.194872	0.71	0.408126	1.06816	173.987	114.1	1.9
M174T122	2.42327e+06	2.48653e+06	17.56	1.44828e+06	1.34584e+06	22.21	1.67	0.74	0.000621601	3.21	0.0104451	1.86099	174.023	122.4	2
M174T143	47177.2	43516.6	32.78	34909.2	35677.8	28.19	1.35	0.43	0.160528	0.79	0.36158	1.076	174.085	143.5	2.4
M174T152	672478	688816	31.66	770084	741061	10.3	0.87	-0.2	0.130381	0.88	0.317655	0.684229	174.023	152	2.5
M174T174	81518.5	79720.5	43.98	51009.2	47444	58.97	1.6	0.68	0.0829837	1.08	0.241068	0.927619	174.077	173.7	2.9
M174T315	5.80721e+06	5.98956e+06	39.17	2.66278e+06	2.62428e+06	46.8	2.18	1.12	0.00699301	2.16	0.0487438	1.51966	174.023	315	5.2
M174T32_2	167830	172935	43.66	128226	91433.6	72.15	1.31	0.39	0.278632	0.55	0.503994	0.64493	173.945	31.5	0.5
M174T32_3	116101	102314	72.11	85559.8	54386.5	61.63	1.36	0.44	0.798446	0.1	0.895187	0.443142	173.963	31.8	0.5
M174T387	401115	368154	36.68	715148	731065	24.57	0.56	-0.83	0.00699301	2.16	0.0487438	1.64868	173.995	387.3	6.5
M174T453	43718.7	44419.4	31.97	61276.5	50323.4	62.02	0.71	-0.49	0.720901	0.14	0.850988	0.473903	174.122	453.4	7.6
M174T536	331175	369328	70.01	290331	145927	109.67	1.14	0.19	0.720901	0.14	0.850988	0.550762	174.122	536.4	8.9
M174T76	1.96009e+07	2.18475e+07	37.19	1.7759e+07	1.7999e+07	24.43	1.1	0.14	0.505361	0.3	0.709443	0.104192	174.041	75.6	1.3
M174T85_1	1.11709e+06	940001	76.83	2.21856e+06	2.01043e+06	44.65	0.5	-0.99	0.0379176	1.42	0.147066	1.17176	173.989	84.7	1.4
M174T85_2	911652	914244	13.73	1.18278e+06	1.32844e+06	36.29	0.77	-0.38	0.104895	0.98	0.278831	0.645169	174.002	85.5	1.4
M174T88	1.04682e+07	7.28708e+06	91.9	9.34054e+06	1.06793e+07	45.66	1.12	0.16	0.798446	0.1	0.895187	0.15237	174.108	88.3	1.5
M174T93	1.99503e+06	1.60667e+06	74.85	1.84028e+06	1.51045e+06	68.65	1.08	0.12	0.878477	0.06	0.936588	0.010353	174.077	92.8	1.5
M174T95	987411	1.03871e+06	12.19	987523	983930	6.4	1	0	0.798446	0.1	0.895187	0.0756213	174.017	94.7	1.6
M174T96	658766	627643	9.1	623329	640424	9.75	1.06	0.08	0.505361	0.3	0.709443	0.833727	173.963	95.9	1.6
M175T104	2.63721e+07	2.8566e+07	24.29	1.9799e+07	1.92257e+07	34.25	1.33	0.41	0.0498834	1.3	0.173853	1.11584	174.956	104.4	1.7
M175T107_2	780184	877808	23.27	704492	691054	19.8	1.11	0.15	0.382284	0.42	0.606076	0.505615	175.061	107	1.8
M175T126_1	1.45188e+07	1.35349e+07	30.53	1.53644e+07	1.48274e+07	31.74	0.94	-0.08	0.720901	0.14	0.850988	0.162314	174.956	126.1	2.1
M175T179	9.82736e+06	1.00056e+07	46.8	1.61169e+07	1.58918e+07	14.22	0.61	-0.71	0.0029526	2.53	0.0288032	1.38913	174.955	179.1	3
M175T190	236739	267357	33.71	199067	190515	41.86	1.19	0.25	0.441803	0.35	0.659657	0.464405	175.098	190	3.2
M175T227	1.35754e+06	1.33621e+06	15.11	684739	568560	33.66	1.98	0.99	0.0010878	2.96	0.0151734	2.01619	174.829	226.7	3.8
M175T295	1.81777e+06	1.49657e+06	38.06	1.70882e+06	1.81514e+06	28.82	1.06	0.09	1	0	1	0.225265	175.098	294.9	4.9
M175T302	526962	512375	9.45	517076	524825	8.77	1.02	0.03	0.95913	0.02	0.981433	0.235148	175.062	302	5
M175T303	811361	775288	30.08	436457	435503	9.39	1.86	0.89	0.0001554	3.81	0.00449411	1.86874	175.098	302.6	5
M175T314	771015	622169	63.98	1.10508e+06	820829	77.37	0.7	-0.52	0.505361	0.3	0.709443	0.631623	174.829	314.4	5.2
M175T32	35823.5	33630.8	16.75	37986.8	34084.8	29.96	0.94	-0.08	0.720901	0.14	0.850988	0.212111	174.927	31.5	0.5
M175T344	828360	820694	29	436582	441817	24.13	1.9	0.92	0.0010878	2.96	0.0151734	1.85914	174.828	344.4	5.7
M175T362	159788	163232	19.67	185520	197094	16.51	0.86	-0.22	0.160528	0.79	0.36158	0.869343	175.061	362.3	6
M175T368_1	135341	143711	61.45	239395	280913	48.96	0.57	-0.82	0.0649573	1.19	0.207149	0.674251	174.829	368.4	6.1
M175T368_2	2.34981e+06	2.23452e+06	45.86	1.88312e+06	1.82293e+06	36.36	1.25	0.32	0.278632	0.55	0.503994	0.503208	174.957	368	6.1
M175T374	505638	448588	21.9	435190	411235	24.73	1.16	0.22	0.160528	0.79	0.36158	0.798913	175.061	373.9	6.2
M175T375	125354	123931	18.98	38332	27826.8	92.97	3.27	1.71	0.0003108	3.51	0.00655521	1.71395	175.098	374.7	6.2
M175T380	1.81195e+06	1.81394e+06	30.34	1.74764e+06	1.71095e+06	28.58	1.04	0.05	0.878477	0.06	0.936588	0.176157	174.954	380.4	6.3
M175T387	627875	669617	42.24	908531	914675	13.78	0.69	-0.53	0.014763	1.83	0.078691	1.1785	174.988	387.2	6.5
M175T396	471693	473740	30.54	633818	618259	22.29	0.74	-0.43	0.0498834	1.3	0.173853	1.22357	175.098	395.8	6.6
M175T433	258106	213932	67.76	642499	252214	110.89	0.4	-1.32	0.160528	0.79	0.36158	0.946299	175.098	433	7.2
M175T534	251279	265810	20.07	266746	262500	12.91	0.94	-0.09	0.720901	0.14	0.850988	0.438632	175.06	533.5	8.9
M175T56	9.06715e+06	8.75732e+06	10.09	8.21358e+06	8.20651e+06	5.01	1.1	0.14	0.014763	1.83	0.078691	1.29745	174.955	56	0.9
M175T69	525068	666768	54.01	506840	570309	43.68	1.04	0.05	0.645377	0.19	0.808158	0.113291	174.988	69.3	1.2
M175T741	535656	481097	61.3	291044	259992	46.09	1.84	0.88	0.234499	0.63	0.4544	1.09676	175.116	741.4	12.4
M175T76_2	2.96438e+06	3.0617e+06	30.36	309015	63272.2	225.59	9.59	3.26	0.000621601	3.21	0.0104451	2.07166	175.044	75.7	1.3
M175T833	9.78885e+07	9.7762e+07	32.63	5.85357e+07	4.88254e+07	44.63	1.67	0.74	0.0498834	1.3	0.173853	1.27198	174.982	832.8	13.9
M175T85	1.88e+06	1.99709e+06	33.52	2.03371e+06	1.87928e+06	63.96	0.92	-0.11	0.878477	0.06	0.936588	0.175339	174.984	84.8	1.4
M175T88	738434	736252	21.44	563949	515579	24.63	1.31	0.39	0.0498834	1.3	0.173853	1.26072	175.072	88.3	1.5
M176T128	358627	357812	26.31	425362	464784	30.3	0.84	-0.25	0.104895	0.98	0.278831	0.436468	175.942	128.2	2.1
M176T147	843882	760937	73.89	2.05999e+06	2.04456e+06	33.64	0.41	-1.29	0.00699301	2.16	0.0487438	1.51436	176.039	147.3	2.5
M176T303	547195	486040	69.71	113315	78467.4	71.07	4.83	2.27	0.0018648	2.73	0.0213197	1.81112	175.942	302.9	5
M176T315	166205	93732.6	101.63	149402	79619.8	110.78	1.11	0.15	0.878477	0.06	0.936588	0.240578	176.019	315	5.2
M176T35	33118.5	3373.23	140.34	42954.3	5420.84	200.52	0.77	-0.38	0.720901	0.14	0.850988	0.115142	175.942	34.5	0.6
M176T67	126904	123516	46.6	128692	162077	45.22	0.99	-0.02	0.505361	0.3	0.709443	0.0377136	175.942	67.2	1.1
M176T81	1.62008e+07	1.55383e+07	8.11	1.68953e+07	1.66067e+07	9.37	0.96	-0.06	0.328205	0.48	0.552488	0.54309	176.056	81.4	1.4
M176T96	1.59993e+06	1.51786e+06	21.83	1.50524e+06	1.52768e+06	19.02	1.06	0.09	0.645377	0.19	0.808158	0.481034	176.002	96.4	1.6
M177T107	94292.8	104623	46.26	100028	96981.2	35.96	0.94	-0.09	1	0	1	0.309943	177.077	106.9	1.8
M177T111	155905	157436	4.38	151161	157216	12.45	1.03	0.04	1	0	1	0.563387	176.986	111.1	1.9
M177T618	233706	156806	76.14	253626	258369	33.72	0.92	-0.12	0.278632	0.55	0.503994	0.51804	177.092	618.4	10.3
M177T73	558237	360274	77.05	225020	211708	15.24	2.48	1.31	0.0010878	2.96	0.0151734	1.47411	176.926	72.5	1.2
M177T76	5.46419e+06	5.27242e+06	53.75	6.57409e+06	6.32793e+06	31.1	0.83	-0.27	0.573737	0.24	0.759252	0.560764	177.04	76.2	1.3
M177T765	4.66708e+06	3.82765e+06	50.12	7.14653e+06	7.34723e+06	37.58	0.65	-0.61	0.0649573	1.19	0.207149	1.15244	177.092	765.2	12.8
M177T79	1.0181e+09	1.01419e+09	15.69	6.2732e+08	6.30237e+08	18.68	1.62	0.7	0.0003108	3.51	0.00655521	1.93573	176.935	78.7	1.3
M177T809	2.62164e+06	2.63698e+06	31.33	2.09149e+06	2.17567e+06	48.24	1.25	0.33	0.234499	0.63	0.4544	0.841212	177.165	809	13.5
M178T108	1.67992e+08	1.73881e+08	34.95	1.38954e+08	1.25433e+08	27.41	1.21	0.27	0.328205	0.48	0.552488	0.515387	178.018	108.4	1.8
M178T276	133410	135534	51.35	110795	118758	39.19	1.2	0.27	0.573737	0.24	0.759252	0.393346	177.845	276.5	4.6
M178T31	313005	336199	16.27	361965	340935	15.54	0.86	-0.21	0.234499	0.63	0.4544	1.11205	177.903	31.5	0.5
M178T334	3.12418e+06	3.01353e+06	23.53	2.40096e+06	2.99556e+06	49.72	1.3	0.38	0.382284	0.42	0.606076	0.908626	178.051	333.9	5.6
M178T432	66612.6	64091.6	48.92	83062.7	86966.4	21.67	0.8	-0.32	0.505361	0.3	0.709443	0.924841	178.015	431.9	7.2
M178T477	1.02415e+06	962547	46.07	631506	596547	61.96	1.62	0.7	0.0829837	1.08	0.241068	1.10815	178.049	477.2	8
M178T565	93509.6	85984.7	40.7	71941.9	82377.8	60.03	1.3	0.38	0.328205	0.48	0.552488	0.834573	178.124	564.7	9.4
M178T659	205012	198467	40.98	221237	238356	36.03	0.93	-0.11	0.573737	0.24	0.759252	0.260241	178.1	659.3	11
M178T713	146511	108027	97.99	93554	97705.9	31.55	1.57	0.65	0.573737	0.24	0.759252	0.244246	178.168	713.4	11.9
M178T79	2.85609e+06	2.60942e+06	35.03	2.34175e+06	2.41354e+06	28.74	1.22	0.29	0.328205	0.48	0.552488	0.779693	177.94	78.6	1.3
M179T104	378485	410791	41.86	86462.6	55540	71.99	4.38	2.13	0.0003108	3.51	0.00655521	1.96532	178.88	103.7	1.7
M179T108	5.16457e+06	5.6737e+06	24.25	7.65723e+06	7.62662e+06	15.46	0.67	-0.57	0.000621601	3.21	0.0104451	1.64992	179.021	108.3	1.8
M179T260	1.07512e+06	1.04469e+06	32.01	685928	485047	63.72	1.57	0.65	0.104895	0.98	0.278831	1.21873	179.035	259.6	4.3
M179T303	437088	475297	43.12	423401	427462	36.04	1.03	0.05	0.798446	0.1	0.895187	0.0793766	179.046	302.6	5
M179T332	375817	393084	33.35	608095	633245	22.67	0.62	-0.69	0.00699301	2.16	0.0487438	1.45787	179.072	332.3	5.5
M179T445	436964	433641	61.53	378640	331465	36.25	1.15	0.21	0.441803	0.35	0.659657	0.100814	179.108	444.7	7.4
M179T492	327386	200563	119.55	60230.4	67462.3	46.29	5.44	2.44	0.0206682	1.68	0.0984557	1.09942	179.083	491.9	8.2
M179T537	2.89001e+06	1.91759e+06	70.71	3.6896e+06	4.08163e+06	47.17	0.78	-0.35	0.328205	0.48	0.552488	0.683561	178.996	536.9	8.9
M179T737	3.00965e+06	2.89614e+06	19.81	2.40632e+06	2.47556e+06	23.82	1.25	0.32	0.0649573	1.19	0.207149	1.16089	179.071	737.1	12.3
M179T744	2.22323e+06	2.43538e+06	69.47	6.7483e+06	5.93485e+06	52.36	0.33	-1.6	0.00699301	2.16	0.0487438	1.4418	179.18	743.7	12.4
M179T761	7.92019e+06	8.06905e+06	47.13	5.62897e+06	4.49413e+06	57.52	1.41	0.49	0.194872	0.71	0.408126	0.786436	178.978	760.7	12.7
M179T765	387862	233284	132.93	17187.7	16802.3	64.18	22.57	4.5	0.004662	2.33	0.0380456	1.67022	179.108	764.9	12.7
M179T79	1.27366e+07	1.18991e+07	34.91	1.11914e+07	1.15642e+07	17.92	1.14	0.19	0.573737	0.24	0.759252	0.506521	178.94	78.7	1.3
M179T814	8.75641e+06	7.7475e+06	46.17	4.21587e+06	3.97039e+06	28.53	2.08	1.05	0.004662	2.33	0.0380456	1.66542	178.977	814.3	13.6
M179T90	6.28181e+07	6.16861e+07	23.05	5.86032e+07	6.31811e+07	27.54	1.07	0.1	0.798446	0.1	0.895187	0.338142	179.056	90.2	1.5
M180T104	593787	613491	9.87	340378	323003	21.7	1.74	0.8	0.0001554	3.81	0.00449411	2.08865	179.997	104.3	1.7
M180T108	4.74061e+06	4.50537e+06	36.16	6.61478e+06	6.82067e+06	21.88	0.72	-0.48	0.0379176	1.42	0.147066	1.199	180.014	108.3	1.8
M180T122_1	5.11759e+06	4.31183e+06	47.34	2.26125e+06	2.40361e+06	38.74	2.26	1.18	0.0003108	3.51	0.00655521	1.5144	180.034	121.6	2
M180T122_2	1.41058e+08	1.3691e+08	21.04	8.82101e+07	90385886	27.03	1.6	0.68	0.0018648	2.73	0.0213197	1.74978	180.067	121.9	2
M180T303	662566	641901	25.01	701102	665907	24.38	0.95	-0.08	0.573737	0.24	0.759252	0.287891	180.066	303.2	5.1
M180T309	499266	458396	57.85	134969	129631	36.38	3.7	1.89	0.0001554	3.81	0.00449411	1.81736	180.034	309.5	5.2
M180T316	75780.1	66101.4	38.39	78662	64452.3	39.59	0.96	-0.05	0.95913	0.02	0.981433	0.173346	180.016	316	5.3
M180T318	628354	569885	37.24	701921	630323	37.01	0.9	-0.16	0.573737	0.24	0.759252	0.427333	180.034	317.7	5.3
M180T35	93627.2	116216	38.84	55613	42824.8	80.58	1.68	0.75	0.0829837	1.08	0.241068	1.00158	179.842	34.6	0.6
M180T37	156690	160326	11.02	142257	159679	31.65	1.1	0.14	0.645377	0.19	0.808158	0.504983	179.936	36.9	0.6
M180T384	259234	74116.6	129.22	193130	113811	127.56	1.34	0.42	0.798446	0.1	0.895187	0.332952	180.03	384.1	6.4
M180T391	618630	648737	23.5	714787	663274	17.82	0.87	-0.21	0.441803	0.35	0.659657	0.903466	180.066	391.3	6.5
M180T426	35967.5	35322	46.52	44345.4	43527.5	31.13	0.81	-0.3	0.382284	0.42	0.606076	0.62486	180.111	426.3	7.1
M180T444	44015.8	44450.4	18.62	39189	41266.4	20.62	1.12	0.17	0.194872	0.71	0.408126	0.581217	180.111	444.3	7.4
M180T511	221393	184512	62.27	311286	324893	44.18	0.71	-0.49	0.130381	0.88	0.317655	0.862329	180.103	511.3	8.5
M180T57	65426.7	59260.1	26.9	57511.4	58225.9	7.15	1.14	0.19	0.645377	0.19	0.808158	0.668957	179.936	57.2	1
M180T737	337034	301127	58.35	110654	96233.7	79.56	3.05	1.61	0.014763	1.83	0.078691	1.53352	180.075	736.9	12.3
M180T744	403650	366816	41.79	449274	470718	45.96	0.9	-0.15	0.720901	0.14	0.850988	0.180295	180.184	743.9	12.4
M180T91	2.71863e+06	2.96398e+06	21.88	2.83865e+06	2.6678e+06	54.14	0.96	-0.06	0.573737	0.24	0.759252	0.242447	180.059	90.5	1.5
M180T99	7.59168e+07	8.06139e+07	24.13	8.2446e+07	6.60528e+07	73.99	0.92	-0.12	0.441803	0.35	0.659657	0.326349	180.034	98.9	1.6
M181T104	114655	106520	42.01	85188.1	77156.1	35.34	1.35	0.43	0.194872	0.71	0.408126	0.870117	180.879	103.7	1.7
M181T108	287875	274037	15.71	242061	250392	21.04	1.19	0.25	0.160528	0.79	0.36158	1.17831	181.017	108.3	1.8
M181T122_1	6.65036e+06	5.83905e+06	50.29	4.71044e+06	4.68999e+06	36.4	1.41	0.5	0.278632	0.55	0.503994	0.667888	181.05	122.2	2
M181T122_2	1.2396e+07	1.00969e+07	54.81	7.06785e+06	6.27021e+06	50.34	1.75	0.81	0.0498834	1.3	0.173853	1.14677	181.07	122	2
M181T143	415139	437223	24.32	362301	358741	30.54	1.15	0.2	0.441803	0.35	0.659657	0.570545	180.9	142.8	2.4
M181T154	5.75106e+06	5.02651e+06	70.86	1.74554e+06	1.68881e+06	23.77	3.29	1.72	0.0206682	1.68	0.0984557	1.44145	181.05	153.8	2.6
M181T279	258527	242849	46.6	108970	111444	49.11	2.37	1.25	0.00699301	2.16	0.0487438	1.44083	181.037	278.8	4.6
M181T303	212229	188592	37.73	49698.9	28437.3	108.94	4.27	2.09	0.0010878	2.96	0.0151734	1.81829	181.037	302.9	5
M181T363	627392	557956	38.43	1.32841e+06	1.14461e+06	54.41	0.47	-1.08	0.0206682	1.68	0.0984557	1.39618	181.087	363.1	6.1
M181T368	116073	121154	20.98	206745	204533	22.61	0.56	-0.83	0.0003108	3.51	0.00655521	1.82123	180.9	368.1	6.1
M181T40	327056	326239	17.48	238766	228416	34.11	1.37	0.45	0.0649573	1.19	0.207149	1.38475	180.935	39.7	0.7
M181T51	881894	746848	74.74	386069	364434	14.34	2.28	1.19	0.234499	0.63	0.4544	1.17493	180.9	51.2	0.9
M181T545	1.97322e+07	1.79968e+07	50.13	1.48182e+07	1.54997e+07	41.95	1.33	0.41	0.234499	0.63	0.4544	0.630582	180.989	545.4	9.1
M181T709	3.25e+06	3.16266e+06	38.6	4.76181e+06	4.78705e+06	33.45	0.68	-0.55	0.0649573	1.19	0.207149	1.18247	180.989	708.6	11.8
M181T710	395248	379769	29	277980	278554	58.45	1.42	0.51	0.194872	0.71	0.408126	0.997299	181.16	709.7	11.8
M181T75	2.01549e+06	1.83686e+06	20.28	1.68036e+06	1.58236e+06	23.33	1.2	0.26	0.104895	0.98	0.278831	1.00093	180.981	75.5	1.3
M181T84	2.47274e+07	2.55313e+07	46.98	1.86047e+07	1.87489e+07	40	1.33	0.41	0.234499	0.63	0.4544	0.581422	180.973	84.1	1.4
M181T87	1.91615e+06	1.78286e+06	19.77	1.85194e+06	1.85474e+06	8.05	1.03	0.05	0.720901	0.14	0.850988	0.207028	181.029	86.7	1.4
M181T99	4.51324e+06	4.2958e+06	15.72	4.98856e+06	5.14345e+06	12.52	0.9	-0.14	0.194872	0.71	0.408126	0.821166	181.037	98.9	1.6
M182T121	1.6022e+07	1.65848e+07	67.54	2.05999e+07	1.81821e+07	32.68	0.78	-0.36	0.573737	0.24	0.759252	0.818516	181.995	121.3	2
M182T122_1	5.03963e+07	5.09836e+07	30.64	5.16094e+07	4.82619e+07	22.1	0.98	-0.03	0.878477	0.06	0.936588	0.193162	182.013	121.7	2
M182T122_2	1.31488e+06	1.47729e+06	84.53	586222	119160	179.39	2.24	1.17	0.160528	0.79	0.36158	0.915282	182.046	121.6	2
M182T126	1.1269e+06	1.05452e+06	23.12	846514	882833	34.83	1.33	0.41	0.104895	0.98	0.278831	1.14657	182.094	126	2.1
M182T155	1.14195e+06	1.0307e+06	18.56	894833	876875	19.81	1.28	0.35	0.0649573	1.19	0.207149	1.27722	182.046	154.6	2.6
M182T314_1	121602	97324.8	73.73	75215.1	72700.3	48.27	1.62	0.69	0.328205	0.48	0.552488	0.933061	181.514	314.1	5.2
M182T314_2	154649	137240	53.83	85806.3	71678.4	74.66	1.8	0.85	0.130381	0.88	0.317655	0.970502	182.01	313.7	5.2
M182T374	613867	637904	11.2	539321	540797	11.5	1.14	0.19	0.104895	0.98	0.278831	1.19266	182.01	374.2	6.2
M182T393	1.46413e+06	1.39456e+06	61.98	1.62735e+06	1.59964e+06	54.17	0.9	-0.15	0.382284	0.42	0.606076	0.225936	182.046	393.4	6.6
M182T407	210804	205225	84.91	18568.9	15483.4	52.94	11.35	3.5	0.0010878	2.96	0.0151734	1.80477	182.119	407.5	6.8
M182T462	918690	860394	31.9	1.33127e+06	1.41407e+06	39.39	0.69	-0.54	0.0498834	1.3	0.173853	0.917062	182.046	462.4	7.7
M182T477	513163	515005	15.47	373869	395436	24.84	1.37	0.46	0.00699301	2.16	0.0487438	1.47458	182.01	477.4	8
M182T546	642608	687295	24.07	603306	683411	33.72	1.07	0.09	0.95913	0.02	0.981433	0.316785	181.993	545.6	9.1
M182T549	89241.5	86637.4	13.16	78134.6	87519.2	31.52	1.14	0.19	0.798446	0.1	0.895187	0.852446	182.119	549.3	9.2
M182T66	85375	79941.4	65.76	138470	135008	55.28	0.62	-0.7	0.194872	0.71	0.408126	0.7906	182.021	65.7	1.1
M182T81	1.61176e+07	1.36543e+07	37.6	1.34553e+07	1.2872e+07	18.56	1.2	0.26	0.645377	0.19	0.808158	0.683032	182.013	80.6	1.3
M182T84	2.51311e+07	2.52716e+07	6.9	2.24052e+07	2.28846e+07	5.99	1.12	0.17	0.004662	2.33	0.0380456	1.54994	181.966	84.2	1.4
M182T90	643627	647195	20.52	964690	875607	26.4	0.67	-0.58	0.0018648	2.73	0.0213197	1.63419	182.075	89.6	1.5
M182T99_1	3.56385e+06	3.64614e+06	64.2	3.29234e+06	3.12778e+06	49.3	1.08	0.11	0.95913	0.02	0.981433	0.234116	182.029	98.9	1.6
M182T99_2	4.793e+06	5.11943e+06	64.59	4.32063e+06	1.11219e+06	132.2	1.11	0.15	0.441803	0.35	0.659657	0.611936	182.049	98.9	1.6
M183T108	4.82564e+06	4.69254e+06	26.33	4.16859e+06	4.14219e+06	27.51	1.16	0.21	0.234499	0.63	0.4544	0.667164	183.006	107.5	1.8
M183T121	391590	381741	11.24	371586	374532	8.45	1.05	0.08	0.505361	0.3	0.709443	0.6391	182.998	121	2
M183T122	2.68301e+06	2.68293e+06	23.12	2.8727e+06	2.59907e+06	28.28	0.93	-0.1	0.720901	0.14	0.850988	0.362535	183.016	121.7	2
M183T31	162848	160418	26.22	98810.1	99864.9	15.86	1.65	0.72	0.0010878	2.96	0.0151734	1.81143	182.879	30.6	0.5
M183T336	539701	231215	121.88	2.35589e+06	2.6129e+06	38.66	0.23	-2.13	0.0010878	2.96	0.0151734	1.80169	183.049	335.7	5.6
M183T394	173873	114999	69.31	44925.7	35213.5	101.98	3.87	1.95	0.014763	1.83	0.078691	1.47805	183.049	393.6	6.6
M183T465	1.25455e+06	328886	149.02	2.31096e+06	2.03549e+06	55.7	0.54	-0.88	0.0649573	1.19	0.207149	1.36394	183.104	464.7	7.7
M183T474	91469.5	59749.1	100.44	159194	162283	24.27	0.57	-0.8	0.0649573	1.19	0.207149	1.23998	183.139	474.4	7.9
M183T503	2427906	1.77207e+06	106.51	624325	295954	99.23	3.89	1.96	0.0498834	1.3	0.173853	1.18594	183.103	503.4	8.4
M183T548	54703.3	51312.1	48.06	8345.96	6674.67	98.85	6.55	2.71	0.0003108	3.51	0.00655521	1.8989	183.139	547.6	9.1
M183T55_1	252940	260937	59.99	270197	292784	34.43	0.94	-0.1	0.95913	0.02	0.981433	0.318386	182.897	54.9	0.9
M183T55_2	145912	132568	34.4	296250	289532	50.95	0.49	-1.02	0.0206682	1.68	0.0984557	1.14246	182.933	55.2	0.9
M183T576	1.20126e+08	1.2795e+08	35.41	1.58095e+08	1.74707e+08	49.41	0.76	-0.4	0.328205	0.48	0.552488	0.295235	182.988	576	9.6
M183T695	6.89807e+07	4.38634e+07	105.49	2.37558e+07	1.75472e+07	52.06	2.9	1.54	0.278632	0.55	0.503994	0.655821	182.99	694.9	11.6
M183T71	226424	212644	27.62	190433	157871	31.1	1.19	0.25	0.160528	0.79	0.36158	0.711327	182.97	71.5	1.2
M183T735	1.02639e+09	8.23981e+08	50.63	6.19375e+08	6.05086e+08	34.84	1.66	0.73	0.0649573	1.19	0.207149	1.17486	182.988	735.2	12.3
M183T75_1	2.72954e+07	2.53567e+07	62.48	3.50246e+07	3.42615e+07	23.05	0.78	-0.36	0.441803	0.35	0.659657	0.911946	182.51	75.4	1.3
M183T75_2	1.37836e+06	1.3379e+06	59.03	954681	747668	59.63	1.44	0.53	0.441803	0.35	0.659657	0.603067	183.011	75.3	1.3
M183T765	7.76792e+08	8.7013e+08	43.84	7.89958e+08	8.18171e+08	36.31	0.98	-0.02	0.878477	0.06	0.936588	0.0893699	182.989	765.4	12.8
M183T781	1.00519e+09	1.06688e+09	28.43	7.1709e+08	7.2955e+08	26.86	1.4	0.49	0.0498834	1.3	0.173853	1.10626	182.988	781	13
M183T794	1.55362e+06	1.45837e+06	83.75	1.18259e+06	1.03956e+06	84.35	1.31	0.39	0.720901	0.14	0.850988	0.298317	183.139	793.9	13.2
M183T837	3.8714e+08	3.925e+08	36.7	3.1977e+08	2.69964e+08	42.6	1.21	0.28	0.505361	0.3	0.709443	0.572916	182.988	836.9	13.9
M183T99	5.21847e+06	5.28952e+06	21.39	5.1041e+06	4.83988e+06	30.17	1.02	0.03	0.441803	0.35	0.659657	0.160687	183.006	98.8	1.6
M184T104	358390	330403	33.57	359578	387502	34.74	1	0	0.720901	0.14	0.850988	0.0604622	183.848	104.3	1.7
M184T107_1	8.48891e+06	9.38521e+06	40.77	1.02631e+07	9.92629e+06	34.73	0.83	-0.27	0.645377	0.19	0.808158	0.578167	184.061	106.5	1.8
M184T118	4.30217e+07	4.37533e+07	14.1	3.73921e+07	3.59287e+07	11.48	1.15	0.2	0.0649573	1.19	0.207149	1.18469	184.073	118.1	2
M184T121_2	638513	661841	18.68	522979	488004	20.24	1.22	0.29	0.104895	0.98	0.278831	1.14115	184.025	120.9	2
M184T122_1	1.52489e+06	1.34635e+06	82.67	494918	354630	63.27	3.08	1.62	0.0379176	1.42	0.147066	1.19484	184.008	121.6	2
M184T122_2	5.20756e+06	5.31658e+06	41.47	2.57758e+06	2.70148e+06	16.39	2.02	1.01	0.014763	1.83	0.078691	1.67131	184.061	122.2	2
M184T148	714739	627298	65.5	404566	237860	93.6	1.77	0.82	0.130381	0.88	0.317655	0.898012	184.062	148	2.5
M184T336	461889	511679	37.22	267468	230533	71.72	1.73	0.79	0.0649573	1.19	0.207149	1.16806	184.05	335.8	5.6
M184T373	3.99379e+06	3.35549e+06	62.68	8.30558e+06	8.17286e+06	33.22	0.48	-1.06	0.014763	1.83	0.078691	1.48121	184.098	373.1	6.2
M184T374	226787	199511	21	140645	161769	50.68	1.61	0.69	0.0206682	1.68	0.0984557	1.25409	184.007	374.2	6.2
M184T407	80110.1	73775	45.72	40288	38780.2	51.89	1.99	0.99	0.0104118	1.98	0.0628046	1.42615	184.044	407	6.8
M184T463	31325	29878.8	29.2	23801.5	23739.2	11.67	1.32	0.4	0.130381	0.88	0.317655	1.22357	184.008	463	7.7
M184T465	162493	182637	49.96	21493.8	23629.2	29.7	7.56	2.92	0.0001554	3.81	0.00449411	2.07161	184.106	464.9	7.7
M184T69	1.47737e+06	1.53087e+06	21.01	1.49754e+06	1.5189e+06	23.7	0.99	-0.02	0.95913	0.02	0.981433	0.0332898	183.996	69.2	1.2
M184T84	7.9416e+06	6.40722e+06	47.4	6.95323e+06	7.53151e+06	23.23	1.14	0.19	0.798446	0.1	0.895187	0.271977	183.963	84.2	1.4
M185T107_4	282936	291987	10.73	382009	387107	11.5	0.74	-0.43	0.0001554	3.81	0.00449411	1.83511	185.078	107.4	1.8
M185T126	189954	170405	56.8	205908	238576	41.3	0.92	-0.12	1	0	1	0.272328	185.057	125.5	2.1
M185T373	593134	574570	58.61	628751	561837	77.86	0.94	-0.08	1	0	1	0.15938	185.101	373.1	6.2
M185T541	2.65778e+06	2.65926e+06	20.68	1.02568e+06	858457	34.96	2.59	1.37	0.0001554	3.81	0.00449411	2.03681	185.119	541.4	9
M185T562	88607	90286	15.12	88358.2	87647.8	21.56	1	0	1	0	1	0.107265	185.001	562	9.4
M185T597	905141	825926	66.54	1.35527e+06	611548	110.41	0.67	-0.58	0.95913	0.02	0.981433	0.224777	184.984	597	9.9
M185T615	1.89497e+06	1.95766e+06	40.38	1.41083e+06	1.51306e+06	38.03	1.34	0.43	0.130381	0.88	0.317655	0.812711	185.118	614.5	10.2
M185T70_1	962738	796203	49.57	628760	730519	46.36	1.53	0.61	0.278632	0.55	0.503994	0.915913	185.026	69.9	1.2
M185T70_2	636049	431544	88.58	969800	605823	98.37	0.66	-0.61	0.382284	0.42	0.606076	0.498886	185.046	69.6	1.2
M185T72	7.59992e+07	7.42308e+07	5.54	6.45956e+07	6.50493e+07	12	1.18	0.23	0.004662	2.33	0.0380456	1.65644	184.985	72.5	1.2
M185T769	549259	497937	37.25	386216	305597	66.76	1.42	0.51	0.234499	0.63	0.4544	1.06971	184.988	768.6	12.8
M185T784	745591	645520	38.6	698165	695906	34.98	1.07	0.09	0.95913	0.02	0.981433	0.277493	184.984	784.1	13.1
M185T82	3.75066e+06	3.89985e+06	51.98	2.15348e+06	845773	92.26	1.74	0.8	0.234499	0.63	0.4544	1.04727	185.046	81.5	1.4
M185T88	4.3099e+06	3.47933e+06	80.44	7.25971e+06	5.93643e+06	38.8	0.59	-0.75	0.00699301	2.16	0.0487438	1.22315	185.022	87.6	1.5
M185T91	3.12828e+06	3.02286e+06	36.67	2.61913e+06	2.58864e+06	27.31	1.19	0.26	0.382284	0.42	0.606076	0.580481	185.046	90.8	1.5
M185T95	1.44315e+06	1.4352e+06	19.03	964595	973917	17.76	1.5	0.58	0.000621601	3.21	0.0104451	1.70978	185.093	95.4	1.6
M185T97	1.33247e+06	1.15959e+06	70.38	895613	886720	24.35	1.49	0.57	0.328205	0.48	0.552488	0.160592	185.022	96.8	1.6
M185T99	1.3714e+06	1.40076e+06	5.73	1.36832e+06	1.38002e+06	5.1	1	0	0.798446	0.1	0.895187	0.0183731	185.003	98.7	1.6
M186T105	152789	145804	13.58	110208	99545.2	23.72	1.39	0.47	0.014763	1.83	0.078691	1.68695	185.845	105	1.8
M186T110	584550	273306	89.02	757469	699364	60.69	0.77	-0.37	0.441803	0.35	0.659657	0.574971	186.041	109.7	1.8
M186T118	1.17095e+06	1.12564e+06	16.23	982287	1.05535e+06	19.63	1.19	0.25	0.0498834	1.3	0.173853	1.08471	186.077	117.9	2
M186T119	761610	761191	7.86	842482	870411	11.34	0.9	-0.15	0.0829837	1.08	0.241068	1.01721	186.041	119	2
M186T128	29007.7	33536.6	53.57	47484	48398	32.69	0.61	-0.71	0.0281274	1.55	0.119973	1.18474	185.947	127.9	2.1
M186T279	1.10331e+06	1.02856e+06	32.43	930215	954722	40.3	1.19	0.25	0.382284	0.42	0.606076	0.700094	186.113	279.1	4.7
M186T286	166215	157529	33.16	186083	198731	21.57	0.89	-0.16	0.382284	0.42	0.606076	0.516282	185.947	286.2	4.8
M186T303	185193	181948	23.25	289786	265135	38.58	0.64	-0.65	0.0206682	1.68	0.0984557	1.38817	185.947	302.8	5
M186T32	52181.8	50322.7	45.24	58241.5	55479.2	51.39	0.9	-0.16	0.645377	0.19	0.808158	0.169514	185.963	31.8	0.5
M186T348	28247.7	25776.1	30.6	28684.4	28291.8	12.31	0.98	-0.02	0.194872	0.71	0.408126	0.247361	186.023	348.3	5.8
M186T361	1.09708e+07	1.11227e+07	69.47	1.379e+07	9.55029e+06	74.55	0.8	-0.33	0.95913	0.02	0.981433	0.159046	186.114	360.9	6
M186T363	189610	178547	42.24	311269	293237	43.03	0.61	-0.72	0.0498834	1.3	0.173853	1.21011	186.056	363.2	6.1
M186T374_1	157116	121909	101.45	370035	412492	33.38	0.42	-1.24	0.0104118	1.98	0.0628046	1.31391	185.947	373.8	6.2
M186T374_2	1.43322e+06	1.378e+06	27.64	908810	954485	41.12	1.58	0.66	0.0379176	1.42	0.147066	1.39651	186.113	374.4	6.2
M186T463	402669	398515	16.51	480682	466648	12.16	0.84	-0.26	0.0281274	1.55	0.119973	1.3285	186.114	463.1	7.7
M186T547	342547	393187	35.22	161006	144163	59.91	2.13	1.09	0.0104118	1.98	0.0628046	1.28898	186.121	547.3	9.1
M186T615	220576	230678	32.92	160058	160115	21.75	1.38	0.46	0.0281274	1.55	0.119973	0.838923	186.121	614.6	10.2
M186T715	695531	704907	15.1	335882	323961	41.05	2.07	1.05	0.000621601	3.21	0.0104451	1.91667	186.113	714.7	11.9
M186T72	1.32265e+06	1.48214e+06	53.93	1.76582e+06	1.70481e+06	48.51	0.75	-0.42	0.505361	0.3	0.709443	0.639218	185.989	72.4	1.2
M187T102	162523	172876	63.55	212012	203403	50.34	0.77	-0.38	0.328205	0.48	0.552488	0.506806	186.983	101.5	1.7
M187T113	888167	895552	28.44	510606	447544	48.63	1.74	0.8	0.004662	2.33	0.0380456	1.56179	187.025	113.4	1.9
M187T118	1.41657e+06	1.39352e+06	60.18	466058	178074	94.22	3.04	1.6	0.014763	1.83	0.078691	1.41964	187.109	117.6	2
M187T128	95393.5	108821	52.42	136540	133000	55.93	0.7	-0.52	0.328205	0.48	0.552488	0.642468	186.934	128	2.1
M187T148	397139	407436	24.23	294108	258404	34.11	1.35	0.43	0.0829837	1.08	0.241068	1.16703	187.061	147.8	2.5
M187T194	501968	405694	59.64	576520	266292	98.1	0.87	-0.2	0.382284	0.42	0.606076	0.208333	187.109	194.4	3.2
M187T256	1.50715e+07	1.43844e+07	46.08	2.01994e+07	2.07396e+07	19.15	0.75	-0.42	0.0379176	1.42	0.147066	1.00295	187.097	256.3	4.3
M187T303_1	128094	128099	7.35	130341	130922	7.65	0.98	-0.03	0.878477	0.06	0.936588	0.336202	186.934	302.8	5
M187T303_2	533707	426167	69.65	120939	83548.9	59.2	4.41	2.14	0.0010878	2.96	0.0151734	1.71379	187.061	303.1	5.1
M187T35	80735.2	85306.5	12.93	62065.1	64355.9	17.26	1.3	0.38	0.0104118	1.98	0.0628046	1.61006	186.866	34.8	0.6
M187T361	978187	845885	41.6	735363	659250	43.42	1.33	0.41	0.234499	0.63	0.4544	0.811306	187.117	360.7	6
M187T406	58084.7	63425.8	53.44	15404.2	7424.88	105.93	3.77	1.91	0.004662	2.33	0.0380456	1.55777	187.007	406	6.8
M187T472	9.39722e+06	494136	159.36	7.57618e+06	2.2031e+06	208.25	1.24	0.31	0.505361	0.3	0.709443	0.159006	187.007	471.6	7.9
M187T516	966824	951093	14.27	386323	313621	59.13	2.5	1.32	0.000621601	3.21	0.0104451	1.81692	187.134	515.8	8.6
M187T70	1.82014e+06	2.03612e+06	29.07	1.89824e+06	1848059	39.46	0.96	-0.06	0.720901	0.14	0.850988	0.00211195	187.025	70	1.2
M187T84_1	1.00221e+06	1.00585e+06	21.21	1.06806e+06	1.20596e+06	34.37	0.94	-0.09	0.328205	0.48	0.552488	0.066297	186.918	83.6	1.4
M187T84_2	275023	335862	47.63	250463	187182	68.33	1.1	0.13	0.878477	0.06	0.936588	0.38448	187.022	83.8	1.4
M187T92	804066	616613	64.73	817917	809553	16.21	0.98	-0.02	0.720901	0.14	0.850988	0.469245	187.001	91.5	1.5
M187T94	2.83394e+06	2.55699e+06	20.41	2.07566e+06	2.26595e+06	23.45	1.37	0.45	0.004662	2.33	0.0380456	1.43325	187.072	93.9	1.6
M187T96	643324	632332	14.27	672953	692747	15.23	0.96	-0.06	0.720901	0.14	0.850988	0.340074	187.12	96.3	1.6
M187T97	229600	231291	19.74	230834	232275	10.78	0.99	-0.01	1	0	1	0.119646	187.024	97.3	1.6
M188T116	143772	146375	6.65	108902	107302	30.99	1.32	0.4	0.0498834	1.3	0.173853	1.40227	188.039	116.4	1.9
M188T118	108301	116491	18.37	82897.8	84497.6	15.89	1.31	0.39	0.0104118	1.98	0.0628046	1.44178	188.112	117.6	2
M188T126	4.07975e+06	3.71174e+06	34.63	4.18242e+06	4.16189e+06	30.97	0.98	-0.04	0.720901	0.14	0.850988	0.0895233	187.941	126.3	2.1
M188T157	2.53075e+06	2.56639e+06	15.71	810630	855151	42.1	3.12	1.64	0.0001554	3.81	0.00449411	1.96979	187.942	156.6	2.6
M188T257	1.15193e+06	915059	52.7	1.40265e+06	1.31525e+06	24.55	0.82	-0.28	0.160528	0.79	0.36158	0.867011	188.098	257.5	4.3
M188T297	171443	166429	29.81	159732	148487	28.4	1.07	0.1	0.645377	0.19	0.808158	0.282253	188.002	296.8	4.9
M188T301	3.96381e+06	3.71095e+06	27.6	3.94795e+06	3.66449e+06	20.86	1	0.01	1	0	1	0.0287693	188.093	300.6	5
M188T303	6.4624e+06	6.70814e+06	41.74	3.04041e+06	2.71388e+06	60.75	2.13	1.09	0.0104118	1.98	0.0628046	1.46147	187.942	303.1	5.1
M188T31	627842	741658	51.9	766412	763828	28.26	0.82	-0.29	0.573737	0.24	0.759252	0.724172	187.905	31.5	0.5
M188T346	55081.3	56018.3	32	45157.7	37057.8	57.66	1.22	0.29	0.573737	0.24	0.759252	0.798602	188.02	345.5	5.8
M188T352	735073	109146	189.66	1.20046e+06	1.15011e+06	17.08	0.61	-0.71	0.014763	1.83	0.078691	1.45639	188.035	351.8	5.9
M188T368	296417	273450	32.49	311666	278480	38.01	0.95	-0.07	0.798446	0.1	0.895187	0.0764258	187.861	368.4	6.1
M188T37	339468	358903	13.93	323722	318329	12.37	1.05	0.07	0.573737	0.24	0.759252	0.517587	187.861	37	0.6
M188T384	402522	368653	81.83	450685	372594	88.89	0.89	-0.16	0.798446	0.1	0.895187	0.0462677	187.86	384	6.4
M188T393	5.18336e+06	5.49752e+06	28.3	6.16713e+06	6.15565e+06	23.59	0.84	-0.25	0.328205	0.48	0.552488	0.825039	188.039	393.5	6.6
M188T417	1.60638e+06	1.5196e+06	36.33	1.43304e+06	1.48279e+06	14.4	1.12	0.16	0.720901	0.14	0.850988	0.32999	188.039	417.4	7
M188T472	475908	33883.5	160.43	571860	174085	162.32	0.83	-0.26	0.278632	0.55	0.503994	0.431392	188.01	471.6	7.9
M188T539	72895.3	10719.3	148.63	127852	102991	88.36	0.57	-0.81	0.160528	0.79	0.36158	1.05737	188.072	538.9	9
M188T546	252135	266828	23.81	288096	305856	40.61	0.88	-0.19	0.441803	0.35	0.659657	0.127186	188.137	545.7	9.1
M188T55	197967	187093	17.86	151736	152607	18.4	1.3	0.38	0.014763	1.83	0.078691	1.50679	187.861	55	0.9
M188T560	350013	333264	57.95	452146	448869	28.21	0.77	-0.37	0.234499	0.63	0.4544	0.846752	188.112	560.2	9.3
M188T601	5.85435e+06	5.88421e+06	51.68	6.9803e+06	6.70031e+06	48.67	0.84	-0.25	0.328205	0.48	0.552488	0.511478	188.137	601.1	10
M188T658	1.08336e+07	1.09875e+07	35.5	2.10907e+07	1.63788e+07	70.81	0.51	-0.96	0.0829837	1.08	0.241068	1.05449	187.861	657.8	11
M188T683	1.00715e+07	9.1541e+06	59.12	1.44033e+07	1.48166e+07	29.31	0.7	-0.52	0.104895	0.98	0.278831	0.896307	187.861	682.8	11.4
M188T69	4.70236e+06	4.26298e+06	34.33	3.6224e+06	3.91734e+06	44.02	1.3	0.38	0.328205	0.48	0.552488	0.907482	187.941	68.7	1.1
M188T699	2.1615e+06	962741	125.55	1.51304e+07	6.15395e+06	189.25	0.14	-2.81	0.0206682	1.68	0.0984557	1.44559	187.861	698.5	11.6
M188T732	3.37692e+06	3.58305e+06	22.24	2.02136e+06	2.01772e+06	46.45	1.67	0.74	0.00699301	2.16	0.0487438	1.46441	187.942	732	12.2
M188T795	7.40754e+06	6.27617e+06	47.07	4.38599e+06	4.90448e+06	36.14	1.69	0.76	0.0104118	1.98	0.0628046	1.26008	187.942	795.1	13.3
M188T96	4.15809e+06	4.02424e+06	14.31	845675	844460	11.86	4.92	2.3	0.0001554	3.81	0.00449411	2.29251	188.057	96.3	1.6
M189T107	2.42189e+06	2.29399e+06	21.82	2.07329e+06	2.02731e+06	15.07	1.17	0.22	0.130381	0.88	0.317655	0.983679	189.04	107.3	1.8
M189T111	561024	431766	78.04	524122	554728	46.02	1.07	0.1	0.798446	0.1	0.895187	0.0138044	189.096	110.9	1.8
M189T113	509966	458873	50.43	415931	447378	30.76	1.23	0.29	0.441803	0.35	0.659657	0.478491	189.01	113	1.9
M189T121	862316	957347	33.47	1.13176e+06	977737	58.23	0.76	-0.39	0.441803	0.35	0.659657	0.489914	189.077	120.5	2
M189T122	5.80162e+06	5455001	40.45	6.3785e+06	6.40737e+06	19.11	0.91	-0.14	0.328205	0.48	0.552488	0.580011	189.034	121.9	2
M189T127	327291	297608	26.04	289422	274675	16.25	1.13	0.18	0.382284	0.42	0.606076	0.698154	189.057	127.1	2.1
M189T140	460669	505913	54.3	421016	454983	37.98	1.09	0.13	0.720901	0.14	0.850988	0.0151516	188.949	139.6	2.3
M189T257	75679.3	71040	17.56	102261	100862	19.73	0.74	-0.43	0.00699301	2.16	0.0487438	1.47654	189.102	257	4.3
M189T284	746666	804697	83.29	1.50679e+06	1.46255e+06	33.19	0.5	-1.01	0.0281274	1.55	0.119973	1.26153	188.942	284	4.7
M189T286	257869	197689	82.19	153832	86707.6	105.69	1.68	0.75	0.130381	0.88	0.317655	0.865813	189.077	285.7	4.8
M189T301_1	229868	184530	42.93	180840	169151	44.39	1.27	0.35	0.441803	0.35	0.659657	0.712564	189.031	301.3	5
M189T301_2	93647.9	88139.7	21.01	624727	588681	21.38	0.15	-2.74	0.0001554	3.81	0.00449411	2.26393	189.096	300.6	5
M189T303_1	480453	512980	62.88	520149	456679	57	0.92	-0.11	0.95913	0.02	0.981433	0.183879	188.942	303	5
M189T303_2	501969	509134	28.05	414151	372286	48.65	1.21	0.28	0.328205	0.48	0.552488	0.754754	189.077	303.3	5.1
M189T31	62612	65779.2	14.53	67818.1	65700.2	12.39	0.92	-0.12	0.441803	0.35	0.659657	0.648511	188.866	31.5	0.5
M189T359	5.07229e+06	4.54258e+06	56.69	4.19078e+06	3.75944e+06	86.48	1.21	0.28	0.441803	0.35	0.659657	0.663125	188.986	359.4	6
M189T37	466749	447597	24.36	403610	377460	28.45	1.16	0.21	0.278632	0.55	0.503994	0.708981	188.934	37.2	0.6
M189T374_2	426117	416978	20.48	316290	322132	48.25	1.35	0.43	0.194872	0.71	0.408126	1.05622	189.077	374.1	6.2
M189T393	375408	350306	29.81	595991	621350	16.25	0.63	-0.67	0.0029526	2.53	0.0288032	1.72824	189.042	393.4	6.6
M189T417	133968	137458	32.62	116610	111060	20.35	1.15	0.2	0.382284	0.42	0.606076	0.550901	189.042	417.4	7
M189T429	8.07398e+06	7.57342e+06	80.47	32896.4	8689.58	188.2	245.44	7.94	0.0018648	2.73	0.0213197	1.94454	188.952	428.7	7.1
M189T472	205218	227295	64.48	166147	101303	134.73	1.24	0.3	0.194872	0.71	0.408126	0.510917	189.003	471.6	7.9
M189T501	265966	188799	79.57	111749	113853	20.86	2.38	1.25	0.0649573	1.19	0.207149	1.1248	189.113	501.2	8.4
M189T509	62938.4	60218.8	61.13	66250.6	74846.9	38	0.95	-0.07	0.720901	0.14	0.850988	0.214215	189.059	508.9	8.5
M189T546	928846	772376	67.87	2.83385e+06	3.00524e+06	33.68	0.33	-1.61	0.0018648	2.73	0.0213197	1.75217	188.952	545.8	9.1
M189T601	486171	395306	69.36	636481	643563	24.18	0.76	-0.39	0.104895	0.98	0.278831	0.971778	189.139	601.3	10
M189T741	1.24393e+06	1.1478e+06	57.21	1.54394e+06	1.60539e+06	35.68	0.81	-0.31	0.160528	0.79	0.36158	0.542004	188.951	741	12.3
M189T79	2.60505e+06	2.60931e+06	8.2	2.69237e+06	2.69904e+06	7.86	0.97	-0.05	0.505361	0.3	0.709443	0.499402	189.052	79.1	1.3
M189T83	265667	236332	41.67	134462	136731	14.17	1.98	0.98	0.0001554	3.81	0.00449411	1.86102	189.005	83.5	1.4
M189T88	1.12998e+06	1.07215e+06	36.35	724148	604842	54.64	1.56	0.64	0.014763	1.83	0.078691	1.14583	189.088	88.4	1.5
M189T95_1	7.27135e+07	7.15629e+07	14.47	8.86928e+07	9.78893e+07	23.78	0.82	-0.29	0.0829837	1.08	0.241068	0.9615	189.04	94.7	1.6
M189T95_2	2.24155e+06	2.22957e+06	13.25	2.12257e+06	2.18643e+06	13.95	1.06	0.08	0.645377	0.19	0.808158	0.56429	189.088	95.3	1.6
M189T97	996338	1.04216e+06	24.48	1.28332e+06	1.31222e+06	14.41	0.78	-0.37	0.014763	1.83	0.078691	1.17524	189.057	96.6	1.6
M190T106	3.88377e+06	3.91604e+06	53.17	8.5304e+06	6.83713e+06	49.92	0.46	-1.14	0.0206682	1.68	0.0984557	1.38177	190.018	106.1	1.8
M190T114	3.91855e+06	3.97971e+06	12.96	2.02975e+06	1.83648e+06	35.08	1.93	0.95	0.000621601	3.21	0.0104451	1.92618	190.072	114.2	1.9
M190T122	8.24899e+06	8.38014e+06	14.26	6.98159e+06	7.13045e+06	15.15	1.18	0.24	0.0379176	1.42	0.147066	1.1764	190.018	121.7	2
M190T148	1.18611e+06	1.33338e+06	84.7	1.64166e+06	1.40229e+06	36.32	0.72	-0.47	0.441803	0.35	0.659657	0.914313	190.018	148	2.5
M190T205	4.8681e+06	4.6989e+06	66.38	5.37816e+06	4.95536e+06	63.62	0.91	-0.14	0.95913	0.02	0.981433	0.249671	190.055	204.8	3.4
M190T254	6.52669e+06	6.48159e+06	12.95	3.52301e+06	2.75034e+06	57.15	1.85	0.89	0.0104118	1.98	0.0628046	1.6824	190.054	254.3	4.2
M190T300	499595	525663	22.01	484529	504296	28.19	1.03	0.04	0.878477	0.06	0.936588	0.157787	190.051	300.4	5
M190T360	397697	368692	27.28	418967	395312	17.94	0.95	-0.08	0.441803	0.35	0.659657	0.327912	189.99	359.6	6
M190T365	497716	560626	39.15	540852	479568	51.88	0.92	-0.12	1	0	1	0.270434	190.091	364.7	6.1
M190T38_1	118346	93393	71.96	138445	94190.2	66.8	0.85	-0.23	0.645377	0.19	0.808158	0.242927	189.858	37.6	0.6
M190T38_2	167595	174396	20.09	148102	150867	11.56	1.13	0.18	0.194872	0.71	0.408126	0.82263	189.932	37.7	0.6
M190T384	162846	168597	40.4	155774	163382	28.84	1.05	0.06	0.645377	0.19	0.808158	0.049109	189.859	384	6.4
M190T396	122570	157195	50.96	160765	164899	31.1	0.76	-0.39	0.194872	0.71	0.408126	0.725624	190.062	396.4	6.6
M190T429	183851	63556.8	107.55	752946	669822	80.49	0.24	-2.03	0.0281274	1.55	0.119973	1.26422	189.955	428.7	7.1
M190T448	266527	199207	89.79	642887	572405	33.71	0.41	-1.27	0.0104118	1.98	0.0628046	1.47077	190.087	447.6	7.5
M190T478	11248.6	12141	64.71	21110	20462.1	23.65	0.53	-0.91	0.0104118	1.98	0.0628046	1.23077	190.036	478.1	8
M190T51	1.8269e+06	1.60265e+06	63.05	1220250	971032	46.63	1.5	0.58	0.160528	0.79	0.36158	0.355672	189.932	51	0.8
M190T658	7.78559e+06	8.17814e+06	52.14	2.13632e+06	1.38995e+06	77.66	3.64	1.87	0.0018648	2.73	0.0213197	1.6895	189.858	658	11
M190T682	7.22761e+06	4.94226e+06	66.39	2.60147e+06	2.16734e+06	42.78	2.78	1.47	0.0029526	2.53	0.0288032	1.67512	189.858	682.2	11.4
M190T698	1.72643e+06	655264	146.24	1.25958e+07	5.58189e+06	157.2	0.14	-2.87	0.0104118	1.98	0.0628046	1.5792	189.858	698.4	11.6
M190T78	1.3163e+06	1.30116e+06	24.95	1.02956e+06	944648	24.8	1.28	0.35	0.104895	0.98	0.278831	1.0934	190.018	77.9	1.3
M190T82_1	1.35947e+07	1.27896e+07	28.63	1.16026e+07	10705252	27.72	1.17	0.23	0.234499	0.63	0.4544	0.78501	189.988	81.9	1.4
M190T82_2	4.54982e+06	4.68722e+06	19.88	4.10409e+06	4.06835e+06	12.97	1.11	0.15	0.194872	0.71	0.408126	0.703344	190.072	81.8	1.4
M191T108	5.51863e+06	5.29427e+06	10.19	5.03917e+06	4.95388e+06	11.91	1.1	0.13	0.160528	0.79	0.36158	1.07892	191.02	107.7	1.8
M191T115	129720	122018	52.87	65933	65265.7	54.27	1.97	0.98	0.0829837	1.08	0.241068	1.03709	191.093	114.9	1.9
M191T121	772103	799035	12.31	536762	573360	37.15	1.44	0.52	0.0206682	1.68	0.0984557	1.46214	191.02	120.7	2
M191T149	152431	149044	14.57	152852	157658	9.26	1	0	0.645377	0.19	0.808158	0.120657	190.966	148.6	2.5
M191T204	333757	417893	47.07	244800	225217	54.21	1.36	0.45	0.130381	0.88	0.317655	0.66513	191.058	203.6	3.4
M191T255	873448	803337	33.37	519434	526517	19.12	1.68	0.75	0.0104118	1.98	0.0628046	1.62199	191.058	254.8	4.2
M191T303	344975	335445	22.7	406664	395109	21.98	0.85	-0.24	0.194872	0.71	0.408126	0.853753	191.019	303.5	5.1
M191T360	222002	228457	12.12	302307	267378	26.89	0.73	-0.45	0.014763	1.83	0.078691	1.46423	190.982	359.5	6
M191T362	221024	224639	39.84	209958	230348	29.06	1.05	0.07	0.798446	0.1	0.895187	0.0978114	191.02	362.3	6
M191T374	517940	468959	41.05	351933	289764	29.88	1.47	0.56	0.0379176	1.42	0.147066	1.1839	191.02	374.1	6.2
M191T429	2.70967e+06	2.93302e+06	72.08	4.17834e+06	4.11637e+06	20.06	0.65	-0.62	0.234499	0.63	0.4544	0.993664	190.948	428.7	7.1
M191T512	214163	225060	36.52	222447	217531	29.12	0.96	-0.05	0.95913	0.02	0.981433	0.365375	191.071	512.3	8.5
M191T53	1.60297e+07	1.32631e+07	40.48	1.49177e+07	1.52644e+07	11.16	1.07	0.1	0.645377	0.19	0.808158	0.151599	190.928	52.5	0.9
M191T549	118679	135195	50.25	112249	127781	46.52	1.06	0.08	0.720901	0.14	0.850988	0.0900531	191.075	549.4	9.2
M191T70_1	2.01805e+06	2.03651e+06	16.51	1.86681e+06	1.78928e+06	16.14	1.08	0.11	0.328205	0.48	0.552488	0.668386	190.928	70	1.2
M191T718	404651	424791	38.65	727546	498114	121.26	0.56	-0.85	0.573737	0.24	0.759252	0.375206	190.994	718.1	12
M191T725	119699	109546	21.53	153982	150314	24.14	0.78	-0.36	0.0649573	1.19	0.207149	1.05382	191.074	725.2	12.1
M191T766	2.67414e+06	2.67592e+06	44.78	3.83896e+06	3.69509e+06	25.59	0.7	-0.52	0.0498834	1.3	0.173853	1.12316	191.108	765.6	12.8
M191T786	5.83563e+06	4.72199e+06	69.34	2.99746e+06	2.98268e+06	29.68	1.95	0.96	0.0649573	1.19	0.207149	1.06981	191.108	786.3	13.1
M191T79	4.09201e+06	4.14407e+06	9.28	2.28456e+06	1.97092e+06	44.26	1.79	0.84	0.000621601	3.21	0.0104451	1.79628	190.952	78.8	1.3
M191T81_1	2.64245e+07	2.06106e+07	116.47	1.69961e+07	9.0073e+06	137.43	1.55	0.64	0.234499	0.63	0.4544	0.735858	191.02	80.9	1.3
M191T81_2	8.40216e+06	8.18391e+06	8.23	8.07344e+06	8.07755e+06	3.03	1.04	0.06	0.505361	0.3	0.709443	0.764783	191.056	81.3	1.4
M191T89	4.95256e+07	6.02761e+07	54.85	3.31427e+07	3.05629e+07	47.17	1.49	0.58	0.234499	0.63	0.4544	0.601573	191.02	88.6	1.5
M191T95_1	725420	733292	38.59	896376	903766	26.43	0.81	-0.31	0.441803	0.35	0.659657	0.814002	191.045	94.8	1.6
M191T95_2	1.59141e+06	1.58766e+06	84.25	1.13751e+06	1.39529e+06	61.87	1.4	0.48	0.573737	0.24	0.759252	0.247737	191.073	95.4	1.6
M192T106	232719	275193	50.35	190734	193372	51.83	1.22	0.29	0.328205	0.48	0.552488	0.220797	192.014	106.1	1.8
M192T122	9.74327e+06	1.17628e+07	70.9	1.06312e+07	5.91223e+06	104.26	0.92	-0.13	0.878477	0.06	0.936588	0.316384	192.034	121.6	2
M192T204	184207	197340	41.66	216737	221793	16.94	0.85	-0.23	0.573737	0.24	0.759252	0.709476	192.05	203.5	3.4
M192T361	1.50915e+06	857121	101.31	4.1456e+06	4.85983e+06	64.33	0.36	-1.46	0.014763	1.83	0.078691	1.31053	192.066	361.4	6
M192T373	1.0329e+07	1.00453e+07	13.72	8.37005e+06	7.97091e+06	20.1	1.23	0.3	0.0281274	1.55	0.119973	1.42101	192.067	372.5	6.2
M192T429	274444	252450	44.77	278410	245629	59.47	0.99	-0.02	0.95913	0.02	0.981433	0.174895	191.952	429.4	7.2
M192T439	574695	354690	86.75	639699	531118	62.76	0.9	-0.15	0.505361	0.3	0.709443	0.371107	192.066	438.9	7.3
M192T57	831771	675116	45.58	784711	513998	86.84	1.06	0.08	0.0649573	1.19	0.207149	0.52991	191.932	56.5	0.9
M192T70	8.13487e+06	5.41421e+06	82.67	8.77578e+06	4.08572e+06	109.3	0.93	-0.11	0.645377	0.19	0.808158	0.00880484	192.023	70.2	1.2
M192T85	2.87658e+08	2.82543e+08	25.73	2.19856e+08	2.1371e+08	24.93	1.31	0.39	0.0829837	1.08	0.241068	1.1924	191.994	85.1	1.4
M193T108	6.72216e+06	6.79457e+06	4.17	6.64672e+06	6.64412e+06	3.6	1.01	0.02	0.441803	0.35	0.659657	0.419882	193.035	107.5	1.8
M193T121	1.59033e+06	1.59665e+06	45.24	1.28603e+06	1.17096e+06	30.05	1.24	0.31	0.328205	0.48	0.552488	0.344659	193.037	121.3	2
M193T31	138328	143397	27.23	113438	111446	23.75	1.22	0.29	0.130381	0.88	0.317655	0.775182	192.911	31.1	0.5
M193T320	63453.8	60296.6	24.58	62798.1	61775.8	14.78	1.01	0.01	0.95913	0.02	0.981433	0.0889054	192.975	320.1	5.3
M193T361	459132	108321	143.81	518971	229559	164.23	0.88	-0.18	0.573737	0.24	0.759252	0.609511	193.07	361.4	6
M193T372	1.42899e+06	1.43694e+06	29.72	943891	807046	32.37	1.51	0.6	0.014763	1.83	0.078691	1.43415	193.07	372.5	6.2
M193T399	1.40987e+06	1.24148e+06	57.65	1.44914e+06	1.30472e+06	68.8	0.97	-0.04	1	0	1	0.0840846	193.086	399.4	6.7
M193T429	844866	811052	68.6	481488	495971	65.28	1.75	0.81	0.160528	0.79	0.36158	0.902975	192.946	428.8	7.1
M193T522	755720	638119	45.94	795969	801503	33.94	0.95	-0.07	0.798446	0.1	0.895187	0.257355	192.989	522.4	8.7
M193T532	929263	663392	71.27	613615	535849	47.76	1.51	0.6	0.505361	0.3	0.709443	0.701671	193.1	531.6	8.9
M193T55	3.62598e+06	4.00936e+06	37.66	1853244	1.7998e+06	9.45	1.96	0.97	0.0018648	2.73	0.0213197	1.69886	192.929	54.9	0.9
M193T580	320980	251592	68.26	202071	145245	67.93	1.59	0.67	0.104895	0.98	0.278831	0.874312	192.989	580.1	9.7
M193T70	1.22956e+06	1.23925e+06	17.33	1.25632e+06	1.21526e+06	14.42	0.98	-0.03	0.878477	0.06	0.936588	0.156915	193.024	70.3	1.2
M193T723	274451	243184	36.62	511613	474969	17.24	0.54	-0.9	0.000621601	3.21	0.0104451	1.80522	193.124	722.5	12
M193T754	2.8479e+06	1.79276e+06	85.38	728613	604748	64.97	3.91	1.97	0.00699301	2.16	0.0487438	1.60774	193.087	754.3	12.6
M193T791	327604	189122	78.37	1.0292e+06	992304	37.61	0.32	-1.65	0.0010878	2.96	0.0151734	1.7871	193.087	791	13.2
M193T85	9.363e+06	6.98871e+06	60.79	8.38227e+06	6.50644e+06	51.68	1.12	0.16	0.505361	0.3	0.709443	0.0918975	192.998	85.1	1.4
M194T107	454925	444758	25.3	399322	375290	20.97	1.14	0.19	0.382284	0.42	0.606076	0.627904	194.039	107.4	1.8
M194T108	5.63483e+07	5.23837e+07	26.9	4.82469e+07	4.28639e+07	26.28	1.17	0.22	0.104895	0.98	0.278831	0.674498	194.013	107.7	1.8
M194T120	130790737	1.26605e+08	27.27	9.23574e+07	8.97951e+07	33.47	1.42	0.5	0.0379176	1.42	0.147066	1.24175	194.013	120.5	2
M194T122	5.24548e+07	5.32827e+07	16.06	4.44446e+07	4.09827e+07	25.99	1.18	0.24	0.0649573	1.19	0.207149	0.901933	194.049	121.7	2
M194T155	351240	355193	22.62	328535	305106	26.19	1.07	0.1	0.328205	0.48	0.552488	0.410239	194.049	155.2	2.6
M194T193	117258	119254	12.81	113106	104769	22.96	1.04	0.05	0.382284	0.42	0.606076	0.30821	194.05	192.9	3.2
M194T334	166320	96619.3	98.8	255764	194774	86.68	0.65	-0.62	0.234499	0.63	0.4544	0.780265	194.046	334.1	5.6
M194T372	506273	600038	69.27	810284	699417	71.93	0.62	-0.68	0.441803	0.35	0.659657	0.667925	194.082	372.2	6.2
M194T379	547733	601719	70.46	429798	435575	66.65	1.27	0.35	0.505361	0.3	0.709443	0.33929	194.094	379.3	6.3
M194T400	89291	86364.9	20.04	87577.2	84560.8	12.58	1.02	0.03	0.382284	0.42	0.606076	0.0499933	194.09	399.7	6.7
M194T450	367231	384498	50.68	215953	186825	51.74	1.7	0.77	0.160528	0.79	0.36158	0.874539	194.082	450.5	7.5
M194T455	464759	371176	104.31	810507	505732	103.9	0.57	-0.8	0.278632	0.55	0.503994	0.397024	194.046	455	7.6
M194T532	61471.1	52724.1	57.73	33065.7	27831	54.09	1.86	0.89	0.0498834	1.3	0.173853	1.21426	194.103	531.6	8.9
M194T540	151607	141395	90.8	55651.3	47913.9	56.46	2.72	1.45	0.0498834	1.3	0.173853	0.658368	194.118	539.6	9
M194T601	399548	332114	46.48	269246	232819	37.06	1.48	0.57	0.104895	0.98	0.278831	1.04869	193.987	600.6	10
M194T640	422986	431107	23.84	455520	469760	24.75	0.93	-0.11	0.645377	0.19	0.808158	0.406886	194.082	639.9	10.7
M194T806	3.41373e+06	2.74262e+06	88.67	2.99926e+06	3.31533e+06	46.99	1.14	0.19	0.720901	0.14	0.850988	0.00502251	194.082	805.9	13.4
M194T85	1.13788e+07	9.71603e+06	35.24	9.22974e+06	9.12514e+06	23.83	1.23	0.3	0.328205	0.48	0.552488	0.756129	193.991	85.1	1.4
M194T93	2.39895e+07	2.49809e+07	35.67	1.63319e+07	1.59974e+07	63.17	1.47	0.55	0.130381	0.88	0.317655	0.887239	194.103	92.8	1.5
M194T97	5.35908e+06	5.1681e+06	27.21	6.12989e+06	5.65946e+06	23.73	0.87	-0.19	0.014763	1.83	0.078691	0.733259	194.013	97	1.6
M195T108	1.6036e+06	1.72109e+06	54.63	1.71707e+06	1.82414e+06	55.56	0.93	-0.1	1	0	1	0.0235061	195.016	107.7	1.8
M195T120	6.52841e+06	6.78193e+06	12.14	5.45044e+06	5.38455e+06	30.86	1.2	0.26	0.160528	0.79	0.36158	0.838753	195.016	120.2	2
M195T122	3.02482e+06	3.00329e+06	65.24	7.79419e+06	4.76883e+06	108.52	0.39	-1.37	0.234499	0.63	0.4544	0.795638	195.053	121.9	2
M195T303	264593	273227	30.17	248410	246206	12.23	1.07	0.09	0.278632	0.55	0.503994	0.0659705	195.078	303.2	5.1
M195T31	2.35664e+06	2.37339e+06	12.08	2.62379e+06	2.61363e+06	8.26	0.9	-0.15	0.0829837	1.08	0.241068	1.09982	194.905	31.1	0.5
M195T513	193279	150348	82.25	68304.6	58018.2	71.72	2.83	1.5	0.104895	0.98	0.278831	1.2311	195.114	512.9	8.5
M195T528	2.26498e+06	2.03961e+06	97.1	362084	163426	114.19	6.26	2.65	0.014763	1.83	0.078691	1.38834	195.102	527.8	8.8
M195T564	159863	129342	76.07	242795	285300	53.26	0.66	-0.6	0.234499	0.63	0.4544	0.784403	195.139	563.9	9.4
M195T59	369066	371866	7.75	324730	322681	13.97	1.14	0.18	0.0649573	1.19	0.207149	1.32607	194.904	58.6	1
M195T668	231910	185097	62.89	141885	110311	65.14	1.63	0.71	0.194872	0.71	0.408126	0.914214	195.139	667.6	11.1
M195T74	8.18977e+06	7.32914e+06	44.01	6.42225e+06	5.63503e+06	28.06	1.28	0.35	0.441803	0.35	0.659657	0.52983	194.928	73.9	1.2
M195T760_1	2.83282e+06	3.11108e+06	25.19	1.80602e+06	1.80374e+06	44.92	1.57	0.65	0.0206682	1.68	0.0984557	1.30481	194.989	759.5	12.7
M195T760_2	5.39416e+06	5.58335e+06	42.11	2.12255e+06	1.52807e+06	70.77	2.54	1.35	0.0018648	2.73	0.0213197	1.67587	195.139	760	12.7
M195T768	1.62757e+06	1.09025e+06	108.99	2.32262e+06	2.41938e+06	49.13	0.7	-0.51	0.160528	0.79	0.36158	0.849118	194.989	767.9	12.8
M195T775	4.69316e+06	2.92238e+06	89.52	4.98207e+06	4.95186e+06	42.38	0.94	-0.09	0.382284	0.42	0.606076	0.495113	195.139	775.2	12.9
M195T79	8.97663e+08	8.39261e+08	51.69	1.84404e+09	1.72618e+09	25.17	0.49	-1.04	0.0018648	2.73	0.0213197	1.58654	194.946	78.7	1.3
M195T814	1.07552e+07	9.2751e+06	38.02	9.96799e+06	9.86161e+06	22.5	1.08	0.11	0.720901	0.14	0.850988	0.293494	194.989	813.9	13.6
M195T82	8.99733e+07	8.88648e+07	50.59	1.00561e+08	9.64861e+07	32.15	0.89	-0.16	0.798446	0.1	0.895187	0.439158	195.051	81.5	1.4
M195T93	1.69217e+06	1.60644e+06	36.56	1.37589e+06	1.47578e+06	33.24	1.23	0.3	0.382284	0.42	0.606076	0.563619	195.107	92.8	1.5
M195T94	2.35308e+07	2.22102e+07	23.49	2.09065e+07	2.11535e+07	14.23	1.13	0.17	0.505361	0.3	0.709443	0.6033	195.044	94.2	1.6
M196T101	1.28804e+08	1.43657e+08	36.56	9.49193e+07	7.26218e+07	56.64	1.36	0.44	0.234499	0.63	0.4544	0.895601	196.028	101.3	1.7
M196T108	1.74035e+06	1.75836e+06	7.18	1.79674e+06	1.8121e+06	7.55	0.97	-0.05	0.441803	0.35	0.659657	0.467618	196.008	107.7	1.8
M196T122	3.8206e+06	3.37192e+06	54.29	1.55546e+06	1.30031e+06	38.52	2.46	1.3	0.00699301	2.16	0.0487438	1.54818	196.045	121.7	2
M196T137	464859	496482	29	257255	240758	38.26	1.81	0.85	0.0104118	1.98	0.0628046	1.57457	195.811	137.3	2.3
M196T151	903790	897767	22.1	119119	36652.2	177.94	7.59	2.92	0.0001554	3.81	0.00449411	1.97673	196.012	150.6	2.5
M196T191	997259	1.02448e+06	37.85	692772	731316	23.74	1.44	0.53	0.104895	0.98	0.278831	0.956342	196.073	190.8	3.2
M196T282	460994	461706	11.51	366073	342269	24.35	1.26	0.33	0.0104118	1.98	0.0628046	1.49544	196.073	281.6	4.7
M196T31	446074	362699	62.04	372652	377866	11.06	1.2	0.26	0.720901	0.14	0.850988	0.279273	195.905	31.1	0.5
M196T387_1	437380	438128	15.76	264551	312923	41.53	1.65	0.73	0.0010878	2.96	0.0151734	1.43429	196.011	386.6	6.4
M196T387_2	196984	186320	71.15	97175.9	86043.6	60.7	2.03	1.02	0.104895	0.98	0.278831	0.96772	196.098	386.6	6.4
M196T528	147718	151105	42.17	17737.2	12687.9	131.53	8.33	3.06	0.0003108	3.51	0.00655521	1.85612	196.106	527.9	8.8
M196T659	1.24874e+06	564131	125.29	4.51724e+06	2.81408e+06	94.16	0.28	-1.85	0.0379176	1.42	0.147066	1.34464	195.811	659	11
M196T672	1.93984e+06	1.80685e+06	31.36	2.12461e+06	2.33397e+06	34.1	0.91	-0.13	0.798446	0.1	0.895187	0.328426	195.811	671.9	11.2
M196T684	3.25968e+06	3.42061e+06	39.64	2.83453e+06	1.82775e+06	111.32	1.15	0.2	0.130381	0.88	0.317655	0.76381	195.811	684.1	11.4
M196T704	8.53095e+06	8.53341e+06	44.09	1.13383e+07	1.18001e+07	29.16	0.75	-0.41	0.104895	0.98	0.278831	0.919106	195.811	703.5	11.7
M196T721	1.16828e+07	1.10571e+07	37.5	1.05953e+07	1.01466e+07	32.61	1.1	0.14	0.573737	0.24	0.759252	0.291583	195.811	721.2	12
M196T748	1.13188e+07	7.86236e+06	79.54	1.25132e+07	1.15912e+07	47.46	0.9	-0.14	0.382284	0.42	0.606076	0.514027	195.811	748	12.5
M196T75	2.43276e+07	2.44002e+07	7.37	2.29963e+07	2.3398e+07	9.67	1.06	0.08	0.278632	0.55	0.503994	0.891287	195.992	74.9	1.2
M196T760	709750	728768	24.91	203024	183321	38.65	3.5	1.81	0.0001554	3.81	0.00449411	2.0968	196.142	760	12.7
M196T79	6.81905e+06	5.55802e+06	47.41	8.11191e+06	7.72508e+06	47.3	0.84	-0.25	0.441803	0.35	0.659657	0.16791	195.951	78.7	1.3
M196T798	944750	953181	17.74	800754	815256	34.83	1.18	0.24	0.278632	0.55	0.503994	0.89284	195.811	797.7	13.3
M196T89	1.25622e+06	845017	53.71	1.00195e+06	878538	34.65	1.25	0.33	0.798446	0.1	0.895187	0.495814	196.074	89.5	1.5
M196T90	3.39353e+06	2.99905e+06	60.46	2.23164e+06	1.94454e+06	65.73	1.52	0.6	0.278632	0.55	0.503994	0.783217	196.023	90.2	1.5
M196T94	730320	682690	39.06	574706	702730	48.76	1.27	0.35	0.382284	0.42	0.606076	0.779718	196.048	94.2	1.6
M197T101	2.67242e+06	2.52304e+06	22.2	3.84341e+06	4.18301e+06	43.05	0.7	-0.52	0.160528	0.79	0.36158	0.616118	197.032	101.4	1.7
M197T119	228224	232348	42.04	222182	219538	25.39	1.03	0.04	0.798446	0.1	0.895187	0.0952523	197.012	118.6	2
M197T142	208327	202881	22.68	195207	199248	12.36	1.07	0.09	0.878477	0.06	0.936588	0.352622	196.894	142	2.4
M197T285	231028	229614	6.7	215746	212613	9.86	1.07	0.1	0.0649573	1.19	0.207149	0.989215	197.022	285	4.8
M197T31	213063	119031	103.54	277520	267508	24.08	0.77	-0.38	0.0498834	1.3	0.173853	1.08349	196.895	31.1	0.5
M197T525	397269	369514	42.99	481381	518693	30.21	0.83	-0.28	0.278632	0.55	0.503994	0.713967	197.02	525.1	8.8
M197T563	1.09422e+06	968294	31.53	735627	666768	31.68	1.49	0.57	0.014763	1.83	0.078691	1.3671	196.984	562.6	9.4
M197T69	3.75703e+07	3.38767e+07	49.25	2.77582e+07	2.73833e+07	20.6	1.35	0.44	0.441803	0.35	0.659657	0.522362	196.976	69.4	1.2
M197T74	529368	480025	24.53	513837	523373	6.39	1.03	0.04	0.328205	0.48	0.552488	0.0196847	196.923	73.7	1.2
M197T75	491774	440410	26.25	583685	507095	32.22	0.84	-0.25	0.234499	0.63	0.4544	0.847479	196.995	75	1.2
M197T752	1.69668e+06	823309	119.44	1.30609e+06	804942	121.98	1.3	0.38	0.798446	0.1	0.895187	0.170655	197.118	752.1	12.5
M197T79	3.00245e+07	3.17465e+07	33.7	2.44837e+07	2.30709e+07	35.19	1.23	0.29	0.382284	0.42	0.606076	0.738421	196.951	78.7	1.3
M197T82_1	577968	418214	70.19	367956	322540	26.14	1.57	0.65	0.441803	0.35	0.659657	0.696793	197.032	81.7	1.4
M197T836	5.13213e+07	5.41439e+07	38.53	2.77538e+07	2.81046e+07	45.95	1.85	0.89	0.0281274	1.55	0.119973	1.32757	197.155	836	13.9
M197T91	6.63262e+06	5.67442e+06	61.05	5.49841e+06	3.68593e+06	90.02	1.21	0.27	0.0206682	1.68	0.0984557	0.713691	197.067	90.8	1.5
M198T114	1.32059e+06	737555	114.09	829119	649237	86.66	1.59	0.67	0.878477	0.06	0.936588	0.0549654	198.089	113.6	1.9
M198T125	1.21953e+06	1.08357e+06	39.37	313134	329640	44.62	3.89	1.96	0.0001554	3.81	0.00449411	1.86832	198.075	125.2	2.1
M198T214	299374	311279	22.47	229998	221735	17.89	1.3	0.38	0.0281274	1.55	0.119973	1.26062	198.077	214.1	3.6
M198T243	277864	227217	80	420813	389172	24.07	0.66	-0.6	0.0379176	1.42	0.147066	1.11613	198.041	243	4
M198T31	26310.2	10412.6	101.31	59529.5	64008	20.07	0.44	-1.18	0.0379176	1.42	0.147066	1.58802	197.857	30.9	0.5
M198T374	1.85194e+08	1.52184e+08	44.35	2.2845e+08	2.27347e+08	56.16	0.81	-0.3	0.720901	0.14	0.850988	0.198985	198.033	374.1	6.2
M198T385	320312	315439	15.02	364872	331482	40.58	0.88	-0.19	0.720901	0.14	0.850988	0.259747	197.808	384.9	6.4
M198T459	199640	222584	54.94	303388	365796	64.43	0.66	-0.6	0.328205	0.48	0.552488	0.330168	198.04	458.8	7.6
M198T475	129171	157432	58.07	86759.5	64110	67.67	1.49	0.57	0.645377	0.19	0.808158	0.571951	198.114	475.2	7.9
M198T487	206403	118493	93.5	262605	197841	45.82	0.79	-0.35	0.160528	0.79	0.36158	0.868497	198.114	486.8	8.1
M198T540	285320	239885	57.27	354271	359406	49.36	0.81	-0.31	0.645377	0.19	0.808158	0.468593	198.056	540	9
M198T658	2.87069e+06	3.69938e+06	74.32	3.70024e+06	1.85149e+06	115.74	0.78	-0.37	0.878477	0.06	0.936588	0.390053	197.808	658.3	11
M198T684	4.61531e+06	4.15614e+06	56.27	543591	464274	88.37	8.49	3.09	0.0001554	3.81	0.00449411	1.83615	197.808	684.3	11.4
M198T69	2.15562e+06	2.12314e+06	69.78	2.95733e+06	2.83872e+06	26.6	0.73	-0.46	0.130381	0.88	0.317655	1.01128	197.979	69.4	1.2
M198T704	1.40093e+07	1.32049e+07	57.02	2.28e+06	2.46604e+06	23.29	6.14	2.62	0.0001554	3.81	0.00449411	2.06747	197.808	703.8	11.7
M198T722	1.72143e+07	1.7938e+07	15.2	1.81462e+07	1.92605e+07	54.71	0.95	-0.08	0.798446	0.1	0.895187	0.158355	197.808	721.7	12
M198T75	872609	804312	34	1.12371e+06	1.04806e+06	17.42	0.78	-0.36	0.160528	0.79	0.36158	1.15546	197.515	74.5	1.2
M198T798	2.51999e+06	2.14191e+06	56.88	2.7994e+06	2.552e+06	47.87	0.9	-0.15	0.645377	0.19	0.808158	0.286636	197.808	797.6	13.3
M198T82_1	741300	396288	133.52	1.79199e+07	2.01832e+07	61.7	0.04	-4.6	0.0029526	2.53	0.0288032	1.72168	197.808	81.7	1.4
M198T836	4.5593e+06	4.93342e+06	37.6	2.10984e+06	1.88091e+06	65.78	2.16	1.11	0.014763	1.83	0.078691	1.48562	198.158	836.2	13.9
M198T84	6.25636e+06	5.98389e+06	67.46	3.5846e+06	3.66053e+06	66.37	1.75	0.8	0.278632	0.55	0.503994	0.752274	197.94	84.3	1.4
M198T90	542602	565563	44.97	287373	326959	52.52	1.89	0.92	0.0379176	1.42	0.147066	1.23515	198.071	90	1.5
M198T94_1	3.23389e+06	3.56994e+06	30.47	3.59039e+06	3.63919e+06	39.11	0.9	-0.15	0.798446	0.1	0.895187	0.23136	198.037	94.3	1.6
M198T94_2	1.05254e+07	1.06517e+07	9.63	8.40758e+06	8.46229e+06	29.43	1.25	0.32	0.104895	0.98	0.278831	1.28986	198.049	94.3	1.6
M199T100	3.24323e+06	2.9712e+06	31.36	2.724e+06	2.48551e+06	33.15	1.19	0.25	0.194872	0.71	0.408126	0.676645	199.072	99.8	1.7
M199T102	3.67859e+06	3.72033e+06	46.05	5.124e+06	4.42979e+06	56.06	0.72	-0.48	0.328205	0.48	0.552488	0.784916	199.037	101.7	1.7
M199T108	234362	248511	56.85	180288	176569	42.59	1.3	0.38	0.278632	0.55	0.503994	0.215953	199.109	108.2	1.8
M199T111	935925	877091	39.22	805089	637975	62.3	1.16	0.22	0.505361	0.3	0.709443	0.63126	199.073	111.5	1.9
M199T119	287941	293536	25.52	269504	259898	23.87	1.07	0.1	0.573737	0.24	0.759252	0.298955	199.024	119	2
M199T142	43281.1	45559.1	31.09	48510	46420.8	32.48	0.89	-0.16	0.720901	0.14	0.850988	0.283055	199.002	141.5	2.4
M199T303	129459	131838	25.83	32271.1	27282.6	46.95	4.01	2	0.0001554	3.81	0.00449411	2.0623	199.024	303.4	5.1
M199T310	120715	130050	29.87	97493.3	98763.8	19.49	1.24	0.31	0.104895	0.98	0.278831	0.632001	199.007	310	5.2
M199T374	1.66219e+07	1.83252e+07	46.5	1.80111e+07	1.97123e+07	57.09	0.92	-0.12	0.798446	0.1	0.895187	0.076767	199.036	374.1	6.2
M199T517	38659.7	40183.9	20.48	38612.4	43896.6	44.02	1	0	0.798446	0.1	0.895187	0.202483	199.007	517.1	8.6
M199T539	1.99853e+06	2.13865e+06	26.42	1.90308e+06	1.82321e+06	42.83	1.05	0.07	0.798446	0.1	0.895187	0.333916	199.134	539.2	9
M199T572	887189	1.18796e+06	67.76	1.03832e+06	1.09615e+06	37.12	0.85	-0.23	0.645377	0.19	0.808158	0.655511	199.097	572.4	9.5
M199T641	2.365e+06	2.47694e+06	18.83	2.46267e+06	2.52772e+06	15.11	0.96	-0.06	0.720901	0.14	0.850988	0.235606	199.134	640.9	10.7
M199T69_1	4.01126e+06	3.18713e+06	76.58	1.23641e+06	724705	96.9	3.24	1.7	0.014763	1.83	0.078691	1.54453	198.972	69.4	1.2
M199T69_2	8.45013e+06	8.32592e+06	3.76	8.08383e+06	8.09294e+06	2.82	1.05	0.06	0.0104118	1.98	0.0628046	1.37303	199.001	69.1	1.2
M199T743	2.43018e+06	1.89251e+06	53.78	2.62918e+06	2.56652e+06	29.21	0.92	-0.11	0.645377	0.19	0.808158	0.44946	199.017	742.9	12.4
M199T754	280621	259127	50.52	199940	184265	66.98	1.4	0.49	0.234499	0.63	0.4544	0.938822	199.17	754.2	12.6
M199T76	5.49415e+06	4.46558e+06	84.42	8.31815e+06	8.20719e+06	9.05	0.66	-0.6	0.0829837	1.08	0.241068	1.19994	199.001	76.4	1.3
M199T84	7.35281e+06	6.8089e+06	28.91	7.83537e+06	7.73982e+06	37.32	0.94	-0.09	0.573737	0.24	0.759252	0.0657989	199.033	84.4	1.4
M200T100	823807	720394	38.72	873687	707725	47.26	0.94	-0.08	0.878477	0.06	0.936588	0.23279	200.068	99.6	1.7
M200T104	57579.1	59596.2	33.3	64668.2	40549.1	89.16	0.89	-0.17	0.441803	0.35	0.659657	0.356707	200.093	104	1.7
M200T108	328777	295834	42.22	943429	915108	34.81	0.35	-1.52	0.000621601	3.21	0.0104451	1.8671	200.033	107.6	1.8
M200T122	3.87974e+06	3.93358e+06	36.36	2.75199e+06	2.65869e+06	29.05	1.41	0.5	0.104895	0.98	0.278831	1.08462	200.056	122.2	2
M200T140	143774	154962	19.2	89260	92051.1	29.69	1.61	0.69	0.004662	2.33	0.0380456	1.68293	199.805	139.6	2.3
M200T167	1.46083e+06	1.37488e+06	32.56	1.68484e+06	1.07495e+06	88.55	0.87	-0.21	0.382284	0.42	0.606076	0.198756	200.056	166.9	2.8
M200T31	388684	421254	22.52	571168	565723	9.96	0.68	-0.56	0.0001554	3.81	0.00449411	1.74003	199.85	31	0.5
M200T336	112856	114942	43.24	51389.1	40802.9	74.76	2.2	1.13	0.0104118	1.98	0.0628046	1.36498	200.129	335.7	5.6
M200T361	391470	349935	36.86	385012	379298	18.33	1.02	0.02	0.878477	0.06	0.936588	0.0846249	200.093	361.3	6
M200T374_1	9.24123e+07	7.93399e+07	90.4	8.43334e+07	7.53888e+07	99.77	1.1	0.13	0.798446	0.1	0.895187	0.102602	200.03	374.1	6.2
M200T408	2.84835e+06	3.03066e+06	16.49	2.36217e+06	2.37918e+06	29.91	1.21	0.27	0.160528	0.79	0.36158	0.823364	200.093	408.4	6.8
M200T426	256176	245362	56.66	187252	186966	36.27	1.37	0.45	0.441803	0.35	0.659657	0.677349	200.129	426.1	7.1
M200T535	405428	446686	28.19	189712	183984	31.55	2.14	1.1	0.0018648	2.73	0.0213197	1.74156	200.13	535.2	8.9
M200T572	192903	190142	53.49	116930	97680.5	83.83	1.65	0.72	0.0829837	1.08	0.241068	1.04534	200.101	572.4	9.5
M200T684	1.56626e+06	1.60821e+06	39.83	1.2761e+06	1.4778e+06	55.24	1.23	0.3	0.505361	0.3	0.709443	0.561193	199.805	684.2	11.4
M200T70	274914	266363	14.56	407172	402115	19.06	0.68	-0.57	0.000621601	3.21	0.0104451	1.78674	200.004	69.6	1.2
M200T722	9.51316e+06	9.71922e+06	23.18	1.14324e+07	9.25458e+06	84.23	0.83	-0.27	0.95913	0.02	0.981433	0.0163088	199.805	721.7	12
M200T748	4.25455e+06	4.73158e+06	62.87	1.20736e+07	1.08327e+07	83.43	0.35	-1.5	0.0281274	1.55	0.119973	0.839435	199.805	748.1	12.5
M200T798	129780	147443	28.68	143427	132180	31.99	0.9	-0.14	0.878477	0.06	0.936588	0.440872	199.805	797.7	13.3
M200T82	3.55063e+06	3.15375e+06	60.92	4.78829e+06	4.97296e+06	20.05	0.74	-0.43	0.194872	0.71	0.408126	1.0542	199.804	81.7	1.4
M200T84	2.57398e+06	2.77558e+06	37.77	4.17835e+06	3.9927e+06	32.04	0.62	-0.7	0.014763	1.83	0.078691	1.22503	199.937	84.3	1.4
M200T85	6.56939e+06	6.69053e+06	12.33	6.8605e+06	6.70533e+06	12.41	0.96	-0.06	0.878477	0.06	0.936588	0.450315	200.054	85.2	1.4
M201T104_1	148195	145689	43.46	113068	108600	38.62	1.31	0.39	0.278632	0.55	0.503994	0.684109	201.077	104.2	1.7
M201T107	469700	293159	66.59	989848	1.01235e+06	14.44	0.47	-1.08	0.0029526	2.53	0.0288032	1.6614	201.052	107.4	1.8
M201T109	2.10296e+07	1.76203e+07	73.83	1.99649e+07	1.34711e+07	77.93	1.05	0.07	0.95913	0.02	0.981433	0.127087	201.135	109.3	1.8
M201T126	248265	232296	49.51	312516	344328	56.46	0.79	-0.33	0.645377	0.19	0.808158	0.138009	201.124	126	2.1
M201T157	1.86588e+06	1.89465e+06	14.61	814164	1.03636e+06	69.32	2.29	1.2	0.000621601	3.21	0.0104451	1.46185	201.034	157.4	2.6
M201T223	212241	176882	47.61	226680	193748	51.23	0.94	-0.09	0.573737	0.24	0.759252	0.160114	201.034	223.2	3.7
M201T303	175397	182404	17.83	195906	194592	6.18	0.9	-0.16	0.104895	0.98	0.278831	0.884061	201.077	303.4	5.1
M201T31_2	62999.2	66138.4	18.22	48562.3	47957.9	21.66	1.3	0.38	0.0206682	1.68	0.0984557	1.3261	200.914	31.1	0.5
M201T31_3	6221.94	6793.44	29.49	8454.54	7876.9	30.84	0.74	-0.44	0.130381	0.88	0.317655	0.955578	200.965	31.4	0.5
M201T369	1.69798e+06	1.59039e+06	35.95	1.98808e+06	1.91309e+06	30.06	0.85	-0.23	0.382284	0.42	0.606076	0.610802	201.113	368.6	6.1
M201T374	1.03315e+07	1.02982e+07	12.08	1.01983e+07	1.00262e+07	13.26	1.01	0.02	0.95913	0.02	0.981433	0.0814734	201.033	374	6.2
M201T408	210809	207053	34.7	105659	112944	28.62	2	1	0.0029526	2.53	0.0288032	1.58235	201.096	408.5	6.8
M201T538	1.16258e+06	1.19258e+06	28	414028	410057	33.13	2.81	1.49	0.0003108	3.51	0.00655521	1.98867	201.023	537.9	9
M201T546	562726	522109	35.79	1.1458e+06	927267	57.11	0.49	-1.03	0.0104118	1.98	0.0628046	1.45019	201.113	545.9	9.1
M201T580	1.03769e+06	1.09315e+06	21.28	686710	780120	36.05	1.51	0.6	0.00699301	2.16	0.0487438	1.31814	201.15	579.8	9.7
M201T662	3.75595e+06	3.65854e+06	38.84	1.96421e+06	2.2379e+06	75.56	1.91	0.94	0.0649573	1.19	0.207149	1.24249	201.15	662.3	11
M201T743	647165	615922	11.7	641179	616203	19.1	1.01	0.01	0.798446	0.1	0.895187	0.122164	201.014	742.9	12.4
M201T759	435259	382203	40.97	611542	572346	55.04	0.71	-0.49	0.505361	0.3	0.709443	0.699087	201.113	759.5	12.7
M201T85	2.3586e+08	2.9467e+08	63.69	4.49527e+08	4.17833e+08	24.69	0.52	-0.93	0.00699301	2.16	0.0487438	1.38004	201.037	85.2	1.4
M201T92	2.27475e+06	2.42301e+06	29.76	2.49075e+06	2.45582e+06	9.09	0.91	-0.13	0.878477	0.06	0.936588	0.595221	201.057	91.6	1.5
M201T95	713036	745190	37.8	599505	670312	26.82	1.19	0.25	0.278632	0.55	0.503994	0.401645	201.125	95.1	1.6
M202T101	714783	520687	90.2	889038	838047	27.68	0.8	-0.31	0.278632	0.55	0.503994	0.856126	202.083	100.6	1.7
M202T109	953007	930465	26.91	765837	598526	63.65	1.24	0.32	0.0498834	1.3	0.173853	0.909868	202.139	109.3	1.8
M202T110	2.78407e+06	3.37431e+06	66.32	3.1535e+06	3.41339e+06	70.7	0.88	-0.18	0.878477	0.06	0.936588	0.131712	202.072	109.8	1.8
M202T122_1	1.43047e+07	1.60099e+07	43.14	2.18107e+07	2.09958e+07	24.89	0.66	-0.61	0.0281274	1.55	0.119973	1.17689	202.018	121.9	2
M202T122_2	2.61838e+06	2.95015e+06	47.04	5.87196e+06	6.05413e+06	20.1	0.45	-1.17	0.0003108	3.51	0.00655521	1.44675	202.108	121.9	2
M202T150	3.05054e+06	2.98144e+06	12.23	2.78097e+06	2.64761e+06	17.46	1.1	0.13	0.234499	0.63	0.4544	0.761536	202.108	149.7	2.5
M202T151	2.7594e+06	2.72217e+06	13.67	2.67773e+06	2.7518e+06	6.71	1.03	0.04	0.645377	0.19	0.808158	0.248337	202.018	150.7	2.5
M202T304	1.68837e+06	1.67632e+06	56.84	1.32641e+06	622014	96.58	1.27	0.35	0.160528	0.79	0.36158	0.737831	202.054	303.8	5.1
M202T31_1	60054.7	58469	31.92	54905.7	42798.8	44.59	1.09	0.13	0.505361	0.3	0.709443	0.425861	201.859	30.8	0.5
M202T319	266638	246087	36.73	222763	195815	40.54	1.2	0.26	0.328205	0.48	0.552488	0.62209	202.054	319.1	5.3
M202T344	1.05076e+08	8.70957e+07	73.44	2.27019e+08	2.41544e+08	32.08	0.46	-1.11	0.00699301	2.16	0.0487438	1.51971	202.018	344.4	5.7
M202T364	1.27094e+06	1.2757e+06	21.92	1.03786e+06	924883	25.13	1.22	0.29	0.0829837	1.08	0.241068	1.00249	202.108	363.5	6.1
M202T374	490179	478905	22.41	412578	430415	23.16	1.19	0.25	0.234499	0.63	0.4544	0.918788	202.035	374.1	6.2
M202T381	20967.1	19487.1	51.59	25294.7	26854.3	29.2	0.83	-0.27	0.441803	0.35	0.659657	0.68245	202.062	381.1	6.4
M202T409	231682	231319	67.01	276471	267949	25.9	0.84	-0.25	0.573737	0.24	0.759252	0.739081	202.117	409.2	6.8
M202T444	1.89672e+06	2.07091e+06	24.65	2.14587e+06	2.17395e+06	23.2	0.88	-0.18	0.573737	0.24	0.759252	0.543599	202.054	444.1	7.4
M202T464	1.09942e+06	1.12222e+06	27.81	984683	1.02335e+06	20.45	1.12	0.16	0.382284	0.42	0.606076	0.549851	202.055	463.9	7.7
M202T537	567872	617343	24.83	503606	455400	37.53	1.13	0.17	0.645377	0.19	0.808158	0.47567	202.01	536.6	8.9
M202T564	76815.5	62810.1	59.89	54232.2	47333	39.16	1.42	0.5	0.328205	0.48	0.552488	0.508175	202.11	563.5	9.4
M202T662	387653	342384	59.95	152928	133181	84.08	2.53	1.34	0.0281274	1.55	0.119973	1.32868	202.153	662.3	11
M202T85	4.22706e+07	4.38275e+07	29.43	2.518e+07	2.43532e+07	38.23	1.68	0.75	0.014763	1.83	0.078691	1.51523	202.041	85.2	1.4
M202T88	2.28429e+06	2.16151e+06	21.7	2.28964e+06	2.27123e+06	21.11	1	0	0.95913	0.02	0.981433	0.0503619	202.013	87.8	1.5
M203T105	1.11632e+06	1.17216e+06	28.73	1.07029e+06	1.16891e+06	28.16	1.04	0.06	0.720901	0.14	0.850988	0.170597	203.093	105	1.8
M203T110	369136	289848	73.26	416925	400503	24.95	0.89	-0.18	0.160528	0.79	0.36158	0.622186	203.075	110.3	1.8
M203T114	77230.4	82083.1	48.26	23920.5	19247.6	45.34	3.23	1.69	0.0018648	2.73	0.0213197	1.80777	203.093	113.8	1.9
M203T122_2	1.39191e+06	1.56715e+06	46.79	1.44506e+06	1.49789e+06	30.52	0.96	-0.05	0.95913	0.02	0.981433	0.265955	203.049	121.7	2
M203T132	5.89892e+06	5.88939e+06	12.61	6.20137e+06	5.98977e+06	15.28	0.95	-0.07	0.720901	0.14	0.850988	0.428619	203.049	132.4	2.2
M203T171	1.28895e+06	1.31159e+06	27.3	1.48085e+06	1.48536e+06	9.82	0.87	-0.2	0.278632	0.55	0.503994	0.888026	203.049	170.9	2.8
M203T303_1	77434.4	76865.5	13.76	77436.6	78003	13.03	1	0	0.878477	0.06	0.936588	0.0211666	203.057	303.5	5.1
M203T31_2	28070.2	26803	33.34	30585.1	32270	31.52	0.92	-0.12	0.441803	0.35	0.659657	0.311042	202.929	31.3	0.5
M203T344	9.82138e+06	9.61962e+06	33.91	5.95854e+06	6.65568e+06	36.48	1.65	0.72	0.0206682	1.68	0.0984557	1.34995	203.021	344.3	5.7
M203T363	1.35683e+08	1.44219e+08	35.98	1.63248e+08	1.84734e+08	30.54	0.83	-0.27	0.234499	0.63	0.4544	0.580426	203.082	362.9	6
M203T372	3.38242e+06	2.34793e+06	94.56	8.01363e+06	8.29768e+06	23.86	0.42	-1.24	0.014763	1.83	0.078691	1.35343	203.111	372.4	6.2
M203T378	1.4261e+06	1.41919e+06	12.71	1.6296e+06	1.61699e+06	18.32	0.88	-0.19	0.130381	0.88	0.317655	0.969313	203.082	377.6	6.3
M203T388	189020	153396	53.19	310897	277830	22.57	0.61	-0.72	0.014763	1.83	0.078691	1.52229	203.129	388.2	6.5
M203T409	8284.01	9523.99	49.86	4256.59	4687.33	32.85	1.95	0.96	0.0498834	1.3	0.173853	1.17929	203.002	408.8	6.8
M203T444	421185	348522	47.08	411806	334473	52.72	1.02	0.03	0.878477	0.06	0.936588	0.0411373	203.057	444.1	7.4
M203T457	76166.2	75745.5	15.71	49952	46248	34.73	1.52	0.61	0.00699301	2.16	0.0487438	1.55907	203.002	456.8	7.6
M203T503	263884	283059	23.48	637804	100604	242.41	0.41	-1.27	0.0104118	1.98	0.0628046	0.697006	203.129	502.8	8.4
M203T546	330785	206604	110.71	239846	124085	123.32	1.38	0.46	0.278632	0.55	0.503994	0.620313	203.129	546.1	9.1
M203T570	419135	413874	18.78	177004	176356	14.07	2.37	1.24	0.0001554	3.81	0.00449411	2.18044	203.129	569.9	9.5
M203T70	890583	882604	14.17	659078	627423	12.98	1.35	0.43	0.0010878	2.96	0.0151734	1.80126	203.02	69.9	1.2
M203T81	5.67533e+06	6.31141e+06	40.24	5.12127e+06	5.59437e+06	52.24	1.11	0.15	0.720901	0.14	0.850988	0.304147	203.067	80.6	1.3
M203T82_1	2.41272e+06	2.30976e+06	14.79	1.66838e+06	1.73243e+06	13.06	1.45	0.53	0.0001554	3.81	0.00449411	1.9735	203.056	82.5	1.4
M203T82_2	748641	718872	28.06	732294	774307	27.44	1.02	0.03	1	0	1	0.14952	203.104	81.8	1.4
M203T85	4.97567e+06	4.28444e+06	33.35	6.32472e+06	5.92189e+06	24.94	0.79	-0.35	0.0649573	1.19	0.207149	1.04564	203.042	85.2	1.4
M203T86	3.83325e+06	4.07768e+06	56.99	4.5034e+06	3.50003e+06	89.74	0.85	-0.23	0.95913	0.02	0.981433	0.199487	203.005	86.4	1.4
M203T87	1.85703e+06	1.99611e+06	24.87	1.88664e+06	1.8567e+06	19.89	0.98	-0.02	0.878477	0.06	0.936588	0.126563	203.02	86.8	1.4
M204T106	1.09508e+06	1.01826e+06	29.3	857976	770801	33.07	1.28	0.35	0.104895	0.98	0.278831	0.991899	204.088	106.4	1.8
M204T122	4.35767e+06	4.15248e+06	20.4	5.27794e+06	6.17429e+06	32.26	0.83	-0.28	0.160528	0.79	0.36158	0.412347	204.034	121.7	2
M204T132	646362	473106	55.15	287082	187530	74.28	2.25	1.17	0.0206682	1.68	0.0984557	1.43376	204.053	132.4	2.2
M204T155	46313.7	42154.1	29.97	26326.2	25551.3	12.09	1.76	0.81	0.0003108	3.51	0.00655521	1.90649	204.07	154.9	2.6
M204T265	1.71706e+06	1.76282e+06	22.75	1.51887e+06	1.49057e+06	13.39	1.13	0.18	0.0829837	1.08	0.241068	0.444998	204.034	265.1	4.4
M204T286	1.63259e+06	1.45474e+06	90.13	296341	385485	66.79	5.51	2.46	0.104895	0.98	0.278831	1.18533	204.033	285.6	4.8
M204T301	425315	331240	62.34	584007	671500	49.65	0.73	-0.46	0.278632	0.55	0.503994	0.667719	204.033	301.4	5
M204T303	233525	230110	16.45	217505	211781	15.19	1.07	0.1	0.573737	0.24	0.759252	0.524181	203.937	302.9	5
M204T344	4.55938e+06	4.57486e+06	11.27	4.24551e+06	4.21811e+06	7.14	1.07	0.1	0.234499	0.63	0.4544	0.801848	204.014	344.3	5.7
M204T349	511151	587115	38.68	497234	508310	30.15	1.03	0.04	0.645377	0.19	0.808158	0.103975	204.124	349.2	5.8
M204T363	1.82723e+07	1.80773e+07	78.24	2.56494e+06	1.39947e+06	142.79	7.12	2.83	0.0018648	2.73	0.0213197	1.65266	204.086	362.9	6
M204T372	202684	178276	33.94	186065	170325	49.86	1.09	0.12	0.798446	0.1	0.895187	0.443979	204.113	372.4	6.2
M204T374	92015.3	105397	36.67	73626	68120.2	30.12	1.25	0.32	0.130381	0.88	0.317655	0.451982	203.937	374.1	6.2
M204T444	68376.5	49893	89.15	82003	96714.8	73.42	0.83	-0.26	0.720901	0.14	0.850988	0.111832	204.05	444.1	7.4
M204T447	173497	151177	53.01	295820	280153	40.64	0.59	-0.77	0.0649573	1.19	0.207149	1.31424	204.066	447	7.4
M204T473	80094.5	83032.9	17.45	226852	221542	21.75	0.35	-1.5	0.0001554	3.81	0.00449411	2.1603	204.132	473.2	7.9
M204T476	11206.5	11906	23.52	7441.21	7646	47.3	1.51	0.59	0.0649573	1.19	0.207149	1.3443	204.016	476.1	7.9
M204T67	50434	52103.3	47.21	42420.5	48330.2	33.2	1.19	0.25	0.505361	0.3	0.709443	0.296004	203.937	67.4	1.1
M204T69	630779	613600	51.12	709335	617591	44.51	0.89	-0.17	0.505361	0.3	0.709443	0.445055	204.015	69	1.1
M204T76	1.31348e+06	1.38635e+06	20.84	1.55426e+06	1.46135e+06	19.95	0.85	-0.24	0.160528	0.79	0.36158	1.06346	204.051	75.9	1.3
M204T82	1.5398e+07	1.49474e+07	10.84	1.66164e+07	1.59284e+07	9.58	0.93	-0.11	0.194872	0.71	0.408126	0.857	204.004	81.9	1.4
M204T93	724007	717566	41.34	629732	496579	49.04	1.15	0.2	0.573737	0.24	0.759252	0.546317	204.124	93.1	1.6
M205T121	2.60894e+06	2.71688e+06	22.27	2.40464e+06	2.31228e+06	18.36	1.08	0.12	0.573737	0.24	0.759252	0.401342	205.036	121.2	2
M205T150	2.51453e+06	1.55018e+06	121.34	180528	183812	56.09	13.93	3.8	0.130381	0.88	0.317655	1.28929	205.035	149.6	2.5
M205T171	1.51282e+06	1.60928e+06	29.27	1.64692e+06	1.64356e+06	7.02	0.92	-0.12	0.720901	0.14	0.850988	0.576112	205.035	170.9	2.8
M205T334	117978	56402.5	101.58	380111	346139	53.11	0.31	-1.69	0.00699301	2.16	0.0487438	1.71737	204.981	334	5.6
M205T344	371577	261715	63.08	130963	107492	38.68	2.84	1.5	0.0010878	2.96	0.0151734	1.72367	205.017	344.3	5.7
M205T363	1.08397e+06	1.16487e+06	33.86	994193	978983	23.1	1.09	0.12	0.573737	0.24	0.759252	0.241275	205.088	362.9	6
M205T505	145025	149191	9.45	198758	183860	31.89	0.73	-0.45	0.00699301	2.16	0.0487438	1.42361	205.124	505.1	8.4
M205T525	81996.7	82581.4	21.58	90735.4	92464.6	8.07	0.9	-0.15	0.234499	0.63	0.4544	0.818704	205.05	524.6	8.7
M205T546	175274	187616	30.22	131363	117378	46.56	1.33	0.42	0.278632	0.55	0.503994	0.844189	205.054	545.5	9.1
M205T568	46833.1	46514	18.14	34346.3	35914.9	28.35	1.36	0.45	0.0206682	1.68	0.0984557	1.28177	205.054	568.2	9.5
M205T581	2.94898e+06	2.92177e+06	46.99	583969	731366	67.45	5.05	2.34	0.004662	2.33	0.0380456	1.50526	204.946	581.1	9.7
M205T66	77785.5	76892.1	66.08	61655.1	60377.4	54.99	1.26	0.34	0.505361	0.3	0.709443	0.223265	205.023	66	1.1
M205T69	1.4301e+06	1.36462e+06	14.41	1.40511e+06	1.38334e+06	7.76	1.02	0.03	0.720901	0.14	0.850988	0.0418208	204.999	69.4	1.2
M206T104	537433	520097	17.48	485377	465893	16.44	1.11	0.15	0.234499	0.63	0.4544	0.719628	206.049	103.8	1.7
M206T110	1.27982e+06	1.21413e+06	24.61	690931	733140	51.22	1.85	0.89	0.00699301	2.16	0.0487438	1.42922	206.013	109.6	1.8
M206T122	2.49471e+06	2.48848e+06	24.62	1.6729e+06	1.70211e+06	42.83	1.49	0.58	0.0379176	1.42	0.147066	1.28929	206.049	122.1	2
M206T139	2.59872e+06	2.5237e+06	46.75	3.57545e+06	2.81069e+06	58.4	0.73	-0.46	0.505361	0.3	0.709443	0.642674	206.013	139	2.3
M206T147	293888	277840	33.96	380440	287173	67.51	0.77	-0.37	0.798446	0.1	0.895187	0.323984	206.046	147.5	2.5
M206T175	1.02104e+06	1.03347e+06	16.26	1.26508e+06	1.22118e+06	11.73	0.81	-0.31	0.0104118	1.98	0.0628046	1.52475	206.013	175	2.9
M206T292	196512	180995	18.22	142702	147070	24.34	1.38	0.46	0.0104118	1.98	0.0628046	1.47015	206.103	292.3	4.9
M206T384	1.74436e+06	501361	133.62	1.68835e+06	893427	142	1.03	0.05	0.798446	0.1	0.895187	0.346756	206.082	384	6.4
M206T513	167564	168478	17.17	172829	171172	14.58	0.97	-0.04	0.878477	0.06	0.936588	0.241569	206.086	513.3	8.6
M206T550_1	448587	510193	49.59	540896	506336	50.97	0.83	-0.27	0.798446	0.1	0.895187	0.506615	205.95	549.7	9.2
M206T550_2	443436	398222	97.03	144895	58376.1	126.98	3.06	1.61	0.130381	0.88	0.317655	0.812641	206.065	549.5	9.2
M206T70	1.7551e+06	1.81683e+06	18.47	1.85173e+06	1.89573e+06	14.2	0.95	-0.08	0.573737	0.24	0.759252	0.477827	206.038	70.4	1.2
M206T741	385028	389252	28.39	285249	278073	58.85	1.35	0.43	0.194872	0.71	0.408126	0.890952	206.155	741	12.3
M206T82	4.65234e+06	4.5547e+06	16.59	4.82392e+06	4.86931e+06	6.74	0.96	-0.05	0.645377	0.19	0.808158	0.349262	206.001	81.8	1.4
M206T89	1.27516e+08	1.24888e+08	38.37	1.25393e+08	1.35086e+08	47.9	1.02	0.02	0.95913	0.02	0.981433	0.167634	206.103	89.4	1.5
M207T104	1.38058e+06	1.47486e+06	32.85	762129	816358	41.26	1.81	0.86	0.014763	1.83	0.078691	1.34196	207.046	103.5	1.7
M207T476	371674	273626	81.17	475519	347169	60.92	0.78	-0.36	0.441803	0.35	0.659657	0.647168	207.012	476.4	7.9
M207T524	931360	911545	16.48	494144	491005	22.55	1.88	0.91	0.0001554	3.81	0.00449411	2.07586	207.103	523.6	8.7
M207T532	98316.6	76718.3	92.15	28728.4	5140.53	224	3.42	1.77	0.004662	2.33	0.0380456	1.49318	207.139	531.6	8.9
M207T537	89709.5	98763.8	36.73	152436	148836	35.16	0.59	-0.76	0.0281274	1.55	0.119973	1.3661	207.031	537.1	9
M207T550	3.17274e+06	2.59704e+06	86.76	1.51608e+06	319649	188.12	2.09	1.07	0.0281274	1.55	0.119973	1.34092	206.943	549.8	9.2
M207T581_1	797395	512060	70.72	1.97704e+06	1.61022e+06	58.21	0.4	-1.31	0.014763	1.83	0.078691	1.51567	206.943	581.2	9.7
M207T609	276848	271795	35.25	561819	409316	72.33	0.49	-1.02	0.0649573	1.19	0.207149	1.27397	207.07	609.3	10.2
M207T622	693518	608535	44.83	979956	722205	63.86	0.71	-0.5	0.441803	0.35	0.659657	0.634158	207.103	622.4	10.4
M207T70	216495	219405	31.52	240339	227131	17.28	0.9	-0.15	0.573737	0.24	0.759252	0.671814	207.04	70.5	1.2
M207T75	4.08979e+06	3.97439e+06	63.81	6.2531e+06	6.19017e+06	56.25	0.65	-0.61	0.234499	0.63	0.4544	0.655072	207.015	74.6	1.2
M207T754	46728.3	49649.8	55.76	48761.2	59026.1	58.01	0.96	-0.06	0.95913	0.02	0.981433	0.076219	207.175	753.7	12.6
M207T89	6.55009e+06	6.76869e+06	34.96	7.15151e+06	6.61687e+06	26.26	0.92	-0.13	0.95913	0.02	0.981433	0.400868	207.107	89.5	1.5
M207T91	2.92867e+06	2.89064e+06	40.11	3.44333e+06	3.28418e+06	37.48	0.85	-0.23	0.720901	0.14	0.850988	0.531725	207.051	91.2	1.5
M208T109	1.43063e+07	1.436e+07	14.61	7.83112e+06	8.06737e+06	18.15	1.83	0.87	0.0001554	3.81	0.00449411	2.03602	208.028	109	1.8
M208T112	2.45286e+06	2.46112e+06	6.53	3.3171e+06	3.043e+06	25.6	0.74	-0.44	0.000621601	3.21	0.0104451	1.56118	208.072	112	1.9
M208T126	493402	470506	40.84	409584	444164	46.38	1.2	0.27	0.382284	0.42	0.606076	0.544801	208.061	125.5	2.1
M208T152	3.34702e+06	3.84707e+06	48.1	3.55685e+06	3.49404e+06	92.15	0.94	-0.09	0.95913	0.02	0.981433	0.546767	208.028	152.1	2.5
M208T176	636320	461373	60.72	384211	289704	57.26	1.66	0.73	0.130381	0.88	0.317655	0.878975	208.061	176	2.9
M208T211	3.85725e+06	3.52521e+06	38.13	2.57529e+06	2.6575e+06	28.86	1.5	0.58	0.104895	0.98	0.278831	1.1252	208.028	210.7	3.5
M208T247	1.48752e+07	7.46236e+06	111.72	678855	591353	59.62	21.91	4.45	0.0829837	1.08	0.241068	1.32114	208.028	247.1	4.1
M208T37	834539	842131	4.64	760044	773906	10.3	1.1	0.13	0.0498834	1.3	0.173853	1.34209	207.931	37.1	0.6
M208T431	241387	190791	77.47	248408	178455	86.17	0.97	-0.04	0.878477	0.06	0.936588	0.0596055	208.098	431.1	7.2
M208T495	437146	440950	24.58	269475	263011	30.43	1.62	0.7	0.0029526	2.53	0.0288032	1.51219	208.098	495.1	8.3
M208T498	1.77635e+06	1.70844e+06	16.69	1.25755e+06	1.21038e+06	21.49	1.41	0.5	0.0018648	2.73	0.0213197	1.72993	208.062	497.6	8.3
M208T585	68299.3	69014.3	48.05	19497.1	19494.5	45.7	3.5	1.81	0.0018648	2.73	0.0213197	1.77928	208.134	584.9	9.7
M208T623	73239.8	68685.1	55.76	102193	76481.8	81.12	0.72	-0.48	0.720901	0.14	0.850988	0.359601	208.106	622.6	10.4
M208T739	418740	427012	49.23	368671	345491	49.91	1.14	0.18	0.798446	0.1	0.895187	0.314131	208.134	739.4	12.3
M208T85	5.22789e+07	3.97143e+07	54.75	4.47152e+07	3.9891e+07	43.67	1.17	0.23	0.95913	0.02	0.981433	0.214965	207.969	85.2	1.4
M208T89	783958	767416	18.97	673529	737509	28.31	1.16	0.22	0.382284	0.42	0.606076	0.699253	208.108	89.4	1.5
M209T100	7.43326e+06	7.75185e+06	15.11	4.87962e+06	3.91759e+06	44.34	1.52	0.61	0.014763	1.83	0.078691	1.42305	209.067	99.8	1.7
M209T108_2	909729	941123	25.78	601452	579316	24.5	1.51	0.6	0.0104118	1.98	0.0628046	1.53631	209.036	107.7	1.8
M209T112	231330	240576	16.42	280253	277518	16.78	0.83	-0.28	0.014763	1.83	0.078691	1.0606	209.076	112	1.9
M209T168	223110	146551	70.43	176600	158105	41.38	1.26	0.34	0.95913	0.02	0.981433	0.237766	208.986	167.6	2.8
M209T289	1.94412e+06	2.08893e+06	59.46	2.9893e+06	3.30344e+06	66.62	0.65	-0.62	0.234499	0.63	0.4544	0.241335	209.046	289.2	4.8
M209T296	327288	330592	19.43	326642	317198	27.33	1	0	0.95913	0.02	0.981433	0.174418	209.093	296.2	4.9
M209T304	3.39492e+06	3.29063e+06	49.82	2.12418e+06	2.10331e+06	35.14	1.6	0.68	0.0829837	1.08	0.241068	0.830631	209.045	303.6	5.1
M209T324	760251	740737	15.76	350397	377903	37.12	2.17	1.12	0.0001554	3.81	0.00449411	1.7714	209.104	324.4	5.4
M209T334	787407	780891	21.14	756562	619299	51.28	1.04	0.06	0.441803	0.35	0.659657	0.358729	209.104	334.1	5.6
M209T483	837392	709382	88.86	1.74478e+06	1.75938e+06	36.36	0.48	-1.06	0.0281274	1.55	0.119973	1.25992	209.118	482.9	8
M209T493	51038.3	52475.6	16.21	50493.6	49209.4	13.44	1.01	0.02	0.720901	0.14	0.850988	0.0820074	209.129	492.8	8.2
M209T525_1	122145	107423	64.11	98528.1	82888.8	41.19	1.24	0.31	0.382284	0.42	0.606076	0.036411	209.094	525.2	8.8
M209T525_2	511492	463788	32.27	594983	635587	20.65	0.86	-0.22	0.234499	0.63	0.4544	0.738547	209.118	525.2	8.8
M209T535	724798	752532	58.42	642498	692337	34.4	1.13	0.17	0.645377	0.19	0.808158	0.0105375	209.118	534.8	8.9
M209T544_1	713286	572438	46.22	870162	711220	51.44	0.82	-0.29	0.382284	0.42	0.606076	0.428552	209.118	544.1	9.1
M209T550	554670	481591	68.43	285869	193236	96.22	1.94	0.96	0.130381	0.88	0.317655	1.06913	208.941	549.8	9.2
M209T559	1.99665e+06	2.10376e+06	43.7	1.28047e+06	1.10978e+06	32.15	1.56	0.64	0.130381	0.88	0.317655	0.889118	208.984	559.3	9.3
M209T581	262784	218573	47.53	138895	89073.4	75.16	1.89	0.92	0.0379176	1.42	0.147066	1.41856	208.94	581	9.7
M209T603_1	145937	138681	36.16	128701	90065.8	84.86	1.13	0.18	0.130381	0.88	0.317655	0.659293	209.118	602.7	10
M209T603_2	161233	130562	52.92	182815	200490	39.09	0.88	-0.18	0.573737	0.24	0.759252	0.432479	209.155	603	10.1
M209T683	373319	355249	52.17	161976	157134	37.1	2.3	1.2	0.014763	1.83	0.078691	1.50552	209.118	683.1	11.4
M209T74	1.68648e+07	1.80564e+07	44.22	1.93652e+07	1.80866e+07	31.71	0.87	-0.2	0.720901	0.14	0.850988	0.504783	209.03	73.9	1.2
M209T784	707273	558903	45.85	413470	364287	36.93	1.71	0.77	0.0379176	1.42	0.147066	1.31762	209.155	783.5	13.1
M209T79	1.18747e+07	1.16982e+07	15.25	1.26487e+07	1.16904e+07	38.76	0.94	-0.09	0.798446	0.1	0.895187	0.0319811	208.962	78.8	1.3
M209T82_1	6.9615e+06	6.95379e+06	19.42	6.15425e+06	6.42303e+06	22.19	1.13	0.18	0.505361	0.3	0.709443	0.798392	208.845	82.5	1.4
M209T82_2	4.2022e+06	3.85647e+06	54.08	3.25384e+06	3.04914e+06	37.8	1.29	0.37	0.505361	0.3	0.709443	0.685795	209.03	81.9	1.4
M209T85	1.33088e+06	1.18491e+06	52.18	1.28311e+06	1.15567e+06	26.54	1.04	0.05	0.95913	0.02	0.981433	0.211367	208.972	85.4	1.4
M209T91	4.12696e+06	2.16928e+06	104.72	5.41535e+06	5.13574e+06	25.54	0.76	-0.39	0.0829837	1.08	0.241068	1.09019	209.067	91.4	1.5
M210T100	490898	473543	63.93	735651	857055	69.51	0.67	-0.58	0.505361	0.3	0.709443	0.329186	210.07	99.8	1.7
M210T108	389530	417041	45.21	339016	338410	42.89	1.15	0.2	0.645377	0.19	0.808158	0.293717	209.989	107.6	1.8
M210T109	375012	474508	49.03	424354	499837	47.04	0.88	-0.18	0.573737	0.24	0.759252	0.300237	210.024	108.9	1.8
M210T115	176469	160566	34.07	205012	206930	24.99	0.86	-0.22	0.382284	0.42	0.606076	0.567974	210.088	114.9	1.9
M210T121	3.18689e+06	3.21468e+06	54.82	2.4858e+06	2.84652e+06	60.89	1.28	0.36	0.278632	0.55	0.503994	0.403303	210.008	121.5	2
M210T127	2.24757e+07	2.19707e+07	17.79	2.06511e+07	2.1125e+07	18.91	1.09	0.12	0.441803	0.35	0.659657	0.541146	210.044	126.7	2.1
M210T130	280246	268526	22.53	160679	142535	25.54	1.74	0.8	0.0018648	2.73	0.0213197	1.84658	210.026	130.5	2.2
M210T156	623630	564102	23.21	554867	541695	10.28	1.12	0.17	0.382284	0.42	0.606076	0.692722	209.99	156.4	2.6
M210T211	119923	111120	47.61	205166	186479	55.38	0.58	-0.77	0.0498834	1.3	0.173853	1.10814	210.024	210.6	3.5
M210T289	380923	267358	107.74	508932	214166	120.49	0.75	-0.42	0.798446	0.1	0.895187	0.248493	210.049	289.1	4.8
M210T303_1	487552	472900	27.77	377855	348206	32.28	1.29	0.37	0.160528	0.79	0.36158	1.11441	210.049	303.5	5.1
M210T303_2	446471	421700	53.49	700748	647667	52.71	0.64	-0.65	0.194872	0.71	0.408126	0.904925	210.077	303	5
M210T321	312559	348705	33.66	381535	379531	16.09	0.82	-0.29	0.234499	0.63	0.4544	0.928524	210.088	320.7	5.3
M210T326	324840	330900	20.1	186446	157000	66.87	1.74	0.8	0.0281274	1.55	0.119973	1.45469	210.026	325.6	5.4
M210T328	461439	430968	32.49	569339	576195	30.81	0.81	-0.3	0.194872	0.71	0.408126	0.741285	209.99	327.8	5.5
M210T333	223678	220163	28.05	277727	278603	20.85	0.81	-0.31	0.130381	0.88	0.317655	0.958961	210.077	332.7	5.5
M210T334	42036.7	37389.3	53.15	85843.2	92436.5	25.71	0.49	-1.03	0.004662	2.33	0.0380456	1.66326	210.108	334	5.6
M210T336	3.1687e+06	3.01299e+06	30.05	4.90318e+06	4.5913e+06	23.86	0.65	-0.63	0.0498834	1.3	0.173853	1.56293	209.99	335.7	5.6
M210T364	7.74765e+07	7.84936e+07	24.79	2.94159e+07	2.35595e+07	82.85	2.63	1.4	0.0029526	2.53	0.0288032	1.68467	209.99	363.9	6.1
M210T376	554565	318318	93.59	101298	35298.7	147.52	5.47	2.45	0.00699301	2.16	0.0487438	1.52737	210.077	376.3	6.3
M210T387	78198.4	73196.3	38.81	23409.8	24619.2	49.7	3.34	1.74	0.0001554	3.81	0.00449411	1.83342	210.041	386.7	6.4
M210T483	292732	276136	73.57	180328	133257	65.3	1.62	0.7	0.278632	0.55	0.503994	0.263741	210.121	482.7	8
M210T663	305269	288689	39.44	253299	221494	42.22	1.21	0.27	0.441803	0.35	0.659657	0.724157	210.049	662.5	11
M210T69	690296	675869	81.89	1.24948e+06	1.19298e+06	13.06	0.55	-0.86	0.130381	0.88	0.317655	1.32444	210.008	68.6	1.1
M210T74	1.44613e+06	1.32425e+06	41.07	556010	564972	28.23	2.6	1.38	0.000621601	3.21	0.0104451	1.81506	210.034	73.9	1.2
M210T95	7.15143e+06	6.65986e+06	29.52	4.79717e+06	4.45953e+06	28.37	1.49	0.58	0.0206682	1.68	0.0984557	1.36665	210.044	94.7	1.6
M211T108	2.02528e+06	2.0449e+06	9.81	1.73788e+06	1.75306e+06	10.55	1.17	0.22	0.014763	1.83	0.078691	1.4231	210.983	107.7	1.8
M211T125_1	382836	383315	76.67	139495	123658	84.82	2.74	1.46	0.130381	0.88	0.317655	0.879886	211.072	124.8	2.1
M211T125_2	892242	809104	48.86	615956	666272	70.64	1.45	0.53	0.278632	0.55	0.503994	0.825451	211.109	125.2	2.1
M211T127	1.26386e+06	1.29797e+06	16.53	1214320	1.23735e+06	16.75	1.04	0.06	0.720901	0.14	0.850988	0.248739	211.048	126.8	2.1
M211T304	257122	265234	15.67	279015	271661	10.31	0.92	-0.12	0.505361	0.3	0.709443	0.678801	211.093	304.1	5.1
M211T32	42927	43142	20.61	43977.5	42321.2	24.51	0.98	-0.03	0.878477	0.06	0.936588	0.0208162	210.901	31.6	0.5
M211T351	126452	147030	73.36	106464	148506	70.1	1.19	0.25	0.573737	0.24	0.759252	0.141868	210.884	350.7	5.8
M211T364	2.93031e+06	2.69664e+06	35.57	2.48299e+06	2.41466e+06	30.28	1.18	0.24	0.573737	0.24	0.759252	0.540317	210.994	363.8	6.1
M211T38	281347	161017	116.32	267019	176714	75.63	1.05	0.08	0.645377	0.19	0.808158	0.149692	210.884	38.1	0.6
M211T399	597809	571856	15.45	461503	499743	25.13	1.3	0.37	0.0379176	1.42	0.147066	1.09091	211.097	399.4	6.7
M211T440	143604	134632	60.6	90521.4	74326.2	78.47	1.59	0.67	0.194872	0.71	0.408126	0.867519	211.025	439.8	7.3
M211T54	281092	252257	36.21	220263	207161	24.36	1.28	0.35	0.234499	0.63	0.4544	0.808872	210.884	54.5	0.9
M211T565	1.68346e+06	1.95016e+06	54.42	1.42669e+06	1.15717e+06	65.41	1.18	0.24	0.645377	0.19	0.808158	0.265035	211.046	565.1	9.4
M211T616	4.64163e+06	4.71857e+06	21.59	945472	939434	21.85	4.91	2.3	0.0001554	3.81	0.00449411	2.25432	211.134	615.7	10.3
M211T625	897112	907359	40.7	940299	780433	70.86	0.95	-0.07	0.95913	0.02	0.981433	0.208484	211.134	625.4	10.4
M211T653	4.31406e+06	4.02491e+06	45.38	2.61419e+06	2.19632e+06	57.38	1.65	0.72	0.0649573	1.19	0.207149	1.18959	211.134	653.3	10.9
M211T70	5.64761e+06	3.5209e+06	85.03	6.42168e+06	4.5534e+06	65.92	0.88	-0.19	0.645377	0.19	0.808158	0.307321	210.992	70.2	1.2
M211T800	3.13876e+06	3.02993e+06	35.32	3.24935e+06	2.92093e+06	21.51	0.97	-0.05	0.573737	0.24	0.759252	0.276497	211.134	799.7	13.3
M211T82	1.49658e+07	1.52011e+07	22.15	7.48697e+06	7.57571e+06	19.11	2	1	0.0003108	3.51	0.00655521	2.02023	210.841	82.5	1.4
M211T90	1.71011e+06	1.45181e+06	58.66	1.39672e+06	979112	79.68	1.22	0.29	0.0379176	1.42	0.147066	0.73467	211.083	90.3	1.5
M212T113	61210.9	59577.6	9.69	44409.2	45515.2	39.49	1.38	0.46	0.0498834	1.3	0.173853	1.17517	212.067	112.7	1.9
M212T120	2.25356e+07	1.40282e+07	79.55	2.28348e+07	2.04694e+07	32.1	0.99	-0.02	0.505361	0.3	0.709443	0.517862	212.023	119.6	2
M212T126	44660.5	45263.7	28.63	52679.8	56819.5	28.76	0.85	-0.24	0.278632	0.55	0.503994	0.482721	212.094	126.1	2.1
M212T127	728793	893164	62.53	771626	849047	74.43	0.94	-0.08	1	0	1	0.356559	212.04	126.8	2.1
M212T296	357232	270940	106.72	1.05431e+06	920079	73.47	0.34	-1.56	0.0281274	1.55	0.119973	1.15208	212.093	295.5	4.9
M212T304	131019	138216	37.28	98763.2	86833.2	53.87	1.33	0.41	0.328205	0.48	0.552488	0.67056	212.006	303.8	5.1
M212T346	2.43745e+06	2.25912e+06	77.1	2.8543e+06	2.02605e+06	85.81	0.85	-0.23	0.95913	0.02	0.981433	0.0108582	212.093	345.9	5.8
M212T364	4.62423e+06	4.84857e+06	18.44	4.8278e+06	5.13231e+06	17.46	0.96	-0.06	0.441803	0.35	0.659657	0.270977	211.986	363.9	6.1
M212T419	3.79936e+06	2.37291e+06	91.15	1.71811e+06	1.14747e+06	99.94	2.21	1.14	0.234499	0.63	0.4544	0.940622	212.002	419.2	7
M212T468	54246.6	63030.6	58.74	32788.3	22494.8	109.13	1.65	0.73	0.278632	0.55	0.503994	0.821034	212.129	468.2	7.8
M212T654	308449	294988	48.68	217151	146789	89.94	1.42	0.51	0.104895	0.98	0.278831	0.89522	212.137	653.6	10.9
M212T763	848019	823622	22.75	555138	565970	29.32	1.53	0.61	0.0104118	1.98	0.0628046	1.45637	212.108	762.6	12.7
M212T82	1.68735e+06	1.76563e+06	47.69	3.22627e+06	3.18495e+06	24.33	0.52	-0.94	0.0018648	2.73	0.0213197	1.50795	211.97	82	1.4
M212T90	2.26739e+06	2.17459e+06	24.95	2.8169e+06	2.75844e+06	15.8	0.8	-0.31	0.0829837	1.08	0.241068	1.21184	211.996	90.2	1.5
M213T103	319109	324942	14.19	358553	359567	8.43	0.89	-0.17	0.0829837	1.08	0.241068	1.10692	213.038	102.7	1.7
M213T119	88541.2	89208	17.8	95836.8	96627.2	9.98	0.92	-0.11	0.382284	0.42	0.606076	0.678904	213.077	118.7	2
M213T127	8.53421e+06	8.90209e+06	12.78	7.88913e+06	8.33822e+06	12.77	1.08	0.11	0.160528	0.79	0.36158	0.705234	213.125	126.8	2.1
M213T190	949911	884264	16.05	912086	868653	12.82	1.04	0.06	0.573737	0.24	0.759252	0.276582	213.125	189.9	3.2
M213T264	308202	297885	18.58	282785	285200	15.46	1.09	0.12	0.382284	0.42	0.606076	0.527187	213.077	264	4.4
M213T31	138182	139662	12.56	135695	133944	11.61	1.02	0.03	0.441803	0.35	0.659657	0.145774	212.912	31.1	0.5
M213T364	170740	148491	63.32	194555	203892	28.3	0.88	-0.19	0.328205	0.48	0.552488	0.555186	212.989	363.8	6.1
M213T387	227189	237408	71.82	279132	302049	46.58	0.81	-0.3	0.382284	0.42	0.606076	0.533113	213.125	387.1	6.5
M213T419	239699	206754	46.41	77115.8	65580.7	75.61	3.11	1.64	0.004662	2.33	0.0380456	1.77092	213.005	419.2	7
M213T448	20771.5	25754.4	56.53	40112.5	39012.2	47.76	0.52	-0.95	0.00699301	2.16	0.0487438	0.81111	213.034	448.4	7.5
M213T473	631328	587581	51.33	466766	486421	31.43	1.35	0.44	0.234499	0.63	0.4544	0.522688	212.979	472.6	7.9
M213T483	109451	106947	41.88	102344	113849	42.29	1.07	0.1	0.798446	0.1	0.895187	0.310319	213.015	483	8.1
M213T56	176805	172694	27.6	143658	123262	43.39	1.23	0.3	0.160528	0.79	0.36158	0.745838	212.916	56.1	0.9
M213T560	121412	123279	19.02	125131	113009	31.68	0.97	-0.04	0.798446	0.1	0.895187	0.0780264	212.996	559.8	9.3
M213T592	260906	229347	36.62	75187.1	63211.4	37.06	3.47	1.79	0.0001554	3.81	0.00449411	2.07772	213.056	591.7	9.9
M213T656	1.18625e+06	1.26561e+06	18.98	1.66266e+06	1.59049e+06	30.61	0.71	-0.49	0.0498834	1.3	0.173853	1.22613	213.15	656.1	10.9
M213T670	2.57171e+07	2.12425e+07	41.34	3.12935e+07	2.40255e+07	33.79	0.82	-0.28	0.194872	0.71	0.408126	0.737361	213.149	670.3	11.2
M213T719	124620	106366	46.79	212779	178683	102.42	0.59	-0.77	0.441803	0.35	0.659657	0.312968	213.16	719.3	12
M213T732	1.70687e+06	1.52953e+06	29.43	1.94447e+06	1.91925e+06	29.06	0.88	-0.19	0.328205	0.48	0.552488	0.455909	213.15	731.8	12.2
M213T77_1	1.8046e+06	1.67545e+06	30.63	1.88044e+06	1.7683e+06	26.34	0.96	-0.06	0.645377	0.19	0.808158	0.234568	212.98	76.8	1.3
M213T807	4.92134e+06	3.57351e+06	70.09	4.10686e+06	3.86671e+06	26.86	1.2	0.26	0.720901	0.14	0.850988	0.0527592	213.067	807	13.4
M213T82_1	4.93135e+06	4.74259e+06	15.01	4.65855e+06	4.70187e+06	15.28	1.06	0.08	0.573737	0.24	0.759252	0.527559	212.839	82.5	1.4
M213T82_2	2.50316e+06	2.61874e+06	13.6	3.19127e+06	3.17015e+06	25.15	0.78	-0.35	0.104895	0.98	0.278831	1.0789	212.886	82	1.4
M213T84_2	8.31501e+06	7.95743e+06	70.11	5.56828e+06	5.47228e+06	44.64	1.49	0.58	0.234499	0.63	0.4544	0.56704	213.085	83.8	1.4
M213T86	3.48874e+07	3.34373e+07	26.1	6.30336e+07	6.02038e+07	20.74	0.55	-0.85	0.000621601	3.21	0.0104451	1.88787	213.049	86.4	1.4
M213T89	539507	546202	12.65	863053	846088	15.44	0.63	-0.68	0.0001554	3.81	0.00449411	1.97271	213.037	88.6	1.5
M214T129	500196	498474	60.28	627287	684398	42.53	0.8	-0.33	0.505361	0.3	0.709443	0.171282	214.128	128.6	2.1
M214T149	718222	686228	28.01	518579	533572	17.1	1.38	0.47	0.0649573	1.19	0.207149	1.35454	214.072	149.1	2.5
M214T155	916160	965201	30.08	426653	245503	83.81	2.15	1.1	0.0206682	1.68	0.0984557	1.50648	214.072	154.9	2.6
M214T286	230925	159327	69.32	443210	233296	121.22	0.52	-0.94	0.441803	0.35	0.659657	0.576571	214.072	286.4	4.8
M214T31	424879	454707	35.09	417787	404450	60.52	1.02	0.02	0.573737	0.24	0.759252	0.270813	213.879	31.4	0.5
M214T355	70165.4	72842.1	90.29	66839.6	76976.7	41.57	1.05	0.07	0.95913	0.02	0.981433	0.51901	214.108	354.7	5.9
M214T395	157750	154863	33.65	254549	244541	18.83	0.62	-0.69	0.004662	2.33	0.0380456	1.65124	214.072	395.4	6.6
M214T412	31941.9	24271.2	61.62	21709.6	20307.4	58.08	1.47	0.56	0.382284	0.42	0.606076	0.911927	214.018	411.8	6.9
M214T419	46098.6	48842.2	64.49	76519	63752.2	62.38	0.6	-0.73	0.278632	0.55	0.503994	0.690804	213.998	419.2	7
M214T429	37744.3	39979	30.73	22502.8	13861.9	66.76	1.68	0.75	0.0379176	1.42	0.147066	1.30057	214.018	429.2	7.2
M214T442	112727	75693.4	96.34	12590.8	5013.69	125.93	8.95	3.16	0.004662	2.33	0.0380456	1.54908	213.964	441.8	7.4
M214T482	740870	403386	84.69	1.11287e+06	1.05186e+06	62.8	0.67	-0.59	0.160528	0.79	0.36158	0.822769	214.145	481.7	8
M214T596	97006.2	92998.6	61.72	58459	59932.6	35.98	1.66	0.73	0.160528	0.79	0.36158	0.806322	214.051	596.1	9.9
M214T670	3.49159e+06	3.36472e+06	17.75	6.02749e+06	5.3445e+06	35.29	0.58	-0.79	0.0018648	2.73	0.0213197	1.71873	214.153	670.3	11.2
M214T678	1.79749e+06	1.67184e+06	39.49	1.78303e+06	1.79035e+06	38.07	1.01	0.01	0.878477	0.06	0.936588	0.191856	214.153	678	11.3
M214T807	350906	300562	50.09	357601	396115	27.43	0.98	-0.03	0.505361	0.3	0.709443	0.357426	214.07	807.1	13.5
M214T86	3.95086e+06	3.89286e+06	15.07	3.6943e+06	3.78521e+06	9.12	1.07	0.1	0.441803	0.35	0.659657	0.577288	214.048	86.4	1.4
M214T92	1.20727e+06	1.15122e+06	40.7	873227	889896	41.49	1.38	0.47	0.130381	0.88	0.317655	0.79612	214.077	91.7	1.5
M214T94	4.78069e+06	5.08837e+06	44.91	4.04792e+06	4.2978e+06	49.59	1.18	0.24	0.505361	0.3	0.709443	0.388491	214.023	94.3	1.6
M215T109_1	176107	146011	62.36	255513	285669	23.15	0.69	-0.54	0.194872	0.71	0.408126	1.04693	215.087	109.4	1.8
M215T109_2	200878	198317	5.16	211819	197876	16.99	0.95	-0.08	0.95913	0.02	0.981433	0.461935	215.14	109.3	1.8
M215T113	489858	515725	56.62	370584	389421	36.61	1.32	0.4	0.278632	0.55	0.503994	0.0706281	215.019	112.9	1.9
M215T115	3.02351e+06	3.00849e+06	90.77	3.63062e+06	3.31354e+06	25.47	0.83	-0.26	0.645377	0.19	0.808158	0.890587	215.049	114.9	1.9
M215T118	779185	662571	65.53	425517	422509	45.33	1.83	0.87	0.104895	0.98	0.278831	0.938281	215.104	117.7	2
M215T157	89683.9	99024.8	38.12	106439	104842	27.79	0.84	-0.25	0.720901	0.14	0.850988	0.734753	215.14	157	2.6
M215T285	203698	135173	92.01	144336	109646	65	1.41	0.5	0.720901	0.14	0.850988	0.136695	215.033	284.9	4.7
M215T296	532139	519298	76.16	109007	106758	34.28	4.88	2.29	0.0206682	1.68	0.0984557	1.50959	215.049	296.4	4.9
M215T303	595476	576784	44.94	116302	114702	56.94	5.12	2.36	0.0010878	2.96	0.0151734	1.86161	215.092	303.3	5.1
M215T31_1	177463	176944	11.18	165377	165510	3.47	1.07	0.1	0.505361	0.3	0.709443	0.917337	214.859	30.7	0.5
M215T31_2	29940.1	26566.5	50.32	27328	26564.7	43.9	1.1	0.13	0.798446	0.1	0.895187	0.154171	214.88	31.5	0.5
M215T31_3	59203.5	57271.4	14.87	63007.1	66353.3	16.95	0.94	-0.09	0.382284	0.42	0.606076	0.432538	214.949	31.4	0.5
M215T327	119224	127813	52.11	163115	157664	36.34	0.73	-0.45	0.278632	0.55	0.503994	0.85464	215.05	326.7	5.4
M215T374	258799	271704	32.81	306105	290818	22.01	0.85	-0.24	0.382284	0.42	0.606076	0.900403	215.093	374.1	6.2
M215T420	84662.9	81156.1	39.98	104452	104849	30.15	0.81	-0.3	0.382284	0.42	0.606076	0.682059	215.083	420.4	7
M215T471	304496	129791	131	4.87039e+06	4.81294e+06	33.3	0.06	-4	0.0001554	3.81	0.00449411	2.01197	215.129	470.6	7.8
M215T597	65140.5	61458	45.69	96274.6	99115.7	49.3	0.68	-0.56	0.234499	0.63	0.4544	0.673188	215.144	596.6	9.9
M215T604	223475	173374	97.21	461010	435362	40.55	0.48	-1.04	0.104895	0.98	0.278831	1.32093	214.977	603.8	10.1
M215T671	281390	280489	10.38	253212	203304	42.83	1.11	0.15	0.505361	0.3	0.709443	0.811075	215.155	670.5	11.2
M215T683	1.7023e+07	1.7966e+07	35.27	13815801	1.30355e+07	29.02	1.23	0.3	0.278632	0.55	0.503994	0.696648	215.165	682.5	11.4
M215T703	2.05591e+06	1.68343e+06	46.79	1.89043e+06	1.92968e+06	42.96	1.09	0.12	1	0	1	0.265169	215.165	703.5	11.7
M215T72	852310	831952	33.36	759880	768136	30.64	1.12	0.17	0.441803	0.35	0.659657	0.410721	214.996	72	1.2
M215T738	3.03519e+06	2.47919e+06	94.25	1.8562e+06	1.78027e+06	50.35	1.64	0.71	0.278632	0.55	0.503994	0.623335	215.051	738.2	12.3
M215T82_1	909339	894047	49.25	801723	769849	60.95	1.13	0.18	0.382284	0.42	0.606076	0.368093	214.836	82.4	1.4
M215T83	9.08822e+06	8.76544e+06	42.97	6.67931e+06	5.94287e+06	43.11	1.36	0.44	0.278632	0.55	0.503994	0.879779	215.032	82.6	1.4
M215T90	688476	652565	18.69	806949	893555	41.7	0.85	-0.23	0.0829837	1.08	0.241068	0.08262	215.005	89.7	1.5
M215T91	1.61189e+07	1.61385e+07	20.36	1.42356e+07	1.40679e+07	15.84	1.13	0.18	0.130381	0.88	0.317655	0.763288	215.033	90.6	1.5
M215T95	490528	485633	13.05	514582	529887	7.84	0.95	-0.07	0.278632	0.55	0.503994	0.630518	215.104	95.4	1.6
M216T107	110371	107005	28.27	50806	59996	53.69	2.17	1.12	0.0010878	2.96	0.0151734	1.51749	216.099	107.3	1.8
M216T122	1.52837e+06	1.41366e+06	33.1	1.51607e+06	1.54985e+06	31.12	1.01	0.01	0.878477	0.06	0.936588	0.129747	216.088	121.7	2
M216T153	260308	292673	46.43	281167	281270	44.46	0.93	-0.11	0.645377	0.19	0.808158	0.226244	216.034	153.4	2.6
M216T296	57348.2	49663.2	50.54	56180.2	56570.9	36.56	1.02	0.03	1	0	1	0.089228	216.053	296	4.9
M216T304	42883.7	40624.8	26.12	28971.2	28941.8	15.38	1.48	0.57	0.0029526	2.53	0.0288032	1.60986	216.088	304.1	5.1
M216T31_1	45910.4	40746.4	24.07	39541.2	34481.2	23.44	1.16	0.22	0.130381	0.88	0.317655	0.80634	215.846	31.2	0.5
M216T31_2	124320	123966	6.41	170717	124286	60.01	0.73	-0.46	1	0	1	0.127481	215.876	31.5	0.5
M216T31_3	475761	512916	14.08	431219	459184	14.96	1.1	0.14	0.194872	0.71	0.408126	0.837503	215.935	31.4	0.5
M216T361	184121	174510	29.01	115835	119787	24.59	1.59	0.67	0.004662	2.33	0.0380456	1.48136	216.034	360.9	6
M216T371	419255	391305	22.02	193194	221501	70.9	2.17	1.12	0.0029526	2.53	0.0288032	1.52561	215.528	371	6.2
M216T398	1.14272e+07	1.00686e+07	63.92	8.95161e+06	8.16136e+06	69.91	1.28	0.35	0.720901	0.14	0.850988	0.582403	216.033	398.2	6.6
M216T407	185598	159612	32.13	133316	101405	102.07	1.39	0.48	0.104895	0.98	0.278831	1.0661	216.07	406.9	6.8
M216T408	291532	149187	85.8	204517	172925	69.51	1.43	0.51	1	0	1	0.271387	216.088	408.1	6.8
M216T471	197886	158134	94.94	114265	137181	56.92	1.73	0.79	0.441803	0.35	0.659657	0.446612	216.132	470.6	7.8
M216T519	268111	215650	85.01	735756	668310	65.55	0.36	-1.46	0.0498834	1.3	0.173853	1.02553	216.124	518.7	8.6
M216T85	2.2809e+07	2.15887e+07	21.01	1.82287e+07	1.63967e+07	29.52	1.25	0.32	0.0281274	1.55	0.119973	1.11459	216.049	84.8	1.4
M216T91_1	2.47467e+06	2.1306e+06	79.78	125079	128219	26.08	19.78	4.31	0.0001554	3.81	0.00449411	2.09666	216.036	90.6	1.5
M216T91_2	2.69941e+06	3.06947e+06	30.8	3.26169e+06	3.49626e+06	35.68	0.83	-0.27	0.194872	0.71	0.408126	0.429563	216.087	91.4	1.5
M216T92	654834	603041	25	393546	390285	29.9	1.66	0.73	0.000621601	3.21	0.0104451	1.73194	216.076	91.6	1.5
M216T97	1.75134e+06	1.43903e+06	79.4	3.52393e+06	3.29951e+06	40.86	0.5	-1.01	0.0206682	1.68	0.0984557	1.30058	216.051	97.1	1.6
M217T100	8.19035e+06	7.48716e+06	92.46	1.9672e+07	2.10235e+07	65.45	0.42	-1.26	0.0104118	1.98	0.0628046	0.854532	217.083	100.1	1.7
M217T108	549633	551364	3.83	550418	552109	3.96	1	0	1	0	1	0.0217744	217.119	107.5	1.8
M217T113	47406.1	47529.1	20.69	37879.9	35333.1	18.53	1.25	0.32	0.0649573	1.19	0.207149	1.14877	216.515	113.2	1.9
M217T220	21386.2	6058.73	146.71	98624	14929.6	202.78	0.22	-2.21	0.0829837	1.08	0.241068	0.858883	216.935	220	3.7
M217T236	777495	664156	82.49	258769	279226	48.47	3	1.59	0.0649573	1.19	0.207149	0.960628	217.108	236.2	3.9
M217T303	115119	69699.2	84.42	83015.9	61521.4	66.94	1.39	0.47	0.573737	0.24	0.759252	0.326655	217.108	303.2	5.1
M217T31_1	1.63269e+06	1.65723e+06	9.12	1.55839e+06	1.59785e+06	10.35	1.05	0.07	0.328205	0.48	0.552488	0.608416	216.855	30.7	0.5
M217T31_2	36893.3	32770.5	24.28	38469.6	30688.4	30.65	0.96	-0.06	0.878477	0.06	0.936588	0.120188	216.937	31.5	0.5
M217T368	25771.5	25619.7	46.62	46179	48109.5	22.76	0.56	-0.84	0.0018648	2.73	0.0213197	1.43977	216.809	368.5	6.1
M217T375	356430	347309	39.85	263851	252778	34.77	1.35	0.43	0.194872	0.71	0.408126	0.871959	217.108	374.5	6.2
M217T432_1	36719.8	26680.6	73.24	259070	308533	52.22	0.14	-2.82	0.0001554	3.81	0.00449411	1.97319	217.062	432.2	7.2
M217T432_2	47653.6	45662.3	8.23	44913.8	45592.4	15.35	1.06	0.09	0.441803	0.35	0.659657	0.66712	217.144	431.8	7.2
M217T476	239388	236291	28.11	42706	42408.4	63.46	5.61	2.49	0.0001554	3.81	0.00449411	2.00565	217.017	475.8	7.9
M217T531	24331.1	20759.9	74.78	5775.3	4878.44	72.34	4.21	2.07	0.014763	1.83	0.078691	1.47655	216.964	531.5	8.9
M217T562	235326	186436	58.99	207209	180786	47.06	1.14	0.18	0.645377	0.19	0.808158	0.1946	217.144	562.3	9.4
M217T574	549550	502044	57.12	751087	711890	57.46	0.73	-0.45	0.441803	0.35	0.659657	0.648096	217.05	573.6	9.6
M217T717	672217	631722	26.36	613005	602212	26.17	1.1	0.13	0.573737	0.24	0.759252	0.416921	217.171	717.4	12
M217T85	4.97625e+07	2.62731e+07	111.3	6.66025e+07	6.40885e+07	19.35	0.75	-0.42	0.0379176	1.42	0.147066	1.18136	217.011	85.1	1.4
M217T90_2	3.67085e+06	3.81098e+06	10.25	3.31217e+06	3.39828e+06	10.63	1.11	0.15	0.0829837	1.08	0.241068	1.0249	217.083	90.3	1.5
M217T91	5.24939e+06	5.31596e+06	10.65	4.64099e+06	4.63423e+06	11.99	1.13	0.18	0.0649573	1.19	0.207149	1.10917	217.029	90.8	1.5
M217T99	574979	527978	33.56	383979	362319	20.4	1.5	0.58	0.0206682	1.68	0.0984557	1.42166	217.035	99.1	1.7
M218T106	1.34226e+06	1.49872e+06	36.44	2.13901e+06	2.26012e+06	40.44	0.63	-0.67	0.0829837	1.08	0.241068	1.00883	218.013	105.5	1.8
M218T108	4.83489e+06	4.34476e+06	70.8	6.11441e+06	5.86734e+06	53.37	0.79	-0.34	0.505361	0.3	0.709443	0.450917	218.067	107.5	1.8
M218T149	1.18404e+06	1.1947e+06	7.67	1.26767e+06	1.27248e+06	14.05	0.93	-0.1	0.328205	0.48	0.552488	0.674441	218.013	148.6	2.5
M218T151	1.45044e+08	1.28667e+08	80.89	2.82407e+07	2.92918e+07	32.99	5.14	2.36	0.00699301	2.16	0.0487438	1.50767	218.104	151	2.5
M218T295	1.07701e+06	952700	47.36	739176	531965	63.3	1.46	0.54	0.130381	0.88	0.317655	0.85078	218.013	295.5	4.9
M218T303	230432	216508	21.03	224459	234661	26.75	1.03	0.04	0.95913	0.02	0.981433	0.196453	218.101	303.1	5.1
M218T31	232228	214127	68.8	422268	369847	51.71	0.55	-0.86	0.104895	0.98	0.278831	1.14704	217.853	30.7	0.5
M218T310	1.30251e+06	1.23216e+06	41.77	1.30957e+06	1.26281e+06	31.01	0.99	-0.01	0.798446	0.1	0.895187	0.0810133	218.013	309.7	5.2
M218T359	4.76897e+06	4.51584e+06	42.38	6.66771e+06	5.57359e+06	63.78	0.72	-0.48	0.382284	0.42	0.606076	0.300383	218.049	359	6
M218T386	82724.9	54219.5	74.61	127925	136644	49.03	0.65	-0.63	0.0829837	1.08	0.241068	0.985938	218.013	386.1	6.4
M218T393	511018	547168	25.85	542366	561028	24.64	0.94	-0.09	0.382284	0.42	0.606076	0.137938	218.022	393.5	6.6
M218T403	1.66538e+06	1.38613e+06	75	1.73811e+06	1.27637e+06	64.09	0.96	-0.06	0.720901	0.14	0.850988	0.278993	218.082	402.8	6.7
M218T413	584906	489674	74.56	670437	636722	42.46	0.87	-0.2	0.720901	0.14	0.850988	0.396331	217.995	413.4	6.9
M218T500	896533	852162	37.06	851128	817192	18.52	1.05	0.07	0.798446	0.1	0.895187	0.075791	218.121	500.5	8.3
M218T519	114796	102059	52.24	93398.5	90214.7	79.02	1.23	0.3	0.573737	0.24	0.759252	0.806215	218.031	519	8.7
M218T741	260587	153568	120.86	132347	128266	73.25	1.97	0.98	0.95913	0.02	0.981433	0.252763	218.126	741.3	12.4
M218T80	1.07862e+07	9.38415e+06	50.27	9.46077e+06	8.50519e+06	78.79	1.14	0.19	0.505361	0.3	0.709443	0.549033	218.067	80.3	1.3
M218T85	6.53008e+06	3.58113e+06	81.12	1.35575e+07	1.25864e+07	55.77	0.48	-1.05	0.0281274	1.55	0.119973	1.28055	218.012	85.1	1.4
M219T100	236533	203385	40.98	183558	181724	28.83	1.29	0.37	0.328205	0.48	0.552488	0.816313	219.087	100.4	1.7
M219T107	476595	487448	45.35	440844	438416	14.52	1.08	0.11	0.573737	0.24	0.759252	0.107549	219.069	106.7	1.8
M219T112	1.01588e+06	1.14272e+06	38.97	1.13241e+06	1.15596e+06	22.19	0.9	-0.16	0.798446	0.1	0.895187	0.436601	219.047	112.2	1.9
M219T121	1.38529e+06	1.52732e+06	51.85	1.02637e+06	513073	90.32	1.35	0.43	0.234499	0.63	0.4544	0.826825	219.047	121.3	2
M219T122	7.22433e+07	7.38955e+07	16.53	6.21564e+07	6.13678e+07	15.79	1.16	0.22	0.130381	0.88	0.317655	1.03284	219.106	122.2	2
M219T149	196133	181396	19.64	108460	104769	22.8	1.81	0.85	0.0001554	3.81	0.00449411	1.91173	218.992	148.6	2.5
M219T151_2	1.58695e+07	1.62005e+07	63.18	1.58241e+07	1.63247e+07	44.71	1	0	0.95913	0.02	0.981433	0.0823309	219.107	151	2.5
M219T168	655851	673312	9.78	612049	615124	4.39	1.07	0.1	0.194872	0.71	0.408126	1.00575	219.015	168.2	2.8
M219T179	653990	643123	66.82	432544	319911	55.72	1.51	0.6	0.645377	0.19	0.808158	0.493198	219.077	179.2	3
M219T212	1.10145e+06	661269	105.1	696356	568997	74.86	1.58	0.66	0.505361	0.3	0.709443	0.396552	219.077	212	3.5
M219T31_1	59765.5	56265.4	24.98	50014.4	49701	9.96	1.19	0.26	0.130381	0.88	0.317655	0.9359	218.825	30.7	0.5
M219T31_2	96084.7	59775.4	67.84	102984	117661	44.27	0.93	-0.1	0.878477	0.06	0.936588	0.182815	218.852	30.8	0.5
M219T326	849241	441227	100.18	3.48021e+06	561083	222.12	0.24	-2.03	0.878477	0.06	0.936588	0.424391	219.077	326.2	5.4
M219T361	195210	198500	80.94	506810	447303	59.76	0.39	-1.38	0.00699301	2.16	0.0487438	1.35907	219.077	361.2	6
M219T403	192887	147557	62.79	287531	306882	27.12	0.67	-0.58	0.0829837	1.08	0.241068	1.24374	219.087	402.5	6.7
M219T413	10871.3	9586.44	95.34	41835.2	44395.3	24.59	0.26	-1.94	0.0010878	2.96	0.0151734	1.84985	218.999	413.3	6.9
M219T476	190952	226178	51.44	212953	230012	64.4	0.9	-0.16	0.720901	0.14	0.850988	0.136869	219.102	475.8	7.9
M219T501	164856	154284	35.38	127308	119779	21.96	1.29	0.37	0.104895	0.98	0.278831	0.828957	219.125	500.5	8.3
M219T537	202670	182107	31.81	224364	209583	56.58	0.9	-0.15	1	0	1	0.127482	219.066	536.7	8.9
M219T563	2.63689e+06	2.64584e+06	16.9	1.62987e+06	1.53199e+06	34.89	1.62	0.69	0.0018648	2.73	0.0213197	1.65666	218.986	562.6	9.4
M219T741	1.77802e+06	800853	129	1.59779e+06	1.14078e+06	113.56	1.11	0.15	0.720901	0.14	0.850988	0.604532	219.123	741.3	12.4
M219T83	2.93563e+06	2.6356e+06	72.05	2.20551e+06	2.23558e+06	32.11	1.33	0.41	0.720901	0.14	0.850988	0.151897	218.874	83.1	1.4
M219T85	3.72622e+06	3.42128e+06	43.95	3.79952e+06	3.51417e+06	39.5	0.98	-0.03	0.798446	0.1	0.895187	0.13285	219.01	85.1	1.4
M219T96	6.8694e+06	6.91023e+06	55.86	4.57195e+06	4.68498e+06	31.03	1.5	0.59	0.0829837	1.08	0.241068	0.43204	219.051	96.3	1.6
M220T104	1.33494e+07	1.11957e+07	35.99	1.24139e+07	1.11326e+07	58.06	1.08	0.1	0.720901	0.14	0.850988	0.523609	220.04	103.7	1.7
M220T122_1	4.2979e+08	4.534e+08	13.17	3.80648e+08	3.89262e+08	17.87	1.13	0.18	0.194872	0.71	0.408126	0.833111	220.028	121.9	2
M220T122_2	6705846	6.47426e+06	6.09	7.43136e+06	7.2134e+06	7.29	0.9	-0.15	0.0206682	1.68	0.0984557	1.49561	220.107	122.2	2
M220T147	112450	98891.1	74.38	233927	248899	28.97	0.48	-1.06	0.0104118	1.98	0.0628046	1.44453	220.065	147.3	2.5
M220T151	8.31255e+07	8.32636e+07	14.16	7.44336e+07	7.61798e+07	7.53	1.12	0.16	0.160528	0.79	0.36158	1.08362	220.029	151.3	2.5
M220T287	173348	163380	22.3	77960.8	90538.6	69.15	2.22	1.15	0.0018648	2.73	0.0213197	1.2784	220.028	286.6	4.8
M220T33	286002	283420	7.65	286818	285657	11.28	1	0	0.878477	0.06	0.936588	0.103714	219.845	33.5	0.6
M220T366	1.58313e+06	1.49223e+06	23.44	1.40075e+06	1.46598e+06	54.48	1.13	0.18	0.441803	0.35	0.659657	0.696013	220.098	366.1	6.1
M220T393	154374	94286.7	76.83	161435	131244	63.84	0.96	-0.06	0.720901	0.14	0.850988	0.123339	220.02	393.4	6.6
M220T534	107071	108756	14.95	118158	119533	14.06	0.91	-0.14	0.278632	0.55	0.503994	0.80138	220.101	533.7	8.9
M220T545	394327	377446	47.18	197090	202944	43.56	2	1	0.0281274	1.55	0.119973	1.46784	220.034	545.1	9.1
M220T620	552980	559705	40.21	393335	314774	51.18	1.41	0.49	0.194872	0.71	0.408126	0.862963	219.984	620.4	10.3
M220T696	475265	376981	47.07	632431	657730	41.16	0.75	-0.41	0.441803	0.35	0.659657	0.63405	220.147	696.4	11.6
M220T80	4.47567e+06	4.46879e+06	14.62	4.26857e+06	4.59665e+06	27.41	1.05	0.07	1	0	1	0.313475	219.978	80.3	1.3
M220T81	6.42258e+06	6.90824e+06	42.94	4.01085e+06	2.94969e+06	66.66	1.6	0.68	0.130381	0.88	0.317655	1.05041	220.033	81.4	1.4
M220T91	1.12823e+07	1.00039e+07	45.96	1.21995e+07	1.31851e+07	38.64	0.92	-0.11	0.573737	0.24	0.759252	0.2259	220.083	91.1	1.5
M220T98	2.69083e+06	2.7533e+06	11.72	782919	814984	19.93	3.44	1.78	0.0001554	3.81	0.00449411	2.27439	220.082	98.3	1.6
M221T104	1.28112e+06	1.04966e+06	53.19	1.67387e+06	1.21509e+06	64.13	0.77	-0.39	0.573737	0.24	0.759252	0.270224	221.043	103.7	1.7
M221T108_1	954511	941957	18.9	690806	755959	29.94	1.38	0.47	0.0281274	1.55	0.119973	1.36465	220.939	107.6	1.8
M221T108_2	5.42472e+06	5.63816e+06	19.73	4.06671e+06	3.78461e+06	19.92	1.33	0.42	0.014763	1.83	0.078691	1.43227	221.03	108.4	1.8
M221T111	1.16041e+07	703522	181.24	2.72056e+07	1.12318e+06	164.92	0.43	-1.23	0.0379176	1.42	0.147066	0.505153	221.066	110.8	1.8
M221T122	4.99364e+07	4.45273e+07	38.43	4.65437e+07	4.44923e+07	20.25	1.07	0.1	0.95913	0.02	0.981433	0.0983999	221.031	121.9	2
M221T151	6.53507e+06	6.17272e+06	18.86	5.52995e+06	5.65734e+06	13.73	1.18	0.24	0.130381	0.88	0.317655	1.10434	221.032	151.3	2.5
M221T292	190356	165231	78.42	315383	324845	28.07	0.6	-0.73	0.0829837	1.08	0.241068	1.11488	221.068	292.3	4.9
M221T303	102356	94289.1	57.01	432049	281301	88.7	0.24	-2.08	0.0104118	1.98	0.0628046	1.52197	220.94	302.6	5
M221T312	137084	135486	27.04	251938	234225	21.94	0.54	-0.88	0.0001554	3.81	0.00449411	1.8339	221.068	312.1	5.2
M221T33	1.67694e+06	1.69666e+06	11.21	1.33097e+06	1.52091e+06	40.2	1.26	0.33	0.160528	0.79	0.36158	0.746685	220.938	33.2	0.6
M221T336	473275	409259	68.94	444558	331357	67.58	1.06	0.09	0.95913	0.02	0.981433	0.0915594	221.093	336.2	5.6
M221T35	282085	277766	13.58	434625	371745	51.02	0.65	-0.62	0.160528	0.79	0.36158	0.988063	221.119	35.2	0.6
M221T367	183656	224594	45.74	44586.1	24212.3	113.61	4.12	2.04	0.004662	2.33	0.0380456	1.6414	221.101	366.6	6.1
M221T507_1	340342	240750	117.86	1.84952e+06	1.83198e+06	56.24	0.18	-2.44	0.004662	2.33	0.0380456	1.54329	221.082	506.7	8.4
M221T507_2	431754	470576	41.36	291327	319353	39.85	1.48	0.57	0.0649573	1.19	0.207149	0.869103	221.118	507.2	8.5
M221T545	236779	157057	69.11	332735	387402	42.83	0.71	-0.49	0.130381	0.88	0.317655	0.901555	221.027	545.2	9.1
M221T57	2.03232e+06	1.83814e+06	43.62	2.18244e+06	2.15569e+06	74.53	0.93	-0.1	0.95913	0.02	0.981433	0.291386	220.938	56.5	0.9
M221T577	625595	506436	65.03	278425	263813	40.83	2.25	1.17	0.0010878	2.96	0.0151734	1.58257	221.082	576.8	9.6
M221T589	388804	488720	50.96	616273	632352	54.1	0.63	-0.66	0.194872	0.71	0.408126	0.846704	221.118	589.2	9.8
M221T610	1.43817e+06	1.30659e+06	43.21	1.14887e+06	1.05014e+06	82.84	1.25	0.32	0.278632	0.55	0.503994	0.72568	221.118	610.1	10.2
M221T620	287666	266104	27.5	298050	253045	61.89	0.97	-0.05	0.573737	0.24	0.759252	0.206905	221.082	619.6	10.3
M221T626	751487	705964	85.39	308485	270272	83.19	2.44	1.28	0.160528	0.79	0.36158	0.678673	221.118	625.8	10.4
M221T68	99609.9	103851	39.84	81047.2	81216.8	23.02	1.23	0.3	0.328205	0.48	0.552488	0.54818	221.018	67.6	1.1
M221T713	580996	565175	41.23	592832	634974	32.05	0.98	-0.03	0.573737	0.24	0.759252	0.0134523	221.154	713.4	11.9
M221T723	262515	208383	68.09	274561	195594	76.62	0.96	-0.06	0.878477	0.06	0.936588	0.0580014	220.984	722.6	12
M221T741	4.03785e+07	3.98109e+07	31.91	2.69915e+07	3.11111e+07	45.11	1.5	0.58	0.0829837	1.08	0.241068	1.07767	221.121	741.4	12.4
M221T784	429977	332573	47.88	392741	354369	58.57	1.09	0.13	0.441803	0.35	0.659657	0.446309	221.103	783.9	13.1
M221T826	4.92984e+06	5.29449e+06	60.89	4.82503e+06	5.36098e+06	54.16	1.02	0.03	0.720901	0.14	0.850988	0.0846139	221.154	826.1	13.8
M221T83	2.38283e+06	2.07254e+06	36.9	5.44123e+06	5.5289e+06	37	0.44	-1.19	0.004662	2.33	0.0380456	1.59795	220.87	83	1.4
M221T832	9.2472e+06	5.902e+06	80.8	7.50463e+06	7.39775e+06	56.42	1.23	0.3	0.505361	0.3	0.709443	0.370496	221.154	832.2	13.9
M222T108	1.07761e+06	1.09045e+06	33.95	1.15642e+06	1.21531e+06	47.08	0.93	-0.1	0.798446	0.1	0.895187	0.00658945	222.035	108.1	1.8
M222T122_2	3.14525e+06	3.03801e+06	19.42	2.87515e+06	3.05565e+06	18.46	1.09	0.13	0.573737	0.24	0.759252	0.582367	222.044	121.5	2
M222T151	4.70669e+06	4.33612e+06	56.36	3.49676e+06	3.71517e+06	36.7	1.35	0.43	0.382284	0.42	0.606076	0.688131	222.024	151.3	2.5
M222T174	132915	116466	56.16	220699	235484	53.34	0.6	-0.73	0.234499	0.63	0.4544	0.960107	222.077	173.9	2.9
M222T291	252291	243670	18.98	289926	275478	33.04	0.87	-0.2	0.878477	0.06	0.936588	0.382582	222.06	291.3	4.9
M222T335	93985	91972.7	37.26	55216.4	53649.4	15.42	1.7	0.77	0.0104118	1.98	0.0628046	1.41994	222.044	335.3	5.6
M222T336	46700.6	49496.1	52.43	97814.2	100340	14.44	0.48	-1.07	0.0003108	3.51	0.00655521	1.61214	222.097	336.1	5.6
M222T34	170963	178148	12.31	134448	140280	16.72	1.27	0.35	0.0104118	1.98	0.0628046	1.56488	221.842	33.7	0.6
M222T382	37487.2	27966.9	88.61	111642	100209	52.28	0.34	-1.57	0.0104118	1.98	0.0628046	1.62442	222.077	381.8	6.4
M222T409	1.53418e+06	208130	139.95	1.27056e+06	121819	163.67	1.21	0.27	0.441803	0.35	0.659657	0.402372	222.079	409.4	6.8
M222T432	761911	779596	49.73	1.31873e+06	712259	111.27	0.58	-0.79	0.878477	0.06	0.936588	0.237368	222.08	432.2	7.2
M222T507	116987	119496	58.59	94155.5	115926	60.35	1.24	0.31	0.645377	0.19	0.808158	0.392134	222.085	506.8	8.4
M222T54	396052	399900	9.78	341570	338394	14.31	1.16	0.21	0.014763	1.83	0.078691	1.30391	221.8	53.7	0.9
M222T648	132128	136937	48.17	93476.1	109859	51.31	1.41	0.5	0.194872	0.71	0.408126	0.701863	221.982	648.5	10.8
M222T741	3.85079e+06	3.89185e+06	43.3	1.59912e+06	1.19837e+06	65.05	2.41	1.27	0.0104118	1.98	0.0628046	1.46023	222.125	741.4	12.4
M222T752	1.76151e+06	1.98914e+06	56.34	549862	390858	81.27	3.2	1.68	0.00699301	2.16	0.0487438	1.54302	221.8	752.1	12.5
M222T92_1	801359	764482	22.45	663562	632511	13.05	1.21	0.27	0.0829837	1.08	0.241068	1.07482	222.037	92.4	1.5
M222T92_2	1.55015e+06	1.57019e+06	54.38	1.91641e+06	1.82528e+06	19.59	0.81	-0.31	0.720901	0.14	0.850988	0.829331	222.049	92.4	1.5
M222T95	2.75199e+06	2.08808e+06	85.75	5.45504e+06	6.0052e+06	47.49	0.5	-0.99	0.0649573	1.19	0.207149	1.26852	222.008	94.6	1.6
M223T100	2.06629e+06	1.97403e+06	68.19	1.71685e+06	1.4913e+06	54.52	1.2	0.27	0.382284	0.42	0.606076	0.0041024	223.101	100.4	1.7
M223T118	298290	265803	43.11	333635	290592	80.81	0.89	-0.16	0.798446	0.1	0.895187	0.0730098	223.047	117.5	2
M223T122_1	2.2288e+06	2.28726e+06	25.31	1.47146e+06	1.38458e+06	31.89	1.51	0.6	0.00699301	2.16	0.0487438	1.51281	223.028	122	2
M223T122_2	7.51789e+06	6.76718e+06	30.54	3.99908e+06	3.75904e+06	32.54	1.88	0.91	0.0018648	2.73	0.0213197	1.81051	223.075	121.9	2
M223T147	1.13516e+06	954407	45.42	824149	714071	41.87	1.38	0.46	0.104895	0.98	0.278831	0.882638	223.074	147.1	2.5
M223T151	595827	531220	27.84	491856	491642	14.52	1.21	0.28	0.234499	0.63	0.4544	0.974151	223.028	151.1	2.5
M223T203	298079	287522	29.94	306330	274349	32.49	0.97	-0.04	1	0	1	0.0714463	223.072	202.8	3.4
M223T432	104221	124566	55.4	103644	110118	38.22	1.01	0.01	0.798446	0.1	0.895187	0.230727	223.083	432.3	7.2
M223T445	869717	870047	28.21	800195	863840	33.36	1.09	0.12	0.878477	0.06	0.936588	0.381342	223.097	444.7	7.4
M223T583	1.26109e+06	1.19316e+06	24.09	865418	807672	51.52	1.46	0.54	0.0498834	1.3	0.173853	1.2728	223.028	583.2	9.7
M223T614	5.61581e+06	5.37558e+06	29.32	6.63086e+06	6.23101e+06	38.58	0.85	-0.24	0.505361	0.3	0.709443	0.38442	223.028	613.8	10.2
M223T651	451539	484451	46.7	576762	512297	78.48	0.78	-0.35	0.798446	0.1	0.895187	0.158106	223.133	650.5	10.8
M223T666	515183	417464	66.45	476978	471492	40.18	1.08	0.11	0.720901	0.14	0.850988	0.107497	223.133	666.1	11.1
M223T697	449885	466692	44.21	442289	423062	47.47	1.02	0.02	0.798446	0.1	0.895187	0.132757	223	696.8	11.6
M223T741	908646	968344	34.09	858994	820978	17.68	1.06	0.08	0.328205	0.48	0.552488	0.0797182	223.118	741.4	12.4
M223T742	4.9221e+06	4.55517e+06	50.99	1.74093e+06	1.50121e+06	52.87	2.83	1.5	0.0010878	2.96	0.0151734	1.76335	223.028	742.4	12.4
M223T744	2.95462e+06	1.59815e+06	99.59	3.69015e+06	2.73772e+06	66.19	0.8	-0.32	0.328205	0.48	0.552488	0.580913	223.17	743.7	12.4
M223T752	1.15963e+06	1.08221e+06	71.4	1.06933e+06	631908	86.67	1.08	0.12	0.878477	0.06	0.936588	0.347356	223.134	752.2	12.5
M223T767	1.87378e+06	2.0746e+06	42.68	2.69565e+06	2.19786e+06	63.78	0.7	-0.52	0.382284	0.42	0.606076	0.610523	223.134	767.1	12.8
M223T82	1.72544e+06	1.7882e+06	20.32	1.66886e+06	1.68472e+06	12.82	1.03	0.05	0.505361	0.3	0.709443	0.137214	222.999	82.3	1.4
M223T98	1.4107e+06	1.23081e+06	45.91	1.37889e+06	1.22443e+06	39.75	1.02	0.03	0.95913	0.02	0.981433	0.0431959	223.039	97.8	1.6
M224T102	300205	296067	22.09	182259	130303	98.35	1.65	0.72	0.328205	0.48	0.552488	1.12521	224.103	101.7	1.7
M224T115	7.36665e+06	6.88576e+06	54.64	3.94893e+06	4.25793e+06	39.76	1.87	0.9	0.0379176	1.42	0.147066	0.926948	224.058	114.7	1.9
M224T122	1.47524e+06	1.30803e+06	41.99	2.15385e+06	2.69607e+06	44.66	0.68	-0.55	0.160528	0.79	0.36158	0.763653	224.023	121.9	2
M224T149_1	74537.2	68930.7	72.25	83174.8	100105	55.55	0.9	-0.16	0.878477	0.06	0.936588	0.25808	223.964	148.6	2.5
M224T149_2	160864	139735	53.51	250764	138784	96.25	0.64	-0.64	1	0	1	0.358663	224.078	148.8	2.5
M224T287	261156	257548	11.68	245682	238261	9.88	1.06	0.09	0.382284	0.42	0.606076	0.67864	224.005	287.1	4.8
M224T331	35771.9	33834.8	27.24	20413.3	22789.4	33.47	1.75	0.81	0.0018648	2.73	0.0213197	1.62053	224.104	330.9	5.5
M224T387	80102.9	84380.7	25.87	80411.8	69763.1	34.25	1	-0.01	0.878477	0.06	0.936588	0.0531367	224.042	387.3	6.5
M224T39	474197	460548	16.52	546676	415753	52.19	0.87	-0.21	0.720901	0.14	0.850988	0.350303	223.798	39.1	0.7
M224T397	46157.6	46613.9	13.52	44970	46039.2	20.2	1.03	0.04	0.878477	0.06	0.936588	0.316407	224.112	397.1	6.6
M224T432	38187.6	28418.9	85.75	253.11	150	90.8	150.88	7.24	0.0010878	2.96	0.0151734	2.00293	224.076	432.3	7.2
M224T445	281898	302781	26.51	236425	238199	45.07	1.19	0.25	0.234499	0.63	0.4544	0.657543	224.006	445.3	7.4
M224T487	212004	228723	43.16	138094	134980	49.65	1.54	0.62	0.0829837	1.08	0.241068	0.962031	224.048	486.5	8.1
M224T54	544031	544639	6.63	409397	432858	13.68	1.33	0.41	0.0001554	3.81	0.00449411	1.93088	223.798	53.8	0.9
M224T544	350353	377826	44.42	148974	129969	53.85	2.35	1.23	0.0104118	1.98	0.0628046	1.54693	224.129	543.5	9.1
M224T554	75039.3	35207.9	116.13	76576.5	75561.3	68.72	0.98	-0.03	0.505361	0.3	0.709443	0.491995	224.093	554.1	9.2
M224T562	60979.9	66939.4	43.94	27634.9	22790	87.37	2.21	1.14	0.0206682	1.68	0.0984557	1.46891	224.056	561.7	9.4
M224T583	302540	264539	46.82	132926	119172	47.36	2.28	1.19	0.014763	1.83	0.078691	1.59307	224.028	583.2	9.7
M224T614	442479	378854	34.09	533339	514392	18.84	0.83	-0.27	0.0649573	1.19	0.207149	0.92196	224.028	613.8	10.2
M224T69	419285	430304	25.14	409482	399108	12.97	1.02	0.03	0.573737	0.24	0.759252	0.0413609	224.027	68.5	1.1
M224T747	98855	99512.1	51.44	21543.1	17479.6	62.33	4.59	2.2	0.0010878	2.96	0.0151734	1.87703	224.166	747	12.4
M224T753	8.80995e+06	8.24051e+06	46.65	7.33428e+06	2.68661e+06	129.62	1.2	0.26	0.130381	0.88	0.317655	0.893977	223.798	752.7	12.5
M224T759	6.86547e+06	7.14251e+06	69.8	5.40064e+06	4.57119e+06	66.82	1.27	0.35	0.720901	0.14	0.850988	0.374655	224.028	758.6	12.6
M224T78	3.04108e+07	2.67851e+07	41.68	2.98553e+07	2.66733e+07	33.2	1.02	0.03	0.878477	0.06	0.936588	0.0354489	224.023	77.6	1.3
M224T82	652814	624883	18.43	622576	631193	7.7	1.05	0.07	0.720901	0.14	0.850988	0.2109	224.056	81.5	1.4
M225T315	39593.8	49141.7	71.2	56787.7	56038.6	45.69	0.7	-0.52	0.328205	0.48	0.552488	0.742673	225.034	314.7	5.2
M225T378	153935	151688	25.77	69451.7	70956.1	26.12	2.22	1.15	0.0001554	3.81	0.00449411	1.98615	225.088	377.7	6.3
M225T424	69366.2	61768.1	68.03	77127.3	61171.2	72.31	0.9	-0.15	0.798446	0.1	0.895187	0.0144147	225.023	423.7	7.1
M225T454	30080.6	22149.1	125.04	96256.7	85763.8	44.11	0.31	-1.68	0.00699301	2.16	0.0487438	1.54973	225.007	454.4	7.6
M225T515	44421.7	48417	21.93	40373.3	42819.4	33.04	1.1	0.14	0.505361	0.3	0.709443	0.463964	225.007	514.9	8.6
M225T518	270701	212401	83.6	314340	316535	67.48	0.86	-0.22	0.573737	0.24	0.759252	0.144614	225.149	518.1	8.6
M225T527	344346	363302	36.62	325133	309116	19.96	1.06	0.08	0.505361	0.3	0.709443	0.0280915	225.076	526.7	8.8
M225T535	198648	185067	36.08	389076	356344	78.1	0.51	-0.97	0.382284	0.42	0.606076	0.688174	224.979	535.1	8.9
M225T614_1	78625.6	67223.9	51.71	48803	44095.8	43.49	1.61	0.69	0.0498834	1.3	0.173853	1.18816	225.007	614	10.2
M225T614_2	657628	612823	72.74	302764	233818	61.79	2.17	1.12	0.130381	0.88	0.317655	0.971102	225.025	613.9	10.2
M225T619	1.62376e+06	1.68751e+06	31.87	1.36763e+06	1.45064e+06	31.1	1.19	0.25	0.194872	0.71	0.408126	0.528426	225.149	618.8	10.3
M225T633	235859	202168	44.82	307259	186672	111.79	0.77	-0.38	0.720901	0.14	0.850988	0.386929	225.092	632.9	10.5
M225T69_1	453132	470104	31.52	333401	232391	69.32	1.36	0.44	0.441803	0.35	0.659657	0.848806	224.971	69.1	1.2
M225T69_2	3.53677e+06	3.48207e+06	18.93	2.66687e+06	2.82774e+06	22.1	1.33	0.41	0.0206682	1.68	0.0984557	1.38668	225.007	69.1	1.2
M225T703	552691	561313	22.87	502306	551250	40.92	1.1	0.14	0.720901	0.14	0.850988	0.451853	225.092	703.1	11.7
M225T710	1.14634e+06	988239	59.17	454217	398292	64.51	2.52	1.34	0.014763	1.83	0.078691	1.37114	225.149	709.9	11.8
M225T727	1.13261e+06	1.06839e+06	25.36	1.14875e+06	1.20414e+06	29.89	0.99	-0.02	0.798446	0.1	0.895187	0.00323911	224.979	727.5	12.1
M225T759	4.66453e+06	4.61371e+06	24.26	5.30062e+06	5.60308e+06	22.72	0.88	-0.18	0.382284	0.42	0.606076	0.684604	225.025	758.6	12.6
M225T77	1.06296e+06	1.01208e+06	43.41	707967	689239	19.52	1.5	0.59	0.104895	0.98	0.278831	1.18538	225.027	77.3	1.3
M225T83	4.76177e+06	4.96047e+06	18.34	3.93978e+06	3.95248e+06	27.3	1.21	0.27	0.104895	0.98	0.278831	1.04463	224.819	82.6	1.4
M225T84	2.17313e+07	2.23743e+07	19.28	1.81844e+07	1.79837e+07	6.65	1.2	0.26	0.104895	0.98	0.278831	1.26977	225.061	84.4	1.4
M225T85	1.00093e+07	1.11836e+07	32.79	1.37038e+07	1.36547e+07	17.27	0.73	-0.45	0.00699301	2.16	0.0487438	1.01346	224.998	84.5	1.4
M225T90	1.43139e+07	1.44104e+07	4.59	1.31015e+07	1.35915e+07	12.11	1.09	0.13	0.104895	0.98	0.278831	1.1696	225.061	89.8	1.5
M225T93	5.7361e+07	5.91274e+07	30.97	6.73914e+07	6.5945e+07	30.29	0.85	-0.23	0.234499	0.63	0.4544	0.524767	225.099	93.3	1.6
M226T214	1.32948e+06	1.40618e+06	24.65	1.34462e+06	1.46803e+06	21.33	0.99	-0.02	0.798446	0.1	0.895187	0.0837054	226.083	213.6	3.6
M226T290	274383	250612	41.65	321209	238742	66.58	0.85	-0.23	0.95913	0.02	0.981433	0.0919635	225.985	289.7	4.8
M226T315	608870	667006	21.39	303903	295870	15.99	2	1	0.0003108	3.51	0.00655521	2.06542	226.083	314.7	5.2
M226T323	367406	391703	58.81	89149.7	80478.9	64.56	4.12	2.04	0.0104118	1.98	0.0628046	1.58312	226.083	323.4	5.4
M226T355	247254	256626	52.47	230862	214168	46.14	1.07	0.1	0.720901	0.14	0.850988	0.0428403	226.108	355.2	5.9
M226T372	1.17515e+06	1.114e+06	50.41	1.26301e+06	1.33492e+06	56.99	0.93	-0.1	0.798446	0.1	0.895187	0.194404	226.108	371.9	6.2
M226T407	1.18603e+07	8.05148e+06	61.97	2.34019e+07	1.88999e+07	79.51	0.51	-0.98	0.278632	0.55	0.503994	0.852277	226.108	407.4	6.8
M226T419	697167	688727	49.26	581654	568251	34.89	1.2	0.26	0.278632	0.55	0.503994	0.0169746	226.028	418.7	7
M226T439	38883.7	36506.6	40.4	24910.9	23714.7	26.68	1.56	0.64	0.0498834	1.3	0.173853	1.20046	226.036	439.2	7.3
M226T448	81627.3	83106.5	72.13	25173.6	12921.7	117.65	3.24	1.7	0.0281274	1.55	0.119973	1.25565	226.072	448.1	7.5
M226T449	189997	132099	104.27	87800.9	57594.8	83.4	2.16	1.11	0.160528	0.79	0.36158	0.828512	226.054	448.9	7.5
M226T485	69568.2	60060.8	58.13	106959	74394.3	77.23	0.65	-0.62	0.328205	0.48	0.552488	0.473275	226.145	484.6	8.1
M226T487	109606	107447	66.11	65642.1	65179.6	43.36	1.67	0.74	0.328205	0.48	0.552488	0.581039	226.046	486.6	8.1
M226T525	131284	133628	18.45	119589	114857	23.3	1.1	0.13	0.645377	0.19	0.808158	0.595005	226.117	525.4	8.8
M226T54	342719	209998	64.37	295482	210934	74.78	1.16	0.21	0.645377	0.19	0.808158	0.334593	225.796	53.6	0.9
M226T565	108315	102682	71.28	41394.5	28598.5	74.05	2.62	1.39	0.0281274	1.55	0.119973	1.31103	226.145	564.7	9.4
M226T688	114040	82624.8	87.9	108165	67353.6	82.5	1.05	0.08	0.720901	0.14	0.850988	0.193579	226.128	688.2	11.5
M226T723	229351	250179	38.17	572372	631252	35.73	0.4	-1.32	0.00699301	2.16	0.0487438	1.52694	225.796	722.5	12
M226T752	1.17994e+06	1.22828e+06	32.92	1.26874e+06	1.19786e+06	28.97	0.93	-0.1	0.505361	0.3	0.709443	0.319982	225.796	751.8	12.5
M226T81	1.29432e+06	1.31701e+06	21.16	1.23098e+06	1.30137e+06	17.86	1.05	0.07	0.720901	0.14	0.850988	0.279474	226.039	81.5	1.4
M226T82	5.35002e+06	5.27096e+06	37.32	3.76433e+06	3.72362e+06	13.29	1.42	0.51	0.0649573	1.19	0.207149	1.04988	225.986	82.1	1.4
M226T90_1	428946	425472	12.18	506829	506262	6.15	0.85	-0.24	0.00699301	2.16	0.0487438	1.55338	226.012	90.3	1.5
M226T90_2	1.76513e+06	1.80971e+06	13.27	1.43213e+06	1.399e+06	22.95	1.23	0.3	0.0649573	1.19	0.207149	1.30955	226.065	89.6	1.5
M226T95	2.9269e+06	3.25715e+06	65.6	2.11307e+06	2.45903e+06	59.73	1.39	0.47	0.234499	0.63	0.4544	0.437769	226.039	95.3	1.6
M227T108	4.54016e+07	4.72901e+07	27.94	4.69628e+07	4.98294e+07	38.16	0.97	-0.05	0.798446	0.1	0.895187	0.0154098	226.996	107.6	1.8
M227T115	1.54036e+06	1284070	47.83	2.87732e+06	1.87845e+06	85.75	0.54	-0.9	0.382284	0.42	0.606076	0.630873	227.115	115.1	1.9
M227T117	394932	358667	37.37	291792	323398	27.29	1.35	0.44	0.194872	0.71	0.408126	0.996118	226.978	116.7	1.9
M227T126	3.31122e+06	3.53459e+06	38.31	2.19979e+06	1.97226e+06	48.32	1.51	0.59	0.234499	0.63	0.4544	1.09325	227.086	125.7	2.1
M227T154	1.72449e+06	1.84156e+06	38.38	1.63299e+06	1.6946e+06	22.79	1.06	0.08	0.505361	0.3	0.709443	0.0616611	227.067	153.6	2.6
M227T163	499020	459244	19.53	469808	474543	13.77	1.06	0.09	1	0	1	0.403915	227.067	163.1	2.7
M227T224	997382	1.16027e+06	69.88	772942	1.00518e+06	61.86	1.29	0.37	0.194872	0.71	0.408126	0.11292	227.067	223.6	3.7
M227T244	371437	376408	6.72	373463	377745	5.52	0.99	-0.01	0.878477	0.06	0.936588	0.17002	227.092	243.8	4.1
M227T283	120254	130850	56.92	89411.3	94864.8	58.24	1.34	0.43	0.234499	0.63	0.4544	0.444857	227.14	282.7	4.7
M227T354	1.11973e+06	1.08586e+06	27.53	1.17215e+06	1.1959e+06	14.02	0.96	-0.07	0.505361	0.3	0.709443	0.376699	227.013	354.3	5.9
M227T374	372861	399642	40	386042	380515	25.01	0.97	-0.05	0.95913	0.02	0.981433	0.270448	227.092	374.1	6.2
M227T393	152163	146524	23.78	98630.3	94949.6	19.75	1.54	0.63	0.0018648	2.73	0.0213197	1.68719	227.045	393	6.6
M227T419	37230	35933.6	10.07	41680.8	43287.4	21.2	0.89	-0.16	0.441803	0.35	0.659657	0.642724	227.031	418.6	7
M227T431	175226	185586	66.78	147127	140572	67.63	1.19	0.25	0.645377	0.19	0.808158	0.0129361	227.092	431.2	7.2
M227T482	29002.1	32289.5	57.35	27209.5	24474.8	56.49	1.07	0.09	0.798446	0.1	0.895187	0.121945	227.038	482.3	8
M227T483	3.51166e+06	3.20126e+06	30.66	4.29719e+06	4.34387e+06	53.07	0.82	-0.29	0.278632	0.55	0.503994	0.0629374	227.129	482.9	8
M227T532	1.00699e+06	774341	77.49	2.34081e+06	1.63654e+06	98.56	0.43	-1.22	0.0281274	1.55	0.119973	1.21198	227.129	531.7	8.9
M227T547	1.73483e+06	1.81433e+06	32.8	2.17734e+06	2.15088e+06	29.84	0.8	-0.33	0.194872	0.71	0.408126	0.809064	227.129	547.4	9.1
M227T674	1.06936e+06	973044	71.23	543594	536828	40.15	1.97	0.98	0.234499	0.63	0.4544	0.937837	227.129	673.7	11.2
M227T69	443476	369001	42.47	884498	879103	36.73	0.5	-1	0.004662	2.33	0.0380456	1.58569	226.987	69.3	1.2
M227T70	721452	766328	18.94	813352	808876	28.53	0.89	-0.17	0.278632	0.55	0.503994	0.382812	227.018	70	1.2
M227T758	2.0699e+06	1.66865e+06	80.03	2.56937e+06	2.60813e+06	22.73	0.81	-0.31	0.160528	0.79	0.36158	0.929707	226.978	757.8	12.6
M227T762	4.59053e+06	4.96112e+06	28.8	3.09284e+06	3.13576e+06	39.31	1.48	0.57	0.0379176	1.42	0.147066	1.09077	227.165	761.9	12.7
M227T814	2.09284e+06	1.28339e+06	78.25	1.77702e+06	1.51435e+06	42.37	1.18	0.24	0.720901	0.14	0.850988	0.0416188	227.201	814.3	13.6
M227T83	5.26818e+06	6.22517e+06	54.54	6.31295e+06	6.39613e+06	21.69	0.83	-0.26	0.505361	0.3	0.709443	0.706493	226.816	82.6	1.4
M227T90_1	596570	483033	39.3	1.18814e+06	1.15968e+06	28.22	0.5	-0.99	0.000621601	3.21	0.0104451	1.75739	226.966	89.9	1.5
M228T108	3.67311e+06	3.63923e+06	11.07	3.01882e+06	3.2535e+06	24.27	1.22	0.28	0.0649573	1.19	0.207149	1.23941	228	107.6	1.8
M228T114	2.09483e+06	2.08925e+06	4.14	1.55196e+06	1.4955e+06	40.99	1.35	0.43	0.104895	0.98	0.278831	1.14807	228.099	113.6	1.9
M228T115	142781	137542	23.76	140991	137456	17.16	1.01	0.02	1	0	1	0.0349141	228.118	115.1	1.9
M228T118	628017	594177	47.28	503914	490373	18.52	1.25	0.32	0.382284	0.42	0.606076	0.493608	228.018	118.4	2
M228T212	1.01214e+06	1.08172e+06	43.55	1.11537e+06	1.2512e+06	40.9	0.91	-0.14	0.382284	0.42	0.606076	0.103938	228.052	212.4	3.5
M228T256	67384.7	48442.7	73.16	180372	182974	50.22	0.37	-1.42	0.00699301	2.16	0.0487438	1.38741	228.045	255.9	4.3
M228T31	39253	28876.4	61.98	19936.8	18936.7	12.13	1.97	0.98	0.014763	1.83	0.078691	1.3116	227.96	31.2	0.5
M228T32	59841.1	53545	61.02	49761.8	41635.3	89.49	1.2	0.27	0.382284	0.42	0.606076	0.573346	227.937	31.6	0.5
M228T363	873860	886419	25.95	355424	357794	9.95	2.46	1.3	0.0001554	3.81	0.00449411	2.14895	228	363.1	6.1
M228T374_1	220433	256100	62.52	403641	446628	35.95	0.55	-0.87	0.0379176	1.42	0.147066	0.97672	228.033	373.6	6.2
M228T391	299150	312937	31.36	276685	251446	40.02	1.08	0.11	0.645377	0.19	0.808158	0.335598	228.124	390.6	6.5
M228T407	101837	96844.7	58.84	75963.9	82675.6	45.64	1.34	0.42	0.441803	0.35	0.659657	0.484334	228.114	407.4	6.8
M228T419	149284	153574	13.06	81017.7	81276.6	55.28	1.84	0.88	0.0018648	2.73	0.0213197	1.46925	228.025	418.7	7
M228T457	93853.1	88835	50.92	23639.1	20711	64.35	3.97	1.99	0.0029526	2.53	0.0288032	1.68768	228.088	457	7.6
M228T483	874617	677252	91.98	187680	147688	90.25	4.66	2.22	0.0010878	2.96	0.0151734	1.66263	228.132	482.7	8
M228T547_1	307041	278231	42.88	259548	147238	84.14	1.18	0.24	0.328205	0.48	0.552488	0.627159	228.132	547.5	9.1
M228T559	118042	120060	12.83	109623	98082.7	37.81	1.08	0.11	0.328205	0.48	0.552488	0.468666	228.103	558.8	9.3
M228T625	85723.6	95204.2	38.38	54784.8	43624.8	46	1.56	0.65	0.0829837	1.08	0.241068	1.12484	228.066	624.9	10.4
M228T674	72809.8	80035.1	42.58	66352.5	73467.6	39.12	1.1	0.13	0.505361	0.3	0.709443	0.264844	228.132	673.7	11.2
M228T80	2.0251e+07	2.13988e+07	23.47	1.91751e+07	2.02652e+07	30.07	1.06	0.08	1	0	1	0.388782	228.064	80.4	1.3
M228T82	2.17238e+06	1.45373e+06	75.48	1.28474e+06	1.18683e+06	24.61	1.69	0.76	0.441803	0.35	0.659657	0.790389	227.983	81.9	1.4
M228T92	3.44045e+06	3.41351e+06	16.39	2.93381e+06	2.88555e+06	26.1	1.17	0.23	0.160528	0.79	0.36158	0.987684	228.064	92.1	1.5
M228T94	523590	514705	7.09	527212	506133	6.9	0.99	-0.01	0.878477	0.06	0.936588	0.0357227	228.01	94.2	1.6
M228T95	2.42749e+06	2.48493e+06	21.96	2.25937e+06	2.32641e+06	15.81	1.07	0.1	0.278632	0.55	0.503994	0.432893	228.038	95.1	1.6
M228T98	1.21319e+06	1.30641e+06	48.94	1.16308e+06	1.33037e+06	47.93	1.04	0.06	0.95913	0.02	0.981433	0.0486166	228.051	97.9	1.6
M229T108	1.78385e+07	1.62311e+07	36.31	3.74658e+07	3.14508e+07	45.81	0.48	-1.07	0.00699301	2.16	0.0487438	1.60329	228.994	107.6	1.8
M229T112	234075	186264	48.37	218501	158490	70.77	1.07	0.1	0.720901	0.14	0.850988	0.32948	229.13	111.9	1.9
M229T114	231645	169982	86.97	178000	131652	72.74	1.3	0.38	0.798446	0.1	0.895187	0.361193	229.102	113.7	1.9
M229T126	246895	246170	17.41	182353	214727	46.89	1.35	0.44	0.160528	0.79	0.36158	0.985936	229.083	126	2.1
M229T149_1	649451	734475	30.06	752668	731271	13.28	0.86	-0.21	0.645377	0.19	0.808158	0.703544	229.054	149.5	2.5
M229T212	83831.5	75189.8	35.92	49388.5	45512.6	42.53	1.7	0.76	0.0379176	1.42	0.147066	1.51742	229.055	212.4	3.5
M229T222	122272	126421	23.82	128813	128324	9.86	0.95	-0.08	0.645377	0.19	0.808158	0.446033	229.029	222.2	3.7
M229T304	101544	93988.4	74.03	257657	243710	21.17	0.39	-1.34	0.0003108	3.51	0.00655521	1.55273	229.119	303.8	5.1
M229T34	141440	145695	11.45	127691	131903	7.01	1.11	0.15	0.160528	0.79	0.36158	1.11614	228.994	33.5	0.6
M229T347	141574	115993	53.28	95095.3	70379.6	66.52	1.49	0.57	0.160528	0.79	0.36158	0.861204	229.156	346.5	5.8
M229T374	58716.3	21436.9	118.22	142832	170508	49.5	0.41	-1.28	0.014763	1.83	0.078691	1.19477	229.108	374.1	6.2
M229T527	153405	157444	50.36	18306	15986.9	80.16	8.38	3.07	0.0003108	3.51	0.00655521	1.95771	229.098	527.2	8.8
M229T529	1.67233e+06	1.6e+06	15.75	1.41863e+06	1.38684e+06	8.33	1.18	0.24	0.0281274	1.55	0.119973	1.34331	229.144	529.3	8.8
M229T537	181729	113146	78.5	270845	205269	79.78	0.67	-0.58	0.278632	0.55	0.503994	0.67818	229.164	536.5	8.9
M229T544	1.01166e+06	1.01759e+06	29.65	1.16041e+06	1.12886e+06	38.35	0.87	-0.2	0.573737	0.24	0.759252	0.328116	229.144	544.2	9.1
M229T616	100374	91417.8	56.81	126213	124594	51.01	0.8	-0.33	0.505361	0.3	0.709443	0.466727	229.09	616.5	10.3
[truncated: 10,234 more rows]
