# Supplementary material for: The impact of dapagliflozin for the myocardial metabolomic profiles of mice with chronic heart failure induced by a high fat diet
Source: Research Square preprint supplement (doi:10.21203/rs.3.rs-6881055/v1), 2025-06-25
Supplement: Supplementary file 5 [file 2dd344213a57b4974a79ff09.xlsx]

## Sheet: 代谢物一二级鉴定定量总表
First-level name	Name	Mass-to-charge ratio	Retention times(min)	Exact_mass	Molecular weight error(ppm)	Formula	Precursor_type	Class	Sub_class	KEGG	KEGG_Pathway	CAS serial number	HMDB serial number	Library	Level	Detection mode	Chow1	Chow2	Chow3	Chow4	Chow5	Chow6	Chow7	Chow8	HDF1	HDF3	HDF4	HDF5	HDF6	HDF7	HDF8	DAPA1	DAPA2	DAPA3	DAPA4	DAPA6	DAPA7	DAPA8	DAPA5	HDF2
M516T594_1	Ciliatocholate	516.296	594	515.301	23.5828	C26H46NO7P	[M+H]+	Carboxylic acids and derivatives	Alcohols and polyols	C05683	Metabolism of other amino acids	13222-48-5		MetaDNA	2	pos	2.73687e+06	4.29357e+06	1.59609e+06	1.67385e+06	2.36206e+06	1.28601e+06	4.19039e+06	2.93642e+06	1.89809e+06	4.48035e+06	3.17654e+06	5.22914e+06	2.30492e+06	4.52381e+06	5.66181e+06	645845	4.73203e+06	7.65554e+06	1.86996e+06	1.63482e+06	1.57509e+06	4.92846e+06	6.75339e+06	4.78319e+06
M614T121	Cytidine monophosphate N-acetylneuraminic acid	614.145	121.5	614.147	3.09372	C20H31N4O16P	[M]+	Azacyclic compounds	Alcohols and polyols	C00128	Carbohydrate metabolism; Glycan biosynthesis and metabolism; Global and overview maps	22-12-8/3063-71-6	HMDB0001176	MetaDNA	2	pos	3.3748e+07	1.91871e+07	2.75689e+07	2.97482e+07	1.74862e+07	1.21979e+07	2.929e+07	3.03583e+07	4.8565e+07	3.91761e+07	4.38028e+07	3.99283e+07	2.7545e+07	2.77986e+07	4.13925e+07	2.51924e+07	4.29077e+07	3.18323e+07	2.41504e+07	4.26359e+07	4.00821e+07	3.41462e+07	2.52926e+07	3.68274e+07
M447T89	CDP-Ethanolamine	447.067	89	446.06	2.18311	C11H20N4O11P2	[M+H]+	Azacyclic compounds	Alcohols and polyols	C00570	Lipid metabolism; Global and overview maps	3036-18-8	HMDB0001564	MetaDNA	2	pos	6.08662e+06	8.6179e+06	7.3106e+06	6.6689e+06	6.15266e+06	6.42412e+06	6.91895e+06	6.11513e+06	4.49816e+06	7.13522e+06	5.10106e+06	7.46227e+06	6.5391e+06	4.59963e+06	4.83809e+06	1.04026e+07	584343	8.46759e+06	5.79467e+06	3.76336e+06	844741	918144	5.96972e+06	1.14928e+07
M161T77	N(6)-Methyllysine	161.128	77.1	160.121	0.471673	C7H16N2O2	[M+H]+	Carboxylic acids and derivatives	Amines	C02728		1188-07-4/7622-29-9	HMDB0002038	MetaDNA	2	pos	8.89587e+06	3.68438e+06	4.57719e+06	7.15623e+06	9.81264e+06	2.63269e+06	5.98138e+06	7.6819e+06	9.38246e+06	1.01706e+07	1.09879e+07	4.14137e+06	1.18937e+07	9.52519e+06	1.37556e+07	9.91666e+06	4.61114e+06	9.6962e+06	1.12185e+07	1.46736e+07	8.50299e+06	2.63944e+06	5.35615e+06	1.29601e+07
M626T712_2	Leukotriene C4	626.314	711.6	625.303	5.78627	C30H47N3O9S	[M+H]+	Carboxylic acids and derivatives	Alcohols and polyols	C02166	Nervous system; Digestive system; Lipid metabolism; Signaling molecules and interaction; Immune disease; Immune system; Global and overview maps	72025-60-6		MetaDNA	2	pos	2.01919e+06	4.39573e+06	2.41389e+06	5.03876e+06	5.84693e+06	2.47687e+06	5.99002e+06	5.76485e+06	5.07787e+06	1.85221e+06	5.08023e+06	2.1756e+06	1.93916e+06	5.63487e+06	8.59045e+06	2.67774e+06	7.86594e+06	6.73169e+06	6.82665e+06	6.94174e+06	4.64351e+06	2.32373e+06	2.13436e+06	2.93591e+06
M237T341	L-Formylkynurenine	237.087	341.3	236.08	1.78837	C11H12N2O4	[M+H]+	Benzene and substituted derivatives	Amines	C02700	Amino acid metabolism; Global and overview maps	1022-31-7	HMDB0060485	MetaDNA	2	pos	3.43596e+06	2.88951e+06	3.817e+06	4.36511e+06	2.25072e+06	5.23464e+06	3.68626e+06	3.30123e+06	3.16621e+06	7.31e+06	6.65658e+06	4.75974e+06	5.15163e+06	5.10912e+06	7.73384e+06	4.89936e+06	7.15387e+06	6.30411e+06	4.0895e+06	5.16644e+06	8.04951e+06	8.17792e+06	9.50939e+06	9.19236e+06
M357T706	3-Oxo-5beta-cholanate	357.275	705.6	374.282	0.934855	C24H38O3	[M+H-H2O]+	Carboxylic acids and derivatives	Bile acids, alcohols and derivatives	C03070		1553-56-6		MetaDNA	2	pos	541808	500333	714826	846362	492616	325777	607937	882794	801752	720976	853943	964557	920386	809804	472013	1.14357e+06	745736	499114	442764	766206	702337	745532	639102	856548
M175T103_1	Formiminoglutamic acid	175.071	103.4	174.064	0.137087	C6H10N2O4	[M+H]+	Carboxylic acids and derivatives	Amidines	C00439	Amino acid metabolism; Global and overview maps	816-90-0	HMDB0000854	MetaDNA	2	pos	1.58128e+07	1.2692e+07	1.89552e+07	1.78932e+07	1.63208e+07	1.60635e+07	1.97253e+07	1.84333e+07	1.68284e+07	1.54187e+07	1.8703e+07	1.385e+07	1.82038e+07	1.29471e+07	1.37506e+07	1.85277e+07	1.45535e+07	1.91704e+07	1.39901e+07	1.63399e+07	1.79596e+07	1.5628e+07	1.47312e+07	1.72661e+07
M600T755_2	5-Oxoavermectin ''2a'' aglycone	600.333	755.4	600.33	4.6641	C34H48O9	[M]+			C11970	Metabolism of terpenoids and polyketides			MetaDNA	2	pos	3.09321e+06	1.5417e+07	9.47997e+06	4.33823e+06	2.03056e+07	1.51862e+07	1.04165e+07	1.05043e+07	9.6334e+06	2.3725e+07	1.11238e+07	1.61689e+07	1.8262e+07	1.85518e+07	2.11865e+07	6.79707e+06	2.05068e+07	7.70701e+06	2.06397e+07	1.79179e+07	1.69341e+07	1.50627e+07	1.38632e+07	2.39899e+07
M513T785_1	L-Oleandrosyl-oleandolide	513.317	785.3	530.309	29.4836	C27H46O10	[M+H-H2O]+	Carboxylic acids and derivatives	Alcohols and polyols	C11992	Global and overview maps; Metabolism of terpenoids and polyketides			MetaDNA	2	pos	1.24781e+07	1.29346e+07	3.53733e+07	6.01384e+07	1.30928e+07	2.20236e+07	1.281e+08	7.53926e+07	2.79455e+07	3.41691e+07	5.04351e+07	1.43147e+07	5.23459e+07	2.35286e+07	2.12161e+07	7.3268e+07	1.96654e+07	6.00142e+07	2.23068e+07	8.27453e+07	7.77521e+06	6.64399e+06	4.5943e+07	3.50891e+07
M572T828	6,8a-Seco-6,8a-deoxy-5-oxoavermectin ''2b'' aglycone	572.345	828.1	572.335	17.8217	C33H48O8	[M]+			C11953	Metabolism of terpenoids and polyketides			MetaDNA	2	pos	2.31618e+07	1.90223e+07	2.9264e+07	1.8034e+07	1.8153e+07	1.2331e+07	2.59091e+07	3.82444e+07	1.1841e+07	2.10708e+07	2.42647e+07	1.70483e+07	3.56276e+07	3.18568e+07	1.70688e+06	2.85688e+07	1.76378e+07	2.00672e+07	2.01774e+07	2.57274e+07	3.29908e+07	2.76744e+07	2.51561e+07	5.49056e+06
M585T758	Avermectin A2b aglycone	585.344	757.6	602.346	10.8211	C34H50O9	[M+H-H2O]+	Carboxylic acids and derivatives	Alcohols and polyols	C11956	Metabolism of terpenoids and polyketides			MetaDNA	2	pos	8.06866e+06	4.92122e+06	6.70765e+06	8.73105e+06	4.79801e+06	8.28484e+06	1.06085e+07	9.88125e+06	8.95215e+06	9.45069e+06	9.92482e+06	5.79656e+06	5.97413e+06	5.05159e+06	4.0703e+06	7.84007e+06	9.94803e+06	6.22496e+06	9.4701e+06	1.06226e+07	1.03883e+07	1.00435e+07	5.74718e+06	5.4059e+06
M164T707	Acetylcysteine	164.042	706.7	163.03	28.7975	C5H9NO3S	[M+H]+	Carboxylic acids and derivatives	Amino acids, peptides, and analogues	C06809		616-91-1	HMDB0001890	BioDeepDB	2	pos	3.32123e+06	4.71861e+06	7.64462e+06	2.8893e+06	3.51678e+06	3.45137e+06	3.37031e+06	4.82366e+06	4.41464e+06	3.17565e+06	3.04542e+06	3.96863e+06	745520	6.2588e+06	7.18213e+06	5.0279e+06	7.39968e+06	5.31486e+06	6.01255e+06	6.56062e+06	6.86776e+06	4.85459e+06	4.33757e+06	5.65522e+06
M171T65	Dihydroxyacetone phosphate	171.148	65.3	169.998	4.81539	C3H7O6P	[M+H]+	Organooxygen compounds	Carbohydrates and carbohydrate conjugates	C00111	Metabolism of cofactors and vitamins; Carbohydrate metabolism; Lipid metabolism; Energy metabolism; Global and overview maps	57-04-5	HMDB0001473	BioDeepDB	2	pos	2.50406e+07	2.00944e+07	1.70412e+07	2.33338e+07	1.71891e+07	2.36283e+07	3.17517e+07	3.34805e+07	1.64863e+07	3.37443e+07	4.24451e+07	2.13393e+07	2.46787e+07	2.27574e+07	3.8651e+07	2.62002e+07	2.35153e+07	2.17168e+07	2.87457e+07	2.79419e+07	2.13075e+07	3.61258e+07	2.04312e+07	2.98039e+07
M146T68	Spermidine	146.165	68	145.158	0.00423974	C7H19N3	[M+H]+	Organonitrogen compounds	Amines	C00315	Membrane transport; Metabolism of other amino acids; Digestive system; Biosynthesis of other secondary metabolites; Metabolism of terpenoids and polyketides; Amino acid metabolism; Global and overview maps	124-20-9	HMDB0001257	BioDeepDB	2	pos	1.96057e+06	9.42865e+06	2.42075e+06	2.35625e+06	2.48228e+06	4.91106e+06	6.85177e+06	6.76463e+06	4.98333e+06	2.77898e+06	7.95888e+06	2.39237e+06	1.57347e+06	5.81917e+06	5.06568e+06	4.65536e+06	1.997e+06	3.32931e+06	4.17211e+06	8.08632e+06	2.71212e+06	2.16542e+06	2.66516e+06	2.5072e+06
M187T62	Undecanoic acid	186.955	62.3	186.162	7.58083	C11H22O2	[M+H]+	Fatty Acyls	Fatty acids and conjugates	C17715		112-37-8	HMDB0000947	BioDeepDB	2	pos	2.94537e+07	8.0075e+06	2.61232e+07	3.08722e+07	3.0812e+07	2.57602e+07	2.95763e+07	3.62832e+07	1.81138e+07	2.02055e+07	2.99418e+07	4.13799e+07	3.11336e+07	1.92292e+07	2.70328e+07	2.76798e+07	2.42274e+07	4.90393e+07	1.22284e+08	5.137e+07	3.65166e+07	2.79532e+07	2.82656e+07	3.01309e+07
M131T474	Ketoleucine	131.081	473.9	130.063	2.89499	C6H10O3	[M+H]+	Keto acids and derivatives	Short-chain keto acids and derivatives	C00233	Amino acid metabolism; Biosynthesis of other secondary metabolites; Global and overview maps	816-66-0	HMDB0000695	BioDeepDB	2	pos	8.77641e+06	1.40801e+07	7.56053e+06	8.28321e+06	8.50432e+06	6.21777e+06	1.14254e+07	7.22604e+06	9.82113e+06	1.24399e+07	1.9879e+07	9.80177e+06	6.58332e+06	6.70715e+06	9.63972e+06	1.13672e+07	9.30888e+06	9.96342e+06	1.17527e+07	5.44339e+06	1.03263e+07	9.37917e+06	7.37508e+06	1.06166e+07
M159T36	Allantoin	158.96	35.7	158.044	21.342	C4H6N4O3	[M+H]+	Azoles	Imidazoles	C01551		97-59-6	HMDB0000462	BioDeepDB	2	pos	6.18442e+07	9.47714e+07	8.66083e+07	1.01338e+08	2.30889e+07	8.38758e+07	2.05064e+07	1.08423e+08	1.79225e+07	1.74271e+07	2.14496e+07	4.74402e+07	1.13227e+08	2.10489e+07	7.51631e+07	9.56353e+07	1.48409e+07	1.23569e+08	5.09164e+07	9.57649e+07	1.60731e+07	7.44128e+06	6.1783e+07	9.1516e+07
M183T69	Sorbitol	182.987	68.7	182.079	0.609327	C6H14O6	[M+H]+	Organooxygen compounds	Carbohydrates and carbohydrate conjugates	C00794	Carbohydrate metabolism; Membrane transport; Global and overview maps	50-70-4	HMDB0000247	BioDeepDB	2	pos	5.72407e+07	1.89618e+07	9.26882e+07	2.52678e+07	8.43862e+07	7.45919e+07	2.47345e+07	1.14216e+08	7.35222e+07	5.1453e+07	5.87273e+07	8.52888e+07	1.08478e+08	1.55331e+07	8.61226e+07	2.84415e+07	2.09767e+07	8.70419e+07	7.25949e+07	2.43675e+07	1.25749e+08	5.60315e+07	1.40354e+08	1.20916e+08
M282T122	1-Methyladenosine	282.118	121.5	281.112	5.05399	C11H15N5O4	[M+H]+	Purine nucleosides		C02494		15763-06-1	HMDB0003331	BioDeepDB	2	pos	1.44838e+06	4.1143e+07	3.60572e+07	1.41157e+06	1.43975e+06	1.79709e+06	4.154e+07	3.34726e+07	3.10986e+07	992582	4.57638e+07	2.50765e+07	1.66576e+06	3.57007e+07	3.12434e+07	1.36269e+06	1.70182e+06	3.7971e+07	4.0684e+07	6.34561e+07	6.29035e+07	5.53718e+07	4.10771e+07	2.87504e+07
M200T648	Dodecanoic acid	200.165	647.7	200.178	2.49063	C12H24O2	[M]+	Fatty Acyls	Fatty acids and conjugates	C02679	Lipid metabolism; Biosynthesis of other secondary metabolites; Global and overview maps	143-07-7	HMDB0000638	BioDeepDB	2	pos	1.52248e+07	4.7433e+06	1.26048e+07	1.81833e+07	1.97208e+07	4.51967e+07	1.03406e+07	1.66465e+07	1.53878e+07	6.15269e+06	1.30513e+07	7.2388e+06	7.0284e+06	6.48111e+06	1.26726e+07	2.83829e+07	2.17077e+07	2.19383e+07	1.94247e+07	2.0073e+07	1.6706e+07	6.78378e+06	8.54171e+06	1.1214e+07
M158T59	4,5-Dihydroorotic acid	158.002	58.9	158.033	5.19765	C5H6N2O4	[M]+	Carboxylic acids and derivatives	Amino acids, peptides, and analogues	C00337	Global and overview maps; Nucleotide metabolism	155-54-4 / 5988-19-2	HMDB0000528	BioDeepDB	2	pos	1.67825e+07	1.40182e+07	1.35029e+07	2.12067e+07	1.30083e+07	1.80116e+07	1.36225e+07	1.23408e+07	1.51321e+07	1.28238e+07	2.02556e+07	1.56147e+07	2.09722e+07	2.02819e+07	2.42769e+07	1.4561e+07	2.03729e+07	2.23434e+07	1.72791e+07	1.39231e+07	1.67796e+07	1.55468e+07	1.5419e+07	1.1621e+07
M324T111_1	CMP	324.058	111.3	323.052	2.56772	C9H14N3O8P	[M+H]+	Pyrimidine nucleotides	Pyrimidine ribonucleotides	C00055	Global and overview maps; Nucleotide metabolism	63-37-6	HMDB0000095	BioDeepDB	2	pos	3.50738e+06	1.91013e+07	1.49145e+07	2.13974e+06	1.64504e+06	3.22e+06	8.84633e+06	3.32512e+07	1.29093e+07	2.32059e+06	2.14951e+07	3.37482e+06	2.00989e+06	9.75575e+06	3.80017e+06	3.41819e+06	3.43477e+06	4.05269e+07	1.73181e+07	2.28129e+07	9.63155e+06	3.43552e+07	4.26934e+07	2.67255e+06
M283T408	Oleic acid	283.175	407.8	282.256	1.52205	C18H34O2	[M+H]+	Fatty Acyls	Fatty acids and conjugates	C00712	Lipid metabolism; Chemical structure transformation maps; Aging	112-80-1	HMDB0000207	BioDeepDB	2	pos	2.77824e+07	3.5846e+07	2.65385e+07	7.55966e+07	4.77106e+07	4.06667e+07	5.23813e+07	4.88903e+07	6.71625e+07	2.70576e+07	3.03786e+07	4.89987e+07	3.19596e+07	3.52055e+07	2.38482e+07	2.41893e+07	6.26196e+07	3.71073e+07	6.21922e+06	4.23568e+07	2.66407e+07	4.44854e+07	1.79347e+07	3.1637e+07
M281T773	Linoleic acid	281.247	773.4	280.24	1.69246	C18H32O2	[M+H]+	Fatty Acyls	Lineolic acids and derivatives	C01595	Lipid metabolism; Chemical structure transformation maps; Global and overview maps	60-33-3	HMDB0000673	BioDeepDB	2	pos	9.12695e+06	5.09438e+07	2.77655e+07	1.66763e+07	3.64591e+07	2.24077e+07	5.05831e+07	1.53075e+07	2.93844e+07	2.21631e+07	2.57778e+07	3.81642e+07	2.34741e+07	1.08731e+07	2.82278e+07	2.4974e+07	1.26419e+07	2.15363e+07	3.55141e+07	6.43683e+07	3.94935e+07	4.33383e+07	3.02217e+07	8.27021e+06
M101T119	Triethylamine	101.06	118.6	101.12	2.18944	C6H15N	[M]+	Amines	Tertiary amines	C14691		121-44-8	HMDB0032539	BioDeepDB	2	pos	7.63987e+06	7.06789e+06	7.90745e+06	7.89086e+06	9.09562e+06	9.35554e+06	8.55152e+06	7.9619e+06	8.69293e+06	7.96347e+06	7.02935e+06	7.52658e+06	8.0358e+06	6.94175e+06	1.00949e+07	9.06184e+06	8.21064e+06	9.35127e+06	7.94577e+06	7.65529e+06	8.67791e+06	7.65798e+06	8.00223e+06	8.03763e+06
M102T65	Isovaleric acid	102.127	64.6	102.068	6.99641	C5H10O2	[M]+	Fatty Acyls	Fatty acids and conjugates	C08262	Chemical structure transformation maps; Global and overview maps; Digestive system	503-74-2	HMDB0000718	BioDeepDB	2	pos	5.83772e+07	3.84527e+07	1.08021e+08	2.25118e+08	2.74784e+07	3.90747e+07	3.31456e+07	1.23766e+08	1.4144e+08	6.55741e+07	3.15774e+07	1.44994e+08	9.33752e+07	1.32496e+08	3.165e+07	2.72835e+07	1.05532e+08	3.2067e+07	1.25726e+08	1.35038e+08	1.26848e+08	1.29016e+08	8.66013e+07	1.23558e+08
M278T457	Gamma-Linolenic acid	278.185	456.6	278.225	0.916737	C18H30O2	[M]+	Fatty Acyls	Lineolic acids and derivatives	C06426	Lipid metabolism; Global and overview maps	506-26-3	HMDB0003073	BioDeepDB	2	pos	1.15405e+07	8.50267e+06	7.52333e+06	7.77653e+06	5.74674e+06	7.69663e+06	7.08293e+06	8.78784e+06	9.45114e+06	4.21747e+06	6.29797e+06	8.40135e+06	1.08437e+07	5.21735e+06	1.39369e+07	8.55909e+06	5.20329e+06	4.00119e+06	4.30974e+06	3.78773e+06	6.37102e+06	4.53151e+06	4.48062e+06	1.3588e+07
M110T67	Catechol	110.021	66.9	110.037	1.89253	C6H6O2	[M]+			C00090	Xenobiotics biodegradation and metabolism; Global and overview maps	120-80-9 / 12385-08-9		BioDeepDB	2	pos	1.32269e+07	1.34207e+07	1.23731e+07	1.34599e+07	1.28231e+07	1.40832e+07	1.38365e+07	1.35121e+07	1.34766e+07	1.38104e+07	1.3202e+07	1.40209e+07	1.33737e+07	1.31878e+07	1.32285e+07	1.40534e+07	1.38626e+07	1.2664e+07	1.31305e+07	1.34477e+07	1.38495e+07	1.30844e+07	1.38612e+07	1.34792e+07
M130T155	Pipecolic acid	130.05	155.2	129.079	20.2747	C6H11NO2	[M+H]+	Carboxylic acids and derivatives	Amino acids, peptides, and analogues	C00408	Chemical structure transformation maps; Amino acid metabolism; Biosynthesis of other secondary metabolites; Global and overview maps	535-75-1 / 3105-95-1	HMDB0000070	BioDeepDB	2	pos	1.13985e+07	1.68719e+08	1.79749e+08	7.51078e+06	1.18576e+07	3.50938e+07	3.07662e+07	1.71178e+08	7.34343e+07	7.06389e+06	1.33831e+08	3.68878e+07	2.26741e+07	6.32946e+07	1.46736e+08	2.95308e+07	1.37889e+07	8.12731e+07	1.31417e+08	6.61962e+07	1.39663e+08	1.37525e+08	2.40828e+08	7.02099e+07
M169T137_2	Uric acid	169.036	136.9	168.028	0.733573	C5H4N4O3	[M+H]+	Imidazopyrimidines	Purines and purine derivatives	C00366	Global and overview maps; Nucleotide metabolism; Digestive system	69-93-2	HMDB0000289	BioDeepDB	2	pos	1.94574e+06	1.02959e+07	9.12161e+06	5.56187e+06	1.45266e+07	1.82707e+06	2.96318e+06	7.88464e+06	9.99905e+06	9.82634e+06	1.1759e+07	8.0795e+06	1.77113e+06	7.53317e+06	6.57177e+06	6.445e+06	1.62877e+06	1.95831e+06	1.63436e+06	3.62837e+06	5.39559e+06	4.6571e+06	4.56109e+06	7.70301e+06
M242T356	Equol	242.1	356.4	242.094	22.23	C15H14O3	[M]+	Isoflavonoids	Isoflavans	C14131		531-95-3	HMDB0002209	BioDeepDB	2	pos	4.12418e+07	2.54517e+07	9.0661e+06	6.15651e+07	1.61141e+07	2.76609e+07	6.42578e+07	2.19372e+07	2.09014e+07	3.47639e+07	2.88313e+07	1.56782e+07	1.49415e+07	2.4785e+07	2.72217e+07	2.49521e+07	1.19678e+07	2.71019e+07	1.80333e+07	2.94509e+06	8.33211e+06	6.32259e+06	1.88004e+07	1.38021e+07
M148T100	L-Glutamic acid	148.06	99.7	147.053	0.0378681	C5H9NO4	[M+H]+	Carboxylic acids and derivatives	Amino acids, peptides, and analogues	C00025	Neurodegenerative disease; Biosynthesis of other secondary metabolites; Substance dependence; Cellular community - eukaryotes; Energy metabolism; Metabolism of other amino acids; Excretory system; Carbohydrate metabolism; Cancer: overview; Membrane transport; Cell growth and death; Signal transduction; Nervous system; Digestive system; Environmental adaptation; Amino acid metabolism; Chemical str…	56-86-0	HMDB0000148	BioDeepDB	2	pos	2.70121e+07	1.57755e+07	3.60014e+07	4.27515e+07	3.83656e+07	2.78415e+07	4.05166e+07	2.14577e+07	1.73728e+07	5.24144e+07	2.62431e+07	3.8086e+07	3.78625e+07	3.67348e+07	4.45496e+07	2.05141e+07	4.11536e+07	4.20076e+07	3.01605e+07	5.02206e+07	3.98328e+07	4.35597e+07	4.17203e+07	4.50414e+07
M339T114_1	AICAR	339.069	113.8	338.063	2.87847	C9H15N4O8P	[M+H]+	Imidazole ribonucleosides and ribonucleotides	1-ribosyl-imidazolecarboxamides	C04677	Signal transduction; Nucleotide metabolism; Amino acid metabolism; Chemical structure transformation maps; Global and overview maps	3031-94-5	HMDB0001517	BioDeepDB	2	pos	2.35138e+07	2.17326e+07	2.80425e+07	9.72904e+06	1.49787e+07	1.16692e+07	4.7983e+07	2.33281e+07	1.41813e+07	1.35191e+07	1.60597e+07	9.98002e+06	1.49142e+07	2.53899e+07	1.08043e+07	1.29447e+07	1.84077e+07	2.42233e+07	2.71381e+07	1.73069e+07	2.07209e+07	1.1733e+07	1.56568e+07	9.03536e+06
M167T72	L-4-Hydroxyphenylglycine	167.013	72.1	167.058	1.0646	C8H9NO3	[M]+			C12323	Biosynthesis of other secondary metabolites; Global and overview maps; Metabolism of terpenoids and polyketides	32462-30-9		BioDeepDB	2	pos	3.94775e+07	5.87845e+07	6.86438e+07	3.57902e+07	4.15721e+07	3.54809e+07	5.08953e+07	4.67724e+07	3.96787e+07	5.41063e+07	4.68637e+07	4.12281e+07	3.7957e+07	3.04845e+07	3.55403e+07	3.72845e+07	4.26102e+07	4.23301e+07	4.14349e+07	3.72039e+07	4.28286e+07	3.77224e+07	3.09978e+07	3.32003e+07
M126T72	Ciliatine	125.986	72.2	125.024	4.17895	C2H8NO3P	[M+H]+	Organic phosphonic acids and derivatives	Organic phosphonic acids	C03557	Membrane transport; Metabolism of other amino acids; Global and overview maps	2041-14-7	HMDB0011747	BioDeepDB	2	pos	1.44915e+08	1.45846e+08	1.50756e+08	1.37332e+08	1.35354e+08	1.52768e+08	1.68276e+08	8.8698e+07	1.46614e+08	1.4922e+08	1.48366e+08	1.31982e+08	1.58881e+08	1.2029e+08	1.52591e+08	1.47687e+08	1.39961e+08	1.41822e+08	1.57327e+08	1.56914e+08	1.56476e+08	1.34927e+08	1.4307e+08	1.37896e+08
M147T113	L-Lysine	147.077	113.2	146.106	6.11511	C6H14N2O2	[M+H]+	Carboxylic acids and derivatives	Amino acids, peptides, and analogues	C00047	Metabolism of cofactors and vitamins; Digestive system; Biosynthesis of other secondary metabolites; Translation; Amino acid metabolism; Chemical structure transformation maps; Global and overview maps	56-87-1	HMDB0000182	BioDeepDB	2	pos	1.23849e+07	1.21762e+07	1.90246e+07	5.9132e+06	4.01072e+07	1.9389e+07	4.75434e+07	3.56778e+07	5.67906e+07	6.81572e+07	5.81004e+07	5.07514e+07	4.48068e+07	4.46086e+07	5.39801e+07	4.82073e+07	5.07752e+07	4.93926e+07	4.94785e+07	4.50321e+07	4.73555e+07	4.80851e+07	4.35522e+07	5.24027e+07
M302T782	Sphinganine	302.305	781.6	301.298	0.0762332	C18H39NO2	[M+H]+	Organonitrogen compounds	Amines	C00836	Lipid metabolism; Signal transduction; Global and overview maps	764-22-7	HMDB0000269	BioDeepDB	2	pos	6.70769e+07	5.28044e+07	1.48523e+08	6.00004e+07	9.232e+07	1.07728e+08	4.58428e+07	5.10341e+07	3.36279e+07	4.59739e+07	6.26218e+07	4.25029e+07	1.04792e+08	7.94167e+07	5.49735e+06	1.07618e+08	7.65202e+07	9.11874e+07	1.70493e+08	5.33856e+07	7.95896e+07	3.61219e+07	1.17962e+08	9.80612e+06
M175T83_1	L-Arginine	175.119	83.2	174.112	0.29165	C6H14N4O2	[M+H]+	Carboxylic acids and derivatives	Amino acids, peptides, and analogues	C00062	Cancer: overview; Membrane transport; Neurodegenerative disease; Biosynthesis of other secondary metabolites; Translation; Amino acid metabolism; Chemical structure transformation maps; Infectious disease: parasitic; Global and overview maps	74-79-3	HMDB0000517	BioDeepDB	2	pos	3.81804e+08	3.65965e+08	4.33042e+08	9.91884e+07	1.00833e+08	3.69375e+08	6.1522e+08	3.95264e+08	5.72471e+08	2.97905e+08	3.44289e+08	3.26684e+08	4.81174e+08	3.62509e+08	2.79838e+08	3.64685e+08	7.62822e+08	4.31566e+08	4.3481e+08	2.87699e+08	3.73692e+08	3.31782e+08	3.56093e+08	4.3221e+08
M613T168_2	Oxidized glutathione	613.162	168.3	612.152	3.79204	C20H32N6O12S2	[M+H]+	Carboxylic acids and derivatives	Amino acids, peptides, and analogues	C00127	Cell growth and death; Metabolism of other amino acids; Global and overview maps; Endocrine system	27025-41-8	HMDB0003337	BioDeepDB	2	pos	1.25232e+08	1.34707e+08	1.13003e+08	1.4094e+08	7.66685e+07	1.65489e+08	1.12306e+08	4.74455e+07	1.59353e+08	2.17018e+08	1.61528e+08	4.60714e+07	9.81464e+07	9.24487e+07	1.0348e+08	4.87756e+07	1.0834e+08	1.17978e+08	1.04423e+08	5.19598e+07	1.46961e+08	6.1203e+07	9.9337e+07	3.90459e+07
M106T84	L-Serine	106.05	84.5	105.043	0.226309	C3H7NO3	[M+H]+	Carboxylic acids and derivatives	Amino acids, peptides, and analogues	C00065	Cancer: overview; Membrane transport; Metabolism of other amino acids; Chemical structure transformation maps; Drug resistance: antimicrobial; Signal transduction; Digestive system; Lipid metabolism; Carbohydrate metabolism; Biosynthesis of other secondary metabolites; Translation; Amino acid metabolism; Energy metabolism; Global and overview maps	56-45-1	HMDB0000187	BioDeepDB	2	pos	6.46533e+07	7.08871e+07	6.50111e+07	8.01438e+07	6.77565e+07	5.74118e+07	7.82454e+07	7.35343e+07	6.73003e+07	9.92476e+07	7.67242e+07	7.21808e+07	7.06107e+07	1.01905e+08	1.00992e+08	1.2094e+08	1.09044e+08	1.26549e+08	1.55734e+08	7.8728e+07	1.29168e+08	1.54287e+08	1.53242e+08	1.39813e+08
M133T85	L-Asparagine	133.061	84.6	132.054	0.931904	C4H8N2O3	[M+H]+	Carboxylic acids and derivatives	Amino acids, peptides, and analogues	C00152	Cancer: overview; Metabolism of other amino acids; Digestive system; Translation; Amino acid metabolism; Chemical structure transformation maps; Global and overview maps	2058-58-4	HMDB0033780	BioDeepDB	2	pos	5.0344e+07	4.41245e+07	3.86334e+07	4.49377e+07	5.01013e+07	4.04862e+07	4.56636e+07	4.16315e+07	5.15204e+07	6.73671e+07	4.66385e+07	3.09557e+07	5.48844e+07	1.58323e+07	5.76995e+07	1.9941e+07	4.61691e+07	5.44162e+07	6.35307e+07	1.49411e+07	6.2587e+07	6.04808e+07	4.87445e+07	5.6205e+07
M188T312	Homo-L-arginine	188.128	312.4	188.127	3.72087	C7H16N4O2	[M]+	Carboxylic acids and derivatives	Amino acids, peptides, and analogues	C01924		156-86-5	HMDB0000670	MoNA	2	pos	6.95299e+06	6.57261e+06	6.39132e+06	5.53017e+06	5.27935e+06	5.26436e+06	6.7164e+06	7.07425e+06	6.16085e+06	8.68717e+06	8.60343e+06	7.93738e+06	5.16304e+06	7.34903e+06	6.94681e+06	5.41604e+06	6.01595e+06	6.24615e+06	6.37529e+06	4.06264e+06	6.73104e+06	7.07145e+06	8.34817e+06	1.07423e+07
M104T86	gamma-Aminobutyric acid	104.107	85.6	103.063	2.72535	C4H9NO2	[M+H]+	Carboxylic acids and derivatives	Amino acids, peptides, and analogues	C00334	Metabolism of cofactors and vitamins; Metabolism of other amino acids; Signal transduction; Nervous system; Sensory system; Endocrine system; Carbohydrate metabolism; Signaling molecules and interaction; Amino acid metabolism; Cellular community - prokaryotes; Global and overview maps	56-12-2	HMDB0000112	BioDeepDB	2	pos	3.9607e+08	1.14059e+09	1.21045e+09	3.56659e+08	1.20832e+09	1.02186e+09	1.22955e+09	1.20357e+09	1.34219e+09	1.50368e+09	1.59087e+09	1.3649e+09	1.22964e+09	1.30358e+09	1.49168e+09	1.37122e+09	1.5142e+09	1.6595e+09	1.45917e+09	2.08916e+09	1.34183e+09	1.27466e+09	8.82461e+08	1.30468e+09
M209T334	L-Kynurenine	209.092	333.6	208.085	0.114782	C10H12N2O3	[M+H]+	Organooxygen compounds	Carbonyl compounds	C00328	Amino acid metabolism; Infectious disease: parasitic; Global and overview maps	2922-83-0 / 343-65-7	HMDB0000684	BioDeepDB	2	pos	5.46583e+06	5.69825e+06	6.19018e+06	2.31342e+06	4.3994e+06	4.98762e+06	2.42735e+07	6.13525e+06	2.53642e+06	1.12343e+07	4.15474e+06	2.91012e+06	961158	1.58027e+06	3.16736e+06	8.37737e+06	2.9213e+06	1.87565e+06	6.09269e+06	6.61298e+06	1.1279e+06	5.49678e+06	1.57289e+07	4.95759e+06
M228T768	Deoxyuridine	228.195	767.7	228.075	3.08652	C9H12N2O5	[M]+	Pyrimidine nucleosides	Pyrimidine 2'-deoxyribonucleosides	C00526	Membrane transport; Global and overview maps; Nucleotide metabolism	951-78-0	HMDB0000012	BioDeepDB	2	pos	2.06373e+07	7.89403e+06	3.0836e+07	2.13383e+07	1.19889e+07	2.05218e+07	1.63214e+07	3.97982e+07	3.46873e+07	4.55486e+07	5.83738e+07	3.85454e+07	5.35388e+07	3.17239e+07	2.53069e+07	2.59992e+07	3.12322e+07	1.49575e+07	1.60087e+07	3.37884e+07	5.52048e+07	3.8624e+07	1.74785e+07	5.5074e+07
M113T174	Uracil	113.035	173.9	112.027	0.98004	C4H4N2O2	[M+H]+	Diazines	Pyrimidines and pyrimidine derivatives	C00106	Metabolism of cofactors and vitamins; Metabolism of other amino acids; Global and overview maps; Nucleotide metabolism	66-22-8	HMDB0000300	BioDeepDB	2	pos	1.65429e+07	2.8859e+07	3.30206e+07	1.60362e+07	2.82037e+07	2.79468e+07	3.28585e+07	3.04006e+07	3.14442e+07	3.76822e+07	3.90803e+07	3.6989e+07	2.6839e+07	3.03109e+07	2.79136e+07	2.84316e+07	3.60716e+07	2.07951e+07	3.57391e+07	3.86659e+07	3.03114e+07	1.67621e+07	2.97679e+07	4.17407e+07
M163T707	Anabasine	163.039	706.7	162.116	0.570523	C10H14N2	[M+H]+			C06180	Chemical structure transformation maps; Biosynthesis of other secondary metabolites; Global and overview maps	13078-04-1 / 494-52-0	HMDB0004350	BioDeepDB	2	pos	9.22927e+06	4.39127e+07	4.14131e+07	2.5169e+07	4.40944e+07	3.5759e+07	3.65085e+07	3.4795e+07	3.4387e+07	3.41804e+07	3.27968e+07	1.12913e+07	2.26165e+07	2.24969e+07	4.3941e+07	4.03889e+07	4.28043e+07	3.63116e+07	3.83599e+07	3.92256e+07	3.33832e+07	5.0744e+07	2.50988e+07	6.38609e+07
M188T397	N-Alpha-acetyllysine	188.071	397.2	188.116	0.178896	C8H16N2O3	[M]+	Carboxylic acids and derivatives	Amino acids, peptides, and analogues	C12989		1946-82-3	HMDB0000446	BioDeepDB	2	pos	1.09393e+09	6.65866e+08	1.14269e+09	7.89065e+08	9.63652e+08	9.43273e+08	3.97639e+08	7.22282e+08	4.60111e+08	8.72965e+08	8.83678e+08	5.83611e+08	4.64331e+08	3.34247e+08	7.18827e+08	8.31947e+08	8.79384e+08	5.84379e+08	7.16763e+08	4.55763e+08	9.67645e+08	8.05357e+08	1.93405e+08	2.96726e+08
M170T94	Pyridoxine	170.032	94.4	169.074	10.5068	C8H11NO3	[M+H]+	Pyridines and derivatives	Pyridoxines	C00314	Metabolism of cofactors and vitamins; Global and overview maps	65-23-6	HMDB0000239	BioDeepDB	2	pos	1.6211e+07	4.08231e+07	1.09128e+07	4.3833e+07	1.35639e+07	2.60795e+07	1.46377e+07	1.06615e+07	1.20261e+07	1.76081e+07	1.04697e+07	1.11497e+07	2.12894e+07	4.54603e+07	3.20924e+07	3.22523e+07	1.90422e+07	2.78313e+07	1.70286e+07	1.26744e+07	1.73449e+07	1.79402e+07	3.27883e+07	4.38361e+07
M155T517	2,3-Butanediol	155.107	516.5	154.012	0.0303785	C4H10O2S2	[M+H]+	Organooxygen compounds	Alcohols and polyols	C00265		513-85-9 / 3483-12-3	HMDB0003156	BioDeepDB	2	pos	2.6258e+06	1.14705e+07	1.95287e+06	4.57437e+06	2.13924e+06	5.54803e+06	7.94161e+06	2.14046e+06	4.60375e+06	3.19512e+06	4.50414e+06	9.80706e+06	5.98284e+06	6.06807e+06	4.01662e+06	1.24391e+07	3.48418e+06	6.14495e+06	1.19109e+07	7.41199e+06	8.0383e+06	9.48614e+06	3.31961e+06	2.03374e+06
M132T189_1	L-Leucine	132.102	188.6	131.095	0.756991	C6H13NO2	[M+H]+	Carboxylic acids and derivatives	Amino acids, peptides, and analogues	C00123	Membrane transport; Signal transduction; Digestive system; Biosynthesis of other secondary metabolites; Translation; Amino acid metabolism; Chemical structure transformation maps; Global and overview maps	61-90-5	HMDB0000687	BioDeepDB	2	pos	6.41705e+10	4.61153e+09	3.5203e+10	4.52248e+09	7.19027e+09	3.94013e+09	1.71128e+10	7.90409e+10	1.01266e+10	1.86552e+10	2.32523e+10	1.06259e+09	4.04652e+10	9.65001e+09	1.62709e+10	2.11501e+10	2.44952e+10	7.64173e+09	7.09268e+09	5.21939e+09	3.25461e+09	2.89169e+09	3.15626e+09	1.8984e+09
M343T741_2	Sucrose	343.295	740.6	342.116	0.18093	C12H22O11	[M+H]+	Organooxygen compounds	Carbohydrates and carbohydrate conjugates	C00089	Membrane transport; Sensory system; Digestive system; Carbohydrate metabolism; Global and overview maps	57-50-1	HMDB0000258	BioDeepDB	2	pos	3.99252e+07	2.79484e+07	4.58618e+07	4.15107e+07	3.53142e+07	7.26775e+07	4.81746e+07	1.37617e+07	4.21771e+07	3.97894e+07	5.69546e+07	6.06816e+07	3.16697e+07	4.13947e+07	2.71684e+07	2.41916e+07	4.07985e+07	4.77213e+07	9.35034e+07	3.29606e+07	4.41086e+07	4.77441e+07	3.01517e+07	2.83245e+07
M428T99_2	ADP	428.032	99.2	427.029	10.9244	C10H15N5O10P2	[M+H]+	Purine nucleotides	Purine ribonucleotides	C00008	Transport and catabolism; Signal transduction; Sensory system; Endocrine system; Environmental adaptation; Neurodegenerative disease; Signaling molecules and interaction; Metabolism of terpenoids and polyketides; Nucleotide metabolism; Energy metabolism; Immune system; Global and overview maps	58-64-0 / 20398-34-9	HMDB0001341	BioDeepDB	2	pos	3.47381e+08	3.46182e+08	4.37384e+08	3.75234e+08	3.67555e+08	5.61352e+08	1.13579e+08	6.47017e+08	3.58711e+08	3.00766e+08	3.83908e+08	2.28352e+08	2.26511e+08	3.30488e+08	2.12543e+08	2.43746e+08	1.83955e+08	2.76009e+08	1.17808e+08	2.42594e+08	1.74058e+08	1.5492e+08	2.43e+08	2.55566e+08
M286T771	Fisetin	286.274	770.9	286.048	3.58987	C15H10O6	[M]+			C10041		345909-34-4		BioDeepDB	2	pos	1.18873e+08	2.15051e+08	1.48499e+08	1.69466e+08	3.2131e+07	1.39646e+08	1.60297e+08	4.76984e+07	4.97535e+07	3.95676e+07	1.7277e+08	2.12622e+08	3.82234e+07	1.60546e+08	2.10802e+08	1.65977e+08	2.55518e+08	7.18186e+07	8.03172e+07	7.79928e+07	1.63185e+08	2.31988e+08	1.61561e+08	6.97881e+07
M341T99	Fructose 1,6-bisphosphate	341.002	99.4	339.996	3.44866	C6H14O12P2	[M+H]+	Organooxygen compounds	Carbohydrates and carbohydrate conjugates	C00354	Cancer: overview; Signal transduction; Endocrine system; Amino acid metabolism; Energy metabolism; Global and overview maps	488-69-7	HMDB0001058	BioDeepDB	2	pos	3.19455e+07	3.20857e+07	7.6426e+07	5.068e+06	7.87207e+07	4.8243e+07	8.62012e+07	5.53916e+07	2.31652e+07	1.6915e+06	2.34524e+07	1.97176e+07	1.17221e+07	2.44383e+06	2.04657e+07	8.63181e+07	2.15644e+06	7.38836e+07	1.097e+07	1.54257e+07	3.59595e+06	1.91774e+07	5.57328e+06	6.50713e+06
M334T743	Nicotinamide ribotide	334.295	743.5	334.057	1.17233	C11H15N2O8P	[M]+	Pyridine nucleotides	Nicotinamide nucleotides	C00455	Metabolism of cofactors and vitamins; Global and overview maps	1094-61-7	HMDB0000229	BioDeepDB	2	pos	2.51725e+06	1.95317e+06	2.29541e+06	1.65585e+06	701069	819758	1.82742e+06	1.34583e+06	2.0423e+06	2.17311e+06	2.6407e+06	3.21325e+06	2.08714e+06	2.45856e+06	2.72377e+06	3.02952e+06	1.89504e+06	2.29519e+06	3.18169e+06	2.10515e+06	2.30951e+06	2.06314e+06	3.86544e+06	3.59568e+06
M138T100	4-Hydroxybenzoic acid	138.055	100.1	138.032	0.951111	C7H6O3	[M]+	Benzene and substituted derivatives	Benzoic acids and derivatives	C00156	Metabolism of cofactors and vitamins; Skeleton-based classification; Xenobiotics biodegradation and metabolism; Chemical structure transformation maps; Global and overview maps	99-96-7 / 456-23-5	HMDB0000500	BioDeepDB	2	pos	1.0369e+07	1.10764e+07	9.65047e+06	1.1916e+07	7.78926e+06	6.55972e+06	9.24113e+06	9.65588e+06	9.9526e+06	1.39844e+07	8.30622e+06	7.97209e+06	1.12232e+07	8.76007e+06	1.00839e+07	7.46637e+06	6.91279e+06	8.11091e+06	8.16339e+06	7.68887e+06	8.67742e+06	8.4199e+06	9.67811e+06	9.97834e+06
M162T114	L-Carnitine	162.113	114.3	161.105	0.7649	C7H15NO3	[M+H]+	Organonitrogen compounds	Quaternary ammonium salts	C00318	Environmental adaptation; Digestive system	541-15-1	HMDB0000062	BioDeepDB	2	pos	6.09511e+07	3.8375e+07	4.87943e+07	5.62946e+07	3.34925e+07	1.8003e+07	5.82525e+07	4.23536e+07	7.32729e+07	6.6079e+07	7.07869e+07	6.234e+07	5.61244e+07	3.94975e+07	9.94354e+07	5.48898e+07	6.20476e+07	5.46153e+07	4.47594e+07	5.55267e+07	5.83269e+07	5.6796e+07	4.64073e+07	8.45286e+07
M110T811	Hydroquinone	110.02	811.1	110.037	2.29819	C6H6O2	[M]+	Phenols	Benzenediols	C00530	Amino acid metabolism; Xenobiotics biodegradation and metabolism; Global and overview maps	123-31-9	HMDB0002434	BioDeepDB	2	pos	1.12771e+08	1.43936e+08	1.39991e+08	1.05188e+08	2.8884e+08	4.60889e+08	1.16552e+08	5.66407e+07	3.21771e+07	6.61953e+07	6.76041e+07	4.1019e+07	1.13333e+08	1.32666e+08	1.44024e+07	1.37873e+08	7.89371e+07	8.05272e+07	2.30927e+08	7.07407e+07	8.85744e+07	1.08835e+08	1.40677e+08	2.42955e+07
M369T839_2	Cholesterol	369.349	838.5	386.355	3.07027	C27H46O	[M+H-H2O]+	Steroids and steroid derivatives	Cholestane steroids	C00187	Endocrine and metabolic disease; Digestive system; Endocrine system; Lipid metabolism; Xenobiotics biodegradation and metabolism; Metabolism of terpenoids and polyketides; Cancer: specific types; Chemical structure transformation maps; Global and overview maps	57-88-5	HMDB0000067	BioDeepDB	2	pos	1.71079e+07	8.05914e+06	1.93239e+07	1.8813e+07	1.84707e+07	1.8112e+07	9.56824e+06	9.53611e+06	1.54055e+07	8.07705e+06	7.75478e+06	1.6119e+07	1.51676e+07	9.86561e+06	1.15153e+07	1.8467e+07	2.245e+07	9.49903e+06	1.16514e+07	9.38644e+06	1.69323e+07	1.5197e+07	8.28444e+06	9.87594e+06
M112T118	Cytosine	112.05	118.1	111.043	6.03303	C4H5N3O	[M+H]+	Diazines	Pyrimidines and pyrimidine derivatives	C00380	Global and overview maps; Nucleotide metabolism	71-30-7	HMDB0000630	BioDeepDB	2	pos	6.63559e+08	1.02934e+08	3.92143e+08	4.44759e+08	9.50595e+08	3.24892e+08	3.27082e+08	6.73111e+08	7.32035e+08	3.47573e+08	1.39225e+08	9.47532e+08	5.76437e+08	1.93782e+08	4.95539e+08	3.57349e+08	4.63842e+08	2.18423e+08	4.25667e+08	3.45922e+08	3.58028e+08	4.29379e+08	1.37802e+08	1.46847e+08
M349T121	IMP	349.055	121.1	348.047	0.0230539	C10H13N4O8P	[M+H]+	Purine nucleotides	Purine ribonucleotides	C00130	Drug resistance: antineoplastic; Sensory system; Nucleotide metabolism; Chemical structure transformation maps; Global and overview maps	131-99-7	HMDB0000175	BioDeepDB	2	pos	4.56586e+08	4.82573e+08	3.96972e+08	4.69945e+08	4.90338e+08	4.47419e+08	6.3652e+08	4.31642e+08	4.38322e+08	6.62965e+08	6.11055e+08	5.13954e+08	4.50843e+08	4.17077e+08	8.46698e+08	4.02489e+08	3.98443e+08	3.68242e+08	5.6023e+08	3.80686e+08	3.25106e+08	8.22731e+08	4.25176e+08	4.42022e+08
M307T122	Glutathione	307.083	122.1	307.084	0.138105	C10H17N3O6S	[M]+			C00051	Membrane transport; Cell growth and death; Metabolism of other amino acids; Digestive system; Endocrine system; Amino acid metabolism; Global and overview maps	70-18-8		BioDeepDB	2	pos	3.33878e+08	4.04746e+08	3.14466e+08	2.61178e+08	3.35187e+08	9.68794e+07	4.49054e+08	9.50416e+08	4.78356e+08	1.38838e+09	5.56127e+08	5.95797e+08	1.74898e+08	1.38166e+08	2.08089e+08	6.05464e+08	1.76539e+09	6.17004e+08	3.69374e+08	1.28959e+09	1.82225e+09	4.87946e+08	4.15005e+08	3.95971e+08
M131T338	trans-Cinnamate	131.049	338.4	148.052	0.10768	C9H8O2	[M+H-H2O]+			C00423	Metabolism of cofactors and vitamins; Biosynthesis of other secondary metabolites; Amino acid metabolism; Chemical structure transformation maps; Global and overview maps	140-10-3		BioDeepDB	2	pos	2.89567e+07	1.0709e+07	3.17836e+07	6.49933e+07	5.7137e+07	4.25784e+07	4.44766e+07	4.81826e+07	4.26619e+07	3.80182e+07	4.82101e+07	2.0334e+07	3.43616e+07	5.95171e+07	6.45225e+07	6.06694e+07	3.44361e+07	5.48318e+07	6.55793e+07	6.68572e+07	4.58133e+07	5.70811e+07	6.78878e+07	3.40685e+07
M284T279	Guanosine	284.098	279.1	283.092	2.73145	C10H13N5O5	[M+H]+	Purine nucleosides		C00387	Membrane transport; Global and overview maps; Nucleotide metabolism	118-00-3	HMDB0000133	BioDeepDB	2	pos	4.00307e+07	1.74868e+07	1.55775e+07	3.00375e+07	1.75172e+08	5.68664e+07	4.42601e+07	1.49001e+07	2.04405e+08	3.44777e+08	7.45776e+07	1.80364e+07	1.93847e+07	1.05252e+08	6.72897e+07	2.61965e+07	1.57504e+07	3.75008e+07	1.52607e+08	4.97485e+07	1.39481e+07	1.50727e+07	3.17637e+08	2.8293e+08
M127T335	Thymine	127.05	335	126.043	0.975991	C5H6N2O2	[M+H]+	Diazines	Pyrimidines and pyrimidine derivatives	C00178	Global and overview maps; Nucleotide metabolism	65-71-4	HMDB0000262	BioDeepDB	2	pos	2.84773e+06	9.63435e+06	6.46031e+06	6.74439e+06	2.8302e+06	7.30637e+06	5.42797e+06	2.38456e+06	2.55646e+06	2.2096e+06	7.38759e+06	2.66744e+06	3.25061e+06	2.76135e+06	1.03767e+07	8.74533e+06	9.18694e+06	1.00998e+07	1.16643e+07	1.01984e+07	1.23462e+07	9.71194e+06	8.67426e+06	1.02897e+07
M298T385	5'-Methylthioadenosine	298.095	385.2	297.09	5.95783	C11H15N5O3S	[M+H]+	5'-deoxyribonucleosides	5'-deoxy-5'-thionucleosides	C00170	Chemical structure transformation maps; Amino acid metabolism; Global and overview maps; Metabolism of terpenoids and polyketides	2457-80-9	HMDB0001173	BioDeepDB	2	pos	1.83941e+08	4.91936e+07	2.0777e+08	2.86944e+08	1.47361e+08	4.14576e+07	1.21522e+08	1.47067e+08	3.49608e+08	1.89541e+08	2.67455e+08	3.8266e+08	2.66202e+08	3.87109e+08	6.24302e+08	3.99118e+08	6.99613e+08	4.74161e+08	3.13377e+08	4.54392e+08	1.54785e+08	1.66199e+08	4.46561e+08	5.44556e+08
M166T338_2	L-Phenylalanine	166.086	338.4	165.079	0.0108691	C9H11NO2	[M+H]+			C00079	Cancer: overview; Membrane transport; Metabolism of other amino acids; Digestive system; Biosynthesis of other secondary metabolites; Translation; Amino acid metabolism; Chemical structure transformation maps; Global and overview maps	673-06-3		BioDeepDB	2	pos	6.46705e+09	5.81978e+09	2.78163e+09	7.6701e+09	6.27138e+09	1.10227e+09	4.54631e+09	2.65799e+09	1.02055e+10	4.76384e+09	4.87088e+09	4.47178e+09	2.13348e+09	6.89486e+09	5.26617e+09	6.88819e+09	3.6746e+09	6.3111e+09	5.6762e+09	2.7622e+09	3.76329e+09	3.83045e+09	5.48637e+09	6.21576e+09
M184T362	3,4-Dihydroxymandelic acid	184.17	362.4	184.037	0.238379	C8H8O5	[M]+			C05580	Amino acid metabolism; Global and overview maps	14883-87-5	HMDB0001866	BioDeepDB	2	pos	3.22674e+06	561197	3.37666e+06	3.35127e+06	618487	3.60521e+06	2.71734e+06	2.69037e+06	7.56531e+06	8.98905e+06	7.63885e+06	9.63977e+06	8.45549e+06	1.28034e+07	9.16359e+06	6.17626e+06	8.62023e+06	6.71369e+06	4.99638e+06	4.72133e+06	7.08932e+06	6.32867e+06	9.39966e+06	1.99165e+07
M415T802_2	Sodium deoxycholate	415.211	801.5	414.275	2.46027	C24H39O4. Na	[M+H]+			C11171		302-95-4		BioDeepDB	2	pos	2.70539e+08	1.51874e+08	2.4475e+08	2.63467e+08	3.25806e+08	1.29457e+08	2.7184e+08	1.53801e+08	1.48651e+08	3.58414e+08	3.16445e+08	2.34199e+08	1.49019e+08	7.96383e+07	3.1653e+08	1.81891e+08	2.16396e+08	2.61248e+08	2.07465e+08	3.4203e+08	2.66371e+08	2.01369e+08	1.54815e+08	2.00665e+08
M498T649	Taurocholic acid	498.29	649.3	515.292	10.9053	C26H45NO7S	[M+H-H2O]+	Steroids and steroid derivatives	Bile acids, alcohols and derivatives	C05122	Lipid metabolism; Metabolism of other amino acids; Global and overview maps; Digestive system	81-24-3	HMDB0000036	BioDeepDB	2	pos	5.55127e+06	1.78507e+06	3.0504e+06	4.76554e+06	1.78722e+06	2.11674e+06	3.16431e+06	3.5034e+06	3.90075e+06	4.28347e+06	3.3942e+06	2.29035e+06	2.22499e+06	2.6571e+06	5.65674e+06	3.10531e+06	2.15824e+06	3.68927e+06	2.39539e+06	1.51353e+06	3.78791e+06	3.9205e+06	2.73722e+06	2.49497e+06
M347T712	Corticosterone	347.221	711.9	346.214	3.09889	C21H30O4	[M+H]+	Steroids and steroid derivatives	Hydroxysteroids	C02140	Lipid metabolism; Neurodegenerative disease; Global and overview maps; Endocrine system	50-22-6	HMDB0001547	BioDeepDB	2	pos	3.73024e+06	2.98315e+06	2.7827e+06	8.66251e+06	5.61975e+06	8.25944e+06	8.33526e+06	8.45658e+06	5.54381e+06	5.81877e+06	6.96585e+06	9.34134e+06	7.00967e+06	3.81956e+06	1.04821e+07	2.82273e+06	1.05891e+07	9.67714e+06	9.90871e+06	1.04444e+07	2.61133e+06	6.56161e+06	6.12009e+06	7.63659e+06
M178T403	D-Gulono-1,4-lactone	178.134	402.7	178.048	1.42053	C6H10O6	[M]+			C05410		6322-07-2		BioDeepDB	2	pos	1.57933e+07	8.727e+06	1.9383e+07	2.50309e+07	1.33965e+07	1.27714e+07	1.57598e+07	1.20906e+07	2.6532e+07	1.16758e+07	4.1817e+07	3.62538e+07	1.40188e+07	1.13305e+07	1.41596e+07	6.46451e+06	9.13705e+06	1.90112e+07	1.79455e+07	1.4311e+07	1.69004e+07	8.13141e+06	1.7894e+07	1.13189e+07
M430T538_2	alpha-Tocopherol	430.242	538.2	430.381	1.82878	C29H50O2	[M]+	Prenol lipids	Quinone and hydroquinone lipids	C02477	Metabolism of cofactors and vitamins; Cell growth and death; Digestive system; Chemical structure transformation maps; Global and overview maps	59-02-9	HMDB0001893	BioDeepDB	2	pos	4.11394e+07	2.15022e+07	2.96662e+07	2.5671e+07	4.85769e+07	5.37977e+07	2.28592e+07	3.35496e+07	4.64086e+07	4.47615e+07	2.98398e+07	2.90908e+07	2.83365e+07	2.50156e+07	9.13245e+07	5.03561e+07	4.09444e+07	3.83891e+07	3.07937e+07	6.80395e+07	4.5259e+07	3.73518e+07	1.82533e+07	3.11546e+07
M243T565	Lumichrome	243.087	565.1	242.08	2.7809	C12H10N4O2	[M+H]+			C01727	Metabolism of cofactors and vitamins	1086-80-2		BioDeepDB	2	pos	1.56789e+08	5.56701e+07	1.2819e+08	1.84287e+08	1.06244e+08	5.9267e+07	1.03041e+08	7.39424e+07	1.50936e+08	1.78044e+08	1.03416e+08	1.32267e+08	1.33948e+08	8.92392e+07	1.75073e+08	1.41548e+08	1.32397e+08	1.66756e+08	1.44714e+08	1.91901e+08	1.24647e+08	1.83611e+08	1.17122e+08	1.07939e+08
M306T802	8,11,14-Eicosatrienoic acid	306.242	802	306.256	27.5627	C20H34O2	[M]+	Fatty Acyls	Fatty acids and conjugates	C03242	Lipid metabolism; Global and overview maps	1783-84-2	HMDB0002925	BioDeepDB	2	pos	8.08245e+06	1.0185e+07	5.41386e+06	8.1524e+06	6.92337e+06	6.41516e+06	5.05303e+06	4.45622e+06	8.37539e+06	9.35861e+06	8.41107e+06	3.46446e+06	4.55812e+06	6.75646e+06	3.01699e+06	7.01559e+06	3.8295e+06	1.11772e+07	4.58993e+06	5.80716e+06	8.1556e+06	8.03437e+06	4.0044e+06	6.62459e+06
M376T824	Lithocholic acid	376.314	824.4	376.298	3.81033	C24H40O3	[M]+	Lipids and lipid-like molecules	Steroids and steroid derivatives	C03990	Lipid metabolism; Digestive system	434-13-9	HMDB0000761	BioDeepDB	2	pos	5.86133e+06	7.68097e+06	9.64507e+06	6.24907e+06	6.20252e+06	4.79264e+06	1.05026e+07	8.53421e+06	1.0633e+07	9.39579e+06	6.79595e+06	1.10857e+07	1.01122e+07	1.02367e+07	6.9438e+06	5.15649e+06	7.05476e+06	9.85691e+06	5.71823e+06	9.37912e+06	7.56457e+06	9.23116e+06	8.91238e+06	1.25325e+07
M224T804	Methyl jasmonate	223.989	803.5	224.141	4.06368	C13H20O3	[M]+	Fatty Acyls	Lineolic acids and derivatives	C11512	Lipid metabolism; Global and overview maps	1211-29-6 / 39924-52-2	HMDB0036583	BioDeepDB	2	pos	4.04124e+08	3.06768e+08	2.80165e+08	3.537e+08	2.21267e+08	3.01977e+08	4.27149e+08	2.66057e+08	3.2467e+08	3.12907e+08	3.96565e+08	2.4097e+08	3.03967e+08	1.44572e+08	2.79332e+08	4.05614e+08	1.5449e+08	2.52842e+08	3.88838e+08	2.98034e+08	2.61032e+08	2.97762e+08	1.77735e+08	4.24441e+08
M273T744	Estradiol	273.253	744	272.178	2.07604	C18H24O2	[M+H]+	Steroids and steroid derivatives	Estrane steroids	C00951	Cancer: overview; Drug resistance: antineoplastic; Excretory system; Endocrine system; Lipid metabolism; Environmental adaptation; Cancer: specific types; Target-based classification: Nuclear receptors; Global and overview maps	50-28-2	HMDB0000151	BioDeepDB	2	pos	9.64016e+07	1.78862e+08	4.99329e+07	5.33928e+07	5.773e+07	8.21822e+07	1.81588e+08	6.39807e+07	1.07376e+08	8.75698e+07	2.6412e+08	7.75689e+07	9.99381e+07	1.05412e+08	1.00886e+08	6.07298e+07	1.71694e+08	1.17112e+08	1.63268e+08	1.25604e+08	1.20205e+08	7.16723e+07	9.12697e+07	6.83787e+07
M282T788	(6Z)-Octadecenoic acid	282.279	788.2	282.256	1.51304	C18H34O2	[M]+			C08363		593-39-5		BioDeepDB	2	pos	5.02567e+08	3.6335e+08	8.51824e+08	6.65985e+08	6.92966e+08	9.72036e+08	5.85043e+08	4.60559e+08	6.12374e+08	3.452e+08	2.51128e+08	1.24722e+09	2.61223e+08	2.88362e+08	4.86485e+08	1.07308e+09	1.57875e+09	6.29211e+08	3.10257e+08	8.38572e+08	5.03332e+08	1.0273e+09	4.21585e+08	4.32698e+08
M398T795_1	S-Adenosylmethionine	398.239	795.1	398.137	4.32188	C15H22N6O5S	[M]+			C00019	Biosynthesis of other secondary metabolites; Metabolism of terpenoids and polyketides; Amino acid metabolism; Folding, sorting and degradation; Chemical structure transformation maps; Global and overview maps	17176-17-9		BioDeepDB	2	pos	4.19374e+07	2.15082e+07	3.61055e+07	2.2575e+07	4.04476e+07	3.69786e+07	4.45856e+07	2.91444e+07	3.44784e+07	2.49294e+07	2.31167e+07	4.63068e+07	3.47714e+07	5.13616e+07	4.49663e+07	4.29034e+07	5.86507e+07	2.93192e+07	6.80503e+07	5.01566e+07	2.73025e+07	3.0203e+07	5.21569e+07	4.53236e+07
M155T798	Gentisic acid	154.99	798	154.027	1.0305	C7H6O4	[M+H]+	Benzene and substituted derivatives	Benzoic acids and derivatives	C00628	Amino acid metabolism; Xenobiotics biodegradation and metabolism; Global and overview maps	490-79-9	HMDB0000152	BioDeepDB	2	pos	2.46411e+08	1.49725e+08	4.40472e+08	1.66259e+08	4.28671e+08	5.96237e+08	2.00633e+08	2.65259e+08	3.76316e+08	3.46624e+08	3.97044e+08	2.34691e+08	2.72406e+08	2.5079e+08	1.28822e+08	1.65291e+08	3.13192e+08	5.04255e+08	3.10899e+08	3.66179e+08	1.56349e+08	2.00856e+08	2.17185e+08	2.81654e+08
M432T802_2	Isovitexin	432.236	801.6	432.106	7.42816	C21H20O10	[M]+			C01714	Biosynthesis of other secondary metabolites	38953-85-4 / 29702-25-8		BioDeepDB	2	pos	9.72127e+07	1.8035e+08	3.38095e+08	1.83584e+08	1.26142e+08	4.47072e+07	3.8277e+07	5.92256e+07	1.22122e+08	2.57914e+08	9.81614e+07	9.90596e+07	1.25221e+08	1.11553e+08	2.24681e+08	1.93382e+08	1.07583e+08	1.14652e+08	1.95586e+08	1.21879e+08	1.98594e+08	1.01439e+08	2.12094e+08	1.06279e+08
M145T815	3-Hydroxymethylglutaric acid	144.982	815.3	162.053	2.54713	C6H10O5	[M+H-H2O]+	Fatty Acyls	Fatty acids and conjugates	C03761		503-49-1	HMDB0000355	BioDeepDB	2	pos	1.62483e+07	5.70895e+07	4.06357e+07	7.02644e+07	3.42609e+07	2.96445e+07	5.288e+07	4.88684e+07	2.24502e+07	1.93197e+07	5.24529e+07	2.62661e+07	1.80534e+07	1.46152e+07	1.48459e+07	1.33316e+07	3.85809e+07	2.67046e+07	2.27114e+07	2.89673e+07	2.6004e+07	2.76745e+07	7.99644e+06	1.37244e+07
M112T73	Histamine	112.087	73.1	111.08	0	C5H9N3	[M+H]+	Organonitrogen compounds	Amines	C00388	Nervous system; Sensory system; Digestive system; Target-based classification: G protein-coupled receptors; Signaling molecules and interaction; Amino acid metabolism; Immune disease; Chemical structure transformation maps; Immune system; Global and overview maps	51-45-6	HMDB0000870	BioDeepDB	2	pos	4.82679e+07	3.48855e+06	1.48366e+07	1.10699e+07	1.39822e+07	2.93721e+07	1.85978e+07	3.61199e+07	2.61612e+07	1.18057e+07	1.30966e+07	5.4263e+07	1.40633e+07	3.04331e+07	3.84618e+07	2.76345e+07	9.04417e+07	1.34725e+07	1.1128e+07	5.05342e+07	1.48535e+07	2.01298e+07	2.19081e+07	1.30961e+07
M126T75	1-Methylhistamine	126.102	74.7	125.095	1.39569	C6H11N3	[M+H]+	Organonitrogen compounds	Amines	C05127	Amino acid metabolism; Global and overview maps	501-75-7	HMDB0000898	BioDeepDB	2	pos	1.91966e+08	1.17167e+08	1.87278e+08	1.08744e+08	2.07864e+08	1.5022e+08	1.35639e+08	1.42136e+08	1.97161e+08	1.98877e+08	1.38097e+08	9.26513e+07	1.75447e+08	1.44385e+08	1.91848e+08	1.41298e+08	1.94665e+08	2.02719e+08	1.88205e+08	1.01057e+08	1.32504e+08	1.05101e+08	2.2615e+08	8.93897e+07
M265T86	Thiamine	265.112	86.4	265.112	0.754398	C12H17N4OS	[M+H]+	Diazines	Pyrimidines and pyrimidine derivatives	C00378	Metabolism of cofactors and vitamins; Membrane transport; Digestive system; Folding, sorting and degradation; Global and overview maps	59-43-8	HMDB0000235	BioDeepDB	2	pos	8.95108e+06	5.84117e+06	7.91968e+06	9.15546e+06	5.29165e+06	1.22903e+07	5.2786e+06	5.41259e+06	2.65056e+07	3.46742e+07	2.3607e+07	2.95554e+07	2.70823e+07	2.44724e+07	3.30211e+07	7.32548e+06	2.60137e+07	1.82968e+07	1.43442e+07	1.64445e+07	3.05137e+07	2.65294e+07	4.08427e+07	3.76853e+07
M310T92	N-Acetyl-a-neuraminic acid	310.113	92.2	309.106	2.17985	C11H19NO9	[M+H]+	Organooxygen compounds	Carbohydrates and carbohydrate conjugates	C19909		21646-00-4	HMDB0000773	BioDeepDB	2	pos	5.63452e+07	8.66612e+07	4.88296e+07	6.55021e+07	1.06542e+08	1.14618e+08	4.72731e+07	9.7933e+07	7.98395e+07	8.72766e+07	1.05213e+08	8.91199e+07	9.70293e+07	9.39095e+07	9.18842e+07	9.98971e+07	6.36362e+07	6.4056e+07	5.89625e+07	7.2411e+07	5.75636e+07	5.63099e+07	5.10779e+07	6.10343e+07
M245T679	Etomidate	245.129	679.1	244.121	2.85564	C14H16N2O2	[M+H]+	Azoles	Imidazoles	C07522		33125-97-2	HMDB0014437	BioDeepDB	2	pos	3.19015e+06	6.935e+06	2.19287e+06	1.66465e+06	4.24453e+06	1.22451e+06	4.02668e+06	2.5759e+06	1.68586e+06	180819	2.97913e+06	2.38911e+06	1.42641e+06	4.06475e+06	3.23584e+06	883820	1.18513e+06	2.87904e+06	1.56429e+06	3.16333e+06	1.05139e+06	1.025e+06	2.3832e+06	545830
M146T115	Acetylcholine	146.118	115.2	146.118	0	C7H16NO2	[M+H]+	Organonitrogen compounds	Quaternary ammonium salts	C01996	Nervous system; Signal transduction; Sensory system; Endocrine system; Digestive system; Lipid metabolism; Neurodegenerative disease; Signaling molecules and interaction; Substance dependence; Cell motility	51-84-3	HMDB0000895	BioDeepDB	2	pos	2.06067e+07	9.91073e+07	1.39014e+07	1.57097e+07	1.25738e+07	1.09062e+07	1.50341e+07	1.41766e+07	9.49822e+06	1.53577e+07	1.85262e+07	8.56407e+06	8.80466e+06	8.26134e+06	8.85881e+06	1.06566e+07	1.68016e+07	1.02466e+07	1.3018e+07	1.37749e+07	1.10753e+07	1.02311e+07	2.13116e+07	1.14047e+07
M253T343	Deoxyinosine	253.093	342.9	252.086	0.395112	C10H12N4O4	[M+H]+	Purine nucleosides	Purine 2'-deoxyribonucleosides	C05512	Membrane transport; Global and overview maps; Nucleotide metabolism	890-38-0	HMDB0000071	BioDeepDB	2	pos	4.7576e+06	4.86499e+06	4.94647e+06	5.06805e+06	5.05679e+06	4.69843e+06	5.09441e+06	5.00567e+06	4.37906e+06	4.89835e+06	5.55674e+06	4.51033e+06	4.51111e+06	4.7459e+06	4.84102e+06	5.05503e+06	4.43661e+06	5.46081e+06	5.53712e+06	4.44233e+06	5.22671e+06	5.61151e+06	4.50243e+06	5.37306e+06
M180T353	beta-D-Glucosamine	180.088	353.3	179.079	7.35196	C6H13NO5	[M+H]+	Carbohydrates and carbohydrate conjugates	Aminosaccharides	C08349		14257-69-3/3416-24-8	HMDB0030091	BioDeepDB	2	pos	1.24371e+06	3.5657e+06	4.1621e+06	4.16668e+06	1.37125e+06	1.33478e+06	2.40472e+06	3.39112e+06	4.22702e+06	2.24433e+06	2.57835e+06	4.02623e+06	3.5522e+06	2.40199e+06	5.4624e+06	2.36557e+06	5.28029e+06	2.86826e+06	3.79599e+06	5.05126e+06	3.17336e+06	4.37339e+06	1.30852e+06	2.1397e+06
M148T116	O-Acetylserine	148.06	116.3	147.053	0.6754	C5H9NO4	[M+H]+	Carboxylic acids and derivatives	Amino acids, peptides, and analogues	C00979	Biosynthesis of other secondary metabolites; Metabolism of terpenoids and polyketides; Amino acid metabolism; Folding, sorting and degradation; Energy metabolism; Global and overview maps	5147-00-2	HMDB0003011	BioDeepDB	2	pos	3.44894e+07	2.12013e+07	3.10781e+07	6.49047e+06	5.0166e+07	2.79869e+07	4.31189e+07	2.54505e+07	1.20561e+07	1.14079e+07	1.18259e+07	1.13e+07	2.00703e+07	1.08315e+07	1.94946e+07	5.49076e+07	9.69465e+06	5.44584e+07	1.12132e+07	9.80684e+06	1.11886e+07	1.17898e+07	1.55051e+07	1.49746e+07
M348T119	AMP	348.069	118.8	347.063	4.52784	C10H14N5O7P	[M+H]+	Purine nucleotides	Purine ribonucleotides	C00020	Endocrine and metabolic disease; Drug resistance: antineoplastic; Signal transduction; Sensory system; Endocrine system; Neurodegenerative disease; Metabolism of terpenoids and polyketides; Nucleotide metabolism; Substance dependence; Chemical structure transformation maps; Global and overview maps	61-19-8	HMDB0000045	BioDeepDB	2	pos	9.41182e+08	1.20764e+07	1.12198e+07	1.47643e+09	1.28519e+09	9.88778e+08	1.26375e+07	9.43457e+06	1.15055e+07	1.25356e+09	1.02025e+07	1.2689e+08	1.184e+09	1.11599e+07	1.21955e+07	1.47636e+09	1.15265e+09	1.08302e+07	1.10866e+07	1.18177e+07	1.14782e+07	1.11129e+07	1.22824e+07	1.31571e+07
M268T125	Adenosine	268.104	125	267.097	0.74598	C10H13N5O4	[M+H]+	Purine nucleosides		C00212	Circulatory system; Membrane transport; Signal transduction; Endocrine system; Neurodegenerative disease; Signaling molecules and interaction; Nucleotide metabolism; Substance dependence; Global and overview maps	58-61-7	HMDB0000050	BioDeepDB	2	pos	1.17221e+08	1.29129e+08	1.22326e+08	1.57688e+08	1.3783e+08	4.52233e+07	1.3311e+08	1.40632e+08	1.62809e+08	1.91732e+08	1.30583e+08	1.8259e+08	9.78963e+07	1.09938e+08	1.56744e+08	8.88378e+07	1.54166e+08	1.18107e+08	1.05654e+08	1.8321e+08	1.39027e+08	1.45888e+08	1.20158e+08	1.39684e+08
M127T135	Maltol	127.039	135.5	126.032	2.36147	C6H6O3	[M+H]+	Pyrans	Pyranones and derivatives	C11918	Global and overview maps; Metabolism of terpenoids and polyketides	118-71-8	HMDB0030776	BioDeepDB	2	pos	3.56998e+07	2.91064e+07	3.23632e+07	3.45166e+07	4.0198e+07	4.72526e+07	3.96303e+07	3.78734e+07	4.51351e+07	4.37972e+07	4.44159e+07	3.42008e+07	3.79318e+07	3.59883e+07	3.27183e+07	4.14412e+07	4.0857e+07	4.57757e+07	4.22496e+07	3.83685e+07	4.1793e+07	3.75521e+07	4.28475e+07	5.57076e+07
M152T140	Guanine	152.057	139.7	151.049	0	C5H5N5O	[M+H]+	Imidazopyrimidines	Purines and purine derivatives	C00242	Global and overview maps; Nucleotide metabolism	73-40-5	HMDB0000132	BioDeepDB	2	pos	6.50261e+07	9.19298e+07	7.76416e+07	9.65631e+07	5.02251e+07	2.9216e+07	6.97712e+07	7.23194e+07	7.51959e+07	1.28393e+08	4.45178e+07	4.76492e+07	7.2049e+07	6.90849e+07	8.27525e+07	4.31899e+07	4.1345e+07	5.3467e+07	5.20011e+07	5.60749e+07	5.06348e+07	5.65834e+07	7.74848e+07	6.70899e+07
M123T140	Niacinamide	123.055	140.2	122.048	0	C6H6N2O	[M+H]+	Pyridines and derivatives	Pyridinecarboxylic acids and derivatives	C00153	Metabolism of cofactors and vitamins; Global and overview maps; Aging; Digestive system	98-92-0	HMDB0001406	BioDeepDB	2	pos	2.87926e+08	3.79976e+08	3.04705e+08	2.6817e+08	1.04928e+09	5.26395e+08	3.31225e+08	7.15925e+08	6.70907e+08	1.24989e+09	9.7701e+08	1.08887e+09	7.43054e+08	8.88636e+08	7.26703e+08	9.1028e+08	6.76307e+08	1.08189e+09	8.12798e+08	1.07693e+09	1.01628e+09	7.04492e+07	8.13485e+08	5.19753e+08
M194T142	Orciprenaline	194.118	141.6	211.121	21.2964	C11H17NO3	[M+H-H2O]+	Phenols	Benzenediols	C07144		586-06-1	HMDB0014954	BioDeepDB	2	pos	3.27847e+07	3.47325e+07	4.73745e+07	3.10301e+07	4.45548e+07	3.64783e+07	3.43828e+07	4.14991e+07	2.73904e+07	2.4522e+07	2.80656e+07	2.62125e+07	4.70822e+07	2.66429e+07	5.87005e+07	2.72865e+07	3.53835e+07	4.57586e+07	3.86874e+07	3.35147e+07	3.63991e+07	3.89696e+07	3.57807e+07	4.40486e+07
M348T146	3'-AMP	348.069	145.7	347.063	4.81514	C10H14N5O7P	[M+H]+	Ribonucleoside 3'-phosphates		C01367	Global and overview maps; Nucleotide metabolism	84-21-9	HMDB0003540	BioDeepDB	2	pos	6.46604e+06	3.50018e+06	5.07357e+06	5.81516e+06	5.05184e+06	6.31218e+06	6.42963e+06	6.74642e+06	7.84806e+06	7.28009e+06	9.20413e+06	5.7895e+06	7.08038e+06	7.76385e+06	6.53018e+06	4.72702e+06	6.30971e+06	6.90232e+06	5.51039e+06	6.41014e+06	4.603e+06	6.39957e+06	8.16425e+06	7.79102e+06
M153T318	3-Hydroxyanthranilate	153.041	318.1	153.043	13.0233	C7H7NO3	[M]+	Benzene and substituted derivatives	Benzoic acids and derivatives	C00632	Amino acid metabolism; Xenobiotics biodegradation and metabolism; Global and overview maps	548-93-6	HMDB0001476	mzCloud	2	pos	4.93982e+06	7.53102e+06	9.07308e+06	1.04305e+07	7.48403e+06	9.46958e+06	9.16465e+06	9.09695e+06	1.07467e+07	1.63124e+07	1.61533e+07	1.50035e+07	1.23693e+07	2.72989e+07	3.45564e+07	3.31819e+07	5.40575e+07	2.95014e+07	3.35664e+07	3.55005e+07	3.36422e+07	4.23666e+07	3.62974e+07	3.21581e+07
M118T399	Indole	118.065	399.3	117.058	0.84699	C8H7N	[M+H]+	Indoles and derivatives	Indoles	C00463	Amino acid metabolism; Biosynthesis of other secondary metabolites; Global and overview maps; Digestive system	120-72-9	HMDB0000738	BioDeepDB	2	pos	9.89603e+06	1.9311e+07	1.51961e+07	1.20514e+07	2.21078e+07	9.49513e+06	1.52821e+07	1.70663e+07	1.57661e+07	2.59248e+07	2.78625e+07	2.04606e+07	4.67451e+06	7.36744e+06	7.9042e+06	5.38216e+06	5.43333e+06	7.57229e+06	3.62651e+06	2.81792e+06	5.32008e+06	2.69222e+06	9.72397e+06	1.09346e+07
M213T705	Harmine	213.102	705.2	212.095	2.06007	C13H12N2O	[M+H]+	Harmala alkaloids		C06538	Chemical structure transformation maps	442-51-3	HMDB0030311	MoNA	2	pos	1.81979e+06	1.53245e+06	1.45954e+06	1.56215e+06	739322	572440	1.631e+06	1.48718e+06	1.06056e+06	760077	1.67461e+06	1.30812e+06	1.49712e+06	942363	733182	1.80105e+06	1.57829e+06	1.5605e+06	1.29713e+06	1.61934e+06	1.37952e+06	1.43414e+06	1.00068e+06	1.08499e+06
M129T76	1,1-Dimethylbiguanide	129.102	76.3	129.101	6.30352e-05	C4H11N5	[M]+	Organonitrogen compounds	Guanidines	C07151	Signal transduction; Aging; Digestive system	1115-70-4 / 657-24-9	HMDB0001921	BioDeepDB	2	pos	5.9316e+06	7.21027e+06	7.40007e+06	8.33103e+06	6.27985e+06	6.85402e+06	8.62644e+06	9.92856e+06	7.54322e+06	7.32887e+06	7.53332e+06	7.46959e+06	8.68829e+06	8.82643e+06	7.30505e+06	7.56801e+06	7.70792e+06	7.5441e+06	7.18697e+06	6.76583e+06	7.29281e+06	6.62322e+06	6.72901e+06	5.39851e+06
M335T767	Hydroxychloroquine	335.17	766.9	335.176	19.0948	C18H26ClN3O	[M]+	Quinolines and derivatives	Aminoquinolines and derivatives	C07043		118-42-3	HMDB0015549	BioDeepDB	2	pos	4.83996e+07	7.10011e+07	6.08288e+07	2.5032e+07	1.85614e+08	1.55388e+08	4.11869e+07	6.82078e+07	1.87388e+07	3.41466e+07	1.9931e+07	1.18068e+07	3.97928e+07	7.15296e+07	3.53414e+06	4.40128e+07	3.56021e+07	4.82111e+07	1.33506e+08	3.43938e+07	2.67368e+07	2.36995e+07	8.48964e+07	1.10286e+07
M194T313	3,4-Methylenedioxyamphetamine	194.117	313	193.11	0.162997	C11H15NO2	[M+H]+	Benzodioxoles		C07577		4764-17-4 / 42542-10-9	HMDB0041931	BioDeepDB	2	pos	2.1449e+08	1.48206e+08	1.42548e+08	1.82481e+08	1.88894e+08	1.26271e+08	3.06905e+08	1.927e+08	6.49319e+07	9.11692e+07	4.08703e+07	5.55438e+07	2.90394e+07	5.75928e+07	5.70015e+07	6.73802e+07	3.88386e+07	4.78941e+07	5.30034e+07	2.6409e+07	7.69126e+07	6.24792e+07	9.27612e+07	8.67178e+07
M135T742	Chavicol	135.08	741.6	134.073	0	C9H10O	[M+H]+	Phenols	1-hydroxy-2-unsubstituted benzenoids	C16930	Biosynthesis of other secondary metabolites	501-92-8	HMDB0034107	BioDeepDB	2	pos	4.68705e+06	2.67613e+06	1.12248e+07	4.25333e+06	1.51144e+07	1.62838e+07	3.87862e+06	1.00324e+07	1.3174e+07	3.56797e+06	7.71037e+06	7.25949e+06	6.34002e+06	3.10485e+06	4.27299e+06	5.37188e+06	4.53996e+06	2.01454e+07	9.18875e+06	9.78223e+06	6.26784e+06	4.53561e+06	2.54195e+06	6.08908e+06
M277T633	Cinchonidine	277.165	633	294.173	1.32051	C19H22N2O	[M+H-H2O]+	Cinchona alkaloids		C11379	Chemical structure transformation maps	485-71-2	HMDB0030282	BioDeepDB	2	pos	6.82305e+06	1.19174e+07	5.42065e+06	9.10777e+06	1.08804e+07	6.39021e+06	1.47801e+07	6.2945e+06	1.10316e+07	1.36798e+07	4.88324e+07	9.64736e+06	4.95178e+06	8.49513e+06	7.02362e+06	6.09312e+06	1.07889e+07	6.65363e+06	6.905e+06	7.32081e+06	8.84498e+06	5.14557e+06	9.36534e+06	1.52608e+07
M314T703	Progesterone	314.232	703	314.225	22.2766	C21H30O2	[M]+	Steroids and steroid derivatives	Pregnane steroids	C00410	Endocrine and metabolic disease; Cancer: overview; Cell growth and death; Endocrine system; Lipid metabolism; Cancer: specific types; Target-based classification: Nuclear receptors; Global and overview maps	57-83-0	HMDB0001830	BioDeepDB	2	pos	6.8566e+06	1.27252e+07	1.18057e+07	5.17581e+06	5.63971e+06	5.18186e+06	4.66477e+06	1.54612e+07	9.68523e+06	2.03068e+07	2.24352e+07	2.32091e+07	7.67627e+06	1.41967e+07	1.63044e+07	1.19455e+07	1.7245e+07	1.36569e+07	1.71601e+07	1.99943e+07	1.83015e+07	1.02434e+07	1.70961e+07	1.70333e+07
M319T698	5-KETE	319.226	698.4	318.219	3.99717	C20H30O3	[M+H]+	Fatty Acyls	Fatty acids and conjugates	C14732	Lipid metabolism	126432-17-5/106154-18-1	HMDB0010217	BioDeepDB	2	pos	2.21457e+06	9.29518e+06	6.99937e+06	1.6048e+06	6.14081e+06	5.3951e+06	4.15269e+06	1.08542e+07	1.86179e+07	7.08562e+06	4.50843e+06	3.72791e+06	1.02698e+07	5.0326e+06	8.38306e+06	6.60826e+06	3.98096e+06	4.18541e+06	6.12018e+06	8.00771e+06	5.35684e+06	5.6546e+06	6.47144e+06	1.6943e+07
M300T728	all-trans-Retinoic acid	300.2	727.9	300.209	29.98	C20H28O2	[M]+	Prenol lipids	Retinoids	C00777	Cancer: overview; Metabolism of cofactors and vitamins; Cancer: specific types; Immune system; Global and overview maps	302-79-4	HMDB0001852	BioDeepDB	2	pos	2.70309e+07	2.25456e+07	3.34282e+07	2.42557e+07	1.80195e+07	1.04971e+07	2.18966e+07	1.66791e+07	4.80234e+07	3.80875e+07	2.73977e+07	2.3994e+07	4.186e+07	3.88997e+07	3.9008e+07	5.15068e+07	3.9136e+07	5.0429e+07	2.62587e+07	3.53991e+07	3.30441e+07	2.74128e+07	2.11111e+07	3.62831e+07
M295T760	13-L-Hydroperoxylinoleic acid	295.216	759.8	312.23	21.5638	C18H32O4	[M+H-H2O]+	Fatty Acyls	Lineolic acids and derivatives	C04717	Lipid metabolism; Global and overview maps	33964-75-9	HMDB0003871	BioDeepDB	2	pos	2.10914e+07	3.72586e+07	1.95183e+07	1.96966e+07	1.54585e+07	2.01344e+07	2.01526e+07	2.01699e+07	4.7904e+07	2.6547e+07	6.9563e+07	3.20063e+07	2.19611e+07	4.53244e+07	2.7571e+07	1.00029e+07	2.29554e+07	4.50219e+07	3.0565e+07	3.4093e+07	1.807e+07	3.77874e+07	2.59453e+07	1.91396e+07
M316T717	Decanoyl-L-carnitine	316.247	717.4	315.241	0.977111	C17H33NO4	[M+H]+			C03299		3992-45-8	HMDB00651	BioDeepDB	2	pos	6.65114e+06	9.61546e+06	9.22814e+06	1.22387e+07	4.76817e+06	9.38378e+06	6.18769e+06	1.04829e+07	1.04068e+07	9.89873e+06	7.74644e+06	5.59413e+06	7.20674e+06	4.54714e+06	6.82753e+06	1.13307e+07	7.25125e+06	6.62897e+06	1.80388e+07	9.11304e+06	1.1197e+07	5.17327e+06	1.65967e+07	1.10785e+07
M199T770	12-Hydroxydodecanoic acid	199.169	770.3	216.173	22.2624	C12H24O3	[M+H-H2O]+	Hydroxy acids and derivatives	Medium-chain hydroxy acids and derivatives	C08317		505-95-3	HMDB0002059	BioDeepDB	2	pos	2.14391e+07	7.54895e+06	4.45108e+06	1.68851e+07	7.48725e+06	1.62182e+07	4.9661e+06	2.22742e+07	7.30246e+06	1.41145e+07	1.40871e+07	1.868e+07	1.8928e+07	1.20156e+07	1.04564e+07	1.39279e+07	1.60163e+07	5.85737e+06	1.37058e+07	6.67109e+06	2.18845e+07	1.35162e+07	9.10838e+06	1.24822e+07
M300T793_1	Sphingosine	300.289	792.5	299.282	2.25116	C18H37NO2	[M+H]+	Organonitrogen compounds	Amines	C00319	Lipid metabolism; Cell growth and death; Signal transduction; Global and overview maps	123-78-4	HMDB0000252	BioDeepDB	2	pos	3.72681e+07	9.29609e+06	2.03838e+07	4.66824e+06	1.63828e+07	5.08983e+07	9.17308e+07	8.82187e+06	9.87458e+06	3.28822e+07	4.09711e+07	9.9327e+06	1.57804e+07	2.63121e+06	1.87106e+07	2.60485e+07	9.45992e+06	1.25312e+07	9.14646e+06	3.19361e+06	3.62119e+07	1.81715e+07	1.88925e+07	6.28252e+06
M472T811_2	Maslinic acid	472.349	810.7	472.355	12.279	C30H48O4	[M]+	Prenol lipids	Triterpenoids	C16939		4373-41-5	HMDB0002392	BioDeepDB	2	pos	3.41703e+07	4.10884e+06	3.92606e+07	1.04564e+07	2.71824e+07	2.71408e+07	3.13892e+07	2.98955e+07	1.50889e+07	3.63206e+07	1.46521e+07	2.60217e+07	3.29381e+07	2.84368e+07	1.15233e+07	3.52513e+07	3.63048e+07	4.70837e+07	4.22465e+07	4.60479e+07	3.58627e+07	3.06147e+07	3.64992e+07	3.43927e+07
M130T817	Pyrrolidonecarboxylic acid	130.049	816.6	129.043	9.81172	C5H7NO3	[M+H]+	Carboxylic acids and derivatives	Amino acids, peptides, and analogues	C02237	Global and overview maps	4042-36-8	HMDB0000805	BioDeepDB	2	pos	9.92168e+07	7.91402e+07	9.90502e+07	9.76958e+07	7.31316e+07	8.28025e+07	1.03883e+08	8.23249e+07	8.53418e+07	7.04033e+07	1.05535e+08	9.50551e+07	1.01687e+08	1.34451e+08	9.85052e+07	8.6648e+07	1.22441e+08	1.19267e+08	1.06141e+08	7.35398e+07	1.0623e+08	4.32483e+07	7.92904e+07	1.81744e+08
M496T818	1-palmitoylglycerophosphocholine	496.327	817.8	496.34	25.588	C24H51NO7P	[M+H]+	Glycerophospholipids	Glycerophosphocholines	C04102		17364-16-8	HMDB0062541	BioDeepDB	2	pos	1.25318e+08	4.29411e+07	3.22504e+07	1.98954e+08	5.01733e+06	4.02639e+06	1.09825e+08	1.81005e+08	2.14449e+08	1.52001e+08	1.38996e+08	2.10887e+08	1.05282e+08	1.8023e+08	2.494e+08	1.17548e+08	1.45202e+08	7.65508e+07	1.71114e+07	2.75437e+08	1.28142e+08	1.97346e+08	8.93632e+07	3.60386e+08
M184T824	Phosphorylcholine	184.075	823.5	184.074	4.34606	C5H15NO4P	[M]+	Organonitrogen compounds	Quaternary ammonium salts	C00588	Lipid metabolism; Cancer: overview; Global and overview maps	3616-04-4/107-73-3	HMDB0001565	BioDeepDB	2	pos	1.22345e+07	1.94801e+07	1.02259e+07	3.04048e+07	8.03971e+06	3.58461e+06	4.50836e+06	5.53397e+06	2.18819e+07	4.06963e+07	2.33849e+07	4.21534e+07	7.88903e+06	2.66287e+07	2.24463e+07	1.31404e+07	2.62375e+07	2.19148e+07	8.17295e+06	3.0623e+07	2.30803e+07	2.92424e+07	2.49119e+07	1.57359e+07
M279T750	Sulfamethazine	279.092	750	278.084	4.38565	C12H14N4O2S	[M+H]+	Benzene and substituted derivatives	Benzenesulfonamides	C19530		57-68-1	HMDB0015522	mzCloud	2	pos	1.14861e+07	3.79291e+06	6.35474e+06	1.1567e+06	2.61574e+07	2.06124e+07	2.53642e+07	4.85415e+06	1.40489e+07	2.90883e+07	1.11551e+07	7.04548e+06	1.58048e+07	1.70389e+07	7.77817e+06	2.65724e+07	1.10199e+07	2.49769e+07	2.0262e+07	2.73309e+06	2.28986e+07	1.44398e+07	5.35356e+07	9.00479e+07
M136T139	Dopamine	136.076	139.4	153.079	29.6453	C8H11NO2	[M+H-H2O]+	Phenols	Benzenediols	C03758	Nervous system; Signal transduction; Digestive system; Endocrine system; Neurodegenerative disease; Biosynthesis of other secondary metabolites; Signaling molecules and interaction; Amino acid metabolism; Substance dependence; Cellular community - eukaryotes; Chemical structure transformation maps; Global and overview maps	62-31-7/51-61-6	HMDB0000073	MoNA	2	pos	1.15183e+07	1.01735e+07	4.80226e+06	1.09562e+07	2.3635e+07	1.07671e+07	2.19028e+07	1.0451e+07	3.63676e+07	3.36267e+07	3.41228e+07	3.42479e+07	2.95618e+07	4.19829e+07	3.50564e+07	4.01272e+07	4.75051e+07	3.45395e+07	4.30006e+07	2.65072e+07	4.42626e+07	4.59937e+07	2.1074e+07	2.90969e+07
M244T118	Cytidine	244.092	118.1	243.085	0.217093	C9H13N3O5	[M+H]+			C00475	Membrane transport; Global and overview maps; Nucleotide metabolism	65-46-3		BioDeepDB	2	pos	7.63772e+08	6.68108e+08	1.11101e+09	1.11621e+09	7.14717e+08	1.23709e+09	1.91498e+09	9.75822e+08	1.41013e+09	7.84686e+08	1.19075e+09	1.08626e+09	2.34171e+09	8.40228e+08	1.25871e+09	1.86155e+09	7.95725e+08	1.10451e+09	1.44557e+09	1.40399e+09	1.62702e+09	1.77493e+09	2.68186e+09	2.58623e+09
M102T815	Ethylmethylacetic acid	102.127	814.8	102.068	5.26925	C5H10O2	[M]+	Fatty Acyls	Fatty acids and conjugates	C18319	Digestive system	116-53-0	HMDB0002176	BioDeepDB	2	pos	2.86615e+07	1.81028e+07	2.32848e+07	3.77371e+07	1.8109e+07	3.30236e+06	1.27853e+07	1.09181e+07	3.72225e+07	2.12009e+07	1.06076e+07	1.59436e+07	1.15206e+07	2.63012e+07	2.13641e+07	1.76109e+07	2.32373e+07	2.06101e+07	1.10517e+07	1.11448e+07	2.71177e+07	2.68856e+07	3.0225e+07	1.34505e+07
M195T437	Caffeine	195.088	436.9	194.08	1.66079	C8H10N4O2	[M+H]+	Imidazopyrimidines	Purines and purine derivatives	C07481	Chemical structure transformation maps; Biosynthesis of other secondary metabolites; Global and overview maps	58-08-2	HMDB0001847	GNPS	2	pos	2.20446e+06	2.78235e+06	1.67692e+06	2.4705e+06	2.81359e+06	3.01913e+06	2.79368e+06	3.29763e+06	2.26793e+06	4.87052e+06	2.42875e+06	2.31877e+06	4.45461e+06	2.85151e+06	3.12019e+06	3.24461e+06	1.80882e+06	2.78496e+06	2.65337e+06	2.49055e+06	3.11036e+06	2.81966e+06	2.95925e+06	2.88716e+07
M153T629	N-Acetylhistamine	153.091	628.6	153.09	6.53205	C7H11N3O	[M]+	Carboxylic acids and derivatives	Carboxylic acid derivatives	C05135	Amino acid metabolism	673-49-4	HMDB0013253	MoNA	2	pos	4.94352e+06	2.42491e+06	2.7782e+06	4.68366e+06	2.6953e+06	2.99021e+06	6.54846e+06	4.09372e+06	6.31482e+06	2.2287e+06	3.02404e+06	6.61327e+06	5.11284e+06	4.72927e+06	9.54138e+06	4.58114e+06	3.13422e+06	6.01096e+06	3.96114e+06	7.7894e+06	4.96296e+06	4.4512e+06	5.29199e+06	5.32023e+06
M218T253	Propionylcarnitine	218.139	253.1	217.131	0.348402	C10H19NO4	[M+H]+	Fatty Acyls	Fatty acid esters	C03017		17298-37-2	HMDB0000824	MoNA	2	pos	4.82338e+07	3.46938e+07	4.39515e+07	4.27458e+07	3.56031e+07	5.00081e+07	5.397e+07	4.48237e+07	4.76492e+07	4.87802e+07	5.02991e+07	4.15125e+07	4.84974e+07	3.98403e+07	4.19178e+07	4.04077e+07	3.52524e+07	4.28849e+07	5.15984e+07	4.49115e+07	4.24191e+07	4.85657e+07	4.18338e+07	5.24126e+07
M464T310	Adenylsuccinic acid	464.079	310.5	463.074	4.90434	C14H18N5O11P	[M+H]+	Purine nucleotides	Purine ribonucleotides	C03794	Amino acid metabolism; Global and overview maps; Nucleotide metabolism	19046-78-7	HMDB0000536	MoNA	2	pos	1.0135e+07	7.82675e+06	6.95281e+06	6.52567e+06	8.32527e+06	5.00164e+06	6.61132e+06	6.79942e+06	8.0905e+06	8.99596e+06	1.04098e+07	6.80508e+06	8.43912e+06	6.45276e+06	7.63395e+06	7.9528e+06	7.07391e+06	9.41667e+06	8.63676e+06	6.03563e+06	7.94201e+06	7.11149e+06	8.02366e+06	8.63462e+06
M177T310	Serotonin	177.102	309.5	176.095	0.135515	C10H12N2O	[M+H]+	Indoles and derivatives	Tryptamines and derivatives	C00780	Nervous system; Signal transduction; Sensory system; Digestive system; Target-based classification: G protein-coupled receptors; Development and regeneration; Signaling molecules and interaction; Amino acid metabolism; Cellular community - eukaryotes; Chemical structure transformation maps; Global and overview maps	50-67-9	HMDB0000259	mzCloud	2	pos	1.86432e+06	1.16467e+06	1.81133e+06	2.3504e+06	2.15954e+06	93428.3	1.74545e+06	1.67749e+06	5.11303e+06	3.34314e+06	2.54805e+06	2.92517e+06	623198	959492	2.11793e+06	953899	1.49439e+06	879705	1.56702e+06	2.83096e+06	939841	1.0503e+06	618123	55843.5
M148T114	2-Hydroxyglutarate	148.043	113.8	148.037	1.05037	C5H8O5	[M]+	Hydroxy acids and derivatives	Short-chain hydroxy acids and derivatives	C02630	Carbohydrate metabolism; Global and overview maps	2889-31-8	HMDB0059655	BioDeepDB	2	pos	4.11104e+06	3.02719e+06	1.79721e+06	5.21912e+06	2.04447e+06	3.63806e+06	2.85169e+06	1.65587e+06	1.74447e+06	3.12069e+06	6.38894e+06	2.0491e+06	6.4118e+06	3.65566e+06	2.45835e+06	3.96949e+06	3.83909e+06	1.80716e+06	1.81399e+06	3.10423e+06	2.38218e+06	3.15721e+06	2.83826e+06	2.26077e+06
M288T632	L-Octanoylcarnitine	288.217	632.3	287.21	1.16027	C15H29NO4	[M+H]+	Fatty Acyls	Fatty acid esters	C02838		25243-95-2	HMDB0000791	MoNA	2	pos	5.45399e+06	5.40405e+06	6.27797e+06	2.57778e+06	5.44437e+06	2.20477e+06	5.65609e+06	5.9161e+06	2.89005e+06	8.05152e+06	7.18248e+06	7.1502e+06	9.28819e+06	3.13845e+06	3.4481e+06	2.69132e+06	8.57331e+06	9.3568e+06	6.80165e+06	3.03693e+06	3.1523e+06	7.35739e+06	8.28034e+06	1.14088e+07
M276T103	Saccharopine	276.119	102.6	276.132	0.495516	C11H20N2O6	[M]+	Carboxylic acids and derivatives	Amino acids, peptides, and analogues	C00449	Amino acid metabolism; Global and overview maps	997-68-2	HMDB0000279	BioDeepDB	2	pos	1.22175e+07	1.12577e+07	1.12874e+07	1.13388e+07	1.18423e+07	1.2494e+07	1.20434e+07	1.30388e+07	1.14528e+07	1.2691e+07	1.47708e+07	1.20729e+07	1.33584e+07	1.30771e+07	1.11262e+07	1.28434e+07	8.98127e+06	1.12184e+07	1.0598e+07	9.77274e+06	1.13353e+07	9.90747e+06	1.05893e+07	1.03383e+07
M170T824	Diphenylamine	170.096	823.6	169.089	0.141096	C12H11N	[M+H]+	Benzene and substituted derivatives	Anilines	C11016		122-39-4	HMDB0032562	MoNA	2	pos	2.15545e+07	2.46126e+07	1.32881e+07	4.6586e+07	1.10127e+07	4.68526e+06	5.88817e+06	7.16951e+06	5.76934e+07	5.1696e+07	3.31687e+07	2.79559e+07	1.05813e+07	4.05777e+07	2.95262e+07	1.71255e+07	4.22475e+07	1.66728e+07	2.99574e+07	4.34118e+07	3.89288e+07	2.23654e+07	4.21424e+07	2.53633e+07
M114T419	Epsilon-caprolactam	114.092	418.6	113.084	0.000341549	C6H11NO	[M+H]+	Lactams	Caprolactams	C06593	Xenobiotics biodegradation and metabolism; Global and overview maps	105-60-2	HMDB0062769	BioDeepDB	2	pos	4.25677e+07	1.6453e+07	2.94037e+07	4.08453e+07	1.22579e+07	2.03629e+07	1.7663e+07	2.81787e+07	3.12665e+07	3.88322e+07	3.53829e+07	5.05057e+07	4.44516e+07	4.21655e+07	2.76139e+07	1.19545e+07	2.16557e+07	1.5167e+07	2.65397e+07	2.16824e+07	5.33261e+07	3.05156e+07	5.91594e+07	1.14337e+07
M261T89	D-Glucose 1-phosphate	261.037	89	260.03	0.475028	C6H13O9P	[M+H]+	Organooxygen compounds	Carbohydrates and carbohydrate conjugates	C00103	Endocrine system; Carbohydrate metabolism; Lipid metabolism; Biosynthesis of other secondary metabolites; Metabolism of terpenoids and polyketides; Glycan biosynthesis and metabolism; Chemical structure transformation maps; Global and overview maps	59-56-3	HMDB0001586	mzCloud	2	pos	1.76341e+07	7.84379e+06	1.34016e+07	3.51389e+07	1.44194e+07	1.44517e+07	1.28784e+07	1.2434e+07	1.3033e+07	2.8479e+07	1.02051e+07	1.22495e+07	1.38954e+07	1.22303e+07	1.25231e+07	1.25344e+07	2.15795e+07	1.11723e+07	1.1781e+07	1.69371e+07	1.25784e+07	1.66262e+07	1.00109e+07	1.19659e+07
M146T397	8-Hydroxyquinoline	146.06	397.2	145.053	0.0432401	C9H7NO	[M+H]+			C19434		148-24-3		BioDeepDB	2	pos	3.20168e+06	1.03683e+07	1.34217e+07	1.76329e+07	8.6158e+06	1.0891e+06	1.50746e+07	5.12036e+06	1.74709e+07	2.07582e+06	1.43258e+07	4.85623e+06	1.5882e+07	1.09333e+07	1.45732e+07	1.34081e+07	3.92236e+06	1.33726e+07	2.44195e+06	6.99902e+06	1.22677e+07	2.19493e+07	1.76906e+07	2.51458e+07
M298T332	N7-Methylguanosine	298.114	331.5	298.115	2.34809	C11H16N5O5	[M]+	Purine nucleosides		C20674		20244-86-4	HMDB0001107	mzCloud	2	pos	1.76122e+07	3.99467e+07	5.15096e+06	3.07853e+07	2.09921e+07	1.72716e+07	2.68909e+07	2.12687e+07	2.02361e+07	1.78059e+07	2.54571e+07	1.62668e+07	1.75598e+07	1.50831e+07	1.3004e+07	3.70569e+07	3.28885e+07	3.49032e+07	4.8942e+07	3.35745e+07	2.90653e+07	3.09976e+07	4.53377e+06	3.44632e+06
M206T113	Diethylpropion	206.152	112.8	205.147	11.0404	C13H19NO	[M+H]+	Organooxygen compounds	Carbonyl compounds	C06954		c("90-84-6", "134-80-5")	HMDB0015072	mzCloud	2	pos	3.17135e+07	5.46114e+07	4.58868e+07	2.49476e+07	3.9848e+07	1.84199e+07	3.89232e+07	3.50064e+07	3.52614e+07	3.42599e+07	4.41992e+07	3.6729e+07	1.84281e+07	2.01822e+07	2.86382e+07	1.78895e+07	1.87269e+07	2.29518e+07	1.7904e+07	3.10017e+07	2.65437e+07	2.45678e+07	1.80498e+07	2.07814e+07
M277T115	(5-L-Glutamyl)-L-glutamate	277.103	115	276.096	0.0866104	C10H16N2O7	[M+H]+	Carboxylic acids and derivatives	Amino acids, peptides, and analogues	C05282		1116-22-9	HMDB0011737	mzCloud	2	pos	2.45995e+07	3.21311e+07	3.70483e+07	1.84415e+07	2.54636e+07	1.78134e+07	3.79014e+07	3.73693e+07	2.41178e+07	1.5772e+07	2.23482e+07	3.25212e+07	3.11657e+07	5.26918e+07	3.28639e+07	3.31612e+07	3.87024e+07	4.08462e+07	2.79548e+07	3.1896e+07	2.71549e+07	3.01739e+07	2.68293e+07	5.22468e+07
M123T125	4-Hydroxybenzaldehyde	123.044	125	122.037	1.82048	C7H6O2	[M+H]+	Organooxygen compounds	Carbonyl compounds	C00633	Chemical structure transformation maps; Xenobiotics biodegradation and metabolism; Global and overview maps	123-08-0	HMDB0011718	mzCloud	2	pos	8.86928e+06	2.76139e+07	7.17899e+06	1.13298e+07	1.82921e+07	9.85189e+06	1.20979e+07	7.30172e+06	1.24152e+07	1.52646e+07	1.44221e+07	1.02342e+07	2.21998e+07	1.11485e+07	1.52347e+07	9.40347e+06	1.42774e+07	9.3594e+06	3.07535e+07	1.11496e+07	9.32478e+06	9.88198e+06	8.67846e+06	2.65068e+07
M100T343	N-Methyl-2-pyrrolidinone	100.076	343.1	99.0684	0.759426	C5H9NO	[M+H]+	Extractables/Leachables; Industrial Chemicals; Textile Chemicals/Auxiliary/Dyes; Excipients/Additives/Colorants; Personal Care Products/Cosmetics		C11118		872-50-4		mzCloud	2	pos	4.2657e+06	602750	2.1928e+06	7.09583e+06	2.26015e+06	2.0245e+06	2.21375e+06	7.51918e+06	8.96531e+06	5.56269e+06	2.48335e+06	1.14558e+07	2.66258e+06	2.55072e+06	1.15972e+07	3.20554e+06	7.55324e+06	2.87759e+06	5.94276e+06	3.24239e+06	6.71275e+06	7.02584e+06	9.72929e+06	6.52917e+06
M189T366	Glycyl-leucine	189.123	366.3	188.116	0.93061	C8H16N2O3	[M+H]+	Carboxylic acids and derivatives	Amino acids, peptides, and analogues	C02155		869-19-2	HMDB0000759	mzCloud	2	pos	4.15259e+06	3.50341e+06	3.5757e+06	4.12161e+06	2.56243e+06	4.61953e+06	1.4297e+06	3.06141e+06	4.45325e+06	5.81256e+06	3.57863e+06	1.40949e+06	1.58012e+06	3.64924e+06	5.42413e+06	6.89512e+06	5.97329e+06	7.04303e+06	9.22107e+06	8.77574e+06	5.01725e+06	8.6439e+06	3.85707e+06	5.32803e+06
M250T745	Alprenolol	250.178	744.5	249.173	7.81438	C15H23NO2	[M+H]+	Therapeutics/Prescription Drugs		D07156				mzCloud	2	pos	7.42873e+07	5.92386e+07	6.78081e+07	9.24973e+07	1.15388e+08	6.44586e+07	8.52891e+07	9.747e+07	1.06335e+08	1.04077e+08	7.25106e+07	1.19636e+08	9.9578e+07	7.99079e+07	2.07008e+08	1.68856e+08	1.13111e+08	1.09258e+08	1.58323e+08	1.5938e+08	1.03213e+08	1.56802e+08	1.48847e+08	1.19852e+08
M119T105	Aminomalonic acid	119.016	104.8	119.022	3.38558	C3H5NO4	[M]+	Carboxylic acids and derivatives	Amino acids, peptides, and analogues	C00872		1068-84-4	HMDB0001147	BioDeepDB	2	pos	359897	179306	360770	341034	335604	260093	383657	333908	327568	348696	327602	351865	1.34207e+07	1.02956e+07	2.91098e+06	1.4946e+07	2.10087e+07	2.0345e+07	1.60635e+07	1.80832e+07	2.22841e+07	2.13085e+07	1.2673e+07	9.42917e+06
M168T92	3,4-Dihydroxymandelaldehyde	168.044	91.5	168.042	7.73609	C8H8O4	[M]+	Benzene and substituted derivatives	Phenylacetaldehydes	C05577	Amino acid metabolism; Global and overview maps	13023-73-9	HMDB0006242	BioDeepDB	2	pos	1.20383e+07	8.10064e+06	1.63764e+06	1.2573e+07	1.21646e+07	2.18297e+07	1.68018e+07	2.33444e+07	2.79703e+06	1.27548e+07	2.34311e+06	1.01624e+07	2.07825e+06	2.75571e+06	2.35455e+06	1.18033e+07	1.47465e+06	9.41227e+06	9.26083e+06	175845	8.47427e+06	7.09575e+06	1.31869e+07	1.17805e+07
M255T109_1	Nicotinamide riboside	255.097	108.7	255.098	0.00288623	C11H15N2O5	[M]+	Organooxygen compounds	Carbohydrates and carbohydrate conjugates	C03150	Metabolism of cofactors and vitamins; Global and overview maps; Aging	1341-23-7	HMDB0000855	BioDeepDB	2	pos	4.11226e+06	3.57559e+06	2.7532e+06	6.24951e+06	5.37013e+06	4.73768e+06	5.74878e+06	4.37129e+06	5.26969e+06	3.34727e+06	5.33467e+06	5.08906e+06	4.29081e+06	5.41463e+06	3.69617e+06	3.64212e+06	4.78396e+06	3.99096e+06	4.23743e+06	5.40921e+06	1.41908e+06	4.25267e+06	4.61028e+06	5.237e+06
M489T90_1	Citicoline	489.111	89.8	488.107	7.2395	C14H26N4O11P2	[M+H]+	Pyrimidine nucleotides	Pyrimidine ribonucleotides	C00307	Lipid metabolism; Cancer: overview; Global and overview maps	987-78-0	HMDB0001413	BioDeepDB	2	pos	2.22705e+07	1.20302e+07	2.93316e+07	3.73642e+07	2.54595e+07	1.60645e+07	1.34196e+07	3.02863e+07	3.28455e+07	2.28726e+07	1.78367e+07	3.06148e+07	3.33189e+07	4.28143e+07	3.37336e+07	1.45472e+07	3.86115e+07	2.08284e+07	3.80207e+07	3.99311e+07	3.15117e+07	2.28547e+07	3.49496e+07	4.29216e+07
M121T90	(S)-2-Phenyloxirane	121.07	90.4	120.058	5.68075	C8H8O	[M+H]+			C20782	Xenobiotics biodegradation and metabolism; Global and overview maps	20780-54-5		BioDeepDB	2	pos	1.8512e+07	1.43167e+07	1.64165e+07	1.24632e+07	1.71996e+07	1.10046e+07	1.509e+07	1.06999e+07	2.07523e+07	1.67627e+07	2.1267e+07	1.57537e+07	9.10723e+06	1.66355e+07	1.00386e+07	1.65063e+07	1.03124e+07	8.52397e+06	1.21887e+07	8.65146e+06	1.45383e+07	1.12539e+07	1.26962e+07	8.26884e+06
M289T126	N-Succinyl-2-amino-6-ketopimelate	289.085	126	289.08	18.1047	C11H15NO8	[M]+	Carboxylic acids and derivatives	Amino acids, peptides, and analogues	C04462	Amino acid metabolism; Global and overview maps		HMDB0012266	BioDeepDB	2	pos	1.25446e+06	1.36008e+07	1.37354e+07	2.08821e+06	996133	787393	1.36427e+06	1.05085e+06	6.0308e+06	3.0072e+07	2.42162e+06	8.06914e+06	5.53454e+06	8.09192e+06	1.16213e+07	8.42637e+06	1.6632e+07	2.2708e+06	1.09467e+07	1.34714e+07	1.4407e+07	4.02648e+07	1.8697e+07	8.53661e+06
M249T93	Pindolol	249.158	92.8	248.153	0.000585007	C14H20N2O2	[M+H]+	Indoles and derivatives	Indoles	C07445		13523-86-9	HMDB0015095	BioDeepDB	2	pos	6.71104e+06	5.8069e+06	5.55008e+06	6.49412e+06	9.57391e+06	6.67966e+06	9.15054e+06	6.77611e+06	1.08372e+07	1.07216e+07	1.01484e+07	7.13285e+06	6.67668e+06	6.70346e+06	8.15196e+06	7.72086e+06	1.04708e+07	1.05843e+07	1.01967e+07	7.73602e+06	1.33893e+07	1.47724e+07	1.60436e+07	1.18632e+07
M285T95	(S)-Coclaurine	285.127	94.6	285.137	3.20135	C17H19NO3	[M]+			C06161	Chemical structure transformation maps; Biosynthesis of other secondary metabolites; Global and overview maps	486-39-5		BioDeepDB	2	pos	1.81691e+07	1.53646e+07	1.71134e+07	1.25992e+07	1.95934e+07	7.29037e+06	1.96113e+07	1.73671e+07	6.86781e+06	1.30049e+07	4.37194e+06	3.54235e+06	799888	1.70322e+06	3.06549e+06	1.14523e+07	2.26009e+06	2.52639e+06	1.39584e+07	1.50592e+07	8.4573e+06	1.76044e+06	1.38187e+06	838707
M299T385	D-4'-Phosphopantothenate	299.099	385.1	299.077	2.59446	C9H18NO8P	[M-H2O+NH4]+	Carboxylic acids and derivatives	Amino acids, peptides, and analogues	C03492	Metabolism of cofactors and vitamins; Metabolism of other amino acids; Global and overview maps	5875-50-3	HMDB0001016	BioDeepDB	2	pos	1.27374e+07	8.40126e+07	3.95443e+07	6.71992e+07	4.15235e+07	2.48559e+07	6.37475e+07	4.38354e+07	5.82802e+06	5.35893e+06	6.77021e+07	6.50308e+06	7.23307e+07	5.89492e+07	5.84172e+06	4.24979e+07	5.71067e+07	5.61274e+06	4.6043e+07	1.53187e+07	1.34716e+07	3.90704e+07	4.5203e+06	6.10997e+06
M222T432	Allocystathionine	222.079	432.3	222.067	0.443795	C7H14N2O4S	[M]+	Carboxylic acids and derivatives	Amino acids, peptides, and analogues	C00542		535-34-2	HMDB0000455	BioDeepDB	2	pos	593321	502856	1.17803e+06	305927	619595	353397	1.62351e+06	1.11748e+06	765552	698010	417341	572817	468366	526187	674066	627898	688206	717333	1.28427e+06	471890	2.53269e+06	1.02159e+06	2.61798e+06	1.3264e+06
M127T101_2	1,2,3-Trihydroxybenzene	127.039	101.1	126.032	1.3854	C6H6O3	[M+H]+	Benzene and substituted derivatives	Phenols and derivatives	C01108	Xenobiotics biodegradation and metabolism; Global and overview maps; Target-based classification: Enzymes	87-66-1	HMDB0013674	BioDeepDB	2	pos	1.60847e+07	1.01239e+07	1.32224e+07	2.94013e+06	4.69889e+06	2.97469e+06	1.54986e+07	2.21652e+06	2.32484e+07	2.16173e+07	4.95051e+06	3.4281e+06	1.99181e+07	1.82246e+07	2.17282e+07	2.3267e+07	2.91071e+07	3.50444e+07	3.76939e+07	2.93937e+07	3.36351e+07	4.51321e+07	2.12238e+07	1.85977e+07
M276T242	4-Hydroxycinnamoylagmatine	276.145	242.5	276.159	2.67931	C14H20N4O2	[M]+	Cinnamic acids and derivatives	Hydroxycinnamic acids and derivatives	C04498	Amino acid metabolism; Global and overview maps	7295-86-5	HMDB0033460	BioDeepDB	2	pos	9.74788e+06	6.86161e+06	9.15136e+06	1.26846e+07	1.88789e+07	2.10309e+07	3.04327e+06	1.17889e+07	1.27903e+07	1.52013e+07	5.37274e+06	1.44696e+07	1.67098e+07	1.19987e+07	1.15868e+07	1.74506e+07	1.65129e+07	1.32236e+07	1.15608e+07	1.05053e+07	2.9707e+06	9.80467e+06	1.59916e+07	1.28783e+07
M175T103_2	N-Acetylornithine	175.108	103.4	174.1	0.0173305	C7H14N2O3	[M+H]+	Carboxylic acids and derivatives	Amino acids, peptides, and analogues	C00437	Amino acid metabolism; Global and overview maps	6205-08-9 / 2185-16-2	HMDB0003357	BioDeepDB	2	pos	2.10743e+07	2.14398e+07	1.99219e+07	2.10442e+07	2.22495e+07	1.99066e+07	2.00744e+07	2.14739e+07	1.99575e+07	2.42503e+07	2.68281e+07	2.09506e+07	2.77326e+07	1.96919e+07	1.89984e+07	2.50649e+07	1.94365e+07	2.12874e+07	2.00561e+07	2.041e+07	1.95873e+07	2.05949e+07	2.05817e+07	2.44561e+07
M146T104	2-Keto-6-aminocaproate	146.081	104.3	145.074	0.164292	C6H11NO3	[M+H]+	Keto acids and derivatives	Medium-chain keto acids and derivatives	C03239	Amino acid metabolism; Biosynthesis of other secondary metabolites; Global and overview maps		HMDB0012151	BioDeepDB	2	pos	2.34194e+08	1.42761e+08	1.32367e+08	2.93583e+08	1.0661e+08	1.00029e+08	1.77366e+08	1.53562e+08	1.76121e+08	1.70588e+08	1.27256e+08	1.6072e+08	1.274e+08	1.30149e+08	1.97943e+08	1.94929e+08	1.49856e+08	1.81492e+08	1.89696e+08	1.82057e+08	1.68267e+08	1.55935e+08	2.05235e+07	1.45018e+08
M236T104	Procaine	236.149	104.3	236.153	14.3977	C13H20N2O2	[M]+	Benzene and substituted derivatives	Benzoic acids and derivatives	C07375		59-46-1	HMDB0014859	BioDeepDB	2	pos	1.65038e+06	1.76273e+06	1.8962e+06	1.8694e+06	460164	1.30377e+06	460427	382973	1.66818e+06	2.19916e+06	1.16072e+06	339539	431191	1.25837e+06	1.76903e+06	621722	495933	2.0039e+06	1.51858e+06	1.61269e+06	1.94819e+06	2.0204e+06	1.92162e+06	2.35693e+06
M140T111	4-Amino-5-hydroxymethyl-2-methylpyrimidine	140.082	111.1	139.075	0.171328	C6H9N3O	[M+H]+			C01279	Metabolism of cofactors and vitamins; Global and overview maps; Membrane transport	73-67-6		BioDeepDB	2	pos	6.27382e+06	1.54998e+07	1.19096e+07	6.69966e+06	1.12925e+07	6.76179e+06	9.38218e+06	9.17912e+06	1.84463e+07	1.49368e+07	1.12309e+07	1.61122e+07	1.38873e+07	1.06794e+07	1.6136e+07	1.35752e+07	1.1944e+07	1.25574e+07	1.53392e+07	1.04401e+07	1.09116e+07	1.08236e+07	1.05502e+07	1.2453e+07
M175T113	2-Isopropyl-3-oxosuccinate	175.071	112.7	174.053	0.657333	C7H10O5	[M+H]+	Keto acids and derivatives	Short-chain keto acids and derivatives	C04236	Amino acid metabolism; Global and overview maps		HMDB0012149	BioDeepDB	2	pos	1.39558e+07	1.71886e+07	1.2766e+07	1.69516e+07	1.78503e+07	1.30128e+07	1.57806e+07	2.07959e+07	5.91802e+06	8.34046e+06	1.67796e+07	1.41571e+07	1.83061e+07	991160	1.11986e+07	1.51106e+07	1.07174e+07	2.84149e+07	8.72542e+07	3.12865e+07	1.86656e+07	1.66762e+07	1.61187e+07	1.87693e+07
M172T343	N-Butyryl-L-homoserine lactone	172.097	343.3	171.089	0.441612	C8H13NO3	[M+H]+			C11837	Cellular community - prokaryotes	67605-85-0		BioDeepDB	2	pos	3.14327e+06	3.03956e+06	4.65952e+06	8.13027e+06	6.75484e+06	2.25019e+06	7.78718e+06	2.21821e+06	1.93105e+06	2.15326e+06	2.7317e+06	2.95357e+06	1.9197e+06	9.48437e+06	1.77261e+06	2.46547e+06	6.27217e+06	6.74883e+06	5.00778e+06	4.71641e+06	8.5242e+06	9.10498e+06	1.98297e+06	5.3458e+06
M217T557	N-a-Acetylcitrulline	217.107	557.4	217.106	1.84241	C8H15N3O4	[M]+	Carboxylic acids and derivatives	Amino acids, peptides, and analogues	C15532	Amino acid metabolism; Global and overview maps	33965-42-3	HMDB0000856	BioDeepDB	2	pos	5.87016e+06	6.28434e+06	5.89495e+06	5.01062e+06	2.76022e+07	4.3764e+06	1.94433e+07	1.42527e+07	2.06415e+07	2.07335e+07	1.18705e+07	6.71215e+06	6.90545e+06	2.08624e+07	4.65816e+06	3.41308e+07	2.96431e+07	1.49952e+07	2.47192e+07	1.10971e+07	2.7699e+07	1.60121e+07	3.22366e+07	1.88179e+07
M113T118	3-Methyl-2-oxovaleric acid	113.054	118	130.063	14.7363	C6H10O3	[M+H-H2O]+	Keto acids and derivatives	Short-chain keto acids and derivatives	C03465		1460-34-0	HMDB0000491	BioDeepDB	2	pos	4.62949e+07	2.12564e+07	3.17115e+07	5.21826e+06	3.27348e+07	2.24048e+07	4.27017e+07	3.50309e+07	2.53688e+06	1.97973e+06	5.11254e+06	1.73388e+07	2.76004e+07	1.83531e+06	2.43528e+07	3.66113e+07	3.83192e+06	4.24116e+07	4.71283e+06	2.91902e+06	3.28434e+06	3.63843e+06	2.9227e+06	1.76374e+06
M162T120	Aminoadipic acid	162.076	119.6	161.069	0.00314011	C6H11NO4	[M+H]+	Carboxylic acids and derivatives	Amino acids, peptides, and analogues	C00956	Amino acid metabolism; Biosynthesis of other secondary metabolites; Global and overview maps	542-32-5 / 1118-90-7	HMDB0000510	BioDeepDB	2	pos	1.53409e+07	2.87779e+07	6.29976e+06	4.92522e+07	1.40047e+07	6.85571e+06	4.17018e+07	2.359e+07	1.62591e+07	1.09417e+07	2.34795e+07	1.52434e+07	2.95482e+07	1.95679e+07	2.50009e+07	6.24122e+06	1.18045e+07	2.28735e+07	2.65322e+07	1.52787e+07	2.48562e+07	1.32855e+07	2.54731e+07	1.12161e+07
M114T338	1-Pyrroline-2-carboxylic acid	114.065	338.2	113.048	11.1221	C5H7NO2	[M+H]+	Pyrrolines		C03564	Amino acid metabolism	2139-03-9	HMDB0006875	BioDeepDB	2	pos	4.35211e+06	3.83599e+06	5.11435e+06	3.47687e+06	1.18858e+06	2.3112e+07	7.32886e+06	4.44729e+06	2.20403e+06	3.48141e+06	2.85538e+06	4.74711e+06	1.94343e+08	1.68817e+08	2.10716e+08	2.93562e+08	4.55387e+08	3.15652e+08	2.90288e+08	3.04082e+08	3.71873e+08	3.41057e+08	3.38632e+08	2.22836e+08
M104T122	2-Hydroxybutyric acid	104.053	121.7	104.047	2.77606	C4H8O3	[M]+	Hydroxy acids and derivatives	Alpha hydroxy acids and derivatives	C05984	Carbohydrate metabolism	600-15-7 / 3347-90-8	HMDB0000008	BioDeepDB	2	pos	7.1688e+06	8.82872e+06	6.68446e+06	8.18169e+06	5.9623e+06	5.09697e+06	6.88985e+06	4.42132e+06	6.94645e+06	5.41588e+06	6.88875e+06	7.0323e+06	5.71049e+07	3.50124e+07	8.98592e+07	8.54964e+07	2.16873e+08	1.17818e+08	6.18494e+07	1.03329e+08	9.0702e+07	8.16856e+07	8.48713e+07	8.15947e+07
M133T122	5,6-Dihydro-5-fluorouracil	133.032	121.7	132.034	0.452293	C4H5FN2O2	[M+H]+	Diazines	Pyrimidines and pyrimidine derivatives	C16630	Xenobiotics biodegradation and metabolism	696-06-0	HMDB0060402	BioDeepDB	2	pos	3.44547e+06	1.36682e+08	1.0522e+08	2.15948e+06	3.81966e+06	1.93419e+07	1.23609e+08	1.06346e+08	8.35941e+07	1.50954e+06	1.27873e+08	6.02552e+07	1.52774e+07	9.58246e+07	1.0321e+08	4.67424e+06	3.37877e+06	1.24643e+08	1.14957e+08	1.316e+08	1.04988e+08	1.18093e+08	1.14707e+08	1.00277e+08
M193T122	5,6-Dihydroxy-3-methyl-2-oxo-1,2,5,6-tetrahydroquinoline	193.067	121.9	193.074	3.23063	C10H11NO3	[M]+			C06726				BioDeepDB	2	pos	2.32328e+07	4.43112e+07	1.39847e+07	1.98167e+07	2.34308e+07	1.36024e+07	1.66494e+06	1.96124e+07	3.50288e+07	9.03497e+07	3.60123e+07	3.96097e+07	4.06762e+07	6.3128e+07	3.68561e+07	4.07828e+07	2.24971e+07	8.51389e+07	2.66916e+07	2.65705e+07	5.75002e+07	8.64394e+07	8.46594e+07	6.90893e+07
M172T314	Tetrahydrodipicolinate	172.06	313.9	171.053	0.0379562	C7H9NO4	[M+H]+	Carboxylic acids and derivatives	Amino acids, peptides, and analogues	C03972	Amino acid metabolism; Biosynthesis of other secondary metabolites; Global and overview maps	2353-17-5	HMDB0012289	BioDeepDB	2	pos	4.76425e+06	4.35616e+06	4.489e+06	4.89064e+06	4.33184e+06	5.23782e+06	3.83698e+06	3.63415e+06	5.05422e+06	3.55299e+06	3.89819e+06	4.9283e+06	3.55791e+06	4.43587e+06	4.5355e+06	4.54574e+06	4.77653e+06	3.47426e+06	4.31793e+06	3.92516e+06	4.62005e+06	4.77724e+06	4.18103e+06	4.88847e+06
M165T124	2-Hydroxycinnamic acid	165.054	124.3	164.047	0.447592	C9H8O3	[M+H]+	Cinnamic acids and derivatives	Hydroxycinnamic acids and derivatives	C01772	Amino acid metabolism; Biosynthesis of other secondary metabolites; Global and overview maps	583-17-5 / 614-60-8	HMDB0002641	BioDeepDB	2	pos	3.44867e+07	3.71684e+08	2.50334e+08	2.30736e+08	2.878e+08	4.25479e+08	6.69928e+08	5.06608e+08	4.17148e+08	3.95438e+08	9.00232e+07	4.29325e+08	8.93873e+07	2.82914e+08	5.92193e+08	1.05909e+08	2.56134e+08	3.16365e+08	4.1589e+08	9.22155e+08	4.33017e+08	6.58018e+08	8.72989e+07	4.97506e+08
M140T405	Acetylphosphate	139.984	404.6	139.988	11.4935	C2H5O5P	[M]+	Organic phosphoric acids and derivatives	Phosphate esters	C00227	Carbohydrate metabolism; Energy metabolism; Metabolism of other amino acids; Global and overview maps	590-54-5	HMDB0001494	BioDeepDB	2	pos	5.25931e+07	2.4928e+07	2.57131e+07	7.88288e+06	1.78747e+07	1.84298e+07	4.90161e+07	2.14547e+07	1.41009e+07	6.94221e+06	4.67838e+07	8.16606e+06	1.51395e+07	7.94869e+06	9.50975e+06	1.03997e+07	9.90866e+06	1.55982e+07	7.62447e+06	7.73833e+06	8.39303e+06	8.30585e+06	2.22312e+07	8.13613e+06
M219T139	gamma-Glutamylalanine	219.097	139.3		1.29385	C7H11N2O5R	[M+H]+	Carboxylic acids and derivatives	Amino acids, peptides, and analogues	C03740	Metabolism of other amino acids; Global and overview maps	5875-41-2	HMDB0006248	BioDeepDB	2	pos	285189	508251	276604	582538	1.1898e+06	1.03338e+06	62257.8	563137	703536	829384	877927	824905	1.45394e+06	2.46035e+06	1.53691e+06	2.41137e+06	588012	712019	886984	1.32314e+06	853944	819704	480803	911198
M131T155	5-Amino-2-oxopentanoic acid	131.053	155.3	131.058	2.66992	C5H9NO3	[M]+	Keto acids and derivatives	Short-chain keto acids and derivatives	C01110	Amino acid metabolism; Global and overview maps		HMDB0006272	BioDeepDB	2	pos	8.55002e+06	5.24931e+06	7.42298e+06	6.18989e+06	6.52317e+06	6.94357e+06	5.10894e+06	7.14233e+06	5.78733e+06	6.16224e+06	7.25764e+06	6.24522e+06	7.13274e+06	6.24427e+06	6.82698e+06	6.20228e+06	8.46463e+06	4.89847e+06	7.62046e+06	7.73478e+06	5.51731e+06	6.56478e+06	6.67848e+06	6.37206e+06
M193T173	3-Carbamoyl-2-phenylpropionaldehyde	193.068	172.6	193.074	0.611175	C10H11NO3	[M]+	Benzene and substituted derivatives	Phenylacetaldehydes	C16587	Xenobiotics biodegradation and metabolism		HMDB0060366	BioDeepDB	2	pos	4.48467e+06	3.69526e+06	1.16962e+06	4.32382e+06	4.15664e+06	843280	1.17278e+06	4.54808e+06	5.67403e+06	5.85042e+06	6.84614e+06	5.6779e+06	6.2256e+06	4.87056e+06	6.54274e+06	5.97353e+06	6.29576e+06	6.56922e+06	6.18101e+06	8.25718e+06	8.6946e+06	7.91311e+06	7.0164e+06	6.46752e+06
M153T256	FAPy-adenine	153.066	256.1	153.065	0.0940884	C5H7N5O	[M]+	Diazines	Pyrimidines and pyrimidine derivatives	C06502		5122-36-1	HMDB0004816	BioDeepDB	2	pos	9.181e+06	1.00637e+07	9.5978e+06	8.49928e+06	1.12725e+07	9.60167e+06	7.00815e+06	9.88806e+06	1.03056e+07	9.37552e+06	1.09401e+07	1.15454e+07	9.87309e+06	8.7302e+06	8.28823e+06	7.95418e+06	8.22464e+06	1.02337e+07	1.03211e+07	8.53542e+06	1.0358e+07	7.97066e+06	9.74441e+06	9.76745e+06
M152T303	3,4-Dihydroxyphenylacetaldehyde	152.057	302.5	152.047	0.245189	C8H8O3	[M]+	Benzene and substituted derivatives	Phenylacetaldehydes	C04043	Amino acid metabolism; Neurodegenerative disease; Biosynthesis of other secondary metabolites; Global and overview maps	5707-55-1	HMDB0003791	BioDeepDB	2	pos	240924	253095	290841	338080	972417	210513	373715	408694	1.16126e+06	1.09518e+06	382049	339541	306201	902317	1.07759e+06	806856	345010	677521	1.3297e+06	1.20995e+06	1.27096e+06	1.1699e+06	336272	302490
M137T306	allopurinol	137.046	306.4	136.039	0.045821	C5H4N4O	[M+H]+			C06816		315-30-0		BioDeepDB	2	pos	2.61188e+07	4.80091e+07	4.80089e+07	3.51168e+07	4.96507e+07	3.7304e+07	5.06179e+07	4.86264e+07	4.39758e+07	8.86262e+07	3.5175e+07	4.1406e+07	3.37832e+07	2.88758e+07	5.33611e+07	4.84573e+07	4.1244e+07	3.11444e+07	4.16294e+07	3.69972e+07	5.21728e+07	3.94108e+07	3.51981e+07	5.08819e+07
M271T308	Medicarpin	271.093	307.5	270.089	11.8023	C16H14O4	[M+H]+			C10503	Chemical structure transformation maps; Biosynthesis of other secondary metabolites; Global and overview maps	32383-76-9		BioDeepDB	2	pos	2.15304e+07	2.89697e+06	1.65715e+07	3.26272e+06	5.93379e+06	2.65262e+06	1.05239e+07	2.43646e+07	5.7732e+06	2.58087e+07	9.75644e+06	3.12496e+06	2.46167e+07	3.1426e+06	9.1034e+06	1.76258e+07	1.41477e+07	6.13855e+06	6.60342e+06	8.01777e+06	3.07004e+06	3.78317e+06	2.10537e+06	2.5251e+06
M226T323	2-Amino-2-deoxyisochorismate	226.071	323.1	225.064	0.778517	C10H11NO5	[M+H]+			C18054	Biosynthesis of other secondary metabolites; Global and overview maps; Metabolism of terpenoids and polyketides			BioDeepDB	2	pos	1.48775e+07	1.30245e+07	1.61633e+07	1.30584e+07	1.42521e+07	1.22108e+07	1.42169e+07	1.32219e+07	1.67708e+07	1.60054e+07	1.7648e+07	1.17433e+07	2.0729e+07	2.08511e+07	2.25895e+07	2.09034e+07	2.3228e+07	2.459e+07	3.07004e+07	3.12778e+07	2.56442e+07	2.86554e+07	2.59432e+07	2.70968e+07
M182T327	Beta-Tyrosine	182.081	327.5	181.074	0.0248639	C9H11NO3	[M+H]+	Carboxylic acids and derivatives	Amino acids, peptides, and analogues	C04368	Amino acid metabolism		HMDB0003831	BioDeepDB	2	pos	9.39895e+06	2.00029e+07	8.17579e+06	2.33848e+07	1.08326e+07	9.58619e+06	8.28687e+06	6.14654e+06	8.36281e+06	1.24298e+07	9.94513e+06	9.16879e+06	5.81349e+06	1.05274e+07	1.01162e+07	6.9051e+06	4.0994e+06	6.71375e+06	4.03578e+06	4.43728e+06	3.96544e+06	3.11834e+06	7.03812e+06	1.36886e+07
M151T330	Acetaminophen	151.062	329.7	151.063	0.472566	C8H9NO2	[M]+	Phenols	1-hydroxy-2-unsubstituted benzenoids	C06804	Digestive system	103-90-2	HMDB0001859	BioDeepDB	2	pos	1.53391e+06	4.97047e+06	4.5822e+06	1.87444e+06	5.34706e+06	4.23264e+06	7.80871e+06	7.06074e+06	3.70687e+06	4.0812e+06	2.41739e+06	4.61732e+06	4.40196e+06	3.33856e+06	9.70202e+06	4.51155e+06	5.46524e+06	4.31521e+06	4.3853e+06	5.09624e+06	3.50221e+06	3.21771e+06	1.05547e+07	1.08078e+07
M166T332	7-Methylguanine	166.073	331.5	165.065	0.0128986	C6H7N5O	[M+H]+	Imidazopyrimidines	Purines and purine derivatives	C02242		578-76-7	HMDB0000897	BioDeepDB	2	pos	6.08367e+06	6.56975e+06	5.3349e+06	5.47232e+06	6.51445e+06	5.71199e+06	7.28642e+06	7.13413e+06	5.42472e+06	4.62068e+06	5.89436e+06	4.2323e+06	5.83932e+06	5.07803e+06	3.06083e+06	5.67266e+06	5.95956e+06	6.8558e+06	7.73971e+06	5.71601e+06	6.68407e+06	6.22496e+06	6.16055e+06	4.26459e+06
M107T338	Benzaldehyde	107.049	338.4	106.042	0.224196	C7H6O	[M+H]+	Benzene and substituted derivatives	Benzoyl derivatives	C00261	Xenobiotics biodegradation and metabolism; Global and overview maps	100-52-7	HMDB0006115	BioDeepDB	2	pos	7.16382e+06	5.14224e+06	7.54724e+06	6.76657e+06	6.37672e+06	6.98636e+06	5.67794e+06	7.33412e+06	6.13575e+06	5.27645e+06	7.26133e+06	6.45938e+06	7.4853e+06	6.10814e+06	6.56198e+06	6.21558e+06	6.94425e+06	4.2867e+06	6.61432e+06	6.93967e+06	4.44379e+06	5.9432e+06	5.92861e+06	6.66123e+06
M168T339	D-synephrine	168.091	338.6	167.095	0.485092	C9H13NO2	[M+H]+	Benzene and substituted derivatives	Phenols	C01869		614-35-7	HMDB0062811	BioDeepDB	2	pos	3.80286e+06	1.13452e+07	1.09744e+07	5.1264e+06	1.16892e+07	1.29193e+07	1.51608e+07	1.45185e+07	1.35222e+07	1.57382e+07	9.02803e+06	1.0447e+07	1.65386e+07	8.92982e+06	2.64071e+07	1.93148e+07	9.91907e+06	1.67794e+07	1.79474e+07	1.74518e+07	1.21976e+07	1.31357e+07	2.60119e+07	2.95312e+07
M413T392_4	6-Amino-6-deoxyfutalosine	413.139	391.9	413.134	14.2809	C19H19N5O6	[M]+			C20773	Metabolism of cofactors and vitamins; Global and overview maps			BioDeepDB	2	pos	1.6997e+06	7.17494e+06	1.00769e+06	1.36328e+07	985923	954195	1.70178e+07	1.78395e+07	1.0252e+07	2.00001e+07	8.0732e+06	1.50103e+07	1.98321e+06	2.29915e+06	1.80918e+07	3.3075e+06	3.65459e+07	6.10474e+06	1.6502e+07	3.58822e+07	7.4536e+06	6.58613e+06	5.39056e+07	1.49935e+07
M221T347	Pyrimidodiazepine	221.092	347.4	221.091	1.27121	C9H11N5O2	[M]+			C02587	Metabolism of cofactors and vitamins			BioDeepDB	2	pos	2.14852e+07	7.24268e+07	5.40863e+06	1.25992e+07	1.37297e+07	1.22039e+07	1.58343e+07	1.36712e+07	2.07551e+06	4.46227e+06	6.31692e+06	729927	2.11398e+06	1.06824e+06	4.43093e+06	2.6074e+06	1.43521e+07	1.78536e+06	9.48828e+06	1.79557e+06	430507	485980	929931	310409
M169T350	Pyridoxamine	169.097	349.6	168.09	0.0350261	C8H12N2O2	[M+H]+	Pyridines and derivatives	Pyridoxamines	C00534	Metabolism of cofactors and vitamins; Global and overview maps; Digestive system	85-87-0	HMDB0001431	BioDeepDB	2	pos	1.14046e+06	2.16428e+06	4.66905e+06	3.69478e+06	2.73488e+06	4.19274e+06	3.0484e+06	1.21278e+06	1.14271e+06	3.06042e+06	4.29178e+06	7.11216e+06	1.17137e+07	1.51463e+07	1.43882e+07	1.7091e+07	2.47372e+07	1.75178e+07	1.87024e+07	2.15884e+07	2.84127e+07	2.58328e+07	2.44016e+07	2.45045e+07
M209T366	Pilocarpine	209.128	366.4	208.121	0.0537427	C11H16N2O2	[M+H]+			C07474	Chemical structure transformation maps; Global and overview maps	54-71-7 / 92-13-7	HMDB0015217	BioDeepDB	2	pos	5.89021e+06	4.65346e+06	5.13642e+06	5.22203e+06	6.20396e+06	3.55309e+06	8.59802e+06	276952	3.35682e+06	3.51855e+06	2.32957e+06	3.88642e+06	3.44181e+06	1.67124e+06	2.46418e+06	4.10758e+06	5.56714e+06	5.03066e+06	5.84465e+06	8.21033e+06	4.42258e+06	4.50242e+06	8.11305e+06	1.94174e+06
M232T379	Butyryl-L-carnitine	232.154	378.6	231.147	3.57951e-05	C11H21NO4	[M+H]+			C02862		25576-40-3	HMDB02013	BioDeepDB	2	pos	1.364e+08	8.46814e+07	1.55791e+08	1.36797e+07	1.55288e+08	9.1577e+07	2.04079e+08	1.12966e+08	5.6712e+07	5.38559e+06	1.2631e+07	1.08882e+07	8.95577e+07	5.23613e+06	5.46568e+07	1.45266e+08	4.62025e+06	2.19685e+08	8.6372e+07	3.94083e+07	3.10361e+07	7.981e+06	7.51078e+06	1.38949e+07
M244T373	Ribavirin	244.081	372.8	244.081	2.1734	C8H12N4O5	[M]+			C07234		36791-04-5		BioDeepDB	2	pos	2.71829e+06	8.05255e+06	1.06145e+07	6.06489e+06	1.03017e+07	8.66043e+06	1.10628e+07	7.4021e+06	1.1048e+07	1.22067e+07	1.06597e+07	8.15326e+06	1.10064e+07	1.06588e+07	1.23459e+07	9.47719e+06	1.03468e+07	1.02988e+07	1.2095e+07	9.06823e+06	1.05563e+07	1.01709e+07	7.36919e+06	9.09185e+06
M161T428	Tryptamine	161.107	427.8	160.1	0.0287467	C10H12N2	[M+H]+	Indoles and derivatives	Tryptamines and derivatives	C00398	Biosynthesis of other secondary metabolites; Signaling molecules and interaction; Amino acid metabolism; Chemical structure transformation maps; Global and overview maps	61-54-1	HMDB0000303	BioDeepDB	2	pos	3.03427e+06	4.97315e+06	5.09521e+06	2.66967e+06	1.30841e+06	3.10981e+06	8.36759e+06	1.1811e+06	1.26913e+06	1.14474e+06	854054	4.43822e+06	1.84546e+06	1.90523e+06	1.09126e+06	2.37763e+06	4.34219e+06	5.68299e+06	2.22225e+06	1.85938e+06	1.83944e+06	517240	2.87534e+06	894552
M480T649	26-Hydroxyecdysone	480.275	649.2	480.309	5.13708	C27H44O7	[M]+			C16499	Metabolism of terpenoids and polyketides	52717-49-4		BioDeepDB	2	pos	735166	296426	470167	1.08392e+06	647426	407813	865106	180517	762426	818431	622893	603753	402586	138962	1.14093e+06	757802	591895	919751	607711	975744	296558	587156	456686	575486
M181T461	Dulcin	181.097	460.5	180.09	0.684715	C9H12N2O2	[M+H]+	Benzene and substituted derivatives	N-phenylureas	C19415		150-69-6	HMDB0032565	BioDeepDB	2	pos	348404	966144	1.53227e+06	156658	332515	80585.6	1.25145e+06	1.11319e+06	4.89976e+06	3.82287e+06	126071	2.07074e+06	8.54146e+06	1.1574e+07	1.75186e+06	6.56348e+06	1.10233e+06	9.17496e+06	1.44839e+07	1.24938e+07	1.31226e+07	1.938e+07	1.43912e+07	1.54704e+07
M168T463	Phosphoenolpyruvic acid	167.979	462.9	167.982	18.4547	C3H5O6P	[M]+	Organic phosphoric acids and derivatives	Phosphate esters	C00074	Cancer: overview; Membrane transport; Metabolism of other amino acids; Chemical structure transformation maps; Excretory system; Endocrine system; Carbohydrate metabolism; Biosynthesis of other secondary metabolites; Amino acid metabolism; Energy metabolism; Global and overview maps	138-08-9 / 73-89-2	HMDB0000263	BioDeepDB	2	pos	7.04866e+06	9.09041e+06	9.72826e+06	2.42194e+06	2.19748e+06	6.23257e+06	9.5939e+06	1.19384e+07	7.12406e+06	8.94789e+06	8.67437e+06	1.20645e+07	9.16743e+06	1.8669e+06	1.12701e+07	5.14281e+06	7.75769e+06	1.13656e+07	5.98911e+06	5.5621e+06	1.05949e+07	5.80337e+06	5.33607e+06	5.45088e+06
M219T691	Capsidiol	219.174	691.1	236.178	0.265966	C15H24O2	[M+H-H2O]+	Prenol lipids	Sesquiterpenoids	C09627	Metabolism of terpenoids and polyketides	37208-05-2	HMDB0002352	BioDeepDB	2	pos	9.37353e+06	4.26566e+06	1.19538e+07	6.24161e+06	8.47637e+06	7.5634e+06	5.76284e+06	4.80527e+06	6.00598e+06	6.65079e+06	1.02265e+07	4.35488e+06	7.5298e+06	1.41262e+07	4.62189e+06	6.33101e+06	5.40112e+06	7.7551e+06	1.22928e+07	6.79044e+06	9.28161e+06	7.32345e+06	4.47232e+06	3.0122e+06
M361T488	Nitrendipine	361.139	488	360.132	0.0019133	C18H20N2O6	[M+H]+	Pyridines and derivatives	Hydropyridines	C07713		39562-70-4 / 84845-75-0	HMDB0015187	BioDeepDB	2	pos	878578	3.59447e+06	4.67256e+06	1.81627e+06	5.93801e+06	5.57224e+06	1.58411e+06	8.19368e+06	1.15911e+07	6.74476e+06	6.6664e+06	4.57136e+06	1.98524e+07	6.59187e+06	5.67389e+06	7.23182e+06	3.6832e+06	6.32846e+06	9.87326e+06	9.49894e+06	1.11155e+07	2.64815e+06	6.38901e+06	8.56528e+06
M194T492	Sequoyitol	194.081	492.3	194.079	2.16867	C7H14O6	[M]+	Alcohols and polyols	Cyclic alcohols and derivatives	C03365		523-92-2	HMDB0031449	BioDeepDB	2	pos	5.24838e+06	7.24493e+06	6.73629e+06	4.46696e+06	7.3399e+06	4.84961e+06	5.75145e+06	6.5111e+06	4.40149e+06	8.14375e+06	6.63497e+06	3.74151e+06	4.20693e+06	5.98632e+06	2.48842e+06	7.56088e+06	5.96604e+06	5.4658e+06	6.96684e+06	6.73498e+06	7.18894e+06	5.55638e+06	5.69328e+06	5.5981e+06
M204T511	N5-(L-1-Carboxyethyl)-L-ornithine	204.123	511.4	204.111	0.882223	C8H16N2O4	[M]+			C04210				BioDeepDB	2	pos	4.59332e+06	8.07888e+06	1.49038e+07	6.27765e+06	7.14117e+06	5.62811e+06	6.4944e+06	8.00216e+06	5.65515e+06	2.22749e+06	3.98331e+06	8.0062e+06	7.81387e+06	5.23126e+06	7.28533e+06	5.07107e+06	4.56131e+06	8.92446e+06	9.70865e+06	9.69233e+06	6.83034e+06	6.87621e+06	4.45394e+06	8.74139e+06
M172T517	Gabapentin	172.133	516.5	171.126	0.0140414	C9H17NO2	[M+H]+			C07018		60142-96-3		BioDeepDB	2	pos	1.12542e+08	1.35139e+08	4.59075e+07	3.37826e+07	1.30338e+07	2.88177e+07	8.72104e+06	1.54614e+07	4.12045e+07	2.76983e+08	2.9496e+08	1.17755e+07	9.02999e+06	7.53663e+06	1.3733e+07	1.28464e+07	1.78371e+08	5.85476e+06	1.72252e+07	1.48972e+07	7.52322e+07	3.90418e+07	1.64042e+08	3.22221e+06
M336T517	Isopentenyl adenosine	336.167	517.4	335.159	0.0713932	C15H21N5O4	[M+H]+			C16427	Global and overview maps; Metabolism of terpenoids and polyketides	7724-76-7		BioDeepDB	2	pos	9.28823e+06	8.39221e+06	6.45986e+06	8.12566e+06	1.23025e+06	3.34747e+06	2.4719e+06	1.32765e+07	1.50773e+07	9.0019e+06	1.12903e+07	1.35983e+07	1.45311e+07	1.36641e+07	2.98972e+06	7.71402e+06	7.24113e+06	1.14692e+07	1.68465e+06	8.90234e+06	6.61437e+06	1.55439e+07	2.57711e+06	1.3842e+07
M182T565	1-Methyluric acid	182.048	565.1	182.044	19.775	C6H6N4O3	[M]+	Imidazopyrimidines	Purines and purine derivatives	C16359	Biosynthesis of other secondary metabolites	708-79-2	HMDB0003099	BioDeepDB	2	pos	1.84846e+06	1.12894e+06	2.14186e+06	3.08388e+06	1.41472e+06	622010	1.6888e+06	1.52049e+06	1.95326e+06	2.25165e+06	2.03803e+06	2.06518e+06	2.24199e+06	1.39436e+06	4.0373e+06	1.49269e+06	2.12644e+06	1.0711e+06	1.66025e+06	2.98777e+06	2.06704e+06	2.98647e+06	1.3956e+06	1.22866e+06
M317T626	12-Keto-leukotriene B4	317.211	626.3	334.214	1.18246	C20H30O4	[M+H-H2O]+	Fatty Acyls	Eicosanoids	C05949	Lipid metabolism	136696-10-1	HMDB0004234	BioDeepDB	2	pos	1.60556e+07	1.06759e+07	9.53521e+06	1.14643e+07	9.37162e+06	9.62388e+06	1.26946e+07	1.17033e+07	1.26216e+07	7.21295e+06	1.20829e+07	1.1308e+07	8.80229e+06	8.95272e+06	1.02387e+07	7.85441e+06	9.73652e+06	1.10699e+07	1.09269e+07	7.11063e+06	9.49683e+06	8.40563e+06	1.49725e+07	6.77768e+06
M353T626_2	Prostaglandin I2	353.232	626.3	352.225	1.27433	C20H32O5	[M+H]+			C01312	Circulatory system; Signal transduction; Lipid metabolism; Signaling molecules and interaction; Immune system; Global and overview maps	35121-78-9		BioDeepDB	2	pos	1.67769e+08	1.19984e+08	1.78477e+08	7.94449e+07	1.02017e+08	2.72802e+07	2.06118e+08	2.1593e+08	1.49185e+08	1.38637e+08	1.02855e+08	1.6511e+08	1.29353e+08	9.75217e+07	9.53737e+07	1.46879e+08	1.12921e+08	2.0248e+08	3.28966e+07	1.64321e+08	8.55256e+07	1.34704e+08	7.81503e+07	1.68769e+08
M337T641_2	Prostaglandin E1	337.237	641.2	354.241	0.677063	C20H34O5	[M+H-H2O]+	Fatty Acyls	Eicosanoids	C04741		745-65-3	HMDB0001442	BioDeepDB	2	pos	1.72403e+06	2.16284e+06	1.104e+06	2.14483e+06	1.1569e+06	1.25663e+06	1.38053e+06	1.24642e+06	1.46379e+06	1.39213e+06	1.11116e+06	1.80587e+06	1.92552e+06	1.58222e+06	2.92223e+06	1.42253e+06	2.85793e+06	1.74968e+06	2.49132e+06	2.17621e+06	1.46721e+06	1.38142e+06	1.40965e+06	1.39417e+06
M348T698	Enalaprilat	348.162	697.8	348.168	18.3822	C18H24N2O5	[M]+	Carboxylic acids and derivatives	Amino acids, peptides, and analogues	C11720		76420-72-9	HMDB0041886	BioDeepDB	2	pos	2.83514e+06	2.80428e+06	2.12812e+06	1.50759e+06	1.46448e+06	531145	2.50996e+06	2.65517e+06	3.96906e+06	3.62712e+06	2.76022e+06	1.56314e+06	2.28957e+06	1.6599e+06	3.84532e+06	2.74274e+06	3.71757e+06	3.21789e+06	1.70641e+06	2.78409e+06	3.00124e+06	3.42613e+06	2.0968e+06	1.98081e+06
M195T698	Neocnidilide	195.138	698.4	194.131	0.00202257	C12H18O2	[M+H]+	Lactones	Gamma butyrolactones	C17002		4567-33-3	HMDB0034450	BioDeepDB	2	pos	4.4846e+06	2.82472e+06	1.47399e+06	4.64543e+06	936224	625208	3.35794e+06	4.14055e+06	4.54982e+06	3.24499e+06	4.87331e+06	4.70787e+06	3.81035e+06	4.23561e+06	8.71363e+06	3.2812e+06	5.40885e+06	3.17934e+06	1.55313e+06	5.72932e+06	4.78783e+06	4.84315e+06	2.96964e+06	6.12875e+06
M301T698	9-cis-Retinoic acid	301.216	698.4	300.209	0.762777	C20H28O2	[M+H]+	Prenol lipids	Retinoids	C15493	Cancer: overview; Metabolism of cofactors and vitamins; Endocrine system; Cancer: specific types; Immune system	5300-03-8	HMDB0002369	BioDeepDB	2	pos	2.31869e+06	4.41533e+06	5.85481e+06	2.68747e+06	1.00424e+07	1.38123e+07	4.03434e+06	3.60669e+06	3.59921e+06	3.57983e+06	4.77432e+06	4.49919e+06	4.5808e+06	3.14279e+06	4.00414e+06	4.83689e+06	4.80404e+06	3.31202e+06	8.33882e+06	2.85881e+06	4.73892e+06	2.60078e+06	5.78741e+06	3.46403e+06
M584T758_2	Avermectin A1b aglycone	584.334	757.7	584.335	0.751055	C34H48O8	[M]+			C11964	Global and overview maps; Metabolism of terpenoids and polyketides			BioDeepDB	2	pos	2.24446e+07	3.28291e+07	2.43189e+07	2.6561e+07	3.32463e+07	3.10837e+07	3.33069e+07	3.3088e+07	4.14906e+07	4.46324e+07	3.96596e+07	4.23056e+07	3.52462e+07	2.32309e+07	3.89419e+07	2.20803e+07	2.77532e+07	2.75974e+07	2.73496e+07	3.82619e+07	3.00976e+07	3.00854e+07	4.54417e+07	3.09816e+07
M179T794	Methyleugenol	179.107	794.1	178.099	0.0135353	C11H14O2	[M+H]+	Benzene and substituted derivatives	Methoxybenzenes	C10454	Biosynthesis of other secondary metabolites	93-15-2	HMDB0031864	BioDeepDB	2	pos	3.16235e+07	1.89488e+07	4.73638e+07	4.52035e+07	2.17243e+07	3.97458e+07	3.49329e+07	2.22329e+07	2.91524e+07	3.45294e+07	1.93518e+07	3.8666e+07	2.36918e+07	3.78566e+07	3.00839e+07	4.56381e+07	4.88105e+07	5.02533e+07	5.51475e+07	4.45043e+07	2.77971e+07	1.60206e+07	1.83185e+07	2.38871e+07
M167T823	3-(2-Hydroxyphenyl)propanoic acid	167.07	823.2	166.063	0.618175	C9H10O3	[M+H]+	Phenylpropanoic acids		C01198	Amino acid metabolism; Xenobiotics biodegradation and metabolism; Global and overview maps	495-78-3	HMDB0033752	BioDeepDB	2	pos	3.56928e+07	1.20124e+08	4.41979e+07	1.12742e+08	3.84342e+07	3.20305e+07	4.21262e+07	2.1716e+07	1.15507e+08	1.13323e+08	4.51116e+07	5.02149e+07	4.5931e+07	7.73064e+07	1.3859e+08	1.01993e+08	3.48452e+07	8.33453e+07	3.09334e+07	3.33644e+07	5.41145e+07	4.12867e+07	1.37598e+08	1.7866e+08
M195T823	3-Methyl-L-tyrosine	195.102	823.2	195.089	0.103119	C10H13NO3	[M]+			C20800				BioDeepDB	2	pos	2.24528e+08	2.48769e+08	2.04976e+08	3.78787e+08	5.71215e+07	5.36882e+07	1.28985e+08	1.18923e+08	3.65493e+08	3.27687e+08	2.03468e+08	3.03076e+08	1.23882e+08	2.98122e+08	5.02503e+08	2.85007e+08	2.68889e+08	2.54298e+08	3.27174e+08	3.92816e+08	2.39995e+08	2.41404e+08	2.329e+08	2.82129e+08
M123T91	Sulfoacetaldehyde	122.976	90.6	123.983	0.618008	C2H4O4S	[M-H]-	Organic oxides	Carbonyl compounds	C00593	Energy metabolism; Metabolism of other amino acids; Global and overview maps	32797-12-9		MetaDNA	2	neg	1.87018e+06	1.31111e+06	2.10678e+06	1.90489e+06	3.03446e+06	1.59958e+06	2.19511e+06	1.7616e+06	3.02952e+06	5.52993e+06	3.62254e+06	2.33507e+06	2.49224e+06	2.26598e+06	2.51378e+06	2.00937e+06	516722	2.41633e+06	1.89545e+06	2.09724e+06	2.68333e+06	2.84496e+06	3.54532e+06	4.51653e+06
M155T97	Uracil 5-carboxylate	155.01	96.7	156.017	0.490292	C5H4N2O4	[M-H]-	Azacyclic compounds	Carboxylic acids	C03030		23945-44-0		MetaDNA	2	neg	6.15604e+06	6.44625e+06	6.14584e+06	4.66723e+06	6.39185e+06	5.53819e+06	6.67194e+06	1.59596e+06	6.87709e+06	9.9539e+06	6.11569e+06	7.4853e+06	4.51766e+06	4.55876e+06	3.78679e+06	4.3075e+06	2.78292e+06	5.45155e+06	4.72846e+06	4.39514e+06	3.40424e+06	3.83351e+06	2.17168e+06	4.45472e+06
M363T76	Xanthylic acid	363.033	76.1	364.042	4.4734	C10H13N4O9P	[M-H]-	Azacyclic compounds	Alcohols and polyols	C00655	Chemical structure transformation maps; Global and overview maps; Nucleotide metabolism	523-98-8	HMDB0001554	MetaDNA	2	neg	5.05156e+06	3.79028e+06	1.98802e+06	3.158e+06	3.75704e+06	2.21179e+06	2.42011e+06	3.83997e+06	4.16666e+06	3.54485e+06	3.06572e+06	3.36079e+06	2.93397e+06	1.94801e+06	3.77028e+06	4.44562e+06	3.7041e+06	3.81834e+06	4.20194e+06	3.67166e+06	2.53713e+06	1.57769e+06	4.13678e+06	3.08604e+06
M101T108	Succinic acid semialdehyde	101.024	107.6	102.032	1.22743	C4H6O3	[M-H]-	Carboxylic acids and derivatives	Carbonyl compounds	C00232	Metabolism of cofactors and vitamins; Carbohydrate metabolism; Amino acid metabolism; Energy metabolism; Cellular community - prokaryotes; Global and overview maps	692-29-5	HMDB0001259	MetaDNA	2	neg	5.83459e+06	1.21276e+07	2.67381e+06	2.71944e+06	9.53341e+06	7.44727e+06	1.61202e+07	8.00392e+06	7.84076e+06	6.64133e+06	8.67838e+06	2.51115e+06	8.30047e+06	7.41984e+06	6.92904e+06	9.77479e+06	2.16322e+06	5.32638e+06	2.27171e+06	7.73347e+06	8.94396e+06	3.95849e+06	8.10375e+06	2.33663e+06
M163T396	4-Hydroxycinnamic acid	163.04	395.5	164.047	0.147203	C9H8O3	[M-H]-	Benzene and substituted derivatives	1-hydroxy-2-unsubstituted benzenoids	C00811	Metabolism of cofactors and vitamins; Biosynthesis of other secondary metabolites; Amino acid metabolism; Chemical structure transformation maps; Global and overview maps	7400-08-0/7400-08-0 501-98-4/501-98-4	HMDB0002035	MetaDNA	2	neg	1.89209e+06	2.37001e+06	1.86346e+06	3.31899e+06	1.32108e+06	910174	2.07001e+06	2.42452e+06	2.34966e+06	2.30249e+06	3.07067e+06	2.04372e+06	83301.5	133786	96445.9	98481.4	110334	99315.5	32009.1	156039	61449.1	227150	15649	42969.9
M135T165	L-Homocysteine	135.032	165.2	135.035	23.6975	C4H9NO2S	[M]-	Carboxylic acids and derivatives	Alkylthiols	C00155	Drug resistance: antineoplastic; Amino acid metabolism; Energy metabolism; Immune system; Global and overview maps	6027-13-0		MetaDNA	2	neg	3.79796e+07	3.04537e+07	3.29709e+07	3.59399e+07	2.70054e+07	2.25629e+07	4.00955e+07	2.57234e+07	4.03673e+07	3.0272e+07	2.85249e+07	3.56719e+07	1.18274e+07	1.93755e+07	3.78594e+07	1.31089e+07	4.21587e+07	3.77614e+07	4.03356e+07	1.63052e+07	1.41009e+07	1.94277e+07	1.61912e+07	1.75015e+07
M208T498	L-Arogenate	208.062	497.6	227.079	5.71948	C10H13NO5	[M-H2O-H]-	Carboxylic acids and derivatives	Alcohols and polyols	C00826	Amino acid metabolism; Global and overview maps	53078-86-7		MetaDNA	2	neg	1.3899e+06	1.12614e+06	1.10914e+06	1.39328e+06	1.2103e+06	849081	1.21046e+06	1.77211e+06	1.89774e+06	2.3692e+06	1.93857e+06	1.54778e+06	1.61628e+06	1.42433e+06	1.78567e+06	2.32437e+06	2.60232e+06	1.68734e+06	1.82341e+06	3.15052e+06	2.38686e+06	1.73577e+06	1.66158e+06	1.63121e+06
M221T336	N-Acetylmannosamine	221.093	336.2	221.09	14.0214	C8H15NO6	[M]-	Carboxylic acids and derivatives	Alcohols and polyols	C00645	Carbohydrate metabolism; Glycan biosynthesis and metabolism; Global and overview maps	7772-94-3/3615-17-6	HMDB0001129	MetaDNA	2	neg	193937	522147	647716	218329	1.07077e+06	406431	256283	240848	486842	208555	123508	123609	815961	770485	925564	413669	799968	150415	93160.3	83339.3	232232	69846.3	699874	331676
M251T293_2	Deoxyadenosine	251.104	293.4	251.102	7.16841	C10H13N5O3	[M]-	Azacyclic compounds	Alcohols and polyols	C00559	Membrane transport; Global and overview maps; Nucleotide metabolism	958-09-8	HMDB0000101	MetaDNA	2	neg	2241.87	8597.34	6978.72	8388.06	29576.2	3825.61	12348	12031.2	14611.2	11022.1	2227	13268.5	291123	353261	269209	573790	638980	475655	397557	600262	472583	365487	371208	326804
M370T73	Acetyl adenylate	370.054	72.6	389.074	2.99955	C12H16N5O8P	[M-H2O-H]-	Azacyclic compounds	Alcohols and polyols	C05993	Carbohydrate metabolism; Global and overview maps; Nucleotide metabolism	13015-87-7	HMDB0006880	MetaDNA	2	neg	566463	1.50516e+06	3.49904e+06	1.76291e+06	4.12007e+06	9.39486e+06	5.29323e+06	3.72671e+06	2.89011e+06	3.72525e+06	4.55415e+06	3.78283e+06	3.30531e+06	2.80202e+06	3.16486e+06	8.13977e+06	5.99668e+06	5.20355e+06	7.22621e+06	7.06287e+06	4.8942e+06	6.16168e+06	2.76377e+06	1.66711e+06
M516T98_2	Lipoyl-AMP	516.072	98.1	535.096	10.6767	C18H26N5O8PS2	[M-H2O-H]-	Azacyclic compounds	1,2-dithiolanes	C16238	Metabolism of cofactors and vitamins; Global and overview maps		HMDB0059635	MetaDNA	2	neg	1.54894e+06	1.10464e+06	3.37955e+06	2.10553e+06	1.27603e+06	1.11569e+06	1.85057e+06	2.34239e+06	2.69497e+06	3.33085e+06	2.29863e+06	2.0595e+06	1.97366e+06	1.85946e+06	1.99915e+06	1.33128e+06	1.7663e+06	1.29014e+06	1.8586e+06	1.67005e+06	2.2015e+06	2.90759e+06	2.62192e+06	2.4791e+06
M116T287	4-Methylaminobutyrate	116.071	286.7	117.079	7.9606	C5H11NO2	[M-H]-	Carboxylic acids and derivatives	Amines	C15987	Metabolism of cofactors and vitamins; Global and overview maps	1119-48-8		MetaDNA	2	neg	1.83737e+06	3.75316e+06	2.46069e+06	4.55778e+06	1.7564e+06	2.6586e+06	442019	4.66797e+06	2.2894e+06	2.70315e+06	2.31163e+06	2.04575e+06	4.201e+06	2.08246e+06	1.88132e+06	2.03431e+06	1.11023e+06	2.3076e+06	2.21235e+06	2.82508e+06	1.18136e+06	2.37687e+06	805707	1.82441e+06
M509T101	2-O-[2-O-(alpha-D-Mannopyranosyl)-alpha-D-glucopyranosyl]-3-phospho-D-glycerate	509.092	100.6	510.099	1.52428	C15H27O17P	[M-H]-			C19793				MetaDNA	2	neg	505445	946969	858439	2.2192e+06	1.63716e+06	351959	2.73641e+06	2.87347e+06	745672	1.14549e+06	845001	1.67946e+06	1.97085e+06	1.11578e+06	1.20526e+06	258394	1.09476e+06	2.25861e+06	736740	542050	772091	785739	1.1738e+06	1.4605e+06
M506T89_1	ATP	505.984	88.8	506.996	8.54565	C10H16N5O13P3	[M-H]-	Azacyclic compounds	Alcohols and polyols	C00002	Endocrine and metabolic disease; Membrane transport; Transport and catabolism; Signal transduction; Cell growth and death; Sensory system; Endocrine system; Environmental adaptation; Cardiovascular disease; Neurodegenerative disease; Biosynthesis of other secondary metabolites; Signaling molecules and interaction; Metabolism of terpenoids and polyketides; Nucleotide metabolism; Infectious disease…	56-65-5/987-65-5	HMDB0000538	MetaDNA	2	neg	1.75089e+07	1.22823e+07	1.44851e+07	1.47254e+07	1.37089e+07	1.62519e+07	1.4409e+07	1.49203e+07	2.17346e+07	1.7283e+07	2.01792e+07	1.49608e+07	1.62148e+07	1.47922e+07	1.4019e+07	1.70568e+07	1.44146e+07	1.45902e+07	1.42785e+07	1.23173e+07	1.72685e+07	1.50687e+07	9.50666e+06	1.03051e+07
M131T89	(-)-Isopiperitenone	131.083	89	150.105	26.0134	C10H14O	[M-H2O-H]-	Organic oxides	Carbonyl compounds	C02485	Global and overview maps; Metabolism of terpenoids and polyketides	80995-97-7		MetaDNA	2	neg	6.50987e+07	1.54266e+07	4.71254e+07	2.6974e+07	1.18381e+07	3.0475e+07	3.16935e+07	2.03511e+07	6.04422e+07	8.33379e+07	3.8408e+07	2.24976e+07	3.58985e+07	2.96393e+07	5.55013e+07	2.4671e+07	3.18924e+07	3.36462e+07	1.66362e+07	3.13208e+07	3.21969e+07	2.59726e+07	2.46223e+07	2.74235e+07
M311T767	9,12,13-TriHOME	311.222	767	330.241	0.289182	C18H34O5	[M-H2O-H]-	Carboxylic acids and derivatives	Alcohols and polyols	C14833	Lipid metabolism	97134-11-7	HMDB0004708	MetaDNA	2	neg	2.51793e+07	3.93738e+07	8.01672e+06	3.57297e+07	1.80631e+07	9.13467e+06	1.73388e+07	6.10342e+06	9.38816e+06	1.94552e+07	1.91775e+07	1.30176e+07	1.88309e+07	2.66838e+07	9.03683e+06	9.8327e+06	1.19164e+07	8.18624e+06	1.63739e+07	1.11731e+07	1.14829e+07	7.44876e+06	1.12848e+07	7.47142e+06
M333T756	15-Keto-prostaglandin F2a	333.206	756.3	352.225	0.930354	C20H32O5	[M-H2O-H]-	Carboxylic acids and derivatives	Acryloyl compounds	C05960	Lipid metabolism	35850-13-6	HMDB0004240	MetaDNA	2	neg	6.23518e+06	3.66158e+06	6.85128e+06	2.28235e+06	3.24756e+06	2.87851e+06	5.77454e+06	6.03662e+06	4.58297e+06	4.02771e+06	6.45036e+06	5.95233e+06	4.70647e+06	8.8581e+06	8.77335e+06	6.52478e+06	8.94717e+06	4.58725e+06	6.49191e+06	5.73279e+06	3.03836e+06	8.05117e+06	1.68165e+06	6.06362e+06
M312T767	9,10-12,13-Diepoxyoctadecanoate	312.226	767	312.23	14.0922	C18H32O4	[M]-	Carboxylic acids and derivatives	Carbonyl compounds	C14836	Lipid metabolism			MetaDNA	2	neg	1.15019e+07	9.95766e+06	7.08077e+06	4.23786e+07	1.31888e+07	8.7383e+06	7.05687e+06	9.66026e+06	9.21902e+06	3.41901e+06	8.53262e+06	2.56159e+06	3.52333e+06	3.62816e+06	4.33617e+06	1.13873e+07	9.68414e+06	1.03463e+07	6.47328e+06	2.8554e+06	9.06385e+06	7.2061e+06	9.21926e+06	1.1385e+07
M329T615	9,10-Dihydroxy-12,13-epoxyoctadecanoate	329.232	615.1	330.241	2.80652	C18H34O5	[M-H]-	Carboxylic acids and derivatives	Alcohols and polyols	C14837	Lipid metabolism			MetaDNA	2	neg	1.61387e+07	2.61366e+07	1.72288e+07	2.24049e+07	1.54651e+07	8.03336e+06	2.08019e+07	1.3619e+07	1.64328e+07	1.48264e+07	2.49029e+07	2.03318e+07	2.07598e+07	1.98373e+07	2.3675e+07	8.02362e+06	2.46501e+07	2.35994e+07	1.09178e+07	2.40301e+07	2.63851e+07	2.55641e+07	9.6697e+06	3.01173e+07
M135T836	Phenyl acetate	134.895	836.4	136.052	10.4134	C8H8O2	[M-H]-			C00548		122-79-2		BioDeepDB	2	neg	3.49216e+07	5.01416e+07	3.49653e+07	6.81004e+07	3.69998e+07	4.12685e+07	3.41526e+07	3.4694e+07	4.447e+07	5.21347e+07	5.89717e+07	2.44771e+07	2.53498e+07	5.10756e+07	1.64838e+07	5.12579e+07	4.97078e+07	5.41806e+07	4.65446e+07	7.4146e+07	5.76954e+07	5.50257e+07	6.6959e+07	4.79296e+07
M116T590	5-Aminopentanoate	116.073	589.8	117.079	7.547	C5H11NO2	[M-H]-	Carboxylic acids and derivatives	Amino acids, peptides, and analogues	C00431	Amino acid metabolism; Global and overview maps	660-88-8	HMDB0003355	mzCloud	2	neg	2.84263e+06	2.1911e+06	2.09808e+06	2.84018e+06	1.57557e+06	766765	2.10689e+06	2.24461e+06	2.45006e+06	2.32492e+06	2.46916e+06	1.51341e+06	2.53422e+06	2.49029e+06	3.28911e+06	2.55098e+06	2.37061e+06	2.23223e+06	1.76926e+06	3.6464e+06	2.03896e+06	2.34136e+06	1.59777e+06	2.98484e+06
M173T536	4-Quinolinecarboxylic acid	173.118	536.3	173.048	7.49758	C10H7NO2	[M]-			C06414		486-74-8		BioDeepDB	2	neg	1.07361e+06	1.61306e+06	1.44796e+06	4.86813e+06	3.02371e+06	410917	1.31584e+06	2.4686e+06	1.14879e+07	6.44162e+06	1.76988e+06	4.04486e+06	3.06375e+06	8.0758e+06	7.56144e+06	1.12907e+06	2.20346e+06	1.17456e+06	3.38033e+06	2.20026e+06	1.92896e+06	5.67773e+06	8.45707e+06	1.24595e+07
M135T56	Phenylacetic acid	134.865	55.6	136.052	11.6876	C8H8O2	[M-H]-	Benzene and substituted derivatives		C07086	Amino acid metabolism; Xenobiotics biodegradation and metabolism; Global and overview maps	103-82-2	HMDB0000209	BioDeepDB	2	neg	8.16323e+06	3.70451e+06	1.2229e+07	4.21749e+06	1.31209e+07	1.198e+07	4.05867e+06	1.3108e+07	3.21868e+06	1.26839e+07	1.44554e+07	1.16282e+07	9.87056e+06	1.00125e+07	6.26997e+06	2.8274e+06	1.8973e+07	3.24939e+06	8.86196e+06	1.25269e+07	1.44506e+07	2.86613e+06	9.35472e+06	2.30979e+06
M124T53	1-Naphthylamine	123.902	52.5	143.073	9.49245	C10H9N	[M-H2O-H]-			C14790	Xenobiotics biodegradation and metabolism	134-32-7		BioDeepDB	2	neg	4.30261e+06	4.31374e+06	4.13326e+06	4.46379e+06	2.72718e+06	3.94438e+06	4.18322e+06	4.67009e+06	4.88037e+06	7.08452e+06	4.95176e+06	5.67163e+06	4.00398e+06	5.22169e+06	4.18383e+06	5.43209e+06	3.84319e+06	4.41208e+06	3.68418e+06	5.57976e+06	3.9644e+06	5.40313e+06	4.43204e+06	4.26887e+06
M191T81_2	Quinate	191.056	81.3	192.063	0.125618	C7H12O6	[M-H]-			C00296	Amino acid metabolism; Global and overview maps	77-95-2		BioDeepDB	2	neg	7.92155e+06	8.2794e+06	7.97414e+06	8.42027e+06	7.65962e+06	8.18097e+06	8.2182e+06	7.93338e+06	7.90672e+06	9.00818e+06	8.60789e+06	8.36182e+06	7.97116e+06	9.72472e+06	8.00601e+06	8.98088e+06	8.31009e+06	8.48203e+06	8.02592e+06	8.4179e+06	8.62922e+06	8.3429e+06	7.62416e+06	7.63083e+06
M175T179	Guanidinosuccinic acid	174.955	179.1	175.059	0.997187	C5H9N3O4	[M]-	Carboxylic acids and derivatives	Amino acids, peptides, and analogues	C03139		6133-30-8	HMDB0003157	BioDeepDB	2	neg	1.60116e+07	1.29494e+07	1.54783e+07	1.33684e+07	1.81984e+07	1.96211e+07	1.75362e+07	1.57721e+07	9.45388e+06	1.16881e+07	9.29385e+06	1.05573e+07	1.57655e+07	3.88305e+06	1.4973e+07	1.19872e+07	1.27097e+07	7.2792e+06	3.08018e+06	1.03501e+07	9.92414e+06	1.00516e+07	1.54266e+07	3.00411e+06
M239T103	Anserine	239.114	102.8	240.122	3.44605	C10H16N4O3	[M-H]-	Peptidomimetics	Hybrid peptides	C01262	Amino acid metabolism; Metabolism of other amino acids; Global and overview maps	584-85-0	HMDB0000194	BioDeepDB	2	neg	3.90531e+06	3.29596e+06	1.17719e+07	5.80607e+06	5.59389e+06	2.27934e+06	8.90183e+06	5.35047e+06	7.93513e+06	7.83936e+06	6.5532e+06	8.93309e+06	9.55243e+06	6.72593e+06	5.84449e+06	1.04228e+07	1.79423e+07	1.46202e+07	1.55563e+07	1.32735e+07	1.38365e+07	1.52245e+07	9.62203e+06	8.46795e+06
M124T108	Taurine	124.007	107.6	125.015	0.193537	C2H7NO3S	[M-H]-	Organic sulfonic acids and derivatives	Organosulfonic acids and derivatives	C00245	Membrane transport; Metabolism of other amino acids; Lipid metabolism; Signaling molecules and interaction; Energy metabolism; Global and overview maps	107-35-7	HMDB0000251	BioDeepDB	2	neg	4.56364e+07	4.68498e+07	8.55374e+07	3.68823e+07	3.23315e+07	1.60943e+07	4.63091e+07	1.02218e+07	4.29595e+07	5.31352e+07	2.38094e+07	2.05053e+07	2.73879e+07	1.20366e+07	1.91264e+08	4.02599e+07	1.48497e+07	1.70479e+07	2.52353e+07	3.32615e+07	2.57424e+07	4.09649e+07	1.05008e+08	8.11377e+07
M171T121_1	3-Dehydroshikimate	171.03	121.3	172.037	0.444366	C7H8O5	[M-H]-			C02637	Chemical structure transformation maps; Amino acid metabolism; Global and overview maps; Metabolism of terpenoids and polyketides	2922-42-1		BioDeepDB	2	neg	2.26749e+07	2.63801e+07	3.10445e+07	2.76489e+07	1.84967e+07	1.38318e+07	1.93863e+07	2.07699e+07	2.26812e+07	2.63703e+07	1.62936e+07	1.78158e+07	1.69523e+07	1.16445e+07	2.34889e+07	1.29464e+07	1.16531e+07	1.78987e+07	1.02305e+07	1.31911e+07	9.81847e+06	1.115e+07	8.78207e+06	9.02685e+06
M249T84	gamma-Glutamylcysteine	248.959	84	250.062	2.11475	C8H14N2O5S	[M-H]-	Carboxylic acids and derivatives	Amino acids, peptides, and analogues	C00669	Cell growth and death; Metabolism of other amino acids; Global and overview maps	636-58-8	HMDB0001049	BioDeepDB	2	neg	4.13807e+07	6.41488e+07	1.89551e+07	6.05852e+07	4.15261e+07	4.88033e+07	1.74878e+07	3.86684e+07	3.91083e+07	4.25597e+07	1.54497e+07	8.70134e+06	3.79767e+07	1.15227e+07	3.54388e+07	4.93082e+07	2.84346e+07	5.11889e+07	3.23139e+07	3.84598e+07	3.4242e+07	3.57666e+07	2.60579e+07	5.85819e+06
M188T257	Azelaic acid	188.098	257.5	188.105	9.5978	C9H16O4	[M]-	Fatty Acyls	Fatty acids and conjugates	C08261		123-99-9	HMDB0000784	BioDeepDB	2	neg	1.3429e+06	1.75667e+06	1.2687e+06	1.28995e+06	1.34055e+06	1.22468e+06	2.05408e+06	943690	596204	712116	1.80099e+06	783234	1.04688e+06	2.30789e+06	742612	1.29582e+06	1.23648e+06	1.98458e+06	962766	945961	1.23401e+06	1.05468e+06	473796	1.22548e+06
M173T70	Citric acid	173.009	70.1	192.027	3.98822	C6H8O7	[M-H2O-H]-	Carboxylic acids and derivatives	Tricarboxylic acids and derivatives	C00158	Cancer: overview; Chemical structure transformation maps; Signal transduction; Sensory system; Endocrine system; Carbohydrate metabolism; Biosynthesis of other secondary metabolites; Metabolism of terpenoids and polyketides; Amino acid metabolism; Energy metabolism; Global and overview maps	77-92-9 / 126-44-3	HMDB0000094	BioDeepDB	2	neg	7.25608e+06	8.09074e+06	4.55347e+06	9.56525e+06	6.12793e+06	7.42643e+06	8.06696e+06	7.80691e+06	9.0471e+06	1.07644e+07	1.14584e+07	7.72176e+06	7.03125e+06	6.75412e+06	4.75887e+06	6.67613e+06	8.99539e+06	8.16064e+06	9.64322e+06	7.08115e+06	8.102e+06	9.58448e+06	9.30019e+06	7.30257e+06
M371T810	Deoxycorticosterone acetate	371.065	809.5	372.23	3.11788	C23H32O4	[M-H]-			C14554		56-47-3		BioDeepDB	2	neg	2.76581e+07	2.89381e+07	2.11018e+07	1.7561e+07	1.99729e+07	8.94776e+06	1.51462e+07	2.02083e+07	3.20632e+06	4.01876e+06	1.25836e+06	4.6692e+06	5.18626e+06	4.73095e+06	8.9912e+06	7.50355e+06	4.59711e+06	4.56937e+06	7.34889e+06	3.76424e+06	1.07959e+06	2.22059e+06	1.28474e+06	5.32784e+06
M243T167	Uridine	243.061	166.7	244.07	1.79142	C9H12N2O6	[M-H]-	Pyrimidine nucleosides		C00299	Membrane transport; Global and overview maps; Nucleotide metabolism	58-96-8	HMDB0000296	BioDeepDB	2	neg	8.21658e+07	6.14946e+07	6.11791e+07	1.19432e+08	5.68574e+07	4.1742e+07	9.50343e+07	6.08592e+07	4.01601e+07	8.14875e+07	3.43784e+07	4.80433e+07	1.12241e+08	1.13641e+08	5.67315e+07	1.14397e+08	9.57345e+07	6.72755e+07	6.74872e+07	6.72825e+07	5.21393e+07	2.56737e+08	4.32904e+07	3.85125e+07
M303T838_2	Arachidonic acid	303.239	837.9	304.24	19.1268	C20H32O2	[M-H]-	Fatty Acyls	Fatty acids and conjugates	C00219	Circulatory system; Cell growth and death; Nervous system; Sensory system; Endocrine system; Lipid metabolism; Structure-based classification; Immune system; Infectious disease: parasitic; Global and overview maps	506-32-1	HMDB0001043	BioDeepDB	2	neg	3.53702e+07	2.57762e+07	5.44885e+07	4.16641e+07	1.30753e+07	1.97984e+07	3.30566e+07	2.8549e+07	4.06193e+07	5.92987e+07	3.0781e+07	8.9647e+07	3.72154e+07	9.31019e+07	3.213e+07	1.37063e+08	1.12682e+08	1.8333e+08	2.03397e+08	3.49887e+08	2.84812e+08	3.05459e+08	4.06402e+07	5.56603e+07
M105T82	Glyceric acid	105.019	81.7	106.027	0.228529	C3H6O4	[M-H]-	Organooxygen compounds	Carbohydrates and carbohydrate conjugates	C00258	Carbohydrate metabolism; Lipid metabolism; Amino acid metabolism; Energy metabolism; Global and overview maps	473-81-4	HMDB0000139	BioDeepDB	2	neg	5.66096e+07	1.19805e+07	2.82148e+07	2.69485e+07	1.22551e+07	8.07828e+07	1.13454e+08	8.88706e+07	2.00605e+07	8.79965e+07	4.57508e+07	4.17798e+07	2.45434e+07	2.34501e+07	5.37809e+07	5.33218e+07	6.24182e+07	3.1849e+07	6.18092e+07	1.48775e+07	4.74422e+07	4.73638e+07	5.0513e+07	4.03105e+07
M117T122	Succinic acid	117.056	121.6	118.027	9.56919	C4H6O4	[M-H]-	Carboxylic acids and derivatives	Dicarboxylic acids and derivatives	C00042	Cancer: overview; Metabolism of cofactors and vitamins; Chemical structure transformation maps; Signal transduction; Nervous system; Endocrine system; Carbohydrate metabolism; Xenobiotics biodegradation and metabolism; Amino acid metabolism; Energy metabolism; Global and overview maps	110-15-6	HMDB0000254	BioDeepDB	2	neg	1.5909e+07	4.006e+06	1.14239e+07	9.64303e+06	1.11501e+07	913180	3.32575e+06	2.27122e+06	1.47867e+07	3.11379e+07	2.75772e+06	3.26057e+06	1.27493e+06	1.65594e+07	1.46189e+07	1.28324e+07	1.12173e+07	1.8114e+07	1.36303e+07	1.76141e+06	1.62315e+06	3.11912e+06	1.91082e+07	1.26843e+07
M145T126	Oxoglutaric acid	145.062	125.9	146.022	2.51139	C5H6O5	[M-H]-	Keto acids and derivatives	Gamma-keto acids and derivatives	C00026	Cancer: overview; Metabolism of other amino acids; Signal transduction; Nervous system; Endocrine system; Excretory system; Carbohydrate metabolism; Digestive system; Xenobiotics biodegradation and metabolism; Amino acid metabolism; Chemical structure transformation maps; Global and overview maps	328-50-7 / 64-15-3	HMDB0000208	BioDeepDB	2	neg	1.19788e+06	4.79908e+06	627348	5.42977e+06	1.90592e+06	3.58229e+06	562280	4.4209e+06	1.5515e+06	610433	1.41734e+06	555967	3.56541e+06	5.27585e+06	2.55105e+06	1.65089e+06	1.61473e+06	1.31193e+06	510701	1.80484e+07	450483	508394	3.66731e+06	1.16612e+06
M140T80	O-Phosphoethanolamine	140.012	80.1	141.019	0.171414	C2H8NO4P	[M-H]-	Organic phosphoric acids and derivatives	Phosphate esters	C00346	Lipid metabolism; Signal transduction; Global and overview maps; Drug resistance: antimicrobial	1071-23-4	HMDB0000224	BioDeepDB	2	neg	2.6631e+07	3.31444e+07	2.42059e+07	3.31598e+07	2.30535e+07	3.49831e+07	2.88353e+07	3.57805e+07	1.58114e+07	2.53417e+07	1.87225e+07	8.15502e+06	3.05429e+07	3.466e+07	2.28687e+07	1.40197e+07	1.11365e+07	2.34175e+07	3.055e+07	2.75407e+07	1.78931e+07	9.89697e+06	2.67387e+07	2.6469e+07
M133T80	L-Aspartic acid	133.034	80.3	133.037	7.90184	C4H7NO4	[M]-	Carboxylic acids and derivatives	Amino acids, peptides, and analogues	C00049	Metabolism of cofactors and vitamins; Metabolism of other amino acids; Chemical structure transformation maps; Membrane transport; Signal transduction; Biosynthesis of other secondary metabolites; Signaling molecules and interaction; Translation; Amino acid metabolism; Energy metabolism; Cell motility; Global and overview maps	56-84-8	HMDB0000191	BioDeepDB	2	neg	2.3298e+07	2.66467e+07	3.31671e+07	2.21338e+07	2.14422e+07	2.63443e+07	2.84331e+07	2.53795e+07	3.11339e+07	4.04734e+07	3.5977e+07	4.41826e+07	1.66739e+07	2.9448e+07	1.70464e+07	3.2585e+07	2.89614e+07	2.98091e+07	1.91362e+07	2.99566e+07	3.85321e+07	3.88886e+07	4.57996e+07	8.04913e+07
M102T80	Dimethylglycine	102.056	80.5	103.063	0.235165	C4H9NO2	[M-H]-	Carboxylic acids and derivatives	Amino acids, peptides, and analogues	C01026	Amino acid metabolism; Global and overview maps	1118-68-9	HMDB0000092	BioDeepDB	2	neg	2.85254e+07	3.30253e+07	3.00157e+07	3.15904e+07	2.98823e+07	3.16531e+07	3.67143e+07	3.6117e+07	2.88258e+07	3.34221e+07	3.00132e+07	2.94908e+07	3.37341e+07	3.47516e+07	2.89602e+07	3.25653e+07	3.0213e+07	2.97661e+07	2.95859e+07	3.02527e+07	3.22576e+07	3.51658e+07	2.97494e+07	2.89205e+07
M128T90	Pyroglutamic acid	128.035	90.2	129.043	2.48336	C5H7NO3	[M-H]-	Carboxylic acids and derivatives	Amino acids, peptides, and analogues	C01879	Metabolism of other amino acids; Global and overview maps	98-79-3	HMDB0000267	BioDeepDB	2	neg	6.0518e+08	6.40997e+08	5.36022e+08	6.44173e+08	6.01552e+08	4.94634e+08	6.93413e+08	5.45444e+08	6.03536e+08	7.44676e+08	6.85585e+08	5.32798e+08	2.81414e+08	2.02466e+08	2.87851e+08	2.4054e+08	2.04721e+08	2.19852e+08	3.31498e+08	3.18344e+08	2.24223e+08	2.55185e+08	1.93241e+08	2.87818e+08
M147T285	N-Methyl-D-aspartic acid	147.045	285.5	147.053	20.8349	C5H9NO4	[M]-	Carboxylic acids and derivatives	Amino acids, peptides, and analogues	C12269		6384-92-5	HMDB0002393	BioDeepDB	2	neg	8.38972e+06	8.81173e+06	5.62157e+06	8.33772e+06	5.98208e+06	8.57533e+06	7.88501e+06	7.51941e+06	7.64541e+06	1.48287e+07	1.35539e+07	8.68122e+06	7.77373e+06	1.48955e+07	9.73316e+06	1.22726e+07	7.80431e+06	6.67217e+06	6.67809e+06	8.86762e+06	7.99805e+06	9.05475e+06	2.4686e+06	6.02296e+06
M195T82	Gluconic acid	195.051	81.5	196.058	0.635731	C6H12O7	[M-H]-	Organooxygen compounds	Carbohydrates and carbohydrate conjugates	C00257	Carbohydrate metabolism; Global and overview maps	526-95-4	HMDB0000625	BioDeepDB	2	neg	9.71423e+07	9.58299e+07	1.47135e+08	9.52817e+07	9.48157e+07	1.0794e+08	3.62923e+07	1.3005e+08	3.02627e+07	5.98286e+07	6.98061e+07	1.07923e+08	4.1876e+07	1.37646e+08	1.21441e+08	3.96229e+07	3.22602e+07	1.2691e+08	3.65869e+07	3.5337e+07	6.81053e+07	1.01784e+08	9.2016e+07	1.51003e+08
M206T384	N-Acetyl-L-phenylalanine	206.082	384	207.089	1.08695	C11H13NO3	[M-H]-	Carboxylic acids and derivatives	Amino acids, peptides, and analogues	C03519	Amino acid metabolism; Global and overview maps	2018-61-3	HMDB0000512	BioDeepDB	2	neg	2.58452e+06	7.27786e+06	1.21739e+06	1.17625e+06	294284	116269	229668	610602	436520	4.94766e+06	5.85884e+06	566201	317490	111390	1.71563e+06	55341	2.51898e+06	40477.2	435354	892261	906349	1.01571e+06	905368	1114.82
M116T91	Fumaric acid	116.035	90.6	116.011	29.4009	C4H4O4	[M]-	Carboxylic acids and derivatives	Dicarboxylic acids and derivatives	C00122	Cancer: overview; Metabolism of cofactors and vitamins; Chemical structure transformation maps; Signal transduction; Endocrine system; Carbohydrate metabolism; Xenobiotics biodegradation and metabolism; Amino acid metabolism; Energy metabolism; Global and overview maps	110-17-8	HMDB0000134	BioDeepDB	2	neg	1.00383e+07	1.52516e+07	4.58499e+06	3.3231e+06	3.93312e+06	2.39459e+06	7.70926e+06	3.41189e+06	3.26403e+06	4.7895e+06	4.15519e+06	3.8824e+06	5.71941e+06	4.54342e+06	4.93742e+06	5.5074e+06	3.42117e+06	3.44243e+06	4.88316e+06	5.07869e+06	5.58817e+06	5.09636e+06	6.34887e+06	7.10602e+06
M267T790	Formononetin	267.196	790.2	268.074	17.6299	C16H12O4	[M-H]-	Isoflavonoids	O-methylated isoflavonoids	C00858	Chemical structure transformation maps; Biosynthesis of other secondary metabolites; Global and overview maps	485-72-3	HMDB0005808	BioDeepDB	2	neg	1.41511e+08	2.72634e+08	9.38943e+07	3.2244e+08	1.75685e+08	1.02973e+08	9.95501e+07	3.95726e+07	7.3786e+07	8.79377e+07	5.81898e+07	4.12686e+07	7.69535e+07	8.48894e+07	4.99047e+07	5.32333e+07	2.72034e+07	8.99634e+07	5.32086e+07	4.52088e+07	2.33469e+07	3.72352e+07	7.03398e+07	2.3512e+07
M192T373	Phenylacetylglycine	192.067	372.5	193.074	0.124957	C10H11NO3	[M-H]-	Carboxylic acids and derivatives	Amino acids, peptides, and analogues	C05598	Amino acid metabolism	500-98-1	HMDB0000821	BioDeepDB	2	neg	1.13868e+07	7.48033e+06	9.60756e+06	9.39961e+06	8.46149e+06	6.291e+06	7.40274e+06	6.93087e+06	1.07618e+07	1.13816e+07	9.73856e+06	1.01058e+07	8.78296e+06	9.98478e+06	1.30735e+07	7.52481e+06	9.92236e+06	8.51919e+06	1.10125e+07	7.34657e+06	7.59215e+06	9.57074e+06	6.67838e+06	8.80308e+06
M218T151	Pantothenic acid	218.104	151	219.111	0.806956	C9H17NO5	[M-H]-	Alcohols and polyols	Polyols	C00864	Metabolism of cofactors and vitamins; Metabolism of other amino acids; Global and overview maps; Digestive system	79-83-4 / 20938-62-9 / 137-08-6	HMDB0000210	BioDeepDB	2	neg	2.79091e+07	1.19968e+07	1.98461e+07	3.45686e+07	3.4099e+07	2.50711e+07	3.06745e+07	4.17601e+07	3.92676e+07	2.65612e+07	3.62836e+07	4.71229e+07	2.87758e+08	2.46004e+08	2.10212e+08	4.35918e+08	3.93058e+08	4.61863e+08	3.80413e+08	4.28966e+08	3.80954e+08	3.59679e+08	2.23797e+08	2.67142e+08
M114T117	Dihydrouracil	113.989	117	114.043	11.593	C4H6N2O2	[M]-	Diazines	Pyrimidines and pyrimidine derivatives	C00429	Metabolism of cofactors and vitamins; Metabolism of other amino acids; Global and overview maps; Nucleotide metabolism	504-07-4	HMDB0000076	BioDeepDB	2	neg	3.63217e+06	3.77792e+06	1.46735e+06	790285	1.24931e+06	1.40206e+06	2.78601e+06	3.50048e+06	1.45873e+06	3.07559e+06	2.82076e+06	506640	1.86304e+06	2.90787e+06	2.70263e+06	1.38903e+06	1.31119e+06	1.37434e+06	3.81016e+06	1.63266e+06	4.02469e+06	2.39822e+06	1.50053e+06	1.43329e+06
M145T87	L-Glutamine	145.062	87	146.069	1.21327	C5H10N2O3	[M-H]-	Carboxylic acids and derivatives	Amino acids, peptides, and analogues	C00064	Cancer: overview; Metabolism of cofactors and vitamins; Chemical structure transformation maps; Membrane transport; Nervous system; Excretory system; Digestive system; Carbohydrate metabolism; Nucleotide metabolism; Translation; Amino acid metabolism; Energy metabolism; Global and overview maps	56-85-9	HMDB0000641	BioDeepDB	2	neg	6.32279e+08	2.82197e+08	6.83146e+09	3.31205e+08	1.79029e+08	3.75987e+08	5.84157e+09	1.00346e+10	1.14703e+10	8.08015e+08	2.74836e+08	6.0848e+08	4.91999e+08	5.31016e+08	8.54373e+08	5.57094e+08	8.67976e+08	5.72998e+08	2.60486e+09	5.55594e+08	2.4645e+09	5.10074e+08	6.46855e+08	6.04168e+08
M353T620	Prostaglandin F2a	353.233	619.6	354.241	0.0238965	C20H34O5	[M-H]-	Fatty Acyls	Eicosanoids	C00639	Nervous system; Signal transduction; Digestive system; Endocrine system; Lipid metabolism; Signaling molecules and interaction; Global and overview maps	551-11-1	HMDB0001139	BioDeepDB	2	neg	1.72506e+07	8.59408e+06	1.05841e+07	1.2425e+07	7.79633e+06	8.01876e+06	1.36773e+07	4.39807e+06	4.74435e+06	7.86575e+06	4.83067e+06	1.55606e+07	1.94269e+07	4.8186e+06	9.65553e+06	4.03547e+06	4.10991e+06	8.60352e+06	1.20444e+07	1.06047e+07	1.16574e+07	1.26398e+07	5.94972e+06	3.24076e+06
M375T446_1	Riboflavin	375.129	446.3	376.138	6.22	C17H20N4O6	[M-H]-	Pteridines and derivatives	Alloxazines and isoalloxazines	C00255	Metabolism of cofactors and vitamins; Global and overview maps; Membrane transport; Digestive system	83-88-5	HMDB0000244	BioDeepDB	2	neg	1.71463e+06	1.68599e+06	1.49471e+06	1.94118e+06	1.66318e+06	1.61432e+06	1.82964e+06	1.91604e+06	2.77679e+06	1.30997e+06	1.70232e+06	2.60268e+06	1.34097e+06	1.94503e+06	1.33826e+06	1.25729e+06	1.4473e+06	1.58411e+06	1.6189e+06	1.13255e+06	1.78074e+06	2.11947e+06	1.02658e+06	997584
M130T95	Creatine	130.062	94.7	131.07	0.584335	C4H9N3O2	[M-H]-	Carboxylic acids and derivatives	Amino acids, peptides, and analogues	C00300	Amino acid metabolism; Global and overview maps	57-00-1	HMDB0000064	BioDeepDB	2	neg	7.35312e+08	6.84424e+08	2.80783e+08	6.93713e+08	8.40168e+08	5.14968e+08	5.85893e+08	5.53503e+08	1.08903e+09	6.4281e+08	8.93353e+08	9.88955e+08	8.49433e+08	8.18784e+08	7.14778e+08	8.70642e+08	6.76839e+08	7.86018e+08	6.01109e+08	6.34243e+08	7.4099e+08	6.39755e+08	6.76236e+08	7.01387e+08
M397T806	Daidzin	397.224	805.8	416.111	6.47381	C21H20O9	[M-H2O-H]-	Isoflavonoids	Isoflavonoid O-glycosides	C10216	Biosynthesis of other secondary metabolites	552-66-9	HMDB0033991	BioDeepDB	2	neg	1.4661e+06	1.14579e+06	848639	1.90527e+06	2.62478e+06	1.44451e+06	1.2124e+06	338658	2.14776e+06	1.37332e+07	7.17883e+06	1.874e+06	1.12744e+07	2.74601e+07	3.28505e+06	2.02308e+07	1.2861e+07	8.33881e+06	8.40179e+06	5.27065e+06	2.17561e+07	1.45848e+07	8.81763e+06	7.40477e+06
M157T753	Pelargonic acid	157.123	753.5	158.131	0.152746	C9H18O2	[M-H]-	Fatty Acyls	Fatty acids and conjugates	C01601		112-05-0	HMDB0000847	BioDeepDB	2	neg	3.11894e+06	6.1756e+06	4.75264e+06	1.19425e+07	3.65246e+06	6.81016e+06	6.75089e+06	5.75729e+06	113639	7.13783e+06	6.40732e+06	1.75291e+07	9.69196e+06	1.36104e+07	1.09406e+07	1.64441e+07	2.02289e+07	2.57651e+07	132315	3.50785e+07	1.10149e+07	1.09267e+07	1.60233e+07	6.98077e+06
M159T128	Oxoadipic acid	158.978	128.1	160.037	7.82026	C6H8O5	[M-H]-	Keto acids and derivatives	Medium-chain keto acids and derivatives	C00322	Energy metabolism; Amino acid metabolism; Global and overview maps	3184-35-8	HMDB0000225	BioDeepDB	2	neg	1.06685e+06	1.06198e+06	1.18815e+06	961835	883809	563921	1.18244e+06	958521	1.12193e+06	901512	1.05895e+06	929963	678122	418733	647609	540496	615915	782627	569277	871810	575391	599512	401397	301248
M179T90	D-Mannose	179.056	90.2	180.063	2.36798	C6H12O6	[M-H]-	Organooxygen compounds	Carbohydrates and carbohydrate conjugates	C00159	Membrane transport; Transport and catabolism; Carbohydrate metabolism; Immune system; Global and overview maps	3458-28-4 / 3458-28-4 31103-86-3 / 530-26-7	HMDB0000169	BioDeepDB	2	neg	6.08455e+07	6.57142e+07	5.65319e+07	3.51404e+07	7.55233e+07	6.55166e+07	7.53803e+07	3.41733e+07	5.40362e+07	7.05583e+07	7.57188e+07	4.47441e+07	8.67928e+07	6.48361e+07	4.73227e+07	4.2299e+07	5.42497e+07	2.75391e+07	5.32524e+07	3.89419e+07	5.11755e+07	3.93507e+07	6.83619e+07	5.85361e+07
M255T837	Palmitic acid	255.232	837	256.24	0.922681	C16H32O2	[M-H]-	Fatty Acyls	Fatty acids and conjugates	C00249	Lipid metabolism; Chemical structure transformation maps; Global and overview maps	57-10-3	HMDB0000220	BioDeepDB	2	neg	6.38301e+07	6.67556e+07	7.99399e+07	8.08503e+07	4.48973e+07	5.89511e+07	6.37842e+07	5.34421e+07	5.55676e+07	6.71094e+07	3.78176e+07	6.91987e+07	4.06113e+07	5.14166e+07	6.38874e+07	5.12333e+07	7.46207e+07	5.64727e+07	1.18e+08	1.44329e+08	2.07028e+07	7.25559e+07	6.59262e+07	4.62697e+07
M131T363	Glutaric acid	130.993	362.9	132.042	3.95661	C5H8O4	[M-H]-	Carboxylic acids and derivatives	Dicarboxylic acids and derivatives	C00489	Lipid metabolism; Amino acid metabolism; Global and overview maps	110-94-1	HMDB0000661	BioDeepDB	2	neg	1.19212e+07	1.00048e+07	9.59329e+06	1.02288e+07	9.2931e+06	1.12367e+07	1.27432e+07	8.92928e+06	7.94377e+06	1.40392e+07	1.43665e+07	9.77031e+06	1.17203e+07	1.1224e+07	8.94934e+06	1.16607e+07	9.14479e+06	1.07589e+07	8.58773e+06	9.4239e+06	8.98989e+06	9.00444e+06	8.61004e+06	8.62662e+06
M221T826	N-Acetyl-D-glucosamine	221.154	826.1	221.09	0.462628	C8H15NO6	[M]-	Organooxygen compounds	Carbohydrates and carbohydrate conjugates	C00140	Carbohydrate metabolism; Membrane transport; Global and overview maps	7512-17-6	HMDB0000215	BioDeepDB	2	neg	7.55691e+06	1.83853e+06	6.76065e+06	1.69074e+06	2.42314e+06	3.96131e+06	6.86948e+06	7.49947e+06	5.9003e+06	2.28878e+06	8.32813e+06	8.01013e+06	7.61314e+06	1.84502e+06	4.68869e+06	2.38134e+06	7.06479e+06	7.93591e+06	2.70885e+06	9.02547e+06	6.44503e+06	7.88146e+06	5.299e+06	764513
M103T93	Malonate	103.004	92.7	104.011	0.233001	C3H4O4	[M-H]-			C00383	Lipid metabolism; Metabolism of other amino acids; Global and overview maps; Nucleotide metabolism	141-82-2 / 156-80-9		BioDeepDB	2	neg	2.19518e+06	2.52416e+06	2.3414e+06	2.40015e+06	2.312e+06	516273	2.35585e+06	2.52485e+06	2.21857e+06	2.49448e+06	2.4416e+06	2.22351e+06	2.04626e+06	1.72825e+06	2.09563e+06	2.33212e+06	2.36424e+06	2.41339e+06	2.41133e+06	2.2084e+06	2.54443e+06	2.54443e+06	2.44781e+06	1.73246e+06
M225T93	Carnosine	225.099	93.3	226.107	0.990423	C9H14N4O3	[M-H]-	Peptidomimetics	Hybrid peptides	C00386	Amino acid metabolism; Metabolism of other amino acids; Global and overview maps	305-84-0	HMDB0000033	BioDeepDB	2	neg	5.65385e+07	7.4833e+07	6.22766e+07	9.05876e+07	4.68142e+07	3.96972e+07	6.96133e+07	9.87705e+07	3.68516e+07	6.75626e+07	8.97604e+07	4.65374e+07	3.60726e+07	6.19125e+07	6.38482e+07	6.4607e+07	6.3677e+07	2.74848e+07	6.15717e+07	6.22316e+07	6.02484e+07	6.19935e+07	5.91341e+07	5.63423e+07
M137T94	Urocanic acid	137.036	93.5	138.043	0.904875	C6H6N2O2	[M-H]-	Azoles	Imidazoles	C00785	Amino acid metabolism; Global and overview maps	104-98-3	HMDB0000301	BioDeepDB	2	neg	2.94803e+06	3.1569e+06	3.6917e+06	3.8514e+06	3.64184e+06	2.95009e+06	3.84028e+06	3.15525e+06	5.36469e+06	6.92925e+06	5.04927e+06	4.01403e+06	6.4375e+06	5.85953e+06	6.60081e+06	6.46183e+06	9.45211e+06	8.24182e+06	9.05429e+06	8.49095e+06	9.93269e+06	1.04215e+07	9.78259e+06	7.15985e+06
M188T352	Kynurenic acid	188.035	351.8	189.043	1.72308	C10H7NO3	[M-H]-	Quinolines and derivatives	Quinoline carboxylic acids	C01717	Amino acid metabolism; Global and overview maps	492-27-3	HMDB0000715	BioDeepDB	2	neg	1.15632e+06	994533	1.46992e+06	1.38551e+06	937202	1.07914e+06	1.14389e+06	1.43714e+06	32800.4	407816	4.10237e+06	78146.9	944450	120306	97985.1	1.16653e+06	203857	975982	98859.5	1.02189e+06	1.57122e+06	179918	170554	96712.6
M113T117	Creatinine	112.986	117	113.059	10.572	C4H7N3O	[M]-	Carboxylic acids and derivatives	Amino acids, peptides, and analogues	C00791	Amino acid metabolism; Global and overview maps	60-27-5	HMDB0000562	BioDeepDB	2	neg	1.09158e+08	1.15338e+08	1.12259e+08	1.04642e+08	9.55394e+07	1.02688e+08	1.02865e+08	9.62405e+07	9.09423e+07	1.05831e+08	1.08921e+08	8.50277e+07	1.13089e+08	1.30252e+08	1.17035e+08	1.32471e+08	1.09708e+08	1.04076e+08	1.00544e+08	8.88985e+07	7.23064e+07	1.15107e+08	6.39274e+07	6.92932e+07
M114T96	L-Proline	114.056	96.3	115.063	1.08719	C5H9NO2	[M-H]-	Carboxylic acids and derivatives	Amino acids, peptides, and analogues	C00148	Cancer: overview; Membrane transport; Digestive system; Biosynthesis of other secondary metabolites; Translation; Amino acid metabolism; Global and overview maps	147-85-3	HMDB0000162	BioDeepDB	2	neg	5.34606e+06	5.52136e+06	6.1253e+06	6.32065e+06	5.88998e+06	5.1052e+06	5.82861e+06	5.60479e+06	8.7876e+06	1.084e+07	8.96802e+06	6.34545e+06	9.66544e+06	1.15745e+07	8.99944e+06	8.89871e+06	1.42936e+07	1.19352e+07	1.60479e+07	1.38988e+07	1.59443e+07	1.5393e+07	1.40519e+07	9.97538e+06
M180T99	Caffeate	180.034	98.9	180.042	20.7556	C9H8O4	[M]-			C01197	Chemical structure transformation maps; Biosynthesis of other secondary metabolites; Global and overview maps	501-16-6 / 331-39-5		BioDeepDB	2	neg	6.40109e+07	1.73408e+07	7.47714e+07	3.03734e+07	2.06942e+08	6.49992e+07	1.34024e+08	6.71063e+07	9.7511e+07	8.02939e+07	8.64732e+07	8.74235e+07	7.56525e+07	8.0934e+07	3.95087e+07	1.12061e+08	1.2245e+08	1.23511e+08	6.51097e+07	1.06089e+08	9.73381e+07	9.54927e+07	1.58021e+08	5.95375e+07
M172T346	N-Acetylleucine	172.098	346.2	173.105	0.720521	C8H15NO3	[M-H]-	Carboxylic acids and derivatives	Amino acids, peptides, and analogues	C02710		1188-21-2	HMDB0011756	BioDeepDB	2	neg	1.56615e+06	2.06088e+06	2.6688e+06	2.89941e+06	1.79914e+06	839703	1.49276e+06	1.94428e+06	1.69983e+06	2.50985e+06	2.65171e+06	3.14407e+06	2.04911e+06	1.82069e+06	1.20484e+06	1.88048e+06	1.75558e+06	1.17039e+06	1.02673e+06	2.16817e+06	1.17904e+06	1.88054e+06	536091	1.04383e+06
M180T122_2	L-Tyrosine	180.067	121.9	181.074	0.133284	C9H11NO3	[M-H]-	Carboxylic acids and derivatives	Amino acids, peptides, and analogues	C00082	Cancer: overview; Metabolism of cofactors and vitamins; Metabolism of other amino acids; Chemical structure transformation maps; Nervous system; Endocrine system; Digestive system; Neurodegenerative disease; Biosynthesis of other secondary metabolites; Translation; Metabolism of terpenoids and polyketides; Amino acid metabolism; Substance dependence; Energy metabolism; Global and overview maps	60-18-4	HMDB0000158	BioDeepDB	2	neg	9.22086e+07	6.34252e+07	1.06662e+08	6.4225e+07	1.03132e+08	6.09513e+07	1.26514e+08	8.85632e+07	1.41148e+08	1.32673e+08	1.86844e+08	1.13798e+08	1.5285e+08	1.0335e+08	1.76939e+08	1.09999e+08	1.76586e+08	1.50895e+08	1.91791e+08	1.54412e+08	1.49919e+08	1.46017e+08	8.33653e+07	1.20867e+08
M665T105_2	Maltotetraose	665.219	104.7	666.222	6.72861	C24H42O21	[M-H]-	Organooxygen compounds	Carbohydrates and carbohydrate conjugates	C02052		34612-38-9	HMDB0001296	BioDeepDB	2	neg	1.23773e+06	1.72714e+06	1.91725e+06	1.52948e+06	1.31912e+06	1.80551e+06	1.38841e+06	1.44075e+06	1.88816e+06	1.65262e+06	1.9576e+06	1.49221e+06	1.79519e+06	1.52484e+06	1.39098e+06	1.59814e+06	1.46402e+06	1.04267e+06	1.36e+06	1.54489e+06	1.19453e+06	1.57452e+06	1.55023e+06	1.54942e+06
M203T363	L-Tryptophan	203.082	362.9	204.09	1.59541	C11H12N2O2	[M-H]-	Indoles and derivatives	Indolyl carboxylic acids and derivatives	C00078	Cancer: overview; Nervous system; Digestive system; Development and regeneration; Biosynthesis of other secondary metabolites; Translation; Amino acid metabolism; Chemical structure transformation maps; Infectious disease: parasitic; Global and overview maps	73-22-3	HMDB0000929	BioDeepDB	2	neg	1.16332e+08	1.75548e+08	2.17774e+08	1.93919e+08	2.0526e+08	1.2002e+08	8.25429e+07	1.94591e+08	1.71954e+08	1.58296e+08	3.2792e+07	1.33916e+08	1.07798e+08	1.92273e+08	1.35868e+08	1.76872e+08	8.08397e+07	1.32767e+08	1.3895e+08	1.5992e+07	9.45835e+07	1.29125e+08	1.40392e+08	1.52569e+08
M121T108	Erythritol	121.03	107.5	122.058	9.82483	C4H10O4	[M-H]-			C00503	Membrane transport	149-32-6		BioDeepDB	2	neg	989716	1.16458e+06	1.06772e+06	1.17899e+06	1.05088e+06	1.20185e+06	2.63872e+06	1.04482e+06	1.08644e+06	1.4132e+06	1.28049e+06	1.1431e+06	1.24091e+06	1.13966e+06	1.31132e+06	1.15912e+06	1.30111e+06	1.12169e+06	1.29873e+06	1.19484e+06	1.18034e+06	1.12748e+06	1.07196e+06	1.18897e+06
M116T696	L-Valine	116.071	696.5	117.079	4.36022	C5H11NO2	[M-H]-	Carboxylic acids and derivatives	Amino acids, peptides, and analogues	C00183	Cancer: overview; Metabolism of cofactors and vitamins; Metabolism of other amino acids; Membrane transport; Digestive system; Biosynthesis of other secondary metabolites; Translation; Amino acid metabolism; Chemical structure transformation maps; Global and overview maps	72-18-4	HMDB0000883	BioDeepDB	2	neg	4.93451e+06	3.89858e+06	3.11572e+06	3.93243e+06	4.85759e+06	2.95402e+06	4.85417e+06	3.40709e+06	4.03805e+06	4.67415e+06	5.57558e+06	5.1173e+06	1.99707e+06	1.72543e+06	2.31155e+06	1.33528e+06	2.2752e+06	2.66339e+06	1.98908e+06	2.07231e+06	2.00713e+06	2.10853e+06	779820	1.3729e+06
M383T304_2	S-Adenosylhomocysteine	383.113	304.2	384.122	1.57543	C14H20N6O5S	[M-H]-	5'-deoxyribonucleosides	5'-deoxy-5'-thionucleosides	C00021	Amino acid metabolism; Global and overview maps	979-92-0	HMDB0000939	BioDeepDB	2	neg	1.46164e+07	1.4941e+07	1.20333e+07	9.1785e+06	1.29804e+07	1.11456e+07	1.25375e+07	9.12491e+06	8.40041e+06	6.18998e+06	8.64536e+06	8.51594e+06	1.06561e+07	1.01755e+07	1.06673e+07	1.59365e+07	1.19847e+07	1.69017e+07	1.13182e+07	7.95219e+06	1.05435e+07	1.00483e+07	6.85952e+06	1.29457e+07
M346T120	dGMP	346.055	120.2	347.063	1.29136	C10H14N5O7P	[M-H]-	Purine nucleotides	Purine deoxyribonucleotides	C00362	Global and overview maps; Nucleotide metabolism	902-04-5	HMDB0001044	BioDeepDB	2	neg	2.72156e+08	2.47124e+08	2.55046e+08	2.72635e+08	2.45784e+08	1.7886e+08	2.90869e+08	2.83035e+08	1.86384e+08	2.42095e+08	2.67593e+08	1.69883e+08	1.32501e+08	1.17346e+08	7.87493e+07	1.39566e+08	9.43854e+07	1.61032e+08	8.99932e+07	1.62256e+08	3.01117e+07	1.51692e+08	1.04851e+08	2.60977e+07
M223T742	Thymidine	223.028	742.4	242.09	1.37927	C10H14N2O5	[M-H2O-H]-	Pyrimidine nucleosides	Pyrimidine 2'-deoxyribonucleosides	C00214	Global and overview maps; Nucleotide metabolism	50-89-5	HMDB0000273	BioDeepDB	2	neg	1.01143e+06	1.53974e+06	1.22726e+06	3.84963e+06	1.60277e+06	1.10747e+06	1.46269e+06	2.1265e+06	4.9424e+06	6.9094e+06	2.0201e+06	9.77654e+06	4.16794e+06	4.01311e+06	2.33917e+06	7.46592e+06	3.46347e+06	9.78617e+06	6.28767e+06	6.75175e+06	4.15456e+06	7.66088e+06	3.52427e+06	5.20811e+06
M130T125	Leucine	130.087	124.7	131.095	0.584223	C6H13NO2	[M-H]-	Carboxylic acids and derivatives	Amino acids, peptides, and analogues	C16439		328-39-2	HMDB0062203	BioDeepDB	2	neg	2.63209e+08	2.67561e+08	2.22641e+08	3.1328e+08	3.94095e+08	3.35476e+08	2.36723e+08	2.82624e+08	4.23315e+08	5.03851e+08	4.05527e+08	3.6693e+08	1.84956e+08	1.90288e+08	2.77702e+08	2.00337e+08	1.97407e+08	1.82967e+08	1.50178e+08	2.2004e+08	1.46807e+08	1.5662e+08	1.56468e+08	1.53774e+08
M131T216	L-Isoleucine	131.072	216.1	131.095	9.88732	C6H13NO2	[M]-	Carboxylic acids and derivatives	Amino acids, peptides, and analogues	C00407	Cancer: overview; Metabolism of other amino acids; Digestive system; Biosynthesis of other secondary metabolites; Infectious disease: bacterial; Translation; Amino acid metabolism; Chemical structure transformation maps; Global and overview maps	73-32-5	HMDB0000172	BioDeepDB	2	neg	904912	1.47522e+06	976783	923250	1.73468e+06	1.55914e+06	170383	1.58428e+06	2.81451e+06	1.56245e+06	2.75914e+06	1.15131e+06	765044	1.39559e+06	702961	1.07855e+06	717272	1.43159e+06	890932	982979	940238	1.43736e+06	1.05099e+06	1.67306e+06
M191T766	5-Hydroxyindoleacetic acid	191.108	765.6	191.058	5.77417	C10H9NO3	[M]-	Indoles and derivatives	Indolyl carboxylic acids and derivatives	C05635	Amino acid metabolism; Nervous system; Global and overview maps	54-16-0	HMDB0000763	BioDeepDB	2	neg	4.84501e+06	3.80563e+06	3.58455e+06	2.74004e+06	5.52797e+06	2.94341e+06	3.02842e+06	4.23661e+06	2.44203e+06	4.12733e+06	1.09696e+06	1.10869e+06	4.34261e+06	2.88505e+06	2.92366e+06	3.49297e+06	1.46958e+06	2.0117e+06	3.30647e+06	4.05746e+06	2.74774e+06	3.63081e+06	1.07996e+06	2.46678e+06
M164T285	D-Phenylalanine	164.072	285.5	165.079	1.0727	C9H11NO2	[M-H]-			C02265	Amino acid metabolism; Sensory system; Global and overview maps	673-06-3		BioDeepDB	2	neg	9.65124e+07	4.716e+07	3.91171e+08	1.29214e+08	2.08714e+08	1.59508e+08	1.59825e+08	1.54447e+08	1.77496e+08	8.5178e+08	2.61849e+08	7.01589e+08	3.6776e+08	2.93292e+08	2.48341e+08	2.85173e+08	1.37721e+08	2.39482e+08	1.94068e+08	2.96748e+08	1.59651e+08	2.22624e+08	6.20045e+08	3.91435e+08
M178T334	Hippuric acid	178.051	333.9	179.058	0.134793	C9H9NO3	[M-H]-	Benzene and substituted derivatives	Benzoic acids and derivatives	C01586	Amino acid metabolism; Global and overview maps	495-69-2	HMDB0000714	BioDeepDB	2	neg	3.37008e+06	1.55735e+06	3.18702e+06	2.80409e+06	3.39248e+06	1.09754e+06	423143	3.37599e+06	3.07842e+06	3.76059e+06	2.94864e+06	4.15765e+06	1.94873e+06	2.75873e+06	2.55547e+06	211349	2.09228e+06	2.11201e+06	1.3819e+06	2.94542e+06	3.17297e+06	3.30405e+06	4.62112e+06	3.78522e+06
M269T797	Dehydroepiandrosterone	269.212	796.6	288.209	1.88004	C19H28O2	[M-H2O-H]-	Steroids and steroid derivatives	Androstane steroids	C01227	Cancer: overview; Endocrine system; Lipid metabolism; Xenobiotics biodegradation and metabolism; Cancer: specific types; Global and overview maps	53-43-0	HMDB0000077	BioDeepDB	2	neg	1.50889e+07	3.70714e+07	4.83167e+07	6.59764e+07	2.20903e+07	3.09596e+07	2.67224e+07	6.93265e+07	2.93615e+07	5.85551e+07	4.10431e+07	8.03287e+07	9.69006e+07	3.43214e+07	2.14221e+07	7.7944e+07	3.7203e+07	3.78497e+07	7.91675e+07	1.2511e+08	8.47596e+07	8.94356e+07	6.49067e+07	1.44556e+08
M241T614	1-Hexadecanol	241.038	613.8	242.261	0.0901188	C16H34O	[M-H]-	Fatty Acyls	Fatty alcohols	C00823	Lipid metabolism	36653-82-4	HMDB0003424	BioDeepDB	2	neg	789468	1.15875e+06	1.12846e+06	623765	844183	892208	1.07973e+06	1.45083e+06	603853	836497	521787	958952	2.1886e+06	1.86771e+06	1.12035e+06	2.08977e+06	2.36964e+06	1.25238e+06	1.63594e+06	2.18207e+06	2.82227e+06	3.01318e+06	3.0614e+06	1.40589e+06
M271T823	17a-Estradiol	271.227	823.3	272.178	1.75116	C18H24O2	[M-H]-	Steroids and steroid derivatives	Estrane steroids	C02537	Lipid metabolism	57-91-0	HMDB0000429	BioDeepDB	2	neg	1.79225e+07	1.6487e+07	2.98991e+07	3.28772e+07	1.02786e+07	6.20794e+06	1.32695e+07	1.45274e+07	2.95267e+07	2.15116e+07	3.08211e+07	1.19578e+07	2.34023e+07	2.65371e+07	2.17453e+07	1.93909e+07	3.50358e+07	2.73318e+07	2.96491e+07	3.1973e+07	3.01012e+07	3.37103e+07	1.47104e+07	1.88484e+07
M121T494	Phenylethylamine	121.029	493.6	121.089	9.3494	C8H11N	[M]-	Benzene and substituted derivatives	Phenethylamines	C05332	Amino acid metabolism; Global and overview maps	64-04-0	HMDB0012275	BioDeepDB	2	neg	9.8499e+06	1.09125e+08	4.97002e+07	1.27441e+08	1.3748e+07	1.39718e+07	2.12735e+07	1.05341e+08	1.58922e+07	7.9757e+07	1.29793e+08	1.80574e+07	1.25228e+07	6.3295e+06	5.25355e+07	1.69945e+07	6.78894e+06	1.71777e+07	1.76405e+07	1.9519e+07	1.69633e+07	1.25512e+07	8.00995e+06	5.87472e+06
M407T701	Allocholic acid	407.28	701.5	408.288	1.41397	C24H40O5	[M-H]-	Steroids and steroid derivatives	Bile acids, alcohols and derivatives	C00695	Lipid metabolism; Global and overview maps; Digestive system	2464-18-8 / 81-25-4	HMDB0000505	BioDeepDB	2	neg	1.02596e+06	441905	624460	773601	506756	37919.9	643657	453333	972897	501011	413201	497239	266951	419561	372293	474922	475861	513656	659878	1.16899e+06	432583	471392	44249.3	36135.2
M283T803	Stearic acid	283.264	803.1	284.272	0.514036	C18H36O2	[M-H]-	Fatty Acyls	Fatty acids and conjugates	C01530	Lipid metabolism; Chemical structure transformation maps; Sensory system	57-11-4/646-29-7	HMDB0000827	MoNA	2	neg	1.30352e+08	1.16212e+08	1.62603e+08	6.75183e+06	1.29943e+08	9.3952e+07	1.60137e+08	8.54605e+07	8.14789e+07	3.97707e+06	1.15823e+07	2.55007e+07	7.26593e+07	6.2101e+06	6.76859e+07	1.07095e+08	1.02278e+07	1.46133e+08	6.50744e+07	1.50791e+07	1.12795e+07	1.91389e+07	3.20246e+07	5.89036e+07
M391T800	Chenodeoxycholic acid	391.285	800.5	392.293	0.987947	C24H40O4	[M-H]-	Steroids and steroid derivatives	Bile acids, alcohols and derivatives	C02528	Lipid metabolism; Global and overview maps; Digestive system	474-25-9	HMDB0000518	BioDeepDB	2	neg	4.00058e+06	2.80215e+06	6.94467e+06	2.01826e+06	5.66036e+06	3.38967e+06	5.54116e+06	6.9753e+06	2.83229e+06	805183	4.1685e+06	2.74804e+06	3.90298e+06	2.98735e+06	1.19035e+06	4.71368e+06	3.05825e+06	4.78797e+06	2.16707e+06	3.5952e+06	2.68595e+06	3.40935e+06	2.92413e+06	4.57085e+06
M335T739	12-Keto-tetrahydro-leukotriene B4	335.223	739.2	336.23	0.298309	C20H32O4	[M-H]-	Fatty Acyls	Eicosanoids	C02165	Nervous system; Sensory system; Digestive system; Endocrine system; Lipid metabolism; Signaling molecules and interaction; Structure-based classification; Global and overview maps	71160-24-2	HMDB0002995	BioDeepDB	2	neg	11332.7	45094.9	40940.8	54441.8	324161	24121.7	112165	104119	3.91018e+06	4.92997e+06	1.06135e+06	3.3927e+06	3.07162e+06	1.1165e+07	594721	3.74579e+06	4.11686e+06	6.22956e+06	1.10524e+07	1.28246e+07	2.43575e+07	1.44317e+07	5.1484e+06	6.4637e+06
M241T762	Pentadecanoic acid	241.217	762.1	242.225	2.17232	C15H30O2	[M-H]-	Fatty Acyls	Fatty acids and conjugates	C16537		1002-84-2	HMDB0000826	BioDeepDB	2	neg	1.9107e+07	5.43279e+07	1.69045e+07	9.83203e+07	1.90696e+07	2.80919e+07	2.06207e+07	1.07718e+07	2.02426e+07	2.41395e+07	1.28126e+07	1.88733e+07	7.63195e+06	2.98132e+07	1.66212e+07	1.0003e+07	7.16093e+06	1.15031e+07	7.92911e+06	8.39183e+06	9.05603e+06	1.35774e+07	1.31262e+07	3.08601e+07
M311T784_1	Arachidic acid	311.168	783.8	312.303	1.27261	C20H40O2	[M-H]-	Fatty Acyls	Fatty acids and conjugates	C06425	Lipid metabolism	506-30-9	HMDB0002212	BioDeepDB	2	neg	2.10805e+07	1.07074e+07	6.43401e+07	2.05444e+07	6.24818e+07	9.54407e+06	2.20865e+07	6.17335e+07	9.95439e+07	1.23454e+08	3.68462e+07	1.25168e+08	9.50814e+07	1.71287e+08	6.91172e+07	8.41229e+07	1.0504e+08	8.97748e+07	3.31005e+07	8.53488e+07	1.04405e+08	1.70386e+08	1.48138e+08	1.16552e+08
M271T809	Epiandrosterone	271.227	809.1	290.225	0.998787	C19H30O2	[M-H2O-H]-	Steroids and steroid derivatives	Androstane steroids	C07635	Xenobiotics biodegradation and metabolism; Global and overview maps	481-29-8	HMDB0000365	BioDeepDB	2	neg	1.43195e+06	1.12799e+06	989064	1.07781e+06	895552	1.10463e+06	982048	1.46902e+06	2.62924e+06	2.08228e+06	3.14392e+06	1.91181e+06	1.77572e+06	2.51056e+06	3.4481e+06	2.49283e+06	1.65345e+06	1.88572e+06	1.62489e+06	2.31135e+06	3.29578e+06	1.18377e+06	1.69109e+06	1.77897e+06
M338T824	Erucic acid	338.208	824.4	338.318	1.84306	C22H42O2	[M]-	Fatty Acyls	Fatty acids and conjugates	C08316	Lipid metabolism	112-86-7	HMDB0002068	BioDeepDB	2	neg	81629.2	94417.5	186503	126752	205493	156710	126601	293091	225989	156015	98378.9	290284	218395	247645	159725	117692	124915	209874	253674	199386	266602	162879	70923.1	112428
M437T402_2	FMN	437.091	401.7	456.105	11.1876	C17H21N4O9P	[M-H2O-H]-	Flavin nucleotides		C00061	Metabolism of cofactors and vitamins; Digestive system; Biosynthesis of other secondary metabolites; Metabolism of terpenoids and polyketides; Energy metabolism; Global and overview maps	146-17-8/6184-17-4	HMDB0001520	BioDeepDB	2	neg	3.26684e+06	3.85604e+06	2.93631e+06	5.25608e+06	5.617e+06	8.19749e+06	4.20601e+06	5.71553e+06	5.38353e+06	9.31678e+06	6.35348e+06	9.01691e+06	4.65391e+06	8.17183e+06	1.15955e+07	8.78149e+06	7.30109e+06	6.39136e+06	5.39234e+06	6.14983e+06	5.66582e+06	6.85964e+06	8.56834e+06	9.42156e+06
M362T97	GMP	362.049	96.9	363.058	4.41929	C10H14N5O8P	[M-H]-	Purine nucleotides	Purine ribonucleotides	C00144	Drug resistance: antineoplastic; Signal transduction; Sensory system; Nucleotide metabolism; Chemical structure transformation maps; Global and overview maps	85-32-5	HMDB0001397	BioDeepDB	2	neg	3.99194e+07	3.42107e+07	4.96494e+07	3.13088e+07	4.85876e+07	2.92743e+07	4.51411e+07	3.1763e+07	4.4838e+07	4.6058e+07	4.09438e+07	4.52709e+07	3.8577e+07	4.09997e+07	5.65184e+07	5.42104e+07	5.09804e+07	4.48791e+07	4.42217e+07	3.73424e+07	4.71035e+07	6.80904e+07	3.67676e+07	3.57483e+07
M186T72	(2R)-2-Hydroxy-3-(phosphonatooxy)propanoate	185.989	72.4	185.993	21.5067	C3H7O7P	[M]-	Carbohydrates and carbohydrate conjugates	Sugar acids and derivatives	C00197	Cancer: overview; Chemical structure transformation maps; Endocrine system; Carbohydrate metabolism; Lipid metabolism; Biosynthesis of other secondary metabolites; Amino acid metabolism; Energy metabolism; Global and overview maps	3443-57-0	HMDB0060180	BioDeepDB	2	neg	1.61201e+06	515903	1.75215e+06	1.65747e+06	1.83386e+06	2.13962e+06	1.123e+06	3.49253e+06	2.14573e+06	1.79007e+06	1.64257e+06	2.11859e+06	1.32171e+06	537513	493662	5.90742e+06	5.55202e+06	1.81038e+06	1.72024e+06	2.20474e+06	529764	1.62835e+06	1.23546e+06	531382
M330T76	dAMP	330.058	75.7	331.068	8.18038	C10H14N5O6P	[M-H]-	Purine nucleotides	Purine deoxyribonucleotides	C00360	Global and overview maps; Nucleotide metabolism	653-63-4	HMDB0000905	BioDeepDB	2	neg	1.43564e+07	6.7543e+06	1.22875e+07	1.03038e+07	1.04359e+07	8.93985e+06	1.0579e+07	8.72413e+06	1.05483e+07	1.04413e+07	1.18585e+07	1.02381e+07	1.63618e+07	1.27351e+07	1.66644e+07	1.2491e+07	1.10409e+07	1.5415e+07	1.50908e+07	1.14128e+07	1.38096e+07	1.12214e+07	1.15811e+07	1.27499e+07
M228T212	Lamivudine	228.052	212.4	229.052	29.2741	C8H11N3O3S	[M-H]-	Nucleoside and nucleotide analogues	3'-thia pyrimidine nucleosides	C07065	Digestive system	134678-17-4/NA	HMDB0014847	BioDeepDB	2	neg	1.35159e+06	1.31257e+06	992645	1.62708e+06	1.04029e+06	96346.4	1.20538e+06	1.29702e+06	1.53405e+06	1.12203e+06	1.04141e+06	1.27685e+06	872141	958206	1.24393e+06	192606	888382	967333	465151	1.60473e+06	851415	877616	91002.4	48494.5
M275T74_2	6-Phosphogluconic acid	275.021	73.9	276.025	13.8171	C6H13O10P	[M-H]-	Organooxygen compounds	Carbohydrates and carbohydrate conjugates	C00345	Carbohydrate metabolism; Global and overview maps	921-62-0/53411-70-4	HMDB0001316	BioDeepDB	2	neg	2.3003e+08	3.15718e+07	1.02068e+08	9.65546e+07	1.36801e+08	9.45845e+07	2.3136e+08	1.35589e+08	7.51835e+07	3.75217e+08	8.94768e+07	9.9561e+07	6.09348e+07	3.83827e+08	6.60256e+07	1.40886e+08	4.11309e+07	1.92929e+08	3.19006e+07	1.86764e+08	4.50768e+07	3.48033e+08	3.651e+07	1.23321e+08
M344T76	Thiamine monophosphate	344.075	75.9	345.079	10.3931	C12H18N4O4PS	[M-H]-	Diazines	Pyrimidines and pyrimidine derivatives	C01081	Metabolism of cofactors and vitamins; Global and overview maps	495-23-8/532-40-1	HMDB0002666	BioDeepDB	2	neg	4.18659e+06	2.33341e+06	3.58058e+06	2.47006e+06	2.00225e+06	2.17606e+06	3.85047e+06	4.34998e+06	2.58644e+06	3.53842e+06	4.39781e+06	4.60381e+06	2.96235e+06	3.67811e+06	4.54335e+06	5.52038e+06	3.42177e+06	5.68424e+06	3.99718e+06	4.3436e+06	3.42426e+06	4.49605e+06	2.07012e+06	3.40094e+06
M229T78	D-Ribulose 5-phosphate	229.011	77.7	230.019	2.61996	C5H11O8P	[M-H]-	Carbohydrates and carbohydrate conjugates	Monosaccharides	C00199	Metabolism of cofactors and vitamins; Carbohydrate metabolism; Glycan biosynthesis and metabolism; Energy metabolism; Global and overview maps	4151-19-3/551-85-9	HMDB0000618	BioDeepDB	2	neg	1.75635e+08	1.48525e+08	2.37605e+08	1.31099e+08	1.18774e+08	1.29321e+08	1.40344e+08	1.69927e+08	1.59273e+08	1.49302e+08	1.58255e+08	1.21749e+08	1.85949e+08	1.6574e+08	2.50037e+08	1.92375e+08	2.54658e+08	2.06305e+08	2.88305e+08	2.3739e+08	2.35932e+08	2.76735e+08	2.61387e+08	1.86053e+08
M177T79	Pyrophosphate	176.935	78.7	177.943	2.26071	H4P2O7	[M-H]-	Non-metal oxoanionic compounds	Non-metal pyrophosphates	C00013	Energy metabolism; Neurodegenerative disease	14000-31-8/2466-09-3	HMDB0000250	BioDeepDB	2	neg	5.42901e+08	6.53362e+08	6.87947e+08	6.96183e+08	5.34854e+08	6.07112e+08	4.60961e+08	8.35236e+08	1.01424e+09	1.10899e+09	1.14206e+09	1.25577e+09	7.22482e+08	9.49659e+08	1.01415e+09	1.1657e+09	1.14802e+09	1.29491e+09	7.30369e+08	1.58382e+09	1.05964e+09	1.30417e+09	1.27477e+09	9.37473e+08
M182T81	L-Homocysteic acid	182.013	80.6	183.02	0.681271	C4H9NO5S	[M-H]-	Carboxylic acids and derivatives	Amino acids, peptides, and analogues	C16511	Signaling molecules and interaction	14857-77-3	HMDB0002205	BioDeepDB	2	neg	1.30915e+07	1.19693e+07	1.26525e+07	1.25437e+07	1.60953e+07	9.20236e+06	1.52065e+07	1.68809e+07	1.37967e+07	2.60741e+07	2.40068e+07	1.8439e+07	1.17114e+07	1.05261e+07	1.08745e+07	8.75878e+06	7.37878e+06	6.40838e+06	4.91656e+06	7.09856e+06	8.93714e+06	9.56994e+06	1.12013e+07	1.35119e+07
M243T122_2	Azacitidine	243.081	121.9	244.081	28.6983	C8H12N4O5	[M-H]-	Organooxygen compounds	Carbohydrates and carbohydrate conjugates	C11262		320-67-2	HMDB0015063	BioDeepDB	2	neg	1.77778e+06	1.67235e+06	1.46911e+06	2.02924e+06	9.7643e+06	7.87371e+06	6.08718e+06	1.32637e+06	1.56533e+06	6.95608e+06	1.29723e+07	1.58276e+06	6.56755e+06	6.87949e+06	6.60735e+06	7.0801e+06	7.53798e+06	5.76985e+06	3.78108e+06	5.01113e+06	1.01248e+07	5.39822e+06	6.96984e+06	1.29541e+06
M254T611	Daidzein	254.054	611.1	254.058	16.9256	C15H10O4	[M]-	Isoflavonoids	Isoflav-2-enes	C10208	Chemical structure transformation maps; Biosynthesis of other secondary metabolites; Global and overview maps	486-66-8	HMDB0003312	BioDeepDB	2	neg	143359	179830	125182	195670	121425	136159	150905	207407	129709	72497.1	31284.6	55815.6	203434	21445	353414	142969	224133	34459.4	191874	164707	178164	119132	159938	159979
M229T529	Dodecanedioic acid	229.144	529.3	230.152	3.05485	C12H22O4	[M-H]-	Fatty Acyls	Fatty acids and conjugates	C02678		693-23-2	HMDB0000623	BioDeepDB	2	neg	1.49837e+06	1.32587e+06	1.43047e+06	1.66025e+06	1.33217e+06	1.34321e+06	1.44268e+06	1.31604e+06	1.58904e+06	1.69791e+06	1.61096e+06	1.37493e+06	1.97135e+06	2.14089e+06	1.58354e+06	1.50731e+06	1.23564e+06	1.34746e+06	1.60295e+06	1.57877e+06	1.37891e+06	1.32501e+06	1.67846e+06	1.41001e+06
M188T301	Miglitol	188.093	300.6	207.111	2.6051	C8H17NO5	[M-H2O-H]-	Piperidines		C07708		72432-03-2	HMDB0014634	BioDeepDB	2	neg	3.0976e+06	4.12971e+06	3.36031e+06	4.69767e+06	3.40103e+06	3.65333e+06	3.67564e+06	5.5683e+06	2.75991e+06	5.20154e+06	2.5552e+06	3.90579e+06	3.51611e+06	5.01683e+06	3.44092e+06	3.01227e+06	2.23832e+06	2.17783e+06	2.35507e+06	2.54729e+06	2.17119e+06	3.80926e+06	3.48547e+06	5.31415e+06
M151T91_2	D-Xylitol	151.061	90.6	152.069	0	C5H12O5	[M-H]-	Organooxygen compounds	Carbohydrates and carbohydrate conjugates	C00379	Carbohydrate metabolism; Membrane transport; Global and overview maps	87-99-0	HMDB0002917	BioDeepDB	2	neg	1.31769e+07	3.94424e+07	1.12537e+07	1.29244e+07	6.92066e+06	1.25316e+07	7.74081e+06	1.46395e+07	1.74711e+07	1.10472e+07	4.0064e+07	1.86365e+07	1.25308e+07	1.25332e+07	1.72564e+07	8.02568e+06	1.0252e+07	3.73497e+07	3.65405e+07	2.13208e+07	3.24725e+07	3.58058e+07	3.17778e+07	4.42371e+07
M588T91_1	GDP-L-fucose	588.071	90.6	589.082	6.50262	C16H25N5O15P2	[M-H]-	Purine nucleotides	Purine nucleotide sugars	C00325	Carbohydrate metabolism; Glycan biosynthesis and metabolism; Global and overview maps	15839-70-0/NA	HMDB0001095	BioDeepDB	2	neg	1.1139e+06	1.21735e+06	1.14379e+06	1.11163e+06	1.32955e+06	1.21403e+06	819388	1.18663e+06	1.11068e+06	1.60449e+06	1.84511e+06	1.22648e+06	1.63563e+06	1.9582e+06	1.16377e+06	1.76768e+06	1.06637e+06	1.08202e+06	989383	885772	1.40168e+06	1.01924e+06	978548	1.07172e+06
M169T91	Gallic acid	169.018	91.1	170.022	20.5659	C7H6O5	[M-H]-	Benzene and substituted derivatives	Benzoic acids and derivatives	C01424	Chemical structure transformation maps; Xenobiotics biodegradation and metabolism; Global and overview maps	149-91-7	HMDB0005807	BioDeepDB	2	neg	2.72974e+06	1.71714e+06	2.68419e+06	1.84254e+06	2.66877e+06	2.81088e+06	1.50093e+06	1.33745e+06	2.79986e+06	2.92138e+06	2.79811e+06	2.1569e+06	2.21764e+06	3.46749e+06	2.38183e+06	3.56742e+06	2.3087e+06	2.62318e+06	2.25106e+06	2.75636e+06	1.88663e+06	2.20057e+06	2.12806e+06	1.27551e+06
M103T92	(R)-3-Hydroxybutyric acid	103.04	92.2	104.047	2.17392	C4H8O3	[M-H]-	Hydroxy acids and derivatives	Beta hydroxy acids and derivatives	C01089	Carbohydrate metabolism; Signal transduction; Global and overview maps	625-72-9/300-85-6	HMDB0000011	BioDeepDB	2	neg	1.17277e+08	2.72369e+08	1.37776e+08	2.69904e+07	1.42797e+08	6.73136e+07	1.12052e+08	3.18693e+08	2.84611e+08	9.22085e+07	3.64422e+07	1.65817e+08	8.35082e+07	1.27019e+07	4.43356e+07	1.72831e+07	3.10153e+07	2.15353e+07	2.07036e+07	2.66972e+07	1.88775e+07	1.48006e+07	1.09933e+07	2.92638e+06
M129T96	Cyanuric acid	129.019	96.4	129.017	15.5015	C3H3N3O3	[M]-	Triazines	1,3,5-triazines	C06554	Xenobiotics biodegradation and metabolism; Global and overview maps	108-80-5/504-19-8	HMDB0041861	BioDeepDB	2	neg	4.06699e+06	2.00143e+06	1.85512e+07	2.45084e+06	3.15663e+06	4.20159e+06	4.23593e+07	1.46488e+07	1.83041e+07	3.61783e+06	1.76936e+07	1.02907e+07	2.03931e+07	3.58129e+06	1.41559e+07	2.06376e+07	4.44517e+07	1.23191e+07	2.35919e+07	2.98458e+07	2.85349e+07	4.96366e+07	8.54158e+06	6.08263e+06
M101T98	2-Ketobutyric acid	101.024	97.5	102.032	0.989861	C4H6O3	[M-H]-	Keto acids and derivatives	Short-chain keto acids and derivatives	C00109	Carbohydrate metabolism; Amino acid metabolism; Global and overview maps	600-18-0	HMDB0000005	BioDeepDB	2	neg	6.03211e+06	1.37386e+07	7.6426e+06	9.51063e+06	9.42999e+06	1.61784e+07	1.03241e+07	1.58819e+07	8.94169e+06	1.83493e+07	1.05597e+07	8.44525e+06	7.46254e+06	1.74585e+07	8.0954e+06	1.90076e+07	6.7736e+06	1.37499e+07	8.47864e+06	8.9274e+06	8.88263e+06	1.84199e+07	7.43856e+06	1.00038e+07
M168T100_2	1-Methylhistidine	168.078	100.3	169.085	0	C7H11N3O2	[M-H]-	Carboxylic acids and derivatives	Amino acids, peptides, and analogues	C01152	Amino acid metabolism; Global and overview maps	332-80-9/368-16-1	HMDB0000001	BioDeepDB	2	neg	4.0798e+06	2.14383e+06	9.43017e+06	2.03257e+06	3.16769e+06	5.23114e+06	2.677e+06	2.59564e+06	2.45417e+06	3.54232e+06	3.85195e+06	3.1698e+06	4.24725e+06	1.23378e+06	6.93234e+06	4.88382e+06	908057	4.98465e+06	4.17478e+06	1.93196e+06	5.38279e+06	6.90483e+06	6.06543e+06	6.66161e+06
M127T121	Adipic acid	127.04	121.2	146.058	3.85705	C6H10O4	[M-H2O-H]-	Fatty Acyls	Fatty acids and conjugates	C06104	Xenobiotics biodegradation and metabolism; Global and overview maps	124-04-9	HMDB0000448	BioDeepDB	2	neg	3.07563e+07	4.72385e+07	2.56706e+07	4.12196e+07	3.9287e+07	4.09624e+07	2.5643e+07	2.23766e+07	3.24481e+07	4.70569e+07	2.6321e+07	2.20589e+07	3.62713e+07	7.18422e+07	4.86294e+07	7.14057e+07	3.51477e+07	4.9806e+07	4.70596e+07	2.60317e+07	5.3512e+07	5.30117e+07	8.35884e+07	7.40805e+07
M148T122	L-Methionine	148.044	121.7	149.051	0.675475	C5H11NO2S	[M-H]-	Carboxylic acids and derivatives	Amino acids, peptides, and analogues	C00073	Cancer: overview; Drug resistance: antineoplastic; Digestive system; Biosynthesis of other secondary metabolites; Translation; Amino acid metabolism; Chemical structure transformation maps; Global and overview maps	63-68-3	HMDB0000696	BioDeepDB	2	neg	2.86309e+07	4.59056e+07	6.55969e+07	3.77078e+07	5.28342e+07	3.77227e+07	7.40765e+07	4.10482e+07	4.29755e+07	6.2931e+07	3.09977e+07	4.36644e+07	8.27706e+07	6.78854e+07	6.58869e+07	3.27195e+07	3.43201e+07	4.3655e+07	8.48986e+07	6.67088e+07	7.91608e+07	7.4069e+07	3.67729e+07	3.26378e+07
M171T113	Hydantoin-5-propionic acid	171.041	112.7	172.048	1.75397	C6H8N2O4	[M-H]-	Azolidines	Imidazolidines	C05565	Amino acid metabolism	5624-26-0	HMDB0001212	BioDeepDB	2	neg	328054	329858	444590	512015	587318	284941	779261	683733	586959	285326	1.12114e+06	339443	489029	504116	378321	400426	419467	352078	353140	398611	215210	335579	131558	163613
M135T122	Hypoxanthine	135.031	121.9	136.038	0	C5H4N4O	[M-H]-	Imidazopyrimidines	Purines and purine derivatives	C00262	Global and overview maps; Nucleotide metabolism	68-94-0	HMDB0000157	BioDeepDB	2	neg	9.02346e+08	2.53612e+09	6.42585e+08	2.72171e+09	1.0328e+09	9.08379e+08	6.36427e+08	5.42777e+08	1.0408e+09	1.23418e+09	9.03516e+08	8.05714e+08	4.61979e+08	7.47568e+08	8.28155e+08	7.25102e+08	3.45646e+08	6.32078e+08	3.78718e+08	5.02071e+08	3.97222e+08	4.50551e+08	5.68606e+08	4.28482e+08
M181T154	Hydroxyphenyllactic acid	181.05	153.8	182.058	0.552332	C9H10O4	[M-H]-	Phenylpropanoic acids		C03672		306-23-0	HMDB0000755	BioDeepDB	2	neg	1.49372e+06	1.98545e+06	1.46749e+06	1.8839e+06	2.49994e+06	1.3085e+06	1.33545e+06	1.9899e+06	1.58249e+06	2.3385e+06	2.40301e+06	1.82174e+06	1.07585e+07	1.01066e+07	7.65001e+06	4.29272e+06	3.49946e+06	4.90017e+06	1.40041e+06	1.607e+06	2.28651e+06	1.94359e+06	3.18978e+06	9.34762e+06
M313T769	9,10-DHOME	313.236	769.4	314.246	6.0657	C18H34O4	[M-H]-	Fatty Acyls	Fatty acids and conjugates	C14828	Lipid metabolism	263399-34-4	HMDB0004704	BioDeepDB	2	neg	1.09576e+07	1.03374e+07	8.12053e+06	1.31759e+07	9.17397e+06	2.91962e+06	8.51652e+06	1.00977e+07	1.12933e+07	1.12775e+07	9.00472e+06	1.3884e+07	6.25727e+06	8.88076e+06	9.43793e+06	1.15875e+07	7.90111e+06	8.9078e+06	3.32895e+06	1.15245e+07	9.27847e+06	4.03387e+06	6.49526e+06	1.46562e+07
M176T147	N-Formyl-L-methionine	176.039	147.3	177.046	0.431723	C6H11NO3S	[M-H]-	Carboxylic acids and derivatives	Amino acids, peptides, and analogues	C03145	Amino acid metabolism	4289-98-9	HMDB0001015	BioDeepDB	2	neg	2.94849e+06	2.81484e+06	1.92853e+06	1.64284e+06	2.16059e+06	965376	2.55596e+06	1.46327e+06	747710	774165	1.49489e+06	1.0131e+06	300307	287808	1.94731e+06	1.37649e+06	314382	1.25652e+06	791356	787308	218863	474300	224679	185773
M151T151	Xanthine	151.026	151	152.033	0.503224	C5H4N4O2	[M-H]-	Imidazopyrimidines	Purines and purine derivatives	C00385	Chemical structure transformation maps; Biosynthesis of other secondary metabolites; Global and overview maps; Nucleotide metabolism	69-89-6	HMDB0000292	BioDeepDB	2	neg	1.84113e+08	9.78924e+07	1.50423e+08	1.3464e+08	1.49425e+08	1.67542e+08	2.08861e+08	7.84349e+07	1.37182e+08	1.66005e+08	1.72641e+08	1.50364e+08	1.88184e+08	2.55022e+08	1.78817e+08	8.09784e+07	7.73818e+07	1.67644e+08	4.65158e+07	1.62313e+08	1.50441e+08	1.7793e+08	1.72757e+08	1.67329e+08
M133T153	L-Malic acid	133.013	153.5	134.022	5.26262	C4H6O5	[M-H]-	Fatty Acyls	Fatty acids and conjugates	C00149	Cancer: overview; Chemical structure transformation maps; Signal transduction; Sensory system; Endocrine system; Excretory system; Carbohydrate metabolism; Cancer: specific types; Energy metabolism; Global and overview maps	636-61-3	HMDB0031518	BioDeepDB	2	neg	1.00563e+07	1.14869e+07	9.72496e+06	8.34097e+06	9.81371e+06	6.47441e+06	1.07602e+07	9.52294e+06	1.0633e+07	1.15464e+07	9.95218e+06	1.43656e+07	1.19735e+07	9.6653e+06	1.56685e+07	1.02539e+07	1.4067e+07	1.65162e+07	1.58975e+07	1.37758e+07	1.18908e+07	1.70659e+07	9.812e+06	1.0218e+07
M131T236	Beta-Guanidinopropionic acid	131.071	236.3	131.07	14.4959	C4H9N3O2	[M]-	Organonitrogen compounds	Guanidines	C03065		353-09-3	HMDB0013222	BioDeepDB	2	neg	2.46072e+06	1.28787e+07	1.40439e+06	1.63096e+06	1.08652e+06	873151	1.66805e+06	1.38092e+06	511380	1.52198e+06	1.97127e+06	440176	507934	523545	684865	747345	1.54461e+06	688093	865799	902497	514157	649895	2.65819e+06	928123
M134T243	Adenine	134.047	243.4	135.054	0	C5H5N5	[M-H]-	Imidazopyrimidines	Purines and purine derivatives	C00147	Metabolism of terpenoids and polyketides; Global and overview maps; Nucleotide metabolism	73-24-5	HMDB0000034	BioDeepDB	2	neg	1.99755e+07	1.17207e+08	1.06068e+07	1.14154e+07	8.64984e+06	5.79148e+06	1.3329e+07	1.03397e+07	3.92079e+06	1.23097e+07	1.81418e+07	2.45653e+06	1.96481e+06	2.17795e+06	4.45653e+06	4.37894e+06	1.04042e+07	3.53926e+06	3.97599e+06	5.32207e+06	3.19298e+06	4.54222e+06	2.09088e+07	5.10276e+06
M267T251_1	Inosine	267.073	250.8	268.081	0.748858	C10H12N4O5	[M-H]-	Purine nucleosides		C00294	Membrane transport; Global and overview maps; Nucleotide metabolism	58-63-9	HMDB0000195	BioDeepDB	2	neg	1.74474e+09	4.13447e+08	1.19042e+09	9.43838e+08	3.64178e+08	1.02983e+09	9.98148e+08	3.26358e+09	2.64199e+09	4.49286e+08	4.41196e+08	1.64422e+09	1.66912e+09	3.84037e+08	6.11922e+08	4.06131e+08	2.09671e+09	1.63375e+09	4.92363e+08	1.0843e+09	4.52617e+08	4.69264e+08	4.49766e+08	4.71218e+08
M115T111_2	alpha-Ketoisovaleric acid	115.04	111.4	116.047	0.277156	C5H8O3	[M-H]-	Keto acids and derivatives	Short-chain keto acids and derivatives	C00141	Amino acid metabolism; Metabolism of cofactors and vitamins; Biosynthesis of other secondary metabolites; Global and overview maps	759-05-7	HMDB0000019	MoNA	2	neg	3.46969e+06	3.55494e+06	3.39083e+06	3.62876e+06	3.49632e+06	2.88358e+06	3.43564e+06	2.84869e+06	2.76288e+06	4.46927e+06	3.30936e+06	3.16366e+06	3.90146e+06	3.15631e+06	3.21367e+06	4.33934e+06	3.82818e+06	4.34146e+06	3.57301e+06	4.50334e+06	1.59155e+06	3.99748e+06	3.50491e+06	3.69073e+06
M159T465	3-Hydroxyvalproic acid	159.102	465.1	160.11	0.779372	C8H16O3	[M-H]-	Fatty Acyls	Fatty acids and conjugates	C16651	Xenobiotics biodegradation and metabolism	58888-84-9	HMDB0013899	BioDeepDB	2	neg	1.64093e+06	2.22964e+06	3.44925e+06	2.11159e+06	2.7023e+06	3.21417e+06	4.88902e+06	1.41458e+07	6.32317e+06	3.48655e+07	6.79583e+07	2.58348e+07	1.88872e+07	2.12503e+07	3.77442e+06	1.36002e+07	3.32377e+07	4.20975e+06	3.97281e+06	2.639e+07	5.56623e+07	5.39395e+07	1.95413e+07	1.08942e+08
M172T447	Quinaldic acid	172.041	447.2	173.048	0.441756	C10H7NO2	[M-H]-	Quinolines and derivatives	Quinoline carboxylic acids	C06325		93-10-7	HMDB0000842	BioDeepDB	2	neg	722013	623155	843369	823566	721858	443756	723851	436764	710521	871619	376161	924339	1.07043e+06	797312	672547	685314	669503	649467	564728	573928	540202	1.12696e+06	301448	739112
M209T483	Jasmonic acid	209.118	482.9	210.126	0.36343	C12H18O3	[M-H]-	Fatty Acyls	Lineolic acids and derivatives	C08491	Lipid metabolism; Signal transduction; Chemical structure transformation maps; Global and overview maps	59366-47-1/6894-38-8	HMDB0032797	BioDeepDB	2	neg	2.31269e+06	1.92524e+06	2.71611e+06	710592	1.33371e+06	1.32935e+06	1.59353e+06	2.03704e+06	1.03192e+06	386843	1.48725e+06	2.1177e+06	353804	47244.7	1.20078e+06	1.19287e+06	952919	1.84446e+06	934478	1.32631e+06	633356	1.00141e+06	53904	73596.1
M151T603	3-Hydroxyphenylacetic acid	151.04	603.2	152.047	0.211096	C8H8O3	[M-H]-	Phenols	1-hydroxy-4-unsubstituted benzenoids	C05593	Amino acid metabolism; Xenobiotics biodegradation and metabolism; Global and overview maps	621-37-4	HMDB0000440	MoNA	2	neg	2.39336e+06	3.46131e+06	3.69165e+06	757190	3.83162e+06	2.22561e+06	3.5074e+06	2.93898e+06	3.31974e+06	1.34921e+06	4.55378e+06	3.32113e+06	5.41242e+06	1.70117e+06	4.98307e+06	3.92247e+06	1.25516e+06	6.68181e+06	1.82827e+06	3.15394e+06	1.27439e+06	1.34914e+06	1.99211e+06	2.16571e+06
M369T537_2	6-Keto-prostaglandin F1a	369.227	536.6	370.236	3.31503	C20H34O6	[M-H]-	Fatty Acyls	Eicosanoids	C05961	Lipid metabolism; Global and overview maps	58962-34-8	HMDB0002886	BioDeepDB	2	neg	5.07848e+07	2.02976e+07	3.79484e+07	3.00705e+07	5.52049e+07	4.73357e+07	6.13921e+07	4.25292e+07	4.17329e+07	4.87899e+07	6.77413e+07	5.36178e+07	5.55717e+07	5.04276e+07	4.9793e+07	4.51065e+07	5.45387e+07	5.09104e+07	3.51047e+07	4.2619e+07	5.9249e+07	5.78864e+07	5.67022e+07	4.49086e+07
M369T590	Thromboxane B2	369.229	590.4	370.236	0.812505	C20H34O6	[M-H]-	Fatty Acyls	Eicosanoids	C05963	Lipid metabolism; Nervous system; Global and overview maps; Digestive system	54397-85-2	HMDB0003252	BioDeepDB	2	neg	1.44984e+06	1.00888e+06	1.90371e+06	2.3131e+06	2.64981e+06	1.19657e+06	2.0897e+06	1.12347e+06	2.70172e+06	549197	2.92195e+06	4.17268e+06	2.00451e+06	1.89105e+06	2.05042e+06	4.16267e+06	1.64826e+06	1.75906e+06	2.13212e+06	4.29383e+06	2.84646e+06	2.08871e+06	625297	1.14386e+06
M355T621	Prostaglandin F1a	355.239	620.6	356.256	27.3055	C20H36O5	[M-H]-	Fatty Acyls	Eicosanoids	C06475		745-62-0	HMDB0002685	BioDeepDB	2	neg	347518	248597	241178	281739	454790	232818	528806	299164	283024	283626	285179	268926	328864	142294	338443	310493	320848	299351	279387	419282	288938	366038	457207	150575
M325T793	11-Dehydrocorticosterone	325.184	792.6	344.199	11.0399	C21H28O4	[M-H2O-H]-	Steroids and steroid derivatives	Hydroxysteroids	C05490	Lipid metabolism	72-23-1	HMDB0004029	BioDeepDB	2	neg	9.96022e+06	1.06111e+07	8.82127e+06	3.91481e+07	2.54374e+07	8.22941e+06	1.11637e+07	3.27687e+07	9.52361e+06	4.79367e+07	7.1242e+06	4.25452e+06	9.76901e+07	3.76994e+07	3.61179e+07	1.11364e+07	1.26181e+07	1.05639e+07	1.10992e+07	2.78179e+07	2.54114e+07	4.06673e+07	1.06811e+08	4.31283e+07
M351T717	Prostaglandin D2	351.217	716.5	352.225	2.27779	C20H32O5	[M-H]-	Fatty Acyls	Eicosanoids	C00696	Nervous system; Lipid metabolism; Signaling molecules and interaction; Immune disease; Immune system; Infectious disease: parasitic; Global and overview maps	41598-07-6	HMDB0001403	BioDeepDB	2	neg	9.44604e+06	4.58745e+06	3.44983e+06	4.2347e+06	7.04322e+06	7.15678e+06	9.20823e+06	1.15557e+07	1.58206e+07	1.67449e+07	7.24032e+06	4.55495e+06	4.95647e+06	2.8949e+06	4.88724e+06	6.02005e+06	5.46774e+06	1.77481e+06	4.89947e+06	2.11441e+06	1.21408e+07	2.92221e+06	5.85577e+06	1.71808e+07
M335T747	11b-PGF2a	335.221	747.5	354.241	3.01294	C20H34O5	[M-H2O-H]-	Fatty Acyls	Eicosanoids	C05959	Lipid metabolism	38432-87-0	HMDB0010199	BioDeepDB	2	neg	3.9993e+06	3.44653e+06	2.40485e+06	2.77621e+06	2.41368e+06	2.10987e+06	3.19433e+06	1.44541e+06	3.09698e+06	2.47236e+06	1.29695e+06	1.89637e+06	4.13949e+06	3.69986e+06	5.4559e+06	3.70473e+06	3.72036e+06	3.46391e+06	2.69767e+06	4.69977e+06	4.80535e+06	2.3682e+06	2.57634e+06	2.71513e+06
M311T799	9(S)-HPODE	311.221	799	312.23	4.49841	C18H32O4	[M-H]-	Fatty Acyls	Lineolic acids and derivatives	C14827	Lipid metabolism; Global and overview maps	29774-12-7	HMDB0006940	BioDeepDB	2	neg	1.30904e+07	5.11796e+06	5.18418e+06	1.99061e+07	7.26369e+06	1.02447e+07	5.23538e+06	5.94465e+06	6.84101e+06	1.58366e+07	3.53339e+06	2.95436e+06	1.72285e+07	6.80919e+06	1.18684e+07	1.19327e+07	7.3408e+06	3.36266e+06	3.0428e+06	2.62998e+06	1.36454e+06	2.22903e+06	1.96263e+06	9.94941e+06
M334T765	Prostaglandin B2	334.205	764.6	334.214	27.8272	C20H30O4	[M]-	Fatty Acyls	Eicosanoids	C05954	Lipid metabolism; Nervous system; Global and overview maps	13367-85-6	HMDB0004236	BioDeepDB	2	neg	4.13507e+06	4.06072e+06	3.77622e+06	1.41794e+06	3.60491e+06	2.58258e+06	3.5581e+06	4.33383e+06	4.45073e+06	4.23226e+06	5.04717e+06	3.89997e+06	4.32495e+06	4.84768e+06	3.62086e+06	5.09258e+06	3.96665e+06	3.64782e+06	4.69557e+06	4.48702e+06	3.45824e+06	4.19691e+06	3.95307e+06	5.41214e+06
M337T783	14,15-DiHETrE	337.238	783.1	338.246	1.48263	C20H34O4	[M-H]-	Fatty Acyls	Eicosanoids	C14775	Lipid metabolism; Nervous system; Global and overview maps	77667-09-5/NA	HMDB0002265	BioDeepDB	2	neg	5.23166e+06	3.22651e+06	1.05723e+06	1.01981e+07	1.00887e+06	3.45915e+06	4.00507e+06	1.9317e+06	3.72663e+06	1.76151e+06	1.33332e+06	3.26832e+06	6.32715e+06	1.25874e+06	1.35933e+06	1.23731e+06	3.07989e+06	1.85332e+06	934774	2.85607e+06	1.73467e+06	2.03792e+06	1.1929e+06	1.41295e+06
M329T822_2	Docosapentaenoic acid (22n-3)	329.257	822.1	330.256	26.6539	C22H34O2	[M-H]-	Fatty Acyls	Fatty acids and conjugates	C16513	Lipid metabolism	24880-45-3	HMDB0006528	BioDeepDB	2	neg	1.7141e+08	3.90753e+08	9.15981e+07	4.06842e+08	9.76048e+07	1.33103e+08	4.8017e+07	3.71247e+07	2.87336e+07	8.00658e+07	4.15374e+07	1.70102e+07	2.16675e+07	1.64142e+08	1.68796e+08	1.61313e+08	1.83228e+07	1.18929e+08	2.7283e+07	1.27317e+07	1.279e+07	1.61075e+07	8.87996e+07	5.3308e+07
M279T812	Bovinic acid	279.229	811.9	280.24	12.2623	C18H32O2	[M-H]-	Fatty Acyls	Lineolic acids and derivatives	C04056	Lipid metabolism	2540-56-9	HMDB0003797	BioDeepDB	2	neg	8.09309e+07	1.37818e+08	1.82936e+07	8.9618e+07	2.25344e+07	6.67798e+07	1.22516e+08	4.32481e+07	1.16373e+08	1.04946e+08	5.6551e+07	8.42243e+07	4.49743e+08	6.93285e+08	3.42485e+08	2.21326e+08	8.48971e+07	4.31604e+07	3.08023e+08	5.08965e+07	6.64786e+07	2.27703e+08	1.89038e+08	1.24529e+08
M293T812	9-OxoODE	293.211	812	294.219	2.72841	C18H30O3	[M-H]-	Fatty Acyls	Lineolic acids and derivatives	C14766	Lipid metabolism	54232-59-6	HMDB0004669	BioDeepDB	2	neg	4.66924e+06	8.6548e+06	7.68804e+06	9.42529e+06	9.93632e+06	7.98048e+06	7.18226e+06	2.84826e+06	6.22694e+06	1.49784e+07	5.2648e+06	5.20643e+06	3.41951e+07	6.92833e+07	1.54157e+07	2.17139e+07	2.84358e+07	1.94519e+07	1.38941e+07	1.48385e+07	4.79986e+07	2.20789e+07	3.13783e+07	2.61283e+07
M295T816	13S-hydroxyoctadecadienoic acid	295.227	815.9	296.235	1.43618	C18H32O3	[M-H]-	Fatty Acyls	Lineolic acids and derivatives	C14762	Lipid metabolism; Endocrine system	5204-88-6/29623-28-7	HMDB0004667	BioDeepDB	2	neg	2.55252e+07	7.62506e+07	1.2319e+07	6.34079e+07	2.10722e+07	2.97092e+07	1.53363e+07	9.47748e+06	8.4596e+06	1.82945e+07	9.29323e+06	2.54926e+06	1.17235e+07	3.28388e+07	2.99619e+07	3.12971e+07	6.16204e+06	2.72491e+07	3.32078e+06	5.5085e+06	5.15037e+06	6.78787e+06	2.49049e+07	2.17134e+07
M327T837_2	Docosahexaenoic acid	327.231	836.8	328.24	4.35166	C22H32O2	[M-H]-	Fatty Acyls	Fatty acids and conjugates	C06429	Lipid metabolism	6217-54-5	HMDB0002183	BioDeepDB	2	neg	6.63342e+07	1.76682e+07	6.01013e+07	2.00396e+07	1.62729e+07	1.8415e+07	8.23241e+07	9.47596e+07	8.08987e+07	9.03187e+07	1.14745e+08	1.11657e+08	3.67327e+07	5.97711e+07	2.82109e+07	5.06318e+07	1.05232e+08	2.64183e+07	6.27381e+07	1.17245e+08	8.78096e+07	1.0946e+08	1.33137e+07	1.94404e+07
M282T838	Vaccenic acid	282.252	838	282.256	12.7545	C18H34O2	[M]-	Fatty Acyls	Fatty acids and conjugates	C08367		693-72-1	HMDB0003231	BioDeepDB	2	neg	1.70558e+07	1.06789e+07	1.65438e+07	2.36595e+07	1.63858e+07	1.21745e+07	1.69572e+07	1.69922e+07	2.30864e+07	3.4376e+07	6.09133e+06	8.29811e+06	7.19592e+06	2.15325e+07	2.81169e+07	1.99398e+07	1.24044e+07	9.16414e+06	1.35386e+07	1.39328e+07	1.52239e+07	1.54753e+07	3.01422e+07	2.32797e+07
M319T829	19(S)-HETE	319.227	829.5	320.235	1.64146	C20H32O3	[M-H]-	Fatty Acyls	Eicosanoids	C14749	Lipid metabolism; Global and overview maps	79551-85-2/115461-40-0	HMDB0011136	BioDeepDB	2	neg	8.53921e+06	8.85976e+06	2.216e+07	8.49604e+06	1.88199e+07	1.44358e+07	2.0924e+07	8.31936e+06	3.04742e+07	2.74498e+07	2.39877e+07	3.25762e+07	2.40325e+07	3.24874e+07	2.25898e+07	2.11412e+07	3.2117e+07	1.13145e+07	1.95556e+07	3.11461e+07	2.54207e+07	1.35943e+07	2.55833e+07	3.27581e+07
M306T96	(-)-Epigallocatechin	306.076	95.9	306.074	5.55418	C15H14O7	[M]-	Flavonoids	Flavans	C12136	Biosynthesis of other secondary metabolites; Global and overview maps	970-74-1	HMDB0038361	MoNA	2	neg	5.3227e+07	7.536e+07	1.4411e+08	5.2656e+07	1.81538e+08	9.4143e+07	1.27857e+08	5.94387e+07	4.18598e+07	1.0663e+07	1.73018e+08	9.75356e+06	8.4414e+07	2.39639e+07	1.12446e+08	1.36862e+08	1.04966e+08	5.06747e+07	1.35192e+08	1.9606e+08	1.02997e+08	1.67134e+08	1.57849e+08	1.20595e+07
M138T637	6-Hydroxynicotinic acid	138.02	637	139.027	0.238951	C6H5NO3	[M-H]-	Pyridines and derivatives	Pyridinecarboxylic acids and derivatives	C01020	Metabolism of cofactors and vitamins; Global and overview maps	5006-66-6	HMDB0002658	MoNA	2	neg	318821	716989	760285	840410	995884	1.17429e+06	1.80827e+06	1.11099e+06	760263	1.6545e+06	1.014e+06	838355	851509	396098	252119	781596	382424	696861	432373	653375	484265	455944	323770	424630
M171T78	Beta-Glycerophosphoric acid	171.006	77.7	172.014	0.00796461	C3H9O6P	[M-H]-	Glycerophospholipids	Glycerophosphates	C02979		17181-54-3	HMDB0002520	MoNA	2	neg	6.98946e+07	6.3791e+07	6.32765e+07	6.2202e+07	1.6364e+08	7.94075e+07	5.05972e+07	5.22996e+07	3.48066e+07	5.84762e+07	1.0275e+08	2.96542e+07	4.34308e+07	4.47134e+07	2.71673e+07	2.96681e+07	8.96275e+06	9.31002e+06	9.44535e+06	6.89804e+06	2.38676e+07	8.7092e+06	1.03259e+07	9.28628e+06
M324T81	N-Glycolylneuraminic acid	324.094	81.5	325.101	0.2345	C11H19NO10	[M-H]-	Organooxygen compounds	Carbohydrates and carbohydrate conjugates	C03410	Carbohydrate metabolism	1113-83-3	HMDB0000833	MoNA	2	neg	3.40156e+07	2.40694e+07	4.02674e+07	3.30318e+07	2.12708e+08	3.32407e+07	3.76383e+07	1.48719e+08	2.97304e+07	4.74266e+07	6.38412e+07	5.55583e+07	6.66542e+07	5.90244e+07	9.06056e+07	1.00173e+08	1.09327e+08	9.99764e+07	6.64916e+07	4.98472e+07	6.96332e+07	7.35849e+07	7.86182e+07	9.55907e+07
M129T88	Citramalic acid	129.019	88.3	148.037	4.57296	C5H8O5	[M-H2O-H]-	Fatty Acyls	Fatty acids and conjugates	C00815		597-44-4/2306-22-1	HMDB0000426	MoNA	2	neg	8.88109e+06	2.93327e+07	2.40652e+07	2.2125e+07	3.5417e+07	7.69942e+06	2.51803e+07	2.76675e+07	2.75644e+07	2.7339e+07	8.71074e+06	8.99054e+06	2.91375e+07	2.85914e+07	7.47484e+06	7.72911e+06	2.71437e+07	3.6353e+07	3.05942e+07	2.67214e+07	2.99486e+07	3.57713e+07	2.53185e+07	7.96679e+06
M378T122_1	S-Lactoylglutathione	378.096	121.6	379.105	4.55969	C13H21N3O8S	[M-H]-	Carboxylic acids and derivatives	Amino acids, peptides, and analogues	C03451	Carbohydrate metabolism; Global and overview maps	25138-66-3/41656-56-8	HMDB0001066	MoNA	2	neg	1.57237e+07	1.04186e+07	1.65143e+07	1.14005e+07	1.26001e+07	1.04603e+07	1.48303e+07	1.25404e+07	1.61266e+07	1.23151e+07	1.81731e+07	1.30512e+07	1.48063e+07	1.03615e+07	1.52776e+07	1.2918e+07	1.51602e+07	1.10043e+07	1.47691e+07	1.45428e+07	1.50336e+07	1.40168e+07	9.81988e+06	7.71747e+06
M129T148	Itaconate	129.018	147.8	130.027	7.93686	C5H6O4	[M-H]-	Fatty Acyls	Fatty acids and conjugates	C00490	Carbohydrate metabolism; Global and overview maps	c("97-65-4", "2964-00-3")	HMDB0002092	mzCloud	2	neg	1.26526e+06	645514	692737	1.34507e+06	807554	1.36848e+06	136551	934042	2.15487e+06	2.14106e+06	2.20155e+06	1.21559e+06	1.2131e+06	1.31928e+06	1.07949e+06	161249	1.3046e+06	922559	1.56568e+06	739259	976534	455418	730172	315820
M253T611	5,7-Dihydroxyflavone	253.05	611.4	254.058	1.67556	C15H10O4	[M-H]-	Flavonoids	Flavones	C10028	Biosynthesis of other secondary metabolites	480-40-0	HMDB0036619	MoNA	2	neg	2.95059e+06	2.28355e+06	549048	1.81328e+06	1.6494e+06	519461	591099	962023	663628	2.03487e+06	2.06333e+06	494506	1.97876e+06	554064	2.17457e+06	1.7863e+06	1.12011e+06	3.11494e+06	1.73931e+06	351265	1.84827e+06	1.70817e+06	254975	361373
M201T109	Asymmetric dimethylarginine	201.135	109.3	202.143	1.49062	C8H18N4O2	[M-H]-	Carboxylic acids and derivatives	Amino acids, peptides, and analogues	C03626		30315-93-6/220805-22-1	HMDB0001539	MoNA	2	neg	2.45382e+07	1.14913e+07	4.02869e+07	4.59466e+07	1.5451e+07	4.65058e+06	1.0074e+07	7.28063e+06	4.4364e+07	5.90308e+06	4.41324e+07	5.45468e+06	2.19685e+07	2.0482e+07	1.47586e+07	2.0402e+07	1.88711e+07	5.06194e+06	1.25309e+07	1.18886e+07	1.10487e+07	6.22224e+06	5.99408e+06	1.11734e+07
M119T220	Purine	119.037	219.9	120.044	1.47854	C5H4N4	[M-H]-	Imidazopyrimidines	Purines and purine derivatives	C15587		120-73-0	HMDB0001366	MoNA	2	neg	1.18002e+07	9.91077e+06	3.69753e+06	9.68839e+06	1.2116e+07	9.69605e+06	5.05586e+06	8.14616e+06	1.14128e+07	2.91571e+07	9.54511e+06	5.6342e+06	3.23268e+06	2.16321e+06	1.08652e+07	8.59298e+06	3.52337e+06	7.15853e+06	2.11335e+06	1.4401e+07	6.73041e+06	3.24175e+06	4.59641e+06	8.41376e+06
M144T578	1H-Indole-3-carboxaldehyde	144.046	577.8	145.053	0.527611	C9H7NO	[M-H]-	Indoles and derivatives	Indoles	C08493		487-89-8	HMDB0029737	MoNA	2	neg	6.79448e+06	8.33583e+06	9.67965e+06	4.84898e+06	1.08784e+07	5.16489e+06	1.1951e+07	5.50706e+06	7.79659e+06	7.33859e+06	1.38699e+07	1.61897e+07	1.36228e+07	1.36727e+07	7.44016e+06	1.62711e+07	9.26438e+06	9.38569e+06	1.79444e+07	8.18688e+06	4.05701e+06	9.579e+06	8.69514e+06	1.00555e+07
M277T747	Dibutyl phthalate	277.144	747.4	278.152	1.52989	C16H22O4	[M-H]-	Benzene and substituted derivatives	Benzoic acids and derivatives	C14214		84-74-2	HMDB0033244	MoNA	2	neg	1.24249e+06	2.07119e+06	1.07418e+06	897911	1.45802e+06	1.97613e+06	1.30229e+06	1.92059e+06	3.60018e+06	2.22607e+06	2.40562e+06	2.90153e+06	3.41368e+06	2.36445e+06	2.08641e+06	3.64227e+06	3.67875e+06	4.93856e+06	3.00943e+06	3.5463e+06	3.20006e+06	2.5607e+06	2.26935e+06	2.28761e+06
M151T653	Oxypurinol	151.026	652.9	152.033	1.65952	C5H4N4O2	[M-H]-	Imidazopyrimidines	Purines and purine derivatives	C07599		2465-59-0	HMDB0000786	MoNA	2	neg	699172	1.28497e+06	1.19775e+06	375492	964917	1.45844e+06	1.01182e+06	538501	1.65034e+06	1.67465e+06	1.16583e+06	1.69332e+06	1.80871e+06	1.64974e+06	637252	1.84313e+06	484518	1.98151e+06	547454	1.40177e+06	1.6171e+06	543258	1.81413e+06	505667
M317T799	Bilobol	317.248	799.3	318.256	1.5897	C21H34O2	[M-H]-	Benzene and substituted derivatives	Phenols and derivatives	C10770		22910-86-7	HMDB0030983	MoNA	2	neg	1.44674e+07	9.61808e+06	9.64146e+06	1.08994e+07	1.46205e+07	1.0745e+07	1.22561e+07	7.26981e+06	7.48416e+06	6.71055e+06	1.07125e+07	1.44247e+07	1.56214e+07	1.29798e+07	1.5009e+07	1.31102e+07	1.01577e+07	1.31556e+07	6.13604e+06	1.33958e+07	1.79912e+07	1.32994e+07	1.46984e+07	1.25351e+07
M111T70	2-Furoate	111.009	70.3	112.016	0.68463	C5H4O3	[M-H]-	Furans	Furoic acid and derivatives	C01546	Xenobiotics biodegradation and metabolism; Global and overview maps	88-14-2	HMDB0000617	mzCloud	2	neg	4.19629e+06	4.44938e+06	3.17909e+06	4.60251e+06	4.16662e+06	5.35116e+06	3.35902e+06	3.72206e+06	1.06843e+06	4.15548e+06	3.82374e+06	3.4361e+06	5.56631e+06	6.25192e+06	3.49075e+06	4.37966e+06	3.13892e+06	734252	3.66791e+06	3.70025e+06	3.75218e+06	4.13139e+06	4.47046e+06	3.73323e+06
M330T152	Aflatoxin G2	330.067	152.5	330.074	20.1559	C17H14O7	[M]-	Coumarins and derivatives	Furanocoumarins	C16754	Biosynthesis of other secondary metabolites; Global and overview maps	7241-98-7	HMDB0030475	mzCloud	2	neg	2.26912e+06	5.30177e+06	1.95796e+06	2.72101e+06	838902	1.77303e+06	1.91415e+06	1.55534e+06	269709	2.009e+06	2.30683e+06	367353	234129	13177	1.19251e+06	53324.6	1.34795e+06	38115.8	180507	426562	662129	763784	770614	11708.4
M171T148	DL-Glycerol 1-phosphate	171.008	148.2	172.014	8.63118	C3H9O6P	[M-H]-	Glycerophospholipids	Glycerophosphates	C03189		57-03-4	HMDB0000126	mzCloud	2	neg	372016	340397	596844	474911	1.66981e+06	1.41907e+06	489465	1.64153e+06	1.76285e+06	719176	1.25166e+06	496962	2.77301e+06	1.94825e+06	1.17512e+06	1.20754e+06	411284	1.01376e+06	2.27709e+06	2.55506e+06	1.75479e+06	2.26313e+06	1.60714e+06	1.75649e+06
M179T737	Isopropylparaben	179.071	737.1	180.079	0.424412	C10H12O3	[M-H]-	Extractables/Leachables		C20343		4191-73-5		mzCloud	2	neg	2.16745e+06	1.83917e+06	2.44608e+06	1.51332e+06	2.50505e+06	2.96841e+06	2.51922e+06	3.29186e+06	3.1414e+06	3.87665e+06	3.07593e+06	2.26842e+06	2.6497e+06	3.84365e+06	2.71635e+06	2.77068e+06	3.04404e+06	3.58764e+06	3.24446e+06	1.28203e+06	3.084e+06	3.41289e+06	2.57525e+06	2.50508e+06
M220T98	N-Acetyl-D-galactosamine	220.082	98.3	221.09	1.47218	C8H15NO6	[M-H]-	Endogenous Metabolites		C01132	Carbohydrate metabolism; Membrane transport; Global and overview maps	c("14215-68-0", "1811-31-0")		mzCloud	2	neg	916437	741381	955870	577705	911251	572455	888587	699661	2.7058e+06	2.92526e+06	2.8008e+06	2.26601e+06	2.23477e+06	2.8991e+06	3.1197e+06	3.18261e+06	3.01271e+06	2.30911e+06	2.68353e+06	3.21435e+06	3.34996e+06	2.59227e+06	3.1122e+06	2.57521e+06
M131T355	6-Hydroxyhexanoic acid	131.071	354.6	132.079	0.579837	C6H12O3	[M-H]-	Hydroxy acids and derivatives	Medium-chain hydroxy acids and derivatives	C06103	Xenobiotics biodegradation and metabolism; Global and overview maps	1191-25-9	HMDB0012843	mzCloud	2	neg	2.86797e+06	304113	3.29477e+06	2.22691e+06	2.46684e+06	2.07993e+06	4.04745e+06	3.45386e+06	2.27355e+06	2.72939e+06	578385	2.95538e+06	2.63389e+06	1.76442e+06	2.88937e+06	3.7373e+06	3.62426e+06	2.27333e+06	2.45635e+06	4.49782e+06	3.44759e+06	2.73801e+06	420463	243001
M283T288	Xanthosine	283.068	288	284.076	1.1446	C10H12N4O6	[M-H]-	Purine nucleosides		C01762	Membrane transport; Biosynthesis of other secondary metabolites; Nucleotide metabolism; Chemical structure transformation maps; Global and overview maps	146-80-5	HMDB0000299	mzCloud	2	neg	1.03751e+08	8.34018e+07	6.06915e+07	8.084e+07	7.46297e+07	4.86429e+07	6.63791e+07	7.13985e+07	6.26391e+07	5.5463e+07	7.75329e+07	3.80389e+07	5.87387e+06	5.31688e+06	7.03892e+06	5.31397e+06	4.88673e+06	2.22932e+07	4.67063e+06	7.25732e+06	3.63146e+06	3.99903e+06	1.62638e+06	1.35622e+06
M223T147	3-Hydroxykynurenine	223.074	147.1	224.08	6.16836	C10H12N2O4	[M-H]-	Organooxygen compounds	Carbonyl compounds	C02794		c("2147-61-7", "484-78-6")	HMDB0000732	mzCloud	2	neg	799959	518925	537125	685170	1.32827e+06	1.39162e+06	589153	742973	720263	1.17527e+06	698572	1.00871e+06	900102	2.21708e+06	826509	1.30618e+06	1.34621e+06	1.03683e+06	1.30556e+06	1.02672e+06	1.90636e+06	1.34555e+06	3.24815e+06	1.53474e+06
M133T303	D-Malic acid	133.014	303.5	134.022	0.355616	C4H6O5	[M-H]-	Fatty Acyls	Fatty acids and conjugates	C00497	Carbohydrate metabolism; Global and overview maps	636-61-3	HMDB0031518	mzCloud	2	neg	2.98858e+06	3.67139e+06	3.21199e+06	3.51955e+06	3.30666e+06	789639	2.58308e+06	3.27554e+06	4.31466e+06	4.256e+06	3.66031e+06	3.58631e+06	2.23552e+06	2.02339e+06	2.85138e+06	1.70116e+06	2.12583e+06	3.06897e+06	2.23195e+06	3.32471e+06	2.40904e+06	2.69186e+06	1.25957e+06	906446
M279T320	Sulfamethoxypyridazine	279.057	319.8	280.063	4.53325	C11H12N4O3S	[M-H]-	Therapeutics/Prescription Drugs		D02439				mzCloud	2	neg	2.41722e+06	2.11736e+06	2.0861e+06	2.05834e+06	2.08437e+06	1.9286e+06	2.33649e+06	2.14972e+06	2.15608e+06	3.38858e+06	2.43981e+06	1.98335e+06	2.02596e+06	3.1387e+06	2.89659e+06	3.16866e+06	2.25272e+06	2.9592e+06	2.29187e+06	2.05156e+06	1.9003e+06	2.51814e+06	1.57434e+06	2.05762e+06
M135T521	Toluate	135.046	520.6	136.052	3.52474	C8H8O2	[M-H]-	Benzene and substituted derivatives	Benzoic acids and derivatives	C01454	Xenobiotics biodegradation and metabolism; Global and overview maps	99-94-5	HMDB0029635	mzCloud	2	neg	1.17236e+06	1.25672e+06	1.08575e+06	438617	1.52789e+06	304488	1.90434e+06	1.30741e+06	3.90441e+06	1.82937e+06	1.97258e+06	1.73189e+06	1.96163e+06	1.55083e+06	2.42929e+06	1.71047e+06	3.46566e+06	962616	2.31129e+06	2.16421e+06	4.3276e+06	3.97893e+06	185051	268923
M149T617	Phenylpropanoate	149.061	617.4	150.068	0.831876	C9H10O2	[M-H]-	Phenylpropanoic acids		C05629	Amino acid metabolism; Global and overview maps	501-52-0	HMDB0000764	mzCloud	2	neg	921332	1.21905e+06	968640	1.52188e+06	924023	707562	655029	1.1574e+06	959988	322883	403399	700187	274607	637828	735955	585742	680914	189410	695329	526218	633845	338974	261946	335346
M291T798	13(S)-HPOT	291.199	797.6	310.214	11.6415	C18H30O4	[M-H2O-H]-			C04785	Lipid metabolism; Global and overview maps			mzCloud	2	neg	1.88761e+07	1.07423e+07	1.0943e+07	5.56935e+06	1.16457e+07	5.67729e+06	1.53458e+07	3.89031e+06	1.8968e+06	6.1117e+06	6.0104e+06	1.05305e+07	1.1141e+07	8.17166e+06	1.1162e+07	4.20111e+06	5.71622e+06	9.4765e+06	3.50373e+06	7.52078e+06	8.52865e+06	8.80339e+06	5.04154e+06	1.38428e+07
M166T679	Ethylparaben	166.059	678.8	166.174	24.0528	C9H10O3	[M]-	Benzene and substituted derivatives	Benzoic acids and derivatives	D01647		120-47-8	HMDB0032573	mzCloud	2	neg	2.13405e+06	2.23301e+06	2.53183e+06	3.0765e+06	2.8141e+06	1.38221e+06	3.0804e+06	1.98691e+06	2.12716e+06	3.26711e+06	3.39637e+06	1.93131e+06	4.08447e+06	6.2989e+06	4.19309e+06	5.21395e+06	3.48962e+06	3.23587e+06	3.29583e+06	2.46407e+06	2.6291e+06	3.29163e+06	1.10259e+06	1.40317e+06
M285T763	Hexadecanedioate	285.207	762.6	286.214	1.83726	C16H30O4	[M-H]-	Fatty Acyls	Fatty acids and conjugates	C19615	Lipid metabolism; Global and overview maps	505-54-4	HMDB0000672	mzCloud	2	neg	5.09285e+06	5.52234e+06	2.62484e+07	9.26073e+06	8.42315e+06	5.96854e+06	6.14211e+06	8.79272e+06	9.64994e+06	6.52588e+06	8.19732e+06	1.113e+07	8.04935e+06	8.10526e+06	9.81273e+06	1.06423e+07	9.97378e+06	9.15298e+06	9.97124e+06	6.1454e+06	1.11463e+07	8.48679e+06	6.78809e+06	6.62582e+06
M161T98	Pimelic acid	161.092	97.7	160.074	0.828009	C7H12O4	[M+H]+	Fatty Acyls	Fatty acids and conjugates	C02656	Metabolism of cofactors and vitamins; Global and overview maps	111-16-0	HMDB0000857	BioDeepDB	1	pos	439723	5.13851e+06	979592	358094	3.77833e+06	1.05223e+06	5.67823e+06	4.72763e+06	5.76252e+06	5.36095e+06	4.02866e+06	6.37475e+06	8.46612e+06	1.0517e+07	9.66925e+06	8.28627e+06	8.70798e+06	6.19325e+06	7.74362e+06	8.61115e+06	7.45299e+06	7.4478e+06	1.0661e+06	1.00017e+07
M123T33	Nicotinic acid	123.044	33.4	123.032	0.0449415	C6H5NO2	[M]+	Pyridines and derivatives	Pyridinecarboxylic acids and derivatives	C00253	Metabolism of cofactors and vitamins; Biosynthesis of other secondary metabolites; Infectious disease: bacterial; Chemical structure transformation maps; Global and overview maps	59-67-6	HMDB0001488	BioDeepDB	1	pos	361692	721868	623505	171711	350788	552307	633976	624150	266862	509629	205412	401076	669182	319333	469625	767315	619531	415929	382616	644479	205292	200053	557653	361611
M166T137	6-Methylmercaptopurine	165.998	136.5	166.031	6.87765	C6H6N4S	[M]+	Imidazopyrimidines	Purines and purine derivatives	C16614	Xenobiotics biodegradation and metabolism	50-66-8	HMDB0060412	BioDeepDB	1	pos	57742.6	51817.1	308858	319656	252236	24346.7	47327.2	64512.9	103521	505505	273459	365586	1.77499e+06	2.9663e+06	1.1264e+06	1.94356e+06	1.30382e+06	2.51927e+06	2.85611e+06	2.75733e+06	2.87316e+06	2.35321e+06	1.98412e+06	3.14914e+06
M183T400	Mannitol	183.021	399.5	182.079	0.679381	C6H14O6	[M+H]+	Organooxygen compounds	Carbohydrates and carbohydrate conjugates	C00392	Carbohydrate metabolism; Membrane transport; Global and overview maps	69-65-8	HMDB0000765	BioDeepDB	1	pos	1.38347e+06	1.22352e+06	1.60794e+06	2.14192e+06	2.34106e+06	2.2625e+06	2.21228e+06	2.30523e+06	2.84894e+06	3.36672e+06	1.57911e+06	1.49368e+06	1.40962e+06	2.03752e+06	3.50934e+06	2.45024e+06	2.66026e+06	1.55457e+06	1.473e+06	1.82414e+06	2.02771e+06	2.83073e+06	2.68377e+06	1.14533e+06
M149T65	L-2-Hydroxyglutaric acid	148.977	64.5	148.037	0.238443	C5H8O5	[M+H]+	Fatty Acyls	Fatty acids and conjugates	C03196	Amino acid metabolism; Global and overview maps	13095-48-2	HMDB0000694	BioDeepDB	1	pos	4.78782e+06	2.64414e+06	4.3262e+06	3.24831e+06	4.0775e+06	2.99258e+06	5.10221e+06	5.57411e+06	4.27426e+06	2.13404e+06	3.71615e+06	4.16708e+06	5.42874e+06	477143	601343	1.12006e+07	9.54376e+06	2.43093e+06	6.7852e+06	6.13153e+06	1.39544e+06	8.33283e+06	1.74145e+06	2.1533e+06
M139T65	Salicylic acid	139.112	64.8	138.032	1.13759	C7H6O3	[M+H]+	Benzene and substituted derivatives	Benzoic acids and derivatives	C00805	Signal transduction; Digestive system; Xenobiotics biodegradation and metabolism; Metabolism of terpenoids and polyketides; Amino acid metabolism; Chemical structure transformation maps; Global and overview maps	69-72-7	HMDB0001895	BioDeepDB	1	pos	1.2981e+06	3.03045e+06	1.29452e+06	2.98778e+06	5.27665e+06	3.00944e+06	5.25531e+06	3.43713e+06	4.29084e+06	1.45042e+06	1.32105e+06	3.20077e+06	4.49663e+06	4.42552e+06	4.01844e+06	3.03334e+06	1.52258e+06	2.86096e+06	3.05838e+06	2.9246e+06	2.83844e+06	3.48537e+06	3.88082e+06	1.52182e+06
M175T744	1H-Indole-3-acetamide	175.148	744.2	174.079	0.000975733	C10H10N2O	[M+H]+	Indoles and derivatives	Indoles	C02693	Amino acid metabolism; Global and overview maps	879-37-8	HMDB0029739	BioDeepDB	1	pos	2.2362e+07	2.51331e+07	2.23208e+07	2.8092e+07	2.42943e+07	2.56039e+07	3.01469e+07	2.07808e+07	2.15072e+07	3.06809e+07	1.09947e+07	2.37217e+07	2.22461e+07	3.56069e+07	4.22653e+07	3.34533e+07	3.90384e+07	1.69155e+07	3.38125e+07	3.14e+07	1.53073e+07	4.19436e+07	3.0996e+07	3.44435e+07
M187T65	L-Cysteic acid monohydrate	187.126	65.1	187.015	0.237322	C3H9NO6S	[M]+					23537-25-9		BioDeepDB	1	pos	3.04194e+06	3.1002e+06	3.20881e+06	3.01032e+06	3.03764e+06	2.73357e+06	3.32538e+06	3.54145e+06	3.87349e+06	3.41094e+06	3.43677e+06	3.6086e+06	4.16911e+06	3.66069e+06	3.80744e+06	3.96973e+06	3.60825e+06	4.67345e+06	3.39339e+06	3.30327e+06	3.18222e+06	3.10095e+06	3.03985e+06	3.14498e+06
M181T69	myo-Inositol	180.99	68.9	180.063	0.457419	C6H12O6	[M+H]+	Organooxygen compounds	Alcohols and polyols	C00137	Membrane transport; Signal transduction; Carbohydrate metabolism; Biosynthesis of other secondary metabolites; Global and overview maps	87-89-8 / 87-9-8	HMDB0000211	BioDeepDB	1	pos	1.49161e+06	1.40475e+06	1.58711e+06	1.08075e+06	1.31883e+06	1.06962e+06	1.74517e+06	1.18726e+06	1.13031e+06	1.63283e+06	1.34671e+06	1.06729e+06	1.54695e+06	1.03092e+06	1.50139e+06	1.5878e+06	1.48629e+06	1.71238e+06	1.60084e+06	1.16558e+06	1.31951e+06	1.1146e+06	853614	173954
M235T102	2-Propenoic acid, 2-(phosphonooxy)-, trisodium salt	234.957	102	233.928	0.047902	C3H2Na3O6P	[M+H]+					5541-93-5		BioDeepDB	1	pos	3.70703e+06	2.75393e+06	3.78065e+06	3.91314e+06	2.69148e+06	2.61188e+06	3.84178e+06	3.01151e+06	4.22846e+06	3.36665e+06	4.47145e+06	3.84603e+06	3.80202e+06	2.88103e+06	4.55148e+06	4.30801e+06	5.27276e+06	5.14655e+06	1.14474e+06	4.91495e+06	3.64193e+06	3.55434e+06	2.78845e+06	4.11857e+06
M229T744_1	Myristic acid	229.179	744.2	228.209	0.912946	C14H28O2	[M+H]+	Fatty Acyls	Fatty acids and conjugates	C06424	Lipid metabolism; Global and overview maps	544-63-8	HMDB0000806	BioDeepDB	1	pos	9.20596e+06	6.95837e+06	8.0685e+06	7.38291e+06	9.32755e+06	4.54318e+06	5.78327e+06	6.95864e+06	5.68481e+06	1.25581e+07	7.69539e+06	8.86582e+06	4.33384e+06	1.04297e+07	1.43167e+07	1.05781e+07	9.31381e+06	6.51709e+06	8.49627e+06	9.2815e+06	8.52837e+06	8.07626e+06	1.0727e+07	8.5009e+06
M185T72	Lithium potassium acetyl phosphate	184.961	71.6	183.952	7.69893	C2H3KLiO5P	[M+H]+					94249-01-1		BioDeepDB	1	pos	2.79536e+06	1.2342e+06	3.0427e+06	2.48176e+06	2.84577e+06	3.38489e+06	1.01068e+06	1.37227e+06	3.92993e+06	3.65377e+06	2.78779e+06	1.24138e+06	2.2339e+06	1.50828e+06	1.00943e+06	1.00938e+06	2.02693e+06	1.27755e+06	4.29641e+06	3.54994e+06	1.08884e+06	2.46168e+06	1.64555e+06	2.79469e+06
M255T241	Phosphocreatine disodium salt	254.998	240.5	255	6.27455	C4H8N3Na2O5P	[M]+					19333-65-4		BioDeepDB	1	pos	1.72874e+06	1.26149e+06	1.8989e+06	2.4643e+06	2.20135e+06	1.82968e+06	5.48023e+06	1.73902e+06	1.86987e+06	2.23927e+06	2.11676e+06	2.32402e+06	2.0495e+06	2.45515e+06	1.91876e+06	1.78226e+06	2.37814e+06	1.86189e+06	1.91786e+06	2.8754e+06	2.32155e+06	2.34046e+06	1.58827e+06	1.77533e+06
M267T72_1	2'-Deoxyguanosine	266.944	71.6	267.097	24.4348	C10H13N5O4	[M]+			C00330	Membrane transport; Global and overview maps; Nucleotide metabolism	312693-72-4	HMDB0000085	BioDeepDB	1	pos	1.09942e+06	3.20504e+06	1.03273e+06	1.64146e+06	1.30136e+06	1.14584e+06	162101	811715	1.84467e+06	1.50023e+06	918282	1.08313e+06	154761	226656	1.13162e+06	3.08695e+06	850944	238717	630976	813051	780928	784870	947107	1.03813e+06
M377T72	Pentasodium (2R)-2,3-diphosphonatooxypropanoate	376.88	71.6	375.869	9.6158	C3H3Na5O10P2	[M+H]+					102783-53-9		BioDeepDB	1	pos	425136	465174	527429	300912	544401	416456	711341	475544	615814	574729	703608	514287	564874	446672	577495	539330	508549	469009	477106	533124	536518	540750	520141	558215
M241T72_1	L-Cystine	240.931	71.7	240.024	6.71427	C6H12N2O4S2	[M+H]+	Carboxylic acids and derivatives	Amino acids, peptides, and analogues	C00491	Membrane transport; Cell growth and death; Digestive system; Amino acid metabolism; Global and overview maps	56-89-3	HMDB0000192	BioDeepDB	1	pos	3.2396e+06	3.91376e+06	1.43403e+06	924209	1.55481e+06	580846	303784	1.33117e+06	2.94119e+06	3.63012e+06	777737	1.971e+06	5.20694e+06	1.52165e+06	370234	4.88659e+06	393747	2.4803e+06	2.05174e+06	1.36886e+06	258722	1.35496e+06	881190	842071
M105T72	Diethanolamine	105.003	71.8	105.079	2.35867	C4H11NO2	[M]+	Organonitrogen compounds	Amines	C06772	Lipid metabolism	111-42-2	HMDB0004437	BioDeepDB	1	pos	3.58343e+06	2.70033e+06	2.8868e+06	3.39504e+06	3.1345e+06	3.15699e+06	4.17949e+06	3.09021e+06	3.17589e+06	4.59304e+06	3.05431e+06	3.16345e+06	3.45786e+06	3.83217e+06	3.48473e+06	4.00068e+06	3.81554e+06	3.51171e+06	4.12371e+06	4.79307e+06	4.52675e+06	4.60867e+06	3.95251e+06	4.00106e+06
M142T72_1	5-Hydroxymethyluracil	142.035	71.8	142.038	19.7135	C5H6N2O3	[M]+	Diazines	Pyrimidines and pyrimidine derivatives	C03088		4433-40-3	HMDB0000469	BioDeepDB	1	pos	1.05456e+07	9.14938e+06	1.04939e+07	1.05134e+07	1.02538e+07	1.02098e+07	1.04164e+07	9.51487e+06	9.96776e+06	1.49616e+07	1.11743e+07	9.32548e+06	9.83708e+06	1.03615e+07	9.14773e+06	9.83488e+06	8.90107e+06	1.00461e+07	9.80051e+06	9.89904e+06	9.86485e+06	9.4402e+06	1.09174e+07	1.31849e+07
M171T72	1-Hydroxy-2-naphthoate	171.043	71.8	188.047	18.9075	C11H8O3	[M+H-H2O]+			C03203	Xenobiotics biodegradation and metabolism; Global and overview maps	86-48-6		BioDeepDB	1	pos	3.75886e+06	3.22096e+06	4.313e+06	2.85546e+06	2.9394e+06	1.9709e+06	949658	3.37131e+06	3.02221e+06	3.81922e+06	4.4972e+06	3.05882e+06	4.70471e+06	3.92767e+06	4.11943e+06	5.21091e+06	2.90928e+06	4.75905e+06	4.27732e+06	3.12436e+06	4.06444e+06	2.6644e+06	2.92366e+06	2.70503e+06
M174T72	2-Aminobenzenesulfonate	174.025	71.8	173.015	16.2276	C6H7NO3S	[M+H]+			C06333	Xenobiotics biodegradation and metabolism; Global and overview maps	88-21-1		BioDeepDB	1	pos	2.68037e+06	2.54198e+06	2.24302e+06	1.98042e+06	3.74024e+06	2.38946e+06	3.31432e+06	2.0773e+06	3.21371e+06	4.34547e+06	3.09352e+06	2.70811e+06	3.45499e+06	2.26821e+06	2.87488e+06	3.83228e+06	3.24515e+06	3.35306e+06	3.07332e+06	2.72692e+06	1.28185e+06	2.35468e+06	1.65633e+06	2.06639e+06
M234T72	Potassium 1H-indol-3-yl sulfate	233.957	71.8	250.965	3.70154	C8H6KNO4S	[M+H-H2O]+					2642-37-7		BioDeepDB	1	pos	1.1866e+07	4.26329e+06	9.39221e+06	1.78955e+06	9.12794e+06	2.30633e+06	8.24935e+06	1.20992e+07	1.90585e+06	6.48425e+06	2.54873e+06	2.86737e+06	1.34473e+07	9.57968e+06	5.87759e+06	6.831e+06	2.43531e+06	6.0286e+06	9.1977e+06	7.28114e+06	2.81806e+06	9.98444e+06	2.62709e+06	2.92707e+06
M356T72_1	Tricosanoic acid	355.911	71.8	354.61	10.3165	C23H46O2	[M+H]+	Fatty Acyls	Fatty acids and conjugates			2433-96-7	HMDB0001160	BioDeepDB	1	pos	5.77873e+06	7.08551e+06	7.73088e+06	5.88866e+06	5.07281e+06	4.90868e+06	8.56247e+06	5.93952e+06	4.78059e+06	9.37162e+06	2.12427e+06	4.21103e+06	6.73093e+06	5.23635e+06	6.0019e+06	7.02572e+06	6.24378e+06	9.07801e+06	7.58213e+06	5.90061e+06	5.48278e+06	5.63431e+06	5.18565e+06	2.16062e+06
M131T800	(R)-Pantolactone	130.522	799.9	130.063	0.592924	C6H10O3	[M+H]+			C01012		599-04-2		BioDeepDB	1	pos	1.51071e+07	2.56112e+07	2.91959e+07	3.14963e+07	1.40608e+07	2.67924e+07	1.61156e+07	1.94848e+07	8.1588e+06	1.65863e+07	2.16511e+07	1.78666e+07	1.76717e+07	1.26363e+07	2.31169e+07	1.71689e+07	2.29297e+07	4.35803e+07	2.48013e+07	2.76258e+07	1.93643e+07	1.72872e+07	1.23424e+07	2.38862e+07
M102T72_2	Valeric acid	102.034	72	102.068	1.6943	C5H10O2	[M]+	Fatty Acyls	Fatty acids and conjugates	C00803		109-52-4	HMDB0000892	BioDeepDB	1	pos	6.99457e+06	1.0872e+07	6.0609e+06	7.95399e+06	7.87655e+06	5.91015e+06	1.2903e+07	8.42588e+06	1.22137e+07	9.08248e+06	6.94073e+06	1.05856e+07	7.93676e+06	8.18254e+06	1.01674e+07	6.57517e+06	8.99113e+06	6.98865e+06	7.38136e+06	1.01468e+07	8.55031e+06	8.51509e+06	6.49176e+06	1.05577e+07
M113T776	Heptanoic acid	113.06	775.8	130.099	0.000107969	C7H14O2	[M+H-H2O]+	Fatty Acyls	Fatty acids and conjugates	C17714		111-14-8	HMDB0000666	BioDeepDB	1	pos	4.25922e+06	3.57716e+06	7.36018e+06	5.75162e+06	7.02137e+06	3.63682e+06	4.35115e+06	5.75191e+06	4.02298e+06	8.65314e+06	3.56327e+06	4.0441e+06	5.63105e+06	7.33517e+06	1.12116e+07	5.74904e+06	1.00739e+07	5.73242e+06	9.17713e+06	5.56284e+06	5.41272e+06	5.66659e+06	5.52158e+06	5.293e+06
M449T431	(2R,3S,4S,5R,6R)-2-({[(2R,3R,4R,5S)-3,4-dihydroxy-5-(hydroxymethyl)oxolan-2-yl]oxy}methyl)-6-{[(2E)-3,7-dimethylocta-2,6-dien-1-yl]oxy}oxane-3,4,5-triol	449.234	430.6	448.231	9.40129	C21H36O10	[M+H]+	Endogenous Metabolites; Natural Products/Medicines						mzCloud	1	pos	162571	149485	115480	92805.9	62575.7	71498.7	95717.9	70648	147316	149545	58025.1	69628.5	156747	103328	147241	64542	153440	276941	226342	53836	135231	59707.3	209351	74453.8
M147T76_1	2,6-Dihydroxypyridine hydrochloride	147.008	76	147.009	8.84307	C5H6ClNO2	[M]+					10357-84-3		BioDeepDB	1	pos	291621	219748	282109	276941	217670	265048	221837	211585	244139	281462	248958	277252	296361	212539	266497	310146	190491	218404	204494	197340	201394	181800	177971	301024
M459T457	Epigallocatechin gallate	459.092	457	458.085	0.270098	C22H18O11	[M+H]+	Flavonoids	Flavans	C09731	Signal transduction	989-51-5	HMDB0003153	BioDeepDB	1	pos	90851	239903	197188	129622	240282	19852.5	135166	309414	121803	392818	146983	379113	86385.6	39694.4	348524	37214	104233	23430.2	21972.5	139590	130515	253934	425049	687032
M170T101	L-Noradrenaline	170.081	100.8	169.074	0.729063	C8H11NO3	[M+H]+	Phenols	Benzenediols	C00547	Circulatory system; Nervous system; Signal transduction; Sensory system; Endocrine system; Digestive system; Environmental adaptation; Signaling molecules and interaction; Amino acid metabolism; Cellular community - eukaryotes; Cellular community - prokaryotes; Global and overview maps	51-41-2	HMDB0000216	mzCloud	1	pos	1.42739e+06	454124	1.49268e+06	1.55304e+06	1.6544e+06	1.13758e+06	1.56319e+06	1.63048e+06	2.54565e+06	2.62057e+06	2.17834e+06	2.34991e+06	1.87483e+06	1.77909e+06	1.89209e+06	1.87e+06	1.92135e+06	2.18849e+06	1.84265e+06	2.0529e+06	1.98152e+06	2.02206e+06	1.78012e+06	2.28076e+06
M305T78	Sodium (2R,3R,4S)-2,3,4,6-tetrahydroxy-5-oxohexyl phosphate	304.893	77.8	303.994	0.738444	C6H11Na2O9P	[M+H]+					26177-86-6		BioDeepDB	1	pos	1.15006e+06	1.40929e+06	1.40722e+06	1.40219e+06	1.46251e+06	1.6172e+06	1.32141e+06	1.51042e+06	1.66743e+06	1.41404e+06	1.43184e+06	1.69917e+06	1.57273e+06	1.54956e+06	2.38988e+06	1.46931e+06	1.48603e+06	1.25451e+06	1.4064e+06	1.32198e+06	1.56263e+06	1.39871e+06	1.45287e+06	1.49815e+06
M152T387	p-Hydroxyphenylacetic acid	152.071	386.7	152.047	0.943846	C8H8O3	[M]+	Phenols	1-hydroxy-2-unsubstituted benzenoids	C00642	Amino acid metabolism; Global and overview maps	156-38-7	HMDB0000020	BioDeepDB	1	pos	878135	765866	941607	911612	994153	1.46035e+06	621549	560034	738960	636216	519077	696423	1.05568e+06	419174	747491	1.09602e+06	649459	928558	623629	631259	575896	510080	739691	665473
M329T78	Cyclic AMP	329.009	78	329.053	10.9213	C10H12N5O6P	[M]+	Purine nucleotides	Cyclic purine nucleotides	C00575	Neurodegenerative disease; Substance dependence; Cellular community - eukaryotes; Immune system; Excretory system; Development and regeneration; Cancer: overview; Drug resistance: antineoplastic; Signal transduction; Cell growth and death; Nervous system; Digestive system; Environmental adaptation; Infectious disease: bacterial; Aging; Infectious disease: parasitic; Infectious disease: viral; Cir…	60-92-4	HMDB0000058	BioDeepDB	1	pos	558082	686543	492819	697311	343807	638814	329395	375194	514735	682417	421251	539967	1.25126e+06	1.09376e+06	1.11566e+06	1.07424e+06	901858	995103	900977	819036	739563	733036	598365	843614
M343T763	Cortisone	343.188	762.9	360.194	4.46986	C21H28O5	[M+H-H2O]+	Steroids and steroid derivatives	Hydroxysteroids	C00762	Cancer: overview; Excretory system; Lipid metabolism; Cancer: specific types; Target-based classification: Nuclear receptors; Global and overview maps	53-06-5	HMDB0002802	BioDeepDB	1	pos	5.69722e+06	5.47799e+06	2.95285e+06	7.57101e+06	6.63023e+06	3.28196e+06	3.31606e+06	2.4797e+06	3.83276e+06	1.03079e+07	7.23167e+06	9.40781e+06	2.353e+06	4.47778e+06	3.63996e+06	9.43793e+06	4.38902e+06	5.78028e+06	1.12067e+07	8.78964e+06	9.49188e+06	5.39599e+06	1.02925e+07	7.97101e+06
M567T79_1	1,2-dicapryl-sn-glycero-3-phosphocholine	566.883	79.3	565.72	11.4257	C28H56NO8P	[M+H]+	Carboxylic acids and derivatives	Carboxylic acid derivatives			3436-44-0 /		BioDeepDB	1	pos	6.21794e+06	5.94395e+06	6.83001e+06	4.82004e+06	6.76994e+06	5.55551e+06	8.19257e+06	6.34884e+06	1.71607e+06	4.02534e+06	6.17955e+06	4.87854e+06	7.73576e+06	4.74669e+06	4.75579e+06	4.999e+06	6.23495e+06	5.94482e+06	6.30411e+06	4.19492e+06	5.55298e+06	6.55758e+06	6.00004e+06	7.94258e+06
M295T80	Indican	294.938	79.6	295.106	4.21368	C14H17NO6	[M]+			C08481		487-60-5		BioDeepDB	1	pos	2.75212e+07	2.8339e+07	2.88604e+07	1.28795e+07	2.91935e+07	1.25689e+07	2.94442e+07	1.28494e+07	2.4409e+07	2.07166e+07	1.42251e+07	2.59771e+07	1.27116e+07	1.85131e+07	2.83186e+06	1.37135e+07	2.63727e+07	2.90623e+07	2.1356e+07	2.0797e+07	1.91135e+07	1.15151e+07	1.38439e+07	2.53297e+07
M363T109	Thyrotropin releasing hormone	363	109.2	362.17	2.42903	C16H22N6O4	[M+H]+	Carboxylic acids and derivatives	Amino acids, peptides, and analogues	C03958		24305-27-9	HMDB0060080	BioDeepDB	1	pos	107594	420250	402333	139622	389379	371499	644498	622481	399773	358653	370548	369352	317756	368642	969892	340446	402474	321998	401513	424792	379331	370219	837267	858476
M379T80_1	Trehalose dihydrate	378.897	79.9	378.137	6.34899	C12H26O13	[M+H]+					6138-23-4		BioDeepDB	1	pos	2.76385e+07	7.67574e+07	1.08682e+08	3.48126e+07	1.82662e+08	4.28691e+07	1.03563e+08	1.05856e+08	6.90319e+07	8.67202e+07	5.91828e+07	9.63682e+07	8.61614e+07	2.31097e+08	6.10688e+07	1.32942e+08	1.31467e+08	1.08394e+08	8.26476e+07	1.15544e+08	2.38788e+07	3.20045e+07	1.29748e+08	1.08649e+08
M379T80_2	Barium(2+);[(2R,3R,4S,5S)-2,3,4,5-tetrahydroxy-6-oxohexyl] phosphate	378.913	79.9	395.919	2.46495	C6H11BaO9P	[M+H-H2O]+					104872-94-8		BioDeepDB	1	pos	1.693e+06	2.17776e+06	8.86159e+06	1.7916e+06	2.17795e+06	2.29823e+06	1.90159e+06	6.00622e+06	9.21788e+06	6.46717e+06	6.88356e+06	2.40782e+06	5.60242e+06	5.08925e+06	5.59158e+06	2.76328e+06	5.66275e+06	5.01369e+06	6.02572e+06	7.3643e+06	6.58903e+06	5.91951e+06	4.07037e+06	7.60102e+06
M559T80	Adenosine 5'-diphosphoribose sodium salt	559.088	80.4	559.32	12.0018	C15H23N5O14P2	[M]+					68414-18-6		BioDeepDB	1	pos	2.41817e+07	1.45167e+07	1.85801e+07	5.82928e+06	2.57503e+07	1.51956e+07	2.27002e+07	1.84618e+07	2.78977e+07	5.0234e+07	2.78631e+07	2.15458e+07	2.115e+07	2.19263e+07	2.21306e+07	2.18045e+07	1.7321e+07	2.84366e+07	2.29255e+07	1.88153e+07	1.5956e+07	1.60009e+07	3.2519e+07	4.47991e+07
M124T81	2-(Aminomethyl)phenol	123.928	80.9	123.068	9.74491	C7H9NO	[M+H]+					932-30-9		BioDeepDB	1	pos	1.5635e+06	5.34543e+06	3.07811e+06	2.33421e+06	2.60399e+06	1.87793e+06	3.95029e+06	2.61304e+06	2.75423e+06	4.78215e+06	3.63551e+06	3.66358e+06	3.02619e+06	2.84079e+06	3.81727e+06	3.50487e+06	3.1338e+06	3.77065e+06	3.3364e+06	3.63408e+06	3.02823e+06	2.86526e+06	2.76605e+06	4.73824e+06
M183T82	Histamine dihydrochloride	182.902	81.9	183.033	5.00342	C5H11Cl2N3	[M]+					56-92-8		BioDeepDB	1	pos	2.74551e+06	3.5831e+06	2.8002e+06	3.32114e+06	2.56959e+06	2.41396e+06	2.91587e+06	2.13279e+06	6.5391e+06	6.77268e+06	7.23873e+06	6.08568e+06	5.45508e+06	5.84603e+06	7.02052e+06	8.12431e+06	9.75551e+06	8.43123e+06	8.58167e+06	1.0394e+07	8.72832e+06	8.47816e+06	7.91798e+06	7.29427e+06
M198T372	L-Dopa	198.076	372.5	197.069	1.63573	C9H11NO4	[M+H]+	Carboxylic acids and derivatives	Amino acids, peptides, and analogues	C00355	Nervous system; Endocrine system; Neurodegenerative disease; Biosynthesis of other secondary metabolites; Amino acid metabolism; Substance dependence; Chemical structure transformation maps; Global and overview maps	59-92-7	HMDB0000181	mzCloud	1	pos	2.59109e+06	2.98188e+06	1.46281e+06	3.16433e+06	2.36782e+06	2.7109e+06	2.67633e+06	5.03012e+06	3.02558e+06	1.45688e+06	4.99608e+06	5.13419e+06	4.29655e+06	4.5176e+06	2.00101e+06	3.82799e+06	3.53993e+06	3.2082e+06	4.01748e+06	4.6645e+06	5.00571e+06	2.50694e+06	6.8225e+06	847602
M158T83	cadaverine dihydrochloride	158.093	83.3	175.1	0.215064	C5H16Cl2N2	[M+H-H2O]+	Organonitrogen compounds	Amines			1476-39-7 /		BioDeepDB	1	pos	4.80436e+06	3.897e+06	6.5668e+06	5.72906e+06	5.33161e+06	4.55001e+06	7.86505e+06	6.21535e+06	1.81851e+06	564804	2.19456e+06	1.64292e+06	1.80914e+06	406186	1.74046e+06	392023	560064	1.55706e+06	1.88968e+06	1.83603e+06	2.11406e+06	1.70755e+06	463512	2.42017e+06
M186T83_1	Disodium carbamoyl phosphate	185.96	83.4	184.947	29.1676	CH2NNa2O5P	[M+H]+					72461-86-0		BioDeepDB	1	pos	2.00132e+07	3.93743e+07	3.7706e+07	4.02438e+07	5.80039e+07	4.60233e+07	4.03067e+07	4.38497e+07	4.53324e+07	5.37698e+07	4.01866e+07	3.76626e+07	6.26647e+07	3.94207e+07	4.25224e+07	4.03311e+07	4.34945e+07	4.92921e+07	4.07272e+07	5.24691e+07	4.69532e+07	3.56878e+07	4.50925e+07	4.34824e+07
M171T84	L-Cysteinesulfinic acid monohydrate	171.017	83.5	171.02	18.7116	C3H9NO5S	[M]+					207121-48-0		BioDeepDB	1	pos	1.37318e+06	7.30197e+06	1.01742e+07	2.77407e+07	6.29371e+06	1.51233e+06	1.44e+07	1.00541e+07	8.04839e+06	9.20786e+06	1.5724e+06	1.83429e+06	7.85887e+06	6.34072e+06	1.01502e+07	9.3194e+06	9.24162e+06	9.18249e+06	1.02751e+07	1.02941e+07	6.89038e+06	6.23531e+06	2.34199e+06	2.31464e+06
M105T86	Alpha-Hydroxyisobutyric acid	105.11	85.6	104.105	14.0424	C4H8O3	[M+H]+	Organooxygen compounds	Alcohols and polyols			594-61-6	HMDB0000729	BioDeepDB	1	pos	6.33069e+06	2.17484e+07	4.94949e+07	6.00318e+07	1.19159e+07	3.02419e+06	2.84288e+07	1.0194e+08	2.35948e+08	9.02691e+07	1.35777e+08	2.03362e+08	8.50197e+07	1.52292e+07	1.61086e+08	4.32785e+06	1.8135e+07	2.4207e+07	5.97197e+07	1.64697e+08	1.89221e+07	7.02334e+07	3.80097e+06	6.49575e+06
M369T88	Sodium;(4aR,6R,7R,7aS)-6-(6-aminopurin-9-yl)-2-oxido-2-oxo-4a,6,7,7a-tetrahydro-4H-furo[3,2-d][1,3,2]dioxaphosphinin-7-ol;hydrate	369.044	87.9	369.045	2.43873	C10H13N5NaO7P	[M]+					37839-81-9		BioDeepDB	1	pos	4.47501e+06	4.55416e+06	744503	570370	2.62291e+06	1.38707e+06	8.35832e+06	6.11031e+06	485840	723010	5.04328e+06	3.57196e+06	1.4391e+06	3.10316e+06	5.12792e+06	1.31535e+06	5.5747e+06	6.6653e+06	5.40291e+06	5.68457e+06	5.63745e+06	6.25421e+06	824011	787779
M251T811	5'-Deoxyadenosine	251.122	810.7	251.102	0.545421	C10H13N5O3	[M]+	5'-deoxyribonucleosides		C05198		4754-39-6	HMDB0001983	BioDeepDB	1	pos	7.67692e+06	4.92154e+06	6.35772e+06	8.03052e+06	3.33208e+06	2.87316e+06	7.7041e+06	4.1909e+06	5.13654e+06	6.54059e+06	4.08039e+06	3.70079e+06	4.87476e+06	5.40591e+06	4.46761e+06	5.99459e+06	7.01637e+06	1.00376e+07	5.29879e+06	2.54453e+06	5.38364e+06	2.88464e+06	5.75944e+06	7.14183e+06
M425T89	Thiamine pyrophosphate	425.042	89.2	425.045	6.82285	C12H19N4O7P2S	[M]+	Diazines	Pyrimidines and pyrimidine derivatives	C00068	Metabolism of cofactors and vitamins; Digestive system; Carbohydrate metabolism; Amino acid metabolism; Global and overview maps	154-87-0	HMDB0001372	BioDeepDB	1	pos	1.13634e+06	2.17897e+06	1.86512e+06	921536	1.93817e+06	1.90267e+06	2.00237e+06	2.08589e+06	1.65698e+06	2.69633e+06	2.56821e+06	2.16396e+06	1.85952e+06	1.38067e+06	2.04076e+06	2.02988e+06	1.60956e+06	1.42524e+06	2.31231e+06	1.62356e+06	1.18735e+06	1.45227e+06	1.18245e+06	873287
M310T89_2	Sodium creatine phosphate dibasic tetrahydrate	310.132	89.3	327.14	2.79236	C4H10N3O5P	[M+H-H2O]+					71519-72-7		BioDeepDB	1	pos	1.15006e+07	1.88025e+07	1.64379e+07	1.77727e+07	5.18097e+06	5.1578e+06	3.58166e+06	3.42299e+07	1.19586e+07	1.05129e+07	3.69076e+06	4.54774e+06	2.06044e+07	4.88403e+06	1.76784e+07	1.59399e+07	2.42716e+07	2.8198e+07	1.97792e+07	1.59034e+07	1.82106e+06	1.64824e+07	1.88612e+07	4.61507e+06
M102T89	Cadaverine	102.091	89.5	102.116	0.823476	C5H14N2	[M]+	Organonitrogen compounds	Amines	C01672	Metabolism of other amino acids; Digestive system; Biosynthesis of other secondary metabolites; Amino acid metabolism; Chemical structure transformation maps; Global and overview maps	462-94-2	HMDB0002322	BioDeepDB	1	pos	3.9296e+06	3.42342e+06	3.85139e+06	3.35441e+06	3.24606e+06	3.33966e+06	3.87129e+06	3.72594e+06	3.264e+06	3.01669e+06	3.28273e+06	3.54395e+06	3.24359e+06	2.90048e+06	3.14156e+06	3.62426e+06	3.50173e+06	3.4951e+06	3.38878e+06	3.68223e+06	3.48112e+06	2.93758e+06	3.22764e+06	3.44202e+06
M165T98	L-Fucose	165.113	97.7	164.069	0.872519	C6H12O5	[M+H]+	Organooxygen compounds	Carbohydrates and carbohydrate conjugates	C00507	Carbohydrate metabolism; Global and overview maps	2438-80-4 / 3615-41-6 73-34-7 / 3615-41-6	HMDB0000174	BioDeepDB	1	pos	2.17396e+06	1.08572e+06	784419	4.23203e+06	608214	400067	923222	2.10538e+06	2.00142e+06	1.21437e+06	3.49932e+06	1.20774e+06	885116	1.21995e+06	398955	251848	552772	388139	490821	515781	1.18477e+06	696307	429744	440928
M196T97	2-Amino-2-deoxy-D-gluconate	196.009	97.2	195.074	4.25122	C6H13NO6	[M+H]+			C03752	Carbohydrate metabolism; Membrane transport; Global and overview maps	3646-68-2		BioDeepDB	1	pos	5.0016e+06	5.08264e+06	4.57202e+06	6.4835e+06	4.49072e+06	3.17351e+06	5.00376e+06	3.7887e+06	4.81615e+06	4.48468e+06	4.36748e+06	3.35448e+06	2.17531e+06	3.55229e+06	4.56313e+06	4.77315e+06	4.12487e+06	4.97222e+06	4.63836e+06	4.21877e+06	3.85027e+06	4.12152e+06	2.02212e+06	2.37529e+06
M153T90	D-Arabitol	153.076	90.1	152.069	0.0183847	C5H12O5	[M+H]+	Organooxygen compounds	Carbohydrates and carbohydrate conjugates	C01904	Carbohydrate metabolism; Global and overview maps	488-82-4	HMDB0000568	BioDeepDB	1	pos	3.05473e+06	7.63632e+06	6.68413e+06	4.89138e+06	6.30535e+06	4.55806e+06	1.24184e+07	6.80555e+06	3.66481e+06	2.44968e+06	2.85711e+06	1.92674e+06	1.72632e+06	1.68413e+06	2.73778e+06	2.90856e+06	2.74834e+06	2.57516e+06	3.48813e+06	4.69144e+06	2.77024e+06	2.02775e+06	1.23202e+06	1.23882e+06
M230T745_2	D-Ribose 5-phosphate	230.248	744.5	230.019	0.181106	C5H11O8P	[M]+	Organooxygen compounds	Carbohydrates and carbohydrate conjugates	C00117	Metabolism of cofactors and vitamins; Metabolism of other amino acids; Endocrine system; Carbohydrate metabolism; Nucleotide metabolism; Energy metabolism; Global and overview maps	3615-55-2 / 4300-28-1 / 4151-19-3 / 62746-84-3	HMDB0001548	BioDeepDB	1	pos	8.7272e+07	8.66134e+07	8.36099e+07	1.03734e+08	5.12853e+07	9.06986e+07	1.21093e+08	7.31198e+07	6.84527e+07	1.19363e+08	9.82755e+07	6.05771e+07	4.52304e+07	9.32906e+07	8.02965e+07	7.19741e+07	1.42858e+08	1.17847e+08	9.87183e+07	6.30813e+07	1.31398e+08	6.10827e+07	8.87094e+07	1.12109e+08
M206T737	Lipoamide	206.147	737.4	205.06	3.96577	C8H15NOS2	[M+H]+	Dithiolanes	Lipoamides	C00248		940-69-2	HMDB0000962	BioDeepDB	1	pos	362640	453129	529479	617794	334128	587000	928888	856685	770573	686393	1.46846e+06	792309	862309	263532	420222	972714	532348	628287	442870	722001	935540	487742	472371	466213
M184T291	4-Pyridoxic acid	184.06	291.4	183.053	0.412908	C8H9NO4	[M+H]+	Pyridines and derivatives	Pyridinecarboxylic acids and derivatives	C00847	Metabolism of cofactors and vitamins; Global and overview maps	82-82-6	HMDB0000017	BioDeepDB	1	pos	2.30272e+06	2.67728e+06	3.56963e+06	2.12824e+06	3.54772e+06	3.57209e+06	3.32408e+06	2.2966e+06	1.65164e+06	1.83035e+06	1.80883e+06	1.72231e+06	2.15111e+06	2.38379e+06	1.12401e+06	2.88805e+06	2.22175e+06	2.80006e+06	4.17303e+06	2.34637e+06	1.95467e+06	2.39472e+06	3.1394e+06	1.14084e+06
M121T338_1	Phenylacetaldehyde	121.065	338.2	120.058	0.198241	C8H8O	[M+H]+	Benzene and substituted derivatives	Phenylacetaldehydes	C00601	Amino acid metabolism; Xenobiotics biodegradation and metabolism; Global and overview maps	122-78-1	HMDB0006236	BioDeepDB	1	pos	2.68026e+06	1.60213e+06	2.55974e+06	4.65828e+06	7.31254e+06	1.22025e+06	9.45162e+06	3.56068e+06	89517.6	5.05034e+06	2.49426e+06	3.06547e+06	1.46497e+06	2.16564e+06	3.5311e+06	2.02539e+06	6.5229e+06	2.05906e+06	3.05427e+06	5.85403e+06	7.37727e+06	5.72631e+06	1.02396e+07	2.82984e+06
M129T137	Quinoline	128.951	137	129.058	0.311067	C9H7N	[M]+	Quinolines and derivatives		C06413		91-22-5	HMDB0033731	BioDeepDB	1	pos	79616.9	129068	199665	57641.8	54580.7	65119.7	159114	197822	150854	261741	193429	254064	473896	774531	521979	767781	758938	598715	611936	766748	885872	909991	723588	845577
M242T398	pyridoxamine dihydrochloride	242.122	398.4	241.115	2.79199	C8H14Cl2N2O2	[M+H]+	Organooxygen compounds	Alcohols and polyols			524-36-7 /		BioDeepDB	1	pos	948946	1.1483e+06	1.32067e+06	874093	1.2459e+06	1.156e+06	1.02441e+06	1.12158e+06	1.03709e+06	1.5103e+06	1.69261e+06	933394	953226	1.42164e+06	945529	1.05874e+06	1.67091e+06	1.3883e+06	1.77019e+06	1.05388e+06	1.0366e+06	1.5639e+06	996521	999915
M353T174	5'-Uridylic acid, 2'-deoxy-, disodium salt	353.009	173.8	352.005	7.66306	C9H11N2Na2O8P	[M+H]+					42155-08-8		BioDeepDB	1	pos	586217	2.3623e+06	647286	765623	2.4831e+06	1.48159e+06	1.20997e+06	2.31974e+06	3.8147e+06	5.18543e+06	2.8043e+06	4.26881e+06	4.07976e+06	4.00857e+06	5.05483e+06	4.81066e+06	6.21278e+06	4.71701e+06	4.76513e+06	5.81528e+06	6.57985e+06	6.70667e+06	6.29626e+06	8.18124e+06
M233T727	Melatonin	233.132	727.4	232.121	13.0851	C13H16N2O2	[M+H]+	Indoles and derivatives	Indoles	C01598	Environmental adaptation; Amino acid metabolism; Global and overview maps; Signaling molecules and interaction	73-31-4 / 8041-44-9	HMDB0001389	BioDeepDB	1	pos	201683	131393	222819	169997	184813	294739	433807	408299	241719	371123	340449	184389	223603	212941	494399	258438	299951	305699	589007	295288	258997	333609	243074	267378
M527T100_1	Cytidine-5'-triphosphoric acid disodium salt	526.947	99.6	526.948	1.70795	C9H14N3Na2O14P3	[M]+					36051-68-0		BioDeepDB	1	pos	4.74387e+06	1.49989e+07	1.49473e+07	1.52659e+07	2.06778e+07	1.86051e+07	1.6126e+07	1.41932e+07	2.51442e+07	1.98124e+07	5.53067e+06	2.63562e+07	2.30397e+07	1.82298e+07	2.50334e+07	2.55246e+07	1.86971e+07	1.79051e+07	2.12148e+07	2.03585e+07	1.96464e+07	2.02242e+07	2.16066e+07	6.34717e+06
M156T776	3-Indoleacetonitrile	156.12	776.3	156.069	2.06703	C10H8N2	[M]+	Indoles and derivatives	Indoles	C02938	Amino acid metabolism; Global and overview maps	771-51-7	HMDB0006524	BioDeepDB	1	pos	7.07182e+06	1.61117e+07	7.76702e+06	2.03413e+07	1.06874e+07	7.728e+06	1.98845e+07	1.83194e+07	2.08731e+07	2.03983e+07	7.05663e+06	1.77355e+07	2.45027e+07	7.54801e+06	1.38071e+07	1.91947e+07	8.6585e+06	1.35719e+07	1.94265e+07	1.75109e+07	1.88065e+07	1.20965e+07	2.33497e+07	2.23013e+07
M313T816	Aflatoxin B1	313.237	816.3	312.063	4.20742	C17H12O6	[M+H]+	Coumarins and derivatives	Furanocoumarins	C06800	Biosynthesis of other secondary metabolites; Global and overview maps; Xenobiotics biodegradation and metabolism; Cancer: specific types	1162-65-8	HMDB0006552	BioDeepDB	1	pos	1.16551e+06	1.18282e+06	995335	2.35652e+06	1.08475e+06	1.47142e+06	1.69163e+06	1.30787e+06	2.35048e+06	1.42648e+06	2.37918e+06	2.02303e+06	1.02399e+06	1.15019e+06	1.15394e+06	1.92584e+06	1.38301e+06	1.52317e+06	2.80372e+06	2.73382e+06	1.40011e+06	2.14806e+06	1.52015e+06	703215
M219T740	Cis-zeatin	219.138	740.2	219.112	1.32522	C10H13N5O	[M]+	Imidazopyrimidines	Purines and purine derivatives	C00371	Chemical structure transformation maps; Signal transduction; Global and overview maps; Metabolism of terpenoids and polyketides	1637-39-4 / 32771-64-5	HMDB0012204	BioDeepDB	1	pos	2.01202e+06	4.29559e+06	3.44892e+06	2.06847e+06	1.4743e+06	4.994e+06	3.11506e+06	3.86481e+06	4.03812e+06	2.98774e+06	2.86019e+06	2.93275e+06	1.40988e+06	1.6585e+06	3.43494e+06	1.35858e+06	5.74155e+06	4.2527e+06	6.25671e+06	1.26768e+06	2.71943e+06	3.11083e+06	1.56219e+06	1.55111e+06
M609T501_1	UDP-a-D-Galactose disodium salt	609.386	501.2	610.019	3.12835	C15H22N2Na2O17P2	[M]+					137868-52-1		BioDeepDB	1	pos	1.08928e+06	295797	430267	557214	3.49327e+06	4.03797e+06	212525	1.39522e+06	365587	894164	399574	1.12405e+06	923180	315320	471181	425013	1.08857e+06	933375	676960	508823	557346	357552	1.1682e+06	476105
M153T403	2',4'-Dihydroxyacetophenone	153.102	403	152.047	4.85037	C8H8O3	[M+H]+	Benzene and substituted derivatives	Acetophenones	C03663		89-84-9	HMDB0029659	BioDeepDB	1	pos	510845	315784	375237	393700	573070	437141	687427	466671	568980	708795	551519	417378	601015	539877	403264	564917	429995	469802	427559	533036	551969	471285	636897	717656
M111T481	Pyrrole-2-carboxylic acid	111.117	480.7	111.032	2.96988	C5H5NO2	[M]+	Pyrroles	Pyrrole carboxylic acids and derivatives	C05942	Amino acid metabolism	634-97-9	HMDB0004230	BioDeepDB	1	pos	8.19967e+06	7.34231e+06	8.83821e+06	7.97249e+06	1.43532e+07	7.31804e+06	1.87054e+07	1.10966e+07	1.81251e+07	2.04732e+07	1.18147e+07	6.66242e+06	1.77434e+07	1.32843e+07	2.19152e+07	1.71812e+07	1.03791e+07	8.2278e+06	1.61349e+07	1.13584e+07	1.25375e+07	1.29908e+07	1.20241e+07	1.38588e+07
M146T114	4-Guanidinobutanoic acid	146.045	113.8	145.085	0.571009	C5H11N3O2	[M+H]+	Carboxylic acids and derivatives	Amino acids, peptides, and analogues	C01035	Amino acid metabolism; Global and overview maps	463-00-3	HMDB0003464	BioDeepDB	1	pos	2.63183e+06	2.01867e+06	1.81041e+06	2.40437e+06	2.20901e+06	2.29053e+06	1.73263e+06	2.068e+06	464484	2.19981e+06	2.37169e+06	1.30657e+06	1.39023e+06	2.315e+06	1.75563e+06	2.20678e+06	2.38878e+06	2.2924e+06	2.42313e+06	2.11943e+06	2.26365e+06	2.04791e+06	2.31186e+06	1.66411e+06
M226T719	Porphobilinogen	226.18	718.8	226.095	2.12643	C10H14N2O4	[M]+	Organonitrogen compounds	Amines	C00931	Metabolism of cofactors and vitamins; Global and overview maps	487-90-1	HMDB0000245	BioDeepDB	1	pos	1.08898e+07	6.86053e+06	9.81811e+06	7.74385e+06	1.10123e+07	6.5987e+06	5.2735e+06	1.05291e+07	6.68657e+06	6.63106e+06	6.8536e+06	1.09219e+07	8.62193e+06	6.62376e+06	8.28907e+06	7.91043e+06	8.71553e+06	8.15631e+06	1.432e+07	8.73766e+06	9.9625e+06	9.45231e+06	5.74208e+06	1.01086e+07
M218T589	N-Acetylserotonin	218.211	589.5	218.106	0.321952	C12H14N2O2	[M]+	Indoles and derivatives	Hydroxyindoles	C00978	Amino acid metabolism; Global and overview maps	1210-83-9	HMDB0001238	BioDeepDB	1	pos	1.11701e+06	2.45216e+06	3.3114e+06	1.8666e+06	1.01033e+06	1.26845e+06	4.39827e+06	3.55068e+06	2.21959e+06	782364	2.64488e+06	2.45566e+06	452838	2.83163e+06	1.77074e+06	1.09521e+06	59638.4	1.73316e+06	3.32209e+06	3.835e+06	2.6748e+06	3.02639e+06	4.37798e+06	2.88956e+06
M183T191	Homovanillic acid	183.084	191	182.058	11.2032	C9H10O4	[M+H]+	Phenols	Methoxyphenols	C05582	Amino acid metabolism; Nervous system; Global and overview maps	306-08-1	HMDB0000118	BioDeepDB	1	pos	3.93306e+07	3.23966e+07	2.92233e+07	3.31168e+07	4.74564e+07	3.89162e+07	1.02021e+07	3.35439e+07	4.38078e+07	4.73629e+07	2.73536e+07	3.39785e+07	2.61921e+07	2.45017e+07	2.67422e+07	2.8366e+07	3.13477e+07	3.22291e+07	3.0318e+07	2.26955e+07	3.58434e+07	3.58131e+07	3.24234e+07	2.6882e+07
M137T125	2-Hydroxyphenethylamine	137.079	124.7	137.084	0.122712	C8H11NO	[M]+	Organonitrogen compounds	Amines	C02735		7568-93-6	HMDB0001065	BioDeepDB	1	pos	5.75394e+06	2.34388e+06	4.2341e+06	5.73392e+06	7.48924e+06	3.52388e+06	5.46725e+06	4.86758e+06	2.22203e+06	4.8749e+06	3.48502e+06	2.21787e+06	4.60741e+06	2.18104e+06	3.19197e+06	3.85618e+06	2.0663e+06	2.82779e+06	4.61673e+06	2.06972e+06	4.78655e+06	4.58829e+06	4.04537e+06	3.19249e+06
M107T125	Aromatic aldehyde	107.049	125.3	106.042	0.709955	C7H6O	[M+H]+			C00193		100-52-7		BioDeepDB	1	pos	1.59043e+06	399676	1.42033e+06	1.26594e+06	1.30689e+06	352192	1.44787e+06	1.61213e+06	1.78166e+06	529969	1.91722e+06	1.50476e+06	1.73255e+06	1.46762e+06	1.54224e+06	2.30428e+06	1.71915e+06	1.8422e+06	2.05586e+06	1.13093e+06	1.56838e+06	1.07301e+06	1.49354e+06	2.07609e+06
M180T126	D-Fructose	180.102	125.8	180.063	1.46165	C6H12O6	[M]+	Organooxygen compounds	Carbohydrates and carbohydrate conjugates	C00095	Endocrine and metabolic disease; Membrane transport; Sensory system; Digestive system; Carbohydrate metabolism; Global and overview maps	53188-23-1 / 87-81-0	HMDB0000660	BioDeepDB	1	pos	1.4977e+06	892505	653319	1.6159e+06	779936	881869	580941	440994	710860	1.08139e+06	834482	620174	384843	516278	609579	1.03223e+06	811877	841359	664651	693095	577175	693215	517610	700583
M199T137	Disodium beta-glycerophosphate	198.971	136.5	215.978	4.69414	C3H7Na2O6P	[M+H-H2O]+					154804-51-0		BioDeepDB	1	pos	1.51212e+07	1.94238e+07	1.81257e+07	1.50399e+07	2.14937e+07	2.41152e+07	1.462e+07	1.81971e+07	9.60011e+06	1.49256e+07	1.40038e+07	1.15705e+07	2.50468e+07	1.80226e+07	1.22811e+07	1.72643e+07	1.93852e+07	1.39315e+07	2.0173e+07	1.42626e+07	1.68044e+07	1.65821e+07	1.5386e+07	1.00426e+07
M330T168	Calcium 2-(trimethylammonio)ethyl phosphate chloride tetrahydrate	330.04	168.3	329.032	1.28469	C5H21CaClNO8P	[M+H]+					72556-74-2		BioDeepDB	1	pos	931431	841425	758449	1.27335e+06	810167	400961	762968	545226	1.19931e+06	1.84631e+06	856085	808387	848198	752842	1.0746e+06	1.42386e+06	722983	820482	1.11977e+06	603302	930615	925051	1.08934e+06	1.60217e+06
M137T146_1	2-Aminobenzoic acid	136.951	145.7	137.048	13.4126	C7H7NO2	[M]+	Benzene and substituted derivatives	Benzoic acids and derivatives	C00108	Skeleton-based classification; Biosynthesis of other secondary metabolites; Xenobiotics biodegradation and metabolism; Amino acid metabolism; Chemical structure transformation maps; Global and overview maps	118-92-3	HMDB0001123	BioDeepDB	1	pos	6.44474e+06	866887	3.91739e+06	1.0499e+07	6.28404e+06	5.7802e+06	3.29821e+06	4.38307e+06	5.27558e+06	9.81773e+06	3.94052e+06	7.82903e+06	7.01374e+06	1.47061e+06	6.49393e+06	1.01265e+07	5.75206e+06	4.61764e+06	5.82656e+06	5.52438e+06	5.56539e+06	6.21373e+06	5.20889e+06	4.84733e+06
M540T338_1	Oleuropein	540.157	338.4	540.184	5.45379	C25H32O13	[M]+			C09794		32619-42-4		BioDeepDB	1	pos	6.82616e+06	9.24774e+06	7.04901e+06	1.17372e+07	7.89571e+06	6.16744e+06	1.8675e+06	8.13689e+06	7.43339e+06	1.17126e+07	6.02735e+06	1.83901e+06	7.91646e+06	6.42477e+06	5.89608e+06	1.06085e+07	1.40502e+07	1.00832e+07	1.20211e+07	1.12719e+07	9.35511e+06	7.90534e+06	1.24512e+07	7.97346e+06
M133T148	Glycyl-glycine	133.105	148.2	132.054	6.48993	C4H8N2O3	[M+H]+	Carboxylic acids and derivatives	Amino acids, peptides, and analogues	C02037		556-50-3	HMDB0011733	BioDeepDB	1	pos	1.36621e+08	1.94056e+07	1.36094e+08	8.6067e+07	1.81271e+07	1.06028e+08	3.24275e+07	2.43119e+07	7.18509e+07	2.14719e+08	2.55376e+08	1.29177e+08	1.12594e+08	1.2227e+07	1.49769e+08	1.19047e+07	1.72014e+08	2.24709e+07	1.47778e+07	1.61338e+07	1.05722e+08	8.89714e+07	1.01818e+08	8.66001e+07
M302T151	Selenocystamine dihydrochloride	301.98	151.3	318.99	7.17265	C4H12N2Se2	[M+H-H2O]+					3542-13-0		BioDeepDB	1	pos	1.63116e+06	2.66754e+06	3.29953e+06	1.51478e+06	2.41751e+06	2.61794e+06	3.34479e+06	2.96125e+06	3.16138e+06	2.88836e+06	1.61396e+06	1.59149e+06	1.03613e+06	1.78248e+06	2.39786e+06	1.90203e+06	562481	2.04976e+06	2.38209e+06	1.91163e+06	2.1479e+06	1.80525e+06	2.40437e+06	1.68581e+06
M138T180	Tyramine	138.049	180	137.084	4.70781	C8H11NO	[M+H]+	Benzene and substituted derivatives	Phenethylamines	C00483	Chemical structure transformation maps; Digestive system; Biosynthesis of other secondary metabolites; Signaling molecules and interaction; Amino acid metabolism; Energy metabolism; Global and overview maps	51-67-2	HMDB0000306	BioDeepDB	1	pos	1.33376e+08	1.14659e+08	1.56061e+08	1.17749e+08	1.61801e+08	1.48834e+08	1.82798e+08	1.27738e+08	1.75758e+08	1.82105e+08	1.92831e+08	1.91278e+08	1.91075e+08	1.82567e+08	2.25769e+08	2.04881e+08	2.1871e+08	2.6087e+08	2.03184e+08	2.69102e+08	1.85041e+08	2.58712e+08	2.13774e+08	2.71178e+08
M399T261	sucralose	399.001	260.5	397.633	1.3815		[M+H]+					56038-13-2		BioDeepDB	1	pos	2.91359e+06	2.47716e+06	1.56211e+06	2.73236e+06	2.48992e+06	2.42954e+06	1.87065e+06	2.73232e+06	3.1635e+06	2.66974e+06	2.85024e+06	2.77472e+06	1.40613e+06	2.37707e+06	1.842e+06	2.27308e+06	2.77668e+06	2.11853e+06	1.84392e+06	2.03801e+06	2.71271e+06	2.22818e+06	3.08641e+06	2.36445e+06
M449T795_3	Luteolin 7-galactoside	449.364	795.2	448.101	12.6505	C21H20O11	[M+H]+	Flavonoids	Flavonoid glycosides			68321-11-9	HMDB0038467	BioDeepDB	1	pos	7.3308e+06	7.03167e+06	2.46249e+06	1.93538e+06	5.74087e+06	1.45281e+07	2.02556e+06	7.87559e+06	5.4196e+06	5.74865e+06	1.64108e+07	1.67066e+07	2.44947e+06	8.08914e+06	3.59823e+06	7.32533e+06	1.552e+07	1.4759e+07	1.46057e+06	1.65098e+07	1.78793e+07	1.80646e+07	2.19157e+06	4.38157e+06
M360T781	Aldosterone	360.31	781.2	360.194	2.04209	C21H28O5	[M]+	Steroids and steroid derivatives	Hydroxysteroids	C01780	Excretory system; Endocrine system; Lipid metabolism; Target-based classification: Nuclear receptors; Global and overview maps	52-39-1	HMDB0000037	BioDeepDB	1	pos	6.98753e+06	9.36238e+06	9.44033e+06	1.39745e+07	2.04206e+07	2.53057e+07	1.07693e+07	1.52286e+07	1.3614e+07	6.50145e+06	1.18516e+07	7.83068e+06	7.82485e+06	1.18377e+07	8.03048e+06	1.60887e+07	1.19871e+07	1.97008e+07	1.96044e+07	1.43635e+07	9.38362e+06	1.64806e+07	1.53601e+07	8.44986e+06
M150T308	L-Arabinose	150.055	308.1	150.053	15.9941	C5H10O5	[M]+	Organooxygen compounds	Carbohydrates and carbohydrate conjugates	C00259	Carbohydrate metabolism; Membrane transport; Global and overview maps	5328-37-0 / 147-81-9 / 87-72-9	HMDB0000646	BioDeepDB	1	pos	1.65199e+06	582728	1.63777e+06	1.08568e+06	1.27404e+06	1.88158e+06	1.64471e+06	1.921e+06	1.558e+06	570862	1.77578e+06	1.48789e+06	1.32959e+06	2.03081e+06	1.44668e+06	568196	1.66366e+06	1.40773e+06	1.89078e+06	398150	1.50438e+06	1.90498e+06	861886	640109
M402T420	25-Hydroxycholesterol	402.211	420.1	402.35	0.752415	C27H46O2	[M]+	Steroids and steroid derivatives	Cholestane steroids	C15519	Lipid metabolism	2140-46-7	HMDB0006247	BioDeepDB	1	pos	409580	2.97819e+06	3.52941e+06	1.84252e+06	3.64947e+06	331086	2.47855e+06	1.41115e+06	2.14731e+06	835268	465073	1.8794e+06	1.57072e+06	2.28734e+06	5.02683e+06	1.98332e+06	1.84825e+06	1.48015e+06	2.64639e+06	230237	1.08541e+06	317938	201008	344823
M290T307_1	Ophthalmic acid	290.134	306.8	289.285	2.27215	C11H19N3O6	[M+H]+	Carboxylic acids and derivatives	Carboxylic acid derivatives			495-27-2	HMDB0005765	BioDeepDB	1	pos	28633.3	764848	509922	15374.1	23582	24483.6	444007	427423	594619	17890.8	399208	75700.4	10096.3	403704	285360	28074.7	17843.9	523839	819028	377020	652247	153419	393660	418816
M306T391	(2S,3R)-2-(3,4,5-Trihydroxyphenyl)chroman-3,5,7-triol	306.064	391.3	306.074	13.3629	C15H14O7	[M]+					3371-27-5		BioDeepDB	1	pos	1.31234e+06	2.452e+06	3.84171e+06	739646	1.21917e+06	1.57151e+06	613550	1.45086e+06	533946	87591	1.55495e+06	642236	1.64751e+06	526703	204292	1.46245e+06	1.95332e+06	590106	818105	149598	3.47772e+06	1.12097e+06	1.87403e+06	963763
M393T322	Inosine 5'-monophosphate disodium salt hydrate	393.015	322.4	410.022	0.849841	C10H13N4Na2O9P	[M+H-H2O]+					352195-40-5		BioDeepDB	1	pos	197326	200938	287025	179196	224050	243855	599971	265945	192650	306881	403735	381166	445475	210956	270993	328646	375509	251381	232115	356898	412330	249369	235922	505783
M267T341	Deoxyguanosine	267.098	340.6	267.097	0.329058	C10H13N5O4	[M]+	Purine nucleosides	Purine 2'-deoxyribonucleosides	C00330		961-07-9	HMDB0000085	BioDeepDB	1	pos	4.29555e+06	6.26474e+06	8.72627e+06	8.09592e+06	5.69475e+06	7.73365e+06	8.18958e+06	6.82246e+06	6.24603e+06	6.45837e+06	6.93415e+06	4.63448e+06	7.59329e+06	8.46934e+06	8.03799e+06	8.10521e+06	4.60692e+06	6.99509e+06	8.76864e+06	7.05934e+06	1.02126e+07	7.15975e+06	7.79045e+06	9.58172e+06
M479T669_4	(2S)-2-[[4-[(2-Amino-4-oxo-7,8-dihydro-3H-pteridin-6-yl)methylamino]benzoyl]amino]pentanedioic acid;dihydrate	479.178	669.1	479.176	4.3825	C19H25N7O8	[M]+					207226-40-2		BioDeepDB	1	pos	940092	980733	1.51162e+06	2.50587e+06	782081	501640	1.16899e+06	1.29073e+06	2.31415e+06	2.41465e+06	929477	2.87547e+06	1.93908e+06	1.16661e+06	3.40957e+06	3.20236e+06	1.09885e+06	3.88659e+06	2.09216e+06	4.68407e+06	2.17264e+06	2.68179e+06	1.47634e+06	1.35284e+06
M291T742	Androsterone	291.231	742.1	290.225	1.62065	C19H30O2	[M+H]+	Steroids and steroid derivatives	Androstane steroids	C00523	Lipid metabolism	53-41-8	HMDB0000031	BioDeepDB	1	pos	358260	384247	705617	225239	170463	280855	784219	526075	280832	672681	1.26877e+06	1.06003e+06	587649	584947	597081	425740	539252	367346	614709	629513	458956	1.20781e+06	1.29358e+06	425287
M133T353	Ethylmalonic acid	133.086	353.3	132.115	0.375427	C5H8O4	[M+H]+	Organooxygen compounds	Carbonyl compounds			516-05-2 / 601-75-2	HMDB0000622	BioDeepDB	1	pos	936942	1.20962e+06	2.92283e+06	3.73346e+06	1.83182e+06	911146	946417	5.17028e+06	2.81421e+06	4.12754e+06	2.35958e+06	2.10972e+06	5.01284e+06	1.03677e+06	2.01132e+06	1.08921e+06	1.84404e+06	750757	3.16843e+06	3.44467e+06	1.30869e+06	1.69733e+06	964384	2.32085e+06
M184T356	Epinephrine	184.097	356.4	183.089	0.673558	C9H13NO3	[M+H]+	Phenols	Benzenediols	C00788	Circulatory system; Signal transduction; Endocrine system; Signaling molecules and interaction; Amino acid metabolism; Cellular community - prokaryotes; Global and overview maps	51-43-4	HMDB0000068	BioDeepDB	1	pos	1.37422e+06	8.73661e+06	9.4647e+06	1.84811e+06	8.22542e+06	1.15515e+07	8.83599e+06	8.05856e+06	2.29424e+06	8.88691e+06	1.04418e+07	6.27757e+06	9.05029e+06	6.81912e+06	8.4234e+06	9.41178e+06	8.85048e+06	1.36213e+07	1.53284e+07	1.33098e+07	1.1019e+07	1.15269e+07	1.44929e+07	3.12018e+06
M393T444	Ursodeoxycholic acid	393.209	443.8	392.293	1.11389	C24H40O4	[M+H]+	Steroids and steroid derivatives	Bile acids, alcohols and derivatives	C07880	Lipid metabolism	128-13-2	HMDB0000946	BioDeepDB	1	pos	1.09271e+06	1.34635e+06	764068	796279	205606	346484	728212	669585	403197	915399	366055	724096	1.1487e+06	1.01787e+06	1.33548e+06	380845	1.83135e+06	894701	805959	1.02082e+06	759061	774643	550132	525294
M169T380	Homogentisic acid	169.049	379.7	168.042	0.449572	C8H8O4	[M+H]+	Benzene and substituted derivatives	Phenylacetic acids	C00544	Amino acid metabolism; Metabolism of cofactors and vitamins; Xenobiotics biodegradation and metabolism; Global and overview maps	451-13-8	HMDB0000130	BioDeepDB	1	pos	1.92371e+06	1.82914e+06	2.32329e+06	2.01621e+06	2.55159e+06	1.50507e+06	1.34769e+06	1.07824e+06	2.65491e+06	3.67351e+06	1.92682e+06	1.56166e+06	1.35046e+06	1.80298e+06	1.13643e+06	1.49981e+06	1.31217e+06	1.74062e+06	1.49798e+06	1.22754e+06	1.6313e+06	1.74693e+06	1.63672e+06	2.36845e+06
M524T812_1	Retinyl palmitate	524.363	811.6	524.459	4.47332	C36H60O2	[M]+	Fatty Acyls	Fatty acid esters	C02588	Metabolism of cofactors and vitamins	79-81-2	HMDB0003648	BioDeepDB	1	pos	9.59995e+07	1.86118e+08	2.82347e+08	2.51727e+08	1.46971e+08	3.97611e+08	3.92105e+08	3.08923e+08	2.53147e+08	3.5025e+08	3.14105e+08	3.44793e+08	7.72233e+07	6.1606e+07	8.57451e+07	2.86856e+08	1.79978e+08	5.6605e+08	1.76717e+08	3.18262e+08	2.56319e+08	2.11677e+08	2.9791e+08	3.31028e+08
M329T427	Cortexolone	329.206	426.9	346.214	1.71929	C21H30O4	[M+H-H2O]+	Steroids and steroid derivatives	Hydroxysteroids	C05488	Lipid metabolism; Endocrine and metabolic disease; Global and overview maps; Endocrine system	152-58-9	HMDB0000015	BioDeepDB	1	pos	67631.3	28902.1	64635.2	41733.2	21113.6	20683	83392.9	85362.3	30070.2	60606.8	125646	57636.9	122274	112398	64725.8	21435.1	36431.6	78515.6	91478.2	59232.9	38631.6	38349.1	63395.4	39189.2
M196T387	Selenomethionine	196.108	386.7	196.106	9.79051	C5H11NO2Se	[M]+	Carboxylic acids and derivatives	Amino acids, peptides, and analogues			1464-42-2 / 3211-76-5	HMDB0003966	BioDeepDB	1	pos	6.26267e+06	7.30782e+06	5.97824e+06	3.42448e+06	5.82309e+06	5.80332e+06	4.08757e+06	3.44502e+06	3.30192e+06	8.51808e+06	9.06377e+06	8.22282e+06	5.71175e+06	6.18978e+06	2.90918e+06	7.12804e+06	7.2859e+06	4.91235e+06	5.84815e+06	6.65671e+06	6.36303e+06	8.41266e+06	5.45093e+06	5.11255e+06
M392T838	NP-002336	392.254	838.2	392.256	6.8177	C23H36O5	[M]+	Endogenous Metabolites; Natural Products/Medicines						mzCloud	1	pos	3.1759e+06	2.90491e+06	3.89267e+06	5.24272e+06	5.10102e+06	4.94041e+06	3.14972e+06	3.76435e+06	6.24569e+06	2.34778e+06	2.95144e+06	3.20315e+06	2.61034e+06	2.75428e+06	6.22114e+06	3.76307e+06	7.41755e+06	4.22227e+06	3.53158e+06	6.92409e+06	3.23557e+06	3.16932e+06	5.48254e+06	6.32857e+06
M170T397	3,4-Dihydroxyphenylglycol	170.06	397.2	170.058	12.3486	C8H10O4	[M]+	Phenols	Benzenediols	C05576	Amino acid metabolism; Global and overview maps	28822-73-3 / 3343-19-9	HMDB0000318	BioDeepDB	1	pos	2.48281e+06	2.55857e+06	2.51278e+06	3.87134e+06	1.91273e+06	2.78965e+06	2.31555e+06	2.41384e+06	3.81349e+06	3.24411e+06	4.01475e+06	4.04703e+06	7.2193e+06	5.69358e+06	5.99458e+06	3.83716e+06	6.06551e+06	6.22177e+06	5.10622e+06	6.69544e+06	4.9198e+06	4.4099e+06	3.30458e+06	5.35659e+06
M272T417	Heptadecanoic acid	271.679	416.5	270.451	1.53857	C17H34O2	[M+H]+	Fatty Acyls	Fatty acids and conjugates			506-12-7	HMDB0002259	BioDeepDB	1	pos	413832	70392	479039	624035	82921.4	94483.4	74180.4	401343	399974	57929.7	339978	275712	232027	96404.6	632125	385740	112736	494627	519574	103231	290870	318708	148968	471651
M174T454	N-Methyltryptamine	174.002	454	174.116	4.06672	C11H14N2	[M]+	Indoles and derivatives	Tryptamines and derivatives	C06213	Amino acid metabolism; Global and overview maps	61-49-4	HMDB0004370	BioDeepDB	1	pos	2327.68	35901	33077.9	281950	1.17229e+06	178239	31125.2	151882	14648.6	71287.5	37368	161530	11201.2	97749	313551	178117	17624.6	27270.4	137751	21931.2	221945	77852.6	241953	57633.8
M263T566	(2R,3R,4S,5S,6R)-2-[(3Z)-hex-3-en-1-yloxy]-6-(hydroxymethyl)oxane-3,4,5-triol	263.15	566.3	262.142	3.36523	C12H22O6	[M+H]+	Endogenous Metabolites; Natural Products/Medicines						mzCloud	1	pos	2.98501e+06	1.42068e+06	1.07453e+06	3.74333e+06	1.21481e+06	619736	1.66376e+06	996040	3.10099e+06	3.41826e+06	1.66772e+06	1.45902e+06	2.52337e+06	993640	2.66888e+06	2.24721e+06	1.54411e+06	1.66508e+06	1.83925e+06	1.97416e+06	2.12314e+06	2.18363e+06	1.36663e+06	1.71158e+06
M186T585	Sodium phenylpyruvate	186.149	584.6	186.029	1.51254	C9H7NaO3	[M]+					114-76-1		BioDeepDB	1	pos	1.96878e+06	652393	1.06714e+06	1.87704e+06	2.01362e+06	1.31802e+06	2.23652e+06	1.78152e+06	1.46846e+06	2.5692e+06	1.35393e+06	2.92673e+06	794881	2.1966e+06	1.96733e+06	830916	2.10025e+06	1.7547e+06	4.19109e+06	2.73164e+06	2.45709e+06	2.34163e+06	2.2511e+06	1.90416e+06
M932T564_1	Angiotensin III	931.516	564	930.508	0.153997	C46H66N12O9	[M+H]+	Carboxylic acids and derivatives	Amino acids, peptides, and analogues	C15848	Endocrine system	12687-51-3	HMDB0001036	BioDeepDB	1	pos	335445	1.14509e+06	167362	238957	26554.8	10638	173797	97437.9	155635	1.20658e+06	312508	16637.8	26272.3	112860	171897	18332.5	536978	21351.2	90562.3	373239	570300	690402	354087	23269
M427T798	Lanosterin	427.263	797.5	426.386	0.754182	C30H50O	[M+H]+	Prenol lipids	Triterpenoids	C01724	Lipid metabolism; Global and overview maps	79-63-0	HMDB0001251	BioDeepDB	1	pos	5.11619e+06	2.91028e+06	4.30326e+06	6.2706e+06	7.49535e+06	7.4416e+06	5.49129e+06	4.43664e+06	3.7899e+06	5.35182e+06	6.64979e+06	4.89981e+06	4.34826e+06	2.2766e+06	4.91767e+06	5.77595e+06	3.54822e+06	6.13424e+06	4.98436e+06	3.4968e+06	4.07098e+06	4.69803e+06	4.36702e+06	2.29253e+06
M467T486_2	Glycocholic acid	466.596	486.1	465.309	4.74566	C26H43NO6	[M+H]+	Steroids and steroid derivatives	Bile acids, alcohols and derivatives	C01921	Lipid metabolism; Global and overview maps; Digestive system	475-31-0	HMDB0000138	BioDeepDB	1	pos	1.93269e+06	1.5755e+06	3.7114e+06	1.18288e+06	3.19499e+06	2.28785e+06	3.17958e+06	1.8549e+06	3.79736e+06	1.75614e+06	1.78091e+06	1.25571e+06	2.37869e+06	1.29131e+06	2.71085e+06	1.8157e+06	1.46671e+06	1.53535e+06	1.88625e+06	2.81223e+06	2.87581e+06	2.45612e+06	1.88524e+06	2.57758e+06
M330T771	17-Hydroxyprogesterone	330.263	771.4	330.219	0.537273	C21H30O3	[M]+	Steroids and steroid derivatives	Pregnane steroids	C01176	Lipid metabolism; Endocrine and metabolic disease; Global and overview maps; Endocrine system	68-96-2	HMDB0000374	BioDeepDB	1	pos	4.7053e+06	1.1419e+07	1.18266e+07	5.80284e+06	1.88334e+07	3.97537e+07	9.36136e+06	8.78551e+06	807611	4.5575e+06	4.56218e+06	1.51535e+06	9.40392e+06	8.69192e+06	314781	1.11878e+07	4.7236e+06	9.18492e+06	2.06793e+07	4.71545e+06	6.64247e+06	5.48226e+06	1.11086e+07	483568
M692T499	Phosphatidylethanolamine 16_0-16_0	691.511	499.4	691.515	5.50238	C37H74NO8P	[M]+					5681-36-7		BioDeepDB	1	pos	143301	1.03954e+06	2.95067e+06	2.37599e+06	2.63618e+06	3.35534e+06	267144	3.60325e+06	3.47464e+06	72169.2	1.90083e+06	2.24376e+06	570984	3.31369e+06	3.25993e+06	1.79145e+06	686425	2.85317e+06	318279	14156.5	2.32455e+06	3.62634e+06	1.99056e+06	1.90614e+06
M647T656_1	Trisodium;6-[[[5-(2,4-dioxopyrimidin-1-yl)-3,4-dihydroxyoxolan-2-yl]methoxy-oxidophosphoryl]oxy-oxidophosphoryl]oxy-3,4,5-trihydroxyoxane-2-carboxylate	646.999	656.5	645.98	17.5857	C15H19N2Na3O18P2	[M+H]+					63700-19-6		BioDeepDB	1	pos	181457	108.731	90.5712	422403	390016	522823	230.08	134.453	126.181	516144	231.029	9965.9	375131	38.3441	47.7043	585350	377375	129.978	70.53	78.8631	9733.6	145.789	241.002	137.937
M105T502	Propyl chloroformate	105.037	501.6	122.013	2.14641	C4H7ClO2	[M+H-H2O]+					109-61-5		BioDeepDB	1	pos	54485.6	39686.1	47676.3	35644.2	61758.3	78304.3	55891.2	52385.4	29800.7	46861.3	47028.9	50811.5	37207.6	54248.3	56518.2	29350.9	55159.5	30995.9	72499.8	56878.7	69439.7	48205.5	56546.3	45292.5
M651T506_9	UDP-GlcNAc Disodium Salt	651.058	505.9	651.045	12.0174	C17H25N3Na2O17P2	[M-H2O+NH4]+					91183-98-1		BioDeepDB	1	pos	3.11892e+06	4.29734e+06	4.30365e+06	2.45528e+06	5.47277e+06	8.992e+06	3.8163e+06	3.00625e+06	1.16619e+06	2.56164e+06	2.82388e+06	1.97808e+06	3.93148e+06	4.1063e+06	261149	5.26609e+06	3.12405e+06	3.41657e+06	6.24551e+06	2.35651e+06	3.17454e+06	3.67866e+06	3.52533e+06	1.30624e+06
M179T544	L-Gulonolactone	179.063	543.8	178.048	6.40204	C6H10O6	[M+H]+	Lactones	Gamma butyrolactones	C01040	Carbohydrate metabolism; Global and overview maps	1128-23-0 / 3327-64-8	HMDB0003466	BioDeepDB	1	pos	6.17718e+06	3.68136e+06	1.2885e+07	1.59046e+06	7.94546e+06	7.84963e+06	1.28928e+07	1.15307e+07	2.0063e+06	2.48809e+06	6.21267e+06	3.55786e+06	4.3215e+06	2.23425e+06	7.58584e+06	7.3794e+06	2.94513e+06	6.77219e+06	8.16741e+06	3.51055e+06	2.90845e+06	2.99979e+06	3.71894e+06	9.93553e+06
M777T651_1	Thyroxine	776.577	650.8	776.687	7.58977	C15H11I4NO4	[M]+	Carboxylic acids and derivatives	Amino acids, peptides, and analogues	C01829	Digestive system; Endocrine system; Signaling molecules and interaction; Amino acid metabolism; Immune disease; Global and overview maps	51-48-9	HMDB0000248	BioDeepDB	1	pos	1.15641e+06	980531	835748	639205	587145	745801	1.14546e+06	853488	641304	810408	1.27396e+06	780437	838460	587170	433658	817751	701909	792614	1.23414e+06	1.23813e+06	818884	881436	793266	1.16601e+06
M488T773_1	Taurolithocholic acid sodium salt	488.274	772.8	505.284	4.64083	C26H44NNaO5S	[M+H-H2O]+					6042-32-6		BioDeepDB	1	pos	2.5233e+07	1.97505e+07	2.4752e+07	1.87444e+07	1.46186e+07	1.57437e+07	2.67047e+07	2.34007e+07	8.438e+06	1.74928e+07	1.89933e+07	2.48358e+07	2.02678e+07	2.2638e+07	7.57388e+06	1.94174e+07	2.06058e+07	1.54567e+07	1.63691e+07	2.49531e+07	2.23613e+07	8.73541e+06	7.59299e+06	9.97805e+06
M526T569_1	3,5-Diiodothyronine	526.218	568.8	524.893	7.30856	C15H13I2NO4	[M+H]+	Carboxylic acids and derivatives	Amino acids, peptides, and analogues			1041-01-6 / 534-51-0	HMDB0000582	BioDeepDB	1	pos	4.24748e+06	22549.1	83213.3	9.50513e+06	1.32648e+07	4.85899e+06	168635	34906	391429	3.31908e+06	34361.8	36030.6	6.43063e+06	58180	53866.3	5.07377e+06	1.1486e+07	196469	83392.6	8199.64	23721.4	109386	27250.2	2.17756e+06
M268T771	DL-Homocystine	268.263	771.1	268.055	1.72751	C8H16N2O4S2	[M]+	Carboxylic acids and derivatives	Amino acids, peptides, and analogues	C01817	Amino acid metabolism	870-93-9 / 626-72-2 / 462-10-2	HMDB0000575	BioDeepDB	1	pos	2.94336e+06	3.70153e+06	4.33925e+06	3.20902e+06	3.22127e+06	969110	3.11692e+06	4.06989e+06	4.80376e+06	4.55007e+06	2.35706e+06	2.79716e+06	3.91894e+06	3.31299e+06	2.70109e+06	2.33173e+06	1.92586e+06	1.70752e+06	2.44071e+06	2.98492e+06	3.41171e+06	3.52562e+06	4.62748e+06	3.06699e+06
M303T302	NP-015468	303.1	302.4	320.105	7.17585	C20H16O4	[M+H-H2O]+	Endogenous Metabolites; Natural Products/Medicines						mzCloud	1	pos	1.34488e+06	2.14375e+06	630453	1.04196e+06	717772	635934	1.85019e+06	1.0724e+06	1.74161e+06	3.75764e+06	625330	632726	857718	1.30612e+06	868303	2.07868e+06	737785	630609	1.45868e+06	992835	1.11243e+06	970202	4.26254e+06	2.45231e+06
M254T721	Palmitoleic acid	254.223	720.8	254.225	6.68705	C16H30O2	[M]+	Fatty Acyls	Fatty acids and conjugates	C08362	Lipid metabolism	373-49-9	HMDB0003229	BioDeepDB	1	pos	301937	296578	232865	278007	114428	24712.1	146067	199599	360262	226527	340976	455099	324317	235493	208547	305741	141527	230664	161695	217603	343990	149611	204877	342452
M109T682	m-Cresol	109.101	681.7	108.058	3.3301	C7H8O	[M+H]+	Phenols	Cresols	C01467	Xenobiotics biodegradation and metabolism; Global and overview maps	108-39-4	HMDB0002048	BioDeepDB	1	pos	1.07908e+06	3.0492e+06	1.25067e+06	7.09067e+06	2.63833e+06	1.72418e+06	764969	581134	1.12239e+06	2.71563e+06	1.87278e+06	1.75325e+06	265874	1.97263e+06	873557	862842	303451	1.01008e+06	293567	446469	835011	426690	561536	889778
M185T709	Phosphoserine	185.165	709.3	185.009	0.21051	C3H8NO6P	[M]+	Carboxylic acids and derivatives	Amino acids, peptides, and analogues	C01005	Biosynthesis of other secondary metabolites; Translation; Amino acid metabolism; Energy metabolism; Global and overview maps	407-41-0	HMDB0000272	BioDeepDB	1	pos	886322	542409	896013	804601	914248	806259	525718	1.41118e+06	1.4103e+06	467759	1.37129e+06	1.43223e+06	843826	1.36885e+06	765648	1.11755e+06	1.9639e+06	1.53757e+06	766111	2.00285e+06	1.30938e+06	672853	623411	1.52551e+06
M271T739	Baicalein	271.274	739.2	270.053	2.3952	C15H10O5	[M+H]+	Flavonoids	Flavonoid glycosides	C10023		192224-98-9 / 491-67-8	HMDB0031991	BioDeepDB	1	pos	1.62358e+06	1.84236e+06	1.21225e+06	495195	515549	1.02002e+06	673878	972256	629085	784869	1.81359e+06	2.48062e+06	2.25752e+06	1.26175e+06	706781	702438	2.10999e+06	744683	622137	1.01442e+06	2.63772e+06	2.53921e+06	1.38612e+06	1.19963e+06
M356T817	Monooleoylglycerol	356.279	816.5	356.54	0.674875	C21H40O4	[M]+	Carboxylic acids and derivatives	Carboxylic acid derivatives			111-03-5 /	HMDB0094684	BioDeepDB	1	pos	1.61866e+06	3.99226e+06	1.32193e+06	1.4161e+06	1.11977e+06	954881	3.82158e+06	3.70811e+06	1.07613e+06	1.23336e+06	2.4468e+06	3.78866e+06	4.87427e+06	3.36134e+06	1.09015e+06	1.46465e+06	1.88465e+06	3.43416e+06	874196	2.48674e+06	3.58464e+06	2.92651e+06	2.70408e+06	2.95999e+06
M384T783	7-Dehydrocholesterol	384.347	783	384.339	2.56675	C27H44O	[M]+	Steroids and steroid derivatives	Cholestane steroids	C01164	Lipid metabolism; Global and overview maps; Metabolism of terpenoids and polyketides	434-16-2	HMDB0000032	BioDeepDB	1	pos	428274	789287	649509	1.09004e+06	514749	362110	1.0273e+06	2.39771e+06	339565	976924	1.5922e+06	270038	1.70096e+06	1.44904e+06	485236	1.41514e+06	1.04029e+06	1.69265e+06	378580	967431	372208	205993	1.78058e+06	748906
M327T790	Cytidine, cyclic 2',3'-(hydrogen phosphate), monosodium salt	327.007	789.9	327.023	1.80556	C9H11N3NaO7P	[M]+					15718-51-1		BioDeepDB	1	pos	2.08251e+06	2.71477e+06	2.23645e+06	6.85299e+06	2.27167e+06	4.58964e+06	4.71649e+06	2.11459e+06	3.99935e+06	2.18391e+06	3.64575e+06	5.41515e+06	3.78976e+06	3.43805e+06	2.93333e+06	2.3705e+06	6.10322e+06	3.21327e+06	6.78488e+06	5.26257e+06	5.18409e+06	5.80261e+06	2.72344e+06	3.03258e+06
M397T802_1	Ergocalciferol	397.201	801.6	396.339	0.435029	C28H44O	[M+H]+	Steroids and steroid derivatives	Vitamin D and derivatives	C05441	Lipid metabolism; Global and overview maps	50-14-6	HMDB0000900	BioDeepDB	1	pos	2.32413e+06	2.02766e+06	6.09034e+06	3.60285e+06	2.09643e+06	728208	790591	1.35496e+06	1.78837e+06	2.41014e+06	3.5585e+06	4.8111e+06	3.31122e+06	2.61491e+06	3.96426e+06	1.67531e+06	1.98195e+06	3.22453e+06	4.00617e+06	4.24362e+06	2.26098e+06	2.0816e+06	1.74929e+06	4.22348e+06
M332T749	Alpha-Linolenoyl ethanolamide	332.297	749.2	349.298	19.6631	C22H39NO2	[M+H-H2O]+	Organonitrogen compounds	Amines	C13828		150314-34-4	HMDB0013624	BioDeepDB	1	pos	6.87462e+06	3.90741e+06	4.83923e+06	5.28897e+06	8.04442e+06	2.46571e+06	5.01808e+06	2.23958e+06	5.65616e+06	1.35912e+07	4.36697e+06	5.79095e+06	3.52469e+06	5.41938e+06	6.86367e+06	3.19109e+06	3.21096e+06	3.2303e+06	5.3913e+06	3.1638e+06	3.39655e+06	3.758e+06	8.11916e+06	4.85343e+06
M315T671	omega-3 Arachidonic Acid ethyl ester	315.264	670.6	332.272	1.57454	C22H36O2	[M+H-H2O]+					123940-93-2		BioDeepDB	1	pos	266418	51400.6	65596.8	144691	309671	245316	43024	63236.5	224257	412756	155194	76228	401121	91085.6	140293	303660	344548	97210.6	146335	66744.2	31527.2	41331.7	147944	29614.7
M638T735_2	GlcNAcbeta1-3Galbeta1-4GlcNAcbeta-Sp	638.24	734.7	655.255	11.4319	C24H41N5O16	[M+H-H2O]+							BioDeepDB	1	pos	2.41119e+06	1.47716e+06	7.86068e+06	6.68951e+06	2.61351e+06	6.05009e+06	7.4862e+06	3.23626e+06	1.04493e+07	2.42869e+06	1.38981e+07	4.55065e+06	4.26141e+06	5.65593e+06	1.74075e+06	7.4475e+06	7.60861e+06	7.98684e+06	6.32892e+06	6.84706e+06	6.87918e+06	7.36421e+06	4.20924e+06	801809
M169T36	7-chlorothieno[2,3-c]Pyridine	168.976	35.8	168.975	7.11455	C7H4ClNS	[M]+					28948-58-5		BioDeepDB	1	pos	4.44052e+06	3.93999e+06	4.57645e+06	3.40129e+06	2.13025e+06	3.10705e+06	4.58716e+06	3.52106e+06	2.82491e+06	2.64918e+06	2.27046e+06	3.22473e+06	2.58744e+06	3.50159e+06	2.64101e+06	3.74648e+06	3.13596e+06	7.15301e+06	3.0808e+06	4.93736e+06	5.32851e+06	2.8104e+06	6.33236e+06	4.8939e+06
M191T539	CLOPIDOL	190.991	538.9	190.99	0.68483	C7H7Cl2NO	[M]+					2971-90-6		BioDeepDB	1	pos	1.58391e+07	5.96926e+06	1.49719e+07	9.90597e+06	1.73663e+07	1.39742e+07	1.3162e+07	1.67461e+07	1.35693e+07	1.19132e+07	2.05233e+07	1.43791e+07	1.67934e+07	1.09294e+07	1.75999e+07	7.30323e+06	3.24357e+07	1.37779e+07	1.46795e+07	7.77645e+06	1.37134e+07	1.35386e+07	4.99235e+06	1.36551e+07
M684T671	COSMOSIIN HEXAACETATE	684.17	671	684.169	0.8259	C33H32O16	[M]+							BioDeepDB	1	pos	280842	113213	522773	276955	306837	936546	346453	326047	299700	420089	215188	537839	273168	216387	61574.1	319408	374701	570418	446354	264207	265940	299359	352873	342385
M270T589	Procyclidine	270.218	589	287.225	0.865968	C19H29NO	[M+H-H2O]+	Organonitrogen compounds	Amines	C07378		77-37-2	HMDB0014531	BioDeepDB	1	pos	245856	650120	254990	847203	227356	210087	839298	699630	753515	325953	841590	743559	752363	604761	431047	693189	829987	542792	813706	459884	1.00599e+06	359099	1.06281e+06	765469
M224T769	Cerulenin	224.128	768.8	223.121	0.430548	C12H17NO3	[M+H]+	Epoxides	Oxirane carboxylic acids and derivatives	C12058		17397-89-6	HMDB0015168	BioDeepDB	1	pos	5.23923e+06	6.4708e+06	8.73933e+06	8.31167e+06	5.78014e+06	2.2915e+06	6.45531e+06	7.68179e+06	5.50583e+06	1.17944e+07	6.23004e+06	6.90527e+06	7.62668e+06	8.02243e+06	1.12247e+07	7.60357e+06	1.12069e+07	6.17234e+06	6.47484e+06	5.00692e+06	5.90699e+06	9.08116e+06	7.23408e+06	4.0563e+06
M163T575	Mephentermine	163.133	574.6	163.136	20.8419	C11H17N	[M]+	Benzene and substituted derivatives	Phenethylamines	C07889		100-92-5/1212-72-2	HMDB0015452	BioDeepDB	1	pos	1.29911e+07	4.05401e+07	1.4861e+07	1.12116e+07	1.88651e+06	1.00344e+07	4.85597e+06	8.385e+06	3.74563e+06	5.2259e+07	1.64613e+07	1.13894e+07	5.99505e+06	1.77535e+06	2.76218e+07	5.58564e+06	3.25504e+07	4.84535e+06	3.99904e+06	6.62058e+06	2.09143e+07	2.17316e+07	2.71668e+07	1.42819e+06
M640T510_20	GalNAcbeta1-4[Fucalpha1-3]GlcNAcbeta-Sp	640.265	510.4	639.26	3.57925	C24H41N5O15	[M+H]+							BioDeepDB	1	pos	6.48814e+06	7.24849e+06	3.14209e+06	7.2388e+06	3.90806e+06	2.1362e+06	4.6065e+06	2.12995e+06	3.03558e+06	2.83179e+06	3.28686e+06	615223	2.23907e+06	2.85249e+06	5.26796e+06	5.64008e+06	2.37875e+06	4.42342e+06	3.91993e+06	3.40677e+06	3.66832e+06	4.46653e+06	1.81686e+06	1.80987e+06
M127T72_3	3-Vinyl-1,2-dithiacyclohex-4-ene	127.003	71.6	144.007	27.4983	C6H8S2	[M+H-H2O]+							BioDeepDB	1	pos	3.29127e+06	3.72235e+06	2.97003e+06	3.29227e+06	3.28861e+06	2.88125e+06	3.29057e+06	1.96679e+06	2.96195e+06	2.6764e+06	2.84242e+06	2.77383e+06	2.38045e+06	2.48229e+06	2.6544e+06	2.42139e+06	2.8321e+06	2.98123e+06	2.71785e+06	1.93161e+06	2.36193e+06	2.42183e+06	2.17378e+06	2.32232e+06
M183T72	2,3-dihydrothieno-Thiadiazole Carboxylate	182.962	71.6	199.971	9.20825	C6H4N2O2S2	[M+H-H2O]+							BioDeepDB	1	pos	3.55029e+06	3.73744e+06	3.89763e+06	4.28162e+06	3.91306e+06	4.03471e+06	4.07054e+06	4.0955e+06	4.60269e+06	4.41133e+06	4.41875e+06	4.52228e+06	4.44698e+06	4.72095e+06	4.81199e+06	5.27714e+06	5.97527e+06	6.45448e+06	6.77797e+06	6.40956e+06	6.73159e+06	6.60281e+06	5.2334e+06	5.43652e+06
M184T114	Cysteine-S-sulfate	183.969	114.2	200.977	0.358756	C3H7NO5S2	[M+H-H2O]+	Carboxylic acids and derivatives	Amino acids, peptides, and analogues	C05824	Amino acid metabolism; Global and overview maps	1637-71-4	HMDB0000731	BioDeepDB	1	pos	804000	692487	543525	918231	854801	1.20235e+06	582396	872185	636939	671720	851394	889297	723054	919915	315861	819477	1.0609e+06	730814	660760	827342	975966	926869	1.13883e+06	772007
M265T72_2	Tizoxanide	265.015	71.7	265.016	3.11838	C10H7N3O4S	[M]+					173903-47-4		BioDeepDB	1	pos	8.87016e+07	5.54458e+07	3.55078e+07	9.31025e+07	3.54599e+07	4.45397e+07	4.02452e+07	3.26005e+07	2.91793e+07	4.86182e+07	5.84095e+07	3.09851e+07	4.37509e+07	4.59903e+07	4.00175e+07	4.81376e+07	2.99047e+07	4.99839e+07	3.43106e+07	4.77413e+07	2.938e+07	4.53439e+07	3.1647e+07	3.87615e+07
M155T72	Mechlorethamine	155.03	71.8	155.027	21.9312	C5H11Cl2N	[M]+	Organonitrogen compounds	Nitrogen mustard compounds	C07115		51-75-2	HMDB0015025	BioDeepDB	1	pos	1.2761e+06	801210	1.0768e+06	864916	781965	1.04376e+06	1.45781e+06	1.10619e+06	1.13672e+06	1.42177e+06	1.33895e+06	940150	2.32416e+06	1.16276e+06	1.27148e+06	1.25901e+06	1.1383e+06	1.5291e+06	1.20417e+06	1.16231e+06	1.32168e+06	1.28126e+06	1.52891e+06	1.12331e+06
M296T72	Phytol	296.305	72	296.308	8.77473	C20H40O	[M]+	Prenol lipids	Diterpenoids	C01389		150-86-7/7541-49-3 150-86-7/7541-49-3	HMDB0002019	BioDeepDB	1	pos	1.04079e+06	1.20519e+06	1.13135e+06	1.03535e+06	485340	998428	1.05107e+06	856903	424435	564548	469886	591102	3.99221e+06	1.13627e+06	514655	1.37404e+06	522046	2.33373e+06	1.18023e+06	492165	577480	620804	555146	572021
M258T72_2	Ebselen	257.977	72.1	274.985	1.92808	C13H9NOSe	[M+H-H2O]+					60940-34-3		BioDeepDB	1	pos	1.12245e+07	7.45632e+06	1.29413e+07	1.31267e+07	1.3914e+07	9.3781e+06	1.62508e+06	1.23282e+07	1.35787e+07	2.01252e+07	1.99855e+07	7.9824e+06	1.3503e+07	1.35844e+07	1.3457e+07	1.47133e+07	1.24352e+07	1.32648e+07	1.456e+07	1.05719e+07	1.22881e+07	1.12522e+07	1.12117e+07	1.5053e+07
M241T72_2	6,7-DICHLORO-3-HYDROXY-2-QUINOXALINECARBOXYLIC ACID	240.953	72.2	257.96	0.567132	C9H4Cl2N2O3	[M+H-H2O]+							BioDeepDB	1	pos	699568	1.01923e+06	742284	746194	770319	650327	919189	839156	893770	764489	743666	892678	1.08991e+06	1.09004e+06	903490	694281	712440	1.01221e+06	791046	885381	662817	990038	708189	884687
M127T72_2	Methyl methanethiosulfonate	126.99	72.3	125.981	11.0245	C2H6O2S2	[M+H]+	Sulfonyls				2949-92-0	HMDB31832	BioDeepDB	1	pos	5.55091e+06	6.65114e+06	5.42336e+06	4.67287e+06	4.55311e+06	5.58907e+06	5.02891e+06	5.86645e+06	6.23281e+06	4.7965e+06	4.60986e+06	6.05628e+06	4.99613e+06	3.33763e+06	5.78557e+06	4.54965e+06	4.43103e+06	3.56777e+06	2.84633e+06	4.94005e+06	3.88939e+06	6.25798e+06	6.77862e+06	7.70738e+06
M486T380_1	UNC0224	486.353	380.5	485.348	3.49469	C26H43N7O2	[M+H]+					1197196-48-7		BioDeepDB	1	pos	237027	211201	597006	210213	2.44325e+06	138012	602414	467926	3.31422e+07	4.50203e+06	7.44603e+06	1.21707e+07	1.11829e+07	5.03508e+07	1.04189e+07	2.987e+07	2.09654e+07	1.82689e+07	3.01266e+07	2.43607e+07	2.47007e+07	2.37294e+07	2.56784e+07	5.2935e+07
M229T96	Busulfan	229.018	95.6	246.023	11.5013	C6H14O6S2	[M+H-H2O]+	Organic sulfonic acids and derivatives	Organosulfonic acids and derivatives	C06862		55-98-1	HMDB0015143	BioDeepDB	1	pos	2.28358e+07	1.44168e+07	1.22355e+07	5.2687e+06	1.66461e+07	2.47337e+07	1.19865e+07	1.04862e+07	1.34037e+07	6.77944e+06	1.33357e+07	8.67427e+06	1.55108e+07	1.32041e+07	1.16214e+07	5.09366e+06	5.97423e+06	1.01172e+07	1.02046e+07	1.07001e+07	1.35853e+07	1.34752e+07	9.95034e+06	1.60931e+07
M149T76	Edrophonium	149.117	76.1	166.123	8.27538	C10H16NO	[M+H-H2O]+	Benzene and substituted derivatives	Aniline and substituted anilines	C06976		116-38-1/312-48-1	HMDB0015145	BioDeepDB	1	pos	2.46527e+06	2.45519e+06	2.49246e+06	2.68207e+06	2.47537e+06	2.75775e+06	2.59178e+06	2.65988e+06	2.82183e+06	3.56813e+06	2.41701e+06	2.60908e+06	2.19987e+06	2.59296e+06	2.17778e+06	2.18121e+06	2.49397e+06	2.58143e+06	2.72554e+06	2.39675e+06	2.53542e+06	2.3679e+06	2.44492e+06	3.43102e+06
M337T396	Xanthohumol	337.138	396.4	354.147	3.16191	C21H22O5	[M+H-H2O]+	Linear 1,3-diarylpropanoids	Chalcones and dihydrochalcones	C16417	Biosynthesis of other secondary metabolites	6754-58-1	HMDB0037479	BioDeepDB	1	pos	1.76707e+06	1.02742e+06	1.70021e+06	1.53405e+06	3.15243e+06	1.57448e+06	2.99169e+06	1.04662e+06	3.18081e+06	3.12511e+06	2.10397e+06	1.98005e+06	1.58401e+06	2.28778e+06	1.99644e+06	1.80495e+06	2.17288e+06	2.55651e+06	2.61836e+06	1.976e+06	4.02733e+06	3.77997e+06	3.65731e+06	2.47583e+06
M253T76	Sulfamethoxazole	253.049	76.3	253.052	11.065	C10H11N3O3S	[M]+	Benzene and substituted derivatives	Benzenesulfonamides	C07315		723-46-6	HMDB0015150	BioDeepDB	1	pos	381313	288103	419288	309022	300129	284598	323026	351383	423641	533157	476547	476528	400990	327035	394030	383457	368650	454612	328493	355084	321782	317812	326448	358234
M528T610	Hygromycin B	528.235	609.8	527.233	9.79867	C20H37N3O13	[M+H]+	Organooxygen compounds	Carbohydrates and carbohydrate conjugates	C01925		31282-04-9	HMDB0034229	BioDeepDB	1	pos	278800	313972	134151	61443.5	138157	166561	165248	127196	209699	27201.4	271969	177820	204388	73065	113911	209452	70697.7	104161	206795	215934	89295.1	186953	57691.6	124396
M527T77_2	AG-041R	527.26	76.8	544.269	3.10337	C31H36N4O5	[M+H-H2O]+					199800-49-2		BioDeepDB	1	pos	703257	591984	669234	651951	774632	589926	757902	687156	795001	753629	842688	723012	689147	621869	818363	597606	636632	791235	989317	616613	685932	651153	615076	695486
M337T77_1	HTS 01037	337.006	77	337.008	4.64041	C14H11NO5S2	[M]+					682741-29-3		BioDeepDB	1	pos	275481	204936	254375	206165	328506	250776	253282	230981	213477	298966	381652	292245	262409	285284	256590	337620	112360	334204	177139	362349	228038	218029	347652	549825
M183T77	4-(1-piperazinyl)-1H-Indole (hydrochloride)	183.11	77.1	200.119	5.67116	C12H14N3	[M+H-H2O]+					255714-24-0		BioDeepDB	1	pos	652688	519416	614784	544713	607772	433239	560107	467276	600280	681976	647561	523212	561071	490147	656981	554714	535725	775939	575895	526131	531445	546331	549802	556158
M368T77	Curcumin	368.126	77.4	368.126	1.08658	C21H20O6	[M]+	Diarylheptanoids	Linear diarylheptanoids	C10443	Biosynthesis of other secondary metabolites; Global and overview maps	458-37-7	HMDB0002269	BioDeepDB	1	pos	405370	429141	613896	61715.9	565776	419805	391999	70227.5	256742	640734	823914	458862	427049	556243	461811	511815	27203.1	353435	67698.1	486852	70258.2	344602	828649	1.22471e+06
M396T78	Cefdinir	396.042	77.9	395.036	3.72688	C14H13N5O5S2	[M+H]+	Lactams	Beta lactams	C08110		91832-40-5	HMDB0014675	BioDeepDB	1	pos	1.06091e+06	1.16294e+06	1.05342e+06	1.04202e+06	1.07077e+06	856617	1.21295e+06	1.05395e+06	1.14656e+06	978804	1.10237e+06	1.05894e+06	374360	335816	348834	334256	322452	354759	334355	311484	317730	332272	346160	329868
M600T78	N-Desethylamiodarone	600.001	78	616.992	26.5891	C23H25I2NO3	[M+H-H2O]+					96027-74-6		BioDeepDB	1	pos	382545	379884	435573	365442	380986	364721	421327	355560	329775	398628	369973	354611	405848	378734	399098	424002	474687	423581	482888	460051	439635	449453	390838	394216
M191T565_3	Dihydrolipoate	191.053	565.1	208.059	4.8887	C8H16O2S2	[M+H-H2O]+	Fatty Acyls	Fatty acids and conjugates	C02147	Metabolism of cofactors and vitamins; Global and overview maps	462-20-4	HMDB0012210	BioDeepDB	1	pos	1.24129e+06	750634	1.45016e+06	2.12684e+06	1.21297e+06	598480	1.07566e+06	1.04313e+06	1.82117e+06	1.86608e+06	1.08261e+06	1.43801e+06	1.01465e+06	671788	1.85599e+06	1.03575e+06	1.45597e+06	1.89408e+06	1.40391e+06	1.93122e+06	1.83944e+06	2.01132e+06	1.21165e+06	796271
M428T78	Oxiconazole	427.994	78.3	426.981	12.6731	C18H13Cl4N3O	[M+H]+			C08074		64211-45-6/64211-46-7		BioDeepDB	1	pos	675891	479103	682008	629097	607342	811979	672792	840260	1.00126e+06	961593	1.19392e+06	1.23467e+06	532032	595102	405126	808802	567064	472536	442394	529288	613819	411733	666845	585934
M204T474	Levamisole	204.069	473.7	204.072	14.2109	C11H12N2S	[M]+	Imidazothiazoles		C07070		14769-73-4	HMDB0014986	BioDeepDB	1	pos	416656	206032	2.00782e+06	1.17954e+06	903072	679921	1.1192e+06	1.57398e+06	2.81055e+06	231615	205915	300116	1.60297e+06	1.1054e+06	159755	271576	116167	98563.1	336812	63526.2	185206	74199.2	140816	327110
M885T79_1	TG(18_1(9Z)_18_1(9Z)_18_1(9Z))	884.783	79	884.783	0.0113022	C57H104O6	[M]+					122-32-7	HMDB05453	BioDeepDB	1	pos	717548	543208	301497	665930	589549	699681	725485	642261	669598	691725	720416	638708	801489	677016	633816	524851	491667	644399	511962	521799	513571	667016	516017	686979
M767T80_5	4-(4-{4-[(6-O-Acetyl-?-D-glucopyranosyl)oxy]-3-methoxyphenyl}tetrahydro-1H,3H-furo[3,4-c]furan-1-yl)-2-methoxyphenyl 6-O-acetyl-?-D-glucopyranoside	767.269	79.7	766.268	8.83341	C36H46O18	[M+H]+							BioDeepDB	1	pos	1.14927e+06	1.38655e+06	1.19054e+06	1.44729e+06	680174	1.1416e+06	1.41028e+06	1.12664e+06	1.52702e+06	1.53207e+06	2.22096e+06	1.54138e+06	1.14257e+06	820818	838801	1.07285e+06	1.53147e+06	1.14728e+06	1.6517e+06	1.22766e+06	1.44286e+06	746155	523324	468214
M468T87	Cromoglicic acid	468.07	87	468.069	1.28186	C23H16O11	[M]+	Benzopyrans	1-benzopyrans	C06928		16110-51-3	HMDB0015138	BioDeepDB	1	pos	884974	830937	893088	873577	862753	1.01254e+06	854651	999758	819875	818745	908193	835882	1.05877e+06	890653	908944	1.01563e+06	823434	957757	803517	836331	823176	804717	817030	811408
M649T99	Caylin-1	649.086	98.6	648.086	11.5547	C30H28Cl4N4O4	[M+H]+							BioDeepDB	1	pos	1.48557e+06	1.4889e+06	1.7254e+06	1.48073e+06	1.50932e+06	1.23702e+06	1.20625e+06	1.22425e+06	1.73272e+06	2.42809e+06	1.68161e+06	1.21927e+06	1.05599e+06	1.47935e+06	1.04509e+06	1.13369e+06	1.01912e+06	1.27982e+06	1.3465e+06	1.20459e+06	1.27455e+06	1.03185e+06	1.54815e+06	2.18132e+06
M841T81	KRN 7000	840.704	81.2	857.732	24.9386	C50H99NO9	[M+H-H2O]+			C16892		158021-47-7		BioDeepDB	1	pos	828442	508413	779574	505004	464719	456896	607883	484245	569481	885453	509921	699724	561652	508616	778626	549594	474192	518755	465685	716677	650222	689598	522354	787547
M305T81	Chloramphenicol	305	81.4	322.012	17.2656	C11H12Cl2N2O5	[M+H-H2O]+	Benzene and substituted derivatives	Nitrobenzenes	C00918		56-75-7	HMDB0014589	BioDeepDB	1	pos	1.22704e+06	5.13423e+06	2.89038e+06	1.57301e+06	3.40557e+06	3.5991e+06	2.35515e+06	2.672e+06	3.82404e+06	2.85781e+06	2.76241e+06	1.95776e+06	2.36599e+06	2.76463e+06	2.87343e+06	4.34413e+06	2.31546e+06	5.2883e+06	3.91764e+06	1.39574e+06	1.63761e+06	1.52232e+06	2.3733e+06	1.16034e+06
M846T506_1	Coenzyme Q10	845.671	505.8	862.684	6.46351	C59H90O4	[M+H-H2O]+	Prenol lipids	Quinone and hydroquinone lipids	C11378	Cell growth and death	303-98-0	HMDB0001072	BioDeepDB	1	pos	394677	162436	295518	104863	591426	217550	355259	366016	114559	189659	391367	190476	392025	218643	905816	236300	283724	126500	190017	46825.9	446679	392345	159827	4.94745e+07
M606T82_2	Epoxomicin	605.768	81.6	604.759	2.64127	C28H100N4O7	[M+H]+					134381-21-8		BioDeepDB	1	pos	1.0858e+06	876273	586913	997688	1.37118e+06	729347	959869	839680	878777	1.06543e+06	815268	816880	810379	654336	691196	711656	752028	732478	868668	645565	654402	628499	571734	600650
M353T756	Protopine	353.136	756.3	353.126	27.7513	C20H19NO5	[M]+	Protopine alkaloids		C05189	Chemical structure transformation maps; Biosynthesis of other secondary metabolites; Global and overview maps	130-86-9	HMDB0003920	BioDeepDB	1	pos	5.49774e+06	2.30068e+06	5.98992e+06	7.22851e+06	5.79685e+06	1.07568e+07	1.09138e+07	2.98881e+06	6.8683e+06	3.63376e+06	5.67945e+06	6.85989e+06	2.05393e+06	4.559e+06	7.15552e+06	1.15335e+07	1.15898e+07	1.27988e+07	1.79591e+07	3.47765e+06	6.66558e+06	8.43836e+06	6.87678e+06	7.53135e+06
M208T83	5-Bromoisoquinoline	207.972	82.5	206.968	15.8675	C9H6BrN	[M+H]+					34784-04-8		BioDeepDB	1	pos	1.14186e+06	1.21271e+06	944920	1.05109e+06	1.41527e+06	729754	1.15804e+06	984323	997976	859080	1.25359e+06	623080	602008	555957	617048	925810	992675	879613	802418	764903	865839	823242	673521	566382
M224T83	3-bromo-7-Nitroindazole	223.946	82.5	240.949	21.188	C7H4BrN3O2	[M+H-H2O]+					74209-34-0		BioDeepDB	1	pos	1.85067e+06	1.85863e+06	1.9853e+06	1.92011e+06	2.15862e+06	2.73186e+06	1.4235e+06	2.14371e+06	2.62522e+06	2.92817e+06	2.23756e+06	2.26437e+06	2.06911e+06	303337	1.50711e+06	1.48179e+06	424123	402552	2.14726e+06	289346	2.27215e+06	2.38924e+06	2.37707e+06	1.69804e+06
M267T346	Promethazine	267.127	345.8	284.135	0.875986	C17H20N2S	[M+H-H2O]+	Benzothiazines	Phenothiazines	C07404		60-87-7	HMDB0015202	BioDeepDB	1	pos	2.10123e+07	40934.8	16168.4	1.87475e+07	2.30776e+07	2.76796e+07	14458.8	4946.78	5993.37	2.09982e+07	11361.4	111774	1.66845e+07	24914.1	10181.1	2.59909e+07	1.58374e+07	17706.3	11106.8	5881.34	14437	10615.8	23985.9	12117.3
M162T119	Bethanechol	162.137	118.7	161.129	6.93239	C7H17N2O2	[M+H]+	Organonitrogen compounds	Quaternary ammonium salts	C06850		674-38-4	HMDB0015154	BioDeepDB	1	pos	6.78736e+06	8525.48	115443	6.69645e+06	8.4809e+06	7.70867e+06	197351	149273	143797	4.03328e+06	8072.72	11899.8	5.1527e+06	138251	26651.2	7.44827e+06	7.23842e+06	203106	212677	195750	195471	187155	120045	157100
M156T83	L-Histidine	156.077	82.8	155.07	0	C6H9N3O2	[M+H]+	Carboxylic acids and derivatives	Amino acids, peptides, and analogues	C00135	Cancer: overview; Membrane transport; Metabolism of other amino acids; Digestive system; Biosynthesis of other secondary metabolites; Translation; Amino acid metabolism; Chemical structure transformation maps; Global and overview maps	71-00-1	HMDB0000177	BioDeepDB	1	pos	7.06492e+07	1.51987e+08	1.67734e+08	7.77142e+07	2.1388e+08	1.71493e+08	1.81187e+08	2.15535e+08	3.13014e+07	1.68851e+08	3.20626e+07	3.2077e+07	1.15474e+08	1.45993e+08	1.72401e+08	1.64906e+08	1.62897e+08	1.30789e+08	1.39655e+08	1.6104e+08	1.4014e+08	1.67854e+08	1.675e+08	3.61926e+07
M249T84	Pyridoxamine 5'-phosphate	249.063	84.3	248.056	1.10815	C8H13N2O5P	[M+H]+	Pyridines and derivatives	Pyridoxamines	C00647	Metabolism of cofactors and vitamins; Global and overview maps; Digestive system	529-96-4	HMDB0001555	BioDeepDB	1	pos	2.06243e+06	5.08057e+06	6.69686e+06	4.89787e+06	3.98771e+06	7.5599e+06	2.94737e+06	3.84143e+06	3.24327e+06	2.33901e+06	7.4641e+06	3.99797e+06	4.55909e+06	3.13182e+06	8.07914e+06	5.40102e+06	4.06415e+06	8.89615e+06	3.68632e+06	3.03212e+06	605702	2.31818e+06	6.21155e+06	4.6862e+06
M273T85	N-((4-chlorophenyl)carbamothioyl)benzamide	273.017	84.6	290.028	11.4549	C14H11ClN2OS	[M+H-H2O]+							BioDeepDB	1	pos	5.07357e+06	1.41046e+07	4.94115e+06	8.30218e+06	1.98751e+07	2.33059e+07	2.61828e+06	1.02814e+07	1.0508e+07	1.18778e+07	1.36905e+07	1.25395e+07	1.17641e+07	1.66811e+07	1.2023e+07	2.46402e+07	3.96676e+06	8.09827e+06	6.25124e+06	8.45772e+06	4.87691e+06	5.26939e+06	3.70886e+06	9.4752e+06
M885T85_1	DISBAC10	884.624	85	884.625	1.242	C51H88N4O4S2	[M]+					169211-45-4		BioDeepDB	1	pos	84029.2	638727	136534	541231	456391	379615	447527	613992	154534	118624	560799	85716.2	664766	594685	169722	500959	491382	670882	819254	730235	594801	622685	578799	595308
M810T511_3	Acetyl-CoA	810.131	511.2	809.126	2.43911	C23H38N7O17P3S	[M+H]+	Fatty Acyls	Fatty acyl thioesters	C00024	Endocrine and metabolic disease; Cancer: overview; Metabolism of other amino acids; Chemical structure transformation maps; Signal transduction; Cell growth and death; Nervous system; Carbohydrate metabolism; Lipid metabolism; Environmental adaptation; Biosynthesis of other secondary metabolites; Xenobiotics biodegradation and metabolism; Endocrine system; Metabolism of terpenoids and polyketides…	72-89-9	HMDB0001206	BioDeepDB	1	pos	1.46206e+06	1.74582e+06	2.35027e+06	529012	1.0013e+06	696925	1.91409e+06	2.53057e+06	2.05393e+06	840302	878459	957452	1.14355e+06	1.13125e+06	304391	1.00807e+06	715478	1.11345e+06	1.35351e+06	2.46196e+06	777330	1.75764e+06	2.46744e+06	302893
M504T85	AM1241	504.068	85.4	503.071	19.9596	C22H22IN3O3	[M+H]+					444912-48-5		BioDeepDB	1	pos	2.34646e+06	2.60119e+06	1.7941e+06	2.99038e+06	3.93603e+06	1.42109e+06	3.64994e+06	2.29638e+06	2.66865e+06	2.21596e+06	2.55937e+06	3.06943e+06	2.53558e+06	3.29692e+06	4.72753e+06	3.87513e+06	2.34178e+06	2.57493e+06	3.1677e+06	1.99822e+06	2.96602e+06	2.14781e+06	2.60682e+06	2.65925e+06
M974T85_1	5,10,15,20-Tetrakis(pentafluorophenyl)porphyrin	974.068	85.4	974.059	9.22889	C44H10F20N4	[M]+					25440-14-6		BioDeepDB	1	pos	1.5486e+06	1.30143e+06	387028	1.00778e+06	1.25836e+06	1.12023e+06	452594	1.34779e+06	1.13572e+06	1.80966e+06	1.39627e+06	970631	1.35795e+06	1.21624e+06	1.26252e+06	1.65205e+06	1.32331e+06	1.52618e+06	1.19583e+06	902530	1.45081e+06	1.29415e+06	1.08415e+06	902492
M746T87_2	NADPH	746.101	86.7	745.091	3.21672	C21H30N7O17P3	[M+H]+	(5'->5')-dinucleotides		C00005	Energy metabolism; Metabolism of other amino acids; Global and overview maps; Endocrine system	53-57-6/2646-71-1	HMDB0000221	BioDeepDB	1	pos	979814	1.07636e+06	769491	1.37121e+06	1.09466e+06	689387	1.09349e+06	1.14549e+06	1.48675e+06	1.35355e+06	1.13532e+06	1.07781e+06	1.27067e+06	2.01631e+06	1.52428e+06	1.28286e+06	1.36203e+06	1.00665e+06	1.27202e+06	1.23206e+06	1.58904e+06	1.49427e+06	1.27432e+06	2.05932e+06
M539T378	Amentoflavone	539.111	378	538.09	25.2267	C30H18O10	[M+H]+	Flavonoids	Biflavonoids and polyflavonoids	C10018		1617-53-4	HMDB0030832	BioDeepDB	1	pos	332726	1.31357e+06	282444	304158	214238	153880	438200	219002	196632	346605	1.51566e+06	194055	162532	62164.6	446260	132803	986830	107012	223220	304875	444981	381885	483312	28501.1
M683T87_2	Tenuifoliside A	683.212	86.7	682.211	8.73199	C31H38O17	[M+H]+							BioDeepDB	1	pos	1.93768e+06	1.74707e+06	1.92993e+06	1.87605e+06	1.67889e+06	934092	2.09814e+06	1.69721e+06	2.00969e+06	2.23905e+06	2.10776e+06	2.03898e+06	1.13142e+06	1.04549e+06	1.32839e+06	1.03098e+06	883711	1.32011e+06	1.17013e+06	1.54185e+06	1.23404e+06	1.14956e+06	986742	1.53827e+06
M666T348_2	NADH	666.181	347.6	665.125	0.771728	C21H29N7O14P2	[M+H]+	(5'->5')-dinucleotides		C00004	Signal transduction; Endocrine system; Environmental adaptation; Energy metabolism; Global and overview maps	58-68-4	HMDB0001487	BioDeepDB	1	pos	467797	1.59039e+06	1.16878e+06	447250	1.30704e+06	706362	1.66291e+06	1.35083e+06	2.31852e+06	1.95159e+06	1.79803e+06	1.95557e+06	1.55943e+06	1.69048e+06	1.92469e+06	1.74254e+06	2.05504e+06	1.9316e+06	1.98559e+06	1.35456e+06	519041	1.71216e+06	901234	2.0544e+06
M810T87	Inositol Hexanicotinate	810.193	87.5	810.192	0.530178	C42H30N6O12	[M]+					6556-11-2		BioDeepDB	1	pos	22159.9	338956	216951	162786	287495	309039	221519	140620	391718	230160	423829	210291	423758	266986	225289	155402	219944	170686	281732	463767	104963	321199	243483	263452
M389T88	Asp-Phe-OH	389.095	87.6	388.091	7.45319	C18H16N2O8	[M+H]+							BioDeepDB	1	pos	4.44682e+06	1.03581e+06	3.33142e+06	4.98363e+06	4.5292e+06	4.21961e+06	1.47599e+07	4.42288e+06	1.33187e+07	4.64638e+06	1.23133e+06	1.19567e+07	4.56294e+06	9.29698e+06	4.21297e+06	7.89804e+06	3.96095e+06	3.92753e+06	1.06128e+07	2.87162e+06	3.76056e+06	1.06115e+07	9.56206e+06	7.63866e+06
M380T88	U-0126	380.093	87.7	380.088	14.7703	C18H16N6S2	[M]+					109511-58-2		BioDeepDB	1	pos	2.99184e+06	9.07046e+06	2.48126e+06	4.17083e+06	5.5609e+06	2.94212e+06	3.29474e+06	3.57204e+06	4.40837e+06	7.66385e+06	4.20762e+06	3.40589e+06	4.55866e+06	4.4578e+06	4.79356e+06	4.6488e+06	4.6152e+06	3.48585e+06	4.1422e+06	5.1694e+06	2.5034e+06	5.03654e+06	4.17057e+06	3.74406e+06
M496T88_1	AVE-1625	496.063	87.7	496.059	8.34489	C23H20Cl2F2N2O2S	[M]+					358970-97-5		BioDeepDB	1	pos	5.91846e+06	7.06001e+06	5.58883e+06	7.15525e+06	2.24379e+06	3.91982e+06	2.53666e+06	6.31235e+06	7.28898e+06	8.1813e+06	6.97381e+06	5.41101e+06	5.893e+06	4.81531e+06	2.8045e+06	5.29064e+06	2.19681e+06	6.35789e+06	6.43401e+06	2.4504e+06	5.83836e+06	5.89905e+06	2.07689e+06	2.60098e+06
M655T88_3	L-161,982	655.152	88.3	654.158	20.6059	C32H29F3N4O4S2	[M+H]+					147776-06-5		BioDeepDB	1	pos	1.9266e+06	3.5343e+06	3.72396e+06	2.65518e+06	2.06443e+06	2.24218e+06	2.10332e+06	3.42065e+06	2.11282e+06	3.47796e+06	3.15163e+06	2.14497e+06	3.34035e+06	3.86138e+06	4.16611e+06	4.24783e+06	3.9693e+06	4.30053e+06	4.06093e+06	3.77262e+06	3.82926e+06	3.9326e+06	3.40315e+06	3.986e+06
M704T574_1	KN-62	704.2	573.9	721.203	7.04166	C38H35N5O6S2	[M+H-H2O]+					127191-97-3		BioDeepDB	1	pos	404422	148033	165150	393229	84662.5	111074	292621	375492	443242	529150	238132	782117	317958	206835	879957	136236	451052	190665	121983	447848	310619	513352	158592	354475
M236T309	Methazolamide	236.003	309.2	236.004	2.96606	C5H8N4O3S2	[M]+	Azoles	Thiadiazoles	C07764		554-57-4	HMDB0014841	BioDeepDB	1	pos	1.79697e+06	2.23114e+06	2.11684e+06	2.00497e+06	1.90726e+06	2.17258e+06	1.85935e+06	2.68334e+06	2.47242e+06	2.97813e+06	2.2692e+06	2.65295e+06	2.48876e+06	2.60742e+06	2.67526e+06	602469	929293	2.23222e+06	832417	1.91973e+06	1.84513e+06	849728	2.55129e+06	2.16743e+06
M390T347	LH 21	390.064	346.6	407.072	1.65813	C20H20Cl3N3	[M+H-H2O]+					611207-11-5		BioDeepDB	1	pos	29139.2	20634	14767.3	25319.7	39560.1	9277.55	10698.5	25988.4	626613	721359	22647	667076	90341.2	794809	721779	201083	498144	36621.7	208025	361147	459710	468634	808296	959963
M313T683	Nivalenol	313.129	683.3	312.121	2.6315	C15H20O7	[M+H]+	Prenol lipids	Sesquiterpenoids	C06080	Metabolism of terpenoids and polyketides	23282-20-4	HMDB0004304	BioDeepDB	1	pos	249781	164960	244514	292369	245185	213646	252143	182017	364660	373502	289184	241317	144811	258839	308287	225008	342734	237100	319812	352826	314455	215908	214236	213128
M545T89_1	(2S,5R,8S)-2-[(Benzoyloxy)methyl]-3-(?-D-glucopyranosyloxy)-8-methyl-9,10-dioxatetracyclo[4.3.1.02,5.03,8]decane-6-sulfonic acid	545.132	89.2	544.125	1.15899	C23H28O13S	[M+H]+							BioDeepDB	1	pos	1.47628e+06	6.43612e+06	5.14783e+06	4.20387e+06	5.78732e+06	6.23876e+06	7.75295e+06	4.14257e+06	4.13864e+06	4.34171e+06	5.71288e+06	3.08743e+06	5.24797e+06	3.57869e+06	7.13286e+06	4.11088e+06	4.02107e+06	5.16462e+06	5.61593e+06	3.9641e+06	7.3615e+06	7.72046e+06	7.17671e+06	8.41721e+06
M517T801	1,5-Dicaffeoylquinic acid	517.135	801.5	516.127	2.1271	C25H24O12	[M+H]+	Alcohols and polyols	Cyclic alcohols and derivatives	C10445		30964-13-7	HMDB0030093	BioDeepDB	1	pos	661328	418682	486543	418466	448509	651760	569135	515103	528877	519702	698322	246614	763706	439295	134274	524754	530518	555924	603637	678851	592283	544375	421500	187176
M280T356	3-amino-4-hydroxyphenyl sulfone	280.049	356.4	280.052	10.2839	C12H12N2O4S	[M]+					7545-50-8		BioDeepDB	1	pos	2.1379e+06	2.28207e+06	2.81366e+06	1.24381e+06	1.96792e+06	1.09632e+06	2.81096e+06	1.30491e+06	1.9131e+06	1.87658e+06	1.306e+06	464922	2.32278e+06	1.52304e+06	2.67226e+06	3.16174e+06	1.61189e+06	2.03802e+06	2.64296e+06	810306	918549	1.02516e+06	940066	92844.3
M135T90	Deoxyribose	135.065	90.1	134.058	0.177692	C5H10O4	[M+H]+	Organooxygen compounds	Carbohydrates and carbohydrate conjugates	C01801	Carbohydrate metabolism; Global and overview maps	533-67-5	HMDB0003224	BioDeepDB	1	pos	258815	1.68755e+06	2.52401e+06	1.73789e+06	1.71161e+06	2.01386e+06	2.71883e+06	2.36124e+06	2.81068e+06	2.95783e+06	2.95156e+06	3.22043e+06	2.57002e+06	2.76752e+06	2.33756e+06	2.05262e+06	3.32842e+06	3.52821e+06	3.89547e+06	4.21155e+06	3.97614e+06	3.51812e+06	4.09295e+06	5.94258e+06
M280T733	Imipramine	280.191	733.1	280.194	11.0639	C19H24N2	[M]+	Benzazepines	Dibenzazepines	C07049		50-49-7	HMDB0001848	BioDeepDB	1	pos	266732	264528	425605	856300	1.0409e+06	958187	686978	1.31816e+06	758715	3.32913e+06	1.07475e+06	1.3873e+06	1.53392e+06	2.78214e+06	2.49776e+06	1.20258e+06	1.63275e+06	808244	1.86537e+06	776211	1.25711e+06	627579	2.00277e+06	5.95065e+06
M225T759	Clofibrate	225.06	758.7	242.071	14.0673	C12H15ClO3	[M+H-H2O]+	Benzene and substituted derivatives	Phenoxyacetic acid derivatives	C06916		637-07-0	HMDB0014774	BioDeepDB	1	pos	2.6056e+06	291594	2.82065e+06	4.7968e+06	1.6147e+06	3.94854e+06	6.83005e+06	1.52387e+06	3.49219e+06	1.96413e+06	2.0628e+06	2.53931e+06	8.28706e+06	1.06961e+06	2.69979e+06	5.09239e+06	2.03255e+06	1.99964e+06	3.31973e+06	4.93404e+06	5.78745e+06	4.75116e+06	1.27155e+07	1.12188e+07
M282T91	2'-O-Methyladenosine	282.118	90.9		6.73478	C11H16N5O7P(C5H8O6PR)n(C5H8O6PR)n	[M+H]+	Purine nucleosides		C04779		2140-79-6	HMDB0004326	BioDeepDB	1	pos	9.56646e+06	9.14338e+06	9.20299e+06	8.93511e+06	9.22595e+06	1.04938e+07	1.11785e+07	9.30665e+06	9.02662e+06	9.64922e+06	9.24681e+06	8.81638e+06	9.27106e+06	1.00602e+07	9.25191e+06	8.85055e+06	9.17095e+06	8.90037e+06	9.40443e+06	8.4305e+06	9.64462e+06	8.52452e+06	9.94612e+06	9.96929e+06
M357T91	Asp-Asp-OH	357.052	91	356.049	12.2408	C13H12N2O10	[M+H]+							BioDeepDB	1	pos	275289	629581	278544	1.42079e+06	1.32777e+06	1.11348e+06	1.17498e+06	2.48873e+06	1.52778e+06	1.43344e+06	1.12469e+06	1.70218e+06	1.81769e+06	1.0335e+06	776051	764091	754765	272153	216686	1.30383e+06	1.12587e+06	799304	328601	257593
M311T91	Dhurrin	311.101	91.3	311.101	1.92863	C14H17NO7	[M]+	Organooxygen compounds	Carbohydrates and carbohydrate conjugates	C05143	Metabolism of other amino acids; Global and overview maps	499-20-7	HMDB0060471	BioDeepDB	1	pos	722293	881401	1.46463e+06	2.0605e+06	783951	835161	1.35367e+06	3.01393e+06	1.01323e+06	1.11596e+06	1.71658e+06	919772	3.02336e+06	1.07154e+06	1.05623e+06	1.58525e+06	406022	1.28283e+06	1.39995e+06	1.73304e+06	1.0779e+06	1.15778e+06	2.46411e+06	1.82419e+06
M423T92	Neolinustatin	423.172	91.6	423.174	4.96252	C17H29NO11	[M]+	Carbohydrates and carbohydrate conjugates	Glycosyl compounds	C08336		72229-42-6	HMDB0038482	BioDeepDB	1	pos	478114	1.25046e+06	1.25116e+06	397921	1.30063e+06	963346	1.37271e+06	1.25884e+06	1.65382e+06	1.80105e+06	1.8346e+06	1.58928e+06	1.2865e+06	1.28674e+06	1.73583e+06	1.5392e+06	1.71426e+06	1.90809e+06	1.56399e+06	2.27563e+06	1.57968e+06	1.35408e+06	933513	1.55526e+06
M967T94_1	REBAUDIOSIDE A	967.459	94.1	966.431	21.8097	C44H70O23	[M+H]+					58543-16-1		BioDeepDB	1	pos	930223	581133	1.18117e+06	816405	2.2999e+06	1.17234e+06	2.40638e+06	1.99584e+06	2.84118e+06	3.23548e+06	2.92774e+06	2.60193e+06	2.25327e+06	2.12759e+06	2.66397e+06	2.75179e+06	3.05562e+06	2.7271e+06	2.16772e+06	2.73206e+06	2.62306e+06	2.63493e+06	2.81739e+06	2.56341e+06
M656T94_2	Veratridine	656.341	94.3	673.346	3.55608	C36H51NO11	[M+H-H2O]+			C06544		71-62-5		BioDeepDB	1	pos	6.31458e+06	1.27967e+08	1.10822e+07	2.37348e+07	1.81583e+07	2.82165e+07	3.87932e+07	5.04659e+06	6.08902e+07	1.07884e+07	1.02833e+07	1.53231e+07	5.33466e+07	3.92487e+07	7.1076e+07	1.23818e+07	4.43272e+07	4.31363e+07	4.25699e+07	4.0861e+07	7.77255e+06	2.67148e+07	1.26653e+07	4.63525e+06
M788T94_4	DULCOSIDE A	788.405	94.3	788.383	1.80809	C38H60O17	[M-H2O+NH4]+					64432-06-0		BioDeepDB	1	pos	9.9141e+06	1.00746e+07	9.46306e+06	7.92288e+06	1.12414e+07	1.26992e+07	9.11271e+06	7.22936e+06	9.41629e+06	1.73751e+07	1.34692e+07	6.62079e+06	8.66765e+06	9.61402e+06	8.64231e+06	8.20371e+06	1.47095e+06	1.33274e+07	7.44804e+06	1.10496e+06	6.3107e+06	1.92465e+06	4.57337e+06	1.37162e+06
M825T403	Vincristine	825.407	403.4	824.4	0.455533	C46H56N4O10	[M+H]+	Vinca alkaloids		C07204	Biosynthesis of other secondary metabolites; Global and overview maps	57-22-7	HMDB0014681	BioDeepDB	1	pos	481930	536684	518089	450916	517972	371216	519114	470496	391821	623671	726013	495846	496782	420694	781300	504657	989871	424997	608080	653599	194512	785479	860577	472804
M275T97	Acetylvalerenolic acid	275.16	96.9	292.167	0.455212	C17H24O4	[M+H-H2O]+	Prenol lipids	Sesquiterpenoids			81397-67-3	HMDB0035687	BioDeepDB	1	pos	1.37232e+07	1.70368e+07	1.575e+07	1.23745e+07	1.5267e+07	1.87888e+07	1.91047e+07	1.6521e+07	1.52407e+07	1.56684e+07	1.57551e+07	2.05033e+07	1.43406e+07	1.31036e+07	1.35617e+07	1.35717e+07	1.54167e+07	1.48513e+07	1.63026e+07	1.99447e+07	1.98232e+07	1.61486e+07	1.34358e+07	1.55243e+07
M350T105	Cefradine	350.118	105.3	349.11	4.28426	C16H19N3O4S	[M+H]+	Carboxylic acids and derivatives	Amino acids, peptides, and analogues	C06897		38821-53-3	HMDB0015428	BioDeepDB	1	pos	2.19454e+06	1.5125e+06	1.95509e+06	1.28247e+06	1.64035e+06	1.45548e+06	1.4956e+06	1.68205e+06	1.26105e+06	1.50448e+06	1.41984e+06	1.37493e+06	1.88411e+06	1.43039e+06	1.0785e+06	1.92536e+06	1.157e+06	1.23911e+06	1.82622e+06	1.31609e+06	1.32341e+06	1.5204e+06	1.65429e+06	1.37404e+06
M251T690	N-Acetyl-L-tyrosine	251.115	690.4	251.116	1.19467	C13H17NO4	[M]+	Carboxylic acids and derivatives	Amino acids, peptides, and analogues	C01657		537-55-3/840-97-1	HMDB0000866	BioDeepDB	1	pos	177438	216264	504240	192668	204744	392849	233928	158287	267034	438575	264871	490562	271710	376764	990397	421915	259012	578966	579390	309554	270971	340109	353175	224368
M261T798	Carisoprodol	261.181	798.2	260.174	1.5315	C12H24N2O4	[M+H]+	Carboxylic acids and derivatives	Amino acids, peptides, and analogues	C07927		78-44-4	HMDB0014539	BioDeepDB	1	pos	965262	533297	829998	1.10665e+06	798766	809014	501856	1.13392e+06	1.02765e+06	1.82467e+06	918401	1.16673e+06	1.12663e+06	1.04836e+06	1.24929e+06	1.07544e+06	1.52209e+06	1.09667e+06	1.07321e+06	962576	1.28627e+06	1.38692e+06	1.27818e+06	1.45654e+06
M207T397	4-(Methylnitrosamino)-1-(3-pyridyl)-1-butanone	207.103	397.2	207.101	12.0713	C10H13N3O2	[M]+	Organooxygen compounds	Carbonyl compounds	C16453	Xenobiotics biodegradation and metabolism	64091-91-4	HMDB0011603	BioDeepDB	1	pos	8.56795e+06	1.63403e+07	1.17982e+07	8.6804e+06	1.3686e+07	8.10601e+06	1.08817e+07	4.37947e+06	4.90469e+06	2.17011e+07	2.04897e+07	4.60059e+06	1.01023e+06	1.67116e+06	7.32639e+06	5.19745e+06	3.2716e+06	5.39636e+06	3.27391e+06	3.61471e+06	1.58021e+06	4.20409e+06	6.34681e+06	3.44842e+06
M466T99	Temefos	465.99	99.2	465.99	1.50218	C16H20O6P2S3	[M]+			C18809		3383-96-8		BioDeepDB	1	pos	4.94395e+06	3.59207e+06	2.47346e+06	2.81646e+06	3.1386e+06	5.00419e+06	7.58972e+06	2.58856e+06	3.9169e+06	3.63148e+06	5.8611e+06	3.13124e+06	1.89698e+06	1.46891e+06	1.28469e+06	1.77757e+06	894402	1.33825e+06	909775	314404	1.04119e+06	1.05299e+06	190622	1.34807e+06
M450T109_1	CAY10595	450.018	108.6	450.019	1.23363	C20H13Cl2FN2O5	[M]+					916047-16-0		BioDeepDB	1	pos	738185	684354	735639	657314	713525	707523	753193	776487	751126	775859	813201	798190	805508	757828	692450	648707	815118	780636	810898	733287	764327	834644	787913	767444
M160T397_2	D-Alanyl-D-alanine	160.095	397	160.085	9.61401	C6H12N2O3	[M]+	Carboxylic acids and derivatives	Amino acids, peptides, and analogues	C00993	Glycan biosynthesis and metabolism; Global and overview maps; Drug resistance: antimicrobial	923-16-0	HMDB0003459	BioDeepDB	1	pos	284468	266693	369857	1.01843e+06	174817	52803.5	315669	217629	1.67327e+06	4.25796e+06	1.467e+06	1.76689e+06	530873	1.28751e+06	3.67177e+06	1.0494e+06	3.73032e+06	3.72252e+06	2.01997e+06	2.51824e+06	2.8163e+06	3.69899e+06	2.36109e+06	6.13698e+06
M255T612	Sotalol	255.112	612.1	272.12	0.917243	C12H20N2O3S	[M+H-H2O]+	Benzene and substituted derivatives	Sulfanilides	C07309		3930-20-9	HMDB0014632	BioDeepDB	1	pos	182398	296602	1.07466e+06	295340	235044	293535	828238	740723	226192	301061	477476	228174	73963.5	26864.8	457363	55627.3	400006	268777	196156	202212	56815.9	143229	92644.1	107513
M554T99	Ceftriaxone	554.049	99.5	554.046	5.23419	C18H18N8O7S3	[M]+	Lactams	Beta lactams	C06683		73384-59-5	HMDB0015343	BioDeepDB	1	pos	236325	702541	321060	62082.7	580162	597709	226095	709403	361438	720989	418015	687071	273844	716608	304653	534071	112249	737352	84074.1	61250.3	446963	340073	68688.6	378372
M116T100	Tranylcypromine	116.082	99.8	133.089	1.15436	C9H11N	[M+H-H2O]+	Organonitrogen compounds	Amines	C07155		155-09-9/NA	HMDB0014890	BioDeepDB	1	pos	115959	725315	1.38554e+06	697877	942342	1.61995e+06	684322	128501	755719	1.31033e+06	2.133e+06	1.43069e+06	499837	549122	184257	115819	1.43084e+06	766838	103224	79545	858390	580346	1.32598e+06	1.09291e+06
M185T372	1,4-Dimethyl-7-ethylazulene	185.129	371.8	184.125	21.477	C14H16	[M+H]+	Prenol lipids	Sesquiterpenoids	C09633		529-05-5	HMDB0036470	BioDeepDB	1	pos	266570	632706	484288	455476	525031	431516	275729	440562	2.02395e+06	1.97734e+06	1.6083e+06	703321	2.28847e+06	1.07796e+06	1.52131e+06	1.86448e+06	2.27351e+06	4.14537e+06	5.48328e+06	2.78405e+06	4.13362e+06	2.94685e+06	1.80224e+06	2.4778e+06
M702T356_1	Neu5Acalpha2-6Galbeta1-4Glcbeta-Sp	702.246	356.4	702.244	2.52734	C25H42N4O19	[M]+					615554-66-0		BioDeepDB	1	pos	3.13666e+06	2.9727e+06	3.60081e+06	2.9998e+06	4.5476e+06	3.15933e+06	3.72258e+06	2.52555e+06	4.45155e+06	4.49075e+06	4.54557e+06	1.26449e+06	1.24592e+06	2.258e+06	2.09592e+06	3.5657e+06	2.90654e+06	1.70792e+06	3.37038e+06	1.2615e+06	3.94835e+06	1.30973e+06	2.93371e+06	1.91182e+06
M368T785	Perindopril	368.224	784.8	368.231	19.0102	C19H32N2O5	[M]+	Carboxylic acids and derivatives	Amino acids, peptides, and analogues	C07706		107133-36-8/82834-16-0	HMDB0014928	MoNA	1	pos	102527	177553	118136	231925	110124	186921	216708	246601	176174	84385.8	146679	162656	137299	98872.2	264021	109438	313368	182162	204242	148944	51269.9	40428.8	142229	48365.2
M287T562	Salicin	287.114	562.1	286.105	4.61141	C13H18O7	[M+H]+	Organooxygen compounds	Carbohydrates and carbohydrate conjugates	C01451	Carbohydrate metabolism; Membrane transport; Chemical structure transformation maps; Sensory system	138-52-3	HMDB0003546	mzCloud	1	pos	320840	909938	225413	447075	947477	145017	573921	1.12561e+06	140607	256838	501014	980890	241341	1.12858e+06	1.11768e+06	240380	142625	1.02403e+06	222352	1.47724e+06	1.37829e+06	1.32183e+06	476657	264519
M354T621	Flumioxazin	354.1	621.4	354.102	4.23609	C19H15FN2O4	[M]+	Benzoxazines	Benzoxazinones	C11035		103361-09-7	HMDB0034854	BioDeepDB	1	pos	234121	206219	348346	141132	340602	185951	274363	188474	628090	534948	321358	273696	480728	186353	450470	236513	90041.1	164924	293521	534830	717678	535218	538408	476267
M310T356	Diflubenzuron	310.04	356.4	310.032	24.513	C14H9ClF2N2O2	[M]+	Benzene and substituted derivatives	N-phenylureas	C14427		35367-38-5	HMDB0031778	BioDeepDB	1	pos	4.68237e+06	5.86579e+06	5.21243e+06	5.50377e+06	6.68314e+06	1.01828e+06	3.79526e+06	3.6448e+06	7.55917e+06	7.85184e+06	5.61281e+06	4.41013e+06	4.62096e+06	5.06983e+06	995576	4.21472e+06	3.93966e+06	5.53705e+06	3.97769e+06	4.38341e+06	4.76231e+06	3.68512e+06	1.24885e+06	7.91057e+06
M264T608	Nitrazepam	264.07	608.4	281.08	11.2319	C15H11N3O3	[M+H-H2O]+	Benzodiazepines	1,4-benzodiazepines	C07487		146-22-5	HMDB0015534	BioDeepDB	1	pos	449530	489312	545408	453013	173284	383649	307451	423660	582117	286334	348206	968103	527567	226243	434836	233553	603811	606612	261111	672618	494997	750833	436937	1.07092e+06
M205T203	Acetazolamide	204.98	203.3	221.988	5.20052	C4H6N4O3S2	[M+H-H2O]+	Azoles	Thiadiazoles	C06805		59-66-5	HMDB0014957	BioDeepDB	1	pos	244711	2.66017e+06	753905	468993	743321	410541	1.3124e+06	648850	1.18368e+06	1.20578e+06	986856	699638	1.23753e+06	867015	889065	1.63201e+06	442359	2.30902e+06	3.13859e+06	4.142e+06	2.06723e+06	2.77231e+06	1.91463e+06	1.66448e+06
M255T119	NIMUSTINE	255.073	119.5	272.079	5.02862	C9H13ClN6O2	[M+H-H2O]+					42471-28-3		BioDeepDB	1	pos	1.21082e+07	1.79704e+07	8.86664e+06	1.83562e+07	9.42741e+06	7.7649e+06	9.18543e+06	9.19331e+06	1.527e+07	1.66532e+07	1.27097e+07	7.51905e+06	768185	764748	6.5077e+06	665318	1.03652e+06	648975	843525	856525	648822	516280	883036	499940
M438T802	Fluphenazine	438.195	801.7	437.175	28.5809	C22H26F3N3OS	[M+H]+	Benzothiazines	Phenothiazines	C07010		69-23-8	HMDB0014761	BioDeepDB	1	pos	9.61616e+06	5.98291e+06	1.11347e+07	1.15902e+07	4.88731e+06	3.43944e+06	2.31857e+06	2.04301e+06	6.40976e+06	8.91596e+06	5.2515e+06	9.8662e+06	7.07408e+06	2.61094e+06	1.39964e+07	2.18501e+06	7.65554e+06	6.04462e+06	7.24305e+06	2.82147e+06	8.2921e+06	7.27736e+06	6.0397e+06	5.36868e+06
M384T711	Oxacillin	384.092	711	401.104	13.1895	C19H19N3O5S	[M+H-H2O]+	Carboxylic acids and derivatives	Amino acids, peptides, and analogues	C07334		66-79-5	HMDB0014851	BioDeepDB	1	pos	611105	201472	472136	384449	462889	308467	153125	478712	486772	806590	375406	1.18385e+06	597890	629422	616068	229613	705546	396650	776621	730126	447089	431839	966573	573717
M136T105	Homocysteine	136.043	104.8	135.035	0	C4H9NO2S	[M+H]+	Carboxylic acids and derivatives	Amino acids, peptides, and analogues	C05330		454-29-5	HMDB0000742	BioDeepDB	1	pos	243392	210228	947738	254109	233100	250346	244494	238810	264268	930892	1.36302e+06	1.42048e+06	1.01539e+06	956019	2.66348e+06	1.45277e+06	4.44214e+06	2.87539e+06	1.16403e+06	2.28608e+06	1.77321e+06	1.50427e+06	1.89609e+06	3.35337e+06
M249T461	6-Hydroxymelatonin	249.123	460.6	248.116	0	C13H16N2O3	[M+H]+	Indoles and derivatives	Hydroxyindoles	C05643	Amino acid metabolism	2208-41-5	HMDB0004081	BioDeepDB	1	pos	447591	177804	249666	277608	43624	3267.26	263701	110252	444463	463548	391506	206654	255459	70311.4	551706	114697	431712	410686	60248.9	310232	74815.7	160806	72360.2	482566
M593T399	Rutin	593.144	399	610.153	2.97735	C27H30O16	[M+H-H2O]+	Flavonoids	Flavonoid glycosides	C05625	Biosynthesis of other secondary metabolites; Global and overview maps	153-18-4	HMDB0003249	BioDeepDB	1	pos	1.6098e+08	5.50162e+07	8.94862e+07	1.31591e+07	8.47619e+07	1.02044e+08	1.00669e+08	5.07823e+06	1.48054e+08	2.19813e+08	1.85016e+08	2.43495e+08	1.33042e+08	1.19735e+08	1.89656e+08	9.14602e+07	9.20706e+07	1.30157e+08	1.19509e+08	1.27763e+08	1.46379e+08	1.99529e+08	1.91146e+08	2.00689e+08
M139T106	Gentisate aldehyde	139.042	105.9	138.032	23.0146	C7H6O3	[M+H]+	Organooxygen compounds	Carbonyl compounds	C05585	Amino acid metabolism; Global and overview maps	1194-98-5	HMDB0004062	BioDeepDB	1	pos	519038	414361	317918	502230	245058	186206	395465	463678	329925	326519	557296	341460	432837	425601	738449	378149	511440	329798	322315	575917	497966	500558	403135	839676
M417T106	AM679	417.061	106.4	417.059	5.13669	C20H20INO	[M]+					335160-91-3		BioDeepDB	1	pos	127192	819254	48362.9	228063	158762	28574.7	326597	533590	321413	251442	208277	306687	129929	125072	147584	92850.2	546811	106584	106677	344603	119456	452729	917705	154009
M216T712	Atrazine	216.102	711.9	215.094	3.81302	C8H14ClN5	[M+H]+	Fatty Acyls	Fatty amides	C06551	Xenobiotics biodegradation and metabolism; Global and overview maps	608514-56-3/1912-24-9	HMDB0032273	BioDeepDB	1	pos	49803.4	44949.6	55004.1	53649	57653.3	52959.9	92271.7	54210.6	47422.9	44239.7	81358.3	85839.8	46138	81070.3	135466	66519.3	128502	118704	64155.4	119515	46744.4	77197.7	75875.1	100453
M744T108_3	NADP	744.104	108.1	744.083	0.236526	C21H29N7O17P3	[M-H2O+NH4]+	(5'->5')-dinucleotides		C00006	Metabolism of cofactors and vitamins; Metabolism of other amino acids; Endocrine system; Xenobiotics biodegradation and metabolism; Energy metabolism; Global and overview maps	53-59-8	HMDB0000217	BioDeepDB	1	pos	267265	795382	683591	1.35082e+06	707608	834479	634729	446667	471725	756589	228434	502013	415527	479259	1.11916e+06	660932	506822	417187	858259	392895	1.3236e+06	3.55154e+06	3.11172e+06	2.65084e+06
M171T108	Levetiracetam	171.113	108.4	170.106	0.444152	C8H14N2O2	[M+H]+	Carboxylic acids and derivatives	Amino acids, peptides, and analogues	C07841		102767-28-2	HMDB0015333	BioDeepDB	1	pos	4.34451e+06	3.57403e+06	3.9726e+06	4.30067e+06	4.10286e+06	2.88299e+06	3.93523e+06	3.45562e+06	2.61744e+06	1.70947e+06	2.62653e+06	2.91109e+06	1.25984e+06	1.1635e+06	1.76383e+06	1.50729e+06	1.22733e+06	1.74566e+06	1.06121e+06	1.61941e+06	1.14973e+06	1.11574e+06	599552	1.05318e+06
M228T108	Deoxycytidine	228.098	108.5	227.091	0.438408	C9H13N3O4	[M+H]+	Pyrimidine nucleosides	Pyrimidine 2'-deoxyribonucleosides	C00881	Membrane transport; Global and overview maps; Nucleotide metabolism	951-77-9	HMDB0000014	BioDeepDB	1	pos	5.90014e+06	1.11568e+07	8.14595e+06	6.15821e+06	8.16393e+06	1.18826e+07	1.53115e+07	9.69577e+06	6.38378e+06	9.71491e+06	9.19831e+06	1.142e+07	1.48488e+07	6.47938e+06	8.36472e+06	9.47118e+06	1.21685e+07	1.64969e+07	1.17997e+07	8.15959e+06	7.3024e+06	1.2712e+07	3.96177e+06	3.77229e+06
M264T338	Ethidimuron	264.035	338.4	264.035	1.13621	C7H12N4O3S2	[M]+			C19092		30043-49-3		BioDeepDB	1	pos	1.94789e+06	2.84033e+06	1.87375e+06	2.74699e+06	2.83671e+06	2.74661e+06	3.56347e+06	1.73065e+06	1.65699e+06	2.81763e+06	2.28485e+06	1.47611e+06	3.20899e+06	2.45651e+06	2.4278e+06	2.83788e+06	1.98974e+06	1.69224e+06	1.95025e+06	2.50654e+06	2.15253e+06	2.26623e+06	3.07304e+06	2.02986e+06
M141T111	3-Oxovalproic acid	141.085	111.2	158.094	11.0997	C8H14O3	[M+H-H2O]+	Keto acids and derivatives	Short-chain keto acids and derivatives	C16652	Xenobiotics biodegradation and metabolism	60113-81-7	HMDB0060685	BioDeepDB	1	pos	251326	122928	123842	209543	193804	72922.2	108161	238987	155421	468680	340241	343956	321707	313412	113538	635458	272492	339711	134371	206697	264232	199603	570832	333000
M278T112_1	T0070907	278.03	112.5	277.025	8.97328	C12H8ClN3O3	[M+H]+					313516-66-4		BioDeepDB	1	pos	510116	532059	472010	382792	488240	441812	474243	499689	331824	400289	528801	462088	566240	502791	503356	363119	443819	503586	470749	469768	467557	404887	468871	448961
M339T575	Papaverine	339.141	575.2	339.147	19.1661	C20H21NO4	[M]+	Isoquinolines and derivatives	Benzylisoquinolines	C06533	Chemical structure transformation maps; Biosynthesis of other secondary metabolites; Global and overview maps	61-25-6/58-74-2	HMDB0015245	BioDeepDB	1	pos	541062	331856	300185	540150	257891	420107	880791	831503	699007	385186	238916	925677	766910	658693	449301	489010	428101	1.01234e+06	502545	713728	237920	788661	662828	590570
M285T279	Probenecid	285.103	278.9	285.103	2.1045	C13H19NO4S	[M]+	Benzene and substituted derivatives	Benzenesulfonamides	C07372		57-66-9	HMDB0015166	BioDeepDB	1	pos	6.6609e+06	2.01813e+07	1.13197e+07	5.15981e+06	1.54309e+07	8.25826e+06	1.86168e+07	1.19405e+07	1.71503e+07	2.24688e+07	1.74594e+07	8.82499e+06	1.01945e+07	9.90748e+06	1.27082e+07	1.08185e+07	1.4674e+07	1.18473e+07	1.53905e+07	1.21909e+07	1.23815e+07	1.20796e+07	1.24797e+07	1.10495e+07
M324T114_1	Azamethiphos	323.972	114.3	323.974	4.63003	C9H10ClN2O5PS	[M]+			C18702		35575-96-3		BioDeepDB	1	pos	1.77919e+06	538365	2.64874e+06	401422	278103	155462	2.29159e+06	1.78029e+06	3.84665e+06	3.85254e+06	1.83135e+06	3.48646e+06	1.57561e+06	1.72133e+06	2.33492e+06	1.8337e+06	2.02442e+06	3.26893e+06	1.78397e+06	2.59574e+06	3.00856e+06	3.06107e+06	2.189e+06	421852
M330T114	Cephalexin	330.094	114.3	347.094	22.2179	C16H17N3O4S	[M+H-H2O]+	Lactams	Beta lactams	C06895		15686-71-2	HMDB0014707	BioDeepDB	1	pos	949922	931460	1.03222e+06	1.26311e+06	462067	639879	1.02431e+06	1.3365e+06	324422	414993	1.10271e+06	508742	1.91196e+06	1.23351e+06	574853	1.69876e+06	1.20645e+06	765427	599191	715233	1.31272e+06	1.24588e+06	1.50631e+06	699105
M386T839	Sufentanil	386.209	838.7	386.203	15.2767	C22H30N2O2S	[M]+	Benzene and substituted derivatives	Anilides	C08022		56030-54-7	HMDB0014846	mzCloud	1	pos	897366	1.36319e+06	897158	731858	1.48731e+06	927105	939257	1.68282e+06	995543	1.37643e+06	1.59999e+06	1.4915e+06	533491	1.16936e+06	1.47773e+06	1.71068e+06	2.24386e+06	1.94233e+06	2.48647e+06	2.39594e+06	1.43898e+06	1.51423e+06	1.29197e+06	1.51589e+06
M213T115	CHLOROXINE	212.971	114.7	212.975	17.4631	C9H5Cl2NO	[M]+					773-76-2		BioDeepDB	1	pos	739079	451229	661750	853451	871788	788504	195012	839399	476701	676337	920399	609489	744047	918044	784187	840586	822737	643240	800016	635901	813091	196557	918609	748961
M154T115	p-Octopamine	154.086	114.9	153.079	0.648987	C8H11NO2	[M+H]+	Phenols	1-hydroxy-2-unsubstituted benzenoids	C04227	Signaling molecules and interaction	104-14-3	HMDB0004825	BioDeepDB	1	pos	1.44729e+06	1.0173e+06	1.96786e+06	2.20443e+06	1.52071e+06	1.53604e+06	2.00156e+06	2.20821e+06	1.48773e+06	1.29677e+06	2.08585e+06	1.50697e+06	1.40946e+06	759812	1.29266e+06	1.71239e+06	1.63825e+06	2.56133e+06	2.45321e+06	2.70658e+06	1.27181e+06	1.62912e+06	2.08608e+06	1.47205e+06
M305T725	Capsaicin	305.196	725	305.199	9.82975	C18H27NO3	[M]+	Phenols	Methoxyphenols	C06866	Chemical structure transformation maps; Biosynthesis of other secondary metabolites; Global and overview maps; Sensory system	404-86-4	HMDB0002227	BioDeepDB	1	pos	798341	1.24317e+06	1.41202e+06	1.24272e+06	1.62896e+06	1.4501e+06	1.2942e+06	984824	476637	304713	681384	750029	1.51057e+06	975970	299898	1.11469e+06	742501	827855	1.56182e+06	828214	813412	889222	1.13388e+06	386554
M358T118	omega-COOH-tetranor-LTE3	358.024	118.2	375.031	2.32945	C15H16Cl3N3O2	[M+H-H2O]+	Phenol ethers		C11182		67747-09-5	HMDB0062513	BioDeepDB	1	pos	1.63904e+06	1.36756e+06	1.88024e+06	1.67781e+06	1.48189e+06	1.68624e+06	2.05886e+06	1.92861e+06	1.81476e+06	1.7094e+06	2.3455e+06	2.01329e+06	1.31684e+06	1.89142e+06	2.05918e+06	1.73589e+06	2.39496e+06	2.1763e+06	1.82961e+06	2.29427e+06	2.09926e+06	1.79407e+06	2.04488e+06	2.78308e+06
M226T118_1	N-acetyl-2-carboxy Benzenesulfonamide	226.015	118.5	243.02	10.1348	C9H9NO5S	[M+H-H2O]+					849067-18-1		BioDeepDB	1	pos	4.44094e+06	4.39702e+06	5.98393e+06	5.85703e+06	8.16893e+06	2.03107e+06	1.48894e+07	1.01485e+07	8.87985e+06	6.39796e+06	9.22357e+06	1.04698e+07	563565	270239	3.51415e+06	298347	3.25957e+06	491674	2.287e+06	4.62766e+06	500121	501385	230802	215423
M357T119	Chlorsulfuron	357.022	119	357.03	22.6877	C12H12ClN5O4S	[M]+			C05071		64902-72-3		BioDeepDB	1	pos	8.86913e+06	9.29639e+06	6.55007e+06	9.95789e+06	6.1615e+06	5.52267e+06	7.5537e+06	7.61519e+06	1.1961e+06	1.30674e+06	6.05267e+06	803334	918839	1.02153e+06	4.41042e+06	5.04315e+06	1.12315e+06	7.63231e+06	6.97845e+06	1.55817e+06	6.22164e+06	8.49326e+06	5.36976e+06	5.92353e+06
M334T119	PIT-1	334.006	119.1	351.008	14.9093	C14H10ClN3O4S	[M+H-H2O]+					53501-41-0		BioDeepDB	1	pos	4.7912e+06	2.89913e+06	6.26271e+06	3.46917e+06	3.85908e+06	3.75581e+06	3.00193e+06	3.67864e+06	2.42195e+06	3.3598e+06	3.03468e+06	3.496e+06	3.60548e+06	3.15122e+06	3.30439e+06	3.51629e+06	3.94204e+06	5.41136e+06	3.26983e+06	3.26559e+06	3.2453e+06	3.23059e+06	4.15168e+06	2.84378e+06
M697T121_3	Chaetocin	697.112	121	696.095	13.4842	C30H28N6O6S4	[M+H]+					28097-03-2		BioDeepDB	1	pos	1.08153e+06	5.23918e+07	4.76707e+07	766753	983916	2.23653e+06	1.72969e+07	1.27871e+07	4.01287e+07	586933	1.63755e+07	2.50834e+07	3.18281e+06	4.42647e+07	1.31486e+07	9.89772e+06	2.02898e+06	1.38332e+07	1.30192e+07	4.6642e+07	3.92801e+07	1.1631e+07	2.96467e+07	1.29376e+07
M148T99_1	4-Hydroxyisoleucine	148.097	99.4	147.09	0.138763	C6H13NO3	[M+H]+					55399-93-4		BioDeepDB	1	pos	568053	701306	549752	843386	652593	528731	1.42667e+06	574443	719091	698840	676733	1.85716e+06	2.88137e+06	2.3945e+06	3.36761e+06	2.71334e+06	4.14561e+06	2.75146e+06	3.5771e+06	4.85854e+06	4.7859e+06	4.784e+06	3.06361e+06	2.83348e+06
M298T344	Trimeprazine	298.151	343.5	298.15	1.677	C18H22N2S	[M]+	Benzothiazines	Phenothiazines	C07172		84-96-8	HMDB0015376	BioDeepDB	1	pos	1.22626e+06	300399	505844	1.02659e+06	615982	1.63602e+06	634069	672366	461888	669407	536265	311016	177405	274641	355131	1.59367e+06	944990	572581	331796	539383	255858	264627	472426	399692
M656T536_2	Teniposide	656.16	535.6	656.156	5.33407	C32H32O13S	[M]+	Lignan lactones	Podophyllotoxins	C11153		29767-20-2	HMDB0014587	BioDeepDB	1	pos	413449	418569	393725	415475	256178	116788	72684.5	139822	88801.5	44922.4	81300.3	260169	187032	28843.1	213016	139347	54807.2	56508.3	322788	180086	112734	336352	99932.9	71528.1
M182T460	Pyridostigmine	182.105	460.4	181.098	0.131792	C9H13N2O2	[M+H]+	Pyridines and derivatives	Methylpyridines	C07410		155-97-5	HMDB0014685	BioDeepDB	1	pos	278777	39177.5	727.092	1.47144e+06	1.28608e+06	1.32708e+06	23066.9	898.312	20557.9	1.12016e+06	852.593	4268.05	1.20817e+06	27062.1	35138.7	1.68876e+06	1.47101e+06	944.712	732.418	28706.8	24794.2	28967.5	33760.9	26522
M287T322	Diazinon	287.088	322.4	304.101	20.0844	C12H21N2O3PS	[M+H-H2O]+	Organic thiophosphoric acids and derivatives	Thiophosphoric acid esters	C14324		333-41-5	HMDB0032943	BioDeepDB	1	pos	689006	775706	594028	602657	634575	341145	492534	597850	555215	720734	378853	430390	649505	579233	649013	500234	432395	458599	457208	495804	510118	526686	646220	362855
M110T122	1,3-Benzenediol	110.035	121.9	110.037	18.1761	C6H6O2	[M]+	Benzene and substituted derivatives	Phenols and derivatives	C01751	Xenobiotics biodegradation and metabolism; Global and overview maps	108-46-3	HMDB0032037	BioDeepDB	1	pos	2.69724e+06	8.4068e+06	6.24351e+06	7.11432e+06	4.35287e+06	785538	1.25185e+07	8.11327e+06	4.82967e+06	1.5195e+06	6.47112e+06	4.95702e+06	6.10057e+06	711604	1.10939e+07	1.4635e+06	1.29969e+07	8.71592e+06	1.61011e+06	9.55679e+06	5.75233e+06	6.76819e+06	1.50354e+06	4.99779e+06
M125T122	Guaiacol	125.06	121.9	124.052	0	C7H8O2	[M+H]+	Phenols	Methoxyphenols	C15572		90-05-1	HMDB0001398	BioDeepDB	1	pos	8.21324e+06	7.28908e+06	8.52531e+06	3.71169e+06	7.46737e+06	3.552e+06	8.43386e+06	4.00125e+06	1.00324e+07	1.50718e+07	5.89022e+06	8.86173e+06	5.78743e+06	8.23871e+06	9.60819e+06	1.11784e+07	5.7587e+06	8.71768e+06	1.00603e+07	6.13903e+06	6.92044e+06	6.41565e+06	1.08629e+07	1.93159e+07
M203T122	(-)-alpha-Curcumene	203.183	121.9	202.172	18.8204	C15H22	[M+H]+	Prenol lipids	Sesquiterpenoids	C09649		4176-17-4	HMDB0061838	BioDeepDB	1	pos	2.35877e+07	1.85763e+07	2.03171e+07	2.23484e+07	2.137e+07	1.50967e+07	3.209e+07	1.77455e+07	1.85134e+07	1.77636e+07	3.36731e+07	1.86461e+07	8.97018e+07	4.49041e+07	4.83508e+07	4.8928e+07	6.88403e+07	4.27341e+07	5.70565e+07	4.98355e+07	6.37795e+07	4.95421e+07	2.64752e+07	1.8016e+07
M357T122	Farnesyl Thiosalicylic Acid Amide	357.21	122.2	357.213	6.53848	C22H31NOS	[M]+					1092521-74-8		BioDeepDB	1	pos	5.55814e+07	5.14459e+07	5.23493e+07	6.32878e+07	5.51077e+07	5.59945e+07	5.12216e+07	5.60647e+07	5.4726e+07	5.41478e+07	6.57263e+07	5.96147e+07	5.04693e+07	5.08305e+07	6.53435e+07	4.2777e+07	5.45115e+07	2.16085e+07	5.82321e+07	4.99652e+07	6.3516e+07	5.4941e+07	5.97323e+07	5.54746e+07
M121T133	Benzamide	121.051	133.5	121.053	15.6959	C7H7NO	[M]+	Benzene and substituted derivatives	Benzoic acids and derivatives	C09815	Xenobiotics biodegradation and metabolism; Global and overview maps	55-21-0	HMDB0004461	BioDeepDB	1	pos	1.05325e+06	1.89619e+06	1.56006e+06	1.35664e+06	218193	540871	1.55477e+06	1.41651e+06	1.17194e+06	661314	695570	588514	159247	281673	1.25036e+06	827993	529624	388667	1.32445e+06	928467	938927	976528	1.37991e+06	1.18273e+06
M406T125	Cephapirin	406.059	125.1	423.056	26.1883	C17H17N3O6S2	[M+H-H2O]+	Carboxylic acids and derivatives	Amino acids, peptides, and analogues	C06896		21593-23-7	HMDB0015270	BioDeepDB	1	pos	1.14077e+06	1.24204e+06	1.17642e+06	1.17149e+06	1.1535e+06	1.08683e+06	1.53296e+06	1.40191e+06	1.29928e+06	1.10527e+06	1.21271e+06	1.35621e+06	1.40471e+06	1.28489e+06	1.60235e+06	1.45435e+06	1.83575e+06	1.57635e+06	1.40697e+06	1.59992e+06	1.60748e+06	1.58997e+06	1.39252e+06	1.8545e+06
M213T137	Carmustine	213.007	137	213.007	0.938935	C5H9Cl2N3O2	[M]+	Organic carbonic acids and derivatives	Ureas	C06873		154-93-8	HMDB0014407	BioDeepDB	1	pos	341212	243066	354249	314947	459129	191311	452720	271910	1.03277e+06	1.483e+06	647203	702369	314425	395758	759549	318301	815769	432491	817359	528706	873604	725194	656935	660397
M317T137	(R)-Bromoenol lactone	317.015	137	316.01	5.89169	C16H13BrO2	[M+H]+					478288-90-3		BioDeepDB	1	pos	1.65234e+06	326253	2.34138e+06	1.51905e+06	2.19697e+06	3.23835e+06	2.09745e+06	1.63234e+06	1.19924e+06	2.07648e+06	1.74384e+06	1.79001e+06	1.8963e+06	1.72502e+06	1.12073e+06	1.78057e+06	2.04929e+06	1.54047e+06	1.96515e+06	1.63568e+06	1.81784e+06	1.53549e+06	1.70852e+06	1.04524e+06
M215T137	Diuron	215.003	137.1	232.017	29.6089	C9H10Cl2N2O	[M+H-H2O]+			C18428		330-54-1		BioDeepDB	1	pos	7.57316e+06	7.20765e+06	8.75842e+06	9.39457e+06	7.12498e+06	4.38946e+06	6.72878e+06	8.22203e+06	5.38724e+06	9.10464e+06	6.11232e+06	8.24221e+06	5.40491e+06	4.8961e+06	8.5419e+06	6.83934e+06	1.09122e+07	7.06301e+06	8.16196e+06	9.53461e+06	7.82722e+06	6.97091e+06	9.84461e+06	7.14958e+06
M434T138	Halosulfuron-methyl	434.031	138.4	434.041	23.9614	C13H15ClN6O7S	[M]+	Azoles	Pyrazoles	C18442		100784-20-1	HMDB0034859	BioDeepDB	1	pos	1.98157e+06	8.84722e+06	7.37345e+06	5.18017e+06	7.74486e+06	4.17523e+06	7.32598e+06	8.02938e+06	1.04708e+07	1.05299e+07	8.77187e+06	9.48613e+06	1.37465e+06	3.26587e+06	5.9215e+06	4.442e+06	6.87374e+06	4.64824e+06	6.76713e+06	6.86733e+06	5.44758e+06	4.3502e+06	4.05221e+06	3.19549e+06
M421T392_3	YM-58483	421.044	391.9	421.043	1.90038	C15H9F6N5OS	[M]+					223499-30-7		BioDeepDB	1	pos	3.11217e+07	7.2278e+06	5.21491e+06	3.14992e+07	2.07748e+07	1.4364e+07	4.77619e+06	4.61272e+06	4.3166e+06	1.56956e+07	4.38605e+06	3.8813e+06	1.05684e+07	5.09294e+06	5.09512e+06	6.96129e+06	1.98193e+07	4.33788e+06	5.04616e+06	4.17773e+06	4.07647e+06	3.92733e+06	4.98012e+06	2.31726e+06
M513T145	PU-H71	513.058	145.4	512.049	3.28607	C18H21IN6O2S	[M+H]+					1202865-65-3		BioDeepDB	1	pos	1.48358e+06	964560	1.62279e+06	509960	1.41975e+06	1.11033e+06	2.16505e+06	1.82166e+06	1.89414e+06	460218	325034	1.08321e+06	1.75222e+06	1.88021e+06	2.35734e+06	1.96379e+06	524925	2.41085e+06	1.9353e+06	2.34299e+06	1.57672e+06	1.53901e+06	370795	369359
M569T147	Amarogentin	569.162	147.2	586.169	1.64101	C29H30O13	[M+H-H2O]+			C09767		21018-84-8		BioDeepDB	1	pos	664515	5.99028e+06	4.27264e+06	1.07111e+06	354020	370469	1.6254e+06	5.93939e+06	6.56111e+06	251810	7.30981e+06	2.9559e+06	1.13586e+06	4.92182e+06	5.10763e+06	350134	1.13379e+06	5.33703e+06	5.88102e+06	8.05161e+06	4.62329e+06	6.51499e+06	5.71426e+06	4.13926e+06
M331T280	Furosemide	331.015	279.9	330.008	0.531698	C12H11ClN2O5S	[M+H]+	Benzene and substituted derivatives	Benzenesulfonamides	C07017		54-31-9	HMDB0001933	BioDeepDB	1	pos	7.75048e+06	1.67655e+07	1.38583e+07	6.36089e+06	7.69501e+06	5.59961e+06	7.26941e+06	6.55284e+06	9.60442e+06	8.57667e+06	8.83885e+06	8.3384e+06	8.17749e+06	8.34314e+06	9.22101e+06	8.53156e+06	9.34318e+06	1.27113e+07	1.58746e+07	1.18231e+07	1.28198e+07	2.32188e+07	6.6368e+06	8.87328e+06
M224T151	BRETYLIUM	224.039	151.3	241.047	2.54242	C11H16BrN	[M+H-H2O]+					61-75-6		BioDeepDB	1	pos	9.33804e+06	3.63201e+06	6.15253e+06	8.15395e+06	7.3672e+06	1.82681e+06	5.20735e+06	3.5333e+06	5.59802e+06	3.34282e+06	6.06208e+06	2.34465e+06	2.15742e+06	1.97709e+06	5.72191e+06	2.64631e+06	3.29412e+06	3.00869e+06	3.04547e+06	4.26311e+06	1.86191e+06	2.40406e+06	1.52786e+06	203184
M460T155	Barbamide	460.056	154.9	460.055	3.26047	C20H23Cl3N2O2S	[M]+			C15693				BioDeepDB	1	pos	1.09367e+06	814898	1.65386e+06	1.63237e+06	1.50652e+06	505434	3.11669e+06	1.46968e+06	1.41284e+06	1.12521e+06	1.20002e+06	1.7791e+06	962203	794061	1.89401e+06	793017	2.09784e+06	1.05495e+06	814188	3.59071e+06	1.76837e+06	1.92291e+06	2.24714e+06	2.09556e+06
M488T155	Phe4Cl-Phe4Cl-OH	488.051	155	488.054	6.33485	C23H18Cl2N2O6	[M]+							BioDeepDB	1	pos	642321	982520	850159	582661	816926	744784	409961	710015	621884	750880	1.00411e+06	593177	801593	906518	481919	1.17366e+06	23928.9	522337	799237	329531	549314	270014	693445	554367
M279T429	2-C-Methyl-D-erythritol 2,4-cyclodiphosphate	279.007	429	277.996	12.6305	C5H12O9P2	[M+H]+			C11453	Global and overview maps; Metabolism of terpenoids and polyketides	143488-44-2		BioDeepDB	1	pos	549979	113538	549907	217196	407462	784932	857634	807751	667346	241416	781979	406618	326930	322156	437492	511651	70296.9	325412	59494.3	41442.2	255788	62563.8	357407	436967
M383T690	Prazosin	383.157	690.4	383.159	7.04673	C19H21N5O4	[M]+	Diazinanes	Piperazines	C07368		19216-56-9	HMDB0014600	BioDeepDB	1	pos	1.13066e+07	5.25479e+06	9.39167e+06	6.55495e+06	9.50267e+06	9.32735e+06	1.01675e+07	6.64416e+06	7.51497e+06	1.15781e+07	6.58179e+06	7.39064e+06	7.35846e+06	1.53784e+07	7.98096e+06	6.33914e+06	1.42512e+07	1.22412e+07	9.19323e+06	7.35437e+06	5.34722e+06	8.95607e+06	7.01125e+06	5.58546e+06
M315T179	Spectinomycin	315.149	179	332.158	6.87294	C14H24N2O7	[M+H-H2O]+	Dioxanes	1,4-dioxanes	C02078		1695-77-8	HMDB0015055	BioDeepDB	1	pos	1.1648e+07	1.55819e+07	3.17908e+07	2.31295e+06	3.08738e+07	2.23898e+07	3.3204e+07	1.9122e+07	9.65616e+06	900105	1.25009e+07	9.51107e+06	2.53464e+07	958120	1.16813e+07	3.65733e+07	1.48349e+06	4.07135e+07	2.03994e+07	7.90938e+06	9.09884e+06	9.84957e+06	1.0499e+07	1.18022e+07
M266T548	Practolol	266.159	548.4	266.163	13.9014	C14H22N2O3	[M]+	Benzene and substituted derivatives	Anilides	C11696		6673-35-4	HMDB0015411	BioDeepDB	1	pos	1.43432e+06	386408	1.55575e+06	1.49413e+06	483852	588326	1.53381e+06	1.30314e+06	1.44307e+06	3.0688e+06	1.02353e+06	2.01866e+06	1.3299e+06	1.56284e+06	810919	451045	832233	1.34432e+06	645650	642241	1.11409e+06	1.02464e+06	379750	3.0487e+06
M280T191	5-bromo-3-cyclohexyl-2-hydroxybenzamide	280.029	191.4	297.036	0.687757	C13H16BrNO2	[M+H-H2O]+							BioDeepDB	1	pos	1.26419e+06	1.09084e+06	1.06768e+06	1.32932e+06	1.67503e+06	1.3411e+06	1.13347e+06	1.82947e+06	884690	1.45232e+06	1.07099e+06	1.28246e+06	932343	868829	1.17482e+06	1.13495e+06	836355	1.126e+06	1.1956e+06	854434	1.0704e+06	1.16455e+06	930312	1.35324e+06
M389T194_2	Zopiclone	389.109	193.6	388.105	8.48091	C17H17ClN6O3	[M+H]+			C12808		43200-80-2		BioDeepDB	1	pos	1.36167e+06	7.00064e+06	3.6104e+06	5.61898e+06	1.50808e+06	2.1581e+06	1.57407e+06	6.33251e+06	5.98309e+06	2.98691e+06	1.08849e+07	6.41584e+06	2.97632e+06	6.88658e+06	4.98832e+06	3.31625e+06	3.40304e+06	2.20951e+06	2.60286e+06	3.43279e+06	2.85259e+06	4.20176e+06	3.12962e+06	4.1526e+06
M272T200	Arbutin	272.089	199.7	272.09	4.0428	C12H16O7	[M]+	Organooxygen compounds	Carbohydrates and carbohydrate conjugates	C06186	Carbohydrate metabolism; Membrane transport	497-76-7	HMDB0029943	BioDeepDB	1	pos	419536	426552	344375	407857	315820	228162	375451	393062	399056	685500	465464	535611	690741	306846	786546	300347	640856	770732	589028	484121	468620	488967	426584	437512
M211T203	Thiolutin	210.992	203	228.003	13.673	C8H8N2O2S2	[M+H-H2O]+	Organonitrogen compounds	N-arylamides			87-11-6	HMDB0034228	BioDeepDB	1	pos	871174	901200	858660	665171	1.06925e+06	1.34282e+06	230125	966528	1.13531e+06	227345	1.37743e+06	625777	1.08689e+06	1.16928e+06	189318	924632	714624	684982	890306	226709	696600	201287	1.28594e+06	178221
M271T203	Sulfamethizole	271.029	203	270.024	10.6114	C9H10N4O2S2	[M+H]+	Benzene and substituted derivatives	Benzenesulfonamides	C08050		144-82-1	HMDB0014715	BioDeepDB	1	pos	3.27152e+06	5.88357e+06	887826	7.98662e+06	3.07622e+06	2.16505e+06	3.10294e+06	996337	2.55878e+06	2.87512e+06	3.23873e+06	2.98011e+06	449106	2.37229e+06	2.8191e+06	2.06682e+06	1.17965e+06	1.83318e+06	1.06657e+06	1.56649e+06	1.14886e+06	936778	1.66512e+06	2.396e+06
M293T203	CAY10526	292.925	203	309.93	7.19152	C12H7BrO3S	[M+H-H2O]+							BioDeepDB	1	pos	4.7907e+06	716332	1.09645e+06	5.00763e+06	786228	6.51355e+06	1.33956e+06	1.21915e+06	3.12216e+06	3.07135e+06	656530	1.3083e+06	885815	2.15545e+06	734527	2.6725e+06	2.1026e+06	565024	2.077e+06	2.14908e+06	2.43409e+06	2.25331e+06	2.10988e+06	2.07587e+06
M247T327	(S)-Abscisic acid	247.129	326.9	264.136	0.542227	C15H20O4	[M+H-H2O]+	Prenol lipids	Sesquiterpenoids	C06082	Chemical structure transformation maps; Signal transduction; Global and overview maps; Metabolism of terpenoids and polyketides	21293-29-8	HMDB0035140	BioDeepDB	1	pos	904216	1.27253e+06	1.34413e+06	716349	1.28341e+06	871657	727944	1.22337e+06	998613	1.32467e+06	1.00792e+06	745994	1.23497e+06	552216	656538	829708	1.18809e+06	1.52419e+06	1.74428e+06	1.24959e+06	1.31375e+06	762893	1.63055e+06	959155
M262T557	Sibutramine	262.165	557.4	279.175	12.0764	C17H26ClN	[M+H-H2O]+	Benzene and substituted derivatives	Halobenzenes	C07247		106650-56-0/84485-00-7	HMDB0015237	BioDeepDB	1	pos	1.47542e+06	1.468e+06	937554	628516	2.11019e+06	428055	1.69126e+06	911047	2.89733e+06	1.62741e+06	3.05057e+06	1.04718e+06	675421	3.45992e+06	778419	2.87272e+06	2.63039e+06	5.57148e+06	4.37839e+06	3.22602e+06	2.34645e+06	2.74911e+06	3.05207e+06	3.40721e+06
M242T241	3',5'-Dichloro-2-hydroxy-2-methylbut-3-enanilide	242.011	240.9	259.017	5.51216	C11H11Cl2NO2	[M+H-H2O]+			C14207		83792-61-4		BioDeepDB	1	pos	69795.7	248946	625397	75022	91034.9	81136.8	644541	560296	502746	64229.2	161975	389495	199222	127745	518247	64341.2	66952.3	591901	573089	532695	531356	481231	598551	575234
M363T260	Econazole	363.012	260.1	380.025	14.2309	C18H15Cl3N2O	[M+H-H2O]+	Benzene and substituted derivatives	Benzylethers	C08068		27220-47-9	HMDB0015259	BioDeepDB	1	pos	3.65879e+06	1.60705e+06	2.17224e+06	1.63059e+06	4.02864e+06	3.52742e+06	2.07798e+06	3.02962e+06	1.36275e+06	2.49691e+06	4.80233e+06	4.02684e+06	4.11527e+06	2.19907e+06	5.99373e+06	6.27736e+06	3.87507e+06	3.25429e+06	5.84739e+06	2.95215e+06	1.32879e+06	4.74685e+06	1.82982e+06	1.45092e+06
M332T268	Arachidonic acid ethyl ester	332.271	268.4	332.272	0.692205	C22H36O2	[M]+					1808-26-0		BioDeepDB	1	pos	3.16502e+06	7.9587e+06	7.94681e+06	1.83703e+06	1.9058e+06	3.4112e+06	2.03331e+06	3.45185e+06	5.76149e+06	1.78258e+06	4.67568e+06	878805	1.74854e+06	1.04841e+06	2.01367e+06	2.95776e+06	1.75531e+06	7.339e+06	9.20157e+06	8.06025e+06	1.0138e+07	3.92072e+06	8.42189e+06	6.17631e+06
M370T280	dCDP	370.014	279.9	387.023	4.50253	C9H15N3O10P2	[M+H-H2O]+	Organic oxoanionic compounds	Organic pyrophosphates	C00705	Global and overview maps; Nucleotide metabolism	800-73-7	HMDB0001245	BioDeepDB	1	pos	2.14312e+06	1.36734e+06	2.10926e+06	2.06858e+06	1.88447e+06	1.809e+06	1.56911e+06	1.85896e+06	1.55513e+06	1.68141e+06	1.92056e+06	1.6667e+06	2.00808e+06	1.65252e+06	1.82884e+06	1.5359e+06	1.94244e+06	1.31211e+06	1.98166e+06	1.98411e+06	1.63133e+06	1.63815e+06	1.61004e+06	1.76667e+06
M832T280_2	Pyrrophenone	832.217	280.3	849.214	11.9739	C49H37F2N3O5S2	[M+H-H2O]+					341973-06-6		BioDeepDB	1	pos	1.28391e+06	4.38763e+06	526584	732728	284690	280360	700490	368350	355666	2.69527e+06	3.06932e+06	259300	251179	317435	1.03038e+06	239804	1.96838e+06	487729	406570	781840	892048	848425	708117	522149
M168T302	2-Fluoromethamphetamine	168.123	302.2	167.111	28.5288	C10H14FN	[M+H]+							BioDeepDB	1	pos	370502	464586	370715	507441	1.05494e+06	371136	491979	344355	336221	358992	691227	955236	766071	669283	351683	929583	265325	208283	514050	216833	662623	244493	679661	80773
M421T307	Odontoside; Protocatechuoyl calleryanin	421.109	306.7	438.116	0.171452	C20H22O11	[M+H-H2O]+							BioDeepDB	1	pos	211140	136938	110752	402941	157612	92125	163973	99728.3	296200	480959	246499	210307	221099	351136	284255	275712	204396	136460	185590	124260	146414	222907	446909	756185
M115T377	(S)-5-Hydroxymethyl-2[5H]-furanone	115.039	377.3	114.032	0.608994	C5H6O3	[M+H]+							BioDeepDB	1	pos	730176	751021	724906	721929	845133	751541	1.01073e+06	817182	1.01554e+06	1.13745e+06	910759	716610	683150	715927	769649	744621	726805	755651	719660	634047	937878	889381	785831	754490
M404T310	Asn-Phe4Cl-OH	404.065	310	421.068	11.029	C18H16ClN3O7	[M+H-H2O]+							BioDeepDB	1	pos	1.04762e+06	489.257	505.978	1.73802e+06	1.37763e+06	795085	470.499	257.341	223.302	1.54003e+06	742.228	54411.7	1.31845e+06	387.498	207.725	1.61923e+06	1.09719e+06	658.776	598.708	520.615	550.525	689.891	259.23	463.648
M142T485	Pelletierine	142.123	485	141.115	0.872485	C8H15NO	[M+H]+	Piperidines		C06182	Chemical structure transformation maps; Biosynthesis of other secondary metabolites; Global and overview maps	539-00-4/4396-01-4	HMDB0030325	BioDeepDB	1	pos	457321	112106	135468	132594	253116	451761	114690	113353	602853	162136	597920	428808	156800	136094	357685	205352	142876	308494	175158	144487	204634	639898	151395	484004
M188T485	L-Targinine	188.128	484.9	188.127	4.25242	C7H16N4O2	[M]+	Carboxylic acids and derivatives	Amino acids, peptides, and analogues	C03884		17035-90-4/NA	HMDB0029416	BioDeepDB	1	pos	4.3466e+06	7.14045e+06	5.26249e+06	6.60188e+06	6.49073e+06	6.99637e+06	5.41939e+06	2.91136e+07	4.28848e+06	3.67281e+06	4.89424e+06	5.31232e+06	5.88098e+06	4.13107e+06	6.92359e+06	3.27441e+06	2.83329e+06	7.15933e+06	5.42261e+06	5.25027e+06	1.98299e+06	4.93915e+06	5.86977e+06	5.51369e+06
M933T312_2	REBAUDIOSIDE C	933.431	311.9	950.436	3.17118	C44H70O22	[M+H-H2O]+					63550-99-2		BioDeepDB	1	pos	939887	72088.7	933424	1.11248e+06	2.50012e+06	478274	1.67629e+06	1.07532e+06	1.30358e+06	1.6518e+06	801625	1.07096e+06	862330	729388	960052	1.28081e+06	3.15876e+06	921135	1.08316e+06	2.3532e+06	2.0836e+06	1.94752e+06	1.89181e+06	1.03083e+06
M235T392	Cimetidine	235.108	391.6	252.116	1.55673	C10H16N6S	[M+H-H2O]+	Azoles	Imidazoles	C06952		51481-61-9	HMDB0014644	BioDeepDB	1	pos	1.34281e+06	1.14495e+06	883801	1.2995e+06	1.60363e+06	598267	1.32922e+06	1.40723e+06	875372	1.21072e+06	1.7656e+06	2.38002e+06	836560	1.16559e+06	1.05978e+06	863842	709835	985891	527714	746237	981176	1.08138e+06	1.15206e+06	2.31633e+06
M371T642	Trimethobenzamide	371.198	641.7	388.2	15.9861	C21H28N2O5	[M+H-H2O]+	Benzene and substituted derivatives	Benzoic acids and derivatives	C07178		138-56-7	HMDB0014800	BioDeepDB	1	pos	1.09636e+06	1.76918e+07	5.95192e+06	5.47817e+06	2.50355e+06	2.50044e+06	1.0844e+07	3.79816e+06	7.27896e+06	1.23638e+06	5.88855e+06	3.68702e+06	1.99377e+06	5.68734e+06	8.03446e+06	2.65692e+06	1.66549e+06	7.50397e+06	6.04299e+06	8.09368e+06	5.8907e+06	6.33213e+06	4.62554e+06	9.35725e+06
M300T324	Piplartine	300.119	324.2	317.126	0.44649	C17H19NO5	[M+H-H2O]+	Cinnamic acids and derivatives		C10166		20069-09-4	HMDB0030341	BioDeepDB	1	pos	1.16085e+06	109732	86852.8	1.45268e+06	1.44044e+06	1.34528e+06	74097.4	84836.7	76733.2	893410	72131.1	82080.3	1.14894e+06	70111.7	76665.2	1.65146e+06	1.42781e+06	85471	88379.5	71165	71609.7	66412.9	64900.2	76844.4
M356T694	Amodiaquine	356.151	694	355.145	3.86353	C20H22ClN3O	[M+H]+	Quinolines and derivatives	Aminoquinolines and derivatives	C07626		86-42-0	HMDB0014751	BioDeepDB	1	pos	525463	377350	385717	439163	360995	466733	355179	862401	769078	521923	619339	409675	478388	232283	522491	546804	300118	600583	610675	313803	537524	862995	731334	223875
M237T332	10-Hydroxycarbazepine	237.098	331.5	254.106	0.986932	C15H14N2O2	[M+H-H2O]+	Benzazepines	Dibenzazepines	C07493	Chronology: Nervous system agents; Xenobiotics biodegradation and metabolism	29331-92-8	HMDB0060676	BioDeepDB	1	pos	760752	136908	424529	804497	625494	572031	92668.5	321390	761011	488531	864039	559661	636392	575650	392376	1.11718e+06	723516	1.00881e+06	1.48656e+06	945508	905530	966087	572514	152566
M150T84_2	7-Methyladenine	150.076	83.6	149.07	0.0552291	C6H7N5	[M+H]+	Imidazopyrimidines	Purines and purine derivatives	C02241		935-69-3	HMDB0011614	BioDeepDB	1	pos	2.0598e+06	6.41398e+06	6.37702e+06	2.371e+06	6.01921e+06	6.79547e+06	5.88486e+06	7.12861e+06	6.26122e+06	5.74547e+06	5.90312e+06	6.33952e+06	6.25209e+06	7.18247e+06	6.36292e+06	5.98773e+06	5.77377e+06	5.62304e+06	5.65661e+06	5.77226e+06	5.69637e+06	5.45174e+06	5.7136e+06	6.16295e+06
M320T711	Chloroquine	320.189	710.9	319.182	0.23736	C18H26ClN3	[M+H]+	Quinolines and derivatives	Aminoquinolines and derivatives	C07625		54-05-7	HMDB0014746	BioDeepDB	1	pos	344317	272249	503199	829552	483408	500074	331735	412621	1.11597e+06	789933	880401	1.04121e+06	421436	394194	568125	218755	960637	380879	694692	894772	813184	625322	513273	948699
M260T734	Maprotiline	260.176	733.9	277.183	1.6681	C20H23N	[M+H-H2O]+	Anthracenes		C07107		10262-69-8	HMDB0015069	BioDeepDB	1	pos	419837	96725.2	508404	505989	291029	167084	647980	469334	297994	476640	811783	231006	193041	431135	392163	189800	176391	188020	378219	220101	151588	394184	132894	175628
M389T347	Met-Met-OH	389.072	347.2	388.076	29.4387	C15H20N2O6S2	[M+H]+							BioDeepDB	1	pos	4.00557e+06	798406	2.43861e+06	1.8972e+06	1.47206e+06	3.04105e+06	1.26241e+06	2.55537e+06	2.41488e+06	4.44846e+06	1.15763e+06	892920	2.52314e+06	1.80987e+06	986813	2.60369e+06	1.18545e+06	1.83566e+06	1.24249e+06	2.53005e+06	1.77005e+06	3.45324e+06	2.23779e+06	2.54638e+06
M362T708	Fumitremorgin C	362.184	707.8	379.19	5.6389	C22H25N3O3	[M+H-H2O]+					118974-02-0		BioDeepDB	1	pos	527565	386835	598247	16690.5	182926	203252	658996	947229	508872	40272.7	642082	1.30297e+06	649932	1.43218e+06	1.02586e+06	701430	530409	1.67974e+06	592528	731975	755406	807319	924286	1.23769e+06
M449T353	(2S)-OMPT	449.246	352.8	466.252	4.31228	C22H43O6PS	[M+H-H2O]+							BioDeepDB	1	pos	2.22525e+06	556430	1.2325e+06	3.00108e+06	492704	68133.7	1.49211e+06	743720	2.54697e+06	638643	1.29741e+06	963537	684796	1.10045e+06	949456	943359	1.3002e+06	973282	1.09606e+06	223061	424277	292712	695245	2.61195e+06
M320T704	Danazol	320.199	703.9	337.204	6.66461	C22H27NO2	[M+H-H2O]+	Steroids and steroid derivatives	Estrane steroids	C06938		17230-88-5	HMDB0002835	BioDeepDB	1	pos	185982	82947.9	404366	587476	146494	83597.8	406108	228785	251208	415070	161773	323000	194730	196845	949379	399582	85885.2	508268	345618	435822	447166	147225	116683	243435
M700T356_1	N-dodecanoyl-L-Homoserine lactone-3-hydrazone-fluorescein	700.253	356.4	700.257	5.97637	C37H40N4O8S	[M]+							BioDeepDB	1	pos	135035	128593	99378.8	78811	100170	52849.8	124870	128508	109141	155973	130280	118912	156235	63008.1	90844.3	150116	148498	118579	204449	137481	128937	147716	203946	90330.4
M704T356_1	Itraconazole	704.249	356.4	704.239	13.0534	C35H38Cl2N8O4	[M]+			C07060		84625-61-6		BioDeepDB	1	pos	329397	224100	515362	371658	314605	635819	417301	335969	284275	405077	685768	388357	259197	456858	45265.8	334268	448260	476401	126170	164598	302954	348851	174737	295394
M283T570	Diosmetin	283.049	569.8	300.063	24.2573	C16H12O6	[M+H-H2O]+	Flavonoids	O-methylated flavonoids	C10038		520-34-3	HMDB0029676	mzCloud	1	pos	371841	455472	651695	448614	971249	936563	791687	338758	167332	538983	434585	319982	870351	770218	164663	559965	708275	561255	589067	602738	480243	603452	917662	325638
M439T753	Quinapril	439.228	752.6	438.216	12.8043	C25H30N2O5	[M+H]+	Carboxylic acids and derivatives	Amino acids, peptides, and analogues	C07398		85441-61-8	HMDB0015019	BioDeepDB	1	pos	1.63215e+06	605898	791649	551944	975448	655278	1.65592e+06	1.13447e+06	1.12672e+06	342851	523771	1.50088e+06	505370	573848	1.3226e+06	587353	1.12927e+06	1.17642e+06	1.89386e+06	1.93514e+06	1.1088e+06	792491	321624	1.75415e+06
M560T389_3	Geldanamycin	560.273	388.6	560.273	0.892422	C29H40N2O9	[M]+			C11222		30562-34-6		BioDeepDB	1	pos	56234.9	86834.7	88179.9	762077	69553.8	867757	136978	205391	925600	2.37076e+06	231686	1.54855e+06	1.61736e+06	2.4096e+06	3.08713e+06	1.24722e+06	3.98291e+06	1.42243e+06	1.25267e+06	1.95444e+06	2.4682e+06	2.50301e+06	3.25373e+06	5.59652e+06
M465T603_2	Bacampicillin	465.154	602.7	465.157	7.30941	C21H27N3O7S	[M]+	Lactams	Beta lactams	C08122		50972-17-3	HMDB0015540	BioDeepDB	1	pos	212526	252068	276370	297878	463332	113154	257254	183733	552252	425916	592379	376907	605168	399173	403892	158609	426590	604900	654085	293596	429355	199363	314890	154017
M263T328	Cinoxacin	263.069	327.5	262.059	11.1149	C12H10N2O5	[M+H]+	Diazanaphthalenes	Benzodiazines	C08052		28657-80-9	HMDB0014965	BioDeepDB	1	pos	167534	38572.8	442407	181339	198918	207486	632522	536677	1.38993e+06	338442	327648	1.4253e+06	1.22169e+06	1.00225e+06	361007	2.31246e+06	2.14632e+06	1.67556e+06	2.09963e+06	2.56862e+06	2.67777e+06	2.86826e+06	1.10148e+06	1.19546e+06
M159T672	1-Hydroxymethylnaphthalene	159.081	672.4	158.073	0.150867	C11H10O	[M+H]+	Naphthalenes		C14089	Xenobiotics biodegradation and metabolism; Global and overview maps	4780-79-4	HMDB0060322	BioDeepDB	1	pos	395725	283478	186592	366351	513252	755501	388893	441657	501127	449017	428904	341179	483140	220821	309503	446660	397199	253396	491921	425188	382293	401331	160260	459234
M128T364	(S)-2-Propylpiperidine	128.143	364.5	127.136	0.780375	C8H17N	[M+H]+			C06523	Chemical structure transformation maps	458-88-8	HMDB0030285	BioDeepDB	1	pos	4.08853e+06	1.17358e+06	1.41841e+06	2.88721e+06	2.04275e+06	1.07568e+06	2.16278e+06	2.569e+06	4.41342e+06	2.29829e+06	3.01371e+06	3.37476e+06	3.05475e+06	3.73175e+06	2.47915e+06	2.14846e+06	3.87783e+06	2.85606e+06	3.09687e+06	3.83002e+06	3.12019e+06	2.64066e+06	6.46207e+06	4.36567e+06
M252T626	Oxcarbazepine	252.09	625.9	252.09	2.3801	C15H12N2O2	[M]+	Benzazepines	Dibenzazepines	C07492	Xenobiotics biodegradation and metabolism	28721-07-5	HMDB0014914	BioDeepDB	1	pos	82139.4	353351	274804	133182	174741	682034	306192	200948	160895	272296	330706	261666	249627	272814	323245	269358	456679	347450	905978	115369	246924	264014	309414	202705
M770T369	Hoiamide C	770.369	368.7	770.378	12.1532	C37H62N4O7S3	[M]+							BioDeepDB	1	pos	194846	222812	186184	176163	265362	42842.3	440571	199317	184917	245855	241716	175870	181431	212790	140399	131152	374943	211835	202943	312328	446226	362240	318286	186108
M727T370_1	Fucalpha1-2Galbeta1-4[Fucalpha1-3]GlcNAcbeta-Sp	727.283	369.9	744.291	1.56937	C28H48N4O19	[M+H-H2O]+							BioDeepDB	1	pos	33585.7	397512	57988.9	295029	33260.7	23488.5	237240	264826	66799.9	168857	180793	283335	268205	44845.9	283988	39350.4	434705	23971.5	190226	519636	169807	180228	55141	80185.1
M905T567_6	Bryostatin 1	905.453	566.5	904.446	0.468274	C47H68O17	[M+H]+			C05149		83314-01-6		BioDeepDB	1	pos	479674	89920.9	182405	610958	290844	165056	279372	339559	385202	434798	492524	171213	465727	162657	888497	507166	435555	387579	564344	906918	737383	744593	420087	128316
M222T101_2	Carbofuran	222.113	101	221.105	0.558275	C12H15NO3	[M+H]+	Coumarans		C14291		1563-66-2	HMDB0031770	mzCloud	1	pos	9.0464e+06	3.01127e+06	2.00443e+06	1.37281e+07	5.91654e+06	3.75257e+06	2.80949e+06	2.23224e+06	1.93787e+06	5.7636e+06	1.84909e+06	1.55761e+06	5.80307e+06	2.24581e+06	2.39247e+06	5.75047e+06	4.8995e+06	2.12797e+06	2.77444e+06	2.40789e+06	2.81656e+06	2.80969e+06	2.72265e+06	2.36746e+06
M254T378	Proguanil	254.116	378	253.109	2.26668	C11H16ClN5	[M+H]+	Organonitrogen compounds	Guanidines	C07631		500-92-5	HMDB0015263	BioDeepDB	1	pos	427900	675800	807767	705204	525194	442357	711336	443751	423514	410049	279088	775459	969967	874884	761845	949704	401690	1.19097e+06	749553	772335	479297	360591	744441	548312
M631T379_3	Cytotrienin A	631.331	378.8	648.341	4.16976	C37H48N2O8	[M+H-H2O]+					189010-85-3		BioDeepDB	1	pos	525355	3.10067e+06	291872	262030	180335	218423	268668	258084	79844.8	516406	780420	67890	72913.7	10089.3	112586	39022	465788	50985.8	95791.9	124605	217518	127727	358612	28777.4
M506T810_1	PD 173074	506.321	809.8	523.327	1.86796	C28H41N7O3	[M+H-H2O]+					219580-11-7		BioDeepDB	1	pos	1.21785e+07	6.45045e+06	7.3106e+06	9.42841e+06	1.19908e+07	1.36662e+07	7.45699e+06	1.078e+07	9.91127e+06	1.63837e+07	1.07102e+07	1.17111e+07	8.90236e+06	1.35552e+07	7.87941e+06	1.27318e+07	9.24461e+06	7.5639e+06	8.63566e+06	1.42006e+07	5.95414e+06	1.24969e+07	1.74958e+07	1.74097e+07
M270T736	Orphenadrine	270.186	735.9	269.178	1.19918	C18H23NO	[M+H]+	Benzene and substituted derivatives	Diphenylmethanes	C07935		83-98-7	HMDB0015304	BioDeepDB	1	pos	319937	1.5535e+06	516690	1.038e+06	698254	544939	709535	783311	538393	389876	590846	459879	487097	414874	99433.1	308575	270865	86102.9	560101	459845	113517	42744.2	49025	53119.1
M286T384	Pentazocine	286.211	384.3	285.209	19.2166	C19H27NO	[M+H]+	6,7-benzomorphans	2,6-dimethyl-3-benzazocines	C07421		359-83-1	HMDB0014790	BioDeepDB	1	pos	4.79273e+06	2.55759e+06	4.62692e+06	2.97437e+06	6.57012e+06	3.08749e+06	7.24438e+06	4.8245e+06	5.88269e+06	6.88347e+06	5.27572e+06	4.39593e+06	5.49403e+06	4.97888e+06	3.4845e+06	3.44744e+06	2.33334e+06	4.16361e+06	3.6118e+06	6.1698e+06	5.27248e+06	4.02685e+06	4.41711e+06	2.68978e+06
M622T754	(+)-Tetrandrine	622.303	753.7	622.304	1.76763	C38H42N2O6	[M]+			C09654	Chemical structure transformation maps	518-34-3		BioDeepDB	1	pos	253460	281077	244965	322432	281214	209845	352079	388654	111114	161866	344702	118711	388584	147228	171453	441617	97935.1	126896	303500	353992	168587	356934	321635	111149
M221T388	Prilocaine	221.17	387.9	220.158	21.8113	C13H20N2O	[M+H]+	Carboxylic acids and derivatives	Amino acids, peptides, and analogues	C07531		721-50-6	HMDB0014888	BioDeepDB	1	pos	3.76265e+07	2.97316e+07	4.39484e+07	3.1228e+07	3.48993e+07	4.24154e+07	8.70011e+06	4.71404e+07	4.1394e+07	4.57336e+07	4.23729e+07	1.24086e+07	2.92906e+07	4.17563e+07	4.6023e+07	8.81996e+06	4.394e+07	3.22825e+07	6.71349e+06	3.86892e+07	3.57188e+07	3.84781e+07	2.88137e+07	4.07124e+07
M818T392_2	1-Stearoyl-2-Arachidonoyl PC-d8	817.64	391.9	817.644	4.60979	C46H76D8NO8P	[M]+							BioDeepDB	1	pos	2.05226e+06	268407	706466	2.09818e+06	781646	589377	998749	1.08467e+06	1.7682e+06	2.46721e+06	1.29752e+06	1.68165e+06	1.06492e+06	2.02017e+06	2.30871e+06	284924	1.49397e+06	1.6873e+06	1.01091e+06	1.59508e+06	2.31063e+06	1.30621e+06	1.03232e+06	3.66781e+06
M599T756	Lys-Gln-Ala-Gly-Asp-Val	599.311	756.2	616.318	0.157401	C25H44N8O10	[M+H-H2O]+					80755-87-9		BioDeepDB	1	pos	7.27133e+06	5.35371e+06	1.01319e+07	5.94579e+06	6.93746e+06	2.07726e+07	9.39748e+06	7.771e+06	8.544e+06	7.01165e+06	8.47583e+06	7.70519e+06	5.90249e+06	2.61412e+06	6.65831e+06	8.02529e+06	8.14503e+06	2.34416e+07	1.09216e+07	6.58861e+06	4.85386e+06	6.44835e+06	9.52148e+06	7.22595e+06
M189T397	Carbimazole	189.074	397.2	186.046	24.858	C7H10N2O2S	[M+H]+	Azoles	Imidazoles	C07615		22232-54-8	HMDB0014533	BioDeepDB	1	pos	5.87545e+07	272143	3.43693e+07	2.74593e+07	4.69023e+07	4.30093e+07	4.81661e+07	1.61631e+07	6.70244e+07	6.71977e+07	8.7676e+07	8.90655e+07	5.19178e+07	4.11658e+07	6.43194e+07	4.87653e+07	3.54783e+07	5.00092e+07	4.03771e+07	4.47424e+07	4.77154e+07	6.22269e+07	5.44744e+07	9.96807e+07
M530T397_1	VITAMIN E SUCCINATE(TOCOPHEROL SUCCINATE)	530.384	397.4	530.397	25.6887	C33H54O5	[M]+					4345-03-3		BioDeepDB	1	pos	3.44617e+06	216978	5499.96	4.3638e+06	4.12793e+06	4.64102e+06	195308	235940	215721	3.65479e+06	216565	8151.37	3.48702e+06	211615	215873	4.96932e+06	2.84855e+06	230872	261778	264877	255567	265132	328290	194395
M203T400	4-AMINOETHYLBENZENESULFONYL FLUORIDE	203.048	399.5	203.042	29.9054	C8H10FNO2S	[M]+					30827-99-7		BioDeepDB	1	pos	7.48821e+07	1.87795e+08	1.60751e+08	1.74915e+08	1.14887e+08	7.54628e+07	9.85235e+07	2.72785e+08	1.09058e+08	2.27194e+08	1.48089e+08	1.25659e+08	1.56763e+08	1.29721e+08	1.59624e+08	1.4574e+08	2.18881e+08	1.77387e+08	1.76025e+08	2.65838e+08	2.02123e+08	1.76046e+08	1.22978e+08	8.20685e+07
M179T403	Geranyl acetate	179.137	402.7	196.146	10.4166	C12H20O2	[M+H-H2O]+	Fatty Acyls	Fatty alcohol esters	C09861		105-87-3	HMDB0035157	BioDeepDB	1	pos	1.65042e+06	1.21575e+06	546820	2.85235e+06	1.3622e+06	675703	1.45361e+06	1.51169e+06	652032	1.30279e+06	4.72819e+06	4.23597e+06	201972	2.17688e+06	879360	1.2633e+06	1.50683e+06	729173	1.37395e+06	2.33718e+06	1.99099e+06	1.32029e+06	3.25698e+06	1.72606e+06
M660T403	C-12 NBD Ceramide	660.488	402.8	659.462	28.7112	C36H61N5O6	[M+H]+					202850-01-9		BioDeepDB	1	pos	715878	289653	135245	255650	843705	70374.6	1.03043e+06	76649.3	1.6176e+06	1.29953e+06	521872	859295	75370.9	1.01668e+06	151884	990931	161535	711038	724514	122581	862681	915527	264940	779917
M679T403_9	ThioFluor 623	679.196	402.9	678.174	21.5138	C31H30N6O10S	[M+H]+					1004324-99-5		BioDeepDB	1	pos	1.16973e+07	1.80122e+07	1.60031e+07	2.68659e+07	4.46454e+06	5.12978e+06	2.66163e+07	5.3705e+06	9.22367e+06	1.17502e+07	6.9935e+06	3.7342e+06	6.01609e+06	9.54774e+06	3.40524e+06	1.0117e+07	7.40713e+06	6.52164e+06	7.71242e+06	7.00456e+06	1.7249e+07	1.07464e+07	1.00098e+07	1.36247e+07
M792T583_1	Protoveratrine B	792.41	582.7	809.42	2.85963	C41H63NO15	[M+H-H2O]+			C10816		124-97-0		BioDeepDB	1	pos	117473	871807	39438.8	883404	330376	76771.7	117193	7854.26	641250	1.42708e+06	413345	545945	294806	409757	890625	321624	186040	482759	154071	45725.5	301488	96359.2	388924	680077
M836T403_1	dirithromycin	835.556	403.1	834.545	4.06915	C42H78N2O14	[M+H]+					62013-04-1		BioDeepDB	1	pos	652676	948011	685868	522815	1.31849e+06	1.58534e+06	876090	947339	455317	542961	667706	511370	863547	938724	281391	834733	580563	690185	956367	582181	790947	760335	791723	359974
M622T403_1	1,2-Dioleoyl-sn-glycerol	621.552	403.2	620.538	10.2968	C39H72O5	[M+H]+					24529-88-2		BioDeepDB	1	pos	4.81378e+06	709290	2.43602e+06	1.87154e+06	3.74311e+06	2.35103e+06	24254.5	1.14164e+06	4.04788e+06	3.58363e+06	4.6716e+06	4.28166e+06	3.20904e+06	2.65717e+06	3.77772e+06	3.38427e+06	2.21382e+06	3.68514e+06	3.09967e+06	2.22966e+06	2.41277e+06	2.75104e+06	2.83113e+06	4.37454e+06
M747T512_1	3-dodecanoyl-NBD Cholesterol	746.556	511.6	746.535	0.207125	C45H70N4O5	[M-H2O+NH4]+							BioDeepDB	1	pos	4.89066e+07	7.03685e+07	3.90889e+07	1.02479e+08	5.33392e+08	3.63423e+07	1.17689e+08	1.07994e+08	2.77101e+08	4.90376e+08	1.06385e+08	3.86256e+07	4.03272e+06	3.51572e+07	7.37025e+06	4.171e+07	4.29849e+06	1.81356e+08	1.6107e+08	3.66852e+07	5.13505e+06	6.96843e+06	2.78249e+08	9.87038e+07
M702T403_1	1,2-dioleoyl-sn-Glycero-3-Phosphate	701.504	403.3	700.504	10.7997	C39H73O8P	[M+H]+							BioDeepDB	1	pos	1.24695e+06	431016	1.00824e+06	305201	949405	787755	1.17758e+06	665409	220391	15287	348760	433155	829295	45111.7	433964	853091	40429.1	1.06546e+06	293931	68959.2	32213.1	122353	32706.6	43197.2
M820T403	Trunkamide A	820.431	403.4	837.446	9.20092	C43H63N7O8S	[M+H-H2O]+							BioDeepDB	1	pos	573928	31503.7	4836.81	966734	821874	702022	4191.67	6115.41	1286.85	539875	733.522	4948.25	1.00065e+06	33228.6	2817.07	549893	663693	8992.48	1444.01	1361.69	35439.8	578.335	28649.3	28084.2
M290T701	Dyclonine	290.209	700.9	289.204	0.647288	C18H27NO2	[M+H]+	Organooxygen compounds	Carbonyl compounds	C07881		586-60-7	HMDB0014783	BioDeepDB	1	pos	376894	352118	395056	178524	383806	352801	164549	414598	390312	298064	349639	175552	325157	365858	361537	343389	434296	448801	455088	596308	485188	396026	316161	390260
M823T635_2	NBD-Stearoyl-2-Arachidonoyl-sn-glycerol	822.566	634.7	822.551	6.67346	C47H74N4O8	[M-H2O+NH4]+							BioDeepDB	1	pos	3.03014e+07	2.61397e+07	3.19015e+07	5.72429e+06	2.02567e+07	3.92328e+07	2.44008e+07	2.32013e+07	3.64772e+07	1.64288e+07	7.3441e+06	2.29983e+07	2.347e+07	1.36297e+07	3.04193e+07	4.70898e+07	7.03239e+06	4.19322e+07	2.79318e+07	2.64393e+07	3.14509e+07	3.26276e+07	3.19265e+07	1.40196e+07
M313T779	Levonorgestrel	313.219	778.6	312.209	7.98164	C21H28O2	[M+H]+	Steroids and steroid derivatives	Estrane steroids	C08153		797-63-7/6533-00-2	HMDB0014511	BioDeepDB	1	pos	595643	289408	727517	437857	240453	470772	332035	774810	865886	348240	283406	694159	270350	376282	903659	944758	330337	1.06492e+06	605786	791948	565763	488296	606760	278251
M629T434	Prostaglandin A1-biotin	629.407	433.9	646.413	1.9738	C35H58N4O5S	[M+H-H2O]+							BioDeepDB	1	pos	499015	449810	442328	75992.2	1.1189e+06	292895	995907	754079	573479	680398	414549	432695	360698	617621	372975	210348	490842	435610	658415	874936	1.04025e+06	415510	563097	622479
M192T384	Carbendazim	192.077	384.1	191.07	0.12495	C9H9N3O2	[M+H]+	Benzimidazoles	2-benzimidazolylcarbamic acid esters	C10897		10605-21-7	HMDB0031769	mzCloud	1	pos	815631	2.41106e+06	388293	576777	72085.1	187211	509311	74562.5	102172	1.04581e+06	953113	127802	83238.6	108581	329412	85697.2	373894	61251.2	93744.4	140926	108461	165184	131908	135953
M760T796	1-Stearoyl-2-Oleoyl-sn-Glycero-3-[Phospho-rac-(1-glycerol)]	759.559	796.3	776.557	12.5447	C42H81O10P	[M+H-H2O]+							BioDeepDB	1	pos	1.61717e+06	1.54805e+06	1.58677e+06	1.61911e+06	1.20729e+06	1.17154e+06	1.78878e+06	1.88486e+06	1.53392e+06	1.86552e+06	1.69681e+06	1.39447e+06	1.84774e+06	2.43901e+06	1.00321e+06	1.95802e+06	2.19898e+06	1.60913e+06	1.35862e+06	1.81664e+06	1.89105e+06	1.78757e+06	1.80586e+06	1.44998e+06
M290T639	Benzatropine	290.186	639.2	307.194	0.916654	C21H25NO	[M+H-H2O]+	Benzene and substituted derivatives	Diphenylmethanes	C06846		86-13-5	HMDB0014390	BioDeepDB	1	pos	74665.6	543903	420894	86601.3	64807.8	67034.8	414583	467159	384473	91458.9	322069	258476	79554.5	259609	420618	92268	74405.9	253725	433311	326159	400386	302093	451185	293223
M714T748_2	Glucocerebrosides	713.538	747.9	713.544	8.38498	C40H75NO9	[M]+							BioDeepDB	1	pos	807999	462013	592827	273731	280218	363744	318315	421729	746107	376298	723493	932376	348967	402404	229411	329422	573279	852705	853103	385046	700765	971741	942986	390818
M344T694	Oxyphencyclimine	344.211	694	344.21	2.32416	C20H28N2O3	[M]+	Diazines	Pyrimidines and pyrimidine derivatives	C07851		125-53-1/125-52-0	HMDB0014527	BioDeepDB	1	pos	558669	248557	885620	261949	305709	641794	247532	868301	340375	715517	801332	552055	365084	245005	370180	330756	209975	629697	573083	784431	1.04771e+06	1.44717e+06	373118	300401
M811T421_1	PI(16_0_16_0)	810.536	421.4	810.526	12.2475	C41H79O13P	[M]+							BioDeepDB	1	pos	143882	15554.5	29645.9	422155	33005.6	30226.8	194717	242131	134073	25791.8	132900	118324	106328	99135.3	230544	189047	123994	10127.2	136802	126125	19910.9	98059.5	51752.5	43693
M289T422_3	W123	289.19	422.2	306.194	9.9979	C17H26N2O3	[M+H-H2O]+							BioDeepDB	1	pos	456128	44857.9	612345	74648.1	459869	227966	562323	441626	246139	405754	477164	489919	186446	91214.2	152611	101336	644220	177461	99752	312471	512907	379603	1.06233e+06	164996
M576T422_2	C-6 NBD Ceramide	576.378	422.2	575.368	4.68442	C30H49N5O6	[M+H]+					86701-10-2		BioDeepDB	1	pos	961435	201436	781436	510489	674305	759209	383643	675099	761407	798759	892153	1.26894e+06	364629	893158	844499	1.21066e+06	1.33411e+06	1.30529e+06	713103	1.09545e+06	1.27828e+06	1.2905e+06	1.00629e+06	1.45859e+06
M327T814	Medroxyprogesterone	327.227	814.3	344.235	1.11849	C22H32O3	[M+H-H2O]+	Steroids and steroid derivatives	Pregnane steroids	C07119		520-85-4	HMDB0001939	BioDeepDB	1	pos	1.50985e+06	1.53609e+06	1.39951e+06	1.37336e+06	3.0256e+06	2.32638e+06	3.18188e+06	6.34681e+06	2.48754e+06	4.38439e+06	2.31777e+06	4.59388e+06	4.72369e+06	4.74695e+06	1.73694e+06	2.01154e+06	6.00517e+06	7.13312e+06	3.26402e+06	6.46575e+06	4.60419e+06	6.88364e+06	5.90477e+06	5.88284e+06
M327T427_2	Ajmaline	327.212	427	326.199	15.8918	C20H26N2O2	[M+H]+	Ajmaline-sarpagine alkaloids		C06542	Biosynthesis of other secondary metabolites; Global and overview maps	4360-12-7	HMDB0015495	BioDeepDB	1	pos	259783	946007	188556	190820	269557	93463.3	384996	358500	504121	168426	257064	369194	81602.1	316545	534624	213147	157857	317224	366393	535530	500429	275375	138139	471402
M292T619	Methadone	292.201	619.2	309.209	3.99041	C21H27NO	[M+H-H2O]+	Benzene and substituted derivatives	Diphenylmethanes	C07163	Xenobiotics biodegradation and metabolism	76-99-3	HMDB0014477	BioDeepDB	1	pos	7.95543e+07	1.06267e+07	4.1632e+07	8.11453e+07	1.57353e+07	1.10264e+07	4.07968e+07	3.57389e+07	3.50299e+07	2.09814e+07	1.98253e+07	1.3385e+08	9.43266e+07	1.74955e+07	1.69004e+08	4.69036e+07	8.82928e+07	1.602e+07	2.43016e+07	6.8448e+06	8.91546e+06	1.81802e+07	5.21056e+07	4.5788e+07
M130T435	Agmatine	130.123	434.5	130.122	6.91655	C5H14N4	[M]+	Organonitrogen compounds	Guanidines	C00179	Amino acid metabolism; Global and overview maps	306-60-5	HMDB0001432	BioDeepDB	1	pos	176997	257660	120116	258620	211041	34265.7	486458	454584	296520	415107	696650	504293	419095	388133	769094	394481	417836	550188	299752	723769	339791	522527	343033	396942
M371T763	Tamoxifen	371.219	763	371.225	14.5466	C26H29NO	[M]+	Stilbenes		C07108	Xenobiotics biodegradation and metabolism	10540-29-1	HMDB0014813	BioDeepDB	1	pos	9.69458e+06	1.41577e+07	7.91432e+06	5.31927e+06	1.31318e+07	4.55306e+06	1.23089e+07	1.5612e+07	6.32121e+06	1.66863e+07	1.21859e+07	8.30754e+06	1.58899e+07	9.52016e+06	5.54427e+06	1.76502e+07	1.29578e+07	1.23005e+07	9.51898e+06	8.12322e+06	1.61749e+07	7.16476e+06	1.05425e+07	1.30662e+07
M583T711	Dihydroergotamine	583.284	711.2	583.279	7.20061	C33H37N5O5	[M]+	Ergoline and derivatives	Lysergic acids and derivatives	C07798		6190-39-2/511-12-6	HMDB0014465	BioDeepDB	1	pos	176487	69068.9	66240.1	99171.7	226961	255964	49743.6	134186	371524	391848	134270	108731	284522	174339	383525	66755	543332	423128	447723	309222	314068	167290	253152	281805
M328T728	Labetalol	328.175	727.5	328.179	12.4933	C19H24N2O3	[M]+	Benzene and substituted derivatives	Benzoic acids and derivatives	C07063		36894-69-6	HMDB0014736	BioDeepDB	1	pos	475736	265697	535525	478512	658166	567360	284225	530534	591520	390248	621214	569500	556021	471127	485711	526272	760376	333562	725640	886538	530846	624256	610690	487708
M244T820	N1-Acetylspermine	244.227	819.6	244.226	3.68509	C12H28N4O	[M]+	Carboxylic acids and derivatives	Carboxylic acid derivatives	C02567		25593-72-0	HMDB0001186	BioDeepDB	1	pos	2.2749e+06	967334	4.1313e+06	1.39542e+06	1.20195e+06	2.79681e+06	1.28648e+06	4.06058e+06	6.61337e+06	2.73725e+06	1.29833e+06	5.06369e+06	7.05279e+06	5.25763e+06	7.91782e+06	5.24475e+06	9.64627e+06	2.99564e+06	8.32568e+06	2.96635e+06	5.58551e+06	1.8111e+06	4.18605e+06	3.76596e+06
M471T454	4-Quinolone-3-Carboxamide Furan CB2 Agonist	471.259	453.6	488.268	2.27826	C30H36N2O4	[M+H-H2O]+					1314230-75-5		BioDeepDB	1	pos	136339	648955	312599	318259	193467	269430	172126	244463	204439	169006	146683	166353	199402	205966	262628	156058	139717	299856	314637	226314	253543	260734	91536.9	134631
M181T455	Caffeic acid	181.05	454.8	180.042	1.23723	C9H8O4	[M+H]+	Cinnamic acids and derivatives	Hydroxycinnamic acids and derivatives	C01197		331-39-5/501-16-6	HMDB0001964	BioDeepDB	1	pos	729863	239083	335790	625745	581999	324486	298508	478640	384993	453150	679790	465065	547341	763649	94994.9	720979	414755	440712	405515	385958	548350	563049	1.36489e+06	536663
M199T455	Vanillylmandelic acid	199.06	454.8	198.053	0.381794	C9H10O5	[M+H]+	Phenols	Methoxyphenols	C05584	Amino acid metabolism; Global and overview maps	55-10-7	HMDB0000291	BioDeepDB	1	pos	859044	107854	696707	676975	865184	314381	563824	1.24449e+06	943916	690767	820132	536829	752219	424418	439975	748914	692475	644558	567764	379666	471507	723186	1.38651e+06	718758
M213T457	Omethoate	213.023	457.3	213.023	4.22489	C5H12NO4PS	[M]+			C18662		1113-02-6		BioDeepDB	1	pos	125313	164096	185189	179206	210877	173965	315063	110046	328422	403470	324358	458255	430170	672285	367282	251431	435771	640310	687651	243804	1.63641e+06	919123	919181	962000
M340T376	Propoxyphene	340.223	375.9	339.22	0.0706955	C22H29NO2	[M+H]+	Stilbenes		C07406		469-62-5	HMDB0014785	BioDeepDB	1	pos	371751	303407	171847	235463	134173	83843.9	145667	203487	170707	163810	58355.3	148933	590433	291375	313621	423504	185212	367657	462037	393266	581251	503547	256711	426299
M302T466	Enterodiol	302.149	465.8	302.152	9.26695	C18H22O4	[M]+	Dibenzylbutane lignans	Dibenzylbutanediol lignans	C18166		80226-00-2	HMDB0005056	BioDeepDB	1	pos	259423	99628.1	184289	180657	269991	190953	186151	237201	216112	794975	468908	442062	199853	399759	191572	187337	206570	557575	242705	516410	294474	702907	314972	145115
M347T470	Nifedipine	347.123	469.7	346.116	1.08319	C17H18N2O6	[M+H]+	Pyridines and derivatives	Hydropyridines	C07266		21829-25-4	HMDB0015247	BioDeepDB	1	pos	413509	425318	444543	393709	538900	567898	470783	458861	311884	154592	273589	344300	475541	460688	251345	560275	435111	373822	484768	490078	426537	467313	351956	345426
M464T792	N-Acetyl-leukotriene E4	464.24	791.7	481.25	4.88109	C25H39NO6S	[M+H-H2O]+	Fatty Acyls	Eicosanoids	C11361		80115-95-3	HMDB0005084	BioDeepDB	1	pos	796292	1.43719e+06	2.56671e+06	1.46697e+06	1.73106e+06	1.94271e+06	966068	1.65144e+06	1.29896e+06	1.83392e+06	1.49059e+06	2.34577e+06	866747	1.34863e+06	1.0932e+06	1.79597e+06	2.11502e+06	1.31249e+06	1.97882e+06	1.54393e+06	1.93643e+06	922049	2.29934e+06	1.87016e+06
M810T512_5	Vinblastine	810.418	511.7	810.42	2.83804	C46H58N4O9	[M]+	Vinca alkaloids		C07201	Chemical structure transformation maps; Biosynthesis of other secondary metabolites; Global and overview maps; Digestive system	865-21-4	HMDB0014710	BioDeepDB	1	pos	2.37804e+06	514776	581783	1.63308e+06	2.01075e+06	993473	584120	702457	1.79149e+06	2.94909e+06	2.3105e+06	1.03078e+06	1.49352e+06	2.06768e+06	643546	1.45028e+06	1.41369e+06	1.46619e+06	2.14517e+06	786582	791192	856608	5.2772e+06	2.04628e+06
M991T474_14	Maltohexaose	991.332	473.8	990.327	2.49765	C36H62O31	[M+H]+	Organooxygen compounds	Carbohydrates and carbohydrate conjugates	C01936		34620-77-4	HMDB0012253	BioDeepDB	1	pos	925037	1.06083e+06	919038	1.18365e+06	1.42036e+06	927425	739170	1.01452e+06	2.19386e+06	2.26539e+06	2.20858e+06	2.11943e+06	1.76852e+06	2.28011e+06	1.79372e+06	1.53535e+06	1.6111e+06	2.47519e+06	1.97789e+06	1.04221e+06	2.35792e+06	1.84598e+06	2.26473e+06	1.81299e+06
M793T474_1	Phosphine-biotin	793.346	473.8	792.332	8.76301	C41H53N4O8PS	[M+H]+							BioDeepDB	1	pos	2.06109e+06	501027	1.67671e+06	1.26788e+06	1.67369e+06	902989	1.3983e+06	497337	527365	1.02004e+06	701556	1.28021e+06	2.09868e+06	1.27234e+06	594715	889597	962173	1.53804e+06	1.99268e+06	645472	612656	1.41572e+06	2.64628e+06	2.02566e+06
M307T706	Quinidine	307.176	706.2	324.184	2.49369	C20H24N2O2	[M+H-H2O]+	Cinchona alkaloids		C06527	Chemical structure transformation maps	56-54-2	HMDB0015044	BioDeepDB	1	pos	2.6099e+06	931947	1.93998e+06	3.79631e+06	840459	2.20006e+06	355764	2.91407e+06	959009	486755	981369	2.68662e+06	1.57821e+06	1.97047e+06	3.69283e+06	1.15691e+06	2.06558e+06	1.40865e+06	1.39217e+06	1.54289e+06	998170	1.45713e+06	1.23431e+06	2.04674e+06
M640T476	Moxidectin	640.386	476.3	639.377	2.34234	C37H53NO8	[M+H]+					113507-06-5		BioDeepDB	1	pos	130773	504148	528922	361831	353358	184076	380234	512103	815338	1.42476e+06	414625	775849	673862	770726	762377	696077	591877	759447	621029	482013	596869	638278	680464	1.76644e+06
M574T480_5	CAY10599	574.287	479.9	591.298	7.90446	C38H41NO5	[M+H-H2O]+					1143573-33-4		BioDeepDB	1	pos	2.01787e+06	1.5011e+06	3.98697e+06	1.41243e+06	1.53836e+06	1.44318e+06	2.0949e+06	1.83569e+06	2.41241e+06	4.53769e+06	1.78625e+06	1.60888e+06	1.59181e+06	1.46415e+06	3.39366e+06	1.71075e+06	3.18556e+06	1.43369e+06	910712	1.10217e+06	2.63664e+06	2.09945e+06	842732	3.43397e+06
M574T480_10	A2E	574.444	480	591.444	12.218	C42H57NO	[M+H-H2O]+							BioDeepDB	1	pos	3.01243e+06	4.4746e+06	8.02911e+06	1.59291e+06	3.13426e+06	3.89569e+06	1.00915e+07	8.0735e+06	1.00185e+07	1.06637e+07	1.62454e+07	8.65057e+06	1.14923e+07	5.93751e+06	2.00936e+07	2.41658e+06	1.06449e+07	1.21702e+07	3.1506e+06	6.05148e+06	2.6894e+06	4.10413e+06	4.86866e+06	7.00652e+06
M536T770_2	13(S)-HODE-biotin	536.34	770.4	536.34	0.0498453	C28H48N4O4S	[M]+							BioDeepDB	1	pos	7.01628e+06	9.13977e+06	1.03213e+07	4.51458e+06	1.11881e+07	8.06543e+06	9.15869e+06	9.23427e+06	2.85885e+06	3.86046e+06	4.64987e+06	3.86544e+06	1.01432e+07	6.75925e+06	1.72124e+06	8.45729e+06	4.6056e+06	3.97979e+06	5.09255e+06	3.49419e+06	5.99099e+06	6.69874e+06	1.11222e+07	2.68089e+06
M467T486_4	CAY10508	466.933	486.2	483.942	2.93189	C21H14Br2N2O2	[M+H-H2O]+					878533-35-8		BioDeepDB	1	pos	1.82075e+06	2.39658e+06	1.42714e+06	1.80827e+06	750845	860335	1.12427e+06	1.38269e+06	1.55881e+06	1.44334e+06	1.78842e+06	1.53094e+06	1.68002e+06	2.78211e+06	1.52631e+06	1.24416e+06	1.44058e+06	1.80387e+06	3.35619e+06	1.68895e+06	1.78968e+06	2.21471e+06	1.22632e+06	1.19489e+06
M467T817	Tobramycin	467.263	816.8	467.259	1.00359	C18H37N5O9	[M]+	Organooxygen compounds	Carbohydrates and carbohydrate conjugates	C00397	Biosynthesis of other secondary metabolites; Global and overview maps	32986-56-4	HMDB0014822	BioDeepDB	1	pos	8.21294e+06	946679	2.26526e+06	3.6288e+06	3.49619e+06	266357	1.1885e+06	2.60604e+06	9.45574e+06	5.55557e+06	3.6302e+06	3.20045e+06	2.19444e+06	2.12478e+06	1.06576e+07	3.46234e+06	4.81822e+06	902155	2.02906e+06	2.81618e+06	3.1584e+06	1.6638e+06	2.73254e+06	2.92019e+06
M500T803	Mupirocin	500.297	802.8	500.298	3.39798	C26H44O9	[M]+	Fatty Acyls	Fatty acids and conjugates	C11758		12650-69-0	HMDB0014554	BioDeepDB	1	pos	1.62431e+06	1.29803e+06	1.41708e+06	960124	1.06581e+06	1.2051e+06	1.67619e+06	1.52018e+06	1.92347e+06	1.52272e+06	1.66113e+06	1.54688e+06	1.37823e+06	1.15099e+06	2.02837e+06	1.12855e+06	672410	1.66387e+06	1.61298e+06	1.08725e+06	1.27021e+06	1.22928e+06	1.20686e+06	1.42208e+06
M566T492	Antillatoxin B (red color)	566.36	491.8	565.352	2.74096	C33H47N3O5	[M+H]+							BioDeepDB	1	pos	192599	215710	91450.9	243226	46643.6	27601.8	70515.6	82188.9	145745	319678	84165.8	51417.1	65462.4	140566	184666	196563	52212.4	109246	75120.3	69840.6	50559.6	201573	82202.7	217503
M479T617	Glaucarubin	479.225	616.9	496.231	3.40967	C25H36O10	[M+H-H2O]+	Prenol lipids	Terpene lactones	C08760		1448-23-3	HMDB0035626	BioDeepDB	1	pos	420437	520584	947186	533382	402311	991652	858961	1.39499e+06	570142	791535	714511	595830	476909	572322	882306	439552	759627	886446	2.04107e+06	1.27737e+06	1.03071e+06	592616	762306	762901
M607T818_1	Malyngamide J	607.378	817.8	607.372	9.33143	C33H53NO9	[M]+							BioDeepDB	1	pos	260285	681558	822008	504683	261737	484941	1.31894e+06	355410	380351	182641	449071	334578	285136	97277.3	195549	301631	388899	1.04316e+06	407460	408539	365525	588220	289804	240423
M610T501_2	U-74389G	610.399	501.2	610.4	1.18754	C37H50N6O2	[M]+					153190-29-5		BioDeepDB	1	pos	43394.3	120000	174055	221678	577366	133901	96992.2	242558	157568	76794.3	55650.2	45381.4	49186.7	147446	83856.5	48679.4	47895.4	181422	50901	53256.1	41373.4	37712.9	133055	124280
M805T504_5	PRIEURANIN ACETATE	805.328	504.3	804.32	0.960845	C40H52O17	[M+H]+							BioDeepDB	1	pos	1.35997e+06	586524	267507	1.15802e+06	267768	566712	185779	283971	329905	1.55337e+06	2.22383e+06	851680	1.2192e+06	740356	912927	438787	1.875e+06	800894	492466	1.27587e+06	432865	917750	1.52354e+06	1.38218e+06
M630T504_2	DIHYDROGAMBOGIC ACID	630.313	504.4	630.319	10.4209	C38H46O8	[M]+							BioDeepDB	1	pos	699248	500664	466906	2.60525e+06	700711	551853	595468	692473	1.08256e+06	1.39854e+06	963930	998642	633911	1.27707e+06	1.16624e+06	1.03894e+06	1.0635e+06	1.25377e+06	1.99267e+06	1.29508e+06	851569	869208	618224	519969
M502T830_3	Fexofenadine	502.301	830.1	501.288	11.3478	C32H39NO4	[M+H]+	Benzene and substituted derivatives	Diphenylmethanes	C06999	Digestive system	83799-24-0	HMDB0005030	BioDeepDB	1	pos	1.11054e+09	5.20659e+08	1.35601e+09	8.17852e+08	1.09799e+09	4.46051e+08	1.54442e+09	7.32945e+08	1.4346e+09	1.3023e+09	1.42371e+09	1.44503e+09	1.83547e+09	8.37137e+08	1.32313e+09	1.95266e+09	1.57036e+09	6.51964e+08	1.04194e+09	9.5144e+08	6.71751e+08	1.23807e+09	5.43184e+08	1.14671e+09
M769T506_17	SELAMECTIN	769.442	505.9	769.44	2.84383	C43H63NO11	[M]+					165108-07-6		BioDeepDB	1	pos	6108.18	1.0754e+06	701565	911786	55978.6	1.07399e+06	4.45178e+06	2.72404e+06	1.53837e+06	1.49945e+06	2.73619e+06	1.86442e+06	1.05474e+06	2.85692e+06	2.99449e+06	1.44656e+06	379544	4.92904e+06	2.05761e+06	1.6375e+06	1.58266e+06	1.88474e+06	2.73593e+06	2.90416e+06
M832T834_4	Cyanolide A	832.477	833.9	832.482	6.53022	C42H72O16	[M]+							BioDeepDB	1	pos	3.40597e+06	4.12194e+06	3.62822e+06	3.69724e+06	2.97915e+06	3.71138e+06	3.37694e+06	2.82795e+06	2.23869e+06	5.00305e+06	2.09885e+06	3.81199e+06	3.59616e+06	4.34676e+06	4.70415e+06	4.85996e+06	3.18507e+06	4.2251e+06	3.00939e+06	3.94626e+06	5.1939e+06	3.45472e+06	5.61368e+06	3.05555e+06
M982T510_14	Lacto-N-difucopentaose II	982.377	509.6	999.364	20.266	C38H65NO29	[M+H-H2O]+					62258-12-2	HMDB01986	BioDeepDB	1	pos	1.02512e+06	968179	1.36011e+06	1.82701e+06	2.04501e+06	1.54134e+06	534769	1.88658e+06	1.70903e+06	2.5134e+06	1.87497e+06	2.50307e+06	1.5058e+06	1.39381e+06	1.11588e+06	926410	3.00149e+06	1.76935e+06	2.49161e+06	1.47883e+06	1.63977e+06	1.89192e+06	1.8069e+06	3.6711e+06
M680T510_9	Progesterone 3-biotin	680.419	509.7	697.424	4.47266	C38H59N5O5S	[M+H-H2O]+							BioDeepDB	1	pos	2.6214e+06	1.52296e+06	1.19851e+06	2.17204e+06	1.48376e+06	1.43426e+06	1.01523e+06	1.97906e+06	4.50555e+06	2.00566e+06	2.51885e+06	4.10917e+06	847506	1.98796e+06	6.84756e+06	1.51872e+06	973818	1.74238e+06	619697	3.24247e+06	1.87125e+06	2.66503e+06	1.50426e+06	6.16524e+06
M689T510_18	N-Succinimidyl [tris(2,4,6-trimethoxyphenyl)phosphonio]acetate	689.219	510.4	688.216	6.62693	C33H39NO13P	[M+H]+					226409-58-1		BioDeepDB	1	pos	1.03458e+07	1.43732e+07	2.31898e+07	1.90994e+07	1.2202e+07	2.94719e+07	4.27293e+07	2.23074e+07	2.79719e+07	1.3762e+07	4.46999e+07	1.81801e+07	1.12037e+07	1.82888e+07	5.89388e+06	1.49161e+07	1.30084e+07	1.42848e+07	1.35125e+07	5.18012e+06	1.63369e+07	1.49612e+07	1.76941e+07	1.46589e+07
M689T511_3	TAXININE M	689.279	510.6	688.273	2.73056	C35H44O14	[M+H]+					135730-55-1		BioDeepDB	1	pos	7.58919e+07	9.02301e+06	7.01817e+07	3.51779e+07	5.54191e+07	4.10931e+07	4.66579e+07	5.84468e+07	1.26639e+07	1.2062e+07	3.68378e+07	1.50839e+07	1.96002e+07	2.0249e+07	6.41099e+07	3.83764e+07	2.58579e+07	4.71486e+07	1.12229e+07	3.34057e+07	2.3707e+07	3.66158e+07	7.85408e+06	2.16894e+07
M895T510_13	7-Acetyltaxol	895.367	510.5	895.342	5.31175	C49H53NO15	[M-H2O+NH4]+					92950-39-5		BioDeepDB	1	pos	1.00879e+07	6.75631e+07	8.25274e+07	1.25784e+07	8.38054e+07	7.98495e+07	5.30039e+07	9.05592e+07	2.59948e+07	1.76766e+08	3.9355e+07	6.82236e+06	5.4426e+07	5.71164e+07	6.94263e+07	9.66492e+07	8.71733e+07	2.60663e+07	3.88932e+07	3.17361e+07	5.37634e+07	5.17636e+07	5.87026e+07	5.52641e+07
M746T511_5	Spinosyn D	746.481	510.7	745.476	4.25463	C42H67NO10	[M+H]+			C11056		131929-63-0		BioDeepDB	1	pos	1.40973e+08	4.90243e+07	3.66628e+07	1.92599e+08	8.73993e+07	1.05086e+08	5.28031e+07	2.59169e+07	3.49534e+07	9.07338e+07	3.54277e+07	2.56158e+07	9.04488e+07	3.71902e+07	4.24357e+07	8.13208e+07	5.7335e+07	3.62207e+07	3.66382e+07	3.78928e+07	3.50869e+07	3.08607e+07	2.97071e+07	4.36528e+07
M731T768_1	Spinosyn A	731.462	767.5	731.461	2.32411	C41H65NO10	[M]+			C11054		131929-60-7		BioDeepDB	1	pos	1.20074e+06	988721	974404	2.17448e+06	1.28313e+06	205010	1.68388e+06	1.54863e+06	2.05236e+06	1.37659e+06	2.02215e+06	1.6702e+06	1.79283e+06	1.40072e+06	2.42392e+06	1.9314e+06	2.44289e+06	1.19661e+06	4.64776e+06	2.5487e+06	1.92208e+06	2.00199e+06	2.1624e+06	2.50007e+06
M909T608_1	Nystatin	908.504	608.2	925.504	8.73304	C47H75NO17	[M+H-H2O]+	Organooxygen compounds	Carbohydrates and carbohydrate conjugates	C06572		1400-61-9	HMDB0014784	BioDeepDB	1	pos	350509	637555	625608	354814	215834	11864.8	426172	322427	524559	326848	317273	533238	552034	286003	486382	281497	733315	1.74289e+06	434947	789666	574223	759810	2.0965e+06	529794
M908T511_3	Hoiamide A	908.447	511.4	925.436	20.5058	C44H71N5O10S3	[M+H-H2O]+							BioDeepDB	1	pos	29258.3	434846	162015	1.05898e+06	1.40521e+06	203233	117070	155980	2.89724e+06	5.59229e+06	494269	2.52967e+06	2.81534e+06	5.39984e+06	3.92337e+06	1.29304e+06	2.82031e+06	1.09029e+06	2.49102e+06	1.87419e+06	4.93033e+06	2.82345e+06	8.753e+06	8.91606e+06
M137T517	4-Propylphenol	137.096	516.8	136.089	0.729415	C9H12O	[M+H]+	Benzene and substituted derivatives	Phenylpropanes	C14311		645-56-7	HMDB0032625	BioDeepDB	1	pos	734560	738307	734093	824446	33016.5	39554.4	931184	900247	804771	1.23906e+06	870445	1.30894e+06	929192	968636	1.20799e+06	929023	611026	1.00716e+06	106220	712647	1.04604e+06	1.2171e+06	903013	774252
M627T517_1	15-deoxy-Delta12,14-Prostaglandin J2-biotin	627.395	517.2	626.387	2.39084	C35H54N4O4S	[M+H]+							BioDeepDB	1	pos	2.19e+06	2.71796e+06	1.18307e+06	925670	1.32804e+07	2.79747e+06	3.73025e+06	9.74518e+06	1.99335e+06	2.41094e+06	2.06655e+06	1.54095e+06	4.40971e+06	6.02773e+06	3.91694e+06	658571	2.32988e+06	1.89123e+06	1.15025e+06	1.58625e+06	8.59023e+06	1.04072e+07	1.47488e+06	1.96758e+06
M690T522_3	Microcolin C	690.47	521.9	689.473	14.0484	C37H63N5O7	[M+H]+							BioDeepDB	1	pos	1.77516e+06	1.97263e+06	3.0558e+06	1.92743e+06	1.07473e+06	995953	3.31666e+06	2.6006e+06	1.73742e+06	3.19602e+06	4.47789e+06	3.09276e+06	1.95953e+06	2.1668e+06	2.07493e+06	2.75114e+06	1.87078e+06	950370	1.3953e+06	3.0176e+06	3.14646e+06	1.95711e+06	2.09775e+06	1.76613e+06
M248T525	Albendazole	248.075	525.5	265.089	23.2429	C12H15N3O2S	[M+H-H2O]+	Benzimidazoles	2-benzimidazolylcarbamic acid esters	C01779		54965-21-8	HMDB0014659	BioDeepDB	1	pos	17010.7	89841.2	74160.6	73687.3	62005.2	17488	66563.5	31095.6	69996.5	29952.3	17651.2	68519.5	36961.7	39810.8	97214.7	20570.3	43773	40112.5	79196.4	54475.7	19914.3	88470.6	24100.6	64724.6
M198T536	Metanephrine	198.113	535.5	197.105	0	C10H15NO3	[M+H]+	Phenols	Methoxyphenols	C05588	Amino acid metabolism; Global and overview maps	5001-33-2	HMDB0004063	BioDeepDB	1	pos	784583	2.08431e+06	259499	547366	581061	873822	877231	902379	773470	1.00341e+06	2.79367e+06	2.31432e+06	968946	933878	800167	1.49736e+06	1.37063e+06	786454	712685	1.98165e+06	1.32427e+06	837862	2.06475e+06	555855
M582T538_3	Streptomycin	582.279	537.5	581.266	10.0021	C21H39N7O12	[M+H]+	Organooxygen compounds	Carbohydrates and carbohydrate conjugates	C00413	Biosynthesis of other secondary metabolites; Global and overview maps	57-92-1	HMDB0015214	BioDeepDB	1	pos	541547	565065	249536	227004	607586	306554	618470	380359	178587	369948	639020	289475	461666	349029	627578	646589	944891	720084	725548	629261	315116	407793	700199	452932
M581T538_2	Hematoporphyrin IX	581.289	537.7	598.279	29.5878	C34H38N4O6	[M+H-H2O]+	Tetrapyrroles and derivatives	Porphyrins			14459-29-1	HMDB0000668	BioDeepDB	1	pos	3.84725e+06	3.74315e+06	3.54239e+06	3.665e+06	3.21515e+06	1.58261e+06	1.68591e+06	3.27842e+06	1.39473e+06	1.43828e+06	2.45869e+06	1.2691e+06	3.63649e+06	1.85321e+06	1.99006e+06	1.64117e+06	2.55923e+06	1.42163e+06	1.78299e+06	1.42901e+06	3.33066e+06	1.29861e+06	717268	2.53373e+06
M331T775	Deoxycorticosterone	331.226	774.8	330.219	2.0409	C21H30O3	[M+H]+	Steroids and steroid derivatives	Hydroxysteroids	C03205	Lipid metabolism; Global and overview maps; Endocrine system	64-85-7	HMDB0000016	BioDeepDB	1	pos	554215	391105	590073	703241	428461	559939	299767	534475	659020	725335	340280	643864	377842	493038	931886	570604	624847	350317	556319	552419	311475	534867	481542	577269
M501T545	(-)-Gossypol	501.2	545.3	518.194	26.4046	C30H30O8	[M+H-H2O]+	Prenol lipids	Sesquiterpenoids	C07667	Chemical structure transformation maps; Global and overview maps; Metabolism of terpenoids and polyketides	90141-22-3/303-45-7	HMDB0040723	BioDeepDB	1	pos	140537	486372	158821	98292.9	16520.7	39092.7	54905.9	70591.2	120355	343912	285081	153595	97290.7	29159.6	138590	162180	330766	109321	56343.7	61295.4	82394.6	80336.6	70319.5	29405.7
M653T547_2	1-Stearoyl-2-Arachidonoyl-sn-Glycerol-d8	652.591	546.8	652.588	4.46009	C41H64D8O5	[M]+							BioDeepDB	1	pos	981776	384971	1.10795e+06	628441	920063	791063	138357	186263	201626	76955.2	299945	633839	701474	650838	513235	754216	455631	444568	1.06227e+06	698703	1.34044e+06	195055	263862	1.46685e+06
M339T763	Disopyramide	339.231	762.9	339.231	1.76871	C21H29N3O	[M]+	Pyridines and derivatives	Pheniramines	C06965		3737-09-5	HMDB0014425	BioDeepDB	1	pos	5.02431e+06	4.25766e+06	1.3487e+07	1.02295e+07	5.76928e+06	2.47215e+06	1.20465e+07	8.95124e+06	1.32952e+07	3.53767e+07	6.58846e+06	5.83035e+06	9.88096e+06	1.43656e+07	1.11036e+07	5.74943e+06	1.07062e+07	4.15935e+06	1.38211e+07	1.12461e+07	7.18757e+06	1.59196e+07	1.30311e+07	6.76718e+06
M468T790	Buprenorphine	468.31	790	467.304	1.49474	C29H41NO4	[M+H]+	Phenanthrenes and derivatives		C08007		52485-79-7	HMDB0015057	BioDeepDB	1	pos	7.68579e+06	3.67407e+06	7.5431e+06	1.4076e+07	5.38999e+06	3.41187e+06	6.71632e+06	3.47595e+06	6.00861e+07	5.45407e+07	9.13326e+06	3.45364e+07	2.73809e+07	3.37155e+07	5.81995e+07	7.58926e+06	2.86904e+07	7.65594e+06	1.48121e+07	3.89998e+07	1.45663e+07	1.68615e+07	3.72326e+07	3.22997e+07
M289T641	Phenyllactic acid	289.165	641.4	289.168	8.9914	C17H23NO3	[M]+	Phenylpropanoic acids		C01479	Biosynthesis of other secondary metabolites; Global and overview maps	828-01-3/51-55-8/55-48-1	HMDB0000779	BioDeepDB	1	pos	474737	521997	501237	595788	412761	343147	468865	397237	698158	472236	255493	774252	972977	799279	600033	459113	1.21046e+06	624410	457192	675579	366448	152757	291098	286294
M145T682	Caprylic acid	145.123	681.7	144.115	1.37815	C8H16O2	[M+H]+	Fatty Acyls	Fatty acids and conjugates	C06423	Lipid metabolism; Metabolism of cofactors and vitamins; Chemical structure transformation maps; Global and overview maps	124-07-2	HMDB0000482	BioDeepDB	1	pos	529918	1.3924e+06	392883	1.3621e+06	488079	375524	123172	317698	550166	523556	411618	469591	42809.8	361284	379870	231315	48860.1	251227	47268.7	71888.2	194504	68703.5	295774	443307
M328T676	JWH175	328.212	675.5	327.199	17.6715	C24H25N	[M+H]+					619294-35-8		BioDeepDB	1	pos	5.63547e+06	2.45533e+06	5.11973e+06	9.27981e+06	1.01223e+07	1.27068e+07	7.12324e+06	4.566e+06	8.25553e+06	5.49413e+06	3.7488e+06	5.63228e+06	7.65434e+06	5.52252e+06	2.64856e+06	7.19513e+06	4.13513e+06	6.2709e+06	8.27338e+06	6.49378e+06	4.53114e+06	5.84351e+06	3.70966e+06	6.51264e+06
M478T562	CYTOCHALASIN E	478.219	562	495.226	1.32074	C28H33NO7	[M+H-H2O]+					36011-19-5		BioDeepDB	1	pos	40768.6	43461.8	44534.9	43651.7	44364.6	39423	50338.3	46144	31081.3	48725.9	38838.6	46472.4	39216	50427.7	52832.9	39135.3	50127.7	45939.8	35249.1	61936.1	53657.7	55278.5	41752	53308.8
M859T563_3	4-((3S,5R,10S,13R,14S,17S)-14-hydroxy-3-(((2R,3S,4S,5S,6S)-3-hydroxy-4-methoxy-6-methyl-5-(((2S,3R,4S,5S,6R)-3,4,5-trihydroxy-6-((((2R,3R,4S,5S,6R)-3,4,5-trihydroxy-6-(hydroxymethyl)tetrahydro-2H-pyran-2-yl)oxy)methyl)tetrahydro-2H-pyran-2-yl)oxy)tetrahydro-2H-pyran-2-yl)oxy)-10,13-dimethylhexadecahydro-1H-cyclopenta[a]phenanthren-17-yl)furan-2(5H)-one	859.426	563	858.425	7.76053	C42H66O18	[M+H]+							BioDeepDB	1	pos	1.03757e+06	278430	727200	379963	606814	470534	502167	933857	528793	608350	375181	523031	641046	506263	1.12927e+06	407380	908686	560769	1.38927e+06	525738	514370	811534	601198	735030
M641T564_1	Fucoxanthin	641.429	563.7	658.423	20.4762	C42H58O6	[M+H-H2O]+	Prenol lipids	Tetraterpenoids	C08596		3351-86-8	HMDB0002741	BioDeepDB	1	pos	394974	2.1252e+06	3.20838e+06	2.65758e+06	573092	432989	2.48057e+06	1.85134e+06	4.81574e+06	1.46062e+06	2.0067e+06	3.88002e+06	2.18192e+06	821589	3.53268e+06	2.40281e+06	1.02307e+06	1.96559e+06	696075	1.77459e+06	3.50684e+06	3.20588e+06	2.3431e+06	3.39528e+06
M666T564_12	Stachyose	666.217	564	666.222	6.90465	C24H42O21	[M]+	Organooxygen compounds	Carbohydrates and carbohydrate conjugates	C01613	Carbohydrate metabolism; Global and overview maps	470-55-3/10094-58-3 470-55-3/10094-58-3/10094-58-3; 470-55-3	HMDB0003553	BioDeepDB	1	pos	314006	225234	201986	298211	198790	140734	245159	262331	208125	200145	241547	204787	356869	252396	153828	243431	189693	237030	290577	250792	333031	240162	234934	167945
M444T565_1	STROPHANTHIDIN SEMICARBAZIDE	444.244	564.7	461.253	2.36771	C24H35N3O6	[M+H-H2O]+							BioDeepDB	1	pos	1.09838e+06	344947	243957	553760	23857.1	223450	453708	1.20803e+06	1.11e+06	814762	723302	780349	1.01651e+06	547459	501234	385759	764526	856996	71828.7	1.23294e+06	666733	917684	239447	975408
M444T664	AL 8810 isopropyl ester	444.26	663.9	444.268	17.0798	C27H37FO4	[M]+					208114-93-6		BioDeepDB	1	pos	584083	237830	76867	654708	386959	42263.2	369125	83000.6	558560	121434	520764	467545	67535.7	325458	113604	68739.6	381811	74939.1	68674.7	545798	498215	101183	388571	339898
M686T719_1	PA(18_0_18_1(9Z))	685.506	718.9	702.52	9.75046	C39H75O8P	[M+H-H2O]+							BioDeepDB	1	pos	3.16658e+06	3.62341e+06	3.65684e+06	3.08161e+06	2.78034e+06	1.89451e+06	2.07432e+06	2.22287e+06	2.81285e+06	4.15838e+06	4.12187e+06	2.87333e+06	3.14343e+06	1.35924e+06	2.69235e+06	3.51592e+06	3.00418e+06	3.46852e+06	3.50261e+06	5.70204e+06	2.30323e+06	1.7146e+06	1.39902e+06	3.03365e+06
M602T565_4	NO-Losartan A	602.19	565.5	601.184	1.82667	C30H28ClN7O5	[M+H]+					791122-48-0		BioDeepDB	1	pos	223342	186962	367673	337725	295958	340676	221380	341016	319995	770121	304129	237361	253767	297602	390779	293003	600778	416372	695412	300610	136028	232811	222551	294246
M555T568_5	TG(10_0_10_0_10_0)	555.453	568.2	554.455	16.4118	C33H62O6	[M+H]+					621-71-6	HMDB00548	BioDeepDB	1	pos	131718	11064.5	70982.2	144256	149524	187750	81765.2	170876	64498.9	46123.5	146641	155007	132686	164984	81134.8	144317	114290	156002	115378	135225	145943	32592.9	98250.6	88124.2
M214T573	Methyl dodecanoate	214.196	573.2	214.193	14.0989	C13H26O2	[M]+	Fatty Acyls	Fatty acid esters			111-82-0	HMDB0031018	BioDeepDB	1	pos	3.76799e+06	4.91807e+06	5.18727e+06	2.51263e+06	5.52955e+06	7.12238e+06	3.98216e+06	3.86928e+06	469393	1.67327e+06	2.19111e+06	1.36374e+06	3.71142e+06	4.37075e+06	268082	5.49845e+06	1.8939e+06	4.15466e+06	4.26044e+06	3.41763e+06	3.72752e+06	2.23571e+06	1.44164e+06	250337
M653T575_9	Fungichromin	653.366	575.2	670.393	28.8751	C35H58O12	[M+H-H2O]+			C13299		6834-98-6		BioDeepDB	1	pos	1.24202e+06	915015	158606	1.21706e+06	22385.9	36682.7	367795	803497	3.59255e+06	1.82423e+06	1.64303e+06	1.83419e+06	1.04915e+06	956402	3.73011e+06	416827	1.58839e+06	944984	92382.7	1.60456e+06	452008	1.21091e+06	284484	2.56185e+06
M703T575_2	Carmabin A	703.431	575.5	703.431	0.546722	C40H57N5O6	[M]+							BioDeepDB	1	pos	302605	81941	385003	324250	510963	538503	354059	116323	377043	299828	451984	159325	122672	526354	71751.9	620768	305913	478672	740826	313043	487710	499844	193577	599115
M663T576_9	1-Palmitoyl-2-(5-keto-6-octenedioyl)-sn-glycero-3-phosphocholine	663.37	575.9	663.375	6.6328	C32H58NO11P	[M]+			C13900		439904-33-3		BioDeepDB	1	pos	1.78512e+07	1.02622e+07	8.8884e+06	1.36458e+07	1.0277e+07	1.34918e+07	1.38159e+07	1.81669e+07	2.63194e+07	1.92264e+07	1.45694e+07	3.07218e+07	1.79613e+07	1.33524e+07	3.05886e+07	1.08708e+07	2.25441e+07	1.34492e+07	1.02906e+07	1.44864e+07	2.09497e+07	2.00403e+07	1.04909e+07	3.26958e+07
M774T576_22	DHOAA(AcO)-Val-Phe(NMe)-Pro-Phe(NMe)-Gly-OMe	774.434	576	791.447	7.35321	C43H61N5O9	[M+H-H2O]+							BioDeepDB	1	pos	1.08867e+06	2.62478e+06	3.84098e+06	1.48985e+06	4.30712e+06	2.64281e+06	2.3901e+06	2.28576e+06	532131	1.44267e+06	1.74782e+06	1.06203e+06	2.56807e+06	2.19556e+06	283745	3.35267e+06	1.75733e+06	2.2002e+06	4.35121e+06	1.38337e+06	1.03852e+06	1.02195e+06	3.11895e+06	401965
M929T576_17	Neu5Acalpha2-3[GalNAcbeta1-4]Galbeta1-4GlcNAcbeta-Sp	929.319	576.1	946.35	25.6239	C35H58N6O24	[M+H-H2O]+							BioDeepDB	1	pos	809952	252453	671623	1.33252e+06	366086	458793	376070	223289	201138	781802	127478	216452	1.16481e+06	667932	269077	718356	386904	221277	589180	971514	803595	751842	613084	569984
M201T577	Ethyl-L-NIO	201.147	577.2	201.148	2.61931	C9H19N3O2	[M]+					150403-97-7		BioDeepDB	1	pos	1.17161e+06	670523	1.08681e+06	650584	1.29045e+06	1.63258e+06	3.61269e+06	1.19326e+06	658295	516867	701004	432212	861881	321966	1.47258e+06	1.32686e+06	340020	1.27478e+06	849843	609368	476804	385948	554672	408478
M292T770	Terbinafine	292.211	769.8	291.199	17.7953	C21H25N	[M+H]+	Naphthalenes		C08079		91161-71-6/78628-80-5	HMDB0014995	BioDeepDB	1	pos	978978	1.07615e+06	1.71192e+06	3.30549e+06	1.68404e+06	1.18305e+06	3.08893e+06	988482	5.64404e+06	4.71253e+06	2.78522e+06	2.99771e+06	2.80387e+06	3.09454e+06	4.09547e+06	3.2047e+06	2.1492e+06	1.8042e+06	1.46411e+06	2.41973e+06	1.76053e+06	2.29623e+06	2.20916e+06	2.59629e+06
M469T618	Tumonoic Acid G	469.303	618.1	469.304	2.03011	C25H43NO7	[M]+							BioDeepDB	1	pos	180056	142112	295569	69988.9	231735	248056	249808	258219	274954	219832	258191	237872	216954	209772	289184	272559	302513	365305	249215	256035	259534	227968	226633	299944
M917T736_2	Tylosin	916.529	736.2	915.519	2.64476	C46H77NO17	[M+H]+	Macrolides and analogues		C01457	Global and overview maps; Metabolism of terpenoids and polyketides	1401-69-0	HMDB0034108	BioDeepDB	1	pos	1.20959e+06	809449	488504	703258	973757	659192	507501	1.01768e+06	333640	296912	413892	527473	536239	1.09757e+06	775109	639151	638136	787290	766115	682079	352966	1.06414e+06	421489	481754
M280T584	12S-HHTrE	280.212	584.5	280.204	29.103	C17H28O3	[M]+					54397-84-1		BioDeepDB	1	pos	324083	191315	267631	196921	231841	173838	339017	330752	251650	291651	295766	318006	265716	219297	192214	243460	299453	293706	310082	307326	251877	287889	256168	207888
M780T592	4-O-[(2E)-3-(4-Hydroxyphenyl)-2-propenoyl]-?-D-fructofuranosyl 2,6-bis-O-[(2E)-3-(4-hydroxyphenyl)-2-propenoyl]-?-D-glucopyranoside	780.204	592.1	780.227	28.7604	C39H40O17	[M]+							BioDeepDB	1	pos	236114	126427	81793.1	39866.5	66509.5	61044.6	124861	58086	118736	47966	128562	140872	169317	110223	122590	60691	112831	233494	107231	85696.4	90579.2	122228	136127	98281.8
M308T838_1	Tolterodine	308.229	838.2	325.241	12.2182	C22H31NO	[M+H-H2O]+	Benzene and substituted derivatives	Diphenylmethanes	C07750		124937-51-5	HMDB0015170	BioDeepDB	1	pos	1.43155e+06	2.09923e+06	2.66017e+06	2.33473e+06	1.28524e+06	1.40529e+06	1.49973e+06	1.24791e+06	2.36384e+06	1.00637e+06	1.96878e+06	1.34642e+06	1.03936e+06	1.97986e+06	3.18312e+06	1.33841e+06	2.99401e+06	2.70284e+06	3.07641e+06	1.28355e+06	1.3836e+06	2.08989e+06	1.86651e+06	2.4712e+06
M225T602	Prometon	225.16	602.5	225.159	3.1089	C10H19N5O	[M]+			C14186		1610-18-0		BioDeepDB	1	pos	347914	316156	390410	187694	227158	228159	171538	392518	286006	238295	650511	383149	157574	216549	269539	156082	445044	402820	323671	180269	481918	380884	501080	326968
M342T781	CAY10580	342.262	780.7	341.257	4.04547	C19H35NO4	[M+H]+					64054-40-6		BioDeepDB	1	pos	9.38022e+06	5.26425e+06	9.2093e+06	7.72143e+06	2.41106e+07	4.06183e+06	2.6526e+07	1.89028e+07	1.06529e+07	5.56107e+06	1.20217e+07	1.63775e+07	1.65468e+07	7.1364e+06	2.57746e+06	1.54947e+07	1.57999e+07	1.53017e+07	1.30514e+07	1.26452e+07	7.30849e+06	7.7438e+06	1.31389e+07	9.62325e+06
M365T619_1	N-cis-octadec-9Z-enoyl-L-Homoserine lactone	365.29	619.3	365.293	9.01783	C22H39NO3	[M]+							BioDeepDB	1	pos	5.11834e+06	2.65057e+06	7.16914e+06	9.53716e+06	5.97085e+06	1.15834e+07	8.01268e+06	1.67344e+07	8.11613e+06	6.245e+06	1.2387e+07	1.45474e+07	4.66703e+06	6.73636e+06	1.54316e+07	4.49421e+06	1.37775e+07	7.9299e+06	1.62149e+07	7.43556e+06	1.19807e+07	1.1782e+07	6.11243e+06	1.10958e+07
M152T620	Mercaptopurine	152.017	620.1	152.016	6.57822	C5H4N4S	[M]+	Imidazopyrimidines	Purines and purine derivatives	C02380	Xenobiotics biodegradation and metabolism; Digestive system	50-44-2	HMDB0015167	BioDeepDB	1	pos	5.21735e+06	904065	790052	7.28592e+06	543166	682392	1.97493e+06	3.81119e+06	1.2855e+07	8.6543e+06	6.40752e+06	1.20615e+07	4.51965e+06	4.51763e+06	1.67349e+07	1.45375e+06	7.20187e+06	1.78233e+06	199876	8.68329e+06	7.40196e+06	5.49915e+06	1.96553e+06	1.50704e+07
M262T621	QX-314	262.202	620.8	262.205	11.1115	C16H26N2O	[M]+					24003-58-5		BioDeepDB	1	pos	210067	830083	72090.5	221701	186079	127676	113833	277451	334243	313267	484927	359389	181548	186036	318258	72622.6	203576	63822.6	104321	144229	345522	160031	313849	126165
M889T623_18	Galalpha1-3[Fucalpha1-2]Galbeta1-4[Fucalpha1-3]GlcNAcbeta-Sp	889.341	622.9	906.344	5.21194	C34H58N4O24	[M+H-H2O]+							BioDeepDB	1	pos	445518	1.06816e+06	602126	1.10189e+06	967375	1.70484e+06	1.12773e+06	691810	1.0276e+06	1.19725e+06	1.15124e+06	921696	1.26315e+06	1.05978e+06	947852	1.23727e+06	1.61551e+06	1.56928e+06	2.0523e+06	1.77494e+06	1.29763e+06	956027	787614	921646
M889T623_16	Balletetroside	889.296	623	888.29	1.5745	C39H52O23	[M+H]+							BioDeepDB	1	pos	1.59131e+06	1.07818e+06	1.44266e+06	2.25235e+06	2.50348e+06	1.56618e+06	1.65574e+06	2.02932e+06	1.56009e+06	1.19913e+06	1.4816e+06	1.83109e+06	1.32643e+06	1.74825e+06	3.44477e+06	1.97934e+06	3.45185e+06	2.22471e+06	2.79394e+06	2.18107e+06	1.47211e+06	1.32353e+06	2.12292e+06	1.76253e+06
M111T629	5-Methyl-2-furancarboxaldehyde	111.044	628.7	110.037	4.2866	C6H6O2	[M+H]+	Carbonyl compounds	Aldehydes	C11115		620-02-0	HMDB0033002	BioDeepDB	1	pos	1.18507e+06	698503	2.03566e+06	676623	702311	1.54745e+06	789717	1.59861e+06	1.46237e+06	706319	1.12121e+06	718301	582263	1.249e+06	1.15246e+06	95424.9	3.01454e+06	2.36936e+06	1.13881e+06	947286	863899	745041	888945	1.20757e+06
M407T634	Stypoltrione	407.258	634.4	424.261	10.741	C27H36O4	[M+H-H2O]+							BioDeepDB	1	pos	1.77343e+06	1.2036e+06	1.41174e+06	1.65679e+06	1.76885e+06	2.65987e+06	1.59693e+06	1.63021e+06	1.5945e+06	1.17743e+06	2.24601e+06	866807	2.14976e+06	1.95806e+06	3.69086e+06	1.09502e+06	2.99201e+06	1.2781e+06	2.88556e+06	1.76247e+06	1.09784e+06	1.00069e+06	2.1018e+06	2.0463e+06
M939T635_2	Galbeta1-3GalNAcbeta1-3Galalpha1-4Galbeta1-4Glcbeta-Sp	939.349	634.8	938.334	7.97995	C34H58N4O26	[M+H]+							BioDeepDB	1	pos	2.97302e+06	4.53719e+06	4.90144e+06	3.65875e+06	4.5785e+06	4.97328e+06	4.73196e+06	4.37697e+06	1.76634e+06	1.36037e+06	3.50723e+06	2.0133e+06	4.04132e+06	1.41783e+06	1.89993e+06	2.10384e+06	1.02792e+06	3.99665e+06	4.46911e+06	3.19162e+06	1.49471e+06	3.26798e+06	895622	1.33637e+06
M823T635_1	1-Stearoyl-2-Docosahexaenoyl-sn-Glycero-3-[Phospho-rac-(1-glycerol)]	822.542	634.8	822.541	1.14718	C46H79O10P	[M]+							BioDeepDB	1	pos	1.1511e+07	9.5547e+06	6.72583e+06	6.63749e+06	1.23138e+07	6.7463e+06	9.27996e+06	1.20605e+07	7.01285e+06	7.83193e+06	1.12913e+07	8.59951e+06	9.5127e+06	8.88548e+06	8.22783e+06	7.38714e+06	7.95095e+06	1.34621e+07	8.17961e+06	1.22888e+07	6.51569e+06	1.0764e+07	8.93527e+06	6.58317e+06
M839T671_13	RSC-3388	839.301	671	838.3	7.3871	C49H44F2N4O5S	[M+H]+					337307-06-9		BioDeepDB	1	pos	1.02348e+06	1.40062e+06	1.59787e+06	1.25118e+06	2.822e+06	4.06286e+06	1.94281e+06	1.0158e+06	214299	231258	733744	100226	1.18666e+06	1.9764e+06	92872.1	1.17681e+06	443620	1.10711e+06	2.23047e+06	678522	458505	259611	1.2786e+06	162767
M823T635_21	Virginiamycin	823.33	635.1	823.354	29.1499	C43H49N7O10	[M]+	Carboxylic acids and derivatives	Amino acids, peptides, and analogues	C11269		11006-76-1/23152-29-6	HMDB0030520	BioDeepDB	1	pos	588699	545116	591173	212225	560938	743559	558317	556980	65668.8	191308	303559	66053.9	722614	493955	16054.7	724524	368756	560837	577177	237960	649672	590848	583169	64475.9
M334T643	2,3-dinor-6-keto Prostaglandin F1alpha-d9	334.259	643.1	351.261	1.49585	C18H21D9O6	[M+H-H2O]+							BioDeepDB	1	pos	706863	908427	264210	396096	315086	310266	304224	354672	334903	481613	514494	836305	784434	357215	1.39014e+06	799822	479842	267151	1.05223e+06	401183	162938	300564	167850	250763
M307T739	BUTACAINE	307.241	739.5	306.231	9.0997	C18H30N2O2	[M+H]+					149-15-5		BioDeepDB	1	pos	1.00134e+06	746020	970017	585923	588870	298596	763114	1.02952e+06	1.1484e+06	867038	1.67605e+06	992855	1.09507e+06	794418	614895	648504	1.13713e+06	1.06065e+06	1.51174e+06	1.20861e+06	1.25085e+06	1.3625e+06	1.69017e+06	1.24597e+06
M757T648_9	Diadenosine triphosphate	757.087	647.8	756.082	3.5346	C20H27N10O16P3	[M+H]+	(5'->5')-dinucleotides		C06197	Global and overview maps; Nucleotide metabolism	56432-02-1/5959-90-0	HMDB0001155	BioDeepDB	1	pos	544399	117277	468106	415168	383303	319517	559423	446605	413294	168722	295005	431189	202285	387171	199605	419022	625496	595743	499320	243880	205604	418485	161532	376063
M570T649	PKC 412	570.215	649.3	570.227	20.3528	C35H30N4O4	[M]+					120685-11-2		BioDeepDB	1	pos	1.29734e+06	380999	898844	996026	1.1359e+06	579085	815765	611994	761423	1.01006e+06	567266	601648	523651	519966	1.34286e+06	830768	652113	1.21474e+06	814400	874848	816971	1.01566e+06	564943	592997
M654T651_2	Palmyramide A	654.377	650.6	671.378	8.94545	C36H53N3O9	[M+H-H2O]+							BioDeepDB	1	pos	34670.5	94950	109833	39702.8	106209	331656	65405.6	246494	93488.6	440562	385966	361400	254642	284124	264381	235907	304123	109249	248582	333027	300758	155524	191484	537608
M143T652	Hydralazine	143.07	652.2	160.075	20.5074	C8H8N4	[M+H-H2O]+	Diazanaphthalenes	Benzodiazines	C07040		86-54-4	HMDB0015400	BioDeepDB	1	pos	257823	186721	414490	362405	247343	139401	1.26204e+06	686668	301086	286141	655945	502062	644076	358097	300550	424358	379771	491950	403678	978989	235619	228940	655868	413447
M347T654	Quinestrol	347.23	653.8	364.24	7.38991	C25H32O2	[M+H-H2O]+	Steroids and steroid derivatives	Estrane steroids	C07619		152-43-2	HMDB0015579	BioDeepDB	1	pos	584972	360422	436291	150149	469975	1.29682e+06	475588	459229	253447	385326	372139	271724	645178	465264	199080	650176	319536	2.38435e+06	479302	413335	568011	358891	482418	198060
M199T655	Guanethidine	199.188	655.4	198.184	17.4508	C10H22N4	[M+H]+	Organonitrogen compounds	Guanidines	C07036		645-43-2/55-65-2	HMDB0015301	BioDeepDB	1	pos	245124	263145	41838.9	153881	122526	447047	67536.7	133694	74155	257086	94003.3	139356	284237	92661.9	153820	173929	122793	213405	116027	135995	130286	172891	187816	141050
M850T668_2	alpha-Solanine	850.489	668.3	867.498	1.48855	C45H73NO15	[M+H-H2O]+	Steroids and steroid derivatives	Steroidal glycosides	C10820	Chemical structure transformation maps	20562-02-1	HMDB0034202	BioDeepDB	1	pos	3.85125e+06	1.97205e+06	2.90655e+06	4.84423e+06	2.6125e+06	364922	1.31403e+06	2.09581e+06	3.94172e+06	4.77905e+06	4.02061e+06	3.04533e+06	3.11136e+06	743934	6.88288e+06	4.15307e+06	2.04538e+06	3.89776e+06	4.81857e+06	6.10957e+06	4.95475e+06	6.20452e+06	2.75192e+06	1.1709e+06
M415T676	Diltiazem	415.168	676.2	414.161	0.423924	C22H26N2O4S	[M+H]+	Benzothiazepines		C06958		42399-41-7	HMDB0014487	BioDeepDB	1	pos	1.41055e+06	440821	1.29557e+06	1.32036e+06	1.66959e+06	2.36629e+06	1.295e+06	982961	1.19869e+06	556143	1.66685e+06	1.45837e+06	1.06625e+06	902483	775822	1.05643e+06	1.04014e+06	1.98529e+06	1.6759e+06	1.31972e+06	1.41437e+06	1.21756e+06	373397	1.16898e+06
M288T677	Cytidine 2',3'-cyclic phosphate	288.034	676.9	305.041	0.512908	C9H12N3O7P	[M+H-H2O]+	Pyrimidine nucleotides	Cyclic pyrimidine nucleotides			15718-51-1	HMDB0011691	BioDeepDB	1	pos	498479	379741	468220	440615	451767	260399	576810	605960	732061	549361	536141	510023	508787	474340	478542	446833	686723	344257	459726	631465	657736	736948	477095	483398
M760T680_14	Neu5Gcalpha2-3Galbeta1-3GlcNAcbeta-Sp	760.276	680	759.266	3.28828	C27H45N5O20	[M+H]+					615554-62-6		BioDeepDB	1	pos	3.29897e+06	1.34119e+06	1.74565e+06	3.00531e+06	932092	743910	2.66431e+06	3.02847e+06	3.7309e+06	3.20798e+06	3.24888e+06	4.09019e+06	2.94261e+06	3.0417e+06	1.78411e+06	2.51798e+06	2.02742e+06	2.44534e+06	1.24533e+06	3.44676e+06	2.26564e+06	3.4949e+06	1.53328e+06	4.3998e+06
M291T745	Sclareol	291.272	745.1	308.272	10.643	C20H36O2	[M+H-H2O]+	Prenol lipids	Diterpenoids	C09183	Global and overview maps; Metabolism of terpenoids and polyketides	515-03-7	HMDB0036827	BioDeepDB	1	pos	505622	939947	1.28381e+06	516423	694009	842953	1.23642e+06	759902	424108	592834	286415	658347	955669	781703	199616	1.3401e+06	438726	2.16728e+06	1.29863e+06	1.53336e+06	601964	602406	2.34973e+06	470929
M349T772	20-Carboxy-leukotriene B4	349.198	771.8	366.204	3.53381	C20H30O6	[M+H-H2O]+	Fatty Acyls	Fatty acids and conjugates	C05950	Lipid metabolism	80434-82-8	HMDB0006059	BioDeepDB	1	pos	888051	959344	1.48398e+06	901453	1.49875e+06	1.70135e+06	1.13496e+06	1.41591e+06	2.50723e+06	3.08698e+06	2.40817e+06	2.24801e+06	2.23968e+06	1.33416e+06	1.3252e+06	1.98426e+06	3.06844e+06	1.34946e+06	2.65006e+06	2.29787e+06	1.96436e+06	2.83916e+06	1.76187e+06	4.09353e+06
M510T687_1	PHYSALIN B	510.19	687	510.189	1.01422	C28H30O9	[M]+							BioDeepDB	1	pos	2.4177e+06	956800	1.19894e+06	1.55939e+06	3.82164e+06	961071	1.0722e+06	1.1889e+06	6.22071e+06	629419	2.52265e+06	1.46305e+06	1.54264e+06	2.34713e+06	2.04098e+06	1.6983e+06	942653	2.54583e+06	588815	1.39018e+06	1.74347e+06	1.96603e+06	1.43829e+06	3.05928e+06
M510T687_2	Gliquidone	510.203	687	527.209	3.38101	C27H33N3O6S	[M+H-H2O]+					33342-05-1		BioDeepDB	1	pos	938963	520206	1.0297e+06	1.09349e+06	1.13458e+06	457772	885036	1.17417e+06	954004	593902	1.20497e+06	1.08484e+06	640424	754059	1.39561e+06	1.0658e+06	1.24117e+06	625447	566070	1.7558e+06	1.33989e+06	1.00932e+06	1.27818e+06	790878
M269T808	N1,N12-Diacetylspermine	269.23	807.7	286.237	1.98343	C14H30N4O2	[M+H-H2O]+	Carboximidic acids and derivatives	Carboximidic acids	C03413		61345-83-3	HMDB0002172	BioDeepDB	1	pos	331497	165728	1.06523e+06	667216	840154	1.99447e+06	372833	857027	922716	844320	875225	1.40506e+06	686041	501024	442813	369152	371087	792564	900811	773274	981899	886578	838514	460651
M503T693	Plerixafor	503.46	693.2	502.447	11.8783	C28H54N8	[M+H]+					155148-31-5		BioDeepDB	1	pos	47861.5	33114.6	35938.2	38426.1	53018.9	36856.2	47529.4	39992.5	43201.9	41044.4	41287.5	50568	47233	31423.3	16433.8	42201	31732.3	43265	36537.7	45408.6	51746.1	52153.2	38837.1	28496.1
M324T694	14,15-EE-8(Z)-E	324.274	694	324.266	21.7563	C20H36O3	[M]+					519038-93-8		BioDeepDB	1	pos	5.27316e+06	3.68607e+06	4.74446e+06	4.03994e+06	5.97208e+06	3.13791e+06	4.67585e+06	4.5869e+06	6.04775e+06	4.39699e+06	5.29143e+06	3.58177e+06	4.46865e+06	3.15516e+06	3.94405e+06	5.13068e+06	3.57573e+06	4.6707e+06	1.87999e+06	4.25204e+06	7.06167e+06	6.72451e+06	3.74406e+06	2.21633e+06
M486T767_1	Prostaglandin E2 p-acetamidophenyl ester	486.284	767.1	485.278	2.08517	C28H39NO6	[M+H]+					57790-52-0		BioDeepDB	1	pos	9.64559e+07	2.82826e+07	8.82685e+07	1.3388e+08	1.1618e+08	7.85101e+07	7.9622e+07	1.3307e+08	6.08006e+07	1.41257e+08	7.62441e+07	9.61123e+07	1.66497e+08	1.08174e+08	1.05798e+08	5.16761e+07	1.33274e+08	5.47876e+07	3.27127e+07	8.91506e+07	1.07597e+08	7.78955e+07	9.64368e+07	7.83121e+07
M349T697	2-Hydroxy-6-pentadecylbenzoic acid	349.276	697.3	348.266	8.01657	C22H36O3	[M+H]+	Benzene and substituted derivatives	Benzoic acids and derivatives	C10759		16611-84-0	HMDB0029683	BioDeepDB	1	pos	1.22925e+06	218408	1.51691e+06	2.21402e+06	1.63994e+06	563611	412437	1.1245e+06	1.89134e+06	2.03835e+06	4.46867e+06	994747	4.52724e+06	2.47671e+06	1.68959e+06	1.59276e+06	3.79391e+06	1.46503e+06	5.6063e+06	1.80085e+06	1.78842e+06	1.20194e+06	2.22404e+06	1.99699e+06
M471T707_2	Terfenadine	471.318	706.6	471.314	9.54769	C32H41NO2	[M]+	Benzene and substituted derivatives	Diphenylmethanes	C07463		50679-08-8	HMDB0014486	BioDeepDB	1	pos	67434.3	76144.4	73544.7	114052	88684.9	93901.3	78816.7	35143.6	66496.4	33874.2	40767.3	42897.1	42896	44726.4	112050	62929.1	148084	97839.7	133497	53731.8	73781	86311.6	62443.3	82767.7
M644T773_2	8-iso Prostaglandin A2-biotin	644.399	773.4	644.397	2.57354	C35H56N4O5S	[M]+							BioDeepDB	1	pos	5.50304e+06	5.64621e+06	4.60388e+06	3.79251e+06	3.75382e+06	3.79887e+06	5.50088e+06	6.20439e+06	4.46599e+06	3.53751e+06	6.54172e+06	4.96748e+06	6.53685e+06	7.70488e+06	3.17662e+06	4.10973e+06	6.2347e+06	5.7183e+06	3.74974e+06	7.23832e+06	6.43376e+06	6.33861e+06	6.46879e+06	3.69129e+06
M374T742	2-thio-Acetyl MAGE	374.288	742.3	374.285	7.57197	C21H42O3S	[M]+					112014-15-0		BioDeepDB	1	pos	2.02581e+06	1.6116e+06	2.40583e+06	1.10334e+06	3.52378e+06	2.5786e+06	2.13033e+06	1.61435e+06	2.50254e+06	2.87638e+06	1.93208e+06	3.28022e+06	2.5643e+06	2.98644e+06	3.47618e+06	2.22684e+06	2.13838e+06	2.31938e+06	2.69809e+06	2.63239e+06	1.5343e+06	2.07671e+06	3.07273e+06	2.63655e+06
M330T718	1-Hexadecyl-2-O-methyl-glycerol	330.312	718.4	330.313	5.08066	C20H42O3	[M]+					111188-59-1		BioDeepDB	1	pos	442487	238179	522761	455989	347077	305739	393998	336620	219303	215738	338920	243403	290788	222653	634383	225060	379779	394045	792615	334270	260572	374079	322963	360578
M385T721	Oleoyl Oxazolopyridine	385.277	720.7	384.278	21.6842	C24H36N2O2	[M+H]+					288862-58-8		BioDeepDB	1	pos	1.89405e+06	960799	1.22668e+06	1.28246e+06	696240	236109	1.27206e+06	1.6553e+06	969816	1.64431e+06	1.04951e+06	1.09384e+06	1.66182e+06	1.13475e+06	1.20825e+06	1.3387e+06	1.69753e+06	1.24482e+06	1.06201e+06	1.64351e+06	1.17812e+06	1.91984e+06	887095	1.49374e+06
M420T725	17-phenyl trinor Prostaglandin F2alpha ethyl amide-d4	420.304	724.7	419.297	1.76458	C25H33D4NO4	[M+H]+							BioDeepDB	1	pos	1.03767e+06	427003	534869	196387	350069	417180	382512	1.51857e+06	916719	528923	1.00111e+06	495464	414264	1.3007e+06	383267	231851	908988	1.06612e+06	364421	614396	1.07347e+06	1.08779e+06	376204	323351
M401T826	20a,22b-Dihydroxycholesterol	401.343	826.4	418.345	3.48828	C27H46O3	[M+H-H2O]+	Steroids and steroid derivatives	Bile acids, alcohols and derivatives	C05501	Lipid metabolism; Global and overview maps	15234-55-6/596-94-1	HMDB0006763	BioDeepDB	1	pos	3.80729e+07	3.91384e+07	4.25075e+07	4.40676e+07	4.37386e+07	3.86494e+07	1.80676e+07	4.81053e+07	1.97119e+07	4.07995e+07	4.0797e+07	3.44769e+07	5.45873e+07	4.54364e+07	2.53018e+07	2.19317e+07	4.39068e+07	2.25168e+07	4.85712e+07	1.63788e+07	4.45576e+07	5.00693e+07	1.84847e+07	2.5598e+07
M364T731	11-deoxy-16,16-dimethyl-PGE2	364.263	731.5	364.261	3.67965	C22H36O4	[M]+					53658-98-3		BioDeepDB	1	pos	489394	129685	423782	199860	456615	159608	666915	524412	678008	142413	1.4928e+06	910036	766131	480027	403820	484585	832674	922163	420300	930775	326297	281387	1.06887e+06	421576
M409T732	PGF2alpha diethyl amide	409.315	731.6	409.319	9.30546	C24H43NO4	[M]+							BioDeepDB	1	pos	723999	438201	391676	600209	242382	388450	713354	634401	1.12439e+06	626839	1.30333e+06	550421	1.18987e+06	621796	503557	945779	990459	730056	359774	625573	330905	1.03942e+06	1.11208e+06	493877
M544T735	LY293111	544.232	735.2	544.226	10.4423	C33H33FO6	[M]+					161172-51-6		BioDeepDB	1	pos	291922	250717	390352	352168	324355	163612	378906	439261	501249	384344	240843	178368	276606	330086	330682	311561	393920	461634	223303	217694	352938	159487	285752	328606
M284T740	Trihexyphenidyl	284.236	740.2	301.241	10.6742	C20H31NO	[M+H-H2O]+	Organonitrogen compounds	Amines	C07171		144-11-6	HMDB0014520	BioDeepDB	1	pos	654699	591817	821764	1.29426e+06	888585	1.06656e+06	865294	896300	882205	776895	885389	707624	809051	850290	845338	314304	1.38129e+06	1.09252e+06	1.37677e+06	871371	716380	812175	258774	745746
M127T763	Dimethyl trisulfide	126.972	763	125.963	12.7902	C2H6S3	[M+H]+	Organic trisulfides		C08372		3658-80-8	HMDB0013780	BioDeepDB	1	pos	4.4158e+06	4.98756e+06	5.3329e+06	4.90719e+06	5.41678e+06	3.35059e+06	5.37208e+06	4.51174e+06	6.00866e+06	6.81285e+06	3.26197e+06	3.12346e+06	4.08159e+06	9.03663e+06	5.27583e+06	5.74942e+06	7.46421e+06	5.11436e+06	7.36376e+06	5.67026e+06	8.39783e+06	3.29235e+06	7.03422e+06	7.73675e+06
M277T741	PERHEXILINE	277.283	741.1	277.277	22.1791	C19H35N	[M]+					6724-53-4		BioDeepDB	1	pos	323064	745526	489929	92747.9	358235	355496	493442	451650	466156	607760	697022	399930	583074	228596	502124	504590	686685	614437	538962	635297	654083	654940	586933	510831
M342T742	5-Hydroxymethyltolterodine	342.242	741.9	341.235	3.08332	C22H31NO2	[M+H]+					207679-81-0		BioDeepDB	1	pos	5.09951e+06	2.3332e+06	4.13246e+06	5.51186e+06	3.01967e+06	4.1988e+06	3.73698e+06	5.99297e+06	3.64048e+06	3.93368e+06	9.37279e+06	2.43632e+06	5.10357e+06	5.79058e+06	3.88356e+06	5.91609e+06	7.13115e+06	5.81534e+06	1.56942e+07	6.08002e+06	6.40685e+06	2.94658e+06	3.53323e+06	2.53453e+06
M531T779	4a,7b-Dihydroxy-3-(hydroxymethyl)-1,1,6,8-tetramethyl-5-oxo-1,1a,1b,4,4a,5,7a,7b,8,9-decahydro-9aH-cyclopropa[3,4]benzo[1,2-e]azulen-9a-yl laurate	531.367	778.9	530.361	2.2508	C32H50O6	[M+H]+							BioDeepDB	1	pos	3.81681e+06	3.46939e+06	2.1702e+06	5.90434e+06	2.38886e+06	2.87107e+06	2.05253e+06	4.58429e+06	2.40846e+06	5.01824e+06	3.44792e+06	1.85587e+06	2.41794e+06	4.47774e+06	5.14191e+06	4.62485e+06	3.53898e+06	5.74104e+06	4.20308e+06	3.5025e+06	3.51706e+06	3.7764e+06	1.93148e+06	2.24202e+06
M390T443_3	AM1248	390.259	443.5	390.267	22.0718	C26H34N2O	[M]+	Drugs of Abuse/Illegal Drugs				335160-66-2		mzCloud	1	pos	753151	956930	627550	1.51824e+06	831204	817854	651544	523409	610396	796865	716111	546677	77925.2	582421	630311	396418	68505.1	305554	220722	230573	37558.1	68877.8	435315	568928
M970T768_2	Dolastatin 12	969.593	767.5	968.595	8.66342	C50H80N8O11	[M+H]+							BioDeepDB	1	pos	3.6148e+06	2.61682e+06	5.09217e+06	2.19444e+06	2.14589e+06	2.32879e+06	3.68498e+06	1.81275e+06	1.50092e+06	806950	1.77569e+06	1.76118e+06	700865	235694	639849	1.03137e+06	2.45818e+06	2.93015e+06	1.44594e+06	3.68103e+06	2.01828e+06	1.51086e+06	1.47358e+06	4.1903e+06
M411T768	ROSAVIN	411.165	767.8	428.168	0.729634	C20H28O10	[M+H-H2O]+					84954-92-7		BioDeepDB	1	pos	5.42707e+06	3.6827e+06	4.90664e+06	977614	5.62805e+06	1.994e+06	5.65574e+06	6.46935e+06	3.25225e+06	582111	3.61625e+06	5.30407e+06	5.28678e+06	2.01278e+06	3.57753e+06	2.26405e+06	2.85006e+06	4.77281e+06	1.42434e+06	3.21721e+06	2.66799e+06	2.62299e+06	4.8477e+06	6.23922e+06
M300T814	3-Dehydrosphinganine	300.289	814	299.282	1.91815	C18H37NO2	[M+H]+	Organooxygen compounds	Carbonyl compounds	C02934	Lipid metabolism; Global and overview maps	16105-69-4	HMDB0001480	BioDeepDB	1	pos	5.05801e+06	3.64755e+06	6.89259e+06	4.20145e+06	4.72336e+06	3.81646e+06	5.10545e+06	6.32727e+06	4.90939e+06	4.63129e+06	5.11183e+06	3.99864e+06	7.54359e+06	5.12453e+06	3.21696e+06	4.17884e+06	8.78765e+06	5.12466e+06	8.17206e+06	7.81362e+06	9.22425e+06	4.19675e+06	3.91874e+06	6.47252e+06
[truncated: 5,879 more rows]
