# Supplementary material for: The impact of dapagliflozin for the myocardial metabolomic profiles of mice with chronic heart failure induced by a high fat diet
Source: Research Square preprint supplement (doi:10.21203/rs.3.rs-6881055/v1), 2025-06-25
Supplement: Supplementary file 6 [file 37603935edf6619b4943e4c5.xlsx]

## Sheet: pvalue_all
Name	Class	MainIon	Mass-to-charge ratio	Retention times(min)	IonFormula	VIP	mean_HDF	sd_HDF	mean_Chow	sd_Chow	Fold Change_HDF/Chow	log2(FC_HDF/Chow)	P.value	FDR	HDF1	HDF3	HDF4	HDF5	HDF6	HDF7	HDF8	HDF2	Chow1	Chow2	Chow3	Chow4	Chow5	Chow6	Chow7	Chow8
AEA(18:1)	AEA	M+NH4	343.332	3.04735	C20 H43 O2 N2	0.0362291	2691.83	4100.84	92.737	262.3	29.026	4.8593	0.110465	0.166983	4.07469e-06	4966.67	4996.96	4.07469e-06	4.07469e-06	4.07469e-06	11221.7	349.312	4.07469e-06	4.07469e-06	4.07469e-06	741.896	4.07469e-06	4.07469e-06	4.07469e-06	4.07469e-06
AcCa(10:0)	AcCa	M+H	316.248	1.21888	C17 H34 O4 N1	0.0681258	19143.6	6342.98	29287.9	16911.9	0.65364	-0.61344	0.318425	0.399191	20886.2	13548	9785.94	26683.5	22642.3	12233	24586.7	22783	18853.6	12710.6	23053.1	23552	40791.4	10656.8	53778.9	50906.8
AcCa(10:1)	AcCa	M+H	314.233	1.16106	C17 H32 O4 N1	0.089964	31670.5	9880.21	46539.4	18985.8	0.68051	-0.55531	0.127808	0.186204	46567.7	24717	20495.6	41162.7	37920.8	19664.9	34133.1	28702.4	31030.8	28388.5	56059.4	29635.3	75328.1	29688.5	56590	65594.9
AcCa(10:3)	AcCa	M+H	310.201	1.03345	C17 H28 O4 N1	0.0513669	40111	13112.8	32710.3	11585.6	1.2262	0.29425	0.103562	0.156612	62877.9	53271.5	21264.5	41772.4	34515.7	32549.5	32315.8	42320.2	31657.1	30805.9	21277.9	31283.3	56341	19546.1	40681.2	30089.6
AcCa(12:0)	AcCa	M+H	344.28	1.49008	C19 H38 O4 N1	0.150666	73200.2	26849.7	119819	72222.4	0.61092	-0.71094	0.430897	0.508992	88785.6	48520.2	38967.1	113150	72579.3	43944.9	86886.5	92768.7	77290.8	34313.2	146085	71073.2	213557	41937.2	201428	172867
AcCa(12:1)	AcCa	M+H	342.264	1.37577	C19 H36 O4 N1	0.131927	62794.4	35900.3	99060.8	49316.5	0.6339	-0.65768	0.156254	0.220027	4.07469e-06	56474.6	59304.4	63836.3	116911	32205.7	84866.3	88757.4	105267	44304.5	83958.4	188049	32715.6	93872.6	135301	109019
AcCa(13:0)	AcCa	M+H	358.295	1.6039	C20 H40 O4 N1	0.0774721	5222.44	4362.08	14881.7	10813.1	0.35093	-1.5107	0.0520296	0.0879514	13250.9	2285.89	1768.81	5906	1758.84	1137.46	6196.1	9475.49	2120.96	4566.77	12532.6	9929.99	28801.9	7867.97	25982.1	27251.5
AcCa(14:0)	AcCa	M+H	372.311	2.05231	C21 H42 O4 N1	0.267113	204998	69235.9	336362	176520	0.60946	-0.7144	0.156254	0.220027	297296	145387	193707	265764	235790	151588	97478.7	252973	209912	179912	306930	147180	625141	239955	474803	507060
AcCa(14:1)	AcCa	M+H	370.295	1.911	C21 H40 O4 N1	0.213793	54948.5	17367	122956	71236.3	0.4469	-1.162	0.018129	0.0375566	67899	38886.3	51704.3	77424.6	38128.9	57404	33101.4	75039.4	108303	57997	146252	69861.4	263931	52290.6	110147	174865
AcCa(14:2)	AcCa	M+H	368.28	1.72647	C21 H38 O4 N1	0.0907292	18672.9	11891	36342	28403.4	0.51381	-0.96069	0.127808	0.186204	36075.8	11934.9	22522.5	9973.84	10528.8	10499.1	10456.9	37391.3	56968.1	13476	52579.3	13080	88047.3	7835.24	16903.7	41846.6
AcCa(14:3)	AcCa	M+H	366.264	1.2972	C21 H36 O4 N1	0.0871435	10533.5	5387.08	21905.7	11146	0.48085	-1.0563	0.0405689	0.0719971	6870.56	6373.55	6669.61	16602.6	6805.08	6598.87	15930.4	18417	22872.6	11524.2	29615.2	6314.47	19030.1	17072.8	26853.3	41962.9
AcCa(16:0)	AcCa	M+H	400.342	3.12765	C23 H46 O4 N1	0.799019	1.23397e+06	308473	2.08011e+06	693323	0.59322	-0.75336	0.00740553	0.0183503	1.25171e+06	1.00057e+06	1.21499e+06	1.81489e+06	1.48532e+06	874415	1.27721e+06	952631	1.57263e+06	1.55575e+06	2.82018e+06	1.27999e+06	2.51599e+06	1.4174e+06	2.46948e+06	3.00947e+06
AcCa(16:1)	AcCa	M+H	398.326	2.83528	C23 H44 O4 N1	0.318337	124150	37161.1	263452	127470	0.47124	-1.0855	0.0135873	0.0294907	176250	102764	108027	167168	99898.6	89083	89192.6	160817	199292	157471	356827	150463	511088	162110	238449	331914
AcCa(17:0)	AcCa	M+H	414.358	4.052	C24 H48 O4 N1	0.0211021	68073.8	2957.08	72081.4	31636.6	0.9444	-0.082526	0.372029	0.452003	69732.5	69070.6	62765.5	70603.3	70122.3	70031	64218.7	68046.6	96286.9	63133.7	92989.6	85007	74171.5	18853.5	35050	111159
AcCa(17:1)	AcCa	M+H	412.342	2.73239	C24 H46 O4 N1	0.170279	13924.8	9680.9	46051.2	17575.3	0.30238	-1.7256	0.00135938	0.00497765	6542.32	989.067	12604.2	28719.6	23559.5	6847.77	21612.2	10523.5	26877.1	36359.3	60729.9	37998.8	37273.6	33316.2	57343.8	78510.5
AcCa(18:0)	AcCa	M+H	428.373	4.7625	C25 H50 O4 N1	0.0404243	921366	232267	948705	330869	0.97118	-0.042185	0.958122	0.972038	1.22761e+06	1.05289e+06	691928	1.07262e+06	1.08176e+06	524327	852344	867459	752995	602259	974014	798441	1.08102e+06	645414	1.11867e+06	1.61683e+06
AcCa(18:1)	AcCa	M+H	426.358	4.32106	C25 H48 O4 N1	0.157283	152720	44297	203164	69790	0.75171	-0.41176	0.156254	0.220027	225457	161077	140904	174928	104651	116570	103818	194353	214991	111684	226656	188674	311455	103036	210752	258065
AcCa(18:2)	AcCa	M+H	424.342	2.48732	C25 H46 O4 N1	1.37789	896334	452944	2.85593e+06	896921	0.31385	-1.6719	0.00135938	0.00497765	1.06848e+06	489883	844260	1.63554e+06	1.0958e+06	389037	1.26229e+06	385382	2.2204e+06	3.15983e+06	4.11613e+06	2.4528e+06	1.38305e+06	2.46514e+06	3.2362e+06	3.8139e+06
AcCa(18:3)	AcCa	M+H	422.326	2.00281	C25 H44 O4 N1	0.158254	12416.9	4529.92	38150.1	12191.9	0.32548	-1.6194	0.000939106	0.00397777	15731.9	8460.36	10170.1	21118	13702.9	7638.06	13385.3	9128.79	33402.2	22166.6	54222.9	35270.9	35991.3	26207.3	41405.9	56533.9
AcCa(18:4)	AcCa	M+H	420.311	1.85786	C25 H42 O4 N1	0.184721	47195.5	17594.7	11863.9	5034.98	3.9781	1.9921	0.000939106	0.00397777	49288.7	33971.6	26768.2	77006.1	49470.6	33494.7	67962.3	39601.7	11049.5	7430.13	17039.4	4977.08	14898.1	6683.85	18064.1	14769.1
AcCa(19:0)	AcCa	M+H	442.389	5.77865	C26 H52 O4 N1	0.140401	7208.8	2272.9	26603.4	8066.36	0.27097	-1.8838	0.000939106	0.00397777	9467.06	6609.88	4619.4	10083.3	7886.35	3418.08	8128.5	7457.81	20448.6	19147.9	26700.5	25051.8	34756.4	15607.1	33123.5	37991.1
AcCa(19:1)	AcCa	M+H	440.373	3.73803	C26 H50 O4 N1	0.0330688	17525.1	19773	23558.7	21358.5	0.74389	-0.42684	0.563524	0.634285	26968.6	2509.75	11670	16562	62445.4	6461.72	9645.3	3937.77	4140.44	4.07469e-06	12387.9	13070	48687	12963	52321.6	44899.3
AcCa(20:1)	AcCa	M+H	454.389	6.32259	C27 H52 O4 N1	0.0469607	93227.3	41776.7	105984	49258.6	0.87964	-0.18502	0.494837	0.568203	160833	122753	65415.3	126838	82462.8	32697	60214	94605.2	127476	30569.7	136834	35232	114561	95237.6	147594	160368
AcCa(20:2)	AcCa	M+H	452.373	4.50958	C27 H50 O4 N1	0.487283	441529	278079	851025	466332	0.51882	-0.94669	0.0831229	0.13017	1.06505e+06	360151	351751	495288	437392	157220	209396	455982	834838	211901	947511	353516	1.61791e+06	583202	1.27384e+06	985480
AcCa(20:4)	AcCa	M+H	448.342	2.38033	C27 H46 O4 N1	0.0514254	713169	246835	742856	159867	0.96004	-0.05884	0.563524	0.634285	671286	547655	439436	1.01739e+06	694036	413018	870975	1.05156e+06	655273	697814	761721	718733	718177	521096	785643	1.08439e+06
AcCa(20:5)	AcCa	M+H	446.326	2.377	C27 H44 O4 N1	0.00551113	9886.59	18417	10802.2	16032.2	0.91524	-0.12778	0.914128	0.94528	4903.4	4116.13	3503.46	4.07469e-06	4.07469e-06	12222.6	4.07469e-06	54347.1	47335.7	7466.2	17810.7	4.07469e-06	10351.4	3453.55	4.07469e-06	4.07469e-06
AcCa(21:0)	AcCa	M+H	470.42	7.78685	C28 H56 O4 N1	0.21482	38719.9	24862.9	92381.7	28034.7	0.41913	-1.2545	0.0027616	0.00834568	71518.2	29228.3	11253	41260.6	61237.1	15113.6	65885.8	14262.3	81603.2	48282.2	85778.8	73856.6	127769	81843.7	129165	110756
AcCa(21:1)	AcCa	M+H	468.405	5.91155	C28 H54 O4 N1	0.10267	30939.1	20163.9	52743.8	30250.5	0.58659	-0.76957	0.189263	0.257782	51760.2	24228.2	10396.2	56937.7	43423.1	6799.38	42790.9	11176.9	37935	17858.8	46234.3	25852.5	67313.8	35668.9	99806.7	91280.8
AcCa(22:0)	AcCa	M+H	484.436	8.57134	C29 H58 O4 N1	0.251634	208457	118877	320754	98627.5	0.6499	-0.62172	0.0660819	0.107911	346053	199732	102428	366782	243160	73493.8	270258	65748	302160	136610	323210	253708	388476	300336	438740	422793
AcCa(22:1)	AcCa	M+H	482.42	6.92655	C29 H56 O4 N1	0.146783	2.2821e+06	1.45531e+06	2.511e+06	1.57593e+06	0.90884	-0.1379	0.636502	0.703383	3.88047e+06	1.82228e+06	1.28464e+06	4.34154e+06	3.50999e+06	562036	2.09781e+06	758051	2.18328e+06	573058	2.08008e+06	881459	2.67686e+06	2.27444e+06	5.39181e+06	4.027e+06
AcCa(22:2)	AcCa	M+H	480.405	5.30732	C29 H54 O4 N1	0.593535	999840	605548	1.73316e+06	1.07286e+06	0.57689	-0.79364	0.189263	0.257782	1.57633e+06	950100	540262	1.91138e+06	1.4113e+06	178342	1.01885e+06	412153	1.86962e+06	291834	1.77897e+06	486359	1.67139e+06	1.37759e+06	3.16479e+06	3.22472e+06
AcCa(22:3)	AcCa	M+H	478.389	4.07596	C29 H52 O4 N1	0.036063	92215.6	72157.9	80922.9	47442	1.1395	0.18846	1	1	90709.2	77027.1	23792.9	181378	80820.8	15891.8	218097	50007.7	74206.1	21374.5	92412.9	30008.8	85900.6	51827.9	154302	137350
AcCa(22:5)	AcCa	M+H	474.358	2.84617	C29 H48 O4 N1	0.12347	89043.1	33847.8	61443.3	19353.2	1.4492	0.53525	0.0831229	0.13017	91992.5	100814	41130.4	121419	85180.6	54200.4	144291	73316.4	72970.3	41897.7	64261.7	49632.5	71787	35824	95956.6	59216.2
AcCa(22:6)	AcCa	M+H	472.342	2.19584	C29 H46 O4 N1	0.271053	56971.7	17893.4	134421	38378.4	0.42383	-1.2384	0.00135938	0.00497765	49051.9	44196.3	22454.3	78464.5	71593.8	59342.6	66469.6	64200.3	73466.9	99350.2	120950	138848	146568	132262	166288	197636
AcCa(23:0)	AcCa	M+H	498.452	9.38326	C30 H60 O4 N1	0.228214	16521.3	9366.25	70615.9	26693.9	0.23396	-2.0957	0.00135938	0.00497765	34493.2	14817.4	7334.6	18008.3	20752.7	8500.45	21478.2	6785.89	56810.9	32084.2	81878.1	42369.4	97120.5	58362.2	95069.9	101232
AcCa(23:1)	AcCa	M+H	496.436	7.84202	C30 H58 O4 N1	0.129183	8977.65	4359.68	27371.4	10467.5	0.32799	-1.6083	0.00135938	0.00497765	14584.7	7027.65	4003.28	12163.2	10085	3606.75	14046.5	6304.05	18696.2	14464	27136.1	20128.3	34076.9	21684	42415	40370.9
AcCa(24:0)	AcCa	M+H	512.467	10.1528	C31 H62 O4 N1	0.441284	72350.3	42215.2	267253	79467.9	0.27072	-1.8851	0.00135938	0.00497765	163320	64312.2	34075.5	72477.8	85138.5	43322.6	83139.7	33015.8	261113	136605	290339	196365	280350	266390	296357	410508
AcCa(24:1)	AcCa	M+H	510.452	8.59782	C31 H60 O4 N1	0.272736	162218	85904.2	279730	108268	0.57991	-0.78611	0.0520296	0.0879514	270350	114309	119633	284432	215318	60062.9	158898	74737.7	227984	157896	220946	192980	268955	288447	470178	410455
AcCa(24:2)	AcCa	M+H	508.436	7.30535	C31 H58 O4 N1	0.105674	72351.3	46262.6	105779	71152.8	0.68399	-0.54796	0.430897	0.508992	99050.4	60150.6	49539	155747	100555	14618	76766.6	22384.5	129586	21432.6	94250.5	28289.5	68928.1	91888.9	203643	208210
AcCa(8:0)	AcCa	M+H	288.217	1.062	C15 H30 O4 N1	0.079369	8019.72	3432.86	16307.1	6485.85	0.49179	-1.0239	0.0135873	0.0294907	9230.43	6440.69	3250.69	12453	9340.51	4631.41	12493.3	6317.72	11086.7	10380	12941.5	23483.4	21315.6	7359.02	22457.1	21433.3
AcHexSiE(18:0)	AcHexSiE	M+NH4	860.734	19.465	C53 H98 O7 N1	0.151043	107993	186209	35811.3	56554.9	3.0156	1.5925	0.156254	0.220027	37164.9	24869.4	563423	71472.3	2809.16	58270.5	17970.4	87967.2	10227.8	26214.4	11539.4	174752	14662.1	16726.7	7044.93	25323
AcHexStE(18:1)	AcHexStE	M+NH4	856.702	18.199	C53 H94 O7 N1	0.309484	242271	107812	378523	84803.6	0.64004	-0.64376	0.0405689	0.0719971	363133	354087	99394.4	103621	226445	281633	333973	175882	341379	315997	436115	440239	327825	486353	238202	442078
BiotinylPE(29:0)	BiotinylPE	M+H	876.553	11.5072	C44 H83 O10 N3 S1 P1	0.0205772	136731	21562.6	140628	23096.3	0.97229	-0.040539	0.874826	0.905144	144580	117291	131157	101721	156417	170636	139206	132842	103863	130450	152413	128405	120273	165811	157620	166189
BiotinylPE(31:1)	BiotinylPE	M+H	902.569	11.4671	C46 H85 O10 N3 S1 P1	0.222219	301843	150610	202150	57986.7	1.4932	0.57837	0.318425	0.399191	148238	181835	461103	189403	211576	527962	248907	445718	211395	292458	193788	145056	194749	117053	269854	192847
BiotinylPE(33:1)	BiotinylPE	M+H	930.6	12.9215	C48 H89 O10 N3 S1 P1	0.121094	73064.4	18853.3	46240.4	33453.5	1.5801	0.66002	0.0404213	0.0719971	94709.3	60194.5	69627.2	56025.5	98857.9	90884.7	51640.1	62576.5	48142.8	44885.7	93464.8	4.07469e-06	53427	81830.2	4.07469e-06	48172.6
BiotinylPE(36:6)	BiotinylPE	M+H	962.569	2.733	C51 H85 O10 N3 S1 P1	0.0691711	1128.86	2145.54	6892.06	3762.9	0.16379	-2.6101	0.00998472	0.023429	4.07469e-06	4.07469e-06	4.07469e-06	3609.97	4.07469e-06	4.07469e-06	5420.91	4.07469e-06	4963.82	8957.62	5372.6	10655	4856.67	9273.64	4.07469e-06	11057.1
BiotinylPE(40:9)	BiotinylPE	M+Na	1034.57	2.22	C55 H86 O10 N3 S1 P1 Na1	0.0167635	929.648	2629.44	4.07469e-06	0	228150000	27.765	0.381574	0.463143	4.07469e-06	4.07469e-06	7437.18	4.07469e-06	4.07469e-06	4.07469e-06	4.07469e-06	4.07469e-06	4.07469e-06	4.07469e-06	4.07469e-06	4.07469e-06	4.07469e-06	4.07469e-06	4.07469e-06	4.07469e-06
BisMePA(10:1e_10:4)	BisMePA	M+NH4	502.293	2.41033	C25 H45 O7 N1 P1	1.23197	6.39014e+06	1.86463e+06	4.2978e+06	733400	1.4868	0.57225	0.018129	0.0375566	6.54037e+06	4.98509e+06	5.96233e+06	8.94685e+06	8.48833e+06	4.8813e+06	7.64229e+06	3.67453e+06	3.57492e+06	4.53062e+06	3.66074e+06	4.45789e+06	3.89538e+06	4.99733e+06	3.66293e+06	5.60262e+06
BisMePA(28:2)	BisMePA	M+Na	639.4	2.394	C33 H61 O8 N0 P1 Na1	0.070891	4.07469e-06	0	15699.2	41748.2	2.5955e-10	-31.843	0.170904	0.240382	4.07469e-06	4.07469e-06	4.07469e-06	4.07469e-06	4.07469e-06	4.07469e-06	4.07469e-06	4.07469e-06	118856	6737.98	4.07469e-06	4.07469e-06	4.07469e-06	4.07469e-06	4.07469e-06	4.07469e-06
BisMePA(14:0e_18:0)	BisMePA	M+Na	685.514	16.481	C37 H75 O7 N0 P1 Na1	0.407819	150895	69261	326817	68101.8	0.46171	-1.1149	0.0027616	0.00834568	280803	172610	96141.7	111707	108722	113700	97312.7	226163	306385	279834	289040	354137	407278	391470	207312	379079
BisMePA(32:1)	BisMePA	M+Na	697.478	10.0192	C37 H71 O8 N0 P1 Na1	0.055018	9506.26	4255.71	14640.5	5120.77	0.64931	-0.62302	0.0405689	0.0719971	8718.55	12965.5	8341.08	12824.4	16296.6	3821.92	8246.31	4835.67	16887.5	8435.06	13737.2	16654.9	15947	24460.5	11665.8	9336.04
BisMePA(14:0e_18:2)	BisMePA	M+Na	681.483	13.8731	C37 H71 O7 N0 P1 Na1	0.487157	1.52246e+06	155793	1.86074e+06	304033	0.8182	-0.28947	0.0239487	0.0468347	1.62045e+06	1.73749e+06	1.42898e+06	1.43416e+06	1.57388e+06	1.53119e+06	1.62232e+06	1.2312e+06	1.96848e+06	1.55526e+06	2.20572e+06	1.90751e+06	1.64492e+06	2.34826e+06	1.5091e+06	1.74665e+06
BisMePA(16:2e_16:0)	BisMePA	M+NH4	676.528	15.124	C37 H75 O7 N1 P1	0.489902	247071	26925.4	469114	64442.6	0.52668	-0.92501	0.000939106	0.00397777	282956	258510	242442	248983	249322	210640	275358	208357	419639	415559	433459	557536	449618	496631	410751	569716
BisMePA(18:2e_16:0)	BisMePA	M+NH4	704.559	16.3923	C39 H79 O7 N1 P1	0.281014	1.07548e+06	204727	1.25377e+06	258473	0.8578	-0.22128	0.156254	0.220027	1.46044e+06	1.21062e+06	858673	1.1658e+06	1.02057e+06	828187	1.07121e+06	988371	1.46596e+06	892940	1.27518e+06	1.33634e+06	1.13699e+06	1.28647e+06	956075	1.68019e+06
BisMePA(18:3e_16:0)	BisMePA	M+NH4	702.543	15.1615	C39 H77 O7 N1 P1	0.825881	3.09375e+06	253064	3.87031e+06	451179	0.79936	-0.32309	0.00387604	0.0109285	2.79368e+06	3.18005e+06	3.39719e+06	2.8867e+06	2.86517e+06	3.49625e+06	3.06458e+06	3.06642e+06	3.91748e+06	3.90452e+06	3.40344e+06	4.3022e+06	3.35029e+06	4.09651e+06	3.41745e+06	4.57057e+06
BisMePA(16:2e_18:2)	BisMePA	M+NH4	700.528	13.994	C39 H75 O7 N1 P1	0.915688	484732	44999.9	1.29164e+06	313326	0.37529	-1.4139	0.000939106	0.00397777	472868	428427	553086	492608	479180	441440	546312	463935	1.01755e+06	985739	1.34571e+06	1.75122e+06	988921	1.47825e+06	1.09888e+06	1.66682e+06
BisMePA(14:0_20:5)	BisMePA	M+NH4	712.491	11.6056	C39 H71 O8 N1 P1	0.182212	31056.9	7935.37	874.224	2472.68	35.525	5.1508	0.000553535	0.00397777	24564.9	27758.4	37371.5	25405.9	42787.9	25319.1	24242.2	41005.6	4.07469e-06	4.07469e-06	4.07469e-06	4.07469e-06	4.07469e-06	6993.79	4.07469e-06	4.07469e-06
BisMePA(18:2e_18:0)	BisMePA	M+NH4	732.59	17.4929	C41 H83 O7 N1 P1	0.0332101	388445	110732	375756	65861.9	1.0338	0.047914	0.958122	0.972038	601359	366554	266610	427875	397161	264846	455795	327360	390672	306549	405682	388162	289205	423971	319595	482213
BisMePA(16:2e_20:1)	BisMePA	M+NH4	730.575	16.426	C41 H81 O7 N1 P1	0.743883	3.73593e+06	338892	3.0227e+06	506305	1.236	0.30563	0.00538494	0.0143212	4.31487e+06	3.81031e+06	3.53934e+06	4.04622e+06	3.51899e+06	3.35176e+06	3.40814e+06	3.89778e+06	3.20506e+06	2.52599e+06	2.93251e+06	3.15685e+06	2.90849e+06	3.32405e+06	2.23335e+06	3.89527e+06
BisMePA(18:2_18:2)	BisMePA	M+NH4	742.538	13.278	C41 H77 O8 N1 P1	1.37059	3.74127e+06	529442	6.22318e+06	2.14971e+06	0.60118	-0.73412	0.00387604	0.0109285	4.36918e+06	3.35934e+06	4.41203e+06	3.45694e+06	3.92689e+06	3.11064e+06	3.1777e+06	4.11743e+06	5.48409e+06	6.01738e+06	4.46874e+06	1.03605e+07	4.39539e+06	7.02357e+06	4.08155e+06	7.95424e+06
BisMePA(18:3e_18:1)	BisMePA	M+NH4	728.559	15.3387	C41 H79 O7 N1 P1	1.86091	4.63055e+06	1.39824e+06	8.68371e+06	2.50664e+06	0.53325	-0.90713	0.00740553	0.0183503	5.44938e+06	4.86186e+06	3.08173e+06	4.58629e+06	5.62442e+06	2.4627e+06	6.79277e+06	4.18527e+06	8.3556e+06	6.56683e+06	8.19519e+06	1.11975e+07	4.5595e+06	1.01814e+07	8.09215e+06	1.23216e+07
BisMePA(36:4e)	BisMePA	M+NH4	728.559	15.972	C41 H79 O7 N1 P1	0.0716112	30861.8	20354.2	47265	39850.4	0.65295	-0.61495	0.563524	0.634285	24773.5	35174.1	16611.3	31002.9	65228.1	3213.37	53525.8	17365.4	94577.8	11080.6	111592	20718.9	5416.79	65555.5	21963.5	47215.7
BisMePA(16:0_20:5)	BisMePA	M+NH4	740.522	13.085	C41 H75 O8 N1 P1	2.7748	1.77388e+07	1.54597e+06	1.07667e+07	1.02497e+06	1.6476	0.72033	0.000939106	0.00397777	1.85787e+07	1.94062e+07	1.65724e+07	1.83772e+07	1.96461e+07	1.5107e+07	1.73615e+07	1.68614e+07	9.47999e+06	1.0114e+07	9.90307e+06	1.23213e+07	1.03791e+07	1.18517e+07	1.0481e+07	1.16037e+07
BisMePA(16:2e_20:3)	BisMePA	M+NH4	726.543	14.822	C41 H77 O7 N1 P1	0.215452	92026.3	12028.5	47120.4	13455.6	1.953	0.9657	0.000939106	0.00397777	77105.8	91800.3	115187	87509.7	88830	79999	95689.8	100089	56998.4	63864.5	52042.9	45571	39618	58063.1	22408.7	38396.3
BisMePA(16:1_20:5)	BisMePA	M+NH4	738.507	11.7244	C41 H73 O8 N1 P1	0.313558	680728	173664	505478	169455	1.3467	0.42943	0.0831229	0.13017	599789	507769	1.03702e+06	777556	537598	615178	603286	767630	373803	725637	398402	748938	408997	393671	351397	642982
BisMePA(16:2e_20:4)	BisMePA	M+NH4	724.528	13.7699	C41 H75 O7 N1 P1	2.05038	1.19766e+07	1.33515e+06	7.96477e+06	706569	1.5037	0.58851	0.000939106	0.00397777	1.14032e+07	1.03929e+07	1.40532e+07	1.30141e+07	1.30526e+07	1.2366e+07	1.06986e+07	1.08318e+07	7.98329e+06	9.35661e+06	7.51727e+06	8.45772e+06	7.21845e+06	7.93746e+06	7.22154e+06	8.02584e+06
BisMePA(19:0_18:1)	BisMePA	M+Na	767.556	13.13	C42 H81 O8 N0 P1 Na1	1.94029	1.32056e+07	2.4892e+06	8.83287e+06	1.75521e+06	1.4951	0.58019	0.00538494	0.0143212	1.86513e+07	1.32526e+07	1.43989e+07	1.23771e+07	1.28423e+07	1.05023e+07	1.21782e+07	1.14422e+07	7.44901e+06	8.65747e+06	7.72705e+06	9.18181e+06	1.29501e+07	8.4823e+06	8.37991e+06	7.83532e+06
BisMePA(17:0_20:5)	BisMePA	M+NH4	754.538	13.7958	C42 H77 O8 N1 P1	0.668541	803079	101327	1.26006e+06	203437	0.63733	-0.64988	0.000939106	0.00397777	778619	739985	791328	931194	938761	638023	853786	752933	1.09686e+06	1.31771e+06	1.17693e+06	1.38617e+06	1.15426e+06	1.3337e+06	978927	1.63593e+06
BisMePA(17:1_20:5)	BisMePA	M+NH4	752.522	12.4485	C42 H75 O8 N1 P1	0.0272994	126921	19646.7	134949	73712.9	0.94051	-0.08848	0.563524	0.634285	143871	126943	134920	115524	131053	123098	87631.9	152327	94799	101817	69778.1	127426	128433	247235	61340.5	248760
BisMePA(18:3e_20:1)	BisMePA	M+NH4	756.59	16.359	C43 H83 O7 N1 P1	0.231866	212657	34740.6	279407	40330.7	0.7611	-0.39384	0.0100817	0.023429	278604	207312	214962	186648	213741	214870	156677	228442	291571	237811	283404	284395	277229	304392	211764	344693
BisMePA(20:2e_18:2)	BisMePA	M+NH4	756.59	16.621	C43 H83 O7 N1 P1	0.542402	1.09703e+06	285684	1.57976e+06	525942	0.69442	-0.52611	0.0520296	0.0879514	1.4596e+06	970473	819219	1.10114e+06	1.2315e+06	686636	1.48937e+06	1.01827e+06	1.37895e+06	1.28305e+06	1.48504e+06	2.60532e+06	997779	1.70832e+06	1.14723e+06	2.03239e+06
BisMePA(16:0_22:5)	BisMePA	M+NH4	768.554	13.1433	C43 H79 O8 N1 P1	1.10732	3.80391e+06	393194	2.59684e+06	344549	1.4648	0.55073	0.000939106	0.00397777	3.76318e+06	4.09307e+06	4.49006e+06	3.7729e+06	3.99549e+06	3.19964e+06	3.59621e+06	3.52072e+06	2.35322e+06	2.83128e+06	2.3271e+06	3.07546e+06	2.20488e+06	3.02053e+06	2.3154e+06	2.64685e+06
BisMePA(18:0_20:5)	BisMePA	M+NH4	768.554	14.475	C43 H79 O8 N1 P1	5.86453	1.38894e+08	1.26159e+07	1.04963e+08	7.78419e+06	1.3233	0.4041	0.000939106	0.00397777	1.47418e+08	1.46166e+08	1.21654e+08	1.45191e+08	1.54155e+08	1.18432e+08	1.3927e+08	1.38865e+08	1.07059e+08	9.99432e+07	9.25382e+07	1.14273e+08	9.9927e+07	1.15159e+08	1.01953e+08	1.08853e+08
BisMePA(24:1_14:4)	BisMePA	M+NH4	768.554	17.896	C43 H79 O8 N1 P1	0.060639	42358.5	23889.5	28980.3	34387.4	1.4616	0.54758	0.127808	0.186204	31754.2	43947.5	49971.3	34657.9	21921.2	31625.7	97272.1	27718.2	6278.44	107607	6962.2	33665.4	9512.67	12758.9	12919.7	42138.7
BisMePA(38:5)	BisMePA	M+NH4	768.554	19.332	C43 H79 O8 N1 P1	0.310924	257130	322816	59650.6	30938.2	4.3106	2.1079	0.0405689	0.0719971	91191.7	79589	128921	134790	57011.1	44917.7	914498	606126	41569.9	56069.4	43165.7	107424	50065	94760.4	11546.1	72603.9
BisMePA(18:2e_20:3)	BisMePA	M+NH4	754.575	15.6808	C43 H81 O7 N1 P1	0.844253	1.41507e+06	149059	772328	69462.6	1.8322	0.87359	0.000939106	0.00397777	1.40547e+06	1.22819e+06	1.39105e+06	1.64816e+06	1.52454e+06	1.27244e+06	1.55395e+06	1.29679e+06	909522	730295	768762	788223	784187	796020	669276	732335
BisMePA(18:1_20:5)	BisMePA	M+NH4	766.538	13.1469	C43 H77 O8 N1 P1	3.94614	3.71996e+07	3.33344e+06	2.29805e+07	2.32064e+06	1.6187	0.69488	0.000939106	0.00397777	3.61943e+07	3.74507e+07	4.34643e+07	3.73845e+07	3.91615e+07	3.16176e+07	3.65269e+07	3.57966e+07	2.09328e+07	2.47116e+07	2.06078e+07	2.65315e+07	2.06469e+07	2.54222e+07	2.20535e+07	2.29377e+07
BisMePA(16:0_22:6)	BisMePA	M+NH4	766.538	13.5874	C43 H77 O8 N1 P1	3.43759	1.7715e+07	2.94852e+06	6.89439e+06	1.13545e+06	2.5695	1.3615	0.000939106	0.00397777	1.79955e+07	1.84886e+07	1.30605e+07	1.73438e+07	2.05378e+07	1.55538e+07	2.25527e+07	1.6187e+07	8.02537e+06	5.08351e+06	5.30281e+06	7.35872e+06	7.32945e+06	7.7441e+06	7.73427e+06	6.57688e+06
BisMePA(16:2e_22:4)	BisMePA	M+NH4	752.559	14.7253	C43 H79 O7 N1 P1	2.49073	9.27422e+06	479572	3.89529e+06	521840	2.3809	1.2515	0.000939106	0.00397777	9.45373e+06	8.70827e+06	9.23329e+06	8.66863e+06	9.40135e+06	9.39969e+06	1.019e+07	9.13875e+06	4.08041e+06	4.03418e+06	3.12505e+06	4.29399e+06	4.34605e+06	3.95055e+06	4.29417e+06	3.03792e+06
BisMePA(18:2e_20:4)	BisMePA	M+NH4	752.559	15.0971	C43 H79 O7 N1 P1	3.57572	3.41371e+07	2.6903e+06	2.24772e+07	1.90435e+06	1.5187	0.60288	0.000939106	0.00397777	3.76271e+07	3.41503e+07	3.18874e+07	3.68168e+07	3.42313e+07	2.9906e+07	3.62771e+07	3.22004e+07	2.34322e+07	2.11541e+07	2.38272e+07	2.32009e+07	2.12934e+07	2.30314e+07	1.89318e+07	2.49467e+07
BisMePA(38:6e)	BisMePA	M+NH4	752.559	15.933	C43 H79 O7 N1 P1	0.255599	146113	43464.8	73354.7	15109.7	1.9919	0.99413	0.0135873	0.0294907	51001.9	180277	183568	160780	147505	178259	138878	128638	81988	71496.8	100688	52473.6	57426.5	69650.1	71604.9	81509.5
BisMePA(20:5_18:2)	BisMePA	M+NH4	764.522	11.9904	C43 H75 O8 N1 P1	2.74138	2.3368e+07	3.25156e+06	1.57836e+07	1.56273e+06	1.4805	0.5661	0.00194753	0.00637467	2.56295e+07	2.21924e+07	2.417e+07	2.26896e+07	2.80303e+07	1.67102e+07	2.38952e+07	2.36265e+07	1.47754e+07	1.65532e+07	1.86058e+07	1.74509e+07	1.50506e+07	1.43827e+07	1.47445e+07	1.47059e+07
BisMePA(18:3e_20:4)	BisMePA	M+NH4	750.543	13.7923	C43 H77 O7 N1 P1	2.59484	1.84375e+07	2.20279e+06	1.20705e+07	611421	1.5275	0.61116	0.000939106	0.00397777	1.74533e+07	1.71368e+07	2.10091e+07	1.99693e+07	2.10765e+07	1.51121e+07	1.92285e+07	1.65147e+07	1.22738e+07	1.20935e+07	1.2072e+07	1.22702e+07	1.23833e+07	1.30033e+07	1.09445e+07	1.15235e+07
BisMePA(16:2e_22:5)	BisMePA	M+NH4	750.543	14.2633	C43 H77 O7 N1 P1	2.90925	1.35459e+07	1.84713e+06	5.88343e+06	852613	2.3024	1.2031	0.000939106	0.00397777	1.36886e+07	1.36891e+07	1.24471e+07	1.36144e+07	1.61981e+07	1.19253e+07	1.59447e+07	1.08597e+07	6.54789e+06	5.33783e+06	5.54788e+06	5.12232e+06	6.77564e+06	5.65145e+06	7.21638e+06	4.86806e+06
BisMePA(18:3_20:5)	BisMePA	M+NH4	762.507	10.9723	C43 H73 O8 N1 P1	0.203077	72533	36641.7	137796	67657.4	0.52638	-0.92582	0.0405689	0.0719971	92333.4	60767.3	52316.6	154019	67094.5	37229.6	50026.1	66477.6	78585.8	221451	188027	203583	44081.8	117266	73991	175381
BisMePA(38:8)	BisMePA	M+NH4	762.507	11.305	C43 H73 O8 N1 P1	1.19689	2.01472e+06	277629	3.42813e+06	551809	0.5877	-0.76684	0.000939106	0.00397777	1.58074e+06	2.2163e+06	2.23063e+06	1.81618e+06	2.17757e+06	1.69285e+06	2.09114e+06	2.31233e+06	4.23463e+06	3.05015e+06	2.67623e+06	4.11408e+06	3.21337e+06	3.11589e+06	3.24099e+06	3.77974e+06
BisMePA(38:8e)	BisMePA	M+NH4	748.528	13.2796	C43 H75 O7 N1 P1	4.98393	8.21661e+07	5.45963e+06	1.06289e+08	8.21719e+06	0.77304	-0.37138	0.000939106	0.00397777	8.6773e+07	8.19725e+07	8.26268e+07	7.97081e+07	8.19835e+07	7.35306e+07	9.19261e+07	7.88081e+07	1.06386e+08	1.00505e+08	9.77696e+07	9.97787e+07	1.03104e+08	1.05926e+08	1.15302e+08	1.21544e+08
BisMePA(16:2e_22:6)	BisMePA	M+NH4	748.528	13.875	C43 H75 O7 N1 P1	0.339018	614809	232056	855364	334096	0.71877	-0.4764	0.103562	0.156612	397233	378998	945368	516065	910762	559749	784283	426012	1.0888e+06	1.10627e+06	1.16872e+06	150627	870536	904895	940762	612308
BisMePA(19:0_20:5)	BisMePA	M+NH4	782.569	12.733	C44 H81 O8 N1 P1	5.04264	3.04065e+08	3.25945e+07	2.68138e+08	1.47675e+07	1.134	0.1814	0.0239487	0.0468347	3.01768e+08	3.20978e+08	2.52803e+08	3.11973e+08	3.60916e+08	2.71989e+08	3.15702e+08	2.96392e+08	2.75282e+08	2.483e+08	2.7471e+08	2.89382e+08	2.74675e+08	2.66626e+08	2.71093e+08	2.45035e+08
BisMePA(17:1_22:6)	BisMePA	M+NH4	778.538	13.122	C44 H77 O8 N1 P1	0.976821	341363	58047.4	1.19113e+06	180431	0.28659	-1.803	0.000939106	0.00397777	386519	390811	247132	321047	367635	307393	416761	293603	1.20516e+06	865829	1.19854e+06	1.13922e+06	1.11549e+06	1.15771e+06	1.46963e+06	1.37745e+06
BisMePA(18:0_22:6)	BisMePA	M+NH4	794.569	14.934	C45 H81 O8 N1 P1	5.94815	9.5296e+07	2.20146e+07	5.67241e+07	7.08035e+06	1.68	0.74845	0.0027616	0.00834568	1.07291e+08	1.02672e+08	5.75654e+07	8.96162e+07	1.22739e+08	7.40203e+07	1.17886e+08	9.05778e+07	6.3549e+07	4.06897e+07	5.73416e+07	5.70456e+07	5.64727e+07	6.07201e+07	6.21873e+07	5.5787e+07
BisMePA(18:2e_22:4)	BisMePA	M+NH4	780.59	15.9796	C45 H83 O7 N1 P1	3.01077	1.2256e+07	2.01143e+06	4.08694e+06	518175	2.9988	1.5844	0.000939106	0.00397777	1.33998e+07	1.41417e+07	1.02635e+07	1.37617e+07	1.35513e+07	8.69462e+06	1.33051e+07	1.09302e+07	3.95205e+06	3.55027e+06	3.61222e+06	4.64609e+06	3.9016e+06	4.86202e+06	3.6383e+06	4.53297e+06
BisMePA(20:2e_20:4)	BisMePA	M+NH4	780.59	16.341	C45 H83 O7 N1 P1	1.73916	7.4214e+06	920931	4.48573e+06	765290	1.6544	0.72635	0.000939106	0.00397777	8.63598e+06	8.01974e+06	6.23423e+06	8.14142e+06	6.87626e+06	6.2576e+06	7.12432e+06	8.08165e+06	4.41607e+06	4.00515e+06	4.53841e+06	5.64148e+06	3.87513e+06	4.71325e+06	3.33256e+06	5.36376e+06
BisMePA(40:6e)	BisMePA	M+NH4	780.59	16.625	C45 H83 O7 N1 P1	0.942477	1.90854e+06	386284	979397	311912	1.9487	0.96251	0.00194753	0.00637467	2.54918e+06	1.98284e+06	1.28333e+06	1.80649e+06	1.75175e+06	1.75324e+06	1.81981e+06	2.32169e+06	753377	821219	790645	1.30865e+06	706015	1.53613e+06	765392	1.15375e+06
BisMePA(18:1_22:6)	BisMePA	M+NH4	792.554	11.155	C45 H79 O8 N1 P1	0.774551	195372	63911	749051	158883	0.26083	-1.9388	0.000939106	0.00397777	285002	222135	109060	132253	212727	169726	273464	158611	716342	635711	919704	791259	687654	468226	811486	962022
BisMePA(22:5_18:2)	BisMePA	M+NH4	792.554	14.8134	C45 H79 O8 N1 P1	0.378555	1.58327e+06	1.43185e+06	1.07604e+06	572060	1.4714	0.55717	0.372029	0.452003	1.23265e+06	1.02686e+06	1.56423e+06	1.05964e+06	5.04722e+06	482151	1.21581e+06	1.03756e+06	700135	705637	742220	2.23811e+06	775060	1.13098e+06	1.62892e+06	687266
BisMePA(18:3e_22:4)	BisMePA	M+NH4	778.575	14.8495	C45 H81 O7 N1 P1	1.36447	5.49367e+06	1.03023e+06	3.48854e+06	541897	1.5748	0.65515	0.000939106	0.00397777	6.48413e+06	5.60637e+06	4.454e+06	6.01213e+06	5.26743e+06	4.46794e+06	7.19952e+06	4.45785e+06	3.52648e+06	3.25337e+06	3.55418e+06	2.70512e+06	2.87806e+06	3.7326e+06	3.87675e+06	4.38174e+06
BisMePA(18:2e_22:5)	BisMePA	M+NH4	778.575	15.5761	C45 H81 O7 N1 P1	2.7073	1.1389e+07	2.18483e+06	4.54472e+06	670976	2.506	1.3254	0.000939106	0.00397777	1.30579e+07	1.00701e+07	8.8105e+06	1.2158e+07	1.32931e+07	9.38307e+06	1.46976e+07	9.64155e+06	5.6966e+06	3.37011e+06	4.94082e+06	4.24415e+06	4.46415e+06	4.64495e+06	4.7959e+06	4.20112e+06
BisMePA(18:3e_22:5)	BisMePA	M+NH4	776.559	14.3059	C45 H79 O7 N1 P1	1.57836	4.58255e+06	637428	2.21045e+06	611530	2.0731	1.0518	0.000939106	0.00397777	4.56669e+06	4.53015e+06	3.82941e+06	4.64827e+06	5.31335e+06	4.14939e+06	5.66101e+06	3.96216e+06	2.56346e+06	1.719e+06	2.16402e+06	1.35294e+06	3.0409e+06	2.148e+06	2.97333e+06	1.72194e+06
BisMePA(40:8e)	BisMePA	M+NH4	776.559	19.339	C45 H79 O7 N1 P1	0.154031	153398	108663	213941	69218.2	0.71701	-0.47993	0.270149	0.348585	301237	33118.4	51167.1	207994	124155	173238	293066	43208.1	195534	227990	179402	368300	166745	201087	141211	231258
BisMePA(18:2e_22:6)	BisMePA	M+NH4	776.559	21.2232	C45 H79 O7 N1 P1	0.0511886	89880.7	36177.4	101510	26467	0.88543	-0.17554	0.494837	0.568203	118684	78959.8	23479	102296	121997	63088.3	131977	78564.7	118841	59331.7	107265	123610	82340.3	91911.2	86904.2	141880
BisMePA(40:9e)	BisMePA	M+NH4	774.543	13.3587	C45 H77 O7 N1 P1	3.75353	4.54477e+07	5.05602e+06	5.95506e+07	4.10668e+06	0.76318	-0.38991	0.000939106	0.00397777	4.933e+07	4.3128e+07	3.94509e+07	4.27659e+07	4.981e+07	3.87689e+07	5.20631e+07	4.82649e+07	6.55011e+07	5.7981e+07	5.60639e+07	5.29922e+07	6.39937e+07	6.12404e+07	6.03903e+07	5.82426e+07
BisMePA(18:3e_22:6)	BisMePA	M+NH4	774.543	13.8181	C45 H77 O7 N1 P1	0.209562	1.22695e+06	279307	1.0743e+06	359399	1.1421	0.19168	0.372029	0.452003	1.46004e+06	1.16889e+06	712629	1.45491e+06	1.30273e+06	1.00293e+06	1.55957e+06	1.15392e+06	1.33666e+06	947694	1.33553e+06	965303	1.04546e+06	467576	1.64169e+06	854502
BisMePA(20:5_22:5)	BisMePA	M+NH4	814.538	12.3581	C47 H77 O8 N1 P1	0.205279	93593.2	31605.3	44591.4	13115	2.0989	1.0696	0.00538494	0.0143212	97903.6	93618.7	89778.2	101668	157016	41990.2	83730	83040.9	52495.6	29463.3	46334.1	25715	42353.3	54206.5	65565.7	40598
BisMePA(42:11)	BisMePA	M+NH4	812.522	11.2235	C47 H75 O8 N1 P1	0.720779	2.54414e+06	574017	1.85326e+06	242609	1.3728	0.45711	0.018129	0.0375566	2.87638e+06	2.28796e+06	2.20458e+06	3.06888e+06	3.19453e+06	1.87719e+06	3.07066e+06	1.77295e+06	1.92148e+06	1.47326e+06	1.95694e+06	1.70869e+06	1.63811e+06	1.81553e+06	2.1668e+06	2.1453e+06
BisMePA(42:8e)	BisMePA	M+NH4	804.59	15.9131	C47 H83 O7 N1 P1	2.05792	1.33808e+07	2.89446e+06	1.881e+07	3.56647e+06	0.71137	-0.49134	0.0135873	0.0294907	1.4982e+07	1.42992e+07	7.86838e+06	1.50713e+07	1.44014e+07	1.02475e+07	1.67166e+07	1.34596e+07	1.77664e+07	1.63166e+07	2.1303e+07	2.1488e+07	1.28922e+07	2.02947e+07	1.65213e+07	2.38975e+07
BisMePA(42:9)	BisMePA	M+NH4	816.554	11.4786	C47 H79 O8 N1 P1	0.467259	82111	17637.4	276294	38768	0.29719	-1.7506	0.000939106	0.00397777	76837.7	82735	65568.5	80467.5	102607	58499.1	111799	78373.7	295202	250213	313990	318274	231893	221035	268590	311156
BisMePA(20:4e_22:5)	BisMePA	M+NH4	802.575	14.5894	C47 H81 O7 N1 P1	1.27174	1.0258e+06	131126	2.55623e+06	535746	0.40129	-1.3173	0.000939106	0.00397777	1.12705e+06	869762	799881	1.09457e+06	1.01391e+06	1.03698e+06	1.19176e+06	1.0725e+06	2.67182e+06	1.93581e+06	3.33231e+06	3.04039e+06	1.81181e+06	2.55252e+06	2.22096e+06	2.88424e+06
BisMePA(22:5_22:6)	BisMePA	M+NH4	840.554	12.243	C49 H79 O8 N1 P1	0.302321	131152	59736.6	30893.2	12675.5	4.2453	2.0859	0.000939106	0.00397777	140539	70273.4	150999	223885	66777	104931	204746	87062.3	36350.5	14920.5	32554.3	28347.2	15634.8	53332.1	39533.6	26472.4
BisMePA(22:6_22:6)	BisMePA	M+NH4	838.538	11.7764	C49 H77 O8 N1 P1	0.134441	310733	79868	264373	58879.9	1.1754	0.2331	0.189263	0.257782	310862	288766	285736	409434	280244	264932	446389	199498	293561	157911	272157	263358	265969	219764	363466	278800
BisMePA(24:0_20:5)	BisMePA	M+NH4	852.648	17.8616	C49 H91 O8 N1 P1	0.372732	99122.9	19572.4	236090	56371.2	0.41985	-1.252	0.000939106	0.00397777	137828	103280	99943.8	88879.2	102917	85759.3	104258	70118.4	285521	178894	246476	204069	215984	216010	192885	348881
BisMePA(30:0_16:0)	BisMePA	M+Na	895.713	20.5816	C51 H101 O8 N0 P1 Na1	0.118218	172364	164654	225920	65114.9	0.76294	-0.39035	0.227147	0.301073	91037.3	386125	23781.9	101766	209851	49485.5	457291	59574.5	229250	101390	305257	300671	198020	228767	194970	249036
BisMePA(28:0_18:1)	BisMePA	M+Na	893.697	20.21	C51 H99 O8 N0 P1 Na1	0.0263163	202646	127011	192331	47843.1	1.0536	0.075365	0.958122	0.972038	227512	414884	66452.6	325320	100300	70342.7	261190	155163	204573	154942	280348	224059	135598	180317	147593	211220
BisMePA(28:1_18:1)	BisMePA	M+Na	891.681	19.7945	C51 H97 O8 N0 P1 Na1	0.129326	154274	115733	99482.1	100625	1.5508	0.63299	0.430897	0.508992	68065.2	159951	342514	185217	9338.06	286209	49051.5	133847	52303.1	343628	87113.8	67354.7	71577.2	66943.9	23576.3	83359.8
BisMePA(32:0_16:0)	BisMePA	M+Na	923.744	20.938	C53 H105 O8 N0 P1 Na1	0.151088	157468	84798.3	209694	49320.9	0.75094	-0.41323	0.227147	0.301073	156127	202639	34893	163703	218501	48832.4	289944	145102	271942	238176	199402	147211	281641	172703	169321	197158
BisMePA(30:0_18:1)	BisMePA	M+Na	921.728	20.6699	C53 H103 O8 N0 P1 Na1	0.25969	221616	117903	328957	48749.2	0.67369	-0.56983	0.0520296	0.0879514	280801	327194	55471.4	261800	269832	114801	372066	90964.6	394929	294866	357720	255183	386024	327443	289141	326346
BisMePA(30:0_18:3)	BisMePA	M+Na	917.697	19.814	C53 H99 O8 N0 P1 Na1	0.217706	153792	86156	246268	114841	0.62449	-0.67925	0.156254	0.220027	144247	151769	268591	171205	16361.5	251430	55513.4	171218	138792	490300	251764	211429	251636	223580	113606	289037
BisMePA(30:0_18:4)	BisMePA	M+Na	915.681	19.4115	C53 H97 O8 N0 P1 Na1	0.0308691	28140.1	46372.9	20019.7	39528.6	1.4056	0.49121	0.957811	0.972038	7028.43	6518.95	128300	3327.33	4.07469e-06	68507.5	4.07469e-06	11438.8	4938.37	116931	10856.9	16111.3	7273.9	4.07469e-06	4.07469e-06	4046.26
BisMePA(32:1_18:1)	BisMePA	M+Na	947.744	20.695	C55 H105 O8 N0 P1 Na1	0.00846115	144370	73822.3	141635	55626.9	1.0193	0.027591	0.958122	0.972038	282985	184803	53071.3	185020	134449	65584.5	114084	134963	147015	75254.4	135001	59630	225857	179412	127582	183329
BisMePE(16:0e)	BisMePE	M+H	482.324	3.47991	C23 H49 O7 N1 P1	0.00546568	61318.2	75406.6	62922.2	11084.3	0.97451	-0.037256	0.0135873	0.0294907	37494.8	35814.6	26508.3	247000	42849.1	38144.6	41937.2	20796.9	46701.1	62963.2	62221.5	82175.9	53605.8	72296.5	56803.6	66610.3
BisMePE(18:0e)	BisMePE	M+H	510.355	5.26087	C25 H53 O7 N1 P1	0.0105067	195184	66746.4	198593	64972	0.98283	-0.024982	1	1	156334	223188	135877	221651	306525	183201	240095	94601.9	158168	126831	196536	334896	192539	144843	233968	200965
BisMePE(18:2e)	BisMePE	M+H	506.324	2.474	C25 H49 O7 N1 P1	0.205298	2882.41	1982.78	42410.6	13401.2	0.067964	-3.8791	0.000939106	0.00397777	1600.73	4.07469e-06	2699.55	3180.53	3712.82	5552.78	5333.12	979.738	38093.6	28844.2	55796.7	35853.6	21435.6	52136.9	48611.6	58512.9
BisMePE(16:0_20:4)	BisMePE	M+H	768.554	13.1496	C43 H79 O8 N1 P1	1.07784	3.76706e+06	462971	2.59239e+06	319461	1.4531	0.53915	0.0027616	0.00834568	3.73589e+06	4.10462e+06	4.42865e+06	3.76188e+06	3.86012e+06	2.8004e+06	3.7042e+06	3.74071e+06	2.40264e+06	2.84066e+06	2.33694e+06	2.91575e+06	2.21052e+06	3.05043e+06	2.30298e+06	2.67923e+06
CL(72:0)	CL	M+H	1466.1	15.7331	C81 H159 O17 P2	0.200388	88175.1	12316.9	50041.6	6666.57	1.762	0.81724	0.000939106	0.00397777	80929.4	71062.4	83383.1	98953	91578.6	84242.1	83991.7	111260	47923.2	53859.5	45584.7	38908	52452.5	61870.9	50965.2	48769
CL(72:6)	CL	M+H	1454.01	20.25	C81 H147 O17 P2	0.277368	342295	218348	186001	131637	1.8403	0.87993	0.0831229	0.13017	29220	464577	278177	687281	107827	339882	541951	289443	88248.8	238992	244668	42870.8	241084	87117.3	103359	441664
CL(72:8)	CL	M+Na	1471.96	18.9017	C81 H142 O17 P2 Na1	0.190705	107810	30728.1	160030	43598.2	0.67369	-0.56985	0.0313241	0.0589837	123666	112172	57042.1	154935	121021	71172	110696	111775	135500	113568	153462	93086.2	175242	205076	212432	191874
CL(73:5)	CL	M+H	1470.04	20.431	C82 H151 O17 P2	0.0949011	23669.4	20114.9	42280.1	23575.9	0.55982	-0.83695	0.169	0.237885	42071.2	27805.3	4.07469e-06	41781.1	40712.1	4.07469e-06	36985.6	4.07469e-06	71269.7	4.07469e-06	54336.2	29286.2	25516.6	53522.8	65310.1	38999
CL(74:1)	CL	M+H	1492.12	15.7691	C83 H161 O17 P2	0.515069	403112	65585.2	159086	33627.2	2.5339	1.3414	0.000939106	0.00397777	407900	360876	481626	432736	313716	452325	315808	459905	161741	192425	121439	131992	143376	223733	146193	151786
CL(74:5)	CL	M+H	1484.06	13.4326	C83 H153 O17 P2	0.166463	30038.1	14315.5	78821.8	64901.1	0.38109	-1.3918	0.227147	0.301073	31013.7	45423.2	51546.7	21625.2	14374	22415.3	13896.3	40010.7	31752.3	86626.6	35247.6	191392	13505.5	107304	20992.9	143754
CL(74:8)	CL	M+H	1478.01	19.9374	C83 H147 O17 P2	0.334974	437160	111033	286120	83723.8	1.5279	0.61154	0.0239487	0.0468347	507054	392589	303816	573171	573607	396332	462599	288113	321845	237635	249818	224239	206162	406618	413253	229395
CL(75:7)	CL	M+H	1494.04	12.059	C84 H151 O17 P2	0.283472	124082	33562.5	221683	66609.8	0.55973	-0.83721	0.00740553	0.0183503	138426	80955.7	75481.9	175929	137367	119847	147142	117506	164457	217541	232527	301714	121921	287311	164949	283045
CL(76:10)	CL	M+Na	1523.99	19.359	C85 H146 O17 P2 Na1	0.235099	355824	98435.5	257740	92421.2	1.3806	0.46525	0.0520296	0.0879514	289643	487671	212958	344327	432339	247972	436210	395474	280143	163017	193357	154580	377406	319541	375498	198379
CL(76:2)	CL	M+H	1518.14	15.7439	C85 H163 O17 P2	0.183074	108634	12072.8	75326.3	8855.59	1.4422	0.52825	0.00135938	0.00497765	117191	111344	91067.2	123641	101396	96083.3	122378	105970	72870	77766.1	69642.6	68889.1	78561.5	73223.4	66904.3	94753.2
CL(76:8)	CL	M+Na	1528.02	19.706	C85 H150 O17 P2 Na1	0.352023	229906	61341.1	96593.5	46807.9	2.3801	1.251	0.00194753	0.00637467	327124	294371	134567	254011	190846	212788	230872	194668	99455.3	29169	73497.4	49643	120138	168080	144640	88125.5
CL(77:7)	CL	M+H	1522.07	11.992	C86 H155 O17 P2	0.0561325	21375.5	5976.92	30736.7	22804.2	0.69544	-0.52401	0.958122	0.972038	26659.4	13326.2	23378.8	30153.3	20480.7	23584.5	20390.8	13030.4	21967.5	55041.2	10808.6	52263.9	7873.16	23461.7	10296.1	64181.7
CL(78:11)	CL	M+H	1528.03	12.6209	C87 H149 O17 P2	2.0548	7.25442e+06	1.09364e+06	1.14794e+07	1.61332e+06	0.63195	-0.66212	0.00194753	0.00637467	8.89953e+06	7.13525e+06	5.46586e+06	7.4951e+06	6.6172e+06	7.21192e+06	8.53824e+06	6.67229e+06	1.20459e+07	8.40951e+06	1.02188e+07	1.12167e+07	1.14753e+07	1.24711e+07	1.22199e+07	1.37783e+07
CL(78:7)	CL	M+H	1536.09	14.4778	C87 H157 O17 P2	2.99852	1.84511e+07	2.25981e+06	1.01823e+07	1.0561e+06	1.8121	0.85765	0.000939106	0.00397777	2.08783e+07	1.90028e+07	1.70534e+07	2.11606e+07	1.99674e+07	1.45558e+07	1.8187e+07	1.68035e+07	9.67417e+06	9.83763e+06	8.41707e+06	1.1074e+07	1.05838e+07	1.09552e+07	9.31607e+06	1.16002e+07
CL(79:12)	CL	M+H	1540.03	11.522	C88 H149 O17 P2	0.0370896	6751.93	3149.04	11014.3	10784.7	0.61301	-0.70601	0.874735	0.905144	1103.47	9206.55	3818.57	6366.13	7650.12	6987.25	11365.2	7518.15	483.576	19511.2	4.07469e-06	18204.2	5373.41	17196.2	4.07469e-06	27345.9
CL(80:12)	CL	M+H	1554.04	12.0072	C89 H151 O17 P2	0.367162	205522	58361	348726	54771.9	0.58935	-0.7628	0.00135938	0.00497765	295395	156292	167650	194870	258846	116303	223403	231415	319591	318418	369992	408171	263934	379668	307708	422326
CL(80:13)	CL	M+H	1552.03	11.959	C89 H149 O17 P2	0.10113	136681	27718.5	115389	22616.2	1.1845	0.2443	0.127808	0.186204	152985	161512	90436.4	156832	119802	104468	148755	158654	106253	93361.9	104876	153888	115060	116841	89819.1	143013
CL(80:4)	CL	M+Na	1592.15	15.363	C89 H166 O17 P2 Na1	0.552017	315003	75645.9	37846.4	12373.5	8.3232	3.0571	0.000939106	0.00397777	374975	359315	200338	374403	364751	216282	367891	262072	56536.4	20379.5	35860.9	48910.1	39561.8	39281.3	41007.2	21233.9
CL(84:10)	CL	M+H	1614.14	11.6527	C93 H163 O17 P2	0.135982	2.10979e+06	453939	2.23293e+06	558586	0.94485	-0.081841	0.792896	0.837939	2.62397e+06	1.95515e+06	1.93967e+06	2.28056e+06	2.21726e+06	1.17684e+06	2.57248e+06	2.11236e+06	2.07036e+06	2.0643e+06	2.50092e+06	3.40023e+06	1.66351e+06	1.78096e+06	1.90617e+06	2.47701e+06
CL(84:14)	CL	M+H	1606.07	11.405	C93 H155 O17 P2	0.0332469	32791.8	12557.2	27704.4	16028.8	1.1836	0.24322	0.563524	0.634285	30392.4	46641.6	7917.23	32241.8	34338.2	26026.6	37152.7	47623.8	5158.85	32544.4	45094.7	14601	34625.1	16102.7	51692.8	21815.6
CL(84:9)	CL	M+H	1616.15	12.2985	C93 H165 O17 P2	0.893027	2.56275e+06	325013	3.37844e+06	243543	0.75856	-0.39866	0.00194753	0.00637467	2.56551e+06	2.83214e+06	2.03831e+06	2.52673e+06	2.85946e+06	2.34773e+06	3.00877e+06	2.32335e+06	3.49992e+06	2.83672e+06	3.33666e+06	3.4591e+06	3.27372e+06	3.60388e+06	3.54733e+06	3.47015e+06
CL(86:10)	CL	M+H	1642.17	12.376	C95 H167 O17 P2	0.373838	499831	80163.2	688548	155192	0.72592	-0.46212	0.0100817	0.023429	504583	513133	366371	536126	608643	426008	582684	461100	996874	536001	670215	560086	779412	689012	738722	538067
CL(86:13)	CL	M+H	1636.12	12.19	C95 H161 O17 P2	0.111525	65376.3	23812.7	87489.3	19080.7	0.74725	-0.42034	0.0239487	0.0468347	71721.7	114119	75832.3	36767.3	68729.2	52645.2	45580.1	57615.9	63015.5	78672	88668.9	80560.7	114794	75617.7	81164.4	117422
CL(86:14)	CL	M+H	1634.1	11.6713	C95 H159 O17 P2	0.21593	187770	15266.7	140928	15736.1	1.3324	0.41401	0.00135938	0.00497765	189355	174783	183788	210533	189153	162681	204926	186944	141467	162162	147809	127127	130825	128210	164261	125561
CL(86:15)	CL	M+H	1632.09	11.4052	C95 H157 O17 P2	0.0972202	61944.6	19387.9	45063.1	13163.8	1.3746	0.45903	0.0831229	0.13017	46623.1	93223.8	31977	63335.5	80833.6	50975	68163.6	60425.1	57463.5	26884	33225.6	63337.6	38676.7	37302	57405.4	46209.6
CL(86:16)	CL	M+H	1630.07	11.0726	C95 H155 O17 P2	0.276065	36046.3	20945.7	116361	38547.2	0.30978	-1.6907	0.000939106	0.00397777	17582.2	22432.6	20440.9	48912.9	50780.8	22343.1	77023.2	28854.5	128635	79336.9	93585.7	97996.8	149817	100075	192934	88507
CL(86:17)	CL	M+H	1628.06	11.468	C95 H153 O17 P2	0.0381276	7772.13	6060.75	4145.03	4460.25	1.875	0.90693	0.150121	0.218197	4.07469e-06	8204.52	9015.74	4.07469e-06	12870.7	6707.08	18125.2	7253.87	4237.01	4.07469e-06	6037.4	13268.6	4.07469e-06	4.07469e-06	4769.49	4847.76
CL(88:13)	CL	M+Na	1686.13	12.4123	C97 H164 O17 P2 Na1	0.0454384	20955.7	4520.24	26401	11142.7	0.79375	-0.33325	0.127808	0.186204	29348.8	16429	15160.7	24829.9	19162.6	21335.6	20708.1	20671.2	34920.5	27719.6	26813	3487.15	36317.4	37744.7	20425.5	23780.6
CL(88:14)	CL	M+H	1662.14	12.2474	C97 H163 O17 P2	0.0157879	27012.7	5463.15	25130.7	11237.8	1.0749	0.10419	0.958122	0.972038	28395.9	31217.4	26337.8	23893.8	35835.2	21553.9	29828.6	19038.9	23607.5	7164.03	32855.4	33257.2	40357.3	15446.2	31449.6	16907.9
CL(88:15)	CL	M+H	1660.12	11.2363	C97 H161 O17 P2	4.06432	9.05887e+06	2.01691e+06	2.43218e+07	4.31055e+06	0.37246	-1.4248	0.000939106	0.00397777	9.02069e+06	9.06368e+06	5.8934e+06	1.05639e+07	1.09367e+07	7.02318e+06	1.18292e+07	8.14025e+06	2.25795e+07	1.76486e+07	2.77348e+07	3.10664e+07	2.1174e+07	2.23829e+07	2.42477e+07	2.77404e+07
CL(88:16)	CL	M+H	1658.1	11.413	C97 H159 O17 P2	0.108911	43949.2	23680.8	23991.2	9737.26	1.8319	0.87333	0.103562	0.156612	21049	57420.6	17259.9	32278.1	72765.4	23349	76644.4	50826.8	23275.3	11093.5	22195.1	14364.4	39409.4	17845.2	32643.3	31103.2
CL(88:17)	CL	M+H	1656.09	11.2976	C97 H157 O17 P2	0.0985121	47872.8	19197	30823.7	12961.9	1.5531	0.63517	0.0831229	0.13017	48690	69655.1	24536.1	33861.3	59249.4	22068.4	70907.5	54014.7	25523.6	17595.2	35234.5	37603	47455.3	12280.5	46501.3	24395.8
CL(89:18)	CL	M+H	1668.09	11.503	C98 H157 O17 P2	0.0548069	27306.2	11482	35337.3	13871.3	0.77273	-0.37196	0.270149	0.348585	35924.5	19397.7	24208.3	20105.2	31488.8	12783.7	49469.1	25072	63198	21759.9	38426.9	23144.3	35825.1	24689.4	44972.1	30682.4
CarE(12:0+O)	CarE	M+H	360.274	1.24537	C19 H38 O5 N1	0.168773	40357	17963.9	85763.9	51015.9	0.47056	-1.0876	0.0239487	0.0468347	72447.8	31457.6	33557.9	47562.8	30251.2	23481.4	23894.7	60202.1	48198.4	34418.2	100209	50176.7	176516	38449.6	118000	120143
CarE(14:0+O)	CarE	M+H	388.306	1.58363	C21 H42 O5 N1	0.262977	71376.4	37247.2	181635	125970	0.39297	-1.3475	0.0239487	0.0468347	134039	42970.5	75032.2	92620.6	41181.2	45696	31417.4	108054	127427	74145.5	172044	106937	466403	89973.4	204793	211361
CarE(14:1)	CarE	M+H	370.295	1.668	C21 H40 O4 N1	0.191217	99903.4	28453.8	165708	87753.4	0.60289	-0.73004	0.156254	0.220027	136270	70118.5	87060.1	134581	95751.5	59624.3	95216.5	120605	110471	102522	172187	75664.3	305231	77161.3	242250	240175
CarE(14:1+O)	CarE	M+H	386.29	1.37256	C21 H40 O5 N1	0.249094	50459.5	19347.2	131937	69264.4	0.38245	-1.3866	0.0100817	0.023429	72159.4	31861.5	57136.1	67079.3	48385.8	29117.4	26403.1	71533.7	79377.9	56546.6	146730	111688	264306	64647.5	173985	158212
CarE(16:0)	CarE	M+H	400.342	2.948	C23 H46 O4 N1	0.779974	1.22984e+06	307132	2.04035e+06	665986	0.60276	-0.73035	0.00740553	0.0183503	1.23587e+06	1.00056e+06	1.22409e+06	1.81212e+06	1.4697e+06	866532	1.27721e+06	952620	1.56101e+06	1.55573e+06	2.71263e+06	1.28002e+06	2.50852e+06	1.39695e+06	2.31941e+06	2.98854e+06
CarE(16:0+O)	CarE	M+H	416.337	2.2402	C23 H46 O5 N1	0.306992	222882	92794.5	389104	207166	0.57281	-0.80388	0.0660819	0.107911	343009	145540	215412	220921	172205	223965	94798.9	367205	298767	203160	374051	220032	835449	299921	350261	531191
CarE(16:1)	CarE	M+H	398.326	2.82451	C23 H44 O4 N1	0.318337	124150	37161.1	263452	127470	0.47124	-1.0855	0.0135873	0.0294907	176250	102764	108027	167168	99898.6	89083	89192.6	160817	199292	157471	356827	150463	511088	162110	238449	331914
CarE(16:1+O)	CarE	M+H	414.321	1.75671	C23 H44 O5 N1	0.319131	106586	42859.9	271686	196697	0.39231	-1.3499	0.0405689	0.0719971	173998	73712.6	106203	137614	92832.5	60167.4	59840.3	148321	146130	89287.8	303197	139409	678766	113933	352101	350664
CarE(18:0)	CarE	M+H	428.373	4.75608	C25 H50 O4 N1	0.0404243	921366	232267	948705	330869	0.97118	-0.042185	0.958122	0.972038	1.22761e+06	1.05289e+06	691928	1.07262e+06	1.08176e+06	524327	852344	867459	752995	602259	974014	798441	1.08102e+06	645414	1.11867e+06	1.61683e+06
CarE(18:0+O)	CarE	M+H	444.368	3.4157	C25 H50 O5 N1	0.107918	280464	108255	330090	147966	0.84966	-0.23504	0.494837	0.568203	439015	179448	310566	299574	273578	151006	176573	413953	151273	208029	444303	277954	226073	291340	468418	573329
CarE(18:1+O)	CarE	M+H	442.353	1.93822	C25 H48 O5 N1	0.0123345	19471	10990.5	21245.5	14591.1	0.91648	-0.12583	0.792896	0.837939	17984.3	8308.83	11165.8	40190.9	28649.7	23272.4	17598.1	8597.71	14452.2	5310.88	18305.2	9406.93	32098.1	11213.1	48251	30926.3
CarE(20:0)	CarE	M+H	456.405	6.86495	C27 H54 O4 N1	0.203562	1.32677e+06	772764	1.10687e+06	664659	1.1987	0.26143	0.874826	0.905144	2.08627e+06	1.40527e+06	547291	2.55089e+06	1.5228e+06	364956	1.51221e+06	624491	725640	275601	1.00947e+06	550096	1.57909e+06	757204	2.16645e+06	1.79142e+06
CarE(20:1)	CarE	M+H	454.389	4.9158	C27 H52 O4 N1	0.743562	2.3416e+06	1.38255e+06	3.78448e+06	2.82913e+06	0.61874	-0.6926	0.318425	0.399191	4.22748e+06	2.13312e+06	1.0121e+06	4.16735e+06	3.22824e+06	772538	1.99553e+06	1.19648e+06	2.22875e+06	670004	2.92623e+06	1.57386e+06	6.96423e+06	2.26886e+06	8.74859e+06	4.89531e+06
CarE(20:3)	CarE	M+H	450.358	2.81651	C27 H48 O4 N1	0.17163	44559.2	14198.1	79350.7	20718.1	0.56155	-0.83252	0.00387604	0.0109285	50340.2	38194.7	31401.3	59466.2	38846.4	21770	55378.3	61075.9	69313.1	62641.2	86678.7	69386.2	92117.2	47211.6	97124.8	110333
Cer(d31:0)	Cer	M+H	498.488	9.89469	C31 H64 O3 N1	0.0459376	15719.2	5347.34	19861.1	3655.75	0.79146	-0.33742	0.0831229	0.13017	10246.9	12422.1	18275.5	20235.4	16318	25404.6	10596	12255.3	24293.1	20072.1	14010.4	23071.2	20415.2	21677.3	14832	20517.9
Cer(d32:0)	Cer	M+H	512.504	10.7526	C32 H66 O3 N1	0.0691869	15519.5	4605.56	23103.3	7680.37	0.67174	-0.57402	0.0405689	0.0719971	11605.9	10623.9	18827.3	21289.3	17747.4	20417.3	9739.65	13905.6	19713.3	35905.8	10950.1	26420.2	20939.2	30428.3	18816.3	21653.5
Cer(d16:1_16:0)	Cer	M+H	510.488	12.5954	C32 H64 O3 N1	0.169286	30306.9	8143.42	3291.04	4963.14	9.2089	3.203	0.000785338	0.00397777	28161.1	27262.3	42089.6	29194.6	41610.9	28833.1	28269.2	17034.4	4.07469e-06	4.07469e-06	10700.8	4462.62	11164.8	4.07469e-06	4.07469e-06	4.07469e-06
Cer(d16:1_16:1)	Cer	M+H	508.472	11.991	C32 H62 O3 N1	0.0309279	21675.3	14892.3	17102.9	11850.5	1.2673	0.34181	0.370618	0.452003	10579.4	39258.7	33021.8	4441.19	30252.9	21886.2	33962.6	4.07469e-06	16451.2	4.07469e-06	32126.8	17274.6	22858.1	4.07469e-06	28640.4	19472.1
Cer(d33:0)	Cer	M+H	526.519	11.5745	C33 H68 O3 N1	0.0737142	199306	186410	236959	133252	0.8411	-0.24965	0.563524	0.634285	7951.45	44073.2	321951	288987	132378	558202	37625.3	203284	286136	243682	34592.7	325755	315613	403228	39342.6	247322
Cer(d18:1_16:1)	Cer	M+H	536.504	13.5147	C34 H66 O3 N1	0.0541088	93148.5	47356.8	106568	24842.8	0.87408	-0.19416	0.318425	0.399191	48011.8	95517.6	195609	95644.2	88743.8	98700	84885.4	38076.3	117407	142177	82076.9	137576	74463.4	88642.9	108012	102185
Cer(d18:2_16:1)	Cer	M+H	534.488	12.1022	C34 H64 O3 N1	0.0755611	36299.3	21411.6	23602.4	8592.86	1.5379	0.62101	0.270149	0.348585	20360.6	34817	79158.5	39945.8	20852.4	53108.3	28759.9	13391.9	23355.6	41774.7	22347	24442.7	20471.4	25975.7	19002.7	11449.6
Cer(d35:0)	Cer	M+H	554.551	13.2579	C35 H72 O3 N1	0.200256	40695.3	53230.7	110481	77035	0.36834	-1.4409	0.0946411	0.147645	4.07469e-06	4.07469e-06	96929.6	61892.2	4.07469e-06	137942	4.07469e-06	28798.2	124689	125303	4.07469e-06	128347	121829	230700	4.07469e-06	152984
Cer(d17:0_18:0)	Cer	M+H	554.551	15.1915	C35 H72 O3 N1	0.272964	230101	181260	385745	189981	0.59651	-0.74538	0.0831229	0.13017	27890.7	82724.9	337031	366460	169511	560901	74603.1	221689	444632	387380	108446	488185	437680	659505	104262	455868
Cer(d35:1)	Cer	M+H	552.535	11.7202	C35 H70 O3 N1	0.126427	49194.3	61020.6	14251.9	12200.6	3.4518	1.7873	0.187959	0.257782	2658.63	32360.2	30389	76086.4	54300.8	185930	11829.4	4.07469e-06	5949.66	34900.6	21135.6	4.07469e-06	17071.7	11808.7	23148.7	4.07469e-06
Cer(d35:2)	Cer	M+H	550.519	10.4049	C35 H68 O3 N1	0.0236892	44311.9	39858.8	49837.2	26678.6	0.88913	-0.16953	0.430897	0.508992	7065.22	25663.2	29635.2	63179.2	77203.7	120619	26906.1	4224.03	39368.8	80649.3	89740	10128.5	27451.1	51083.7	61349.5	38927.1
Cer(d18:0_18:1)	Cer	M+H	566.551	14.849	C36 H72 O3 N1	0.173902	44419.8	19639.1	10346.6	10254.5	4.2932	2.1021	0.00188822	0.00637467	60335.5	55333.6	62975.4	23528.8	31509.4	28782.4	70187.4	22705.7	6796.46	11848.2	4.07469e-06	19893.1	4.07469e-06	26107	18127.8	4.07469e-06
Cer(d18:1_18:0)	Cer	M+H	566.551	15.5014	C36 H72 O3 N1	1.58469	5.3064e+06	1.25299e+06	2.73635e+06	272016	1.9392	0.95548	0.0100817	0.023429	5.23914e+06	5.92412e+06	5.36068e+06	5.96032e+06	6.68368e+06	5.45321e+06	5.39539e+06	2.43466e+06	2.50589e+06	2.99964e+06	2.51715e+06	3.14623e+06	2.41504e+06	2.82027e+06	2.92915e+06	2.55745e+06
Cer(d18:2_18:0)	Cer	M+H	564.535	14.2223	C36 H70 O3 N1	0.537574	582866	141567	285030	55366.7	2.0449	1.0321	0.00135938	0.00497765	504367	689268	748403	559694	600035	729670	508377	323116	310105	395797	265676	321703	260657	226209	263069	237025
Cer(d18:0_19:0)	Cer	M+H	582.582	16.6192	C37 H76 O3 N1	0.282702	60657.2	56978.6	166442	75590.6	0.36444	-1.4563	0.0100817	0.023429	12489.9	6378.56	100593	124546	14856.5	147875	15149.3	63368.9	154211	170607	58057.1	264494	198957	257537	71534.9	156136
Cer(d37:1)	Cer	M+H	580.566	15.2605	C37 H74 O3 N1	0.0578184	36250.9	45807	22590.2	15353.1	1.6047	0.68232	0.916298	0.946995	3398.9	20974.2	15506.9	34363	63674.3	138126	13963.8	4.07469e-06	8140.91	40160	42384.8	4.07469e-06	19116.5	26462	32305.7	12151.8
Cer(d37:3)	Cer	M+H	576.535	10.8272	C37 H70 O3 N1	0.0186095	2737.94	4002.56	1395.52	2039.08	1.962	0.97229	0.574873	0.646666	4.07469e-06	875.949	1796.42	2713.82	4769.9	11747.5	4.07469e-06	4.07469e-06	4.07469e-06	3285.68	4.07469e-06	4.07469e-06	4.07469e-06	2744.66	5133.81	4.07469e-06
Cer(d37:4)	Cer	M+H	574.519	10.1216	C37 H68 O3 N1	0.110051	32567.6	29704.9	10823.2	6412.1	3.0091	1.5893	0.127808	0.186204	4665.86	18504.5	24282.7	43855.8	62172.6	87372.6	16608	3078.94	8842.71	17339.6	21209.9	2468.69	5827.55	9135.71	15119.1	6642.48
Cer(d18:2_20:0)	Cer	M+H	592.566	15.6011	C38 H74 O3 N1	0.996263	4.17587e+06	1.21017e+06	5.64226e+06	991339	0.74011	-0.4342	0.0239487	0.0468347	3.50032e+06	4.28331e+06	4.24085e+06	4.36637e+06	5.72767e+06	3.877e+06	5.55014e+06	1.86132e+06	5.44209e+06	5.5267e+06	5.57544e+06	5.75532e+06	5.55891e+06	5.0476e+06	7.84795e+06	4.38411e+06
Cer(d18:2_20:1)	Cer	M+H	590.551	15.952	C38 H72 O3 N1	0.133637	43644	16552.4	20634.4	10575.2	2.1151	1.0807	0.0100817	0.023429	26586.8	69797.3	51471.9	34205	47645.3	59344.4	39009	21092.5	11305.8	23844.3	8135.84	35636.3	20864.8	23272.7	33192.8	8822.44
Cer(d20:2_18:1+O)	Cer	M+NH4	623.572	10.732	C38 H75 O4 N2	0.0916853	27032.2	38657.1	58694.3	95244.3	0.46056	-1.1185	0.227147	0.301073	5362.83	7337.06	5924.54	80134.7	6132.19	5610.96	98188.3	7567.19	6832.42	6592.16	6346.73	6396.52	8368.3	10440	195306	229272
Cer(d38:4)	Cer	M+H	588.535	15.581	C38 H70 O3 N1	0.117142	191442	64779.7	155568	44239.6	1.2306	0.29936	0.189263	0.257782	152380	211522	166725	182996	239506	271600	240394	66414.3	145590	162774	103729	240627	175789	167529	147843	100662
Cer(d18:0_21:0)	Cer	M+H	610.613	17.6723	C39 H80 O3 N1	0.308686	55224.3	19352	149585	37098.3	0.36918	-1.4376	0.000939106	0.00397777	64815	47374.7	28983.3	66101	68473.9	41215.5	86764.7	38066.2	89165.8	169993	133277	213841	143502	174288	127022	145593
Cer(d39:5)	Cer	M+H	600.535	10.7611	C39 H70 O3 N1	0.0546306	4471.4	4484.78	144.499	93.7466	30.944	4.9516	0.0660819	0.107911	59.1804	1191.99	5457.56	5339.67	9049.61	12422.8	2189.28	61.0824	127.943	99.7437	119.747	219.521	4.07469e-06	322.872	128.433	137.731
Cer(d39:6)	Cer	M+H	598.519	9.68434	C39 H68 O3 N1	0.0282774	24290.1	24062.5	19393.7	10555.6	1.2525	0.32478	0.958122	0.972038	3527.43	14235.3	13002.7	29415.5	48559	70760.9	12348.3	2471.76	15413.7	25301.5	35206.3	3981.24	11434.6	22442.8	29785.1	11584
Cer(d18:0_22:1)	Cer	M+H	622.613	17.053	C40 H80 O3 N1	0.34905	451554	255392	692384	281282	0.65217	-0.61667	0.0831229	0.13017	638286	190586	601271	230793	591931	512831	782117	64616	886920	290302	385648	897041	921202	389829	906108	862020
Cer(d19:2_21:0)	Cer	M+H	620.598	18.2556	C40 H78 O3 N1	0.203478	93371.5	37268.4	145744	21930.1	0.64066	-0.64238	0.0239487	0.0468347	80980.2	146205	104231	90483.7	136196	50819	99207.4	38849.8	135031	126153	173204	132378	138876	132269	141232	186806
Cer(d20:2_20:0+O)	Cer	M+NH4	653.619	23.8794	C40 H81 O4 N2	0.0294577	8244.45	8278.63	5230.21	3483.28	1.5763	0.65656	0.792896	0.837939	26118.8	9202.24	1527.11	1860.44	11060.1	4095	10442	1649.92	5973.47	6885.06	6695.02	11636.8	1959.9	5436.76	691.159	2563.52
Cer(d18:2_22:2)	Cer	M+H	616.566	16.5394	C40 H74 O3 N1	0.314885	68556.4	22154.3	160604	19661.2	0.42687	-1.2281	0.000939106	0.00397777	89085.9	73883.6	56761.4	64506.9	77776.3	68613.8	94683.7	23139.7	161762	135484	155810	186638	186807	149923	169861	138548
Cer(d18:0_22:5)	Cer	M+H	614.551	15.784	C40 H72 O3 N1	0.232699	927053	426094	724600	493720	1.2794	0.35547	0.318425	0.399191	981898	1.21431e+06	307658	347054	1.37864e+06	1.23718e+06	1.25824e+06	691431	476559	587186	633970	684647	1.92623e+06	453532	597323	437354
Cer(d18:0_23:0)	Cer	M+H	638.645	18.5386	C41 H84 O3 N1	0.200577	89484.9	55423.4	153191	50788.9	0.58414	-0.77562	0.0520296	0.0879514	189114	117421	128511	53690.8	80329.6	91633.3	38567.6	16611.5	197847	105871	158649	160462	89494.8	182611	100011	230585
Cer(d18:0_23:0+O)	Cer	M+H	654.639	19.052	C41 H84 O4 N1	0.0999454	22351	9701.59	9454.16	5290.06	2.3641	1.2413	0.0100817	0.023429	30699.9	34867.1	15184.4	28723.4	12666.1	15868.8	30326	10472.4	6818.22	6769.99	7636.12	1894.64	15256.3	9402.29	9049.69	18806
Cer(d18:1_23:0)	Cer	M+H	636.629	18.1049	C41 H82 O3 N1	1.88959	5.3418e+06	1.56449e+06	8.99781e+06	943480	0.59368	-0.75225	0.000939106	0.00397777	6.42765e+06	6.64668e+06	4.943e+06	5.21419e+06	6.54017e+06	3.95335e+06	6.66231e+06	2.34703e+06	9.02827e+06	8.09073e+06	1.00296e+07	8.6746e+06	9.88194e+06	7.4123e+06	8.90109e+06	9.96399e+06
Cer(d18:1_23:0+O)	Cer	M+H	652.624	17.2342	C41 H82 O4 N1	0.365901	224943	71548.7	366571	31606.4	0.61364	-0.70453	0.0027616	0.00834568	219707	230254	178506	233544	354042	186679	282099	114711	373536	336273	422267	381670	346178	360807	387702	324137
Cer(d18:1_23:3)	Cer	M+H	630.582	17.1414	C41 H76 O3 N1	0.633406	242048	85834.6	605423	44875.5	0.3998	-1.3227	0.000939106	0.00397777	307103	236352	166510	287255	288836	198564	358085	93676.3	559956	548650	661285	626690	599526	566605	665376	615297
Cer(d18:0_24:1)	Cer	M+H	650.645	18.0354	C42 H84 O3 N1	0.278996	849888	253182	1.01716e+06	145322	0.83555	-0.25921	0.270149	0.348585	671954	1.21818e+06	1.10203e+06	962386	998213	574584	724720	547036	878187	1.12972e+06	956173	1.30353e+06	900921	1.00909e+06	896906	1.06278e+06
Cer(d18:1_24:0+O)	Cer	M+H	666.639	17.1534	C42 H84 O4 N1	0.445566	1.25296e+06	292050	960564	105385	1.3044	0.38339	0.018129	0.0375566	1.11922e+06	1.72034e+06	1.3534e+06	1.29998e+06	1.26371e+06	1.19732e+06	1.38847e+06	681254	988135	952017	949095	1.17377e+06	989425	813574	951760	866733
Cer(d18:0_24:2)	Cer	M+H	648.629	17.1679	C42 H82 O3 N1	0.0327577	236365	54758.9	247253	80570.5	0.95597	-0.064969	1	1	169632	256098	312748	239864	282494	248309	235013	146765	230749	299413	141862	386725	197986	254757	166134	300399
Cer(d18:1_24:1)	Cer	M+H	648.629	18.3141	C42 H82 O3 N1	0.160446	283805	60739.3	334326	50515.1	0.84889	-0.23636	0.156254	0.220027	255246	378372	308308	330787	276198	286995	263824	170706	268259	271662	367342	406185	373952	307233	318209	361768
Cer(d42:2+O)	Cer	M+NH4	681.65	7.538	C42 H85 O4 N2	0.0250176	2120.46	5997.57	25.9361	48.029	81.757	6.3533	0.700128	0.769972	4.07469e-06	4.07469e-06	4.07469e-06	4.07469e-06	4.07469e-06	4.07469e-06	4.07469e-06	16963.7	4.07469e-06	102.49	4.07469e-06	4.07469e-06	4.07469e-06	4.07469e-06	104.999	4.07469e-06
Cer(d18:2_24:1)	Cer	M+H	646.613	16.7437	C42 H80 O3 N1	0.0789514	3.52319e+06	734895	3.60536e+06	612417	0.97721	-0.033261	0.792896	0.837939	3.31665e+06	4.14059e+06	4.61256e+06	3.4017e+06	3.70449e+06	3.52899e+06	3.40973e+06	2.07081e+06	3.1589e+06	3.9018e+06	2.98447e+06	4.93905e+06	3.28388e+06	3.6816e+06	3.36186e+06	3.53132e+06
Cer(d18:1_24:3)	Cer	M+H	644.598	17.8361	C42 H78 O3 N1	0.86425	2.90585e+06	730414	3.86726e+06	371085	0.7514	-0.41235	0.00740553	0.0183503	3.43288e+06	2.96982e+06	1.97831e+06	3.00733e+06	3.85721e+06	2.46146e+06	3.61914e+06	1.92061e+06	4.02427e+06	3.19279e+06	3.92151e+06	4.21995e+06	4.10159e+06	3.9704e+06	3.38927e+06	4.11828e+06
Cer(d18:0_24:5)	Cer	M+H	642.582	16.8759	C42 H76 O3 N1	0.666923	2.01034e+06	474670	2.62526e+06	353038	0.76577	-0.38502	0.018129	0.0375566	2.21857e+06	2.25238e+06	1.74572e+06	2.1148e+06	2.51277e+06	1.66228e+06	2.46706e+06	1.10916e+06	3.06209e+06	2.55985e+06	2.47058e+06	3.02536e+06	2.86106e+06	2.16177e+06	2.15939e+06	2.70194e+06
Cer(d18:0_25:0)	Cer	M+H	666.676	19.2185	C43 H88 O3 N1	0.0669099	29327.9	19696	43529.7	32960.5	0.67375	-0.56972	0.563524	0.634285	15149.8	54381.5	40849.7	32348	54333.1	3347.01	25650.9	8563.22	39854.9	40478.8	40186	7542.21	46990.8	13608.6	116795	42780.7
Cer(d18:2_25:1)	Cer	M+H	660.629	17.2833	C43 H82 O3 N1	0.236655	72872.7	17049.2	128776	19031	0.56589	-0.82141	0.000939106	0.00397777	75767.8	80153.1	68836.1	60871.6	105946	71066.3	74192.1	46148.7	135130	158127	106416	150038	127578	108285	131711	112920
Cer(d18:0_26:0)	Cer	M+H	680.692	19.517	C44 H90 O3 N1	0.011597	11715.9	10166.1	13159.6	9143.01	0.89029	-0.16765	0.916298	0.946995	6857.28	26734.4	25630.6	14902.2	4850.47	4.07469e-06	2454.44	12297.5	21126.1	24768.1	21884.2	5824.43	11459.7	4.07469e-06	15689.2	4525.23
Cer(d18:0_26:1)	Cer	M+H	678.676	18.775	C44 H88 O3 N1	0.0450838	11312.4	7436.52	6930.7	1899.28	1.6322	0.70683	0.227147	0.301073	4263.67	24940.1	19154.8	9804.65	12558.2	3036.36	7829.88	8911.33	8200.62	7917.05	5077.29	6881.54	6653.2	3908.81	6718.29	10088.8
Cer(d18:1_26:0)	Cer	M+H	678.676	19.312	C44 H88 O3 N1	0.215804	128020	43286.8	192029	42974.7	0.66667	-0.58496	0.018129	0.0375566	111107	191499	137727	105934	169289	77325.2	158294	72984.5	226350	182941	277473	150279	169670	171759	205024	152736
Cer(d18:2_26:0)	Cer	M+H	676.66	18.5814	C44 H86 O3 N1	0.0202827	54503.3	22016.5	57887.9	10774.4	0.94153	-0.08692	0.792896	0.837939	52851.9	80386.2	79957.9	61606.7	65179.3	47652.4	27663	20728.7	69217.5	63771.6	35196.2	50517.4	59231.6	57204.8	62596.1	65368.3
Cer(d18:2_26:1)	Cer	M+H	674.645	17.7763	C44 H84 O3 N1	0.108953	36039.7	9998.66	53489.4	15535	0.67377	-0.56967	0.0135873	0.0294907	42969.9	32245.1	56244.8	33040.3	31176.2	38493.6	30926.6	23220.8	48946.7	87955.8	48978.9	40969	63765.4	46619.9	42334.6	48344.7
Cer(d18:1_26:4)	Cer	M+H	670.613	18.14	C44 H80 O3 N1	0.0389934	16939.8	10654.4	12070.6	7960.43	1.4034	0.48892	0.430897	0.508992	6620.16	9633.37	25474.8	12160	13331.8	35331.8	26161.6	6804.64	15519.8	7666.9	9977.98	21152.3	13291.7	23942.2	2702.78	2310.91
Cer(d18:1_26:5)	Cer	M+H	668.598	16.808	C44 H78 O3 N1	0.163087	673607	179114	760591	164240	0.88564	-0.17521	0.636502	0.703383	645235	838689	911562	701630	455932	735274	719822	380714	576163	889610	611721	1.0463e+06	721755	887692	709741	641746
Cer(d18:1_26:6)	Cer	M+H	666.582	19.0694	C44 H76 O3 N1	0.419097	204587	99145.1	500652	367615	0.40864	-1.2911	0.0313241	0.0589837	126290	249151	179997	123864	402283	116565	275434	163112	243873	1.13284e+06	286242	992805	379032	540148	295193	135086
Cer(m17:1_16:0)	Cer	M+H	508.509	16.4039	C33 H66 O2 N1	0.250277	942.754	1476.29	61339.8	23864.3	0.015369	-6.0238	0.000785338	0.00397777	4.07469e-06	1099.8	4.07469e-06	4.07469e-06	2770.79	4.07469e-06	3671.44	4.07469e-06	89569.9	33998.6	84120.1	39393.6	77286.9	29712.2	75006.9	61630.5
Cer(m17:0_18:0)	Cer	M+H	538.556	16.274	C35 H72 O2 N1	0.099389	23581.1	4919	13065	3281.97	1.8049	0.85192	0.0027616	0.00834568	26825	24922.6	14194.4	22689.6	31072.4	20606	23054.9	25284.1	11642.2	11673	8088.58	13526.6	11018.4	14599.5	19127	14844.8
Cer(m35:1+O)	Cer	M+H	552.535	11.744	C35 H70 O3 N1	0.126427	49194.3	61020.6	14251.9	12200.6	3.4518	1.7873	0.187959	0.257782	2658.63	32360.2	30389	76086.4	54300.8	185930	11829.4	4.07469e-06	5949.66	34900.6	21135.6	4.07469e-06	17071.7	11808.7	23148.7	4.07469e-06
Cer(m35:2+O)	Cer	M+H	550.519	10.4076	C35 H68 O3 N1	0.0236892	44311.9	39858.8	49837.2	26678.6	0.88913	-0.16953	0.430897	0.508992	7065.22	25663.2	29635.2	63179.2	77203.7	120619	26906.1	4224.03	39368.8	80649.3	89740	10128.5	27451.1	51083.7	61349.5	38927.1
Cer(m18:0_18:0)	Cer	M+H	552.571	16.4271	C36 H74 O2 N1	0.358288	171458	41443.3	50214	12359.5	3.4145	1.7717	0.000939106	0.00397777	197928	213055	151473	136834	148819	169789	115974	237790	50102.6	39332.9	29789.3	65739.4	51738.8	51411.9	46743.6	66853.9
Cer(m18:1_18:0)	Cer	M+H	550.556	15.1816	C36 H72 O2 N1	0.197294	47076.8	13090.1	10018.2	4338.65	4.6991	2.2324	0.000939106	0.00397777	56984.4	68146.9	43386.2	26711.8	34119	46612.3	45869.3	54784.8	12157	15799.4	5545.43	6898.7	14573.9	11891.6	9550.64	3729.24
Cer(m17:1_19:1)	Cer	M+H	548.54	17.1565	C36 H70 O2 N1	0.39291	150112	43314.9	7848.27	4449.57	19.127	4.2575	0.000939106	0.00397777	200331	122508	148652	192170	171172	122923	172885	70256.3	5595.45	11525.3	11121.3	15704	4487.16	2470.62	5742.24	6140.06
Cer(m17:0_20:0)	Cer	M+H	566.587	17.4497	C37 H76 O2 N1	0.157738	22993	6239.02	46884.9	6863.86	0.49041	-1.0279	0.000939106	0.00397777	23098.5	22469.8	11939.3	21582.1	26053.1	17841.3	30510.1	30450	39447.7	39990.6	45044.8	52104.9	41531.5	51445.8	46516.7	58997.4
Cer(m18:0_20:0)	Cer	M+H	580.603	17.5515	C38 H78 O2 N1	0.0929473	209798	39367.7	186549	34740.4	1.1246	0.16944	0.227147	0.301073	252946	228975	142879	197187	215726	179302	197940	263429	171267	163923	139324	221348	160983	240373	182303	212873
Cer(m18:1_20:0)	Cer	M+H	578.587	16.4882	C38 H76 O2 N1	0.010183	251347	65365.2	248238	50270.3	1.0125	0.017956	1	1	347005	344020	170980	235314	226875	181753	250280	254546	247060	204530	167625	307561	303195	283021	211430	261481
Cer(m18:0_21:0)	Cer	M+H	594.618	18.0189	C39 H80 O2 N1	0.0948218	18522.6	4823.72	29386.1	6650.66	0.63032	-0.66585	0.00387604	0.0109285	25886.8	18735.1	12793.9	15491.8	22158.9	11867.4	20982.3	20264.3	27391.9	21797.4	21904.4	26865.7	33493.8	26860.2	38839.4	37936.4
Cer(m17:0_22:0)	Cer	M+H	594.618	18.3505	C39 H80 O2 N1	0.139977	17195.4	5545.9	37284.9	8421.32	0.46119	-1.1166	0.000939106	0.00397777	19237.3	14959.7	9599.67	17950.7	24950.8	11514.9	24320.2	15030.2	38613.5	27432	29913.8	33732.7	32320.2	40030.6	53762.8	42473.8
Cer(m18:0_22:0)	Cer	M+H	608.634	18.4341	C40 H82 O2 N1	0.0649288	144455	22601.1	157583	26451.4	0.91669	-0.12549	0.270149	0.348585	170488	183307	135518	138610	117954	131225	126167	152373	141374	131978	119975	181081	146631	171160	172230	196237
Cer(m18:1_22:0)	Cer	M+H	606.618	17.6008	C40 H80 O2 N1	0.324283	172340	42005.8	472453	722013	0.36478	-1.4549	0.0239487	0.0468347	237176	196178	114633	190316	180562	130405	196222	133228	210924	176010	2.25856e+06	229077	234511	231737	199406	239399
Cer(m18:1_22:4)	Cer	M+H	598.556	16.4222	C40 H72 O2 N1	0.13454	30119.5	4645.97	13041	3886.07	2.3096	1.2076	0.000939106	0.00397777	33376.1	26053.5	26139.9	36467.9	25910.8	27882.2	36634.7	28490.9	15369.7	11911.9	17825.1	11295.5	12031.4	5924.33	12353.4	17616.9
Cer(m18:0_23:0)	Cer	M+H	622.65	18.7977	C41 H84 O2 N1	0.118432	23991.4	6676.06	39167.1	5914.8	0.61254	-0.70713	0.00135938	0.00497765	29171.2	28496.7	32950.9	19909.8	15860.3	22605.1	14866.9	28070	47386.3	33523.4	42775.8	32558.5	39316.8	36567.5	34364.2	46844.5
Cer(m18:0_24:0)	Cer	M+H	636.665	19.1381	C42 H86 O2 N1	0.00970782	62681.3	15844.5	61247.7	10967.7	1.0234	0.03338	1	1	60379.8	83963.4	86712.7	54308.2	68456.4	42448.5	50988.4	54193	64463.7	59378.8	52028.4	45662.8	56252	64368.5	65405.6	82421.5
Cer(m18:0_24:1)	Cer	M+H	634.65	18.3563	C42 H84 O2 N1	0.0799151	152112	38880.5	133747	21911.4	1.1373	0.18563	0.372029	0.452003	151656	166875	240003	136577	131735	139232	111437	139383	142283	137984	110359	145731	112750	113946	131449	175474
Cer(m18:1_24:0)	Cer	M+H	634.65	18.8842	C42 H84 O2 N1	0.0730757	35070.8	18474	23476.1	8847.43	1.4939	0.57908	0.227147	0.301073	22514.6	60041.8	48326.2	46455.9	51272.5	14639.3	12184.9	25131.5	29852.2	26326.6	16021.4	11902	19565.5	21248.3	22437.7	40455.3
Cer(m43:1)	Cer	M+Na	670.647	7.46769	C43 H85 O2 N1 Na1	0.00805216	29945.5	5784.35	30900.1	10987.1	0.96911	-0.045271	0.958122	0.972038	27137.6	31952.5	23914.3	23522.1	38856.7	25575	36325	32280.9	28008	20563.1	26451.8	32600.8	30134.7	56686.7	25795	26960.5
Cer(t18:0_16:0+O)	Cer	M+H	572.525	12.0971	C34 H70 O5 N1	0.186102	118739	25503.2	78730.8	10380.6	1.5082	0.59279	0.00194753	0.00637467	103493	166080	99258.9	102884	132803	117451	138500	89438.5	69096.2	75277.4	101234	79701.9	84091.8	70985.4	78004.6	71454.8
Cer(t18:0_18:0)	Cer	M+H	584.561	14.7724	C36 H74 O4 N1	0.307797	122024	36959.7	28802.3	16064.7	4.2366	2.0829	0.000939106	0.00397777	163192	53020.4	93146.3	113078	157217	114706	150560	131272	13565.7	22828.3	43675.4	44537.7	24110.5	7468.45	52190.8	22041.8
Cer(t18:0_22:0)	Cer	M+H	640.624	17.2444	C40 H82 O4 N1	0.263328	510965	134538	388698	98784.6	1.3146	0.39457	0.103562	0.156612	585437	732531	406644	476650	582779	442494	567048	294136	323848	234809	371398	488684	462049	285069	462588	481143
Cer(t18:0_23:0)	Cer	M+H	654.639	17.741	C41 H84 O4 N1	0.0514046	188255	66162.8	203712	43455.9	0.92412	-0.11384	0.874826	0.905144	250740	271022	130630	160539	220648	130917	244429	97114.3	244350	178767	250652	209957	225820	124902	166566	228678
Cer(t18:0_26:0)	Cer	M+H	696.686	18.9444	C44 H90 O4 N1	0.0390034	44323.8	21933.9	37836	9717.67	1.1715	0.22832	0.792896	0.837939	37667.8	83773.3	35314.7	69020.9	47008.7	19449.7	23951.9	38403.5	46473	35856.1	46853.5	30002.5	19977.2	42518.3	47013.1	33994.6
CerG3GNAc1(d34:1)	CerG3GNAc1	M+H	1227.76	12.0197	C60 H111 O23 N2	0.439179	286508	77800.3	97469.8	20288.9	2.9395	1.5555	0.000939106	0.00397777	228512	302781	318543	266196	218707	446940	205160	305222	118819	95636.3	77142.5	63699.5	117963	116929	100059	89510
CerG3GNAc1(d36:1)	CerG3GNAc1	M+H	1255.79	13.4932	C62 H115 O23 N2	0.186823	36854.3	17738.3	1055.84	2986.38	34.905	5.1254	0.000553535	0.00397777	39124.9	39250.6	50342.2	37032.7	13443.1	69285.9	18954	27401	4.07469e-06	4.07469e-06	8446.75	4.07469e-06	4.07469e-06	4.07469e-06	4.07469e-06	4.07469e-06
CerG3GNAc1(d38:1)	CerG3GNAc1	M+H	1283.82	14.8466	C64 H119 O23 N2	0.155524	55951.8	12042.1	28739.7	12880.3	1.9468	0.96114	0.0027616	0.00834568	63534.7	52276.6	53112.3	53653.9	33539.9	74591.6	64304.6	52600.7	25586.8	9411.5	30463.9	22906.4	15707.6	45665.8	36418.8	43756.5
CerG3GNAc1(d40:1)	CerG3GNAc1	M+H	1311.85	16.0881	C66 H123 O23 N2	0.311295	192955	22528.6	99196.2	30237	1.9452	0.9599	0.000939106	0.00397777	219900	181232	185726	199602	164122	230892	176589	185574	96092.8	63023.9	78297.7	77832	82564	140235	110502	145022
CerG3GNAc1(d41:1)	CerG3GNAc1	M+H	1325.87	16.654	C67 H125 O23 N2	0.0490828	17348.8	9508.53	24967.9	18197.8	0.69485	-0.52524	0.494837	0.568203	35886.1	7601.63	7469.16	23013	12998.4	17949.4	21676.2	12196.8	9217.61	20824.3	14848.4	1986.33	32171.8	48158.5	19279.6	53256.7
CerG3GNAc1(d42:1)	CerG3GNAc1	M+H	1339.88	17.1742	C68 H127 O23 N2	0.282887	216305	38644.9	130053	32001.8	1.6632	0.73397	0.0027616	0.00834568	236534	225662	222070	207925	147031	280648	186955	223611	124666	95245.9	112206	98129.7	115637	157762	150005	186771
CerG3GNAc1(d42:2)	CerG3GNAc1	M+H	1337.87	15.9749	C68 H125 O23 N2	0.211378	221476	42534.1	157527	49142.8	1.406	0.49155	0.0135873	0.0294907	205986	251288	231733	226224	160952	260280	161950	273392	158061	110171	112257	136137	127877	239768	151507	224433
CerG3GNAc2(d34:1)	CerG3GNAc2	M+H	1430.84	11.6103	C68 H124 O28 N3	0.112832	15528.9	11966.6	4.07469e-06	0	3811100000	31.828	0.00146006	0.00533052	7955.88	11909.9	19025.1	12241.7	8339.69	27469.5	4.07469e-06	37289.3	4.07469e-06	4.07469e-06	4.07469e-06	4.07469e-06	4.07469e-06	4.07469e-06	4.07469e-06	4.07469e-06
CerG3GNAc2(d40:1)	CerG3GNAc2	M+H	1514.93	15.6917	C74 H136 O28 N3	0.20868	69000.8	11706.9	26487.6	13388.8	2.605	1.3813	0.000939106	0.00397777	59129.2	78317.4	54887.3	64340.9	64401.8	84382.9	61872.8	84673.6	12381	17088	13828	17035.3	38461	49041.1	33505.2	30561.4
CerG3GNAc2(d41:1)	CerG3GNAc2	M+H	1528.95	16.2928	C75 H138 O28 N3	0.0332753	25767.3	5209.25	22089.4	9056.85	1.1665	0.22219	0.372029	0.452003	29373.6	29469.3	19572.8	23576.4	23238.8	32313	18530.5	30064	12070	12899.3	16562.9	16231.6	23650.3	36262.9	31838.5	27199.6
CerG3GNAc2(d42:1)	CerG3GNAc2	M+H	1542.96	16.8352	C76 H140 O28 N3	0.137049	50386.1	17874.8	24601.6	16789.6	2.0481	1.0343	0.0100817	0.023429	47245.1	64085.7	41279.6	45547.6	24989.9	82356	37378.2	60206.5	14941.4	8533.67	17382.6	10595.7	17203.2	57599.2	34310.4	36246.7
CerG3GNAc2(d42:2)	CerG3GNAc2	M+H	1540.95	15.5908	C76 H138 O28 N3	0.0408376	69618.3	25349.1	61730.1	20302.2	1.1278	0.17349	0.713191	0.769972	46975.9	74378	60517.3	62853.8	50950.4	100448	46483.6	114339	37795.2	30285	54593.6	59788.9	71020	88119.9	82122	70115.9
CerP(t32:1)	CerP	M+H	606.449	8.595	C32 H65 O7 N1 P1	0.0820805	1890.88	446.324	8052.26	1724.88	0.23483	-2.0903	0.000939106	0.00397777	1871.14	1874.96	1305.81	2253.17	2172.73	1718.36	2597.85	1333	10366.2	7699.4	9445.05	8034.67	5734.12	5510.79	8358.84	9269.04
CerPE(d18:1_24:1)	CerPE	M+H	771.637	16.847	C44 H88 O6 N2 P1	0.0180146	102484	33727.2	106397	24462.3	0.96322	-0.054068	0.713191	0.769972	84430	100923	158695	134981	98359	86967.8	108884	46629	85559.9	115780	85441.9	124978	67770.6	122358	109325	139966
ChE(13:0)	ChE	M+NH4	600.571	15.5958	C40 H74 O2 N1	0.298887	214373	53563.7	314338	34939	0.68198	-0.55219	0.00194753	0.00637467	189573	196419	282201	208401	237782	264238	228223	108149	314816	321347	294246	364999	277979	359238	314510	267566
ChE(16:0)	ChE	M+H	625.592	12.507	C43 H77 O2	0.236111	192066	17980.4	253173	32508.5	0.75863	-0.39852	0.00135938	0.00497765	191882	211458	220580	199975	189562	175446	168226	179398	242994	220050	314467	282287	220665	251652	261597	231672
ChE(18:1)	ChE	M+H	651.607	22.2937	C45 H79 O2	0.0226941	16072.8	4961.67	14280.4	2005.71	1.1255	0.17059	0.494837	0.568203	20857.9	11893.2	9148.55	16020	18971	10704	22455.6	18532.2	13197.6	14308.3	12556.5	13093.7	15219.5	12422.4	18503.6	14941.7
ChE(18:2)	ChE	M+NH4	666.618	20.7681	C45 H80 O2 N1	0.48015	320313	334711	693480	306825	0.46189	-1.1144	0.0660819	0.107911	270796	411985	4.07469e-06	258171	624998	13226.8	950492	32837.5	909704	188292	797252	1.14084e+06	509122	404117	854153	744361
ChE(20:3)	ChE	M+NH4	692.634	20.8117	C47 H82 O2 N1	0.0465598	30066.4	36680.4	40437.8	22833.1	0.74352	-0.42755	0.318069	0.399191	12038.1	29845	4.07469e-06	31576.2	65358.7	0.10191	101713	4.07469e-06	65648	0.0864177	49083.1	66067.5	28658.2	23260.7	54452.1	36332.4
ChE(20:4)	ChE	M+NH4	690.618	20.5048	C47 H80 O2 N1	0.524339	1.87109e+06	1.57523e+06	1.13202e+06	546008	1.6529	0.72499	0.270149	0.348585	1.75525e+06	2.33845e+06	95866.9	2.02224e+06	3.01258e+06	389952	4.81811e+06	536288	1.5365e+06	258879	1.54437e+06	1.44678e+06	1.25546e+06	501405	1.72963e+06	783105
ChE(20:5)	ChE	M+H	671.576	18.125	C47 H75 O2	0.0529671	12081	6661.1	6635.02	5119.63	1.8208	0.86457	0.127808	0.186204	17208.2	15418.6	23179.9	11987.5	5659.58	9748.92	11511.8	1933.4	5467.94	7575.75	16058.5	1909.02	3551.27	3706.85	2364.6	12446.2
ChE(22:5)	ChE	M+NH4	716.634	20.4932	C49 H82 O2 N1	0.126861	51488.4	46643.2	84989.3	31495.1	0.60582	-0.72303	0.155949	0.220027	42419.5	57518.8	4.07469e-06	66167.9	101826	16226.2	127748	4.07469e-06	114279	29728.8	90568.2	117483	77769.4	56471.1	116811	76804.2
ChE(22:6)	ChE	M+NH4	714.618	20.2228	C49 H80 O2 N1	0.196885	262261	329497	400202	263191	0.65532	-0.60972	0.204219	0.278051	238100	168383	4.07469e-06	138701	785961	4.07469e-06	766947	4.07469e-06	691944	4.07469e-06	429248	499516	244749	237944	808014	290202
ChE(30:0)	ChE	M+H	821.811	21.864	C57 H105 O2	0.170631	124748	86675.3	61244	72176.1	2.0369	1.0264	0.0100817	0.023429	106319	49168.5	321372	98944.9	62496.1	150674	74152.6	134861	46185.4	239013	32735	30266	38076	30000	27882.1	45794.4
ChE(32:0)	ChE	M+H	849.842	22.139	C59 H109 O2	0.259557	298451	283620	128836	214349	2.3165	1.212	0.0100817	0.023429	172566	100076	928931	177429	93527.8	446149	125531	343399	54673.7	658889	50141.9	46726.3	56909.6	51359.8	41172.5	70814.4
ChE(33:0)	ChE	M+H	863.858	22.3166	C60 H111 O2	0.321374	461018	351961	216358	324027	2.1308	1.0914	0.0100817	0.023429	312435	203959	1.24782e+06	302662	188746	576139	277675	578711	100974	1.01668e+06	100595	84329.6	124008	95076	72364.6	136841
CmE(28:1)	CmE	M+H	805.78	19.914	C56 H101 O2	0.0504789	44881.3	31313.1	35049.1	9567.12	1.2805	0.35674	0.270149	0.348585	84656.9	49105.5	4.07469e-06	56106.1	47571.3	5759.59	82877.7	32972.8	42926.1	29094.3	46241.8	35802.9	41339.4	26696.5	40062.1	18229.7
CmE(30:0)	CmE	M+H	835.827	22.0454	C58 H107 O2	0.202759	501455	510442	308262	603039	1.6267	0.70196	0.0135873	0.0294907	254909	155369	1.63291e+06	275564	149018	781999	180783	581093	106012	1.79991e+06	74051.2	86272.2	106666	99502.4	65934.4	127748
CmE(30:6)	CmE	M+NH4	840.759	20.636	C58 H98 O2 N1	0.0380382	6243.66	12954.1	1457.72	3921.31	4.2832	2.0987	0.148011	0.215299	4.07469e-06	37891.5	6274.19	1529.94	4.07469e-06	2054	4.07469e-06	2199.67	4.07469e-06	11152.5	4.07469e-06	4.07469e-06	4.07469e-06	4.07469e-06	4.07469e-06	509.337
CmE(38:2)	CmE	M+H	943.92	22.513	C66 H119 O2	0.0706765	16364.9	9454.57	26264.4	12492.5	0.62309	-0.6825	0.0831229	0.13017	25405	11376.2	10087.7	12502.6	17999.3	5879.82	34802.5	12866.3	17778.9	30770.6	18714.4	21544.4	20569.9	40039.8	12109.7	48587.1
Co(Q10)	Co	M+NH4	880.718	19.4833	C59 H94 O4 N1	2.84722	4.59207e+07	8.69373e+06	5.70916e+07	6.22084e+06	0.80433	-0.31413	0.0135873	0.0294907	5.0524e+07	4.40201e+07	3.25516e+07	5.18479e+07	5.67337e+07	3.62571e+07	5.37839e+07	4.16473e+07	5.80952e+07	4.64259e+07	6.31142e+07	6.42303e+07	5.89723e+07	5.2461e+07	6.13879e+07	5.2046e+07
Co(Q6)	Co	M+H	591.441	19.4864	C39 H59 O4	0.185897	257935	55582.4	313139	35492.2	0.82371	-0.27979	0.0405689	0.0719971	282846	267939	185749	274174	331374	192800	317750	210851	307367	236818	343711	348491	326109	299827	333510	309277
Co(Q7)	Co	M+H	659.503	18.5076	C44 H67 O4	0.508928	1.3903e+06	244638	1.72219e+06	137327	0.80729	-0.30885	0.0100817	0.023429	1.39278e+06	1.46331e+06	1.0698e+06	1.45655e+06	1.78827e+06	1.10854e+06	1.60428e+06	1.23887e+06	1.76066e+06	1.62031e+06	1.80218e+06	1.95919e+06	1.54084e+06	1.71486e+06	1.79589e+06	1.58358e+06
Co(Q8)	Co	M+H	727.566	17.1672	C49 H75 O4	0.115043	3.22351e+06	733828	3.33823e+06	477826	0.96564	-0.050449	0.372029	0.452003	3.39872e+06	2.8981e+06	2.46439e+06	3.63742e+06	3.34789e+06	2.41774e+06	4.68604e+06	2.9378e+06	3.00816e+06	2.9804e+06	3.64143e+06	3.4342e+06	3.93665e+06	2.60145e+06	3.91779e+06	3.18576e+06
Co(Q9)	Co	M+H	795.629	18.5129	C54 H83 O4	4.65781	1.1197e+08	1.63097e+07	1.37278e+08	7.11452e+06	0.81564	-0.29399	0.00387604	0.0109285	1.15104e+08	1.19268e+08	8.85684e+07	1.15853e+08	1.34605e+08	9.13828e+07	1.27223e+08	1.03759e+08	1.39796e+08	1.25283e+08	1.41607e+08	1.49549e+08	1.33478e+08	1.33514e+08	1.3924e+08	1.35761e+08
DG(16:0e)	DG	M+Na	353.266	4.087	C19 H38 O4 Na1	0.0980684	6119.85	1854.93	15144.8	2488.17	0.40409	-1.3073	0.000939106	0.00397777	7473.08	5530.49	7535.1	7801.88	7188.96	5262.33	2225.71	5941.28	20597.4	13438.7	14707.2	15874.8	13140.7	15423.2	15253.5	12723
DG(18:0e)	DG	M+Na	381.298	17.0279	C21 H42 O4 Na1	0.0850431	19125.3	32287.9	2147.38	6073.71	8.9064	3.1548	0.0322773	0.0607477	684.031	1658.12	90806	7380.17	4.07469e-06	42723.7	4.07469e-06	9750.67	4.07469e-06	17179	4.07469e-06	4.07469e-06	4.07469e-06	4.07469e-06	4.07469e-06	4.07469e-06
DG(19:4e)	DG	M+NH4	382.295	1.384	C22 H40 O4 N1	0.127572	7325.21	4968.12	25403.3	10217.5	0.28836	-1.7941	0.00135938	0.00497765	12043.3	10179.3	1690	13403.6	2927.59	1049.05	11042.3	6266.57	24282.8	29831.1	35633.4	16510.4	14324.7	12324.6	30575.7	39743.4
DG(20:0e)	DG	M+Na	409.329	17.8495	C23 H46 O4 Na1	0.149412	64788.8	91794.5	13112.5	35426.1	4.941	2.3048	0.0496329	0.0879514	4188.64	12195.1	206915	21816.8	4.07469e-06	213379	4.07469e-06	59817.1	4.07469e-06	100713	4.07469e-06	4.07469e-06	4.07469e-06	4.07469e-06	4.07469e-06	4187.66
DG(20:1e)	DG	M+Na	407.313	16.989	C23 H44 O4 Na1	0.049582	20551.3	30580.5	9776.33	27300	2.1021	1.0719	0.0820773	0.13017	957.815	2001.58	64602.5	7374.95	4.07469e-06	73801.1	4.07469e-06	15672.5	4.07469e-06	77336.1	4.07469e-06	4.07469e-06	4.07469e-06	4.07469e-06	4.07469e-06	874.528
DG(22:1e)	DG	M+Na	435.344	17.801	C25 H48 O4 Na1	0.0242497	1665.73	4711.41	4766.87	13482.8	0.34944	-1.5169	1	1	4.07469e-06	4.07469e-06	13325.9	4.07469e-06	4.07469e-06	4.07469e-06	4.07469e-06	4.07469e-06	4.07469e-06	38135	4.07469e-06	4.07469e-06	4.07469e-06	4.07469e-06	4.07469e-06	4.07469e-06
DG(24:0e)	DG	M+Na	465.391	19.1274	C27 H54 O4 Na1	0.0998246	20476.3	26156.8	2066.65	5301.61	9.9079	3.3086	0.0933375	0.145734	9538.75	11860.2	64237.1	4.07469e-06	4.07469e-06	58189.8	4.07469e-06	19984.4	4.07469e-06	15131.2	4.07469e-06	4.07469e-06	1402.06	4.07469e-06	4.07469e-06	4.07469e-06
DG(25:0)	DG	M+Na	493.386	17.0671	C28 H54 O5 Na1	0.0856953	15787.5	20456.6	1828.59	4643.59	8.6337	3.11	0.0550395	0.0929121	1220.59	6892.78	41027.3	6674.73	4.07469e-06	53441.8	4.07469e-06	17042.5	476.879	13293.9	4.07469e-06	4.07469e-06	857.985	4.07469e-06	4.07469e-06	4.07469e-06
DG(26:0e)	DG	M+Na	493.423	19.6649	C29 H58 O4 Na1	0.254673	116354	135835	8113.17	20280.3	14.341	3.8421	0.0047294	0.0133041	26795.7	62564.3	356215	75126.7	2424.89	300270	7029.24	100409	4.07469e-06	58160.6	4.07469e-06	4.07469e-06	3044.66	4.07469e-06	4.07469e-06	3700.08
DG(26:1e)	DG	M+Na	491.407	19.1513	C29 H56 O4 Na1	0.115179	29312.5	39839.3	3253.43	8772.94	9.0097	3.1715	0.0379595	0.071333	6038.79	6349.87	106035	7614.78	4.07469e-06	73254.3	4.07469e-06	35206.8	1082.3	24945.1	4.07469e-06	4.07469e-06	4.07469e-06	4.07469e-06	4.07469e-06	4.07469e-06
DG(26:2e)	DG	M+NH4	484.436	5.1655	C29 H58 O4 N1	0.0146057	120905	52414.7	124864	38368.2	0.96829	-0.046485	0.713191	0.769972	161620	190688	90875.9	72354.4	112724	84887.6	190312	63780	108829	79731	194088	121590	79376.5	147290	149316	118693
DG(28:0e)	DG	M+Na	521.454	19.703	C31 H62 O4 Na1	0.35822	295666	373413	45976	99063.4	6.4309	2.685	0.0239487	0.0468347	71218.1	131485	1.09343e+06	169522	9089.29	598151	27703.7	264729	6760.37	290692	19215.4	3274.54	18245.4	9379.71	5015.1	15225.9
DG(28:1e)	DG	M+Na	519.438	19.7228	C31 H60 O4 Na1	0.278612	160209	190153	21029.3	39310.4	7.6184	2.9295	0.0404213	0.0719971	30678	86969.9	528968	110515	5602.3	373570	10375.2	134991	6022.52	117167	10581.7	4.07469e-06	16576.9	4251.47	4.07469e-06	13635.3
DG(28:2e)	DG	M+NH4	512.467	7.5085	C31 H62 O4 N1	0.0388692	96100.9	41016.2	105235	25659.6	0.9132	-0.13099	0.494837	0.568203	131989	135714	66683.3	55868.3	97203.7	64657.5	159066	57624	102495	69537.2	144143	110039	86264.2	126345	123404	79651.9
DG(28:3e)	DG	M+H	493.425	19.1514	C31 H57 O4	0.134448	38870	55705.3	3152.98	8294.57	12.328	3.6239	0.0379595	0.071333	6018.24	13059.4	157706	12441.5	4.07469e-06	85012.9	4.07469e-06	36721.2	4.07469e-06	23634.8	4.07469e-06	4.07469e-06	1589.06	4.07469e-06	4.07469e-06	4.07469e-06
DG(29:0e)	DG	M+Na	535.47	20.4085	C32 H64 O4 Na1	0.136648	41403	51457.1	5867.99	14570.9	7.0557	2.8188	0.0704615	0.114962	5699.9	23001.1	139423	21230.5	4.07469e-06	100379	4.07469e-06	41489.6	4.07469e-06	41814.7	2455.96	4.07469e-06	4.07469e-06	4.07469e-06	2673.18	4.07469e-06
DG(30:0e)	DG	M+Na	549.485	20.5809	C33 H66 O4 Na1	1.08335	2.1408e+06	1.39284e+06	509057	754678	4.2054	2.0723	0.00740553	0.0183503	1.21663e+06	2.02055e+06	4.35624e+06	2.24244e+06	303318	3.67909e+06	766222	2.54192e+06	196402	2.36883e+06	257053	261905	353408	251375	109029	274459
DG(30:1e)	DG	M+Na	547.47	19.7342	C33 H64 O4 Na1	0.499619	685928	814920	167524	300246	4.0945	2.0337	0.0831229	0.13017	198130	340938	2.44413e+06	423516	20250.5	1.22997e+06	64594.7	765897	32083.2	906556	67632.6	51840.2	119508	56254.4	19149.7	87169.8
DG(30:2e)	DG	M+H	523.472	20.619	C33 H63 O4	0.41088	331802	210773	89444.8	129678	3.7096	1.8913	0.00740553	0.0183503	229379	245551	624925	339624	67082.7	616166	111853	419830	22801.9	406294	64344.7	49177.3	45224.8	11938	39519.8	76257.8
DG(30:3e)	DG	M+H	521.456	20.161	C33 H61 O4	0.47973	393866	358039	50311.2	101809	7.8286	2.9688	0.00538494	0.0143212	167563	258208	983985	327338	25220.5	858835	53118.8	476659	12891.8	301455	26194.5	6444.01	18771	16173.7	4.07469e-06	20559.6
DG(30:4e)	DG	M+H	519.441	19.7054	C33 H59 O4	0.278612	160209	190153	21029.3	39310.4	7.6184	2.9295	0.0404213	0.0719971	30678	86969.9	528968	110515	5602.3	373570	10375.2	134991	6022.52	117167	10581.7	4.07469e-06	16576.9	4251.47	4.07469e-06	13635.3
DG(31:0e)	DG	M+Na	563.501	20.8132	C34 H68 O4 Na1	0.518829	517009	499026	82136.9	171681	6.2945	2.6541	0.0239487	0.0468347	135763	367390	1.35314e+06	426695	12699.7	1.14628e+06	64119	629982	13055.6	505907	25255.6	11104.2	43866.9	21049.9	4807.12	32048.8
DG(31:1e)	DG	M+Na	561.485	20.4287	C34 H66 O4 Na1	0.199882	137091	157438	42661.7	95549.8	3.2134	1.6841	0.114916	0.173641	23663.6	75716.1	443673	91363.5	4.07469e-06	295118	8426.62	158763	4.07469e-06	278204	27067.3	11528.3	7738.86	6733.08	0.00185461	10022.1
DG(31:2e)	DG	M+H	537.488	20.8225	C34 H65 O4	0.179844	105178	104552	34496.8	69995	3.0489	1.6083	0.0739906	0.120614	31393.1	69255	273218	108920	4.07469e-06	253437	14128.9	91071	4233.08	207162	10630.3	9497.69	17862.5	14952.1	4.07469e-06	11636.8
DG(16:0_16:0)	DG	M+Na	591.496	16.339	C35 H68 O5 Na1	0.126301	300418	102097	252441	67581.2	1.19	0.25102	0.372029	0.452003	334375	295138	391285	167118	261016	370741	151989	431681	188236	269220	194123	374556	315821	251473	180397	245706
DG(32:0e)	DG	M+Na	577.517	21.0073	C35 H70 O4 Na1	2.78203	1.23413e+07	5.82314e+06	3.1101e+06	3.51259e+06	3.9681	1.9885	0.00387604	0.0109285	8.93975e+06	1.40504e+07	1.80905e+07	1.35248e+07	2.68547e+06	1.85798e+07	6.20474e+06	1.66547e+07	1.57806e+06	1.15725e+07	1.71636e+06	1.41743e+06	3.66679e+06	1.6516e+06	992762	2.28527e+06
DG(32:1e)	DG	M+Na	575.501	21.0693	C35 H68 O4 Na1	0.678846	1.12213e+06	723426	403133	408451	2.7835	1.4769	0.0405689	0.0719971	751150	1.04068e+06	1.95149e+06	1.07405e+06	206536	2.22613e+06	298646	1.42834e+06	185819	1.39195e+06	194251	246102	355992	349583	143474	357898
DG(14:0_18:2)	DG	M+NH4	582.509	13.8992	C35 H68 O5 N1	0.00601979	25673.8	21724.1	24546.1	22180.7	1.0459	0.064805	0.750936	0.810485	33904.9	12361	49420.8	4896.5	8263.31	41973.9	4.07469e-06	54570	4.07469e-06	28185.2	4.07469e-06	29025.7	44449	38230.8	4.07469e-06	56477.8
DG(32:2e)	DG	M+Na	573.485	20.2074	C35 H66 O4 Na1	1.02508	1.99994e+06	1.58691e+06	435435	576866	4.593	2.1994	0.0313241	0.0589837	763018	1.66632e+06	4.53479e+06	1.93006e+06	118466	3.73929e+06	460160	2.78742e+06	210413	1.85486e+06	262169	186764	335816	259565	124493	249396
DG(32:3e)	DG	M+H	549.488	20.5854	C35 H65 O4	1.08335	2.1408e+06	1.39284e+06	509057	754678	4.2054	2.0723	0.00740553	0.0183503	1.21663e+06	2.02055e+06	4.35624e+06	2.24244e+06	303318	3.67909e+06	766222	2.54192e+06	196402	2.36883e+06	257053	261905	353408	251375	109029	274459
DG(32:7)	DG	M+NH4	572.431	9.72026	C35 H58 O5 N1	0.0469431	3515.83	463.767	6329.71	2317.71	0.55545	-0.84827	0.0660819	0.107911	3562.5	3564.74	2550.31	3676.41	3347.7	4173.44	3796.17	3455.34	7630.04	3364.72	8128.4	2508.37	7499.77	8241.85	8059.51	5204.98
DG(33:0e)	DG	M+Na	591.532	21.1841	C36 H72 O4 Na1	0.714183	946583	972823	122667	230224	7.7167	2.948	0.018129	0.0375566	317970	553456	2.45206e+06	583174	30364.5	2.39444e+06	106704	1.13449e+06	27488.2	688967	47018.3	18100.8	95007.7	42342	13005	49408
DG(33:1e)	DG	M+Na	589.517	20.8036	C36 H70 O4 Na1	0.615912	786059	811650	135707	270500	5.7923	2.5341	0.0239487	0.0468347	235030	450711	2.23622e+06	602475	22963	1.78024e+06	92400.2	868433	31850.2	803106	43405.5	14573.7	82773.8	49440.2	17854.2	42649.2
DG(33:2e)	DG	M+Na	587.501	20.4232	C36 H68 O4 Na1	0.275618	182563	208918	36353.4	78492.5	5.0219	2.3282	0.0739906	0.120614	44653.5	94645.5	579035	111565	4.07469e-06	415126	13039.9	202443	5329.34	229750	13939.1	4.07469e-06	8120.22	11424.5	0.00116043	22263.8
DG(33:3e)	DG	M+H	563.503	20.8175	C36 H67 O4	0.514434	521081	511734	85381.2	180706	6.103	2.6095	0.018129	0.0375566	138371	359318	1.39385e+06	424776	13422.7	1.16541e+06	64146.8	609350	13113.2	531550	25258.6	11109.4	43628.8	21046.3	4875.03	32468
DG(34:0e)	DG	M+Na	605.548	21.0122	C37 H74 O4 Na1	1.17156	2.65537e+06	1.47038e+06	824469	770859	3.2207	1.6874	0.0100817	0.023429	2.08074e+06	2.64772e+06	4.98001e+06	2.34595e+06	652978	3.86605e+06	988800	3.68072e+06	443404	2.6299e+06	457817	420172	1.08335e+06	551610	269198	740307
DG(34:1)	DG	M+Na	617.512	14.2159	C37 H70 O5 Na1	0.601341	54294.5	40805	418904	167996	0.12961	-2.9477	0.000939106	0.00397777	124337	53698.9	49864.5	23388.8	17775.7	56187.1	7451.74	101652	362523	503109	321294	283320	755208	442872	211635	471269
DG(16:0_18:1)	DG	M+Na	617.512	16.356	C37 H70 O5 Na1	0.601636	2.3504e+06	1.00944e+06	1.62397e+06	586611	1.4473	0.53338	0.189263	0.257782	3.42468e+06	2.02302e+06	3.18666e+06	1.33864e+06	1.46672e+06	3.06063e+06	971593	3.33125e+06	1.2028e+06	1.64427e+06	1.14853e+06	1.72857e+06	2.90981e+06	1.70102e+06	1.04561e+06	1.61113e+06
DG(34:1e)	DG	M+Na	603.532	20.9724	C37 H72 O4 Na1	2.92499	1.45004e+07	7.37493e+06	3.82718e+06	4.401e+06	3.7888	1.9217	0.00387604	0.0109285	1.09968e+07	1.46747e+07	2.29936e+07	1.56581e+07	2.77585e+06	2.24577e+07	6.48142e+06	1.99647e+07	2.32953e+06	1.41321e+07	1.77627e+06	1.19591e+06	5.6426e+06	2.07307e+06	1.07019e+06	2.39771e+06
DG(16:0_18:2)	DG	M+NH4	610.541	15.2606	C37 H72 O5 N1	0.581572	1.36924e+06	691922	2.03657e+06	790285	0.67233	-0.57277	0.127808	0.186204	2.15347e+06	1.01694e+06	1.80772e+06	840449	631902	1.86214e+06	499396	2.14192e+06	1.27027e+06	2.13533e+06	1.50643e+06	2.06631e+06	3.41096e+06	2.38653e+06	943907	2.57287e+06
DG(34:2e)	DG	M+Na	601.517	12.079	C37 H70 O4 Na1	0.504608	2.06508e+06	314091	1.71358e+06	123051	1.2051	0.26918	0.018129	0.0375566	2.12789e+06	1.91064e+06	2.42295e+06	2.18378e+06	2.17261e+06	2.28186e+06	2.03489e+06	1.386e+06	1.62652e+06	1.67472e+06	1.58901e+06	1.77817e+06	1.63078e+06	1.97833e+06	1.70428e+06	1.72683e+06
DG(16:1_18:2)	DG	M+NH4	608.525	13.9496	C37 H70 O5 N1	0.114944	46681.2	46368.8	78952.6	46055.8	0.59126	-0.75814	0.156254	0.220027	50693.5	14001.4	148350	30253.6	15801.4	55289.4	4.07469e-06	59060.9	38291.8	129470	32819.6	92117	128041	70117	16966.8	123798
DG(34:3e)	DG	M+H	577.519	13.0689	C37 H69 O4	1.3193	1.40278e+07	1.35784e+06	1.17934e+07	1.32184e+06	1.1895	0.25031	0.0100817	0.023429	1.36809e+07	1.47262e+07	1.41808e+07	1.63706e+07	1.39195e+07	1.42381e+07	1.3644e+07	1.14622e+07	1.1683e+07	9.8578e+06	1.13011e+07	1.09842e+07	1.14261e+07	1.41706e+07	1.31309e+07	1.17933e+07
DG(34:4)	DG	M+NH4	606.509	13.55	C37 H68 O5 N1	0.104969	18835.5	10327.8	4693.14	6091.7	4.0134	2.0048	0.00953795	0.023429	28701.3	24718.8	9823.73	18907.5	6656.64	27016.6	4894.28	29965.3	4717.06	4.07469e-06	4.07469e-06	15608.5	5305.72	11913.8	4.07469e-06	4.07469e-06
DG(34:4e)	DG	M+H	575.503	21.0695	C37 H67 O4	0.678344	1.12965e+06	716205	410001	428023	2.7552	1.4622	0.0313241	0.0589837	751139	1.03e+06	1.96117e+06	1.06543e+06	192380	2.23305e+06	381295	1.42271e+06	185656	1.44876e+06	196070	245947	354135	344687	144420	360332
DG(34:5e)	DG	M+H	573.488	20.195	C37 H65 O4	1.02481	1.98677e+06	1.57696e+06	428461	559192	4.637	2.2132	0.0313241	0.0589837	757631	1.65393e+06	4.51186e+06	1.91928e+06	118180	3.70321e+06	455039	2.77504e+06	209766	1.80387e+06	266695	181699	332936	257804	124939	249983
DG(35:1e)	DG	M+Na	617.548	21.1529	C38 H74 O4 Na1	0.408216	380376	365316	91262.4	125838	4.1679	2.0593	0.156254	0.220027	205072	223450	907148	223106	12517.4	925500	27020.7	519193	29991.4	394372	31634.6	28249.7	103545	61225.4	13227.8	67853.5
DG(35:2e)	DG	M+Na	615.532	20.8183	C38 H72 O4 Na1	0.19731	107016	106264	31684.8	45888.7	3.3775	1.756	0.126686	0.186204	55462.8	38389.7	266167	67035.6	4.07469e-06	243677	8401.54	176991	10381.2	139127	11648.9	4.07469e-06	45602.7	24112.8	4.07469e-06	22605.9
DG(35:3e)	DG	M+H	591.535	13.7568	C38 H71 O4	0.0864258	101949	28797.4	84251.3	19207.6	1.2101	0.27508	0.270149	0.348585	87135.7	119054	78523.1	144459	68985.1	113832	72568.8	131036	65035.9	94359.9	61682.2	75693.8	81938.9	77435.9	97564.8	120299
DG(35:4e)	DG	M+H	589.519	20.8051	C38 H69 O4	0.616064	786059	811650	135517	270570	5.8005	2.5362	0.0239487	0.0468347	235030	450711	2.23622e+06	602475	22963	1.78024e+06	92400.2	868433	31850.2	803106	43405.5	14573.7	82773.8	47919.9	17854.2	42649.2
DG(18:0_18:0)	DG	M+NH4	642.603	18.3561	C39 H80 O5 N1	0.0213667	40149.5	15721	36944.1	11986.2	1.0868	0.12004	0.713191	0.769972	75271.2	39993.4	26123.4	40257.9	41105.2	28144.4	42386.3	27914.1	47151.5	26863.9	25337	43123	57778.3	37363.1	34690.7	23245.2
DG(36:0e)	DG	M+Na	633.579	16.8835	C39 H78 O4 Na1	0.066523	114251	31506.8	128638	24542.8	0.88816	-0.17111	0.372029	0.452003	151086	113730	85579.8	145562	125958	77319.4	140509	74266.5	134816	99388.4	117165	148045	112131	157922	100822	158815
DG(18:0_18:1)	DG	M+NH4	640.587	17.4873	C39 H78 O5 N1	0.576048	1.06645e+06	769696	482954	193673	2.2082	1.1429	0.0100817	0.023429	2.81068e+06	937752	937576	557658	504816	879978	484636	1.41848e+06	409338	479399	360974	453762	909674	518170	242084	490231
DG(36:1e)	DG	M+Na	631.564	21.3055	C39 H76 O4 Na1	0.832914	1.86146e+06	1.1532e+06	764748	580566	2.4341	1.2834	0.0520296	0.0879514	1.84901e+06	1.27638e+06	3.36669e+06	1.60055e+06	330639	3.16437e+06	533062	2.77102e+06	426623	1.96413e+06	404044	300282	1.26527e+06	706637	310621	740381
DG(18:1_18:1)	DG	M+Na	643.527	16.3824	C39 H72 O5 Na1	0.565744	5.52576e+06	2.72144e+06	4.36594e+06	2.37898e+06	1.2657	0.33988	0.430897	0.508992	9.34015e+06	5.26223e+06	6.10562e+06	3.45062e+06	2.95625e+06	4.87044e+06	2.58429e+06	9.6365e+06	4.05849e+06	3.01772e+06	2.82462e+06	3.57414e+06	1.00777e+07	4.34291e+06	2.9538e+06	4.07811e+06
DG(18:0_18:2)	DG	M+NH4	638.572	16.723	C39 H76 O5 N1	0.232223	1.52697e+06	859808	1.28508e+06	386302	1.1882	0.24881	1	1	3.11322e+06	1.25591e+06	1.54724e+06	840953	842884	1.25382e+06	807863	2.55386e+06	1.06561e+06	1.26767e+06	989457	1.48076e+06	2.0038e+06	1.30205e+06	715474	1.45585e+06
DG(36:2e)	DG	M+Na	629.548	16.5041	C39 H74 O4 Na1	0.314383	680755	205055	885720	274678	0.76859	-0.37972	0.189263	0.257782	1.13206e+06	748600	542623	593796	561101	489192	625090	753580	752077	715437	735923	872655	1.34665e+06	1.0711e+06	483125	1.10879e+06
DG(18:1_18:2)	DG	M+Na	641.512	15.2926	C39 H70 O5 Na1	0.549998	660346	434641	1.25708e+06	832412	0.5253	-0.92878	0.0660819	0.107911	1.18781e+06	578447	560063	307695	223869	755290	267941	1.40165e+06	1.02697e+06	1.1109e+06	718968	801537	3.18937e+06	1.55862e+06	623705	1.02656e+06
DG(16:0_20:3)	DG	M+NH4	636.556	15.9057	C39 H74 O5 N1	0.0948928	203742	105865	243897	113947	0.83536	-0.25953	0.270149	0.348585	422999	241461	131105	144726	138219	183229	98334.7	269861	265392	190536	184678	154363	502813	264522	151426	237442
DG(36:3)	DG	M+Na	641.512	15.9057	C39 H70 O5 Na1	0.0897952	37758.9	17776.8	60494.9	51064.6	0.62417	-0.68	0.270149	0.348585	46488.9	64950.4	41040.2	21097.3	34131.4	32892.1	8682.76	52788	51346.5	61591.6	10692.8	15151.2	176419	62840.2	46853.5	59064.6
DG(36:3e)	DG	M+H	605.55	21.3499	C39 H73 O4	2.263	7.90373e+06	5.44079e+06	1.25733e+06	1.85199e+06	6.2861	2.6522	0.00387604	0.0109285	5.45712e+06	6.91647e+06	1.56627e+07	7.35212e+06	802632	1.44583e+07	1.75407e+06	1.08264e+07	504865	5.78583e+06	558531	351628	1.2406e+06	621970	312547	682669
DG(18:2_18:2)	DG	M+H	617.514	14.2234	C39 H69 O5	0.597258	72486.5	52433.5	433577	165479	0.16718	-2.5805	0.000939106	0.00397777	167379	70751.1	69603.7	48215.1	17767	52031.3	21461.4	132683	380858	516804	344093	289878	754823	462797	221213	498153
DG(18:1_18:3)	DG	M+NH4	634.541	14.513	C39 H72 O5 N1	0.381341	93081.5	125382	339453	293337	0.27421	-1.8666	0.0399796	0.0719971	24041.2	146967	209049	4.07469e-06	4.07469e-06	28977.7	4.07469e-06	335617	50722.4	623724	340528	12284.6	636248	725083	290802	36226.7
DG(16:0_20:4)	DG	M+NH4	634.541	14.9403	C39 H72 O5 N1	0.201816	743446	148775	646628	118295	1.1497	0.20129	0.156254	0.220027	928061	738547	778885	541912	723666	770709	535916	929877	601400	567205	711609	634105	867376	699735	464129	627467
DG(36:4e)	DG	M+H	603.535	20.973	C39 H71 O4	2.98708	1.49867e+07	7.86445e+06	3.82903e+06	4.41356e+06	3.914	1.9686	0.00387604	0.0109285	1.10085e+07	1.51642e+07	2.50314e+07	1.57556e+07	2.83223e+06	2.30605e+07	6.5068e+06	2.05344e+07	2.30005e+06	1.41705e+07	1.78118e+06	1.23794e+06	5.64291e+06	2.02688e+06	1.07743e+06	2.39534e+06
DG(18:3_18:2)	DG	M+NH4	632.525	13.1784	C39 H70 O5 N1	0.24262	7660.8	8396.44	71653.4	37147.2	0.10691	-3.2255	0.00816798	0.020226	8248	4.07469e-06	25121.2	4.07469e-06	4.07469e-06	9213.3	7920.77	10783.1	71920.9	64795	58694.3	53847	104939	112521	4.07469e-06	106510
DG(36:5e)	DG	M+H	601.519	11.9966	C39 H69 O4	0.579618	2.09788e+06	309516	1.6812e+06	119009	1.2478	0.31944	0.0135873	0.0294907	1.94519e+06	2.19044e+06	2.37915e+06	2.18616e+06	2.29556e+06	2.23024e+06	2.15944e+06	1.39686e+06	1.59828e+06	1.53131e+06	1.88893e+06	1.70354e+06	1.54735e+06	1.75842e+06	1.69497e+06	1.72682e+06
DG(14:0_22:6)	DG	M+NH4	630.509	13.091	C39 H68 O5 N1	0.117682	57838	34265.5	29581.5	31190.9	1.9552	0.96732	0.127527	0.186204	56494.8	35987.9	62543.3	27636.3	56450.3	79106	17763	126723	4.07469e-06	21409.8	4.07469e-06	9783.37	84388.9	40664.4	15213.4	65192
DG(36:6e)	DG	M+H	599.503	20.901	C39 H67 O4	0.144608	352983	182680	277732	144309	1.2709	0.34591	0.372029	0.452003	366946	269531	467416	349101	99510.9	685060	167351	418951	167607	586317	274195	200215	249748	281944	114260	347572
DG(22:6_14:1)	DG	M+NH4	628.494	12.0609	C39 H66 O5 N1	0.227868	106925	33232.2	42335.5	39593	2.5257	1.3367	0.00740553	0.0183503	105674	83742	80450.8	76282.5	129165	117289	88088.1	174711	44453.7	13597.5	13622.1	5520.26	126600	68646.7	32657.8	33585.9
DG(19:0_18:1)	DG	M+NH4	654.603	17.9547	C40 H80 O5 N1	0.0762384	8835.96	5407.04	18752.4	11779.3	0.47119	-1.0856	0.0405689	0.0719971	18312.6	5265	11828.1	12128.8	2424.82	5118.35	4251.89	11358.2	13965.6	15137.1	11708.1	17752.6	46834.5	17726.5	9047.72	17846.7
DG(37:1e)	DG	M+Na	645.579	21.4542	C40 H78 O4 Na1	0.0212336	23072.5	24507.8	19067.8	19524.3	1.21	0.27504	0.752538	0.811741	39634.3	9654.46	71013.7	3727.85	4.07469e-06	34064.8	2492.91	23992.3	7796.55	30222.1	1970.18	4.07469e-06	58089.3	21475.2	6023.02	26966.1
DG(19:1_18:1)	DG	M+NH4	652.587	16.9448	C40 H78 O5 N1	0.0994682	57886	37011.1	83033.4	38320.8	0.69714	-0.52048	0.0660819	0.107911	135558	52914.1	46593.4	43972.9	29058	30470.2	34073.8	90447.9	74176.1	67721.3	58659.5	67547	170953	87068.6	46749.3	91391.8
DG(19:1_18:2)	DG	M+NH4	650.572	15.9336	C40 H76 O5 N1	0.275872	46703.8	42462	142756	66594.8	0.32716	-1.6119	0.00740553	0.0183503	122930	42614.8	32898.6	21614.7	5872.19	41619.8	7211.08	98869.5	110063	143630	102159	76099.5	244307	157263	73344	235180
DG(37:3e)	DG	M+Na	641.548	15.105	C40 H74 O4 Na1	0.504782	30958.8	11242.9	258382	50878.6	0.11982	-3.0611	0.000939106	0.00397777	34875.4	15363.4	23519.1	46552.5	25018.5	26640.8	47306.2	28394.8	208973	254497	228755	296345	249659	277057	197439	354332
DG(37:4e)	DG	M+H	617.55	21.167	C40 H73 O4	0.408216	380376	365316	91262.4	125838	4.1679	2.0593	0.156254	0.220027	205072	223450	907148	223106	12517.4	925500	27020.7	519193	29991.4	394372	31634.6	28249.7	103545	61225.4	13227.8	67853.5
DG(18:0_20:1)	DG	M+NH4	668.619	18.3573	C41 H82 O5 N1	0.113568	201728	121547	249372	90493	0.80894	-0.30589	0.156254	0.220027	477180	224214	84027.3	195170	123567	122643	175618	211402	214505	203386	203208	221579	455938	270107	161347	264902
DG(38:1e)	DG	M+Na	659.595	21.6178	C41 H80 O4 Na1	0.125351	216665	126980	162485	97642.1	1.3334	0.41516	0.318425	0.399191	304400	118756	311640	163260	68739.6	329873	61786.1	374863	105932	240001	107082	54232.9	327520	219959	55428.1	189721
DG(18:0_20:2)	DG	M+NH4	666.603	16.4825	C41 H80 O5 N1	0.36735	710549	250193	964584	282207	0.73664	-0.44097	0.0520296	0.0879514	1.0365e+06	768834	587144	566206	524292	622977	444450	1.13399e+06	925667	751105	797780	841393	1.48163e+06	1.14987e+06	608080	1.16114e+06
DG(20:1_18:1)	DG	M+Na	671.558	17.4453	C41 H76 O5 Na1	0.321345	1.43354e+06	719252	1.75244e+06	429153	0.81803	-0.28978	0.127808	0.186204	2.9113e+06	1.50043e+06	846225	1.2307e+06	1.10972e+06	903985	909955	2.05604e+06	1.80354e+06	1.36486e+06	1.51764e+06	1.68873e+06	2.53195e+06	2.1646e+06	1.20508e+06	1.74313e+06
DG(20:0_18:2)	DG	M+NH4	666.603	17.726	C41 H80 O5 N1	0.405326	569179	266931	836866	191820	0.68013	-0.55611	0.0313241	0.0589837	1.13502e+06	515599	363417	356793	449472	523036	418982	791107	775264	775855	795003	752277	1.21152e+06	974948	551815	858249
DG(38:2e)	DG	M+Na	657.579	21.3163	C41 H78 O4 Na1	0.134938	53500	42127.3	92340	52337.4	0.57938	-0.78742	0.0831229	0.13017	143215	12992.6	52008.2	25441.7	45278.8	38887.5	26298	83878.3	59844.9	90091.4	59540.7	41655.6	177139	129508	36204.9	144736
DG(18:1_20:2)	DG	M+Na	669.543	15.281	C41 H74 O5 Na1	0.0891939	25110.9	19214.7	43368.2	28552.4	0.57902	-0.78832	0.103562	0.156612	8632.98	25229.5	6819.75	34439.8	24011.2	16726.2	67151.9	17875.8	38467.9	23423.5	50124.6	13620.3	107061	37519.5	48691.6	28037.3
DG(20:1_18:2)	DG	M+Na	669.543	16.503	C41 H74 O5 Na1	0.923878	1.09227e+06	575294	2.14497e+06	596640	0.50922	-0.97363	0.00740553	0.0183503	2.11866e+06	1.16859e+06	738567	733769	723380	807628	610560	1.83703e+06	1.86331e+06	1.75383e+06	1.84653e+06	2.2405e+06	3.05257e+06	2.61925e+06	1.19027e+06	2.59354e+06
DG(18:0_20:3)	DG	M+NH4	664.587	16.8268	C41 H78 O5 N1	0.0390719	198176	104055	213397	84130	0.92867	-0.10676	0.494837	0.568203	419660	152018	179751	113783	145298	119386	171224	284286	123244	211108	245096	194277	353954	172570	107490	299434
DG(38:3)	DG	M+H	647.561	17.475	C41 H75 O5	0.13381	227806	74689	178712	85067.6	1.2747	0.35017	0.189263	0.257782	263159	280237	241034	123784	99890.8	247857	307157	259331	91249.9	202933	271509	126406	38076.6	246913	258803	193806
DG(38:3e)	DG	M+H	633.582	18.344	C41 H77 O4	0.0841402	72492.6	36692.5	92433.7	29956.3	0.78427	-0.35059	0.103562	0.156612	152615	84249.1	33683.1	74079.9	45489.9	50163.1	62216	77444.8	73247.8	80293.3	85786.6	75742.5	159381	92088.7	65369.2	107561
DG(18:1_20:3)	DG	M+H	645.545	15.6052	C41 H73 O5	0.179388	159144	55844.4	232110	123599	0.68564	-0.54447	0.127808	0.186204	243681	132881	170762	128236	116248	138433	99584.2	243330	235566	164818	129180	138563	512215	273584	179169	223787
DG(16:0_22:4)	DG	M+NH4	662.572	15.8895	C41 H76 O5 N1	0.685603	1.26864e+06	620127	600332	259511	2.1132	1.0795	0.00538494	0.0143212	2.41673e+06	1.24275e+06	813505	897902	1.04123e+06	890586	796279	2.05015e+06	461108	604901	347069	467503	1.13855e+06	778068	380448	625005
DG(18:0_20:4)	DG	M+H	645.545	16.2758	C41 H73 O5	0.567906	1.27409e+06	199026	899248	169543	1.4168	0.50267	0.00538494	0.0143212	1.54354e+06	1.23348e+06	1.52893e+06	1.13858e+06	1.16373e+06	1.21073e+06	976727	1.39697e+06	874766	848588	847517	933609	1.27993e+06	832926	687668	888975
DG(38:4e)	DG	M+H	631.566	17.4013	C41 H75 O4	0.373385	646024	256809	874082	115458	0.73909	-0.43618	0.0135873	0.0294907	1.2293e+06	637681	370923	615147	612467	463640	552625	686416	816062	837916	826387	775845	1.07372e+06	1.01267e+06	744905	905155
DG(20:3_18:2)	DG	M+NH4	660.556	14.514	C41 H74 O5 N1	0.883916	339367	153318	1.13385e+06	356346	0.2993	-1.7403	0.000939106	0.00397777	429170	308972	273282	225846	302145	293397	202188	679934	1.0931e+06	981631	934645	695681	1.68019e+06	1.40081e+06	780105	1.50464e+06
DG(18:1_20:4)	DG	M+NH4	660.556	14.9524	C41 H74 O5 N1	0.0841514	2.72065e+06	874094	2.6228e+06	813779	1.0373	0.052843	0.874826	0.905144	4.09338e+06	2.54239e+06	2.60448e+06	2.01326e+06	2.39943e+06	2.29577e+06	1.77598e+06	4.04054e+06	2.37862e+06	2.49156e+06	1.95256e+06	2.2171e+06	4.27808e+06	3.25922e+06	1.72991e+06	2.67539e+06
DG(38:5e)	DG	M+H	629.55	16.5076	C41 H73 O4	0.314383	680755	205055	885720	274678	0.76859	-0.37972	0.189263	0.257782	1.13206e+06	748600	542623	593796	561101	489192	625090	753580	752077	715437	735923	872655	1.34665e+06	1.0711e+06	483125	1.10879e+06
DG(18:3_20:3)	DG	M+NH4	658.541	13.501	C41 H72 O5 N1	0.0859033	3610.63	4171.67	15996.1	15276.9	0.22572	-2.1474	0.0946411	0.147645	9666.01	4.07469e-06	8926.29	5018.88	4.07469e-06	4.07469e-06	4.07469e-06	5273.89	16445.8	7293.36	8323.78	4.07469e-06	33267.6	20849.3	4.07469e-06	41789
DG(18:2_20:4)	DG	M+NH4	658.541	13.8403	C41 H72 O5 N1	0.462574	595283	184434	918072	303564	0.64841	-0.62503	0.0405689	0.0719971	875178	525608	429330	500910	562647	553330	425394	889869	720173	949757	812533	720317	1.44951e+06	1.06387e+06	475543	1.15287e+06
DG(16:0_22:6)	DG	M+NH4	658.541	14.5088	C41 H72 O5 N1	0.825241	1.75324e+06	568896	2.61596e+06	431897	0.67021	-0.57732	0.0100817	0.023429	1.67652e+06	1.32114e+06	1.75651e+06	1.24568e+06	1.77583e+06	1.7247e+06	1.45819e+06	3.06735e+06	2.37744e+06	2.35172e+06	2.77161e+06	2.31572e+06	3.28589e+06	2.84189e+06	1.97503e+06	3.00841e+06
DG(38:6e)	DG	M+Na	649.517	12.7141	C41 H70 O4 Na1	1.2495	2.04299e+06	172197	3.4193e+06	202098	0.59749	-0.74302	0.000939106	0.00397777	2.06742e+06	1.91154e+06	1.76061e+06	2.31399e+06	1.97345e+06	2.03588e+06	2.21989e+06	2.06114e+06	3.47433e+06	3.1477e+06	3.34407e+06	3.35751e+06	3.24974e+06	3.81959e+06	3.4413e+06	3.52013e+06
DG(16:1_22:6)	DG	M+NH4	656.525	13.181	C41 H70 O5 N1	0.256673	48045.3	25783.3	137837	80363.8	0.34856	-1.5205	0.0313241	0.0589837	61518.6	25427.7	57852.2	33549.8	61938.4	72884.6	4.07469e-06	71190.8	117929	77774.8	32927.5	148385	224640	213166	52276.8	235599
DG(38:7e)	DG	M+H	625.519	20.893	C41 H69 O4	0.264239	155228	62607.3	68883.5	27379	2.2535	1.1722	0.00740553	0.0183503	236849	79812.8	212962	124884	137074	147397	79261.3	223583	75605.5	102946	34160.6	48897.6	95922.8	83420.1	31478.4	78637
DG(38:8e)	DG	M+H	623.503	20.3142	C41 H67 O4	0.162869	207673	104637	143137	77318.9	1.4509	0.53691	0.189263	0.257782	310237	118981	323854	140823	118210	192537	103470	353269	84248.8	259379	58328.8	81394.1	223626	168022	77455.6	192645
DG(19:0_20:1)	DG	M+NH4	682.634	18.649	C42 H84 O5 N1	0.130453	9146.86	14317.1	34294.6	22698.2	0.26671	-1.9066	0.0177903	0.0375566	42859.7	8452.49	4.07469e-06	9745.87	4.07469e-06	4.07469e-06	2357.68	9759.16	30248.1	16470	30190.8	5895.08	79562	48050.1	21974.1	41966.4
DG(18:2_21:0)	DG	M+NH4	680.619	17.9128	C42 H82 O5 N1	0.254661	29722.5	18021.6	101815	41660.4	0.29193	-1.7763	0.00135938	0.00497765	68368.8	25676.3	9125.11	27127.9	24794.8	13590.5	33691.9	35404.6	93639.4	76232.3	70089.8	74857.2	181770	112102	62955.1	142875
DG(18:2_21:1)	DG	M+NH4	678.603	17.0819	C42 H80 O5 N1	0.277758	20521	14434.9	97267.6	31479.5	0.21098	-2.2449	0.000939106	0.00397777	50440.6	17421.2	5219.15	17177.1	12674.8	12985.7	15066.1	33183.6	76056.9	102577	77150.5	83988.6	151196	112443	51706.8	123022
DG(19:1_20:3)	DG	M+NH4	676.587	16.2779	C42 H78 O5 N1	0.00912077	50087.3	17333	48510.4	19948.8	1.0325	0.046151	0.636502	0.703383	88017.8	49340.8	37124.2	47449.6	46723.2	38541.5	34064.8	59436.2	32267.2	50586	33485.5	35032.2	90640.9	54593.7	33847.9	57629.5
DG(19:0_20:4)	DG	M+NH4	676.587	16.8761	C42 H78 O5 N1	0.247523	7255.31	3123.46	63058	15297.7	0.11506	-3.1196	0.000939106	0.00397777	7803.76	2118.99	12748.8	8785.7	8727.72	5253.52	5561.69	7042.3	47891.2	52027.4	62535.5	84743.9	60363.2	48570.8	60900.2	87432
DG(39:4)	DG	M+H	659.561	17.947	C42 H75 O5	0.0859172	9705.29	2409.85	20738.4	11731.1	0.46799	-1.0955	0.000939106	0.00397777	11865.1	9573.98	6686.72	10008.6	9266.35	5905.47	12123.9	12212.3	16262.7	16514.8	12869.7	14338.1	47575.4	18268.8	13136.7	26941.1
DG(17:0_22:6)	DG	M+NH4	672.556	15.18	C42 H74 O5 N1	0.315983	35752.8	12760.6	127140	23336.3	0.28121	-1.8303	0.000939106	0.00397777	57465.8	20615	36808	20170.5	30652.5	32897.7	39546.7	47866.2	90103.8	128245	146274	141278	123880	134225	96459.1	156654
DG(20:0_20:1)	DG	M+NH4	696.65	19.0296	C43 H86 O5 N1	0.262324	105025	71456.7	207098	83034.1	0.50713	-0.97959	0.0239487	0.0468347	264128	117533	33356.7	108625	84839	58907.5	117187	55620.7	192855	110184	197861	115171	358458	247338	165554	269361
DG(40:1e)	DG	M+Na	687.626	21.8982	C43 H84 O4 Na1	0.0927336	61452.4	44050.4	38800.5	23551.8	1.5838	0.66339	0.430897	0.508992	82163.2	24104.3	121689	41228.1	13855.2	89406.2	11275.3	107898	26914.8	65430.9	22803	11608.2	75979.9	46502.6	15411.7	45753.1
DG(20:1_20:1)	DG	M+NH4	694.634	17.455	C43 H84 O5 N1	0.34862	206017	102117	366066	98623.4	0.56279	-0.82934	0.0100817	0.023429	405810	242291	66659.1	198560	183405	109105	190132	252173	361872	243677	330230	323935	535179	465207	265030	403400
DG(20:1_20:2)	DG	M+Na	697.574	16.2147	C43 H78 O5 Na1	0.0431969	100378	30000.2	111812	53566.3	0.89774	-0.15563	1	1	134836	88978.9	87151.1	74480.8	80689.6	83284.1	94703.4	158903	100801	94370.7	78754.2	75115.4	219575	169510	75275.5	81093.3
DG(22:1_18:2)	DG	M+NH4	692.619	17.5435	C43 H82 O5 N1	0.852729	448479	228695	1.21383e+06	348175	0.36947	-1.4365	0.00135938	0.00497765	955207	448264	212964	445682	328864	278799	386426	531626	1.00531e+06	1.00327e+06	1.03388e+06	1.12773e+06	1.66413e+06	1.65214e+06	721334	1.50285e+06
DG(40:3)	DG	M+H	675.592	17.5435	C43 H79 O5	0.271808	59741.1	21161.3	134983	30268.7	0.44258	-1.176	0.00194753	0.00637467	103420	63038.7	39378.3	62922.4	47321.7	38928.3	71405.3	51514.7	137006	99044.4	106913	132637	177511	168234	103332	155188
DG(40:3e)	DG	M+H	661.613	21.95	C43 H81 O4	0.166761	97319.4	66846.9	46829	25618.6	2.0782	1.0553	0.156254	0.220027	142320	45602.4	164937	56102.3	23793.4	173473	19625.7	152702	32495.5	80780.4	35094.7	17265.4	82972.2	53693.6	18228.5	54101.3
DG(20:2_20:2)	DG	M+Na	695.558	15.1633	C43 H76 O5 Na1	0.152861	33448	12705.8	65279.5	27061	0.51238	-0.96471	0.0100817	0.023429	49752.9	34407.1	28688.1	34384	21556.1	20903.2	23446	54446.3	59286.9	58081.8	29922.6	50091.3	79742.2	91479.7	42205.2	111426
DG(40:4)	DG	M+NH4	690.603	16.254	C43 H80 O5 N1	0.406127	606681	68729.3	434867	59119.6	1.3951	0.48036	0.00135938	0.00497765	494483	566181	630698	609153	736894	592673	634626	588737	447618	429177	461004	550106	363108	363170	434005	430750
DG(18:1_22:3)	DG	M+NH4	690.603	16.8715	C43 H80 O5 N1	0.00304643	345975	245178	347709	148586	0.99501	-0.0072123	0.792896	0.837939	577626	302761	213327	193827	219418	142005	262958	855877	507545	365330	188550	127584	476835	517343	250488	347996
DG(40:4e)	DG	M+H	659.597	21.6244	C43 H79 O4	0.126624	219770	130559	164417	99015	1.3367	0.41864	0.318425	0.399191	304750	118826	315185	161411	68756.1	353260	61832.2	374137	105917	250873	106894	56496.9	328731	221657	55427.9	189337
DG(18:1_22:4)	DG	M+NH4	688.587	15.9091	C43 H78 O5 N1	0.958484	5.40548e+06	1.81665e+06	3.79137e+06	1.2288e+06	1.4257	0.5117	0.0405689	0.0719971	8.6398e+06	5.57041e+06	3.71142e+06	4.62118e+06	4.69871e+06	3.86917e+06	4.42421e+06	7.70893e+06	3.93004e+06	3.06694e+06	2.69261e+06	2.70782e+06	6.40317e+06	4.4908e+06	3.21481e+06	3.82477e+06
DG(18:0_22:5)	DG	M+NH4	688.587	16.6965	C43 H78 O5 N1	0.635054	694783	147106	303236	62724.4	2.2912	1.1961	0.000939106	0.00397777	868130	687747	585242	633432	815325	529580	896300	542508	278756	218139	386237	391764	335469	292381	274698	248445
DG(40:5e)	DG	M+H	657.582	17.2531	C43 H77 O4	0.204909	298133	90082	419138	280648	0.7113	-0.49147	1	1	307337	299169	269656	353295	394693	236787	398400	125729	256628	132998	785348	275075	234764	197526	685054	785712
DG(40:6)	DG	M+NH4	686.572	5.46	C43 H76 O5 N1	0.236216	40119.3	21417.8	107025	44989.9	0.37486	-1.4156	0.0135873	0.0294907	38412.5	17374.2	32818.2	53777.5	83132	34161.4	44525.1	16753.4	120793	73127.3	133649	177059	106080	133562	81432.9	30497.8
DG(22:4_18:2)	DG	M+NH4	686.572	14.8857	C43 H76 O5 N1	0.637397	1.48692e+06	1.05951e+06	2.29199e+06	707349	0.64875	-0.62427	0.0239487	0.0468347	3.94622e+06	1.19139e+06	698848	1.05419e+06	1.01211e+06	918441	1.11258e+06	1.96159e+06	2.09928e+06	3.1854e+06	1.39718e+06	1.2744e+06	2.82935e+06	2.48761e+06	2.97253e+06	2.09015e+06
DG(18:1_22:5)	DG	M+NH4	686.572	15.44	C43 H76 O5 N1	0.105495	837776	205126	770240	294726	1.0877	0.12126	0.563524	0.634285	1.11345e+06	789330	565044	752358	781991	621335	998764	1.07993e+06	757682	570768	671449	385493	1.35871e+06	983625	637020	797173
DG(18:0_22:6)	DG	M+H	669.545	15.8303	C43 H73 O5	0.270091	467570	60350	569801	80380	0.82059	-0.28527	0.0239487	0.0468347	538885	402239	471850	491144	552883	407781	476310	399471	516028	524685	736766	609599	535424	513983	504459	617461
DG(40:6e)	DG	M+H	655.566	16.8875	C43 H75 O4	0.518426	749197	219712	431723	65397.5	1.7354	0.79524	0.00387604	0.0109285	652610	610566	1.04109e+06	927213	629791	746846	985846	399614	437433	574649	419635	399124	469890	384559	390548	377944
DG(22:5_18:2)	DG	M+NH4	684.556	13.9009	C43 H74 O5 N1	0.840721	333667	112141	1.06894e+06	369740	0.31215	-1.6797	0.000939106	0.00397777	468752	261501	340898	257447	284995	267934	244296	543510	934279	1.00035e+06	863543	762677	1.66445e+06	1.28563e+06	577690	1.46291e+06
DG(18:1_22:6)	DG	M+H	667.53	15.649	C43 H71 O5	0.0711912	132171	118811	162770	109905	0.81201	-0.30043	0.372029	0.452003	150245	91243.6	65959.9	69951.1	58357	397318	34679.6	189611	122160	317884	71987.1	64432.6	346760	170632	95597.9	112706
DG(40:7e)	DG	M+H	653.55	20.87	C43 H73 O4	0.557093	551797	326043	152709	94638	3.6134	1.8534	0.00538494	0.0143212	859107	345289	794836	392802	201267	593072	172198	1.0558e+06	117654	233309	67152.7	62557.4	328011	186707	65684.1	160597
DG(18:2_22:6)	DG	M+NH4	682.541	13.4139	C43 H72 O5 N1	1.61084	924582	282388	3.38002e+06	838700	0.27354	-1.8702	0.000939106	0.00397777	1.14471e+06	691194	796148	763481	901303	824930	742645	1.53224e+06	3.10534e+06	2.94757e+06	3.37882e+06	2.45455e+06	4.60753e+06	4.06981e+06	2.29428e+06	4.18224e+06
DG(40:8e)	DG	M+H	651.535	20.866	C43 H71 O4	0.0547689	202323	119546	179549	93960.1	1.1268	0.17228	0.636502	0.703383	358876	76728.7	155009	130724	327789	142999	84987.8	341474	217767	70505.9	128850	46000.1	285138	299758	162447	225928
DG(40:9e)	DG	M+H	649.519	20.3084	C43 H69 O4	0.124347	182432	98703.5	135690	68162.1	1.3445	0.42704	0.430897	0.508992	287843	112080	197209	161232	114667	136888	81212.1	368325	123574	140649	101558	37383.7	265168	174009	83568.3	159613
DG(18:1_23:0)	DG	M+NH4	710.666	19.3576	C44 H88 O5 N1	0.15337	6218.71	8702.51	36364.5	23957.9	0.17101	-2.5478	0.00377219	0.0109285	26193.6	9107.43	4.07469e-06	4346.9	4528.17	4.07469e-06	5573.62	4.07469e-06	44066.7	6130.98	47042.6	18156	84886.1	21218.8	32507.8	36907.2
DG(18:2_23:0)	DG	M+NH4	708.65	18.901	C44 H86 O5 N1	0.0689452	4.07469e-06	0	9560.06	15404.8	4.2622e-10	-31.128	0.0324742	0.0610871	4.07469e-06	4.07469e-06	4.07469e-06	4.07469e-06	4.07469e-06	4.07469e-06	4.07469e-06	4.07469e-06	4.07469e-06	4.07469e-06	33218.7	8323.12	34922.3	16.3859	4.07469e-06	4.07469e-06
DG(18:2_23:1)	DG	M+NH4	706.634	18.0054	C44 H84 O5 N1	0.194257	11012.9	6999.08	49055.1	16612.9	0.2245	-2.1552	0.000939106	0.00397777	25581.6	12243.9	4143.02	10449	10444.1	2130.91	10598.1	12512.6	44300.1	36388.2	42406.8	38225.9	79843.7	54267.6	31016.3	65992.5
DG(19:0_22:4)	DG	M+NH4	704.619	17.602	C44 H82 O5 N1	0.0870034	6414.56	9035.65	17163.8	5901.03	0.37373	-1.4199	0.0135873	0.0294907	28558.6	2751.64	3633.09	5777.54	4046.63	2047.9	2591.67	1909.44	24843.1	14234.5	15171.7	7252.94	22437.6	21156.7	12363.9	19850
DG(19:1_22:4)	DG	M+NH4	702.603	16.498	C44 H80 O5 N1	0.0796926	51652.8	18044.1	65818.6	18484.1	0.78478	-0.34965	0.156254	0.220027	84980	57911	29034.7	45359.8	55242.7	32055.6	45183.9	63454.9	72929	42259.7	51525.1	61866.6	86350	70260.2	47466.7	93891.3
DG(19:0_22:6)	DG	M+NH4	700.587	16.2589	C44 H78 O5 N1	0.178933	10636.3	4685.03	41061.4	10187.4	0.25903	-1.9488	0.000939106	0.00397777	20287.2	11280.5	5914.26	8030.93	14108.9	6680.35	9719.36	9068.95	39507.4	35208.1	40984.7	47895	48408.8	31881	26464.1	58142.2
DG(19:1_22:6)	DG	M+NH4	698.572	15.1564	C44 H76 O5 N1	0.240498	19644.3	11099.3	77729.7	24776.4	0.25273	-1.9844	0.000939106	0.00397777	37596.7	4639.03	11506.3	8392.95	21166.3	19227.9	26310.2	28314.7	60020.2	60242.8	69699.5	54214.4	115414	86720.6	61706.1	113820
DG(20:0_22:1)	DG	M+NH4	724.681	19.6279	C45 H90 O5 N1	0.234828	66639.4	47400.4	142574	54968.2	0.4674	-1.0973	0.0239487	0.0468347	135420	77382.4	11792.6	62522.6	101450	26368.3	108632	9547.92	182912	56922.3	206693	110758	186534	75708.3	157776	163289
DG(20:4_22:6)	DG	M+NH4	706.541	13.0408	C45 H72 O5 N1	0.317014	364491	53610.2	227604	116817	1.6014	0.67936	0.0313241	0.0589837	379372	336726	264733	367864	398809	426688	325951	415789	198693	161971	195305	46875.3	384159	386338	164848	282644
DG(20:1_22:1)	DG	M+NH4	722.666	18.9804	C45 H88 O5 N1	0.599276	207279	95834.5	583041	176629	0.35551	-1.492	0.00135938	0.00497765	374850	207905	81716.8	293056	183715	121443	247681	147861	574502	360815	506659	382454	771307	808349	503201	757043
DG(42:2)	DG	M+Na	727.621	18.9804	C45 H84 O5 Na1	0.199117	25387.9	16085.9	70736.3	25947	0.35891	-1.4783	0.00194753	0.00637467	49380.9	34119.3	9993.38	38636	21752.4	9817.17	34306	5098	64182.1	47566.9	66353.2	43211.2	120472	69675.6	57246.9	97182.8
DG(24:1_18:2)	DG	M+NH4	720.65	18.3885	C45 H86 O5 N1	0.46103	94706.1	41834.3	305764	84829.3	0.30974	-1.6909	0.000939106	0.00397777	183070	83298.8	47859.3	114226	83477.3	54606.7	94775.8	96334.2	264734	212356	264813	268469	385796	389808	224603	435533
DG(20:0_22:3)	DG	M+NH4	720.65	18.651	C45 H86 O5 N1	0.0387138	11262.1	4301.43	15656.6	10024.9	0.71932	-0.4753	0.372029	0.452003	17211.3	11861.7	7810.5	16345.1	11248	4901.45	12997.8	7720.61	17837.4	7723.58	7843.96	2564.97	32188.2	25383.9	20061.2	11649.5
DG(20:1_22:3)	DG	M+NH4	718.634	17.7937	C45 H84 O5 N1	0.101276	117834	47041.5	150615	75962	0.78235	-0.35411	0.227147	0.301073	179637	114144	49839.4	124504	92268.4	63965.8	162228	156085	192360	115630	122483	959.738	258746	172413	146419	195913
DG(20:0_22:4)	DG	M+NH4	718.634	18.0481	C45 H84 O5 N1	0.0362709	61635.6	22146.2	55064.3	18130.2	1.1193	0.16265	0.372029	0.452003	101747	61982.1	27820.8	66116.7	60395.7	41617.3	76875.4	56530.1	63721.3	37221.4	50520	32293.7	91700.9	59174.4	52547.6	53335.3
DG(42:4e)	DG	M+H	687.629	18.7548	C45 H83 O4	0.348979	151084	65616.3	24362	11632	6.2016	2.6326	0.000939106	0.00397777	134336	149158	99161.1	209185	200895	98032	254772	63131.2	22304.4	17305.3	27266.9	13629.7	51247.7	18033.7	22410.1	22698
DG(20:1_22:4)	DG	M+NH4	716.619	17.0446	C45 H82 O5 N1	0.143042	730947	222294	645722	212442	1.132	0.17886	0.318425	0.399191	1.07002e+06	659817	361655	838770	715111	518663	778573	904968	713806	462061	542904	362589	1.05822e+06	770180	644590	611427
DG(22:1_20:4)	DG	M+NH4	716.619	17.3649	C45 H82 O5 N1	0.120052	106728	31262.8	135812	35171.4	0.78585	-0.34767	0.127808	0.186204	162793	102805	59986.2	109257	116127	71480.1	115343	116037	130617	89868.5	123054	110023	169823	187610	107368	168134
DG(42:5)	DG	M+NH4	716.619	17.7255	C45 H82 O5 N1	0.0353351	47872.4	21489.7	41206.6	22465.1	1.1618	0.21632	0.372029	0.452003	76834.4	44579.7	9133.63	56406.7	52821.5	33565	70371.7	39266.3	39837.8	32790.8	51876.1	7923.03	87652.6	39573.4	34139.6	35859.1
DG(42:5e)	DG	M+NH4	702.639	18.209	C45 H84 O4 N1	0.182119	83463.8	35122.4	40928.2	7946.54	2.0393	1.0281	0.018129	0.0375566	84951.6	76900.5	67165.6	127740	100613	51637.1	129466	29237.2	53297.7	30956.9	48383.6	39066.1	46691	32486.1	35826.4	40717.9
DG(20:2_22:4)	DG	M+NH4	714.603	15.826	C45 H80 O5 N1	0.718991	823626	91674.2	1.31432e+06	154656	0.62666	-0.67425	0.000939106	0.00397777	847840	747227	714493	814212	1.00701e+06	775343	885099	797786	1.1135e+06	1.1542e+06	1.53005e+06	1.30721e+06	1.3178e+06	1.19344e+06	1.40514e+06	1.49321e+06
DG(42:6)	DG	M+H	697.577	15.826	C45 H77 O5	0.034831	32176.7	14735.5	38493.6	24644	0.8359	-0.2586	0.792896	0.837939	59854.8	33920.3	19446.3	25247	25740.9	17060.5	28039.2	48104.6	43255.9	8457.48	13607.6	23297.8	83650.7	59109.1	35837.5	40732.3
DG(20:1_22:5)	DG	M+NH4	714.603	16.2206	C45 H80 O5 N1	0.213588	673902	197274	801284	225603	0.84103	-0.24978	0.227147	0.301073	1.07206e+06	643849	417775	643014	628721	494675	777159	713961	799974	673183	554235	635981	1.20998e+06	1.05246e+06	657356	827101
DG(20:0_22:6)	DG	M+NH4	714.603	17.0248	C45 H80 O5 N1	0.34891	127405	51514	274044	97438.9	0.46491	-1.105	0.0027616	0.00834568	229391	113308	49542.2	151872	118481	96937.2	141997	117711	232396	180484	281270	185550	461521	346280	194164	310685
DG(42:6e)	DG	M+NH4	700.624	17.901	C45 H82 O4 N1	0.143071	213216	85212.5	165082	38059.7	1.2916	0.36913	0.372029	0.452003	208472	184116	154904	333447	235491	153111	336302	99883.4	191952	106648	228989	160660	168076	124672	159523	180138
DG(20:3_22:4)	DG	M+NH4	712.587	15.1592	C45 H78 O5 N1	0.571495	525195	149325	965669	378439	0.54387	-0.87868	0.0100817	0.023429	779003	539101	384527	449975	440767	423614	451610	732963	973145	838958	451509	633414	1.59152e+06	1.34175e+06	750219	1.14483e+06
DG(20:1_22:6)	DG	M+H	695.561	15.7706	C45 H75 O5	0.180581	145713	42277.6	204421	70657	0.71281	-0.48841	0.127808	0.186204	208381	146716	85838	137834	136794	122314	121212	206615	197524	176128	168925	117461	349578	260891	177413	187448
DG(42:7e)	DG	M+H	681.582	16.852	C45 H77 O4	0.143456	91918.7	119390	33219.2	75713.9	2.767	1.4683	0.0405689	0.0719971	9042.96	29206.1	348593	43586.5	3856.61	179069	19181.4	102815	8826.15	220209	5982.72	1285.82	3548.87	1701.86	7582.36	16617
DG(22:4_20:4)	DG	M+NH4	710.572	14.3637	C45 H76 O5 N1	0.268191	232057	85896.2	356866	143022	0.65027	-0.6209	0.0831229	0.13017	266040	400899	173178	199249	178475	227054	124650	286914	393419	362322	237445	165844	604651	501828	316301	273119
DG(20:2_22:6)	DG	M+NH4	710.572	14.6772	C45 H76 O5 N1	0.264426	239619	102975	370982	165040	0.64591	-0.63061	0.127808	0.186204	294443	201560	180689	380937	221152	178727	84661.2	374783	368581	248793	302065	156661	620769	541881	235389	493714
DG(22:5_20:4)	DG	M+NH4	708.556	13.5171	C45 H74 O5 N1	0.0381416	201240	30425.9	189459	78259.9	1.0622	0.087034	0.636502	0.703383	235398	167946	159222	185004	218330	211097	190744	242183	187477	131707	102532	134931	279370	303513	125191	250949
DG(25:1_18:1)	DG	M+NH4	736.681	19.2635	C46 H90 O5 N1	0.193054	2218.87	2162.68	36610.4	10404	0.060608	-4.0444	0.000930972	0.00397777	5402.92	887.553	2872.85	4430.74	401.628	4.07469e-06	3755.3	4.07469e-06	38254	24415.3	46439.1	30318.4	56699.4	33759.6	33248.4	29748.6
DG(22:6_21:0)	DG	M+NH4	728.619	17.4055	C46 H82 O5 N1	0.125379	7092.54	7703.53	27882.6	16905	0.25437	-1.975	0.0100817	0.023429	19759.9	154.67	221.846	13380.8	7040.35	988.798	14011.7	1182.25	33209.6	9702.4	15510.9	12378	60810	36153.4	20742.5	34554
DG(22:6_21:1)	DG	M+NH4	726.603	16.3739	C46 H80 O5 N1	0.220437	18339.9	8022.83	67438.1	22037.6	0.27195	-1.8786	0.000939106	0.00397777	18030.8	8017.02	9894.92	27249.3	26329	10703.2	26630.9	19864.5	54206.8	45469.9	54388.7	54416.3	107557	84847.3	53777.9	84840.6
DG(20:1_24:0)	DG	M+NH4	752.713	20.114	C47 H94 O5 N1	0.103859	372.784	692.258	14547.7	12508.8	0.025625	-5.2863	0.00517999	0.0143212	4.07469e-06	4.07469e-06	4.07469e-06	4.07469e-06	1589.42	4.07469e-06	1392.85	4.07469e-06	27332.2	4.07469e-06	37081.2	1475.69	12181.3	16291.7	12997.2	9022.65
DG(22:6_22:6)	DG	M+NH4	730.541	12.571	C47 H72 O5 N1	0.719129	323318	81119.8	823459	183635	0.39263	-1.3487	0.000939106	0.00397777	246969	199272	293565	427034	342642	289567	363988	423505	725535	672806	887665	557549	939263	1.10404e+06	717466	983353
DG(44:2)	DG	M+NH4	750.697	18.9882	C47 H92 O5 N1	0.223285	30156.3	19266.5	91355.5	43687.5	0.3301	-1.599	0.0135873	0.0294907	60730.1	39943.9	16143.7	40592.9	24793.3	4645.45	44016.1	10385	87038.2	34287.5	68044.4	38565.3	144938	146905	91465.7	119601
DG(20:1_24:1)	DG	M+NH4	750.697	19.5731	C47 H92 O5 N1	0.275007	28270.3	26056.7	107264	32970.5	0.26356	-1.9238	0.00387604	0.0109285	74220.9	15273.9	4.07469e-06	49379.1	47580.4	7511.86	24079.2	8116.93	127125	44481.2	136349	67996.2	118650	131779	114030	117701
DG(26:1_18:2)	DG	M+NH4	748.681	19.07	C47 H90 O5 N1	0.244803	29011.9	14646.2	85979	15092.3	0.33743	-1.5673	0.000939106	0.00397777	52328.4	39679	12250.6	23981.7	38748.6	12512.9	35132.4	17461.5	66078.9	101132	66891.1	82666.6	107008	86920.6	80291.1	96843.8
DG(22:1_22:4)	DG	M+NH4	744.65	17.968	C47 H86 O5 N1	0.0760945	98001.5	34283.9	117335	43299.5	0.83523	-0.25976	0.494837	0.568203	144700	86545.1	42291.3	128178	97175.3	62457.5	123205	99459.3	147442	71967.2	85061.2	67177	197103	132680	118793	118458
DG(22:1_22:5)	DG	M+NH4	742.634	17.6554	C47 H84 O5 N1	0.110123	81657.4	29798.4	107281	32133	0.76116	-0.39374	0.227147	0.301073	112029	67638.8	29610.2	107647	79660.4	63023.2	118049	75600.9	113270	68412.8	101817	67009.7	157963	143455	110850	95468.5
DG(22:0_22:6)	DG	M+NH4	742.634	17.9784	C47 H84 O5 N1	0.200722	28062	17199.3	76622	32243.9	0.36624	-1.4491	0.00387604	0.0109285	65142.9	22792.9	8795.89	30054.1	26724.4	21936.2	35212.9	13836.9	82614	50170.4	66579.2	33180.1	136162	93928.4	56391.8	93949.9
DG(22:3_22:4)	DG	M+NH4	740.619	16.4619	C47 H82 O5 N1	0.13672	235094	61400.9	187199	81938.9	1.2558	0.32866	0.189263	0.257782	332519	211022	166935	210445	308187	167597	218877	265170	254409	129580	88310.6	116282	322822	256971	170540	158680
DG(22:1_22:6)	DG	M+NH4	740.619	16.9415	C47 H82 O5 N1	0.549498	196162	62170.7	516642	167521	0.37969	-1.3971	0.000939106	0.00397777	258939	135032	97661.7	253479	222260	149583	255661	196678	402700	382904	403311	430109	807023	692000	385062	630030
DG(22:4_22:4)	DG	M+NH4	738.603	15.4449	C47 H80 O5 N1	0.166009	115333	32299.4	70540.8	44286.8	1.635	0.70927	0.0313241	0.0589837	121005	147590	46603.8	139230	138031	104823	124849	100531	91863.8	15081.4	42454.2	14461.7	135614	109929	91307.2	63616.1
DG(22:3_22:5)	DG	M+NH4	738.603	15.9401	C47 H80 O5 N1	0.0473677	140159	43301.3	128637	28130.3	1.0896	0.12376	0.372029	0.452003	150545	137177	56198.3	164738	128144	113757	170741	199976	124225	113711	91451.1	102783	150495	171736	117873	156824
DG(22:4_22:5)	DG	M+NH4	736.587	14.949	C47 H78 O5 N1	0.0236294	433338	80804.8	424488	93997.9	1.0208	0.029768	0.494837	0.568203	335251	481418	443507	515315	503067	289613	427783	470751	388738	395272	364278	319678	618875	501799	419032	388236
DG(22:6_23:1)	DG	M+NH4	754.634	17.4381	C48 H84 O5 N1	0.124404	14967.1	5419.25	34708	15638	0.43123	-1.2135	0.0100817	0.023429	21798.5	12093.9	8002.74	13984.2	17083.4	7613.48	19769.5	19390.9	31992.4	17910.9	33089.7	16977.6	64074.8	41446.4	26244.9	45927.5
DG(24:0_22:5)	DG	M+NH4	772.681	18.9725	C49 H90 O5 N1	0.10898	5628	4245.18	21368.3	13462.3	0.26338	-1.9248	0.0135873	0.0294907	12512.5	7032.77	0.0278632	4975.51	8735.19	3456.59	7759.58	551.842	24890.4	7533.44	11572.4	5648.88	38527.7	21658.1	19192	41923.2
DG(24:0_22:6)	DG	M+NH4	770.666	18.7468	C49 H88 O5 N1	0.146015	6771.87	4791.69	33050.6	20102.2	0.20489	-2.287	0.00740553	0.0183503	15444.4	2566.15	1170.66	11116.9	4606.82	9057.94	6132.12	4080.01	38041.6	14645	27634.6	4399.98	67416.5	40391.5	22460.8	49414.4
DG(24:1_22:6)	DG	M+NH4	768.65	17.8925	C49 H86 O5 N1	0.286788	65330.1	21815.9	155081	49332.4	0.42126	-1.2472	0.000939106	0.00397777	98092.3	50339.3	37893.4	83701	51391.8	68696.3	85444.8	47082.1	148375	109438	108125	132657	195518	201905	109955	234679
DG(33:1_16:0)	DG	M+NH4	822.791	19.954	C52 H104 O5 N1	0.0211048	47272.7	20223.1	41097	72881.7	1.1503	0.20198	0.0831229	0.13017	36422.7	44350.2	56686.6	30728.3	44385	51765	24062.6	89781.2	964.98	21642.8	451.724	3410.53	211655	8505.34	9698.93	72446.5
DG(50:0)	DG	M+Na	843.778	21.177	C53 H104 O5 Na1	0.25254	71215.9	32093.1	139742	23079.9	0.50962	-0.97249	0.0027616	0.00834568	122802	34042.3	80560.4	70254.4	74134.6	36244.9	45809.5	105879	169461	133580	115647	104184	143139	157849	130961	163112
DG(34:1_18:1)	DG	M+NH4	862.822	21.283	C55 H108 O5 N1	0.420695	279774	77554	462040	50960.1	0.60552	-0.72376	0.00194753	0.00637467	432581	218441	272382	320046	280494	174772	237436	302040	494270	489309	465101	389621	447776	456131	404762	549350
DG(53:1)	DG	M+NH4	878.854	21.5309	C56 H112 O5 N1	2.95459	1.29217e+07	1.348e+07	129436	52915.8	99.831	6.6414	0.00538494	0.0143212	131352	241404	3.0728e+07	1.70046e+07	112576	3.04494e+07	3.92999e+06	2.07766e+07	104581	214624	111517	93091.1	83413.9	117116	98792.7	212351
DG(54:1)	DG	M+NH4	892.869	22.122	C57 H114 O5 N1	0.907168	1.47113e+06	580193	508343	356869	2.894	1.533	0.0027616	0.00834568	2.19261e+06	662672	2.21508e+06	1.50272e+06	851139	1.67311e+06	1.04777e+06	1.62392e+06	401726	1.37514e+06	445183	305030	352238	390210	296001	501221
DG(36:1_18:1)	DG	M+NH4	890.854	21.54	C57 H112 O5 N1	0.0986001	771443	201700	718635	148868	1.0735	0.1023	0.874826	0.905144	1.14504e+06	551607	715785	816448	720468	514916	783504	923773	942375	775918	783935	468468	830839	614755	611146	721645
DG(54:2)	DG	M+NH4	890.854	21.822	C57 H112 O5 N1	0.863844	2.12202e+06	731094	1.15688e+06	391903	1.8343	0.8752	0.0135873	0.0294907	3.08813e+06	1.09632e+06	3.11161e+06	2.2551e+06	1.45805e+06	2.00916e+06	1.61523e+06	2.34256e+06	1.19103e+06	2.01049e+06	1.16768e+06	722517	1.10418e+06	958373	836321	1.26447e+06
DG(54:3)	DG	M+H	871.811	21.504	C57 H107 O5	0.1155	161233	33954.7	134831	24234.7	1.1958	0.258	0.0831229	0.13017	215238	102708	162623	156591	148411	139622	172769	191904	178200	126162	135954	102275	120805	159667	118268	137315
DG(55:2)	DG	M+NH4	904.869	21.5297	C58 H114 O5 N1	4.97588	3.24447e+07	2.02702e+07	3.22775e+06	5.68323e+06	10.052	3.3294	0.00194753	0.00637467	2.05393e+07	3.1707e+07	5.46428e+07	3.28055e+07	4.99743e+06	6.19254e+07	9.93025e+06	4.30099e+07	241785	1.6778e+07	169198	146749	4.30377e+06	153347	1.25026e+06	2.77893e+06
DG(56:1)	DG	M+Na	925.856	22.3643	C59 H114 O5 Na1	0.24757	127810	35981.2	61548.4	14680.8	2.0766	1.0542	0.00135938	0.00497765	181159	88318.9	91594.6	170270	120332	101971	153542	115291	50646.6	90544.2	64793.5	47312	51991.3	51240.6	62598.1	73261
DG(38:1_18:1)	DG	M+NH4	918.885	21.815	C59 H116 O5 N1	0.206396	539589	120386	449656	95485.5	1.2	0.26304	0.0831229	0.13017	719734	308421	597479	588906	536712	445648	552255	567558	487035	564765	540567	319475	395260	336085	419553	534508
DG(56:2)	DG	M+Na	923.84	22.08	C59 H112 O5 Na1	0.185409	175652	33412.8	127737	32632.3	1.3751	0.45954	0.0100817	0.023429	209063	142282	131528	208250	181769	140507	211437	180376	106569	201745	136270	97500.9	109094	118285	119137	133297
DG(58:2)	DG	M+NH4	946.916	22.0696	C61 H120 O5 N1	0.349083	480552	116349	309784	121044	1.5512	0.63343	0.018129	0.0375566	654052	298751	542687	570768	409629	419185	401392	547956	284534	575046	347451	183780	244516	282710	218835	341403
DG(60:3)	DG	M+NH4	972.932	22.302	C63 H122 O5 N1	0.684896	751580	212120	274818	94969.9	2.7348	1.4514	0.00135938	0.00497765	1.02708e+06	437433	935650	895287	590732	530546	739593	856325	260670	444636	367954	162441	247621	216817	188468	309940
GM3(d40:1+O)	GM3	M+H	1253.81	15.1788	C63 H117 O22 N2	0.0972133	24617.4	10677.4	43626.4	28714.7	0.56428	-0.82553	0.189263	0.257782	24432.9	34240.9	6834.68	40892.4	18723.7	31578.4	19557.8	20678.4	20516.4	11914.9	33208.8	33167.2	26836.7	97163.7	70430.4	55773.6
GM3(d42:1+O)	GM3	M+H	1281.84	16.344	C65 H121 O22 N2	0.015307	9434.93	5753.17	7783.75	8449.3	1.2121	0.27755	0.528309	0.606261	4.07469e-06	15905.9	13228.4	10670.1	6390.92	13174	2677.77	13432.4	2546.79	4.07469e-06	3764.39	1994.3	2861.01	22878.3	17976.6	10248.5
Hex1Cer(d18:1_16:0)	Hex1Cer	M+H	700.572	13.0799	C40 H78 O8 N1	0.208155	75516.9	29746.5	24875.4	19837.2	3.0358	1.6021	0.00384992	0.0109285	29917.8	93911.5	125210	60283.1	63990.8	100615	58203.3	72003.5	24329.4	35458.7	4.07469e-06	37326.3	31282.1	4.07469e-06	57565	13041.4
Hex1Cer(d37:4+2O)	Hex1Cer	M+H	768.562	17.163	C43 H78 O10 N1	0.0641624	45480	22946.3	32922.6	23075.1	1.3814	0.46616	0.318425	0.399191	5563.43	62174.5	73913.3	69517.7	43392.4	28956.4	46997.7	33324.8	29123.4	57389.4	3298.62	36339.7	72873.7	33505.1	18268.6	12581.9
Hex1Cer(d18:1_20:0)	Hex1Cer	M+H	756.635	15.7923	C44 H86 O8 N1	0.700801	316564	53727.7	801164	204923	0.39513	-1.3396	0.000939106	0.00397777	314028	328474	252275	301721	390771	266954	397099	281190	579729	721855	699637	1.09205e+06	602309	920384	707324	1.08603e+06
Hex1Cer(d18:1_21:0)	Hex1Cer	M+H	770.65	16.4838	C45 H88 O8 N1	0.489785	141741	40663	390043	121858	0.3634	-1.4604	0.000939106	0.00397777	139235	120035	135605	147878	180572	86104.6	215057	109442	342074	299501	311997	569081	320553	392397	292387	592353
Hex1Cer(d18:1_22:0)	Hex1Cer	M+H	784.666	17.0601	C46 H90 O8 N1	0.0648419	464167	51095.7	482073	41966.2	0.96286	-0.054609	0.563524	0.634285	427423	537799	393889	515318	482308	486208	462161	408228	522510	427724	471837	470585	450485	454007	553975	505463
Hex1Cer(d18:1_23:0)	Hex1Cer	M+H	798.682	17.54	C47 H92 O8 N1	0.216098	123221	13297.2	170008	17125.5	0.72479	-0.46436	0.000939106	0.00397777	141938	127912	126215	107581	114979	111372	141301	114468	187092	157746	176768	154161	147001	171974	167483	197836
Hex1Cer(d18:2_23:0+O)	Hex1Cer	M+H	812.661	22.1472	C47 H90 O9 N1	0.073407	37534.8	15653.1	54629.7	43491.5	0.68708	-0.54146	0.792896	0.837939	55249	20023.9	36267.4	29800.9	57278.2	52533.6	30964.4	18160.7	11054.1	66043	98176.7	29104.7	36242.8	47358.5	13370.5	135687
Hex1Cer(d18:1_24:0)	Hex1Cer	M+H	812.697	17.9902	C48 H94 O8 N1	0.0855412	217042	54363	194056	28741.2	1.1184	0.1615	0.713191	0.769972	169363	295682	264038	194360	192370	282463	167076	170983	224487	164290	199948	203446	206363	141208	189023	223683
Hex1Cer(d18:1_24:0+O)	Hex1Cer	M+H	828.692	16.329	C48 H94 O9 N1	0.200046	98108	17362.5	54014.9	20883.8	1.8163	0.86101	0.00194753	0.00637467	102146	135187	89494.9	102935	78919.4	92048	83593.1	100541	65093.8	31347.2	46785	66490	57720.2	60262.3	19429.4	84991.7
Hex1Cer(d18:1_24:1)	Hex1Cer	M+H	810.682	16.7936	C48 H92 O8 N1	0.245614	529779	130263	636166	64280.5	0.83277	-0.26401	0.0313241	0.0589837	469962	565576	468280	517868	803614	374059	592058	446818	630667	520171	699588	647952	623792	645165	731033	590957
Hex1Cer(d18:2_26:0+O)	Hex1Cer	M+H	854.708	19.711	C50 H96 O9 N1	0.0726197	144142	53286.6	125091	25739.1	1.1523	0.20451	0.713191	0.769972	98463.2	144078	259684	119072	108397	181208	114079	128151	95854.3	144797	102414	124005	154080	90790	136752	152036
Hex1Cer(t18:0_16:0+O)	Hex1Cer	M+H	734.578	12.0964	C40 H80 O10 N1	0.173828	236253	54370.4	187992	19136	1.2567	0.32966	0.0831229	0.13017	202679	311927	170054	201128	299996	245499	273976	184761	180484	171038	225103	203957	173829	176276	175541	197712
Hex1Cer(t18:0_24:0)	Hex1Cer	M+H	830.708	17.5111	C48 H96 O9 N1	0.111729	114970	23728.5	93772.2	13965.2	1.2261	0.29403	0.0520296	0.0879514	159401	133499	103102	101479	130515	92903.2	106121	92742.6	96048.3	76138.4	94811	84414.9	104184	86931.9	86459.4	121190
Hex1Cer(t18:0_24:0+O)	Hex1Cer	M+H	846.703	17.384	C48 H96 O10 N1	0.318462	132343	19694.9	233682	42124.1	0.56634	-0.82026	0.000939106	0.00397777	142646	140413	127257	155082	130950	108838	153091	100466	279128	210618	306734	187048	228435	236345	235170	185979
Hex2Cer(d18:1_16:0)	Hex2Cer	M+H	862.625	12.6397	C46 H88 O13 N1	0.136685	50957.6	14168.2	76342.4	19046.2	0.66749	-0.58319	0.0135873	0.0294907	56837	52630.6	24980.4	74183.4	56065.7	40238.4	48891.2	53834.2	86753.3	34609.3	85480.8	76112.3	91181.3	66887.3	93549.7	76164.7
Hex2Cer(d18:2_16:0)	Hex2Cer	M+H	860.609	11.1482	C46 H86 O13 N1	0.0894718	9650.49	5286.47	721.946	2041.97	13.367	3.7406	0.00353839	0.0106844	10530	4327.79	14875.7	10577.5	11265.1	4.07469e-06	9451.91	16176	4.07469e-06	5775.57	4.07469e-06	4.07469e-06	4.07469e-06	4.07469e-06	4.07469e-06	4.07469e-06
Hex2Cer(d18:1_18:0)	Hex2Cer	M+H	890.656	14.1755	C48 H92 O13 N1	0.246648	95174.2	47791.3	22017.2	26820.1	4.3227	2.1119	0.0111092	0.0258007	118208	86950.4	94730	140285	152543	103969	64708.8	4.07469e-06	4.07469e-06	41256.4	14433	4.07469e-06	12079	76377.4	31992	4.07469e-06
Hex2Cer(d18:1_19:0)	Hex2Cer	M+H	904.672	14.8161	C49 H94 O13 N1	0.310026	71237.5	24823.9	162560	22686.8	0.43822	-1.1903	0.000939106	0.00397777	97509.3	64086.7	55274.6	75455	89978.6	82591.1	85040.6	19964	194599	177294	119508	144874	155861	171237	169249	167859
Hex2Cer(d18:0_20:0)	Hex2Cer	M+H	920.703	15.906	C50 H98 O13 N1	0.140667	7021.24	5157.72	27287.8	8726.67	0.2573	-1.9585	0.000930972	0.00397777	9290.9	11362.4	12655.8	10238.2	9514.15	3108.46	4.07469e-06	4.07469e-06	22268.8	29483.1	15392.1	22785.7	23551	31683.9	28330.8	44806.9
Hex2Cer(d18:1_20:0)	Hex2Cer	M+H	918.688	15.469	C50 H96 O13 N1	0.795769	956618	277539	1.63112e+06	259346	0.58648	-0.76985	0.000939106	0.00397777	1.10784e+06	1.05925e+06	828800	1.128e+06	1.09933e+06	975141	1.13606e+06	318517	1.43189e+06	1.42402e+06	1.667e+06	1.41985e+06	1.42652e+06	1.88499e+06	1.68027e+06	2.11443e+06
Hex2Cer(d18:2_20:0)	Hex2Cer	M+H	916.672	14.2434	C50 H94 O13 N1	0.245635	76578	27030.5	140235	22054.1	0.54607	-0.87284	0.000939106	0.00397777	95607.3	72602.5	101178	93452.4	59197.6	96471.6	73571.5	20543.7	141043	176966	128985	159752	107259	127665	152390	127818
Hex2Cer(d18:1_21:0)	Hex2Cer	M+H	932.703	15.9122	C51 H98 O13 N1	0.0840605	153501	150518	118360	23626.9	1.2969	0.37506	0.430897	0.508992	414322	48971.6	309707	60697.8	65104.2	253272	70828	5106.86	128259	77972.6	121527	88390.8	148126	132075	132364	118167
Hex2Cer(d18:0_22:0)	Hex2Cer	M+H	948.735	17.0942	C52 H102 O13 N1	0.108888	14657.5	7160.42	27869.2	4327.45	0.52594	-0.92703	0.00194753	0.00637467	24112.6	14425.1	11422.5	19006.8	14852.9	13832.1	19607.8	4.07469e-06	26275	23838	25168.8	27381	22940.8	30370.5	31139.9	35839.3
Hex2Cer(d18:1_22:0)	Hex2Cer	M+H	946.719	16.6562	C52 H100 O13 N1	0.669396	931506	313788	1.44817e+06	164167	0.64323	-0.63659	0.00135938	0.00497765	1.30862e+06	1.1148e+06	791060	1.17051e+06	965355	812809	1.00259e+06	286300	1.42176e+06	1.18028e+06	1.3343e+06	1.37651e+06	1.43082e+06	1.61885e+06	1.52377e+06	1.69905e+06
Hex2Cer(d18:2_22:0)	Hex2Cer	M+H	944.703	15.5367	C52 H98 O13 N1	0.235419	102728	47376.9	174884	41138.1	0.5874	-0.76758	0.0100817	0.023429	165389	89022.5	141206	134485	113465	97803.8	64266.4	16183.6	196214	161088	137075	147790	127499	192967	181413	255025
Hex2Cer(d18:1_23:0)	Hex2Cer	M+H	960.735	17.1565	C53 H102 O13 N1	0.446334	325219	98305.8	534106	54551.5	0.6089	-0.71572	0.000939106	0.00397777	423846	348229	336592	378942	369557	298519	347156	98909.5	557925	496466	525172	479735	519218	493668	549427	651236
Hex2Cer(d18:2_23:0)	Hex2Cer	M+H	958.719	16.1348	C53 H100 O13 N1	0.0914995	46294.2	19238.5	62335.8	14925.5	0.74266	-0.42923	0.189263	0.257782	58237	51367.3	74063.6	53039.1	45540	31116.2	47747.1	9243.1	66852.9	50250.4	56244.9	80369.4	82709.1	44882.2	46765.5	70612.1
Hex2Cer(d18:1_24:0)	Hex2Cer	M+H	974.75	17.6468	C54 H104 O13 N1	0.246469	382255	114985	482403	48959.5	0.7924	-0.3357	0.018129	0.0375566	418660	412752	445813	490747	336703	434675	399787	118900	474098	523357	467564	461705	385510	501800	496236	548950
Hex2Cer(d18:1_24:0+O)	Hex2Cer	M+H	990.745	15.9692	C54 H104 O14 N1	0.159075	140824	34601.2	103594	18988.9	1.3594	0.44295	0.018129	0.0375566	163828	185726	161478	148954	119075	141812	134369	71348.1	91802.9	100397	68386.2	105704	101477	124761	106781	129442
Hex2Cer(d18:1_24:1)	Hex2Cer	M+H	972.735	16.5561	C54 H102 O13 N1	0.0581051	525521	161327	498696	95584.2	1.0538	0.075586	0.563524	0.634285	578767	550622	783019	618368	436891	555255	456118	225125	490110	599406	316065	547788	466615	607503	433699	528385
Hex2Cer(d18:1_25:0)	Hex2Cer	M+H	988.766	18.1142	C55 H106 O13 N1	0.0472782	15176.5	5798.26	19581.9	3786.31	0.77503	-0.36768	0.0831229	0.13017	19251.7	15723.6	26025.7	18381.4	10320.4	10736.6	11744.3	9228.3	21666.2	19415.6	16570.1	17404.5	18786.4	15301.4	19989.1	27522.2
Hex2Cer(d43:2)	Hex2Cer	M+H	986.75	17.9021	C55 H104 O13 N1	0.0414203	18631.9	5321.85	23147.5	8406.05	0.80492	-0.31308	0.430897	0.508992	16747.6	29181.8	17254.4	22360.3	11868.3	13966.4	18903.4	18772.8	16908.4	14644.3	16611.1	27310.8	35974.3	17310.9	22148.5	34271.9
Hex2Cer(d45:2)	Hex2Cer	M+H	1014.78	18.5882	C57 H108 O13 N1	0.0507545	45394.3	8424.95	37441.6	19104.2	1.2124	0.27787	0.430897	0.508992	39388.5	54233.1	54633.2	47754.5	34085.9	42199.1	54194.7	36665.1	15602.8	20306.9	17126.7	60179.2	52677	31552.3	40610.8	61477.2
Hex2Cer(d45:3)	Hex2Cer	M+H	1012.77	17.9016	C57 H106 O13 N1	0.0567261	17472.3	5551.13	24064.1	9336.28	0.72607	-0.46181	0.018129	0.0375566	18251.1	30282.8	14251.6	16562.9	14045.6	16079.7	17921.8	12382.5	19910.4	20586.7	17679	22889.9	46677.8	19344.5	21888.3	23535.8
Hex2Cer(m38:2)	Hex2Cer	M+H	900.677	15.434	C50 H94 O12 N1	0.31363	97385.8	42911.9	199791	32684.8	0.48744	-1.0367	0.000939106	0.00397777	142242	63325.2	56795.4	141886	132720	118532	92292.4	31292.7	163606	200180	207693	199386	144619	230899	206956	244991
Hex2Cer(m40:2)	Hex2Cer	M+H	928.708	16.684	C52 H98 O12 N1	0.247438	125845	49193.4	198296	18370.7	0.63463	-0.65601	0.00387604	0.0109285	197505	152836	92545.1	156930	125380	98544.7	145813	37206.2	207226	168351	180440	204836	189990	195893	223229	216404
Hex2Cer(m41:2)	Hex2Cer	M+H	942.724	17.185	C53 H100 O12 N1	0.155958	39926.1	13334.6	67132.9	11161.4	0.59473	-0.74969	0.000939106	0.00397777	52326.8	43393	46623.1	44466.8	42768.4	35183.4	45560.9	9086.41	64669	65113.6	58035.9	53498.4	67910.5	66144.5	70463.8	91227.8
Hex2Cer(m42:3)	Hex2Cer	M+H	954.724	16.5358	C54 H100 O12 N1	0.0582171	70877.9	22695.7	60871	10554.2	1.1644	0.21958	0.103562	0.156612	70632.7	69016.4	115360	73070.9	72407.7	72153.6	62884	31497.7	58625.3	65125.6	46391.5	54547	59565.9	82105.2	55121.9	65485.8
Hex2Cer(t18:0_20:0)	Hex2Cer	M+H	936.698	14.8097	C50 H98 O14 N1	0.0955355	41368.3	17558	25659.8	11099.2	1.6122	0.68902	0.0520296	0.0879514	60225	53238.7	32079.1	52100.4	30807.9	40176.9	55019.6	7298.79	28083.8	14220.6	22958.7	8806.42	28009.2	24570.8	34085.6	44543
Hex2Cer(t18:0_22:0)	Hex2Cer	M+H	964.729	16.082	C52 H102 O14 N1	0.154437	135426	41827.5	97746.6	14641.1	1.3855	0.47039	0.0135873	0.0294907	159997	185853	123626	150539	143490	122680	152439	44786.1	107726	68897.7	89091.9	107131	91597.8	103742	97820.7	115966
Hex2Cer(t18:0_23:0)	Hex2Cer	M+H	978.745	16.6527	C53 H104 O14 N1	0.0515357	24507.3	16509	16745.9	9794.72	1.4635	0.5494	0.372029	0.452003	57750	22975.4	27196.2	24760.1	11346.8	23299	28730.6	4.07469e-06	27389.4	0.0138615	7737.07	19394.4	24748.3	16348.7	11635.2	26713.7
Hex2Cer(t18:0_24:0)	Hex2Cer	M+H	992.761	17.1786	C54 H106 O14 N1	0.0816437	94666.2	28887	78528	14573.2	1.2055	0.26964	0.0520296	0.0879514	122322	113927	92655.3	115611	89496.6	99539.6	94009.2	29768.3	76308.6	65347.2	89764.4	63883.5	66533.4	73018.1	88507.3	104861
Hex2Cer(t18:0_24:1)	Hex2Cer	M+H	990.745	15.9659	C54 H104 O14 N1	0.159173	140801	34757.9	103492	18988.7	1.3605	0.44414	0.018129	0.0375566	164537	187463	160257	149331	118208	140151	134300	72159.5	91809.5	101100	68332.3	104845	100884	124766	106748	129449
Hex2Cer(t43:2)	Hex2Cer	M+H	1002.75	17.5103	C55 H104 O14 N1	0.1363	32568.9	13692	59649.6	24778.1	0.546	-0.87302	0.0313241	0.0589837	43936.6	57033.2	25887.8	38811.7	22462.5	21314.6	34871.7	16233.1	32432.5	35409.7	37137.9	62400.3	97089.9	50996.9	74612.1	87117.4
Hex2Cer(t45:0)	Hex2Cer	M+H	1034.81	18.9728	C57 H112 O14 N1	0.060454	143940	46785	127262	46793.3	1.1311	0.17767	0.270149	0.348585	177422	241944	110367	151310	110753	100454	127083	132188	96561.4	95864	92712.3	105098	217791	114091	112732	183244
Hex2Cer(t45:1)	Hex2Cer	M+H	1032.79	18.958	C57 H110 O14 N1	0.0842502	50194.3	17002.8	36927.6	9585.6	1.3593	0.44282	0.103562	0.156612	61769.6	71187.6	41650.8	40400.8	50518.3	36585.3	73112.3	26329.8	46851.3	34843.9	46819.7	24677.9	30644.1	34036.2	27869.8	49677.9
Hex2Cer(t20:1_25:1)	Hex2Cer	M+H	1030.78	17.88	C57 H108 O14 N1	0.0149558	46071.6	16166.6	43866.5	10294.8	1.0503	0.070758	0.874826	0.905144	58694	58477.4	43004.3	71151.6	31604.8	27807.4	49700.8	28132.3	39488.8	40744.2	38395.2	63550.7	53644.3	40515.3	30140.9	44452.5
Hex3Cer(d18:1_16:0)	Hex3Cer	M+H	1024.68	12.042	C52 H98 O18 N1	0.120107	18986.4	16825	4.07469e-06	0	4659600000	32.118	0.00146006	0.00533052	7055.26	32322.3	21648.5	26101.6	5075.13	50016.6	4.07469e-06	9671.39	4.07469e-06	4.07469e-06	4.07469e-06	4.07469e-06	4.07469e-06	4.07469e-06	4.07469e-06	4.07469e-06
Hex3Cer(d18:1_22:0)	Hex3Cer	M+H	1108.77	16.4362	C58 H110 O18 N1	0.188606	96300	20445.7	55898.5	17272.6	1.7228	0.78473	0.0027616	0.00834568	110946	105956	93581.3	82051.8	76637.7	134727	73145.4	93355.3	54483.4	38744.5	45142.6	44253.9	51381.8	70579.5	50924	91678.1
Hex3Cer(d18:1_23:0)	Hex3Cer	M+H	1122.79	16.9854	C59 H112 O18 N1	0.038854	12814.4	2294.73	15886	4464.55	0.80665	-0.30999	0.127808	0.186204	16494.9	13742.2	15149.6	13633.5	10495.3	11795.6	10351.7	10852.6	15834.6	12297.9	12370	12230.6	15029.4	20774.2	14112.2	24438.7
Hex3Cer(d18:1_24:0)	Hex3Cer	M+H	1136.8	17.4783	C60 H114 O18 N1	0.114904	57797.6	16841.8	38065.1	13230.8	1.5184	0.60254	0.0135873	0.0294907	75054.1	62340.6	66209	43209.6	36486.5	78158.6	36193.2	64729.5	36270.4	31366.2	35705.5	26441.4	26079.2	51255.7	33005.7	64396.7
Hex3Cer(d18:1_24:1)	Hex3Cer	M+H	1134.79	16.309	C60 H112 O18 N1	0.137753	73418.5	21982.7	47041.4	13117.7	1.5607	0.64221	0.0239487	0.0468347	77453.6	77010.1	95074.1	62438.8	38394.6	93087.7	48006.2	95882.9	55566.6	27828.5	38875.3	37067.4	43558	61835.9	45501.5	66098.1
Hex3Cer(t18:0_24:0)	Hex3Cer	M+H	1154.81	16.968	C60 H116 O19 N1	0.0590447	8246.75	3700.07	3349.77	3108.55	2.4619	1.2998	0.0311998	0.0589837	11364	9088.34	1510.77	8848.06	4691.64	11761.1	6882.49	11827.6	4.07469e-06	2806.71	3150.64	4.07469e-06	3275.53	6007.12	2173.86	9384.28
LBPA(16:0_18:1)	LBPA	M+H	749.533	13.0601	C40 H78 O10 P1	0.619722	2.68968e+07	1.62498e+07	2.33622e+07	2.3614e+07	1.1513	0.20326	1	1	3.13611e+07	3.75407e+07	3.83788e+07	3.88175e+07	3.99846e+07	1.83634e+06	2.56645e+07	1.59085e+06	5.09759e+07	1.50134e+06	1.70702e+06	5.04073e+07	1.51276e+06	1.83269e+06	3.84669e+07	4.04934e+07
LBPA(16:0_18:2)	LBPA	M+H	747.517	12.021	C40 H76 O10 P1	0.38728	2.56487e+06	193234	2.82172e+06	276576	0.90897	-0.13769	0.0831229	0.13017	2.51004e+06	2.44074e+06	2.26592e+06	2.53391e+06	2.86245e+06	2.49283e+06	2.80336e+06	2.60972e+06	2.39979e+06	2.5586e+06	2.86244e+06	3.23975e+06	2.74082e+06	2.87607e+06	2.76065e+06	3.13567e+06
LBPA(18:1_18:2)	LBPA	M+H	773.533	11.1415	C42 H78 O10 P1	0.0799864	120752	29561.8	137335	20396.6	0.87925	-0.18566	0.270149	0.348585	169211	86543.5	85627.4	115774	152995	129206	105615	121041	167102	109182	124630	159848	128390	144423	118601	146501
LBPA(18:2_18:2)	LBPA	M+H	771.517	10.1115	C42 H76 O10 P1	0.209007	21825.9	5201.6	64578.1	17308.9	0.33798	-1.565	0.000939106	0.00397777	32333.8	19970.8	14634.9	22556.9	21796.6	17789.3	21143.2	24381.6	61464.6	62605	85886.1	86684	37974.4	58342.3	48064.8	75603.8
LBPA(16:0_20:4)	LBPA	M+H	771.517	11.7878	C42 H76 O10 P1	0.125932	71076.8	10396.6	52428	8356.24	1.3557	0.43904	0.0027616	0.00834568	82130.6	66167.1	59496.1	85218.1	63404.4	62325.9	82386.5	67486	64769.7	54232.1	35134.7	57420.9	53317.7	52377.5	49532	52639.1
LBPA(18:0_20:4)	LBPA	M+H	799.548	13.126	C44 H80 O10 P1	0.21253	45243.1	17722.1	1303.52	3686.91	34.708	5.1172	0.000553535	0.00397777	62449.4	53657.3	11222.8	34280.8	38333.1	42184.4	65689.8	54126.8	4.07469e-06	4.07469e-06	10428.2	4.07469e-06	4.07469e-06	4.07469e-06	4.07469e-06	4.07469e-06
LBPA(18:1_20:4)	LBPA	M+H	797.533	10.9217	C44 H78 O10 P1	0.171494	78104.1	22254	38948.7	27515	2.0053	1.0038	0.0313241	0.0589837	84773.1	58452.3	56145	104894	110806	51179	74880.3	83703.7	18125.6	57230.7	78226.1	57673.9	61368.4	16919.7	4288.92	17756.1
LPA(16:0)	LPA	M+Na	433.233	3.444	C19 H39 O7 N0 P1 Na1	0.0401436	7537.37	3655.16	4532.21	2464.99	1.6631	0.73385	0.0831229	0.13017	11593.1	5328.57	3225.35	7146.83	5812.68	12360.8	11102.1	3729.46	2832.04	3339.49	2557.76	6743.13	2938.68	7217.41	2276.54	8352.62
LPC(12:0)	LPC	M+H	440.277	1.565	C20 H43 O7 N1 P1	0.0473123	3490.93	4020.61	3.74222	10.5846	932.85	9.8655	0.084745	0.132486	8101.65	4.07469e-06	4.07469e-06	4.07469e-06	7506.7	3631.45	8687.64	4.07469e-06	4.07469e-06	4.07469e-06	4.07469e-06	4.07469e-06	29.9377	4.07469e-06	4.07469e-06	4.07469e-06
LPC(14:0e)	LPC	M+H	454.329	2.54673	C22 H49 O6 N1 P1	0.22726	14169.2	3431.5	60990.1	12108.1	0.23232	-2.1058	0.000939106	0.00397777	17622.6	14259.4	9498.56	17240.2	16366.1	14816.5	15131.8	8418.15	81868.7	53840.3	69053.3	44983.5	51866	52778.3	67312	66218.6
LPC(14:1e)	LPC	M+H	452.314	2.43829	C22 H47 O6 N1 P1	0.17447	10847.2	6659.3	40809.7	11130.8	0.2658	-1.9116	0.000939106	0.00397777	7092.12	7352.31	8521.75	10831.9	7215.94	10223.2	26969.9	8570.7	46781	37139.5	63507.7	30534.2	46573	37716.2	33398.8	30827.2
LPC(15:0)	LPC	M+Na	504.306	2.53605	C23 H48 O7 N1 P1 Na1	0.0372442	220566	72388.2	231426	18798.5	0.95308	-0.069337	1	1	260218	169648	186053	293688	283470	150458	302430	118567	226727	248148	217211	252400	212586	217687	217215	259433
LPC(16:2e)	LPC	M+H	478.329	3.28132	C24 H49 O6 N1 P1	0.414974	801105	198862	1.04879e+06	157467	0.76384	-0.38866	0.0405689	0.0719971	839913	721177	664511	946447	1.1035e+06	639514	976786	516984	898428	1.01516e+06	1.12793e+06	1.32673e+06	838508	1.14015e+06	943320	1.10007e+06
LPC(18:3)	LPC	M+H	518.324	2.02375	C26 H49 O7 N1 P1	1.25204	881521	322925	2.47233e+06	700552	0.35655	-1.4878	0.000939106	0.00397777	1.25288e+06	852977	552082	1.05102e+06	1.33975e+06	614835	921024	467602	2.14165e+06	2.94787e+06	2.34633e+06	3.73196e+06	1.44673e+06	2.52859e+06	1.87358e+06	2.76193e+06
LPC(18:3e)	LPC	M+H	504.345	2.92412	C26 H51 O6 N1 P1	0.534343	159706	66291.1	425393	56037.7	0.37543	-1.4134	0.000939106	0.00397777	198860	151964	91275.3	186094	264942	122270	200689	61553.9	407797	413246	548890	449006	369477	392968	434507	387256
LPC(18:4)	LPC	M+H	516.308	1.73461	C26 H47 O7 N1 P1	0.130295	14025.8	4779.92	32878.2	10831.8	0.4266	-1.2291	0.00538494	0.0143212	16509.1	14180.5	10162.8	18360.5	19223.7	9535.01	17842.8	6391.92	12784.5	31897.9	36467.8	48000.4	22191.3	38617.6	35775.7	37290.7
LPC(19:1)	LPC	M+H	536.371	4.26114	C27 H55 O7 N1 P1	0.509827	268619	121799	536671	62900.3	0.50053	-0.99848	0.000939106	0.00397777	396702	220409	181823	325753	377451	155707	401534	89574.2	598849	487729	566383	626221	469475	509719	460248	574744
LPC(20:0)	LPC	M+H	552.402	6.72745	C28 H59 O7 N1 P1	0.278019	27017.7	11751.6	96349.8	12007.9	0.28041	-1.8344	0.000939106	0.00397777	33741.5	25060.8	19060	36779.1	32493.7	14185.3	44204.5	10616.3	101264	82178.4	109778	108890	81981.5	82994.4	101042	102670
LPC(20:0e)	LPC	M+H	538.423	8.04535	C28 H61 O6 N1 P1	0.132472	48864.9	8067.44	70377.5	14668.5	0.69433	-0.52632	0.00538494	0.0143212	50104.4	48885	36743.2	58999.7	53827.5	38481.6	57089.6	46788	72517.2	62187.3	94903.2	81640.2	55306.4	57877.1	56637.4	81951.4
LPC(20:1)	LPC	M+H	550.387	5.18452	C28 H57 O7 N1 P1	2.53717	3.9613e+06	1.37066e+06	1.01753e+07	2.05856e+06	0.38931	-1.361	0.000939106	0.00397777	4.69615e+06	3.39572e+06	2.99707e+06	5.46649e+06	5.11081e+06	3.02088e+06	5.29992e+06	1.7034e+06	9.56168e+06	8.35002e+06	1.34112e+07	1.17808e+07	7.45504e+06	9.81557e+06	8.90967e+06	1.21184e+07
LPC(20:1e)	LPC	M+H	536.407	7.84358	C28 H59 O6 N1 P1	0.0921369	17827.5	6205.28	28860.1	7276.62	0.61772	-0.69497	0.0100817	0.023429	20172.9	18654.8	11101.1	21536.9	21812.4	13558.4	27117.8	8665.89	26603.2	27165.6	36707.7	40154.8	18667.4	26108.9	22280.4	33192.7
LPC(20:2)	LPC	M+H	548.371	3.49344	C28 H55 O7 N1 P1	1.09173	3.29797e+06	1.03843e+06	1.86297e+06	287935	1.7703	0.82398	0.018129	0.0375566	4.34639e+06	3.40414e+06	2.45616e+06	3.546e+06	4.48323e+06	2.6841e+06	4.00569e+06	1.45809e+06	1.94562e+06	1.46311e+06	1.78343e+06	1.81865e+06	1.78668e+06	1.78499e+06	2.48944e+06	1.83182e+06
LPC(20:2e)	LPC	M+H	534.392	5.83874	C28 H57 O6 N1 P1	0.0870105	12150.5	6382.42	22007.3	5720.9	0.55211	-0.85696	0.0100817	0.023429	12656.8	10169.9	5202.25	16341.3	15656.1	8867.8	23747.3	4562.71	22189.4	19293.5	32493.7	27209	14950.5	18246	17838.1	23838.3
LPC(20:3e)	LPC	M+Na	554.358	3.11773	C28 H54 O6 N1 P1 Na1	0.106046	20105.9	9268.13	6778.26	2827.84	2.9662	1.5686	0.00135938	0.00497765	19430.7	18241.8	15239.4	18194.5	37130.8	13653.8	30381.3	8575.18	6724.96	4944.92	7449.15	8124.99	12473	2764.16	5585.49	6159.4
LPC(20:4)	LPC	M+Na	566.322	2.28209	C28 H50 O7 N1 P1 Na1	0.572176	1.10345e+06	706882	548447	132779	2.012	1.0086	0.0520296	0.0879514	399816	1.3262e+06	2.61104e+06	959997	975098	521647	636303	1.3975e+06	568926	781882	534029	506474	331452	630295	443772	590745
LPC(20:4e)	LPC	M+H	530.361	5.676	C28 H53 O6 N1 P1	0.13714	88361.1	51348.3	125804	30239.3	0.70237	-0.5097	0.156254	0.220027	120930	70725.4	39057.8	119784	109063	46779.4	175191	25357.5	127564	109953	181420	158678	99041.9	98987.4	102733	128056
LPC(21:0)	LPC	M+H	566.418	8.128	C29 H61 O7 N1 P1	0.197043	9747.06	4419.92	44769.4	7824.18	0.21772	-2.1995	0.000939106	0.00397777	10868.2	8092.66	6770.79	11997	15519.1	7408.07	14892.8	2427.93	48318.4	40110	54511.5	49571.5	36679.6	37572.1	36827.8	54564.2
LPC(22:0)	LPC	M+H	580.434	8.93831	C30 H63 O7 N1 P1	0.383527	119263	21641	254585	34730.2	0.46846	-1.094	0.000939106	0.00397777	130413	123038	106363	129538	141996	94931.7	143080	84741.7	242557	231185	303977	292673	208320	232339	239469	286162
LPC(22:2)	LPC	M+H	576.402	5.37581	C30 H59 O7 N1 P1	0.179773	58479.9	24917.4	21041.4	7166.38	2.7793	1.4747	0.0027616	0.00834568	76850.2	49279.5	35148.9	81868.1	85811.8	39017.1	77866.8	21997.2	29553.8	24214.6	19974.6	30658.7	17233.7	8646.58	17144	20904.9
LPC(22:3)	LPC	M+H	574.387	4.23369	C30 H57 O7 N1 P1	0.333923	297604	140466	145351	29534.4	2.0475	1.0338	0.0405689	0.0719971	414627	257397	176682	388178	403293	161050	476937	102668	180079	131038	123088	135998	195075	141793	150404	105335
LPC(22:6)	LPC	M+Na	590.322	2.13303	C30 H50 O7 N1 P1 Na1	0.294913	1.78943e+06	470504	2.02076e+06	211025	0.88552	-0.1754	0.156254	0.220027	1.1933e+06	2.0682e+06	2.70649e+06	1.82508e+06	1.89136e+06	1.43977e+06	1.4133e+06	1.77795e+06	1.86593e+06	2.40817e+06	2.05683e+06	1.9436e+06	1.67978e+06	2.13082e+06	2.06548e+06	2.01544e+06
LPC(23:0)	LPC	M+H	594.449	9.77336	C31 H65 O7 N1 P1	0.171223	16735.3	3587.47	43814.9	7622.51	0.38195	-1.3885	0.000939106	0.00397777	17490.6	15641.1	13621.3	17646.5	20651.2	14000.3	22614.5	12217	47420.4	39992.3	57262.7	44765.8	36658.2	32659.2	43315.2	48445.4
LPC(23:1)	LPC	M+H	592.434	8.1387	C31 H63 O7 N1 P1	0.0975436	5462.31	2047.83	14461.4	2503.49	0.37772	-1.4046	0.000939106	0.00397777	7637.37	5296.89	3862.37	6199	6511.77	3400.2	8235.52	2555.38	16658.4	13884.7	17619.9	16996.8	11299.1	11263.2	13083	14885.8
LPC(24:1)	LPC	M+H	606.449	8.92601	C32 H65 O7 N1 P1	0.350317	57833.9	11288.7	166540	19539.7	0.34727	-1.5259	0.000939106	0.00397777	61430.3	62031.5	54728.7	66737.1	67522.3	46162.1	67442.3	36617	165159	152599	190304	191008	135777	155084	161395	180992
LPC(24:2)	LPC	M+H	604.434	7.61123	C32 H63 O7 N1 P1	0.0910801	11401.9	2321.66	20347.3	4664.51	0.56037	-0.83556	0.00135938	0.00497765	10980.8	13297.9	11731.2	11599.4	14630	9037.14	12586.2	7352.76	21351.9	21214.5	20157.9	30252.7	14486.6	16637.8	18278.7	20397.9
LPC(26:1)	LPC	M+H	634.481	10.531	C34 H69 O7 N1 P1	0.0974275	6660.7	2289.64	17144.3	6078.95	0.38851	-1.364	0.00538494	0.0143212	5900.34	3561.61	9651.15	4809.91	10082.1	5243.57	7315.05	6721.85	24142.8	20686.6	20777.9	19333.8	6857.15	9104.5	19964.3	16287
LPC(28:0)	LPC	M+H	664.528	11.9753	C36 H75 O7 N1 P1	0.162953	55092.9	13191	101355	60753.1	0.54356	-0.87948	0.103562	0.156612	48022.3	40531.9	48706.1	78257.9	54130.2	43404.1	70471.9	57218.7	197431	52679.9	181166	36892.9	94535.6	62273.4	124521	61342.3
LPC(32:0)	LPC	M+Na	742.572	14.8636	C40 H82 O7 N1 P1 Na1	0.557726	58314.9	11806.9	327826	32575	0.17788	-2.491	0.000939106	0.00397777	33781.6	74183.6	67841	58580.1	54269.2	60367.4	61022.3	56473.9	312143	347292	314090	372070	353691	329897	264717	328706
LPC(34:0)	LPC	M+Na	770.603	16.184	C42 H86 O7 N1 P1 Na1	0.461288	323809	49816.5	539112	90548.6	0.60063	-0.73544	0.000939106	0.00397777	277406	355414	263510	364483	400364	277768	347458	304071	524720	469960	714775	614663	502707	482931	436231	566909
LPC(36:0)	LPC	M+Na	798.635	17.3026	C44 H90 O7 N1 P1 Na1	0.216078	134568	24705.7	189873	31670.3	0.70873	-0.4967	0.00740553	0.0183503	132667	138994	102117	171352	162751	103366	138485	126814	155606	156488	237893	221305	161492	185273	186548	214382
LPE(16:0)	LPE	M+Na	476.275	3.45046	C21 H44 O7 N1 P1 Na1	0.0431425	130589	10651.6	136581	12543.7	0.95613	-0.064717	0.270149	0.348585	130985	135654	114629	147757	129103	138492	118187	129908	139526	114027	143636	131214	130284	145517	132619	155823
LPE(16:1e)	LPE	M+Na	460.28	4.03077	C21 H44 O6 N1 P1 Na1	0.0823887	221560	42032.8	202849	10818.5	1.0922	0.1273	0.372029	0.452003	249530	222929	170481	270518	262604	189469	243531	163423	210821	181708	206121	201198	216124	199342	196482	210993
LPE(17:0)	LPE	M+Na	490.29	4.27947	C22 H46 O7 N1 P1 Na1	0.136776	17190.3	4936.56	35301.7	5383.41	0.48695	-1.0381	0.000939106	0.00397777	22227.8	13289.8	14968.7	21312.5	19919.8	13889.4	22540.7	9373.82	31841.8	34756.5	34893.5	39013	29464.6	34986.7	31015.3	46442.4
LPE(18:0)	LPE	M+Na	504.306	5.26767	C23 H48 O7 N1 P1 Na1	0.121378	1.48116e+06	286602	1.55308e+06	106875	0.95369	-0.068401	0.792896	0.837939	1.58038e+06	1.54688e+06	1.27648e+06	1.61252e+06	1.76392e+06	1.30527e+06	1.81268e+06	951182	1.52184e+06	1.3422e+06	1.55371e+06	1.5717e+06	1.63867e+06	1.4897e+06	1.61672e+06	1.69009e+06
LPE(18:1e)	LPE	M+Na	488.311	6.05456	C23 H48 O6 N1 P1 Na1	0.181895	508063	184319	421585	42044.5	1.2051	0.26919	0.563524	0.634285	667671	450669	336820	646882	609979	369063	746865	236554	453825	360022	481930	440810	385475	398665	397114	454834
LPE(18:2e)	LPE	M+Na	486.295	4.26455	C23 H46 O6 N1 P1 Na1	0.0307278	216154	63908.1	224569	16742.9	0.96253	-0.055099	0.958122	0.972038	270212	185291	156122	243462	256493	171588	314293	131769	235129	208945	221684	209790	256075	231653	226915	206360
LPE(18:3)	LPE	M+H	476.277	2.09059	C23 H43 O7 N1 P1	0.138618	9988.2	6040.24	34261.3	19058.2	0.29153	-1.7783	0.00538494	0.0143212	20894.7	6653.51	4768.28	9738.17	17273.1	3648.71	8232.74	8696.35	20168.6	35293.9	25939	63581.6	16446.1	51005.5	10921.1	50734.5
LPE(20:0)	LPE	M+H	510.355	7.48317	C25 H53 O7 N1 P1	0.402143	95483.5	38496.2	249689	43170	0.38241	-1.3868	0.000939106	0.00397777	137906	81138.6	63077.9	121316	119716	65391.7	137839	37482.6	258895	193951	296262	274321	187968	242668	238195	305255
LPE(20:1e)	LPE	M+Na	516.342	8.15073	C25 H52 O6 N1 P1 Na1	0.0226734	61950.2	22602.6	65981.2	16195.2	0.93891	-0.090946	0.792896	0.837939	82431.1	53996.1	35774.1	84597.7	67708.7	47879.3	90450.9	32763.5	64928.6	57272	84051	88784.8	41957	64828.1	50435.7	75592.2
LPE(20:2e)	LPE	M+Na	514.327	6.223	C25 H50 O6 N1 P1 Na1	0.0247404	17066.2	8376.07	19605	3607.02	0.8705	-0.20008	0.103562	0.156612	13383.7	14678.3	8919.78	22326.6	35327.7	13027.5	17092.8	11773.1	19319.1	15629.1	26488.3	22353.8	16652.9	17406.3	17668.2	21322.3
LPE(20:5)	LPE	M+H	500.277	1.90439	C25 H43 O7 N1 P1	0.176067	13948.5	3705.16	42612.9	8184.28	0.32733	-1.6112	0.000939106	0.00397777	16694.6	10814	16126.6	18016.3	15877.2	10918.1	15646.4	7494.5	47296.5	40137.2	38966.5	51936.2	31937	43680.4	32891.7	54057.3
LPE(22:0)	LPE	M+H	538.387	9.211	C27 H57 O7 N1 P1	0.0838409	6189.88	2171	13284.5	2584.93	0.46595	-1.1018	0.000939106	0.00397777	8286.26	6198.43	4740.55	7961.43	7954.37	4171.35	7731.03	2475.58	14954.5	9818.46	15435.3	11322.7	11122.4	12236.2	13943.6	17442.4
LPE(22:3)	LPE	M+H	532.34	4.45029	C27 H51 O7 N1 P1	0.0544802	8934.95	3183.35	5079.62	1006.99	1.759	0.81474	0.0239487	0.0468347	13345.4	9091.55	7088.47	10950.9	11655.7	5283.61	9861.16	4202.79	5879.73	4696.7	4836.7	3382.26	5119.04	6578.13	5821.88	4322.49
LPE(22:6)	LPE	M+Na	548.275	2.24022	C27 H44 O7 N1 P1 Na1	0.126604	176294	32376.9	208001	38186.1	0.84757	-0.2386	0.0831229	0.13017	157384	191433	209536	192016	192116	130155	130717	206994	230464	185370	158438	223905	219332	269179	158149	219167
LPE(24:1)	LPE	M+H	564.402	9.19044	C29 H59 O7 N1 P1	0.088725	4136.35	1534.91	11419	1699.34	0.36224	-1.465	0.000939106	0.00397777	5833.29	3469.22	3421.61	5730.03	4653.12	3024.16	5448.18	1511.22	12728.1	9302.56	12290	11796.5	9052.52	10989.1	11086.3	14106.8
LPG(18:2)	LPG	M+Na	531.269	2.14358	C24 H45 O9 N0 P1 Na1	0.0176465	7893.37	7787.63	6114.88	4284.05	1.2908	0.36832	0.713191	0.769972	10.3068	12049.4	8110.05	18277.1	19015.7	3163.55	0.149652	2520.7	6409.52	6714.91	7379.52	10720.6	6023.14	4.07469e-06	19.4464	11651.9
LPG(20:3)	LPG	M+Na	557.285	1.87268	C26 H47 O9 N0 P1 Na1	0.0720493	21445	8141.52	29588.8	4864.3	0.72477	-0.46441	0.0313241	0.0589837	20789.5	17893	18811.1	30760.5	24794.9	27875.5	26031.3	4603.94	30440.3	25229.2	30152.1	22003.5	29115.9	32160.3	38582.8	29026.6
LPI(18:0)	LPI	M+H	601.335	3.90499	C27 H54 O12 N0 P1	0.0503846	3328.64	2311.92	7007.26	3029.36	0.47503	-1.0739	0.0239487	0.0468347	2761	8207.53	3405.09	1571.95	4964.82	2782.84	1853.98	1081.96	8484.89	8592.06	11092.6	7643.53	6568.19	3307.2	8495.63	1873.96
LPS(20:3)	LPS	M+Na	570.28	1.775	C26 H46 O9 N1 P1 Na1	0.0520614	6286	2484.87	9786.58	1682.94	0.64231	-0.63866	0.0100817	0.023429	5588.52	11238.5	7166.57	7249.63	4882.92	3160.34	6829.81	4171.71	7468	10655.5	11190.6	8661.54	10373.2	7809.96	12277	9856.74
LPS(22:6)	LPS	M+H	570.283	1.787	C28 H45 O9 N1 P1	0.0520614	6286	2484.87	9786.58	1682.94	0.64231	-0.63866	0.0100817	0.023429	5588.52	11238.5	7166.57	7249.63	4882.92	3160.34	6829.81	4171.71	7468	10655.5	11190.6	8661.54	10373.2	7809.96	12277	9856.74
MG(22:6)	MG	M+H	403.284	3.48295	C25 H39 O4	0.0453321	5521.26	5303.16	10185.4	6871.32	0.54208	-0.88344	0.156254	0.220027	744.704	3270.67	3803.21	5448.65	4405.2	8756.61	750.2	16990.8	6359.17	16641.1	7141.16	1091.85	3787.37	21256.9	10728.3	14477.5
MG(36:0)	MG	M+Na	633.579	16.901	C39 H78 O4 Na1	0.066523	114251	31506.8	128638	24542.8	0.88816	-0.17111	0.372029	0.452003	151086	113730	85579.8	145562	125958	77319.4	140509	74266.5	134816	99388.4	117165	148045	112131	157922	100822	158815
MG(38:1)	MG	M+H	637.613	18.97	C41 H81 O4	0.191481	87834.3	42129.5	39666.1	5963.96	2.2143	1.1469	0.00538494	0.0143212	95013.5	81134.6	48411.1	169949	64197.6	85507.1	119965	38495.9	36769.6	31928.8	39756.1	35405.3	40800.2	36454.1	46050.6	50163.6
MePC(14:0e)	MePC	M+Na	504.306	2.84007	C23 H48 O7 N1 P1 Na1	0.0517185	110955	36823.1	99889.6	14681.8	1.1108	0.15157	0.318425	0.399191	148980	106824	101054	141361	137041	74546.6	133800	44036.4	120111	75461.2	94894.2	99371.1	93375.1	90097.3	112216	113591
MePC(14:2)	MePC	M+NH4	509.299	3.731	C23 H46 O8 N2 P1	0.022222	5116.02	7762.99	8029.03	12889.9	0.63719	-0.6502	0.493563	0.568203	1014.98	8608.06	4188.84	4.07469e-06	4.07469e-06	4313.8	4.07469e-06	22802.5	11411.2	613.353	4701.08	1645.95	38740.3	2289.57	4096.43	734.297
MePC(15:0)	MePC	M+NH4	527.346	4.722	C24 H52 O8 N2 P1	0.00465518	3690.39	2975.1	3339.32	4051.12	1.1051	0.14422	0.494837	0.568203	3509.6	2726.45	2382.01	2703.63	10532.7	4710.78	2058.45	899.457	2334.14	4.07469e-06	1196.49	146.031	5053.65	876.542	12057	5050.7
MePC(16:0)	MePC	M+NH4	541.361	5.821	C25 H54 O8 N2 P1	0.0787512	16128.5	11809.8	35898.8	52423.4	0.44928	-1.1543	0.318425	0.399191	29875.5	33583	11327.6	8990.27	5999.98	7196.81	5390.59	26663.9	31441.8	8081.98	22148.2	8226.6	163904	13183.3	26756.3	13448.2
MePC(16:0e)	MePC	M+Na	532.337	4.05876	C25 H52 O7 N1 P1 Na1	0.630792	345291	162308	770233	178259	0.44829	-1.1575	0.000939106	0.00397777	506502	292144	212058	458551	485363	210110	502265	95332.9	693971	861052	933863	1.01912e+06	591555	616936	549907	895459
MePC(16:2)	MePC	M+NH4	537.33	4.649	C25 H50 O8 N2 P1	0.162296	12685.8	4559.43	44413.9	23408.7	0.28563	-1.8078	0.00387604	0.0109285	14434.7	10374.6	17367.3	13481.5	6736.53	8886.04	9952.23	20253.1	31523.7	25350	39639.9	11268.3	77941.3	37997.5	73046.8	58543.4
MePC(16:3)	MePC	M+NH4	535.314	4.09381	C25 H48 O8 N2 P1	0.0615291	13358	8679.27	25407.2	31520.3	0.52576	-0.92753	0.494837	0.568203	23003.7	16156.7	9643.34	12673.3	4386.91	4142.94	8545.43	28311.6	22298.4	5353.09	18400.3	8834.78	101646	7829.25	23100.9	15794.2
MePC(16:4)	MePC	M+NH4	533.299	3.083	C25 H46 O8 N2 P1	0.0996745	24760.1	16624.2	8862.5	9276.46	2.7938	1.4822	0.0405689	0.0719971	35792.3	41590.7	29027.2	6806.71	7347.13	10299.1	49735.2	17482.8	27396.7	2323.97	14298.9	4.07469e-06	13397.4	8889.05	1515.62	3078.24
MePC(17:0e)	MePC	M+NH4	541.398	6.078	C26 H58 O7 N2 P1	0.284689	11764.6	6027.11	84553.5	16825.6	0.13914	-2.8454	0.000939106	0.00397777	18492.2	9857.65	7882.17	14165.2	13963.9	5428.33	20507.8	3819.85	90738.2	87475	103398	96220.9	60971.2	68723.3	66605	102296
MePC(17:1e)	MePC	M+Na	544.337	2.436	C26 H52 O7 N1 P1 Na1	2.35676	2.39045e+07	2.04231e+07	1.20051e+07	3.31439e+06	1.9912	0.99364	0.103562	0.156612	2.55071e+07	1.43007e+07	8.99627e+06	2.18451e+07	2.50087e+07	7.08798e+07	2.02067e+07	4.49185e+06	8.17932e+06	1.01269e+07	1.3659e+07	8.5897e+06	1.77674e+07	1.08102e+07	1.51126e+07	1.17956e+07
MePC(17:3)	MePC	M+NH4	549.33	4.6696	C26 H50 O8 N2 P1	0.0566842	12977.8	9128.74	21221.6	15106.5	0.61154	-0.70949	0.189263	0.257782	13409.2	10656.7	7947.86	11146.7	34049.1	11043.7	12654.6	2914.72	19300.3	3139.57	19348.1	5816.88	34694	13111.4	48784.7	25578
MePC(18:1)	MePC	M+NH4	567.377	8.27962	C27 H56 O8 N2 P1	0.0374404	38614.7	13133.1	33601.2	8060.44	1.1492	0.20064	0.713191	0.769972	34036	59858	39506.5	25306.2	31437.6	35519.5	26168	57086.1	26520	24321.1	22872.8	42118.4	40887.1	40467.2	32579.9	39043.5
MePC(18:2)	MePC	M+NH4	565.361	4.346	C27 H54 O8 N2 P1	0.000246104	557.549	647.983	549.716	619.491	1.0142	0.020412	0.713191	0.769972	127.679	1878.09	620.938	54.4026	75.0378	717.675	4.07469e-06	986.569	1737.67	77.9446	962.863	158.688	162.981	1023.67	53.1032	220.813
MePC(18:2e)	MePC	M+Na	556.337	2.28228	C27 H52 O7 N1 P1 Na1	0.0404422	7815.29	12014.5	2755.19	5741.44	2.8366	1.5041	0.365422	0.452003	4.07469e-06	4.07469e-06	4.07469e-06	3711.78	11402.2	12945.4	34463	4.07469e-06	4.07469e-06	4.07469e-06	4.07469e-06	6093.14	4.07469e-06	4.07469e-06	4.07469e-06	15948.4
MePC(18:3)	MePC	M+NH4	563.346	5.826	C27 H52 O8 N2 P1	0.119422	31047.4	22231.3	72842.7	101281	0.42623	-1.2303	0.227147	0.301073	59086.2	64320.8	22255.7	18721.7	13741.6	13013.9	9903.06	47336.4	66474.7	17161.6	46350.2	19205.7	319725	30458.1	55762.7	27603.7
MePC(18:3e)	MePC	M+Na	554.322	1.81326	C27 H50 O7 N1 P1 Na1	0.102198	6051.63	2319.16	16562.7	4373.32	0.36538	-1.4525	0.000939106	0.00397777	6904.76	6547.54	3406.47	8570.92	6953.2	4350.56	8965.15	2714.41	18468	12942.1	17896.9	11826	19366	12693.3	24703.1	14605.9
MePC(18:5e)	MePC	M+Na	550.29	2.879	C27 H46 O7 N1 P1 Na1	0.318261	220425	44183.3	118687	17656.7	1.8572	0.89313	0.000939106	0.00397777	227019	234622	170269	235165	258468	191015	288063	158780	138065	87278.7	124704	110280	122903	110746	143056	112461
MePC(19:0e)	MePC	M+Na	574.384	4.552	C28 H58 O7 N1 P1 Na1	0.119239	49367.1	21645.7	27901.6	9525	1.7693	0.8232	0.0660819	0.107911	76868.8	39741.3	28614.4	71141	64445.8	36034.1	60350.6	17740.9	27590.6	41848.4	39790.2	22391.5	31816.2	20899.5	24967.5	13908.6
MePC(19:1)	MePC	M+NH4	581.393	8.856	C28 H58 O8 N2 P1	0.00904813	7287.1	4313.55	8035.8	4217.87	0.90683	-0.1411	0.713191	0.769972	9216.24	9120.38	3718.7	6372.45	15783.7	3879.83	7953.29	2252.22	7152.06	1857.49	5944.08	4671.26	10957.4	9604.95	15701	8398.07
MePC(19:2)	MePC	M+NH4	579.377	7.242	C28 H56 O8 N2 P1	0.0225716	15981.4	13362.1	12911.1	9176.62	1.2378	0.30778	0.713191	0.769972	23925.7	12064.5	8582.87	12899.2	44246.7	6283.37	18314.4	1534.66	10886.4	412.887	6456.76	6088.08	20808.6	10707.5	27797.4	20131
MePC(19:2e)	MePC	M+Na	570.353	3.79532	C28 H54 O7 N1 P1 Na1	0.0215846	402783	236049	390977	119538	1.0302	0.042918	0.563524	0.634285	566240	429927	156389	540970	646148	155463	645789	81337.1	477812	132822	464058	437473	424143	319695	499625	372191
MePC(19:3)	MePC	M+Na	582.317	1.662	C28 H50 O8 N1 P1 Na1	0.0931157	5056.83	5068.74	16451.8	8703.82	0.30737	-1.7019	0.0100817	0.023429	6075.07	6162.85	3062.83	5614.69	2590.85	4.07469e-06	16164.7	783.639	11549	3870.09	17111.8	11126.9	26242.6	10103.3	23802.3	27808.5
MePC(19:3e)	MePC	M+Na	568.337	2.12665	C28 H52 O7 N1 P1 Na1	7.48333	1.50153e+08	4.29044e+07	2.18282e+08	2.97894e+07	0.68789	-0.53976	0.00538494	0.0143212	1.52468e+08	1.60627e+08	8.58019e+07	1.90577e+08	2.04944e+08	1.4424e+08	1.71569e+08	9.09955e+07	1.70566e+08	2.24685e+08	2.61305e+08	1.98117e+08	2.10536e+08	2.33513e+08	2.49107e+08	1.98426e+08
MePC(19:4e)	MePC	M+Na	566.322	1.77215	C28 H50 O7 N1 P1 Na1	0.692416	1.27813e+06	435793	685923	169582	1.8634	0.89791	0.0135873	0.0294907	1.39747e+06	1.42509e+06	632936	1.70617e+06	1.42005e+06	1.20555e+06	1.79405e+06	643709	720928	565785	736810	506156	1.02008e+06	581698	796487	559444
MePC(20:1)	MePC	M+NH4	595.408	9.89767	C29 H60 O8 N2 P1	0.138281	107078	53276.4	68654.1	31417.2	1.5597	0.64124	0.103562	0.156612	133141	199758	55634.8	127104	127498	42485.5	117375	53626.3	53022.8	19698.5	53913.9	43850.9	86348.2	78375.5	113556	100467
MePC(20:2)	MePC	M+Na	598.348	2.6091	C29 H54 O8 N1 P1 Na1	0.173998	101174	16913.3	139996	28171.7	0.72269	-0.46855	0.00538494	0.0143212	88073.6	111104	101931	112944	107388	99360.3	121283	67309.1	170708	124912	135173	110836	114844	169881	177570	116045
MePC(20:2e)	MePC	M+NH4	579.413	3.67687	C29 H60 O7 N2 P1	0.0083183	33286.7	9280.26	34222.5	6228.83	0.97266	-0.039997	0.958122	0.972038	36760.2	24618.7	35324	45312.8	38700.2	27592.3	40574.6	17411	35634.3	36094.9	35731.6	20793	40388.9	32802.5	31933.1	40401.4
MePC(20:3)	MePC	M+Na	596.332	2.29744	C29 H52 O8 N1 P1 Na1	0.843335	598256	121198	1.3095e+06	304098	0.45686	-1.1302	0.000939106	0.00397777	493772	565337	447600	577650	640845	566971	848661	645214	1.39156e+06	1.27806e+06	1.01238e+06	1.58901e+06	897894	1.61132e+06	1.67173e+06	1.02406e+06
MePC(21:2e)	MePC	M+Na	598.384	3.40661	C30 H58 O7 N1 P1 Na1	0.221123	62415.5	25124.1	116223	21459.1	0.53703	-0.89693	0.00135938	0.00497765	78558	70899	56182.6	47559.4	86666.1	35843.2	97385.3	26230.3	111259	98881.2	115387	117241	93848.2	107570	164109	121493
MePC(21:3)	MePC	M+Na	610.348	2.43507	C30 H54 O8 N1 P1 Na1	0.234508	263224	107244	375025	147703	0.70188	-0.5107	0.0831229	0.13017	208986	208693	218446	440417	308349	143151	397091	180658	569993	213437	566721	287376	266997	265557	508068	322054
MePC(21:3e)	MePC	M+Na	596.369	2.80046	C30 H56 O7 N1 P1 Na1	0.479212	962186	452612	1.36117e+06	283759	0.70688	-0.50046	0.103562	0.156612	1.18261e+06	855686	604503	1.25674e+06	1.16889e+06	601573	1.7142e+06	313282	1.63985e+06	1.35118e+06	1.08679e+06	1.72042e+06	1.51936e+06	1.07877e+06	1.52076e+06	972210
MePC(21:4e)	MePC	M+Na	594.353	3.11368	C30 H54 O7 N1 P1 Na1	0.534173	531185	178194	220250	53988.1	2.4117	1.2701	0.0027616	0.00834568	532859	607474	324931	687683	757818	454938	637201	246577	249674	194532	208206	152197	311588	205616	272736	167449
MePC(22:2e)	MePC	M+NH4	607.445	5.45473	C31 H64 O7 N2 P1	0.19075	22597.6	11108.3	58224.3	10216.8	0.38811	-1.3655	0.000939106	0.00397777	36909.6	24110.9	12513.2	26461.6	20931.9	17194.4	37217.2	5442.24	55882.9	56577.9	68534.5	55721.2	38789.5	55414.7	62213.7	72660.5
MePC(22:3)	MePC	M+Na	624.364	2.79844	C31 H56 O8 N1 P1 Na1	0.102185	5345.39	4287.76	18127.5	8944.79	0.29488	-1.7618	0.00194753	0.00637467	4476.52	3326.04	3913.28	5386.02	4.07469e-06	3347.9	14450.9	7862.41	34868.6	16431.3	26247.9	14460.3	7985.52	15014.3	20728.7	9283.56
MePC(23:1e)	MePC	M+NH4	623.476	5.11172	C32 H68 O7 N2 P1	0.0294194	15552.5	12111.3	11795	7326.93	1.3186	0.39898	0.958122	0.972038	13283.7	7279.23	8965.22	37704.1	3850.47	23288.2	25554.8	4494.47	16787.7	9144.32	23842.7	14005.5	4.07469e-06	9341.94	15409.1	5828.48
MePC(23:5e)	MePC	M+Na	620.369	3.699	C32 H56 O7 N1 P1 Na1	0.0612432	14311.1	7344.78	8015.64	3295.04	1.7854	0.83625	0.127808	0.186204	14015.7	11902.2	10183.4	19394.1	24708.8	7411.32	22699.7	4173.67	10570.5	5116.79	8093.61	5405.25	12219.4	5078.31	12471.3	5169.96
MePC(24:1e)	MePC	M+NH4	637.492	3.12282	C33 H70 O7 N2 P1	0.359253	114713	37414.9	257805	81315.9	0.44496	-1.1683	0.00194753	0.00637467	136525	189819	88526.2	77655.8	114939	113474	121708	75053.4	316382	314854	366845	192778	290566	275591	151491	153932
MePC(26:0)	MePC	M+NH4	681.518	6.739	C35 H74 O8 N2 P1	0.0786606	15907	8985.22	6766.14	3787.08	2.351	1.2333	0.0405689	0.0719971	17109.2	16555.6	9702.09	24281	18091.6	10988.4	29839	689.187	4865.47	4054.25	5691.87	1695.34	11642.8	5138.11	12512.5	8528.83
MePC(27:0)	MePC	M+Na	700.489	11.106	C36 H72 O8 N1 P1 Na1	0.139727	22882.3	6691.21	4140.6	2831.43	5.5263	2.4663	0.000939106	0.00397777	26170.3	35288	18506.3	21871.4	20418.4	27516.7	13242.9	20044.2	4934.1	2435.48	2143.65	7293.27	4.07469e-06	4243.36	3363.16	8711.75
MePC(27:3)	MePC	M+NH4	689.486	5.693	C36 H70 O8 N2 P1	0.119111	40640.7	81049.8	3530.22	4880.04	11.512	3.5251	0.712989	0.769972	4.07469e-06	95611.9	1691.12	2707.22	4.07469e-06	760.095	650.003	223705	1859.68	15128.8	1744.39	4887.44	1297.83	2175.11	402.024	746.491
MePC(28:0)	MePC	M+NH4	709.549	6.9196	C37 H78 O8 N2 P1	0.00172076	10213.7	4115.51	10337.5	2003.52	0.98803	-0.017377	0.874826	0.905144	11016.4	8198.92	10210.8	15688.5	11609.5	9293.18	13757.1	1935.21	10235.6	11668.7	12305.1	10494	11054.5	11496.4	9578.86	5866.74
MePC(28:2e)	MePC	M+NH4	691.538	10.607	C37 H76 O7 N2 P1	0.013642	14400.8	2964.95	15417	3837.84	0.93409	-0.098369	0.792896	0.837939	11678.5	14577.7	11512.8	18760.8	16939.2	11106.8	17287.4	13343.5	10393.7	12187.7	15992.7	16709.5	17068.2	14042	13879.2	23062.8
MePC(28:3)	MePC	M+NH4	703.502	17.4825	C37 H72 O8 N2 P1	0.104228	21509.2	7459.16	9157.51	3413.43	2.3488	1.2319	0.00194753	0.00637467	31921.9	24124.8	23622.2	14535.2	17187.1	18321	11381.7	30979.9	7802.31	10917	5830.33	14089.5	11981.8	11347	4267.37	7024.69
MePC(28:7)	MePC	M+NH4	695.439	4.691	C37 H64 O8 N2 P1	0.0295299	6727.05	2381.3	8787.03	3232.97	0.76557	-0.3854	0.127808	0.186204	6567.27	8442.54	3381.23	8611.26	8643.63	4791.11	9387.55	3991.81	10641.7	7457.87	10612.2	3144.14	11583.4	4966.37	11670.2	10220.3
MePC(29:0)	MePC	M+Na	728.52	11.4358	C38 H76 O8 N1 P1 Na1	0.229685	121062	61820.6	50632.4	16366.6	2.391	1.2576	0.0405689	0.0719971	39385	74744.5	159866	112430	162342	182928	44881.6	191920	67957.9	55617.7	67233.6	46698	54960.3	26640.6	59518.9	26432.4
MePC(29:0e)	MePC	M+Na	714.541	11.4056	C38 H78 O7 N1 P1 Na1	0.200804	4.07469e-06	0	42202.6	22590.5	9.6551e-11	-33.27	0.000409933	0.00397777	4.07469e-06	4.07469e-06	4.07469e-06	4.07469e-06	4.07469e-06	4.07469e-06	4.07469e-06	4.07469e-06	76852.3	23555.9	77923.7	24872.6	37500.6	22961.8	37583.1	36370.5
MePC(29:1)	MePC	M+Na	726.504	9.78269	C38 H74 O8 N1 P1 Na1	0.060443	15142.3	2843.38	10410	2923.38	1.4546	0.54061	0.0239487	0.0468347	13992	14225.4	13409.7	18220.5	20759.5	12245.5	14213.4	14072.1	10020.4	8992.07	8795.97	5867.2	14871.2	10063.6	10466	14203.8
MePC(29:1e)	MePC	M+Na	712.525	10.8062	C38 H76 O7 N1 P1 Na1	0.202319	1559.68	1383.89	41054.6	15623.5	0.03799	-4.7182	0.000939106	0.00397777	2480.65	2868.77	0.00387959	3200.94	0.00509529	1450.37	0.052841	2476.66	50998	17383.3	61805	29505.6	41430.4	35690.2	60152.7	31471.4
MePC(29:6e)	MePC	M+Na	702.447	7.53128	C38 H66 O7 N1 P1 Na1	0.0540499	4326.77	1201.7	8021.93	2804.06	0.53937	-0.89066	0.00387604	0.0109285	5336.44	4629.29	2629.16	5824.47	4921.86	3484.06	4997.72	2791.15	7080.23	7061.33	7231.86	13871.4	5281.02	9563.55	5228.67	8857.38
MePC(30:0)	MePC	M+NH4	737.58	11.5452	C39 H82 O8 N2 P1	0.0616765	21514.9	4574.21	14180.4	10245.7	1.5172	0.60144	0.0660819	0.107911	25813.2	14455.3	23324.1	17009.5	22160.9	23262.5	27864.4	18229.7	9687.98	9143.89	17615	23002.5	0.0252938	8771.62	11953.7	33268.2
MePC(30:1)	MePC	M+Na	740.52	12.5049	C39 H76 O8 N1 P1 Na1	0.17274	76159.3	19519.5	134985	90414.6	0.56421	-0.8257	0.270149	0.348585	84675.7	70716.7	83464.9	83077.6	108240	64081.6	40290.2	74727.6	80724	137104	78480.8	314655	43973.8	214580	70497	139863
MePC(30:2)	MePC	M+NH4	733.549	6.95	C39 H78 O8 N2 P1	0.0107739	4451.28	2245.27	3841.88	1662.36	1.1586	0.21241	0.563524	0.634285	4749.91	3201.54	4678.3	5916.18	7017.74	3359.25	6599.98	87.3464	831.345	4276.29	3705.92	6638.14	3445.63	2927.1	4959.35	3951.25
MePC(30:3)	MePC	M+NH4	731.533	11.523	C39 H76 O8 N2 P1	0.94095	1.48604e+06	194932	2.61606e+06	928154	0.56804	-0.81593	0.000939106	0.00397777	1.64241e+06	1.37169e+06	1.35239e+06	1.53364e+06	1.7511e+06	1.12809e+06	1.53744e+06	1.57153e+06	1.88241e+06	2.4654e+06	1.87773e+06	3.92287e+06	1.77906e+06	3.56821e+06	1.82502e+06	3.60781e+06
MePC(30:3e)	MePC	M+NH4	717.554	10.7898	C39 H78 O7 N2 P1	0.0986109	49402.7	24332	31714.9	6316.3	1.5577	0.63943	0.189263	0.257782	23895.6	38439.3	87875.1	44796.4	28530.8	66219.5	28946.3	76518.4	32363.9	46025.9	27187.2	27485.5	31173	26995.4	33758.6	28729.8
MePC(30:4e)	MePC	M+Na	720.494	11.8058	C39 H72 O7 N1 P1 Na1	0.457457	279663	37411.1	486018	81833.8	0.57542	-0.79732	0.000939106	0.00397777	244263	317255	318955	295847	217581	309059	279306	255034	609160	473597	522385	513182	353668	400001	465586	550561
MePC(31:0)	MePC	M+Na	756.551	12.512	C40 H80 O8 N1 P1 Na1	0.404377	731436	144286	959981	171019	0.76193	-0.39227	0.0239487	0.0468347	927072	775786	576086	754384	823217	521204	855503	618234	994756	997355	957837	1.25657e+06	737393	1.00491e+06	715939	1.01509e+06
MePC(31:0e)	MePC	M+Na	742.572	13.5763	C40 H82 O7 N1 P1 Na1	2.06121	2.47302e+06	482993	6.58442e+06	1.58284e+06	0.37559	-1.4128	0.000939106	0.00397777	2.2285e+06	2.33212e+06	2.23729e+06	2.43619e+06	3.02601e+06	1.75014e+06	3.29029e+06	2.48362e+06	5.57278e+06	5.78267e+06	6.34522e+06	9.08641e+06	4.80397e+06	8.31296e+06	5.09776e+06	7.67354e+06
MePC(31:1)	MePC	M+Na	754.536	10.6598	C40 H78 O8 N1 P1 Na1	0.850363	128294	35789.5	848882	325336	0.15113	-2.7261	0.000939106	0.00397777	143067	117830	76591.9	133585	159836	74889.8	165003	155551	547189	858010	801660	1.28504e+06	527203	876141	539551	1.35626e+06
MePC(31:1e)	MePC	M+Na	740.556	11.496	C40 H80 O7 N1 P1 Na1	0.140691	4558.42	4621.09	27789.5	15889.2	0.16403	-2.6079	0.000906857	0.00397777	4.07469e-06	5055.17	5972.93	11001.3	11041.9	3396.1	4.07469e-06	4.07469e-06	62468.8	11584.8	33015.7	26560.5	27728.1	19615.2	13424	27918.6
MePC(31:2)	MePC	M+Na	752.52	10.02	C40 H76 O8 N1 P1 Na1	0.117993	91972.3	38971.6	123243	42263.5	0.74627	-0.42224	0.227147	0.301073	71468.3	117984	80238.3	125348	154269	37706.2	94855.3	53909.1	144380	74873.7	94808.4	143460	146996	199635	92810	88982.8
MePC(31:2e)	MePC	M+Na	738.541	10.9962	C40 H78 O7 N1 P1 Na1	0.239812	2023.86	1725.73	55415.9	17101	0.036521	-4.7751	0.000939106	0.00397777	24.7016	3594.8	2063.52	3423.36	54.4706	4.07469e-06	3534.64	3495.38	84271.9	50795.3	63702.9	72460	36411.4	46182.6	35806.1	53697.3
MePC(31:3)	MePC	M+NH4	745.549	14.737	C40 H78 O8 N2 P1	1.35136	2.55994e+06	1.047e+06	5.25299e+06	2.66693e+06	0.48733	-1.037	0.0100817	0.023429	4.19673e+06	2.30468e+06	938414	2.49704e+06	3.71072e+06	1.57918e+06	2.64692e+06	2.60585e+06	3.8349e+06	4.36806e+06	3.36025e+06	1.0299e+07	2.74177e+06	6.33694e+06	3.27204e+06	7.81094e+06
MePC(31:4)	MePC	M+Na	748.489	8.84611	C40 H72 O8 N1 P1 Na1	0.0509286	18268.2	6014.76	13596.7	2606.7	1.3436	0.42608	0.156254	0.220027	12649.4	18365.3	11233.4	25958.2	24938	18195.1	11613.1	23193	13230.9	9846.68	13007.5	10615.2	15026.2	13395.4	17598	16053.8
MePC(31:4e)	MePC	M+Na	734.51	12.519	C40 H74 O7 N1 P1 Na1	0.766068	258912	38008.3	788115	129932	0.32852	-1.6059	0.000939106	0.00397777	308608	233113	241946	263857	259441	205670	318035	240629	683318	801005	957501	879939	632319	658409	741194	951233
MePC(31:8e)	MePC	M+Na	726.447	7.179	C40 H66 O7 N1 P1 Na1	0.05654	16005.4	5668	10771.3	3121.04	1.4859	0.57137	0.0520296	0.0879514	20813.3	18217.4	14021.6	19635.1	20103	11830	19082.6	4340.47	12802.9	5485.12	14429.8	9401.71	14828.4	8902.42	10438.6	9881.35
MePC(32:0)	MePC	M+Na	770.567	14.4773	C41 H82 O8 N1 P1 Na1	2.21824	1.64121e+07	927473	1.18635e+07	1.07906e+06	1.3834	0.46824	0.000939106	0.00397777	1.73929e+07	1.68243e+07	1.54628e+07	1.64874e+07	1.76179e+07	1.52867e+07	1.53767e+07	1.68483e+07	1.20556e+07	1.15416e+07	9.99631e+06	1.36336e+07	1.15771e+07	1.29313e+07	1.16712e+07	1.15011e+07
MePC(32:1)	MePC	M+NH4	763.596	15.377	C41 H84 O8 N2 P1	1.17621	2.40622e+07	3.38458e+06	2.14667e+07	1.807e+06	1.1209	0.16467	0.127808	0.186204	2.42326e+07	2.63493e+07	1.92657e+07	2.46952e+07	2.76902e+07	2.02725e+07	2.83316e+07	2.16606e+07	2.0019e+07	1.91597e+07	2.35917e+07	2.16647e+07	2.11764e+07	2.08926e+07	2.45939e+07	2.06355e+07
MePC(32:2)	MePC	M+NH4	761.58	12.9835	C41 H82 O8 N2 P1	1.79508	4.78094e+06	646790	8.19537e+06	1.781e+06	0.58337	-0.77752	0.000939106	0.00397777	5.14523e+06	5.27731e+06	3.71928e+06	4.94112e+06	5.48795e+06	3.88406e+06	5.07743e+06	4.71514e+06	6.44099e+06	8.33491e+06	7.85918e+06	1.18871e+07	6.59001e+06	8.77294e+06	6.79024e+06	8.88761e+06
MePC(32:2e)	MePC	M+Na	752.556	12.5822	C41 H80 O7 N1 P1 Na1	0.285247	92245.8	18715.3	176562	39578.4	0.52246	-0.93662	0.000939106	0.00397777	71154	118837	101272	109053	105576	69537	82142.6	80394.3	132524	198962	145653	256965	160046	151936	191466	174944
MePC(32:3)	MePC	M+Na	764.52	12.6198	C41 H76 O8 N1 P1 Na1	5.48739	8.10383e+07	7.21543e+06	1.10604e+08	1.0415e+07	0.73269	-0.44873	0.00135938	0.00497765	7.82108e+07	8.16155e+07	6.74055e+07	8.46541e+07	8.8167e+07	7.7474e+07	9.06713e+07	8.01079e+07	1.12126e+08	8.98768e+07	1.06877e+08	1.10252e+08	1.0717e+08	1.17638e+08	1.15044e+08	1.25848e+08
MePC(32:3e)	MePC	M+Na	750.541	13.781	C41 H78 O7 N1 P1 Na1	2.59352	1.84891e+07	2.18888e+06	1.21359e+07	588455	1.5235	0.60739	0.000939106	0.00397777	1.75334e+07	1.71903e+07	2.10835e+07	2.00441e+07	2.113e+07	1.5231e+07	1.91508e+07	1.65497e+07	1.22893e+07	1.21332e+07	1.21283e+07	1.2287e+07	1.2436e+07	1.30669e+07	1.10144e+07	1.17324e+07
MePC(32:4)	MePC	M+Na	762.504	11.3075	C41 H74 O8 N1 P1 Na1	1.12939	1.98803e+06	278538	3.24359e+06	466835	0.61291	-0.70625	0.000939106	0.00397777	1.5804e+06	2.21733e+06	2.2314e+06	1.81814e+06	2.17607e+06	1.60042e+06	2.09376e+06	2.18671e+06	2.88649e+06	3.20213e+06	2.67807e+06	4.07109e+06	3.2362e+06	3.11594e+06	2.968e+06	3.7908e+06
MePC(32:4e)	MePC	M+Na	748.525	13.293	C41 H76 O7 N1 P1 Na1	4.7355	8.19686e+07	5.76166e+06	1.04819e+08	9.64705e+06	0.782	-0.35476	0.00135938	0.00497765	8.68526e+07	8.20406e+07	8.26482e+07	7.91786e+07	8.08765e+07	7.29767e+07	9.23711e+07	7.88043e+07	1.08884e+08	9.99796e+07	9.68676e+07	9.99961e+07	9.2302e+07	1.06151e+08	1.11682e+08	1.22693e+08
MePC(32:5)	MePC	M+Na	760.489	10.3842	C41 H72 O8 N1 P1 Na1	0.0202145	17293.2	3255.54	19065.3	5819.75	0.90705	-0.14075	0.792896	0.837939	18381.5	17209.5	13561.9	20975.7	17774.1	14027.6	14148.8	22266.4	11618.4	20755.9	12237.7	26496.3	17112.8	19157.5	17646.7	27497.5
MePC(32:5e)	MePC	M+Na	746.51	12.417	C41 H74 O7 N1 P1 Na1	0.999675	1.36335e+06	210025	465125	73047.2	2.9311	1.5515	0.000939106	0.00397777	1.47672e+06	1.42497e+06	900764	1.54716e+06	1.49083e+06	1.45327e+06	1.38887e+06	1.22419e+06	466671	443622	465578	397879	590566	553392	381916	421373
MePC(32:7e)	MePC	M+Na	742.478	11.817	C41 H70 O7 N1 P1 Na1	0.039115	6488.56	4173.04	10006.9	5175.27	0.64841	-0.62503	0.189263	0.257782	3203.22	13118.5	8399.79	3826.33	4.07469e-06	9386.8	5342.02	8631.77	7646.01	10316.2	21924.1	4535.9	10262.1	8405.74	7345.25	9620.23
MePC(33:0)	MePC	M+Na	784.583	14.1759	C42 H84 O8 N1 P1 Na1	0.00183424	334604	106740	333854	102322	1.0022	0.0032363	0.958122	0.972038	233819	413830	283582	384649	505032	219361	230665	405893	322685	368965	348795	373026	260202	163752	521788	311621
MePC(33:0e)	MePC	M+Na	770.603	13.847	C42 H86 O7 N1 P1 Na1	1.54826	1.5723e+06	242577	3.75939e+06	571376	0.41823	-1.2576	0.000939106	0.00397777	1.39954e+06	1.64587e+06	1.63118e+06	1.56622e+06	1.97743e+06	1.13078e+06	1.68662e+06	1.54076e+06	3.61213e+06	3.94893e+06	4.26949e+06	4.73585e+06	3.06699e+06	3.64059e+06	3.03798e+06	3.76314e+06
MePC(33:1)	MePC	M+Na	782.567	12.7226	C42 H82 O8 N1 P1 Na1	4.73988	3.11508e+08	3.36715e+07	2.77798e+08	1.48524e+07	1.1213	0.16523	0.0239487	0.0468347	3.02061e+08	3.49509e+08	2.57151e+08	3.16326e+08	3.63897e+08	2.89769e+08	3.15654e+08	2.97695e+08	2.82469e+08	2.57073e+08	2.85047e+08	2.90983e+08	3.01805e+08	2.64982e+08	2.68485e+08	2.71541e+08
MePC(33:10)	MePC	M+NH4	759.471	4.083	C42 H68 O8 N2 P1	0.0332988	4.07469e-06	0	1239.12	790.205	3.2884e-09	-28.18	0.00146006	0.00533052	4.07469e-06	4.07469e-06	4.07469e-06	4.07469e-06	4.07469e-06	4.07469e-06	4.07469e-06	4.07469e-06	1227.83	2113.12	1290.31	1488.77	701.275	4.07469e-06	671.421	2420.24
MePC(33:2)	MePC	M+Na	780.551	12.9698	C42 H80 O8 N1 P1 Na1	0.402189	518134	100236	705597	82696.7	0.73432	-0.44552	0.00538494	0.0143212	451605	712675	384758	476809	605464	510023	514905	488829	728284	678674	796922	778565	658365	553155	783340	667470
MePC(33:2e)	MePC	M+Na	766.572	13.3342	C42 H82 O7 N1 P1 Na1	0.18641	3.57413e+07	3.41667e+06	3.53333e+07	2.48918e+06	1.0115	0.016561	0.636502	0.703383	3.4788e+07	3.34693e+07	3.44541e+07	3.85881e+07	3.86328e+07	2.98792e+07	4.05505e+07	3.55683e+07	3.26597e+07	3.53847e+07	3.95382e+07	3.79118e+07	3.29444e+07	3.64115e+07	3.46009e+07	3.32155e+07
MePC(33:3)	MePC	M+Na	778.536	10.859	C42 H78 O8 N1 P1 Na1	1.32984	7.9295e+06	2.14204e+06	1.04887e+07	1.55286e+06	0.756	-0.40354	0.0313241	0.0589837	6.26494e+06	8.29581e+06	4.85469e+06	8.45593e+06	9.86072e+06	6.96318e+06	1.16797e+07	7.06104e+06	1.0274e+07	8.21621e+06	1.12297e+07	1.00939e+07	9.64711e+06	1.07408e+07	1.36519e+07	1.00563e+07
MePC(33:4)	MePC	M+Na	776.52	12.0135	C42 H76 O8 N1 P1 Na1	1.05931	3.25718e+06	292521	4.44627e+06	591588	0.73256	-0.44897	0.000939106	0.00397777	3.3064e+06	3.38519e+06	2.85968e+06	3.04736e+06	3.40072e+06	2.88358e+06	3.58118e+06	3.59332e+06	4.78587e+06	3.70537e+06	4.67461e+06	3.87379e+06	5.13883e+06	3.70898e+06	5.02882e+06	4.65388e+06
MePC(33:4e)	MePC	M+Na	762.541	13.903	C42 H78 O7 N1 P1 Na1	1.65492	5.77323e+06	633137	8.62548e+06	1.36424e+06	0.66932	-0.57923	0.000939106	0.00397777	5.21559e+06	6.12065e+06	5.59426e+06	5.30663e+06	6.79803e+06	5.42406e+06	6.5475e+06	5.17909e+06	8.05176e+06	7.85587e+06	1.12014e+07	9.77482e+06	6.89548e+06	8.62065e+06	7.61343e+06	8.99049e+06
MePC(33:5)	MePC	M+NH4	769.549	7.43885	C42 H78 O8 N2 P1	0.12559	50182.3	103735	6095.85	4578.03	8.2322	3.0413	0.318425	0.399191	1735.5	89915.5	2264.71	4898.7	1569.76	2528.61	3016.05	295530	4726.1	17106.4	4490.41	5947.54	3412.69	5895.01	4384	2804.71
MePC(33:6)	MePC	M+NH4	767.533	13.762	C42 H76 O8 N2 P1	2.19554	7.27251e+06	1.18217e+06	2.8685e+06	446090	2.5353	1.3422	0.000939106	0.00397777	7.49193e+06	7.60517e+06	5.34612e+06	7.28156e+06	8.33639e+06	6.42553e+06	9.15132e+06	6.54204e+06	3.2905e+06	2.08914e+06	2.42559e+06	2.95804e+06	3.07608e+06	3.40792e+06	3.03554e+06	2.6652e+06
MePC(33:7)	MePC	M+NH4	765.518	13.091	C42 H74 O8 N2 P1	0.194127	254249	98688.5	377709	331174	0.67313	-0.57103	0.563524	0.634285	330527	404228	271562	177420	184088	163023	352573	150572	312963	108801	262969	355931	293574	236108	1.1775e+06	273825
MePC(34:0)	MePC	M+NH4	793.643	16.619	C43 H90 O8 N2 P1	0.116964	245807	48129.7	214563	33372.1	1.1456	0.19613	0.189263	0.257782	266803	281749	218380	277875	308167	179023	254107	180353	226048	149295	213052	231265	249199	220928	244014	182701
MePC(34:0e)	MePC	M+Na	784.619	17.658	C43 H88 O7 N1 P1 Na1	0.112555	92778.9	22681.3	69081.3	26526.8	1.343	0.4255	0.127808	0.186204	126021	75577.8	58534.7	106894	92351.8	76247.7	116213	90392.4	60276.8	60772	75583.3	118720	42437.3	77798.4	33387.9	83674.5
MePC(34:1)	MePC	M+Na	796.583	12.101	C43 H84 O8 N1 P1 Na1	0.388787	1.04098e+06	237624	1.28579e+06	180044	0.8096	-0.30472	0.0405689	0.0719971	1.40278e+06	1.04641e+06	812381	946239	1.15309e+06	663421	1.26e+06	1.04349e+06	1.19274e+06	1.29329e+06	1.11351e+06	1.5993e+06	1.48688e+06	1.32147e+06	1.08594e+06	1.19317e+06
MePC(34:1e)	MePC	M+Na	782.603	16.5325	C43 H86 O7 N1 P1 Na1	0.258639	1.52717e+06	199624	1.36166e+06	275362	1.1215	0.16549	0.127808	0.186204	1.7981e+06	1.63224e+06	1.31236e+06	1.67381e+06	1.35186e+06	1.30287e+06	1.71729e+06	1.42882e+06	1.23672e+06	1.17971e+06	1.3454e+06	1.79687e+06	1.21702e+06	1.53972e+06	950419	1.62745e+06
MePC(34:2)	MePC	M+NH4	789.612	15.4399	C43 H86 O8 N2 P1	4.33528	1.69368e+08	1.86717e+07	1.43937e+08	1.44655e+07	1.1767	0.23473	0.0100817	0.023429	1.71921e+08	1.6737e+08	1.91329e+08	1.76545e+08	1.95486e+08	1.52012e+08	1.59452e+08	1.4083e+08	1.58517e+08	1.3668e+08	1.55061e+08	1.67124e+08	1.31721e+08	1.37576e+08	1.25982e+08	1.38832e+08
MePC(34:2e)	MePC	M+Na	780.588	14.887	C43 H84 O7 N1 P1 Na1	1.11322	1.95305e+06	148432	846057	208680	2.3084	1.2069	0.000939106	0.00397777	2.1259e+06	1.90276e+06	1.95666e+06	2.0706e+06	1.94404e+06	1.71679e+06	2.11519e+06	1.79243e+06	1.33689e+06	852432	804292	731506	676338	865771	778854	722375
MePC(34:3)	MePC	M+Na	792.551	13.0456	C43 H80 O8 N1 P1 Na1	0.707785	4.41504e+06	570365	5.23384e+06	833276	0.84356	-0.24544	0.0405689	0.0719971	3.80398e+06	4.48237e+06	4.26185e+06	4.62252e+06	4.91745e+06	4.16099e+06	5.39778e+06	3.6734e+06	4.7382e+06	5.0802e+06	5.37428e+06	4.59249e+06	5.16594e+06	5.59462e+06	7.01489e+06	4.31014e+06
MePC(34:3e)	MePC	M+NH4	773.617	9.38	C43 H86 O7 N2 P1	0.010642	3572.57	3089.1	4427.84	4765.84	0.80684	-0.30964	0.958122	0.972038	1387.64	5524.56	3780.34	326.311	9777.41	943.383	2378.07	4462.84	3068.55	1065.64	1568.23	8067.5	938.776	14707	4126.69	1880.27
MePC(34:4)	MePC	M+NH4	785.58	12.7151	C43 H82 O8 N2 P1	0.55176	7.6775e+06	807312	7.08713e+06	419107	1.0833	0.11544	0.0405689	0.0719971	7.61822e+06	8.19474e+06	6.54726e+06	7.77847e+06	9.04009e+06	6.66832e+06	8.01529e+06	7.55762e+06	7.38418e+06	6.54002e+06	7.49285e+06	7.43712e+06	7.39269e+06	6.83107e+06	7.15728e+06	6.46181e+06
MePC(34:4e)	MePC	M+Na	776.556	14.6819	C43 H80 O7 N1 P1 Na1	4.96158	8.27223e+07	1.02736e+07	1.09488e+08	1.21824e+07	0.75553	-0.40443	0.00194753	0.00637467	9.34638e+07	7.81278e+07	6.77779e+07	8.67733e+07	8.90582e+07	7.28314e+07	9.66241e+07	7.7122e+07	1.09651e+08	8.94458e+07	1.24446e+08	1.16187e+08	9.82179e+07	1.22238e+08	1.01792e+08	1.1393e+08
MePC(34:5)	MePC	M+Na	788.52	11.0048	C43 H76 O8 N1 P1 Na1	0.323593	237329	73106.4	371177	85695.5	0.6394	-0.64522	0.0100817	0.023429	306481	187634	203203	271180	343104	172644	280204	134183	304326	315144	407707	462703	247476	350575	374858	506624
MePC(34:5e)	MePC	M+Na	774.541	13.3612	C43 H78 O7 N1 P1 Na1	3.91087	4.53163e+07	4.90831e+06	6.03354e+07	4.16728e+06	0.75107	-0.41297	0.000939106	0.00397777	4.81642e+07	4.28988e+07	3.90752e+07	4.42553e+07	5.02025e+07	3.96975e+07	5.30075e+07	4.52292e+07	6.45352e+07	5.81537e+07	5.63135e+07	5.34802e+07	6.49865e+07	6.33632e+07	6.24256e+07	5.94252e+07
MePC(34:6)	MePC	M+Na	786.504	10.556	C43 H74 O8 N1 P1 Na1	0.747497	221624	48758.9	743182	166766	0.29821	-1.7456	0.000939106	0.00397777	206395	222272	150235	260299	253108	155822	286577	238283	688416	601442	758944	931284	548301	808056	596844	1.01217e+06
MePC(34:6e)	MePC	M+Na	772.525	12.4521	C43 H76 O7 N1 P1 Na1	0.563555	1.36913e+06	271206	979371	137239	1.398	0.48334	0.00740553	0.0183503	1.5368e+06	1.2433e+06	878416	1.6301e+06	1.66287e+06	1.28712e+06	1.5426e+06	1.17186e+06	1.06388e+06	773322	1.13345e+06	824781	1.15356e+06	994211	915896	975862
MePC(34:7)	MePC	M+Na	784.489	11.765	C43 H72 O8 N1 P1 Na1	0.289922	91534.3	17476.3	15355	10572.5	5.9612	2.5756	0.000939106	0.00397777	93528.6	116568	53981.1	91340.2	99094.6	88060.6	93151.7	96549.6	14505.5	4803.39	4595.4	30528.9	29693.3	19969.5	12970.7	5773.57
MePC(34:7e)	MePC	M+Na	770.51	11.1405	C43 H74 O7 N1 P1 Na1	0.187576	66263.8	36096.6	112223	17685.3	0.59046	-0.76008	0.0135873	0.0294907	48351.9	130393	101103	90750.4	47042.3	38173.9	33988.7	40306.4	107864	97822.3	108979	107109	95343.7	102536	146363	131769
MePC(34:8)	MePC	M+NH4	777.518	12.0253	C43 H74 O8 N2 P1	0.685574	1.60367e+06	146876	2.09604e+06	219699	0.76509	-0.38629	0.00135938	0.00497765	1.67223e+06	1.63511e+06	1.39814e+06	1.48398e+06	1.70974e+06	1.42468e+06	1.73003e+06	1.77542e+06	2.22358e+06	1.75453e+06	2.16918e+06	1.87693e+06	2.34022e+06	1.91799e+06	2.33549e+06	2.1504e+06
MePC(34:8e)	MePC	M+NH4	763.538	13.88	C43 H76 O7 N2 P1	0.967237	1.83024e+06	179337	2.71216e+06	254417	0.67483	-0.56741	0.000939106	0.00397777	1.76011e+06	1.86782e+06	1.7946e+06	1.81915e+06	2.17302e+06	1.71875e+06	1.94905e+06	1.55937e+06	2.61852e+06	2.5822e+06	3.11884e+06	2.76331e+06	2.46539e+06	2.70443e+06	2.40744e+06	3.03716e+06
MePC(35:0e)	MePC	M+Na	798.635	15.249	C44 H90 O7 N1 P1 Na1	0.553177	215555	143795	586816	243854	0.36733	-1.4449	0.0100817	0.023429	266698	237536	80770.7	530992	124010	188326	201615	94490.7	605995	375776	879152	752893	524358	165983	531148	859222
MePC(35:1)	MePC	M+Na	810.598	14.793	C44 H86 O8 N1 P1 Na1	1.98761	5.83058e+06	1.28688e+06	1.94341e+06	1.08025e+06	3.0002	1.585	0.00194753	0.00637467	6.57057e+06	7.46951e+06	5.02503e+06	6.48622e+06	6.72662e+06	4.29737e+06	6.23039e+06	3.83896e+06	1.86315e+06	1.83765e+06	1.09522e+06	4.31663e+06	2.01856e+06	1.35295e+06	2.27512e+06	787996
MePC(35:1e)	MePC	M+Na	796.619	17.104	C44 H88 O7 N1 P1 Na1	0.131372	21232.9	5159.31	39420.2	8489.12	0.53863	-0.89264	0.000939106	0.00397777	22049.1	20716.9	11729.7	21809.9	20366.8	18433	29683.1	25074.5	33543.2	43068.1	38010.1	55134.9	30740.5	46713.2	30757.8	37393.7
MePC(35:2)	MePC	M+Na	808.583	13.248	C44 H84 O8 N1 P1 Na1	8.55843	1.8871e+08	3.41261e+07	1.12788e+08	1.97991e+07	1.6731	0.74256	0.00135938	0.00497765	1.84892e+08	2.01749e+08	1.40524e+08	1.72335e+08	2.295e+08	1.66062e+08	2.42728e+08	1.71893e+08	1.33059e+08	9.31296e+07	1.14932e+08	1.03871e+08	1.18004e+08	1.04715e+08	1.46704e+08	8.789e+07
MePC(35:2e)	MePC	M+Na	794.603	13.12	C44 H86 O7 N1 P1 Na1	1.07348	8.03612e+06	967123	9.69579e+06	1.40203e+06	0.82883	-0.27086	0.0135873	0.0294907	7.29419e+06	8.51633e+06	7.3394e+06	7.38673e+06	7.87641e+06	8.77573e+06	9.92088e+06	7.17925e+06	9.2608e+06	8.95234e+06	1.02119e+07	8.64022e+06	1.01235e+07	9.43479e+06	1.27278e+07	8.21486e+06
MePC(35:3)	MePC	M+Na	806.567	15.1625	C44 H82 O8 N1 P1 Na1	0.622764	499071	117774	894707	155756	0.5578	-0.84217	0.00135938	0.00497765	515121	509788	287048	603839	503351	426946	684078	462396	1.10105e+06	850204	625360	881997	1.10167e+06	837082	934825	825478
MePC(35:3e)	MePC	M+Na	792.588	13.5563	C44 H84 O7 N1 P1 Na1	2.65644	2.90803e+07	3.88439e+06	3.67576e+07	2.42282e+06	0.79114	-0.338	0.00387604	0.0109285	2.8234e+07	2.73199e+07	2.84664e+07	2.78641e+07	3.40754e+07	2.45205e+07	3.58873e+07	2.62747e+07	3.68581e+07	3.24307e+07	3.89244e+07	3.75881e+07	3.84244e+07	3.8575e+07	3.76731e+07	3.35868e+07
MePC(35:4)	MePC	M+Na	804.551	11.1	C44 H80 O8 N1 P1 Na1	5.502	2.92535e+07	7.49276e+06	5.8166e+07	7.96276e+06	0.50293	-0.99157	0.000939106	0.00397777	2.44693e+07	2.49385e+07	2.1623e+07	3.2814e+07	3.72698e+07	2.21547e+07	4.21201e+07	2.86384e+07	6.23145e+07	5.06277e+07	5.70222e+07	5.54311e+07	6.62015e+07	5.10754e+07	7.1962e+07	5.06933e+07
MePC(35:4e)	MePC	M+Na	790.572	12.8694	C44 H82 O7 N1 P1 Na1	8.88933	1.00541e+08	1.90989e+07	1.75028e+08	1.80552e+07	0.57443	-0.7998	0.000939106	0.00397777	8.98683e+07	1.0366e+08	7.87656e+07	1.08649e+08	1.15893e+08	8.73383e+07	1.35552e+08	8.46011e+07	1.78949e+08	1.54597e+08	1.87858e+08	1.68844e+08	1.56916e+08	1.78091e+08	2.09829e+08	1.65142e+08
MePC(35:5)	MePC	M+Na	802.536	11.3891	C44 H78 O8 N1 P1 Na1	0.351909	473009	188721	657595	64801.1	0.7193	-0.47533	0.0520296	0.0879514	588752	634868	382490	561775	762620	330375	265649	257544	700876	669651	568246	757225	717746	598524	616051	632437
MePC(35:6)	MePC	M+Na	800.52	10.84	C44 H76 O8 N1 P1 Na1	0.397647	525015	128969	722493	93390.6	0.72667	-0.46063	0.0100817	0.023429	398343	540280	346679	520298	655577	513240	746473	479226	718184	602477	749886	700790	690431	750471	918143	649561
MePC(36:0)	MePC	M+NH4	821.674	7.48695	C45 H94 O8 N2 P1	0.0383712	1730.24	1514.18	4017.72	2146.88	0.43065	-1.2154	0.018129	0.0375566	4803.9	1739.44	69.9668	2615.49	450.36	585.853	1557.02	2019.92	3406.07	3276.3	2676.69	730.131	6923.39	5164.37	3096.35	6868.46
MePC(36:1)	MePC	M+Na	824.614	14.5383	C45 H88 O8 N1 P1 Na1	1.59563	1.1503e+06	466151	3.4468e+06	359934	0.33373	-1.5832	0.000939106	0.00397777	1.53841e+06	557632	624995	1.35703e+06	1.6132e+06	1.45043e+06	601771	1.45896e+06	3.83515e+06	3.1158e+06	3.60091e+06	3.1853e+06	3.7699e+06	2.82345e+06	3.61682e+06	3.62704e+06
MePC(36:10)	MePC	M+NH4	801.518	10.844	C45 H74 O8 N2 P1	0.27892	256751	64654	354370	46108.5	0.72453	-0.46489	0.0135873	0.0294907	191343	274567	161200	257560	336545	245078	349882	237831	326861	308927	359753	343806	316706	394000	447361	337543
MePC(36:1e)	MePC	M+Na	810.635	17.3095	C45 H90 O7 N1 P1 Na1	0.335329	222537	64395.2	101106	29924	2.201	1.1382	0.0027616	0.00834568	243445	195542	121934	297927	300622	163202	263163	194461	102556	82356.6	125445	122889	47840.3	115101	76666.3	135995
MePC(36:2)	MePC	M+Na	822.598	12.234	C45 H86 O8 N1 P1 Na1	0.970337	1.15105e+06	587795	2.29058e+06	634154	0.50251	-0.99276	0.00740553	0.0183503	2.11613e+06	1.32967e+06	596442	665704	1.37033e+06	599825	1.78192e+06	748378	1.67464e+06	2.31692e+06	1.45694e+06	3.26997e+06	2.85468e+06	2.66299e+06	1.72599e+06	2.36252e+06
MePC(36:2e)	MePC	M+Na	808.619	16.8897	C45 H88 O7 N1 P1 Na1	0.368642	196145	42687.7	68744.7	8670.17	2.8532	1.5126	0.000939106	0.00397777	181835	171646	299683	174515	189126	183603	172563	196187	67968.2	70744.3	63536.2	86791.5	58554.8	61185.9	69874.1	71302.3
MePC(36:3)	MePC	M+Na	820.583	12.9046	C45 H84 O8 N1 P1 Na1	4.34092	9.62745e+06	1.90099e+06	2.75034e+07	6.2464e+06	0.35005	-1.5144	0.000939106	0.00397777	8.99804e+06	1.00245e+07	6.03134e+06	1.02404e+07	1.07813e+07	9.44858e+06	1.26921e+07	8.80331e+06	3.15454e+07	2.1047e+07	3.36292e+07	1.96251e+07	3.21227e+07	2.15954e+07	3.49421e+07	2.55205e+07
MePC(36:3e)	MePC	M+Na	806.603	13.8222	C45 H86 O7 N1 P1 Na1	0.742249	314730	91489.2	807035	68605.2	0.38998	-1.3585	0.000939106	0.00397777	339204	318204	282266	352451	238161	175368	488327	323856	780660	818349	951984	735576	786677	752758	850598	779678
MePC(36:4)	MePC	M+Na	818.567	14.1118	C45 H82 O8 N1 P1 Na1	1.57332	976992	135417	3.15978e+06	400944	0.3092	-1.6934	0.000939106	0.00397777	949510	921857	815015	1.06823e+06	1.15789e+06	862585	1.16259e+06	878260	3.15424e+06	2.44068e+06	3.69986e+06	3.27062e+06	2.73858e+06	3.2446e+06	3.23156e+06	3.49806e+06
MePC(36:4e)	MePC	M+Na	804.588	13.3538	C45 H84 O7 N1 P1 Na1	1.51216	385710	71348.8	2.37527e+06	282870	0.16239	-2.6225	0.000939106	0.00397777	384879	320849	329941	383255	418887	363394	543037	341436	2.28975e+06	2.2017e+06	2.89765e+06	2.21518e+06	2.34972e+06	2.0158e+06	2.68136e+06	2.35102e+06
MePC(36:5)	MePC	M+NH4	811.596	13.3292	C45 H84 O8 N2 P1	0.761519	1.4774e+07	2.39487e+06	1.34036e+07	1.18538e+06	1.1022	0.14044	0.270149	0.348585	1.56437e+07	1.48089e+07	1.26327e+07	1.35231e+07	1.84554e+07	1.16889e+07	1.77668e+07	1.36726e+07	1.44932e+07	1.19411e+07	1.18991e+07	1.45609e+07	1.31783e+07	1.33193e+07	1.49953e+07	1.28419e+07
MePC(36:5e)	MePC	M+Na	802.572	16.3394	C45 H82 O7 N1 P1 Na1	0.318802	419364	50732.1	307452	46502	1.364	0.44784	0.0027616	0.00834568	383024	511392	335440	424839	439633	398050	432808	429723	264126	309855	322003	406634	278424	293465	263201	321910
MePC(36:6)	MePC	M+NH4	809.58	12.2734	C45 H82 O8 N2 P1	1.49548	1.89497e+07	2.64792e+06	2.22347e+07	2.24903e+06	0.85225	-0.23064	0.0405689	0.0719971	1.87119e+07	2.00336e+07	1.47056e+07	1.92096e+07	2.26087e+07	1.69784e+07	2.20668e+07	1.72828e+07	2.20587e+07	1.99541e+07	2.09282e+07	2.57153e+07	2.09403e+07	2.52772e+07	2.29764e+07	2.00278e+07
MePC(36:6e)	MePC	M+Na	800.556	15.5971	C45 H80 O7 N1 P1 Na1	0.345601	188057	30916.1	76835.6	19403.6	2.4475	1.2913	0.000939106	0.00397777	180833	203417	145896	210847	214854	163279	229619	155712	88996.2	81793.2	95999.8	75927.5	92541.5	54385.8	84135.6	40905.2
MePC(36:7)	MePC	M+NH4	807.565	13.7861	C45 H80 O8 N2 P1	0.689675	627266	101351	1.08246e+06	141238	0.57948	-0.78716	0.000939106	0.00397777	578007	653497	460102	648651	788158	552967	721297	615447	1.21225e+06	903305	1.29238e+06	1.01096e+06	1.07564e+06	979546	1.21661e+06	968964
MePC(36:7e)	MePC	M+Na	798.541	14.656	C45 H78 O7 N1 P1 Na1	0.434946	273525	25239.4	447113	44885.6	0.61176	-0.70896	0.000939106	0.00397777	282424	272359	240903	265924	312842	287088	289011	237650	430208	387431	480944	478440	391996	510976	470919	425988
MePC(36:8)	MePC	M+NH4	805.549	11.066	C45 H78 O8 N2 P1	3.86093	1.39511e+07	4.75588e+06	2.8541e+07	3.93025e+06	0.48881	-1.0327	0.000939106	0.00397777	1.20214e+07	1.25493e+07	1.07258e+07	1.66488e+07	1.93034e+07	1.12626e+07	2.15621e+07	7.53573e+06	3.02333e+07	2.56585e+07	2.79519e+07	2.6597e+07	3.24414e+07	2.50615e+07	3.56719e+07	2.47122e+07
MePC(36:9)	MePC	M+NH4	803.533	11.7707	C45 H76 O8 N2 P1	0.0589122	199719	64430.1	216201	22177.6	0.92377	-0.1144	0.958122	0.972038	56969.8	246161	188839	201616	253727	225941	247490	177004	220901	197597	212310	253222	211468	218196	235584	180327
MePC(37:0)	MePC	M+Na	840.645	17.634	C46 H92 O8 N1 P1 Na1	0.10648	40941.5	12250.2	58751.4	16783.1	0.69686	-0.52106	0.0520296	0.0879514	45826.6	44046.7	30036.4	47072.2	49045.6	26705.5	59543.8	25255.1	63001.1	38964.7	80691	36961.8	55594.2	57388.3	54633.6	82776.6
MePC(37:0e)	MePC	M+Na	826.666	18.305	C46 H94 O7 N1 P1 Na1	0.108735	168919	169984	111975	167825	1.5086	0.59316	0.958122	0.972038	18853.7	401269	6513.12	13352.8	352793	195530	39492.2	323550	28461.8	29831	28440.6	476006	23194	28109.1	257818	23935.1
MePC(37:1)	MePC	M+Na	838.63	15.06	C46 H90 O8 N1 P1 Na1	10.0654	1.52185e+08	2.68196e+07	5.89071e+07	9.2361e+06	2.5835	1.3693	0.000939106	0.00397777	1.54264e+08	1.64268e+08	1.17003e+08	1.50822e+08	1.96446e+08	1.24231e+08	1.76272e+08	1.34175e+08	6.64718e+07	4.85735e+07	5.58567e+07	5.44173e+07	7.26048e+07	6.07388e+07	6.62736e+07	4.63206e+07
MePC(37:2)	MePC	M+Na	836.614	14.622	C46 H88 O8 N1 P1 Na1	8.46185	2.35304e+08	4.34818e+07	1.54892e+08	2.83099e+07	1.5192	0.60326	0.00387604	0.0109285	2.54067e+08	2.73579e+08	1.65756e+08	2.1504e+08	2.73055e+08	2.01878e+08	2.89671e+08	2.09385e+08	1.82276e+08	1.14569e+08	1.68218e+08	1.48768e+08	1.79376e+08	1.41586e+08	1.85546e+08	1.18794e+08
MePC(37:2e)	MePC	M+Na	822.635	14.514	C46 H90 O7 N1 P1 Na1	0.482023	1.787e+06	280555	2.14819e+06	306031	0.83186	-0.26558	0.0405689	0.0719971	1.41842e+06	2.07886e+06	1.68613e+06	1.76732e+06	2.1836e+06	1.61134e+06	2.03103e+06	1.51926e+06	2.50521e+06	1.91213e+06	2.48972e+06	1.79289e+06	2.19532e+06	1.87247e+06	2.47712e+06	1.94064e+06
MePC(37:3)	MePC	M+Na	834.598	13.68	C46 H86 O8 N1 P1 Na1	12.9606	5.60624e+08	6.72995e+07	7.33707e+08	5.71244e+07	0.7641	-0.38817	0.0027616	0.00834568	5.45791e+08	6.18647e+08	4.5326e+08	5.67567e+08	6.53171e+08	5.17257e+08	6.19714e+08	5.09581e+08	7.80212e+08	6.15619e+08	7.54333e+08	7.59092e+08	7.21922e+08	7.18153e+08	8.04232e+08	7.16093e+08
MePC(37:3e)	MePC	M+Na	820.619	13.9491	C46 H88 O7 N1 P1 Na1	0.213721	1.11557e+06	255195	987018	167210	1.1302	0.17664	0.270149	0.348585	1.02173e+06	1.01689e+06	1.0441e+06	1.1593e+06	1.38199e+06	729125	1.56148e+06	1.00996e+06	964575	969448	894538	1.10374e+06	1.18479e+06	943884	1.16467e+06	670493
MePC(37:4)	MePC	M+Na	832.583	12.832	C46 H84 O8 N1 P1 Na1	2.04586	8.53001e+06	1.56143e+06	4.41509e+06	839166	1.932	0.9501	0.00135938	0.00497765	8.7802e+06	1.06538e+07	5.46523e+06	9.93015e+06	8.64319e+06	8.76593e+06	8.5064e+06	7.49517e+06	3.72348e+06	3.12598e+06	4.13331e+06	5.33516e+06	4.42256e+06	4.90221e+06	5.63482e+06	4.04324e+06
MePC(37:4e)	MePC	M+Na	818.603	13.745	C46 H86 O7 N1 P1 Na1	0.883171	2.14515e+06	597032	1.21943e+06	315034	1.7591	0.81487	0.00387604	0.0109285	1.92561e+06	2.23128e+06	1.49678e+06	2.07907e+06	2.78619e+06	1.50695e+06	3.21553e+06	1.91975e+06	893814	1.06813e+06	1.44299e+06	893425	1.64853e+06	1.57629e+06	1.31201e+06	920255
MePC(37:5)	MePC	M+NH4	825.612	16.0224	C46 H86 O8 N2 P1	0.532947	96318.5	20297.3	353406	65035.5	0.27254	-1.8754	0.000939106	0.00397777	93464.7	91835.4	126476	68730.1	113114	78073.8	82832.7	116021	382506	341964	275088	485537	351417	312235	300926	377573
MePC(37:5e)	MePC	M+Na	816.588	12.9278	C46 H84 O7 N1 P1 Na1	2.87407	1.47373e+07	3.20825e+06	2.40861e+07	5.23879e+06	0.61186	-0.70873	0.00538494	0.0143212	1.33879e+07	1.49088e+07	9.00575e+06	1.55582e+07	1.82721e+07	1.33747e+07	1.94024e+07	1.39886e+07	2.89725e+07	1.9307e+07	2.74888e+07	1.76016e+07	2.76517e+07	2.37426e+07	3.02434e+07	1.76809e+07
MePC(37:6)	MePC	M+Na	828.551	11.6802	C46 H80 O8 N1 P1 Na1	0.477805	1.71694e+06	107393	1.46197e+06	121769	1.1744	0.23193	0.00135938	0.00497765	1.64881e+06	1.8652e+06	1.62796e+06	1.67989e+06	1.85171e+06	1.81256e+06	1.64054e+06	1.60889e+06	1.60199e+06	1.4755e+06	1.53061e+06	1.61807e+06	1.43435e+06	1.31591e+06	1.43681e+06	1.28254e+06
MePC(38:0)	MePC	M+Na	854.661	16.416	C47 H94 O8 N1 P1 Na1	0.0142082	7082.06	5295.71	5516.84	9268.47	1.2837	0.36033	0.268736	0.348585	4.07469e-06	16245.4	9566.3	9510.18	6267.32	1709.8	3495.04	9862.39	916.973	4.07469e-06	2730.67	4.07469e-06	23954.4	32.2401	294.959	16205.5
MePC(38:0e)	MePC	M+Na	840.682	26.663	C47 H96 O7 N1 P1 Na1	0.040975	14153.2	7274.2	19158.4	10351	0.73875	-0.43685	0.318425	0.399191	5851.25	13474.6	20354.6	13098.4	14591.4	4675.62	27244.5	13935.6	23314.2	19745.9	18860.6	1375.16	16469.1	25285.5	11414.5	36802.5
MePC(38:1)	MePC	M+Na	852.645	15.448	C47 H92 O8 N1 P1 Na1	0.186093	6329.28	7130.41	48947.1	32644.4	0.12931	-2.9511	0.00505122	0.0141879	4.07469e-06	4.07469e-06	10275.2	11171.7	4.07469e-06	4.07469e-06	17759.1	11428.2	4444.92	79153.3	11764.3	56161.9	38962.9	31756.5	75043.5	94289.2
MePC(38:2)	MePC	M+Na	850.63	14.7837	C47 H90 O8 N1 P1 Na1	2.17612	863117	225037	4.96325e+06	462028	0.1739	-2.5237	0.000939106	0.00397777	877006	747864	701014	859432	1.06012e+06	676061	1.31409e+06	669346	4.89907e+06	4.11805e+06	5.17983e+06	5.48155e+06	5.07821e+06	4.86118e+06	4.58386e+06	5.50427e+06
MePC(38:3)	MePC	M+Na	848.614	13.445	C47 H88 O8 N1 P1 Na1	0.442042	117173	25863.9	295878	44748.6	0.39602	-1.3364	0.000939106	0.00397777	112687	114663	95104.8	132523	143076	86001.1	159152	94180	343621	220283	346719	262215	303154	259158	322971	308903
MePC(38:4)	MePC	M+Na	846.598	13.0044	C47 H86 O8 N1 P1 Na1	1.04619	543971	94337.6	1.6139e+06	440096	0.33705	-1.5689	0.000939106	0.00397777	437115	533752	442477	576293	686044	542993	662002	471089	1.87963e+06	1.0726e+06	1.93796e+06	1.26356e+06	1.66896e+06	1.25189e+06	2.39e+06	1.44656e+06
MePC(38:4e)	MePC	M+Na	832.619	17.084	C47 H88 O7 N1 P1 Na1	0.0169051	176883	48934.1	172190	47387.5	1.0273	0.038796	0.874826	0.905144	192340	180569	95329.2	220639	150626	131253	245318	198994	169974	161461	161746	248380	132894	212272	94906.7	195888
MePC(38:5)	MePC	M+Na	844.583	11.9119	C47 H84 O8 N1 P1 Na1	0.44404	417137	49837.9	668874	205448	0.62364	-0.68121	0.0135873	0.0294907	422508	447968	328695	402013	445948	372420	490865	426679	748822	556427	784175	282801	832497	580571	946449	619251
MePC(38:5e)	MePC	M+Na	830.603	15.8156	C47 H86 O7 N1 P1 Na1	0.75135	696710	102152	1.27083e+06	261192	0.54823	-0.86714	0.00135938	0.00497765	696276	655020	561961	895110	631461	681474	787670	664708	1.35399e+06	1.23297e+06	1.57127e+06	1.42875e+06	799234	1.23415e+06	1.01796e+06	1.52834e+06
MePC(38:6)	MePC	M+Na	842.567	10.866	C47 H82 O8 N1 P1 Na1	0.0180667	88569.2	21340.4	84787.4	32249.6	1.0446	0.062955	0.494837	0.568203	66481.8	112760	100239	100054	104909	69651.8	99191.3	55266.7	54638	65459	101228	73423.9	94218.9	72192.3	62637.8	154502
MePC(38:6e)	MePC	M+Na	828.588	16.582	C47 H84 O7 N1 P1 Na1	0.083019	19100.5	11502.1	8320.64	4893.23	2.2956	1.1988	0.0405689	0.0719971	18969.4	8957.81	33008.6	10993.1	36200.1	10425.8	26834.7	7414.27	8586.99	16186.1	2918.21	4095.28	13279.4	2740.08	8807.15	9951.91
MePC(38:7)	MePC	M+Na	840.551	11.7038	C47 H80 O8 N1 P1 Na1	0.428965	148409	27543.5	332385	79995.9	0.4465	-1.1633	0.000939106	0.00397777	130534	141598	105505	169317	157035	137991	198228	147066	400209	253213	416045	216976	376722	275827	418842	301251
MePC(38:7e)	MePC	M+Na	826.572	15.9012	C47 H82 O7 N1 P1 Na1	0.576202	525447	74650.9	835427	71561.4	0.62896	-0.66897	0.000939106	0.00397777	541845	598575	378288	527716	584659	459804	588026	524666	872000	754987	920643	882267	712972	888982	809445	842123
MePC(38:8)	MePC	M+NH4	833.58	11.2418	C47 H82 O8 N2 P1	2.72571	6.62091e+06	1.22505e+06	1.32617e+07	945659	0.49925	-1.0022	0.000939106	0.00397777	6.71006e+06	6.55621e+06	4.80302e+06	7.12984e+06	8.06512e+06	5.33222e+06	8.31357e+06	6.05723e+06	1.28882e+07	1.16207e+07	1.37815e+07	1.47474e+07	1.26883e+07	1.29082e+07	1.35585e+07	1.39006e+07
MePC(38:9)	MePC	M+Na	836.52	10.8263	C47 H76 O8 N1 P1 Na1	0.921141	648671	208546	1.48192e+06	290121	0.43772	-1.1919	0.000939106	0.00397777	710931	649659	497955	926417	740686	552134	843603	267986	1.44014e+06	1.04281e+06	1.60461e+06	1.33423e+06	1.41444e+06	1.28593e+06	1.96366e+06	1.76953e+06
MePC(39:0)	MePC	M+Na	868.677	16.7374	C48 H96 O8 N1 P1 Na1	0.964873	469261	45054	1.32085e+06	242513	0.35527	-1.493	0.000939106	0.00397777	470664	498590	474615	440456	517007	390191	524106	438458	1.16378e+06	1.21511e+06	1.36898e+06	1.82014e+06	1.01544e+06	1.24987e+06	1.26257e+06	1.47091e+06
MePC(39:1e)	MePC	M+NH4	847.726	17.7347	C48 H100 O7 N2 P1	0.0135082	20567.8	9271.32	22204.8	9023.78	0.92628	-0.11048	0.958122	0.972038	29554.8	16402.9	17251.3	17380.1	33317	4267.32	27683.8	18685.5	11092.5	17347.1	35215.2	29585.7	16405.8	12348.2	26197.1	29447
MePC(39:2)	MePC	M+Na	864.645	15.3581	C48 H92 O8 N1 P1 Na1	0.219373	2.69618e+06	555516	2.89488e+06	442711	0.93136	-0.10259	0.494837	0.568203	2.67505e+06	3.10105e+06	1.79179e+06	2.99008e+06	2.92103e+06	2.06293e+06	3.48187e+06	2.54566e+06	2.96448e+06	2.10183e+06	3.52133e+06	3.05347e+06	2.74338e+06	2.81318e+06	3.35234e+06	2.60906e+06
MePC(39:2e)	MePC	M+Na	850.666	16.625	C48 H94 O7 N1 P1 Na1	0.196962	93207.4	26850.3	46649.2	22038.2	1.998	0.99859	0.00135938	0.00497765	102079	74394	69628.2	100323	89134.3	89864.3	151395	68841.4	69514.1	19095.7	60408.2	68334.6	41563.2	66133	28153.3	19991.7
MePC(39:3)	MePC	M+Na	862.63	16.04	C48 H90 O8 N1 P1 Na1	0.088924	476343	112903	533711	347916	0.89251	-0.16406	0.563524	0.634285	446805	521020	333736	460338	641073	314687	582894	510189	519277	245523	350401	430802	1.15302e+06	995116	322896	252658
MePC(39:4)	MePC	M+Na	860.614	12.9608	C48 H88 O8 N1 P1 Na1	0.381031	684067	162533	452362	223610	1.5122	0.59666	0.0405689	0.0719971	573839	712842	614357	782708	840276	473312	941072	534132	646209	275285	437477	87136.7	611263	335484	781740	444301
MePC(39:4e)	MePC	M+Na	846.635	16.185	C48 H90 O7 N1 P1 Na1	0.0262703	89131.9	18421.1	93517	16053.8	0.95311	-0.069287	0.636502	0.703383	77820.5	104629	57711	116164	89766.3	77002.1	88927.2	101035	75582.8	93807.3	112821	120097	80831	93004.3	77969.7	94021.7
MePC(39:5)	MePC	M+Na	858.598	12.5235	C48 H86 O8 N1 P1 Na1	1.62593	1.0851e+07	2.08896e+06	1.46153e+07	3.16864e+06	0.74244	-0.42965	0.018129	0.0375566	1.09159e+07	1.17521e+07	7.12814e+06	1.17309e+07	1.32615e+07	9.303e+06	1.31435e+07	9.57297e+06	1.64144e+07	1.07037e+07	1.67963e+07	1.32754e+07	1.42483e+07	1.12286e+07	2.03653e+07	1.38905e+07
MePC(39:5e)	MePC	M+NH4	839.664	19.291	C48 H92 O7 N2 P1	0.0596245	169220	64130.1	186557	36238.2	0.90707	-0.14071	0.792896	0.837939	162551	182095	101821	186211	257567	115440	254671	93407.1	204003	163505	157743	236523	159171	169012	243321	159174
MePC(39:6)	MePC	M+Na	856.583	11.88	C48 H84 O8 N1 P1 Na1	2.17551	8.50915e+06	1.59471e+06	3.73529e+06	1.61055e+06	2.278	1.1878	0.00135938	0.00497765	8.29705e+06	9.27585e+06	7.16016e+06	9.71357e+06	9.41452e+06	6.0316e+06	1.08601e+07	7.3203e+06	6.50822e+06	2.53966e+06	3.93157e+06	2.15701e+06	4.40391e+06	2.3332e+06	5.40993e+06	2.59884e+06
MePC(39:7)	MePC	M+Na	854.567	12.1459	C48 H82 O8 N1 P1 Na1	0.426559	616337	110152	412603	70042.9	1.4938	0.57896	0.00387604	0.0109285	652221	731048	428797	592838	732807	537613	713549	541826	481448	379161	312607	443901	454574	410053	498194	320889
MePC(40:10)	MePC	M+NH4	857.58	8.213	C49 H82 O8 N2 P1	0.0581945	38560.7	22825	27597.9	19917.4	1.3972	0.48257	0.227147	0.301073	10083.6	47028.1	18345	82520.9	40599.1	50567.8	22033	37308	67088.6	9953.08	16469.5	14221.4	20723.3	12960.6	34700.2	44666.3
MePC(40:2e)	MePC	M+NH4	859.726	17.1542	C49 H100 O7 N2 P1	0.130325	49024.5	6615.18	31617.7	5688.09	1.5505	0.63277	0.000939106	0.00397777	55748	51095.5	44291.1	52291.4	50469.6	38642.5	57331.6	42325.9	24314	34716	37942.8	29027.5	32424.7	23043.7	33647.1	37825.6
MePC(40:3)	MePC	M+NH4	871.69	14.877	C49 H96 O8 N2 P1	0.000552774	1110.17	2159.19	1146.85	3243.79	0.96802	-0.046896	0.700128	0.769972	4.07469e-06	4.07469e-06	5676.63	3204.76	4.07469e-06	4.07469e-06	4.07469e-06	4.07469e-06	4.07469e-06	4.07469e-06	4.07469e-06	4.07469e-06	4.07469e-06	4.07469e-06	9174.83	4.07469e-06
MePC(40:4)	MePC	M+Na	874.63	14.288	C49 H90 O8 N1 P1 Na1	0.423701	1399.99	3959.76	156835	19069.6	0.0089265	-6.8077	0.000553535	0.00397777	4.07469e-06	4.07469e-06	4.07469e-06	11199.9	4.07469e-06	4.07469e-06	4.07469e-06	4.07469e-06	156081	152043	147419	126176	178674	141281	177173	175833
MePC(40:4e)	MePC	M+NH4	855.695	17.2375	C49 H96 O7 N2 P1	0.0496285	101824	15124	113808	48500	0.8947	-0.16053	1	1	83992.7	121487	113032	81067.9	100238	96593.5	119207	98976.3	67239.6	127251	180038	176986	65286.3	139712	76572.5	77383.3
MePC(40:5)	MePC	M+NH4	867.659	16.606	C49 H92 O8 N2 P1	0.142601	282519	61080.2	324344	32650.8	0.87105	-0.19918	0.127808	0.186204	260689	308342	368641	275121	333444	175530	308593	229789	347568	283994	375790	315604	337237	288844	346746	298973
MePC(40:5e)	MePC	M+Na	858.635	16.957	C49 H90 O7 N1 P1 Na1	0.171454	77950.2	17037.8	115532	26657.7	0.67471	-0.56767	0.0100817	0.023429	81781	66188.9	67794.3	105353	68177.7	60367.4	102095	71843.7	104937	134824	103679	157575	76498.4	131222	89168.7	126352
MePC(40:6)	MePC	M+Na	870.598	10.8729	C49 H86 O8 N1 P1 Na1	0.355697	11444.9	4402.19	122105	17893.3	0.09373	-3.4153	0.000939106	0.00397777	12142.9	8238.12	14272.1	12765.7	17027.6	8541.32	15040.1	3531.41	113914	116894	130949	150949	127764	89495.6	115137	131739
MePC(40:7)	MePC	M+NH4	863.627	14.0923	C49 H88 O8 N2 P1	0.287459	277082	155122	140924	69036.2	1.9662	0.9754	0.0405689	0.0719971	531203	292910	181513	285524	416151	205002	291223	13130.3	154029	53967.4	265255	143524	211423	92057.1	106271	100864
MePC(40:7e)	MePC	M+Na	854.603	16.5585	C49 H86 O7 N1 P1 Na1	0.0456907	91928.7	18897.3	100697	25718.3	0.91292	-0.13144	0.430897	0.508992	108561	94140.6	78138.6	78538.9	98777.6	68499.6	126095	82677.6	95465	65351.1	115480	146349	69498.1	109193	102839	101404
MePC(40:8)	MePC	M+NH4	861.612	4.71804	C49 H86 O8 N2 P1	0.0590337	4286.27	1450.08	783.898	768.862	5.4679	2.451	0.000930972	0.00397777	4991.98	2824.37	3389.15	4341.24	4438.59	2564.73	4590.88	7149.19	923.479	526.558	4.07469e-06	4.07469e-06	2421.1	965.991	941.569	492.496
MePC(40:8e)	MePC	M+NH4	847.632	17.648	C49 H88 O7 N2 P1	0.113793	44654.8	20491.7	67103.7	21872.3	0.66546	-0.58758	0.103562	0.156612	38737.2	53559.4	9495.47	41521.1	66286.8	29117.6	74144.4	44376.4	52399.6	40367	62947.8	72366.4	51102.2	96932.6	101281	59433
MePC(40:9)	MePC	M+NH4	859.596	12.8118	C49 H84 O8 N2 P1	0.615048	1.07026e+06	260378	1.56529e+06	347654	0.68374	-0.54848	0.0239487	0.0468347	858527	1.28455e+06	991000	709166	901270	1.03457e+06	1.4655e+06	1.31746e+06	1.98275e+06	1.20054e+06	1.43928e+06	1.66329e+06	1.83978e+06	1.20625e+06	1.98715e+06	1.20331e+06
MePC(40:9e)	MePC	M+NH4	845.617	14.214	C49 H86 O7 N2 P1	0.283751	4479.04	6247.46	81014.4	27553.6	0.055287	-4.1769	0.000785338	0.00397777	4.07469e-06	12139.6	4.07469e-06	10163	4.07469e-06	13529.7	4.07469e-06	4.07469e-06	97051.5	50183	126396	98987.2	51913.8	66899.3	96560.8	60124.1
MePC(41:1)	MePC	M+Na	894.692	17.64	C50 H98 O8 N1 P1 Na1	0.107398	355841	120208	398580	64407.5	0.89277	-0.16364	0.636502	0.703383	280102	411790	497957	443178	484500	214095	322713	192390	398015	387561	545651	346162	386790	339350	372317	412791
MePC(41:1e)	MePC	M+Na	880.713	17.9339	C50 H100 O7 N1 P1 Na1	0.0762761	21840.1	5695.74	13182.8	7396.06	1.6567	0.72832	0.018129	0.0375566	21636.3	31187.8	18227.1	28605	22816.2	15341.3	21167.3	15739.9	6470.71	7873.01	11952.7	29400.4	12606.5	10642.4	8879.88	17637.1
MePC(41:2)	MePC	M+Na	892.677	16.504	C50 H96 O8 N1 P1 Na1	0.330954	601382	128099	757979	94004.1	0.7934	-0.33388	0.0520296	0.0879514	479013	668613	781223	694334	707070	441024	565831	473944	869579	666298	897682	801814	752135	648800	670783	756739
MePC(41:2e)	MePC	M+Na	878.697	17.191	C50 H98 O7 N1 P1 Na1	0.303315	287199	61609.3	183064	29817.8	1.5688	0.6497	0.00194753	0.00637467	257658	279275	328657	400682	265610	211426	325241	229041	165928	178481	203843	220726	159611	163695	146647	225579
MePC(41:3)	MePC	M+Na	890.661	15.7793	C50 H94 O8 N1 P1 Na1	0.457806	195290	51654.4	409057	91930.8	0.47741	-1.0667	0.00135938	0.00497765	184960	195508	146284	228666	189362	141120	303022	173399	456399	300669	483568	428872	380453	348122	565857	308519
MePC(41:3e)	MePC	M+Na	876.682	16.915	C50 H96 O7 N1 P1 Na1	0.0317687	153504	28957.3	160472	30776.6	0.95657	-0.064053	0.636502	0.703383	141207	156455	136091	211906	141289	131987	180828	128266	141062	160110	193118	201636	121645	143364	132343	190502
MePC(41:4)	MePC	M+Na	888.645	14.4728	C50 H92 O8 N1 P1 Na1	0.359425	28455.6	12783.3	156992	56618.8	0.18125	-2.4639	0.000939106	0.00397777	11942.2	14576.5	49216.2	21851.6	31294.3	38448.1	36875.5	23440	182274	128035	181639	135127	169112	108015	267022	84712.3
MePC(41:4e)	MePC	M+Na	874.666	15.6575	C50 H94 O7 N1 P1 Na1	0.467961	850709	156181	1.17768e+06	318085	0.72236	-0.46921	0.018129	0.0375566	695505	756313	825601	1.17275e+06	796550	964703	873736	720512	1.23423e+06	1.001e+06	1.86314e+06	1.06441e+06	754745	1.19204e+06	1.08138e+06	1.23046e+06
MePC(41:5)	MePC	M+Na	886.63	13.4699	C50 H90 O8 N1 P1 Na1	0.558836	530462	66258.1	239878	67939	2.2114	1.145	0.000939106	0.00397777	397714	575883	583465	471050	523046	542460	558703	591374	183555	241557	267686	207221	258689	208980	383891	167442
MePC(41:5e)	MePC	M+Na	872.65	17.688	C50 H92 O7 N1 P1 Na1	0.00359492	13097.5	7972.86	13461.3	4308.2	0.97297	-0.039533	0.372029	0.452003	15361.4	5625.37	3956.67	10291.9	13196	10854.2	29864.3	15629.8	16119.6	4844.77	16286.5	13302.3	13595.7	9695.74	18028.1	15817.9
MePC(41:6)	MePC	M+Na	884.614	12.4265	C50 H88 O8 N1 P1 Na1	0.0785209	284590	64035.6	259035	65681.3	1.0987	0.13574	0.372029	0.452003	211874	280408	248396	304557	358986	231311	393821	247371	270943	224004	245821	237529	260159	231362	410464	191995
MePC(41:7)	MePC	M+Na	882.598	11.9385	C50 H86 O8 N1 P1 Na1	1.05029	6.26299e+06	1.47047e+06	4.48799e+06	1.55764e+06	1.3955	0.48078	0.0520296	0.0879514	5.9637e+06	5.8399e+06	4.78201e+06	6.8077e+06	7.74594e+06	4.85176e+06	8.91756e+06	5.19534e+06	5.03455e+06	3.0152e+06	5.08492e+06	3.41759e+06	5.34351e+06	3.21216e+06	7.51907e+06	3.27695e+06
MePC(42:0e)	MePC	M+Na	896.744	18.4999	C51 H104 O7 N1 P1 Na1	0.264103	551158	56562	654218	94301.2	0.84247	-0.24731	0.0239487	0.0468347	585325	644714	521163	554125	607890	504601	499848	491597	661242	450368	721595	731964	589729	721543	669297	688009
MePC(42:1)	MePC	M+NH4	903.752	19.68	C51 H104 O8 N2 P1	0.0275501	47150	76079	38968	16321.5	1.21	0.27497	0.189263	0.257782	39191.2	9248.28	26638.7	15587.3	13164.4	27475.1	12117.1	233778	37060.8	36783.1	56822	8475.64	53169.1	36490.8	27553	55389.7
MePC(42:11)	MePC	M+NH4	883.596	11.6457	C51 H84 O8 N2 P1	0.530657	549019	369340	132915	246458	4.1306	2.0464	0.0235359	0.0468347	557951	593271	629234	4.07469e-06	981713	13529.8	943579	672874	4.07469e-06	560062	96.5722	4.07469e-06	54.568	130.218	129.311	502844
MePC(42:2)	MePC	M+Na	906.692	17.092	C51 H98 O8 N1 P1 Na1	0.159475	12166.5	5293.36	36678	8109.72	0.33171	-1.592	0.000939106	0.00397777	7325.99	13684.6	6660.82	16735.6	21289.5	6294.61	13376.4	11964.4	42118.2	34036.8	49510.8	28413.1	37032.5	26082.9	32019.7	44209.9
MePC(42:5)	MePC	M+NH4	895.69	16.62	C51 H96 O8 N2 P1	0.132925	55261.7	22289.2	81285.1	16332.8	0.67985	-0.55671	0.0520296	0.0879514	34640.9	69818.2	83830.7	41433.1	81412.3	47621.9	60660	22676.7	81099.7	66236.9	99435.2	105871	72273.5	57558.2	88856.7	78949.6
MePC(42:6)	MePC	M+NH4	893.674	16.515	C51 H94 O8 N2 P1	0.21796	323769	66859.3	398640	56845.5	0.81218	-0.30012	0.0660819	0.107911	280581	360354	407896	353027	396870	232586	315207	243629	462862	333324	482615	417249	394912	340507	342407	415241
MePC(42:7)	MePC	M+NH4	891.659	17.2921	C51 H92 O8 N2 P1	0.0972657	46480.6	9814.2	60666.7	11961.8	0.76616	-0.38428	0.0239487	0.0468347	36612.9	50924.9	36328	44033.5	65483	38556.3	49810.8	50095.2	69377.2	38260.8	72224.9	59592.6	65216.6	54243.1	73554.6	52863.8
MePC(42:8)	MePC	M+Na	894.598	10.5031	C51 H86 O8 N1 P1 Na1	0.504151	422.971	595.691	222679	36820.2	0.0018995	-9.0402	0.000939106	0.00397777	180.418	242.248	0.260936	1754.52	810.675	126.669	268.975	4.07469e-06	256454	183395	268037	256794	198578	181712	243590	192871
MePC(42:8e)	MePC	M+Na	880.619	16.977	C51 H88 O7 N1 P1 Na1	0.0622946	5171.54	1943.53	10638.1	5058.74	0.48613	-1.0406	0.0520296	0.0879514	6386.18	5424.55	1482	5752.27	3262.19	5168.24	7652.5	6244.42	6797.88	12530.9	10657	16930.2	4507.66	12646.9	4209.69	16824.7
MePC(42:9e)	MePC	M+NH4	873.648	15.437	C51 H90 O7 N2 P1	0.31168	2464.6	4479.84	91048.3	24622.7	0.027069	-5.2072	0.000859897	0.00397777	4.07469e-06	12983.7	4.07469e-06	4.07469e-06	4.07469e-06	1530.18	4122.06	1080.87	90004.7	86699.6	131296	102920	46610.7	95893.7	72656.4	102305
MePC(43:2)	MePC	M+Na	920.708	17.9224	C52 H100 O8 N1 P1 Na1	0.0682561	16439	5402.1	23851.7	6954.44	0.68922	-0.53697	0.0520296	0.0879514	13782.5	16231.4	22192.6	16074.1	20223.3	7782.81	23610.1	11615.5	29827	14579.7	34845.5	19003.1	24804.6	17208.9	28695.2	21849.8
MePC(43:2e)	MePC	M+Na	906.729	17.817	C52 H102 O7 N1 P1 Na1	0.142794	27443	10771	5949.68	4693.02	4.6125	2.2056	0.0027616	0.00834568	27395.2	24468.4	28502.2	26257	38163.5	23580.8	43809	7367.58	8352.53	2657.87	1319.76	11300.1	6015.4	3636.13	864.079	13451.6
MePC(43:3)	MePC	M+Na	918.692	16.5076	C52 H98 O8 N1 P1 Na1	0.197064	61218.1	13864.7	100978	14222.6	0.60625	-0.72201	0.00135938	0.00497765	46546.8	61393	85580.6	62544.8	72434.3	58293.7	61743.9	41207.8	119674	103965	94532.2	120400	77508.9	101339	91954.9	98448.7
MePC(43:3e)	MePC	M+Na	904.713	17.16	C52 H100 O7 N1 P1 Na1	0.0328481	17168.5	8285.6	13596.6	5793.52	1.2627	0.33652	0.494837	0.568203	15595.9	10988.5	31653.8	19304.2	16164.7	10319.8	26070	7250.89	12569.2	11103	22563.7	14450.4	8694.85	19746.9	4521.39	15123
MePC(43:4e)	MePC	M+NH4	897.742	18.559	C52 H102 O7 N2 P1	0.183247	177616	46661	126369	33359	1.4055	0.49112	0.0313241	0.0589837	125737	215587	208264	168116	138916	249665	121506	193137	112406	145239	95424.8	175829	111005	172273	95170.1	103604
MePC(43:5)	MePC	M+Na	914.661	15.0164	C52 H94 O8 N1 P1 Na1	0.391204	5763.18	6521.4	139156	19417.4	0.041415	-4.5937	0.000906857	0.00397777	0.0354864	11405.6	8423.27	4.07469e-06	4.07469e-06	4.07469e-06	16066.3	10210.2	133283	129699	153348	158787	106908	121254	160777	149189
MePC(43:5e)	MePC	M+Na	900.682	15.762	C52 H96 O7 N1 P1 Na1	0.159523	15671.2	9552.49	44741.3	17016.3	0.35026	-1.5135	0.00387604	0.0109285	6838.05	10740.8	28525.3	7588.16	9692.49	15750.7	32039.5	14194.7	46735.2	57091.3	52326	68941.9	19579.4	20502.7	45600.7	47153.2
MePC(43:7)	MePC	M+Na	910.63	5.158	C52 H90 O8 N1 P1 Na1	0.0434019	4186.3	3935.74	7564.01	2592.32	0.55345	-0.85348	0.0831229	0.13017	5928.74	2022.61	3938.3	1884.48	537.474	348.853	6901.53	11928.4	5978.55	5754.61	7633.86	3817.9	6288.05	11093.9	9099.69	10845.6
MePC(44:12)	MePC	M+Na	914.567	6.039	C53 H82 O8 N1 P1 Na1	0.00417774	5323.14	2006.09	5032.47	3778.95	1.0578	0.081011	0.792896	0.837939	4194.09	3752.16	6217.2	5811.17	7814.46	4760.71	7905.65	2129.69	1365.96	294.376	6439.6	4864.29	2979.41	7244.82	4766.83	12304.5
MePC(45:3)	MePC	M+Na	946.724	18.132	C54 H102 O8 N1 P1 Na1	0.128309	6427.09	2697.74	24320.6	10295.3	0.26427	-1.9199	0.00387604	0.0109285	7635.82	6649.52	4821.29	9737.28	7931.47	2728.38	9079.91	2833.08	26462.4	17080.9	38472.8	7419.07	29354.5	14947.3	28010	32817.8
MePC(47:2)	MePC	M+Na	976.77	18.994	C56 H108 O8 N1 P1 Na1	0.0561522	8720.2	8299.64	15638.3	9176.92	0.55762	-0.84265	0.189263	0.257782	23026.6	9976.02	979.946	8592.7	6721.21	2127.02	18338.1	0.0255064	16466.7	3562.3	25673	4.07469e-06	23846.3	19184.4	16636.4	19737.1
MePC(48:6)	MePC	M+Na	982.724	17.047	C57 H102 O8 N1 P1 Na1	0.133089	92210.1	55161.4	50293.4	60496	1.8334	0.87456	0.713191	0.769972	144088	8533.08	117065	120365	126624	102834	116982	1188.59	11939.6	14320.2	145343	17651.8	150862	17559.3	20850.3	23820.1
MePC(49:2)	MePC	M+Na	1004.8	19.5829	C58 H112 O8 N1 P1 Na1	0.0019517	61450.1	40122.3	61970.4	48438.5	0.9916	-0.012164	0.874826	0.905144	113150	42941.2	24433.5	76025.5	96649.3	22126.9	102087	14187.2	82518.8	28406.8	164536	15016.4	65812.9	15915.1	59036.2	64521.5
MePC(49:6)	MePC	M+Na	996.739	15.942	C58 H104 O8 N1 P1 Na1	0.148883	18536.8	33361.7	73369	107602	0.25265	-1.9848	0.0984723	0.153557	4.07469e-06	9299.44	11457	4.07469e-06	96853.9	4.07469e-06	30684.2	4.07469e-06	44736.5	49671.9	5513.03	319203	12853.1	130156	24818.1	4.07469e-06
MePC(51:2)	MePC	M+Na	1032.83	20.05	C60 H116 O8 N1 P1 Na1	0.140723	361819	191873	286785	152558	1.2616	0.3353	0.430897	0.508992	561365	339225	196198	445684	587900	164443	506228	93509.5	371977	132374	559370	124418	347102	133997	350235	274808
MePC(51:4)	MePC	M+Na	1028.8	19.3628	C60 H112 O8 N1 P1 Na1	0.332075	120376	69933	282032	155440	0.42682	-1.2283	0.0520296	0.0879514	211168	122760	38318.9	114951	151543	59562.2	216810	47893.6	384333	96319.3	533457	110742	328950	128966	335544	337947
MePC(52:6)	MePC	M+NH4	1033.83	20.038	C61 H114 O8 N2 P1	0.0970531	230881	121647	189931	95214.1	1.2156	0.28167	0.430897	0.508992	386506	226982	106969	257086	366474	109421	314808	78799.6	249178	81517.1	362271	83219.2	215034	117445	224697	186089
MePC(52:7)	MePC	M+NH4	1031.82	19.721	C61 H112 O8 N2 P1	0.05429	7884	9596.92	15958.7	15934.8	0.49402	-1.0173	0.244497	0.323838	7575.93	4070.66	4.07469e-06	5992.19	22661.2	4.07469e-06	22772.1	4.07469e-06	9781.95	4.07469e-06	23201.9	2794.97	32227.5	11023.7	44691.4	3948.49
MePC(53:2)	MePC	M+Na	1060.86	20.4613	C62 H120 O8 N1 P1 Na1	0.0757799	83482.9	62382.2	105885	42470.9	0.78843	-0.34295	0.563524	0.634285	106952	61040.1	33041.8	111241	147420	30038.9	178129	4.07469e-06	140232	56783.4	167732	60446.8	101728	68887.9	103504	147769
MePC(53:4)	MePC	M+Na	1056.83	19.8808	C62 H116 O8 N1 P1 Na1	0.641172	969745	605196	1.72601e+06	907079	0.56184	-0.83176	0.0831229	0.13017	1.5002e+06	746174	339033	1.15769e+06	1.43113e+06	412974	1.87587e+06	294893	2.20803e+06	736143	3.30164e+06	648750	1.55315e+06	1.04822e+06	2.30625e+06	2.00585e+06
MePC(53:5)	MePC	M+Na	1054.82	19.3698	C62 H114 O8 N1 P1 Na1	0.164363	31462.1	18889.8	79449.6	63388.1	0.396	-1.3364	0.0239487	0.0468347	41731.3	26695.3	5148.97	53383.9	42154.9	18512.5	53411.9	10657.9	73908.2	12141.7	222438	43902.9	67026	48017.1	102396	65767.1
MePC(53:7)	MePC	M+Na	1050.79	17.9961	C62 H110 O8 N1 P1 Na1	0.00305496	15987.4	5490.26	15704.9	5201.56	1.018	0.025718	0.874826	0.905144	21336.2	15973.4	13554.2	25409.4	14780	11961.1	17180.3	7704.57	13884.5	14221.3	24677.7	8363.63	21509.8	13441.9	12659.9	16880.7
MePC(54:4)	MePC	M+Na	1070.85	20.119	C63 H118 O8 N1 P1 Na1	0.189862	86841.2	66792.3	152885	67181.9	0.56802	-0.81599	0.0660819	0.107911	130003	52665.8	35689.3	94813.3	158554	22765.3	189329	10910.6	194894	79288.1	245713	67448.8	176782	82970	204906	171077
MePC(55:4)	MePC	M+Na	1084.86	20.337	C64 H120 O8 N1 P1 Na1	0.521776	215336	187377	595159	319957	0.36181	-1.4667	0.0239487	0.0468347	325731	149558	25187.8	221941	420802	39139.9	508684	31640.5	865399	194287	988028	226404	562212	291354	795283	838306
MePC(55:5)	MePC	M+Na	1082.85	19.9004	C64 H118 O8 N1 P1 Na1	0.124852	5818.75	8892.94	31054.2	29397.2	0.18737	-2.416	0.0621105	0.104801	3959.59	4.07469e-06	4.07469e-06	8980.23	7768.84	4.07469e-06	25841.4	4.07469e-06	48466.2	6190.05	82962	4.07469e-06	15725.3	3097.26	47743.4	44249.1
MePC(55:6)	MePC	M+Na	1080.83	19.3362	C64 H116 O8 N1 P1 Na1	0.0386398	18984.5	17882.6	25485.1	16837.7	0.74492	-0.42484	0.493563	0.568203	27357.2	24012.4	4.07469e-06	12808.8	32072.4	4823.08	50801.7	4.07469e-06	41066.4	4.07469e-06	43805.9	16053.4	31634.7	6242.21	41485.3	23593.3
MePC(55:7)	MePC	M+Na	1078.82	18.8847	C64 H114 O8 N1 P1 Na1	0.188425	53062.3	25143.8	102379	40662.6	0.51829	-0.94817	0.0520296	0.0879514	83231	59348.9	21814.3	67269.4	54254.8	30363.9	83929.9	24286.1	150337	53462.1	137620	46941.6	129686	66216.6	111807	122964
PA(18:0e)	PA	M+Na	461.264	5.28453	C21 H43 O7 N0 P1 Na1	0.0673706	212011	59976.6	230310	21777.5	0.92055	-0.11944	0.494837	0.568203	219595	252249	217746	126538	309545	248479	153505	168429	250459	179454	242396	238749	229868	240800	230385	230366
PA(18:1e)	PA	M+Na	459.248	3.67544	C21 H41 O7 N0 P1 Na1	0.0655215	56966	18873.2	46864.9	5281.07	1.2155	0.28159	0.372029	0.452003	73478.6	38774.5	48482.8	78455.7	73768.1	44298.9	69155.7	29313.6	48004.3	50794.2	43094.8	47733.7	39341.8	48119.5	41953.6	55877.7
PC(14:1e)	PC	M+H	466.293	2.99614	C22 H45 O7 N1 P1	0.132468	32178.6	11069.6	53287.5	11306.8	0.60387	-0.7277	0.0027616	0.00834568	41720.4	21408.8	29632.7	46882.5	41640.1	26271	34904.6	14968.7	45997.7	52930.1	49482.3	59647.7	42239.2	53841.1	44606.1	77556.1
PC(15:1)	PC	M+H	494.288	3.383	C23 H45 O8 N1 P1	0.00304715	5583.72	3079.18	5783.16	2206.64	0.96551	-0.050632	0.494837	0.568203	3215.72	7375.4	3016.34	12379.8	4051.7	5467.05	4131.45	5032.33	5478.58	7936.73	7915.77	5683.02	8707.74	3531.39	4139.28	2872.81
PC(16:0)	PC	M+H	510.319	1.88425	C24 H49 O8 N1 P1	0.030982	8186.86	4806.89	11043	5366.16	0.74136	-0.43175	0.189263	0.257782	7147.38	6607.42	6051.97	8670.56	9515.3	5418.85	19030.7	3052.65	22572.4	5068.76	11917.7	6777.23	11186.3	8406.65	13073.4	9341.25
PC(8:0e_8:0)	PC	M+H	496.34	7.55	C24 H51 O7 N1 P1	0.0177948	12212.1	15294	9816.51	4478.83	1.244	0.31503	0.318425	0.399191	6554.22	3502.77	2073.99	31629.5	41313	3923.02	6637.03	2063.11	11918	10904.7	12531.8	16709.3	7941.92	11006.8	2855.22	4664.31
PC(6:0_10:1)	PC	M+Na	530.285	2.59961	C24 H46 O8 N1 P1 Na1	0.253789	162805	27920.4	96954.4	17102.8	1.6792	0.74776	0.000939106	0.00397777	150528	192381	189486	202278	141710	147145	153251	125659	116498	116398	97308.9	104936	63550.1	94951	95049.3	86943.9
PC(16:1)	PC	M+H	508.303	3.773	C24 H47 O8 N1 P1	0.0132475	5050.52	3767.91	6057.29	3368.93	0.83379	-0.26224	0.563524	0.634285	763.892	10417.9	7750.51	2890.58	3514.28	7386.8	4.07469e-06	7680.15	11049.5	3491.36	9452.8	3554.87	2486.92	2761.33	7478.38	8183.13
PC(16:2)	PC	M+H	506.288	2.762	C24 H45 O8 N1 P1	0.14532	11684.3	3817.64	32807	8948.49	0.35615	-1.4894	0.000939106	0.00397777	4004.77	9765.95	10626.9	13652.2	14908.8	11148.3	16371.6	12995.4	40559.7	32155.4	25125.2	41571.7	18796.9	41545	24744.5	37957.7
PC(8:0e_9:0)	PC	M+Na	532.337	4.08	C25 H52 O7 N1 P1 Na1	0.630792	345291	162308	770233	178259	0.44829	-1.1575	0.000939106	0.00397777	506502	292144	212058	458551	485363	210110	502265	95332.9	693971	861052	933863	1.01912e+06	591555	616936	549907	895459
PC(17:1)	PC	M+H	522.319	5.156	C25 H49 O8 N1 P1	0.0208202	9196	3333.05	7561.48	4136.96	1.2162	0.28234	0.189263	0.257782	10156.5	9495.66	5978.6	10073.7	6272.24	9594.65	16019.6	5977.09	12833.4	5279.3	13785	5664.21	5011.89	2253.64	5635.95	10028.4
PC(18:0)	PC	M+H	538.35	3.76191	C26 H53 O8 N1 P1	0.00718985	78963.7	19442.1	77783.4	13783.1	1.0152	0.021727	0.874826	0.905144	62130.6	72229.2	67450.6	87322.9	94418.1	49324.2	90450	108384	66261.1	74773.4	81222	96973.1	59520.5	92608	86494.9	64414.2
PC(12:0e_6:0)	PC	M+Na	546.353	6.064	C26 H54 O7 N1 P1 Na1	0.426366	344924	213982	100969	64397	3.4161	1.7724	0.0239487	0.0468347	513192	329216	221822	434251	479641	53328.8	651132	76812.7	195351	87910.8	15197.2	148393	139639	47210.2	34252.3	139802
PC(10:0e_8:0)	PC	M+Na	546.353	8.83089	C26 H54 O7 N1 P1 Na1	0.0421361	12708.8	4517.97	9490.61	565.823	1.3391	0.42125	0.0660819	0.107911	18007.8	13177.4	10485.9	15942.9	16846.7	9154.16	13628.1	4427.38	8808.15	9278.18	9590.96	8838.74	10077.4	10370.8	9776.99	9183.68
PC(18:1)	PC	M+H	536.335	1.29329	C26 H51 O8 N1 P1	0.146589	12423.6	3942.58	34627.7	10724.6	0.35878	-1.4788	0.00194753	0.00637467	15488.2	8632.94	8104.36	11368.3	17926.7	10683.8	17415.7	9769.17	16977	37673.1	41933.4	32566.1	24820.9	37776.5	32832.9	52442.2
PC(18:2)	PC	M+H	534.319	1.68068	C26 H49 O8 N1 P1	0.155788	10862	8209.74	37455.1	13909.4	0.29	-1.7859	0.0027616	0.00834568	17317	7337.71	2731.55	7309.06	13900.4	5535.88	27346.7	5417.84	53070.4	21840.4	42781.2	26397.8	41419.3	24302.8	59337.3	30491.7
PC(18:4)	PC	M+H	530.288	2.60396	C26 H45 O8 N1 P1	0.248638	164354	30265.4	99126.8	19035.8	1.658	0.72946	0.000939106	0.00397777	139255	186198	198163	211105	143078	150140	158402	128493	116532	123251	101552	110503	61819.1	95026.8	94484	89847.5
PC(19:0)	PC	M+H	552.366	4.30449	C27 H55 O8 N1 P1	0.100341	12379.1	3994.89	22922.7	3999.5	0.54004	-0.88887	0.0027616	0.00834568	9711.87	9066.88	7671.23	11793.5	17830.8	13635.2	18496	10827.6	24982.6	18481.6	25095.8	26418.9	23760.4	22482.4	26708.9	15450.8
PC(19:1)	PC	M+H	550.35	3.55773	C27 H53 O8 N1 P1	0.113036	23469.1	21054.7	44409.2	15118.2	0.52847	-0.9201	0.0313241	0.0589837	8446.95	10786.8	71736.4	15180.2	11485.3	30808.1	12887.7	26421.5	45528.8	48346.2	30633.8	54998.5	23154.4	71197.3	47207.2	34207.7
PC(19:2)	PC	M+H	548.335	2.58645	C27 H51 O8 N1 P1	0.2511	26053.7	7415.91	84418.3	16868	0.30863	-1.6961	0.000939106	0.00397777	13006.5	30237.3	26137.6	31314.4	22643.8	25195.6	37912	21982.5	80744.6	100203	68708.3	105316	53562.1	91012	84314.3	91486.3
PC(19:2e)	PC	M+H	534.355	2.88274	C27 H53 O7 N1 P1	0.0531325	38426.9	14576.7	31273.8	3945.69	1.2287	0.29716	0.318425	0.399191	50688.8	43088.5	25556.9	42456	48464.7	26908.6	56080.5	14171.2	30310.8	29657.7	31172.8	39457	32128.2	25139.7	31366.3	30957.5
PC(19:3e)	PC	M+H	532.34	4.64768	C27 H51 O7 N1 P1	0.166097	13310.4	7199.85	39634.4	6805.53	0.33583	-1.5742	0.000939106	0.00397777	16840.3	13523.9	6123.87	16823.6	22068.7	8983.77	20567.8	1551.46	34065.2	40969.6	42991.3	39689.8	36678.8	29122.8	41356	52202
PC(19:4e)	PC	M+H	530.324	3.31676	C27 H49 O7 N1 P1	0.532567	473377	147463	181196	20678	2.6125	1.3854	0.000939106	0.00397777	628451	437925	384937	566090	643514	369822	540441	215838	204890	143672	164816	175384	193542	188899	203007	175362
PC(19:5e)	PC	M+H	528.308	2.53798	C27 H47 O7 N1 P1	0.0126135	633290	185499	639326	81460.3	0.99056	-0.013685	0.713191	0.769972	588693	681713	620100	851656	797185	502281	752553	272142	747995	566916	523633	666888	574441	744062	644343	646330
PC(20:0)	PC	M+H	566.382	5.63002	C28 H57 O8 N1 P1	0.0463343	24714.8	7218.42	19933.8	4859.93	1.2398	0.31016	0.189263	0.257782	26325	23746	21587.8	34537.7	29026.9	12633.3	31649.8	18211.7	23897.3	15427.8	21948.5	28880.5	13730.9	18449.4	19202.1	17933.6
PC(14:0e_6:0)	PC	M+Na	574.384	6.74134	C28 H58 O7 N1 P1 Na1	0.133867	7539.78	5313.6	45395	64507.2	0.16609	-2.5899	0.103562	0.156612	7439.4	8657.51	2823.26	11939.2	7941.11	2353.19	17308.1	1856.49	613.071	7792.57	15504.5	165520	131489	10238.8	18139.4	13862.3
PC(20:1)	PC	M+H	564.366	3.75086	C28 H55 O8 N1 P1	0.0532686	42299.4	14071.6	34702.6	9643.81	1.2189	0.2856	0.127808	0.186204	37649.1	38714.7	40699.2	71877.1	39696.8	23367.6	50523.4	35867.6	34686.7	32257.2	34807.6	48644.7	21134.8	25354.8	47950.3	32784.6
PC(20:2)	PC	M+H	562.35	2.75553	C28 H53 O8 N1 P1	0.149126	24381.7	9403.21	52102.8	20190.3	0.46795	-1.0956	0.00387604	0.0109285	20431.6	16468.8	24844.4	42498.5	23083.3	11336.6	25813.1	30577.2	51886.4	41038.8	46719.1	94772.8	27271.3	41702.4	49164.3	64266.7
PC(20:3)	PC	M+H	560.335	1.63284	C28 H51 O8 N1 P1	0.0827905	27510.5	10981.8	16791.3	5817.22	1.6384	0.71227	0.0405689	0.0719971	27652.1	36229.9	33354.9	28792.4	39105.2	6236.28	32276.2	16437.5	16414.6	11564.2	16764.3	16759	23263.5	8670.39	14329.5	26564.5
PC(20:4)	PC	M+H	558.319	3.608	C28 H49 O8 N1 P1	0.193595	52120.3	9257.67	17616.5	4924.3	2.9586	1.5649	0.000939106	0.00397777	58197.1	65539.2	43734	59206.5	52747.5	40357.5	55615.9	41564.8	22483.2	13769.3	8944.85	22449.2	16182.6	18744.6	22678.5	15679.8
PC(21:0)	PC	M+H	580.397	6.33038	C29 H59 O8 N1 P1	0.0570675	6083.22	1595.61	9765.03	1810.4	0.62296	-0.68279	0.00740553	0.0183503	4386.56	6842.61	4220.37	6794.8	8042.49	7369.42	6958.63	4050.87	10620.9	6642.44	11003.2	11324.4	10479.1	8515.39	11559.5	7975.27
PC(21:0e)	PC	M+H	566.418	7.88838	C29 H61 O7 N1 P1	0.150886	4729.43	2375.41	25212.3	4537.82	0.18758	-2.4144	0.000939106	0.00397777	6766.78	3746.25	3318.28	6340.11	6083.58	3143.08	7748.75	688.604	27061.4	18926.6	31990.9	28038.7	20593.3	21844.8	24315.8	28926.6
PC(21:1e)	PC	M+H	564.402	5.74885	C29 H59 O7 N1 P1	0.115271	5131.62	2431.59	17344	2744.78	0.29587	-1.7569	0.000939106	0.00397777	6778.42	3308.3	2956.68	7166.43	6930.11	2685.09	8511.89	2716.05	16705.1	17428.1	20473.5	20837.3	12997.8	15376.3	15526.1	19407.5
PC(21:3e)	PC	M+H	560.371	7.164	C29 H55 O7 N1 P1	0.142956	4108.66	1603.29	23153.1	6071.24	0.17746	-2.4945	0.000939106	0.00397777	4160.34	3573.31	4563.55	4654.55	5203.19	2818.2	6620.6	1275.56	21996.5	14614.6	27120.1	26711.2	16490.1	21059.9	23773.4	33459.3
PC(21:4)	PC	M+H	572.335	2.48989	C29 H51 O8 N1 P1	0.165948	138188	17733.8	106060	13998.8	1.3029	0.38175	0.0027616	0.00834568	135964	130834	113634	129027	139132	129059	159113	168741	114716	95700	108522	87270.1	94920.6	127945	119724	99685.8
PC(21:5e)	PC	M+H	556.34	2.87	C29 H51 O7 N1 P1	0.055438	8205.48	3128.92	4219.49	1435.96	1.9447	0.95952	0.0100817	0.023429	8570.71	8328.93	7117	14223.4	8653.78	8204.92	7877.93	2667.11	4178.17	4467.06	2364.77	3545.2	2698.09	4037.09	6337.01	6128.5
PC(22:0)	PC	M+Na	616.395	7.10336	C30 H60 O8 N1 P1 Na1	0.0731809	14497	4640.63	8077.65	1135.21	1.7947	0.84375	0.0135873	0.0294907	11779.2	17882.2	16658.3	12244.3	18115.8	20371.1	12916.9	6008.31	7749.66	6381.93	8965.69	9993.92	8421.32	7219.31	8530.77	7358.62
PC(4:0_18:1)	PC	M+H	592.397	4.27081	C30 H59 O8 N1 P1	0.0543058	4481.25	2095.58	8073.97	1798.89	0.55502	-0.84938	0.00740553	0.0183503	3154.86	4629.89	3040.06	5058.63	6068.09	2925.3	8616.11	2357.03	7219.8	5408.11	6791.87	9586.41	7432.1	11232.8	8147.55	8773.14
PC(22:4)	PC	M+H	586.35	2.63034	C30 H53 O8 N1 P1	0.185398	95022.3	52170.6	44105	15888.1	2.1545	1.1073	0.00387604	0.0109285	73482.9	99600	92594.7	217816	74694.9	50309.1	88780.8	62899.8	46316	37450.3	40820.3	44034.8	37329.7	27156.5	80807.3	38925.4
PC(23:0e)	PC	M+H	594.449	9.77303	C31 H65 O7 N1 P1	0.171259	16735.4	3587.45	43804	7565.37	0.38205	-1.3882	0.000939106	0.00397777	17490.6	15640.5	13621.4	17645.9	20653.5	14000.8	22613.3	12217.2	47420.2	39939.7	57261.8	44767	36657.4	32974.5	42966.2	48445.1
PC(23:1e)	PC	M+H	592.434	8.14708	C31 H63 O7 N1 P1	0.0975111	5479.04	2058.83	14471.6	2490.13	0.37861	-1.4012	0.000939106	0.00397777	7738.56	5297.58	3862.28	6199	6511.71	3432.33	8235.44	2555.38	16659.3	13888.7	17619.5	16997.8	11299.1	11335.3	13087.1	14885.8
PC(23:4)	PC	M+H	600.366	3.40483	C31 H55 O8 N1 P1	0.206865	59858.1	18469.1	16783.6	8425.99	3.5665	1.8345	0.000939106	0.00397777	42333.2	70567.1	59365.8	41971.1	73720.1	52276.2	93985.7	44645.4	23259.8	15335.6	10850.8	15296.2	12079.9	31642.1	21343.5	4461.27
PC(23:5e)	PC	M+H	584.371	2.85177	C31 H55 O7 N1 P1	0.112614	655.439	1036.87	11741.9	1502.63	0.055821	-4.1631	0.000859897	0.00397777	1583.06	4.07469e-06	267.372	2842.93	4.07469e-06	4.07469e-06	550.149	4.07469e-06	12035.5	10796.1	10894.6	14329.9	11387.1	13627.8	10047.8	10816.3
PC(24:0)	PC	M+H	622.444	8.17575	C32 H65 O8 N1 P1	0.0134398	24133.5	6285.38	25634.2	8996.53	0.94146	-0.087029	0.494837	0.568203	21119	28109.3	25176.7	22739.3	30380.8	25407.5	29419.4	10716.3	25036	19161.3	28041.7	46375.2	23364.4	24593.6	18709.9	19791.2
PC(24:3e)	PC	M+H	602.418	8.92879	C32 H61 O7 N1 P1	0.131218	14053.7	3489.38	30543	5268.62	0.46013	-1.1199	0.000939106	0.00397777	19561.9	17007.6	11892.4	14310.7	16105.6	13207.8	11955.9	8388.01	20795.2	26451.6	37502.9	29826.8	34033.4	28788.7	34237.2	32708.1
PC(24:4)	PC	M+H	614.382	3.652	C32 H57 O8 N1 P1	0.0682878	5991.11	4392.71	285.105	528.119	21.014	4.3933	0.00146734	0.00535181	3263.43	4071.38	5298.9	13487.4	6859.74	730.903	11371.7	2845.33	1112.68	4.07469e-06	1168.16	4.07469e-06	4.07469e-06	4.07469e-06	4.07469e-06	4.07469e-06
PC(24:4e)	PC	M+H	600.402	4.41469	C32 H59 O7 N1 P1	0.0471817	16712.8	5014.96	12727.7	2373.41	1.3131	0.39298	0.0520296	0.0879514	19376.7	16831.8	16629	19639.4	21401.3	11703.6	21103.6	7016.8	15482.2	13008.9	10173.6	14787.4	14665.9	8801.43	13366.1	11536.4
PC(24:5)	PC	M+H	612.366	2.74427	C32 H55 O8 N1 P1	0.0253661	12532.3	7612.26	9923.97	5072.79	1.2628	0.33667	0.494837	0.568203	6610.09	9235.34	12500.4	27343.8	17417.9	3146.35	15729.2	8275.79	15527.9	2763.75	11178.9	10773.2	7332.37	7149.32	18212.8	6453.52
PC(24:5e)	PC	M+H	598.387	3.66535	C32 H57 O7 N1 P1	0.225827	259065	114079	169973	37717.5	1.5241	0.608	0.127808	0.186204	334921	242086	154260	348348	340575	149988	405173	97168.4	189999	157939	146260	153360	208873	125559	235653	142144
PC(26:0)	PC	M+H	650.476	9.60461	C34 H69 O8 N1 P1	0.00739328	25527.1	5267.87	26163.3	3869.6	0.97568	-0.035517	0.713191	0.769972	24412.5	26083.5	23668	26606.3	36290.2	20818.7	27581.6	18756.1	28592.1	19865	28854.1	25439	24360.8	23859.2	32694.4	25642.1
PC(28:0)	PC	M+H	678.507	11.1007	C36 H73 O8 N1 P1	0.281015	400970	59132.1	302338	53198.9	1.3262	0.40733	0.0135873	0.0294907	405125	420470	354554	390901	535368	353105	377791	370447	258431	259967	285348	272575	328469	254642	381299	377973
PC(28:1)	PC	M+H	676.491	10.046	C36 H71 O8 N1 P1	0.110741	18891.2	4374.72	32264.2	6724.94	0.58552	-0.77222	0.00538494	0.0143212	23720.4	16440.7	14344.7	20689.5	24882.1	12251	19058.6	19742.7	39849.8	18869.9	34609.5	27671.4	37665.2	29535.2	35935.8	33976.9
PC(28:2)	PC	M+H	674.476	8.555	C36 H69 O8 N1 P1	0.0425866	3205.46	1053.63	5535.64	1675.48	0.57906	-0.78822	0.0100817	0.023429	3273.61	3823.08	1697.97	2818.56	4292.17	2189.95	2748.58	4799.74	5373.64	2397.98	6075.68	4683.25	6138.96	4948.57	6442.44	8224.58
PC(29:0)	PC	M+H	692.522	11.8482	C37 H75 O8 N1 P1	0.1283	85614.8	16865.3	110717	22431.1	0.77328	-0.37094	0.0405689	0.0719971	66042.2	95111.1	96620.9	83869.9	89910.2	70494.9	68209.5	114660	83734.4	145379	110790	115793	115797	76949.5	130372	106920
PC(29:2)	PC	M+H	688.491	11.8739	C37 H71 O8 N1 P1	0.143131	68260.3	20283.3	39937.1	18196	1.7092	0.77332	0.0135873	0.0294907	66148	71127.6	102902	57776.4	88453.3	67338.7	36882.3	55453.4	23694	30868.6	16589.1	62510	24443.3	50439.3	49009.5	61943
PC(30:0)	PC	M+H	706.538	12.5747	C38 H77 O8 N1 P1	1.94056	1.20953e+07	1.08348e+06	8.48918e+06	857072	1.4248	0.51075	0.000939106	0.00397777	1.09603e+07	1.32311e+07	1.18841e+07	1.24378e+07	1.39346e+07	1.08827e+07	1.21259e+07	1.13059e+07	7.13732e+06	9.27202e+06	7.83179e+06	9.47735e+06	7.81975e+06	8.18768e+06	9.20082e+06	8.98672e+06
PC(30:1)	PC	M+H	704.522	12.0429	C38 H75 O8 N1 P1	0.36348	306255	30071.4	176513	46804.9	1.735	0.79496	0.000939106	0.00397777	337548	311092	326463	272034	310621	327957	249782	314545	212161	143042	217113	106429	248353	167956	174380	142674
PC(30:1e)	PC	M+H	690.543	13.2455	C38 H77 O7 N1 P1	0.188819	35005	41846.1	87629.8	37308.8	0.39947	-1.3239	0.0308276	0.0589837	4.07469e-06	17899.3	119348	40786.5	4.07469e-06	68749.8	4.07469e-06	33256.4	89973.1	122764	134932	111179	46652.4	67690.8	28490.6	99357
PC(30:2)	PC	M+H	702.507	10.0283	C38 H73 O8 N1 P1	0.0905477	24861.7	5062.79	39136.1	18484.1	0.63526	-0.65458	0.0239487	0.0468347	28081.6	26311.5	21156.3	22561.5	26976	15227.7	31680.7	26898.3	55776.6	17717.7	31034.9	29441.6	33666.2	30492.6	38522.4	76436.9
PC(16:0_14:2)	PC	M+Na	724.489	10.6011	C38 H72 O8 N1 P1 Na1	0.0113243	18005.5	4058.69	16826.8	8641.21	1.0701	0.097679	0.874826	0.905144	16234.8	22122.7	12507.1	13741.1	20588.2	15513.9	23552	19784.3	14492.8	6561.21	24215.2	5994.97	30859.6	22167.8	17277.2	13045.5
PC(30:3)	PC	M+H	700.491	8.974	C38 H71 O8 N1 P1	0.0668231	2943.26	1313.35	7753.65	2466.73	0.3796	-1.3975	0.00387604	0.0109285	3895.71	1701.53	2453.49	4173.96	4330.26	1442.04	1426.17	4122.93	9158.08	3667.73	8026.24	6736.66	9006.1	5274.12	8617.99	11542.3
PC(30:6)	PC	M+H	694.444	6.11968	C38 H65 O8 N1 P1	0.0408289	4185.11	1653.62	6874.96	2808.09	0.60875	-0.71609	0.0405689	0.0719971	3837.86	4374.44	2372.54	4809.6	6272.79	3889.27	6282.1	1642.26	5200.86	2789.36	9793.07	7125.48	7588.61	5224.18	11611.1	5666.99
PC(30:7e)	PC	M+H	678.449	8.87542	C38 H65 O7 N1 P1	0.0614638	12059.2	5099.2	17458.4	1993.82	0.69074	-0.53379	0.0135873	0.0294907	16016.3	11588.6	8137.02	16563.6	17650.5	10561.3	13619.1	2337.05	17208.7	16831.1	18184.9	21209.7	17481.2	16444.7	14111.7	18195
PC(31:0)	PC	M+H	720.554	13.3572	C39 H79 O8 N1 P1	2.08605	1.62542e+06	179215	5.47509e+06	763710	0.29688	-1.7521	0.000939106	0.00397777	1.38839e+06	1.58109e+06	1.94921e+06	1.57707e+06	1.73104e+06	1.41938e+06	1.68945e+06	1.66775e+06	4.54293e+06	6.46581e+06	6.16058e+06	6.13977e+06	4.61195e+06	5.07878e+06	4.94911e+06	5.85179e+06
PC(18:0_13:0)	PC	M+H	720.554	15.72	C39 H79 O8 N1 P1	0.203482	1.43707e+06	165876	1.33268e+06	143155	1.0783	0.10879	0.189263	0.257782	1.55577e+06	1.26369e+06	1.30018e+06	1.68661e+06	1.5642e+06	1.22288e+06	1.50149e+06	1.4017e+06	1.21191e+06	1.1392e+06	1.25816e+06	1.25545e+06	1.33725e+06	1.43673e+06	1.46042e+06	1.56235e+06
PC(31:0e)	PC	M+H	706.575	14.2191	C39 H81 O7 N1 P1	0.730221	37526.8	15313.2	503890	76066.3	0.074474	-3.7471	0.000939106	0.00397777	9776.2	43651.2	43174.9	60778.6	47740.4	27309.9	37509.1	30274.4	504496	553665	513843	594222	399813	455508	413706	595867
PC(31:1)	PC	M+H	718.538	12.0105	C39 H77 O8 N1 P1	0.660584	434142	50468.4	858266	166583	0.50584	-0.98326	0.000939106	0.00397777	442699	410610	512654	395684	487876	357329	452758	413526	671574	1.16184e+06	711189	1.04157e+06	816764	874373	763845	824967
PC(31:1e)	PC	M+H	704.559	14.0063	C39 H79 O7 N1 P1	0.164139	24237.6	13371.6	60859.3	31554.1	0.39826	-1.3282	0.0135873	0.0294907	16619.2	10691.9	44372.4	17631.7	26543	41617.9	8698.26	27726.1	47432.6	118883	67271.5	76373.9	14134.2	46718.9	38774.4	77285.4
PC(16:1e_15:0)	PC	M+H	704.559	15.2023	C39 H79 O7 N1 P1	0.549349	533917	56534.6	834001	122809	0.64019	-0.64343	0.00135938	0.00497765	538994	566681	510093	502033	462795	652896	515343	522499	733492	809052	901507	912270	738241	967717	638404	971324
PC(31:2)	PC	M+H	716.522	10.7568	C39 H75 O8 N1 P1	0.118417	5306.79	1199.92	18906.9	5397.44	0.28068	-1.833	0.000939106	0.00397777	5352.32	6268.78	5402.43	4300.95	6230.92	4366.05	7053.61	3479.26	19027.4	14404.7	23288.7	29176.1	12740.5	14455.4	18344.9	19817.4
PC(18:2_13:0)	PC	M+H	716.522	13.3653	C39 H75 O8 N1 P1	1.46804	2.34263e+06	400811	5.07931e+06	2.2401e+06	0.46121	-1.1165	0.000939106	0.00397777	2.84979e+06	2.27608e+06	2.08509e+06	2.12711e+06	2.87504e+06	1.71974e+06	2.21555e+06	2.59267e+06	3.53122e+06	5.08144e+06	3.53591e+06	8.97995e+06	2.95937e+06	5.61285e+06	3.22484e+06	7.70889e+06
PC(31:2e)	PC	M+H	702.543	14.2571	C39 H77 O7 N1 P1	0.773657	28749.2	20654.5	561965	117597	0.051158	-4.2889	0.000939106	0.00397777	34087.9	26526.9	8767.37	71877.1	21930.9	17511.6	40251.9	9039.91	565367	464494	737852	579694	436622	545993	442845	722855
PC(31:3)	PC	M+H	714.507	11.9985	C39 H73 O8 N1 P1	0.0939307	552409	183453	603296	179809	0.91565	-0.12713	0.494837	0.568203	467926	487907	934902	416907	476450	662215	357823	615143	455726	860644	471382	900745	498782	526416	481525	631151
PC(9:0_23:0)	PC	M+H	734.569	18.838	C40 H81 O8 N1 P1	0.0144753	135751	48993.4	140288	71720.2	0.96766	-0.047425	0.958122	0.972038	129403	86971	156105	108837	233673	87870.5	116130	167020	209762	99954.9	267915	153588	43155	151040	102641	94247.2
PC(32:0e)	PC	M+H	720.59	14.8873	C40 H83 O7 N1 P1	5.37252	1.10863e+07	1.78346e+06	3.65725e+07	4.72004e+06	0.30313	-1.722	0.000939106	0.00397777	9.50478e+06	1.10239e+07	1.10821e+07	1.3105e+07	1.27682e+07	8.21211e+06	1.29562e+07	1.00381e+07	3.64971e+07	3.36252e+07	4.13951e+07	4.12528e+07	3.20737e+07	3.63797e+07	2.93448e+07	4.20113e+07
PC(32:1e)	PC	M+H	718.575	13.888	C40 H81 O7 N1 P1	0.529742	48655	50127.1	308284	64480.7	0.15783	-2.6636	0.000939106	0.00397777	5492.71	58599.5	148829	96259	15350.2	19002.5	24648.5	21058.7	306139	370715	327571	322709	262735	306274	181468	388663
PC(32:2)	PC	M+H	730.538	12.0065	C40 H77 O8 N1 P1	0.1484	569327	102684	509201	92173.2	1.1181	0.16102	0.156254	0.220027	635339	681050	354360	534935	627272	543735	540017	637910	477798	681951	461255	580887	524848	525146	384743	436980
PC(32:2e)	PC	M+H	716.559	12.409	C40 H79 O7 N1 P1	0.669207	15028.9	12432	414351	89563.6	0.036271	-4.785	0.000930972	0.00397777	4.07469e-06	30780.2	31037	23581.6	11874.4	8522.64	14435.4	4.07469e-06	503065	268545	511185	447310	317442	408894	371315	487053
PC(18:2_14:1)	PC	M+Na	750.504	10.5416	C40 H74 O8 N1 P1 Na1	0.0666661	14404.2	4723.54	22445.4	10321.1	0.64174	-0.63993	0.270149	0.348585	17970.7	16778.8	7477	19660.8	14834.6	7002.8	17094.9	14413.8	14691.2	10364	15580.8	27822.8	32222.1	32489.4	11665.1	34728
PC(32:3)	PC	M+H	728.522	11.5316	C40 H75 O8 N1 P1	0.14897	39001	19381.2	11374.1	10707	3.4289	1.7778	0.00538494	0.0143212	25400	65334.6	70082.2	25239.9	38508.7	14925.6	36834.2	35683	6047.87	732.049	31868.4	10482.5	16393.6	1100.92	19532.6	4835.02
PC(32:3e)	PC	M+H	714.543	11.12	C40 H77 O7 N1 P1	0.0881697	4.07469e-06	0	10153.1	8877.68	4.0132e-10	-31.215	0.0045693	0.0128635	4.07469e-06	4.07469e-06	4.07469e-06	4.07469e-06	4.07469e-06	4.07469e-06	4.07469e-06	4.07469e-06	25182.4	11817.6	19531.5	4.07469e-06	4872.65	9234.1	4.07469e-06	10586.6
PC(18:3e_14:0)	PC	M+H	714.543	11.509	C40 H77 O7 N1 P1	0.31888	0.00367792	0.0103912	92200.3	24823.4	3.9891e-08	-24.579	0.000553535	0.00397777	4.07469e-06	4.07469e-06	4.07469e-06	4.07469e-06	4.07469e-06	4.07469e-06	0.0293949	4.07469e-06	133017	54714.7	83534.4	117080	95270.3	78171.3	75556.9	100258
PC(14:1e_18:2)	PC	M+H	714.543	14.7427	C40 H77 O7 N1 P1	0.324512	10269.9	9758.68	107035	27315.8	0.095949	-3.3816	0.000930972	0.00397777	25689.7	9421.77	4.07469e-06	8938.82	5960.38	8028.51	4.07469e-06	24119.9	79237	102294	105439	153137	69287.9	104903	105482	136498
PC(32:4)	PC	M+H	726.507	9.52916	C40 H73 O8 N1 P1	0.0715718	7052.3	1830	12631.1	2788.99	0.55833	-0.84082	0.00387604	0.0109285	7955.69	7114.37	4801.03	5529.74	8865.72	4618.95	8492.9	9040	15467.6	7740.25	10223	11308.5	14238.8	12475.8	16009.7	13585.4
PC(32:4e)	PC	M+H	712.528	10.6876	C40 H75 O7 N1 P1	0.22674	2260.46	627.223	52899.9	21973.9	0.042731	-4.5486	0.000939106	0.00397777	2382.39	2729.34	2722.69	3159.21	1688.07	1376.86	1647.56	2377.58	77932.1	17814.7	83363.1	41286.3	47827.2	42314.2	68540.7	44121.1
PC(32:5)	PC	M+H	724.491	10.589	C40 H71 O8 N1 P1	0.0116221	18036.6	4056.12	16826.8	8641.21	1.0719	0.10017	0.874826	0.905144	16234.8	22122.7	12507.1	13741.1	20588.2	15637.3	23552	19909.5	14492.8	6561.21	24215.2	5994.97	30859.6	22167.8	17277.2	13045.5
PC(32:6)	PC	M+H	722.476	7.945	C40 H69 O8 N1 P1	0.0401141	2919.16	930.17	5439	2775.14	0.53671	-0.89779	0.0660819	0.107911	2642.69	3202.48	1632.18	4003.48	3978.41	2214.03	3687.33	1992.64	5238.79	1928.67	6698.5	2754.95	7110.58	3411.87	10505.9	5862.66
PC(32:7e)	PC	M+H	706.481	10.458	C40 H69 O7 N1 P1	0.0252534	5062.67	2444.74	3517.65	1905.94	1.4392	0.52529	0.127808	0.186204	5502.53	6319.93	3746.99	6653.6	7045.99	3939.29	7293.07	4.07469e-06	4439.13	3601.86	4217.01	6189.63	5253.45	2337.38	619.811	1482.93
PC(32:8e)	PC	M+H	704.465	8.92205	C40 H67 O7 N1 P1	0.0199266	5670.18	2354.43	6928.75	2452.61	0.81836	-0.2892	0.372029	0.452003	9516	5230.84	3462.92	7544.4	7880.98	4513.59	4194.3	3018.42	3868.38	6298.11	6791.94	5574.73	10512.6	9331.88	8929.09	4123.27
PC(16:0_17:0)	PC	M+H	748.585	13.259	C41 H83 O8 N1 P1	0.81319	1.15787e+06	250879	1.96721e+06	575539	0.58858	-0.76468	0.00135938	0.00497765	1.4808e+06	867861	1.23424e+06	1.28851e+06	1.2683e+06	1.11807e+06	1.29178e+06	713365	1.50586e+06	2.37981e+06	1.38981e+06	2.87792e+06	1.48959e+06	1.66015e+06	1.8139e+06	2.62063e+06
PC(33:0)	PC	M+H	748.585	14.7194	C41 H83 O8 N1 P1	1.68271	2.09642e+06	351997	4.58432e+06	285831	0.4573	-1.1288	0.000939106	0.00397777	2.01675e+06	2.2408e+06	1.8082e+06	1.89871e+06	2.84559e+06	1.84637e+06	2.27097e+06	1.844e+06	4.58664e+06	4.70021e+06	4.61962e+06	4.36592e+06	4.87372e+06	3.99515e+06	4.68867e+06	4.84461e+06
PC(18:0_15:0)	PC	M+H	748.585	16.9231	C41 H83 O8 N1 P1	0.355874	622109	145371	453162	48373.2	1.3728	0.45714	0.0239487	0.0468347	822322	573161	501905	783669	649287	516682	717411	412438	441394	371325	412662	462429	469281	521016	441043	506143
PC(33:0e)	PC	M+Na	756.588	16.598	C41 H84 O7 N1 P1 Na1	0.542402	1.09703e+06	285684	1.57976e+06	525942	0.69442	-0.52611	0.0520296	0.0879514	1.4596e+06	970473	819219	1.10114e+06	1.2315e+06	686636	1.48937e+06	1.01827e+06	1.37895e+06	1.28305e+06	1.48504e+06	2.60532e+06	997779	1.70832e+06	1.14723e+06	2.03239e+06
PC(17:1_16:0)	PC	M+H	746.569	12.0411	C41 H81 O8 N1 P1	0.494303	137445	36758.5	394221	134181	0.34865	-1.5202	0.00135938	0.00497765	184560	116692	116945	127774	125655	86356.5	196493	145082	359983	253899	194422	586698	524287	451953	328275	454250
PC(33:1)	PC	M+H	746.569	13.4341	C41 H81 O8 N1 P1	2.38783	5.55554e+06	742306	1.07263e+07	1.18012e+06	0.51794	-0.94915	0.000939106	0.00397777	5.95398e+06	5.73828e+06	4.93144e+06	5.0732e+06	6.54319e+06	4.2625e+06	6.12962e+06	5.81213e+06	1.01903e+07	1.14573e+07	9.64257e+06	1.26322e+07	1.00644e+07	1.02963e+07	9.44179e+06	1.20854e+07
PC(33:1e)	PC	M+H	732.59	16.5533	C41 H83 O7 N1 P1	0.569026	1.02678e+06	164565	1.4393e+06	303312	0.71339	-0.48723	0.0135873	0.0294907	1.07642e+06	1.015e+06	914465	1.38079e+06	930561	836325	1.07205e+06	988669	1.34521e+06	1.17922e+06	1.57312e+06	1.5679e+06	1.28209e+06	1.78935e+06	952456	1.82502e+06
PC(33:2)	PC	M+H	744.554	12.0006	C41 H79 O8 N1 P1	0.606252	254487	155892	923945	940290	0.27544	-1.8602	0.0239487	0.0468347	586943	329308	147196	333468	149335	153062	172733	163853	272519	683266	454712	2.86384e+06	320990	1.86771e+06	311805	616714
PC(15:0_18:2)	PC	M+H	744.554	14.7275	C41 H79 O8 N1 P1	2.03463	5.97349e+06	1.93408e+06	1.18997e+07	5.70625e+06	0.50199	-0.99428	0.00740553	0.0183503	9.01125e+06	4.81765e+06	3.38259e+06	5.79633e+06	8.42858e+06	4.28767e+06	6.04388e+06	6.01997e+06	9.74351e+06	9.81321e+06	7.75214e+06	2.23431e+07	6.14032e+06	1.44509e+07	7.363e+06	1.75917e+07
PC(33:2e)	PC	M+Na	752.556	13.779	C41 H80 O7 N1 P1 Na1	0.760242	2.01838e+06	304879	1.41616e+06	90489.1	1.4252	0.51121	0.000939106	0.00397777	1.85155e+06	1.83352e+06	2.3775e+06	2.22576e+06	2.36644e+06	1.61022e+06	2.18287e+06	1.69918e+06	1.37544e+06	1.50701e+06	1.40235e+06	1.49331e+06	1.35393e+06	1.51296e+06	1.24978e+06	1.43452e+06
PC(33:3)	PC	M+H	742.538	13.4272	C41 H77 O8 N1 P1	1.37059	3.74127e+06	529442	6.22318e+06	2.14971e+06	0.60118	-0.73412	0.00387604	0.0109285	4.36918e+06	3.35934e+06	4.41203e+06	3.45694e+06	3.92689e+06	3.11064e+06	3.1777e+06	4.11743e+06	5.48409e+06	6.01738e+06	4.46874e+06	1.03605e+07	4.39539e+06	7.02357e+06	4.08155e+06	7.95424e+06
PC(33:3e)	PC	M+H	728.559	12.0427	C41 H79 O7 N1 P1	0.261057	12108.2	3261.62	75200.7	19666.3	0.16101	-2.6348	0.000939106	0.00397777	11761.2	8231.87	16285.6	12119	6694.22	15217.6	13001.6	13554.8	79715.7	58908.7	73146.8	110993	45607.7	85346.2	65157.8	82730.2
PC(33:4)	PC	M+H	740.522	9.705	C41 H75 O8 N1 P1	0.0796365	1721.25	491.931	8155.78	3078.91	0.21105	-2.2444	0.000939106	0.00397777	1381.7	1932.98	2505.59	2071.44	1422.67	1124.18	1250.87	2080.6	11917.8	5472.73	13192.4	7463.13	5083.14	6340.17	9660.22	6116.65
PC(20:4_13:0)	PC	M+H	740.522	13.076	C41 H75 O8 N1 P1	2.76976	1.76305e+07	1.75421e+06	1.06252e+07	963859	1.6593	0.73058	0.000939106	0.00397777	1.80312e+07	1.97695e+07	1.63826e+07	1.82567e+07	1.94392e+07	1.45088e+07	1.82379e+07	1.6418e+07	9.50666e+06	1.00855e+07	9.9026e+06	1.16869e+07	1.03792e+07	1.17097e+07	9.87591e+06	1.18554e+07
PC(33:5)	PC	M+H	738.507	11.7302	C41 H73 O8 N1 P1	0.311042	679965	174484	505985	170074	1.3438	0.42637	0.0831229	0.13017	599763	501620	1.03685e+06	777486	537598	615475	603286	767645	373827	729198	398404	748938	409364	393671	351494	642982
PC(33:6)	PC	M+H	736.491	11.1556	C41 H71 O8 N1 P1	0.0563478	206489	36649.5	192890	34758.7	1.0705	0.098287	0.494837	0.568203	225619	226958	132074	218589	255350	191870	189196	212257	204196	139070	185376	148038	226540	188180	230097	221625
PC(34:0)	PC	M+H	762.601	15.3671	C42 H85 O8 N1 P1	0.972912	5.53091e+07	8.45912e+06	5.20892e+07	4.0591e+06	1.0618	0.086532	0.636502	0.703383	5.56007e+07	6.0244e+07	4.4731e+07	5.61015e+07	6.49561e+07	4.51841e+07	6.665e+07	4.90052e+07	5.07766e+07	4.72771e+07	5.66926e+07	5.21606e+07	5.05972e+07	4.95402e+07	5.96023e+07	5.00672e+07
PC(34:0e)	PC	M+H	748.621	16.1827	C42 H87 O7 N1 P1	1.67843	6.72343e+06	1.35388e+06	9.97378e+06	1.77343e+06	0.67411	-0.56894	0.0027616	0.00834568	6.67992e+06	6.79549e+06	5.66225e+06	8.83122e+06	7.87079e+06	5.39654e+06	7.64977e+06	4.90142e+06	9.04713e+06	9.11306e+06	1.25966e+07	1.02494e+07	8.41315e+06	1.01421e+07	7.77375e+06	1.24551e+07
PC(18:0_16:1)	PC	M+H	760.585	12.015	C42 H83 O8 N1 P1	0.918893	146493	52294	900490	165701	0.16268	-2.6199	0.000939106	0.00397777	64642.1	116988	196880	129711	223380	103657	163307	173377	915658	870958	877785	1.20478e+06	1.02704e+06	760029	651040	896631
PC(26:1_8:0)	PC	M+H	760.585	27.378	C42 H83 O8 N1 P1	0.00839662	1607.51	1969.76	2178.38	3559.24	0.73794	-0.43843	0.563524	0.634285	419.729	384.934	649.529	6094.04	1829.9	2464.32	439.583	578.034	10391.5	174.814	335.118	3.7092	15.2294	3642.46	2188.81	675.424
PC(16:1e_18:0)	PC	M+Na	768.588	15.9721	C42 H84 O7 N1 P1 Na1	0.169415	72077.7	29081.7	111583	24044.9	0.64596	-0.63049	0.00740553	0.0183503	11510.6	94205.8	88317.1	49671.5	76951.3	68571.2	90119.7	97274.3	99084.6	150112	106891	108708	142848	78681.3	93827.6	112510
PC(16:1_18:1)	PC	M+H	758.569	17.7528	C42 H81 O8 N1 P1	0.149811	31014.9	17503.7	68762.7	45126	0.45104	-1.1487	0.0405689	0.0719971	41869.4	56455.8	4131.62	12468.9	36381.9	37474.4	18742.3	40594.8	44288.6	74726.3	29422.3	108472	51599.3	41371	38934.9	161288
PC(34:2e)	PC	M+H	744.59	13.8387	C42 H83 O7 N1 P1	5.06039	3.68326e+06	969199	2.65098e+07	5.05799e+06	0.13894	-2.8475	0.000939106	0.00397777	2.88556e+06	3.08959e+06	3.3617e+06	5.48671e+06	4.20365e+06	2.89643e+06	4.5853e+06	2.95714e+06	2.7239e+07	2.22455e+07	3.52958e+07	2.99539e+07	2.20301e+07	2.36656e+07	2.12301e+07	3.04187e+07
PC(16:1e_18:1)	PC	M+H	744.59	17.1686	C42 H83 O7 N1 P1	0.0692711	2.41642e+06	491873	2.47046e+06	215565	0.97813	-0.031908	0.372029	0.452003	2.55238e+06	2.26974e+06	1.89105e+06	2.48537e+06	2.59056e+06	1.92521e+06	3.43849e+06	2.1786e+06	2.18351e+06	2.32754e+06	2.55646e+06	2.62256e+06	2.72064e+06	2.24e+06	2.73182e+06	2.38119e+06
PC(16:1_18:2)	PC	M+Na	778.536	11.7743	C42 H78 O8 N1 P1 Na1	0.669377	479418	83390.7	936747	210196	0.51179	-0.96638	0.000939106	0.00397777	572213	489614	396619	475021	528676	326215	564146	482841	803448	1.0039e+06	761815	1.26749e+06	776199	1.18446e+06	699619	997043
PC(16:0_18:3)	PC	M+Na	778.536	13.1289	C42 H78 O8 N1 P1 Na1	0.594095	710130	596171	1.26377e+06	245212	0.56191	-0.83158	0.0831229	0.13017	418849	368221	1.77957e+06	318729	379491	303883	568565	1.54373e+06	1.28802e+06	886609	1.24434e+06	1.2547e+06	1.11224e+06	1.16598e+06	1.73106e+06	1.42724e+06
PC(34:3e)	PC	M+H	742.575	13.5765	C42 H81 O7 N1 P1	2.11883	2.52694e+06	473485	6.89088e+06	1.72817e+06	0.36671	-1.4473	0.000939106	0.00397777	2.23286e+06	2.30714e+06	2.45794e+06	2.50246e+06	3.12617e+06	1.8127e+06	3.2748e+06	2.5014e+06	5.88026e+06	6.21711e+06	6.56158e+06	9.95904e+06	4.90318e+06	8.33516e+06	5.26769e+06	8.00302e+06
PC(18:3e_16:0)	PC	M+H	742.575	13.88	C42 H81 O7 N1 P1	0.390607	57140.7	29287.4	210864	66532.9	0.27098	-1.8837	0.00135938	0.00497765	40784.7	24022.3	111451	30364.1	66577.5	62663.3	80996	40267	97007.9	222149	261869	271488	139658	203085	200862	290791
PC(18:4_16:0)	PC	M+Na	776.52	10.6653	C42 H76 O8 N1 P1 Na1	0.29013	54146.5	18033.3	149099	59228.8	0.36316	-1.4613	0.000939106	0.00397777	63839.8	73103.6	34828.2	58915.8	58445	22838.5	73737.3	47464	103033	139732	129708	155296	111825	182178	93867.1	277154
PC(34:4)	PC	M+H	754.538	10.6653	C42 H77 O8 N1 P1	0.850363	128294	35789.5	848882	325336	0.15113	-2.7261	0.000939106	0.00397777	143067	117830	76591.9	133585	159836	74889.8	165003	155551	547189	858010	801660	1.28504e+06	527203	876141	539551	1.35626e+06
PC(16:2e_18:2)	PC	M+H	740.559	12.0891	C42 H79 O7 N1 P1	0.996107	421027	53070.3	1.28512e+06	118407	0.32762	-1.6099	0.000939106	0.00397777	392068	489218	436926	462440	354265	395270	478723	359307	1.346e+06	1.18365e+06	1.43711e+06	1.279e+06	1.46574e+06	1.20957e+06	1.19636e+06	1.1635e+06
PC(34:5)	PC	M+H	752.522	10.0256	C42 H75 O8 N1 P1	0.115285	91455.2	39228.2	121915	41807	0.75015	-0.41474	0.189263	0.257782	71484	118530	79270.8	125096	153430	37898.6	94953.4	50977.5	135807	73451.2	95136.5	142780	146703	199436	92686.2	89321.5
PC(23:1_11:4)	PC	M+Na	774.504	10.5916	C42 H74 O8 N1 P1 Na1	0.0321702	8158.12	7610	4973.44	3392.71	1.6403	0.71399	0.494837	0.568203	16323.3	15747	7952.26	1452.3	557.727	3472.96	18553.5	1205.91	5634.79	6096.03	5862.98	183.702	6286.2	10311.2	4.07469e-06	5412.64
PC(20:4_14:1)	PC	M+H	752.522	12.469	C42 H75 O8 N1 P1	0.136706	141771	21396.8	109981	35426.6	1.2891	0.36631	0.0660819	0.107911	154228	143073	160661	113959	136272	138874	112953	174151	99971.7	110225	71576.3	131280	102335	145140	57403.2	161918
PC(34:5e)	PC	M+H	738.543	11.8659	C42 H77 O7 N1 P1	0.162359	103692	22074.3	138604	22153.3	0.74811	-0.41867	0.0135873	0.0294907	81326.1	128707	116194	89823.2	69920.9	110689	101911	130962	135508	159489	173708	120204	158549	116674	124779	119924
PC(14:1e_20:4)	PC	M+H	738.543	14.3236	C42 H77 O7 N1 P1	0.0198605	353452	13929.9	348930	43571.4	1.013	0.018575	0.713191	0.769972	351623	374257	348370	329016	341937	362526	359791	360092	362585	410717	294643	335567	306730	316556	405782	358860
PC(34:6)	PC	M+H	750.507	11.944	C42 H73 O8 N1 P1	0.697744	633183	89226.2	1.13303e+06	235659	0.55884	-0.83949	0.000939106	0.00397777	633880	672851	512059	618572	744394	508905	740214	634588	1.21052e+06	860569	1.29988e+06	808157	1.34524e+06	947703	1.44198e+06	1.15015e+06
PC(34:6e)	PC	M+H	736.528	13.861	C42 H75 O7 N1 P1	0.244154	125594	103595	33755.8	11284.5	3.7207	1.8956	0.00387604	0.0109285	39968.1	61477.3	269175	49444.3	259733	46000.2	60253.8	218701	31786.9	35326.3	52274.8	35272.7	13361.6	43021.1	28548.9	30454.1
PC(34:7)	PC	M+H	748.491	8.84772	C42 H71 O8 N1 P1	0.0461929	17808.5	5904.84	13636.6	2700.78	1.3059	0.38508	0.189263	0.257782	12261	16383.4	11317.6	25861.8	24524.8	17822.6	11749.3	22547.2	13563.1	10076.9	13174.6	10017.2	15073.9	13334.6	17722.9	16129.5
PC(12:1e_22:6)	PC	M+H	734.512	12.5353	C42 H73 O7 N1 P1	0.768946	253978	38085.1	781731	114803	0.32489	-1.622	0.000939106	0.00397777	309969	232434	231354	259109	247348	205801	311210	234595	686369	808622	925689	841591	636983	658434	766915	929243
PC(35:0)	PC	M+H	776.616	15.8251	C43 H87 O8 N1 P1	0.332297	696418	78172.3	838000	90803.5	0.83105	-0.267	0.0239487	0.0468347	842832	706640	737941	716109	698527	645758	645089	578446	823276	859581	928667	823066	829111	642696	937366	860233
PC(35:0e)	PC	M+H	762.637	16.7646	C43 H89 O7 N1 P1	0.522931	18218.5	13322.8	277626	93792.1	0.065623	-3.9297	0.000939106	0.00397777	15626.8	5765.36	4962	36735.7	19292.8	6129.71	38579.5	18656.3	138423	301688	319126	321520	206257	305727	192837	435427
PC(35:1)	PC	M+H	774.601	12.505	C43 H85 O8 N1 P1	0.170294	1989.38	3060.47	38328.1	29325	0.051904	-4.268	0.000859897	0.00397777	4.07469e-06	4.07469e-06	8.17538e-05	4640.24	8100.5	4.07469e-06	4.07469e-06	3174.32	17632.4	50643.4	22735.7	98497.8	16417.7	33346.7	11003.8	56347.4
PC(17:1_18:0)	PC	M+H	774.601	16.886	C43 H85 O8 N1 P1	0.723187	1.21355e+06	304175	1.82282e+06	299876	0.66575	-0.58694	0.00538494	0.0143212	1.57986e+06	1.2512e+06	795834	1.44879e+06	1.33422e+06	840314	1.48195e+06	976212	1.89556e+06	1.47725e+06	1.82847e+06	2.00109e+06	1.42406e+06	2.28549e+06	1.6122e+06	2.05845e+06
PC(35:1e)	PC	M+H	760.621	17.6173	C43 H87 O7 N1 P1	0.366977	282111	66142.7	461160	147268	0.61174	-0.709	0.018129	0.0375566	332100	263434	179029	381629	278105	218361	336511	267720	351425	384983	563627	559837	321667	569388	266157	672198
PC(17:1_18:1)	PC	M+H	772.585	12.129	C43 H83 O8 N1 P1	0.363499	50301.1	7087.93	173686	40588.9	0.28961	-1.7878	0.000939106	0.00397777	55060.6	42589.9	40928.3	57344.5	61064.7	47263.7	50497.3	47659.5	146268	139262	137229	243350	160996	216794	146408	199179
PC(35:2)	PC	M+H	772.585	13.4993	C43 H83 O8 N1 P1	2.17748	3.85262e+06	622570	8.59147e+06	2.08543e+06	0.44842	-1.1571	0.000939106	0.00397777	4.58766e+06	4.31676e+06	3.89953e+06	3.47705e+06	4.2376e+06	2.5857e+06	4.0327e+06	3.68394e+06	7.16322e+06	7.27778e+06	6.9825e+06	1.14603e+07	6.83605e+06	1.17614e+07	7.45772e+06	9.79276e+06
PC(35:2e)	PC	M+H	758.606	17.4657	C43 H85 O7 N1 P1	0.086952	746330	126084	705176	149794	1.0584	0.081831	0.874826	0.905144	976727	697203	595565	794186	735805	586883	814856	769417	679898	642187	824906	771229	531198	825914	473351	892725
PC(35:3)	PC	M+H	770.569	12.4471	C43 H81 O8 N1 P1	1.69316	612353	110926	3.57286e+06	1.51659e+06	0.17139	-2.5446	0.000939106	0.00397777	647098	685238	472668	638447	771182	430576	607673	645938	2.15824e+06	3.6825e+06	2.90019e+06	6.13172e+06	2.10234e+06	4.47617e+06	2.13262e+06	4.99911e+06
PC(15:0_20:3)	PC	M+H	770.569	15.0408	C43 H81 O8 N1 P1	0.193012	2.91174e+06	394150	2.75805e+06	382123	1.0557	0.078233	0.636502	0.703383	2.78425e+06	3.1172e+06	3.69208e+06	2.56279e+06	3.06002e+06	2.52758e+06	2.98873e+06	2.56128e+06	2.98847e+06	2.24673e+06	2.29502e+06	2.67466e+06	2.66984e+06	3.21472e+06	2.70057e+06	3.27439e+06
PC(35:3e)	PC	M+H	756.59	14.2973	C43 H83 O7 N1 P1	0.334545	18018.9	15261.3	121766	29329.8	0.14798	-2.7565	0.000930972	0.00397777	4.07469e-06	17639.1	15871	19772.1	29153.2	14741.2	46974.9	4.07469e-06	95649.2	103378	117619	173695	92130	153453	133086	105118
PC(35:4)	PC	M+H	768.554	12.0041	C43 H79 O8 N1 P1	1.95177	7.51087e+06	1.40026e+06	1.1516e+07	1.66143e+06	0.65221	-0.61659	0.000939106	0.00397777	8.51648e+06	8.05805e+06	5.50502e+06	7.1589e+06	8.83571e+06	5.34315e+06	8.81188e+06	7.85779e+06	1.11071e+07	1.12008e+07	1.43674e+07	1.03198e+07	1.3552e+07	9.62819e+06	1.17518e+07	1.02008e+07
PC(22:4_13:0)	PC	M+H	768.554	14.4757	C43 H79 O8 N1 P1	6.00745	1.39186e+08	1.1396e+07	1.04474e+08	7.39511e+06	1.3323	0.41388	0.000939106	0.00397777	1.4743e+08	1.4432e+08	1.2176e+08	1.46213e+08	1.53942e+08	1.23654e+08	1.37695e+08	1.38476e+08	1.05601e+08	1.00158e+08	9.25747e+07	1.13499e+08	9.93187e+07	1.13851e+08	1.01953e+08	1.08834e+08
PC(24:1_11:3)	PC	M+H	768.554	15.7591	C43 H79 O8 N1 P1	0.623744	2.30058e+06	932757	1.59056e+06	396137	1.4464	0.53246	0.127808	0.186204	3.5162e+06	2.96575e+06	2.03857e+06	3.37209e+06	1.86611e+06	2.36044e+06	1.34246e+06	943030	2.04583e+06	1.43554e+06	865128	1.95732e+06	1.62066e+06	1.93079e+06	1.29125e+06	1.57796e+06
PC(35:4e)	PC	M+H	754.575	15.6793	C43 H81 O7 N1 P1	0.841856	1.41495e+06	149445	775325	69799.3	1.825	0.86787	0.000939106	0.00397777	1.40547e+06	1.22819e+06	1.39105e+06	1.64896e+06	1.52454e+06	1.27244e+06	1.55395e+06	1.29498e+06	909522	730295	768998	805719	784187	796020	669276	738581
PC(35:5)	PC	M+H	766.538	13.1502	C43 H77 O8 N1 P1	3.93336	3.71203e+07	3.22427e+06	2.30153e+07	2.33072e+06	1.6129	0.68962	0.000939106	0.00397777	3.60112e+07	3.74029e+07	4.31454e+07	3.74066e+07	3.9004e+07	3.16942e+07	3.64658e+07	3.58326e+07	2.08083e+07	2.46783e+07	2.07286e+07	2.67628e+07	2.06985e+07	2.52975e+07	2.2299e+07	2.28494e+07
PC(22:5_13:0)	PC	M+H	766.538	13.5855	C43 H77 O8 N1 P1	3.46489	1.80733e+07	3.0029e+06	7.08808e+06	1.07602e+06	2.5498	1.3504	0.000939106	0.00397777	1.97944e+07	1.83812e+07	1.3286e+07	1.90536e+07	2.04315e+07	1.52729e+07	2.23707e+07	1.5996e+07	7.84641e+06	5.33561e+06	5.84643e+06	7.1986e+06	7.85499e+06	8.3609e+06	7.7194e+06	6.54232e+06
PC(35:6)	PC	M+H	764.522	11.9941	C43 H75 O8 N1 P1	2.70447	2.3968e+07	3.26315e+06	1.64881e+07	1.79114e+06	1.4537	0.53968	0.00387604	0.0109285	2.6262e+07	2.52071e+07	2.4026e+07	2.34839e+07	2.77548e+07	1.66821e+07	2.41434e+07	2.41845e+07	1.52751e+07	1.70071e+07	1.84287e+07	1.93564e+07	1.49733e+07	1.42119e+07	1.55531e+07	1.70993e+07
PC(22:6_13:0)	PC	M+H	764.522	12.612	C43 H75 O8 N1 P1	5.51603	8.16149e+07	7.27641e+06	1.11367e+08	1.0203e+07	0.73285	-0.44841	0.00135938	0.00497765	7.8729e+07	8.14885e+07	6.8116e+07	8.52701e+07	8.89617e+07	7.78526e+07	9.15226e+07	8.09785e+07	1.12137e+08	9.09222e+07	1.09476e+08	1.10233e+08	1.07204e+08	1.18057e+08	1.16994e+08	1.2591e+08
PC(36:0e)	PC	M+H	776.653	17.3168	C44 H91 O7 N1 P1	0.673592	1.86372e+06	398096	2.56934e+06	707188	0.72537	-0.46321	0.0405689	0.0719971	1.8574e+06	1.78164e+06	1.30615e+06	2.40937e+06	2.32401e+06	1.39381e+06	2.0849e+06	1.7525e+06	2.22418e+06	1.90033e+06	3.74673e+06	2.68994e+06	2.04275e+06	2.37611e+06	2.03779e+06	3.53686e+06
PC(20:0_16:1)	PC	M+H	788.616	18.6859	C44 H87 O8 N1 P1	0.150099	347373	425983	228951	337608	1.5172	0.60145	0.0660819	0.107911	183379	147552	1.37631e+06	192761	421640	123220	169933	164194	218562	92971.3	1.05518e+06	43825.4	112268	129329	86203.6	93266.5
PC(36:1e)	PC	M+H	774.637	16.1609	C44 H89 O7 N1 P1	2.44876	8.89247e+06	2.16538e+06	1.49882e+07	2.03773e+06	0.5933	-0.75317	0.000939106	0.00397777	9.95348e+06	8.7936e+06	6.15353e+06	1.1706e+07	1.01003e+07	6.29596e+06	1.10693e+07	7.06766e+06	1.38383e+07	1.31004e+07	1.7547e+07	1.55983e+07	1.38432e+07	1.4989e+07	1.27165e+07	1.82728e+07
PC(18:0_18:2)	PC	M+Na	808.583	15.656	C44 H84 O8 N1 P1 Na1	0.688344	1.42706e+06	671105	2.10675e+06	173731	0.67738	-0.56197	0.0660819	0.107911	633963	1.9986e+06	1.66516e+06	2.25371e+06	688332	2.05636e+06	1.41093e+06	709448	2.25014e+06	2.00205e+06	1.96588e+06	1.95602e+06	1.99276e+06	2.07375e+06	2.45357e+06	2.15985e+06
PC(36:2e)	PC	M+H	772.621	15.1768	C44 H87 O7 N1 P1	4.2992	2.73853e+06	1.05111e+06	1.98913e+07	5.40602e+06	0.13767	-2.8607	0.000939106	0.00397777	2.31082e+06	2.35048e+06	2.20314e+06	4.97141e+06	2.70763e+06	1.96074e+06	3.5736e+06	1.8304e+06	1.86287e+07	1.37364e+07	2.84512e+07	2.07831e+07	1.62017e+07	1.93185e+07	1.48977e+07	2.71131e+07
PC(20:2e_16:0)	PC	M+H	772.621	17.1623	C44 H87 O7 N1 P1	0.0888802	1.86545e+06	336686	1.80627e+06	196319	1.0328	0.046507	0.874826	0.905144	1.82041e+06	1.67019e+06	1.42986e+06	1.88777e+06	2.07127e+06	1.54763e+06	2.49993e+06	1.99653e+06	1.52673e+06	1.59579e+06	1.82217e+06	1.94594e+06	2.06771e+06	1.73732e+06	2.02626e+06	1.72827e+06
PC(16:1e_20:1)	PC	M+H	772.621	17.847	C44 H87 O7 N1 P1	0.0899332	14271.6	6570.46	26195.3	10844.4	0.54482	-0.87616	0.0313241	0.0589837	22512	7399.69	8928.2	20890	14489.9	5602.18	20540.2	13810.7	15044.8	28087.3	30103.3	33574.3	18044.5	28162	11740.9	44805.3
PC(18:0_18:3)	PC	M+H	784.585	14.608	C44 H83 O8 N1 P1	0.403194	51204.1	35471.6	256078	164222	0.19996	-2.3223	0.00740553	0.0183503	103931	7915.7	18383.4	77026.1	24091.5	70630.2	28495.7	79159.3	92992.8	341008	43034.4	477151	83663.3	423912	296952	289912
PC(36:3e)	PC	M+H	770.606	13.869	C44 H85 O7 N1 P1	1.55635	1.58205e+06	244059	3.79105e+06	574977	0.41731	-1.2608	0.000939106	0.00397777	1.41051e+06	1.6597e+06	1.64691e+06	1.5756e+06	1.98728e+06	1.13343e+06	1.68731e+06	1.55564e+06	3.64606e+06	4.00517e+06	4.29243e+06	4.76661e+06	3.09241e+06	3.65821e+06	3.05749e+06	3.81005e+06
PC(18:3e_18:0)	PC	M+H	770.606	14.8077	C44 H85 O7 N1 P1	0.318708	1.54621e+06	391171	1.30919e+06	233370	1.181	0.24006	0.227147	0.301073	1.49683e+06	1.71762e+06	2.30739e+06	1.05314e+06	1.15905e+06	1.55453e+06	1.35789e+06	1.72325e+06	1.35321e+06	1.36779e+06	1.21166e+06	1.00531e+06	1.44483e+06	1.7493e+06	1.27923e+06	1.06219e+06
PC(18:4_18:0)	PC	M+H	782.569	14.7077	C44 H81 O8 N1 P1	0.766241	947289	209535	373454	119527	2.5366	1.3429	0.000939106	0.00397777	1.12271e+06	785596	811106	878163	1.00911e+06	683632	1.3394e+06	948592	244462	492302	386929	348183	343905	593541	239667	338639
PC(16:1_20:3)	PC	M+H	782.569	17.1316	C44 H81 O8 N1 P1	0.0678823	100667	22944.7	117366	46718	0.85772	-0.22143	0.636502	0.703383	126577	106100	72166.4	87035.8	135692	77336.6	89850.5	110578	87485.2	95122.8	127929	99280.3	81396.5	160876	210155	76684.9
PC(26:0_10:4)	PC	M+H	782.569	18.9862	C44 H81 O8 N1 P1	0.187402	721755	1.35596e+06	466121	914202	1.5484	0.6308	0.318425	0.399191	243316	193058	177728	183782	196591	56011.7	676794	4.04676e+06	188417	81035.2	176920	2.72441e+06	60305.8	188108	208361	101411
PC(14:0_22:4)	PC	M+H	782.569	21.502	C44 H81 O8 N1 P1	0.0926902	29440.3	26342	12261.9	7839.81	2.401	1.2636	0.247648	0.327894	14360.5	11660.4	4.07469e-06	10994.7	67817.9	69769.1	32115.3	28804.2	24527.4	4.07469e-06	4963.1	12249.1	7657.99	14124.7	17997	16575.9
PC(36:4e)	PC	M+H	768.59	13.5489	C44 H83 O7 N1 P1	1.14711	1.84941e+07	2.41836e+06	1.63265e+07	1.20527e+06	1.1328	0.17985	0.0520296	0.0879514	1.6665e+07	2.26368e+07	1.84244e+07	2.00685e+07	1.78595e+07	1.52171e+07	2.0385e+07	1.66964e+07	1.62892e+07	1.50971e+07	1.72017e+07	1.81147e+07	1.56323e+07	1.71629e+07	1.44784e+07	1.66354e+07
PC(16:0_20:5)	PC	M+H	780.554	9.164	C44 H79 O8 N1 P1	0.065333	13093.1	3544.18	7988.15	1319.75	1.6391	0.71287	0.0027616	0.00834568	12187	13550	9120.96	11539.9	19174.2	8554.91	14497.8	16119.8	6444.21	5958.51	8533.75	10206.3	8253.05	8587.03	7817.96	8104.44
PC(16:1_20:4)	PC	M+Na	802.536	11.3948	C44 H78 O8 N1 P1 Na1	0.184088	589848	90429.9	658579	65894	0.89564	-0.15901	0.127808	0.186204	589780	636129	648156	561904	762691	506659	519166	494300	700398	669444	567604	757264	725927	599547	616131	632317
PC(14:0_22:5)	PC	M+H	780.554	14.2998	C44 H79 O8 N1 P1	0.063688	643076	147901	614553	95749.4	1.0464	0.065452	0.636502	0.703383	679512	640828	402264	660151	789161	538042	875612	559033	646490	502072	640957	546244	756507	580535	730728	512889
PC(36:5e)	PC	M+Na	788.556	11.028	C44 H80 O7 N1 P1 Na1	0.53664	223406	77914	522931	136654	0.42722	-1.227	0.000939106	0.00397777	297116	175812	220179	266893	310177	182443	260573	74055.4	395743	435538	640444	746454	365363	445883	519913	634110
PC(14:1e_22:4)	PC	M+H	766.575	15.18	C44 H81 O7 N1 P1	0.157681	66584.1	16158.7	35955.6	17827.1	1.8518	0.88896	0.0135873	0.0294907	49883.2	69782.7	84740.9	55041.1	64206.4	45661.2	91073.9	72283.4	22265.2	34842.7	54205	18875.4	64275.1	23252.6	20033.4	49895.7
PC(18:4_18:2)	PC	M+H	778.538	10.4512	C44 H77 O8 N1 P1	0.385484	114391	55594	284609	100642	0.40192	-1.315	0.0100817	0.023429	128987	178918	89231.3	136473	2001.85	85863.5	163975	129678	308177	361335	292567	352656	287228	342791	284938	47177.9
PC(14:0_22:6)	PC	M+Na	800.52	10.8532	C44 H76 O8 N1 P1 Na1	0.396089	528209	129492	724886	93489	0.72868	-0.45664	0.0100817	0.023429	398381	538738	344787	562199	649973	513242	746015	472340	719386	607207	749905	700331	691168	762659	919254	649180
PC(36:6)	PC	M+H	778.538	10.8532	C44 H77 O8 N1 P1	1.32636	7.86093e+06	2.12705e+06	1.04128e+07	1.57667e+06	0.75493	-0.40558	0.0313241	0.0589837	6.2606e+06	8.29431e+06	4.85965e+06	8.44958e+06	9.58872e+06	6.83627e+06	1.16861e+07	6.91218e+06	1.01506e+07	8.12607e+06	1.12316e+07	1.02691e+07	9.43576e+06	1.03941e+07	1.3628e+07	1.00668e+07
PC(36:6e)	PC	M+H	764.559	12.608	C44 H79 O7 N1 P1	1.9275	6.16871e+06	457039	9.45574e+06	490886	0.65238	-0.61622	0.000939106	0.00397777	6.88882e+06	6.31555e+06	5.46209e+06	6.32179e+06	6.32721e+06	5.57407e+06	6.31095e+06	6.14916e+06	9.89224e+06	8.65829e+06	9.01025e+06	9.48128e+06	9.14007e+06	1.01381e+07	9.73402e+06	9.59163e+06
PC(14:1e_22:5)	PC	M+H	764.559	14.9109	C44 H79 O7 N1 P1	0.239749	222199	39953	157337	13984.5	1.4123	0.498	0.00387604	0.0109285	262692	234079	207162	224881	266122	159959	250855	171846	184476	145531	157054	166293	161033	151104	154657	138548
PC(36:7)	PC	M+H	776.522	10.3529	C44 H75 O8 N1 P1	0.180268	115832	120242	45785.1	24352.1	2.5299	1.3391	0.874826	0.905144	170210	311862	158496	1867.39	6050.79	23266.1	237278	17624.5	49402.8	26659.7	89104.5	40064.4	65666.7	51464.8	9709.16	34208.8
PC(22:6_14:1)	PC	M+H	776.522	12.0121	C44 H75 O8 N1 P1	1.01344	3.21942e+06	312095	4.35547e+06	633912	0.73917	-0.43603	0.00194753	0.00637467	3.03312e+06	3.27298e+06	2.87511e+06	3.05253e+06	3.4064e+06	2.85997e+06	3.64251e+06	3.61271e+06	4.42548e+06	3.42594e+06	4.71748e+06	3.86118e+06	5.14889e+06	3.70526e+06	5.05929e+06	4.50025e+06
PC(36:7e)	PC	M+H	762.543	10.4908	C44 H77 O7 N1 P1	0.241059	21012	5026.93	98230.8	69383.7	0.2139	-2.225	0.00194753	0.00637467	16475.9	25186.6	23216.8	29785.6	14040	18194.6	20880.3	20316	169047	73614.9	225194	44260.4	24623.9	39278.6	99313.5	110514
PC(36:8)	PC	M+H	774.507	8.85129	C44 H73 O8 N1 P1	0.0417252	15310.8	5863.49	11524.3	3247.37	1.3286	0.40988	0.270149	0.348585	7408.81	13659.1	8710.6	19970.9	19319.3	14774.7	24875.2	13767.7	14952.2	8607.11	13937.6	10149.5	11073.1	11703	15618.2	6153.32
PC(37:0e)	PC	M+H	790.668	17.7797	C45 H93 O7 N1 P1	0.164242	46307	36100.7	89944	38875.5	0.51484	-0.9578	0.0239487	0.0468347	27833.1	21975.1	88838	34083.9	14270.2	115484	26380.4	41590.8	45669.1	100057	151915	103650	62043	73586.6	49851.4	132779
PC(37:1)	PC	M+H	802.632	16.0016	C45 H89 O8 N1 P1	3.06998	9.80082e+06	1.44116e+06	1.84836e+07	2.22643e+06	0.53025	-0.91527	0.000939106	0.00397777	1.01026e+07	9.94769e+06	1.17989e+07	1.01587e+07	1.08086e+07	7.07384e+06	1.00531e+07	8.46303e+06	1.85524e+07	1.82654e+07	1.78609e+07	2.14301e+07	1.63602e+07	1.84998e+07	1.52043e+07	2.16952e+07
PC(37:1e)	PC	M+H	788.653	18.4347	C45 H91 O7 N1 P1	0.102695	41200.7	43084.6	68370.3	39484.9	0.60261	-0.7307	0.189263	0.257782	18417.3	35426.1	142559	44474.4	8677.01	11814.8	25884.5	42351.8	36649.9	66580.5	93655	100531	23513.1	83559.5	16596.7	125877
PC(37:2)	PC	M+H	800.616	14.8597	C45 H87 O8 N1 P1	0.580357	3.0758e+06	982763	3.79105e+06	740709	0.81133	-0.30163	0.227147	0.301073	4.02143e+06	3.53083e+06	2.91879e+06	3.43778e+06	4.04706e+06	1.02973e+06	2.46895e+06	3.15186e+06	3.65631e+06	3.70204e+06	3.33973e+06	5.30152e+06	2.83775e+06	3.74571e+06	3.42261e+06	4.32272e+06
PC(17:1_20:1)	PC	M+H	800.616	16.8663	C45 H87 O8 N1 P1	0.365879	252055	47964.9	389734	50705.6	0.64674	-0.62875	0.00135938	0.00497765	288154	294313	222875	289954	272982	189199	281058	177908	407106	293345	394935	415589	367234	451117	353078	435466
PC(37:2e)	PC	M+H	786.637	17.1705	C45 H89 O7 N1 P1	0.0236947	491419	94646.5	482865	65590.8	1.0177	0.025333	0.874826	0.905144	504475	480323	386914	525730	513979	420228	687524	412177	440103	452752	557956	432641	533974	400843	580483	464168
PC(37:3)	PC	M+H	798.601	12.5122	C45 H85 O8 N1 P1	0.113731	77514.7	17926.9	106102	48352.5	0.73057	-0.4529	0.270149	0.348585	77331.8	63047.9	94294.1	100562	79437.8	44147.6	87390	73907	65864.7	161709	42482.7	181160	95569	134421	78053.9	89552.5
PC(19:1_18:2)	PC	M+H	798.601	15.8176	C45 H85 O8 N1 P1	0.669199	161546	50942.7	552830	38206.1	0.29222	-1.7749	0.000939106	0.00397777	198038	145967	121670	196246	140654	111588	257464	120743	577058	516838	541023	582621	549573	607359	487534	560637
PC(15:0_22:3)	PC	M+H	798.601	16.3465	C45 H85 O8 N1 P1	0.560651	501507	86192.1	209378	39192.2	2.3952	1.2602	0.000939106	0.00397777	690573	515732	418029	500058	497961	417617	458145	513939	245939	169518	157555	201541	263565	249612	189794	197499
PC(37:3e)	PC	M+H	784.621	17.4035	C45 H87 O7 N1 P1	0.0326069	55788.7	10544.3	51552.8	10080.9	1.0822	0.11392	0.494837	0.568203	73978.9	58382.6	46855.8	64780.8	45375.9	43499.6	59786	53650.2	57169.9	50322.2	64304.8	55722.3	40481	57152.3	33171.1	54099
PC(37:4)	PC	M+H	796.585	11.9843	C45 H83 O8 N1 P1	0.432224	994535	270788	1.28158e+06	178739	0.77602	-0.36583	0.0405689	0.0719971	1.40476e+06	917712	815818	810396	1.15421e+06	573794	1.25923e+06	1.02035e+06	1.20039e+06	1.29344e+06	1.09261e+06	1.58175e+06	1.48909e+06	1.31913e+06	1.08586e+06	1.1904e+06
PC(15:0_22:4)	PC	M+H	796.585	15.3625	C45 H83 O8 N1 P1	2.87198	1.29413e+07	2.24438e+06	5.34724e+06	542919	2.4202	1.2751	0.000939106	0.00397777	1.55591e+07	1.29804e+07	9.2306e+06	1.49758e+07	1.41403e+07	1.09533e+07	1.44406e+07	1.12499e+07	5.09118e+06	4.64501e+06	4.61668e+06	5.50213e+06	5.33137e+06	6.10966e+06	5.90736e+06	5.57455e+06
PC(37:4e)	PC	M+H	782.606	16.1919	C45 H85 O7 N1 P1	1.08631	2.08794e+06	695838	828494	156476	2.5202	1.3335	0.000939106	0.00397777	2.8756e+06	1.77893e+06	1.34886e+06	2.88092e+06	2.49061e+06	1.51092e+06	2.59407e+06	1.22357e+06	690494	762211	894756	994403	647591	942629	661480	1.03439e+06
PC(37:5)	PC	M+H	794.569	12.0595	C45 H81 O8 N1 P1	1.58865	5.69961e+06	892187	8.15313e+06	468954	0.69907	-0.51649	0.000939106	0.00397777	6.71264e+06	5.56135e+06	4.72577e+06	5.65996e+06	6.64239e+06	4.20394e+06	6.37074e+06	5.72008e+06	7.88564e+06	8.01085e+06	8.14812e+06	8.96117e+06	8.73528e+06	8.08694e+06	7.56055e+06	7.83651e+06
PC(15:0_22:5)	PC	M+H	794.569	14.9565	C45 H81 O8 N1 P1	6.07561	9.62579e+07	2.09084e+07	5.69897e+07	6.95903e+06	1.689	0.7562	0.0027616	0.00834568	1.08245e+08	1.04424e+08	5.96191e+07	9.2696e+07	1.21872e+08	7.46211e+07	1.15277e+08	9.33085e+07	6.32615e+07	4.09164e+07	5.81321e+07	5.96166e+07	5.70876e+07	6.00297e+07	6.15724e+07	5.53008e+07
PC(37:5e)	PC	M+H	780.59	15.5813	C45 H83 O7 N1 P1	0.715331	965411	217587	454341	86415.2	2.1249	1.0874	0.000939106	0.00397777	1.06477e+06	1.02533e+06	635942	1.06628e+06	1.19996e+06	752286	1.21031e+06	768409	591221	304003	542316	424005	444461	464096	455900	408728
PC(37:6)	PC	M+H	792.554	14.0125	C45 H79 O8 N1 P1	7.25166	1.20478e+08	1.71167e+07	1.72235e+08	1.44429e+07	0.6995	-0.5156	0.000939106	0.00397777	1.24085e+08	1.19101e+08	9.03461e+07	1.29936e+08	1.41622e+08	1.12683e+08	1.39116e+08	1.06938e+08	1.75644e+08	1.43688e+08	1.69947e+08	1.83559e+08	1.59247e+08	1.83785e+08	1.763e+08	1.85709e+08
PC(38:0)	PC	M+H	818.663	17.6311	C46 H93 O8 N1 P1	0.339407	708711	216364	908476	156109	0.78011	-0.35825	0.0831229	0.13017	1.12745e+06	696952	623319	781709	760751	517849	764883	396781	1.04805e+06	705532	1.07205e+06	871375	885221	691050	1.09268e+06	901849
PC(38:0e)	PC	M+Na	826.666	17.661	C46 H94 O7 N1 P1 Na1	0.259815	236621	83426.8	336950	68579.7	0.70224	-0.50996	0.0313241	0.0589837	299783	252902	124382	219162	279771	172281	379603	165081	280605	243581	336480	406592	275017	412722	323516	417086
PC(38:1)	PC	M+H	816.648	16.5561	C46 H91 O8 N1 P1	1.99952	2.16826e+07	4.25493e+06	2.73202e+07	3.63684e+06	0.79365	-0.33343	0.0135873	0.0294907	2.53957e+07	2.4592e+07	1.92235e+07	2.11269e+07	2.52795e+07	1.52452e+07	2.59603e+07	1.6638e+07	3.1143e+07	2.1168e+07	2.89675e+07	3.2317e+07	2.55295e+07	2.84996e+07	2.47661e+07	2.61712e+07
PC(38:2)	PC	M+H	814.632	15.9897	C46 H89 O8 N1 P1	0.0390758	2.21901e+06	918531	2.17535e+06	612454	1.0201	0.028664	0.494837	0.568203	2.70491e+06	2.91167e+06	1.59167e+06	2.32879e+06	3.04586e+06	255858	2.71532e+06	2.19799e+06	2.47838e+06	2.14005e+06	1.73667e+06	2.87411e+06	1.19282e+06	1.5888e+06	2.68283e+06	2.70918e+06
PC(20:2e_18:0)	PC	M+Na	822.635	16.4284	C46 H90 O7 N1 P1 Na1	0.232746	70957.2	32840.2	137116	39162.4	0.5175	-0.95038	0.00538494	0.0143212	55321.7	139090	23944.3	77795.9	78073.1	54985.7	76083.7	62363.3	130673	93802.3	188540	164555	114491	115492	98177	191201
PC(38:3)	PC	M+H	812.616	14.1395	C46 H87 O8 N1 P1	3.49357	4.3548e+07	7.17099e+06	3.04819e+07	2.06501e+06	1.4287	0.51465	0.000939106	0.00397777	4.75553e+07	5.47559e+07	4.91733e+07	3.68544e+07	4.22632e+07	4.67679e+07	3.50055e+07	3.60084e+07	3.25737e+07	2.86321e+07	3.20624e+07	3.2324e+07	3.17291e+07	2.7554e+07	3.09157e+07	2.80642e+07
PC(20:3e_18:0)	PC	M+H	798.637	15.1325	C46 H89 O7 N1 P1	0.724384	148899	77569.5	632568	126378	0.23539	-2.0869	0.000939106	0.00397777	237465	236840	60316.6	132137	94639.5	54221	146068	229508	575302	534151	779040	714937	513933	620999	495624	826562
PC(38:3e)	PC	M+H	798.637	15.5616	C46 H89 O7 N1 P1	0.4266	748466	199564	508650	74353.2	1.4715	0.55726	0.00740553	0.0183503	1.01095e+06	597583	538774	826975	946428	541901	927981	597138	581484	441182	537236	432242	633314	528998	479423	435319
PC(20:2_18:2)	PC	M+H	810.601	9.023	C46 H85 O8 N1 P1	0.0187569	158.53	115.225	1076.8	2000.95	0.14722	-2.7639	1	1	203.895	329.539	154.054	264.979	161.042	154.728	4.07469e-06	4.07469e-06	2573.65	382.274	86.9261	6.17179	4.07469e-06	5524.8	40.5598	4.07469e-06
PC(16:1_22:3)	PC	M+H	810.601	14.8222	C46 H85 O8 N1 P1	2.13106	8.08925e+06	4.36535e+06	2.44611e+06	1.12108e+06	3.307	1.7255	0.000939106	0.00397777	6.57778e+06	7.70919e+06	5.1074e+06	6.35003e+06	7.11631e+06	1.87367e+07	6.40752e+06	6.70903e+06	1.91085e+06	875065	3.03378e+06	4.56974e+06	2.29178e+06	2.3257e+06	3.02096e+06	1.54103e+06
PC(28:0_10:4)	PC	M+H	810.601	18.5917	C46 H85 O8 N1 P1	0.0660606	229355	266222	287929	641291	0.79657	-0.32813	0.270149	0.348585	92080.3	21621.7	551689	140047	745040	117464	108128	58768.2	134094	26943.6	1.87245e+06	48498.3	96329	26177	49267.6	49666.9
PC(26:1_12:3)	PC	M+H	810.601	22.67	C46 H85 O8 N1 P1	0.0124464	21866	11774.7	20174.3	11268	1.0839	0.11617	0.713191	0.769972	30943.9	18280.6	26369.5	12912.9	11462.4	4486.91	37110.3	33361.2	29840.3	6664.66	33351.6	10916.2	13688.9	23085.1	34106.6	9741.48
PC(27:1_11:3)	PC	M+H	810.601	26.119	C46 H85 O8 N1 P1	0.055475	3639.34	2314.72	9088.01	7110.84	0.40046	-1.3203	0.0313241	0.0589837	6246.25	1522.45	7042.07	3464.98	653.97	4019.9	4654.54	1510.6	25025.3	2466.71	12317.7	7367.3	3377.22	8116.3	7556.43	6477.23
PC(38:5)	PC	M+H	808.585	13.2642	C46 H83 O8 N1 P1	8.16592	1.86144e+08	3.88727e+07	1.13315e+08	2.03282e+07	1.6427	0.71607	0.00194753	0.00637467	1.85554e+08	2.01048e+08	1.18778e+08	1.71592e+08	2.29409e+08	1.6649e+08	2.42631e+08	1.73648e+08	1.33319e+08	9.43571e+07	1.14624e+08	1.03954e+08	1.17867e+08	1.04931e+08	1.49508e+08	8.79623e+07
PC(38:5e)	PC	M+H	794.606	14.7079	C46 H85 O7 N1 P1	0.86499	6.78031e+06	1.1625e+06	5.62705e+06	602826	1.2049	0.26897	0.0405689	0.0719971	6.83743e+06	6.4295e+06	5.11689e+06	7.36901e+06	7.24338e+06	5.49283e+06	8.86254e+06	6.89093e+06	5.55511e+06	4.85219e+06	6.43954e+06	6.29337e+06	5.62816e+06	6.06727e+06	5.26966e+06	4.91111e+06
PC(16:1_22:5)	PC	M+H	806.569	16.7671	C46 H81 O8 N1 P1	0.0563737	74586.7	34764.2	88071.2	35376.3	0.84689	-0.23975	0.713191	0.769972	103256	57104.7	111914	15085	48236.3	93620.7	107970	59506.5	135387	35273.7	98036.2	133553	49039.5	84901.6	83074.4	85304.2
PC(38:6e)	PC	M+H	792.59	13.1169	C46 H83 O7 N1 P1	3.76862	6.2103e+07	8.4659e+06	8.00245e+07	1.20555e+07	0.77605	-0.36578	0.00538494	0.0143212	5.69601e+07	6.48893e+07	5.3191e+07	6.52952e+07	6.43048e+07	6.18713e+07	7.84666e+07	5.18461e+07	7.45854e+07	7.49342e+07	8.58875e+07	7.16163e+07	8.33651e+07	7.66551e+07	1.05921e+08	6.72318e+07
PC(16:1_22:6)	PC	M+Na	826.536	11.0711	C46 H78 O8 N1 P1 Na1	1.19313	1.6221e+06	433152	3.00123e+06	351627	0.54048	-0.88769	0.000939106	0.00397777	1.35288e+06	1.58835e+06	845456	1.83633e+06	1.98378e+06	1.42122e+06	2.26703e+06	1.68176e+06	3.07918e+06	2.77181e+06	2.98062e+06	2.93865e+06	3.37983e+06	2.80406e+06	3.58409e+06	2.4716e+06
PC(18:3_20:4)	PC	M+Na	826.536	11.4302	C46 H78 O8 N1 P1 Na1	0.514799	982169	179831	669979	133766	1.466	0.55186	0.00387604	0.0109285	923405	1.18544e+06	612554	1.00145e+06	1.14704e+06	995081	1.08804e+06	904337	689104	539917	722311	516668	904268	584855	795221	607486
PC(38:7e)	PC	M+H	790.575	12.8693	C46 H81 O7 N1 P1	8.88933	1.00541e+08	1.90989e+07	1.75028e+08	1.80552e+07	0.57443	-0.7998	0.000939106	0.00397777	8.98683e+07	1.0366e+08	7.87656e+07	1.08649e+08	1.15893e+08	8.73383e+07	1.35552e+08	8.46011e+07	1.78949e+08	1.54597e+08	1.87858e+08	1.68844e+08	1.56916e+08	1.78091e+08	2.09829e+08	1.65142e+08
PC(38:8)	PC	M+H	802.538	10.8854	C46 H77 O8 N1 P1	0.519441	120569	24318.6	395736	133482	0.30467	-1.7147	0.000939106	0.00397777	144374	153052	86344.4	113784	125807	101680	141147	98367.9	332241	379354	327957	658606	246479	491040	282977	447235
PC(38:8e)	PC	M+H	788.559	11.9914	C46 H79 O7 N1 P1	1.79141	5.76066e+06	1.63781e+06	2.38067e+06	845505	2.4198	1.2749	0.00194753	0.00637467	5.47701e+06	6.07205e+06	2.71514e+06	5.7003e+06	6.59776e+06	4.90091e+06	8.55066e+06	6.07144e+06	2.26917e+06	1.9215e+06	2.61474e+06	1.47859e+06	4.02753e+06	2.33995e+06	2.94897e+06	1.44494e+06
PC(38:9)	PC	M+H	800.522	10.836	C46 H75 O8 N1 P1	0.395274	528209	129492	724295	93230.6	0.72927	-0.45547	0.0100817	0.023429	398381	538738	344787	562199	649973	513242	746015	472340	719386	607207	749905	700331	691168	757929	919254	649180
PC(39:0)	PC	M+H	832.679	17.8742	C47 H95 O8 N1 P1	0.215499	42984	29689	96127.9	20035.2	0.44715	-1.1612	0.00740553	0.0183503	38219.7	111688	25171	32919.9	52838.1	21988.5	39468.1	21578.7	101451	73061.9	119876	97161.8	80404.3	74859.4	94729.6	127479
PC(18:1_21:0)	PC	M+H	830.663	18.6504	C47 H93 O8 N1 P1	0.414434	95304.7	17089.7	255626	50597.6	0.37283	-1.4234	0.000939106	0.00397777	104741	101877	82911.7	119811	105077	86811.5	97309.6	63898.3	332759	182063	248337	189538	288124	257866	288376	257947
PC(18:1_21:1)	PC	M+H	828.648	17.8206	C47 H91 O8 N1 P1	0.291967	58038.6	19816.6	139375	23325.1	0.41642	-1.2639	0.000939106	0.00397777	81633.7	60911.5	27355.9	75405.1	68879.8	39499	70556.1	40067.9	165275	103864	126061	116003	163233	143004	134748	162811
PC(39:2)	PC	M+H	828.648	18.27	C47 H91 O8 N1 P1	0.103647	244621	44651.5	270002	21323.8	0.906	-0.14242	0.372029	0.452003	256468	280074	173107	274336	276593	181596	282306	232487	273895	253202	283893	299948	271079	232029	260047	285926
PC(39:2e)	PC	M+H	814.668	17.8553	C47 H93 O7 N1 P1	0.390312	1.68165e+06	2.25032e+06	2.40214e+06	1.93203e+06	0.70007	-0.51444	0.270149	0.348585	6.7989e+06	133359	58592	754535	143818	1.3053e+06	1.6483e+06	2.61042e+06	4.51906e+06	5.10641e+06	1.83813e+06	4.20139e+06	457326	1.13316e+06	160330	1.80127e+06
PC(39:3e)	PC	M+H	812.653	18.5093	C47 H91 O7 N1 P1	5.51282	1.47938e+08	2.13214e+07	1.83002e+08	1.1165e+07	0.8084	-0.30687	0.00387604	0.0109285	1.53634e+08	1.62513e+08	1.15907e+08	1.4733e+08	1.72558e+08	1.22383e+08	1.71373e+08	1.37809e+08	1.84837e+08	1.66465e+08	1.9961e+08	1.94783e+08	1.78355e+08	1.82155e+08	1.86821e+08	1.70993e+08
PC(39:4)	PC	M+H	824.616	14.7692	C47 H87 O8 N1 P1	5.11759	7.52796e+06	1.00563e+06	3.0071e+07	1.8674e+06	0.25034	-1.998	0.000939106	0.00397777	8.11086e+06	7.61026e+06	6.91788e+06	7.43885e+06	8.22773e+06	6.10232e+06	9.23857e+06	6.57717e+06	2.80506e+07	2.90563e+07	2.98598e+07	3.19888e+07	3.15622e+07	2.89347e+07	2.81506e+07	3.29647e+07
PC(39:4e)	PC	M+H	810.637	17.2942	C47 H89 O7 N1 P1	0.331284	217941	62429.4	99410.5	30152.1	2.1923	1.1325	0.00194753	0.00637467	233962	190828	122316	307611	284183	181084	252285	171257	102130	72907.2	116434	133123	50878.4	112561	74780.2	132470
PC(39:5)	PC	M+H	822.601	13.9583	C47 H85 O8 N1 P1	0.348645	2.92194e+06	784425	3.2889e+06	518561	0.88843	-0.17068	0.318425	0.399191	2.84816e+06	2.8508e+06	1.97158e+06	2.66121e+06	4.01625e+06	2.32646e+06	4.18901e+06	2.51205e+06	3.67948e+06	2.64728e+06	3.81426e+06	3.08684e+06	3.87225e+06	2.7095e+06	3.65228e+06	2.84931e+06
PC(39:5e)	PC	M+H	808.621	17.134	C47 H87 O7 N1 P1	0.956489	1.28985e+06	225780	453164	86963.8	2.8463	1.5091	0.000939106	0.00397777	1.36579e+06	1.15203e+06	968646	1.67855e+06	1.27457e+06	1.09794e+06	1.49173e+06	1.28951e+06	419522	424445	442063	602158	331133	517670	375439	512882
PC(17:1_22:5)	PC	M+H	820.585	11.5173	C47 H83 O8 N1 P1	0.682406	428739	184417	924179	208166	0.46391	-1.1081	0.0027616	0.00834568	716493	350471	176573	420169	450102	258692	663090	394320	886002	712625	622572	1.23624e+06	1.0004e+06	1.05061e+06	790332	1.09466e+06
PC(39:6)	PC	M+H	820.585	12.9615	C47 H83 O8 N1 P1	4.34092	9.62745e+06	1.90099e+06	2.75034e+07	6.2464e+06	0.35005	-1.5144	0.000939106	0.00397777	8.99804e+06	1.00245e+07	6.03134e+06	1.02404e+07	1.07813e+07	9.44858e+06	1.26921e+07	8.80331e+06	3.15454e+07	2.1047e+07	3.36292e+07	1.96251e+07	3.21227e+07	2.15954e+07	3.49421e+07	2.55205e+07
PC(17:1_22:6)	PC	M+Na	840.551	11.7372	C47 H80 O8 N1 P1 Na1	0.407833	160605	37231.7	332410	80076.8	0.48315	-1.0494	0.00135938	0.00497765	128101	141636	105973	191323	157133	161085	225041	174551	400819	253263	416030	216875	376660	275943	418792	300895
PC(39:7)	PC	M+H	818.569	11.7372	C47 H81 O8 N1 P1	3.1315	3.64187e+06	897255	1.23644e+07	1.6923e+06	0.29455	-1.7634	0.000939106	0.00397777	3.20151e+06	3.0347e+06	3.13805e+06	3.87721e+06	3.86971e+06	2.68306e+06	5.5866e+06	3.74414e+06	1.3817e+07	9.40031e+06	1.25896e+07	1.16946e+07	1.35035e+07	1.04577e+07	1.36535e+07	1.37987e+07
PC(40:0)	PC	M+H	846.695	18.4387	C48 H97 O8 N1 P1	0.350012	387919	77915.1	530187	61166.5	0.73167	-0.45074	0.0027616	0.00834568	432096	499157	390423	406729	447224	300020	366742	260963	547667	538464	580835	499703	452668	438915	576910	606332
PC(40:0e)	PC	M+H	832.715	18.9269	C48 H99 O7 N1 P1	0.137595	100247	24806.9	130593	26672	0.76763	-0.38152	0.0831229	0.13017	98744.4	107820	72459.5	142599	109253	107263	102895	60942.4	135308	124218	131930	172504	94070.1	125759	100468	160489
PC(16:0_24:1)	PC	M+Na	866.661	17.5557	C48 H94 O8 N1 P1 Na1	0.2595	81339.9	16371.5	149977	29550.3	0.54235	-0.88271	0.000939106	0.00397777	91510.8	87243.5	66053.1	88931.6	92429.3	58931.7	103023	62596.8	167738	118771	214018	134135	143806	131607	149529	140216
PC(40:10)	PC	M+H	826.538	9.42275	C48 H77 O8 N1 P1	0.341383	6909.32	2759.69	109562	19337.2	0.063063	-3.9871	0.000939106	0.00397777	6079.09	7917.25	3080.04	7448.99	7724.42	5673.34	12432	4919.46	109587	74643.4	121416	117536	86704	121749	132226	112632
PC(40:1e)	PC	M+H	830.7	18.1547	C48 H97 O7 N1 P1	0.488779	654843	118061	926149	135452	0.70706	-0.50009	0.00194753	0.00637467	725177	705055	646566	785299	618969	513055	779643	464982	878626	899500	1.08974e+06	884158	878544	773457	829854	1.17531e+06
PC(40:2e)	PC	M+H	828.684	18.7892	C48 H95 O7 N1 P1	0.43655	994401	260271	1.27341e+06	135855	0.7809	-0.3568	0.0239487	0.0468347	1.23336e+06	1.13451e+06	536282	1.01108e+06	1.0646e+06	759274	1.33306e+06	883036	1.44569e+06	1.03739e+06	1.36837e+06	1.34995e+06	1.35675e+06	1.22564e+06	1.13305e+06	1.27044e+06
PC(40:3)	PC	M+Na	862.63	15.02	C48 H90 O8 N1 P1 Na1	5.44578	3.5879e+06	615243	2.96045e+07	4.563e+06	0.12119	-3.0446	0.000939106	0.00397777	3.56149e+06	4.37133e+06	2.56381e+06	3.79559e+06	4.2223e+06	3.02023e+06	3.91479e+06	3.25365e+06	3.28733e+07	2.15153e+07	3.64251e+07	2.70531e+07	2.75481e+07	2.84707e+07	3.00465e+07	3.29042e+07
PC(40:3e)	PC	M+H	826.668	17.163	C48 H93 O7 N1 P1	0.175565	281779	40209	327800	29510.6	0.85961	-0.21825	0.0313241	0.0589837	260380	280888	229506	292619	306960	244283	359026	280569	299066	293248	365510	355685	340116	289942	336074	342758
PC(18:2e_22:2)	PC	M+Na	846.635	16.1828	C48 H90 O7 N1 P1 Na1	0.0262703	89131.9	18421.1	93517	16053.8	0.95311	-0.069287	0.636502	0.703383	77820.5	104629	57711	116164	89766.3	77002.1	88927.2	101035	75582.8	93807.3	112821	120097	80831	93004.3	77969.7	94021.7
PC(40:5)	PC	M+H	836.616	15.1386	C48 H87 O8 N1 P1	0.804897	3.93137e+06	991789	2.84464e+06	971642	1.382	0.46679	0.0660819	0.107911	4.66804e+06	4.39921e+06	2.37939e+06	3.35886e+06	5.14894e+06	2.82847e+06	4.76088e+06	3.90717e+06	4.77757e+06	1.71219e+06	2.54984e+06	2.43323e+06	3.79312e+06	2.59745e+06	2.6151e+06	2.27861e+06
PC(29:1_11:4)	PC	M+Na	858.598	16.0646	C48 H86 O8 N1 P1 Na1	0.0873524	58981.6	23253.8	41705.6	22067.4	1.4142	0.50002	0.189263	0.257782	13408	57334.6	42859.5	73225.3	50305.7	80288.5	72291.7	82139.5	31498.2	17179.7	45966.3	60195.6	39372.3	44861.6	80940.9	13630.2
PC(40:5e)	PC	M+H	822.637	15.9585	C48 H89 O7 N1 P1	0.26819	616501	119092	497068	92029.5	1.2403	0.31066	0.0660819	0.107911	630199	683537	478524	714979	640323	395270	740185	648989	393935	431777	535671	650300	430577	512229	426246	595808
PC(40:6)	PC	M+H	834.601	13.6738	C48 H85 O8 N1 P1	10.8451	5.6096e+08	6.72661e+07	6.93138e+08	5.26663e+07	0.8093	-0.30525	0.00387604	0.0109285	5.46201e+08	6.18644e+08	4.53045e+08	5.68192e+08	6.54085e+08	5.18626e+08	6.18945e+08	5.09938e+08	7.48649e+08	5.98192e+08	7.24214e+08	7.3886e+08	6.92952e+08	7.01634e+08	7.09979e+08	6.30624e+08
PC(20:3_20:3)	PC	M+Na	856.583	15.7518	C48 H84 O8 N1 P1 Na1	0.251126	75890.9	17868.2	140664	27381.8	0.53952	-0.89026	0.000939106	0.00397777	66638.6	88372.1	46629.7	63504.5	98411.9	71756.8	74527.5	97285.8	170530	113366	142362	119046	166261	138695	172613	102439
PC(40:6e)	PC	M+H	820.621	13.9544	C48 H87 O7 N1 P1	0.1933	1.10696e+06	246300	991023	181671	1.117	0.15961	0.372029	0.452003	1.03272e+06	1.00992e+06	1.02571e+06	1.00007e+06	1.35373e+06	865549	1.6079e+06	960068	943152	968999	898382	1.20525e+06	1.17566e+06	911654	1.15859e+06	666503
PC(40:7)	PC	M+H	832.585	12.8434	C48 H83 O8 N1 P1	2.11224	8.4824e+06	1.56804e+06	4.10879e+06	1.00368e+06	2.0645	1.0458	0.00135938	0.00497765	8.7802e+06	1.06538e+07	5.46523e+06	9.93015e+06	8.64319e+06	8.76593e+06	8.12552e+06	7.49517e+06	3.26679e+06	3.12598e+06	4.13331e+06	5.33516e+06	4.42256e+06	2.9085e+06	5.63482e+06	4.04324e+06
PC(40:7e)	PC	M+H	818.606	14.2573	C48 H85 O7 N1 P1	3.81613	1.28951e+07	3.26133e+06	2.66258e+07	3.59146e+06	0.48431	-1.046	0.000939106	0.00397777	1.17705e+07	1.23029e+07	7.05255e+06	1.39351e+07	1.61315e+07	1.19841e+07	1.7952e+07	1.20318e+07	2.9482e+07	2.26253e+07	3.33663e+07	2.66814e+07	2.27404e+07	2.70446e+07	2.67645e+07	2.43021e+07
PC(40:8)	PC	M+H	830.569	12.511	C48 H81 O8 N1 P1	0.914395	547239	88853.4	1.30288e+06	176312	0.42002	-1.2515	0.000939106	0.00397777	483194	572532	448588	559195	662367	485173	685709	481154	1.22669e+06	1.2643e+06	1.558e+06	1.54595e+06	1.02095e+06	1.27766e+06	1.22533e+06	1.30418e+06
PC(40:8e)	PC	M+H	816.59	12.9235	C48 H83 O7 N1 P1	2.89393	1.48589e+07	3.21597e+06	2.43171e+07	5.2822e+06	0.61105	-0.71064	0.00538494	0.0143212	1.34976e+07	1.50458e+07	9.12201e+06	1.57091e+07	1.83533e+07	1.34947e+07	1.957e+07	1.40787e+07	2.9231e+07	1.94716e+07	2.7666e+07	1.77965e+07	2.7876e+07	2.39903e+07	3.06233e+07	1.78818e+07
PC(40:9)	PC	M+H	828.554	10.2759	C48 H79 O8 N1 P1	1.58841	647128	153514	2.88362e+06	443173	0.22442	-2.1558	0.000939106	0.00397777	611131	651534	413111	735772	774172	489184	889513	612606	2.97014e+06	2.30486e+06	3.3989e+06	3.1366e+06	2.17243e+06	2.73975e+06	3.10708e+06	3.2392e+06
PC(40:9e)	PC	M+H	814.575	12.0623	C48 H81 O7 N1 P1	0.929947	940911	207556	2.80252e+06	3.24873e+06	0.33574	-1.5746	0.156254	0.220027	1.01562e+06	817890	515593	1.08626e+06	980887	905149	1.21118e+06	994707	986870	1.01621e+06	1.27717e+06	904808	1.39672e+06	7.20089e+06	8.81952e+06	818016
PC(25:0_16:0)	PC	M+H	860.71	18.7929	C49 H99 O8 N1 P1	0.0795283	65893.4	40036.3	84349.4	21774.1	0.7812	-0.35624	0.189263	0.257782	57561.4	49368.3	139964	23215.6	36237.7	97334.6	32859.1	90606.4	95857.6	75053.2	96978.2	58811.9	109951	57404.3	69945.1	110794
PC(41:0e)	PC	M+H	846.731	18.0396	C49 H101 O7 N1 P1	0.106944	15387.7	6155.67	34874.6	24668.5	0.44123	-1.1804	0.0520296	0.0879514	7082.56	16130.5	22328.2	8415.8	22925.3	10245.4	19029.1	16944.5	22098.5	75686.1	15742.2	70849.3	27423.3	31669.4	25489.9	10038.2
PC(41:1)	PC	M+H	858.695	18.0671	C49 H97 O8 N1 P1	0.457703	79449.8	14616.6	267206	42660.4	0.29734	-1.7498	0.000939106	0.00397777	96761.2	78090.4	82275.7	86650.5	85752.1	60937.1	90689.4	54442.1	303353	226698	341556	232803	274990	213269	267254	277725
PC(41:2)	PC	M+H	856.679	18.27	C49 H95 O8 N1 P1	0.306791	401346	664723	764345	1.00891e+06	0.52509	-0.92938	0.318425	0.399191	1.85698e+06	68323	44229.9	49777.5	107089	42288.3	92137.7	949945	72743.1	82535.7	1.21294e+06	2.36649e+06	55232.9	85433.8	2.16796e+06	71424.7
PC(41:3)	PC	M+H	854.663	14.9757	C49 H93 O8 N1 P1	0.209624	46679.6	25672.3	93676.1	7583.19	0.49831	-1.0049	0.00740553	0.0183503	49255.9	40035.6	14752	46616.8	42088.7	23372.9	57049.1	100266	103965	82994.2	95812.4	93332	102960	95223.8	84867.9	90253.4
PC(20:3_21:0)	PC	M+H	854.663	18.207	C49 H93 O8 N1 P1	0.104784	10007.5	5674.52	23328.6	8424.82	0.42898	-1.221	0.0100817	0.023429	5474.89	5471.45	3460.02	15223.8	11581.6	9805.2	8566.32	20476.8	20291.1	11043	31303.1	10767.2	30695.6	25601.1	27215.3	29712.5
PC(41:3e)	PC	M+H	840.684	18.5282	C49 H95 O7 N1 P1	0.090686	1.64259e+07	3.03079e+06	1.66106e+07	2.06641e+06	0.98888	-0.016131	0.713191	0.769972	1.69004e+07	2.07642e+07	1.17505e+07	1.60524e+07	1.84214e+07	1.23594e+07	1.77736e+07	1.73852e+07	1.47739e+07	1.60816e+07	1.56474e+07	1.95261e+07	1.42243e+07	1.59065e+07	1.68656e+07	1.98592e+07
PC(41:4)	PC	M+H	852.648	16.0276	C49 H91 O8 N1 P1	0.408037	198746	30175.5	355803	46745.8	0.55859	-0.84015	0.000939106	0.00397777	191516	204982	196386	225516	220196	142474	235017	173881	367731	292819	372624	341036	403718	338430	302111	427951
PC(20:4_21:0)	PC	M+H	852.648	17.8577	C49 H91 O8 N1 P1	0.370874	99135.9	19594	235175	56738.7	0.42154	-1.2463	0.000939106	0.00397777	137883	103283	99931.8	88909.8	102896	85779.2	104325	70079.4	285223	178699	246580	196758	217829	215995	192319	347999
PC(41:4e)	PC	M+H	838.668	18.5139	C49 H93 O7 N1 P1	0.500968	1.28086e+06	160179	1.56276e+06	86355.1	0.81962	-0.28698	0.0027616	0.00834568	1.24264e+06	1.52122e+06	1.21785e+06	1.3699e+06	1.46962e+06	1.08236e+06	1.24086e+06	1.10242e+06	1.63767e+06	1.56883e+06	1.49558e+06	1.58253e+06	1.49346e+06	1.47073e+06	1.72717e+06	1.52608e+06
PC(41:5)	PC	M+H	850.632	14.775	C49 H89 O8 N1 P1	2.13105	863668	222139	4.77948e+06	342649	0.1807	-2.4683	0.000939106	0.00397777	880641	751373	705409	857826	1.05582e+06	679672	1.30954e+06	669069	4.90964e+06	4.12062e+06	5.0702e+06	5.2115e+06	4.8943e+06	4.85326e+06	4.65076e+06	4.52558e+06
PC(41:5e)	PC	M+Na	858.635	16.9598	C49 H90 O7 N1 P1 Na1	0.173729	78394.8	16853.7	116391	26133.9	0.67355	-0.57015	0.00740553	0.0183503	81781.1	65459.7	67794.3	105359	72363.4	60372	102185	71843.5	104177	134824	113582	157575	76512.6	128933	89168.7	126353
PC(41:6)	PC	M+H	848.616	14.3442	C49 H87 O8 N1 P1	7.60065	5.48217e+06	1.11139e+06	5.64666e+07	9.95454e+06	0.097087	-3.3646	0.000939106	0.00397777	5.00331e+06	5.54364e+06	3.83285e+06	5.67806e+06	6.75755e+06	4.92643e+06	7.29401e+06	4.82152e+06	6.13849e+07	4.50592e+07	6.64936e+07	4.41873e+07	6.08175e+07	4.74504e+07	7.01671e+07	5.61732e+07
PC(41:7)	PC	M+H	846.601	12.9978	C49 H85 O8 N1 P1	1.07226	548991	89071.7	1.58342e+06	242911	0.34671	-1.5282	0.000939106	0.00397777	509388	531600	414146	605787	656278	533545	669523	471663	1.64887e+06	1.36736e+06	1.93945e+06	1.28706e+06	1.67731e+06	1.41237e+06	1.88576e+06	1.44923e+06
PC(42:10)	PC	M+H	854.569	12.15	C50 H81 O8 N1 P1	0.426559	616337	110152	412603	70042.9	1.4938	0.57896	0.00387604	0.0109285	652221	731048	428797	592838	732807	537613	713549	541826	481448	379161	312607	443901	454574	410053	498194	320889
PC(42:10e)	PC	M+H	840.59	11.426	C50 H83 O7 N1 P1	0.129234	69929.5	19586.3	47036.8	9385.03	1.4867	0.57211	0.0100817	0.023429	57835.5	59592	65605.9	68893.7	92523.1	63509.2	105682	45794.2	51871.3	40143.2	42643.8	60434.6	46212.3	30791.7	48160	56037.5
PC(42:11)	PC	M+H	852.554	11.1596	C50 H79 O8 N1 P1	0.607435	1.95835e+06	956252	1.28536e+06	82753.7	1.5236	0.60747	0.270149	0.348585	1.30169e+06	1.33996e+06	3.16391e+06	3.16989e+06	1.63611e+06	2.93354e+06	1.05102e+06	1.07066e+06	1.32485e+06	1.21686e+06	1.33943e+06	1.41231e+06	1.18318e+06	1.33342e+06	1.28693e+06	1.1859e+06
PC(42:1e)	PC	M+H	858.731	18.7992	C50 H101 O7 N1 P1	0.0956178	89642.7	14209.7	107149	22427.4	0.83662	-0.25736	0.0831229	0.13017	90479.8	81665.1	86662.9	110589	72493.8	111646	81438.8	82166.1	100720	93733.1	94679.7	143645	94102.6	113776	80022.9	136513
PC(18:1_24:1)	PC	M+H	870.695	19.038	C50 H97 O8 N1 P1	0.00501002	65818.9	50605.1	67116.5	31037	0.98067	-0.028167	0.792896	0.837939	56365.2	94530.9	20177.3	52562.9	147979	1822.24	119435	33678.7	47897.1	40689.2	28091.6	55197.9	77063.6	68587.6	121577	97827.7
PC(42:2e)	PC	M+H	856.715	18.117	C50 H99 O7 N1 P1	0.0967562	82309.9	18262.2	103199	33447.7	0.79758	-0.32629	0.189263	0.257782	73280.7	83516.1	99422.6	113805	70207.6	62849.5	91825.4	63572.6	76637.3	111173	113768	163311	65788.9	102327	65951.8	126638
PC(42:3)	PC	M+H	868.679	17.1021	C50 H95 O8 N1 P1	0.184725	63602.8	15947.1	103426	23047.4	0.61496	-0.70144	0.00387604	0.0109285	81894.8	49198.2	54372.3	85043.2	53812	51882.3	81231	51388.2	117494	82904.3	147482	90566.7	119505	89213.5	99563.8	80678.7
PC(42:3e)	PC	M+H	854.7	17.3777	C50 H97 O7 N1 P1	0.143566	113357	13815.6	149894	48289	0.75625	-0.40307	0.0660819	0.107911	127741	125273	96359.6	108400	128133	112902	92170.9	115875	119499	143830	241633	157754	128860	197420	95960.1	114196
PC(31:0_11:4)	PC	M+Na	888.645	16.0104	C50 H92 O8 N1 P1 Na1	0.00711883	64234.4	13338.7	65824.3	42060.1	0.97585	-0.035273	0.494837	0.568203	43417.9	61523.5	77973.2	52256.1	73569	53890.9	78708	72537	44339.6	63471	33698.7	49229.3	159649	86365.6	60885	28955.9
PC(42:4)	PC	M+H	866.663	16.269	C50 H93 O8 N1 P1	0.0862274	592921	165155	552380	100288	1.0734	0.10218	0.270149	0.348585	665373	668151	358454	696206	733906	385129	776285	459865	599219	367098	654937	540476	658713	545484	599123	453986
PC(42:4e)	PC	M+H	852.684	17.2932	C50 H95 O7 N1 P1	0.248728	227528	28529.6	159891	29234.9	1.423	0.50896	0.00387604	0.0109285	208560	253941	200111	251322	268629	190711	234534	212416	141503	139306	213291	184783	144296	135557	138815	181575
PC(42:5)	PC	M+H	864.648	15.869	C50 H91 O8 N1 P1	0.862904	1.66651e+06	476630	2.57359e+06	508914	0.64754	-0.62695	0.00740553	0.0183503	1.73137e+06	1.87672e+06	915089	1.62744e+06	1.96969e+06	1.18335e+06	2.46616e+06	1.56225e+06	2.99756e+06	1.84908e+06	3.16101e+06	2.33729e+06	2.66879e+06	2.27969e+06	3.19583e+06	2.09948e+06
PC(42:5e)	PC	M+H	850.668	16.0866	C50 H93 O7 N1 P1	0.156664	934964	218282	847360	156658	1.1034	0.14194	0.372029	0.452003	976528	752537	725946	1.27588e+06	1.09452e+06	816423	1.14096e+06	696915	797761	743841	1.07525e+06	933565	662965	857468	673658	1.03437e+06
PC(20:3_22:3)	PC	M+Na	884.614	5.12756	C50 H88 O8 N1 P1 Na1	0.0803752	47581.3	5592.3	39359.5	3981.78	1.2089	0.27368	0.00538494	0.0143212	44469	49491.2	44208.2	52083.4	51587.4	38878.3	55915	44018.3	41708.3	36031.8	35315.2	42200.3	39285.5	43721.3	33371.2	43242.2
PC(42:6)	PC	M+H	862.632	14.9008	C50 H89 O8 N1 P1	5.42344	3.61413e+06	647705	2.93924e+07	4.42788e+06	0.12296	-3.0237	0.000939106	0.00397777	3.56149e+06	4.37133e+06	2.6643e+06	3.79564e+06	4.40457e+06	3.1124e+06	4.01328e+06	2.99e+06	3.11715e+07	2.15156e+07	3.64317e+07	2.70534e+07	2.75483e+07	2.84682e+07	3.0047e+07	3.29034e+07
PC(42:6e)	PC	M+H	848.653	15.7591	C50 H91 O7 N1 P1	0.636784	1.54223e+06	301111	2.12358e+06	510178	0.72624	-0.46148	0.018129	0.0375566	1.40803e+06	1.46699e+06	1.09718e+06	2.02765e+06	1.51285e+06	1.40852e+06	1.93569e+06	1.48094e+06	2.19735e+06	1.88608e+06	3.09678e+06	2.34508e+06	1.40965e+06	2.08321e+06	1.65788e+06	2.31264e+06
PC(42:7)	PC	M+H	860.616	15.0319	C50 H87 O8 N1 P1	0.446085	441996	169769	696741	131878	0.63438	-0.65659	0.0100817	0.023429	279711	448826	458892	350789	828493	391449	321111	456698	774178	604005	665137	614870	947755	696156	756403	515424
PC(42:7e)	PC	M+H	846.637	15.547	C50 H89 O7 N1 P1	0.638745	238321	56328.4	615088	102576	0.38746	-1.3679	0.000939106	0.00397777	215740	227047	137798	229261	268852	253920	339303	234647	590592	541404	696335	724292	412213	633923	619903	702045
PC(42:8)	PC	M+H	858.601	12.5222	C50 H85 O8 N1 P1	1.92682	1.10469e+07	1.88376e+06	1.5741e+07	3.38343e+06	0.70179	-0.51088	0.0100817	0.023429	1.09173e+07	1.1752e+07	8.12782e+06	1.25247e+07	1.32688e+07	9.30293e+06	1.29093e+07	9.57234e+06	1.77538e+07	1.11674e+07	1.80198e+07	1.37003e+07	1.63859e+07	1.25122e+07	2.15802e+07	1.48081e+07
PC(42:8e)	PC	M+H	844.621	14.2246	C50 H87 O7 N1 P1	0.459005	16715.1	13942.4	207893	49904.5	0.080402	-3.6366	0.000939106	0.00397777	4.07469e-06	16907.7	4295.8	29718.1	16383.6	43266.4	11398	11751	272257	168436	297356	199651	172501	179606	167848	205491
PC(20:3_22:6)	PC	M+Na	878.567	11.436	C50 H82 O8 N1 P1 Na1	0.287019	145499	96687.9	263845	72706.6	0.55146	-0.85868	0.0405689	0.0719971	267607	67078.2	96295.9	288974	107198	54238.4	65331.9	217271	276901	175464	331962	228094	340914	200916	358220	198288
PC(42:9)	PC	M+H	856.585	17.505	C50 H83 O8 N1 P1	0.0307202	5373.47	4979.4	2896.01	2197.03	1.8555	0.89179	0.372029	0.452003	1656.11	3561.7	6728.65	13830.4	11939.1	1545	2454.03	1272.77	818.66	1028.81	96.1227	3910.12	4900.89	3808.71	6340.84	2263.93
PC(25:0_18:0)	PC	M+H	888.742	19.3754	C51 H103 O8 N1 P1	0.115066	54080.1	56993.6	23631	7903.44	2.2885	1.1944	0.958122	0.972038	22856.8	19900.5	116660	10652.8	12172.8	160558	17252	72588	31649.1	27311.7	26430.4	13215.6	26525	10488.8	22077	31350.3
PC(43:1)	PC	M+H	886.726	18.7685	C51 H101 O8 N1 P1	0.177281	43687.6	27683.8	83724.3	18840.8	0.5218	-0.93842	0.0100817	0.023429	47469.8	28401.8	89424	25539.3	18010.9	65579.7	10321.8	64753.4	96147.2	80178.4	84480.6	48277.6	109596	73027	78543.6	99544.6
PC(43:2)	PC	M+H	884.71	17.462	C51 H99 O8 N1 P1	0.0089168	22559.6	6443.04	23433.6	5508.23	0.9627	-0.054837	1	1	12862.1	22914.8	32803.9	29282	16121.4	23177.4	22846.1	20468.8	28043.6	19086.2	25854.8	28808.5	15798.6	19583.3	30554.7	19738.8
PC(43:2e)	PC	M+H	870.731	19.288	C51 H101 O7 N1 P1	0.449109	997867	1.18139e+06	437466	568848	2.281	1.1897	0.372029	0.452003	275409	499952	3.53551e+06	569564	49204.8	1.80386e+06	100900	1.14853e+06	139803	1.8349e+06	250064	217699	346739	262443	152222	295862
PC(43:3)	PC	M+H	882.695	17.2137	C51 H97 O8 N1 P1	0.190306	11712.4	5034.17	48967.6	18216.9	0.23919	-2.0638	0.000939106	0.00397777	18254.8	11220.4	15484.3	9496.76	5350.47	4278.19	15207.9	14406.5	60824	44120.9	69087.7	48777.1	23532.6	24381.7	49638.9	71377.5
PC(43:4)	PC	M+H	880.679	17.1543	C51 H95 O8 N1 P1	0.273133	74703	15744.4	150378	33090	0.49677	-1.0094	0.000939106	0.00397777	75788.2	64317.7	86231.4	86725.8	93885.3	58054.5	83084.2	49536.7	160001	126358	206939	117453	170434	104778	165505	151560
PC(22:4_21:1)	PC	M+H	878.663	15.9332	C51 H93 O8 N1 P1	0.403992	98457.1	26334.3	257111	59598.5	0.38294	-1.3848	0.000939106	0.00397777	110500	102929	86323.3	102047	124663	53572.2	133565	74057.6	276908	179295	366479	285605	231838	205970	220875	289916
PC(43:5)	PC	M+H	878.663	16.472	C51 H93 O8 N1 P1	0.0892854	27202.7	10826.1	39575.7	9173.37	0.68736	-0.54086	0.0313241	0.0589837	23952.4	24492.8	22923.6	30107.1	33809.4	16544.5	49534.9	16256.9	52362.9	26605.3	41162.4	44622	43810.4	25552.7	43387	39102.7
PC(43:7)	PC	M+H	874.632	14.2709	C51 H89 O8 N1 P1	0.420642	1350.88	3820.85	154624	19176.3	0.0087365	-6.8387	0.000553535	0.00397777	4.07469e-06	4.07469e-06	4.07469e-06	10807	4.07469e-06	4.07469e-06	4.07469e-06	4.07469e-06	154264	148282	145129	125346	177399	137781	175442	173350
PC(22:6_21:1)	PC	M+H	874.632	16.4289	C51 H89 O8 N1 P1	0.349274	29948	5967.46	140774	29749.8	0.21274	-2.2328	0.000939106	0.00397777	40490.9	27105.2	22433.4	35158.8	31553.8	24146.3	31522.4	27173	149561	136549	127366	126492	135339	133547	108696	208640
PC(44:0)	PC	M+H	902.757	19.6385	C52 H105 O8 N1 P1	0.114353	121128	141058	169084	54897.1	0.71637	-0.48121	0.103562	0.156612	65281.5	64107.7	146077	16521.4	34956.5	178016	24562.6	439500	182837	264013	104584	118761	214648	142902	128163	196766
PC(26:0_18:1)	PC	M+H	900.742	19.0155	C52 H103 O8 N1 P1	0.0476067	158145	121073	140077	37468.2	1.129	0.17503	1	1	57570.5	81039.3	26423.7	255474	313384	43404.3	306155	181712	135447	192322	147898	172448	115420	68661.3	133614	154809
PC(22:4_22:6)	PC	M+Na	904.583	11.9366	C52 H84 O8 N1 P1 Na1	0.299378	177168	38820.1	76037.4	53358.1	2.33	1.2203	0.00194753	0.00637467	153544	178354	161925	183934	197072	161744	256446	124326	93851.7	28253	119581	18359.4	130388	46438.6	149310	22118.4
PC(44:10)	PC	M+H	882.601	11.9366	C52 H85 O8 N1 P1	1.05479	6.2698e+06	1.47673e+06	4.48418e+06	1.55872e+06	1.3982	0.48357	0.0520296	0.0879514	5.96135e+06	5.84552e+06	4.78488e+06	6.8146e+06	7.7563e+06	4.85172e+06	8.94024e+06	5.20379e+06	5.03082e+06	3.01153e+06	5.07767e+06	3.41196e+06	5.34534e+06	3.20826e+06	7.51679e+06	3.27109e+06
PC(44:11)	PC	M+H	880.585	10.9772	C52 H83 O8 N1 P1	1.48	2.4958e+06	765868	4.75874e+06	876358	0.52447	-0.93108	0.000939106	0.00397777	2.70745e+06	2.27501e+06	1.97795e+06	3.17158e+06	3.17535e+06	1.5666e+06	3.53547e+06	1.55698e+06	4.82985e+06	3.74492e+06	5.87754e+06	4.44763e+06	4.94339e+06	3.76787e+06	6.10565e+06	4.35309e+06
PC(44:12)	PC	M+H	878.569	10.8937	C52 H81 O8 N1 P1	0.185762	376585	80083.2	456622	130066	0.82472	-0.27803	0.156254	0.220027	438126	389388	267748	406345	475291	302925	446539	286315	538317	371843	546622	252827	480105	322134	642405	498723
PC(44:1e)	PC	M+H	886.762	19.0592	C52 H105 O7 N1 P1	0.106255	45154	19866.5	71675.5	47364.7	0.62998	-0.66663	0.494837	0.568203	54072.6	33851.4	14071.3	64875.2	41319.4	63344	65520.5	24177.5	46768.1	151299	61110.1	142200	44974.4	57012.7	39662.5	30377.2
PC(44:2)	PC	M+H	898.726	18.3384	C52 H101 O8 N1 P1	0.260026	52786.8	11838.7	116405	18798.3	0.45348	-1.1409	0.000939106	0.00397777	42827.4	73398.5	59754.9	57706.3	60178.6	39352.3	47096.6	41980.1	138154	109973	145823	108136	90370.7	107442	127208	104132
PC(26:1_18:1)	PC	M+H	898.726	19.0277	C52 H101 O8 N1 P1	0.0267669	41021.4	19503.4	36598.4	13870	1.1209	0.1646	0.713191	0.769972	25911.4	51615.5	35097.7	29781.4	56159.9	42712.9	74405.1	12487.2	18045.2	20522.1	37742.2	49273.6	36578.9	26481.8	51434.6	52708.4
PC(44:3)	PC	M+H	896.71	17.9974	C52 H99 O8 N1 P1	0.203366	34402.7	5377.7	73016	11704.3	0.47117	-1.0857	0.000939106	0.00397777	31262.9	36956.1	34800.7	40168.1	40211.1	29775	37134.4	24913.5	79696.3	63751.9	92851.9	66795.1	79104	54716.6	70163.9	77048.3
PC(44:3e)	PC	M+H	882.731	18.9508	C52 H101 O7 N1 P1	0.251723	443878	449566	674209	562670	0.65837	-0.60303	0.494837	0.568203	1.49542e+06	248336	61960.5	207474	195131	396517	433028	513150	1.38491e+06	1.51019e+06	483132	1.02709e+06	117830	357485	41582.8	471454
PC(44:4)	PC	M+H	894.695	17.6335	C52 H97 O8 N1 P1	0.137577	358929	112864	414064	75673.9	0.86684	-0.20615	0.563524	0.634285	296654	412712	467165	454550	489353	213880	328377	208743	398400	439144	576317	340496	389617	345013	379382	444141
PC(44:4e)	PC	M+H	880.715	19.4881	C52 H99 O7 N1 P1	2.84722	4.59207e+07	8.69373e+06	5.70916e+07	6.22084e+06	0.80433	-0.31413	0.0135873	0.0294907	5.0524e+07	4.40201e+07	3.25516e+07	5.18479e+07	5.67337e+07	3.62571e+07	5.37839e+07	4.16473e+07	5.80952e+07	4.64259e+07	6.31142e+07	6.42303e+07	5.89723e+07	5.2461e+07	6.13879e+07	5.2046e+07
PC(44:5)	PC	M+H	892.679	16.5104	C52 H95 O8 N1 P1	0.332302	596870	127892	754379	94872.1	0.79121	-0.33787	0.0520296	0.0879514	475866	664169	782601	687167	696019	436207	561746	471183	871158	659502	892976	794295	752907	643307	669432	751454
PC(44:5e)	PC	M+H	878.7	17.1902	C52 H97 O7 N1 P1	0.304353	287948	57928.7	184900	29480.3	1.5573	0.63907	0.00194753	0.00637467	258193	293613	328636	391641	266581	217638	320311	226976	167199	178507	201492	226783	161753	166225	151285	225955
PC(44:6)	PC	M+H	890.663	16.2142	C52 H93 O8 N1 P1	1.02471	321742	108355	1.3059e+06	318097	0.24638	-2.0211	0.000939106	0.00397777	401190	338661	180699	372303	426415	218713	443555	192403	1.44953e+06	846594	1.78887e+06	1.08832e+06	1.24283e+06	995610	1.573e+06	1.46248e+06
PC(44:6e)	PC	M+H	876.684	16.0539	C52 H95 O7 N1 P1	0.152393	155586	33897.6	196571	44593.7	0.7915	-0.33734	0.0520296	0.0879514	112375	133436	186066	191312	184315	144489	180705	111990	199841	185235	271858	225032	126444	186359	156013	221786
PC(44:7)	PC	M+H	888.648	14.9079	C52 H91 O8 N1 P1	1.32712	409619	70127.8	1.97726e+06	340029	0.20717	-2.2711	0.000939106	0.00397777	401621	401129	321771	454053	419400	320448	537786	420743	2.12227e+06	1.52827e+06	2.56391e+06	2.11823e+06	1.80763e+06	1.94507e+06	2.15639e+06	1.57627e+06
PC(44:8)	PC	M+H	886.632	13.4189	C52 H89 O8 N1 P1	0.558836	530462	66258.1	239878	67939	2.2114	1.145	0.000939106	0.00397777	397714	575883	583465	471050	523046	542460	558703	591374	183555	241557	267686	207221	258689	208980	383891	167442
PC(44:9)	PC	M+H	884.616	5.149	C52 H87 O8 N1 P1	0.0803752	47581.3	5592.3	39359.5	3981.78	1.2089	0.27368	0.00538494	0.0143212	44469	49491.2	44208.2	52083.4	51587.4	38878.3	55915	44018.3	41708.3	36031.8	35315.2	42200.3	39285.5	43721.3	33371.2	43242.2
PC(45:2)	PC	M+H	912.742	18.327	C53 H103 O8 N1 P1	0.0164153	31941.1	21595.2	35159.7	26180.4	0.90846	-0.13851	0.713191	0.769972	24542.8	22316.9	84092.4	20181.2	19095.1	29661.7	22581.2	33057.4	24048.2	98177.2	33917.4	22371.5	28759	19097.3	19694.2	35213.1
PC(45:5)	PC	M+H	906.695	17.0781	C53 H97 O8 N1 P1	0.160668	11697.7	5358.85	36345.6	7610.51	0.32185	-1.6356	0.000939106	0.00397777	7311.64	12994.2	6177.12	16303.6	21201.7	5996.49	13465.8	10130.7	42041.2	34057.6	45879.1	27956	37882.7	25940.5	31925.5	45082.2
PC(45:6)	PC	M+H	904.679	16.7977	C53 H95 O8 N1 P1	0.457988	42966.1	18262.5	237834	60307.7	0.18066	-2.4687	0.000939106	0.00397777	56008.8	27572.2	30582.1	57462.2	52324.8	22864	70952.2	25962	256184	165668	341540	173770	259380	180211	264955	260965
PC(45:7)	PC	M+H	902.663	15.5195	C53 H93 O8 N1 P1	0.391333	14328.6	11946.4	148834	21207.6	0.096272	-3.3767	0.000939106	0.00397777	13195.5	7192.45	10736.2	19594.5	32833.5	0.0208757	28870.6	2205.93	137793	144182	191818	123891	144350	132437	164200	151997
PC(46:1)	PC	M+H	928.773	19.5869	C54 H107 O8 N1 P1	0.142933	46130.1	55064.1	87870.4	40846.3	0.52498	-0.92967	0.0520296	0.0879514	26983.5	12502.8	6144.35	8605.08	85820.4	10449.8	54958.7	163576	101938	41526.7	96093.5	171021	66094.1	98934.1	80774.2	46582
PC(28:1_18:1)	PC	M+H	926.757	18.9765	C54 H105 O8 N1 P1	0.0128449	27179.4	21265.9	29255.3	8923.64	0.92904	-0.10619	0.563524	0.634285	10052.5	731.783	15424.6	60959.5	53423.5	15766	35637.3	25440.1	32552.5	33427.3	42417.8	17090.8	18961.6	21741	34891.4	32960.2
PC(46:3)	PC	M+H	924.742	17.3027	C54 H103 O8 N1 P1	0.051221	38145.4	14386.5	45935.1	13316	0.83042	-0.26809	0.227147	0.301073	24988	36564.7	23244.4	33208.9	64619.7	32053.8	54938.5	35545.1	18148.9	42345.8	50311	60588.6	45820.9	41573.6	59907.7	48784.2
PC(46:4)	PC	M+H	922.726	18.4275	C54 H101 O8 N1 P1	0.0257191	37196.7	22398.9	32747.5	13726.1	1.1359	0.18379	0.958122	0.972038	17049.4	65786.4	70280.3	30873.3	52668.1	17551.5	16809.1	26555.5	42378.1	55372.3	41370.7	15874.5	18506.7	27434.7	22964.7	38078.3
PC(46:5)	PC	M+H	920.71	17.2756	C54 H99 O8 N1 P1	0.305192	59842.2	11191.5	154752	45308	0.3867	-1.3707	0.000939106	0.00397777	56648.8	62204	49925.8	67151.3	74857.8	45813.3	72983.2	49153.8	168718	96342.8	229087	125710	160320	112621	203836	141385
PC(46:6)	PC	M+H	918.695	17.3073	C54 H97 O8 N1 P1	0.720984	166474	43918.6	670118	199046	0.24842	-2.0091	0.000939106	0.00397777	177489	167911	137676	180873	233931	117956	209422	106534	754031	404020	986907	494530	721809	469439	825566	704640
PC(46:7)	PC	M+H	916.679	16.1177	C54 H95 O8 N1 P1	1.03992	338015	92970.1	1.29241e+06	162741	0.26154	-1.9349	0.000939106	0.00397777	353902	333001	238630	396587	404242	232087	493016	252654	1.46096e+06	978517	1.485e+06	1.21471e+06	1.23812e+06	1.23927e+06	1.35627e+06	1.36641e+06
PC(47:2)	PC	M+H	940.773	18.314	C55 H107 O8 N1 P1	0.0322305	28942.7	21131.1	22489.9	28072.1	1.2869	0.36392	0.0520296	0.0879514	16485.8	18996.4	74004.2	18958.5	14974.7	26790.2	14300.7	47031.4	12209.3	91327.9	13739.4	10148	20582.5	10677.1	7619.22	13616
PC(47:6)	PC	M+H	932.71	17.7687	C55 H99 O8 N1 P1	0.16082	4327.73	3930.38	32284.5	15912.3	0.13405	-2.8992	0.000906857	0.00397777	7337.85	5156.46	4.07469e-06	4.07469e-06	9907.6	4575.03	7644.92	4.07469e-06	53242.6	20526.9	40348.7	14695.6	30099.1	9953.66	46772.8	42636.5
PC(48:0)	PC	M+H	958.82	20.516	C56 H113 O8 N1 P1	0.111977	127005	49075.5	94083.2	53142.1	1.3499	0.43287	0.156254	0.220027	153942	69818.2	91615.6	167633	171621	57459	182680	121270	117246	52602	90906	66831.7	202017	51786.7	125495	45780.7
PC(48:1)	PC	M+H	956.804	20.1805	C56 H111 O8 N1 P1	0.206561	125691	130697	222951	126528	0.56376	-0.82684	0.156254	0.220027	86101.8	35810.4	330095	47763.3	322052	10168.2	146519	27022.1	235176	83058.9	255460	460226	165560	310183	205175	68774.6
PC(48:6)	PC	M+H	946.726	18.1774	C56 H101 O8 N1 P1	0.126648	6346.05	2662.89	23731.5	9915.23	0.26741	-1.9029	0.0027616	0.00834568	7615.48	6638.92	4814.71	9733.98	7327.58	2717.21	9097.71	2822.81	26354.2	17019.5	37280.2	7338.06	27059.4	14693.1	27683.7	32423.7
PC(48:7)	PC	M+H	944.71	17.1947	C56 H99 O8 N1 P1	0.239734	22068.9	6666.38	75469.4	15943.6	0.29242	-1.7739	0.000939106	0.00397777	22290.4	20003.2	28117.8	28127.7	17317.4	19971.5	30378.1	10345	82191.6	56414.9	100849	57353.1	76263.2	61005.8	87428.8	82248.7
PC(50:0)	PC	M+H	986.851	20.7704	C58 H117 O8 N1 P1	0.158954	87427.4	66958.6	40009.4	20835.1	2.1852	1.1277	0.103562	0.156612	211396	44386.3	4.07469e-06	102023	133000	25298.7	104587	78729	33836.8	8095.95	42405.3	23551	73848.1	36129.4	63335.5	38873.3
PC(32:0_18:1)	PC	M+H	984.835	20.795	C58 H115 O8 N1 P1	0.173956	92445.5	46510	148575	67277.6	0.62221	-0.68452	0.103562	0.156612	145662	120215	17297.6	98942.2	89822.6	43202.9	75902.1	148520	190216	40968.6	102842	83311.9	181387	212807	145968	231103
PC(50:2)	PC	M+H	982.82	20.1	C58 H113 O8 N1 P1	0.168689	39569.4	37607.8	86003.6	43013.8	0.46009	-1.12	0.0405689	0.0719971	51372.2	25814.8	0.0101077	32728.5	100960	16617.5	87042.7	2019.02	95486.1	43984.7	121010	64923.3	63470.2	63203	174340	61611.2
PC(50:3)	PC	M+H	980.804	19.6755	C58 H111 O8 N1 P1	0.160602	18774.9	11714.4	52765	27820.1	0.35582	-1.4908	0.0239487	0.0468347	27681.9	27808.5	5746.72	10721.9	32897	14985.3	27934.3	2423.36	73045.5	12929.6	95768.3	32722.8	49329.5	25243.6	63391	69689.4
PC(50:5)	PC	M+H	976.773	18.998	C58 H107 O8 N1 P1	0.0607117	8230.91	6422.16	15408.2	9071.61	0.53419	-0.90457	0.0520296	0.0879514	16065.4	10509.1	995.764	8539.97	12637.8	2133.81	14965.5	0.0246416	16464.4	3677.89	26719.8	679.661	23239.5	15052.5	16579.7	20851.7
PC(50:7)	PC	M+H	972.742	18.0699	C58 H103 O8 N1 P1	0.113322	4775.25	3935.55	19350.1	8799.53	0.24678	-2.0187	0.00194753	0.00637467	7548.33	4037.22	392.739	7369.06	7556.41	1056.42	10241.8	4.07469e-06	21999.1	8648.76	34581.9	9755.62	21978.9	11573.8	23604.8	22657.8
PC(51:3)	PC	M+H	994.82	17.8514	C59 H113 O8 N1 P1	0.150811	12615.3	11226	45540.3	32152.6	0.27701	-1.852	0.0135873	0.0294907	9178.65	6528.14	2448.7	37458.8	14837.7	2494.51	14884.5	13091.6	56486.9	37771.8	34672.1	114566	52358.3	40173.1	6171.49	22122.2
PC(52:0)	PC	M+H	1014.88	21.2551	C60 H121 O8 N1 P1	0.0949007	78983.8	59537.4	52166.6	32223.9	1.5141	0.59843	0.494837	0.568203	134202	55005.6	13304	114131	183210	19902.7	45220.9	66894.6	123180	21248	62318.5	31813.2	44548.3	45374.6	28170.5	60680
PC(52:1)	PC	M+H	1012.87	20.8896	C60 H119 O8 N1 P1	0.118062	71440.2	66509.7	108297	47314.8	0.65967	-0.60018	0.270149	0.348585	103215	65102.4	4.07469e-06	65518.9	151921	14537.3	171227	0.0321642	121442	54277.3	187102	52835	105018	70255.5	130506	144937
PC(52:5)	PC	M+H	1004.8	19.5713	C60 H111 O8 N1 P1	0.0126903	64108.6	36260.6	60755.2	49975.2	1.0552	0.07751	0.494837	0.568203	113190	40738.6	29049.5	76475.4	96659.4	27546.6	99745.5	29463.7	85212.8	16906.6	164901	15553	65803.4	15888.4	56790.4	64986
PC(52:7)	PC	M+H	1000.77	18.772	C60 H107 O8 N1 P1	0.0881495	7419.76	4567.69	19104.2	11954.4	0.38838	-1.3644	0.0405689	0.0719971	16529.9	8647.01	3787.25	11124.6	4837.19	4930.27	6689.03	2812.83	21655.6	8520.6	35066.6	0.0767837	34177.2	13774.5	21470.1	18169.4
PC(53:5)	PC	M+H	1018.82	19.8137	C61 H113 O8 N1 P1	0.0705456	27560.7	28305.4	14124.8	11232.5	1.9512	0.96438	0.636254	0.703383	66472.4	21208.7	4.07469e-06	19338.1	55079.9	0.0283501	58386.1	4.07469e-06	18161.8	0.00823968	32090.9	1720.93	24188.7	5062.93	16636.2	15137
PC(54:0)	PC	M+H	1042.91	21.5444	C62 H125 O8 N1 P1	0.176982	78540.7	41128.8	33087.3	23134.7	2.3737	1.2472	0.0313241	0.0589837	81498.8	59537.9	42740.1	117504	93550.3	20073.8	148187	65233.1	40421.9	14236.4	66249.6	5979.44	29648.7	15628.8	25787.7	66745.6
PC(31:1_23:0)	PC	M+Na	1062.88	21.233	C62 H122 O8 N1 P1 Na1	0.184	56147	31400.5	101392	26600.4	0.55376	-0.85266	0.0135873	0.0294907	73483.3	57953	4.07469e-06	55605.5	102866	25467.3	73614.1	60186.8	61726.4	68095.6	95233.4	122761	104731	138908	99466.1	120212
PC(54:2)	PC	M+H	1038.88	20.8934	C62 H121 O8 N1 P1	0.0913622	44101.3	41068.9	67053	33640.7	0.65771	-0.60448	0.226805	0.301073	63970.6	27119	4.07469e-06	62812.5	75809.1	4.07469e-06	112878	10221.4	89059.7	14413.1	110826	31421.3	65261	50123.9	74584.7	100734
PC(54:3)	PC	M+H	1036.87	20.571	C62 H119 O8 N1 P1	0.225997	15955.1	21507.9	79771.6	46796	0.20001	-2.3219	0.0100267	0.023429	20250.9	0.0912718	4.07469e-06	14744.6	32988.9	4.07469e-06	59656.2	0.0242896	140024	12244.6	129261	52040.3	55197.2	36479.6	109433	103493
PC(54:5)	PC	M+H	1032.84	20.0453	C62 H115 O8 N1 P1	0.121481	355761	189193	291173	156219	1.2218	0.28903	0.494837	0.568203	532875	344168	187516	438264	585829	160630	506190	90612.5	370822	126038	562728	117098	362685	137226	357050	295735
PC(54:6)	PC	M+Na	1052.8	17.627	C62 H112 O8 N1 P1 Na1	0.134958	50325.5	16047.6	76165.9	20336.1	0.66074	-0.59786	0.0313241	0.0589837	67277.9	72847.7	38737.5	53333.2	46644.7	41399.5	58563.8	23799.6	60929.5	67001.1	74172.8	100460	99748.6	57629.2	51449.6	97935.5
PC(54:7)	PC	M+H	1028.8	19.3679	C62 H111 O8 N1 P1	0.327022	119932	70618.4	278699	155308	0.43033	-1.2165	0.0520296	0.0879514	211050	122499	38318.9	115070	151535	57917.5	217561	45505.8	377491	96206	530661	105874	327601	123972	332659	335127
PC(55:2)	PC	M+H	1052.9	21.2992	C63 H123 O8 N1 P1	0.0746883	12422.4	15086.4	23544.6	9319.62	0.52761	-0.92245	0.0652856	0.107911	9348.03	7700.14	4.07469e-06	10751.8	34439.6	4.07469e-06	37139.7	4.07469e-06	22026.4	13776.6	42371.6	26346.8	19344.5	17256.8	30353.8	16880
PC(55:7)	PC	M+H	1042.82	19.6309	C63 H113 O8 N1 P1	0.188707	110240	77968.8	182546	88406.1	0.6039	-0.72762	0.0660819	0.107911	180962	79882	30176.6	126092	180575	57758.1	218710	7760.15	220914	66295.2	316579	84003.2	227942	100102	218121	226413
PC(56:0)	PC	M+H	1070.95	21.7566	C64 H129 O8 N1 P1	0.0859561	20908.1	21444.7	6613.02	4740.96	3.1617	1.6607	0.189263	0.257782	19801.2	6211.18	2772.13	18758.5	46781	4.07469e-06	59680.6	13260.1	12374.5	2811.32	12330.2	0.0453227	3996.86	7463.88	3395.94	10531.4
PC(56:1)	PC	M+H	1068.93	21.5442	C64 H127 O8 N1 P1	0.00294933	18711.3	16192.4	19165	13284.4	0.97632	-0.034568	0.874735	0.905144	25280.3	7321.15	4.07469e-06	33990.1	44727.9	4.07469e-06	24259	14111.9	41661.9	2823.88	30462.9	4273.8	19030.6	10924.2	18332	25811.1
PC(56:4)	PC	M+H	1062.88	21.2539	C64 H121 O8 N1 P1	0.181928	58228.1	32351.2	103497	28013.6	0.56261	-0.8298	0.0135873	0.0294907	77629.1	60996.1	4.07469e-06	55809.1	101193	25457.1	82996.7	61743.9	62097.8	70179.5	95003.7	127807	98029.2	140104	106173	128580
PC(56:5)	PC	M+H	1060.87	20.4759	C64 H119 O8 N1 P1	0.0680633	82598.4	61716.6	102551	41806.2	0.80544	-0.31216	0.636502	0.703383	104579	60165.1	32484.7	111420	147148	29855.2	175136	4.07469e-06	131055	55788.8	170966	54376.9	102125	67705.5	103945	134448
PC(56:7)	PC	M+H	1056.84	19.8802	C64 H115 O8 N1 P1	0.634782	970280	605457	1.71929e+06	911614	0.56435	-0.82534	0.0831229	0.13017	1.5002e+06	746716	339033	1.15877e+06	1.43113e+06	412974	1.87765e+06	295773	2.20394e+06	736639	3.35009e+06	648145	1.54533e+06	1.04845e+06	2.2181e+06	2.00363e+06
PC(57:2)	PC	M+H	1080.93	21.3	C65 H127 O8 N1 P1	0.105762	6026.94	7511.98	20583.8	10176.5	0.2928	-1.772	0.0129063	0.0294907	4.07469e-06	8816.71	4.07469e-06	5924.48	14236.9	4.07469e-06	19237.4	4.07469e-06	36329.7	13088.8	30787.9	26999	6441.54	21691.7	16126.7	13204.9
PC(57:3)	PC	M+H	1078.91	21.2697	C65 H125 O8 N1 P1	0.137408	28739.3	20021.5	55243.1	16787.6	0.52023	-0.94277	0.0239487	0.0468347	29703.3	19948.3	4.07469e-06	37012.3	58426.4	10956.7	52770.1	21097.4	51946.3	38040.3	77527.7	60170.8	45372.8	37896.5	81874.1	49116.4
PC(57:4)	PC	M+H	1076.9	21.468	C65 H123 O8 N1 P1	0.0419355	23884.9	29034.2	32609.3	24097.3	0.73246	-0.44918	0.340987	0.427186	36840.6	12031.1	4.07469e-06	17788.3	83497	4.07469e-06	40922.5	4.07469e-06	63291.3	4.07469e-06	42176.3	8617.42	15007.8	25153.5	62536.3	44091.5
PC(57:7)	PC	M+H	1070.85	20.1007	C65 H117 O8 N1 P1	0.191302	87615.3	66502.9	154259	67638.8	0.56798	-0.8161	0.0660819	0.107911	130569	53049.3	35872.3	94915.8	159158	26390.3	189899	11069.3	196397	79971.3	247234	67928.4	178189	84072.2	206868	173412
PC(58:4)	PC	M+H	1090.91	21.576	C66 H125 O8 N1 P1	0.166326	75777.2	33419.6	116428	27082	0.65085	-0.6196	0.0405689	0.0719971	92632.3	113071	25190.9	65587.4	119208	45869.2	90711.9	53946.3	108720	72436.8	112509	130146	88406	158353	131113	129741
PC(58:5)	PC	M+H	1088.9	21.2501	C66 H123 O8 N1 P1	0.1818	26294.3	18375.7	65442.7	21693.6	0.40179	-1.3155	0.00193259	0.00637467	52706	33612.1	4.07469e-06	22868.4	37743.9	4.07469e-06	35469.2	27955	40179.7	45124.5	57739.6	57131.4	75567.6	108348	61517.5	77933.1
PC(58:7)	PC	M+H	1084.87	20.327	C66 H119 O8 N1 P1	0.528972	220008	184145	604488	316567	0.36396	-1.4582	0.0239487	0.0468347	325720	150351	25194.8	221777	421555	65930.2	512492	37048.4	855345	216108	1.00821e+06	226620	611038	296403	782530	839654
PC(59:5)	PC	M+H	1102.91	21.443	C67 H125 O8 N1 P1	0.0541403	42771.4	29113.6	31979.8	17950.3	1.3375	0.41949	0.528309	0.606261	73682.8	20101.7	16610	47014.4	76395.7	4.07469e-06	70629	37737.7	38333.3	4.07469e-06	33945	19465.2	46292.1	50489.1	49130.4	18182.9
PC(59:6)	PC	M+H	1100.9	21.1535	C67 H123 O8 N1 P1	0.120087	4591.1	7050.14	22144.7	11480.1	0.20732	-2.2701	0.016462	0.0357015	6531.53	4.07469e-06	1880.33	4.07469e-06	20050.7	4.07469e-06	8266.23	4.07469e-06	13919.8	4.07469e-06	19458.3	30749.4	31396.5	31450.4	31936.5	18247.1
PE(16:0e)	PE	M+H	454.293	3.948	C21 H45 O7 N1 P1	0.124702	70805.4	57803.7	34897.1	36149	2.029	1.0208	0.0520296	0.0879514	27518.5	16211.5	63035.9	101617	186879	46593.8	103042	21546	83407.3	8098.2	23983.8	101450	12745.7	13501.3	16040.7	19949.6
PE(17:0e)	PE	M+H	468.308	4.288	C22 H47 O7 N1 P1	0.505244	224594	85809	478201	74854.6	0.46966	-1.0903	0.000939106	0.00397777	322872	177039	167172	277776	298509	159013	302612	91757.2	462019	462554	482531	555939	396316	461977	391369	612907
PE(18:0e)	PE	M+Na	504.306	4.868	C23 H48 O7 N1 P1 Na1	0.0439192	54066.6	22714.3	46842.6	5245.27	1.1542	0.20692	0.636502	0.703383	76543	46586.8	35610.7	70041.8	75826.8	39111.2	72431	16381.3	46063.5	36815	47195.2	44876.8	53795.5	45226	52771.4	47997.6
PE(18:1e)	PE	M+Na	502.29	3.9338	C23 H46 O7 N1 P1 Na1	0.0684904	42564.6	13262.5	33573.9	3235.68	1.2678	0.34231	0.227147	0.301073	53002.5	33490.8	32434.3	54137.5	53107.3	33251.8	57828.9	23263.4	32060.9	36700.8	28378.3	31368.3	35145.8	35183.9	31643.8	38109.7
PE(18:2e)	PE	M+Na	500.275	2.57887	C23 H44 O7 N1 P1 Na1	0.0531635	18204.3	10331.8	24885	7940.69	0.73154	-0.451	0.0405689	0.0719971	20223.2	7269.45	16179.3	17686	14405.9	14948	12921.7	42000.9	20813.1	16548.6	22722.1	37958.5	18276.6	34466.8	19502.9	28791.6
PE(19:0e)	PE	M+Na	518.322	6.376	C24 H50 O7 N1 P1 Na1	0.316087	21788.2	7893.26	109760	14651.4	0.19851	-2.3327	0.000939106	0.00397777	27016.5	16441.9	16677.9	27676.1	29770.3	16617.3	30610.7	9494.54	110595	102209	111235	118426	92596.5	104927	98105.6	139990
PE(19:2)	PE	M+H	506.288	2.74137	C24 H45 O8 N1 P1	0.14771	10816.8	4778.44	32682.8	8948.12	0.33096	-1.5953	0.000939106	0.00397777	3304.2	3975.61	10624.4	13662.2	14917.9	11058.3	15998.1	12993.4	40562.7	32042	25121.1	41288	18513.2	41537.2	24750.5	37647.8
PE(20:0e)	PE	M+H	510.355	7.18018	C25 H53 O7 N1 P1	0.322459	26691.8	19559.7	121447	18069.3	0.21978	-2.1859	0.000939106	0.00397777	63405	14712.3	15494.7	31822	28240.8	12132.2	43921.4	3805.64	113169	103893	109654	109371	135764	116009	125180	158534
PE(20:3e)	PE	M+Na	526.29	2.671	C25 H46 O7 N1 P1 Na1	0.0562679	88547.4	59289.6	104320	34325.5	0.8488	-0.23649	0.189263	0.257782	34245.9	67883.7	60545.3	82315.3	179610	65070.2	182493	36215.1	68218.1	80377.2	72660.9	90843.9	171954	114259	109970	126278
PE(10:1e_10:3)	PE	M+H	502.293	2.409	C25 H45 O7 N1 P1	1.23197	6.39014e+06	1.86463e+06	4.2978e+06	733400	1.4868	0.57225	0.018129	0.0375566	6.54037e+06	4.98509e+06	5.96233e+06	8.94685e+06	8.48833e+06	4.8813e+06	7.64229e+06	3.67453e+06	3.57492e+06	4.53062e+06	3.66074e+06	4.45789e+06	3.89538e+06	4.99733e+06	3.66293e+06	5.60262e+06
PE(20:5e)	PE	M+H	500.277	1.90911	C25 H43 O7 N1 P1	0.176257	13764.2	3775.87	42658.7	8621.05	0.32266	-1.6319	0.000939106	0.00397777	16691	10812.4	15266.6	18016.3	15810.1	10918.1	15644.1	6955.13	44789	40137.2	38250.6	54764.9	32066.7	44299.9	32824	54137.5
PE(21:2)	PE	M+Na	556.301	2.75557	C26 H48 O8 N1 P1 Na1	0.0133329	63678.8	11509.4	65500.4	11769.8	0.97219	-0.04069	0.874826	0.905144	77329.1	61352.9	67251.1	70866.5	65425.7	51563.1	72865	42777.2	86003.8	63161.7	57775	61922.5	56531.4	82279.7	57229.1	59100.5
PE(21:3)	PE	M+Na	554.285	2.42524	C26 H46 O8 N1 P1 Na1	0.537083	728968	128096	1.05477e+06	170264	0.69112	-0.533	0.00538494	0.0143212	741445	733373	559398	789217	767951	625966	977393	637002	1.17029e+06	1.00595e+06	1.02411e+06	1.26424e+06	701003	1.17933e+06	1.07477e+06	1.01847e+06
PE(22:1e)	PE	M+H	536.371	7.544	C27 H55 O7 N1 P1	0.109685	12917.6	4653.21	24966	3069.87	0.51741	-0.95063	0.000939106	0.00397777	16514.1	14181.3	10052.6	15485.1	14731.9	9975	18424.9	3975.9	26617.3	20487.3	27332.8	27735.5	20866.5	25436.2	23175.5	28077
PE(23:4)	PE	M+H	558.319	3.59265	C28 H49 O8 N1 P1	0.193595	52120.3	9257.67	17616.5	4924.3	2.9586	1.5649	0.000939106	0.00397777	58197.1	65539.2	43734	59206.5	52747.5	40357.5	55615.9	41564.8	22483.2	13769.3	8944.85	22449.2	16182.6	18744.6	22678.5	15679.8
PE(34:0)	PE	M+Na	742.536	15.7225	C39 H78 O8 N1 P1 Na1	0.0507395	43518.3	5265.11	49945.7	12260.9	0.87131	-0.19874	0.189263	0.257782	39715.8	44609.1	35265.9	44831.3	51907.8	38928.4	46480	46408.1	69235.8	46938	51083.6	38446.3	63969.8	47636.1	50617.5	31638.1
PE(16:0p_18:0)	PE	M+H	704.559	15.289	C39 H79 O7 N1 P1	0.549349	533917	56534.6	834001	122809	0.64019	-0.64343	0.00135938	0.00497765	538994	566681	510093	502033	462795	652896	515343	522499	733492	809052	901507	912270	738241	967717	638404	971324
PE(18:0p_16:0)	PE	M+H	704.559	16.397	C39 H79 O7 N1 P1	0.281014	1.07548e+06	204727	1.25377e+06	258473	0.8578	-0.22128	0.156254	0.220027	1.46044e+06	1.21062e+06	858673	1.1658e+06	1.02057e+06	828187	1.07121e+06	988371	1.46596e+06	892940	1.27518e+06	1.33634e+06	1.13699e+06	1.28647e+06	956075	1.68019e+06
PE(34:1)	PE	M+Na	740.52	12.226	C39 H76 O8 N1 P1 Na1	0.578602	144395	68517.2	589595	395687	0.24491	-2.0297	0.00538494	0.0143212	174898	163184	245633	114039	193634	60854.1	40970.9	161950	395192	616544	269289	1.19472e+06	130074	1.10315e+06	281303	726480
PE(16:0p_18:1)	PE	M+H	702.543	15.1568	C39 H77 O7 N1 P1	0.825881	3.09375e+06	253064	3.87031e+06	451179	0.79936	-0.32309	0.00387604	0.0109285	2.79368e+06	3.18005e+06	3.39719e+06	2.8867e+06	2.86517e+06	3.49625e+06	3.06458e+06	3.06642e+06	3.91748e+06	3.90452e+06	3.40344e+06	4.3022e+06	3.35029e+06	4.09651e+06	3.41745e+06	4.57057e+06
PE(16:0_18:2)	PE	M+Na	738.504	12.0543	C39 H74 O8 N1 P1 Na1	0.338548	445626	84176.7	597275	106324	0.7461	-0.42256	0.0135873	0.0294907	490023	477853	546028	421744	531856	419572	389328	288605	586672	597098	507143	806203	513847	635864	474032	657340
PE(34:2e)	PE	M+Na	724.525	13.775	C39 H76 O7 N1 P1 Na1	2.07921	1.19216e+07	1.28963e+06	7.83569e+06	690690	1.5215	0.60545	0.000939106	0.00397777	1.13031e+07	1.05481e+07	1.39748e+07	1.29353e+07	1.2924e+07	1.22878e+07	1.06445e+07	1.07556e+07	7.82535e+06	9.21831e+06	7.33381e+06	8.2933e+06	7.09026e+06	7.82831e+06	7.19796e+06	7.89823e+06
PE(16:0p_18:2)	PE	M+H	700.528	13.9955	C39 H75 O7 N1 P1	0.914793	485892	41887.7	1.29124e+06	313175	0.3763	-1.41	0.000939106	0.00397777	472904	428304	547017	492467	479148	456943	546347	464002	1.02806e+06	984015	1.34103e+06	1.75121e+06	981732	1.47825e+06	1.0988e+06	1.66681e+06
PE(14:0_20:3)	PE	M+Na	736.489	11.1675	C39 H72 O8 N1 P1 Na1	0.0563478	206489	36649.5	192890	34758.7	1.0705	0.098287	0.494837	0.568203	225619	226958	132074	218589	255350	191870	189196	212257	204196	139070	185376	148038	226540	188180	230097	221625
PE(16:1_18:2)	PE	M+H	714.507	11.9931	C39 H73 O8 N1 P1	0.111978	551648	183168	612250	177594	0.90102	-0.15037	0.372029	0.452003	467925	487910	934891	416916	476414	662211	357821	609097	455659	867554	522732	908037	498749	532471	485384	627414
PE(14:0p_20:4)	PE	M+H	696.496	12.219	C39 H71 O7 N1 P1	0.0472352	5779.09	9349.49	684.429	1935.86	8.4437	3.0779	0.0535025	0.0903586	4.07469e-06	5924.14	3107.84	2368.61	6878.69	27953.4	4.07469e-06	4.07469e-06	4.07469e-06	4.07469e-06	4.07469e-06	4.07469e-06	4.07469e-06	4.07469e-06	5475.43	4.07469e-06
PE(12:0p_22:6)	PE	M+H	692.465	10.326	C39 H67 O7 N1 P1	0.0687221	937.384	287.238	6182.61	3282.64	0.15162	-2.7215	0.000939106	0.00397777	983.339	1283.82	926.63	1248.88	604.971	467.036	890.876	1093.52	11542.5	3983.03	10080.4	6373.54	2147.89	3557.17	4605.83	7170.52
PE(17:1_18:1)	PE	M+Na	752.52	12.442	C40 H76 O8 N1 P1 Na1	0.136706	141771	21396.8	109981	35426.6	1.2891	0.36631	0.0660819	0.107911	154228	143073	160661	113959	136272	138874	112953	174151	99971.7	110225	71576.3	131280	102335	145140	57403.2	161918
PE(15:0_20:3)	PE	M+Na	750.504	11.9299	C40 H74 O8 N1 P1 Na1	0.701252	629594	90950.1	1.13308e+06	234519	0.55565	-0.84776	0.000939106	0.00397777	632900	670726	501730	613170	742664	506452	737432	631676	1.20962e+06	859319	1.29841e+06	813293	1.34692e+06	947476	1.4399e+06	1.1497e+06
PE(18:0p_18:0)	PE	M+H	732.59	17.501	C41 H83 O7 N1 P1	0.0332101	388445	110732	375756	65861.9	1.0338	0.047914	0.958122	0.972038	601359	366554	266610	427875	397161	264846	455795	327360	390672	306549	405682	388162	289205	423971	319595	482213
PE(18:0_18:1)	PE	M+Na	768.551	14.476	C41 H80 O8 N1 P1 Na1	5.84248	1.42268e+08	1.35842e+07	1.07877e+08	8.94298e+06	1.3188	0.39923	0.000939106	0.00397777	1.51855e+08	1.48763e+08	1.22708e+08	1.50092e+08	1.59808e+08	1.22475e+08	1.43694e+08	1.38751e+08	1.07214e+08	1.00934e+08	9.60925e+07	1.19315e+08	1.0318e+08	1.19417e+08	1.01887e+08	1.14974e+08
PE(14:0_22:1)	PE	M+Na	768.551	17.662	C41 H80 O8 N1 P1 Na1	0.0485003	24149.9	13342.3	32712.2	23256.9	0.73825	-0.43781	0.563524	0.634285	28594.7	12811.6	14584.9	35093.9	18524.1	29826.8	46978.1	6784.79	22244.9	34776.3	7667.38	36628.5	26396.1	85925.5	25957	22101.7
PE(16:0p_20:1)	PE	M+H	730.575	16.4195	C41 H81 O7 N1 P1	0.742688	3.73561e+06	338200	3.02443e+06	505099	1.2351	0.30468	0.00740553	0.0183503	4.31266e+06	3.81373e+06	3.5411e+06	4.04635e+06	3.51895e+06	3.35259e+06	3.40606e+06	3.89345e+06	3.20507e+06	2.52976e+06	2.94713e+06	3.15679e+06	2.90852e+06	3.31968e+06	2.23321e+06	3.8953e+06
PE(18:0_18:2)	PE	M+Na	766.536	10.801	C41 H78 O8 N1 P1 Na1	0.0692219	30144.7	8848.27	48403.8	59352.9	0.62278	-0.68322	0.874826	0.905144	23936	36000.2	39421.9	12791.9	38411	28429.8	28346.2	33820.9	30101.5	5035.69	28436.7	193021	22533.2	34791.3	36344.2	36967.2
PE(18:1_18:1)	PE	M+Na	766.536	13.1485	C41 H78 O8 N1 P1 Na1	3.94614	3.71996e+07	3.33344e+06	2.29805e+07	2.32064e+06	1.6187	0.69488	0.000939106	0.00397777	3.61943e+07	3.74507e+07	4.34643e+07	3.73845e+07	3.91615e+07	3.16176e+07	3.65269e+07	3.57966e+07	2.09328e+07	2.47116e+07	2.06078e+07	2.65315e+07	2.06469e+07	2.54222e+07	2.20535e+07	2.29377e+07
PE(16:0_20:2)	PE	M+Na	766.536	13.5793	C41 H78 O8 N1 P1 Na1	3.43762	1.77417e+07	2.81741e+06	6.9839e+06	1.02345e+06	2.5404	1.345	0.000939106	0.00397777	1.89648e+07	1.85439e+07	1.28383e+07	1.84935e+07	1.9933e+07	1.48453e+07	2.15674e+07	1.6747e+07	7.80864e+06	5.3729e+06	5.60474e+06	7.49643e+06	7.90785e+06	7.75447e+06	7.43402e+06	6.49215e+06
PE(36:2e)	PE	M+Na	752.556	15.5811	C41 H80 O7 N1 P1 Na1	0.277199	288440	409064	92269.4	84401.1	3.1261	1.6443	0.156254	0.220027	299419	35793.3	1.27997e+06	95957.2	195476	75006.3	135400	190500	42200.3	58889.1	37945.1	42907.3	252662	53535.6	200791	49224.5
PE(18:1p_18:1)	PE	M+H	728.559	15.3666	C41 H79 O7 N1 P1	1.80927	4.31853e+06	1.34256e+06	8.25883e+06	2.63521e+06	0.5229	-0.9354	0.00538494	0.0143212	5.44928e+06	3.91404e+06	3.08207e+06	4.58623e+06	5.38539e+06	2.49665e+06	6.33708e+06	3.29745e+06	5.89183e+06	6.57639e+06	8.04655e+06	1.12002e+07	4.51897e+06	1.02096e+07	7.70949e+06	1.19176e+07
PE(18:1p_18:2)	PE	M+H	726.543	13.9396	C41 H77 O7 N1 P1	0.0756141	366847	59813.1	342161	70501.9	1.0721	0.1005	0.563524	0.634285	341719	396844	482004	394610	361084	346424	277445	334643	320279	342857	266533	431300	263134	397939	284091	431157
PE(16:0p_20:3)	PE	M+H	726.543	14.792	C41 H77 O7 N1 P1	0.215452	92026.3	12028.5	47120.4	13455.6	1.953	0.9657	0.000939106	0.00397777	77105.8	91800.3	115187	87509.7	88830	79999	95689.8	100089	56998.4	63864.5	52042.9	45571	39618	58063.1	22408.7	38396.3
PE(16:1_20:3)	PE	M+Na	762.504	11.3103	C41 H74 O8 N1 P1 Na1	1.19689	2.01472e+06	277629	3.42813e+06	551809	0.5877	-0.76684	0.000939106	0.00397777	1.58074e+06	2.2163e+06	2.23063e+06	1.81618e+06	2.17757e+06	1.69285e+06	2.09114e+06	2.31233e+06	4.23463e+06	3.05015e+06	2.67623e+06	4.11408e+06	3.21337e+06	3.11589e+06	3.24099e+06	3.77974e+06
PE(36:4)	PE	M+Na	762.504	11.7602	C41 H74 O8 N1 P1 Na1	1.10828	2.08976e+06	467937	898305	126444	2.3263	1.2181	0.000939106	0.00397777	2.27989e+06	2.2174e+06	1.16188e+06	2.48312e+06	1.89625e+06	1.77974e+06	2.6392e+06	2.26058e+06	773907	773668	789672	953763	1.12001e+06	932114	836084	1.00722e+06
PE(36:4e)	PE	M+Na	748.525	13.2624	C41 H76 O7 N1 P1 Na1	4.6884	8.24453e+07	5.99075e+06	1.04714e+08	8.90879e+06	0.78734	-0.34495	0.000939106	0.00397777	8.96153e+07	8.0845e+07	8.24665e+07	7.87857e+07	8.38614e+07	7.32155e+07	9.16858e+07	7.9087e+07	1.10342e+08	9.97023e+07	9.68634e+07	1.00537e+08	9.22697e+07	1.06402e+08	1.12945e+08	1.18651e+08
PE(18:2p_18:2)	PE	M+H	724.528	12.9423	C41 H75 O7 N1 P1	0.38525	18477.7	7856.98	159801	52042.4	0.11563	-3.1124	0.000939106	0.00397777	12723.3	14686	15755.8	13661.5	29890.8	21619.1	9478.6	30006.8	140970	89462	164094	162585	178569	203129	94965.2	244638
PE(16:0p_20:4)	PE	M+H	724.528	13.7698	C41 H75 O7 N1 P1	2.05038	1.19766e+07	1.33515e+06	7.96477e+06	706569	1.5037	0.58851	0.000939106	0.00397777	1.14032e+07	1.03929e+07	1.40532e+07	1.30141e+07	1.30526e+07	1.2366e+07	1.06986e+07	1.08318e+07	7.98329e+06	9.35661e+06	7.51727e+06	8.45772e+06	7.21845e+06	7.93746e+06	7.22154e+06	8.02584e+06
PE(16:0_20:5)	PE	M+H	738.507	12.0345	C41 H73 O8 N1 P1	0.338548	445626	84176.7	597275	106324	0.7461	-0.42256	0.0135873	0.0294907	490023	477853	546028	421744	531856	419572	389328	288605	586672	597098	507143	806203	513847	635864	474032	657340
PE(36:5e)	PE	M+H	724.528	12.9975	C41 H75 O7 N1 P1	0.369836	18657.2	7439.37	152451	55949.8	0.12238	-3.0305	0.000939106	0.00397777	12621.6	14370.8	15671.1	15065.6	29392.2	20922.8	11045.8	30167.4	139520	70228.4	162514	160370	143764	203645	93876	245690
PE(16:1p_20:4)	PE	M+H	722.512	12.4339	C41 H73 O7 N1 P1	0.101085	43079.7	24818	23495.5	16381.4	1.8335	0.87462	0.127808	0.186204	35961.5	46853.5	90960.6	62964.6	22336.4	26290	14063.8	45207.5	22351	41945.1	46578.5	7588.33	30927.2	26642.6	4.07469e-06	11931.6
PE(16:0p_20:5)	PE	M+H	722.512	12.7616	C41 H73 O7 N1 P1	0.367302	17386.3	20465.1	142532	34447.2	0.12198	-3.0353	0.000939106	0.00397777	0.038476	11604.3	41151.9	54615.3	0.0329958	20102.7	11616.4	0.0555738	169908	160276	136179	128261	108289	141622	94161.3	201564
PE(14:0p_22:6)	PE	M+H	720.496	11.8109	C41 H71 O7 N1 P1	0.459168	281266	35900.4	488811	82392.2	0.57541	-0.79734	0.000939106	0.00397777	244420	318805	318955	295996	223284	309180	280020	259472	609504	473597	534071	514462	353694	405438	465586	554138
PE(17:0_20:2)	PE	M+Na	780.551	14.297	C42 H80 O8 N1 P1 Na1	0.022261	644581	147540	634809	85214.4	1.0154	0.022039	0.874826	0.905144	674301	657148	402709	660101	789301	536121	874946	562021	645080	574439	601392	545201	790251	617015	732628	572465
PE(17:0_20:3)	PE	M+Na	778.536	13.0802	C42 H78 O8 N1 P1 Na1	0.976821	341363	58047.4	1.19113e+06	180431	0.28659	-1.803	0.000939106	0.00397777	386519	390811	247132	321047	367635	307393	416761	293603	1.20516e+06	865829	1.19854e+06	1.13922e+06	1.11549e+06	1.15771e+06	1.46963e+06	1.37745e+06
PE(17:1_20:3)	PE	M+Na	776.52	12.0076	C42 H76 O8 N1 P1 Na1	1.05931	3.25718e+06	292521	4.44627e+06	591588	0.73256	-0.44897	0.000939106	0.00397777	3.3064e+06	3.38519e+06	2.85968e+06	3.04736e+06	3.40072e+06	2.88358e+06	3.58118e+06	3.59332e+06	4.78587e+06	3.70537e+06	4.67461e+06	3.87379e+06	5.13883e+06	3.70898e+06	5.02882e+06	4.65388e+06
PE(15:0_22:6)	PE	M+H	750.507	11.9479	C42 H73 O8 N1 P1	0.697744	633183	89226.2	1.13303e+06	235659	0.55884	-0.83949	0.000939106	0.00397777	633880	672851	512059	618572	744394	508905	740214	634588	1.21052e+06	860569	1.29988e+06	808157	1.34524e+06	947703	1.44198e+06	1.15015e+06
PE(20:0_18:1)	PE	M+Na	796.583	15.7351	C43 H84 O8 N1 P1 Na1	0.90894	1.03971e+06	203655	1.85555e+06	294172	0.56032	-0.83567	0.000939106	0.00397777	1.07029e+06	1.06021e+06	954447	1.34189e+06	1.20626e+06	683031	1.12803e+06	873493	1.71776e+06	1.44214e+06	1.94067e+06	1.79984e+06	1.78322e+06	2.0239e+06	1.69343e+06	2.44348e+06
PE(18:0p_20:1)	PE	M+H	758.606	17.452	C43 H85 O7 N1 P1	0.086952	746330	126084	705176	149794	1.0584	0.081831	0.874826	0.905144	976727	697203	595565	794186	735805	586883	814856	769417	679898	642187	824906	771229	531198	825914	473351	892725
PE(18:0_20:2)	PE	M+Na	794.567	14.9573	C43 H82 O8 N1 P1 Na1	6.07561	9.62579e+07	2.09084e+07	5.69897e+07	6.95903e+06	1.689	0.7562	0.0027616	0.00834568	1.08245e+08	1.04424e+08	5.96191e+07	9.2696e+07	1.21872e+08	7.46211e+07	1.15277e+08	9.33085e+07	6.32615e+07	4.09164e+07	5.81321e+07	5.96166e+07	5.70876e+07	6.00297e+07	6.15724e+07	5.53008e+07
PE(20:1_18:1)	PE	M+H	772.585	15.7585	C43 H83 O8 N1 P1	0.595308	1.36112e+06	691645	1.96925e+06	404003	0.69119	-0.53286	0.103562	0.156612	1.03596e+06	1.05476e+06	1.7023e+06	2.38724e+06	843077	666974	2.34632e+06	852324	2.14481e+06	1.92976e+06	2.07284e+06	2.31956e+06	1.93694e+06	1.51757e+06	1.29739e+06	2.53516e+06
PE(38:2)	PE	M+Na	794.567	15.7585	C43 H82 O8 N1 P1 Na1	0.466954	886328	1.04423e+06	359105	153412	2.4682	1.3034	0.0135873	0.0294907	3.46013e+06	411350	412472	585740	544690	485775	698419	492049	326410	270900	405326	216501	419454	281481	695759	257013
PE(20:0p_18:2)	PE	M+H	756.59	16.6121	C43 H83 O7 N1 P1	0.542402	1.09703e+06	285684	1.57976e+06	525942	0.69442	-0.52611	0.0520296	0.0879514	1.4596e+06	970473	819219	1.10114e+06	1.2315e+06	686636	1.48937e+06	1.01827e+06	1.37895e+06	1.28305e+06	1.48504e+06	2.60532e+06	997779	1.70832e+06	1.14723e+06	2.03239e+06
PE(18:0_20:3)	PE	M+Na	792.551	14.0216	C43 H80 O8 N1 P1 Na1	7.44871	1.19561e+08	1.64894e+07	1.73327e+08	1.42263e+07	0.6898	-0.53576	0.000939106	0.00397777	1.2465e+08	1.20013e+08	9.05375e+07	1.20532e+08	1.41124e+08	1.12702e+08	1.39139e+08	1.07788e+08	1.74677e+08	1.46322e+08	1.78278e+08	1.83605e+08	1.57072e+08	1.84714e+08	1.76254e+08	1.85697e+08
PE(38:3)	PE	M+Na	792.551	26.598	C43 H80 O8 N1 P1 Na1	0.10118	8764.74	6491.27	33510	49090.9	0.26156	-1.9348	0.792896	0.837939	2244.32	3963.23	12142.1	3390.82	17039.9	9871.31	18204.7	3261.56	71630.7	41116.8	137544	47.5903	23.0987	6943.83	3584.7	7188.67
PE(38:3e)	PE	M+Na	778.572	16.4699	C43 H82 O7 N1 P1 Na1	0.203683	259104	163426	166505	43004.3	1.5561	0.63797	0.430897	0.508992	308673	240147	117923	162791	477975	111674	131737	521914	188119	109735	193231	222055	127527	207074	118655	165645
PE(16:0p_22:3)	PE	M+H	754.575	15.272	C43 H81 O7 N1 P1	0.160029	1.96876e+06	381507	2.09949e+06	439801	0.93774	-0.092747	0.563524	0.634285	2.16188e+06	2.13596e+06	1.5555e+06	2.67804e+06	1.90273e+06	1.67507e+06	2.08985e+06	1.55109e+06	1.88677e+06	1.73615e+06	2.35958e+06	2.33435e+06	1.74982e+06	2.3659e+06	1.53083e+06	2.83249e+06
PE(18:0p_20:3)	PE	M+H	754.575	16.081	C43 H81 O7 N1 P1	0.340508	220502	53111	100171	33459.4	2.2012	1.1383	0.000939106	0.00397777	220908	182964	206942	231549	231008	171129	181016	338498	150114	68242.7	76439.8	139736	87238.7	121904	60882.8	96810.8
PE(38:4)	PE	M+Na	790.536	11.569	C43 H78 O8 N1 P1 Na1	1.88292	2.64316e+06	517554	6.054e+06	1.23185e+06	0.4366	-1.1956	0.000939106	0.00397777	3.13924e+06	2.37095e+06	1.8432e+06	2.49427e+06	3.27993e+06	2.18427e+06	3.16872e+06	2.66469e+06	5.19568e+06	5.01266e+06	5.77746e+06	7.82353e+06	5.42293e+06	5.9842e+06	5.09501e+06	8.12053e+06
PE(20:2_18:2)	PE	M+Na	790.536	12.0034	C43 H78 O8 N1 P1 Na1	1.18259	6.15832e+06	937073	7.86011e+06	908673	0.78349	-0.35201	0.00538494	0.0143212	6.80828e+06	6.3974e+06	5.34275e+06	5.89997e+06	7.60376e+06	4.85267e+06	6.93591e+06	5.4258e+06	8.89607e+06	6.96698e+06	9.10266e+06	7.54352e+06	7.96331e+06	6.82018e+06	8.55696e+06	7.03122e+06
PE(18:1_20:3)	PE	M+Na	790.536	12.3545	C43 H78 O8 N1 P1 Na1	0.294959	175157	206010	22660.1	15193.6	7.7298	2.9504	0.00740553	0.0183503	97187	95712.8	20197.3	159486	96201.9	54673.8	214665	663133	27611.2	10379.9	22416.4	2865.45	22749	54820.1	19096.3	21342.3
PE(38:4e)	PE	M+Na	776.556	13.3579	C43 H80 O7 N1 P1 Na1	1.42229	6.51777e+06	1.18962e+06	8.73082e+06	613984	0.74652	-0.42174	0.0027616	0.00834568	7.07864e+06	5.38665e+06	4.99968e+06	6.4302e+06	7.03695e+06	5.4985e+06	7.11035e+06	8.60115e+06	9.53301e+06	8.04991e+06	8.33618e+06	7.83501e+06	9.08263e+06	8.97253e+06	9.3545e+06	8.6828e+06
PE(16:0p_22:4)	PE	M+H	752.559	14.26	C43 H79 O7 N1 P1	0.826551	1.29197e+06	182978	657112	93796	1.9661	0.97537	0.000939106	0.00397777	1.38316e+06	1.29653e+06	1.09652e+06	1.18759e+06	1.64669e+06	1.21441e+06	1.40109e+06	1.1098e+06	719329	570120	726064	571545	793676	633538	711588	531032
PE(18:0p_20:4)	PE	M+H	752.559	15.0959	C43 H79 O7 N1 P1	3.57572	3.41371e+07	2.6903e+06	2.24772e+07	1.90435e+06	1.5187	0.60288	0.000939106	0.00397777	3.76271e+07	3.41503e+07	3.18874e+07	3.68168e+07	3.42313e+07	2.9906e+07	3.62771e+07	3.22004e+07	2.34322e+07	2.11541e+07	2.38272e+07	2.32009e+07	2.12934e+07	2.30314e+07	1.89318e+07	2.49467e+07
PE(20:3_18:2)	PE	M+Na	788.52	11.5753	C43 H76 O8 N1 P1 Na1	5.65759	1.76304e+07	3.09644e+06	4.74081e+07	9.20725e+06	0.37189	-1.4271	0.000939106	0.00397777	2.05451e+07	1.36394e+07	1.46929e+07	1.78994e+07	2.07556e+07	1.3843e+07	2.01237e+07	1.95443e+07	4.05906e+07	3.80452e+07	4.85743e+07	6.24481e+07	4.07284e+07	4.37487e+07	4.48021e+07	6.03274e+07
PE(20:4e_18:1)	PE	M+Na	774.541	12.1236	C43 H78 O7 N1 P1 Na1	0.826384	757119	39538.1	1.3753e+06	159102	0.55051	-0.86115	0.000939106	0.00397777	806476	709019	709566	740046	780727	761477	809730	739910	1.30253e+06	1.35768e+06	1.29376e+06	1.64548e+06	1.26349e+06	1.16991e+06	1.40322e+06	1.56629e+06
PE(38:5e)	PE	M+H	752.559	14.7235	C43 H79 O7 N1 P1	2.49073	9.27422e+06	479572	3.89529e+06	521840	2.3809	1.2515	0.000939106	0.00397777	9.45373e+06	8.70827e+06	9.23329e+06	8.66863e+06	9.40135e+06	9.39969e+06	1.019e+07	9.13875e+06	4.08041e+06	4.03418e+06	3.12505e+06	4.29399e+06	4.34605e+06	3.95055e+06	4.29417e+06	3.03792e+06
PE(16:0p_22:5)	PE	M+H	750.543	13.7884	C43 H77 O7 N1 P1	2.59484	1.84375e+07	2.20279e+06	1.20705e+07	611421	1.5275	0.61116	0.000939106	0.00397777	1.74533e+07	1.71368e+07	2.10091e+07	1.99693e+07	2.10765e+07	1.51121e+07	1.92285e+07	1.65147e+07	1.22738e+07	1.20935e+07	1.2072e+07	1.22702e+07	1.23833e+07	1.30033e+07	1.09445e+07	1.15235e+07
PE(18:3_20:3)	PE	M+Na	786.504	10.5592	C43 H74 O8 N1 P1 Na1	0.74714	221857	48518.8	742788	166345	0.29868	-1.7433	0.000939106	0.00397777	206395	222973	151396	260299	253108	155822	286577	238283	687320	601442	758944	931284	548301	808056	596844	1.01011e+06
PE(18:2_20:4)	PE	M+H	764.522	11.9781	C43 H75 O8 N1 P1	2.74138	2.3368e+07	3.25156e+06	1.57836e+07	1.56273e+06	1.4805	0.5661	0.00194753	0.00637467	2.56295e+07	2.21924e+07	2.417e+07	2.26896e+07	2.80303e+07	1.67102e+07	2.38952e+07	2.36265e+07	1.47754e+07	1.65532e+07	1.86058e+07	1.74509e+07	1.50506e+07	1.43827e+07	1.47445e+07	1.47059e+07
PE(16:0_22:6)	PE	M+H	764.522	12.6233	C43 H75 O8 N1 P1	5.51644	8.03309e+07	7.23611e+06	1.10046e+08	1.01243e+07	0.72997	-0.45409	0.00135938	0.00497765	7.75295e+07	8.09906e+07	6.66529e+07	8.40357e+07	8.74487e+07	7.663e+07	8.99356e+07	7.94241e+07	1.11246e+08	8.98865e+07	1.06178e+08	1.09997e+08	1.06864e+08	1.16747e+08	1.14614e+08	1.24838e+08
PE(18:2p_20:4)	PE	M+H	748.528	12.6208	C43 H75 O7 N1 P1	0.198714	305077	153382	402657	128742	0.75766	-0.40038	0.156254	0.220027	429637	181051	327081	497560	495688	159865	125254	224482	552523	485688	182323	442498	370298	245886	443076	498966
PE(16:0p_22:6)	PE	M+H	748.528	13.2675	C43 H75 O7 N1 P1	4.97879	8.21731e+07	6.173e+06	1.06335e+08	7.91784e+06	0.77278	-0.37187	0.000939106	0.00397777	9.10826e+07	8.10826e+07	8.25899e+07	7.83952e+07	8.25811e+07	7.17302e+07	8.98069e+07	8.01161e+07	1.11425e+08	1.00062e+08	9.86913e+07	1.03951e+08	1.0032e+08	1.02444e+08	1.12692e+08	1.21091e+08
PE(18:3_20:4)	PE	M+H	762.507	10.972	C43 H73 O8 N1 P1	0.17865	61615.1	15783.4	109607	50137.2	0.56214	-0.83099	0.0239487	0.0468347	92623.3	60751.1	51493.8	62116.1	67663.5	38124.2	53528.1	66620.6	78233.6	127751	82754.6	197645	43439.3	118340	73656.4	155039
PE(38:7)	PE	M+Na	784.489	11.3089	C43 H72 O8 N1 P1 Na1	0.0816512	36932.8	7622.37	49210.9	16006.3	0.7505	-0.41407	0.189263	0.257782	44609.9	30204	48214.5	33888.3	38078.7	39033.4	24277	37156.9	40564.3	35538.9	31999.1	36532.8	73145.1	66624.2	62998.9	46283.7
PE(38:7e)	PE	M+H	748.528	13.2727	C43 H75 O7 N1 P1	4.89431	8.38608e+07	4.45808e+06	1.0694e+08	7.93876e+06	0.78418	-0.35074	0.000939106	0.00397777	8.78442e+07	8.13964e+07	8.2613e+07	8.21271e+07	8.81901e+07	7.95189e+07	9.06784e+07	7.85182e+07	1.07101e+08	9.94675e+07	1.06845e+08	1.064e+08	9.25337e+07	1.11793e+08	1.15083e+08	1.163e+08
PE(16:1p_22:6)	PE	M+H	746.512	10.6821	C43 H73 O7 N1 P1	0.0785913	25671.3	5403.61	34003.7	5485.17	0.75496	-0.40554	0.0100817	0.023429	27877.8	27333.2	22321.8	29088.8	29378.5	18012.4	32801.6	18556.5	25019.4	29742.9	33279.3	38547.1	34091.8	36570.7	31864.4	42914.2
PE(39:0e)	PE	M+Na	798.635	17.9803	C44 H90 O7 N1 P1 Na1	0.0755745	134977	48544.1	153815	21534.2	0.87753	-0.18847	0.318425	0.399191	215540	121256	71185.1	174895	132133	78794.8	163752	122263	183816	139132	161626	162637	127068	152194	126852	177193
PE(19:0_20:2)	PE	M+Na	808.583	15.5879	C44 H84 O8 N1 P1 Na1	0.793592	1.3655e+06	1.04241e+06	2.3309e+06	309920	0.58582	-0.77146	0.0660819	0.107911	2.21774e+06	2.62814e+06	326488	2.64579e+06	590463	402799	1.70755e+06	405008	2.73884e+06	1.75278e+06	2.28348e+06	2.17472e+06	2.32809e+06	2.4464e+06	2.6824e+06	2.24051e+06
PE(39:3)	PE	M+Na	806.567	14.705	C44 H82 O8 N1 P1 Na1	4.04681	2.26135e+06	2.47284e+06	1.74783e+07	4.25987e+06	0.12938	-2.9503	0.000939106	0.00397777	348964	6.84081e+06	624577	1.22711e+06	1.30863e+06	5.52001e+06	1.46447e+06	756203	1.96055e+07	1.36902e+07	1.95788e+07	2.05533e+07	1.03585e+07	2.11281e+07	2.13462e+07	1.35655e+07
PE(17:0_22:6)	PE	M+H	778.538	13.2522	C44 H77 O8 N1 P1	2.33914	2.23928e+06	340001	7.1231e+06	1.06671e+06	0.31437	-1.6695	0.000939106	0.00397777	2.60754e+06	2.06011e+06	1.66785e+06	2.17344e+06	2.58455e+06	1.99916e+06	2.60434e+06	2.21723e+06	6.71075e+06	6.17052e+06	7.1737e+06	7.20493e+06	6.32972e+06	6.65761e+06	7.15869e+06	9.57891e+06
PE(17:1_22:6)	PE	M+H	776.522	11.9849	C44 H75 O8 N1 P1	1.05931	3.25718e+06	292521	4.44627e+06	591588	0.73256	-0.44897	0.000939106	0.00397777	3.3064e+06	3.38519e+06	2.85968e+06	3.04736e+06	3.40072e+06	2.88358e+06	3.58118e+06	3.59332e+06	4.78587e+06	3.70537e+06	4.67461e+06	3.87379e+06	5.13883e+06	3.70898e+06	5.02882e+06	4.65388e+06
PE(39:7)	PE	M+Na	798.504	11.9849	C44 H74 O8 N1 P1 Na1	0.121317	81463.7	12205.6	56545.7	29835.2	1.4407	0.52674	0.156254	0.220027	89970.6	92059.6	85055	87287.7	87083.6	80701	75317.6	54234.5	78888.3	45081.5	95552.3	21729	42960.7	38702.8	98116.3	31334.4
PE(18:1_22:0)	PE	M+Na	824.614	16.9107	C45 H88 O8 N1 P1 Na1	0.29771	139394	25394.3	230638	38836.7	0.60438	-0.72646	0.00135938	0.00497765	178463	140373	131095	158973	148039	112076	147359	98772.4	279004	161733	260130	235493	211933	211855	214242	270712
PE(18:0_22:2)	PE	M+Na	822.598	15.694	C45 H86 O8 N1 P1 Na1	0.0608281	383140	132948	408045	63084	0.93897	-0.090856	1	1	476453	514202	380616	513282	325188	258870	143845	452669	374001	341368	392423	495334	424513	370790	357179	508755
PE(20:1_20:2)	PE	M+Na	820.583	14.89	C45 H84 O8 N1 P1 Na1	0.750492	789544	218987	1.37376e+06	211201	0.57473	-0.79904	0.00135938	0.00497765	945154	842641	515676	732200	1.00121e+06	479833	1.08053e+06	719104	1.61035e+06	1.00199e+06	1.563e+06	1.49532e+06	1.19896e+06	1.30725e+06	1.52976e+06	1.28344e+06
PE(20:0_20:3)	PE	M+Na	820.583	15.3083	C45 H84 O8 N1 P1 Na1	1.95844	550913	169893	3.98289e+06	791579	0.13832	-2.8539	0.000939106	0.00397777	755251	490658	290056	743554	626923	426212	659408	415245	3.80988e+06	2.71531e+06	4.74866e+06	4.30614e+06	3.20547e+06	4.25954e+06	3.69682e+06	5.12125e+06
PE(20:1_20:3)	PE	M+Na	818.567	13.963	C45 H82 O8 N1 P1 Na1	1.56905	806314	112869	2.96029e+06	342969	0.27238	-1.8763	0.000939106	0.00397777	756676	849433	672442	863393	934637	677820	964700	731413	2.7824e+06	2.3937e+06	3.47611e+06	3.11436e+06	2.62317e+06	3.0374e+06	3.07587e+06	3.17929e+06
PE(18:0p_22:4)	PE	M+H	780.59	15.9815	C45 H83 O7 N1 P1	2.97452	1.20382e+07	1.92486e+06	4.07771e+06	509877	2.9522	1.5618	0.000939106	0.00397777	1.34743e+07	1.23645e+07	1.00785e+07	1.38389e+07	1.3608e+07	8.67156e+06	1.33321e+07	1.09378e+07	3.94694e+06	3.55904e+06	3.61207e+06	4.58574e+06	3.89861e+06	4.86742e+06	3.62703e+06	4.52486e+06
PE(20:0p_20:4)	PE	M+H	780.59	16.3497	C45 H83 O7 N1 P1	1.78261	7.63324e+06	1.03307e+06	4.52945e+06	791195	1.6852	0.75296	0.000939106	0.00397777	9.01884e+06	8.29399e+06	6.22231e+06	8.17965e+06	7.15385e+06	6.25791e+06	7.48126e+06	8.45815e+06	4.42171e+06	4.00654e+06	4.53358e+06	5.59817e+06	3.87255e+06	4.87773e+06	3.36883e+06	5.5565e+06
PE(18:1_22:4)	PE	M+Na	816.551	10.886	C45 H80 O8 N1 P1 Na1	0.40746	57411.4	33952.3	320762	309654	0.17898	-2.4821	0.318425	0.399191	42058.7	40547.4	26778.8	113740	35267.8	26999.8	98733.5	75165	552928	26488.1	704996	27333.3	558452	37668.9	46105.9	612121
PE(20:2_20:3)	PE	M+Na	816.551	11.443	C45 H80 O8 N1 P1 Na1	0.467259	82111	17637.4	276294	38768	0.29719	-1.7506	0.000939106	0.00397777	76837.7	82735	65568.5	80467.5	102607	58499.1	111799	78373.7	295202	250213	313990	318274	231893	221035	268590	311156
PE(18:0_22:5)	PE	M+Na	816.551	14.9592	C45 H80 O8 N1 P1 Na1	0.118897	505209	95147.3	548232	57592.1	0.92152	-0.11791	0.227147	0.301073	472275	672795	417180	444308	636228	449398	457330	492163	587823	462627	530041	592119	550272	576083	618413	468482
PE(40:5e)	PE	M+Na	802.572	16.3449	C45 H82 O7 N1 P1 Na1	0.318981	420720	47024.7	309551	47761.7	1.3591	0.44268	0.0027616	0.00834568	383021	512865	358507	424822	439474	387015	433119	426937	264130	309917	320499	406993	278424	293465	263198	339782
PE(18:0p_22:5)	PE	M+H	778.575	15.0847	C45 H81 O7 N1 P1	0.433798	1.26333e+07	1.5822e+06	1.19387e+07	1.53949e+06	1.0582	0.081589	0.430897	0.508992	1.37264e+07	1.23931e+07	1.22709e+07	1.28704e+07	1.41932e+07	1.07451e+07	1.46702e+07	1.0197e+07	1.32331e+07	9.77348e+06	1.30748e+07	1.16096e+07	1.09509e+07	1.3617e+07	1.00698e+07	1.31807e+07
PE(20:3_20:3)	PE	M+Na	814.536	11.9279	C45 H78 O8 N1 P1 Na1	0.126194	4.64038e+06	485500	4.48339e+06	1.27522e+06	1.035	0.049653	0.494837	0.568203	4.51751e+06	4.3279e+06	4.45711e+06	4.78889e+06	5.04045e+06	3.83362e+06	5.45712e+06	4.70044e+06	4.95871e+06	2.83494e+06	4.36983e+06	3.49808e+06	5.10684e+06	3.65265e+06	7.00833e+06	4.43774e+06
PE(18:0e_22:6)	PE	M+Na	800.556	13.4806	C45 H80 O7 N1 P1 Na1	0.439564	234947	24562	425333	79038.4	0.55238	-0.85625	0.000939106	0.00397777	249044	222690	200839	259502	240110	223147	272445	211802	480549	356533	429381	534251	285968	415143	409905	490933
PE(18:1p_22:5)	PE	M+H	776.559	14.2997	C45 H79 O7 N1 P1	1.57836	4.58255e+06	637428	2.21045e+06	611530	2.0731	1.0518	0.000939106	0.00397777	4.56669e+06	4.53015e+06	3.82941e+06	4.64827e+06	5.31335e+06	4.14939e+06	5.66101e+06	3.96216e+06	2.56346e+06	1.719e+06	2.16402e+06	1.35294e+06	3.0409e+06	2.148e+06	2.97333e+06	1.72194e+06
PE(18:0p_22:6)	PE	M+H	776.559	14.6536	C45 H79 O7 N1 P1	4.96158	8.27223e+07	1.02736e+07	1.09488e+08	1.21824e+07	0.75553	-0.40443	0.00194753	0.00637467	9.34638e+07	7.81278e+07	6.77779e+07	8.67733e+07	8.90582e+07	7.28314e+07	9.66241e+07	7.7122e+07	1.09651e+08	8.94458e+07	1.24446e+08	1.16187e+08	9.82179e+07	1.22238e+08	1.01792e+08	1.1393e+08
PE(18:1_22:6)	PE	M+Na	812.52	11.229	C45 H76 O8 N1 P1 Na1	0.635866	2.24869e+06	447836	1.6886e+06	302730	1.3317	0.41326	0.018129	0.0375566	2.50768e+06	1.92872e+06	1.77639e+06	2.86281e+06	2.61992e+06	1.86677e+06	2.6308e+06	1.79642e+06	1.89853e+06	1.139e+06	1.67685e+06	1.524e+06	1.75284e+06	1.54541e+06	2.16848e+06	1.80367e+06
PE(22:5_18:2)	PE	M+H	790.538	12.0047	C45 H77 O8 N1 P1	1.18259	6.15832e+06	937073	7.86011e+06	908673	0.78349	-0.35201	0.00538494	0.0143212	6.80828e+06	6.3974e+06	5.34275e+06	5.89997e+06	7.60376e+06	4.85267e+06	6.93591e+06	5.4258e+06	8.89607e+06	6.96698e+06	9.10266e+06	7.54352e+06	7.96331e+06	6.82018e+06	8.55696e+06	7.03122e+06
PE(40:7e)	PE	M+H	776.559	13.3613	C45 H79 O7 N1 P1	1.64176	5.7909e+06	915748	8.40992e+06	560359	0.68858	-0.5383	0.000939106	0.00397777	6.83518e+06	5.01812e+06	4.48988e+06	6.02807e+06	6.68857e+06	4.86287e+06	6.6649e+06	5.73962e+06	9.25746e+06	7.68872e+06	7.95456e+06	7.81777e+06	8.71057e+06	8.42125e+06	8.96502e+06	8.46404e+06
PE(18:2p_22:5)	PE	M+H	774.543	12.6461	C45 H77 O7 N1 P1	0.309563	31759.2	18716.1	120509	20973.9	0.26354	-1.9239	0.000939106	0.00397777	25725.3	20259	58563.3	11276.4	21063.3	27908.9	63137.2	26140.2	111106	159409	126510	102840	137855	96065.8	124455	105828
PE(18:1p_22:6)	PE	M+H	774.543	13.3621	C45 H77 O7 N1 P1	3.74649	4.53551e+07	5.22861e+06	5.9669e+07	4.73963e+06	0.76011	-0.39572	0.00135938	0.00497765	4.92575e+07	4.3348e+07	3.86202e+07	4.24989e+07	5.0019e+07	3.87689e+07	5.20631e+07	4.82649e+07	6.5692e+07	5.7981e+07	5.60639e+07	5.10216e+07	6.39937e+07	6.07893e+07	6.282e+07	5.89902e+07
PE(18:2_22:6)	PE	M+H	788.522	11.566	C45 H75 O8 N1 P1	5.53081	1.88664e+07	3.41503e+06	4.73988e+07	8.82361e+06	0.39804	-1.329	0.000939106	0.00397777	2.22846e+07	1.51225e+07	1.50855e+07	1.90396e+07	2.08053e+07	1.47592e+07	2.30049e+07	2.08298e+07	4.22903e+07	3.78929e+07	4.84595e+07	6.22959e+07	4.07324e+07	4.35964e+07	4.47173e+07	5.92053e+07
PE(20:4_20:4)	PE	M+H	788.522	11.8426	C45 H75 O8 N1 P1	0.616429	5.08048e+06	1.43284e+06	7.27656e+06	1.10161e+07	0.6982	-0.51829	0.103562	0.156612	5.13726e+06	4.63824e+06	3.75451e+06	4.63597e+06	4.29061e+06	8.45541e+06	4.63093e+06	5.10092e+06	2.52173e+06	1.16668e+06	1.10801e+06	2.90163e+07	1.20611e+06	1.2936e+06	1.48311e+06	2.04169e+07
PE(40:8e)	PE	M+H	774.543	12.6657	C45 H77 O7 N1 P1	0.295141	37522.3	22807	120509	20973.9	0.31137	-1.6833	0.000939106	0.00397777	25725.3	31428.2	58563.3	6401.94	31803.1	39134	80981.9	26140.2	111106	159409	126510	102840	137855	96065.8	124455	105828
PE(18:2p_22:6)	PE	M+H	772.528	12.1827	C45 H75 O7 N1 P1	2.46566	3.58527e+06	256741	8.93257e+06	959198	0.40137	-1.317	0.000939106	0.00397777	4.01663e+06	3.40012e+06	3.19388e+06	3.60518e+06	3.75124e+06	3.414e+06	3.75561e+06	3.54552e+06	8.34572e+06	9.00661e+06	8.03229e+06	1.06092e+07	7.80108e+06	9.10237e+06	8.60479e+06	9.9585e+06
PE(40:9)	PE	M+Na	808.489	10.5576	C45 H72 O8 N1 P1 Na1	0.183438	39511.1	24129.3	79800.1	17683.8	0.49513	-1.0141	0.0135873	0.0294907	30367.8	29958.2	22966.1	24752.8	26930.9	64543.7	89263.5	27305.6	77389.1	77170.6	76906.6	103559	56424.7	86718.2	57655.6	102577
PE(41:1e)	PE	M+Na	824.65	17.688	C46 H92 O7 N1 P1 Na1	0.570902	1.18587e+06	410563	1.66851e+06	313682	0.71073	-0.49262	0.0313241	0.0589837	1.24765e+06	1.24911e+06	604684	1.31581e+06	1.826e+06	808081	1.58038e+06	855233	1.58071e+06	1.18681e+06	1.61981e+06	2.10065e+06	1.39255e+06	2.0253e+06	1.8807e+06	1.56157e+06
PE(19:0_22:5)	PE	M+H	808.585	15.4024	C46 H83 O8 N1 P1	1.00149	176891	51790.2	1.06367e+06	171466	0.1663	-2.5881	0.000939106	0.00397777	209108	178268	91684.7	174597	123163	173542	258968	205801	1.2091e+06	748775	1.09842e+06	1.01899e+06	1.04024e+06	1.02085e+06	1.34419e+06	1.02876e+06
PE(18:1_24:1)	PE	M+H	828.648	17.8167	C47 H91 O8 N1 P1	0.291967	58038.6	19816.6	139375	23325.1	0.41642	-1.2639	0.000939106	0.00397777	81633.7	60911.5	27355.9	75405.1	68879.8	39499	70556.1	40067.9	165275	103864	126061	116003	163233	143004	134748	162811
PE(22:0_20:3)	PE	M+Na	848.614	16.5246	C47 H88 O8 N1 P1 Na1	0.51197	58702.5	16649.8	294909	57684.5	0.19905	-2.3288	0.000939106	0.00397777	80760	60715.4	41461.6	62154.4	65756.6	47277.5	77461.4	34033.3	360274	185335	331545	263828	288192	297665	272947	359486
PE(20:3_22:1)	PE	M+Na	846.598	15.2347	C47 H86 O8 N1 P1 Na1	0.436868	83812.7	18247.6	257140	43661.2	0.32594	-1.6173	0.000939106	0.00397777	94545.6	93060.7	52714.7	99490.2	80895.6	65846.8	107019	76928.5	247745	172957	290029	276943	221848	286291	253321	307987
PE(20:0p_22:4)	PE	M+H	808.621	17.135	C47 H87 O7 N1 P1	0.956489	1.28985e+06	225780	453164	86963.8	2.8463	1.5091	0.000939106	0.00397777	1.36579e+06	1.15203e+06	968646	1.67855e+06	1.27457e+06	1.09794e+06	1.49173e+06	1.28951e+06	419522	424445	442063	602158	331133	517670	375439	512882
PE(20:0p_22:5)	PE	M+H	806.606	16.31	C47 H85 O7 N1 P1	0.696792	1.57415e+06	133908	1.05421e+06	265327	1.4932	0.5784	0.000939106	0.00397777	1.63538e+06	1.60341e+06	1.47775e+06	1.84817e+06	1.61602e+06	1.43922e+06	1.4616e+06	1.51164e+06	1.00746e+06	927148	1.23294e+06	1.37715e+06	713660	1.15669e+06	687058	1.3316e+06
PE(42:6)	PE	M+Na	842.567	15.3147	C47 H82 O8 N1 P1 Na1	0.208969	13953.2	8282.52	54230.4	9235.55	0.25729	-1.9585	0.000939106	0.00397777	7372.52	19926.3	1818.23	8125.96	12387.3	24457.5	13253.6	24283.8	46651.5	45786	60119.7	51613.6	44201	55963.8	57622.6	71885.1
PE(20:1p_22:5)	PE	M+H	804.59	15.4476	C47 H83 O7 N1 P1	0.0464147	270624	68659.3	284325	33536.9	0.95181	-0.07125	0.636502	0.703383	302810	256158	193372	249225	341729	176952	377787	266958	316502	236033	313560	306438	230567	283772	287164	300562
PE(20:0p_22:6)	PE	M+H	804.59	15.9155	C47 H83 O7 N1 P1	2.05792	1.33808e+07	2.89446e+06	1.881e+07	3.56647e+06	0.71137	-0.49134	0.0135873	0.0294907	1.4982e+07	1.42992e+07	7.86838e+06	1.50713e+07	1.44014e+07	1.02475e+07	1.67166e+07	1.34596e+07	1.77664e+07	1.63166e+07	2.1303e+07	2.1488e+07	1.28922e+07	2.02947e+07	1.65213e+07	2.38975e+07
PE(42:7e)	PE	M+Na	826.572	15.9143	C47 H82 O7 N1 P1 Na1	0.576202	525447	74650.9	835427	71561.4	0.62896	-0.66897	0.000939106	0.00397777	541845	598575	378288	527716	584659	459804	588026	524666	872000	754987	920643	882267	712972	888982	809445	842123
PE(20:1p_22:6)	PE	M+H	802.575	14.5847	C47 H81 O7 N1 P1	1.27272	1.0175e+06	132211	2.54548e+06	524850	0.39973	-1.3229	0.000939106	0.00397777	1.12775e+06	870006	799887	1.09379e+06	1.0139e+06	971244	1.19101e+06	1.07241e+06	2.6718e+06	1.93685e+06	3.32876e+06	2.95928e+06	1.81176e+06	2.55484e+06	2.21962e+06	2.88089e+06
PE(20:2_22:6)	PE	M+Na	838.536	11.7823	C47 H78 O8 N1 P1 Na1	0.00256278	323973	93996.5	323020	78465.7	1.003	0.0042513	0.958122	0.972038	315003	421770	209861	412264	283196	232540	455962	261188	395513	253251	253836	361935	262845	293741	469131	293907
PE(20:3_22:6)	PE	M+Na	836.52	10.8179	C47 H76 O8 N1 P1 Na1	0.926204	647128	209918	1.49438e+06	306840	0.43304	-1.2074	0.000939106	0.00397777	715097	649663	498060	926414	740688	553506	834860	258736	1.37973e+06	1.04255e+06	1.60427e+06	1.37096e+06	1.41708e+06	1.29638e+06	1.96373e+06	1.88037e+06
PE(20:3_23:0)	PE	M+Na	862.63	17.094	C48 H90 O8 N1 P1 Na1	0.277851	11520.3	5164.67	80695.2	15746.3	0.14276	-2.8083	0.000939106	0.00397777	11089.2	13653	2331.33	14278.5	16716.1	7016.78	17692.8	9384.84	87127.8	57156.5	101552	70193.1	90082.1	68851	72570.1	98028.7
PE(22:4_22:6)	PE	M+H	840.554	12.2637	C49 H79 O8 N1 P1	0.299739	120648	33696.7	33551.7	10640.6	3.5959	1.8463	0.000939106	0.00397777	144996	70274.1	151524	153444	123549	104909	141600	74888.6	35016.1	14920.5	42303.6	28347.2	36346	50295	34712.9	26472.4
PE(44:12)	PE	M+Na	858.504	10.8206	C49 H74 O8 N1 P1 Na1	0.277411	65830.7	15471.5	137258	16954.4	0.47961	-1.0601	0.000939106	0.00397777	71737.7	58953.4	61047.4	87383.2	76559.2	56281.2	76778.2	37905	144520	105378	148041	125865	139911	133413	137694	163239
PE(24:1_20:3)	PE	M+Na	874.63	16.434	C49 H90 O8 N1 P1 Na1	0.339349	27983.6	6176.21	134875	33806.8	0.20748	-2.269	0.000939106	0.00397777	40232.3	24328.9	20691.8	32598.3	29261	25122.5	28048.2	23585.5	152959	94061.2	126483	123717	134377	132928	108202	206269
PE(24:0_20:4)	PE	M+H	852.648	17.8611	C49 H91 O8 N1 P1	0.370874	99135.9	19594	235175	56738.7	0.42154	-1.2463	0.000939106	0.00397777	137883	103283	99931.8	88909.8	102896	85779.2	104325	70079.4	285223	178699	246580	196758	217829	215995	192319	347999
PE(45:0)	PE	M+Na	896.708	20.706	C50 H100 O8 N1 P1 Na1	0.100277	48566.8	61142.9	78791	46938.9	0.6164	-0.69806	0.226805	0.301073	25899.4	64983.5	4.07469e-06	16820	111701	4.07469e-06	165444	3686.16	122721	941.04	141132	102734	33653.6	96226.1	53668.8	79251.2
PE(22:6_23:0)	PE	M+H	862.632	17.107	C50 H89 O8 N1 P1	0.293468	11467.4	5104.36	88490.2	17326.8	0.12959	-2.948	0.000939106	0.00397777	13278.4	13214.3	2216.75	13670.5	15882.3	6768.11	17651.1	9057.32	108857	58459.3	101917	69000.1	100007	87434.5	84915.3	97331.5
PE(46:6)	PE	M+Na	898.63	17.5533	C51 H90 O8 N1 P1 Na1	0.115266	213.953	605.151	13412.2	5892.69	0.015952	-5.9701	0.000553535	0.00397777	4.07469e-06	1711.63	4.07469e-06	4.07469e-06	4.07469e-06	4.07469e-06	4.07469e-06	4.07469e-06	21624.7	6399.73	17772.9	7394.52	13171	9097.57	11447.7	20389.6
PE(24:1_22:6)	PE	M+H	874.632	16.4264	C51 H89 O8 N1 P1	0.344237	29968.7	5976.15	138354	30799.9	0.21661	-2.2068	0.000939106	0.00397777	40570.5	27102.6	22441.7	35157.7	31558.9	24215.1	31521	27182.2	148859	117953	127345	126473	135330	133542	108697	208637
PE(47:0)	PE	M+Na	924.739	26.62	C52 H104 O8 N1 P1 Na1	0.0820996	13172.6	14055.5	1950.01	1982.53	6.7552	2.756	0.0313241	0.0589837	2548.83	888.546	10159.3	1298.37	13184	32119.9	37298.9	7883.2	893.557	4922.13	2372.72	62.0829	513.361	1299.26	533.19	5003.81
PE(49:2)	PE	M+H	926.757	26.6402	C54 H105 O8 N1 P1	0.050202	9067.49	6394.04	4249.65	3505.41	2.1337	1.0934	0.0831229	0.13017	1180.63	6651.25	12112.8	6124.45	1000.43	16788.6	17495.3	11186.5	8731.63	5004.94	8433.49	15.5147	588.609	4091.08	776.616	6355.36
PE(49:3)	PE	M+Na	946.724	20.479	C54 H102 O8 N1 P1 Na1	0.219424	138631	33802.6	81418.6	24633.9	1.7027	0.76782	0.0027616	0.00834568	200146	142313	93360.8	172026	120920	114922	125992	139368	79168.4	113563	55113.2	52315.2	117484	88561.2	63565.4	81578.1
PEt(16:0_17:0)	PEt	M+H	691.527	5.4771	C38 H76 O8 N0 P1	0.584451	835167	420991	1.39811e+06	561951	0.59736	-0.74334	0.0405689	0.0719971	608143	433721	818337	1.04223e+06	1.66516e+06	752505	1.02796e+06	333276	1.78982e+06	947131	1.72706e+06	2.13916e+06	1.10955e+06	1.70639e+06	1.37639e+06	389361
PEt(17:0_18:1)	PEt	M+H	717.543	5.43631	C40 H78 O8 N0 P1	0.122308	974878	187963	1.04399e+06	204396	0.9338	-0.098811	0.494837	0.568203	1.32039e+06	1.14447e+06	708518	898263	886911	858101	976211	1.00616e+06	1.16299e+06	975377	869524	783408	1.37706e+06	1.25382e+06	1.02709e+06	902626
PEt(18:0_19:0)	PEt	M+H	747.59	7.624	C42 H84 O8 N0 P1	0.215347	459645	192191	590470	244873	0.77844	-0.36134	0.270149	0.348585	554018	303061	395703	536136	846984	314528	476430	250300	698086	340163	628428	958004	658840	771539	476351	192352
PEt(19:1_18:1)	PEt	M+H	743.559	5.704	C42 H80 O8 N0 P1	0.0495013	43946.9	36774.5	57125.8	49831.4	0.7693	-0.37838	0.318425	0.399191	129532	43868.4	19539.4	35294.8	22357.8	23396.2	22520.4	55066.4	38639.4	40441.7	23206.6	25223.2	172552	51491.3	28229.4	77223.3
PEt(52:2)	PEt	M+Na	975.775	7.15278	C57 H109 O8 N0 P1 Na1	0.0417335	10802.4	3266.13	7598.41	3267.31	1.4217	0.50759	0.0660819	0.107911	6697.65	7452.24	12612.9	7645.27	14860.3	11614.2	14829.9	10707	3854.32	5157.89	12510	6461.43	9043.25	4781.28	11955.3	7023.81
PEt(52:5)	PEt	M+H	947.746	7.21337	C57 H104 O8 N0 P1	0.0346636	9873.18	954.13	7938.35	2133.75	1.2437	0.31468	0.0520296	0.0879514	8843.76	8590.39	9485.27	10384.1	10933.3	10172.5	11209.5	9366.6	6033.78	7680.71	8117.88	5894.27	9531.85	11852.8	5615.48	8780.1
PEt(54:3)	PEt	M+H	979.809	8.852	C59 H112 O8 N0 P1	0.0262664	5089.4	1064.74	3929.01	1039.31	1.2953	0.37333	0.0313241	0.0589837	5064.67	5621.98	5140.38	4850.1	7350.75	4479.15	4390.28	3817.89	3716.79	3950.32	4201.02	4198.76	3308.66	3910.78	5935.96	2209.75
PEt(54:5)	PEt	M+H	975.778	7.20526	C59 H108 O8 N0 P1	0.0442373	12028.4	1712.38	9080.08	2748.32	1.3247	0.40566	0.103562	0.156612	10728	10596.8	12506.6	11067.7	14611	11512.9	14607	10597.1	5248.22	6645.5	12361.4	6364.73	10915.5	8508.96	11840.1	10756.1
PG(17:0_17:0)	PG	M+H	751.548	13.7951	C40 H80 O10 N0 P1	1.78046	8.95862e+06	1.11935e+06	5.92525e+06	296021	1.5119	0.5964	0.000939106	0.00397777	8.68231e+06	8.1537e+06	1.00932e+07	9.6316e+06	1.03584e+07	7.22544e+06	9.55764e+06	7.96663e+06	5.92373e+06	5.98514e+06	5.99181e+06	6.06407e+06	6.03871e+06	6.34056e+06	5.32077e+06	5.73721e+06
PG(16:0_18:1)	PG	M+NH4	766.559	13.1269	C40 H81 O10 N1 P1	2.76872	1.91837e+07	1.63867e+06	1.21814e+07	1.15674e+06	1.5748	0.65519	0.000939106	0.00397777	1.86273e+07	1.95273e+07	2.25319e+07	1.9399e+07	1.98821e+07	1.69551e+07	1.82927e+07	1.82541e+07	1.15464e+07	1.26635e+07	1.04863e+07	1.39004e+07	1.09711e+07	1.33629e+07	1.23811e+07	1.21398e+07
PG(34:1)	PG	M+NH4	766.559	15.335	C40 H81 O10 N1 P1	0.303883	127213	25785.4	40065.9	17110.5	3.1751	1.6668	0.000939106	0.00397777	111020	146732	161607	138528	145845	96518.3	127797	89658	22367.2	28868.1	32199.8	69214.9	39667.8	49671.4	21869	56669.2
PG(18:0_18:0)	PG	M+H	779.58	14.8371	C42 H84 O10 N0 P1	2.09505	5.62655e+06	655820	1.77409e+06	209296	3.1715	1.6652	0.000939106	0.00397777	6.5922e+06	5.41228e+06	5.15938e+06	5.88951e+06	5.7297e+06	5.07523e+06	6.42128e+06	4.73283e+06	1.74167e+06	1.60865e+06	1.98916e+06	1.68505e+06	1.41068e+06	1.842e+06	1.85802e+06	2.05748e+06
PG(36:0)	PG	M+H	779.58	15.095	C42 H84 O10 N0 P1	0.397047	5.58529e+06	741060	6.03928e+06	819588	0.92483	-0.11274	0.227147	0.301073	6.39243e+06	5.43403e+06	5.53616e+06	5.71325e+06	6.00423e+06	4.83205e+06	6.46397e+06	4.3062e+06	6.76359e+06	4.76655e+06	6.72679e+06	6.03685e+06	5.4674e+06	6.76741e+06	5.12314e+06	6.66251e+06
PG(19:1_17:0)	PG	M+H	777.564	13.8225	C42 H82 O10 N0 P1	0.0992306	2.13047e+06	395873	2.0585e+06	238982	1.035	0.049582	0.958122	0.972038	2.09773e+06	1.59527e+06	2.57553e+06	2.24476e+06	2.55838e+06	1.75242e+06	2.47828e+06	1.74142e+06	2.27924e+06	1.78129e+06	2.17509e+06	1.80871e+06	2.31899e+06	2.32777e+06	1.88454e+06	1.89235e+06
PG(18:0_18:1)	PG	M+H	777.564	14.3242	C42 H82 O10 N0 P1	0.0888608	2.4035e+06	256304	2.54113e+06	2.10478e+06	0.94584	-0.080332	0.103562	0.156612	2.47339e+06	2.37886e+06	2.11985e+06	2.45901e+06	2.68714e+06	2.11416e+06	2.80509e+06	2.1905e+06	1.67932e+06	5.7721e+06	1.27967e+06	960704	1.84221e+06	1.47292e+06	1.25255e+06	6.06955e+06
PG(36:1)	PG	M+NH4	794.591	14.953	C42 H85 O10 N1 P1	4.88922	5.06861e+07	1.06126e+07	2.67298e+07	3.29566e+06	1.8962	0.92314	0.000939106	0.00397777	5.78212e+07	5.62908e+07	3.20453e+07	4.87972e+07	6.18193e+07	3.88553e+07	6.01784e+07	4.96815e+07	2.96023e+07	1.97693e+07	2.59456e+07	2.64134e+07	2.6386e+07	2.6583e+07	3.0653e+07	2.84858e+07
PG(18:1_18:1)	PG	M+H	775.548	13.3591	C42 H80 O10 N0 P1	2.79546	2.27557e+07	2.2786e+06	3.03134e+07	2.00274e+06	0.75068	-0.41373	0.000939106	0.00397777	2.44318e+07	2.09385e+07	1.87595e+07	2.45209e+07	2.33769e+07	2.11042e+07	2.55165e+07	2.33976e+07	3.32074e+07	2.9217e+07	2.86751e+07	2.72923e+07	3.2599e+07	3.10693e+07	3.0886e+07	2.95612e+07
PG(18:1_18:2)	PG	M+H	773.533	12.0899	C42 H78 O10 N0 P1	1.58974	2.12908e+06	115393	4.38809e+06	513783	0.48519	-1.0434	0.000939106	0.00397777	2.37049e+06	1.99852e+06	2.09138e+06	2.11123e+06	2.16081e+06	2.06597e+06	2.19083e+06	2.04338e+06	4.17429e+06	4.24708e+06	4.15856e+06	5.26e+06	3.64558e+06	4.36215e+06	4.24014e+06	5.01691e+06
PG(36:3)	PG	M+Na	795.515	12.0899	C42 H77 O10 N0 P1 Na1	0.400104	420598	101876	243236	43461.1	1.7292	0.79008	0.00740553	0.0183503	357757	452531	544905	422092	471095	517487	373418	225498	260528	260682	304056	251817	256703	208191	246835	157076
PG(37:1)	PG	M+H	791.58	13.937	C43 H84 O10 N0 P1	0.363436	129819	83700.7	276590	38937.1	0.46936	-1.0912	0.0100817	0.023429	77487.5	129036	64869.5	126594	133388	72600.3	325649	108927	291487	246165	342919	286371	275322	280642	283272	206538
PG(38:3)	PG	M+NH4	818.591	13.931	C44 H85 O10 N1 P1	0.159682	1.76437e+06	369401	1.88299e+06	306636	0.937	-0.093875	0.372029	0.452003	1.64614e+06	1.74729e+06	1.29229e+06	1.77931e+06	2.34697e+06	1.44766e+06	2.26292e+06	1.5924e+06	1.63601e+06	1.32341e+06	2.28704e+06	1.88109e+06	1.84391e+06	2.00509e+06	2.20604e+06	1.88138e+06
PG(38:4)	PG	M+NH4	816.575	10.1146	C44 H83 O10 N1 P1	0.103685	5713.62	1290.05	16942.7	5833.2	0.33723	-1.5682	0.000939106	0.00397777	7742.24	6596.09	3337.25	5639.12	5181.65	5350.16	5386.73	6475.75	16774.8	14189.2	17948.6	26960.1	9989.22	21299.3	9356.51	19024.3
PG(38:5)	PG	M+Na	819.515	11.3677	C44 H77 O10 N0 P1 Na1	0.0263847	28557.9	11003	25204.2	8771.92	1.1331	0.18023	0.494837	0.568203	34773.2	17476.7	40389.6	27329.5	44831.9	23069.7	27815.7	12777.1	34423.8	14749.2	22610.8	18794.8	40647.2	17773	26719.4	25915.3
PG(18:1_22:6)	PG	M+NH4	838.559	10.8113	C46 H81 O10 N1 P1	0.203232	34438.9	9734.44	76123.4	17275.7	0.45241	-1.1443	0.000939106	0.00397777	43788.9	32454.8	26066.3	44221.6	37380.9	24594	45725.9	21279	73940.3	51825.2	84459.7	71030.7	76425.7	60756.1	109917	80633.3
PG(20:4_22:6)	PG	M+NH4	860.544	9.34773	C48 H79 O10 N1 P1	0.0772074	63662.1	16311.2	51760.7	9757.93	1.2299	0.29858	0.156254	0.220027	42761.5	46972.1	60054.3	82291.3	62279.8	67330.7	90624.1	56982.6	55531.1	35994.7	64576.6	44195.3	45368.5	48916.9	61426.5	58075.7
PG(22:5_22:5)	PG	M+NH4	888.575	10.7386	C50 H83 O10 N1 P1	0.0537711	29171.7	7433.82	22945.2	7962.55	1.2714	0.34638	0.227147	0.301073	22171.2	29702.4	28744.3	27201.8	31895.9	28984.9	44705.6	19967.2	20261.7	8930.15	23619.3	28346.1	22039.9	16389.9	30710.3	33264.1
PG(22:5_22:6)	PG	M+NH4	886.559	9.87805	C50 H81 O10 N1 P1	0.148465	63818.7	18378.7	37140.8	8490.06	1.7183	0.78097	0.0100817	0.023429	35375	43961	80267	81659.9	58654.9	74704.2	81976.1	53951.1	45643.6	32534.8	44436.4	28889	26270.9	33012.8	49566.9	36772.3
PG(22:6_22:6)	PG	M+NH4	884.544	9.03302	C50 H79 O10 N1 P1	0.166276	51118.1	25354.9	87577.3	20198.5	0.58369	-0.77672	0.0100817	0.023429	23694	19032.4	76609.9	90574.1	35651.2	65984.3	44228	53171.3	97836.4	95414	109655	61766.3	55809.2	77067.1	105158	97911.5
PG(48:0)	PG	M+NH4	964.794	19.233	C54 H111 O10 N1 P1	0.286862	92502.2	60842.2	225263	148854	0.41064	-1.2841	0.0660819	0.107911	36104.7	141970	107445	9860.96	176466	30632	140839	96700.5	230364	336922	6201.15	405895	279420	148699	357980	36626.3
PI(34:0)	PI	M+Na	861.546	11.8583	C43 H83 O13 N0 P1 Na1	0.193448	48373.8	12204.3	87492.4	16919.5	0.55289	-0.85493	0.000939106	0.00397777	50774.2	50728	51545.8	36638.4	48084.9	56790	26173.4	66255.7	87208.9	94034.2	68453.6	72623.8	72567.2	103305	84342.1	117405
PI(18:0_18:0)	PI	M+Na	889.578	13.4658	C45 H87 O13 N0 P1 Na1	0.24043	69472.4	17596.6	127022	19203.5	0.54693	-0.87057	0.000939106	0.00397777	97586.1	57640.1	58590.5	51341.2	86432.5	60638.7	86156.8	57393.5	138078	105393	139800	113578	119170	162834	109621	127706
PI(18:0_18:1)	PI	M+Na	887.562	12.9013	C45 H85 O13 N0 P1 Na1	0.514233	1.80473e+06	174910	1.4865e+06	162525	1.2141	0.27987	0.00740553	0.0183503	1.67928e+06	1.72631e+06	1.92305e+06	1.76652e+06	2.05363e+06	2.03081e+06	1.66133e+06	1.59694e+06	1.49665e+06	1.45351e+06	1.70155e+06	1.21424e+06	1.39199e+06	1.71018e+06	1.50168e+06	1.42216e+06
PI(18:1_18:1)	PI	M+Na	885.546	11.5976	C45 H83 O13 N0 P1 Na1	0.21245	214524	29094.6	160111	28840.7	1.3398	0.42206	0.0100817	0.023429	212042	161853	238996	184125	221894	248898	214206	234174	175956	129764	135820	132198	214887	168923	171629	151711
PI(18:0_18:2)	PI	M+NH4	880.591	13.1429	C45 H87 O13 N1 P1	0.46111	81903.6	20313.1	280687	63704.2	0.2918	-1.777	0.000939106	0.00397777	74006.1	113518	78019.2	47454.2	75314.8	100407	94099.5	72410.5	332007	303951	269060	376442	172944	308073	257327	225694
PI(16:0_20:3)	PI	M+Na	883.531	11.0946	C45 H81 O13 N0 P1 Na1	0.0779013	12767.4	6581.59	21273.9	5165.79	0.60014	-0.73662	0.0239487	0.0468347	3502.82	10565	11533.7	8695.79	9802.12	19480.4	13999.4	24559.9	19117.5	15279.8	29629.3	15493.1	17860.3	25633.5	22691.2	24486.3
PI(18:1_18:2)	PI	M+NH4	878.575	11.8373	C45 H85 O13 N1 P1	0.251488	350934	122703	243542	66308.6	1.441	0.52703	0.0239487	0.0468347	303447	369819	232662	316247	359490	290642	635908	299258	222923	182616	195934	250230	389365	234442	274364	198461
PI(16:0_20:4)	PI	M+NH4	876.56	11.5167	C45 H83 O13 N1 P1	0.0146024	136560	21774.4	139324	22967.6	0.98016	-0.028913	0.958122	0.972038	143494	115297	131084	100527	157139	169081	139573	136285	105556	129936	149194	126011	117332	168647	152838	165080
PI(18:0_20:3)	PI	M+NH4	906.607	13.471	C47 H89 O13 N1 P1	0.27676	107487	21994.9	183064	24650.2	0.58716	-0.76819	0.000939106	0.00397777	121761	107299	135518	80746.4	138134	91937	96526.4	87976.4	215431	163324	160114	165237	168852	224177	177423	189958
PI(18:0_20:4)	PI	M+H	887.564	12.9005	C47 H84 O13 N0 P1	0.514233	1.80473e+06	174910	1.4865e+06	162525	1.2141	0.27987	0.00740553	0.0183503	1.67928e+06	1.72631e+06	1.92305e+06	1.76652e+06	2.05363e+06	2.03081e+06	1.66133e+06	1.59694e+06	1.49665e+06	1.45351e+06	1.70155e+06	1.21424e+06	1.39199e+06	1.71018e+06	1.50168e+06	1.42216e+06
PI(18:1_20:4)	PI	M+H	885.549	11.59	C47 H82 O13 N0 P1	0.21245	214524	29094.6	160111	28840.7	1.3398	0.42206	0.0100817	0.023429	212042	161853	238996	184125	221894	248898	214206	234174	175956	129764	135820	132198	214887	168923	171629	151711
PI(16:0_22:6)	PI	M+NH4	900.56	11.1209	C47 H83 O13 N1 P1	0.0836926	32556.1	18767.5	46184.8	9611.1	0.70491	-0.50449	0.0313241	0.0589837	18510.5	20804.4	19970.6	21341.6	36775.1	75265.8	33381.5	34399.4	52218.3	40629.1	41656.4	29789.4	47312.4	55023.4	60248.5	42600.5
PI(40:4)	PI	M+NH4	932.622	12.8814	C49 H91 O13 N1 P1	0.200527	75234	24910.1	29028.2	19165.8	2.5918	1.3739	0.00538494	0.0143212	105483	64878.8	41735.3	66574.5	90517.4	106869	45790.4	80023.6	55755.3	19361	21527.3	4.07469e-06	42427.6	52173	19147.2	21834.4
PI(18:0_22:5)	PI	M+NH4	930.607	12.9035	C49 H89 O13 N1 P1	0.0673411	76324.6	19724.8	62267.4	31386.7	1.2258	0.29367	0.189263	0.257782	98437.2	60855.5	71953.2	56725.5	101412	98436.1	57679.8	65097.3	56974.1	55963.1	104854	4.07469e-06	56060.2	92087.4	75589.4	56610.7
PI(18:0_22:6)	PI	M+NH4	928.591	12.5135	C49 H87 O13 N1 P1	0.478172	193502	28053.2	418184	92435.5	0.46272	-1.1118	0.000939106	0.00397777	195812	180565	185499	174991	193014	255482	201215	161436	448997	380312	579227	282550	411379	363784	507329	371897
PI(52:3)	PI	M+NH4	1102.83	18.411	C61 H117 O13 N1 P1	0.121934	4256.01	2866.22	23037.5	15201.2	0.18474	-2.4364	0.0027616	0.00834568	5176.32	5192.41	2854.03	3708.73	2694.79	4426.69	9995.14	4.07469e-06	28553.8	8522.98	33615.8	7119.74	21516.3	5250.2	31910.7	47810.7
PIP(36:4e)	PIP	M+H	925.52	7.97	C45 H83 O15 N0 P2	0.202091	20051.4	8566.04	63284.8	22338.3	0.31684	-1.6582	0.000939106	0.00397777	24636.6	15016.7	26582.5	32017.6	24109.7	13616.4	19313	5118.35	43106.9	56957.2	74977.3	62938	32448.2	67532.5	61044.4	107274
PIP(50:0)	PIP	M+Na	1165.76	16.9076	C59 H116 O16 N0 P2 Na1	0.0404921	29397.3	10686.5	23336.4	16060.5	1.2597	0.3331	0.318425	0.399191	32057.4	31824	32949.5	45509.8	23401.4	35204.9	25567.2	8664.01	20574	5221.68	13966.6	13011.9	36491.5	29774.5	54329.8	13321
PIP(50:1)	PIP	M+Na	1163.75	16.1077	C59 H114 O16 N0 P2 Na1	0.192332	26445	14286	68714.8	24538.5	0.38485	-1.3776	0.00387604	0.0109285	35847	13828.2	44483.1	32669.4	17965.4	22067.7	40955.1	3744.08	61292.6	27676.4	57501	60616.6	89514.1	85918.8	107187	60012.3
PIP(50:2)	PIP	M+Na	1161.73	15.2328	C59 H112 O16 N0 P2 Na1	0.139476	20632.9	11890.9	43981.4	12734.1	0.46913	-1.0919	0.00740553	0.0183503	38740.7	20505.9	18773	37798.5	16207.5	13953.7	14714.4	4369.5	30000	30044.6	56268.8	38595.7	38195.6	42875.4	49531.5	66339.8
PIP(52:1)	PIP	M+Na	1191.78	16.8798	C61 H118 O16 N0 P2 Na1	0.251074	214642	58404.3	130722	48371.1	1.642	0.71543	0.018129	0.0375566	237819	196452	297245	268184	176473	227998	206076	106889	87249.8	80647.8	92702.3	144885	151271	230047	124780	134196
PIP(52:2)	PIP	M+Na	1189.76	16.488	C61 H116 O16 N0 P2 Na1	0.0590046	560695	170911	599596	343358	0.93512	-0.096775	0.792896	0.837939	778501	465652	500525	776221	639286	438223	600610	286540	538450	257711	1.01494e+06	262736	585412	395129	1.20966e+06	532732
PIP(52:3)	PIP	M+Na	1187.75	15.2438	C61 H114 O16 N0 P2 Na1	0.891282	514914	187629	1.38367e+06	490399	0.37214	-1.4261	0.000939106	0.00397777	765071	627831	413257	701807	508116	449336	486365	167525	1.04501e+06	1.07745e+06	1.37342e+06	1.73084e+06	848567	1.25495e+06	1.33136e+06	2.40773e+06
PIP(54:2)	PIP	M+Na	1217.79	17.0114	C63 H120 O16 N0 P2 Na1	0.153322	99393	32101	64766.2	17941.7	1.5346	0.6179	0.0313241	0.0589837	131742	95631	111861	137823	101963	110378	58571	47174.9	67632.4	43570.3	73565.4	37810.7	52391.6	84638.4	82698.4	75822.1
PIP(54:3)	PIP	M+Na	1215.78	16.2874	C63 H118 O16 N0 P2 Na1	0.224088	268512	83372.2	185020	64490	1.4513	0.5373	0.0520296	0.0879514	396216	266912	242383	356436	278848	237883	251201	118220	162135	119099	155325	127167	170721	237225	193006	315485
PIP(54:4)	PIP	M+Na	1213.76	15.5251	C63 H116 O16 N0 P2 Na1	0.233658	89462.8	80758.8	179309	77378.2	0.49893	-1.0031	0.018129	0.0375566	98434.9	49417	64066.2	281299	72517.3	17886.1	63205.2	68876.4	89028.1	234409	132641	80790.1	251423	171586	295846	178753
PIP(54:5)	PIP	M+Na	1211.75	15.2202	C63 H114 O16 N0 P2 Na1	0.0643761	50743.1	21109.2	62695.8	20088	0.80935	-0.30516	0.372029	0.452003	86317.5	40789.2	36238.7	58235.6	61880.8	39631.1	64522.8	18329.4	45066.4	51071.6	57113	59393.8	37738.1	97277	69490.2	84416.6
PIP(56:5)	PIP	M+Na	1239.78	16.3397	C65 H118 O16 N0 P2 Na1	0.27521	96877.7	27206.6	22352.8	17247.4	4.334	2.1157	0.00135938	0.00497765	96142.8	109274	106039	131493	81954.4	122386	82469.3	45263.3	18348.2	14904.1	8859.74	4477.19	29821.6	53481.3	39884	9046.06
PIP(56:6)	PIP	M+Na	1237.76	15.6139	C65 H116 O16 N0 P2 Na1	0.0709772	186799	54106.3	163315	78381.8	1.1438	0.19383	0.494837	0.568203	244637	181103	130351	257677	180996	236962	141389	121280	155816	110143	139713	52007.2	183416	295104	250157	120166
PIP(56:7)	PIP	M+Na	1235.75	14.8039	C65 H114 O16 N0 P2 Na1	0.42846	199887	89891.7	414263	121416	0.48251	-1.0514	0.00387604	0.0109285	339869	180226	94612.4	291879	208047	176021	232422	76023.3	407194	328092	327872	256381	425173	498939	650928	419527
PIP2(50:2)	PIP2	M+NH4	1236.74	15.6704	C59 H117 O19 N1 P3	0.0358053	6100.4	4789.23	9122.17	3402.5	0.66874	-0.58047	0.188937	0.257782	6093.41	9602.96	3993.35	13305.8	10248.8	4.07469e-06	5558.86	4.07469e-06	11660.7	6650.75	7644.67	4719.6	6054.98	11821.4	14571.2	9854.02
PIP2(51:3)	PIP2	M+H	1231.72	15.213	C60 H114 O19 N0 P3	0.0292374	4.07469e-06	0	1533.34	2140.39	2.6574e-09	-28.487	0.0764479	0.124564	4.07469e-06	4.07469e-06	4.07469e-06	4.07469e-06	4.07469e-06	4.07469e-06	4.07469e-06	4.07469e-06	4.07469e-06	4.07469e-06	3405.45	4.07469e-06	4.07469e-06	4.07469e-06	4330.56	4530.69
PS(34:0e)	PS	M+H	750.564	12.047	C40 H81 O9 N1 P1	0.092316	21067.2	9983.58	8518.51	8817.39	2.4731	1.3063	0.0311998	0.0589837	19032.6	14450	37323	24280.5	13045.3	31167.1	6691.89	22547.2	20298.9	5241.75	10486.1	1719.32	22622.8	4.07469e-06	7779.12	4.07469e-06
PS(18:0_18:1)	PS	M+Na	812.541	13.0721	C42 H80 O10 N1 P1 Na1	0.233089	366251	90663.7	280692	42611	1.3048	0.38385	0.0313241	0.0589837	316090	428890	526957	353531	392719	393240	279309	239273	251920	339655	314735	225723	302064	232368	314800	264272
PS(18:0_20:4)	PS	M+H	812.544	13.0709	C44 H79 O10 N1 P1	0.234232	362797	92196.7	276858	38365	1.3104	0.39002	0.0520296	0.0879514	313996	426370	526030	351443	387035	390398	276866	230241	252471	324688	301154	226004	301199	232318	314937	262095
PS(18:1_24:0)	PS	M+H	874.653	17.707	C48 H93 O10 N1 P1	0.0677627	2216.44	2907.14	8645.23	5601.9	0.25638	-1.9637	0.0172872	0.0374691	3126.52	4.07469e-06	8283.52	4.07469e-06	2950.18	4.07469e-06	4.07469e-06	3371.29	10399.2	15657.9	11520.9	5111.9	1171.05	659.164	12327.7	12314
PS(22:4_22:4)	PS	M+H	888.575	10.281	C50 H83 O10 N1 P1	0.0485693	20261.7	6214.2	15676.2	3405.11	1.2925	0.37018	0.127808	0.186204	13097.5	14120.7	32496.4	21035	23246.3	17542.4	22987.5	17567.5	18480.4	11746.6	14340.3	21164.2	10924.8	17067.4	16675.8	15009.9
SM(d31:0)	SM	M+H	663.544	8.90196	C36 H76 O6 N2 P1	0.0452952	9875.03	3266.95	13271.4	2737.39	0.74409	-0.42646	0.103562	0.156612	13827.2	5871.66	11370.8	8448.14	12183.2	5675.85	8158.86	13464.6	15598	16970	9998.22	11025.3	10662.3	13742.9	16236.7	11937.5
SM(d31:1)	SM	M+H	661.528	10.2468	C36 H74 O6 N2 P1	0.0243938	8593.96	1342.72	7178.79	2433.94	1.1971	0.25958	0.227147	0.301073	10404	8480.81	7298.61	8430.95	10108.1	6992.26	9692.62	7344.3	10047.6	5808.52	8395.66	2707.3	9416.85	5234.87	7788.41	8031.12
SM(d32:2)	SM	M+H	673.528	9.64261	C37 H74 O6 N2 P1	0.0931944	17690	2915.61	9369.74	1303.67	1.888	0.91685	0.000939106	0.00397777	14195.2	17581.1	22236.3	16340	16052.7	17291.4	15832.5	21990.9	11101.9	8821.67	9720.57	8359.67	8812.95	7241.37	10823.6	10076.1
SM(d17:1_16:0)	SM	M+Na	711.541	11.8743	C38 H77 O6 N2 P1 Na1	0.304664	168353	23707	76964	31728.3	2.1874	1.1292	0.00135938	0.00497765	155866	160309	180806	165858	196974	189168	176715	121132	105583	71431.7	98309.3	34402.1	122527	45191.7	88132.1	50135
SM(d33:1)	SM	M+H	689.559	11.8743	C38 H78 O6 N2 P1	1.16744	3.72725e+06	344389	2.41462e+06	385395	1.5436	0.62632	0.000939106	0.00397777	3.75135e+06	3.59473e+06	4.13259e+06	3.54508e+06	4.25578e+06	3.29002e+06	3.87205e+06	3.37636e+06	2.87846e+06	2.28878e+06	2.54652e+06	1.99096e+06	2.69312e+06	1.80357e+06	2.80263e+06	2.31288e+06
SM(d18:1_16:0)	SM	M+Na	725.557	12.6104	C39 H79 O6 N2 P1 Na1	0.181519	131993	39918.8	85916.3	21097.4	1.5363	0.61946	0.0135873	0.0294907	100101	126886	214973	129309	146536	138892	78839.6	120411	98087.2	130291	73419.1	83498.3	71342.7	66281.1	92474.7	71936
SM(d18:2_16:0)	SM	M+Na	723.541	11.2378	C39 H77 O6 N2 P1 Na1	0.114529	46539.6	15222.3	28087.3	10072	1.657	0.72854	0.018129	0.0375566	41133.7	60041.5	66108.3	35871.2	48310.3	62055.9	22987.5	35808.2	25769.9	33350.6	32302.8	30432.5	7522.1	22404.8	31053.2	41862.5
SM(d34:2)	SM	M+H	701.559	11.2378	C39 H78 O6 N2 P1	1.12922	2.86413e+06	773588	1.46913e+06	337211	1.9495	0.96314	0.00194753	0.00637467	2.06031e+06	2.82269e+06	4.30399e+06	2.47198e+06	2.42752e+06	3.36726e+06	2.08378e+06	3.37552e+06	2.17843e+06	1.62896e+06	1.28432e+06	1.15635e+06	1.45563e+06	1.143e+06	1.57207e+06	1.33424e+06
SM(d17:1_17:1)	SM	M+H	701.559	12.044	C39 H78 O6 N2 P1	0.208122	88304.6	36451.5	34654.3	22024.4	2.5482	1.3495	0.0100817	0.023429	90308.9	93630.8	133462	62644.5	24598.4	97931.6	69926.5	133934	37515.2	22287.1	18301.6	7053.03	69584.7	27269.9	64855.5	30367.2
SM(d34:4)	SM	M+H	697.528	11.047	C39 H74 O6 N2 P1	0.249916	78520.3	4862.29	24245.9	5935.47	3.2385	1.6953	0.000939106	0.00397777	82575	87652.5	76718.5	77159.5	75949	78692.5	71183.3	78232.3	25813.4	34609.9	25162	27681.2	26250.5	20074.4	18421.8	15953.9
SM(d35:0)	SM	M+H	719.606	13.9441	C40 H84 O6 N2 P1	0.15181	72675.5	6241.86	108875	41764.4	0.66751	-0.58313	0.127808	0.186204	64194	79339.9	76289.4	63432.9	73498	76668.2	69642.6	78338.9	154832	130003	69973	111769	54377.9	74890.4	103245	171907
SM(d35:1)	SM	M+H	717.591	13.4111	C40 H82 O6 N2 P1	0.948054	3.55088e+06	270616	2.67358e+06	247491	1.3281	0.4094	0.000939106	0.00397777	3.60677e+06	3.65166e+06	3.07252e+06	3.28399e+06	3.81217e+06	3.48904e+06	3.585e+06	3.90589e+06	2.56209e+06	2.97655e+06	2.7037e+06	2.93962e+06	2.62268e+06	2.19767e+06	2.5859e+06	2.80046e+06
SM(d35:2)	SM	M+H	715.575	12.0261	C40 H80 O6 N2 P1	0.300981	331098	49224.1	229023	44543.2	1.4457	0.53177	0.00194753	0.00637467	327067	307690	366492	268910	323603	327397	296482	431141	193893	302919	249409	256748	248289	158997	217384	204542
SM(d35:4)	SM	M+H	711.544	11.8482	C40 H76 O6 N2 P1	0.291416	156882	24837.9	72190.6	29519.8	2.1732	1.1198	0.00135938	0.00497765	141070	144549	166243	159506	193813	175399	163151	111322	96025	64677.8	92700.3	33466.6	117575	44082.9	81631.7	47365.3
SM(d36:0)	SM	M+H	733.622	14.7018	C41 H86 O6 N2 P1	0.682497	2.06556e+06	172776	1.53393e+06	311443	1.3466	0.4293	0.00387604	0.0109285	2.02641e+06	2.24676e+06	1.87013e+06	1.8981e+06	2.27249e+06	2.15248e+06	1.86275e+06	2.19538e+06	1.24177e+06	1.58904e+06	1.42258e+06	2.10696e+06	1.13873e+06	1.53136e+06	1.42219e+06	1.81879e+06
SM(d18:0_18:1)	SM	M+H	731.606	13.358	C41 H84 O6 N2 P1	0.204449	55644.5	15872.4	13804.7	11019.8	4.0308	2.0111	0.000939106	0.00397777	52632.2	29846.4	55318.4	80185.2	54129.9	57938	42195	72910.9	5324.78	21539	645.865	19139.7	4.07469e-06	11969.7	29764.3	22054.6
SM(d36:1)	SM	M+H	731.606	14.187	C41 H84 O6 N2 P1	2.82851	1.7963e+07	2.17933e+06	1.04264e+07	1.50694e+06	1.7228	0.78479	0.000939106	0.00397777	1.47717e+07	1.96695e+07	1.61513e+07	1.74733e+07	1.80614e+07	2.13321e+07	1.65074e+07	1.97373e+07	1.01578e+07	1.35864e+07	1.01015e+07	1.16404e+07	9.23975e+06	9.0308e+06	1.01312e+07	9.52299e+06
SM(d18:1_18:1)	SM	M+H	729.591	12.8084	C41 H82 O6 N2 P1	1.47476	3.16988e+06	545614	1.18807e+06	109845	2.6681	1.4158	0.000939106	0.00397777	2.59336e+06	3.6832e+06	3.58214e+06	2.81471e+06	2.61915e+06	3.71292e+06	2.63198e+06	3.72155e+06	1.29349e+06	1.26457e+06	1.24498e+06	1.27656e+06	1.0021e+06	1.06412e+06	1.2356e+06	1.12314e+06
SM(d36:3)	SM	M+H	727.575	12.0213	C41 H80 O6 N2 P1	0.2916	98858.3	50152.9	8438.21	7320.65	11.716	3.5504	0.000939106	0.00397777	68394.6	192291	76212.3	100199	50601.8	83025.5	62091.5	158051	7151.3	24996.6	6387.36	6512.03	9346.28	4078.46	4.07469e-06	9033.68
SM(d18:1_18:3)	SM	M+H	725.559	12.5484	C41 H78 O6 N2 P1	0.181519	131993	39918.8	85916.3	21097.4	1.5363	0.61946	0.0135873	0.0294907	100101	126886	214973	129309	146536	138892	78839.6	120411	98087.2	130291	73419.1	83498.3	71342.7	66281.1	92474.7	71936
SM(d36:5)	SM	M+H	723.544	11.437	C41 H76 O6 N2 P1	0.0993541	56333.6	27207.6	37629.2	6604.44	1.4971	0.58214	0.0405689	0.0719971	46747.9	61642.9	116594	46265.8	40539.3	51548.7	24485.9	62844.1	51272.3	37127.5	37593.8	34454.5	34229.6	34148.2	29758.3	42449.7
SM(d37:0)	SM	M+H	747.637	15.3254	C42 H88 O6 N2 P1	0.405531	46663.8	12133.3	199962	49162.9	0.23336	-2.0994	0.000939106	0.00397777	22496.8	35784.2	56456.8	50812.5	53128.4	48541	59687	46403.6	143429	201854	181783	281570	154744	194556	177410	264355
SM(d18:1_19:0)	SM	M+H	745.622	16.9739	C42 H86 O6 N2 P1	0.0738152	148265	200221	107542	177524	1.3787	0.46328	0.874826	0.905144	36100.1	30664.8	65095.5	81587.1	40685.7	29055.3	580309	322622	40154.8	17503.3	70966.2	38360.9	42610.3	43177.3	545083	62481.2
SM(d38:0)	SM	M+H	761.653	16.0073	C43 H90 O6 N2 P1	0.670771	2.31744e+06	415868	2.96714e+06	524573	0.78104	-0.35654	0.0405689	0.0719971	2.22445e+06	2.74183e+06	1.87662e+06	2.4509e+06	2.81624e+06	1.5917e+06	2.50154e+06	2.33625e+06	2.70857e+06	2.52076e+06	2.72871e+06	3.71919e+06	2.3835e+06	3.28506e+06	2.69991e+06	3.69141e+06
SM(d18:1_20:1)	SM	M+H	757.622	13.9714	C43 H86 O6 N2 P1	0.286637	46280	15294.1	124148	23808.6	0.37278	-1.4236	0.000939106	0.00397777	36583.2	40550.1	18475.3	56870	66472.8	42960.6	47754.2	60574	96078.6	151470	107112	99977.2	120724	149918	152539	115361
SM(d38:2)	SM	M+H	757.622	14.2555	C43 H86 O6 N2 P1	1.6435	8.2745e+06	809807	1.10033e+07	1.0206e+06	0.752	-0.4112	0.00135938	0.00497765	7.17398e+06	8.82286e+06	7.55011e+06	7.69803e+06	8.67037e+06	8.75109e+06	7.94109e+06	9.5885e+06	1.15018e+07	1.13621e+07	1.27341e+07	1.0884e+07	1.07092e+07	9.42195e+06	1.14622e+07	9.95131e+06
SM(d38:6)	SM	M+H	749.559	14.982	C43 H78 O6 N2 P1	0.385467	93160.2	57614.4	302669	199870	0.3078	-1.7	0.0831229	0.13017	132544	137693	97557	113582	4287.89	121229	526.949	137863	89198.5	95523.3	448405	612908	231683	121681	332193	489762
SM(d20:0_19:0)	SM	M+H	775.669	16.6247	C44 H92 O6 N2 P1	0.462008	171357	41766.9	371207	53426.5	0.46162	-1.1152	0.000939106	0.00397777	211600	212180	107101	158786	188583	130133	216215	146257	317021	341263	311504	416154	362060	403521	351756	466376
SM(d20:0_19:1)	SM	M+H	773.653	15.9561	C44 H90 O6 N2 P1	2.09845	3.6257e+06	1.11259e+06	7.73389e+06	789287	0.46881	-1.0929	0.000939106	0.00397777	4.3027e+06	3.69034e+06	1.69543e+06	4.3529e+06	4.37935e+06	2.21627e+06	4.80444e+06	3.56416e+06	7.35504e+06	6.16287e+06	8.00026e+06	7.79951e+06	8.04933e+06	7.42128e+06	8.24765e+06	8.83514e+06
SM(d39:1)	SM	M+H	773.653	16.5506	C44 H90 O6 N2 P1	0.0604093	207936	98468.7	185434	71376	1.1214	0.16524	1	1	290066	402707	138515	152457	224388	110419	211188	133751	257180	223312	149841	41370.2	190754	158240	199235	263537
SM(d39:2)	SM	M+H	771.637	15.1375	C44 H88 O6 N2 P1	0.74042	518315	85673.4	1.01057e+06	84878.6	0.51289	-0.96327	0.000939106	0.00397777	571702	582562	436402	435315	521285	427644	667850	503756	996080	1.03092e+06	1.05803e+06	959255	1.10197e+06	873298	940949	1.12405e+06
SM(d18:1_21:1)	SM	M+H	771.637	16.8589	C44 H88 O6 N2 P1	0.0225513	103341	34428.6	108320	25721.9	0.95403	-0.067887	0.958122	0.972038	86867.2	100684	161143	130671	98774.6	86194.9	117495	44897.6	81740.7	125652	85441.9	127563	70319.1	124494	111136	140212
SM(d39:4)	SM	M+H	767.606	14.8368	C44 H84 O6 N2 P1	0.39623	74946.3	18477.9	215857	28981.4	0.3472	-1.5261	0.000939106	0.00397777	63339.1	77318.4	49774.3	50637.1	91199.1	87424	81115.7	98762.3	211049	210740	216354	228216	223889	214301	263909	158401
SM(d39:6)	SM	M+H	763.575	13.888	C44 H80 O6 N2 P1	0.481885	2.26074e+06	347617	2.655e+06	375879	0.8515	-0.23192	0.0520296	0.0879514	1.99206e+06	2.41103e+06	2.7034e+06	1.87604e+06	2.8151e+06	2.06577e+06	2.20382e+06	2.01871e+06	2.65536e+06	2.38706e+06	3.3044e+06	2.83989e+06	2.41562e+06	3.01958e+06	2.18308e+06	2.43505e+06
SM(d39:8)	SM	M+H	759.544	5.408	C44 H76 O6 N2 P1	0.0517757	32151.6	22386.8	22942.5	15304	1.4014	0.48686	0.430897	0.508992	60097	53629	15481.9	16572.2	8322.07	21093.4	19814.7	62202.3	13717.7	25977.5	7677.33	6881.96	38006.2	21749.1	18237.7	51292.8
SM(d18:1_22:0)	SM	M+Na	809.651	16.758	C45 H91 O6 N2 P1 Na1	0.880911	3.8131e+06	582596	4.78638e+06	535105	0.79666	-0.32797	0.00740553	0.0183503	3.76995e+06	4.38505e+06	2.96029e+06	3.54975e+06	4.70839e+06	3.23792e+06	4.1495e+06	3.74398e+06	5.03634e+06	3.74801e+06	5.21342e+06	4.8231e+06	4.54872e+06	4.8643e+06	5.52862e+06	4.52852e+06
SM(d40:3)	SM	M+H	783.637	14.2643	C45 H88 O6 N2 P1	0.252695	631857	80935	728107	68123.7	0.86781	-0.20455	0.0239487	0.0468347	468164	680944	649378	613622	686922	632755	586655	736416	738917	815657	733183	761706	724682	583633	769637	697442
SM(d20:0_20:4)	SM	M+H	781.622	15.5565	C45 H86 O6 N2 P1	1.09229	595294	128978	1.6474e+06	158102	0.36135	-1.4685	0.000939106	0.00397777	493791	609349	442664	504830	750044	689885	497556	774234	1.5514e+06	1.50906e+06	1.58421e+06	1.70349e+06	1.83227e+06	1.63855e+06	1.90716e+06	1.4531e+06
SM(d40:7)	SM	M+H	775.575	11.0741	C45 H80 O6 N2 P1	0.034643	7606.65	3957.64	10628.3	4944.87	0.7157	-0.48258	0.318425	0.399191	9455.57	3104.47	9968.83	9379.25	4658.38	8402.62	2124.88	13759.2	18016.1	5711.96	13441.6	7050.01	15259.6	5595.58	6507.14	13444.7
SM(d41:0)	SM	M+H	803.7	17.6856	C46 H96 O6 N2 P1	0.618301	298221	48979.5	645644	81872.8	0.4619	-1.1144	0.000939106	0.00397777	315013	346168	260723	312362	338399	241492	346899	224709	573752	655829	739341	744771	586810	603280	537571	723802
SM(d18:1_23:0)	SM	M+Na	823.666	17.302	C46 H93 O6 N2 P1 Na1	1.10066	1.9948e+06	269131	3.15266e+06	347356	0.63273	-0.66033	0.000939106	0.00397777	2.0404e+06	2.16148e+06	1.68455e+06	1.77349e+06	2.37733e+06	1.64249e+06	2.23857e+06	2.04009e+06	3.20095e+06	2.54312e+06	3.54936e+06	3.48047e+06	3.20644e+06	2.72709e+06	3.26552e+06	3.24836e+06
SM(d41:3)	SM	M+H	797.653	14.941	C46 H90 O6 N2 P1	0.672133	799689	203235	1.28632e+06	196434	0.62169	-0.68574	0.00387604	0.0109285	827037	611302	792889	1.23418e+06	676598	601371	890646	763484	1.13556e+06	1.34816e+06	1.54611e+06	1.58421e+06	1.22266e+06	1.19451e+06	1.01618e+06	1.2432e+06
SM(d18:1_23:3)	SM	M+H	795.637	15.9247	C46 H88 O6 N2 P1	0.428334	433504	97869.5	637530	83378	0.67997	-0.55645	0.0027616	0.00834568	489681	472791	327641	376692	519785	284612	568683	428144	616135	562566	510286	675574	769603	670618	703411	592044
SM(d41:5)	SM	M+H	793.622	18.2717	C46 H86 O6 N2 P1	0.0879536	64277.9	20846.7	42678.8	46338	1.5061	0.5908	0.0405689	0.0719971	80051.5	103687	49797.4	56680.5	68593.9	40086.2	69524.3	45801.4	16585.1	22106.3	26563.9	14899.1	11812.4	38995.3	150524	59945.2
SM(d41:8)	SM	M+H	787.575	11.93	C46 H80 O6 N2 P1	0.278093	8988.55	5995.54	90420.4	43967	0.099408	-3.3305	0.000939106	0.00397777	19178	6765.38	12292.7	3563.91	14971.4	8223.96	1887.02	5026	56525.2	105309	69375.6	180735	42982.7	78294.3	71396.5	118746
SM(d18:1_24:0)	SM	M+H	815.7	17.7776	C47 H96 O6 N2 P1	2.028	3.73364e+07	2.33012e+06	4.32628e+07	5.62292e+06	0.86301	-0.21254	0.0239487	0.0468347	3.47957e+07	4.00361e+07	4.07394e+07	3.52748e+07	3.90858e+07	3.5315e+07	3.62068e+07	3.72376e+07	4.81051e+07	4.10194e+07	4.73836e+07	4.26937e+07	3.87535e+07	3.49517e+07	4.09459e+07	5.22494e+07
SM(d18:1_24:1)	SM	M+H	813.684	16.6389	C47 H94 O6 N2 P1	1.08419	8.79985e+07	8.14439e+06	9.17272e+07	5.94112e+06	0.95935	-0.059871	0.372029	0.452003	8.1003e+07	9.94066e+07	9.30768e+07	8.45889e+07	8.01385e+07	8.17449e+07	8.44424e+07	9.95868e+07	9.59444e+07	9.20008e+07	8.16611e+07	1.01975e+08	9.1952e+07	9.30258e+07	8.76456e+07	8.96126e+07
SM(d42:4)	SM	M+H	809.653	14.3114	C47 H90 O6 N2 P1	0.293183	350990	202706	198170	58138.1	1.7712	0.82469	0.127808	0.186204	113382	384703	671910	226412	210138	439989	178209	583179	186323	313368	198527	229254	165723	108138	196938	187092
SM(d18:1_24:3)	SM	M+H	809.653	16.7578	C47 H90 O6 N2 P1	0.925341	3.79399e+06	599917	4.8425e+06	550430	0.78348	-0.35204	0.00740553	0.0183503	3.75879e+06	4.37705e+06	2.95454e+06	3.52861e+06	4.70992e+06	3.13397e+06	4.14841e+06	3.74062e+06	4.67383e+06	3.74552e+06	5.19866e+06	4.83667e+06	4.60224e+06	4.86396e+06	5.58394e+06	5.23516e+06
SM(d42:5)	SM	M+H	807.637	15.627	C47 H88 O6 N2 P1	0.500729	502207	148851	797475	150733	0.62975	-0.66716	0.00538494	0.0143212	422337	509466	401823	387783	538826	421051	844918	491449	850923	725003	803570	641130	1.08405e+06	670499	920964	683659
SM(d42:7)	SM	M+H	803.606	10.618	C47 H84 O6 N2 P1	0.0677798	7727.41	1541.14	15447.7	9767.07	0.50023	-0.99934	0.156254	0.220027	7853.01	7401.91	7851.39	7370.83	10887.5	6118.96	5910.44	8425.23	5574.19	13440.9	11189.7	31188.6	7412.39	19605.5	7353.93	27816.5
SM(d20:1_23:1)	SM	M+Na	849.682	17.176	C48 H95 O6 N2 P1 Na1	0.206269	79277.9	11562.8	122099	16528	0.64929	-0.62306	0.000939106	0.00397777	66636.6	88032.7	87310.9	62630.6	92614.3	71489.9	75858.9	89649.6	130697	117620	101852	133399	130851	92670.8	137378	132323
SM(d43:3)	SM	M+H	825.684	16.1866	C48 H94 O6 N2 P1	0.269804	342577	49551.8	436259	62562.4	0.78526	-0.34876	0.0100817	0.023429	373019	372306	289594	425035	340818	269829	348438	321579	416004	405464	504266	528871	392521	382390	367226	493334
SM(d43:4)	SM	M+H	823.669	17.1812	C48 H92 O6 N2 P1	0.370369	915145	998394	1.44758e+06	1.47861e+06	0.63219	-0.66157	0.0831229	0.13017	280994	148788	1.82795e+06	228627	2.72435e+06	1.6238e+06	295558	191087	3.41844e+06	302285	383613	400176	3.32837e+06	2.92683e+06	376682	444251
SM(d43:5)	SM	M+H	821.653	16.0352	C48 H90 O6 N2 P1	0.355187	263939	43727.8	389008	34496.8	0.67849	-0.55959	0.000939106	0.00397777	221765	292650	257189	212264	310831	216126	278777	321912	414501	337313	371239	413245	445300	381974	389260	359235
SM(d43:6)	SM	M+H	819.637	17.879	C48 H88 O6 N2 P1	0.0567192	97691.7	100253	76248.4	75410.7	1.2812	0.35753	0.713191	0.769972	289114	2262.34	131587	18232	193472	36668.2	37544.1	72654.4	86582.1	105204	30324.6	88047.9	12572.9	18118.4	240346	28790.6
SM(d44:3)	SM	M+H	839.7	16.7174	C49 H96 O6 N2 P1	0.0778661	223032	57139.3	200284	46306.9	1.1136	0.1552	0.494837	0.568203	165973	246613	316852	186851	164794	243480	179706	279990	157443	276407	181649	257125	148055	174741	189253	217604
[truncated: 2,232 more rows]
