# Supplementary material for: The impact of dapagliflozin for the myocardial metabolomic profiles of mice with chronic heart failure induced by a high fat diet
Source: Research Square preprint supplement (doi:10.21203/rs.3.rs-6881055/v1), 2025-06-25
Supplement: Supplementary file 7 [file 43c13d36faf61afea7442c30.xlsx]

## Sheet: normalized
Peak names	Mass-to-charge ratio	Retention indices	Retention times(min)	Chow1	Chow2	Chow3	Chow4	Chow5	Chow6	Chow7	Chow8	DAPA1	DAPA2	DAPA3	DAPA4	DAPA5	DAPA6	DAPA7	DAPA8	HDF1	HDF2	HDF3	HDF4	HDF5	HDF6	HDF7	HDF8	QC1	QC2	QC3	QC4	QC5	QC6	QC7
M100T336	100.076	335.8	5.6	731708	2.13956e+06	1.49938e+06	773437	782251	626200	1.33202e+06	186244	753527	544129	1.37748e+06	464095	1.3495e+06	1.4352e+06	1.29787e+06	1.21145e+06	1.19519e+06	1.21729e+06	761164	977032	691511	643088	959504	1.51777e+06	1.22869e+06	1.36032e+06	1.35821e+06	1.35884e+06	1.32432e+06	1.36096e+06	1.09225e+06
M100T343	100.076	343.1	5.7	4.2657e+06	602750	2.1928e+06	7.09583e+06	2.26015e+06	2.0245e+06	2.21375e+06	7.51918e+06	3.20554e+06	7.55324e+06	2.87759e+06	5.94276e+06	9.72929e+06	3.24239e+06	6.71275e+06	7.02584e+06	8.96531e+06	6.52917e+06	5.56269e+06	2.48335e+06	1.14558e+07	2.66258e+06	2.55072e+06	1.15972e+07	5.1793e+06	3.87591e+06	3.91121e+06	4.61204e+06	4.00174e+06	4.82761e+06	3.91953e+06
M100T72	100.024	71.8	1.2	1.9795e+07	1.49091e+07	1.7111e+07	1.87533e+07	1.6119e+07	1.59222e+07	2.13216e+07	1.90287e+07	2.12924e+07	2.24218e+07	1.85698e+07	2.45708e+07	1.76156e+07	2.27954e+07	1.85319e+07	2.10043e+07	1.8841e+07	2.23281e+07	1.99719e+07	1.67762e+07	1.88211e+07	1.99715e+07	1.88721e+07	2.09564e+07	1.85119e+07	1.85151e+07	1.85213e+07	1.90168e+07	2.06046e+07	1.85632e+07	1.8527e+07
M101T119	101.06	118.6	2	7.63987e+06	7.06789e+06	7.90745e+06	7.89086e+06	9.09562e+06	9.35554e+06	8.55152e+06	7.9619e+06	9.06184e+06	8.21064e+06	9.35127e+06	7.94577e+06	8.00223e+06	7.65529e+06	8.67791e+06	7.65798e+06	8.69293e+06	8.03763e+06	7.96347e+06	7.02935e+06	7.52658e+06	8.0358e+06	6.94175e+06	1.00949e+07	7.96106e+06	8.2986e+06	7.63114e+06	6.98728e+06	8.52624e+06	8.34799e+06	7.8451e+06
M101T468	101.023	468	7.8	136021	137053	189081	150625	152699	115624	90017.5	140533	108010	186566	162211	204328	72941.6	200042	270477	145019	191386	153784	171316	178845	169486	165378	143660	77550.2	154661	153266	159305	159325	176670	150665	159736
M101T64	101.06	64.5	1.1	4.22542e+06	5.29491e+06	3.9101e+06	6.81291e+06	5.14543e+06	3.76742e+06	4.97462e+06	5.23204e+06	3.0151e+06	3.83564e+06	3.28504e+06	3.23064e+06	3.22046e+06	5.08138e+06	3.66404e+06	3.74535e+06	6.44559e+06	2.58605e+06	8.06153e+06	6.15529e+06	6.97599e+06	3.47928e+06	2.90572e+06	4.29366e+06	4.28338e+06	4.23167e+06	4.78277e+06	4.47948e+06	4.35964e+06	4.35553e+06	4.83647e+06
M101T72	101.025	71.7	1.2	2.62891e+06	2.47279e+06	3.0816e+06	794556	2.36848e+06	2.12794e+06	2.893e+06	2.92274e+06	3.29974e+06	4.17303e+06	933508	3.71535e+06	4.01908e+06	4.41616e+06	3.71507e+06	4.08085e+06	3.51171e+06	3.32357e+06	3.31942e+06	3.77122e+06	3.10089e+06	3.35045e+06	3.33735e+06	4.05398e+06	2.7801e+06	2.9036e+06	2.70739e+06	2.89447e+06	2.77802e+06	2.06014e+06	2.89034e+06
M101T807	100.51	807.1	13.5	3.24734e+06	2.23572e+06	3.36838e+06	3.62965e+06	3.51403e+06	716618	1.27515e+06	1.18057e+06	2.83707e+06	2.30146e+06	2.56212e+06	3.1379e+06	1.4799e+06	2.81122e+06	5.38257e+06	3.04248e+06	2.27144e+06	1.43004e+06	5.9141e+06	3.8298e+06	3.69508e+06	2.89137e+06	2.78349e+06	4.99695e+06	3.28156e+06	3.00005e+06	2.99859e+06	3.20792e+06	3.19678e+06	2.79753e+06	3.20781e+06
M101T85	101.071	85.3	1.4	1.70682e+07	1.67249e+07	1.10595e+07	2.03355e+07	2.72405e+07	1.92797e+07	1.06326e+07	2.3752e+07	1.5737e+07	1.57675e+07	1.78944e+07	1.38926e+07	7.70238e+06	1.08816e+07	1.36773e+07	1.22929e+07	1.80008e+07	1.51339e+07	2.86451e+07	1.92059e+07	2.07352e+07	8.69738e+06	1.81047e+07	1.67806e+07	1.17319e+07	1.17508e+07	1.37427e+07	1.20764e+07	1.20745e+07	1.08016e+07	1.20027e+07
M101T88	100.988	88.1	1.5	2.70937e+06	5.88396e+06	3.59698e+06	348100	1.10262e+07	5.17565e+06	1.61037e+07	3.56547e+06	5.80877e+06	525701	5.02905e+06	5.90832e+06	3.64532e+06	744733	508838	343002	4.18913e+06	3.05882e+06	6.27342e+06	923557	586596	3.24213e+06	543338	7.43402e+06	4.38743e+06	3.48817e+06	3.50967e+06	4.47043e+06	4.38537e+06	4.25391e+06	4.38556e+06
M102T122	102.055	121.9	2	3.2089e+06	5.6895e+06	1.31569e+07	6.1812e+06	2.70469e+07	5.56565e+06	1.7641e+07	1.47388e+07	5.11357e+06	1.8302e+07	3.80492e+06	1.01991e+07	2.41225e+07	2.00003e+07	1.72668e+07	1.72646e+07	1.219e+07	2.01966e+07	1.92013e+07	7.68931e+06	9.9585e+06	4.52698e+06	7.58622e+06	1.25345e+07	1.12139e+07	4.07502e+06	1.04826e+07	1.26538e+07	1.11308e+07	1.05326e+07	1.04934e+07
M102T401	102.091	401.4	6.7	1.14556e+06	4.26342e+06	3.34406e+06	1.36281e+06	3.06322e+06	2.88686e+06	4.90618e+06	4.42055e+06	1.49533e+06	1.07314e+07	5.76162e+06	1.60959e+06	1.04866e+06	2.2329e+06	1.67556e+06	2.68805e+06	6.05767e+06	2.01061e+06	3.18014e+06	3.91682e+06	5.05778e+06	3.10097e+06	3.30142e+06	1.45335e+06	3.78796e+06	3.08817e+06	1.88708e+06	2.42623e+06	2.98575e+06	2.91884e+06	2.53746e+06
M102T65	102.127	64.6	1.1	5.83772e+07	3.84527e+07	1.08021e+08	2.25118e+08	2.74784e+07	3.90747e+07	3.31456e+07	1.23766e+08	2.72835e+07	1.05532e+08	3.2067e+07	1.25726e+08	8.66013e+07	1.35038e+08	1.26848e+08	1.29016e+08	1.4144e+08	1.23558e+08	6.55741e+07	3.15774e+07	1.44994e+08	9.33752e+07	1.32496e+08	3.165e+07	4.93651e+07	6.44834e+07	4.9007e+07	4.95286e+07	4.89383e+07	7.65402e+07	4.92927e+07
M102T691	102.033	690.8	11.5	9.2231e+06	6.50696e+06	1.36783e+07	1.52604e+07	7.29691e+06	8.7353e+06	1.28606e+07	1.15364e+07	6.87334e+06	8.35174e+06	1.29268e+07	7.01324e+06	1.77154e+07	1.40513e+07	1.06468e+07	1.01358e+07	6.76575e+06	1.60705e+07	8.24619e+06	1.10696e+07	1.39638e+07	1.11659e+07	4.28949e+06	1.85633e+07	1.02957e+07	8.3282e+06	1.09091e+07	8.34445e+06	8.32623e+06	8.12573e+06	8.88989e+06
M102T72_1	102.022	71.8	1.2	1.10072e+06	3.40682e+06	743559	951034	769606	2.75149e+07	2.42181e+06	812922	1.98223e+07	5.44876e+06	5.53468e+06	3.73694e+06	7.08991e+06	2.88165e+07	7.11289e+06	3.03518e+07	1.3462e+06	1.23384e+07	6.41695e+06	4.27834e+06	1.47473e+06	1.11992e+06	6.46077e+06	4.83792e+06	3.67009e+06	3.67122e+06	3.52353e+06	3.67266e+06	3.5207e+06	3.67337e+06	2.07883e+06
M102T72_2	102.034	72	1.2	6.99457e+06	1.0872e+07	6.0609e+06	7.95399e+06	7.87655e+06	5.91015e+06	1.2903e+07	8.42588e+06	6.57517e+06	8.99113e+06	6.98865e+06	7.38136e+06	6.49176e+06	1.01468e+07	8.55031e+06	8.51509e+06	1.22137e+07	1.05577e+07	9.08248e+06	6.94073e+06	1.05856e+07	7.93676e+06	8.18254e+06	1.01674e+07	7.34826e+06	7.58159e+06	9.63622e+06	7.42533e+06	7.43668e+06	7.93036e+06	8.59548e+06
M102T747	102.034	747.1	12.5	4.50322e+06	3.88685e+06	4.94131e+06	3.69997e+06	2.7394e+06	3.49184e+06	5.74406e+06	3.33096e+06	4.37747e+06	7.73572e+06	6.4772e+06	6.13397e+06	4.89232e+06	6.1492e+06	5.39907e+06	4.78138e+06	4.51456e+06	5.262e+06	4.32688e+06	3.20814e+06	3.23901e+06	3.43989e+06	5.80174e+06	5.96461e+06	4.85958e+06	4.98313e+06	4.89003e+06	4.88358e+06	4.75197e+06	4.53269e+06	4.75207e+06
M102T760	102.091	760	12.7	1.35824e+06	2.81636e+06	2.32926e+06	2.01949e+06	308221	1.0413e+06	343711	594293	1.50149e+06	1.73465e+06	2.16854e+06	665177	2.96348e+06	2.24996e+06	1.05335e+06	1.00219e+06	2.23833e+06	1.79363e+06	672258	3.47151e+06	1.95655e+06	5.41776e+06	2.57577e+06	414125	1.30906e+06	1.22882e+06	1.48529e+06	1.39468e+06	1.51962e+06	1.45042e+06	984285
M102T815	102.127	814.8	13.6	2.86615e+07	1.81028e+07	2.32848e+07	3.77371e+07	1.8109e+07	3.30236e+06	1.27853e+07	1.09181e+07	1.76109e+07	2.32373e+07	2.06101e+07	1.10517e+07	3.0225e+07	1.11448e+07	2.71177e+07	2.68856e+07	3.72225e+07	1.34505e+07	2.12009e+07	1.06076e+07	1.59436e+07	1.15206e+07	2.63012e+07	2.13641e+07	1.22749e+07	1.79802e+07	1.13121e+07	1.22837e+07	1.22851e+07	1.12927e+07	1.12812e+07
M102T88	102.055	88.2	1.5	2.5079e+07	2.49218e+07	9.02455e+07	2.53487e+07	2.74575e+07	2.49525e+07	2.77496e+07	8.51416e+06	2.37091e+07	1.26435e+08	8.09912e+07	3.40531e+07	1.24063e+08	1.96095e+07	9.22679e+06	3.97548e+07	2.60273e+07	2.55385e+07	4.30664e+07	2.35773e+07	2.69553e+07	1.85394e+07	5.36135e+07	8.64901e+07	6.29852e+07	3.28806e+07	4.92848e+07	5.63884e+07	5.88013e+07	4.97272e+07	5.68027e+07
M102T89	102.091	89.5	1.5	3.9296e+06	3.42342e+06	3.85139e+06	3.35441e+06	3.24606e+06	3.33966e+06	3.87129e+06	3.72594e+06	3.62426e+06	3.50173e+06	3.4951e+06	3.38878e+06	3.22764e+06	3.68223e+06	3.48112e+06	2.93758e+06	3.264e+06	3.44202e+06	3.01669e+06	3.28273e+06	3.54395e+06	3.24359e+06	2.90048e+06	3.14156e+06	3.47645e+06	3.51066e+06	3.51096e+06	3.47682e+06	3.51264e+06	3.29885e+06	3.55848e+06
M102T99	102.055	99.4	1.7	7.17443e+06	6.0809e+06	6.35792e+06	7.69726e+06	6.65652e+06	4.14856e+06	8.33497e+06	7.45043e+06	6.80463e+06	7.90333e+06	7.15191e+06	7.22239e+06	6.57613e+06	7.42862e+06	8.18168e+06	7.62737e+06	8.44624e+06	6.3309e+06	8.66548e+06	8.98066e+06	7.88536e+06	6.99261e+06	5.23963e+06	7.65406e+06	7.10294e+06	7.40439e+06	6.93034e+06	6.75501e+06	7.20619e+06	7.13416e+06	7.57329e+06
M103T103	103.039	103.3	1.7	1.09044e+06	124066	360657	708491	1.2581e+06	879820	110829	642348	1.14169e+06	1.1373e+06	634887	464236	1.26683e+06	762401	669452	560116	124987	173634	716898	1.19668e+06	722960	1.17614e+06	214025	125035	907357	836822	837210	844182	962449	943161	960281
M103T338	103.054	338.4	5.6	1.17383e+07	2.60038e+07	2.55619e+07	1.02956e+07	9.93608e+06	9.03268e+06	2.66899e+07	2.33036e+07	9.68839e+06	1.43566e+07	2.0416e+07	2.15995e+07	3.48149e+07	2.38865e+07	2.13137e+07	1.76924e+07	1.87093e+07	2.3801e+07	9.24749e+06	1.83942e+07	2.02655e+07	1.18927e+07	2.23793e+07	2.34005e+07	2.50203e+07	2.2077e+07	2.27665e+07	2.14958e+07	2.27525e+07	2.22027e+07	2.0128e+07
M103T72	102.97	72.1	1.2	3.75811e+06	3.50826e+06	3.70763e+06	2.94613e+06	3.23763e+06	3.73405e+06	3.92273e+06	4.07887e+06	1.26024e+06	974803	3.15728e+06	1.78275e+06	665157	2.30243e+06	828268	1.65092e+06	2.6741e+06	779508	2.43111e+06	6.32496e+06	2.12678e+06	2.34646e+06	1.23996e+06	2.29451e+06	2.21192e+06	2.39955e+06	2.40027e+06	2.22696e+06	2.30444e+06	2.39128e+06	2.67408e+06
M103T88	103.058	88.2	1.5	1.27873e+06	1.79138e+06	1.18084e+06	1.54696e+06	1.64779e+06	1.70334e+06	4.83393e+06	3.70073e+06	3.88468e+06	5.86846e+06	1.48825e+06	265124	2.27837e+06	855770	1.27339e+06	2.89201e+06	3.7227e+06	1.61933e+06	1.42993e+06	2.85533e+06	4.44149e+06	1.54941e+06	1.8524e+06	4.0118e+06	2.15226e+06	1.75941e+06	1.46287e+06	2.16693e+06	2.46321e+06	1.46625e+06	1.37207e+06
M103T89	103.039	89.5	1.5	1.00088e+07	2.01876e+07	5.73206e+06	2.39395e+07	8.63111e+06	6.39212e+06	6.15093e+06	5.26505e+06	7.64168e+06	6.10832e+06	8.82113e+06	6.88346e+06	9.11179e+06	4.93683e+06	6.43872e+06	6.1375e+06	1.28073e+07	9.64736e+06	1.83419e+07	9.54727e+06	8.95072e+06	7.31035e+06	9.58586e+06	9.13613e+06	8.78252e+06	8.44844e+06	8.92466e+06	8.88328e+06	8.90943e+06	8.80228e+06	8.88218e+06
M103T99	103.05	98.6	1.6	1.59496e+06	2.09186e+06	2.4852e+06	2.13548e+06	1.94515e+06	2.13392e+06	2.4466e+06	3.21e+06	1.92625e+06	1.80056e+06	2.46149e+06	2.20142e+06	612456	1.72709e+06	1.59263e+06	1.47085e+06	2.09813e+06	1.49924e+06	1.67376e+06	3.60063e+06	2.02069e+06	1.46975e+06	1.16519e+06	1.33269e+06	1.37881e+06	1.85548e+06	1.63115e+06	1.69154e+06	1.77754e+06	1.63194e+06	1.6895e+06
M104T113	104.107	113.1	1.9	1.06014e+08	5.22184e+07	1.05012e+08	8.98957e+07	1.14478e+08	1.20484e+08	9.62078e+07	9.83857e+07	5.401e+07	9.78399e+07	4.174e+07	1.15809e+08	1.03377e+08	6.96831e+07	1.14624e+08	5.86455e+07	6.78589e+07	1.03757e+08	7.74153e+07	1.04507e+08	9.11679e+07	9.00092e+07	6.71639e+07	9.74655e+07	5.93012e+07	8.84787e+07	8.90303e+07	7.89426e+07	8.8762e+07	7.724e+07	7.76369e+07
M104T122	104.053	121.7	2	7.1688e+06	8.82872e+06	6.68446e+06	8.18169e+06	5.9623e+06	5.09697e+06	6.88985e+06	4.42132e+06	8.54964e+07	2.16873e+08	1.17818e+08	6.18494e+07	8.48713e+07	1.03329e+08	9.0702e+07	8.16856e+07	6.94645e+06	8.15947e+07	5.41588e+06	6.88875e+06	7.0323e+06	5.71049e+07	3.50124e+07	8.98592e+07	2.12017e+07	3.07935e+07	3.94962e+07	3.15225e+07	3.85985e+07	3.77098e+07	3.43297e+07
M104T418	104.053	417.9	7	137919	186320	141628	199756	121445	133621	260657	237901	246744	311670	243172	262989	148146	232178	271354	143393	268141	215709	265862	207049	255241	229359	208001	280282	229560	199463	188191	205387	205378	199802	199986
M104T86	104.107	85.6	1.4	3.9607e+08	1.14059e+09	1.21045e+09	3.56659e+08	1.20832e+09	1.02186e+09	1.22955e+09	1.20357e+09	1.37122e+09	1.5142e+09	1.6595e+09	1.45917e+09	8.82461e+08	2.08916e+09	1.34183e+09	1.27466e+09	1.34219e+09	1.30468e+09	1.50368e+09	1.59087e+09	1.3649e+09	1.22964e+09	1.30358e+09	1.49168e+09	1.12638e+09	1.15968e+09	1.18686e+09	1.16305e+09	1.20063e+09	1.18973e+09	1.21103e+09
M104T89	104.07	88.8	1.5	1.45028e+08	2.11366e+08	1.55007e+08	2.02258e+08	2.04329e+08	7.55633e+07	1.45666e+08	1.23261e+08	4.9409e+07	3.68879e+07	5.77263e+07	3.94321e+07	4.56332e+07	5.94194e+07	3.39717e+07	4.0042e+07	1.30489e+08	4.54488e+07	1.37416e+08	1.53448e+08	1.27511e+08	4.02951e+07	4.48976e+07	6.84799e+07	9.98694e+07	9.98901e+07	9.8666e+07	1.01021e+08	1.05067e+08	1.02968e+08	1.00743e+08
M104T99	104.107	99.3	1.7	3.40839e+07	3.23174e+07	2.13846e+07	6.01172e+07	2.15064e+07	2.3839e+07	2.21643e+07	3.79705e+07	1.95711e+07	1.60087e+07	2.02775e+07	2.37776e+07	2.61824e+07	3.05294e+07	2.15468e+07	2.38738e+07	1.61095e+07	2.95223e+07	2.05922e+07	2.27111e+07	1.51318e+07	2.66988e+07	2.16831e+07	1.6906e+07	1.62934e+07	2.0169e+07	2.05903e+07	2.05825e+07	2.05809e+07	2.00061e+07	2.00224e+07
M105T381	105.07	380.9	6.3	1.79278e+06	1.14006e+07	1.42409e+06	1.33073e+06	1.69245e+06	1.37189e+06	1.41646e+06	1.64257e+06	485979	4.30486e+06	769728	1.1981e+06	2.80616e+06	637478	1.54662e+06	910886	1.00942e+06	644539	5.5821e+06	8.66495e+06	890014	1.09118e+06	66125.6	1.30902e+06	1.53417e+06	1.67546e+06	1.57133e+06	1.69147e+06	1.53512e+06	1.52571e+06	1.67561e+06
M105T502	105.037	501.6	8.4	54485.6	39686.1	47676.3	35644.2	61758.3	78304.3	55891.2	52385.4	29350.9	55159.5	30995.9	72499.8	56546.3	56878.7	69439.7	48205.5	29800.7	45292.5	46861.3	47028.9	50811.5	37207.6	54248.3	56518.2	55252.7	63813.5	49364.9	54636.8	54270.6	49626.6	50538.2
M105T72	105.003	71.8	1.2	3.58343e+06	2.70033e+06	2.8868e+06	3.39504e+06	3.1345e+06	3.15699e+06	4.17949e+06	3.09021e+06	4.00068e+06	3.81554e+06	3.51171e+06	4.12371e+06	3.95251e+06	4.79307e+06	4.52675e+06	4.60867e+06	3.17589e+06	4.00106e+06	4.59304e+06	3.05431e+06	3.16345e+06	3.45786e+06	3.83217e+06	3.48473e+06	3.17227e+06	3.29315e+06	3.14131e+06	3.17442e+06	3.28265e+06	3.40809e+06	3.28011e+06
M105T86	105.11	85.6	1.4	6.33069e+06	2.17484e+07	4.94949e+07	6.00318e+07	1.19159e+07	3.02419e+06	2.84288e+07	1.0194e+08	4.32785e+06	1.8135e+07	2.4207e+07	5.97197e+07	3.80097e+06	1.64697e+08	1.89221e+07	7.02334e+07	2.35948e+08	6.49575e+06	9.02691e+07	1.35777e+08	2.03362e+08	8.50197e+07	1.52292e+07	1.61086e+08	7.09979e+07	5.17981e+07	5.46593e+07	4.87362e+07	6.25685e+07	6.91515e+07	7.84022e+07
M105T89	105.074	88.8	1.5	5.88941e+06	5.07563e+06	5.51834e+06	5.50248e+06	6.34984e+06	4.97869e+06	5.68026e+06	5.07038e+06	6.62073e+06	5.35888e+06	5.99339e+06	4.56989e+06	2.96977e+06	4.56228e+06	3.51038e+06	3.63338e+06	3.99902e+06	4.7273e+06	3.729e+06	4.38768e+06	4.61205e+06	4.58431e+06	4.82836e+06	4.39512e+06	4.27523e+06	4.28332e+06	4.19719e+06	4.2821e+06	4.39955e+06	4.45806e+06	4.39803e+06
M106T116	106.05	116.4	1.9	1.92588e+06	5.34535e+06	2.80309e+06	3.07777e+06	2.67033e+06	2.94615e+06	987050	1.53901e+06	1.99725e+06	1.10987e+06	1.40396e+06	2.20198e+06	3.0764e+06	2.50301e+06	2.10985e+06	2.59402e+06	1.88993e+06	1.57513e+06	1.6829e+06	1.58019e+06	1.86445e+06	2.32421e+06	3.27445e+06	2.32753e+06	3.35777e+06	3.19001e+06	3.19108e+06	3.35794e+06	3.53596e+06	3.35386e+06	1.38111e+06
M106T468	106.086	468.1	7.8	71436.7	21502.1	9250.49	245426	47199.4	25868.2	23652.2	16692.8	149570	308865	39275.6	291894	312907	37114.5	239485	223271	147920	568605	482116	210805	172987	217329	406209	169051	291406	214813	233006	264175	289260	269555	313151
M106T73	105.963	73.2	1.2	572676	477344	548001	635472	577947	745047	544250	668215	545370	475237	581652	471735	734137	601384	589028	712950	492912	517953	894608	630257	796836	637993	645461	442454	549927	580968	577067	560741	579490	560760	591519
M106T84	106.05	84.5	1.4	6.46533e+07	7.08871e+07	6.50111e+07	8.01438e+07	6.77565e+07	5.74118e+07	7.82454e+07	7.35343e+07	1.2094e+08	1.09044e+08	1.26549e+08	1.55734e+08	1.53242e+08	7.8728e+07	1.29168e+08	1.54287e+08	6.73003e+07	1.39813e+08	9.92476e+07	7.67242e+07	7.21808e+07	7.06107e+07	1.01905e+08	1.00992e+08	6.35308e+07	5.9475e+07	6.09011e+07	7.037e+07	6.36152e+07	6.65496e+07	6.53426e+07
M106T86	106.111	85.6	1.4	2.35539e+06	946125	714402	2.9734e+06	2.44276e+06	2.27331e+06	817814	1.11038e+06	2.75692e+06	4.62242e+06	680392	1.29048e+06	1.26224e+06	996921	1.1433e+06	989749	804012	1.03007e+06	2.42633e+06	1.1197e+06	783036	4.65801e+06	1.12574e+06	893870	2.32993e+06	2.28463e+06	2.67274e+06	2.26705e+06	2.34623e+06	2.9016e+06	2.47976e+06
M107T125	107.049	125.3	2.1	1.59043e+06	399676	1.42033e+06	1.26594e+06	1.30689e+06	352192	1.44787e+06	1.61213e+06	2.30428e+06	1.71915e+06	1.8422e+06	2.05586e+06	1.49354e+06	1.13093e+06	1.56838e+06	1.07301e+06	1.78166e+06	2.07609e+06	529969	1.91722e+06	1.50476e+06	1.73255e+06	1.46762e+06	1.54224e+06	1.51216e+06	1.50364e+06	1.62745e+06	1.56602e+06	1.50554e+06	1.3272e+06	1.5719e+06
M107T338	107.049	338.4	5.6	7.16382e+06	5.14224e+06	7.54724e+06	6.76657e+06	6.37672e+06	6.98636e+06	5.67794e+06	7.33412e+06	6.21558e+06	6.94425e+06	4.2867e+06	6.61432e+06	5.92861e+06	6.93967e+06	4.44379e+06	5.9432e+06	6.13575e+06	6.66123e+06	5.27645e+06	7.26133e+06	6.45938e+06	7.4853e+06	6.10814e+06	6.56198e+06	7.32752e+06	7.07022e+06	7.17697e+06	7.34544e+06	5.47113e+06	7.32181e+06	7.20336e+06
M107T624	107.049	624.1	10.4	1.02759e+06	1.04578e+06	1.07578e+06	1.29146e+06	1.1672e+06	842383	780889	1.18429e+06	1.16577e+06	1.13939e+06	1.34723e+06	1.09076e+06	933930	1.25817e+06	1.47514e+06	1.54156e+06	1.63041e+06	1.22674e+06	947471	1.58548e+06	1.162e+06	966633	922405	987537	1.06338e+06	982739	924624	1.06379e+06	1.16264e+06	936737	1.08514e+06
M107T742	107.049	741.5	12.4	1.49624e+06	5.62211e+06	3.87735e+06	1.95265e+06	2.75693e+06	2.84767e+06	4.23853e+06	3.55498e+06	1.73908e+06	5.51771e+06	3.18159e+06	4.51672e+06	5.95479e+06	5.05669e+06	5.89432e+06	2.17109e+06	2.57671e+06	3.0749e+06	4.91226e+06	8.19598e+06	2.9779e+06	4.507e+06	1.75818e+06	4.1e+06	4.0267e+06	3.68146e+06	4.02396e+06	4.02639e+06	4.10729e+06	4.23366e+06	4.43597e+06
M107T80	106.951	80.2	1.3	6.52632e+07	4.55125e+07	3.28004e+07	2.3547e+07	4.55169e+07	1.64119e+07	6.81384e+07	6.90733e+07	3.18524e+07	3.57508e+07	4.54139e+07	3.38099e+07	2.07039e+07	1.91855e+07	7.42824e+07	3.10983e+07	3.44115e+07	3.43738e+07	4.43145e+07	8.52295e+07	3.15199e+07	3.83189e+07	3.66447e+07	3.63601e+07	2.85809e+07	3.13734e+07	3.29498e+07	3.13037e+07	2.66679e+07	3.24995e+07	3.38416e+07
M107T84	107.053	84.1	1.4	1.16627e+06	346868	706592	967009	1.36941e+06	664468	1.53567e+06	1.897e+06	846737	1.19245e+06	1.44913e+06	1.02909e+06	2.48386e+06	1.52613e+06	956110	1.00871e+06	1.39095e+06	2.56076e+06	1.71593e+06	1.8219e+06	1.75265e+06	1.33131e+06	1.17912e+06	1.32216e+06	1.29834e+06	1.26855e+06	1.42019e+06	1.02016e+06	1.41889e+06	1.39015e+06	1.31158e+06
M108T115	107.505	114.5	1.9	1.34331e+06	930684	650951	1.36619e+06	313859	63314.1	1.00481e+06	1.10516e+06	925352	1.54488e+06	1.09595e+06	476374	843587	1.66278e+06	1.43131e+06	1.37705e+06	2.06976e+06	2.91029e+06	1.66216e+06	1.38976e+06	2.30149e+06	1.16616e+06	995247	3.05776e+06	1.2295e+06	1.23185e+06	1.17361e+06	1.21522e+06	1.22913e+06	1.21541e+06	1.21566e+06
M108T86	108.011	85.8	1.4	1.68343e+07	1.17828e+07	1.69246e+07	1.23663e+07	1.14616e+07	1.30735e+07	1.65336e+07	1.39553e+07	9.04591e+06	1.55346e+07	1.57447e+07	7.42112e+06	1.68634e+07	1.39347e+07	1.53571e+07	1.63846e+07	1.52865e+07	1.74973e+07	1.67415e+07	1.61892e+07	1.51884e+07	1.37071e+07	1.43366e+07	1.83975e+07	1.36399e+07	1.26617e+07	1.52204e+07	1.28718e+07	1.4816e+07	1.43113e+07	1.47669e+07
M109T112	109.032	112.1	1.9	340569	275309	310207	193489	316149	298197	359673	239081	293551	240716	352603	305792	307172	267002	254061	255917	249654	187539	269892	285773	206859	316652	186426	221228	259912	234128	231551	329013	256842	250476	265342
M109T682	109.101	681.7	11.4	1.07908e+06	3.0492e+06	1.25067e+06	7.09067e+06	2.63833e+06	1.72418e+06	764969	581134	862842	303451	1.01008e+06	293567	561536	446469	835011	426690	1.12239e+06	889778	2.71563e+06	1.87278e+06	1.75325e+06	265874	1.97263e+06	873557	1.53872e+06	1.25954e+06	1.44213e+06	1.67202e+06	1.61457e+06	1.58655e+06	1.51974e+06
M109T723	109.065	722.7	12	311561	127031	87949	273238	68943.2	47377.1	195294	130555	311110	327929	239787	190688	102286	320300	366183	282874	135838	270231	336564	321251	141416	302168	147823	262216	303070	312118	292835	286573	312076	311360	319375
M109T744	109.101	744.2	12.4	1.82544e+06	1.14537e+06	2.819e+06	2.05203e+06	1.92336e+06	1.10579e+06	2.36914e+06	1.55452e+06	1.4863e+06	3.96311e+06	4.02773e+06	2.38453e+06	1.99764e+06	2.00855e+06	3.25747e+06	1.7585e+06	1.59286e+06	3.67856e+06	2.22983e+06	2.39869e+06	1.83566e+06	992155	1.38202e+06	4.68717e+06	2.588e+06	2.59507e+06	2.67714e+06	2.59014e+06	2.435e+06	1.46843e+06	2.40986e+06
M109T75	109.076	74.6	1.2	2.83101e+07	5.75309e+06	7.77035e+06	7.31556e+06	5.02588e+06	1.48934e+07	2.94001e+07	2.22974e+07	1.1279e+07	2.98929e+07	2.89828e+07	3.01917e+07	2.03724e+07	2.71227e+07	3.94184e+07	637717	6.59107e+06	2.20531e+07	8.13112e+06	9.40781e+06	2.57431e+07	2.47142e+07	2.50996e+07	4.07664e+07	1.42655e+07	9.10595e+06	9.09284e+06	9.0462e+06	9.09671e+06	1.0321e+07	9.20012e+06
M109T80	108.949	80.3	1.3	2.16187e+06	2.4466e+06	4.05146e+06	4.61315e+06	2.67887e+06	2.5903e+06	2.75857e+06	2.12244e+06	1.96017e+06	1.84678e+06	2.49969e+06	2.68978e+06	2.68658e+06	2.35791e+06	3.94328e+06	2.11631e+06	2.29602e+06	4.08736e+06	2.43334e+06	2.95066e+06	2.94114e+06	1.77275e+06	1.50121e+06	3.42163e+06	2.2601e+06	2.28504e+06	2.26585e+06	2.26207e+06	2.34419e+06	2.68651e+06	2.87487e+06
M109T89	109.028	88.8	1.5	3.39767e+06	3.45842e+06	3.36829e+06	2.88254e+06	3.88717e+06	3.14102e+06	3.14244e+06	3.02447e+06	3.75743e+06	3.19355e+06	3.93996e+06	2.882e+06	1.56634e+06	2.65568e+06	1.90134e+06	2.03743e+06	1.94219e+06	2.36548e+06	1.74419e+06	2.85594e+06	2.49642e+06	2.68453e+06	2.5823e+06	2.65107e+06	2.31098e+06	2.53924e+06	2.61978e+06	2.29934e+06	2.61728e+06	2.56652e+06	2.72933e+06
M110T122	110.035	121.9	2	2.69724e+06	8.4068e+06	6.24351e+06	7.11432e+06	4.35287e+06	785538	1.25185e+07	8.11327e+06	1.4635e+06	1.29969e+07	8.71592e+06	1.61011e+06	1.50354e+06	9.55679e+06	5.75233e+06	6.76819e+06	4.82967e+06	4.99779e+06	1.5195e+06	6.47112e+06	4.95702e+06	6.10057e+06	711604	1.10939e+07	3.9272e+06	4.75165e+06	4.99027e+06	4.09171e+06	4.41191e+06	4.85335e+06	4.77917e+06
M110T552	110.105	551.9	9.2	127767	446293	185148	154607	8483.99	11314	285876	473497	26586.9	8101.86	545127	373620	357913	514519	654479	369004	319260	220826	142370	326611	358295	21985.7	586675	376725	495622	499247	497000	565611	530873	590620	488931
M110T566	110.027	566.3	9.4	666461	472925	446794	356282	209581	58854	89185.9	270459	588020	237373	997018	483768	396669	1.25873e+06	1.02845e+06	386507	234123	137601	801483	359895	283360	684285	113224	1.25056e+06	479045	514509	509783	259282	390115	511694	510223
M110T67	110.021	66.9	1.1	1.32269e+07	1.34207e+07	1.23731e+07	1.34599e+07	1.28231e+07	1.40832e+07	1.38365e+07	1.35121e+07	1.40534e+07	1.38626e+07	1.2664e+07	1.31305e+07	1.38612e+07	1.34477e+07	1.38495e+07	1.30844e+07	1.34766e+07	1.34792e+07	1.38104e+07	1.3202e+07	1.40209e+07	1.33737e+07	1.31878e+07	1.32285e+07	1.34063e+07	1.31577e+07	1.36787e+07	1.24011e+07	1.35579e+07	1.35089e+07	1.3561e+07
M110T68	109.597	68.1	1.1	254650	221249	199388	203104	201736	219868	623477	530462	215636	109884	136306	503619	370202	73776.7	828284	150368	751773	601126	153469	1.5016e+06	55787.5	659400	175438	91377.6	572759	304325	299602	297936	320398	328339	360271
M110T72	110.009	71.7	1.2	9.97611e+07	2.28201e+08	2.3418e+08	2.68058e+08	8.57862e+07	1.48252e+08	2.89435e+08	2.71349e+08	2.61764e+08	1.97608e+08	1.55704e+08	1.23763e+08	2.59571e+08	2.47375e+08	5.14556e+07	3.1732e+08	3.51101e+08	3.50935e+08	1.71779e+08	2.88766e+08	1.40517e+08	2.60119e+08	1.15431e+08	1.08034e+08	2.58373e+08	1.51633e+08	2.57747e+08	2.64618e+08	3.16224e+08	2.83779e+08	2.48763e+08
M110T73	109.979	72.9	1.2	958572	2.47715e+06	535067	1.22194e+06	1.66978e+06	191979	846197	1.41563e+06	2.32158e+06	2.49938e+06	745641	2.5515e+06	630040	3.13928e+06	2.14692e+06	2.22935e+06	648750	2.67546e+06	1.13436e+06	1.93131e+06	2.42115e+06	517736	896749	1.55764e+06	1.07051e+06	1.38564e+06	2.23193e+06	1.52387e+06	1.5698e+06	1.55704e+06	1.42992e+06
M110T797	110.02	797.4	13.3	9.074e+08	1.08438e+09	9.37718e+08	1.37743e+09	8.99922e+08	1.26216e+09	9.89171e+08	7.93143e+08	7.08411e+08	9.69384e+08	1.2738e+09	1.51292e+09	3.25067e+08	6.74344e+08	1.14136e+09	7.69629e+08	1.22269e+09	4.04517e+08	1.2562e+09	8.10033e+08	5.70118e+08	1.44901e+09	6.59377e+08	2.57109e+09	7.2921e+08	6.63856e+08	9.10669e+08	6.53845e+08	7.25774e+08	6.58975e+08	7.36206e+08
M110T811	110.02	811.1	13.5	1.12771e+08	1.43936e+08	1.39991e+08	1.05188e+08	2.8884e+08	4.60889e+08	1.16552e+08	5.66407e+07	1.37873e+08	7.89371e+07	8.05272e+07	2.30927e+08	1.40677e+08	7.07407e+07	8.85744e+07	1.08835e+08	3.21771e+07	2.42955e+07	6.61953e+07	6.76041e+07	4.1019e+07	1.13333e+08	1.32666e+08	1.44024e+07	5.27369e+07	9.74286e+07	9.74664e+07	1.19162e+08	9.75339e+07	1.02111e+08	9.74988e+07
M110T86	110.027	85.6	1.4	2.1947e+07	4.91821e+07	2.90231e+07	3.75953e+07	3.10095e+07	1.60445e+07	2.31207e+07	2.4283e+07	2.44756e+06	1.98717e+07	1.54291e+07	1.69433e+07	6.99014e+06	3.43883e+07	1.59421e+07	1.24386e+07	3.67661e+07	1.20467e+07	3.19575e+07	3.02185e+07	4.29593e+07	3.83017e+07	2.98439e+07	3.642e+07	2.49807e+07	2.36131e+07	2.25828e+07	2.52747e+07	2.82945e+07	2.80359e+07	2.91305e+07
M111T104	111.044	104.3	1.7	3.09446e+06	2.6349e+06	1.93927e+06	3.21534e+06	3.99124e+06	3.11309e+06	2.29981e+06	2.69639e+06	3.25857e+06	3.44633e+06	2.42332e+06	2.42598e+06	3.45857e+06	2.54394e+06	2.93876e+06	2.93956e+06	1.9272e+06	1.88759e+06	3.18653e+06	3.24463e+06	2.42974e+06	2.94645e+06	2.84524e+06	1.99966e+06	3.06584e+06	2.92616e+06	2.93128e+06	3.23154e+06	3.3633e+06	3.12131e+06	3.71958e+06
M111T481	111.117	480.7	8	8.19967e+06	7.34231e+06	8.83821e+06	7.97249e+06	1.43532e+07	7.31804e+06	1.87054e+07	1.10966e+07	1.71812e+07	1.03791e+07	8.2278e+06	1.61349e+07	1.20241e+07	1.13584e+07	1.25375e+07	1.29908e+07	1.81251e+07	1.38588e+07	2.04732e+07	1.18147e+07	6.66242e+06	1.77434e+07	1.32843e+07	2.19152e+07	1.07746e+07	1.06888e+07	1.18322e+07	1.10584e+07	1.17981e+07	7.91006e+06	1.16681e+07
M111T629	111.044	628.7	10.5	1.18507e+06	698503	2.03566e+06	676623	702311	1.54745e+06	789717	1.59861e+06	95424.9	3.01454e+06	2.36936e+06	1.13881e+06	888945	947286	863899	745041	1.46237e+06	1.20757e+06	706319	1.12121e+06	718301	582263	1.249e+06	1.15246e+06	388463	785821	776612	1.13122e+06	907432	857146	786573
M111T64	111.117	63.8	1.1	2.20573e+06	3.26517e+06	2.60735e+06	2.3235e+06	3.77891e+06	4.31682e+06	1.81689e+06	2.87968e+06	2.8165e+06	8.18124e+06	4.1407e+06	2.56392e+07	7.81236e+06	9.27638e+06	6.69032e+06	3.06369e+06	1.08879e+06	2.35586e+07	1.98491e+06	1.5682e+07	1.07193e+07	1.36012e+06	8.14234e+06	6.89685e+06	7.23184e+06	5.10426e+06	4.96777e+06	4.69548e+06	5.92336e+06	6.65381e+06	7.61466e+06
M111T72	111.01	71.7	1.2	2.71348e+07	1.66276e+07	2.98536e+07	1.6768e+07	3.16272e+07	3.0581e+07	1.6233e+07	2.19673e+07	9.96629e+06	8.65665e+06	6.26662e+06	2.82342e+07	2.73231e+07	1.36437e+07	2.62182e+07	2.61245e+07	2.90422e+07	2.49651e+07	2.58429e+07	1.66287e+07	2.72777e+07	1.34568e+07	3.0903e+07	2.53841e+07	3.29275e+07	3.32611e+07	3.43682e+07	3.55724e+07	3.80305e+07	3.52751e+07	2.92889e+07
M111T801	111.019	801.1	13.4	8.6497e+08	8.46161e+08	1.2753e+09	1.02916e+09	1.68819e+09	1.36558e+09	1.03011e+09	1.82602e+09	2.0755e+09	2.66282e+09	2.17101e+09	2.73175e+09	2.05346e+09	1.30562e+09	1.9662e+09	2.00151e+09	1.38298e+09	3.40833e+09	1.17496e+09	1.47046e+09	1.27907e+09	1.46918e+09	1.89712e+09	3.48469e+09	1.84395e+09	1.83891e+09	1.88391e+09	1.70129e+09	1.93769e+09	1.66786e+09	1.69607e+09
M111T818	111.117	817.6	13.6	5.26991e+06	2.12369e+06	5.76291e+06	5.23869e+06	4.2723e+06	4.53815e+06	4.07594e+06	4.97014e+06	3.71572e+06	5.83658e+06	2.76755e+06	2.62993e+06	2.53221e+06	4.33685e+06	5.59926e+06	5.11939e+06	4.76721e+06	9.54637e+06	8.04317e+06	7.31823e+06	4.72293e+06	5.50268e+06	8.30682e+06	3.70246e+06	5.1048e+06	4.90844e+06	2.62153e+06	4.63796e+06	5.09071e+06	5.08673e+06	5.09461e+06
M112T104	112.076	103.6	1.7	1.90984e+06	1.56036e+06	1.36443e+06	1.92648e+06	969300	786564	1.74151e+06	1.84418e+06	1.65252e+06	1.73056e+06	1.40219e+06	1.15432e+06	1.53161e+06	2.15946e+06	2.13524e+06	1.98757e+06	2.53936e+06	2.34275e+06	2.18347e+06	2.16546e+06	2.50838e+06	1.85708e+06	1.79988e+06	2.88145e+06	1.87944e+06	1.89933e+06	1.86405e+06	1.87213e+06	1.92401e+06	1.87813e+06	1.8727e+06
M112T110	112.039	110.4	1.8	2.47891e+06	667823	479891	2.58575e+06	1.32571e+06	1.52851e+06	614379	325947	1.37641e+06	1.36632e+06	375067	445245	510253	346138	418020	322227	330339	354967	1.29409e+06	359391	335781	1.94965e+06	428028	450844	1.32724e+06	1.21892e+06	1.36782e+06	1.32401e+06	1.40066e+06	1.39007e+06	1.38917e+06
M112T118	112.05	118.1	2	6.63559e+08	1.02934e+08	3.92143e+08	4.44759e+08	9.50595e+08	3.24892e+08	3.27082e+08	6.73111e+08	3.57349e+08	4.63842e+08	2.18423e+08	4.25667e+08	1.37802e+08	3.45922e+08	3.58028e+08	4.29379e+08	7.32035e+08	1.46847e+08	3.47573e+08	1.39225e+08	9.47532e+08	5.76437e+08	1.93782e+08	4.95539e+08	4.44267e+08	1.84937e+08	3.97562e+08	2.77545e+08	4.24461e+08	4.07727e+08	4.2309e+08
M112T423	112.05	422.8	7	209567	834199	642804	290686	1.13086e+06	727073	1.14222e+06	788626	984518	1.50664e+06	1.51753e+06	737380	457598	455617	968349	513049	976755	797221	533798	1.13752e+06	689566	646242	476985	3.46008e+06	770388	831607	728185	777294	810054	854979	941690
M112T481	112.12	480.8	8	224386	704567	499101	503947	1.1256e+06	784094	1.50126e+06	1.44566e+06	380735	293691	520301	646489	582122	474342	309731	289564	402221	951346	773242	3.775e+06	1.3537e+06	1.03364e+06	169425	193532	836268	415805	1.04217e+06	780866	779334	810925	841628
M112T67	112.112	66.7	1.1	1.0356e+06	825613	1.01844e+06	725000	969807	650237	794727	739384	903231	823465	1.19276e+06	921101	876774	789348	833373	756252	953573	762609	1.03911e+06	982324	869548	826715	754118	952544	812620	774258	800820	884264	812223	822660	800927
M112T73	112.087	73.1	1.2	4.82679e+07	3.48855e+06	1.48366e+07	1.10699e+07	1.39822e+07	2.93721e+07	1.85978e+07	3.61199e+07	2.76345e+07	9.04417e+07	1.34725e+07	1.1128e+07	2.19081e+07	5.05342e+07	1.48535e+07	2.01298e+07	2.61612e+07	1.30961e+07	1.18057e+07	1.30966e+07	5.4263e+07	1.40633e+07	3.04331e+07	3.84618e+07	1.43688e+07	2.27026e+07	1.02494e+07	2.2727e+07	2.13439e+07	2.6793e+07	1.77409e+07
M112T801	112.019	801.2	13.4	5.29169e+08	4.12117e+08	8.20672e+08	5.19852e+08	1.02003e+09	8.27482e+08	7.2572e+08	8.84804e+08	6.37818e+08	7.71427e+08	5.88848e+08	7.84717e+08	6.14373e+08	9.24793e+08	5.59919e+08	6.20911e+08	3.81308e+08	1.02537e+09	3.27858e+08	3.89214e+08	7.5368e+08	8.74198e+08	9.08185e+08	9.77379e+08	5.48432e+08	6.13938e+08	7.98125e+08	5.7378e+08	6.11984e+08	4.46396e+08	6.71798e+08
M112T802	111.52	802.4	13.4	4.59842e+07	1.9722e+07	4.94396e+07	1.69385e+07	4.7226e+07	2.04255e+07	2.15021e+07	2.25356e+07	4.61553e+07	3.24964e+07	2.03261e+07	1.86475e+07	1.64767e+07	2.19978e+07	3.95114e+07	1.85748e+07	5.05035e+07	4.3888e+07	3.69864e+07	2.00105e+07	2.16286e+07	3.27996e+07	3.0871e+07	2.30713e+07	2.02675e+07	2.16096e+07	2.02802e+07	2.15591e+07	2.11709e+07	2.0136e+07	2.77637e+07
M112T814	111.522	814	13.6	1.99016e+07	1.15377e+07	2.25112e+07	2.15806e+07	1.62963e+07	1.97285e+07	3.28837e+07	2.6956e+07	4.68177e+07	3.89762e+07	5.86592e+07	1.14172e+08	5.72665e+07	7.89759e+07	5.17638e+07	3.01909e+07	6.78012e+07	8.27652e+07	2.31599e+07	3.45881e+07	2.42243e+07	6.42764e+07	5.91012e+07	5.23313e+07	3.15005e+07	5.8092e+07	4.64129e+07	4.54181e+07	3.07997e+07	5.53584e+07	3.2841e+07
M112T99	112.05	99.2	1.7	7.30413e+06	7.59453e+06	7.37746e+06	6.93512e+06	7.35691e+06	7.66192e+06	7.60987e+06	6.56687e+06	7.28501e+06	7.22522e+06	7.56105e+06	7.16607e+06	7.44717e+06	6.73005e+06	7.62955e+06	7.33112e+06	7.11245e+06	8.34818e+06	8.86752e+06	7.60974e+06	6.93219e+06	7.7205e+06	7.03563e+06	7.39203e+06	7.24651e+06	7.45501e+06	6.70301e+06	6.75122e+06	7.11767e+06	7.11352e+06	7.46375e+06
M113T115	113.071	114.7	1.9	1.68629e+06	1.98605e+06	1.82331e+06	1.9977e+06	2.66352e+06	2.62273e+06	4.5666e+06	3.78288e+06	1.26633e+06	2.43923e+06	752796	2.02009e+06	5.3901e+06	1.88137e+06	1.06353e+06	1.33489e+06	135441	1.18835e+06	212116	826941	1.00252e+06	179395	94429.4	609987	1.81614e+06	1.74828e+06	1.72586e+06	1.72946e+06	1.80192e+06	1.80759e+06	1.80145e+06
M113T118	113.054	118	2	4.62949e+07	2.12564e+07	3.17115e+07	5.21826e+06	3.27348e+07	2.24048e+07	4.27017e+07	3.50309e+07	3.66113e+07	3.83192e+06	4.24116e+07	4.71283e+06	2.9227e+06	2.91902e+06	3.28434e+06	3.63843e+06	2.53688e+06	1.76374e+06	1.97973e+06	5.11254e+06	1.73388e+07	2.76004e+07	1.83531e+06	2.43528e+07	1.63138e+07	1.98981e+07	1.51751e+07	5.73724e+06	1.75424e+07	1.75602e+07	1.75993e+07
M113T122	113.035	122.2	2	1.14757e+08	3.5952e+08	1.28278e+08	1.55228e+08	1.34032e+08	1.18623e+07	3.06021e+08	3.85872e+07	2.76266e+08	6.77133e+07	1.91236e+08	1.17202e+08	1.38318e+08	4.47461e+07	5.83047e+07	2.30118e+08	1.43671e+08	1.95994e+08	5.65923e+07	1.366e+08	1.12546e+08	7.51704e+07	6.20751e+07	9.62233e+07	6.79952e+07	5.63358e+07	5.65437e+07	1.00269e+08	7.26019e+07	5.74878e+07	5.78777e+07
M113T174	113.035	173.9	2.9	1.65429e+07	2.8859e+07	3.30206e+07	1.60362e+07	2.82037e+07	2.79468e+07	3.28585e+07	3.04006e+07	2.84316e+07	3.60716e+07	2.07951e+07	3.57391e+07	2.97679e+07	3.86659e+07	3.03114e+07	1.67621e+07	3.14442e+07	4.17407e+07	3.76822e+07	3.90803e+07	3.6989e+07	2.6839e+07	3.03109e+07	2.79136e+07	2.87047e+07	3.08035e+07	1.59669e+07	3.06964e+07	3.28998e+07	2.88174e+07	3.05336e+07
M113T315	113.029	314.8	5.2	3.78598e+07	1.06e+07	1.95614e+07	1.40254e+07	8.97715e+06	4.05795e+06	1.10221e+07	2.15451e+07	1.47267e+07	1.54144e+07	1.08053e+07	1.16051e+07	1.26507e+07	1.61252e+07	1.40674e+07	1.00192e+07	1.02348e+07	1.0407e+07	2.34662e+07	1.17242e+07	1.06247e+07	2.27902e+07	1.1185e+07	1.30103e+07	9.68516e+06	8.84484e+06	8.94819e+06	1.16386e+07	9.88598e+06	9.09396e+06	9.92722e+06
M113T449	113.096	448.7	7.5	868146	1.0027e+06	560412	1.39514e+06	533550	728056	1.78179e+06	1.19951e+06	1.22741e+06	1.60212e+06	720925	1.28721e+06	2.52092e+06	464787	880124	1.54655e+06	1.0017e+06	860117	804832	787700	2.79257e+06	1.31597e+06	1.37684e+06	764891	1.05853e+06	1.01345e+06	1.49073e+06	1.39181e+06	1.395e+06	1.32018e+06	980435
M113T72	113.01	71.8	1.2	1.47743e+06	1.11271e+06	1.27043e+06	996746	1.35064e+06	1.04486e+06	1.18956e+06	998392	1.1214e+06	980652	1.31594e+06	1.10132e+06	1.36398e+06	900711	994977	1.00376e+06	1.10122e+06	1.04659e+06	1.26576e+06	1.20428e+06	1.03989e+06	1.13182e+06	928747	1.1057e+06	1.0544e+06	1.09456e+06	1.08537e+06	1.09442e+06	1.10289e+06	1.07172e+06	1.09435e+06
M113T724	113.06	723.8	12.1	496411	747757	811950	741300	1.40658e+06	1.87794e+06	1.03682e+06	886487	907426	733474	902956	869819	911764	608780	845674	794646	379642	345010	343240	357377	411381	333779	775555	167257	568437	601216	568670	512918	603532	667189	567377
M113T73	113.09	73.1	1.2	87287.7	1.03194e+06	1.15028e+06	327838	680867	98878	424530	594687	1.2086e+06	325075	1.24154e+06	1.27472e+06	1.0755e+06	113476	1.10645e+06	313165	825446	389657	1.17858e+06	1.63335e+06	1.39841e+06	890764	875345	1.29277e+06	1.02099e+06	528561	1.07081e+06	899459	938433	1.01581e+06	1.01622e+06
M113T776	113.06	775.8	12.9	4.25922e+06	3.57716e+06	7.36018e+06	5.75162e+06	7.02137e+06	3.63682e+06	4.35115e+06	5.75191e+06	5.74904e+06	1.00739e+07	5.73242e+06	9.17713e+06	5.52158e+06	5.56284e+06	5.41272e+06	5.66659e+06	4.02298e+06	5.293e+06	8.65314e+06	3.56327e+06	4.0441e+06	5.63105e+06	7.33517e+06	1.12116e+07	4.38098e+06	4.88083e+06	6.38513e+06	4.56603e+06	4.54603e+06	5.17491e+06	4.58498e+06
M113T787	113.06	786.6	13.1	4.74718e+06	3.57721e+06	3.5825e+06	4.73575e+06	4.85371e+06	1.69099e+06	3.32306e+06	4.52624e+06	3.38207e+06	7.53914e+06	6.5305e+06	7.30808e+06	7.09017e+06	4.2258e+06	5.69173e+06	4.98673e+06	4.45896e+06	3.90884e+06	2.48825e+06	3.29004e+06	2.90222e+06	4.27807e+06	4.40141e+06	4.05508e+06	3.12455e+06	3.65468e+06	3.11742e+06	3.13349e+06	3.12432e+06	3.12637e+06	3.70624e+06
M113T83	112.896	82.9	1.4	206558	1.16899e+07	9.0002e+06	171017	80013	291595	1.06815e+07	6.33957e+06	165603	94759	7.614e+06	7.92652e+06	9.97735e+06	7.29639e+06	4.52646e+06	5.14167e+06	8.13805e+06	8.82119e+06	187997	7.58794e+06	211957	85323.4	6.35608e+06	8.1713e+06	5.97692e+06	6.38126e+06	1.94056e+06	6.98053e+06	5.99321e+06	6.40249e+06	6.38821e+06
M113T89_1	113	89.1	1.5	9.34604e+07	8.31903e+07	1.50407e+08	9.0606e+07	1.31584e+08	1.47071e+08	2.04664e+08	1.16909e+08	3.02175e+07	3.48548e+07	4.25657e+07	3.99792e+07	1.93698e+07	3.162e+07	3.01253e+07	2.74169e+07	4.61328e+07	1.95194e+07	4.4146e+07	6.51128e+07	5.19434e+07	3.75136e+07	2.70724e+07	4.05628e+07	3.72828e+07	3.72395e+07	3.22981e+07	3.86122e+07	3.85188e+07	3.72864e+07	4.34509e+07
M113T89_2	113.071	89	1.5	4.19079e+06	1.89015e+06	1.46501e+06	3.06195e+06	1.82652e+06	2.72678e+06	2.27598e+06	2.17435e+06	2.34351e+06	2.90814e+06	3.09407e+06	2.2226e+06	4.53768e+06	4.17246e+06	3.33848e+06	2.60589e+06	2.21791e+06	1.90591e+06	2.46147e+06	2.46873e+06	1.74909e+06	2.77476e+06	2.80424e+06	1.92185e+06	2.39989e+06	2.39697e+06	3.34987e+06	2.42664e+06	2.40119e+06	2.46406e+06	2.39998e+06
M114T108	114.091	107.6	1.8	2.15238e+06	6.78869e+06	4.46009e+06	4.57558e+06	7.83569e+06	2.82267e+06	5.42427e+06	3.73791e+06	5.7515e+06	3.9722e+06	6.32343e+06	4.42761e+06	8.88628e+06	6.10511e+06	6.29313e+06	4.65819e+06	9.34093e+06	1.11277e+07	1.72073e+07	1.06488e+07	6.14056e+06	5.03913e+06	5.59411e+06	7.4456e+06	4.9069e+06	6.35506e+06	6.19908e+06	6.35362e+06	6.35713e+06	6.35357e+06	6.02684e+06
M114T121	114.055	121.4	2	1.79172e+06	1.21752e+06	1.90346e+06	544502	1.98473e+06	1.83593e+06	7.13553e+06	1.23881e+06	1.12165e+07	1.01325e+07	4.20746e+06	1.47917e+07	9.49249e+06	1.55137e+07	4.42771e+06	1.17852e+07	1.50628e+07	1.80527e+07	1.15026e+07	3.24471e+06	4.77386e+06	1.25464e+07	1.53154e+07	1.04971e+07	1.21748e+07	1.21899e+07	1.16246e+07	5.3968e+06	1.10321e+07	1.21021e+07	1.13763e+07
M114T130	114.065	129.9	2.2	1.91272e+08	1.36746e+08	2.41746e+08	1.79261e+08	1.85633e+08	2.08882e+08	2.82769e+08	2.00077e+08	4.45158e+06	8.22846e+06	4.03463e+07	2.37045e+07	1.84641e+07	5.08182e+06	6.90384e+06	2.46555e+07	6.28401e+07	7.95791e+06	4.64009e+07	8.22264e+06	9.33449e+06	2.81616e+07	3.98945e+07	6.9464e+06	8.34716e+07	8.50455e+07	8.50357e+07	8.35433e+07	9.26708e+07	8.50393e+07	7.78418e+07
M114T143	114.065	143.4	2.4	3.69673e+07	4.9473e+07	3.77804e+07	8.25294e+07	3.83375e+07	3.7998e+07	5.16578e+07	5.64584e+07	5.54196e+07	6.08502e+07	6.4869e+07	5.74754e+07	8.90784e+07	6.89375e+07	7.30261e+07	7.65873e+07	7.02442e+07	7.13614e+07	1.10938e+08	7.65577e+07	7.47134e+07	6.1264e+07	6.60145e+07	6.8979e+07	5.91158e+07	5.76427e+07	4.80296e+07	5.76907e+07	5.89226e+07	5.89449e+07	5.77065e+07
M114T156	114.065	156.5	2.6	9.56484e+06	8.70114e+06	1.43978e+07	1.07692e+07	1.40522e+07	1.47045e+07	1.16272e+07	6.42781e+06	8.3145e+06	1.09795e+07	1.28337e+07	1.09885e+07	1.40534e+07	9.233e+06	1.41488e+07	1.59577e+07	1.04526e+07	809291	1.68007e+07	1.15912e+07	1.42941e+07	9.51528e+06	1.04255e+07	9.5156e+06	1.33989e+07	1.15839e+07	1.32048e+07	1.32078e+07	1.33962e+07	1.37705e+07	1.32106e+07
M114T165	114.065	164.7	2.7	4.8904e+07	2.73524e+07	3.72878e+07	4.34419e+07	4.06565e+07	2.72624e+07	3.34908e+07	2.93846e+07	3.42942e+07	5.94144e+07	4.66634e+07	3.96752e+07	3.30343e+07	5.23252e+07	4.59443e+07	3.98903e+07	4.3998e+07	4.61187e+07	3.91682e+07	4.30311e+07	4.47083e+07	4.72984e+07	5.24321e+07	4.93398e+07	4.26815e+07	4.23981e+07	4.46075e+07	4.24667e+07	4.25192e+07	4.50627e+07	4.24501e+07
M114T174	114.038	173.9	2.9	1.92971e+06	3.31277e+06	3.54225e+06	1.69243e+06	2.95514e+06	2.99867e+06	3.04528e+06	3.65568e+06	3.83395e+06	3.87266e+06	4.43635e+06	3.86618e+06	2.77883e+06	4.24278e+06	3.45831e+06	3.24169e+06	4.48622e+06	3.12242e+06	4.56742e+06	5.08552e+06	4.23741e+06	4.88568e+06	3.15655e+06	4.08612e+06	4.09348e+06	3.98665e+06	4.58168e+06	3.55535e+06	3.98754e+06	4.0931e+06	4.08837e+06
M114T194	114.065	193.7	3.2	3.17003e+07	5.75928e+07	3.07547e+07	6.38639e+07	3.02069e+07	8.14082e+07	3.32019e+07	5.02222e+07	1.08025e+08	1.03561e+08	6.48626e+07	8.28767e+07	1.21113e+08	1.15308e+08	7.36979e+07	9.51411e+07	6.27037e+07	1.69929e+08	8.28278e+07	4.78591e+07	8.18677e+07	8.14602e+07	1.35336e+08	1.12614e+08	6.82997e+07	6.83268e+07	6.93096e+07	6.82739e+07	6.99794e+07	6.83785e+07	7.20462e+07
M114T208	114.065	208.3	3.5	6.78024e+06	7.23991e+06	1.1959e+07	8.90962e+06	8.2093e+06	8.60035e+06	8.11648e+06	8.27875e+06	2.80557e+07	3.62443e+07	3.33107e+07	3.49406e+07	3.82546e+07	3.50975e+07	4.06629e+07	3.70911e+07	9.66386e+06	3.65943e+07	1.44764e+07	9.20317e+06	1.41613e+07	2.38579e+07	2.67044e+07	3.92037e+07	2.06392e+07	2.05699e+07	2.05875e+07	2.15169e+07	1.84153e+07	1.99366e+07	1.99472e+07
M114T232	114.065	232.4	3.9	3.60581e+07	2.12688e+07	3.04374e+07	2.95002e+07	3.57454e+07	2.89498e+07	2.50449e+07	3.103e+07	2.17607e+07	2.49301e+07	2.46331e+07	2.97709e+07	2.82772e+07	3.17746e+07	2.85455e+07	2.64595e+07	2.62093e+07	2.44176e+07	2.09765e+07	3.34571e+07	3.00337e+07	3.23184e+07	2.82681e+07	2.56549e+07	3.41572e+07	3.19428e+07	3.25523e+07	2.2924e+07	3.35606e+07	2.83101e+07	3.03947e+07
M114T249	114.065	249.1	4.2	2.95057e+07	483340	188371	4.12044e+07	3.98036e+07	3.56008e+07	133371	91430.9	4.06061e+07	3.29985e+07	596210	107096	544505	780095	1.13246e+06	975994	416770	348879	4.32211e+07	329181	821950	3.46501e+07	85284.7	891626	1.66978e+07	1.67505e+07	1.72855e+07	1.86507e+07	1.7265e+07	1.67092e+07	1.59562e+07
M114T315	114.037	314.7	5.2	2.27132e+06	851725	2.25985e+06	2.28076e+06	1.43813e+06	3.68125e+06	1.91744e+06	3.79254e+06	580952	2.18516e+06	902585	291929	467969	636540	882207	569157	850288	695318	988195	2.59478e+06	1.66857e+06	2.03933e+06	790313	2.48947e+06	837044	1.41465e+06	1.04509e+06	874380	855278	1.03773e+06	1.10742e+06
M114T338	114.065	338.2	5.6	4.35211e+06	3.83599e+06	5.11435e+06	3.47687e+06	1.18858e+06	2.3112e+07	7.32886e+06	4.44729e+06	2.93562e+08	4.55387e+08	3.15652e+08	2.90288e+08	3.38632e+08	3.04082e+08	3.71873e+08	3.41057e+08	2.20403e+06	2.22836e+08	3.48141e+06	2.85538e+06	4.74711e+06	1.94343e+08	1.68817e+08	2.10716e+08	1.12458e+08	1.35958e+08	1.30658e+08	1.30805e+08	1.3711e+08	1.1806e+08	1.35403e+08
M114T342	114.128	342.4	5.7	6.3932e+06	2.04853e+07	1.54861e+07	1.56686e+07	4.79514e+06	1.81457e+07	2.52357e+07	2.61556e+07	2.44344e+07	1.81513e+07	1.60453e+07	1.84562e+07	2.2463e+07	1.89206e+07	1.96592e+07	1.80779e+07	2.09061e+07	2.53536e+07	1.62413e+07	9.07417e+06	1.68146e+07	5.6101e+06	6.4e+06	6.19953e+06	4.54351e+06	4.573e+06	4.57258e+06	4.74604e+06	4.57306e+06	4.62233e+06	4.69817e+06
M114T35	113.963	34.8	0.6	5.45708e+07	3.29901e+07	4.12746e+07	3.2771e+07	3.53224e+07	3.36073e+07	4.44243e+07	3.19003e+07	8.20201e+07	3.34132e+07	4.6043e+07	3.337e+07	3.33212e+07	2.99242e+07	3.00822e+07	3.34949e+07	3.02134e+07	3.6847e+07	5.12309e+07	4.17714e+07	3.32605e+07	3.74434e+07	3.09657e+07	8.66532e+07	3.08136e+07	3.37502e+07	3.02105e+07	3.47473e+07	3.44533e+07	3.56969e+07	3.41427e+07
M114T384	114.065	384.1	6.4	5.78908e+07	5.70442e+07	4.64253e+07	4.26217e+07	8.14216e+07	5.66271e+07	7.05283e+07	6.55463e+07	5.41284e+07	5.60164e+07	5.19063e+07	5.66497e+07	6.74384e+07	3.13638e+07	7.14668e+07	6.89375e+07	9.22835e+07	5.91087e+07	8.98233e+07	7.54676e+07	6.39171e+07	4.45585e+07	3.74626e+07	5.1911e+07	5.69823e+07	5.86327e+07	5.70368e+07	5.98257e+07	5.70362e+07	5.70461e+07	6.73673e+07
M114T402	114.065	402.4	6.7	4.70678e+07	3.05066e+07	2.36993e+07	6.94055e+07	4.22676e+07	3.52902e+07	1.38181e+07	1.83378e+07	7.15565e+07	3.77765e+07	2.73578e+07	2.23604e+07	1.94338e+07	1.23105e+07	1.59094e+07	1.41907e+07	1.82061e+07	1.52326e+07	3.23694e+07	1.3632e+07	1.34548e+07	4.63095e+07	1.94427e+07	1.8239e+07	3.28412e+07	4.19821e+07	4.10283e+07	4.19976e+07	4.23812e+07	4.19868e+07	4.10216e+07
M114T419	114.092	418.6	7	4.25677e+07	1.6453e+07	2.94037e+07	4.08453e+07	1.22579e+07	2.03629e+07	1.7663e+07	2.81787e+07	1.19545e+07	2.16557e+07	1.5167e+07	2.65397e+07	5.91594e+07	2.16824e+07	5.33261e+07	3.05156e+07	3.12665e+07	1.14337e+07	3.88322e+07	3.53829e+07	5.05057e+07	4.44516e+07	4.21655e+07	2.76139e+07	1.5333e+07	1.69764e+07	1.85282e+07	2.61919e+07	2.31785e+07	2.31944e+07	2.42792e+07
M114T427	114.065	427	7.1	6.50148e+07	3.08611e+07	2.2405e+07	9.60298e+07	2.54113e+07	1.72382e+07	3.04667e+07	3.72811e+07	3.17187e+07	2.24808e+07	4.53763e+07	4.59028e+07	3.88371e+07	2.16059e+07	3.3204e+07	1.57076e+07	7.88649e+07	5.16488e+07	1.0037e+08	2.73656e+07	3.09423e+07	4.07348e+07	4.13666e+07	4.09177e+07	3.34221e+07	3.42072e+07	3.35697e+07	3.95905e+07	2.66547e+07	3.5144e+07	3.33774e+07
M114T442	114.065	442	7.4	1.89347e+07	100959	1.63953e+07	1.35836e+07	1.2135e+07	1.49024e+07	1.26196e+07	7.13803e+06	1.98695e+07	1.87246e+07	1.49633e+07	1.63213e+07	9.96847e+06	1.31845e+07	1.50672e+07	1.79926e+07	1.32876e+07	7.54977e+06	1.57235e+07	1.67499e+07	1.51091e+07	1.51245e+07	4.98546e+06	1.33463e+07	1.47089e+07	1.33674e+07	1.36121e+07	1.31266e+07	1.32074e+07	1.28577e+07	1.52225e+07
M114T463	114.128	463.4	7.7	1.01149e+06	529683	597842	373449	1.15635e+06	1.65717e+06	1.07654e+06	882322	379611	1.2612e+06	1.01152e+06	898793	939895	802510	677270	740815	454009	926617	1.24576e+06	1.04721e+06	131469	2.85027e+06	1.14799e+06	1.08985e+06	1.25721e+06	1.16213e+06	652538	1.08351e+06	835343	1.07829e+06	1.16048e+06
M114T473	114.065	472.6	7.9	4.11962e+07	3.80585e+07	3.43838e+07	3.17951e+07	4.48679e+06	4.41116e+07	1.50912e+08	1.44261e+08	2.16792e+08	2.05093e+07	1.94164e+08	2.24114e+08	1.74726e+08	1.94333e+08	9.26617e+07	8.88287e+06	1.54199e+08	3.74244e+07	1.284e+08	4.94278e+07	3.47619e+07	5.95973e+07	5.11821e+07	1.22163e+08	6.01767e+07	8.96049e+07	4.3966e+07	8.74495e+07	6.01275e+07	7.87039e+07	1.08397e+08
M114T534	114.065	534.1	8.9	1.0875e+08	1.04633e+08	1.36993e+08	7.12573e+07	1.25081e+08	1.1811e+08	8.1507e+07	7.28335e+07	1.51981e+08	3.27624e+07	1.47027e+08	1.3701e+08	6.80532e+07	8.4098e+07	1.00265e+08	5.46274e+07	3.2241e+07	1.16875e+07	2.92968e+07	8.39451e+07	7.70117e+07	1.36057e+08	1.94997e+07	7.34137e+07	7.66431e+07	6.79803e+07	1.0407e+08	7.50592e+07	7.6864e+07	7.4272e+07	5.20706e+07
M114T554	114.065	553.6	9.2	1.2412e+07	1.35925e+07	1.81101e+07	7.49057e+06	1.67767e+07	8.17464e+06	1.51371e+07	1.20853e+07	1.39595e+07	1.11964e+07	2.56701e+07	1.29806e+07	6.98835e+06	1.23914e+07	1.27334e+07	1.58685e+07	1.00897e+07	1.0656e+07	1.49393e+07	1.46087e+07	9.45407e+06	1.61117e+07	1.07325e+07	2.19174e+07	8.30834e+06	1.11247e+07	1.11706e+07	8.93368e+06	1.0294e+07	1.31887e+07	1.09813e+07
M114T566	114.065	565.7	9.4	3.35721e+07	5.93268e+07	3.5691e+07	2.86444e+07	6.13358e+07	6.65429e+07	3.8684e+07	3.97762e+07	5.65053e+07	1.91992e+07	4.84317e+07	4.23072e+07	3.17896e+07	1.70935e+07	4.33003e+07	1.14812e+07	1.71642e+07	3.05492e+07	5.93514e+07	3.37856e+07	4.42275e+06	6.51261e+07	2.37866e+07	9.50731e+06	2.90535e+07	3.81614e+07	3.57407e+07	4.632e+07	2.05003e+07	4.15115e+07	3.50512e+07
M114T577	114.065	576.7	9.6	4.19118e+07	1.29933e+08	4.05058e+06	1.96567e+08	6.11297e+07	2.29027e+07	2.20883e+07	3.11061e+06	4.35915e+07	6.7472e+07	4.95384e+07	6.09818e+07	9.11766e+07	4.89438e+07	6.52131e+07	5.25553e+07	2.12701e+08	1.25682e+08	2.21976e+08	5.89786e+07	7.53753e+07	6.55746e+07	1.50349e+08	2.13537e+08	5.36334e+07	5.60073e+07	4.08579e+07	7.53857e+07	6.64378e+07	7.64858e+07	5.45977e+07
M114T592	114.065	592.3	9.9	5.18469e+07	2.9206e+07	3.93255e+07	9.90007e+06	4.33208e+07	4.71664e+07	5.01898e+07	5.21117e+07	4.06217e+07	3.76854e+07	6.54207e+07	5.41339e+07	4.55988e+07	4.31987e+07	5.1536e+07	4.60204e+07	3.73559e+07	2.06079e+07	2.0264e+07	4.66268e+07	3.55481e+07	4.22156e+07	2.71101e+07	5.24845e+07	4.7266e+07	2.84062e+07	4.83737e+07	4.17036e+07	4.71068e+07	4.4171e+07	4.43537e+07
M114T607	114.065	606.6	10.1	2.60117e+07	9.35713e+07	6.01882e+07	2.72346e+07	4.34293e+07	5.15204e+07	4.16578e+07	3.05172e+07	4.38751e+07	8.91227e+07	4.14594e+07	4.15366e+07	8.63765e+07	1.09056e+08	7.65551e+07	3.77879e+07	3.53527e+07	8.28565e+07	3.96264e+07	7.34152e+07	8.27827e+07	3.31309e+07	2.39582e+07	8.13401e+07	4.06546e+07	5.51169e+07	5.45914e+07	5.024e+07	5.49011e+07	6.05854e+07	5.12137e+07
M114T618	114.065	618.2	10.3	3.56322e+07	3.8966e+07	8.34577e+07	1.00922e+08	1.24413e+08	7.17484e+07	3.29472e+07	8.06206e+07	8.15437e+07	1.06465e+08	6.89535e+07	5.18239e+07	4.73744e+07	5.4682e+07	5.50344e+07	4.88469e+07	9.41801e+07	1.52247e+08	7.50715e+07	9.02352e+07	3.88804e+07	1.26551e+08	4.00101e+07	8.44861e+07	6.41362e+07	5.80276e+07	9.24671e+07	5.74972e+07	5.7924e+07	6.6815e+07	5.82767e+07
M114T634	114.065	634.3	10.6	1.19289e+08	1.13613e+08	1.17357e+08	5.90954e+07	1.11617e+08	7.40123e+07	8.49197e+07	1.12378e+08	8.44161e+07	6.861e+07	6.65425e+07	1.18577e+08	8.27972e+07	7.27725e+07	7.66878e+07	1.17376e+08	5.36704e+07	5.10829e+07	9.80109e+07	4.64616e+07	9.64051e+07	7.5446e+07	7.92584e+07	9.50707e+07	7.59075e+07	7.41336e+07	9.10762e+07	3.77094e+07	9.79232e+07	8.47452e+07	7.75381e+07
M114T64	114.091	63.8	1.1	1.87636e+07	2.16825e+07	1.81695e+07	2.0694e+07	1.86334e+07	1.88581e+07	1.79843e+07	2.07091e+07	1.68502e+07	1.33794e+07	2.23897e+07	2.22502e+07	1.56987e+07	2.7131e+07	1.87551e+07	2.70979e+07	2.01153e+07	2.05085e+07	2.36632e+07	2.51573e+07	1.84308e+07	1.63626e+07	1.61258e+07	1.64402e+07	1.96992e+07	1.82871e+07	1.83219e+07	1.82905e+07	1.97907e+07	1.97178e+07	1.97762e+07
M114T649	114.065	648.7	10.8	6.05258e+07	2.02706e+07	5.16603e+07	6.56261e+07	4.96395e+07	4.66819e+07	5.76515e+07	3.63725e+07	4.04299e+07	4.38688e+07	2.61347e+07	4.48779e+07	3.5657e+07	6.63837e+07	5.58803e+07	2.5607e+07	1.73706e+07	2.57702e+07	2.309e+07	4.30878e+07	7.04082e+07	4.23515e+07	3.12975e+07	7.98989e+07	3.25414e+07	3.41119e+07	2.15257e+07	3.26552e+07	3.70272e+07	4.72482e+07	4.30983e+07
M114T660	114.065	659.7	11	3.97239e+07	3.26896e+07	4.08094e+07	4.03594e+07	5.54773e+07	4.46785e+07	1.38551e+07	5.50113e+07	4.71336e+07	2.16578e+07	3.27816e+07	2.39718e+07	2.36369e+07	5.04627e+07	4.97915e+07	4.01176e+07	3.58333e+07	1.05434e+08	2.52026e+07	6.76876e+07	5.5283e+07	3.80509e+07	8.2063e+07	2.85938e+07	4.53367e+07	4.56541e+07	2.10646e+07	4.06929e+07	4.50867e+07	3.78386e+07	4.58063e+07
M114T678	114.065	678.3	11.3	3.24289e+07	2.02771e+07	2.05311e+07	2.49839e+07	1.62875e+07	2.78802e+07	2.17739e+07	1.01454e+07	2.69228e+07	3.06567e+07	8.67641e+06	1.46312e+07	1.37009e+07	3.05505e+07	3.32523e+07	1.403e+07	1.21878e+07	3.88525e+07	1.31045e+07	1.44288e+07	1.3099e+07	1.3477e+07	2.27683e+07	1.23458e+07	2.17554e+07	2.16606e+07	1.46653e+07	2.02145e+07	2.16806e+07	8.32934e+06	2.28401e+07
M114T68	113.963	67.7	1.1	7.94509e+07	6.24655e+07	5.7923e+07	6.25659e+07	3.97039e+07	7.9148e+07	4.66789e+07	5.56852e+07	6.39423e+07	7.04495e+07	6.85967e+07	5.04627e+07	3.36681e+07	3.95256e+07	5.79594e+07	6.513e+07	3.25055e+07	5.89963e+07	4.83915e+07	5.46466e+07	5.78618e+07	6.63642e+07	6.20142e+07	3.97114e+07	5.06944e+07	5.77423e+07	5.77234e+07	5.12005e+07	6.03603e+07	6.32546e+07	6.0113e+07
M114T686	114.065	686.1	11.4	4.74587e+07	3.95592e+07	3.68894e+07	4.77249e+07	2.70466e+07	8.75341e+06	5.4765e+07	3.68468e+07	5.32704e+07	4.38823e+07	5.39475e+07	3.42528e+07	5.37231e+07	3.77766e+07	5.63168e+07	6.44288e+07	3.53754e+07	5.60269e+07	7.07161e+07	7.51137e+07	2.75446e+07	5.35527e+07	4.19608e+07	6.16308e+07	5.40883e+07	4.87397e+07	5.11944e+07	4.88371e+07	3.76315e+07	4.88052e+07	5.12098e+07
M114T698	114.065	698.5	11.6	2.70295e+07	6.51476e+07	3.77599e+07	2.92123e+07	5.80005e+07	3.88004e+07	5.56258e+07	4.77431e+07	5.17687e+07	7.06321e+07	3.19569e+07	5.53479e+07	6.06724e+07	2.61158e+07	3.67546e+07	5.15861e+07	6.13056e+07	5.00858e+07	2.74163e+07	5.9206e+07	2.04902e+07	3.75223e+07	2.93084e+07	4.62806e+07	4.48204e+07	4.14203e+07	4.13012e+07	4.56632e+07	4.11949e+07	4.43233e+07	3.39001e+07
M114T731	114.065	730.8	12.2	3.34504e+07	5.73758e+07	5.2121e+07	4.45025e+07	2.71791e+07	3.85568e+07	6.7058e+07	5.40639e+07	4.69501e+07	3.60945e+07	5.98713e+07	6.02851e+07	9.13291e+07	7.10183e+07	6.74536e+07	4.71809e+07	4.10546e+07	5.89432e+07	3.84081e+07	5.41827e+07	8.62681e+07	7.15101e+07	5.57213e+07	6.91126e+07	6.25798e+07	3.34914e+07	6.19207e+07	6.22197e+07	6.17689e+07	5.26104e+07	6.18227e+07
M114T752	114.065	752	12.5	1.49195e+07	3.85181e+07	3.10798e+07	5.89087e+07	4.58195e+07	3.95555e+07	4.89773e+07	1.02525e+07	4.26067e+07	4.27695e+07	3.96466e+07	6.7955e+07	6.45042e+07	4.67473e+07	1.41975e+07	4.21773e+07	6.33616e+07	3.22038e+07	3.09993e+07	4.37359e+07	4.07722e+07	2.7907e+07	6.64301e+07	4.53152e+07	3.69019e+07	3.69583e+07	3.91838e+07	1.54458e+07	3.69025e+07	4.00841e+07	3.90874e+07
M114T799	113.963	798.9	13.3	3.2068e+08	2.97529e+08	2.56591e+08	3.20894e+08	3.48128e+08	2.24316e+08	2.305e+08	2.26401e+08	2.62577e+08	2.69683e+08	2.91831e+08	2.79382e+08	2.40351e+08	2.62722e+08	2.82003e+08	2.53506e+08	2.37178e+08	1.06813e+08	2.40746e+08	2.72245e+08	1.79374e+08	1.61872e+08	2.4354e+08	2.13603e+08	2.19701e+08	2.32006e+08	2.32486e+08	2.31806e+08	2.22262e+08	1.43852e+08	2.31689e+08
M114T813	114.065	813.1	13.6	1.67588e+08	8.55393e+07	1.68784e+08	1.51991e+08	1.23056e+08	9.55639e+07	1.96623e+08	2.01925e+08	1.37035e+08	1.08653e+08	1.85219e+08	1.5865e+08	1.38769e+08	1.60746e+08	1.43944e+08	5.83143e+07	2.32287e+08	8.55054e+07	1.62879e+08	2.75936e+08	1.44419e+08	1.28487e+08	1.11177e+08	7.52983e+07	1.57637e+08	1.27297e+08	1.57731e+08	1.47602e+08	1.57599e+08	1.57693e+08	1.53956e+08
M114T92	114.066	91.7	1.5	1.44225e+08	2.32088e+09	1.36276e+09	1.5187e+09	1.75699e+08	1.26934e+08	4.71398e+08	1.40815e+09	2.53054e+08	1.55063e+09	3.62277e+08	1.97615e+09	1.87433e+08	2.50935e+09	1.4659e+09	5.40257e+08	2.63323e+09	2.5488e+08	1.67095e+09	1.73866e+09	2.63899e+09	1.19951e+09	1.24008e+09	2.00723e+09	6.81869e+08	6.83117e+08	6.78114e+08	6.89224e+08	8.10245e+08	6.80372e+08	8.22094e+08
M115T309	115.039	309.4	5.2	1.12844e+08	1.72742e+08	1.87876e+08	5.42375e+07	1.59133e+08	1.01134e+08	1.32853e+08	1.17913e+08	1.09002e+08	2.92991e+07	1.37436e+08	1.16526e+08	3.65716e+07	7.7003e+07	2.82922e+07	1.66794e+08	1.45827e+08	1.07293e+08	1.64137e+08	1.33064e+08	1.64711e+08	9.49579e+07	1.07247e+08	1.30127e+08	1.19034e+08	1.18957e+08	1.52363e+08	1.19014e+08	1.19385e+08	1.2391e+08	1.23894e+08
M115T36	114.971	35.7	0.6	3.38231e+06	2.98222e+06	3.51256e+06	2.94717e+06	3.05988e+06	2.90448e+06	3.49748e+06	3.1602e+06	2.941e+06	3.0908e+06	2.99666e+06	2.84993e+06	2.82161e+06	3.23524e+06	2.84582e+06	2.92074e+06	2.85038e+06	2.87351e+06	2.67965e+06	3.06042e+06	2.92142e+06	3.02939e+06	2.95894e+06	2.5129e+06	3.18085e+06	3.02184e+06	3.02252e+06	2.99276e+06	2.91979e+06	3.02284e+06	2.99342e+06
M115T377	115.039	377.3	6.3	730176	751021	724906	721929	845133	751541	1.01073e+06	817182	744621	726805	755651	719660	785831	634047	937878	889381	1.01554e+06	754490	1.13745e+06	910759	716610	683150	715927	769649	765131	766339	741436	726804	765197	766160	540931
M115T387	115.075	387.4	6.5	3.90546e+06	1.35014e+06	200588	33565.3	1.83546e+06	2.08042e+06	1.82416e+06	15296.5	1.98278e+06	187770	1.4028e+06	438393	1.50058e+06	216047	340360	399969	2.31629e+06	3.74756e+06	1.39782e+06	3.98092e+06	2.52076e+06	1.6157e+06	1.02184e+06	1.69039e+06	966027	2.99069e+06	2.78308e+06	2.50312e+06	2.9762e+06	3.10379e+06	2.9727e+06
M115T397	115.054	397.1	6.6	753469	555984	156939	780544	727832	104789	660864	129077	594940	446931	493990	117170	1.29633e+06	136856	665788	747172	731173	926689	1.05273e+06	410135	520813	130622	1.09169e+06	507597	259736	601009	643485	642786	623486	644466	643236
M115T419	115.095	418.7	7	606124	438200	572033	835550	528880	337536	475507	537822	1.28131e+06	1.40332e+06	725947	1.0744e+06	1.35977e+06	2.07562e+06	694655	1.67774e+06	1.61378e+06	1.8908e+06	1.90929e+06	793493	1.67614e+06	1.61372e+06	887830	2.25652e+06	1.37556e+06	1.3983e+06	1.35404e+06	1.37458e+06	1.22657e+06	1.35344e+06	1.35394e+06
M115T487	115.075	487.4	8.1	564323	874465	663806	171586	555411	997766	1.15799e+06	1.38044e+06	571185	584048	975758	2.09329e+06	847638	955605	490905	524961	1.02723e+06	466473	613183	262328	857665	550358	193090	1.44441e+06	791523	601073	468135	700780	596099	577371	831474
M115T72	114.988	71.8	1.2	2.65767e+06	2.46661e+06	2.58492e+06	1.75557e+06	2.67348e+06	1.56564e+06	2.8982e+06	1.87847e+06	2.124e+06	2.08298e+06	3.10982e+06	2.11249e+06	3.07336e+06	2.06223e+06	2.2757e+06	2.21577e+06	2.37616e+06	2.3216e+06	2.66495e+06	2.40044e+06	2.07391e+06	2.05529e+06	2.05071e+06	2.34258e+06	805523	802058	812949	979994	1.13137e+06	1.09025e+06	461851
M115T76	115.087	76	1.3	1.81162e+06	1.95998e+06	2.08971e+06	1.94795e+06	2.13848e+06	1.9263e+06	1.9112e+06	1.74457e+06	2.14701e+06	1.86655e+06	2.4672e+06	2.05014e+06	2.01855e+06	1.95411e+06	1.99216e+06	1.89807e+06	2.11069e+06	1.8004e+06	1.84717e+06	2.52094e+06	1.99833e+06	1.78308e+06	1.94703e+06	2.29788e+06	1.98906e+06	2.01099e+06	1.14616e+06	1.96394e+06	2.09255e+06	1.88482e+06	1.89716e+06
M115T89	115.087	89	1.5	3.5077e+06	3.47539e+06	3.51825e+06	3.30521e+06	3.41883e+06	3.37516e+06	3.35747e+06	3.24937e+06	2.85774e+06	2.15617e+06	1.39484e+06	2.46605e+06	3.15338e+06	1.49767e+06	3.69137e+06	2.63224e+06	802899	1.4346e+06	1.27989e+06	1.3675e+06	1.00835e+06	1.24235e+06	1.01392e+06	1.12271e+06	2.42519e+06	892486	1.69591e+06	2.35933e+06	1.72213e+06	1.92801e+06	1.7307e+06
M115T92	115.07	91.7	1.5	2.99055e+06	1.03737e+07	3.01522e+07	7.38115e+06	6.42211e+06	3.17598e+06	3.00798e+07	3.21157e+07	5.1735e+06	5.58813e+07	2.87828e+07	3.42113e+07	4.51517e+06	7.73349e+07	3.27146e+07	3.11606e+07	6.88555e+07	2.45538e+07	3.57878e+07	4.16764e+07	6.37698e+07	3.50763e+07	3.31044e+07	6.99939e+07	1.08849e+07	3.31056e+07	3.0732e+07	3.306e+07	3.23629e+07	3.21054e+07	3.28381e+07
M115T94	115.05	94.2	1.6	1.00606e+07	4.6404e+06	9.11212e+06	428569	8.94342e+06	8.99953e+06	1.91583e+07	9.1027e+06	1.53179e+07	2.09548e+07	1.9147e+07	1.28102e+06	274678	1.11507e+07	1.03737e+06	1.64323e+06	582337	68022.8	2.56646e+06	7.37619e+06	3.84659e+06	9.65088e+06	8.43042e+06	396703	5.1783e+06	5.67166e+06	4.78913e+06	4.7875e+06	5.65672e+06	4.29584e+06	1.73844e+06
M116T100	116.082	99.8	1.7	115959	725315	1.38554e+06	697877	942342	1.61995e+06	684322	128501	115819	1.43084e+06	766838	103224	1.32598e+06	79545	858390	580346	755719	1.09291e+06	1.31033e+06	2.133e+06	1.43069e+06	499837	549122	184257	722095	723859	720520	1.02303e+06	720551	716799	765372
M116T103	116.107	103.1	1.7	5.03728e+06	9.83838e+06	5.88083e+06	9.39647e+06	4.12107e+06	3.22629e+06	6.30362e+06	8.51025e+06	6.16594e+06	1.27317e+07	5.28147e+06	9.22905e+06	4.20392e+06	1.56637e+07	8.4021e+06	8.46275e+06	1.41749e+07	6.24397e+06	7.92246e+06	8.05246e+06	1.2704e+07	1.11105e+07	8.46192e+06	1.61197e+07	8.4106e+06	7.46927e+06	8.53727e+06	8.53539e+06	8.53519e+06	8.41096e+06	8.53225e+06
M116T309	116.042	309.1	5.2	7.8403e+06	1.67338e+07	1.20688e+06	2.24013e+07	1.02399e+07	1.31945e+06	1.02577e+06	510395	1.23998e+06	452691	1.36445e+06	794301	8.95891e+06	118594	510940	679988	5.10753e+06	7.29963e+06	4.07025e+06	7.09559e+06	1.46103e+06	594003	3.67123e+06	2.2008e+06	5.76145e+06	5.99471e+06	5.74652e+06	5.59856e+06	6.52354e+06	7.29847e+06	5.77023e+06
M116T356	116.034	356.4	5.9	854197	687832	1.17647e+06	556719	922421	128179	880126	822569	1.28858e+06	1.66991e+06	1.09667e+06	1.64409e+06	1.61972e+06	1.71115e+06	1.8223e+06	1.67654e+06	1.23384e+06	1.51631e+06	1.31317e+06	1.15398e+06	1.47995e+06	1.52926e+06	1.27998e+06	1.29868e+06	725752	1.05522e+06	1.0434e+06	1.05333e+06	1.10659e+06	1.05003e+06	1.00552e+06
M116T363	115.574	362.6	6	59523.7	515466	263721	109698	170080	697394	19180.8	168573	89729.7	600384	383163	236364	2.06217e+06	84862.5	791414	865616	215422	916586	1.49906e+06	189532	1.09375e+06	539588	122846	433874	417907	581435	533660	410512	578104	532921	591371
M116T76	116.07	75.9	1.3	1.22886e+07	8.39236e+06	8.56305e+06	8.1355e+06	1.01422e+07	8.7989e+06	7.81975e+06	7.85279e+06	7.83512e+06	7.45606e+06	9.21558e+06	8.00227e+06	8.9548e+06	8.22466e+06	8.29037e+06	7.18033e+06	1.15694e+07	1.18092e+07	1.11446e+07	9.44615e+06	1.37347e+07	7.46837e+06	8.76965e+06	7.51766e+06	8.56873e+06	9.10773e+06	7.54496e+06	9.00993e+06	9.01113e+06	8.37205e+06	9.00685e+06
M116T787	116.053	786.8	13.1	768142	523260	953733	659755	219356	852186	3.75973e+06	1.56502e+06	1.14326e+06	1.36534e+06	2.31349e+06	897519	1.23165e+06	4.30596e+06	480337	408489	719625	2.04699e+06	598528	2.88308e+06	880098	1.93816e+06	1.02375e+06	378160	4.33443e+06	2.81434e+06	4.33006e+06	4.33554e+06	2.59957e+06	4.09773e+06	4.3226e+06
M116T800	115.964	799.5	13.3	1.10067e+06	1.02905e+06	1.88781e+06	952467	1.35068e+06	1.02651e+06	768633	1.09524e+06	1.06797e+06	1.14666e+06	1.72768e+06	1.13621e+06	1.0325e+06	1.98355e+06	1.92902e+06	2.00441e+06	2.58723e+06	837198	1.11941e+06	2.12237e+06	1.11748e+06	1.22394e+06	940016	1.66719e+06	1.18795e+06	1.26524e+06	1.28858e+06	1.26455e+06	1.18885e+06	1.18381e+06	1.18603e+06
M116T806	115.964	806.4	13.4	959619	377806	3.52067e+06	877844	872257	1.34354e+06	652587	783494	679800	2.58993e+06	2.62661e+06	3.06428e+06	1.19935e+06	2.41655e+06	1.91079e+06	3.76951e+06	1.59481e+06	2.16872e+06	4.05363e+06	743134	2.46223e+06	975686	649215	1.0247e+06	2.15542e+06	2.15638e+06	2.15014e+06	1.43868e+06	2.14355e+06	2.15001e+06	1.4039e+06
M116T85	116.034	85.1	1.4	1.68072e+07	3.30958e+07	3.02963e+07	1.11222e+07	1.87494e+07	2.34614e+07	4.41241e+07	2.3231e+07	3.12523e+07	2.7628e+07	2.5536e+07	2.66399e+07	2.87681e+07	2.42196e+07	3.2995e+07	2.99679e+07	1.78915e+07	2.2365e+07	2.28295e+07	2.8592e+07	2.45421e+07	3.48883e+07	2.71873e+07	2.0047e+07	2.42496e+07	2.29987e+07	1.89011e+07	2.34643e+07	2.41336e+07	2.30011e+07	2.59778e+07
M116T96	116.07	96.3	1.6	1.9163e+09	1.37318e+09	1.39897e+09	1.27953e+09	2.08028e+09	1.86564e+09	4.817e+08	1.37687e+09	1.4873e+09	1.37717e+09	1.49488e+09	5.40864e+08	4.96559e+08	1.25242e+09	1.30252e+09	1.6546e+09	1.84302e+09	1.4123e+09	2.38431e+09	1.26211e+09	1.41942e+09	1.21295e+09	1.75772e+09	1.65151e+09	5.0291e+08	1.33816e+09	1.12925e+09	1.12735e+09	1.0503e+09	7.19639e+08	1.11507e+09
M117T108	116.966	107.7	1.8	1.36982e+07	1.25019e+07	1.05821e+07	1.38117e+07	1.13499e+07	1.06567e+07	1.08431e+07	1.18418e+07	1.58382e+07	1.6437e+07	1.93724e+07	1.56759e+07	1.64877e+07	1.53463e+07	1.47913e+07	1.4549e+07	1.20443e+07	1.71423e+07	1.35082e+07	1.35228e+07	1.06161e+07	1.29617e+07	1.4015e+07	1.46564e+07	1.58887e+07	1.32954e+07	1.30261e+07	1.30129e+07	1.34096e+07	1.30106e+07	1.34139e+07
M117T115	116.51	114.5	1.9	1.76313e+06	2.00581e+06	2.0561e+06	1.8751e+06	1.76963e+06	526569	2.46525e+06	1.97689e+06	2.20139e+06	2.48124e+06	3.00053e+06	2.68192e+06	3.09313e+06	2.40724e+06	3.10783e+06	2.55071e+06	1.76502e+06	2.91792e+06	2.02941e+06	1.91806e+06	2.30756e+06	2.5189e+06	2.39707e+06	1.70028e+06	2.72911e+06	2.72971e+06	2.62067e+06	2.6172e+06	2.41767e+06	2.8502e+06	2.72364e+06
M117T266	116.966	266.3	4.4	3.23355e+06	2.69778e+06	5.76819e+06	3.7801e+06	6.52224e+06	2.38271e+06	6.42029e+06	4.98813e+06	6.66357e+06	1.00489e+07	6.7266e+06	7.03753e+06	9.64665e+06	8.51488e+06	1.04505e+07	8.87148e+06	5.04742e+06	5.80813e+06	6.19433e+06	4.5001e+06	6.20253e+06	5.03072e+06	6.52491e+06	5.54911e+06	5.52673e+06	5.53796e+06	4.64597e+06	5.95047e+06	5.79921e+06	5.81484e+06	5.81232e+06
M117T309	117.043	308.7	5.1	1.0749e+06	4.67812e+06	351247	290282	150609	185425	410719	359316	50737.7	979920	65646.9	199970	663869	240017	404926	271192	71071.5	64500.2	911482	1.44272e+06	128128	61526.1	43029.1	312281	507814	480783	477273	509959	512822	504975	508789
M117T334	117.055	334.1	5.6	9543.18	460158	317840	14226.9	7020.07	12096.1	192298	484517	104912	2739.34	617876	313059	600092	301194	517537	283576	433053	460020	30334.3	151093	181143	98715.5	245495	561784	539445	603398	562089	539511	455864	562648	443080
M117T432	117.102	432.1	7.2	617011	689317	839579	391039	505055	815606	637737	448106	1.04097e+06	733862	694321	816910	1.04228e+06	854416	904945	636282	560221	564575	428728	651774	651739	636465	792952	666362	816993	673495	679575	661176	567417	586565	367993
M117T756	116.524	756.5	12.6	5.59397e+06	2.75399e+06	1.3926e+07	4.49124e+06	1.36204e+07	2.27355e+07	1.35908e+07	8.91621e+06	5.64875e+06	1.3306e+07	2.59016e+07	1.99285e+07	5.49138e+06	1.12266e+07	9.60315e+06	1.34226e+07	1.26379e+07	6.83946e+06	5.95985e+06	1.59223e+07	5.87176e+06	1.11983e+07	2.29671e+06	1.61963e+07	9.28872e+06	8.30393e+06	9.26827e+06	8.18976e+06	1.02035e+07	8.06948e+06	7.91736e+06
M117T90	117.055	90.2	1.5	1.45791e+06	1.4575e+06	1.09418e+06	1.49514e+06	1.2516e+06	1.70723e+06	1.22575e+06	783584	743537	2.24936e+06	1.26353e+06	2.05223e+06	1.66801e+06	1.51848e+06	1.63919e+06	2.74643e+06	938569	1.14204e+06	1.39704e+06	831976	1.01758e+06	1.36252e+06	872098	1.40911e+06	1.31971e+06	1.47942e+06	1.17153e+06	1.16645e+06	1.1537e+06	1.3829e+06	1.15501e+06
M117T96	117.074	96.3	1.6	8.71653e+07	5.86859e+07	7.14187e+07	4.93527e+07	5.46762e+07	5.69242e+07	6.48936e+07	7.74542e+07	6.04628e+07	6.52204e+07	6.34483e+07	7.13174e+07	6.65861e+07	7.56996e+07	6.66788e+07	6.26187e+07	5.68142e+07	6.15392e+07	6.96398e+07	6.90842e+07	6.0354e+07	7.72631e+07	6.31798e+07	6.67086e+07	5.78666e+07	5.78985e+07	5.89929e+07	5.79629e+07	6.30361e+07	5.90688e+07	5.93782e+07
M118T111	118.123	111	1.9	1.55858e+06	1.21879e+06	1.57438e+06	739394	1.56411e+06	824366	1.06932e+06	1.20903e+06	1.32421e+06	881003	1.55086e+06	1.43867e+06	1.06592e+06	1.07005e+06	837756	1.12417e+06	1.22301e+06	980360	1.02252e+06	1.50752e+06	871605	1.19035e+06	911698	1.33458e+06	1.00036e+06	1.17638e+06	1.12848e+06	979675	1.09946e+06	1.12852e+06	1.13363e+06
M118T120	118.086	120.2	2	1.6855e+09	9.82314e+08	1.4717e+09	1.18691e+09	1.61189e+09	1.483e+09	9.27537e+08	3.93663e+08	1.43193e+09	1.63764e+09	1.47187e+09	1.40999e+09	1.05084e+09	3.75222e+08	1.39096e+09	1.26306e+09	1.61367e+09	1.1316e+09	1.52859e+09	1.23623e+09	1.51443e+09	4.09549e+08	1.41909e+09	1.33472e+09	1.16224e+09	1.16214e+09	1.09048e+09	1.15887e+09	1.16194e+09	1.21792e+09	1.11801e+09
M118T308	118.023	308.3	5.1	705.51	336130	382446	833.002	312.065	39944.3	289630	313105	30751.3	755.248	431942	122546	464348	86357.7	76004.3	256141	414903	328817	2312.81	209884	147585	2359.75	267230	305080	296335	322662	296500	291081	296718	271734	147277
M118T339	118.065	338.5	5.6	1.58014e+06	1.60424e+06	906619	649297	459393	396880	2.34495e+06	2.16253e+06	3.67768e+06	909914	244048	2.38148e+06	413402	1.24939e+06	1.53975e+06	1.30638e+06	2.18428e+06	189557	3.94546e+06	2.91837e+06	755882	661559	955753	3.4181e+06	1.43743e+06	1.45934e+06	1.73299e+06	1.73008e+06	2.08148e+06	1.51929e+06	1.25615e+06
M118T35	118.085	35.3	0.6	3.37586e+07	3.45738e+07	3.61372e+07	3.41291e+07	3.77494e+07	4.30923e+07	3.52826e+07	3.46003e+07	3.69354e+07	3.26781e+07	3.35886e+07	3.72029e+07	3.70315e+07	3.2325e+07	3.50363e+07	3.38255e+07	2.96686e+07	2.9553e+07	3.24765e+07	3.4652e+07	2.99295e+07	3.81731e+07	3.34038e+07	2.54915e+07	3.49577e+07	3.47453e+07	3.4663e+07	3.46634e+07	3.4949e+07	3.46636e+07	3.49494e+07
M118T399	118.065	399.3	6.7	9.89603e+06	1.9311e+07	1.51961e+07	1.20514e+07	2.21078e+07	9.49513e+06	1.52821e+07	1.70663e+07	5.38216e+06	5.43333e+06	7.57229e+06	3.62651e+06	9.72397e+06	2.81792e+06	5.32008e+06	2.69222e+06	1.57661e+07	1.09346e+07	2.59248e+07	2.78625e+07	2.04606e+07	4.67451e+06	7.36744e+06	7.9042e+06	1.08489e+07	1.12809e+07	1.08499e+07	1.14499e+07	1.14212e+07	9.30291e+06	1.27752e+07
M118T89	118.061	88.8	1.5	5.30529e+06	3.80982e+06	4.18773e+06	5.13423e+06	4.67768e+06	4.66276e+06	5.96954e+06	5.27924e+06	4.42918e+06	2.69446e+06	4.32527e+06	4.5193e+06	3.99954e+06	4.03285e+06	4.69116e+06	4.61147e+06	4.38353e+06	2.72365e+06	4.18242e+06	4.87626e+06	4.19766e+06	5.12678e+06	2.10166e+06	4.47878e+06	3.26185e+06	3.70682e+06	3.00728e+06	3.41888e+06	3.27254e+06	3.43147e+06	3.64929e+06
M118T90	118.086	90.4	1.5	1.54465e+08	1.13275e+08	1.31508e+08	1.57127e+08	2.01921e+08	1.99162e+08	1.80595e+08	2.02305e+08	7.01117e+07	1.79967e+08	6.62499e+08	1.60508e+08	1.47449e+08	1.1888e+08	1.63121e+08	1.38362e+08	2.30516e+08	1.24561e+08	1.79086e+08	4.21991e+08	3.28919e+08	1.06384e+08	1.16988e+08	7.58309e+08	1.874e+08	1.68311e+08	1.95846e+08	1.67477e+08	1.11475e+08	1.37045e+08	7.41843e+07
M118T97	118.075	96.7	1.6	109296	5.70713e+06	913308	42686.7	115807	91666.4	4.26143e+06	3.51728e+06	60259.7	60903.2	1.0186e+06	1.34851e+06	5.58921e+06	8.01049e+06	1.23164e+06	3.74491e+06	2.43288e+06	3.13433e+06	68637.1	1.14468e+07	679409	293680	1.23658e+06	4.24451e+06	3.68169e+06	5.24218e+06	2.36853e+06	3.68667e+06	3.20206e+06	3.70562e+06	3.24567e+06
M119T105	119.016	104.8	1.7	359897	179306	360770	341034	335604	260093	383657	333908	1.4946e+07	2.10087e+07	2.0345e+07	1.60635e+07	1.2673e+07	1.80832e+07	2.22841e+07	2.13085e+07	327568	9.42917e+06	348696	327602	351865	1.34207e+07	1.02956e+07	2.91098e+06	4.14992e+06	5.1227e+06	5.04475e+06	5.07082e+06	3.73259e+06	5.07173e+06	5.29883e+06
M119T120	119.09	120.2	2	6.05736e+07	6.65723e+07	9.0077e+07	6.34045e+07	8.30728e+07	5.09012e+07	8.65025e+07	7.88604e+07	7.80363e+07	6.8532e+07	7.93244e+07	8.71298e+07	7.86287e+07	8.94428e+07	8.58543e+07	7.3804e+07	6.69546e+07	5.01046e+07	8.41245e+07	7.42866e+07	7.23413e+07	6.66413e+07	5.77373e+07	4.53821e+07	6.28024e+07	6.38517e+07	6.28191e+07	6.39013e+07	6.35483e+07	7.13181e+07	6.39174e+07
M119T125	119.049	124.5	2.1	8.57071e+06	1.09646e+07	8.8359e+06	4.70431e+06	9.07739e+06	6.3607e+06	1.55659e+07	1.22277e+07	9.16209e+06	1.05265e+07	8.6134e+06	1.05625e+07	5.20247e+06	1.09827e+07	1.0068e+07	9.37022e+06	8.79675e+06	9.14264e+06	3.91905e+06	8.44727e+06	8.88581e+06	1.24806e+07	6.52193e+06	1.78722e+07	8.21839e+06	8.21793e+06	7.62768e+06	9.53218e+06	9.3614e+06	7.25157e+06	7.9592e+06
M119T139	119.049	139.2	2.3	4.94473e+06	4.98462e+06	5.30432e+06	4.16855e+06	3.98128e+06	4.44746e+06	5.17096e+06	7.633e+06	3.72539e+06	8.79434e+06	4.05824e+06	4.12976e+06	3.64506e+06	4.76632e+06	4.19038e+06	3.21066e+06	5.70763e+06	518894	2.75566e+06	1.90772e+06	3.26817e+06	3.7055e+06	465726	4.0635e+06	3.70205e+06	3.58568e+06	3.71519e+06	5.1179e+06	4.06397e+06	4.05863e+06	3.79178e+06
M119T191	119.049	190.9	3.2	2.61875e+06	1.9393e+06	2.61848e+06	2.2783e+06	3.23419e+06	2.20475e+06	2.85475e+06	2.41566e+06	2.22383e+06	2.62744e+06	2.76324e+06	3.38142e+06	3.14604e+06	3.30498e+06	3.63185e+06	2.79246e+06	2.95474e+06	3.28609e+06	4.42764e+06	3.2847e+06	3.05407e+06	2.49914e+06	2.62219e+06	1.52135e+06	2.51759e+06	2.75479e+06	2.36014e+06	2.8291e+06	2.56913e+06	2.53245e+06	2.51923e+06
M119T400	119.073	399.5	6.7	1.75428e+06	5.71255e+06	3.53818e+06	2.31245e+06	5.75472e+06	2.07391e+06	5.10397e+06	3.68447e+06	1.28707e+07	1.50831e+07	7.78336e+06	1.11364e+07	1.08911e+07	1.5191e+07	1.50341e+07	1.47377e+07	4.02951e+06	2.47182e+07	5.78004e+06	5.13316e+06	2.69746e+06	1.80715e+07	2.37765e+07	1.78281e+07	5.62951e+06	5.85335e+06	6.22091e+06	5.82341e+06	5.83388e+06	6.16116e+06	6.90409e+06
M119T585	119.049	584.9	9.7	227922	555445	614448	182867	609215	437043	874754	724748	718734	1.07864e+06	722682	1.00187e+06	118807	1.59315e+06	756915	787741	734759	661481	725927	968514	870152	771827	614021	846807	470202	632749	568095	653846	629209	464967	628944
M119T64	119.085	64.2	1.1	392050	205088	245490	394248	273785	331439	325215	325407	396841	172427	430453	441311	321988	436337	428083	352989	176538	403028	315689	165475	437476	278052	393938	240342	428651	418333	399426	383722	429980	424592	453860
M119T699	119.049	699.3	11.7	410390	411871	155369	468389	75602.9	27169.8	207583	248955	350842	213116	304115	308412	60264.3	303595	337820	144910	210496	217369	170160	366701	238649	289034	457195	54197.8	280835	258396	303245	315940	281558	302859	309917
M119T72	119.014	71.7	1.2	1.50611e+06	1.26177e+06	1.37869e+06	1.13086e+06	1.21759e+06	1.08091e+06	1.5862e+06	1.32842e+06	1.69568e+06	1.28126e+06	1.56336e+06	1.46604e+06	104539	161427	211985	1.40209e+06	1.69204e+06	1.6205e+06	1.24906e+06	1.51311e+06	1.06261e+06	1.4701e+06	1.3617e+06	1.36997e+06	1.28336e+06	1.28411e+06	1.284e+06	1.28358e+06	1.34431e+06	1.32005e+06	1.31759e+06
M119T73	118.984	73	1.2	3.1892e+06	244632	937645	1.02123e+06	3.35567e+06	3.07899e+06	1.00139e+06	545552	5.3483e+06	1.23103e+06	903027	1.72396e+06	338306	4.01271e+06	2.44949e+06	679983	2.83324e+06	659912	1.952e+06	861719	975537	2.76734e+06	1.19424e+06	5.03684e+06	1.61611e+06	1.51828e+06	2.12615e+06	1.50208e+06	1.87772e+06	1.49731e+06	2.10187e+06
M119T760	119.014	759.5	12.7	3.38209e+06	3.01378e+06	9.45035e+06	7.04377e+06	2.34011e+06	5.82338e+06	3.70327e+06	8.96166e+06	7.46748e+06	3.1533e+06	6.65239e+06	5.16645e+06	5.73792e+06	7.7141e+06	6.66181e+06	7.04234e+06	5.84977e+06	7.18925e+06	4.64513e+06	7.91397e+06	7.12259e+06	5.09497e+06	6.08922e+06	5.44431e+06	4.90478e+06	6.69166e+06	3.5108e+06	4.37561e+06	4.36362e+06	4.48986e+06	5.02694e+06
M119T790	119.014	789.6	13.2	1.04214e+07	3.77321e+06	4.96495e+06	9.26158e+06	2.72045e+06	4.07078e+06	3.29841e+06	9.35627e+06	5.6979e+06	5.75468e+06	7.74141e+06	3.68041e+06	2.46796e+06	5.01041e+06	1.12061e+07	7.16512e+06	5.99163e+06	1.21408e+07	1.12352e+07	1.257e+07	9.98213e+06	1.06825e+07	9.89164e+06	1.16373e+07	8.10948e+06	7.87142e+06	8.64305e+06	8.3751e+06	7.2484e+06	7.96459e+06	8.18301e+06
M119T802_1	119.014	802.3	13.4	1.22968e+06	1.09885e+06	1.43984e+06	1.58671e+06	1.45125e+06	805893	1.59244e+06	1.91687e+06	1.27839e+06	2.13046e+06	1.36345e+06	1.77588e+06	1.05086e+06	2.20061e+06	1.427e+06	1.95921e+06	1.26514e+06	2.27361e+06	1.31048e+06	875807	1.80508e+06	1.67849e+06	1.76005e+06	1.97542e+06	1.47757e+06	1.47455e+06	1.1947e+06	1.63114e+06	1.47462e+06	1.42682e+06	1.42776e+06
M119T802_2	119.084	801.6	13.4	4.83405e+06	1.3974e+06	2.32551e+06	2.28626e+06	1.61333e+06	1.66357e+06	1.42064e+06	2.1226e+06	1.12982e+06	2.98273e+06	1.20064e+06	1.28848e+06	2.08874e+06	3.42165e+06	4.79303e+06	3.00245e+06	3.50842e+06	2.51544e+06	4.89975e+06	1.58655e+06	4.25157e+06	3.45465e+06	4.70724e+06	7.52257e+06	2.99784e+06	2.99615e+06	2.09955e+06	2.98579e+06	1.58522e+06	2.81052e+06	2.9994e+06
M119T813	119.084	812.7	13.5	532653	762876	716807	655181	970182	600491	757064	695693	833102	1.28355e+06	729858	1.27274e+06	795575	1.24942e+06	1.35887e+06	1.34337e+06	968846	468149	1.01589e+06	751843	1.62177e+06	998151	708993	1.15136e+06	777992	701909	928723	894599	893835	896315	862201
M120T100	120.066	99.7	1.7	5.73744e+06	6.51398e+06	6.44046e+06	8.09893e+06	6.90246e+06	5.64845e+06	7.4154e+06	6.85517e+06	7.68058e+06	8.8545e+06	7.35491e+06	8.5966e+06	6.61203e+06	8.6448e+06	7.56059e+06	7.33175e+06	7.52208e+06	7.20725e+06	8.50765e+06	6.59556e+06	8.12035e+06	6.94105e+06	6.8868e+06	8.05222e+06	6.31529e+06	6.80628e+06	6.6639e+06	6.80585e+06	6.78557e+06	6.667e+06	7.22036e+06
M120T120	120.091	120	2	4.26498e+06	4.60429e+06	5.82291e+06	3.94034e+06	4.26781e+06	5.50018e+06	5.88843e+06	6.15494e+06	5.44697e+06	4.27228e+06	1.89921e+06	3.84233e+06	6.45294e+06	4.0202e+06	3.58946e+06	4.34647e+06	2.60968e+06	7.20411e+06	3.6578e+06	4.52038e+06	3.31955e+06	4.313e+06	3.62539e+06	4.84559e+06	2.58288e+06	2.91771e+06	3.69691e+06	3.69548e+06	3.71406e+06	3.46824e+06	3.71136e+06
M120T338	120.081	338.3	5.6	7.52953e+08	1.02746e+09	5.54304e+08	1.05706e+09	7.14119e+08	8.86854e+08	6.48637e+08	6.52754e+08	1.04109e+09	1.44123e+09	5.93439e+08	8.47175e+08	9.65387e+08	8.88261e+08	7.8569e+08	8.99845e+08	8.97996e+08	6.53401e+08	8.55919e+08	6.8773e+08	9.04577e+08	7.58754e+08	5.80415e+08	4.76643e+08	6.95485e+08	8.11143e+08	6.6094e+08	7.0002e+08	6.57974e+08	7.03784e+08	5.58955e+08
M120T342	120.044	341.9	5.7	448.518	107611	137855	19155.5	379.109	1891.79	124056	35269.7	5556.61	680.877	149892	39007.7	126689	102625	191379	92393.7	30975.7	94365.6	10426.2	97290.4	96852.9	4396.67	149186	138529	30790.8	94058	92794.2	94073.3	89340.2	93918.3	88744.8
M120T83	120.102	83.4	1.4	1.93699e+06	1.57707e+06	1.48177e+06	1.85104e+06	2.3966e+06	1.381e+06	4.41654e+06	1.51208e+06	1.67863e+06	2.24508e+06	1.90286e+06	1.49681e+06	1.72931e+06	2.63831e+06	1.5757e+06	2.00695e+06	1.01847e+06	2.56286e+06	1.83342e+06	2.20247e+06	346206	1.64479e+06	1.30019e+06	2.03717e+06	1.7361e+06	1.79427e+06	1.98275e+06	1.79676e+06	1.83778e+06	1.79717e+06	1.85136e+06
M120T87	120.066	87.4	1.5	5.87208e+07	1.02116e+08	1.03579e+08	1.41852e+08	3.26718e+07	6.98246e+07	1.09974e+08	1.39691e+08	1.59251e+08	2.49063e+08	2.24889e+08	1.9013e+08	2.75283e+08	1.44083e+08	3.07079e+08	2.9241e+08	1.9957e+08	1.76152e+08	2.9051e+08	1.67432e+08	1.65585e+08	1.59972e+08	1.4031e+08	1.91168e+08	1.11594e+08	1.11377e+08	1.11632e+08	1.1179e+08	1.23267e+08	1.12383e+08	1.61114e+08
M121T124	121.051	124.2	2.1	3.67738e+06	9.71117e+06	8.62711e+06	9.91589e+06	9.20768e+06	7.78106e+06	1.05718e+07	9.981e+06	1.08303e+07	1.06573e+07	1.04202e+07	1.24843e+07	9.57384e+06	1.05265e+07	8.83665e+06	1.13816e+07	1.24538e+07	1.32131e+07	1.43864e+07	9.79588e+06	9.45543e+06	9.53675e+06	4.68729e+06	1.16296e+07	9.63129e+06	6.68584e+06	9.60452e+06	9.69851e+06	7.09128e+06	9.60995e+06	9.57871e+06
M121T133	121.051	133.5	2.2	1.05325e+06	1.89619e+06	1.56006e+06	1.35664e+06	218193	540871	1.55477e+06	1.41651e+06	827993	529624	388667	1.32445e+06	1.37991e+06	928467	938927	976528	1.17194e+06	1.18273e+06	661314	695570	588514	159247	281673	1.25036e+06	1.2611e+06	1.40409e+06	1.40227e+06	1.4158e+06	1.40255e+06	1.36394e+06	1.36493e+06
M121T338_1	121.065	338.2	5.6	2.68026e+06	1.60213e+06	2.55974e+06	4.65828e+06	7.31254e+06	1.22025e+06	9.45162e+06	3.56068e+06	2.02539e+06	6.5229e+06	2.05906e+06	3.05427e+06	1.02396e+07	5.85403e+06	7.37727e+06	5.72631e+06	89517.6	2.82984e+06	5.05034e+06	2.49426e+06	3.06547e+06	1.46497e+06	2.16564e+06	3.5311e+06	3.96759e+06	3.97386e+06	3.97735e+06	3.97751e+06	4.14584e+06	4.41652e+06	4.18952e+06
M121T338_2	121.084	338.4	5.6	7.97899e+07	5.97762e+07	4.48797e+07	5.72821e+07	7.23028e+07	7.16033e+07	2.92095e+07	7.64495e+07	1.56591e+08	6.08716e+07	9.53525e+07	8.68853e+07	2.47354e+08	1.19858e+08	1.7088e+08	2.26667e+08	1.59679e+08	2.15957e+08	5.00097e+07	1.3684e+08	8.85848e+07	1.3021e+08	1.99715e+08	1.8034e+08	9.99575e+07	5.19229e+07	5.31623e+07	5.21474e+07	5.25932e+07	6.58016e+07	5.35026e+07
M121T90	121.07	90.4	1.5	1.8512e+07	1.43167e+07	1.64165e+07	1.24632e+07	1.71996e+07	1.10046e+07	1.509e+07	1.06999e+07	1.65063e+07	1.03124e+07	8.52397e+06	1.21887e+07	1.26962e+07	8.65146e+06	1.45383e+07	1.12539e+07	2.07523e+07	8.26884e+06	1.67627e+07	2.1267e+07	1.57537e+07	9.10723e+06	1.66355e+07	1.00386e+07	9.81573e+06	8.13801e+06	8.14238e+06	9.61136e+06	9.59478e+06	8.65238e+06	9.61486e+06
M122T338	122.088	338.4	5.6	2.02028e+06	1.77356e+06	2.00451e+06	1.41475e+06	1.73865e+06	1.67594e+06	2.17856e+06	2.38454e+06	2.40646e+06	2.30957e+06	2.66936e+06	1.94578e+06	1.69579e+06	2.06932e+06	1.86179e+06	1.70219e+06	2.22987e+06	2.31946e+06	2.13268e+06	2.64748e+06	2.14588e+06	2.53549e+06	1.93051e+06	2.47858e+06	1.92706e+06	1.95088e+06	1.92722e+06	1.92719e+06	2.04359e+06	1.92703e+06	1.95042e+06
M122T34	121.972	33.9	0.6	1.05207e+07	9.20588e+06	1.15948e+07	1.77799e+06	9.10175e+06	1.02316e+07	8.96944e+06	6.11241e+06	1.04723e+07	1.36761e+07	1.50132e+07	1.44365e+07	1.63459e+07	2.19446e+06	1.29697e+07	1.33308e+07	1.23813e+07	1.82243e+07	1.63301e+07	1.20447e+07	1.45661e+07	8.89416e+06	1.0204e+07	1.39293e+07	1.06319e+07	1.08079e+07	1.04497e+07	1.07475e+07	1.05693e+07	1.05626e+07	1.06767e+07
M122T381	122.097	380.8	6.3	891430	2.87658e+06	3.04192e+06	168429	898344	1.44373e+06	3.33227e+06	2.87536e+06	1.66425e+06	1.15179e+06	3.13289e+06	2.29777e+06	2.54564e+06	3.00123e+06	2.61332e+06	2.5734e+06	2.33263e+06	2.47421e+06	117454	2.79735e+06	2.88852e+06	2.29681e+06	2.83565e+06	2.64615e+06	2.54545e+06	2.61e+06	2.67743e+06	2.7943e+06	3.01854e+06	2.60768e+06	2.6122e+06
M122T65	121.972	64.6	1.1	2.12319e+07	1.24439e+07	1.1235e+07	1.86552e+07	9.99116e+06	1.63335e+07	1.66502e+07	1.20343e+07	1.50488e+07	2.53686e+07	1.7563e+07	1.27179e+07	1.26153e+07	1.4062e+07	1.43923e+07	1.34952e+07	1.67604e+07	8.76512e+06	2.15071e+07	1.86242e+07	1.68263e+07	1.25853e+07	1.81334e+07	1.22956e+07	1.52825e+07	1.2488e+07	1.26146e+07	1.37508e+07	1.25037e+07	1.24738e+07	1.24883e+07
M123T122	123.055	121.8	2	6.66626e+09	7.01163e+09	5.03639e+09	7.34484e+09	6.43031e+09	3.29469e+09	3.43916e+09	4.68031e+09	4.57685e+09	3.6101e+09	5.16541e+09	5.0062e+09	2.00052e+09	4.29822e+09	3.07592e+09	2.81411e+09	5.56997e+09	3.04671e+09	7.19335e+09	6.21291e+09	4.58039e+09	3.47373e+09	2.70326e+09	4.20626e+09	3.68637e+09	4.04745e+09	3.77432e+09	3.48103e+09	4.0489e+09	4.04699e+09	4.50069e+09
M123T125	123.044	125	2.1	8.86928e+06	2.76139e+07	7.17899e+06	1.13298e+07	1.82921e+07	9.85189e+06	1.20979e+07	7.30172e+06	9.40347e+06	1.42774e+07	9.3594e+06	3.07535e+07	8.67846e+06	1.11496e+07	9.32478e+06	9.88198e+06	1.24152e+07	2.65068e+07	1.52646e+07	1.44221e+07	1.02342e+07	2.21998e+07	1.11485e+07	1.52347e+07	1.19892e+07	1.05693e+07	9.96663e+06	1.05306e+07	1.34245e+07	1.16015e+07	1.61209e+07
M123T139	123.044	139.5	2.3	3.95993e+06	3.47999e+06	3.96064e+06	2.68558e+06	5.3436e+06	2.47371e+06	4.3815e+06	3.25616e+06	6.70526e+06	1.2757e+07	1.00734e+07	9.21753e+06	7.93551e+06	1.12151e+07	1.33735e+07	1.29044e+07	8.57579e+06	9.47599e+06	9.08057e+06	8.22304e+06	9.94284e+06	9.99467e+06	9.00292e+06	1.03271e+07	9.14235e+06	8.83123e+06	8.79234e+06	8.78687e+06	8.79591e+06	1.04531e+07	8.80001e+06
M123T140	123.055	140.2	2.3	2.87926e+08	3.79976e+08	3.04705e+08	2.6817e+08	1.04928e+09	5.26395e+08	3.31225e+08	7.15925e+08	9.1028e+08	6.76307e+08	1.08189e+09	8.12798e+08	8.13485e+08	1.07693e+09	1.01628e+09	7.04492e+07	6.70907e+08	5.19753e+08	1.24989e+09	9.7701e+08	1.08887e+09	7.43054e+08	8.88636e+08	7.26703e+08	5.20978e+08	4.82879e+08	4.81234e+08	5.76002e+08	5.63375e+08	5.19281e+08	6.93388e+08
M123T191	123.044	190.8	3.2	7.82722e+06	5.571e+06	8.88156e+06	1.16615e+07	1.98226e+06	1.98293e+06	9.57182e+06	7.42899e+06	1.47889e+07	1.18357e+07	5.77037e+06	1.28845e+07	1.54047e+07	8.15385e+06	9.26897e+06	5.22367e+06	5.10822e+06	7.15378e+06	1.11098e+07	6.26532e+06	6.37593e+06	1.10159e+07	8.69632e+06	8.8765e+06	6.78601e+06	4.75677e+06	7.50577e+06	6.79913e+06	6.78786e+06	7.0625e+06	7.36584e+06
M123T33	123.044	33.4	0.6	361692	721868	623505	171711	350788	552307	633976	624150	767315	619531	415929	382616	557653	644479	205292	200053	266862	361611	509629	205412	401076	669182	319333	469625	525265	406649	584795	644916	783827	638625	661365
M123T472	123.054	472.3	7.9	1.5735e+07	2.10528e+07	4.19463e+07	2.14475e+07	2.12828e+07	2.47765e+07	3.50441e+07	2.09369e+07	2.33733e+07	3.36764e+07	3.60594e+07	2.61382e+07	4.48811e+07	4.96364e+07	3.08895e+07	2.78973e+07	2.72546e+07	3.89578e+07	2.52581e+07	2.13368e+07	2.5011e+07	2.14399e+07	2.67762e+07	5.32951e+07	2.1911e+07	1.85856e+07	2.02984e+07	2.47033e+07	2.05862e+07	2.09694e+07	1.57565e+07
M123T81	122.925	80.9	1.3	5.12355e+08	5.79246e+08	5.58813e+08	5.16796e+08	4.12716e+08	2.67538e+08	7.49791e+08	3.20003e+08	2.80727e+08	2.5289e+08	4.21502e+08	3.25041e+08	2.32477e+08	3.14188e+08	2.39606e+08	2.78546e+08	2.92111e+08	2.55735e+08	3.34709e+08	8.07595e+08	2.96347e+08	3.77823e+08	2.38248e+08	2.76869e+08	2.84085e+08	2.84079e+08	2.74513e+08	2.84829e+08	3.06809e+08	2.93864e+08	3.21792e+08
M124T122_1	124.039	121.7	2	5.47847e+06	4.66526e+06	1.99201e+07	1.85529e+07	7.79898e+06	1.53509e+07	1.36115e+07	3.26487e+06	7.06126e+06	8.72983e+06	6.9786e+06	3.7336e+06	1.04456e+07	2.95868e+06	8.69564e+06	9.1639e+06	5.12759e+06	1.14277e+07	6.26496e+06	1.3258e+07	4.25347e+06	2.82476e+06	7.6007e+06	1.38186e+07	5.60498e+06	5.53479e+06	5.93945e+06	5.67848e+06	7.00471e+06	6.77547e+06	6.79674e+06
M124T122_2	124.059	121.8	2	2.29158e+08	4.75916e+06	3.65416e+08	3.28343e+08	1.5252e+08	4.26883e+07	5.75608e+06	7.22848e+07	3.79354e+08	7.31728e+07	8.2142e+07	4.03232e+07	3.26056e+08	3.61356e+08	3.88802e+07	4.5107e+07	5.68914e+07	4.03628e+08	2.27091e+08	2.21951e+08	4.72174e+08	1.6542e+08	6.28207e+07	6.84555e+07	1.26583e+08	2.38832e+08	2.67937e+08	2.46775e+08	3.45955e+08	2.6224e+08	2.8234e+08
M124T140	124.059	140	2.3	656013	4.12953e+06	3.13426e+06	750058	2.92662e+06	1.28402e+06	3.8024e+07	2.4409e+07	8.85119e+07	1.36621e+08	8.84356e+07	1.00996e+08	8.10749e+07	8.30021e+07	1.72292e+08	1.55661e+08	7.88375e+06	5.89367e+07	6.86828e+06	9.25923e+06	3.47085e+07	8.49666e+07	9.58298e+06	7.18339e+07	2.84484e+07	2.73046e+07	3.62705e+07	3.2632e+07	3.58188e+07	3.79727e+07	3.5787e+07
M124T72_1	124.024	71.8	1.2	2.16628e+06	2.37136e+06	1.32607e+06	1.28716e+06	1.93477e+06	2.4621e+06	2.40553e+06	1.99673e+06	2.89066e+06	1.541e+06	1.85313e+06	1.65117e+06	3.39289e+06	2.56845e+06	2.02461e+06	1.94631e+06	2.42711e+06	1.94646e+06	2.4519e+06	1.23271e+06	3.13779e+06	878881	2.16844e+06	2.76146e+06	1.7169e+06	924323	1.28018e+06	911107	1.29637e+06	1.05719e+06	934551
M124T808	124.087	808.5	13.5	1.5916e+07	2.88421e+07	2.39267e+07	3.39743e+07	2.23818e+07	1.76842e+07	8.41118e+06	9.66695e+06	2.62656e+07	2.98226e+07	1.31062e+07	3.98215e+07	2.56212e+07	1.98987e+07	9.48777e+06	2.82973e+07	2.6594e+07	2.85295e+07	1.80967e+07	2.46728e+07	1.2325e+07	5.60787e+06	1.25845e+07	1.99197e+07	1.61834e+07	1.7827e+07	1.98203e+07	1.65492e+07	1.86866e+07	1.70091e+07	1.75655e+07
M124T81	123.928	80.9	1.3	1.5635e+06	5.34543e+06	3.07811e+06	2.33421e+06	2.60399e+06	1.87793e+06	3.95029e+06	2.61304e+06	3.50487e+06	3.1338e+06	3.77065e+06	3.3364e+06	2.76605e+06	3.63408e+06	3.02823e+06	2.86526e+06	2.75423e+06	4.73824e+06	4.78215e+06	3.63551e+06	3.66358e+06	3.02619e+06	2.84079e+06	3.81727e+06	2.94295e+06	3.04894e+06	3.04791e+06	3.12853e+06	3.05216e+06	3.20091e+06	3.36583e+06
M124T83_2	124.096	83.2	1.4	4.10242e+06	3.76428e+06	3.06696e+06	3.5841e+06	3.39076e+06	4.21616e+06	4.64567e+06	3.2683e+06	2.80203e+06	3.37821e+06	2.57059e+06	2.9526e+06	2.78825e+06	3.52509e+06	2.31098e+06	2.8975e+06	2.68312e+06	2.50941e+06	3.32796e+06	4.57939e+06	2.75767e+06	3.35635e+06	2.7827e+06	3.30741e+06	4.09182e+06	4.10536e+06	4.09033e+06	3.96803e+06	4.09157e+06	4.03794e+06	3.78905e+06
M124T91	123.989	91.5	1.5	795092	795370	882461	754041	907398	776739	680493	869778	810837	961572	879945	754177	808791	852755	233936	850855	946665	798717	823914	716614	795809	972104	896124	867981	721647	755964	738616	755955	760004	755760	692177
M125T122	125.06	121.9	2	8.21324e+06	7.28908e+06	8.52531e+06	3.71169e+06	7.46737e+06	3.552e+06	8.43386e+06	4.00125e+06	1.11784e+07	5.7587e+06	8.71768e+06	1.00603e+07	1.08629e+07	6.13903e+06	6.92044e+06	6.41565e+06	1.00324e+07	1.93159e+07	1.50718e+07	5.89022e+06	8.86173e+06	5.78743e+06	8.23871e+06	9.60819e+06	7.7095e+06	7.80873e+06	8.09746e+06	8.76528e+06	8.02542e+06	7.81684e+06	7.81127e+06
M125T344	125.071	344.1	5.7	1.46025e+06	464555	284581	2.07115e+06	1.55613e+06	1.7976e+06	467747	490853	1.17629e+06	3.27333e+06	491234	578810	770030	585068	556608	450909	456438	505114	1.45728e+06	638762	421041	2.81286e+06	625784	351159	1.74148e+06	1.35835e+06	1.75214e+06	1.61303e+06	1.63001e+06	1.72973e+06	1.95726e+06
M125T72	125.038	71.7	1.2	5.22641e+06	1.91231e+07	1.49028e+07	4.88282e+06	1.02723e+07	7.11498e+06	1.06896e+07	4.25609e+06	1.35033e+07	2.11578e+07	1.02724e+07	1.40521e+07	1.74552e+07	1.19699e+07	4.40358e+06	5.5173e+06	3.54649e+06	1.1085e+07	3.24561e+06	1.32256e+07	8.64203e+06	8.23759e+06	4.28567e+06	1.60154e+07	1.55045e+07	1.25854e+07	1.51323e+07	1.23419e+07	1.328e+07	1.40608e+07	1.30021e+07
M125T81	124.923	80.9	1.3	1.57641e+07	2.25929e+07	7.29959e+07	1.50683e+07	1.84964e+07	1.98068e+07	2.29358e+07	5.14041e+07	2.16386e+07	5.07976e+07	2.28725e+07	2.33139e+07	2.29246e+07	2.50313e+07	3.79733e+07	4.47824e+07	1.20264e+08	2.12293e+07	1.00142e+08	1.13287e+08	9.93742e+07	2.41276e+07	1.88683e+07	7.77364e+07	4.54436e+07	4.54108e+07	4.45983e+07	4.47044e+07	5.53675e+07	3.18745e+07	3.11776e+07
M126T114_1	126.022	113.6	1.9	1.89006e+06	2.91594e+07	3.17051e+07	788414	1.63226e+06	3.08306e+06	2.74363e+07	1.00757e+07	3.32815e+06	2.0655e+06	2.79431e+07	5.477e+06	2.9176e+07	2.42884e+07	6.03222e+06	5.36757e+06	2.09709e+07	1.77105e+07	676995	6.51699e+06	1.72785e+07	3.72679e+06	2.62846e+07	2.65531e+07	2.05516e+07	1.48987e+07	2.00521e+07	1.32461e+07	2.01325e+07	1.96051e+07	2.01816e+07
M126T114_2	126.055	114.2	1.9	251994	490573	551136	265711	3.49073e+06	6.56197e+06	3.04677e+06	2.42967e+06	6.2834e+06	3.4636e+06	610345	2.7518e+06	353349	472259	231724	429498	127624	450007	4.32697e+06	149421	270360	3.55191e+06	238908	49937.2	3.50596e+06	3.50329e+06	3.50437e+06	3.38357e+06	4.09649e+06	3.59883e+06	3.59984e+06
M126T127	126.022	127.4	2.1	1.77875e+07	7.7797e+06	1.28646e+07	1.86463e+07	1.46472e+07	1.15225e+07	1.70258e+07	1.46732e+07	1.65714e+07	2.41567e+07	1.95006e+07	1.16918e+07	1.34072e+07	2.22014e+07	9.64609e+06	1.50134e+07	2.14239e+07	2.64395e+07	6.97944e+06	1.49092e+07	2.11776e+07	1.92314e+07	3.56835e+07	1.04204e+07	9.81937e+06	1.52343e+07	1.469e+07	1.74247e+07	1.39714e+07	1.32701e+07	1.39681e+07
M126T315	126.037	314.8	5.2	4.8661e+06	5.52887e+06	4.47853e+06	7.16829e+06	4.54916e+06	2.69468e+06	4.65281e+06	5.06481e+06	6.32514e+06	8.01738e+06	7.94408e+06	9.4063e+06	1.05498e+07	9.63179e+06	1.18618e+07	1.08786e+07	6.35659e+06	1.64481e+07	1.20704e+07	8.97801e+06	1.24077e+07	1.00502e+07	1.059e+07	1.16636e+07	8.17485e+06	8.1746e+06	8.17566e+06	8.23565e+06	8.2416e+06	8.59332e+06	8.17504e+06
M126T634	125.985	633.9	10.6	6.34054e+06	6.0855e+06	4.93194e+06	4.53268e+06	4.57392e+06	4.09933e+06	5.06249e+06	4.14288e+06	6.90452e+06	1.10448e+07	6.95498e+06	9.39159e+06	6.24043e+06	4.11222e+06	3.43402e+06	7.59742e+06	8.91762e+06	5.97751e+06	1.88738e+06	6.19021e+06	5.73816e+06	5.84495e+06	3.24977e+06	1.04488e+07	4.00411e+06	5.83014e+06	5.84017e+06	5.84004e+06	5.82966e+06	5.42357e+06	5.50546e+06
M126T65	126.055	65.1	1.1	7.90039e+06	7.2087e+06	7.81384e+06	7.54702e+06	7.71396e+06	8.35676e+06	6.40064e+06	6.67409e+06	7.0166e+06	6.7413e+06	8.76582e+06	7.48344e+06	8.96279e+06	8.60832e+06	6.78232e+06	6.24186e+06	7.91111e+06	6.83915e+06	7.02362e+06	4.42826e+06	7.82118e+06	7.54872e+06	6.85069e+06	6.55884e+06	6.85664e+06	6.59434e+06	7.56748e+06	7.06188e+06	7.07247e+06	7.0746e+06	6.12697e+06
M126T72	125.986	72.2	1.2	1.44915e+08	1.45846e+08	1.50756e+08	1.37332e+08	1.35354e+08	1.52768e+08	1.68276e+08	8.8698e+07	1.47687e+08	1.39961e+08	1.41822e+08	1.57327e+08	1.4307e+08	1.56914e+08	1.56476e+08	1.34927e+08	1.46614e+08	1.37896e+08	1.4922e+08	1.48366e+08	1.31982e+08	1.58881e+08	1.2029e+08	1.52591e+08	1.45379e+08	1.41275e+08	1.14173e+08	1.43512e+08	1.45514e+08	1.41156e+08	1.4534e+08
M126T75	126.102	74.7	1.2	1.91966e+08	1.17167e+08	1.87278e+08	1.08744e+08	2.07864e+08	1.5022e+08	1.35639e+08	1.42136e+08	1.41298e+08	1.94665e+08	2.02719e+08	1.88205e+08	2.2615e+08	1.01057e+08	1.32504e+08	1.05101e+08	1.97161e+08	8.93897e+07	1.98877e+08	1.38097e+08	9.26513e+07	1.75447e+08	1.44385e+08	1.91848e+08	1.43975e+08	1.43978e+08	1.59046e+08	1.44138e+08	1.39257e+08	1.30768e+08	1.30118e+08
M126T86	126.022	85.7	1.4	9.60361e+08	1.48229e+09	1.22884e+09	8.51097e+08	1.2695e+09	1.16918e+09	1.12501e+09	8.08131e+08	4.6358e+08	1.34737e+08	7.38626e+08	1.35799e+09	1.24407e+09	9.34072e+08	1.26746e+09	6.45709e+08	8.96631e+08	6.80785e+08	1.06409e+09	6.06215e+08	1.33987e+08	5.76231e+08	1.52357e+09	7.67583e+08	1.2453e+09	1.29972e+09	1.28425e+09	8.43984e+08	1.14234e+09	1.29633e+09	1.38846e+09
M126T99	126.022	99.4	1.7	5.78997e+07	6.86677e+07	5.59681e+07	6.60988e+07	5.4708e+07	7.7284e+07	7.74051e+07	7.25856e+07	8.69812e+07	7.49271e+07	1.04099e+08	7.18641e+07	4.74562e+07	6.30668e+07	6.70634e+07	6.93188e+07	6.57008e+07	1.15785e+07	6.43992e+07	8.07479e+07	7.33628e+07	8.99233e+07	6.70575e+07	6.27711e+07	7.33856e+07	7.32231e+07	7.30523e+07	6.90242e+07	3.00787e+07	7.30272e+07	7.31425e+07
M127T101_1	127.016	100.6	1.7	7.57802e+06	2.67446e+06	7.13325e+06	4.39001e+06	5.10159e+06	4.02295e+06	7.58967e+06	7.89622e+06	3.83312e+06	2.64868e+06	3.54997e+06	4.12329e+06	2.70516e+06	2.28435e+06	5.05495e+06	4.7273e+06	3.07555e+06	3.70882e+06	4.80144e+06	2.75519e+06	3.79314e+06	2.90197e+06	4.19174e+06	4.99753e+06	2.84699e+06	3.83785e+06	2.84047e+06	2.72834e+06	3.02866e+06	3.86455e+06	2.84624e+06
M127T101_2	127.039	101.1	1.7	1.60847e+07	1.01239e+07	1.32224e+07	2.94013e+06	4.69889e+06	2.97469e+06	1.54986e+07	2.21652e+06	2.3267e+07	2.91071e+07	3.50444e+07	3.76939e+07	2.12238e+07	2.93937e+07	3.36351e+07	4.51321e+07	2.32484e+07	1.85977e+07	2.16173e+07	4.95051e+06	3.4281e+06	1.99181e+07	1.82246e+07	2.17282e+07	9.76989e+06	1.76604e+07	1.75176e+07	2.23539e+07	2.54313e+07	1.75137e+07	1.94758e+07
M127T135	127.039	135.5	2.3	3.56998e+07	2.91064e+07	3.23632e+07	3.45166e+07	4.0198e+07	4.72526e+07	3.96303e+07	3.78734e+07	4.14412e+07	4.0857e+07	4.57757e+07	4.22496e+07	4.28475e+07	3.83685e+07	4.1793e+07	3.75521e+07	4.51351e+07	5.57076e+07	4.37972e+07	4.44159e+07	3.42008e+07	3.79318e+07	3.59883e+07	3.27183e+07	3.73747e+07	3.73529e+07	3.46756e+07	3.87753e+07	3.87054e+07	3.87188e+07	4.09728e+07
M127T244	127.05	244.2	4.1	2.83011e+06	3.01523e+06	2.78755e+06	2.86755e+06	3.17165e+06	2.9907e+06	3.00972e+06	3.74787e+06	3.96853e+06	3.26516e+06	3.4837e+06	3.64539e+06	4.09678e+06	3.2945e+06	3.86474e+06	691044	3.06804e+06	3.79756e+06	3.4976e+06	3.64795e+06	3.6436e+06	3.49338e+06	4.00535e+06	4.10164e+06	3.18679e+06	2.78237e+06	3.50509e+06	3.2487e+06	3.46093e+06	3.45383e+06	3.2394e+06
M127T335	127.05	335	5.6	2.84773e+06	9.63435e+06	6.46031e+06	6.74439e+06	2.8302e+06	7.30637e+06	5.42797e+06	2.38456e+06	8.74533e+06	9.18694e+06	1.00998e+07	1.16643e+07	8.67426e+06	1.01984e+07	1.23462e+07	9.71194e+06	2.55646e+06	1.02897e+07	2.2096e+06	7.38759e+06	2.66744e+06	3.25061e+06	2.76135e+06	1.03767e+07	8.19191e+06	8.1842e+06	7.78386e+06	8.15095e+06	4.05427e+06	8.04448e+06	7.78464e+06
M127T552	127.112	551.9	9.2	451169	1.7989e+06	2.15912e+06	562370	26314.7	33696.5	2.42336e+06	2.38733e+06	84906.6	30536.8	1.77561e+06	1.0835e+06	3.54533e+06	2.63187e+06	1.88957e+06	2.28748e+06	873638	1.85824e+06	764032	3.42393e+06	751690	68040.1	1.74916e+06	1.8568e+06	2.46093e+06	2.08735e+06	2.27423e+06	1.88561e+06	2.45216e+06	2.13747e+06	1.64924e+06
M127T604	127.016	603.6	10.1	215489	374226	538387	323155	195867	82696	218269	265872	39634.8	164156	160319	436996	861251	280463	152361	159599	71995.3	87667.4	363997	176772	297368	329290	246575	213813	180163	197017	104484	241733	233538	233217	232788
M127T682	127.112	681.6	11.4	402277	969409	1.55316e+06	630026	1.82949e+06	3.18139e+06	1.24866e+06	904204	1.45894e+06	236656	1.02775e+06	2.568e+06	1.38989e+06	248584	1.17032e+06	912102	107721	304907	158634	252229	69023.3	1.22393e+06	981099	14143.9	535404	940783	600075	630683	472961	530492	498578
M127T72_1	126.595	72.4	1.2	631675	448956	455883	494361	904888	4.03574e+06	463791	1.74194e+06	1.06483e+06	1.70395e+06	1.07982e+06	1.57081e+06	1.73797e+06	1.06677e+06	1.99968e+06	491184	3.4937e+06	1.71752e+06	1.53455e+06	1.70422e+06	1.39171e+06	1.53876e+06	490999	1.63313e+06	1.54429e+06	1.11324e+06	1.26999e+06	1.5841e+06	1.52012e+06	721914	1.51367e+06
M127T72_2	126.99	72.3	1.2	5.55091e+06	6.65114e+06	5.42336e+06	4.67287e+06	4.55311e+06	5.58907e+06	5.02891e+06	5.86645e+06	4.54965e+06	4.43103e+06	3.56777e+06	2.84633e+06	6.77862e+06	4.94005e+06	3.88939e+06	6.25798e+06	6.23281e+06	7.70738e+06	4.7965e+06	4.60986e+06	6.05628e+06	4.99613e+06	3.33763e+06	5.78557e+06	4.40653e+06	4.49253e+06	4.49292e+06	4.88121e+06	4.42609e+06	4.53666e+06	4.28773e+06
M127T72_3	127.003	71.6	1.2	3.29127e+06	3.72235e+06	2.97003e+06	3.29227e+06	3.28861e+06	2.88125e+06	3.29057e+06	1.96679e+06	2.42139e+06	2.8321e+06	2.98123e+06	2.71785e+06	2.17378e+06	1.93161e+06	2.36193e+06	2.42183e+06	2.96195e+06	2.32232e+06	2.6764e+06	2.84242e+06	2.77383e+06	2.38045e+06	2.48229e+06	2.6544e+06	2.33861e+06	1.70162e+06	1.8514e+06	1.90857e+06	2.16667e+06	2.17231e+06	1.99988e+06
M127T740	126.972	740.3	12.3	3.60348e+06	4.52176e+06	2.91458e+06	2.65764e+06	4.00225e+06	2.50874e+06	6.54911e+06	2.74709e+06	3.01699e+06	6.71054e+06	6.89379e+06	2.55198e+06	4.21182e+06	3.86647e+06	3.98966e+06	3.68137e+06	2.52466e+06	2.78035e+06	3.95203e+06	7.07628e+06	6.97805e+06	3.37567e+06	1.81683e+06	2.77712e+06	4.41488e+06	3.40775e+06	3.07908e+06	3.42084e+06	4.46432e+06	3.01303e+06	2.24604e+06
M127T75	127.106	74.7	1.2	1.32101e+07	8.55264e+06	1.26628e+07	6.07311e+06	1.05889e+07	1.0814e+07	1.41016e+07	9.9149e+06	1.19715e+07	7.51165e+06	1.72272e+07	1.17223e+07	3.68113e+06	9.57527e+06	6.00561e+06	5.71906e+06	1.02495e+07	3.41915e+06	4.45014e+06	7.68087e+06	8.13217e+06	1.44699e+07	6.10188e+06	8.09437e+06	8.86399e+06	9.15501e+06	8.81118e+06	9.10668e+06	9.0871e+06	8.87941e+06	9.38748e+06
M127T751	126.972	751.5	12.5	7.40623e+06	5.52519e+06	3.88749e+06	3.7644e+06	5.92849e+06	3.01076e+06	3.54246e+06	2.24281e+06	1.59427e+07	9.7722e+06	1.37901e+07	1.01136e+07	1.18199e+07	8.7764e+06	1.31107e+07	7.77964e+06	4.55984e+06	9.66182e+06	3.99348e+06	1.68995e+06	2.5099e+06	1.4811e+07	6.91053e+06	7.08059e+06	8.84461e+06	8.39202e+06	7.93353e+06	5.18965e+06	8.63198e+06	9.27773e+06	8.04972e+06
M127T763	126.972	763	12.7	4.4158e+06	4.98756e+06	5.3329e+06	4.90719e+06	5.41678e+06	3.35059e+06	5.37208e+06	4.51174e+06	5.74942e+06	7.46421e+06	5.11436e+06	7.36376e+06	7.03422e+06	5.67026e+06	8.39783e+06	3.29235e+06	6.00866e+06	7.73675e+06	6.81285e+06	3.26197e+06	3.12346e+06	4.08159e+06	9.03663e+06	5.27583e+06	5.30858e+06	5.40314e+06	5.54694e+06	5.38932e+06	3.25548e+06	5.54904e+06	5.54778e+06
M127T774	126.972	774.3	12.9	1.31501e+07	1.2153e+07	1.6679e+07	1.87533e+07	1.47019e+07	1.35744e+07	6.91808e+06	1.41728e+07	1.9364e+07	8.96406e+06	8.45633e+06	8.37266e+06	1.92508e+07	8.02513e+06	1.42866e+07	1.79867e+07	6.60091e+06	2.17352e+07	2.07883e+07	1.33544e+07	1.45774e+07	1.21967e+07	1.69164e+07	9.21212e+06	1.05546e+07	1.12172e+07	1.12108e+07	9.83517e+06	1.12843e+07	9.8822e+06	1.04193e+07
M127T807	126.972	807	13.4	612543	1.267e+06	3.02239e+06	3.26694e+06	1.12488e+06	870071	1.63618e+06	1.9632e+06	2.98298e+06	2.16908e+06	2.68545e+06	3.07016e+06	1.12766e+06	4.19182e+06	1.75253e+06	2.37834e+06	1.87931e+06	2.22553e+06	1.80289e+06	2.59454e+06	1.91692e+06	2.06404e+06	1.41562e+06	1.58145e+06	1.80595e+06	1.37238e+06	1.80346e+06	1.48267e+06	1.93249e+06	1.80824e+06	1.70745e+06
M127T86	127.025	85.7	1.4	5.24342e+07	4.14844e+07	5.15476e+07	3.74376e+07	3.30315e+07	3.74111e+07	5.62997e+07	5.73379e+07	3.52345e+07	4.75386e+07	4.61358e+07	4.45082e+07	3.11472e+07	3.67348e+07	3.23732e+07	3.19213e+07	3.69021e+07	2.79295e+07	3.72522e+07	3.20171e+07	2.93431e+07	3.9931e+07	5.25025e+07	3.59677e+07	2.76779e+07	2.68241e+07	2.63673e+07	2.76468e+07	2.99432e+07	2.71382e+07	2.76497e+07
M127T89	127.039	88.8	1.5	1.82467e+07	9.44168e+06	1.46178e+07	1.26746e+07	1.26654e+07	1.22129e+07	1.70501e+07	1.51513e+07	1.57252e+07	1.78492e+07	1.64027e+07	1.48178e+07	1.57797e+07	1.80231e+07	1.89601e+07	1.90526e+07	1.93115e+07	1.72035e+07	1.53306e+07	2.01792e+07	2.09484e+07	1.78441e+07	1.6386e+07	1.86512e+07	1.72166e+07	1.68548e+07	1.7207e+07	1.72112e+07	1.68532e+07	1.72648e+07	1.41354e+07
M128T36	128.043	36	0.6	874612	1.22596e+06	1.45044e+06	1.67955e+06	1.81224e+06	1.59105e+06	1.43215e+06	2.13395e+06	748149	2.25018e+06	1.38897e+06	2.82256e+06	955681	1.04541e+06	2.38487e+06	1.08251e+06	1.66506e+06	1.15729e+06	1.43406e+06	1.8699e+06	1.68735e+06	1.72263e+06	1.35718e+06	2.62779e+06	1.24184e+06	1.51698e+06	1.2608e+06	1.25186e+06	1.31633e+06	1.52642e+06	1.42659e+06
M128T364	128.143	364.5	6.1	4.08853e+06	1.17358e+06	1.41841e+06	2.88721e+06	2.04275e+06	1.07568e+06	2.16278e+06	2.569e+06	2.14846e+06	3.87783e+06	2.85606e+06	3.09687e+06	6.46207e+06	3.83002e+06	3.12019e+06	2.64066e+06	4.41342e+06	4.36567e+06	2.29829e+06	3.01371e+06	3.37476e+06	3.05475e+06	3.73175e+06	2.47915e+06	1.36629e+06	2.69699e+06	3.13135e+06	2.67162e+06	3.04051e+06	3.03936e+06	3.15055e+06
M128T606	128.096	606	10.1	663835	352572	321194	384357	392281	540162	688944	520301	259872	610769	325341	567179	609109	339633	531037	288775	319228	417365	546045	854363	149934	451817	192121	501801	349076	335261	658472	370574	397539	341044	490526
M128T72	128.019	71.8	1.2	2.85909e+08	3.19339e+08	3.50992e+08	3.06652e+08	2.95486e+08	2.06996e+08	9.63482e+07	3.18068e+08	2.93216e+08	3.86243e+08	5.02382e+08	2.85738e+08	2.40336e+08	3.22196e+08	2.27149e+08	2.52852e+08	2.89728e+08	3.30394e+08	2.94896e+08	4.49903e+08	2.28137e+08	4.09612e+08	2.60841e+08	3.80165e+08	2.05051e+08	2.96659e+08	2.96108e+08	3.1001e+08	3.0919e+08	3.10879e+08	3.23714e+08
M128T86	128.018	85.7	1.4	3.9655e+07	6.31255e+07	4.40014e+07	4.92091e+07	4.11363e+07	4.48278e+07	4.87773e+07	4.03096e+07	4.19172e+07	1.73354e+07	4.06845e+07	5.99423e+07	4.67337e+07	4.09621e+07	4.05459e+07	4.16472e+07	4.02424e+07	4.87939e+07	4.83234e+07	4.39811e+07	2.49062e+07	3.69805e+07	5.16845e+07	3.95613e+07	5.69955e+07	5.70257e+07	5.73304e+07	5.7017e+07	5.82794e+07	5.83757e+07	5.82965e+07
M129T104_1	129.055	104.2	1.7	1.32096e+07	9.49406e+06	1.3381e+07	7.57685e+06	3.62934e+06	8.70454e+06	2.21574e+07	1.32344e+07	3.70579e+06	1.20295e+07	9.74107e+06	9.57674e+06	6.43832e+06	1.08158e+07	1.04962e+07	8.55787e+06	1.02363e+07	1.51369e+07	1.98203e+07	9.62839e+06	1.15945e+07	1.07489e+07	1.05139e+07	1.09924e+07	9.00179e+06	8.58602e+06	8.59855e+06	9.03593e+06	9.69254e+06	7.30109e+06	8.99968e+06
M129T104_2	129.074	104.2	1.7	860760	1.04966e+06	650854	599379	1.9142e+06	287892	1.3989e+06	759836	1.19383e+06	1.02638e+06	1.56044e+06	1.58852e+06	2.46779e+06	739199	1.03777e+06	888602	2.01482e+06	1.85046e+06	3.12605e+06	1.86662e+06	991033	749227	1.24359e+06	855913	1.23501e+06	1.17868e+06	991198	1.23773e+06	1.22958e+06	1.18433e+06	1.23061e+06
M129T137	128.951	137	2.3	79616.9	129068	199665	57641.8	54580.7	65119.7	159114	197822	767781	758938	598715	611936	723588	766748	885872	909991	150854	845577	261741	193429	254064	473896	774531	521979	375744	403449	404206	367062	375690	366675	366399
M129T240	129.055	240.4	4	2.59629e+07	2.22278e+07	2.51837e+07	2.55644e+07	2.81435e+07	2.68431e+07	3.67155e+07	4.18311e+07	3.61937e+06	3.35244e+07	2.79305e+07	3.18347e+07	2.97791e+07	2.68761e+07	3.3468e+07	2.27584e+07	1.91171e+07	2.72454e+07	3.40324e+07	2.82494e+07	2.05641e+07	2.22165e+07	3.06203e+07	2.10719e+07	2.27351e+07	2.2599e+07	2.32974e+07	2.45877e+07	2.4507e+07	2.45183e+07	2.59337e+07
M129T260	129.055	259.9	4.3	2.27476e+07	1.86123e+07	2.11348e+07	5.36714e+06	2.72525e+07	4.97533e+07	1.90355e+07	1.80528e+07	1.82978e+07	1.9515e+07	1.47571e+07	1.83466e+07	4.78486e+07	1.43225e+07	7.18563e+07	1.49029e+07	3.50166e+06	2.04037e+07	3.22214e+07	6.50913e+06	2.48827e+07	4.32037e+07	1.49246e+07	2.9543e+07	1.81975e+07	2.09752e+07	2.75469e+07	2.10728e+07	3.65789e+07	3.15219e+07	2.20161e+07
M129T404	129.055	404.1	6.7	1.57278e+06	432439	9.37077e+06	6.53995e+06	1.5948e+06	1.7241e+06	1.59898e+06	6.04172e+06	1.37284e+07	3.22882e+06	4.07623e+06	2.15026e+06	1.71955e+06	3.87526e+06	558976	7.90367e+06	4.83291e+06	749519	2.9988e+06	3.65108e+06	6.92372e+06	920370	7.08408e+06	532154	3.35737e+06	1.61683e+06	3.06624e+06	1.85776e+06	3.68191e+06	3.06678e+06	3.53974e+06
M129T428	129.102	427.6	7.1	2.25925e+06	2818.33	13512.2	2.01785e+06	1.62256e+06	1.90916e+06	6452.6	5625.79	2.43819e+06	1.36298e+06	53878.6	86445.8	14136.2	58548.2	57922.3	53648.1	11454.3	48824	1.68395e+06	8199.56	162040	1.54668e+06	17187.8	14603.5	835792	848642	909905	837865	837945	851178	899946
M129T599	129.127	598.7	10	960060	2.10137e+06	2.03049e+06	813592	2.20809e+06	2.59126e+06	5.57187e+06	1.72977e+06	1.626e+06	4.37177e+06	1.37999e+06	1.2114e+06	7.79961e+06	1.93529e+06	1.87012e+06	1.55932e+06	2.65345e+06	8.39058e+06	3.07467e+06	1.68877e+06	2.89864e+06	1.70898e+06	2.41122e+06	1.80417e+06	2.59606e+06	2.58882e+06	2.86575e+06	2.58241e+06	2.86774e+06	2.97251e+06	2.61889e+06
M129T67	129.139	66.9	1.1	703637	1.13099e+06	949270	901862	921317	831644	479362	1.02929e+06	795512	729451	749269	819024	954273	857115	730228	774481	943771	778440	851593	956731	632484	366040	910131	810106	1.14469e+06	1.14552e+06	1.10738e+06	1.09999e+06	1.14515e+06	1.12672e+06	1.28366e+06
M129T72	129.02	71.7	1.2	1.4112e+07	2.93142e+07	4.58908e+07	1.44075e+07	1.18958e+07	2.28181e+07	1.2535e+07	6.21525e+07	3.04836e+07	9.63925e+06	4.92276e+07	8.32978e+06	3.30281e+07	1.59334e+07	4.41452e+07	1.19385e+07	7.02258e+07	4.76937e+07	7.67873e+06	4.01557e+07	5.188e+07	5.13277e+07	7.32659e+06	6.39628e+07	3.94054e+07	4.2074e+07	3.97644e+07	3.93599e+07	1.74344e+07	3.74244e+07	3.40366e+07
M129T76	129.102	76.3	1.3	5.9316e+06	7.21027e+06	7.40007e+06	8.33103e+06	6.27985e+06	6.85402e+06	8.62644e+06	9.92856e+06	7.56801e+06	7.70792e+06	7.5441e+06	7.18697e+06	6.72901e+06	6.76583e+06	7.29281e+06	6.62322e+06	7.54322e+06	5.39851e+06	7.32887e+06	7.53332e+06	7.46959e+06	8.68829e+06	8.82643e+06	7.30505e+06	6.94302e+06	6.74311e+06	8.94158e+06	6.85617e+06	6.88922e+06	8.78786e+06	6.89266e+06
M129T818	129.127	817.7	13.6	4.52192e+06	989882	4.53005e+06	2.8925e+06	3.91009e+06	2.4695e+06	3.07597e+06	7.4486e+06	8.40895e+06	6.25458e+06	7.39158e+06	6.24784e+06	4.20818e+06	2.93063e+06	7.66654e+06	6.61698e+06	9.32765e+06	1.30175e+07	4.76042e+06	8.8784e+06	3.20554e+06	5.50964e+06	9.90321e+06	6.55311e+06	6.87506e+06	6.24945e+06	4.74581e+06	7.24512e+06	7.29755e+06	4.64625e+06	6.96719e+06
M130T100	130.05	99.9	1.7	5.796e+07	4.6362e+07	5.2395e+07	7.2014e+07	4.93777e+07	5.73899e+07	6.40046e+07	8.11115e+07	4.73383e+07	3.83147e+07	4.61947e+07	3.83452e+07	4.31612e+07	4.73459e+07	5.77006e+07	5.67567e+07	5.39791e+07	4.04661e+07	5.29193e+07	5.1757e+07	4.69143e+07	6.59251e+07	5.65069e+07	4.522e+07	4.7334e+07	4.98701e+07	4.60617e+07	4.73385e+07	4.6017e+07	4.59448e+07	4.29833e+07
M130T121	130.086	120.9	2	2.51662e+07	2.09084e+07	1.80316e+07	2.52356e+07	2.07502e+07	2.3991e+07	2.4128e+07	3.23213e+07	2.97652e+07	2.12275e+07	1.92785e+07	3.25531e+07	3.59799e+07	3.96985e+07	3.63134e+07	6.29871e+07	2.42181e+07	4.40389e+07	2.66484e+07	1.95902e+07	2.38528e+07	3.06171e+07	2.41274e+07	2.05627e+07	2.18621e+07	2.17859e+07	2.13121e+07	2.16633e+07	1.92564e+07	1.32274e+07	1.2769e+07
M130T123	130.05	122.7	2	1.39932e+08	8.34686e+07	4.99744e+07	1.02509e+08	1.21908e+08	6.06147e+07	1.16707e+08	6.18571e+07	5.74259e+07	5.99134e+07	4.50169e+07	6.34654e+07	4.62591e+07	4.58532e+07	4.47e+07	3.92026e+07	4.3569e+07	4.12816e+07	6.06366e+07	4.44751e+07	4.32576e+07	8.87803e+07	4.45572e+07	3.22068e+07	9.38153e+07	9.24822e+07	9.24831e+07	9.24932e+07	9.36807e+07	8.45913e+07	9.36883e+07
M130T155	130.05	155.2	2.6	1.13985e+07	1.68719e+08	1.79749e+08	7.51078e+06	1.18576e+07	3.50938e+07	3.07662e+07	1.71178e+08	2.95308e+07	1.37889e+07	8.12731e+07	1.31417e+08	2.40828e+08	6.61962e+07	1.39663e+08	1.37525e+08	7.34343e+07	7.02099e+07	7.06389e+06	1.33831e+08	3.68878e+07	2.26741e+07	6.32946e+07	1.46736e+08	1.29235e+08	6.81982e+07	1.29051e+08	1.29201e+08	1.28688e+08	1.28916e+08	7.90202e+07
M130T260	130.059	259.6	4.3	970925	1.08694e+06	1.19822e+06	1.01662e+06	1.29556e+06	1.27077e+06	1.20564e+06	1.07957e+06	1.43001e+06	1.21708e+06	1.32012e+06	1.31887e+06	1.60147e+06	1.16347e+06	1.24741e+06	1.24535e+06	1.1853e+06	1.52762e+06	1.34311e+06	1.23019e+06	1.23349e+06	1.14268e+06	1.43903e+06	1.49457e+06	1.38214e+06	1.28035e+06	1.37537e+06	1.31726e+06	1.37348e+06	1.37171e+06	1.31629e+06
M130T397	130.065	397.2	6.6	2.41115e+06	6.49018e+06	1.8607e+06	2.35125e+06	5.89287e+06	3.00633e+06	3.39977e+06	3.99763e+06	6.60705e+06	6.93567e+06	3.1812e+06	1.27812e+07	3.41967e+06	4.15018e+06	3.23548e+06	3.82261e+06	2.12861e+06	1.28364e+06	2.32535e+06	8.80761e+06	4.42573e+06	5.54608e+06	4.03972e+06	3.21425e+06	3.36438e+06	3.40544e+06	3.9389e+06	4.02171e+06	3.89083e+06	3.37433e+06	3.39383e+06
M130T435	130.123	434.5	7.2	176997	257660	120116	258620	211041	34265.7	486458	454584	394481	417836	550188	299752	343033	723769	339791	522527	296520	396942	415107	696650	504293	419095	388133	769094	444959	432746	432192	444848	346451	432485	445247
M130T442	130.159	441.5	7.4	7.57838e+07	8.10032e+07	5.23112e+07	4.6335e+07	5.63704e+07	8.32258e+07	6.04151e+07	7.56053e+07	7.8488e+07	1.77453e+08	9.60909e+07	9.26533e+07	4.68104e+07	7.87435e+07	1.07526e+08	5.59549e+07	1.04478e+08	4.54087e+07	1.57802e+08	9.48549e+07	9.54719e+07	9.90144e+07	5.25199e+07	1.15579e+08	8.1367e+07	6.9159e+07	6.94557e+07	6.16318e+07	4.69716e+07	5.58003e+07	4.60514e+07
M130T613	130.123	612.7	10.2	578049	360597	1.22452e+06	618976	597057	4.99676e+06	749703	802527	1.12941e+06	931721	1.19755e+06	914594	1.18474e+06	772473	1.08639e+06	574265	517136	508051	429284	1.80113e+06	389078	317029	1.12862e+06	216244	724283	625108	588039	625063	583723	627040	419566
M130T72_1	129.979	72	1.2	2.93626e+06	1.2002e+06	3.39804e+06	4.61804e+06	3.38149e+06	2.67978e+06	1.25007e+06	3.6164e+06	4.65879e+06	4.096e+06	4.33593e+06	4.70792e+06	4.20661e+06	5.2664e+06	4.37861e+06	4.34817e+06	3.11794e+06	3.14835e+06	5.03676e+06	3.27899e+06	4.1173e+06	3.93212e+06	3.99038e+06	4.62277e+06	3.17475e+06	3.34833e+06	3.34715e+06	3.25733e+06	3.34566e+06	3.04183e+06	3.74137e+06
M130T72_2	130.017	71.7	1.2	7.98929e+07	3.81673e+07	5.73385e+07	4.88502e+07	4.1788e+07	2.7977e+07	9.01065e+07	3.63314e+07	5.61656e+07	3.498e+07	9.93098e+06	1.6855e+07	1.003e+07	7.4372e+07	1.01727e+07	5.73034e+07	1.53219e+07	4.53217e+06	1.21812e+07	2.23126e+07	1.23126e+07	9.76178e+06	7.7461e+07	3.81356e+07	4.84669e+07	5.32218e+07	3.20607e+07	4.81302e+07	3.33426e+07	3.62131e+07	5.44997e+07
M130T76	130.086	76.3	1.3	1.69609e+08	1.86545e+08	1.88349e+08	1.79879e+08	1.15473e+08	1.74051e+08	1.60208e+08	1.84226e+08	1.23268e+08	4.17498e+07	3.98237e+07	1.58167e+08	3.73532e+07	3.8992e+07	3.9495e+07	1.37579e+08	8.75443e+07	3.63226e+07	1.64881e+08	4.25028e+07	1.68338e+08	9.05437e+07	1.45503e+08	4.12688e+07	1.17358e+08	1.23934e+08	1.25982e+08	1.0137e+08	1.17934e+08	9.67125e+07	1.03767e+08
M130T815	130.159	815.2	13.6	1.00973e+08	1.98143e+08	1.61135e+08	3.69927e+08	1.97919e+08	9.59234e+06	1.05918e+08	4.90434e+07	2.22488e+08	2.68871e+08	9.51022e+07	1.13083e+08	1.74798e+08	8.07635e+07	1.21248e+08	2.6623e+08	3.81574e+08	1.43337e+08	5.15027e+08	7.30026e+07	3.09254e+08	1.48334e+08	2.56918e+08	4.96345e+08	2.13208e+08	1.12159e+08	2.67119e+08	2.13606e+08	1.88151e+08	2.12516e+08	1.24428e+08
M130T817	130.049	816.6	13.6	9.92168e+07	7.91402e+07	9.90502e+07	9.76958e+07	7.31316e+07	8.28025e+07	1.03883e+08	8.23249e+07	8.6648e+07	1.22441e+08	1.19267e+08	1.06141e+08	7.92904e+07	7.35398e+07	1.0623e+08	4.32483e+07	8.53418e+07	1.81744e+08	7.04033e+07	1.05535e+08	9.50551e+07	1.01687e+08	1.34451e+08	9.85052e+07	8.19152e+07	8.81606e+07	7.45163e+07	6.53956e+07	8.74432e+07	7.95487e+07	1.0366e+08
M130T838	130.049	838.1	14	6.57324e+07	5.40931e+07	5.24112e+07	3.77439e+07	5.16091e+07	4.78753e+07	5.21212e+07	5.88519e+07	6.88955e+07	5.92206e+07	8.85509e+07	5.54131e+07	3.18824e+07	5.802e+07	2.80238e+07	4.83267e+07	5.54203e+07	6.61914e+07	5.49575e+07	6.13126e+07	6.13426e+07	5.9781e+07	4.9231e+07	1.00819e+08	5.52015e+07	4.90762e+07	5.49813e+07	6.40366e+07	4.1473e+07	5.38424e+07	5.53642e+07
M130T839	130.159	838.8	14	1.69096e+08	5.93651e+07	3.29124e+07	1.39594e+08	1.31032e+07	5.72751e+06	7.42411e+07	8.60254e+07	7.51552e+07	1.78064e+08	1.47736e+08	1.62378e+07	5.17001e+07	1.67582e+08	1.81542e+08	2.25326e+08	1.69332e+08	6.90911e+07	1.72965e+08	2.06546e+08	2.0723e+08	1.64763e+08	1.69178e+08	5.94649e+07	1.42976e+08	8.55587e+07	8.68582e+07	8.56555e+07	9.53533e+07	8.63248e+07	8.94413e+07
M130T86	130.05	85.7	1.4	7.97676e+08	8.11996e+08	7.49383e+08	8.51915e+08	8.45544e+08	7.62535e+08	7.55244e+08	8.91027e+08	8.61222e+08	6.48351e+08	6.58566e+08	8.16406e+08	7.92129e+08	7.4153e+08	9.33656e+08	7.09427e+08	6.91758e+08	7.7537e+08	7.40181e+08	8.00892e+08	7.51849e+08	8.70525e+08	8.13497e+08	7.90926e+08	7.5523e+08	7.28727e+08	7.35906e+08	7.37044e+08	7.54377e+08	7.36439e+08	7.84543e+08
M130T99	130.086	99.4	1.7	8.54383e+06	9.69428e+06	2.83315e+06	1.41223e+07	7.31681e+06	4.07599e+06	3.32678e+06	2.42261e+06	689180	613957	2.23602e+06	569509	2.36864e+06	565581	1.49441e+06	629870	4.27765e+06	1.64362e+06	4.69064e+06	2.48714e+06	3.76176e+06	702449	2.04603e+06	3.37983e+06	5.21399e+06	4.04524e+06	3.85655e+06	3.85857e+06	3.85054e+06	4.04638e+06	3.84485e+06
M131T114	131	114.3	1.9	617455	2.73449e+06	407936	3.16698e+06	1.88955e+06	1.44499e+06	3.02584e+06	1.37963e+06	1.01231e+06	990163	1.02934e+06	1.10338e+06	2.05094e+06	1.19971e+06	2.27984e+06	2.15695e+06	1.53524e+06	2.19893e+06	1.10822e+06	2.17488e+06	346934	1.37963e+06	1.60754e+06	1.66447e+06	1.6138e+06	1.62841e+06	1.52419e+06	1.66552e+06	1.62229e+06	1.60502e+06	1.62847e+06
M131T116	130.602	115.9	1.9	457193	674267	518646	664099	505452	555437	516219	670794	478126	583827	515354	611557	479812	600247	541801	648941	408776	456734	291919	606412	464789	360444	287265	382675	440716	595446	473407	439180	439765	558748	370190
M131T123	131.053	123.3	2.1	1.79345e+06	3.37767e+06	1.20014e+06	3.85924e+06	2.10929e+06	175757	1.64872e+06	1.0092e+06	153071	149460	228999	166220	231195	182138	227072	230478	3.17188e+06	241554	3.7321e+06	3.30114e+06	1.46259e+06	130231	246072	288629	1.07415e+06	1.07708e+06	1.04714e+06	1.16518e+06	1.07897e+06	1.94535e+06	1.1535e+06
M131T155	131.053	155.3	2.6	8.55002e+06	5.24931e+06	7.42298e+06	6.18989e+06	6.52317e+06	6.94357e+06	5.10894e+06	7.14233e+06	6.20228e+06	8.46463e+06	4.89847e+06	7.62046e+06	6.67848e+06	7.73478e+06	5.51731e+06	6.56478e+06	5.78733e+06	6.37206e+06	6.16224e+06	7.25764e+06	6.24522e+06	7.13274e+06	6.24427e+06	6.82698e+06	7.62059e+06	7.41924e+06	7.28302e+06	7.68458e+06	6.77552e+06	7.7546e+06	8.06732e+06
M131T338	131.049	338.4	5.6	2.89567e+07	1.0709e+07	3.17836e+07	6.49933e+07	5.7137e+07	4.25784e+07	4.44766e+07	4.81826e+07	6.06694e+07	3.44361e+07	5.48318e+07	6.55793e+07	6.78878e+07	6.68572e+07	4.58133e+07	5.70811e+07	4.26619e+07	3.40685e+07	3.80182e+07	4.82101e+07	2.0334e+07	3.43616e+07	5.95171e+07	6.45225e+07	2.28156e+07	2.28338e+07	2.12346e+07	2.19777e+07	2.27947e+07	1.87264e+07	2.69343e+07
M131T35	130.966	34.9	0.6	6.42469e+06	5.11832e+06	5.3013e+06	4.52382e+06	4.21136e+06	4.3935e+06	5.53695e+06	5.31759e+06	7.34942e+06	6.40844e+06	6.82314e+06	5.60267e+06	6.11753e+06	5.7428e+06	5.49579e+06	5.67238e+06	6.29387e+06	6.43601e+06	5.93721e+06	6.86581e+06	7.21099e+06	7.0937e+06	7.13093e+06	8.02245e+06	6.14007e+06	6.18888e+06	6.13983e+06	6.13966e+06	6.25638e+06	5.92378e+06	6.20326e+06
M131T474	131.081	473.9	7.9	8.77641e+06	1.40801e+07	7.56053e+06	8.28321e+06	8.50432e+06	6.21777e+06	1.14254e+07	7.22604e+06	1.13672e+07	9.30888e+06	9.96342e+06	1.17527e+07	7.37508e+06	5.44339e+06	1.03263e+07	9.37917e+06	9.82113e+06	1.06166e+07	1.24399e+07	1.9879e+07	9.80177e+06	6.58332e+06	6.70715e+06	9.63972e+06	9.28132e+06	7.99312e+06	9.56565e+06	7.99839e+06	8.20243e+06	5.9933e+06	7.99084e+06
M131T550	131.085	550.1	9.2	1.30411e+06	652605	2.96923e+06	724016	766913	270045	1.15367e+06	617034	2.63154e+06	777653	2.72936e+06	2.1971e+06	2.26227e+06	259333	2.0933e+06	2.57769e+06	4.27916e+06	3.96929e+06	4.75876e+06	793407	2.88736e+06	881896	3.29242e+06	3.45367e+06	1.74476e+06	1.52834e+06	1.58257e+06	1.73144e+06	1.80172e+06	1.219e+06	1.7395e+06
M131T65	130.966	65.1	1.1	2.50214e+07	2.77657e+07	1.59762e+07	5.81632e+06	835298	2.81116e+06	443022	593190	4.41256e+06	1.99709e+06	1.11333e+06	3.21885e+07	1.89459e+06	1.8227e+06	3.97732e+06	3.27445e+06	7.27243e+06	2.93713e+06	1.49631e+07	1.05346e+06	2.0377e+06	5.00792e+06	5.20577e+06	4.63125e+06	6.57993e+06	4.00639e+06	3.98891e+06	3.90584e+06	7.31007e+06	6.75263e+06	4.37717e+06
M131T72_1	130.522	71.9	1.2	893703	1.02212e+06	869802	279728	212124	754540	2.95474e+06	391232	977395	1.11153e+06	1.17537e+06	296870	218275	309822	1.12228e+06	1.14961e+06	273263	261065	231523	1.10261e+06	286804	910601	226704	237806	1.37467e+06	791733	555845	791832	798726	884634	893558
M131T72_2	131.02	71.8	1.2	1.41685e+06	1.50205e+06	1.18808e+06	1.07296e+06	1.73519e+06	1.19839e+06	78664.7	1.46172e+06	1.58863e+06	1.23494e+06	1.74373e+06	1.81693e+06	1.24197e+06	1.38074e+06	1.39864e+06	1.43496e+06	1.55887e+06	1.01416e+06	1.92983e+06	1.39478e+06	1.34237e+06	1.08387e+06	1.40731e+06	1.24825e+06	1.16158e+06	1.1615e+06	1.1622e+06	1.15448e+06	1.24011e+06	1.19999e+06	1.19916e+06
M131T751	130.522	751.1	12.5	1.07421e+06	786001	3.24458e+06	3.65459e+06	1.03417e+06	1.30936e+06	2.97166e+06	962946	2.06559e+06	6.67274e+06	9.63499e+06	7.8226e+06	1.52451e+06	6.2638e+06	1.72078e+06	5.22643e+06	3.4237e+06	1.4271e+06	2.78842e+06	2.60559e+06	2.69749e+06	2.3191e+06	5.77491e+06	5.60037e+06	4.57616e+06	4.09614e+06	4.11145e+06	4.08187e+06	2.3132e+06	1.87829e+06	4.09631e+06
M131T76	131.09	76.3	1.3	1.26657e+06	6.79602e+06	7.659e+06	1.04894e+07	7.09703e+06	8.3792e+06	9.99839e+06	1.26604e+07	7.50465e+06	6.96191e+06	6.74813e+06	6.79294e+06	7.3781e+06	5.77985e+06	6.11675e+06	6.72205e+06	8.44895e+06	7.16924e+06	1.04688e+07	9.45847e+06	8.25036e+06	1.22276e+07	6.42249e+06	6.02276e+06	7.18926e+06	7.01052e+06	7.00971e+06	7.20577e+06	6.99971e+06	8.67524e+06	6.6167e+06
M131T800	130.522	799.9	13.3	1.51071e+07	2.56112e+07	2.91959e+07	3.14963e+07	1.40608e+07	2.67924e+07	1.61156e+07	1.94848e+07	1.71689e+07	2.29297e+07	4.35803e+07	2.48013e+07	1.23424e+07	2.76258e+07	1.93643e+07	1.72872e+07	8.1588e+06	2.38862e+07	1.65863e+07	2.16511e+07	1.78666e+07	1.76717e+07	1.26363e+07	2.31169e+07	1.73171e+07	1.90992e+07	1.90642e+07	1.75245e+07	2.56764e+07	1.73756e+07	1.74531e+07
M131T86	131.053	85.6	1.4	8.03079e+07	6.94367e+07	2.83066e+07	1.34235e+08	4.68973e+07	5.29001e+07	5.1198e+07	8.76918e+07	4.13953e+07	3.10548e+07	4.23627e+07	5.38217e+07	2.87097e+07	3.60375e+07	6.62059e+07	6.49476e+07	4.59686e+07	6.01733e+07	8.07545e+07	4.60523e+07	7.98296e+07	1.77173e+07	7.63976e+07	6.58065e+07	4.03295e+07	4.03987e+07	4.04027e+07	3.95264e+07	4.04564e+07	3.8851e+07	3.94378e+07
M131T89	131.034	88.6	1.5	1.47461e+06	1.75502e+06	1.51288e+06	1.91548e+06	663832	727210	1.41672e+06	453390	1.31034e+06	2.93294e+06	1.84181e+06	1.83184e+06	1.04684e+06	3.70731e+06	1.96859e+06	1.93784e+06	684851	1.57554e+06	1.67677e+06	1.85455e+06	2.65291e+06	2.22068e+06	1.66761e+06	2.4678e+06	1.82084e+06	1.77892e+06	1.79919e+06	1.38077e+06	1.82075e+06	1.81988e+06	1.8206e+06
M132T128	132.077	127.6	2.1	7.87592e+06	2.19956e+07	1.58495e+07	8.54846e+06	2.87256e+07	1.70098e+07	1.86608e+07	2.45247e+07	9.24477e+07	9.02054e+07	4.95672e+07	8.92272e+07	8.44691e+07	9.39426e+07	7.7704e+07	1.00449e+08	2.21181e+07	1.18078e+08	2.85248e+07	2.31853e+07	1.81627e+07	3.58195e+07	1.34824e+08	9.95223e+07	4.67713e+07	4.97642e+07	4.97001e+07	4.69514e+07	3.39991e+07	5.6742e+07	4.72308e+07
M132T144	132.077	143.9	2.4	8.13438e+06	1.70625e+07	1.02852e+07	4.05782e+07	1.05479e+07	2.23684e+07	1.50842e+07	2.21265e+07	1.41169e+07	1.46057e+07	1.37263e+07	1.42105e+07	3.95564e+07	1.4267e+07	1.46575e+07	2.2692e+07	3.71965e+07	4.01933e+07	5.74989e+07	3.48304e+07	7.25374e+07	1.90804e+07	2.34043e+06	1.25181e+07	1.54692e+07	2.30866e+07	2.36703e+07	2.47763e+07	2.46051e+07	1.31441e+07	2.46232e+07
M132T148	132.102	148.3	2.5	1.55269e+09	1.58479e+09	1.0282e+09	1.15882e+09	1.24481e+09	1.18141e+09	1.4895e+09	1.18918e+09	1.15259e+09	1.89306e+09	1.12077e+09	1.31146e+09	1.46036e+09	9.6932e+08	2.18109e+09	1.37808e+09	1.10231e+09	1.18618e+09	9.72831e+08	1.94449e+09	1.02685e+09	1.34491e+09	1.23451e+09	1.07233e+09	9.22701e+08	1.10011e+09	1.20092e+09	1.19046e+09	1.1869e+09	1.18485e+09	1.18356e+09
M132T188	132.012	188.2	3.1	2.09327e+06	1.67572e+06	1.53285e+06	1.30811e+06	1.97298e+06	1.00433e+06	2.34575e+06	1.62031e+06	1.68483e+06	1.70266e+06	2.06927e+06	1.36557e+06	915507	1.10574e+06	1.36859e+06	1.24208e+06	1.36684e+06	243128	1.96727e+06	1.42816e+06	1.15673e+06	1.68855e+06	1.28081e+06	1.44252e+06	1.14781e+06	1.14693e+06	1.11311e+06	1.1868e+06	1.17873e+06	1.04514e+06	1.11298e+06
M132T189_1	132.102	188.6	3.1	6.41705e+10	4.61153e+09	3.5203e+10	4.52248e+09	7.19027e+09	3.94013e+09	1.71128e+10	7.90409e+10	2.11501e+10	2.44952e+10	7.64173e+09	7.09268e+09	3.15626e+09	5.21939e+09	3.25461e+09	2.89169e+09	1.01266e+10	1.8984e+09	1.86552e+10	2.32523e+10	1.06259e+09	4.04652e+10	9.65001e+09	1.62709e+10	2.95693e+09	3.38072e+09	3.18427e+09	3.65534e+09	3.3649e+09	3.31436e+09	3.35971e+09
M132T189_2	132.191	189.4	3.2	1.46384e+06	1.34021e+06	1.23737e+06	1.24978e+06	1.31119e+06	1.29561e+06	1.24015e+06	1.21731e+06	1.1653e+06	1.54313e+06	1.1789e+06	1.29656e+06	1.21461e+06	1.15024e+06	1.47405e+06	1.12974e+06	1.32502e+06	1.38024e+06	1.60479e+06	1.20103e+06	1.18157e+06	1.44361e+06	1.19369e+06	1.17355e+06	1.3091e+06	1.24158e+06	1.25025e+06	1.44161e+06	1.3285e+06	1.50294e+06	1.2568e+06
M132T202	132.066	201.8	3.4	6.04978e+06	2.53091e+06	2.53421e+06	7.107e+06	1.00793e+07	1.27584e+07	2.28083e+06	8.8239e+06	6.99882e+06	8.54858e+06	1.66996e+07	2.53377e+06	6.30707e+06	7.52706e+06	7.27679e+06	1.43698e+07	8.62861e+06	643626	1.96004e+06	1.82514e+06	6.86267e+06	4.29088e+06	2.0657e+06	752411	5.51712e+06	4.33753e+06	4.03452e+06	6.37299e+06	3.60609e+06	4.28956e+06	5.45102e+06
M132T222	132.102	222.2	3.7	1.13092e+09	2.30096e+09	1.95102e+09	1.05575e+09	2.7259e+09	1.34533e+09	1.56647e+09	1.51814e+09	7.59387e+08	8.51058e+08	1.22461e+09	9.91987e+08	1.33633e+09	6.15738e+08	9.84347e+08	1.11237e+09	1.91425e+09	1.35389e+09	2.23345e+09	2.25738e+09	1.60887e+09	9.01797e+08	8.78772e+08	1.41014e+09	1.46291e+09	1.37102e+09	1.54228e+09	1.43242e+09	1.47893e+09	1.46315e+09	1.47887e+09
M132T338	132.053	338.4	5.6	1.75222e+06	2.36348e+06	2.00711e+06	2.51817e+06	1.51245e+06	1.33239e+06	1.16751e+06	1.96476e+06	2.11714e+06	2.31597e+06	1.53707e+06	2.35784e+06	1.55881e+06	2.17305e+06	2.04465e+06	1.94156e+06	1.84029e+06	2.07549e+06	1.93012e+06	1.33546e+06	1.54961e+06	1.90016e+06	1.41273e+06	610675	1.72994e+06	1.74923e+06	1.7927e+06	1.75896e+06	2.06856e+06	1.74632e+06	1.79304e+06
M132T339	132.077	338.8	5.6	7.12129e+06	6.07557e+06	5.24818e+06	7.10684e+06	1.59354e+06	6.3076e+06	7.13233e+06	5.60036e+06	7.08077e+06	9.96651e+06	1.10569e+07	1.29064e+07	1.17879e+07	8.34744e+06	1.17263e+07	1.09953e+07	9.96283e+06	1.29469e+07	6.23906e+06	7.35046e+06	9.10753e+06	6.08514e+06	5.43058e+06	9.52135e+06	6.43873e+06	7.01007e+06	6.8899e+06	6.78727e+06	7.83957e+06	6.79058e+06	7.01014e+06
M132T397	132.078	397.2	6.6	41780.6	3.15416e+06	3.61252e+06	1.18476e+06	1.06778e+06	139458	7.43582e+06	6.58927e+06	346512	19616.5	9.59067e+06	2.09873e+06	5.996e+06	5.52843e+06	1.82255e+06	8.20623e+06	1.41672e+06	2.30419e+06	1.51569e+06	9.31203e+06	2.82654e+06	566838	1.39445e+07	9.17042e+06	5.00552e+06	4.68672e+06	5.02233e+06	5.66881e+06	6.53001e+06	5.51739e+06	4.55267e+06
M132T76	132.091	76.1	1.3	156028	265475	256647	296181	119730	172474	308196	307512	293246	225650	173962	130965	293227	312765	76775.1	77386.1	110466	161006	211897	344101	158582	322555	145301	153594	289212	152867	314583	306662	360216	323534	296061
M132T770	132.077	769.8	12.8	1.12967e+07	7.07036e+06	1.20031e+07	1.10879e+07	8.72975e+06	7.6734e+06	1.08733e+07	6.76946e+06	7.8969e+06	1.30901e+07	9.5755e+06	9.29207e+06	1.11194e+07	1.60284e+07	1.25244e+07	1.34278e+07	1.25489e+07	1.44607e+07	1.27979e+07	9.57379e+06	1.46607e+07	1.07169e+07	8.26782e+06	1.41341e+07	9.71472e+06	5.46298e+06	9.59144e+06	8.43276e+06	1.0162e+07	9.1166e+06	9.10251e+06
M132T86	132.054	85.6	1.4	4.05072e+06	1.21545e+07	4.27977e+06	4.78927e+06	7.06223e+06	3.96946e+06	6.20665e+06	1.02463e+07	5.20399e+06	2.72488e+06	3.05228e+06	2.76649e+06	1.33633e+06	2.11629e+06	356475	440864	9.26629e+06	2.13141e+06	4.53981e+06	5.66529e+06	9.62241e+06	6.05312e+06	3.11761e+06	8.21791e+06	3.38874e+06	3.41043e+06	4.77567e+06	3.41569e+06	3.70004e+06	3.60227e+06	3.41469e+06
M132T87	132.065	87	1.4	1.46733e+07	1.52498e+07	1.45348e+07	1.51452e+07	1.49151e+07	1.53431e+07	1.5783e+07	1.47362e+07	1.53503e+07	1.49072e+07	1.43093e+07	1.4254e+07	1.34544e+07	1.39316e+07	1.39901e+07	1.41149e+07	1.46751e+07	1.49714e+07	1.53687e+07	1.62467e+07	1.50375e+07	1.58904e+07	1.49332e+07	1.42966e+07	1.49368e+07	1.48032e+07	1.49728e+07	1.48025e+07	1.5521e+07	1.45786e+07	1.48007e+07
M132T94_1	131.987	94.4	1.6	2.19198e+07	1.74297e+07	2.06257e+07	1.87782e+07	2.80075e+07	1.72815e+07	1.52583e+07	1.72992e+07	1.79534e+07	2.07531e+07	1.88824e+07	1.7057e+07	4.66051e+06	1.80896e+07	1.97005e+07	1.59457e+07	1.94061e+07	1.99101e+07	1.70481e+07	1.56859e+07	1.84446e+07	2.04351e+07	1.87442e+07	1.7344e+07	8.43072e+06	1.56812e+07	1.51341e+07	1.49837e+07	9.26378e+06	1.70022e+07	1.56333e+07
M132T94_2	132.077	94.4	1.6	2.41688e+10	2.33538e+10	2.18914e+10	2.41444e+10	1.91867e+10	1.85928e+10	2.48382e+10	2.54386e+10	2.50189e+10	2.40355e+10	2.26178e+10	2.04493e+10	2.25264e+10	2.59085e+10	2.62932e+10	2.56158e+10	2.48864e+10	2.54533e+10	2.51715e+10	2.63736e+10	2.5607e+10	2.56742e+10	2.47309e+10	2.5005e+10	2.45422e+10	2.43887e+10	2.42066e+10	2.43901e+10	2.54172e+10	2.43882e+10	2.43893e+10
M132T94_3	132.118	94.3	1.6	1.81016e+06	5.15701e+06	3.95646e+06	3.40359e+06	4.7882e+06	5.82856e+06	4.32389e+06	6.18085e+06	1.00878e+07	4.41201e+06	9.03915e+06	7.7688e+06	9.04483e+06	3.54602e+06	6.28225e+06	5.60212e+06	6.7037e+06	8.88454e+06	1.11994e+07	6.96291e+06	5.87505e+06	6.96189e+06	5.73911e+06	9.03699e+06	6.37434e+06	5.70213e+06	7.17771e+06	5.69814e+06	5.73132e+06	5.70897e+06	5.72592e+06
M132T94_4	132.166	94.4	1.6	1.37342e+07	1.33521e+07	1.37034e+07	1.3036e+07	1.2444e+07	1.32293e+07	1.43303e+07	1.34869e+07	1.72389e+07	1.38239e+07	1.91203e+07	1.20468e+07	1.32995e+07	1.41664e+07	1.36936e+07	1.31755e+07	1.67849e+07	1.21841e+07	1.33525e+07	1.37215e+07	1.39016e+07	1.71301e+07	1.49347e+07	1.33992e+07	1.42757e+07	1.43957e+07	1.42389e+07	1.43958e+07	1.53328e+07	1.42396e+07	1.42436e+07
M132T99	132.048	99.1	1.7	438641	559168	484980	355809	191398	548888	456581	399494	346021	284125	437265	661739	243488	754203	40368.2	1.22335e+06	479087	1.09463e+06	522455	377569	556213	327470	325444	402573	758800	523611	758818	415616	743655	697767	794301
M133T114	133.08	114.2	1.9	1.47411e+07	1.2688e+07	1.05016e+07	1.6575e+07	1.51035e+07	1.75665e+07	1.16367e+07	1.70236e+07	1.43779e+07	1.68948e+07	1.42785e+07	1.5169e+07	1.85929e+07	1.2079e+07	1.63797e+07	1.74267e+07	1.14377e+07	1.35247e+07	9.78764e+06	1.96576e+07	1.59739e+07	1.58757e+07	1.92383e+07	1.20033e+07	1.82991e+07	1.64007e+07	1.82344e+07	1.20552e+07	1.78102e+07	1.70319e+07	1.84489e+07
M133T122	133.032	121.7	2	3.44547e+06	1.36682e+08	1.0522e+08	2.15948e+06	3.81966e+06	1.93419e+07	1.23609e+08	1.06346e+08	4.67424e+06	3.37877e+06	1.24643e+08	1.14957e+08	1.14707e+08	1.316e+08	1.04988e+08	1.18093e+08	8.35941e+07	1.00277e+08	1.50954e+06	1.27873e+08	6.02552e+07	1.52774e+07	9.58246e+07	1.0321e+08	8.84746e+07	8.83678e+07	9.02126e+07	9.05681e+07	9.92206e+07	8.84294e+07	9.04906e+07
M133T140	133.032	139.8	2.3	2.48201e+06	4.93434e+06	3.67341e+06	1.98665e+06	4.71511e+06	398279	3.89055e+06	1.98756e+06	382059	26093.8	1.69384e+06	65529.5	355846	108278	170067	175906	4.30326e+06	1.4587e+06	7.34407e+06	4.723e+06	2.54571e+06	371884	1.57532e+06	1.18718e+06	2.42622e+06	2.42933e+06	2.42707e+06	2.42867e+06	2.69818e+06	2.5006e+06	2.7261e+06
M133T148	133.105	148.2	2.5	1.36621e+08	1.94056e+07	1.36094e+08	8.6067e+07	1.81271e+07	1.06028e+08	3.24275e+07	2.43119e+07	1.19047e+07	1.72014e+08	2.24709e+07	1.47778e+07	1.01818e+08	1.61338e+07	1.05722e+08	8.89714e+07	7.18509e+07	8.66001e+07	2.14719e+08	2.55376e+08	1.29177e+08	1.12594e+08	1.2227e+07	1.49769e+08	6.05824e+07	7.74119e+07	6.57763e+07	7.80224e+07	7.72373e+07	7.79516e+07	4.86061e+07
M133T189	133.105	188.7	3.1	6.69056e+07	2.64643e+08	1.92596e+08	4.91095e+07	1.65394e+08	4.55488e+07	2.94784e+08	1.87902e+08	6.0765e+07	4.1652e+08	2.10764e+08	5.78227e+07	1.94355e+08	2.73904e+08	3.0335e+08	2.62446e+08	1.95878e+08	4.868e+07	1.45746e+08	7.05988e+07	2.1521e+08	2.66491e+08	1.91021e+08	5.0247e+08	1.87263e+08	1.97299e+08	5.65324e+07	1.85329e+08	1.97897e+08	1.96682e+08	1.967e+08
M133T222	133.105	222.1	3.7	1.11402e+08	1.42987e+08	1.42801e+08	1.91055e+08	1.10293e+08	1.38303e+08	1.20777e+08	1.07719e+08	3.45468e+07	1.37025e+08	1.5206e+08	4.40418e+07	3.55499e+07	1.34939e+08	3.43436e+07	3.4261e+07	1.75516e+08	5.5386e+07	2.12146e+08	3.68842e+07	2.37735e+08	1.25113e+08	6.02951e+07	2.3486e+08	8.32301e+07	8.47695e+07	8.4989e+07	8.45737e+07	1.10716e+08	1.14099e+08	8.68932e+07
M133T280	133.049	279.6	4.7	3.35196e+06	541246	3.35837e+06	2.59022e+06	2.82191e+06	2.3956e+06	4.55513e+06	3.41697e+06	552347	2.50533e+06	2.99821e+06	2.53447e+06	47730.6	2.7586e+06	351507	423962	3.27419e+06	433864	433236	437651	3.88139e+06	2.58406e+06	558129	3.99774e+06	2.79134e+06	2.96862e+06	2.79273e+06	2.8515e+06	2.79402e+06	2.94755e+06	2.7934e+06
M133T353	133.086	353.3	5.9	936942	1.20962e+06	2.92283e+06	3.73346e+06	1.83182e+06	911146	946417	5.17028e+06	1.08921e+06	1.84404e+06	750757	3.16843e+06	964384	3.44467e+06	1.30869e+06	1.69733e+06	2.81421e+06	2.32085e+06	4.12754e+06	2.35958e+06	2.10972e+06	5.01284e+06	1.03677e+06	2.01132e+06	1.56505e+06	1.41718e+06	1.42767e+06	1.47063e+06	1.627e+06	1.43357e+06	2.21754e+06
M133T72	132.998	71.8	1.2	3.11223e+06	2.55356e+06	2.14224e+06	3.23089e+06	2.46128e+06	2.24025e+06	2.42719e+06	2.91015e+06	2.54285e+06	3.34026e+06	3.28989e+06	3.77256e+06	2.98183e+06	3.13704e+06	2.64707e+06	3.40167e+06	2.4435e+06	2.6062e+06	3.04776e+06	2.86526e+06	2.60826e+06	3.09131e+06	3.0636e+06	3.27402e+06	2.57672e+06	2.28062e+06	2.57526e+06	2.52674e+06	2.61967e+06	2.52766e+06	2.52795e+06
M133T742	133.101	742.5	12.4	626846	485736	476262	1.23219e+06	842779	476829	1.11549e+06	686686	1.9137e+06	1.47098e+06	1.87377e+06	2.08594e+06	1.29736e+06	2.31987e+06	1.17262e+06	2.53068e+06	625102	711549	695931	1.09504e+06	1.64403e+06	478004	1.34158e+06	764173	712634	687918	780930	706283	907126	718778	996516
M133T768	133.101	767.6	12.8	1.82559e+06	2.43616e+06	3.06573e+06	1.45739e+06	2.93109e+06	3.00855e+06	3.71145e+06	1.60387e+06	810830	1.73408e+06	3.20597e+06	2.48434e+06	2.02708e+06	2.94573e+06	1.63333e+06	630077	1.41745e+06	1.04336e+06	213429	1.56409e+06	1.77069e+06	633111	233479	540916	1.11568e+06	1.20715e+06	1.53052e+06	2.03233e+06	1.35821e+06	1.13327e+06	1.20866e+06
M133T85	133.061	84.6	1.4	5.0344e+07	4.41245e+07	3.86334e+07	4.49377e+07	5.01013e+07	4.04862e+07	4.56636e+07	4.16315e+07	1.9941e+07	4.61691e+07	5.44162e+07	6.35307e+07	4.87445e+07	1.49411e+07	6.2587e+07	6.04808e+07	5.15204e+07	5.6205e+07	6.73671e+07	4.66385e+07	3.09557e+07	5.48844e+07	1.58323e+07	5.76995e+07	5.35446e+07	4.96907e+07	5.32066e+07	4.81976e+07	4.99695e+07	5.28461e+07	5.66456e+07
M133T94	133.08	94.3	1.6	7.64132e+08	8.76295e+08	8.05337e+08	8.55661e+08	7.42988e+08	7.91569e+08	9.42955e+08	7.9267e+08	1.41319e+09	1.88237e+09	1.47698e+09	1.28784e+09	9.47629e+08	1.92574e+09	1.52485e+09	1.02099e+09	1.02806e+09	1.36419e+09	1.23829e+09	1.11311e+09	1.08648e+09	1.41042e+09	1.00023e+09	1.39774e+09	1.09011e+09	1.06335e+09	1.0652e+09	1.0656e+09	1.06627e+09	1.16357e+09	1.15639e+09
M134T101	134.027	100.9	1.7	1.3712e+06	1.35985e+07	1.98099e+07	1.06823e+07	1.28543e+07	1.84565e+07	2.34861e+07	2.76958e+07	2.94008e+07	2.74153e+07	2.31201e+07	2.42935e+07	1.90198e+07	2.47328e+07	2.08413e+07	2.59276e+07	1.6738e+07	3.47526e+07	1.79939e+07	1.29468e+07	1.9418e+07	3.73498e+07	3.22492e+07	3.56207e+07	2.08314e+07	2.38446e+07	1.969e+07	2.31516e+07	2.25691e+07	2.25663e+07	2.32842e+07
M134T108	134.118	108.4	1.8	563131	1.75021e+06	288020	1.91243e+06	603719	104599	86279.8	109439	350335	75181.2	269000	66356.8	596200	51994.5	85870.7	81129.9	780221	671604	1.05117e+06	524186	450871	69862	517556	581951	579510	590210	587211	590286	618516	585124	585119
M134T122	134.035	121.6	2	6.26772e+06	6.91383e+06	5.30686e+06	6.66132e+06	4.27781e+06	6.729e+06	3.3409e+06	5.29791e+06	4.14195e+06	3.17752e+06	3.80611e+06	3.62891e+06	2.29991e+06	3.08539e+06	2.89043e+06	3.48247e+06	2.41038e+06	900169	3.65735e+06	3.01424e+06	3.12661e+06	4.47127e+06	3.46205e+06	2.57258e+06	4.11827e+06	4.01904e+06	4.01811e+06	4.0714e+06	4.11617e+06	4.18214e+06	3.3349e+06
M134T155	133.515	155.3	2.6	2.17044e+06	2.02741e+06	2.18338e+06	2.14747e+06	1.81489e+06	976617	2.70155e+06	2.54398e+06	2.33703e+06	3.20544e+06	2.66577e+06	2.03411e+06	1.69095e+06	2.92843e+06	2.39899e+06	2.86989e+06	2.891e+06	2.09212e+06	3.21828e+06	2.61758e+06	2.81093e+06	2.06054e+06	1.84778e+06	2.51865e+06	2.27793e+06	2.31594e+06	2.31557e+06	2.27758e+06	2.60208e+06	2.15725e+06	2.14062e+06
M134T189	134.107	189.3	3.2	2.96001e+06	4.41323e+06	5.4901e+06	5.28523e+06	4.28167e+06	4.43468e+06	4.6612e+06	4.73004e+06	1.52329e+07	2.2657e+07	1.53629e+07	1.448e+07	1.70727e+07	1.58158e+07	1.90424e+07	1.79151e+07	5.66373e+06	1.52802e+07	6.84276e+06	8.05758e+06	7.33523e+06	1.1883e+07	1.23473e+07	1.50631e+07	1.00387e+07	1.00392e+07	9.35939e+06	1.01926e+07	1.01874e+07	1.00363e+07	1.01894e+07
M134T222	134.107	222.4	3.7	2.14326e+06	4.76151e+06	4.14325e+06	4.46863e+06	4.24012e+06	3.66082e+06	2.34678e+06	4.7787e+06	1.39319e+07	1.93525e+07	1.19771e+07	1.20682e+07	1.37635e+07	1.31016e+07	9.45263e+06	1.43885e+07	6.54927e+06	1.63257e+07	6.97522e+06	6.01517e+06	6.7695e+06	6.76489e+06	8.04175e+06	1.03455e+07	6.21437e+06	6.59349e+06	7.14546e+06	6.8696e+06	5.16306e+06	6.88677e+06	6.63658e+06
M134T384	134.063	384.2	6.4	497365	611604	584620	1.5793e+06	946094	924896	527575	660072	1.15046e+06	422994	336783	533137	222563	544854	159342	350680	399166	505161	801257	811730	767475	445903	972130	449861	650551	592639	557223	564572	573047	557869	556894
M134T76	134.101	76	1.3	223591	86338.9	105587	200527	131692	76869.2	93311	100671	418398	402375	443671	886501	590627	673849	848749	647345	497252	356702	522416	266421	309077	634405	573912	147125	496395	451800	449282	453587	468566	504451	503197
M134T85	134.045	85.2	1.4	5.75947e+08	6.7689e+08	5.63522e+08	5.67901e+08	5.82529e+08	2.52467e+08	9.79554e+08	7.84951e+08	1.13031e+08	1.0982e+08	7.66032e+07	7.42982e+07	7.04036e+07	2.49406e+08	8.74695e+07	6.68882e+07	6.5781e+08	6.69471e+07	3.98087e+08	7.19019e+08	4.34795e+08	7.708e+07	6.0061e+07	7.23144e+07	3.22023e+08	3.31154e+08	3.09747e+08	3.31387e+08	3.71347e+08	3.28565e+08	3.31195e+08
M134T94	134.081	94.3	1.6	9.56322e+07	1.08089e+08	9.77744e+07	9.96541e+07	8.35352e+07	7.15115e+07	1.00788e+08	9.18311e+07	1.0056e+08	1.13514e+08	1.10605e+08	9.90745e+07	9.68057e+07	1.25989e+08	9.94556e+07	1.07174e+08	1.29816e+08	8.13791e+07	9.58929e+07	9.98681e+07	1.10338e+08	9.02116e+07	7.61024e+07	9.89645e+07	1.00504e+08	9.48708e+07	1.02058e+08	1.02063e+08	1.02031e+08	1.02028e+08	1.00445e+08
M135T454	134.999	454	7.6	228867	473812	94647.3	49961.9	35126.2	29591.8	53279.9	48165.8	30253.1	296779	33494.4	10941.5	232655	40378.8	50393.8	164478	15206.9	31979.4	159293	299164	46097.6	41837.5	37779.3	47706	78622	93433	104848	98557.6	101647	71454.6	93608.3
M135T485	135.081	485	8.1	174313	3962.33	34002.2	19259.9	634763	201369	639.405	17175.5	231106	26683.8	239107	53849.7	140797	412722	131573	116896	221432	213778	128107	199113	203160	143525	116965	34385.5	102308	266309	262608	238134	266028	266033	264216
M135T612	135.117	611.6	10.2	128262	83697.7	121821	183740	114553	119087	167438	177215	168734	153872	170669	123750	205820	91810.9	157283	158317	87636.7	71002.2	136308	186049	126396	235396	190502	70828.9	176380	151747	168018	176045	186545	171202	171463
M135T624	135.08	624.1	10.4	3.56157e+06	4.40851e+06	2.29855e+06	4.85193e+06	4.24039e+06	2.17192e+06	3.36479e+06	1.97517e+06	5.76737e+06	8.21473e+06	5.46772e+06	8.17021e+06	3.42027e+06	5.95805e+06	3.85495e+06	4.78912e+06	4.14323e+06	4.94688e+06	3.96155e+06	3.63343e+06	1.82452e+06	4.50702e+06	5.30437e+06	5.96395e+06	3.96908e+06	3.96721e+06	2.60683e+06	3.97034e+06	4.33232e+06	3.72863e+06	3.80382e+06
M135T742	135.08	741.6	12.4	4.68705e+06	2.67613e+06	1.12248e+07	4.25333e+06	1.51144e+07	1.62838e+07	3.87862e+06	1.00324e+07	5.37188e+06	4.53996e+06	2.01454e+07	9.18875e+06	2.54195e+06	9.78223e+06	6.26784e+06	4.53561e+06	1.3174e+07	6.08908e+06	3.56797e+06	7.71037e+06	7.25949e+06	6.34002e+06	3.10485e+06	4.27299e+06	7.25839e+06	6.16604e+06	6.99026e+06	4.7072e+06	7.53779e+06	6.15231e+06	6.22312e+06
M135T79	135.003	78.7	1.3	1.22396e+06	970425	824734	921491	1.25479e+06	1.03254e+06	1.2596e+06	616420	1.00379e+06	799447	1.1805e+06	748437	835119	836418	840076	837505	1.25277e+06	1.00302e+06	1.2253e+06	1.11545e+06	1.11925e+06	980223	984888	1.00962e+06	904943	851941	873522	898374	904025	904982	903671
M135T801	135.081	801.4	13.4	178903	1.30908e+06	411282	1.71144e+06	480507	545485	359308	964446	2.21853e+06	2.91371e+06	556073	800873	2.03667e+06	671530	2.14778e+06	2.27168e+06	1.27241e+06	1.19095e+06	1.95046e+06	1.30679e+06	2.11416e+06	676411	977816	800095	1.38173e+06	1.37633e+06	780074	1.46314e+06	1.54959e+06	1.29527e+06	1.79193e+06
M135T812	135.08	811.7	13.5	1.51486e+06	1.58509e+06	1.88615e+06	2.18821e+06	1.51154e+06	3.23787e+06	3.10866e+06	1.59985e+06	2.35068e+06	3.01695e+06	7.68622e+06	2.93589e+06	2.2646e+06	2.19877e+06	1.89214e+06	2.39031e+06	1.76092e+06	2.57857e+06	2.26071e+06	2.94278e+06	1.12723e+06	1.62974e+06	1.42636e+06	1.97708e+06	2.27454e+06	2.14706e+06	2.14595e+06	2.386e+06	2.25953e+06	1.42701e+06	2.01159e+06
M135T85	135.048	85.2	1.4	1.3273e+07	1.49754e+07	1.27408e+07	1.69477e+07	1.3418e+07	1.2563e+07	1.33928e+07	1.34821e+07	2.89646e+06	1.04237e+07	1.06778e+07	1.08934e+07	8.09563e+06	1.33247e+07	1.04008e+07	1.006e+07	1.86681e+07	8.15631e+06	2.01704e+07	1.60565e+07	1.80915e+07	1.20164e+07	9.79397e+06	1.27369e+07	1.3129e+07	1.35803e+07	1.31628e+07	1.33458e+07	1.33572e+07	1.35648e+07	1.41649e+07
M135T90	135.065	90.1	1.5	258815	1.68755e+06	2.52401e+06	1.73789e+06	1.71161e+06	2.01386e+06	2.71883e+06	2.36124e+06	2.05262e+06	3.32842e+06	3.52821e+06	3.89547e+06	4.09295e+06	4.21155e+06	3.97614e+06	3.51812e+06	2.81068e+06	5.94258e+06	2.95783e+06	2.95156e+06	3.22043e+06	2.57002e+06	2.76752e+06	2.33756e+06	3.104e+06	3.10477e+06	3.0312e+06	3.03187e+06	3.10315e+06	2.76559e+06	3.28844e+06
M136T100	136.062	99.6	1.7	8.91435e+06	1.47053e+07	1.03033e+07	4.09688e+06	1.09983e+07	6.11413e+06	1.94108e+07	1.48685e+07	5.89031e+06	5.93203e+06	1.03162e+07	1.03108e+07	1.73363e+07	1.25234e+07	1.01045e+07	9.35235e+06	1.09419e+07	1.99914e+07	2.10155e+07	1.62441e+07	1.02689e+07	1.02673e+07	8.11428e+06	1.61002e+07	1.00294e+07	1.00517e+07	9.17828e+06	1.01627e+07	5.62998e+06	8.65352e+06	1.00151e+07
M136T101	136.023	100.9	1.7	877301	626012	2.23064e+06	1.98166e+06	887473	2.51161e+06	731852	1.21859e+06	1.27544e+06	937274	680577	1.60588e+06	1.22564e+06	1.11967e+06	1.4668e+06	997890	1.99306e+06	1.51335e+06	1.25634e+06	961991	1.35121e+06	1.30935e+06	1.42587e+06	1.01267e+06	1.12434e+06	970391	1.12616e+06	949663	1.2772e+06	1.29199e+06	1.38491e+06
M136T105	136.043	104.8	1.7	243392	210228	947738	254109	233100	250346	244494	238810	1.45277e+06	4.44214e+06	2.87539e+06	1.16403e+06	1.89609e+06	2.28608e+06	1.77321e+06	1.50427e+06	264268	3.35337e+06	930892	1.36302e+06	1.42048e+06	1.01539e+06	956019	2.66348e+06	1.30801e+06	1.40169e+06	1.35337e+06	1.43042e+06	1.42876e+06	1.42845e+06	1.42808e+06
M136T119	136.062	119	2	2.07721e+07	1.993e+08	1.39246e+08	2.49358e+07	1.87443e+07	2.27259e+07	2.15621e+08	1.18527e+08	2.91226e+07	3.11081e+07	8.39265e+07	1.13912e+08	1.72142e+08	1.05828e+08	7.70817e+07	9.68929e+07	1.41536e+08	1.59721e+08	2.21746e+07	8.15244e+07	1.0079e+07	4.12297e+07	1.09883e+08	1.37309e+08	9.3107e+07	9.26477e+07	1.02801e+08	1.03535e+08	1.02555e+08	1.05595e+08	9.19753e+07
M136T124	136.076	124.4	2.1	4.14582e+07	5.345e+07	4.71822e+07	4.2009e+07	3.73967e+07	4.26141e+07	4.77825e+07	4.83437e+07	8.01275e+07	5.33481e+07	9.27201e+07	5.60115e+07	4.55888e+07	4.26691e+07	5.71995e+07	5.10914e+07	4.78207e+07	7.85566e+07	4.87136e+07	4.97739e+07	4.87437e+07	6.88563e+07	6.33554e+07	4.40847e+07	4.24604e+07	4.46124e+07	4.64884e+07	3.83017e+07	4.69134e+07	5.18678e+07	4.63865e+07
M136T139	136.076	139.4	2.3	1.15183e+07	1.01735e+07	4.80226e+06	1.09562e+07	2.3635e+07	1.07671e+07	2.19028e+07	1.0451e+07	4.01272e+07	4.75051e+07	3.45395e+07	4.30006e+07	2.1074e+07	2.65072e+07	4.42626e+07	4.59937e+07	3.63676e+07	2.90969e+07	3.36267e+07	3.41228e+07	3.42479e+07	2.95618e+07	4.19829e+07	3.50564e+07	2.60762e+07	2.51706e+07	2.74036e+07	2.60728e+07	2.72885e+07	2.52489e+07	2.19199e+07
M136T191	136.076	190.8	3.2	1.5899e+07	1.3734e+07	1.38624e+07	1.48846e+07	1.84571e+07	1.52023e+07	1.95015e+07	1.61522e+07	1.39787e+07	1.85511e+07	1.73644e+07	1.96117e+07	2.0296e+07	2.14941e+07	2.01386e+07	1.75253e+07	2.36577e+07	2.03425e+07	1.7849e+07	1.62521e+07	1.92207e+07	1.64408e+07	1.52593e+07	1.36567e+07	1.44951e+07	1.46321e+07	1.52451e+07	1.46326e+07	1.61963e+07	1.46432e+07	1.49225e+07
M136T334	136.062	333.8	5.6	1.96111e+06	1.12491e+06	3.00416e+06	2.6182e+07	3.16192e+06	2.99015e+06	2.95624e+06	6.61658e+06	1.88362e+06	2.39023e+06	7.08954e+06	3.54237e+06	2.24726e+06	2.68917e+06	987076	1.23023e+06	1.07042e+06	4.22493e+06	2.31834e+06	1.12477e+06	1.22312e+06	1.27466e+06	510183	6.4574e+06	2.38047e+06	2.60055e+06	2.60115e+06	2.67764e+06	1.78431e+06	2.89749e+06	2.04779e+06
M136T385	136.063	385.2	6.4	1.03664e+07	1.881e+07	2.66243e+06	9.22716e+06	2.49584e+06	8.73725e+06	3.90107e+06	1.61474e+07	2.58326e+06	3.02244e+06	2.77778e+06	2.02025e+06	2.38504e+06	1.35464e+07	2.49969e+06	2.38605e+06	1.34259e+07	2.01342e+06	2.25782e+06	7.0838e+06	1.13292e+07	8.14799e+06	2.30935e+06	1.11273e+07	8.32246e+06	7.48231e+06	8.12315e+06	9.0619e+06	7.7485e+06	6.62912e+06	5.19553e+06
M136T478	136.076	478.5	8	3.39843e+06	1.17661e+06	4.43704e+06	2.41641e+06	4.93256e+06	5.35227e+06	2.0751e+06	1.44959e+06	2.99956e+06	1.93031e+06	1.016e+06	1.76552e+06	2.20573e+06	3.08281e+06	3.16631e+06	1.80294e+06	1.10366e+06	2.24283e+06	1.88257e+06	1.76924e+06	2.7476e+06	2.66242e+06	4.52429e+06	2.88026e+06	2.27428e+06	2.50274e+06	2.20286e+06	2.2695e+06	2.24912e+06	2.70418e+06	2.87222e+06
M136T662	136.022	662.3	11	3.35323e+06	3.21764e+06	4.458e+06	2.50599e+06	4.31928e+06	4.57809e+06	3.30309e+06	2.58353e+06	4.01133e+06	1.47226e+06	4.68842e+06	4.76043e+06	1.35101e+06	3.23941e+06	3.47275e+06	3.19955e+06	2.15801e+06	3.68198e+06	2.32353e+06	3.90006e+06	2.39835e+06	3.01537e+06	1.99551e+06	1.47656e+06	1.27071e+06	2.79968e+06	2.4253e+06	2.81263e+06	3.08235e+06	2.81472e+06	2.47926e+06
M136T771	136.048	770.6	12.8	3.55742e+06	6.54996e+06	4.83848e+06	4.85187e+06	4.02729e+06	1.77411e+06	6.43618e+06	6.43226e+06	4.47475e+06	1.89746e+06	3.18307e+06	2.10967e+06	4.80705e+06	3.3312e+06	5.73097e+06	2.60722e+06	3.40593e+06	818959	4.61725e+06	6.71074e+06	3.61109e+06	7.1288e+06	3.87217e+06	355079	4.29077e+06	4.68123e+06	5.00586e+06	5.02822e+06	5.11458e+06	3.3343e+06	5.02114e+06
M136T92	136.048	91.8	1.5	2.34418e+06	1.55555e+06	1.54607e+06	1.79048e+06	1.74123e+06	1.81363e+06	2.11605e+06	1.63296e+06	3.97096e+06	3.91772e+06	4.30217e+06	5.82505e+06	3.03898e+06	4.38444e+06	5.59957e+06	5.28214e+06	3.32234e+06	1.57526e+06	3.35494e+06	3.61483e+06	1.93777e+06	2.14968e+06	2.9291e+06	2.29463e+06	2.34676e+06	2.78602e+06	2.69872e+06	3.15901e+06	2.68196e+06	3.01563e+06	2.68064e+06
M137T119	137.065	118.8	2	8.59838e+06	1.32108e+07	7.74928e+06	1.5061e+07	7.5517e+06	7.16351e+06	7.83044e+06	7.02573e+06	2.01155e+06	1.4477e+06	1.64044e+06	1.63906e+06	764701	2.14129e+06	1.05196e+06	1.18713e+06	1.04757e+07	648740	1.06153e+07	7.72027e+06	7.56822e+06	2.34241e+06	2.0801e+06	3.20024e+06	4.6206e+06	4.83139e+06	5.18951e+06	5.48009e+06	4.95714e+06	4.82958e+06	4.82871e+06
M137T125	137.079	124.7	2.1	5.75394e+06	2.34388e+06	4.2341e+06	5.73392e+06	7.48924e+06	3.52388e+06	5.46725e+06	4.86758e+06	3.85618e+06	2.0663e+06	2.82779e+06	4.61673e+06	4.04537e+06	2.06972e+06	4.78655e+06	4.58829e+06	2.22203e+06	3.19249e+06	4.8749e+06	3.48502e+06	2.21787e+06	4.60741e+06	2.18104e+06	3.19197e+06	2.73004e+06	2.93064e+06	3.71744e+06	2.70524e+06	2.82571e+06	2.95416e+06	2.97937e+06
M137T139	137.079	139.1	2.3	1.05864e+06	722734	761339	887340	1.28611e+06	818978	847729	801068	896519	891394	734223	1.00436e+06	1.34105e+06	687665	744515	872097	1.03543e+06	773172	1.34678e+06	836455	750816	713057	647734	609628	778378	859126	852597	852489	837077	851463	839397
M137T146_1	136.951	145.7	2.4	6.44474e+06	866887	3.91739e+06	1.0499e+07	6.28404e+06	5.7802e+06	3.29821e+06	4.38307e+06	1.01265e+07	5.75206e+06	4.61764e+06	5.82656e+06	5.20889e+06	5.52438e+06	5.56539e+06	6.21373e+06	5.27558e+06	4.84733e+06	9.81773e+06	3.94052e+06	7.82903e+06	7.01374e+06	1.47061e+06	6.49393e+06	3.42097e+06	1.36507e+06	3.79493e+06	3.46234e+06	3.4627e+06	3.74402e+06	4.69882e+06
M137T146_2	137.046	145.7	2.4	2.41366e+09	1.98785e+09	2.34144e+09	2.34632e+09	2.04272e+09	2.60131e+09	2.83118e+09	2.89286e+09	2.63093e+09	2.90694e+09	2.95247e+09	2.65094e+09	3.03778e+09	3.12397e+09	3.11683e+09	3.0862e+09	2.57922e+09	3.33036e+09	2.74633e+09	2.88222e+09	3.48825e+09	3.03998e+09	2.73468e+09	3.52028e+09	2.67141e+09	2.9704e+09	2.67156e+09	2.67154e+09	2.70201e+09	2.7018e+09	2.67187e+09
M137T146_3	137.141	146.1	2.4	1.06013e+06	1.44957e+06	954688	969031	933556	1.0015e+06	1.68819e+06	1.43083e+06	1.07753e+06	1.11053e+06	1.16192e+06	1.23026e+06	1.18265e+06	968297	1.7496e+06	1.18578e+06	824066	1.65607e+06	701457	1.08597e+06	1.27722e+06	1.03532e+06	850648	1.17303e+06	1.24687e+06	1.22753e+06	1.11209e+06	1.24226e+06	1.13808e+06	1.31034e+06	1.23793e+06
M137T191	137.079	191.2	3.2	1.69192e+06	1.33903e+06	796268	2.2727e+06	1.98291e+06	1.29011e+06	867740	691256	2.43091e+06	1.60401e+06	916345	894217	850848	633466	1.14639e+06	835083	923152	693175	2.28347e+06	1.11967e+06	798856	2.88568e+06	713003	662730	1.0218e+06	893514	1.0233e+06	904182	1.02336e+06	1.0219e+06	1.10842e+06
M137T193	137.06	192.8	3.2	8.00327e+06	6.71328e+06	5.97038e+06	5.90533e+06	7.32525e+06	6.60145e+06	5.99961e+06	5.05198e+06	7.19541e+06	6.99755e+06	7.0346e+06	6.20097e+06	9.58179e+06	2.99742e+06	6.75538e+06	6.72454e+06	6.28601e+06	1.04313e+07	8.59701e+06	9.87852e+06	4.80969e+06	6.37254e+06	7.59649e+06	5.94207e+06	6.69354e+06	7.08787e+06	6.69047e+06	6.69387e+06	6.62894e+06	6.97307e+06	6.79764e+06
M137T259	137.06	258.6	4.3	5.42071e+06	5.21578e+06	4.52889e+06	4.60555e+06	4.42138e+06	5.58879e+06	5.29718e+06	8.02812e+06	3.44647e+06	3.61846e+06	2.82618e+06	3.8626e+06	4.75524e+06	4.28763e+06	4.50465e+06	4.97116e+06	5.73909e+06	9.12531e+06	4.40549e+06	4.23646e+06	8.40262e+06	4.81234e+06	2.74329e+06	4.94494e+06	4.57186e+06	4.59556e+06	4.63444e+06	4.77427e+06	4.39075e+06	4.76517e+06	4.84222e+06
M137T280_2	137.046	280.1	4.7	2.11258e+09	1.98509e+09	1.92934e+09	1.71891e+09	1.90231e+09	1.51344e+09	1.97952e+09	2.34742e+09	2.15891e+09	3.56209e+09	2.0712e+09	1.392e+09	1.95359e+09	1.38956e+09	1.88231e+09	1.92906e+09	1.78456e+09	2.01764e+09	4.28291e+09	2.04363e+09	2.11841e+09	2.16458e+09	1.90771e+09	2.01572e+09	2.1067e+09	2.03098e+09	2.03126e+09	2.10398e+09	2.04767e+09	2.09941e+09	2.09969e+09
M137T280_3	137.14	279.6	4.7	1.05754e+06	833544	1.25557e+06	709218	1.15513e+06	1.48058e+06	1.43905e+06	1.69351e+06	1.21025e+06	1.07419e+06	1.10652e+06	1.31019e+06	1.47214e+06	1.22787e+06	1.13322e+06	1.08183e+06	900845	1.60559e+06	1.33921e+06	1.80359e+06	973674	1.00271e+06	971650	1.12462e+06	1.14558e+06	1.10794e+06	1.02439e+06	1.12511e+06	1.12543e+06	1.10595e+06	1.12462e+06
M137T306	137.046	306.4	5.1	2.61188e+07	4.80091e+07	4.80089e+07	3.51168e+07	4.96507e+07	3.7304e+07	5.06179e+07	4.86264e+07	4.84573e+07	4.1244e+07	3.11444e+07	4.16294e+07	3.51981e+07	3.69972e+07	5.21728e+07	3.94108e+07	4.39758e+07	5.08819e+07	8.86262e+07	3.5175e+07	4.1406e+07	3.37832e+07	2.88758e+07	5.33611e+07	4.0656e+07	4.06564e+07	4.21058e+07	4.06836e+07	4.99279e+07	4.06899e+07	4.20397e+07
M137T385	137.065	385.2	6.4	127319	109197	193650	165665	135210	224400	134630	170516	244220	305186	264131	138655	277673	131323	187126	189704	245742	833557	537298	285017	351792	275428	425178	403819	246459	245372	245378	253384	245312	229130	269781
M137T517	137.096	516.8	8.6	734560	738307	734093	824446	33016.5	39554.4	931184	900247	929023	611026	1.00716e+06	106220	903013	712647	1.04604e+06	1.2171e+06	804771	774252	1.23906e+06	870445	1.30894e+06	929192	968636	1.20799e+06	795070	853350	630413	796969	886838	746974	748188
M137T65	137.132	64.9	1.1	1.20549e+06	1.71707e+06	2.15716e+06	1.79721e+06	1.59434e+06	2.60341e+06	5.3455e+06	1.57398e+06	1.72773e+06	2.21945e+06	1.88377e+06	1.95418e+06	1.59329e+06	4.24915e+06	1.74069e+06	1.93017e+06	2.04148e+06	2.15235e+06	3.96261e+06	2.35485e+06	1.97609e+06	1.84923e+06	1.91324e+06	2.52764e+06	1.99881e+06	1.92467e+06	1.88244e+06	1.85549e+06	1.92553e+06	1.61174e+06	1.92438e+06
M137T88	137.071	88.5	1.5	871566	471506	1.0275e+06	584452	1.58991e+06	822312	1.84616e+06	1.46119e+06	1.95203e+06	2.26985e+06	2.13613e+06	1.52622e+06	1.67021e+06	1.60174e+06	1.84935e+06	1.83802e+06	1.9055e+06	1.71061e+06	2.03951e+06	2.13384e+06	1.59379e+06	1.61103e+06	1.46669e+06	1.7238e+06	1.47837e+06	1.44418e+06	1.4264e+06	1.4899e+06	1.47774e+06	1.45042e+06	1.53715e+06
M138T100	138.055	100.1	1.7	1.0369e+07	1.10764e+07	9.65047e+06	1.1916e+07	7.78926e+06	6.55972e+06	9.24113e+06	9.65588e+06	7.46637e+06	6.91279e+06	8.11091e+06	8.16339e+06	9.67811e+06	7.68887e+06	8.67742e+06	8.4199e+06	9.9526e+06	9.97834e+06	1.39844e+07	8.30622e+06	7.97209e+06	1.12232e+07	8.76007e+06	1.00839e+07	6.00228e+06	6.24079e+06	6.08694e+06	6.08901e+06	6.19441e+06	6.09098e+06	6.90144e+06
M138T121	138.066	121.4	2	1.50784e+07	2.80794e+07	1.70606e+07	2.17228e+07	1.22576e+07	1.11024e+07	1.66458e+07	1.87313e+07	1.61594e+07	2.56217e+07	1.79853e+07	2.20378e+07	7.74064e+06	2.29656e+07	1.79947e+07	1.7512e+07	2.68824e+07	1.06175e+07	1.78845e+07	2.11491e+07	1.98812e+07	2.48549e+07	3.05265e+06	2.84186e+07	1.78019e+07	1.78024e+07	1.78035e+07	1.78095e+07	1.92182e+07	1.78104e+07	1.81522e+07
M138T130	137.987	129.6	2.2	1.54973e+07	1.50629e+07	1.66745e+07	1.34693e+07	1.10869e+07	1.30483e+07	1.46113e+07	1.3671e+07	1.72029e+07	1.42673e+07	1.52659e+07	1.19093e+07	1.28699e+07	1.40738e+07	1.50977e+07	1.19749e+07	1.61314e+07	1.28382e+07	1.69445e+07	1.94605e+07	1.86275e+07	1.40961e+07	1.54794e+07	1.71921e+07	1.48868e+07	1.53476e+07	1.52451e+07	1.49009e+07	1.5115e+07	1.44004e+07	1.52674e+07
M138T180	138.049	180	3	1.33376e+08	1.14659e+08	1.56061e+08	1.17749e+08	1.61801e+08	1.48834e+08	1.82798e+08	1.27738e+08	2.04881e+08	2.1871e+08	2.6087e+08	2.03184e+08	2.13774e+08	2.69102e+08	1.85041e+08	2.58712e+08	1.75758e+08	2.71178e+08	1.82105e+08	1.92831e+08	1.91278e+08	1.91075e+08	1.82567e+08	2.25769e+08	1.79742e+08	1.79663e+08	1.79824e+08	1.90082e+08	1.91009e+08	1.60948e+08	1.84668e+08
M138T34	137.986	33.7	0.6	4.8734e+07	6.3706e+07	5.26383e+07	8.39943e+07	5.07652e+07	5.39275e+07	1.54692e+07	2.01254e+07	1.62917e+07	1.48928e+07	5.24069e+07	3.8146e+07	5.15822e+07	1.58545e+07	1.46829e+07	1.91932e+07	4.46526e+07	5.63382e+07	5.10378e+07	4.74737e+07	1.84642e+07	4.00757e+07	1.6371e+07	5.63999e+07	2.97748e+07	2.49228e+07	4.25223e+07	2.49084e+07	2.48835e+07	2.45542e+07	3.10559e+07
M138T400	138.023	399.6	6.7	238103	570721	199934	769302	396349	151823	363238	139479	1.30554e+06	1.76363e+06	727701	1.52231e+06	3.26287e+06	1.16599e+06	2.4765e+06	1.66659e+06	2.70375e+06	5.91866e+06	4.02497e+06	553021	806591	727764	3.18616e+06	2.74714e+06	1.40962e+06	1.40931e+06	1.40971e+06	1.56809e+06	1.47529e+06	1.37071e+06	1.78281e+06
M138T65	137.986	64.9	1.1	6.50714e+07	5.91653e+07	6.3076e+07	6.37346e+07	6.01763e+07	2.3417e+07	5.70881e+07	6.07907e+07	2.42244e+07	2.82559e+07	2.72065e+07	2.40645e+07	2.25591e+07	3.68124e+07	2.80769e+07	2.62965e+07	6.98933e+07	3.07407e+07	6.84122e+07	6.95648e+07	7.14591e+07	2.65876e+07	2.76781e+07	3.76052e+07	4.47359e+07	4.66893e+07	4.38106e+07	4.51424e+07	4.51424e+07	4.47319e+07	4.47388e+07
M138T66	138.065	65.8	1.1	9.68886e+06	1.53994e+07	1.41785e+07	1.75715e+06	7.4949e+06	2.40044e+07	1.46838e+07	1.45838e+07	1.20543e+07	1.47388e+07	1.52528e+07	1.40665e+07	1.23576e+06	2.02594e+07	1.15688e+07	1.12435e+07	2.46287e+06	1.84169e+06	2.21594e+06	1.91707e+07	1.61354e+07	1.60202e+07	2.66173e+06	1.30638e+07	1.14364e+07	1.17174e+07	1.19325e+07	1.11239e+07	1.30906e+07	1.14303e+07	1.11234e+07
M139T100	139.058	100	1.7	189580	67095.6	117209	215826	281711	172094	283866	236436	256505	300632	191827	246352	76988.7	164391	87761.3	210827	61713.8	244219	323725	195555	46057.3	223798	182347	167796	145121	109993	209316	211851	191233	149627	171892
M139T106	139.042	105.9	1.8	519038	414361	317918	502230	245058	186206	395465	463678	378149	511440	329798	322315	403135	575917	497966	500558	329925	839676	326519	557296	341460	432837	425601	738449	352666	377709	353175	305365	353640	450396	376133
M139T108	139.087	107.9	1.8	2.00281e+06	2.18808e+06	1.90058e+06	1.62817e+06	1.41111e+06	840808	1.16612e+06	1.89475e+06	1.2878e+06	1.64212e+06	1.18159e+06	1.93428e+06	1.48368e+06	1.46895e+06	1.2369e+06	1.29288e+06	436173	933475	1.6972e+06	2.34051e+06	1.67556e+06	266442	1.12247e+06	870902	1.66971e+06	1.6863e+06	1.52017e+06	1.48722e+06	1.52066e+06	1.52058e+06	1.55586e+06
M139T122	139.05	121.6	2	1.16831e+07	5.33374e+06	4.14695e+06	5.63921e+06	3.52456e+06	9.25596e+06	3.81367e+06	4.56212e+06	1.66258e+07	1.21694e+07	1.20003e+07	1.02199e+07	1.08827e+07	4.48036e+06	1.41537e+07	1.29829e+07	3.36481e+06	9.49472e+06	3.11065e+06	3.23174e+06	8.07777e+06	1.4054e+07	1.38781e+07	1.25572e+07	1.11161e+07	1.06627e+07	1.11051e+07	1.05307e+07	1.04122e+07	4.7666e+06	1.12141e+07
M139T130	138.986	129.6	2.2	9.53197e+06	3.00254e+07	6.30603e+06	4.53425e+07	1.03507e+07	5.48796e+06	6.22923e+06	5.29519e+06	5.57195e+06	4.99165e+06	6.43563e+06	5.12196e+06	9.97199e+06	5.11881e+06	6.56371e+06	6.64817e+06	1.71746e+07	1.38059e+07	1.89238e+07	1.16893e+07	1.43156e+07	4.66941e+06	1.22872e+07	1.38237e+07	1.1669e+07	1.16704e+07	1.16697e+07	1.21764e+07	9.52362e+06	1.17907e+07	1.18766e+07
M139T146	139.05	145.7	2.4	4.76065e+06	1.28911e+07	1.20672e+07	5.85058e+06	7.72797e+06	6.23916e+06	1.24811e+07	9.81935e+06	9.18971e+06	7.86901e+06	1.44636e+07	1.65516e+06	1.52492e+07	9.43001e+06	1.00403e+07	1.17016e+07	8.4573e+06	1.24728e+07	9.57915e+06	1.53228e+07	9.96329e+06	8.71594e+06	1.33607e+07	1.18933e+07	5.90347e+06	1.10163e+07	9.05927e+06	1.09196e+07	1.0901e+07	1.09315e+07	1.01683e+07
M139T180	139.051	180.3	3	5.06901e+06	4.94046e+06	5.539e+06	6.67983e+06	4.7651e+06	3.65616e+06	8.41153e+06	7.14003e+06	4.65312e+06	3.96235e+06	5.90835e+06	7.91861e+06	5.48821e+06	8.64343e+06	8.23569e+06	1.17107e+07	1.18934e+06	1.24325e+07	3.50403e+06	3.99265e+06	7.80906e+06	1.20429e+07	4.88266e+06	1.12855e+07	5.63494e+06	5.65399e+06	8.66395e+06	5.63455e+06	5.64039e+06	6.08102e+06	5.64908e+06
M139T280	139.05	280.1	4.7	1.56777e+07	4.89782e+06	1.3983e+07	1.804e+06	1.30067e+07	1.10664e+07	1.47444e+07	1.15774e+07	1.51477e+07	1.56157e+06	1.95761e+07	3.57918e+06	208006	2.1005e+06	1.22514e+06	1.10703e+06	2.82668e+06	310150	517371	3.13353e+06	4.72048e+06	8.81091e+06	1.48294e+06	4.1662e+06	2.41973e+06	5.27744e+06	5.2878e+06	4.98854e+06	5.26689e+06	5.27238e+06	5.26719e+06
M139T371	139.087	371	6.2	1.77261e+06	361763	262394	2.40157e+06	2.38666e+06	1.70146e+06	205230	1634.34	2.80476e+06	2.15362e+06	193319	243065	285375	1613.84	246919	216423	242241	225585	2.72404e+06	1582.65	14778.5	2.58393e+06	282377	247470	1.05892e+06	1.09731e+06	1.06107e+06	1.05899e+06	1.0915e+06	875947	1.09495e+06
M139T65	139.112	64.8	1.1	1.2981e+06	3.03045e+06	1.29452e+06	2.98778e+06	5.27665e+06	3.00944e+06	5.25531e+06	3.43713e+06	3.03334e+06	1.52258e+06	2.86096e+06	3.05838e+06	3.88082e+06	2.9246e+06	2.83844e+06	3.48537e+06	4.29084e+06	1.52182e+06	1.45042e+06	1.32105e+06	3.20077e+06	4.49663e+06	4.42552e+06	4.01844e+06	1.5055e+06	1.54682e+06	1.69337e+06	1.52349e+06	1.5491e+06	2.49583e+06	1.62812e+06
M139T710	139.112	710.4	11.8	2.67115e+06	2.42098e+06	2.69873e+06	2.75833e+06	2.53073e+06	3.43778e+06	2.16788e+06	2.8516e+06	2.93437e+06	4.25536e+06	1.68526e+06	5.85468e+06	1.82426e+06	1.35069e+06	2.35214e+06	2.20057e+06	2.63563e+06	1.45647e+06	2.66725e+06	1.98984e+06	2.37993e+06	2.06511e+06	2.41372e+06	2.62428e+06	2.14182e+06	2.38224e+06	2.40022e+06	2.41167e+06	2.38352e+06	2.33836e+06	2.26804e+06
M139T74	139.098	73.5	1.2	4.09284e+06	2.70826e+06	4.01411e+06	1.96485e+06	3.19864e+06	3.26391e+06	4.3137e+06	3.10271e+06	3.85476e+06	2.34056e+06	5.1536e+06	3.67326e+06	1.22967e+06	3.03344e+06	1.83001e+06	1.84983e+06	3.12741e+06	1.06305e+06	1.48597e+06	2.38103e+06	2.48542e+06	4.38488e+06	1.9098e+06	2.55153e+06	2.74202e+06	2.79027e+06	2.80163e+06	2.80661e+06	2.80242e+06	2.74813e+06	2.84638e+06
M140T111	140.082	111.1	1.9	6.27382e+06	1.54998e+07	1.19096e+07	6.69966e+06	1.12925e+07	6.76179e+06	9.38218e+06	9.17912e+06	1.35752e+07	1.1944e+07	1.25574e+07	1.53392e+07	1.05502e+07	1.04401e+07	1.09116e+07	1.08236e+07	1.84463e+07	1.2453e+07	1.49368e+07	1.12309e+07	1.61122e+07	1.38873e+07	1.06794e+07	1.6136e+07	1.0898e+07	1.05898e+07	1.08992e+07	1.05564e+07	1.13737e+07	1.10051e+07	1.07002e+07
M140T114_1	140.005	114.3	1.9	1.18527e+06	4.9363e+06	441604	775551	181163	120466	723269	162219	95108.5	2.2999e+06	158536	177064	637676	212386	642857	288019	168944	227843	2.55388e+06	2.92761e+06	114096	122704	179756	1.17658e+06	325328	748920	805818	799366	800889	756015	800524
M140T114_2	140.071	113.6	1.9	1.4607e+06	160253	1.09707e+06	5.14337e+06	1.86182e+06	103497	1.16001e+06	946616	865492	581424	783078	579385	1.03329e+06	591269	733713	733055	1.77375e+06	1.29965e+06	2.58388e+06	1.44514e+06	1.49609e+06	498392	1.57953e+06	1.2721e+06	1.51973e+06	1.51015e+06	1.53154e+06	1.48381e+06	1.54118e+06	1.53156e+06	1.53149e+06
M140T130	139.982	130	2.2	2.39232e+07	7.10784e+07	3.08224e+07	5.21855e+07	3.16369e+07	2.80519e+07	1.01616e+07	9.01297e+06	1.36253e+07	1.49625e+07	1.39962e+07	1.29036e+07	4.41193e+07	4.11982e+07	1.3094e+07	1.23893e+07	3.53429e+07	7.65008e+07	4.66788e+07	3.95348e+07	3.83374e+07	1.20031e+07	4.3692e+07	1.57321e+07	3.61274e+07	3.58733e+07	3.51219e+07	3.60442e+07	3.73945e+07	3.58738e+07	3.61243e+07
M140T160	139.981	160	2.7	5.81887e+07	6.50191e+07	4.60919e+07	6.04901e+07	4.00608e+07	4.40858e+07	7.23355e+07	4.17835e+07	4.47431e+07	3.79888e+07	5.00483e+07	6.27081e+07	5.46501e+07	6.02213e+07	3.808e+07	4.58301e+07	2.63396e+07	5.3469e+07	4.04633e+07	5.46958e+07	2.94747e+07	6.7999e+07	4.74627e+07	5.29757e+07	5.38414e+07	6.33957e+07	6.29433e+07	5.56996e+07	5.78955e+07	6.21898e+07	6.22399e+07
M140T194	139.98	194.5	3.2	1.66638e+08	3.21328e+08	1.48731e+08	1.48753e+08	9.8113e+07	1.1057e+08	1.2451e+08	1.66098e+08	1.34089e+08	1.88757e+08	1.25589e+08	1.32111e+08	5.94517e+07	1.90068e+08	1.26947e+08	1.2739e+08	1.77221e+08	7.5305e+07	1.17265e+08	1.52575e+08	1.39142e+08	1.5789e+08	1.33862e+08	2.43214e+08	1.69686e+08	1.6697e+08	1.69746e+08	1.69032e+08	1.47644e+08	1.37938e+08	1.39008e+08
M140T233	139.984	232.5	3.9	4.59953e+08	2.00009e+08	1.89595e+08	4.51385e+08	1.70249e+08	1.93465e+08	2.43264e+08	1.70699e+08	2.35201e+08	1.37995e+08	1.83433e+08	1.73951e+08	1.59698e+08	1.75079e+08	1.50068e+08	2.01118e+08	1.57318e+08	2.11102e+08	2.16222e+08	1.8462e+08	1.57801e+08	2.1322e+08	2.02899e+08	1.68449e+08	1.73613e+08	1.88375e+08	1.91493e+08	1.92034e+08	2.02571e+08	1.91936e+08	1.79382e+08
M140T250	139.98	250	4.2	1.76634e+08	2.54171e+08	1.75846e+08	1.80671e+08	1.4976e+08	1.42899e+08	2.06897e+08	1.8439e+08	7.68702e+07	1.48469e+08	8.65049e+07	9.61227e+07	1.71938e+08	6.99732e+07	1.18771e+08	1.19055e+08	1.27029e+08	1.265e+08	1.26124e+08	1.71102e+08	1.07925e+08	1.08563e+08	1.00577e+08	1.07952e+08	1.09223e+08	1.07055e+08	1.04506e+08	1.06394e+08	1.10559e+08	1.1687e+08	1.06966e+08
M140T267	139.981	266.5	4.4	5.84633e+07	1.05795e+08	6.66257e+07	6.35929e+07	1.0253e+08	2.72513e+07	8.23245e+07	7.35288e+07	1.93527e+08	8.57063e+08	3.59816e+08	4.56479e+08	5.28104e+08	5.32816e+08	8.43963e+08	6.95774e+08	8.86636e+07	4.13305e+07	3.55281e+08	6.0783e+08	1.01841e+08	4.15716e+08	7.07391e+07	4.10557e+08	2.06676e+08	1.15073e+08	2.07105e+08	1.9712e+08	2.08947e+08	1.17139e+08	2.06164e+08
M140T287	139.981	287.4	4.8	1.53855e+08	3.8957e+09	3.55136e+09	2.88808e+08	2.66614e+08	1.54088e+08	3.51285e+09	3.61481e+09	3.87234e+08	2.74122e+08	3.81743e+09	3.50077e+09	3.60276e+09	3.77924e+09	3.48679e+09	3.75575e+09	3.48911e+09	3.54107e+09	2.08229e+08	3.70806e+09	3.61685e+09	2.81241e+08	3.5132e+09	3.5945e+09	1.33172e+08	1.39959e+08	1.37198e+08	1.35946e+08	1.4013e+08	1.37101e+08	1.4798e+08
M140T299	139.984	299.4	5	1.20929e+07	5.22149e+07	1.3681e+08	1.93581e+07	5.01944e+07	7.20637e+07	4.26978e+07	5.03032e+07	1.91722e+07	4.37499e+07	3.11607e+07	2.67785e+07	1.34921e+08	2.17853e+07	8.21391e+07	7.77018e+07	5.05682e+07	5.86058e+07	1.64788e+08	4.90751e+07	1.58959e+08	2.51062e+07	2.07957e+07	3.24295e+07	6.35077e+07	6.46791e+07	6.1974e+07	6.35238e+07	6.65828e+07	6.35512e+07	6.80615e+07
M140T348	139.984	348	5.8	3.85392e+07	2.9413e+07	4.0783e+07	2.06615e+07	2.70695e+07	2.02882e+07	6.19438e+06	1.72086e+07	3.06461e+07	3.81014e+07	3.3777e+07	3.59342e+07	2.55389e+07	5.49409e+06	2.32387e+07	2.18648e+07	2.68387e+07	9.16107e+06	4.52536e+07	3.03002e+07	2.88488e+07	9.85336e+06	2.00717e+07	2.7021e+07	2.66458e+07	2.78216e+07	2.38297e+07	2.66653e+07	2.66855e+07	2.58296e+07	2.58721e+07
M140T364	140.07	364.3	6.1	3.3963e+06	5.74299e+06	6.18964e+06	3.25862e+06	8.40488e+06	1.38783e+07	4.35711e+06	4.25571e+06	7.36688e+06	4.2587e+06	2.75619e+06	3.57704e+06	7.15172e+06	2.07247e+06	3.02039e+06	3.25821e+06	6.06493e+06	2.68655e+06	4.28125e+06	1.0827e+07	5.43257e+06	5.12203e+06	3.83917e+06	5.26524e+06	4.37141e+06	4.61268e+06	4.36958e+06	4.5615e+06	5.30488e+06	4.2791e+06	4.57298e+06
M140T387	140.143	386.7	6.4	2.12856e+06	2.52947e+06	1.3609e+06	1.94702e+06	1.99272e+06	764654	1.40012e+06	399851	1.72733e+06	1.39692e+06	1.36211e+06	1.78894e+06	1.70904e+06	939416	1.30723e+06	298508	1.37183e+06	705481	1.73993e+06	1.61809e+06	973226	1.54195e+06	1.08513e+06	1.03771e+06	1.39364e+06	1.3973e+06	806789	1.20863e+06	1.31931e+06	1.39919e+06	1.39661e+06
M140T405	139.984	404.6	6.7	5.25931e+07	2.4928e+07	2.57131e+07	7.88288e+06	1.78747e+07	1.84298e+07	4.90161e+07	2.14547e+07	1.03997e+07	9.90866e+06	1.55982e+07	7.62447e+06	2.22312e+07	7.73833e+06	8.39303e+06	8.30585e+06	1.41009e+07	8.13613e+06	6.94221e+06	4.67838e+07	8.16606e+06	1.51395e+07	7.94869e+06	9.50975e+06	2.06117e+07	1.78113e+07	1.7909e+07	1.78405e+07	1.85489e+07	1.9661e+07	2.05001e+07
M140T472	139.981	472.3	7.9	2.94499e+07	3.7515e+07	1.96041e+07	2.30575e+07	2.77468e+07	3.7947e+07	3.03969e+07	2.24653e+07	2.92516e+07	4.42809e+07	4.4398e+07	4.32317e+07	2.62269e+07	4.06993e+07	2.77252e+07	2.97114e+07	2.7679e+07	2.33946e+07	3.51803e+07	2.35937e+07	3.22937e+07	2.33691e+07	2.72433e+07	3.56272e+07	2.48339e+07	2.49381e+07	2.47592e+07	2.26618e+07	2.50704e+07	2.08303e+07	2.2705e+07
M140T493	139.984	493.4	8.2	6.2867e+06	9.78863e+06	1.17932e+07	1.6471e+07	9.50756e+06	7.32494e+06	7.82283e+06	1.07447e+07	1.00136e+07	7.68502e+06	5.32377e+06	8.6155e+06	3.59969e+06	1.6346e+07	4.39544e+06	5.42826e+06	7.55066e+06	5.54205e+06	9.84254e+06	6.44493e+06	7.96504e+06	1.17322e+07	4.34304e+06	1.38004e+07	5.91778e+06	5.97564e+06	8.87367e+06	5.96779e+06	6.48931e+06	6.00215e+06	5.9949e+06
M140T506	139.98	506.3	8.4	1.1388e+07	1.40335e+07	8.60898e+06	1.00177e+07	5.99146e+06	1.49652e+07	1.18373e+07	1.06941e+07	1.29506e+07	1.337e+07	4.64396e+06	1.2379e+07	5.90681e+06	1.40317e+07	1.16646e+07	8.61958e+06	1.07034e+07	1.36492e+07	9.55558e+06	1.08187e+07	1.0779e+07	1.72076e+07	2.42411e+07	1.1581e+07	1.27177e+07	1.28984e+07	1.51481e+07	1.27212e+07	1.29434e+07	1.20429e+07	8.14949e+06
M140T540	139.98	539.7	9	1.73111e+07	1.0093e+07	2.08072e+07	1.28794e+07	1.07344e+07	1.96015e+07	1.19765e+07	1.4274e+07	2.57101e+07	1.85635e+07	1.92458e+07	1.53243e+07	1.05748e+07	2.7784e+07	8.4288e+06	1.12991e+07	1.23697e+07	1.12515e+07	9.89173e+06	1.02963e+07	1.77387e+07	1.98023e+07	1.63964e+07	3.39333e+07	9.98491e+06	1.02677e+07	1.43783e+07	1.09252e+07	1.08952e+07	1.01876e+07	1.01249e+07
M140T557	139.98	557.2	9.3	7.47429e+06	5.0885e+06	1.75818e+07	1.24713e+07	1.26093e+07	4.98381e+06	9.74982e+06	7.82621e+06	9.77817e+06	5.88222e+06	5.85255e+06	1.34274e+07	7.13943e+06	5.98481e+06	6.59447e+06	5.9317e+06	1.53029e+07	1.08474e+07	7.22228e+06	1.14551e+07	9.68264e+06	4.05204e+06	7.94352e+06	6.35212e+06	7.77725e+06	9.30004e+06	9.3171e+06	9.33307e+06	7.85511e+06	6.17033e+06	9.45146e+06
M140T575	139.981	575.5	9.6	3.4132e+06	4.27412e+06	7.28068e+06	5.11415e+06	9.78599e+06	6.38415e+06	5.05455e+06	1.14723e+07	1.01195e+07	9.86598e+06	1.19346e+07	1.49363e+07	9.03159e+06	9.28505e+06	6.58256e+06	1.06713e+07	9.65234e+06	1.14232e+07	1.75617e+07	1.27891e+07	1.02739e+07	1.08502e+07	1.12874e+07	1.56839e+07	9.58152e+06	5.92592e+06	9.53085e+06	6.07029e+06	9.49159e+06	9.39617e+06	9.27528e+06
M140T593	139.98	593.4	9.9	3.12313e+06	4.55315e+06	6.87769e+06	2.94434e+06	1.18698e+07	2.16695e+07	4.28415e+06	3.30391e+06	5.57669e+06	1.76927e+06	1.36078e+06	9.4849e+06	5.96986e+06	2.44862e+06	3.05502e+06	2.62202e+06	988830	538465	2.03661e+06	827688	1.41028e+06	4.27608e+06	3.00831e+06	152605	3.30944e+06	3.31688e+06	2.91154e+06	3.18522e+06	3.31232e+06	2.50501e+06	3.31181e+06
M140T609	139.98	608.7	10.1	3.99683e+06	7.87579e+06	4.55179e+06	6.58946e+06	7.43723e+06	5.49573e+06	5.13279e+06	4.23125e+06	3.76548e+06	5.30747e+06	5.9303e+06	7.78024e+06	6.67867e+06	3.51928e+06	2.95339e+06	5.65302e+06	4.33962e+06	2.00521e+06	4.72731e+06	6.18018e+06	4.94963e+06	4.63535e+06	8.91165e+06	1.43387e+06	6.41961e+06	7.251e+06	5.3377e+06	7.15879e+06	6.94748e+06	6.58465e+06	6.61225e+06
M140T619	139.98	619.4	10.3	851865	426995	2.43272e+06	667541	1.29509e+06	1.54961e+06	1.69892e+06	1.68e+06	1.81169e+06	3.48882e+06	2.61013e+06	2.81179e+06	3.4099e+06	2.30411e+06	3.21266e+06	1.92471e+06	1.17568e+06	1.36482e+06	718794	1.71399e+06	2.1108e+06	2.47936e+06	2.24819e+06	1.11921e+06	2.37136e+06	2.07938e+06	2.0731e+06	2.08152e+06	1.65921e+06	1.89718e+06	1.94129e+06
M140T69	139.963	68.9	1.1	7.30937e+06	6.69406e+06	7.10584e+06	6.39497e+06	6.84922e+06	5.41712e+06	6.78877e+06	6.31121e+06	8.65429e+06	7.36387e+06	9.47293e+06	8.15065e+06	1.02092e+07	6.60656e+06	7.15967e+06	7.69464e+06	9.41109e+06	1.1094e+07	8.9683e+06	8.4758e+06	7.64853e+06	8.00099e+06	5.88738e+06	7.59375e+06	7.20877e+06	7.15356e+06	7.43018e+06	3.47843e+06	7.54256e+06	7.54908e+06	7.45355e+06
M140T72_1	139.527	71.8	1.2	607005	1.3577e+06	464811	905856	1.77533e+06	1.51881e+06	1.91687e+06	1.6192e+06	1.85552e+06	1.94943e+06	2.06975e+06	2.08586e+06	1.82783e+06	1.86923e+06	2.03466e+06	2.02668e+06	1.54544e+06	601676	1.45019e+06	1.79719e+06	1.54643e+06	1.60417e+06	1.82963e+06	1.64602e+06	1.61144e+06	1.64061e+06	1.611e+06	1.58845e+06	1.67029e+06	1.6693e+06	1.74845e+06
M140T74	140.143	74.4	1.2	562683	564981	665540	780749	610072	603220	626062	593832	50588.3	48382.5	47750.8	52116.9	59675.3	44589.2	59605.3	56350.4	694638	67333.8	623822	612259	681701	47902.9	42084.9	46583.8	327638	317086	327639	321453	331763	331775	331838
M140T752	140.068	752.1	12.5	1.97709e+06	65003.6	542021	1.46111e+06	178988	2.18972e+06	2.66825e+06	411121	1.42471e+06	1.28659e+06	1.32236e+06	179222	655720	479048	2.14789e+06	1.37742e+06	982060	1.63768e+06	277083	2.35816e+06	1.49196e+06	1.54591e+06	208676	1.55151e+06	964086	2.53823e+06	1.88197e+06	2.10832e+06	1.92083e+06	1.92999e+06	2.10574e+06
M140T77	140.068	76.8	1.3	990446	1.04727e+06	1.11889e+06	1.17028e+06	1.04027e+06	1.0952e+06	1.15438e+06	1.06728e+06	1.43503e+06	1.58436e+06	1.68503e+06	1.72675e+06	1.43701e+06	1.64857e+06	1.72309e+06	1.78656e+06	1.25889e+06	1.61131e+06	1.26908e+06	1.28475e+06	1.17145e+06	1.23491e+06	1.17936e+06	1.19095e+06	1.16892e+06	1.19492e+06	1.19138e+06	1.19838e+06	1.18669e+06	1.19989e+06	1.24343e+06
M140T770	140.068	770.3	12.8	1.14438e+07	1.49698e+07	4.83521e+06	1.21455e+07	7.78195e+06	7.65081e+06	1.12643e+07	3.14411e+06	3.64071e+06	5.58762e+06	9.11695e+06	3.45165e+06	8.87794e+06	1.41758e+07	5.65015e+06	5.04352e+06	1.3551e+07	1.41932e+07	1.0483e+07	2.39364e+07	3.5889e+06	6.74495e+06	4.52347e+06	1.41333e+07	8.80884e+06	6.02604e+06	9.49738e+06	7.68861e+06	9.31043e+06	9.30701e+06	9.32347e+06
M140T778	140.068	778.3	13	5.96411e+06	3.11469e+06	4.72916e+06	6.88693e+06	5.89804e+06	2.177e+06	2.81136e+06	3.39426e+06	3.40087e+06	6.84675e+06	5.10436e+06	5.19265e+06	7.20406e+06	5.11781e+06	6.68311e+06	6.66723e+06	3.33926e+06	7.54275e+06	8.14858e+06	2.4268e+06	3.42185e+06	5.27429e+06	6.13187e+06	7.8379e+06	4.06638e+06	4.00624e+06	4.80998e+06	3.99929e+06	4.0236e+06	4.25018e+06	4.01196e+06
M140T806	139.988	805.7	13.4	6.0816e+07	5.18708e+07	5.71219e+07	7.03539e+07	3.76483e+07	2.16473e+07	4.95374e+07	3.46222e+07	9.87694e+07	7.56035e+07	1.06082e+08	4.18058e+07	5.14035e+07	1.29134e+08	6.49623e+07	1.19926e+08	5.47336e+07	4.97901e+07	1.23877e+08	6.61466e+07	9.26529e+07	4.72595e+07	5.95181e+07	9.11101e+07	5.66202e+07	7.54264e+07	6.9022e+07	5.64839e+07	6.11602e+07	5.64914e+07	5.63395e+07
M141T103	141.066	103.4	1.7	1.19351e+08	7.7066e+07	6.99436e+07	1.34057e+08	6.14958e+07	5.2766e+07	8.56284e+07	6.80155e+07	9.06479e+07	7.88673e+07	8.3057e+07	9.05068e+07	4.49944e+07	7.81085e+07	7.69023e+07	7.70618e+07	8.79989e+07	7.97702e+07	9.1778e+07	7.21506e+07	7.57677e+07	6.70842e+07	6.05343e+07	9.73495e+07	6.19841e+07	6.38654e+07	6.37782e+07	6.38324e+07	6.38711e+07	6.18476e+07	6.18247e+07
M141T104	140.995	103.6	1.7	1.23283e+06	2.39336e+06	1.54203e+06	2.12333e+06	2.46917e+06	1.44066e+06	1.35531e+06	1.38547e+06	1.61346e+06	2.16502e+06	1.23861e+06	2.37519e+06	1.72996e+06	2.41601e+06	3.07434e+06	1.23958e+06	1.35146e+06	795480	853278	1.58616e+06	1.09509e+06	1.83495e+06	666628	1.2298e+06	1.63194e+06	2.14892e+06	1.75291e+06	1.79474e+06	1.58203e+06	1.5671e+06	1.79096e+06
M141T111	141.085	111.2	1.9	251326	122928	123842	209543	193804	72922.2	108161	238987	635458	272492	339711	134371	570832	206697	264232	199603	155421	333000	468680	340241	343956	321707	313412	113538	300503	217561	317652	186827	304365	285236	305380
M141T130	140.981	129.5	2.2	7.70858e+06	8.10678e+06	8.19675e+06	7.42269e+06	1.05355e+07	1.09057e+07	9.43747e+06	9.40396e+06	1.02473e+07	8.93249e+06	8.42758e+06	1.1214e+07	9.66185e+06	8.28369e+06	8.9392e+06	9.55754e+06	7.4558e+06	7.20379e+06	8.70652e+06	9.04884e+06	7.62873e+06	1.14158e+07	9.62511e+06	7.47884e+06	8.44319e+06	8.77983e+06	8.86349e+06	9.05899e+06	9.05203e+06	8.86528e+06	9.45291e+06
M141T34	140.984	34.2	0.6	1.80958e+07	1.35939e+07	1.5185e+07	1.20449e+07	1.63223e+07	1.27699e+07	1.47111e+07	1.26851e+07	1.40975e+07	1.2318e+07	1.5599e+07	1.41807e+07	1.61601e+07	1.13406e+07	1.22252e+07	1.22258e+07	1.47732e+07	1.23919e+07	1.64373e+07	1.45944e+07	1.23773e+07	1.4053e+07	1.14343e+07	1.46148e+07	1.29818e+07	1.30673e+07	1.37635e+07	1.37499e+07	1.37494e+07	1.36472e+07	1.37498e+07
M141T364	141.074	364.4	6.1	445566	299498	438244	40702.8	495181	48109.2	801601	302892	588230	35552.1	583488	274346	13090.7	17060.5	15401.1	22225.6	257511	6723.58	28730	213169	35790.8	302167	26971.4	389778	81958.2	227714	227606	241283	241175	241610	231801
M141T398	141.139	398.2	6.6	1.70926e+06	1.37924e+06	2.04934e+06	2.24312e+06	1.30624e+06	2.36081e+06	2.9872e+06	2.17293e+06	3.39695e+06	1.79419e+06	1.90916e+06	2.2484e+06	3.46825e+06	2.42125e+06	2.7701e+06	3.05982e+06	2.78762e+06	3.65727e+06	1.63355e+06	2.09553e+06	992913	3.71447e+06	1.69784e+06	1.94068e+06	1.53704e+06	1.53857e+06	1.57832e+06	1.27114e+06	1.48478e+06	1.53835e+06	1.39347e+06
M141T400	141.01	399.5	6.7	3.54196e+06	2.90637e+06	1.57644e+06	2.70964e+06	2.30043e+06	3.10513e+06	2.32766e+06	3.38268e+06	2.74542e+06	2.93881e+06	2.82384e+06	2.67414e+06	3.60541e+06	1.90088e+06	3.63208e+06	3.02895e+06	2.07243e+06	1.36337e+06	1.73153e+06	3.25258e+06	3.12249e+06	2.17065e+06	3.60618e+06	1.85417e+06	2.45015e+06	2.6028e+06	1.70614e+06	2.21199e+06	3.77985e+06	2.20081e+06	2.43641e+06
M141T64	140.984	63.6	1.1	9.86979e+06	1.84195e+07	1.69839e+07	8.57207e+06	1.72286e+07	1.84206e+07	1.91768e+07	1.95091e+07	1.71801e+07	1.7709e+07	1.58839e+07	1.65869e+07	1.77863e+07	1.75134e+07	1.61994e+07	1.71516e+07	1.69816e+07	1.81461e+07	1.75592e+07	1.72608e+07	1.71962e+07	1.82733e+07	1.82805e+07	1.67828e+07	1.68884e+07	1.76582e+07	1.66428e+07	1.77065e+07	1.72417e+07	1.75775e+07	1.82302e+07
M141T679	141.066	679.1	11.3	801113	1.32962e+06	801980	430288	1.13242e+06	281646	787339	1.30718e+06	316289	392593	1.09082e+06	735725	503689	708172	487754	701095	617523	136223	53254	1.00017e+06	897511	310019	517591	465108	974519	953671	1.04907e+06	1.21342e+06	1.04662e+06	953418	685276
M141T72_2	141.051	71.8	1.2	9.10315e+06	1.27738e+07	1.57046e+07	8.44815e+06	1.36961e+07	1.32303e+07	1.33686e+07	1.13004e+07	1.67884e+07	1.26605e+07	1.60553e+07	1.28261e+07	1.20684e+07	1.33229e+07	1.271e+07	1.2208e+07	1.2494e+07	2.07291e+07	1.19894e+07	1.4128e+07	1.09943e+07	1.31892e+07	1.02069e+07	1.23572e+07	1.10709e+07	1.10849e+07	1.10538e+07	1.10914e+07	1.42943e+07	1.30265e+07	1.16403e+07
M141T728	141.091	727.9	12.1	788475	362491	1.27177e+06	1.1774e+06	365265	174980	779796	1.06589e+06	1.98114e+06	585725	1.45451e+06	600290	602658	1.14423e+06	611357	511317	1.65265e+06	583453	738244	1.10902e+06	844827	990035	746297	838181	803458	996262	815181	927206	820227	658355	877946
M141T770	141.091	769.7	12.8	1.73367e+06	1.41509e+06	1.47136e+06	1.80669e+06	1.29951e+06	1.59168e+06	1.79751e+06	1.97124e+06	1.75988e+06	1.52529e+06	1.44049e+06	1.80514e+06	2.16651e+06	2.53265e+06	1.66937e+06	2.00984e+06	1.29582e+06	2.28478e+06	2.21124e+06	1.23799e+06	1.963e+06	2.21579e+06	1.86789e+06	1.87613e+06	1.94234e+06	1.94898e+06	1.59067e+06	1.23554e+06	1.96474e+06	1.83451e+06	1.93687e+06
M141T807	140.994	807.3	13.5	1.94492e+06	1.48629e+06	5.52623e+06	3.49038e+06	4.51145e+06	4.4487e+06	2.04502e+06	2.04502e+06	4.24171e+06	3.92884e+06	7.8808e+06	5.29541e+06	5.17256e+06	2.88761e+06	5.32032e+06	5.15574e+06	4.65118e+06	3.15799e+06	4.98763e+06	2.68072e+06	6.6778e+06	3.96956e+06	1.83582e+06	2.86591e+06	4.42418e+06	4.44003e+06	4.18102e+06	3.77951e+06	4.43503e+06	4.24106e+06	4.43118e+06
M142T103_1	142.069	103.4	1.7	6.52479e+06	6.22533e+06	6.02282e+06	317558	1.71345e+06	3.20883e+06	6.31514e+06	4.23312e+06	4.54778e+06	1.55661e+06	1.59051e+06	1.62489e+06	6.89164e+06	942298	3.58239e+06	6.62966e+06	3.52345e+06	1.86751e+06	3.61676e+06	5.25473e+06	1.61798e+06	2.5654e+06	3.533e+06	6.67647e+06	4.97335e+06	4.11519e+06	3.6914e+06	3.72649e+06	6.34862e+06	3.44802e+06	3.49044e+06
M142T129	141.979	129.4	2.2	1.20539e+07	3.27587e+07	8.22596e+06	3.33514e+07	1.12521e+07	6.2283e+06	7.05872e+06	4.86083e+06	7.21681e+06	3.64991e+06	6.30792e+06	3.78598e+06	8.71999e+06	3.04731e+06	4.11414e+06	4.48627e+06	1.24319e+07	1.05067e+07	2.17145e+07	1.00015e+07	8.92738e+06	4.07833e+06	8.41026e+06	1.00391e+07	9.83531e+06	9.8874e+06	9.75128e+06	1.02598e+07	9.75211e+06	9.09977e+06	9.7556e+06
M142T135	141.958	135.1	2.3	1.95198e+07	1.42656e+07	1.52638e+07	1.37466e+07	2.14618e+07	8.61138e+06	2.28325e+07	1.43639e+07	1.69728e+07	4.45643e+07	2.60297e+07	3.18163e+07	3.68045e+07	2.52985e+07	5.17838e+07	3.39099e+07	5.10638e+07	2.39291e+07	7.00455e+07	3.19631e+07	3.45089e+07	1.46156e+07	1.67351e+07	3.0339e+07	2.40514e+07	2.40646e+07	2.52144e+07	2.41389e+07	3.1496e+07	2.42158e+07	2.55788e+07
M142T275	141.957	275.2	4.6	5.48464e+06	9.158e+06	5.49592e+06	8.88773e+06	6.66883e+06	1.02612e+07	9.02423e+06	8.88369e+06	1.00718e+07	1.1602e+07	1.11502e+07	9.48118e+06	9.57448e+06	1.28477e+07	1.19832e+07	1.2416e+07	9.78387e+06	1.37493e+07	9.33477e+06	7.91199e+06	8.2244e+06	1.09512e+07	8.7889e+06	1.08103e+07	8.69689e+06	8.49029e+06	8.02373e+06	8.00718e+06	8.01754e+06	8.60543e+06	9.1938e+06
M142T287	141.959	287.4	4.8	2.23075e+07	99084.1	999150	2.7255e+07	2.06159e+07	1.39403e+07	493665	178840	2.99995e+07	2.4196e+07	93932.6	292970	175630	219523	178186	228907	68565.1	338841	1.44053e+07	181249	62169.2	2.5533e+07	1.11833e+06	105307	1.16492e+07	1.19085e+07	1.21825e+07	1.18922e+07	1.21788e+07	1.36319e+07	1.19006e+07
M142T310	142.123	310.1	5.2	1.61305e+06	1891.97	1690.35	2.32638e+06	2.15777e+06	1.63782e+06	2218.41	2179.46	2.3287e+06	1.45245e+06	1714.18	1702.56	1826.34	1788.82	1124.68	1784.59	918.246	1280.51	2.07419e+06	1899.29	127829	1.64582e+06	1553.45	1356.47	843950	843459	891829	823284	823424	844855	807035
M142T34	141.978	34.2	0.6	9.35303e+06	2.51837e+07	2.81237e+07	7.90399e+06	2.93226e+07	1.9019e+07	2.62161e+07	2.01202e+07	2.82961e+07	2.4501e+07	3.44207e+07	2.95367e+07	2.08792e+07	2.28292e+07	2.46355e+07	2.62733e+07	2.97527e+07	2.48765e+07	3.6596e+07	3.26727e+07	2.5395e+07	2.57742e+07	2.65318e+07	2.56269e+07	2.45906e+07	2.33424e+07	2.31987e+07	2.51344e+07	2.57556e+07	2.42278e+07	2.45764e+07
M142T35	141.958	35.2	0.6	1.06828e+08	1.03365e+08	1.04664e+08	1.13914e+08	1.04395e+08	1.16591e+08	9.50938e+07	8.97895e+07	2.85107e+07	6.94189e+07	3.5119e+07	4.23326e+07	4.02237e+07	4.65324e+07	5.27837e+07	4.0723e+07	1.06554e+08	3.06003e+07	1.11054e+08	1.29757e+08	1.2707e+08	4.4896e+07	5.09099e+07	5.01779e+07	7.05112e+07	7.5817e+07	7.77823e+07	7.11435e+07	7.57498e+07	7.4574e+07	7.57361e+07
M142T356	142.061	356.2	5.9	619968	1.11069e+06	791361	798042	772469	573582	625213	753055	1.3115e+06	1.06685e+06	1.04128e+06	2.30628e+06	3.47002e+06	959442	1.12728e+06	1.22392e+06	1.34127e+06	3.72986e+06	1.75259e+06	844159	754944	125237	1.05333e+06	766981	1.00622e+06	1.01073e+06	1.09738e+06	1.05472e+06	1.00791e+06	1.02288e+06	1.01053e+06
M142T485	142.123	485	8.1	457321	112106	135468	132594	253116	451761	114690	113353	205352	142876	308494	175158	151395	144487	204634	639898	602853	484004	162136	597920	428808	156800	136094	357685	524656	526890	524636	577746	414792	524829	540291
M142T625	142.123	625	10.4	457779	343408	444973	550126	460504	557871	476375	589879	557732	628358	786560	671371	361334	404978	429224	341304	527342	457572	251509	246064	534546	416384	204079	286786	542051	538344	438832	456464	475479	434083	401879
M142T63	141.978	63.3	1.1	1.18442e+07	9.85319e+07	1.7472e+07	1.42082e+07	6.80798e+06	3.75565e+07	1.60333e+08	5.79622e+07	8.64015e+07	1.00455e+08	1.68284e+08	1.12569e+08	3.37554e+07	5.8471e+07	2.1133e+07	5.63154e+07	5.1692e+07	1.63627e+07	7.51113e+07	6.56084e+07	4.73595e+07	1.02387e+08	5.86144e+07	9.36534e+07	2.51316e+07	2.70039e+07	3.05474e+07	3.05396e+07	2.70519e+07	4.23484e+07	3.10592e+07
M142T709	142.159	709.3	11.8	364188	118019	139615	369131	276026	265140	51655.6	117223	142691	559835	65595.3	151366	239301	161225	160080	54279.3	130440	130020	195299	166831	87053.5	588627	191012	48544.1	362061	301232	366209	344743	346519	378961	241534
M142T72_1	142.035	71.8	1.2	1.05456e+07	9.14938e+06	1.04939e+07	1.05134e+07	1.02538e+07	1.02098e+07	1.04164e+07	9.51487e+06	9.83488e+06	8.90107e+06	1.00461e+07	9.80051e+06	1.09174e+07	9.89904e+06	9.86485e+06	9.4402e+06	9.96776e+06	1.31849e+07	1.49616e+07	1.11743e+07	9.32548e+06	9.83708e+06	1.03615e+07	9.14773e+06	9.98507e+06	1.02785e+07	1.00928e+07	1.03889e+07	1.06068e+07	1.00971e+07	1.0289e+07
M142T72_2	142.052	71.5	1.2	986178	721892	885560	770211	697409	674944	838579	887876	1.08368e+06	1.31459e+06	1.06043e+06	1.04936e+06	1.18994e+06	1.4285e+06	1.22901e+06	1.12982e+06	1.10285e+06	1.22911e+06	1.14465e+06	1.1815e+06	1.28608e+06	1.037e+06	1.08117e+06	1.22604e+06	1.00317e+06	1.09203e+06	1.0581e+06	1.10425e+06	1.1042e+06	1.12837e+06	1.10435e+06
M142T807	141.983	806.7	13.4	2.99826e+07	3.06962e+07	3.06058e+07	5.12091e+07	3.96755e+07	2.07967e+07	3.21866e+07	5.29506e+07	6.2162e+07	4.08481e+07	4.39579e+07	6.03382e+07	5.68702e+07	4.1752e+07	1.70363e+07	4.42976e+07	3.08317e+07	5.97287e+07	6.54389e+07	4.44876e+07	2.99419e+07	2.55067e+07	2.60544e+07	7.95844e+07	2.43444e+07	2.65647e+07	2.47071e+07	4.38545e+07	2.4614e+07	2.4427e+07	2.44122e+07
M142T808	141.957	808	13.5	4.34278e+07	4.64669e+07	4.56791e+07	6.14977e+07	1.9288e+07	2.93287e+07	3.88244e+07	3.25779e+07	2.36012e+07	5.1004e+07	6.15871e+07	4.82117e+07	2.2999e+07	6.24882e+07	4.28324e+07	5.74724e+07	3.46288e+07	7.46765e+07	2.56103e+07	3.10209e+07	5.46963e+07	3.06122e+07	4.92505e+07	5.09909e+07	5.2798e+07	4.32701e+07	2.59485e+07	4.47426e+07	4.06654e+07	4.09523e+07	3.97895e+07
M142T828	142.21	828.3	13.8	2.43076e+06	3.71927e+06	3.31612e+06	4.97002e+06	2.27419e+06	3.36141e+06	1.71604e+06	4.17951e+06	6.19035e+06	5.43609e+06	5.29083e+06	6.41171e+06	4.05026e+06	7.04035e+06	5.39261e+06	4.61262e+06	4.00167e+06	3.55491e+06	3.62053e+06	4.42855e+06	4.19106e+06	2.49078e+06	4.56958e+06	3.68638e+06	4.32728e+06	4.53047e+06	4.38885e+06	3.9273e+06	4.38433e+06	4.3871e+06	4.27652e+06
M142T85	142.026	84.5	1.4	1.14415e+07	1.21607e+07	1.3032e+07	1.43536e+07	1.1919e+07	1.01954e+07	1.5567e+07	1.36239e+07	5.34064e+06	1.7834e+07	4.29361e+06	1.16053e+07	4.41785e+06	2.05832e+07	1.62499e+07	1.29682e+07	1.43468e+07	4.18948e+06	1.76968e+07	3.98984e+06	1.46116e+07	1.29191e+07	1.41817e+07	1.88096e+07	1.13348e+07	1.13342e+07	5.2617e+06	1.21131e+07	1.06441e+07	1.1367e+07	1.07132e+07
M143T109	143.082	109.2	1.8	620580	781189	227155	852737	716363	554259	683820	719521	712535	79008.8	82128.7	93285	201612	370606	784581	1.05049e+06	745402	132341	159261	956640	975265	844282	160123	955163	728134	792140	777734	727394	728132	783795	319968
M143T137	142.982	136.9	2.3	2.54039e+06	7.35091e+06	6.23375e+06	3.68875e+06	5.70533e+06	4.08808e+06	7.34234e+06	7.01418e+06	3.90944e+06	5.12269e+06	3.38933e+06	5.14359e+06	3.97144e+06	4.9434e+06	4.12184e+06	4.28972e+06	8.67131e+06	3.22797e+06	9.08743e+06	7.54809e+06	9.23763e+06	3.62404e+06	3.08048e+06	5.1702e+06	5.36422e+06	5.43932e+06	5.36564e+06	5.36502e+06	5.44329e+06	5.44461e+06	5.4433e+06
M143T203	142.982	203	3.4	2.39993e+06	2.31385e+06	2.10493e+06	2.43654e+06	2.56971e+06	2.45776e+06	2.47722e+06	2.47317e+06	2.28765e+06	2.38738e+06	2.93669e+06	2.98359e+06	2.48505e+06	2.46834e+06	2.50155e+06	2.56222e+06	2.20882e+06	2.75776e+06	2.50687e+06	2.31737e+06	2.09909e+06	2.82035e+06	2.13185e+06	2.51648e+06	2.40066e+06	2.4028e+06	2.35674e+06	2.4013e+06	2.29427e+06	2.4028e+06	2.1085e+06
M143T519	143.118	519.3	8.7	310610	238469	217952	425064	205279	316895	214420	347903	257571	209118	190338	196277	383818	305560	404573	210638	297456	333662	421871	413338	272104	211453	193728	297658	317070	268049	183354	242855	262288	263737	250603
M143T542	143.107	542.1	9	1.28106e+06	2.01982e+06	1.7997e+06	1.35001e+06	1.87615e+06	2.14316e+06	1.96667e+06	1.2138e+06	2.18718e+06	1.12806e+06	1.81512e+06	828084	1.81611e+06	3.02797e+06	872940	2.02182e+06	5.14981e+06	2.23943e+06	4.6713e+06	2.90805e+06	3.65414e+06	2.19669e+06	2.15449e+06	2.39416e+06	1.71592e+06	1.04814e+06	1.20559e+06	1.2186e+06	1.32369e+06	1.32225e+06	1.32725e+06
M143T652	143.07	652.2	10.9	257823	186721	414490	362405	247343	139401	1.26204e+06	686668	424358	379771	491950	403678	655868	978989	235619	228940	301086	413447	286141	655945	502062	644076	358097	300550	1.03951e+06	970822	919038	482004	918457	973086	917670
M143T68	142.96	68.2	1.1	2.54086e+06	448485	2.58416e+06	2.59037e+06	945991	2.39199e+06	2.07704e+06	303745	565119	3.19018e+06	2.83654e+06	2.31046e+06	1.88378e+06	2.48653e+06	2.22336e+06	1.5062e+06	2.58384e+06	603275	642376	4.02501e+06	647039	2.53927e+06	2.84116e+06	556708	2.11486e+06	1.3915e+06	1.34727e+06	2.7029e+06	1.67421e+06	2.47618e+06	1.86789e+06
M143T72	143.048	71.8	1.2	3.27301e+06	4.92448e+06	2.50791e+06	2.18024e+06	1.23625e+06	1.20505e+06	2.35411e+06	2.45456e+06	1.48479e+06	3.76253e+06	1.17319e+06	1.16072e+06	2.84964e+06	1.25399e+06	1.32687e+06	1.29959e+06	1.21234e+06	1.12923e+06	7.83868e+06	5.0898e+06	1.24728e+06	1.7782e+06	1.14129e+06	4.81225e+06	1.70394e+06	1.70786e+06	1.71538e+06	1.70664e+06	1.93598e+06	1.79507e+06	2.17524e+06
M143T82	142.948	82.1	1.4	1.47244e+07	1.85348e+07	2.56423e+07	1.41766e+07	3.06171e+07	4.71826e+07	2.17179e+07	1.7898e+07	2.30056e+07	1.46743e+07	1.78965e+07	3.00747e+07	1.98367e+07	1.25437e+07	1.39916e+07	1.4154e+07	9.64608e+06	9.43871e+06	1.29699e+07	1.44891e+07	1.16558e+07	1.97037e+07	1.99556e+07	7.30707e+06	1.69047e+07	1.62517e+07	1.66887e+07	1.53105e+07	1.61698e+07	1.62337e+07	1.70433e+07
M143T99	143.081	99.4	1.7	3.73632e+06	856738	1.14295e+06	1.1603e+06	2.94589e+06	2.70291e+06	1.82907e+06	1.21549e+06	2.67688e+06	3.02204e+06	2.76997e+06	2.66733e+06	2.95955e+06	777775	3.02064e+06	2.95563e+06	2.5572e+06	2.85111e+06	988969	3.10343e+06	1.03205e+06	3.54227e+06	3.80829e+06	801337	1.12379e+06	2.87373e+06	2.8882e+06	2.88501e+06	2.72032e+06	2.87792e+06	2.73109e+06
M144T101	144.102	100.6	1.7	4.58117e+07	4.31043e+07	5.30028e+07	4.25933e+07	4.72397e+07	4.54173e+07	4.18168e+07	4.98356e+07	3.94906e+07	4.32898e+07	4.67539e+07	4.25246e+07	4.14612e+07	4.21986e+07	4.11758e+07	4.02684e+07	5.12012e+07	4.87775e+07	4.77539e+07	4.26978e+07	4.46038e+07	4.61834e+07	4.41266e+07	4.18397e+07	4.7953e+07	4.73525e+07	4.30334e+07	4.55446e+07	4.61213e+07	4.54008e+07	4.88649e+07
M144T315_1	143.946	314.8	5.2	301834	1.34282e+06	1.07037e+06	747413	555611	460715	983845	270795	979923	367056	1.17073e+06	348406	1.05156e+06	907885	1.06573e+06	1.16262e+06	1.3596e+06	1.08438e+06	718908	914495	1.2876e+06	1.08256e+06	1.25984e+06	1.03397e+06	949843	955830	630985	759111	946072	867240	993361
M144T315_2	144.048	314.8	5.2	9.84377e+08	9.22678e+08	1.18549e+09	1.47242e+09	1.65961e+09	4.82087e+08	1.44336e+09	1.05191e+09	1.40643e+09	3.04624e+09	3.10675e+09	1.81544e+09	2.30657e+09	2.60143e+09	1.34859e+09	1.37582e+09	1.94011e+09	1.95176e+09	2.17688e+09	2.42297e+09	1.70709e+09	1.08529e+09	1.62247e+09	1.65258e+09	1.23718e+09	1.56421e+09	1.62903e+09	1.63223e+09	1.764e+09	1.57038e+09	1.63016e+09
M144T315_3	144.15	314.7	5.2	1.20208e+07	6.58252e+06	2.22036e+06	1.04561e+07	4.73596e+06	6.46075e+06	1.24724e+07	7.90397e+06	1.00131e+07	1.31193e+07	1.44555e+07	1.03886e+07	2.0148e+07	1.16963e+07	1.5016e+07	1.79624e+07	9.02624e+06	1.30222e+07	1.76824e+07	1.59851e+07	8.85636e+06	1.13062e+07	1.00253e+07	1.75315e+07	8.98581e+06	8.96477e+06	8.70054e+06	8.86404e+06	8.87228e+06	4.2538e+06	5.868e+06
M144T397	144.081	397.1	6.6	5.11967e+06	486916	964669	4.81388e+06	4.03487e+06	424563	4.7576e+06	951201	4.54617e+06	657656	4.02462e+06	3.29364e+06	9.37629e+06	449261	5.35275e+06	1.72953e+06	6.5604e+06	8.17403e+06	9.32167e+06	3.61471e+06	1.06402e+06	3.72094e+06	7.68957e+06	5.25742e+06	2.28307e+06	2.02408e+06	2.28224e+06	2.23329e+06	2.62897e+06	2.62785e+06	3.47835e+06
M144T428	144.081	427.8	7.1	5.47508e+06	6.8167e+06	1.03938e+07	3.50755e+06	1.82288e+07	3.20245e+07	8.41538e+06	2.10684e+06	8.61442e+06	1.01873e+06	5.30178e+06	1.12092e+07	9.85871e+06	752978	7.36268e+06	6.5124e+06	336613	948320	547284	5.31781e+06	2.32079e+06	8.127e+06	6.57971e+06	61006.2	6.07296e+06	6.13142e+06	6.12818e+06	3.66217e+06	5.90285e+06	6.1442e+06	6.14592e+06
M144T464	144.175	464.3	7.7	315.841	928.009	1043.11	1030.04	21681.2	286.971	337.879	61913.2	53460.1	246194	31673.6	53387.7	362832	129701	173248	129837	321438	757998	580841	459.146	219409	82304.4	335591	482174	239890	214665	239896	239854	213967	234668	244033
M144T570	143.552	569.7	9.5	94580.8	1242.66	641.891	107018	75083.7	79597	320.485	568.633	77159.9	86459.7	1348.58	1833.26	301.504	321.162	3723.87	2523.27	311.394	894.575	105499	287.36	249.039	107994	1369.64	2275.56	43408	35542.1	45341.8	43366.8	45762	45319.6	45279.3
M144T597	144.175	597.3	10	233785	76511.9	517916	184799	400256	171034	418878	847700	196373	295841	516986	118563	105409	179795	210607	478911	138092	89962	410885	131120	131338	452846	100214	694874	354273	381134	213055	378883	411517	301088	378839
M144T663	144.138	663.2	11.1	4.04493e+06	442569	1.4304e+06	601306	4.80935e+06	4.27333e+06	855890	771618	4.2813e+06	1.83267e+06	1.32039e+06	1.56792e+06	4.62399e+06	677240	912369	890739	954552	4.04414e+06	1.55005e+06	2.72917e+06	3.86152e+06	3.86646e+06	693929	1.20919e+06	1.47726e+06	1.15016e+06	1.31806e+06	1.47525e+06	1.10136e+06	2.16462e+06	1.15273e+06
M144T689	144.138	688.5	11.5	2.72858e+06	450809	1.78617e+06	1.6189e+06	4.04926e+06	1.72978e+06	1.62957e+06	2.19039e+06	4.21292e+06	3.06664e+06	4.11429e+06	4.15545e+06	2.47626e+06	4.60047e+06	2.04991e+06	4.61947e+06	1.65107e+06	3.35713e+06	6.24962e+06	5.95152e+06	5.04745e+06	4.70382e+06	5.14202e+06	2.49497e+06	3.11584e+06	2.67483e+06	3.0333e+06	3.70548e+06	3.48963e+06	3.47519e+06	3.22678e+06
M144T72_1	143.997	72.2	1.2	1.69569e+07	5.50812e+07	1.71578e+06	2.88294e+07	1.7154e+07	1.75715e+07	5.56852e+07	1.80223e+07	3.72453e+07	2.9286e+07	1.82936e+07	1.87339e+07	6.41808e+07	2.83732e+07	7.07526e+07	6.51684e+07	5.41181e+07	2.07461e+07	1.96763e+07	1.88404e+07	2.24768e+07	3.6489e+07	1.88993e+07	3.29552e+07	2.73414e+07	2.73893e+07	2.7365e+07	2.73847e+07	2.97038e+07	2.98324e+07	2.9781e+07
M144T98	144.065	98.1	1.6	1.7733e+06	1.99592e+06	2.09031e+06	3.86766e+06	4.50704e+06	1.61289e+06	2.01036e+06	4.02663e+06	5.90631e+06	6.11946e+06	8.06612e+06	6.19962e+06	5.75661e+06	5.63295e+06	5.88835e+06	5.80152e+06	7.34578e+06	7.42438e+06	7.6854e+06	5.09497e+06	6.58729e+06	6.2442e+06	6.01785e+06	6.55637e+06	5.03346e+06	4.89173e+06	5.24246e+06	4.26203e+06	5.23069e+06	5.23425e+06	5.23191e+06
M145T109	144.961	109.3	1.8	394664	5.63147e+06	2.99683e+06	2.27062e+06	2.62404e+06	4.32633e+06	3.29104e+06	3.52088e+06	545875	2.96313e+06	2.57927e+06	608000	327740	529482	487226	1.671e+06	2.82939e+06	496691	3.00139e+06	498586	3.24026e+06	683713	621476	3.0766e+06	2.89543e+06	2.62752e+06	2.74452e+06	2.42187e+06	2.73872e+06	2.6508e+06	3.21242e+06
M145T121	145.05	121.2	2	1.39058e+07	8.38894e+06	1.44994e+07	7.98853e+06	1.42724e+07	1.049e+07	2.14078e+07	1.78818e+07	1.23917e+07	1.74177e+07	1.59367e+07	1.44775e+07	1.8418e+07	1.70213e+07	1.60427e+07	1.92978e+07	1.63167e+07	1.80718e+07	1.8899e+07	1.51223e+07	1.62744e+07	1.52677e+07	1.25566e+07	1.32701e+07	1.44383e+07	1.55066e+07	1.48703e+07	1.39864e+07	1.57048e+07	1.51742e+07	1.49429e+07
M145T315	145.051	314.7	5.2	3.02047e+09	3.52039e+09	6.01716e+08	1.57307e+10	2.09679e+08	3.98385e+09	4.15611e+09	1.49129e+10	7.06105e+08	3.41695e+09	1.04778e+08	5.14192e+08	2.16673e+08	1.08342e+10	1.20088e+09	3.39599e+08	1.22575e+09	2.37926e+09	3.61707e+09	2.24102e+09	1.09545e+09	7.43936e+09	4.97151e+09	7.69892e+08	7.6766e+07	1.13649e+08	1.00865e+08	1.18044e+08	1.04202e+08	9.45681e+07	1.42502e+08
M145T34	145.049	33.6	0.6	1.76613e+07	1.73035e+07	1.77464e+07	1.61272e+07	1.56701e+07	1.5071e+07	1.70813e+07	1.65147e+07	2.09896e+07	2.02275e+07	2.22155e+07	2.17588e+07	2.39801e+07	1.71361e+07	2.11742e+07	2.09848e+07	2.08418e+07	2.82275e+07	2.52685e+07	2.05276e+07	2.01779e+07	1.63365e+07	1.78926e+07	2.30019e+07	1.91562e+07	1.92326e+07	1.90386e+07	1.9427e+07	1.96465e+07	1.91562e+07	1.91562e+07
M145T552	145.123	552	9.2	945562	976155	959290	827200	205269	1.00706e+06	920531	1.00028e+06	1.14522e+06	914282	1.03327e+06	878645	925377	1.14971e+06	882455	902578	1.11329e+06	1.86001e+06	905656	866750	445972	1.04128e+06	836455	1.51151e+06	882368	903881	903444	901455	906845	777166	780611
M145T64	145.049	64.2	1.1	4.02048e+06	5.82021e+06	7.3725e+06	4.92974e+06	5.81098e+06	3.8608e+07	2.97873e+06	3.55146e+07	7.43881e+06	8.93566e+06	1.24428e+07	9.7209e+06	1.34051e+07	1.03827e+07	2.18656e+06	5.76383e+06	7.43318e+06	8.24357e+06	1.55059e+07	4.33915e+06	1.9189e+07	1.25377e+07	6.05801e+06	2.5914e+07	8.67132e+06	8.8594e+06	9.07897e+06	1.12958e+07	1.33525e+07	1.30678e+07	1.31186e+07
M145T682	145.123	681.7	11.4	529918	1.3924e+06	392883	1.3621e+06	488079	375524	123172	317698	231315	48860.1	251227	47268.7	295774	71888.2	194504	68703.5	550166	443307	523556	411618	469591	42809.8	361284	379870	423661	423794	423481	423519	411955	383140	393230
M145T688	145.142	688.4	11.5	301486	26637.3	85933.7	145520	205729	116712	127650	165573	315923	309321	240619	206499	111452	318185	305780	261396	125238	164615	142412	412345	170530	259124	312921	234271	144888	125125	169904	174805	204703	144846	164465
M145T76	145.097	75.8	1.3	823742	999846	608530	1.143e+06	1.63359e+06	961326	686837	1.37397e+06	977342	328672	1.01984e+06	1.05871e+06	414651	472633	573203	750459	1.0573e+06	816132	1.63224e+06	969915	1.17701e+06	412370	834522	1.19154e+06	352389	545206	544936	605335	548579	504750	504495
M145T815	144.982	815.3	13.6	1.62483e+07	5.70895e+07	4.06357e+07	7.02644e+07	3.42609e+07	2.96445e+07	5.288e+07	4.88684e+07	1.33316e+07	3.85809e+07	2.67046e+07	2.27114e+07	7.99644e+06	2.89673e+07	2.6004e+07	2.76745e+07	2.24502e+07	1.37244e+07	1.93197e+07	5.24529e+07	2.62661e+07	1.80534e+07	1.46152e+07	1.48459e+07	2.44394e+07	2.37079e+07	2.14719e+07	2.60343e+07	2.65486e+07	2.36905e+07	2.36186e+07
M145T89	145.05	89.1	1.5	9.44155e+06	1.02389e+07	8.51908e+06	1.06497e+07	7.51915e+06	1.15171e+07	2.98656e+06	8.79423e+06	2.02538e+07	2.00219e+07	1.83271e+07	2.73178e+07	1.30511e+07	1.23671e+07	2.36326e+07	1.47578e+07	9.34335e+06	2.14967e+07	9.20758e+06	8.06296e+06	9.92516e+06	2.69253e+07	2.01523e+07	2.16267e+07	1.4407e+07	1.24431e+07	1.30273e+07	1.32374e+07	1.31254e+07	1.30343e+07	1.33529e+07
M145T99	145.049	99.5	1.7	1.58485e+07	1.30544e+07	1.4144e+07	1.34695e+07	1.60466e+07	1.5993e+07	1.92321e+07	2.06846e+07	1.61797e+07	1.54855e+07	1.63562e+07	1.49869e+07	2.53165e+07	1.4062e+07	1.83291e+07	1.72525e+07	1.30224e+07	1.92341e+07	1.8667e+07	1.45775e+07	1.33145e+07	2.2614e+07	2.03953e+07	1.8848e+07	1.53847e+07	1.57591e+07	1.44528e+07	1.59677e+07	1.59427e+07	1.59693e+07	1.53724e+07
M146T104	146.081	104.3	1.7	2.34194e+08	1.42761e+08	1.32367e+08	2.93583e+08	1.0661e+08	1.00029e+08	1.77366e+08	1.53562e+08	1.94929e+08	1.49856e+08	1.81492e+08	1.89696e+08	2.05235e+07	1.82057e+08	1.68267e+08	1.55935e+08	1.76121e+08	1.45018e+08	1.70588e+08	1.27256e+08	1.6072e+08	1.274e+08	1.30149e+08	1.97943e+08	1.23992e+08	1.20414e+08	1.21011e+08	1.34178e+08	1.23773e+08	1.17766e+08	1.20125e+08
M146T114	146.045	113.8	1.9	2.63183e+06	2.01867e+06	1.81041e+06	2.40437e+06	2.20901e+06	2.29053e+06	1.73263e+06	2.068e+06	2.20678e+06	2.38878e+06	2.2924e+06	2.42313e+06	2.31186e+06	2.11943e+06	2.26365e+06	2.04791e+06	464484	1.66411e+06	2.19981e+06	2.37169e+06	1.30657e+06	1.39023e+06	2.315e+06	1.75563e+06	2.13504e+06	1.68729e+06	2.00696e+06	2.28896e+06	2.26216e+06	2.25588e+06	2.25627e+06
M146T115	146.118	115.2	1.9	2.06067e+07	9.91073e+07	1.39014e+07	1.57097e+07	1.25738e+07	1.09062e+07	1.50341e+07	1.41766e+07	1.06566e+07	1.68016e+07	1.02466e+07	1.3018e+07	2.13116e+07	1.37749e+07	1.10753e+07	1.02311e+07	9.49822e+06	1.14047e+07	1.53577e+07	1.85262e+07	8.56407e+06	8.80466e+06	8.26134e+06	8.85881e+06	1.48161e+07	1.60207e+07	1.58074e+07	1.60125e+07	1.58109e+07	1.60112e+07	1.60133e+07
M146T314	146.055	314.2	5.2	3.76427e+06	6.04913e+06	2.9134e+06	5.57564e+06	628331	2.98721e+06	3.00015e+06	2.77277e+06	1.00851e+06	288434	1.18996e+06	321657	110117	391169	92601.7	86499.8	1.30584e+06	164661	919877	1.36967e+06	978690	626866	819722	843143	1.71387e+06	1.7493e+06	1.68759e+06	1.73924e+06	1.87282e+06	1.67189e+06	1.71603e+06
M146T315	146.044	314.7	5.2	5.30551e+06	9.54307e+07	1.01018e+08	7.07362e+06	9.67511e+06	6.62683e+06	6.8718e+07	6.34011e+07	1.10933e+07	7.67883e+06	9.29324e+07	9.5039e+07	9.3296e+07	9.6188e+07	1.02762e+08	8.40587e+07	9.34058e+07	8.77926e+07	8.03429e+06	6.90569e+07	4.33528e+07	7.86499e+06	5.63279e+07	8.13996e+07	7.70615e+07	8.42148e+07	8.26531e+07	3.43436e+07	9.5422e+07	8.42879e+07	7.58694e+07
M146T383	146.118	382.5	6.4	2.54949e+06	3.93661e+06	2.9805e+06	4.11864e+06	97195.4	991670	2.16834e+06	1.77075e+06	1.99185e+06	550121	1.74901e+06	2.6226e+06	1.22214e+06	2.67982e+06	1.56676e+06	1.7559e+06	133872	739868	288002	1.58182e+06	400267	468050	166277	1.22443e+06	951375	661915	956459	549663	1.02032e+06	881570	954728
M146T395	146.118	395	6.6	1.94678e+06	922411	805366	1.19001e+06	671429	1.07234e+06	735273	236263	194524	168177	224990	165505	110515	349695	157297	147838	274309	141798	307054	593746	183774	385296	164713	245765	529651	498847	531079	530651	205861	496746	495138
M146T397	146.06	397.2	6.6	3.20168e+06	1.03683e+07	1.34217e+07	1.76329e+07	8.6158e+06	1.0891e+06	1.50746e+07	5.12036e+06	1.34081e+07	3.92236e+06	1.33726e+07	2.44195e+06	1.76906e+07	6.99902e+06	1.22677e+07	2.19493e+07	1.74709e+07	2.51458e+07	2.07582e+06	1.43258e+07	4.85623e+06	1.5882e+07	1.09333e+07	1.45732e+07	1.0354e+07	5.08102e+06	9.98917e+06	1.00289e+07	9.36483e+06	5.5993e+06	9.34966e+06
M146T408	146.06	407.9	6.8	2.30506e+06	1.80436e+06	779986	2.03874e+06	2.13782e+06	430185	691664	3.45433e+06	1.20538e+06	2.08241e+06	2.70743e+06	935515	723869	820815	4.05709e+06	786482	1.71953e+06	2.54642e+06	617252	605533	4.86843e+06	870591	312210	1.95451e+06	1.4906e+06	1.33103e+06	1.30975e+06	1.52118e+06	1.30156e+06	1.264e+06	1.91985e+06
M146T578	146.06	578.5	9.6	2.40551e+06	2.05538e+06	2.41546e+06	2.06113e+06	2.79464e+06	2.17209e+06	2.16008e+06	2.58259e+06	2.42979e+06	2.29436e+06	2.49648e+06	2.17093e+06	2.21957e+06	2.79007e+06	2.46778e+06	1.81524e+06	2.49571e+06	2.57454e+06	1.8851e+06	2.93758e+06	2.64007e+06	2.6194e+06	2.00324e+06	2.96545e+06	1.96188e+06	2.29191e+06	2.12555e+06	2.39286e+06	2.45855e+06	2.45196e+06	2.30142e+06
M146T66	145.607	66.5	1.1	383697	379615	317353	479198	280904	331821	491003	534569	237393	283023	322163	263688	350800	278978	258230	265914	340928	371163	343429	364758	378996	284396	254183	406213	338289	338316	341010	342223	342247	332339	363656
M146T68	146.165	68	1.1	1.96057e+06	9.42865e+06	2.42075e+06	2.35625e+06	2.48228e+06	4.91106e+06	6.85177e+06	6.76463e+06	4.65536e+06	1.997e+06	3.32931e+06	4.17211e+06	2.66516e+06	8.08632e+06	2.71212e+06	2.16542e+06	4.98333e+06	2.5072e+06	2.77898e+06	7.95888e+06	2.39237e+06	1.57347e+06	5.81917e+06	5.06568e+06	7.91394e+06	6.18473e+06	7.94269e+06	8.1294e+06	9.81232e+06	8.33623e+06	8.43768e+06
M146T72	146.03	71.7	1.2	1.81486e+07	1.56284e+07	1.79674e+07	1.47651e+07	1.67248e+07	1.65218e+07	1.87603e+07	1.78095e+07	1.67126e+07	1.67674e+07	1.58454e+07	1.50143e+07	1.61496e+07	1.67964e+07	1.57628e+07	1.66012e+07	1.50539e+07	1.54255e+07	1.46788e+07	1.68314e+07	1.50108e+07	1.61082e+07	1.56846e+07	1.37602e+07	1.62255e+07	1.61412e+07	1.60954e+07	1.65631e+07	1.62257e+07	1.61407e+07	1.64124e+07
M146T97	146.118	96.8	1.6	5.18271e+07	5.54954e+07	1.35584e+08	1.57448e+08	6.22676e+07	4.40961e+07	7.15008e+07	1.99866e+08	2.67582e+08	7.17966e+07	1.32312e+08	2.70688e+08	2.70497e+08	3.29361e+08	2.28164e+08	3.36256e+08	2.34987e+08	2.96269e+08	6.6141e+07	2.86353e+08	5.92637e+07	2.0534e+08	3.02954e+08	2.7129e+08	1.34278e+08	1.32885e+08	1.73776e+08	2.06047e+08	2.25592e+08	1.16234e+08	1.44357e+08
M147T113	147.077	113.2	1.9	1.23849e+07	1.21762e+07	1.90246e+07	5.9132e+06	4.01072e+07	1.9389e+07	4.75434e+07	3.56778e+07	4.82073e+07	5.07752e+07	4.93926e+07	4.94785e+07	4.35522e+07	4.50321e+07	4.73555e+07	4.80851e+07	5.67906e+07	5.24027e+07	6.81572e+07	5.81004e+07	5.07514e+07	4.48068e+07	4.46086e+07	5.39801e+07	4.28867e+07	4.16605e+07	3.8959e+07	4.0823e+07	4.16468e+07	4.16638e+07	3.63257e+07
M147T126	147.078	126.5	2.1	2.2015e+06	7.21169e+06	1.97586e+06	1.8311e+06	6.06554e+06	3.13446e+06	6.91866e+06	2.22602e+06	2.64606e+06	2.19453e+06	3.496e+06	2.6376e+06	1.57785e+07	2.60872e+06	1.22124e+07	1.48748e+07	1.77876e+06	1.63253e+07	2.39554e+06	6.8823e+06	1.81798e+06	3.55681e+06	2.38555e+06	4.18574e+06	6.22139e+06	6.57977e+06	6.23077e+06	6.23064e+06	4.80884e+06	7.49219e+06	9.05022e+06
M147T139	147.044	139.5	2.3	1.18575e+06	4.71702e+06	4.22253e+06	840390	8.74805e+06	935434	5.24051e+06	526219	7.90744e+06	1.29504e+07	1.11492e+07	9.41078e+06	7.08587e+06	1.58657e+07	1.67526e+07	1.31188e+07	1.21246e+07	1.03886e+07	1.36585e+07	8.15884e+06	1.13268e+07	8.38427e+06	1.09679e+07	1.16543e+07	1.03681e+07	8.99621e+06	9.90319e+06	9.55674e+06	9.56078e+06	1.05528e+07	9.56229e+06
M147T191	147.044	191	3.2	4.85168e+06	2.76006e+06	5.12702e+06	4.10083e+06	3.99448e+06	3.14171e+06	5.07751e+06	4.81845e+06	5.99593e+06	5.37603e+06	7.38387e+06	4.21698e+06	4.25986e+06	4.88247e+06	5.26886e+06	5.3507e+06	6.57374e+06	7.40988e+06	6.72744e+06	8.7839e+06	6.28112e+06	6.15541e+06	5.36764e+06	6.8479e+06	5.66618e+06	5.66392e+06	5.56206e+06	5.56458e+06	6.19086e+06	5.5136e+06	5.56832e+06
M147T222	147.046	221.7	3.7	3.40743e+06	1.32368e+06	3.12939e+06	2.66719e+06	5.92127e+06	3.16056e+06	4.6605e+06	4.50423e+06	3.42974e+06	4.79061e+06	3.95451e+06	2.85312e+06	3.30576e+06	3.50803e+06	4.0587e+06	4.29619e+06	3.59316e+06	3.27912e+06	4.46753e+06	3.44666e+06	4.0328e+06	3.36938e+06	2.90288e+06	3.47178e+06	3.10335e+06	3.14825e+06	3.59189e+06	3.1469e+06	3.1033e+06	3.1026e+06	3.10257e+06
M147T397	147.063	396.7	6.6	339410	1.34234e+06	350121	472430	213700	282033	725749	300633	1.90948e+06	2.06458e+06	719731	1.86399e+06	149803	3.88258e+06	838564	1.05238e+06	630109	176419	1.07674e+06	1.10988e+06	456174	2.60298e+06	1.36069e+06	3.04979e+06	1.12952e+06	1.04283e+06	1.3342e+06	1.04922e+06	1.12183e+06	694328	1.03649e+06
M147T454	146.507	454	7.6	185946	116830	317490	14570.6	490159	139512	135193	165782	205301	7914.63	2549.45	392043	227323	466900	136506	301562	167882	146423	94887.5	208705	200281	123656	304726	125922	253893	269361	279356	351552	353688	341470	404949
M147T578	147.063	578.2	9.6	722838	626107	1.59987e+06	1.62479e+06	2.46835e+06	2.41866e+06	1.08893e+06	1.71437e+06	2.04032e+06	606219	825777	936554	364263	395697	465937	379800	424409	461886	585481	670724	812439	634549	886798	585172	699818	759256	759324	689986	1.02925e+06	762068	702897
M147T626	147.063	625.7	10.4	1.62216e+06	1.33155e+06	1.73805e+06	2.39212e+06	1.73481e+06	1.69169e+06	1.56428e+06	2.07604e+06	636886	2.26313e+06	2.02463e+06	3.45076e+06	1.12546e+06	2.44912e+06	1.49129e+06	1.49759e+06	2.03406e+06	1.47846e+06	1.46651e+06	1.75215e+06	1.55618e+06	1.79922e+06	1.30808e+06	1.59549e+06	1.57246e+06	1.67657e+06	1.64748e+06	853096	1.67994e+06	1.67294e+06	1.68134e+06
M147T640	147.08	640	10.7	617476	497491	584855	839670	1.10016e+06	819134	520218	980212	895630	996411	975760	1.01436e+06	861264	659428	964587	974160	944996	978803	1.65426e+06	659548	1.01676e+06	742440	1.65196e+06	956278	812296	815047	842979	808706	841915	806940	855253
M147T68	147.169	67.8	1.1	250903	378561	431210	394536	452620	296507	319239	342094	298655	100986	328352	357577	429005	404062	375838	366332	146094	440626	383957	232187	432224	87270.4	355541	106294	323809	181570	312462	312974	288959	310819	240979
M147T72	147.031	71.8	1.2	1.84537e+06	6.82949e+06	1.63923e+06	2.301e+06	540903	956254	1.43648e+06	456085	404099	3.67996e+06	552477	448516	2.53386e+06	1.27905e+06	1.87809e+06	2.31486e+06	553287	480556	4.0734e+06	4.87115e+06	472154	471255	412791	2.14062e+06	1.71515e+06	1.71587e+06	1.68663e+06	1.54923e+06	1.71504e+06	1.68653e+06	1.69161e+06
M147T76_1	147.008	76	1.3	291621	219748	282109	276941	217670	265048	221837	211585	310146	190491	218404	204494	177971	197340	201394	181800	244139	301024	281462	248958	277252	296361	212539	266497	226686	226591	297555	240786	226074	243424	215059
M147T76_2	147.113	76.3	1.3	4.75365e+08	5.80854e+08	4.92512e+08	6.8843e+08	4.85972e+08	5.05819e+08	4.82742e+08	5.13894e+08	8.24992e+08	8.85204e+08	8.50171e+08	1.25887e+09	9.52456e+08	1.02177e+09	9.78312e+08	1.08174e+09	5.11289e+08	8.32376e+08	5.16348e+08	4.90104e+08	4.69787e+08	7.48864e+08	8.55745e+08	7.80983e+08	5.75272e+08	5.47192e+08	5.77955e+08	5.32507e+08	5.73275e+08	8.14257e+08	5.43315e+08
M147T771	147.08	770.7	12.8	769146	886803	1.59149e+06	364755	1.23026e+06	802133	1.01464e+06	1.21176e+06	611476	900488	871258	1.56485e+06	894356	946474	1.03214e+06	820111	532241	372133	785490	946988	671045	1.01609e+06	1.32615e+06	357789	1.04371e+06	1.00447e+06	973054	974196	1.03919e+06	996422	998776
M147T85	147.077	85.3	1.4	1.96305e+09	1.83823e+09	1.88136e+09	1.89359e+09	1.99654e+09	1.9511e+09	1.98555e+09	1.84783e+09	2.12057e+09	2.03242e+09	1.88165e+09	1.82501e+09	1.99061e+09	1.80168e+09	1.80281e+09	2.05241e+09	1.95179e+09	2.14381e+09	2.14681e+09	2.21629e+09	1.9399e+09	1.93984e+09	1.84649e+09	1.86927e+09	1.86105e+09	1.95313e+09	1.94593e+09	1.92839e+09	1.99313e+09	1.94699e+09	1.92849e+09
M147T97	147.121	96.9	1.6	7.0708e+06	5.1529e+06	8.65792e+06	9.89335e+06	1.14292e+07	8.45586e+06	7.94254e+06	6.356e+06	1.40817e+07	1.37618e+07	1.52773e+07	1.44392e+07	1.21841e+07	1.23583e+07	1.30462e+07	1.27589e+07	1.57346e+07	1.69987e+07	1.63227e+07	1.40405e+07	1.50234e+07	1.44553e+07	1.39258e+07	1.59592e+07	1.21254e+07	1.21236e+07	1.21237e+07	1.21257e+07	1.22955e+07	1.21289e+07	1.24758e+07
M148T100	148.06	99.7	1.7	2.70121e+07	1.57755e+07	3.60014e+07	4.27515e+07	3.83656e+07	2.78415e+07	4.05166e+07	2.14577e+07	2.05141e+07	4.11536e+07	4.20076e+07	3.01605e+07	4.17203e+07	5.02206e+07	3.98328e+07	4.35597e+07	1.73728e+07	4.50414e+07	5.24144e+07	2.62431e+07	3.8086e+07	3.78625e+07	3.67348e+07	4.45496e+07	3.2946e+07	3.18244e+07	3.18632e+07	3.18137e+07	3.78225e+07	3.3438e+07	2.5134e+07
M148T114	148.043	113.8	1.9	4.11104e+06	3.02719e+06	1.79721e+06	5.21912e+06	2.04447e+06	3.63806e+06	2.85169e+06	1.65587e+06	3.96949e+06	3.83909e+06	1.80716e+06	1.81399e+06	2.83826e+06	3.10423e+06	2.38218e+06	3.15721e+06	1.74447e+06	2.26077e+06	3.12069e+06	6.38894e+06	2.0491e+06	6.4118e+06	3.65566e+06	2.45835e+06	3.8639e+06	3.47742e+06	4.15369e+06	4.25771e+06	4.37045e+06	4.69371e+06	2.04167e+06
M148T116	148.06	116.3	1.9	3.44894e+07	2.12013e+07	3.10781e+07	6.49047e+06	5.0166e+07	2.79869e+07	4.31189e+07	2.54505e+07	5.49076e+07	9.69465e+06	5.44584e+07	1.12132e+07	1.55051e+07	9.80684e+06	1.11886e+07	1.17898e+07	1.20561e+07	1.49746e+07	1.14079e+07	1.18259e+07	1.13e+07	2.00703e+07	1.08315e+07	1.94946e+07	1.21098e+07	1.21247e+07	1.26358e+07	1.08111e+07	1.64422e+07	1.54084e+07	1.20755e+07
M148T121	148.097	121.1	2	4.96796e+06	4.51622e+06	5.66435e+06	5.34809e+06	4.7277e+06	4.81633e+06	6.02441e+06	5.99661e+06	5.1854e+06	5.07424e+06	4.8754e+06	4.80499e+06	5.22639e+06	5.73358e+06	4.77699e+06	6.0962e+06	5.18675e+06	5.99652e+06	5.54403e+06	4.85545e+06	4.37454e+06	5.14778e+06	5.4659e+06	5.81949e+06	5.6406e+06	5.04991e+06	5.68691e+06	5.49984e+06	5.33944e+06	3.75826e+06	5.71555e+06
M148T125	148.047	125.1	2.1	147640	137021	150566	158116	489567	221395	481814	463111	502887	310536	304671	425207	476734	528392	343737	469685	352086	483587	388661	363271	309001	423372	477239	480175	382313	381696	298060	382395	317012	366843	393658
M148T338	148.076	338.4	5.6	1.71049e+06	1.98162e+06	1.91206e+06	1.84139e+06	1.67839e+06	1.46843e+06	1.98934e+06	1.71962e+06	2.05176e+06	2.36813e+06	2.08308e+06	1.99127e+06	1.99453e+06	1.90976e+06	1.90861e+06	2.1255e+06	1.93165e+06	1.99457e+06	2.08686e+06	1.75778e+06	1.93738e+06	1.8842e+06	1.69158e+06	1.95292e+06	1.84511e+06	1.93174e+06	1.75727e+06	1.84539e+06	1.89921e+06	1.84737e+06	1.87722e+06
M148T72	148.027	71.8	1.2	2.51373e+06	1.94138e+06	2.16189e+06	1.85359e+06	1.70415e+06	1.55951e+06	1.84997e+06	1.8375e+06	2.77101e+06	2.40498e+06	2.75868e+06	2.04871e+06	2.31491e+06	1.97224e+06	2.09574e+06	2.10946e+06	2.65461e+06	2.99119e+06	2.58457e+06	2.66678e+06	2.71642e+06	2.84974e+06	2.74359e+06	2.90528e+06	2.43448e+06	2.41347e+06	2.4134e+06	2.42494e+06	2.43056e+06	2.35474e+06	2.42492e+06
M148T76	148.116	76.3	1.3	2.31281e+07	4.50685e+07	4.83781e+07	2.10186e+07	5.59649e+07	1.60309e+07	1.90279e+07	2.12495e+07	2.81264e+07	4.68708e+07	1.42097e+07	3.7906e+07	3.94315e+07	2.27276e+07	3.77668e+07	2.73412e+07	2.87714e+07	3.11536e+07	2.08594e+07	2.75993e+07	1.64309e+07	2.16521e+07	2.89656e+07	2.20271e+07	3.28635e+07	3.81134e+07	3.81419e+07	3.29047e+07	3.32733e+07	3.47973e+07	3.35769e+07
M148T77	148.084	77.1	1.3	1.80367e+06	1.76404e+06	1.79334e+06	1.75176e+06	1.53532e+06	1.69769e+06	2.19479e+06	1.90725e+06	1.35434e+06	1.32711e+06	1.29237e+06	1.29288e+06	732858	1.43918e+06	1.21308e+06	1.21604e+06	988336	1.1401e+06	1.07139e+06	1.37265e+06	1.03268e+06	1.25669e+06	979593	1.28447e+06	1.41503e+06	1.41784e+06	1.41492e+06	1.42044e+06	1.44247e+06	1.40324e+06	1.43712e+06
M148T84	148.004	84.2	1.4	2.09709e+08	1.58761e+08	1.8439e+08	1.28609e+08	1.42255e+08	1.45809e+08	1.87457e+08	2.10132e+08	4.83069e+07	1.64797e+08	1.65826e+08	1.75057e+08	1.12663e+08	1.56079e+08	1.10648e+08	1.25002e+08	1.45245e+08	1.2481e+08	5.32636e+07	1.18651e+08	1.08538e+08	1.89658e+08	1.72182e+08	1.42535e+08	1.2295e+08	1.19845e+08	1.19924e+08	1.29292e+08	1.22891e+08	9.87339e+07	1.20509e+08
M148T85	148.08	85.3	1.4	4.08494e+06	2.89331e+06	2.78921e+06	4.58171e+06	3.62836e+06	4.57153e+06	4.34712e+06	2.37702e+06	2.25987e+08	2.44663e+08	2.05817e+08	2.05461e+08	1.91852e+08	1.97678e+08	2.26054e+08	2.2407e+08	3.67564e+06	2.38374e+08	5.24158e+06	3.81685e+06	3.95471e+06	2.38013e+08	2.08413e+08	1.82442e+08	1.06451e+08	1.05257e+08	1.03819e+08	1.06412e+08	1.07905e+08	1.1271e+08	1.11467e+08
M148T88	148.06	88.5	1.5	1.26095e+09	1.61946e+09	1.35475e+09	1.42161e+09	1.49615e+09	1.61278e+09	1.76228e+09	1.9533e+09	1.59612e+09	2.44005e+09	1.43181e+09	1.88972e+09	1.04172e+09	8.61865e+08	1.31765e+09	1.21108e+09	1.55479e+09	1.28404e+09	1.33358e+09	1.87299e+09	1.29754e+09	1.02731e+09	2.17462e+09	1.04515e+09	1.14668e+09	1.14268e+09	1.62157e+09	1.18509e+09	1.13767e+09	1.22174e+09	1.22105e+09
M148T99_1	148.097	99.4	1.7	568053	701306	549752	843386	652593	528731	1.42667e+06	574443	2.71334e+06	4.14561e+06	2.75146e+06	3.5771e+06	3.06361e+06	4.85854e+06	4.7859e+06	4.784e+06	719091	2.83348e+06	698840	676733	1.85716e+06	2.88137e+06	2.3945e+06	3.36761e+06	843756	1.99276e+06	2.10841e+06	2.04474e+06	2.11291e+06	1.99988e+06	2.11276e+06
M148T99_2	148.133	98.9	1.6	2.31124e+06	2.97968e+06	2.27494e+06	3.91275e+06	2.05879e+06	2.24423e+06	3.70322e+06	3.50585e+06	3.8762e+06	4.61463e+06	770996	4.96272e+06	3.64153e+06	4.49745e+06	2.61962e+06	3.74339e+06	2.98554e+06	1.59345e+06	3.61704e+06	3.31959e+06	3.2813e+06	4.22425e+06	4.19213e+06	4.3859e+06	2.90921e+06	2.91675e+06	1.1956e+06	2.91036e+06	2.90009e+06	2.70227e+06	1.58564e+06
M149T335	149.071	334.6	5.6	2.09371e+06	1.95428e+06	3.69164e+06	2.7068e+06	293855	439730	946521	607773	116912	2.49695e+06	334114	286543	5.60888e+06	3.24947e+06	1.33177e+06	382671	873011	4.70443e+06	2.03717e+06	1.54072e+06	550762	1.75731e+06	1.11289e+06	1.90338e+06	806729	1.69091e+06	1.9985e+06	1.69051e+06	1.54789e+06	1.68646e+06	1.64902e+06
M149T338	149.06	338.4	5.6	1.34712e+07	3.67979e+07	3.27374e+07	1.25355e+07	3.76421e+07	4.81779e+07	5.8761e+07	4.49385e+07	3.09237e+07	3.15468e+07	2.24871e+07	2.15615e+07	5.47879e+07	7.87845e+06	1.34812e+07	1.55506e+07	2.42756e+07	5.16207e+07	2.83042e+07	2.14962e+07	1.02004e+07	1.01002e+07	2.03026e+07	1.88583e+07	3.36847e+07	2.99695e+07	3.53748e+07	1.44768e+07	3.02279e+07	3.00531e+07	3.219e+07
M149T356	149.03	356.4	5.9	3.05168e+06	825751	3.04522e+06	3.85007e+06	3.05532e+06	2.44027e+06	319008	420967	3.73204e+06	4.34149e+06	1.43265e+06	1.0624e+06	4.19421e+06	3.39218e+06	323592	305482	194271	3.42962e+06	602553	550521	56158.6	3.21926e+06	115621	429532	1.77873e+06	1.93913e+06	1.93693e+06	1.07607e+06	2.31267e+06	2.29467e+06	1.77656e+06
M149T565	149.045	565.4	9.4	4.76931e+06	2.18029e+06	657748	2.81041e+06	1.18131e+06	446052	2.88819e+06	555942	733726	462068	900115	1.40198e+06	3.36778e+06	775432	489038	468312	4.97742e+06	2.09397e+06	3.55395e+06	596874	1.68683e+06	917443	1.12355e+06	1.54795e+06	1.21189e+06	1.22022e+06	1.21775e+06	1.5645e+06	1.5756e+06	1.28585e+06	1.21989e+06
M149T65	148.977	64.5	1.1	4.78782e+06	2.64414e+06	4.3262e+06	3.24831e+06	4.0775e+06	2.99258e+06	5.10221e+06	5.57411e+06	1.12006e+07	9.54376e+06	2.43093e+06	6.7852e+06	1.74145e+06	6.13153e+06	1.39544e+06	8.33283e+06	4.27426e+06	2.1533e+06	2.13404e+06	3.71615e+06	4.16708e+06	5.42874e+06	477143	601343	5.8147e+06	5.52535e+06	4.68715e+06	5.61054e+06	4.08987e+06	4.37929e+06	4.12856e+06
M149T657	149.06	657.1	11	282948	404747	363502	810913	1.00202e+06	1.31247e+06	391159	401965	979667	342607	1.46307e+06	820147	923280	1.12972e+06	529117	1.09736e+06	978037	848435	413978	851092	1.13618e+06	428902	466287	834410	1.04358e+06	1.04311e+06	425741	1.03678e+06	1.04248e+06	1.00105e+06	1.04272e+06
M149T76	149.117	76.1	1.3	2.46527e+06	2.45519e+06	2.49246e+06	2.68207e+06	2.47537e+06	2.75775e+06	2.59178e+06	2.65988e+06	2.18121e+06	2.49397e+06	2.58143e+06	2.72554e+06	2.44492e+06	2.39675e+06	2.53542e+06	2.3679e+06	2.82183e+06	3.43102e+06	3.56813e+06	2.41701e+06	2.60908e+06	2.19987e+06	2.59296e+06	2.17778e+06	2.34007e+06	2.29993e+06	2.41191e+06	2.6585e+06	2.56797e+06	2.28169e+06	2.40617e+06
M149T785	149.023	784.8	13.1	1.10904e+06	826617	3.77869e+06	2.34273e+06	655995	1.77585e+06	6.33872e+06	7.02824e+06	1.77925e+06	2.31688e+06	2.72402e+06	1.95736e+06	2.55901e+06	6.07394e+06	759070	199616	934207	1.70408e+06	1.46227e+06	4.51338e+06	1.03294e+06	2.68336e+06	2.53902e+06	2.39546e+06	5.13741e+06	6.25293e+06	6.08313e+06	5.64604e+06	6.36889e+06	6.15365e+06	5.65785e+06
M149T823	149.06	823.1	13.7	3.31356e+06	4.51216e+06	5.04514e+06	7.02721e+06	5.73212e+06	4.69483e+06	2.369e+06	1.70393e+06	2.80262e+06	4.24835e+06	6.69254e+06	4.91466e+06	5.5583e+06	2.05266e+06	4.76063e+06	5.08342e+06	4.48977e+06	9.13e+06	3.60565e+06	2.18661e+06	6.35841e+06	2.85658e+06	1.02667e+07	3.39697e+06	3.74417e+06	4.21492e+06	3.69055e+06	3.68966e+06	4.24321e+06	3.53998e+06	4.06439e+06
M149T85	149.081	85.3	1.4	86287.6	8.06429e+06	1.07111e+07	39864	170800	2.09824e+06	1.26483e+07	1.06371e+07	98925.5	42809	1.117e+07	7.48013e+06	1.46615e+07	8.2881e+06	7.98596e+06	7.27023e+06	8.36071e+06	1.04061e+07	59956.8	1.0151e+07	7.04383e+06	43760.9	7.22306e+06	9.92761e+06	1.10716e+07	1.13343e+07	1.06117e+07	1.1067e+07	1.23343e+07	1.1328e+07	1.13179e+07
M149T88	149.064	88.5	1.5	7.01583e+07	6.28548e+07	6.64528e+07	8.55403e+07	6.07216e+07	7.02992e+07	6.65792e+07	6.6405e+07	5.67534e+07	5.9057e+07	6.23583e+07	7.30858e+07	6.63038e+07	6.32154e+07	7.20052e+07	5.56311e+07	4.02536e+07	6.87402e+07	4.53087e+07	7.05235e+07	8.2506e+07	7.55363e+07	3.3032e+07	5.38092e+07	8.01035e+07	6.6111e+07	6.83863e+07	6.44051e+07	6.60081e+07	6.86345e+07	6.61261e+07
M150T107	149.664	107.3	1.8	896204	774803	879224	935559	1.27028e+06	702592	1.08966e+06	1.14896e+06	292117	327715	311015	310636	280244	300526	291686	281848	835965	277531	895213	656962	906505	320266	323863	311706	382995	373901	378031	485348	401730	384675	401888
M150T122	150.058	121.7	2	1.39392e+08	3.77972e+07	2.19444e+08	5.36759e+07	1.65424e+08	1.56601e+08	3.41645e+08	2.61645e+08	1.31932e+09	1.26079e+09	1.48709e+09	1.09191e+09	1.46057e+09	1.48222e+09	1.10215e+09	9.54124e+08	5.18016e+08	7.5273e+08	6.38356e+08	2.95921e+08	3.50252e+08	7.59322e+08	1.10261e+09	1.35335e+08	6.31209e+08	6.53019e+08	7.67981e+08	6.37406e+08	6.7134e+08	6.53198e+08	6.64902e+08
M150T140	150.058	139.9	2.3	7.96294e+06	3.12206e+07	4.50939e+07	3.98435e+07	5.02139e+06	6.27838e+06	3.90437e+07	3.83024e+07	3.0691e+07	5.27605e+06	7.03624e+07	5.54527e+07	4.41832e+07	5.57486e+07	5.61459e+07	5.24307e+07	5.27071e+07	4.96335e+07	3.00332e+06	7.96034e+06	4.0224e+07	3.47103e+06	7.77233e+06	5.66697e+07	5.81307e+07	4.51786e+07	5.80689e+07	5.71194e+07	6.70552e+07	5.57379e+07	5.57147e+07
M150T288	150.055	288	4.8	1.28952e+06	847114	1.83202e+06	867943	1.85778e+06	270910	1.58405e+06	1.93745e+06	293367	192646	752060	778738	849506	1.24831e+06	1.06949e+06	1.10569e+06	2.13319e+06	2.31577e+06	3.00559e+06	1.52739e+06	1.32201e+06	1.16979e+06	841055	289409	573894	631633	491344	499737	514933	474143	744082
M150T308	150.055	308.1	5.1	1.65199e+06	582728	1.63777e+06	1.08568e+06	1.27404e+06	1.88158e+06	1.64471e+06	1.921e+06	568196	1.66366e+06	1.40773e+06	1.89078e+06	861886	398150	1.50438e+06	1.90498e+06	1.558e+06	640109	570862	1.77578e+06	1.48789e+06	1.32959e+06	2.03081e+06	1.44668e+06	1.16169e+06	1.14732e+06	854593	1.15551e+06	1.15578e+06	919674	1.14493e+06
M150T338	150.063	338.4	5.6	1.02722e+06	2.5078e+06	1.52596e+06	771823	1.72783e+06	4.26864e+06	1.73881e+06	2.3626e+06	3.14373e+06	2.63638e+06	2.69326e+06	1.8166e+06	9.76431e+06	2.81873e+06	3.04153e+06	2.86188e+06	2.26706e+06	9.07222e+06	2.80206e+06	1.36204e+06	3.77673e+06	4.0283e+06	5.27533e+06	7.76296e+06	2.62298e+06	3.46487e+06	2.95083e+06	2.96277e+06	3.41592e+06	3.09932e+06	2.96485e+06
M150T34	149.966	34.2	0.6	1.6464e+07	1.56591e+07	1.66216e+07	1.74017e+07	1.11928e+07	2.00427e+07	6.83358e+06	1.76476e+07	7.08254e+06	1.75944e+07	1.99005e+07	2.2612e+07	2.74309e+07	8.49263e+06	1.59909e+07	1.12044e+07	1.2434e+07	1.75343e+07	1.23989e+07	2.37036e+07	1.79433e+07	1.20146e+07	1.8409e+07	1.50329e+07	1.30103e+07	1.23575e+07	1.28843e+07	1.24535e+07	1.39823e+07	1.40691e+07	1.40664e+07
M150T356	150.049	356.4	5.9	9.32296e+06	9.98909e+06	1.05307e+07	9.11931e+06	1.15377e+07	9.85467e+06	8.53226e+06	9.84004e+06	7.64329e+06	7.21791e+06	9.44822e+06	9.62323e+06	8.02722e+06	9.27624e+06	9.97252e+06	9.76392e+06	1.06593e+07	1.3429e+07	1.14456e+07	1.12639e+07	9.93137e+06	8.52106e+06	1.1131e+07	8.34256e+06	9.04237e+06	9.09389e+06	9.22083e+06	9.21754e+06	9.05144e+06	9.0482e+06	1.02346e+07
M150T404	149.967	403.6	6.7	1.52105e+06	6.53298e+06	5.42363e+06	503733	7.83462e+06	4.7347e+06	7.34802e+06	1.02314e+06	5.72427e+06	7.80422e+06	3.27161e+06	782755	3.45477e+06	1.32197e+07	6.89982e+06	4.65701e+06	4.54637e+06	8.25878e+06	7.90895e+06	8.61919e+06	2.36728e+06	6.98959e+06	2.32656e+06	9.73606e+06	4.41509e+06	3.67178e+06	3.67404e+06	3.13953e+06	4.20739e+06	3.49012e+06	6.1664e+06
M150T418	150.057	417.8	7	2.47796e+06	2.36371e+06	1.33552e+06	1.43741e+06	2.5393e+06	2.58767e+06	3.61004e+06	2.42672e+06	1.48837e+06	2.38393e+06	2.44688e+06	2.79876e+06	794408	2.24765e+06	1.21082e+06	2.70623e+06	1.05181e+06	545773	1.32801e+06	2.96948e+06	2.07117e+06	1.51154e+06	1.03224e+06	1.71141e+06	1.7254e+06	1.2615e+06	1.26875e+06	1.37072e+06	2.0546e+06	1.26022e+06	1.26465e+06
M150T490	150.128	490.2	8.2	1.06669e+06	867839	1.05209e+06	1.097e+06	518626	398870	972618	941431	486520	1.18787e+06	796892	670837	1.3566e+06	1.30464e+06	1.24583e+06	290385	1.33622e+06	878025	1.16252e+06	487937	1.34193e+06	918630	1.06669e+06	2.13386e+06	927341	979612	955407	922485	978534	360489	976581
M150T556	150.091	556.2	9.3	534045	426816	235240	763991	283471	563557	918519	439095	760995	549932	1.27329e+06	691496	472689	487277	268588	861240	847055	247269	781927	749694	709147	904852	614639	647932	441580	401855	443911	406285	601695	401188	398185
M150T601	150.128	600.6	10	905664	458564	722340	692360	610531	501745	673904	894273	992421	834992	1.23761e+06	1.11423e+06	814438	787733	783983	836446	248656	73926.8	525501	871138	240675	1.06096e+06	709558	718452	561469	518153	567239	517548	522764	521914	648790
M150T686	150.092	686.4	11.4	509473	54692.7	153033	239147	138478	383127	242374	227364	392101	303997	314839	538229	283001	275394	438332	341451	298008	933298	498379	422788	854696	429219	812860	507952	348242	217240	319254	350784	322329	447996	347571
M150T72_1	149.597	72.4	1.2	2.0555e+06	4.61391e+06	7.65192e+06	7.36146e+06	6.44453e+06	2.37117e+06	3.14457e+06	8.73077e+06	1.44647e+07	8.30116e+06	8.15708e+06	8.70604e+06	1.39373e+07	9.78173e+06	1.89448e+06	8.78667e+06	5.26635e+06	1.05137e+07	9.13177e+06	8.39129e+06	6.98903e+06	5.96402e+06	1.17097e+07	6.66468e+06	6.70246e+06	4.2084e+06	6.34526e+06	6.34751e+06	6.3664e+06	6.37822e+06	7.38604e+06
M150T73	149.953	72.9	1.2	6.47544e+06	501881	1.23764e+07	3.64091e+06	3.2117e+06	1.29319e+07	2.99246e+06	5.7046e+06	4.2811e+06	3.47237e+06	4.0285e+06	603973	1.28697e+07	1.27782e+06	4.16883e+06	781106	3.19684e+06	4.05639e+06	2.37144e+07	2.59073e+06	7.64416e+06	1.60627e+07	5.07264e+06	1.32006e+07	1.24804e+07	6.53691e+06	6.56892e+06	8.66736e+06	6.28496e+06	6.41834e+06	8.88467e+06
M150T738	150.091	738.5	12.3	94242.8	683329	697077	71362.4	396668	394667	265221	101612	434970	545403	135049	306496	180152	370711	48906	145829	88645.3	350236	518441	182710	131650	161201	38956.3	507364	260359	415013	397193	230005	271630	281006	492982
M150T84_1	150	83.8	1.4	3.34719e+06	2.50684e+06	5.0633e+06	1.32986e+06	6.57262e+06	3.3893e+06	6.02703e+06	4.3728e+06	4.60296e+06	3.54476e+06	7.32531e+06	4.38027e+06	8.61775e+06	3.82579e+06	3.44927e+06	3.17935e+06	6.23547e+06	1.13609e+07	1.10393e+07	7.03308e+06	4.85708e+06	5.32968e+06	4.48519e+06	5.26267e+06	4.89293e+06	4.93563e+06	4.89017e+06	4.47436e+06	5.16407e+06	5.01278e+06	5.00776e+06
M150T84_2	150.076	83.6	1.4	2.0598e+06	6.41398e+06	6.37702e+06	2.371e+06	6.01921e+06	6.79547e+06	5.88486e+06	7.12861e+06	5.98773e+06	5.77377e+06	5.62304e+06	5.65661e+06	5.7136e+06	5.77226e+06	5.69637e+06	5.45174e+06	6.26122e+06	6.16295e+06	5.74547e+06	5.90312e+06	6.33952e+06	6.25209e+06	7.18247e+06	6.36292e+06	5.55924e+06	6.07209e+06	6.40791e+06	6.19413e+06	6.10958e+06	6.27255e+06	6.4981e+06
M150T88	150.065	88.5	1.5	1.27637e+07	8.66029e+06	1.00524e+07	9.52761e+06	1.18722e+07	8.95952e+06	1.02783e+07	1.42153e+07	5.3981e+06	1.11999e+07	1.03568e+07	1.20785e+07	1.05575e+07	5.86352e+06	1.45133e+07	1.05611e+07	7.15436e+06	1.21581e+07	9.90269e+06	6.38895e+06	6.44175e+06	8.37866e+06	1.06977e+07	8.70858e+06	8.6635e+06	9.38751e+06	9.51225e+06	9.85254e+06	9.19732e+06	9.19277e+06	9.19827e+06
M151T122	151.061	121.7	2	5.95634e+07	6.99906e+07	6.28507e+07	7.93591e+07	7.14704e+07	6.77287e+07	5.74325e+07	6.26876e+07	2.77262e+07	2.56884e+07	4.19232e+07	3.93591e+07	2.12224e+07	3.24658e+07	2.00886e+07	1.71898e+07	6.54636e+07	1.64552e+07	6.5224e+07	5.70062e+07	6.47715e+07	2.96355e+07	3.07019e+07	2.49909e+07	3.99551e+07	4.09108e+07	3.97247e+07	3.97524e+07	5.06634e+07	3.97653e+07	4.09157e+07
M151T140	151.061	140	2.3	2.61981e+06	3.64792e+06	3.99639e+06	3.68243e+06	2.65993e+06	2.59883e+06	3.77271e+06	3.92546e+06	1.48423e+07	1.66627e+07	1.28828e+07	1.51574e+07	1.61666e+07	1.26978e+07	2.13484e+07	2.10515e+07	6.52166e+06	1.84573e+07	6.27961e+06	4.90013e+06	6.86423e+06	1.47352e+07	1.49578e+07	1.55317e+07	9.12813e+06	9.13923e+06	1.02521e+07	9.38583e+06	8.84281e+06	9.21255e+06	9.27854e+06
M151T266	151.097	266	4.4	3.69731e+06	1.043e+07	6.3651e+06	4.12895e+06	3.91192e+06	3.63901e+06	6.27374e+06	7.38379e+06	4.78817e+06	3.84465e+06	6.91282e+06	6.49784e+06	7.65721e+06	6.47719e+06	6.73733e+06	6.83806e+06	7.06033e+06	7.29398e+06	2.9219e+06	5.15955e+06	4.02656e+06	2.78344e+06	5.73749e+06	7.29765e+06	7.08352e+06	7.32768e+06	7.17062e+06	7.31637e+06	6.40567e+06	7.33889e+06	6.87142e+06
M151T302	151.097	302.3	5	3.9385e+06	1.32807e+06	1.93497e+06	4.07525e+06	1.34398e+06	902001	1.0787e+06	652382	3.73778e+06	5.67377e+06	5.36704e+06	3.32748e+06	7.33348e+06	4.76694e+06	1.25093e+07	4.86882e+06	1.61513e+06	5.70635e+06	1.36453e+06	4.3705e+06	7.06892e+06	6.63965e+06	4.96538e+06	4.22261e+06	4.50369e+06	3.24443e+06	3.56085e+06	4.74295e+06	5.27498e+06	4.11889e+06	4.40219e+06
M151T330	151.062	329.7	5.5	1.53391e+06	4.97047e+06	4.5822e+06	1.87444e+06	5.34706e+06	4.23264e+06	7.80871e+06	7.06074e+06	4.51155e+06	5.46524e+06	4.31521e+06	4.3853e+06	1.05547e+07	5.09624e+06	3.50221e+06	3.21771e+06	3.70687e+06	1.08078e+07	4.0812e+06	2.41739e+06	4.61732e+06	4.40196e+06	3.33856e+06	9.70202e+06	4.35853e+06	4.86662e+06	4.97309e+06	4.39544e+06	4.8088e+06	4.9552e+06	5.18923e+06
M151T353	151.097	352.6	5.9	1.00552e+06	955149	881399	931088	775980	559265	878251	1.19912e+06	1.00315e+06	1.08178e+06	996880	970694	1.1254e+06	1.33013e+06	1.31859e+06	1.278e+06	1.3499e+06	1.11085e+06	1.34558e+06	993938	1.31931e+06	1.0721e+06	854887	955023	1.02098e+06	1.0509e+06	1.02151e+06	1.09067e+06	1.04976e+06	1.02189e+06	1.04952e+06
M151T356	150.551	356.4	5.9	1.64473e+06	5.92988e+06	748925	983227	246250	374970	1.23687e+06	476828	111412	2.56126e+06	101559	232816	894871	921427	838787	852973	356819	20199.5	2.77274e+06	3.82792e+06	462222	234410	14595.3	1.60534e+06	990313	988734	1.10958e+06	876574	1.05269e+06	1.02036e+06	967085
M151T394	151.097	393.7	6.6	204812	686388	947448	949369	878227	226994	718664	693538	725958	1.35224e+06	667227	1.36359e+06	214635	1.22468e+06	1.00251e+06	833837	314463	1.59198e+06	1.15965e+06	1.40313e+06	669236	1.01647e+06	847452	1.07509e+06	393598	716093	306336	700430	693712	694778	645038
M151T596	151.097	596.2	9.9	541297	315891	447373	383907	577806	716674	428079	457424	274866	740715	553864	887796	500671	380588	552770	418067	391918	464527	531325	543597	533615	360312	184456	363194	435849	501025	500425	499458	499890	483614	443197
M151T672	151.036	671.8	11.2	2.16386e+06	1.49435e+06	3.12395e+06	2.68623e+06	3.83087e+06	4.81944e+06	1.21724e+06	2.2558e+06	3.24242e+06	3.09256e+06	4.5702e+06	3.50875e+06	2.1961e+06	2.99285e+06	1.56574e+06	2.33426e+06	3.96133e+06	2.2097e+06	2.55496e+06	3.36481e+06	2.77597e+06	2.81781e+06	2.27098e+06	2.09133e+06	2.2614e+06	2.38243e+06	1.76062e+06	2.1589e+06	2.49221e+06	1.69806e+06	2.14663e+06
M151T72_1	150.501	71.6	1.2	2.8735e+06	1.60814e+06	3.24765e+06	1.49651e+06	2.53178e+06	1.64154e+06	3.83208e+06	1.79016e+06	1.78166e+06	1.84808e+06	1.92684e+06	499493	437878	2.50781e+06	520416	515589	494090	1.14911e+06	3.11131e+06	2.5133e+06	2.94833e+06	517842	2.75404e+06	3.13959e+06	1.49061e+06	1.59998e+06	1.52986e+06	1.60694e+06	1.66586e+06	1.64272e+06	1.6904e+06
M151T72_2	151.035	71.7	1.2	8.62806e+08	1.10116e+09	5.85651e+08	4.67599e+08	7.91229e+08	9.12694e+08	4.83482e+08	5.42607e+08	5.60602e+08	6.00251e+08	6.89828e+08	5.19876e+08	6.07464e+08	4.95603e+08	4.0539e+08	6.38436e+08	6.91787e+08	6.38891e+08	3.79027e+08	5.46817e+08	6.99016e+08	5.79917e+08	3.26943e+08	8.32357e+08	5.72729e+08	5.71581e+08	4.71725e+08	5.72002e+08	5.70051e+08	5.30569e+08	5.01627e+08
M152T112	152.082	112.1	1.9	441569	711384	345682	912646	748459	255036	617612	409628	417951	762604	443415	918373	3.60717e+06	579398	711243	675764	1.26035e+06	1.90951e+06	1.87837e+06	550450	722554	771254	616974	763389	437849	583599	562887	566578	582991	582971	599568
M152T114	152.038	113.9	1.9	1.0687e+07	9.94845e+06	1.25488e+07	1.11046e+07	1.33761e+07	1.03227e+07	8.6418e+06	8.13333e+06	8.46752e+06	7.02649e+06	9.95904e+06	1.11114e+07	1.08104e+07	8.14347e+06	9.79919e+06	8.43169e+06	1.31901e+07	1.67853e+07	1.90104e+07	1.17071e+07	9.70711e+06	7.73054e+06	1.13291e+07	6.85924e+06	9.55134e+06	9.54763e+06	9.55145e+06	9.35778e+06	9.39685e+06	8.84777e+06	9.36947e+06
M152T140	152.057	139.7	2.3	6.50261e+07	9.19298e+07	7.76416e+07	9.65631e+07	5.02251e+07	2.9216e+07	6.97712e+07	7.23194e+07	4.31899e+07	4.1345e+07	5.3467e+07	5.20011e+07	7.74848e+07	5.60749e+07	5.06348e+07	5.65834e+07	7.51959e+07	6.70899e+07	1.28393e+08	4.45178e+07	4.76492e+07	7.2049e+07	6.90849e+07	8.27525e+07	2.99196e+07	2.97748e+07	2.97354e+07	3.64922e+07	2.98064e+07	3.07405e+07	3.05573e+07
M152T174	152.057	174.1	2.9	5.93944e+07	9.42946e+07	7.03389e+07	1.10227e+08	3.53062e+07	3.26813e+07	8.75324e+07	9.98084e+07	6.77983e+07	3.595e+07	7.55533e+07	9.14773e+07	5.94435e+07	6.31271e+07	5.98833e+07	5.73166e+07	6.0358e+07	8.93072e+07	3.97003e+07	5.31e+07	2.29545e+07	3.40597e+07	6.55579e+07	7.77241e+07	6.92851e+07	6.70428e+07	6.95999e+07	6.58184e+07	8.1622e+07	6.52932e+07	6.54017e+07
M152T279	152.057	279.1	4.7	4.04155e+07	3.84703e+07	4.69788e+07	2.19217e+07	6.6839e+07	4.69623e+07	4.19819e+07	3.12266e+07	2.98909e+07	2.21778e+07	4.90778e+07	4.06281e+07	4.89796e+07	1.83956e+07	2.93576e+07	2.71937e+07	5.62781e+07	6.87673e+07	5.84495e+07	4.65575e+07	3.89444e+07	4.16711e+07	4.47548e+07	4.24645e+07	4.03917e+07	3.65707e+07	4.0418e+07	3.96948e+07	4.03903e+07	3.96996e+07	4.22196e+07
M152T302	152.1	302.3	5	1.88032e+06	209055	225200	2.54099e+06	1.37619e+06	1.21435e+06	249467	232687	1.71049e+06	951254	243325	288849	236488	236373	213475	257482	227034	225578	1.48261e+06	193856	221582	1.22255e+06	254200	226590	515822	502418	510083	534508	502564	502552	515092
M152T303	152.057	302.5	5	240924	253095	290841	338080	972417	210513	373715	408694	806856	345010	677521	1.3297e+06	336272	1.20995e+06	1.27096e+06	1.1699e+06	1.16126e+06	302490	1.09518e+06	382049	339541	306201	902317	1.07759e+06	662586	417623	864466	451836	745518	793090	675832
M152T329	152.057	329.1	5.5	1.07464e+06	933057	2.02502e+06	881007	1.41668e+06	1.69176e+06	3.08978e+06	1.73376e+06	245937	461112	875711	815638	449432	322161	646349	430888	1.35809e+06	783983	1.24613e+06	1.53455e+06	1.44163e+06	389685	561351	477912	739261	742118	814358	714808	715748	694834	715333
M152T387	152.071	386.7	6.4	878135	765866	941607	911612	994153	1.46035e+06	621549	560034	1.09602e+06	649459	928558	623629	739691	631259	575896	510080	738960	665473	636216	519077	696423	1.05568e+06	419174	747491	1.43075e+06	1.22991e+06	1.34674e+06	1.22897e+06	1.26081e+06	1.20291e+06	1.20941e+06
M152T398	152.107	397.6	6.6	3.54298e+06	3.22295e+06	2.71199e+06	2.18289e+06	5.02776e+06	2.02061e+06	3.98913e+06	3.9082e+06	6.87331e+06	6.70251e+06	1.15789e+07	2.20458e+07	7.91171e+06	1.21829e+07	9.69118e+06	1.42803e+07	1.38337e+07	2.42701e+06	6.26288e+06	8.3119e+06	5.7227e+06	5.81481e+06	3.59633e+06	4.09591e+06	6.42176e+06	6.52096e+06	6.91335e+06	7.51499e+06	6.95696e+06	6.5359e+06	6.94231e+06
M152T417	152.034	416.6	6.9	24822	136554	17382.8	17735.6	5749.93	4415.38	14730	9662.67	117712	797257	80218.9	455401	942498	475160	490402	993207	55407.3	100032	460186	363420	31036.6	38096.2	20771.2	306203	215003	212148	213419	191228	310806	118189	197047
M152T462	152.143	462	7.7	364333	374708	321594	293576	82772.5	608754	422983	293137	144751	116280	607040	394220	167956	636979	343019	474679	283050	132027	721351	276459	549664	103409	525518	277997	251041	227710	224772	307256	210307	191487	294706
M152T485	152.107	485	8.1	626004	1.76136e+06	6.12549e+06	2.58306e+06	5.70067e+06	945217	1.86324e+06	2.7554e+06	4.77955e+06	4.78821e+06	2.64513e+06	2.89808e+06	2.73393e+06	1.05462e+06	5.17593e+06	2.40595e+06	1.00886e+06	568567	1.52448e+06	760545	897668	5.34106e+06	5.61903e+06	2.61207e+06	270851	379108	375064	416420	415344	415375	442650
M152T525	152.071	525.4	8.8	3.33065e+06	5.77597e+06	1.60417e+06	7.19571e+06	2.77562e+06	1.17362e+06	1.72268e+06	1.54932e+06	1.37707e+06	1.0785e+06	1.8512e+06	1.11217e+06	2.25956e+06	1.18077e+06	960040	1.26672e+06	4.37005e+06	2.51443e+06	5.10457e+06	1.7337e+06	3.7213e+06	944709	3.51468e+06	3.00448e+06	1.44626e+06	1.94458e+06	2.05371e+06	2.19124e+06	1.81968e+06	1.93547e+06	2.29997e+06
M152T620	152.017	620.1	10.3	5.21735e+06	904065	790052	7.28592e+06	543166	682392	1.97493e+06	3.81119e+06	1.45375e+06	7.20187e+06	1.78233e+06	199876	1.96553e+06	8.68329e+06	7.40196e+06	5.49915e+06	1.2855e+07	1.50704e+07	8.6543e+06	6.40752e+06	1.20615e+07	4.51965e+06	4.51763e+06	1.67349e+07	3.60205e+06	4.81139e+06	4.82214e+06	4.5257e+06	4.7857e+06	4.82342e+06	3.17074e+06
M152T70	152.123	69.8	1.2	616651	541105	905436	158840	181719	1.0044e+06	800882	158239	1.52733e+06	835874	1.21963e+06	139803	164449	552356	617772	195568	151683	539852	617456	668274	750328	901162	619639	899913	275594	658814	658257	658691	656281	619492	658253
M152T72	152.036	71.7	1.2	7.64515e+07	1.50008e+08	5.74901e+07	9.89744e+07	9.37213e+07	8.50404e+07	4.88165e+07	6.42442e+07	4.21399e+07	9.7457e+07	4.94197e+07	7.84767e+07	3.34437e+07	1.23232e+08	7.50529e+07	7.2187e+07	1.05486e+08	6.98228e+07	1.10599e+08	7.36602e+07	1.32461e+08	7.58555e+07	5.6306e+07	1.56532e+08	6.26933e+07	6.05379e+07	6.05669e+07	6.0624e+07	6.29911e+07	8.48928e+07	6.30541e+07
M152T73	151.95	73.1	1.2	4.10366e+06	6.92755e+06	6.60941e+06	1.94395e+06	6.58366e+06	6.63632e+06	6.60426e+06	6.88562e+06	5.3976e+06	3.70592e+06	4.70925e+06	5.9575e+06	7.19588e+06	6.1542e+06	6.86083e+06	5.85979e+06	6.99322e+06	7.51291e+06	5.99688e+06	6.92067e+06	6.94216e+06	6.26091e+06	5.88377e+06	6.72051e+06	4.64929e+06	6.17753e+06	6.41388e+06	6.41646e+06	6.40374e+06	5.851e+06	6.72476e+06
M152T78	152.068	77.9	1.3	559747	986081	903609	432878	853076	734281	743365	793006	927316	854416	968856	807280	714596	955233	722691	730323	916996	733691	1.02772e+06	1.11186e+06	672523	769993	686482	913785	859774	919741	830463	867130	1.04491e+06	1.00692e+06	728712
M153T109	153.102	108.6	1.8	1.54827e+06	3.61551e+06	2.23538e+06	1.96528e+06	1.97998e+06	2.47901e+06	661277	2.58259e+06	2.0844e+06	2.25647e+06	1.99214e+06	1.88982e+06	1.16701e+06	2.21402e+06	1.79825e+06	1.97051e+06	2.5501e+06	1.40143e+06	3.16477e+06	565923	2.64132e+06	2.13196e+06	2.03054e+06	2.22761e+06	2.09461e+06	1.79085e+06	2.04651e+06	2.04469e+06	2.29013e+06	2.017e+06	2.10575e+06
M153T122	153.041	121.9	2	1.32115e+08	1.10705e+08	1.15511e+08	1.21272e+08	1.0291e+08	8.06244e+07	2.39101e+08	9.83841e+07	4.30886e+08	9.49975e+08	5.74037e+08	7.05063e+08	7.10624e+08	7.41007e+08	1.0541e+09	1.13154e+09	3.53387e+08	8.4171e+08	1.2751e+08	2.65528e+08	3.71441e+08	4.52353e+08	4.87528e+08	6.06056e+08	4.14543e+08	4.07347e+08	3.30421e+08	4.33443e+08	4.29329e+08	4.07968e+08	4.1891e+08
M153T160	153.041	160.3	2.7	1.76602e+08	4.80961e+08	4.46551e+08	5.57322e+08	3.82537e+08	5.17649e+08	1.70763e+08	4.90085e+08	4.69533e+08	4.9881e+08	4.05852e+08	5.41226e+08	1.95539e+08	2.06919e+08	5.76274e+08	6.8447e+08	6.48639e+08	4.60998e+08	4.83033e+08	4.49726e+08	6.42958e+08	7.04576e+08	4.77356e+08	4.50063e+08	3.76282e+08	3.75691e+08	4.74595e+08	4.78317e+08	4.6855e+08	4.70173e+08	3.929e+08
M153T197	153.066	196.8	3.3	1.1895e+07	1.28499e+07	1.28209e+07	1.34425e+07	1.4292e+07	1.39363e+07	1.44831e+07	1.48932e+07	3.72739e+06	1.29076e+07	1.51764e+07	1.42884e+07	1.1866e+07	1.41165e+07	1.52325e+07	1.15889e+07	1.27388e+07	1.52594e+07	1.36624e+07	1.33639e+07	1.2628e+07	1.19999e+07	1.35527e+07	1.29657e+07	1.37056e+07	1.11563e+07	1.24935e+07	1.18945e+07	1.24237e+07	1.34272e+07	1.3375e+07
M153T256	153.066	256.1	4.3	9.181e+06	1.00637e+07	9.5978e+06	8.49928e+06	1.12725e+07	9.60167e+06	7.00815e+06	9.88806e+06	7.95418e+06	8.22464e+06	1.02337e+07	1.03211e+07	9.74441e+06	8.53542e+06	1.0358e+07	7.97066e+06	1.03056e+07	9.76745e+06	9.37552e+06	1.09401e+07	1.15454e+07	9.87309e+06	8.7302e+06	8.28823e+06	8.07945e+06	8.51231e+06	8.36154e+06	8.51243e+06	8.69927e+06	8.36258e+06	8.36558e+06
M153T278	153.06	278.2	4.6	854414	2.24035e+06	1.42633e+06	1.25301e+06	2.74484e+06	1.52494e+06	3.36395e+06	1.5253e+06	3.14867e+06	2.07495e+06	1.44337e+06	3.25057e+06	3.63777e+06	2.12077e+06	1.29784e+06	1.80191e+06	1.92057e+06	3.26418e+06	4.17236e+06	1.26088e+06	1.423e+06	2.11138e+06	2.95394e+06	5.89271e+06	2.32851e+06	2.28862e+06	2.39916e+06	2.32929e+06	2.28834e+06	2.1196e+06	2.40683e+06
M153T318	153.041	318.1	5.3	4.93982e+06	7.53102e+06	9.07308e+06	1.04305e+07	7.48403e+06	9.46958e+06	9.16465e+06	9.09695e+06	3.31819e+07	5.40575e+07	2.95014e+07	3.35664e+07	3.62974e+07	3.55005e+07	3.36422e+07	4.23666e+07	1.07467e+07	3.21581e+07	1.63124e+07	1.61533e+07	1.50035e+07	1.23693e+07	2.72989e+07	3.45564e+07	1.85623e+07	1.98027e+07	1.97961e+07	1.97922e+07	1.93547e+07	1.88942e+07	2.35085e+07
M153T403	153.102	403	6.7	510845	315784	375237	393700	573070	437141	687427	466671	564917	429995	469802	427559	636897	533036	551969	471285	568980	717656	708795	551519	417378	601015	539877	403264	468226	478620	468353	468653	468738	478248	520549
M153T620	153.02	620.2	10.3	154149	225055	169314	236540	139089	198392	200683	298531	243122	279496	365402	292862	251515	310031	194621	280618	202439	184869	171312	425282	383100	263655	325463	344645	308113	301552	301559	283745	306255	295491	310520
M153T629	153.091	628.6	10.5	4.94352e+06	2.42491e+06	2.7782e+06	4.68366e+06	2.6953e+06	2.99021e+06	6.54846e+06	4.09372e+06	4.58114e+06	3.13422e+06	6.01096e+06	3.96114e+06	5.29199e+06	7.7894e+06	4.96296e+06	4.4512e+06	6.31482e+06	5.32023e+06	2.2287e+06	3.02404e+06	6.61327e+06	5.11284e+06	4.72927e+06	9.54138e+06	3.10494e+06	3.4743e+06	4.29729e+06	3.17238e+06	3.37253e+06	3.50479e+06	3.29247e+06
M153T72	153.033	71.7	1.2	5.26817e+06	1.12761e+08	1.90936e+08	1.24458e+08	1.27341e+08	1.40522e+08	1.19927e+08	7.7223e+07	6.27788e+06	1.41205e+08	8.7005e+07	1.54698e+08	9.85957e+07	1.02758e+07	1.93286e+08	1.04931e+08	8.48235e+07	4.81046e+07	1.16698e+08	7.96896e+07	1.35691e+08	1.36512e+08	1.29535e+08	5.92941e+07	7.68128e+07	1.08261e+08	1.17489e+08	7.68048e+07	7.76715e+07	8.47071e+07	7.55976e+07
M153T90	153.076	90.1	1.5	3.05473e+06	7.63632e+06	6.68413e+06	4.89138e+06	6.30535e+06	4.55806e+06	1.24184e+07	6.80555e+06	2.90856e+06	2.74834e+06	2.57516e+06	3.48813e+06	1.23202e+06	4.69144e+06	2.77024e+06	2.02775e+06	3.66481e+06	1.23882e+06	2.44968e+06	2.85711e+06	1.92674e+06	1.72632e+06	1.68413e+06	2.73778e+06	3.68244e+06	2.80788e+06	3.72911e+06	3.45701e+06	3.80811e+06	3.98822e+06	3.81095e+06
M154T111	154.097	111.2	1.9	439262	458162	504729	528330	510622	432588	719897	591790	2.31196e+06	2.17123e+06	2.06371e+06	2.09528e+06	1.93281e+06	1.95359e+06	2.5419e+06	2.00689e+06	776686	2.81474e+06	933513	463108	880868	1.64212e+06	1.9703e+06	2.15352e+06	1.05208e+06	1.07354e+06	1.20968e+06	1.07358e+06	1.04671e+06	1.04749e+06	1.07407e+06
M154T114	154.003	114.3	1.9	3.40935e+07	1.01488e+07	1.09574e+07	1.4186e+07	1.34392e+07	1.47781e+07	1.33426e+07	1.26024e+07	1.09398e+07	1.75933e+07	1.26186e+07	1.17078e+07	1.05723e+07	2.48454e+07	1.22703e+07	1.18145e+07	1.12392e+07	1.30229e+07	2.68501e+07	1.16527e+07	1.22213e+07	1.39139e+07	1.1132e+07	1.14873e+07	1.24624e+07	1.24182e+07	1.28145e+07	1.28157e+07	1.28006e+07	1.04866e+07	1.13929e+07
M154T115	154.086	114.9	1.9	1.44729e+06	1.0173e+06	1.96786e+06	2.20443e+06	1.52071e+06	1.53604e+06	2.00156e+06	2.20821e+06	1.71239e+06	1.63825e+06	2.56133e+06	2.45321e+06	2.08608e+06	2.70658e+06	1.27181e+06	1.62912e+06	1.48773e+06	1.47205e+06	1.29677e+06	2.08585e+06	1.50697e+06	1.40946e+06	759812	1.29266e+06	1.79034e+06	1.56654e+06	1.7503e+06	1.75004e+06	1.78974e+06	1.79e+06	1.78993e+06
M154T122_1	154.025	122	2	6.22105e+06	6.0107e+06	4.8786e+06	5.61991e+06	5.71009e+06	4.44961e+06	4.67491e+06	6.89515e+06	5.63058e+06	4.514e+06	1.08168e+07	3.05939e+07	5.76654e+06	1.19892e+07	7.94541e+06	6.57309e+06	1.58504e+06	5.40958e+06	3.17503e+06	5.57777e+06	5.27081e+06	7.89919e+06	1.65268e+06	3.94723e+06	5.77237e+06	5.80532e+06	5.77206e+06	5.75822e+06	5.4887e+06	5.51575e+06	4.99478e+06
M154T122_2	154.044	122	2	2.23945e+07	2.14092e+07	1.66076e+07	1.72391e+07	2.49409e+07	2.97545e+07	2.39635e+07	1.74176e+07	2.56084e+07	2.59209e+07	2.24931e+07	2.3098e+07	2.9223e+07	2.49669e+07	3.01531e+07	2.73695e+07	1.71019e+07	1.56368e+07	2.02395e+07	2.54762e+07	1.92629e+07	2.24533e+07	2.50309e+07	1.4054e+07	3.04579e+07	2.24952e+07	3.26347e+07	2.33566e+07	2.43617e+07	2.5663e+07	2.56337e+07
M154T160_2	154.044	160.2	2.7	3.42668e+07	4.73874e+06	2.50782e+07	2.37397e+07	4.98701e+07	1.57906e+07	4.93141e+07	4.80876e+07	2.31948e+07	1.04217e+07	3.90244e+07	7.44382e+07	7.82863e+06	3.88517e+07	8.28365e+06	2.41563e+07	2.21629e+07	6.2084e+06	8.08453e+06	4.07209e+07	2.33677e+07	2.79468e+07	4.57262e+06	1.00541e+07	2.6142e+07	2.61194e+07	9.34455e+06	2.47705e+07	2.61071e+07	2.61258e+07	2.46199e+07
M154T196	154.05	196.3	3.3	3.07849e+06	5.33476e+06	3.87145e+06	5.6217e+06	3.8201e+06	1.95649e+06	6.05657e+06	4.95285e+06	2.76832e+06	2.72052e+06	2.48739e+06	4.01309e+06	1.93105e+06	4.23317e+06	2.299e+06	2.66134e+06	4.81467e+06	1.23594e+06	4.82962e+06	4.05133e+06	4.18055e+06	2.53711e+06	2.2346e+06	3.15703e+06	2.4789e+06	2.65411e+06	2.84989e+06	2.824e+06	2.77571e+06	2.77643e+06	2.86764e+06
M154T280	154.021	279.8	4.7	4.02146e+06	8437.4	26533.8	5.10355e+06	4.32905e+06	5.1366e+06	44507.7	12891.3	5.73186e+06	4.60126e+06	33714.5	10016.5	20097.2	7296.74	4605.83	22879.3	27625.3	32553.2	3.86857e+06	18270.5	65671.8	4.03966e+06	10626.5	19136.1	2.18917e+06	1.96391e+06	2.70269e+06	2.24975e+06	2.24814e+06	2.2482e+06	1.96956e+06
M154T341	154.061	340.8	5.7	2.23094e+06	2.97787e+06	3.86192e+06	114562	4.12897e+06	1.82785e+06	3.1205e+06	2.14239e+06	3.00276e+06	2.55388e+06	5.43439e+06	730808	630546	427109	3.15045e+06	417882	1.85489e+06	2.87872e+06	916529	4.4688e+06	1.55849e+06	1.98245e+06	2.00241e+06	2.68551e+06	2.16245e+06	2.16303e+06	2.16969e+06	2.64975e+06	2.646e+06	1.0457e+06	2.19315e+06
M154T400	154.042	399.5	6.7	3.53923e+08	1.21356e+08	1.77695e+08	3.882e+08	4.36647e+08	1.95061e+08	1.36249e+08	2.33654e+08	3.84621e+08	4.22158e+08	3.15597e+08	3.39772e+08	8.20561e+08	3.20197e+08	3.68854e+08	3.68526e+08	4.40898e+08	3.27033e+08	4.77452e+08	4.09015e+08	4.9758e+08	5.36489e+08	4.95549e+08	1.64652e+08	3.11288e+08	3.85093e+08	2.72505e+08	4.26498e+08	3.73472e+08	4.10475e+08	4.10575e+08
M154T582	154.042	581.8	9.7	3.30465e+06	1.13141e+06	1.32714e+06	1.69106e+06	945906	2.14294e+06	1.19933e+06	822595	1.73779e+06	2.8879e+06	1.20837e+06	5.31661e+06	4.89317e+06	1.84594e+06	870574	1.87913e+06	8.5666e+06	1.17577e+06	9.40601e+06	6.06496e+06	1.93299e+06	688133	1.68299e+06	1.99519e+06	2.15502e+06	2.57898e+06	2.66936e+06	2.63746e+06	1.18227e+06	2.64514e+06	2.63511e+06
M154T72	154.036	71.8	1.2	4.65311e+06	4.54847e+06	4.61341e+06	4.60156e+06	4.32599e+06	4.01324e+06	5.06884e+06	4.70974e+06	4.83974e+06	5.13702e+06	4.57286e+06	4.59541e+06	4.43395e+06	5.24939e+06	4.62834e+06	4.68741e+06	4.93183e+06	5.34723e+06	5.04303e+06	4.59415e+06	4.94662e+06	4.66527e+06	4.76999e+06	4.998e+06	4.62219e+06	4.65591e+06	4.62663e+06	4.627e+06	4.65519e+06	4.627e+06	4.66337e+06
M154T95	154.059	94.5	1.6	2.46584e+07	2.59423e+07	1.57533e+07	3.50052e+07	1.49521e+07	1.51254e+07	1.15524e+07	1.21197e+07	2.34224e+07	9.85346e+06	2.60233e+07	1.76703e+07	9.71685e+06	5.43737e+06	7.47924e+06	7.94152e+06	1.50801e+07	6.54921e+06	1.38782e+07	1.07056e+07	7.54017e+06	1.89959e+07	1.44446e+07	1.47511e+07	1.12871e+07	1.35839e+07	1.29793e+07	1.48878e+07	1.29787e+07	1.35389e+07	1.55018e+07
M155T114	154.504	114.3	1.9	147226	1.45432e+06	1.41164e+06	54336.6	160457	288655	1.47785e+06	1.26425e+06	221919	162085	1.37588e+06	1.0979e+06	1.18554e+06	1.11369e+06	998913	1.02147e+06	1.05848e+06	1.02739e+06	46719.1	1.14921e+06	822238	312123	810848	983541	1.13666e+06	1.09196e+06	1.14338e+06	1.09025e+06	1.13666e+06	585091	1.09061e+06
M155T160	155.045	160.1	2.7	1.45226e+06	1.53617e+06	1.57984e+06	1.96745e+06	1.52405e+06	1.86384e+06	1.06703e+06	770203	1.08291e+06	682918	724283	1.46727e+06	1.19206e+06	1.1211e+06	1.58447e+06	1.28963e+06	991445	822472	991852	1.29008e+06	93347.3	1.44504e+06	1.76082e+06	1.41315e+06	1.48399e+06	1.39999e+06	1.48372e+06	1.51717e+06	1.51537e+06	1.48452e+06	1.54638e+06
M155T432	155.155	432.3	7.2	6.14474e+06	1.45618e+06	4.56248e+06	4.16177e+06	1.77052e+07	3.53345e+06	1.01737e+07	7.9535e+06	8.48688e+06	1.13393e+07	6.99618e+06	3.42792e+06	7.01287e+06	1.04882e+07	5.1082e+06	1.0372e+07	6.50384e+06	4.30805e+06	9.70172e+06	5.75472e+06	7.95522e+06	4.63155e+06	7.74568e+06	5.6839e+06	5.25596e+06	5.34977e+06	5.26248e+06	4.97233e+06	5.25174e+06	4.9374e+06	4.82245e+06
M155T517	155.107	516.5	8.6	2.6258e+06	1.14705e+07	1.95287e+06	4.57437e+06	2.13924e+06	5.54803e+06	7.94161e+06	2.14046e+06	1.24391e+07	3.48418e+06	6.14495e+06	1.19109e+07	3.31961e+06	7.41199e+06	8.0383e+06	9.48614e+06	4.60375e+06	2.03374e+06	3.19512e+06	4.50414e+06	9.80706e+06	5.98284e+06	6.06807e+06	4.01662e+06	7.44674e+06	7.14449e+06	7.57039e+06	7.57589e+06	7.17643e+06	7.59147e+06	3.87797e+06
M155T570	155.06	569.8	9.5	127875	101564	253565	177396	58829.1	112008	654170	351652	166884	387144	252618	154707	244372	391972	233900	147833	140228	179396	131749	290431	306245	777460	222393	142413	665817	1.03354e+06	790181	936795	678906	667080	654429
M155T604	155.047	603.6	10.1	1.01767e+06	808259	862953	888002	775900	715159	1.09655e+06	865413	604502	541488	989137	426691	1.90317e+06	1.14681e+06	1.26447e+06	479182	841817	951483	738017	1.89286e+06	1.0929e+06	995268	269465	669605	1.03102e+06	401836	906257	898438	974312	978127	916313
M155T72	155.03	71.8	1.2	1.2761e+06	801210	1.0768e+06	864916	781965	1.04376e+06	1.45781e+06	1.10619e+06	1.25901e+06	1.1383e+06	1.5291e+06	1.20417e+06	1.52891e+06	1.16231e+06	1.32168e+06	1.28126e+06	1.13672e+06	1.12331e+06	1.42177e+06	1.33895e+06	940150	2.32416e+06	1.16276e+06	1.27148e+06	1.13911e+06	1.14169e+06	1.15108e+06	1.16155e+06	1.16032e+06	1.14502e+06	1.16588e+06
M155T77	155.079	77.3	1.3	436048	126865	607886	253463	1.32746e+06	453313	223575	1.01033e+06	2.2601e+06	2.62636e+06	2.06056e+06	1.8159e+06	1.87563e+06	3.09114e+06	1.83298e+06	1.96903e+06	2.08272e+06	1.56892e+06	1.92383e+06	1.99486e+06	1.5503e+06	2.10033e+06	1.96135e+06	1.79571e+06	1.38475e+06	1.38612e+06	1.46885e+06	1.18323e+06	1.44626e+06	1.44736e+06	1.4458e+06
M155T798	154.99	798	13.3	2.46411e+08	1.49725e+08	4.40472e+08	1.66259e+08	4.28671e+08	5.96237e+08	2.00633e+08	2.65259e+08	1.65291e+08	3.13192e+08	5.04255e+08	3.10899e+08	2.17185e+08	3.66179e+08	1.56349e+08	2.00856e+08	3.76316e+08	2.81654e+08	3.46624e+08	3.97044e+08	2.34691e+08	2.72406e+08	2.5079e+08	1.28822e+08	1.86531e+08	2.19673e+08	2.33602e+08	2.05788e+08	2.17433e+08	2.03249e+08	2.17931e+08
M155T84	155.043	83.5	1.4	9.62638e+06	7.52122e+06	5.71071e+06	6.43666e+06	6.42649e+06	5.59442e+06	7.02366e+06	6.00165e+06	7.04277e+06	6.44568e+06	5.974e+06	7.85872e+06	6.87345e+06	7.76286e+06	6.73139e+06	6.28763e+06	6.58167e+06	8.33091e+06	6.69814e+06	8.49003e+06	6.91839e+06	6.37067e+06	8.0811e+06	7.20524e+06	6.70571e+06	4.3506e+06	7.64771e+06	4.53805e+06	6.77872e+06	6.17425e+06	6.33196e+06
M155T90	155.01	90.4	1.5	2.31485e+06	3.08704e+06	3.01417e+06	2.89801e+06	2.82993e+06	3.77023e+06	3.34785e+06	3.98876e+06	3.3704e+06	4.00978e+06	3.9461e+06	3.38462e+06	2.46954e+06	3.80823e+06	2.49672e+06	2.58085e+06	2.92093e+06	6.59363e+06	2.51054e+06	3.82106e+06	2.99223e+06	3.15584e+06	4.12019e+06	4.30839e+06	2.80074e+06	2.80232e+06	2.81191e+06	2.98925e+06	3.71434e+06	2.70396e+06	3.79879e+06
M155T98	155.072	97.8	1.6	2.88595e+06	2.74643e+06	2.56522e+06	2.75207e+06	2.4371e+06	1.96914e+06	2.60094e+06	2.34654e+06	2.42543e+06	2.39925e+06	3.69722e+06	2.73714e+06	1.83847e+06	2.25585e+06	2.28845e+06	2.036e+06	2.8031e+06	1.48127e+06	3.25108e+06	2.35313e+06	2.45618e+06	3.65704e+06	2.91652e+06	4.00174e+06	2.32881e+06	2.39094e+06	2.19668e+06	2.38879e+06	2.38508e+06	2.33295e+06	2.47924e+06
M156T114	156.059	114.3	1.9	4.34318e+06	3.10303e+06	2.83599e+06	4.85118e+06	7.76361e+06	9.04514e+06	1.93639e+07	9.06542e+06	4.92444e+06	1.24866e+07	9.68269e+06	4.55519e+06	4.64811e+06	1.72741e+07	823017	2.57038e+07	1.61022e+07	2.98847e+06	2.4894e+07	1.31734e+07	7.75712e+06	6.63136e+06	3.70629e+06	4.53214e+06	3.24407e+06	3.22368e+06	3.23706e+06	3.24043e+06	3.60633e+06	3.23376e+06	5.12093e+06
M156T181	156.138	181	3	3.06359e+06	4.25564e+06	3.52057e+06	5.6065e+06	1.05016e+06	2.97346e+06	2.54764e+06	1.95179e+06	2.27359e+06	2.69318e+06	1.51978e+06	4.53857e+06	3.27995e+06	3.8292e+06	4.18942e+06	4.19224e+06	3.49064e+06	3.68085e+06	3.65198e+06	3.62563e+06	802260	2.18183e+06	4.60223e+06	2.46103e+06	4.2479e+06	4.24548e+06	4.35982e+06	3.8747e+06	4.35067e+06	4.35393e+06	4.35079e+06
M156T400	156.039	399.5	6.7	1.0756e+08	3.567e+08	9.60048e+07	8.93734e+07	2.11815e+07	5.52452e+07	7.98636e+07	7.70603e+07	1.23537e+08	2.6445e+08	1.94795e+08	1.9189e+08	2.15389e+08	1.49287e+08	2.8073e+08	2.77365e+08	1.11883e+08	1.63571e+08	2.96564e+08	3.03761e+08	1.18735e+08	9.6856e+07	9.30526e+07	1.63027e+08	1.37624e+08	1.30322e+08	1.29702e+08	1.24799e+08	1.39515e+08	1.2962e+08	1.30628e+08
M156T407	156.066	407.2	6.8	2.50356e+06	407303	644030	801083	2.09497e+06	1.28192e+06	2.4992e+06	548880	1.7492e+06	2.0955e+06	1.88397e+06	934023	1.27345e+06	2.00784e+06	3.34399e+06	3.48627e+06	710742	802259	1.21418e+06	697883	1.9506e+06	1.00798e+06	1.80518e+06	824228	1.08397e+06	1.11241e+06	1.34711e+06	912716	1.02241e+06	1.31949e+06	1.02618e+06
M156T427	156.102	427.4	7.1	302534	260443	316340	188961	899796	659714	180376	164604	2.46684e+06	1.90957e+06	2.49736e+06	2.1424e+06	2.34098e+06	1.7866e+06	1.9473e+06	1.87908e+06	1.64557e+06	1.97317e+06	1.3287e+06	2.06991e+06	2.0494e+06	2.9717e+06	2.83053e+06	4.33244e+06	1.33951e+06	1.1887e+06	1.53727e+06	1.34453e+06	1.53382e+06	1.15925e+06	1.40912e+06
M156T502	156.08	502.1	8.4	902242	1.01523e+06	1.0097e+06	648344	685567	528598	729221	914697	737903	616577	702348	1.17522e+06	682994	1.1328e+06	736014	1.15503e+06	642947	608635	769730	429546	611813	1.05999e+06	946104	986287	731621	867350	799127	801175	808179	857095	856741
M156T582	156.039	581.8	9.7	345070	308719	229122	499500	453640	75035.5	363912	122862	132902	314681	262820	363911	398709	133581	102102	231256	989124	65011.5	1.01303e+06	775286	127596	101982	379708	134656	328918	332091	338390	329077	338767	238605	333261
M156T606	156.128	606	10.1	946137	2.21031e+06	1.14967e+06	358194	1.27601e+06	535892	1.40252e+06	1.54675e+06	1.40746e+06	1.60843e+06	1.62626e+06	695203	1.75854e+06	1.66314e+06	750066	896253	657341	817313	1.43278e+06	3.10532e+06	1.91117e+06	1.87942e+06	914792	1.28103e+06	833723	1.28185e+06	1.28058e+06	1.18454e+06	1.27022e+06	1.45567e+06	1.14166e+06
M156T72	156.014	71.7	1.2	4.06446e+06	1.53802e+07	6.10447e+06	5.55113e+06	1.63106e+07	1.8624e+07	1.06517e+07	6.39325e+06	1.1637e+07	6.65975e+06	1.92805e+07	2.52432e+07	1.33972e+07	1.53617e+07	8.27016e+06	7.38383e+06	1.73464e+07	8.38043e+06	1.85425e+07	1.06141e+07	1.13541e+07	9.05469e+06	6.59943e+06	9.49752e+06	9.19946e+06	8.71076e+06	9.93916e+06	9.18874e+06	1.00721e+07	9.19973e+06	1.05964e+07
M156T76	156.15	76	1.3	747990	417785	53962.8	773133	431202	88425.7	76907.1	197821	681618	19263.5	556945	505857	228259	271619	36374.5	30501.4	279669	584050	911287	364769	26018.3	278346	34970.3	241664	411275	411538	409561	270347	410334	404930	395463
M156T776	156.12	776.3	12.9	7.07182e+06	1.61117e+07	7.76702e+06	2.03413e+07	1.06874e+07	7.728e+06	1.98845e+07	1.83194e+07	1.91947e+07	8.6585e+06	1.35719e+07	1.94265e+07	2.33497e+07	1.75109e+07	1.88065e+07	1.20965e+07	2.08731e+07	2.23013e+07	2.03983e+07	7.05663e+06	1.77355e+07	2.45027e+07	7.54801e+06	1.38071e+07	1.38791e+07	1.24924e+07	1.3908e+07	1.25952e+07	1.16072e+07	1.25343e+07	1.39606e+07
M156T815	156.138	815.4	13.6	2.14369e+06	1.72631e+06	3.01603e+06	4.60771e+06	1.98269e+06	2.06192e+06	3.46233e+06	1.5171e+06	2.81198e+06	2.50079e+06	4.93233e+06	3.02696e+06	1.62342e+06	1.84253e+06	1.29033e+06	1.63563e+06	3.49368e+06	1.47649e+06	1.6066e+06	2.04137e+06	2.69855e+06	1.26509e+06	3.42459e+06	3.30896e+06	2.17415e+06	2.76444e+06	2.90789e+06	2.91142e+06	2.01892e+06	2.8998e+06	2.90878e+06
M156T83	156.077	82.8	1.4	7.06492e+07	1.51987e+08	1.67734e+08	7.77142e+07	2.1388e+08	1.71493e+08	1.81187e+08	2.15535e+08	1.64906e+08	1.62897e+08	1.30789e+08	1.39655e+08	1.675e+08	1.6104e+08	1.4014e+08	1.67854e+08	3.13014e+07	3.61926e+07	1.68851e+08	3.20626e+07	3.2077e+07	1.15474e+08	1.45993e+08	1.72401e+08	1.46661e+08	1.48912e+08	1.56902e+08	1.47233e+08	1.55666e+08	1.55806e+08	7.66716e+07
M157T102	156.961	102.1	1.7	1.88371e+06	2.91799e+06	4.12435e+06	1.19487e+06	2.98067e+06	2.61583e+06	4.57472e+06	4.61049e+06	2.06487e+06	3.09096e+06	3.0004e+06	2.66397e+06	6.07283e+06	2.7659e+06	3.5014e+06	3.45956e+06	3.85265e+06	3.96196e+06	4.53587e+06	2.60063e+06	2.51864e+06	551425	1.72833e+06	2.85967e+06	2.99655e+06	2.99859e+06	2.99545e+06	2.89356e+06	3.23027e+06	3.23095e+06	3.25614e+06
M157T108	157.097	108.2	1.8	1.92296e+07	1.00802e+07	9.71562e+06	1.93285e+07	9.32699e+06	8.69353e+06	8.97905e+06	9.06044e+06	6.89579e+06	5.86904e+06	7.82622e+06	9.71884e+06	8.3033e+06	8.61096e+06	1.27033e+07	1.04966e+07	8.54272e+06	1.1274e+07	1.21683e+07	8.62141e+06	8.45421e+06	9.59129e+06	6.01033e+06	7.71162e+06	7.45111e+06	7.71846e+06	7.70928e+06	7.4737e+06	7.67551e+06	7.46248e+06	9.54241e+06
M157T114	157.011	114.1	1.9	283136	228756	308179	314578	265875	264862	286316	272729	4491.53	7276.4	34409.1	16419.9	2041.67	110073	13319.4	20478.2	333704	4655.89	312232	211181	308213	148345	116832	196371	157533	57564.7	161652	168933	167866	167735	163665
M157T115	157.043	114.7	1.9	158022	227565	249506	174367	306111	108708	535598	347419	60762.8	89084.5	47675.4	82031.2	35654.9	135382	78972.8	71320	264172	37416.4	180334	361723	246757	56465.3	29246	96435	163988	128810	178166	172427	172417	167866	172325
M157T357	157.038	356.6	5.9	363168	472269	536402	1.34096e+06	441087	425150	327699	235509	171842	407522	293663	1.00914e+06	298068	1.01593e+06	304411	415585	396799	317103	374965	244570	615132	578641	322575	516515	776311	674179	931237	566632	574454	557281	539902
M157T397	157.076	397	6.6	24716.9	345258	225952	40771.8	39627.7	6776.02	285189	189517	23272	38692.5	68257.8	361371	225320	199786	244300	263688	152319	241875	159343	31216.7	158578	30855.7	186431	215145	271572	233133	233352	233053	182203	214440	192393
M157T400	157.042	399.5	6.7	2.52752e+07	1.03044e+07	9.17878e+06	2.25341e+07	1.30291e+07	1.17301e+07	1.10515e+07	7.22824e+06	6.94876e+06	8.62758e+06	6.46378e+06	5.80863e+06	2.13581e+07	1.79929e+07	4.52372e+06	1.56217e+07	1.21825e+07	5.23694e+06	1.59651e+07	5.12133e+06	5.02322e+06	9.08033e+06	1.14902e+07	1.33138e+07	1.12737e+07	8.98938e+06	1.29852e+07	1.058e+07	1.13519e+07	1.13364e+07	1.05272e+07
M157T564	157.134	563.6	9.4	1.11176e+06	1.23431e+06	3.18423e+06	1.10067e+06	1.22447e+06	2.2285e+06	2.86973e+06	1.20766e+06	1.36216e+06	2.72248e+06	3.00168e+06	3.38138e+06	1.02771e+06	5.09043e+06	1.28529e+06	3.23595e+06	2.76254e+06	3.31965e+06	1.46892e+06	870881	3.19903e+06	2.57665e+06	3.70202e+06	3.1821e+06	1.57413e+06	1.48337e+06	1.33978e+06	1.35947e+06	1.68609e+06	1.478e+06	1.35381e+06
M157T606	156.63	606.1	10.1	165732	292062	300312	142354	190860	204729	324938	248763	92253.1	115332	108276	215211	294690	313287	119937	125812	102142	438969	114316	163477	117339	438280	80684.6	106223	278947	259711	247246	134777	248395	263279	247727
M157T65	156.965	64.6	1.1	1.25753e+06	1.48585e+06	1.421e+06	1.43722e+06	1.98857e+06	1.41647e+06	1.58497e+06	1.64792e+06	2.66296e+06	1.51065e+06	1.94125e+06	1.27375e+06	1.10902e+06	1.36532e+06	1.12056e+06	1.6e+06	1.85868e+06	1.77205e+06	1.62069e+06	2.41224e+06	1.95771e+06	1.43622e+06	1.45211e+06	2.35754e+06	1.6756e+06	1.26612e+06	1.3066e+06	1.51806e+06	1.50592e+06	1.34282e+06	1.96322e+06
M157T707	157.05	707.2	11.8	224294	605046	262118	300680	324428	429013	608708	271513	311910	311536	209296	291843	419643	268658	459890	428390	357816	179023	257894	354861	255844	495566	516373	163076	378967	335115	320096	379758	415989	364925	378671
M157T72	157.015	71.7	1.2	873523	813101	981522	1.06921e+06	1.46943e+06	948818	1.02885e+06	953673	880727	904710	1.00461e+06	950916	1.33026e+06	854662	735302	967468	1.07862e+06	996479	1.35042e+06	929662	1.1113e+06	764083	806158	598967	856783	897164	866794	879661	879593	880128	838805
M157T74	157.17	74.4	1.2	1.86223e+07	1.86419e+07	1.90732e+07	1.88852e+07	1.90165e+07	1.94602e+07	1.84742e+07	1.82281e+07	1.89068e+07	1.71117e+07	1.80171e+07	1.90711e+07	1.8242e+07	1.85218e+07	1.85816e+07	1.89405e+07	1.81681e+07	2.41751e+07	2.56599e+07	2.00267e+07	1.84929e+07	1.87475e+07	1.84624e+07	1.63277e+07	1.77245e+07	1.81623e+07	1.80489e+07	1.78904e+07	1.81454e+07	1.78942e+07	1.82773e+07
M157T801	156.991	801.4	13.4	3.727e+07	1.59708e+07	2.38454e+07	3.2799e+07	5.16492e+07	2.48966e+07	2.24147e+07	3.29776e+07	1.76174e+07	4.95494e+07	1.87961e+07	4.73502e+07	1.79485e+07	4.38e+07	2.04209e+07	3.50374e+07	3.97939e+07	2.65047e+07	2.69009e+07	1.37511e+07	4.49235e+07	4.24901e+07	6.27788e+07	5.79441e+07	2.98719e+07	3.76937e+07	3.47914e+07	3.76742e+07	3.49521e+07	3.65174e+07	3.75769e+07
M157T90	156.99	90.1	1.5	116221	268145	155074	221716	477351	105767	1.79488e+06	301379	654044	457733	399418	511489	8.98985e+06	305232	1.89993e+06	2.04162e+06	2.59986e+06	1.26039e+07	8.7099e+06	2.78721e+06	2.14934e+06	409890	3.45976e+06	3.50719e+06	2.63287e+06	2.48409e+06	2.51707e+06	2.77458e+06	2.64028e+06	2.63115e+06	935569
M157T99	157.097	98.6	1.6	5.69311e+06	5.94686e+06	8.27147e+06	5.49428e+06	5.6667e+06	5.51078e+06	8.1207e+06	9.24808e+06	2.49283e+06	2.16883e+06	4.64153e+06	957461	1.53203e+06	4.21429e+06	2.5325e+06	2.39358e+06	5.14952e+06	1.33155e+06	3.6983e+06	1.0115e+07	4.58789e+06	3.7358e+06	1.43916e+06	3.195e+06	4.33357e+06	4.33255e+06	4.12668e+06	4.40045e+06	4.74017e+06	4.57111e+06	4.39996e+06
M158T108	158.1	108.3	1.8	282302	291481	290433	318919	346736	163222	141761	274130	3.36478e+06	3.90507e+06	3.41503e+06	3.4595e+06	3.59482e+06	3.06285e+06	4.21175e+06	4.89781e+06	427947	4.19015e+06	360782	108506	308544	2.72919e+06	3.22586e+06	2.95423e+06	2.36291e+06	2.04459e+06	1.99467e+06	2.04447e+06	1.94799e+06	2.04317e+06	2.04323e+06
M158T112	158.045	112	1.9	1.70823e+06	1.44072e+06	1.37046e+06	1.60974e+06	1.6391e+06	1.58315e+06	1.60816e+06	1.42917e+06	1.9235e+06	1.62474e+06	1.80242e+06	1.87391e+06	1.88979e+06	1.85568e+06	1.6934e+06	2.26638e+06	1.58636e+06	1.99631e+06	1.58552e+06	1.62117e+06	1.43252e+06	1.66779e+06	1.5702e+06	1.45226e+06	2.05856e+06	1.83274e+06	1.66252e+06	1.71443e+06	1.68584e+06	1.72408e+06	1.97078e+06
M158T115_1	158.081	115.1	1.9	1.24675e+06	1.22703e+06	4.20776e+06	1.79211e+06	1.39586e+06	3.69544e+06	1.36267e+06	3.78271e+06	9.57156e+06	8.47288e+06	1.01996e+07	8.67072e+06	8.40543e+06	9.38992e+06	9.32703e+06	9.55566e+06	3.61835e+06	1.02344e+07	1.37917e+06	3.1239e+06	3.97067e+06	7.92202e+06	9.17147e+06	1.0084e+07	5.91794e+06	6.70228e+06	5.7306e+06	5.90991e+06	5.72989e+06	5.71554e+06	5.42807e+06
M158T115_2	158.118	115.1	1.9	1.35059e+06	1.26221e+06	1.41552e+06	1.5224e+06	1.58343e+06	1.1921e+06	870461	1.05646e+06	2.602e+06	2.57179e+06	1.77224e+06	2.10672e+06	1.65376e+06	2.37225e+06	1.27467e+06	1.80519e+06	1.53758e+06	2.52186e+06	2.01927e+06	796612	1.7097e+06	1.30704e+06	2.04966e+06	4.10135e+06	1.43042e+06	1.50324e+06	1.69017e+06	1.50261e+06	1.48763e+06	1.43061e+06	1.42555e+06
M158T116	158.027	116.4	1.9	425591	356433	161710	533896	158287	268000	320099	328746	321623	407573	374728	504422	334789	218023	134427	270777	116469	266484	570116	306539	322834	281215	260395	282759	318471	159337	333586	366879	364351	196938	397326
M158T135	158.081	135.4	2.3	2.90577e+06	2.16746e+06	5.46591e+06	7.28646e+06	2.53166e+06	2.19868e+06	6.71725e+06	5.58137e+06	5.10784e+06	2.00849e+06	6.43327e+06	3.93023e+06	1.17969e+07	2.63155e+06	3.38318e+06	1.24612e+07	1.16187e+07	6.18437e+06	3.27015e+06	1.28551e+06	2.08446e+06	3.55839e+06	4.23153e+06	7.04149e+06	5.1853e+06	5.17417e+06	3.3525e+06	4.80794e+06	4.53131e+06	5.14313e+06	5.13591e+06
M158T356	158.036	356.4	5.9	2.43622e+06	1.03312e+07	1.53554e+07	7.6029e+06	2.61888e+07	2.59257e+07	5.57115e+06	5.13733e+06	2.51712e+07	2.12202e+07	3.69341e+06	4.84607e+06	1.72169e+07	9.23026e+06	1.69868e+07	1.70562e+07	2.12388e+07	5.77729e+06	9.88851e+06	2.6768e+07	2.26844e+07	2.22878e+07	4.86545e+06	4.70854e+06	1.49325e+07	1.7039e+07	1.70633e+07	1.73729e+07	9.6228e+06	1.59847e+07	1.89384e+07
M158T375	158.064	374.9	6.2	145508	182933	145854	187714	190369	177684	180553	172092	201879	240749	189983	209032	212450	216942	214517	218726	219714	205671	263094	217976	247443	192662	157939	216296	164112	171803	177391	171338	176832	176801	175138
M158T403	158.001	403.3	6.7	5.23266e+06	1.84565e+06	2.50386e+06	2.56003e+06	3.5091e+06	2.45367e+06	2.79406e+06	2.72748e+06	1.60495e+06	3.07018e+06	2.68833e+06	1.55181e+06	3.3967e+06	2.71533e+06	3.94614e+06	3.02599e+06	2.83409e+06	2.48123e+06	1.35715e+06	2.73325e+06	3.22896e+06	2.77898e+06	3.70332e+06	2.06821e+06	2.77087e+06	2.88197e+06	2.51468e+06	2.51414e+06	2.60204e+06	3.34192e+06	2.78938e+06
M158T511	158.117	511.5	8.5	1.66253e+06	1.86703e+06	2.21814e+06	1.62544e+07	3.38463e+06	2.17074e+06	2.16715e+06	5.24785e+06	2.82344e+06	2.23433e+06	5.44355e+06	2.97947e+06	2.48733e+06	3.45669e+06	1.33107e+06	1.81252e+06	2.02561e+06	4.34318e+06	2.31244e+06	1.48159e+06	1.26693e+06	1.27268e+06	1.22627e+06	5.79044e+06	2.87645e+06	2.5551e+06	2.73916e+06	3.58592e+06	2.53992e+06	2.54422e+06	2.54709e+06
M158T576	158.001	576	9.6	9.92229e+06	5.57208e+06	2.93973e+06	2.63019e+06	4.25159e+06	329831	1.57189e+07	1.0538e+07	5.88829e+06	7.21243e+06	2.2012e+07	1.48583e+07	515352	1.13754e+07	1.38235e+06	1.22655e+06	2.24114e+07	795644	9.16644e+06	1.00524e+06	631359	1.54415e+06	7.94343e+06	8.93188e+06	4.79717e+06	5.63905e+06	4.25764e+06	4.24793e+06	4.29535e+06	3.50921e+06	7.77227e+06
M158T59	158.002	58.9	1	1.67825e+07	1.40182e+07	1.35029e+07	2.12067e+07	1.30083e+07	1.80116e+07	1.36225e+07	1.23408e+07	1.4561e+07	2.03729e+07	2.23434e+07	1.72791e+07	1.5419e+07	1.39231e+07	1.67796e+07	1.55468e+07	1.51321e+07	1.1621e+07	1.28238e+07	2.02556e+07	1.56147e+07	2.09722e+07	2.02819e+07	2.42769e+07	1.55192e+07	1.7837e+07	1.76429e+07	1.76196e+07	1.76384e+07	1.61622e+07	1.76664e+07
M158T634	158.001	634	10.6	1.03305e+07	1.04653e+07	1.0407e+07	1.09202e+07	1.77163e+07	1.27414e+07	8.98991e+06	1.2825e+07	4.44697e+06	1.9796e+07	3.33569e+07	1.73427e+07	4.16365e+06	2.53368e+07	2.01461e+07	2.19133e+07	1.85163e+07	2.52196e+07	1.58035e+07	2.1121e+07	1.09206e+07	1.1569e+07	1.22999e+07	1.45286e+07	9.67025e+06	1.16568e+07	1.10564e+07	1.1069e+07	1.22754e+07	1.28266e+07	1.10863e+07
M158T685	158.19	685.2	11.4	649734	342990	916086	185575	788074	505397	694729	336161	221020	688726	389904	424973	155167	811986	668797	303659	874594	1.11358e+06	113856	225187	145662	514597	267801	402472	436819	493708	491219	440399	490503	492075	252608
M158T707	158.036	706.5	11.8	223595	339787	194415	350627	211395	298851	323030	202042	302107	285254	380087	366820	192370	511584	271874	240504	181186	299861	309160	229758	354079	194988	258171	259499	321857	292281	318299	318004	298704	324040	291376
M158T74_1	158.002	74.2	1.2	9.76845e+06	1.0629e+07	9.9675e+06	7.70889e+06	8.94213e+06	2.03551e+06	1.09493e+07	8.95099e+06	7.9733e+06	7.01212e+06	1.05494e+07	6.00145e+06	6.959e+06	5.86606e+06	7.51543e+06	1.1642e+07	9.57069e+06	9.34375e+06	9.89768e+06	7.24733e+06	4.59593e+06	1.08621e+07	9.70008e+06	1.09565e+07	8.12288e+06	7.54525e+06	7.39329e+06	7.26553e+06	8.10158e+06	7.42067e+06	8.19011e+06
M158T74_2	158.173	74.5	1.2	1.22915e+06	2.04181e+06	1.6156e+06	1.74797e+06	1.48834e+06	1.58408e+06	1.23247e+06	1.13264e+06	1.00025e+06	640513	788668	1.25858e+06	1.36885e+06	1.53926e+06	1.42446e+06	1.68973e+06	1.29105e+06	726952	1.16291e+06	1.25304e+06	663145	1.04333e+06	1.59197e+06	795420	1.57357e+06	1.49174e+06	1.57395e+06	1.66629e+06	1.55032e+06	1.55055e+06	1.55047e+06
M158T742	158.154	742	12.4	8.40068e+06	2.84352e+06	7.66951e+06	1.03871e+07	7.87039e+06	9.14462e+06	8.00631e+06	1.01478e+07	4.01526e+06	1.21422e+07	1.14575e+07	7.97437e+06	7.85805e+06	1.4693e+07	7.60106e+06	3.66121e+06	1.1407e+07	2.4719e+06	1.10016e+07	4.86122e+06	6.20782e+06	9.38358e+06	1.07734e+07	9.966e+06	8.55415e+06	8.21359e+06	8.69489e+06	8.20382e+06	9.58582e+06	8.20121e+06	4.41649e+06
M158T760	158.154	759.9	12.7	1.06583e+08	1.2887e+08	1.12378e+08	8.3917e+07	5.8306e+07	1.02949e+08	1.34117e+08	1.71338e+08	1.25639e+08	9.97263e+07	1.81324e+08	1.06092e+08	9.69147e+07	1.34224e+08	1.81295e+08	1.62725e+08	2.33608e+08	1.45362e+08	1.07236e+08	3.49172e+08	1.66823e+08	1.23978e+08	1.04306e+08	9.44168e+07	1.7309e+08	1.7075e+08	1.57768e+08	1.6747e+08	1.85052e+08	1.73191e+08	1.11226e+08
M158T83	158.093	83.3	1.4	4.80436e+06	3.897e+06	6.5668e+06	5.72906e+06	5.33161e+06	4.55001e+06	7.86505e+06	6.21535e+06	392023	560064	1.55706e+06	1.88968e+06	463512	1.83603e+06	2.11406e+06	1.70755e+06	1.81851e+06	2.42017e+06	564804	2.19456e+06	1.64292e+06	1.80914e+06	406186	1.74046e+06	2.31123e+06	2.31392e+06	1.91205e+06	1.9207e+06	2.2933e+06	2.82793e+06	1.05918e+06
M158T832	158.154	832.2	13.9	3.65278e+07	3.95643e+07	4.24073e+07	4.30102e+07	3.62822e+07	4.79849e+07	4.97317e+07	3.1042e+07	4.39507e+07	4.67645e+07	4.73484e+07	5.56571e+07	3.15024e+07	4.50975e+07	5.00837e+07	4.06542e+07	4.49008e+07	3.689e+07	4.87575e+07	4.69629e+07	4.77049e+07	5.04963e+07	2.90119e+07	5.88833e+07	4.44792e+07	4.41656e+07	3.38945e+07	4.62497e+07	4.17869e+07	2.8334e+07	4.45986e+07
M159T112	159.011	112.5	1.9	516166	410269	503235	490095	532737	473662	413483	833413	308113	127222	120761	105026	98033	187398	102514	173430	814564	84055.7	526921	451997	217039	139222	330073	199778	339142	375784	391398	376721	469263	391039	391252
M159T36	158.96	35.7	0.6	6.18442e+07	9.47714e+07	8.66083e+07	1.01338e+08	2.30889e+07	8.38758e+07	2.05064e+07	1.08423e+08	9.56353e+07	1.48409e+07	1.23569e+08	5.09164e+07	6.1783e+07	9.57649e+07	1.60731e+07	7.44128e+06	1.79225e+07	9.1516e+07	1.74271e+07	2.14496e+07	4.74402e+07	1.13227e+08	2.10489e+07	7.51631e+07	6.86375e+07	6.79343e+07	2.87055e+07	7.3418e+07	7.31824e+07	6.85254e+07	7.32201e+07
M159T397	159.091	397.2	6.6	1.53454e+07	7.67378e+06	3.79929e+06	1.72381e+07	6.57277e+06	4.70217e+06	1.50894e+07	1.31255e+07	7.3547e+06	1.85786e+07	1.44256e+07	8.76788e+06	1.00196e+07	2.35498e+07	1.57566e+07	2.06849e+07	2.58903e+07	2.19755e+07	1.95625e+07	2.20561e+07	2.6488e+07	8.85081e+06	1.38649e+07	2.81843e+07	1.26357e+07	1.41473e+07	1.41554e+07	1.34673e+07	1.41267e+07	7.41847e+06	1.37547e+07
M159T403	158.96	403.4	6.7	705240	2.21944e+06	918572	682050	1.58794e+07	356780	7.74723e+06	1.25928e+06	1.49448e+07	1.22771e+07	1.0868e+07	3.47422e+07	3.10737e+07	2.82271e+06	1.0739e+07	7.44936e+06	1.77243e+07	3.4813e+07	4.00294e+07	9.66609e+06	671948	8.96957e+06	1.90989e+07	1.95451e+07	1.29567e+07	1.29645e+07	1.26118e+07	1.2614e+07	1.1999e+07	1.09459e+07	1.4922e+07
M159T596	159.116	595.5	9.9	646154	413993	863193	886692	644328	824621	1.14147e+06	525030	570251	755340	1.18144e+06	1.26243e+06	950391	835272	544966	1.19388e+06	422357	983094	790321	889791	471968	922615	775098	719222	623808	831757	778278	882150	771258	830034	774984
M159T672	159.081	672.4	11.2	395725	283478	186592	366351	513252	755501	388893	441657	446660	397199	253396	491921	160260	425188	382293	401331	501127	459234	449017	428904	341179	483140	220821	309503	427440	390337	416713	415588	418750	219392	374827
M159T727	159.117	727	12.1	931263	108127	799021	315719	509866	622344	412231	405036	440830	1.09778e+06	1.31835e+06	443176	670716	895132	913727	773583	428571	875076	843715	475385	500839	461396	740038	287056	766868	665236	734249	662561	698417	652019	654728
M159T760	159.157	760	12.7	1.59022e+07	1.4237e+07	1.98177e+07	9.28636e+06	6.83632e+06	2.08481e+07	2.23088e+07	2.03065e+07	1.02529e+07	2.88557e+07	1.63443e+07	1.16805e+07	3.07896e+07	1.73437e+07	2.25387e+07	1.98257e+07	1.57443e+07	1.116e+07	7.86481e+06	4.48349e+07	1.91953e+07	1.84969e+07	2.18419e+07	8.81474e+06	1.36082e+07	1.55509e+07	1.31575e+07	1.26495e+07	1.63676e+07	1.54373e+07	1.54058e+07
M159T80	158.964	79.5	1.3	1.34191e+08	9.6589e+07	1.12901e+08	1.40683e+08	1.78602e+08	1.46461e+08	5.05571e+07	1.09455e+08	1.09281e+08	1.05217e+08	1.07277e+08	6.33712e+07	4.78985e+07	9.20335e+07	8.81953e+07	9.25342e+07	1.25211e+08	8.40749e+07	2.06061e+08	1.32256e+08	1.36026e+08	6.57794e+07	1.16744e+08	1.24267e+08	8.13832e+07	8.76648e+07	8.7604e+07	8.64584e+07	8.76272e+07	8.76555e+07	8.92494e+07
M159T91	159.017	91	1.5	206069	498299	618618	243308	497613	468318	643493	124836	754802	796717	1.01734e+06	850415	1.07371e+06	723876	942777	1.0029e+06	1.14185e+06	1.40132e+06	1.49001e+06	1.57882e+06	1.13968e+06	875438	762025	974719	830777	823891	823688	823920	861210	824324	837872
M159T99	159.1	98.7	1.6	506057	1.58366e+06	1.2658e+06	1.65172e+06	425362	459119	1.41399e+06	462957	1.56887e+06	1.11292e+06	1.24201e+06	389771	1.64427e+06	1.17686e+06	1.28055e+06	1.37965e+06	442320	1.29946e+06	417753	1.51933e+06	1.28415e+06	412276	1.3201e+06	1.31915e+06	1.34883e+06	1.38975e+06	1.72139e+06	1.38917e+06	1.31588e+06	1.22483e+06	1.38797e+06
M160T100	160.06	99.8	1.7	810153	572062	727550	830804	817031	789133	745307	854800	780516	606770	779597	730737	716441	969381	269566	964960	673561	1.05298e+06	275870	859699	874297	853085	827556	780949	669657	807470	777962	805379	807933	922407	651212
M160T103	160.097	103	1.7	1.84559e+07	1.56612e+07	1.86007e+07	1.75323e+07	1.49101e+07	1.2336e+07	2.01606e+07	1.67559e+07	1.85026e+07	2.35846e+07	2.16789e+07	2.52748e+07	1.67145e+07	2.41011e+07	2.25725e+07	2.657e+07	2.08279e+07	1.82535e+07	1.80823e+07	2.36356e+07	1.68152e+07	1.9045e+07	1.72704e+07	2.23279e+07	2.05228e+07	1.85123e+07	2.05662e+07	1.97625e+07	2.18356e+07	2.0503e+07	1.98542e+07
M160T112	160.097	111.7	1.9	8.5507e+06	5.69863e+06	5.68581e+06	1.16063e+07	1.11623e+07	1.28253e+07	5.30559e+06	1.28275e+06	5.33363e+06	7.76188e+06	4.79346e+06	5.67801e+06	5.02468e+06	6.1488e+06	7.7609e+06	5.21445e+06	6.16033e+06	6.11479e+06	7.72114e+06	1.33146e+06	5.99584e+06	5.64552e+06	5.27218e+06	4.12383e+06	5.41531e+06	5.89693e+06	5.67306e+06	5.43085e+06	7.70834e+06	5.43325e+06	5.40151e+06
M160T119	160.133	118.8	2	1.65609e+08	9.1882e+08	2.44175e+08	2.36775e+08	1.83043e+08	1.69856e+08	7.96885e+08	1.47678e+08	2.53565e+09	2.5657e+09	1.99394e+09	2.31757e+09	2.60794e+09	1.9828e+09	3.00499e+09	3.1842e+09	9.51823e+08	2.4689e+09	1.6585e+09	1.32728e+08	2.35778e+08	1.49771e+09	1.91524e+09	1.9102e+09	1.64941e+09	1.43236e+09	1.49263e+09	1.64408e+09	1.42554e+09	1.42951e+09	1.27049e+09
M160T136	159.968	136	2.3	7.70977e+06	5.22406e+06	5.44693e+06	9.30291e+06	8.23499e+06	8.2864e+06	6.88907e+06	5.96068e+06	7.86183e+06	7.90247e+06	6.17818e+06	5.1465e+06	6.29617e+06	6.70184e+06	6.37561e+06	5.69557e+06	6.06952e+06	6.66259e+06	7.92085e+06	7.53438e+06	6.6864e+06	8.03115e+06	5.4454e+06	5.28195e+06	5.96368e+06	6.2619e+06	6.26021e+06	6.07933e+06	6.53871e+06	6.51677e+06	6.08318e+06
M160T32	159.97	31.9	0.5	2.95856e+07	2.95167e+07	3.62386e+07	1.81606e+07	5.39073e+07	5.75352e+07	6.32456e+07	4.14579e+07	1.28388e+07	1.50609e+07	4.48381e+07	4.27854e+07	1.54562e+07	1.54055e+07	1.86561e+07	1.45308e+07	5.89379e+07	1.50208e+07	4.38975e+07	6.23107e+07	3.93687e+07	3.03736e+07	3.35408e+07	3.66267e+07	2.28466e+07	1.67608e+07	1.90886e+07	1.68092e+07	1.69539e+07	2.41383e+07	1.70453e+07
M160T397_1	160.076	397.2	6.6	1.51741e+06	1.12874e+06	2.19379e+06	808725	741826	468636	113211	1.72073e+06	1.2243e+06	4.39382e+06	764029	624706	1.48325e+06	1.93858e+06	988993	1.24737e+06	86761.5	1.44237e+06	1.21119e+06	469565	417970	1.35879e+06	1.25899e+06	2.49935e+06	1.75871e+06	1.85012e+06	1.76551e+06	2.27059e+06	1.77167e+06	2.24738e+06	1.14795e+06
M160T397_2	160.095	397	6.6	284468	266693	369857	1.01843e+06	174817	52803.5	315669	217629	1.0494e+06	3.73032e+06	3.72252e+06	2.01997e+06	2.36109e+06	2.51824e+06	2.8163e+06	3.69899e+06	1.67327e+06	6.13698e+06	4.25796e+06	1.467e+06	1.76689e+06	530873	1.28751e+06	3.67177e+06	1.48111e+06	1.40695e+06	1.26795e+06	1.48226e+06	718204	1.48606e+06	1.54692e+06
M160T486	160.097	485.7	8.1	1.54377e+06	1.03701e+06	1.54536e+06	1.46717e+06	1.37644e+06	894226	995854	1.02933e+06	1.5537e+06	510692	1.01304e+06	878532	1.41829e+06	1.00794e+06	1.51502e+06	979574	1.71597e+06	1.6978e+06	564728	1.5047e+06	1.10322e+06	1.57934e+06	1.17188e+06	1.25641e+06	1.30578e+06	1.4828e+06	1.26972e+06	1.18496e+06	1.3595e+06	1.31677e+06	1.36065e+06
M160T69	159.97	68.8	1.1	2.72542e+07	2.89237e+07	2.56923e+07	2.69241e+07	2.28639e+07	2.83542e+07	3.08581e+07	3.56343e+07	1.77172e+07	1.87236e+07	1.89758e+07	2.00896e+07	1.85666e+07	1.94086e+07	1.90497e+07	1.86283e+07	1.81392e+07	2.00366e+07	1.84843e+07	2.02824e+07	2.08575e+07	1.97998e+07	1.77985e+07	2.3056e+07	2.34705e+07	2.34658e+07	2.34678e+07	2.34713e+07	2.38901e+07	2.53703e+07	2.34708e+07
M160T87	160.097	87.4	1.5	1.47281e+06	2.9372e+06	2.24439e+06	1.30943e+06	2.83459e+06	2.27767e+06	3.32118e+06	1.85481e+06	3.91316e+06	3.4581e+06	3.8937e+06	4.24461e+06	1.91139e+06	5.44036e+06	3.42379e+06	3.55539e+06	4.13486e+06	3.35668e+06	4.01186e+06	3.96962e+06	3.84082e+06	4.09505e+06	3.55616e+06	3.75777e+06	3.34254e+06	3.19212e+06	3.18262e+06	3.17909e+06	3.23107e+06	3.20771e+06	3.92102e+06
M161T111	161.1	111.3	1.9	273081	423636	331159	110923	276251	209041	277175	226573	254269	421257	306277	548248	1.15052e+06	468332	2.18029e+06	2.02065e+06	423963	717070	1.18997e+06	214649	317462	272137	293748	469961	457851	458086	423294	458143	506424	510271	469514
M161T119	161.137	118.8	2	1.2958e+08	1.06974e+08	1.59273e+08	1.61988e+08	1.26953e+08	1.31297e+08	1.74319e+08	1.4409e+08	2.04721e+08	1.51745e+08	2.50493e+08	1.92223e+08	6.15713e+07	1.72912e+08	1.39379e+08	1.37344e+08	1.63685e+08	7.52725e+07	1.25125e+08	7.39587e+07	8.86843e+07	1.36098e+08	1.36616e+08	1.86321e+08	1.2255e+08	1.29699e+08	1.26323e+08	1.25889e+08	1.26164e+08	1.19385e+08	1.22288e+08
M161T127	161.003	127.4	2.1	3.25043e+06	2.4381e+06	3.35534e+06	3.57614e+06	2.66901e+06	6.09349e+06	792559	2.26743e+06	9.26999e+06	1.00022e+07	9.83527e+06	6.39859e+06	1.32073e+07	5.74786e+06	1.07925e+07	1.02699e+07	9.24669e+06	1.32869e+07	1.20863e+07	6.42182e+06	8.87201e+06	1.03342e+07	1.29143e+07	6.89821e+06	7.10243e+06	7.25096e+06	7.41157e+06	7.6055e+06	7.10505e+06	6.55447e+06	7.2392e+06
M161T34	161.002	33.6	0.6	1.70238e+07	1.63137e+07	1.76492e+07	1.99003e+07	1.58158e+07	1.64626e+07	1.78517e+07	1.59501e+07	1.74676e+07	1.66885e+07	1.53965e+07	1.38478e+07	1.94289e+07	1.8584e+07	1.50455e+07	1.41086e+07	1.36287e+07	1.8257e+07	1.57423e+07	1.56378e+07	1.46961e+07	1.49759e+07	1.38286e+07	1.69152e+07	1.65909e+07	1.69376e+07	1.71446e+07	1.71957e+07	1.71627e+07	1.57162e+07	1.69409e+07
M161T352	161.004	351.7	5.9	1.26129e+07	1.27877e+07	4.68115e+06	5.15667e+06	1.38757e+07	2.66885e+06	1.07607e+07	1.21953e+07	4.34802e+06	1.51154e+07	4.56617e+06	1.48281e+07	4.47616e+06	1.4939e+07	2.26787e+06	3.9672e+06	1.1389e+07	1.33954e+07	4.38652e+06	5.22396e+06	1.05337e+07	5.91944e+06	1.07313e+07	3.70978e+06	6.13234e+06	6.68842e+06	8.00231e+06	6.26445e+06	7.42336e+06	5.45614e+06	6.12635e+06
M161T356	160.538	356.4	5.9	1.15937e+06	483808	2.51655e+06	2.78834e+06	156721	9619.6	4.53623e+06	2.25919e+06	39162.9	2.95446e+06	146660	251219	5.85108e+06	4.42841e+06	1.48334e+06	1.36132e+06	51888.7	5.46772e+06	386170	229012	13791.2	44132	860552	55053.3	1.39678e+06	1.39522e+06	1.39284e+06	1.45118e+06	1.50848e+06	1.36794e+06	1.83179e+06
M161T384	161.002	383.5	6.4	1.2642e+07	8.4752e+06	9.91643e+06	4.46163e+06	1.52347e+07	4.8969e+06	1.08406e+07	1.13715e+07	1.28135e+06	5.83044e+06	1.18799e+07	7.54829e+06	5.3454e+06	1.43854e+06	1.44902e+07	8.86302e+06	4.75449e+06	1.12683e+09	4.53724e+06	7.87173e+06	5.37731e+06	7.6135e+06	4.27935e+06	3.58706e+07	9.37627e+06	9.59229e+06	9.37769e+06	1.05511e+07	9.37656e+06	9.55763e+06	9.38696e+06
M161T404	161.002	404.1	6.7	8.22993e+06	5.08577e+06	3.00499e+06	8.43161e+06	4.01677e+06	2.26151e+06	3.80139e+06	6.64408e+06	8.39383e+06	7.47115e+06	6.21106e+06	8.74229e+06	1.96949e+06	8.26556e+06	7.87405e+06	1.15059e+07	9.52863e+06	9.55326e+06	5.98365e+06	8.85632e+06	8.03584e+06	3.87464e+06	4.47851e+06	3.55637e+06	5.10302e+06	4.4018e+06	5.11077e+06	3.79849e+06	4.66115e+06	5.52536e+06	4.93534e+06
M161T428	161.107	427.8	7.1	3.03427e+06	4.97315e+06	5.09521e+06	2.66967e+06	1.30841e+06	3.10981e+06	8.36759e+06	1.1811e+06	2.37763e+06	4.34219e+06	5.68299e+06	2.22225e+06	2.87534e+06	1.85938e+06	1.83944e+06	517240	1.26913e+06	894552	1.14474e+06	854054	4.43822e+06	1.84546e+06	1.90523e+06	1.09126e+06	2.5355e+06	2.24305e+06	2.53607e+06	1.92272e+06	3.50482e+06	2.02785e+06	1.82987e+06
M161T433	161.071	432.6	7.2	152911	254986	179699	298141	243416	162698	151989	229576	281005	237090	144383	100944	134988	54593.9	197112	227200	176702	109401	175031	138039	160482	148820	161692	158651	136799	145820	137157	64964.7	145725	155277	146937
M161T463	161.136	463.4	7.7	184205	238881	153587	359334	170620	124565	180274	200572	275408	383209	356042	185563	213688	320549	277059	244382	256773	357972	219012	318962	289066	240162	181435	389884	297147	274533	283651	282265	283690	266769	283666
M161T63	161.002	63	1	9.58918e+06	1.39884e+07	1.9182e+07	1.49057e+07	1.17366e+07	2.84296e+07	1.142e+07	3.68938e+07	8.20892e+06	1.69574e+07	1.36876e+07	6.10486e+06	2.73245e+07	2.68702e+07	3.12471e+07	6.61717e+06	7.88972e+06	1.22979e+07	1.50884e+07	9.39353e+06	2.3319e+07	4.46861e+06	1.93842e+07	8.74098e+06	2.18443e+07	2.18873e+07	1.58436e+07	1.54467e+07	1.94657e+07	1.57184e+07	2.60161e+07
M161T665	161.096	664.8	11.1	987079	452183	961454	1.45854e+06	822583	372751	786575	609197	1.31198e+06	1.02221e+06	1.11588e+06	938941	989425	1.72461e+06	1.24216e+06	1.26094e+06	1.07353e+06	975720	1.42525e+06	1.05658e+06	861062	807764	570904	1.71867e+06	1.04607e+06	1.04604e+06	995874	1.04568e+06	1.1152e+06	915669	1.01679e+06
M161T72	161.03	71.8	1.2	4.24392e+06	3.18194e+06	1.25283e+06	1.77202e+06	3.11837e+06	1.81446e+06	7.76222e+06	3.83171e+06	5.14788e+06	3.35537e+06	5.78111e+06	6.92177e+06	1.77264e+06	3.41493e+06	1.29515e+06	1.1892e+06	2.31261e+06	3.77716e+06	5.2878e+06	2.00686e+06	8.38031e+06	4.82959e+06	854605	1.1671e+06	1.58485e+06	2.93963e+06	2.94361e+06	2.9439e+06	3.12705e+06	3.33204e+06	3.12066e+06
M161T742	161.096	742.2	12.4	1.48299e+06	4.44518e+06	3.42158e+06	1.57043e+06	2.05521e+06	1.09812e+06	1.78721e+06	2.20968e+06	1.45978e+06	4.00823e+06	2.11327e+06	2.92536e+06	1.37885e+06	2.67275e+06	1.82358e+06	4.36727e+06	2.08057e+06	1.90603e+06	2.29133e+06	6.90272e+06	3.2633e+06	3.49343e+06	1.80509e+06	2.08418e+06	2.24218e+06	2.55275e+06	2.40246e+06	2.02987e+06	2.39589e+06	3.16171e+06	2.16379e+06
M161T768	161.096	767.6	12.8	5.68577e+06	8.37884e+06	8.08046e+06	4.80505e+06	1.00237e+07	2.73688e+06	6.17108e+06	1.00929e+07	5.21594e+06	4.64065e+06	5.10214e+06	3.32208e+06	6.13556e+06	9.33505e+06	5.41341e+06	5.55265e+06	5.23346e+06	4.69127e+06	5.92146e+06	4.72109e+06	2.03222e+06	2.78257e+06	3.71118e+06	1.98601e+06	3.65643e+06	4.1261e+06	3.45421e+06	4.67043e+06	5.08743e+06	3.70412e+06	4.19825e+06
M161T77	161.128	77.1	1.3	8.89587e+06	3.68438e+06	4.57719e+06	7.15623e+06	9.81264e+06	2.63269e+06	5.98138e+06	7.6819e+06	9.91666e+06	4.61114e+06	9.6962e+06	1.12185e+07	5.35615e+06	1.46736e+07	8.50299e+06	2.63944e+06	9.38246e+06	1.29601e+07	1.01706e+07	1.09879e+07	4.14137e+06	1.18937e+07	9.52519e+06	1.37556e+07	5.27488e+06	7.68013e+06	7.66499e+06	7.14665e+06	6.21129e+06	7.6354e+06	7.61525e+06
M161T82	160.92	82.1	1.4	1.89074e+06	1.73666e+06	1.78851e+06	2.14506e+06	1.37922e+06	1.47829e+06	1.83867e+06	2.31886e+06	1.94644e+06	1.78905e+06	1.77868e+06	1.78442e+06	1.20186e+06	2.09574e+06	1.68904e+06	1.72173e+06	1.10346e+06	1.37954e+06	1.17625e+06	1.47608e+06	1.35175e+06	1.55735e+06	1.14476e+06	1.86655e+06	1.62755e+06	1.62765e+06	1.65323e+06	1.61863e+06	1.63684e+06	1.70514e+06	1.62752e+06
M161T83	161.128	82.7	1.4	3.92091e+06	3.22601e+06	2.99719e+06	2.88232e+06	4.19822e+06	2.75605e+06	3.89832e+06	3.73082e+06	945788	3.44143e+06	4.08461e+06	4.33993e+06	2.92061e+06	3.30062e+06	2.79256e+06	2.63307e+06	2.86795e+06	2.75109e+06	2.94659e+06	3.36207e+06	3.36168e+06	3.70882e+06	2.5222e+06	2.85992e+06	3.06272e+06	3.13285e+06	3.06238e+06	2.99847e+06	2.70625e+06	2.99986e+06	3.0067e+06
M161T98	161.092	97.7	1.6	439723	5.13851e+06	979592	358094	3.77833e+06	1.05223e+06	5.67823e+06	4.72763e+06	8.28627e+06	8.70798e+06	6.19325e+06	7.74362e+06	1.0661e+06	8.61115e+06	7.45299e+06	7.4478e+06	5.76252e+06	1.00017e+07	5.36095e+06	4.02866e+06	6.37475e+06	8.46612e+06	1.0517e+07	9.66925e+06	5.86492e+06	5.54149e+06	1.71569e+06	5.89184e+06	5.87555e+06	5.87233e+06	5.89341e+06
M162T114	162.113	114.3	1.9	6.09511e+07	3.8375e+07	4.87943e+07	5.62946e+07	3.34925e+07	1.8003e+07	5.82525e+07	4.23536e+07	5.48898e+07	6.20476e+07	5.46153e+07	4.47594e+07	4.64073e+07	5.55267e+07	5.83269e+07	5.6796e+07	7.32729e+07	8.45286e+07	6.6079e+07	7.07869e+07	6.234e+07	5.61244e+07	3.94975e+07	9.94354e+07	5.46773e+07	5.41294e+07	5.41221e+07	5.07659e+07	5.32548e+07	4.60966e+07	5.41246e+07
M162T119	162.137	118.7	2	6.78736e+06	8525.48	115443	6.69645e+06	8.4809e+06	7.70867e+06	197351	149273	7.44827e+06	7.23842e+06	203106	212677	120045	195750	195471	187155	143797	157100	4.03328e+06	8072.72	11899.8	5.1527e+06	138251	26651.2	3.00164e+06	3.10332e+06	3.17687e+06	3.17826e+06	3.1031e+06	3.48523e+06	3.09866e+06
M162T120	162.076	119.6	2	1.53409e+07	2.87779e+07	6.29976e+06	4.92522e+07	1.40047e+07	6.85571e+06	4.17018e+07	2.359e+07	6.24122e+06	1.18045e+07	2.28735e+07	2.65322e+07	2.54731e+07	1.52787e+07	2.48562e+07	1.32855e+07	1.62591e+07	1.12161e+07	1.09417e+07	2.34795e+07	1.52434e+07	2.95482e+07	1.95679e+07	2.50009e+07	1.26854e+07	1.22119e+07	1.25356e+07	1.53475e+07	1.3059e+07	1.57449e+07	1.25872e+07
M162T129	162.113	129	2.1	1.91715e+07	1.57724e+07	1.63089e+07	2.05078e+07	2.00909e+07	1.8709e+07	1.77232e+07	2.05195e+07	1.6285e+07	1.65275e+07	2.162e+07	1.93648e+07	2.01402e+07	1.64617e+07	2.24974e+07	2.04392e+07	2.17448e+07	2.78172e+07	2.48744e+07	2.1413e+07	1.85983e+07	2.26373e+07	1.69664e+07	2.15353e+07	1.68802e+07	1.80636e+07	1.89914e+07	1.83654e+07	1.88427e+07	2.03977e+07	1.88415e+07
M162T290	162.076	289.6	4.8	2.819e+06	2.32527e+06	706738	714503	2.73321e+06	1.9026e+06	673770	915442	2.18006e+06	1.26407e+06	3.36774e+06	3.4968e+06	4.01383e+06	1.11574e+06	4.43094e+06	1.11962e+06	701521	1.75103e+06	705239	1.83804e+06	2.4023e+06	2.64735e+06	748176	668876	1.66008e+06	1.20155e+06	1.23996e+06	2.28703e+06	1.22934e+06	1.5397e+06	1.30933e+06
M162T34	162.001	34.3	0.6	2.63283e+07	1.73429e+07	2.46662e+07	2.00608e+07	1.7194e+07	1.60067e+07	2.7047e+07	2.39269e+07	1.5967e+07	1.2972e+07	1.96298e+07	1.28307e+07	5.19762e+06	1.70055e+07	1.02741e+07	9.84721e+06	1.89024e+07	8.97824e+06	1.29563e+07	1.28805e+07	1.8084e+07	1.48008e+07	1.26449e+07	1.88868e+07	1.6068e+07	1.64692e+07	1.63639e+07	1.69225e+07	1.68605e+07	1.60647e+07	1.64683e+07
M162T364	162.004	364.1	6.1	6.12009e+06	3.4048e+06	4.83782e+06	1.5058e+06	7.35742e+06	4.86176e+06	9.23878e+06	4.94276e+06	5.61406e+06	1.38554e+06	7.33869e+06	1.62628e+06	1.29525e+06	826835	1.00795e+06	963291	1.74079e+06	1.33274e+06	956517	2.73392e+06	2.82554e+06	4.96691e+06	322400	2.1491e+06	3.26205e+06	2.75084e+06	3.25818e+06	3.25267e+06	3.4452e+06	3.24166e+06	3.1809e+06
M162T367	162.066	366.6	6.1	1.50914e+06	699529	1.54038e+06	1.24031e+06	1.44582e+06	1.63983e+06	2.14273e+06	1.59259e+06	130517	263899	856980	243289	96185.2	1.22295e+06	690540	421127	1.77851e+06	108899	1.12917e+06	2.10303e+06	2.00339e+06	177057	37333.8	904725	856274	948444	867594	937349	966638	976742	352599
M162T597	162.091	597	9.9	749470	935677	244133	300334	735645	419317	288463	404139	397306	428924	1.00144e+06	1.31435e+06	734326	191543	946673	541872	292590	561227	286702	343451	837422	278523	317705	331974	469757	390684	395769	433826	522373	519173	546218
M162T64	162.001	64	1.1	5.75614e+06	1.94135e+07	7.03526e+06	6.27146e+06	6.55642e+06	5.41897e+06	3.48363e+07	1.35257e+07	1.00538e+07	2.53715e+07	4.17407e+07	2.24904e+06	1.00809e+07	2.25525e+07	2.0412e+07	7.47781e+06	2.53519e+07	1.04242e+07	7.82683e+06	7.23152e+06	1.56019e+07	8.75814e+06	8.07071e+06	1.22852e+07	1.20934e+07	1.93534e+07	1.96993e+07	1.92669e+07	1.72936e+07	1.628e+07	2.48821e+07
M162T654	162.091	653.9	10.9	742139	365654	1.03801e+06	299710	842223	623739	433985	375227	885047	715689	694524	952487	335243	593645	1.14469e+06	380626	273047	223695	738432	342522	580726	834686	653597	376154	440235	438748	563770	438863	409690	596896	473802
M162T73	162.453	73.3	1.2	125055	134133	133299	141283	220285	202432	168812	148650	194142	117051	138202	186517	145375	141939	145533	127252	113342	127091	133400	127673	120886	130144	122522	104400	138957	138845	138502	139088	142331	155339	147316
M162T90_1	161.991	89.5	1.5	2.00983e+06	855681	1.67497e+06	4.16308e+06	3.1564e+06	1.03981e+06	2.51348e+06	150495	914965	94597.5	203850	100780	146256	108397	57280.7	74549.4	2.17207e+06	182406	1.74743e+06	2.8196e+06	1.63742e+06	98469.7	681489	157289	1.51627e+06	1.51711e+06	1.51756e+06	1.48932e+06	1.577e+06	1.52318e+06	1.5481e+06
M162T90_2	162.113	89.5	1.5	3.5073e+09	9.76656e+08	2.50824e+09	4.00261e+09	3.23844e+09	3.76704e+09	3.25195e+09	3.34152e+09	3.79893e+09	2.63083e+09	3.30556e+09	3.00955e+09	2.21476e+09	3.29316e+09	3.26734e+09	3.09145e+09	3.22455e+09	1.9061e+09	2.09201e+09	2.70117e+09	3.17769e+09	2.60889e+09	2.19005e+09	3.69488e+09	3.51603e+09	3.52123e+09	2.73302e+09	3.22997e+09	3.23895e+09	3.65062e+09	3.69273e+09
M163T114	163.115	114.1	1.9	8.2785e+06	9.42288e+06	8.98453e+06	9.08116e+06	9.17376e+06	9.09808e+06	9.44904e+06	9.37765e+06	9.08806e+06	8.88103e+06	8.33697e+06	8.55533e+06	8.86447e+06	8.57585e+06	9.41476e+06	9.39914e+06	9.39522e+06	1.04253e+07	9.53868e+06	9.25475e+06	9.94362e+06	9.67911e+06	8.6909e+06	8.38666e+06	9.0613e+06	8.893e+06	8.98288e+06	9.06432e+06	9.89473e+06	8.88752e+06	9.04491e+06
M163T127	162.998	126.8	2.1	3.33027e+07	1.35894e+07	4.39716e+07	1.01078e+07	5.05114e+07	4.63851e+07	5.06346e+07	3.18886e+07	1.19859e+08	1.20713e+08	1.27488e+08	1.26952e+08	1.19097e+08	1.05951e+08	1.10908e+08	9.55333e+07	5.67952e+07	1.2416e+08	4.32641e+07	4.613e+07	5.54066e+07	1.19433e+08	1.22901e+08	1.08417e+08	7.52751e+07	7.36737e+07	7.51191e+07	7.36532e+07	7.69944e+07	7.51353e+07	6.37623e+07
M163T161	162.996	161.1	2.7	1.14987e+08	8.79713e+07	1.23458e+08	7.68287e+07	1.61696e+08	1.47768e+07	1.63237e+08	2.07425e+08	1.80061e+07	6.15661e+07	6.63944e+07	2.69569e+07	1.08341e+07	1.06975e+08	5.19105e+07	1.63203e+07	1.49883e+08	3.02395e+06	1.58853e+08	1.08828e+08	1.71814e+08	7.18588e+07	4.23705e+07	6.59173e+07	7.46713e+07	7.43187e+07	7.91489e+07	7.91465e+07	3.45909e+07	7.92101e+07	7.99293e+07
M163T195	162.996	194.8	3.2	2.0122e+07	1.09734e+08	2.66624e+07	5.19771e+07	1.02627e+08	2.33426e+07	2.80238e+07	2.69663e+07	1.23706e+08	1.33837e+08	8.13063e+07	1.28148e+08	1.38331e+08	1.37467e+08	1.19789e+08	8.66538e+07	1.10035e+08	1.36785e+08	1.30182e+08	9.42959e+07	3.33511e+07	2.64802e+07	3.54979e+07	3.08264e+07	8.15214e+07	3.96361e+07	8.05719e+07	8.27022e+07	7.98227e+07	7.13054e+07	4.46389e+07
M163T212	162.996	211.8	3.5	3.89649e+06	2.14821e+07	2.64427e+06	5.29381e+06	2.24013e+06	2.16621e+06	2.1213e+06	2.03879e+06	1.39915e+08	1.76348e+08	1.26065e+08	1.59574e+08	1.00406e+08	1.13053e+08	1.34797e+08	1.02933e+08	6.97589e+06	1.11296e+08	3.42281e+06	2.42428e+06	2.31519e+06	1.02182e+08	1.08781e+08	9.12924e+07	5.77231e+07	5.77678e+07	4.72346e+07	6.82845e+07	6.24673e+07	5.93727e+07	5.76707e+07
M163T230	162.996	229.8	3.8	7.08553e+07	5.0522e+07	4.50766e+07	8.45824e+07	3.52552e+07	4.20043e+07	5.53223e+07	7.60444e+07	6.75746e+07	1.67602e+08	1.03845e+08	9.68415e+07	1.02721e+08	1.22389e+08	8.64796e+07	1.34544e+08	1.26063e+08	9.84728e+07	1.43901e+08	1.15294e+08	3.36152e+07	1.15595e+08	7.40435e+07	1.35538e+08	8.03021e+07	8.92838e+07	1.06711e+08	8.8861e+07	6.58808e+07	9.257e+07	8.4274e+07
M163T250	162.998	250.4	4.2	3.33125e+07	4.22148e+07	3.72382e+07	4.23883e+07	3.9218e+07	5.97786e+07	3.88617e+07	3.32838e+07	1.44003e+07	1.87868e+07	1.37014e+07	2.18561e+07	1.5045e+07	2.6057e+07	2.52329e+07	3.06398e+07	3.05864e+07	2.19369e+07	4.56417e+07	3.30559e+07	4.24774e+07	2.08522e+07	2.1464e+07	1.26287e+07	2.73134e+07	3.20221e+07	3.20523e+07	3.3322e+07	3.3195e+07	3.27832e+07	3.32093e+07
M163T265	162.996	264.7	4.4	1.66077e+07	5.82384e+07	4.7814e+07	1.88888e+07	6.58459e+07	5.78183e+07	9.61979e+07	8.51863e+07	4.77689e+07	5.86994e+07	5.12875e+07	4.9839e+07	1.11842e+08	5.17347e+07	4.05969e+07	4.19191e+07	4.92443e+07	1.22601e+08	4.77444e+07	4.86917e+07	5.46131e+07	4.60365e+07	4.48148e+07	1.23567e+08	4.49769e+07	2.24678e+07	4.33406e+07	4.42938e+07	4.38555e+07	5.24367e+07	4.15927e+07
M163T280	163.026	279.7	4.7	1.51144e+06	4.42531e+06	537480	2.39912e+06	1.89223e+06	1.72231e+06	1.43078e+06	2.12378e+06	3.06647e+06	3.68245e+06	3.91024e+06	5.06204e+06	5.42373e+06	4.10757e+06	7.36949e+06	5.26483e+06	2.64844e+06	4.54627e+06	3.15049e+06	2.1301e+06	2.37354e+06	3.4818e+06	3.37445e+06	3.96493e+06	2.32431e+06	2.52037e+06	796527	2.33878e+06	2.50961e+06	2.51234e+06	2.51426e+06
M163T300	163.001	299.9	5	4.20576e+07	3.23852e+07	5.88102e+07	3.8143e+07	4.99569e+07	3.85484e+07	4.64679e+07	4.65196e+07	5.72062e+07	5.94212e+07	9.19619e+07	4.99015e+07	1.37665e+08	6.2452e+07	8.90708e+07	1.3114e+08	5.03963e+07	1.7203e+08	1.34609e+08	1.05955e+08	1.10073e+08	7.41284e+07	6.37952e+07	5.28516e+07	6.8159e+07	6.69188e+07	6.80656e+07	6.68948e+07	6.03075e+07	6.81454e+07	7.15018e+07
M163T325	162.996	325.1	5.4	3.42657e+07	5.78401e+07	2.88761e+07	2.28233e+07	8.9665e+07	1.73309e+08	1.0333e+08	1.55514e+08	1.45005e+08	3.4451e+07	5.53371e+07	2.49286e+08	5.45331e+07	5.83832e+07	1.21968e+08	3.46343e+07	5.77102e+07	1.70858e+08	5.22994e+07	1.22757e+08	2.40283e+08	5.09723e+07	1.55116e+08	6.40481e+07	1.00992e+08	1.0155e+08	1.0164e+08	1.01379e+08	8.24112e+07	1.03402e+08	6.12042e+07
M163T33	163	32.8	0.5	1.40687e+08	1.33174e+08	1.44295e+08	1.88404e+08	1.1667e+08	1.38536e+08	1.56309e+08	1.41828e+08	1.78311e+08	9.8956e+07	1.53102e+08	1.81035e+08	1.30291e+08	2.04904e+08	2.26868e+08	1.44848e+08	1.62074e+08	1.90297e+08	1.54995e+08	1.06846e+08	1.65785e+08	1.31103e+08	2.11753e+08	1.11093e+08	1.44809e+08	1.69076e+08	1.45091e+08	9.66867e+07	1.52198e+08	1.51952e+08	1.51831e+08
M163T348	163.001	347.9	5.8	4.37051e+07	3.39923e+07	6.19986e+07	4.84481e+07	5.31712e+07	2.4931e+07	7.11132e+07	4.74397e+07	8.03146e+07	8.02775e+07	7.84598e+07	9.7151e+07	7.01425e+07	8.01421e+07	1.04347e+08	1.00721e+08	5.48621e+07	9.65309e+07	6.76149e+07	6.21421e+07	4.39029e+07	5.12182e+07	5.97753e+07	5.64061e+07	6.10237e+07	6.90945e+07	6.90875e+07	6.90502e+07	6.92143e+07	6.89389e+07	6.57817e+07
M163T404	162.996	404.3	6.7	7.81272e+07	6.65272e+07	5.43558e+07	5.5519e+07	1.08487e+08	1.04906e+08	3.18819e+07	1.36786e+07	8.99057e+07	4.3858e+07	7.19563e+07	4.68258e+07	5.30685e+07	7.57569e+07	8.57495e+07	4.71426e+07	6.52476e+07	1.23202e+07	6.47219e+07	7.34331e+07	5.4019e+07	1.80141e+07	7.64061e+07	9.05706e+07	4.6348e+07	4.99159e+07	3.35429e+07	5.06488e+07	6.23737e+07	3.50689e+07	2.95937e+07
M163T448	163.09	447.9	7.5	214739	171572	196420	248974	292642	238161	193042	235198	414098	291453	417705	219007	219720	301768	282440	289186	236153	297962	254869	357077	265361	373211	365685	253378	203730	223521	229898	252514	179577	219751	229093
M163T449	162.996	448.9	7.5	1.51612e+07	2.60936e+07	5.43313e+07	3.79094e+07	3.00341e+07	2.36005e+07	7.03082e+07	6.45367e+07	7.94814e+07	2.75268e+07	8.0349e+07	1.47147e+07	2.66262e+07	5.2703e+07	1.30292e+07	1.38457e+07	1.33083e+07	1.41439e+08	2.12423e+07	3.35046e+07	6.35874e+07	1.71911e+07	1.26913e+07	6.88849e+07	2.46091e+07	2.47743e+07	2.49165e+07	4.07267e+07	3.04987e+07	2.43708e+07	2.51285e+07
M163T472	163	471.9	7.9	1.65357e+07	1.23566e+07	1.27704e+07	1.23336e+07	1.95442e+07	1.80219e+07	1.32451e+07	1.42311e+07	2.06997e+07	2.65582e+07	1.33616e+07	2.18452e+07	5.79422e+06	3.6973e+06	2.01295e+06	1.29313e+07	1.73838e+07	2.65994e+07	2.48362e+07	2.14939e+07	2.01777e+06	5.89357e+06	2.71041e+07	3.97338e+06	1.87297e+07	1.89389e+07	1.8914e+07	2.03353e+07	2.0424e+07	1.84575e+07	2.03357e+07
M163T503	163.001	503.1	8.4	5.23678e+07	4.52976e+07	1.82417e+07	4.34846e+07	1.35312e+07	6.29245e+06	4.3647e+07	2.72982e+07	2.31019e+07	6.58866e+07	5.97634e+07	1.85775e+07	2.03165e+07	4.03242e+07	3.00166e+07	3.34966e+07	6.98794e+07	3.57913e+07	6.39791e+07	7.07139e+07	7.03368e+07	3.13658e+07	1.80954e+07	7.2525e+07	3.04901e+07	3.34675e+07	1.56355e+07	3.33849e+07	3.33497e+07	3.49571e+07	3.03838e+07
M163T517	162.996	517.1	8.6	1.58307e+07	1.895e+07	1.34854e+07	9.80737e+06	8.29552e+06	9.58125e+06	1.0547e+07	1.25827e+07	1.61745e+07	3.70399e+07	2.59241e+07	5.88089e+07	7.47938e+07	5.85687e+07	4.71719e+07	2.56206e+07	6.03262e+06	1.47433e+07	1.21574e+07	1.0292e+07	5.68659e+06	9.17962e+06	1.36739e+07	3.96156e+06	2.22056e+07	2.12809e+07	2.21999e+07	2.35323e+07	1.98039e+07	2.22123e+07	1.57748e+07
M163T539	162.996	538.8	9	2.99216e+07	2.32656e+07	1.87412e+07	2.42621e+07	3.58219e+07	3.04366e+07	2.233e+07	2.395e+07	4.40516e+07	1.8652e+07	3.54266e+07	5.59724e+07	2.1843e+07	2.50807e+07	1.89032e+07	3.13264e+07	1.75057e+07	2.87036e+07	2.18644e+07	2.40687e+07	2.10158e+07	3.17466e+07	2.48963e+07	2.29481e+07	2.28482e+07	2.64505e+07	2.65666e+07	3.1723e+07	1.75839e+07	2.82522e+07	2.90096e+07
M163T573_1	163.146	573.2	9.6	2.33164e+06	732157	2.06611e+06	1.69818e+06	3.35933e+06	507388	792155	820317	4.1068e+06	1.95079e+06	1.89986e+06	4.77375e+06	4.65637e+06	828995	2.1596e+06	3.80958e+06	2.3992e+06	5.61237e+06	5.02717e+06	2.35924e+06	817782	2.67772e+06	3.32114e+06	4.07155e+06	2.96433e+06	2.43638e+06	2.62853e+06	2.53565e+06	2.27967e+06	2.41178e+06	2.01984e+06
M163T573_2	163.48	573.2	9.6	987237	271933	1.70437e+06	1.16749e+06	1.55267e+06	497431	1.34567e+06	777621	1.03317e+06	1.24032e+06	968964	2.24095e+06	1.40059e+06	417534	1.23938e+06	1.02088e+06	811228	1.95646e+06	2.61179e+06	301044	382167	655531	1.0877e+06	1.89393e+06	582747	677225	980987	670413	572287	528393	540692
M163T575	163.133	574.6	9.6	1.29911e+07	4.05401e+07	1.4861e+07	1.12116e+07	1.88651e+06	1.00344e+07	4.85597e+06	8.385e+06	5.58564e+06	3.25504e+07	4.84535e+06	3.99904e+06	2.71668e+07	6.62058e+06	2.09143e+07	2.17316e+07	3.74563e+06	1.42819e+06	5.2259e+07	1.64613e+07	1.13894e+07	5.99505e+06	1.77535e+06	2.76218e+07	1.45164e+07	1.37045e+07	1.48886e+07	1.51036e+07	1.02403e+07	1.36024e+07	1.35737e+07
M163T576	163	575.5	9.6	4.23431e+07	2.32334e+07	1.57914e+07	2.78891e+07	4.54807e+07	1.85655e+07	2.25658e+07	1.83193e+07	5.52922e+07	6.67564e+07	4.36471e+07	3.67644e+07	3.22046e+07	4.99e+07	2.06222e+07	4.38563e+07	2.2447e+07	3.28767e+07	4.70008e+07	2.53546e+07	3.53678e+07	3.82819e+07	7.68242e+07	4.32781e+07	3.00903e+07	3.62542e+07	4.34478e+07	3.37756e+07	3.37187e+07	3.72721e+07	3.35894e+07
M163T597	162.996	596.6	9.9	1.96507e+07	1.77499e+07	1.30945e+07	1.95889e+07	1.47124e+07	1.95636e+07	2.00258e+07	1.12776e+07	1.59338e+07	1.57441e+07	1.75893e+07	1.78261e+07	2.00694e+07	1.66895e+07	2.59653e+07	1.16552e+07	2.2163e+07	1.39795e+07	1.80475e+07	1.70815e+07	1.50197e+07	1.38373e+07	1.45255e+07	2.59808e+07	1.65749e+07	1.7937e+07	1.6122e+07	1.79389e+07	1.66598e+07	1.60048e+07	1.83973e+07
M163T608	162.996	608	10.1	8.82243e+06	1.21429e+07	1.50221e+07	1.5482e+07	1.12266e+07	1.36178e+07	1.02711e+07	9.50469e+06	1.1331e+07	9.04065e+06	1.38174e+07	1.79604e+07	1.63324e+07	1.13113e+07	1.29137e+07	1.71148e+07	1.45284e+07	1.63814e+07	1.06976e+07	1.08601e+07	1.39385e+07	2.2846e+07	1.06084e+07	9.66124e+06	1.30705e+07	1.55415e+07	1.35925e+07	1.31814e+07	1.4105e+07	1.29247e+07	1.65293e+07
M163T612	163.112	611.6	10.2	1.36569e+06	1.16065e+06	837161	858789	1.22556e+06	872029	1.21863e+06	1.38223e+06	1.24671e+06	1.0644e+06	1.69192e+06	1.29795e+06	1.35807e+06	490871	813907	1.21911e+06	419382	1.28103e+06	398565	1.1122e+06	1.11638e+06	1.5137e+06	993096	888128	1.13561e+06	1.03925e+06	1.033e+06	1.1167e+06	759645	1.03153e+06	1.11879e+06
M163T634	162.996	634.2	10.6	1.47928e+07	4.11338e+07	8.80233e+06	3.61277e+07	2.29296e+07	5.6884e+07	1.31767e+07	9.70884e+06	3.3453e+07	3.16212e+07	8.82168e+07	6.48599e+07	1.94301e+07	6.45232e+07	3.29056e+07	1.94435e+07	4.98954e+07	3.94905e+07	3.54256e+07	1.71616e+07	9.29634e+06	2.42193e+07	2.47398e+07	3.14226e+07	2.2256e+07	2.26845e+07	2.21718e+07	2.23686e+07	2.57254e+07	3.15559e+07	2.24741e+07
M163T65	163.133	64.7	1.1	2.97952e+06	3.76468e+06	4.68617e+06	3.81461e+06	3.49128e+06	3.2384e+06	2.93345e+06	3.27565e+06	2.67867e+06	3.36626e+06	3.49068e+06	5.24703e+06	4.37846e+06	4.14171e+06	3.55702e+06	3.82136e+06	3.48894e+06	3.81077e+06	3.66785e+06	3.90164e+06	3.25613e+06	2.94434e+06	3.65572e+06	3.08116e+06	3.65865e+06	3.81679e+06	3.43916e+06	3.42771e+06	3.72478e+06	3.53009e+06	3.71634e+06
M163T655	163.148	655.4	10.9	39432.4	99249.6	285790	66645.2	833498	1.06626e+06	113875	805451	343818	548046	159893	1.15218e+06	1.52722e+06	112435	920265	334522	597995	1.97402e+06	1.40908e+06	494399	227647	977383	858826	596749	632233	629566	720033	631163	677828	637116	676232
M163T680	162.995	680.3	11.3	4.52831e+06	6.14658e+06	8.75307e+06	3.93654e+06	6.457e+06	8.07923e+06	5.49622e+06	8.42013e+06	4.79522e+06	6.18557e+06	4.47935e+06	9.25822e+06	2.70431e+06	1.10387e+07	6.71925e+06	6.76501e+06	8.75692e+06	1.08958e+07	8.28718e+06	5.59317e+06	8.41923e+06	4.59815e+06	5.32324e+06	3.54119e+06	5.19619e+06	7.38928e+06	5.95535e+06	4.90652e+06	3.28399e+06	5.90408e+06	6.10297e+06
M163T690	163.148	689.9	11.5	745718	451949	345831	396987	171618	126603	1.46047e+06	521318	645173	553314	1.40226e+06	241561	536442	370564	223699	529439	1.24783e+06	1.11062e+06	332382	502868	406188	1.48681e+06	450590	1.35443e+06	689387	499422	654871	622968	426192	621216	677434
M163T707	163.039	706.7	11.8	9.22927e+06	4.39127e+07	4.14131e+07	2.5169e+07	4.40944e+07	3.5759e+07	3.65085e+07	3.4795e+07	4.03889e+07	4.28043e+07	3.63116e+07	3.83599e+07	2.50988e+07	3.92256e+07	3.33832e+07	5.0744e+07	3.4387e+07	6.38609e+07	3.41804e+07	3.27968e+07	1.12913e+07	2.26165e+07	2.24969e+07	4.3941e+07	3.10069e+07	3.81137e+07	3.6783e+07	3.81059e+07	4.30221e+07	3.65459e+07	3.65982e+07
M163T721	163.075	721.3	12	785832	1.1227e+06	420112	3.29785e+06	401618	371052	340864	205001	653226	550679	731270	409473	1.30282e+06	361852	743624	540839	1.19468e+06	1.79482e+06	1.30811e+06	416621	825976	280491	1.88346e+06	2.14469e+06	1.62377e+06	1.37317e+06	1.3857e+06	1.25028e+06	768597	1.37788e+06	1.03419e+06
M163T742	163.112	741.6	12.4	1.85967e+08	1.81471e+08	1.39413e+08	3.61003e+08	1.22572e+08	1.40664e+08	2.23575e+08	1.18771e+08	1.12271e+08	2.28709e+08	1.36904e+08	5.06657e+08	1.89289e+08	3.51164e+08	1.87745e+08	1.45341e+08	2.97503e+08	1.83609e+08	1.0676e+08	1.70273e+08	2.07896e+08	1.2282e+08	2.63634e+08	2.80946e+08	1.80836e+08	2.21739e+08	1.64339e+08	1.61507e+08	2.20582e+08	2.31814e+08	2.21336e+08
M163T76_1	163.084	75.9	1.3	4.64635e+06	5.06099e+06	6.68737e+06	4.66331e+06	8.02573e+06	7.45492e+06	6.98947e+06	5.40965e+06	5.65889e+06	5.28223e+06	6.34621e+06	8.08497e+06	5.90159e+06	5.17915e+06	5.55518e+06	5.28316e+06	4.42174e+06	3.43833e+06	5.1366e+06	5.56555e+06	4.37802e+06	5.78789e+06	4.87741e+06	3.2811e+06	5.16781e+06	5.06043e+06	5.16808e+06	5.16802e+06	5.27273e+06	5.22528e+06	5.26308e+06
M163T76_2	163.108	75.7	1.3	4.42043e+06	4.71435e+06	6.44329e+06	4.89026e+06	5.67627e+06	4.92026e+06	4.56866e+06	6.53855e+06	5.05983e+06	4.08996e+06	4.40582e+06	4.06215e+06	4.86956e+06	5.63326e+06	6.34731e+06	4.29857e+06	6.14236e+06	6.33587e+06	7.12737e+06	5.48399e+06	5.62078e+06	6.28423e+06	4.87689e+06	6.33772e+06	3.84192e+06	3.84248e+06	3.95896e+06	3.8446e+06	3.52874e+06	4.50864e+06	3.98514e+06
M163T770	163.148	770.4	12.8	442859	340674	312612	495369	955149	353452	1.72408e+06	443724	2.35946e+06	1.737e+06	3.30968e+06	2.76644e+06	1.68458e+06	2.17418e+06	1.38117e+06	1.93815e+06	2.21013e+06	2.40384e+06	1.93452e+06	2.25682e+06	1.13584e+06	242661	2.40619e+06	301453	1.77766e+06	1.38799e+06	1.42239e+06	1.33494e+06	1.48672e+06	632055	1.26145e+06
M163T90	163.116	89.5	1.5	1.09212e+08	2.30572e+08	2.41014e+08	9.6937e+07	2.58962e+08	1.92167e+08	3.72898e+08	2.81361e+08	2.30079e+08	2.2752e+08	2.5337e+08	2.20068e+08	2.27987e+08	2.53646e+08	2.53858e+08	2.50372e+08	2.84393e+08	4.24922e+08	3.54959e+08	2.79979e+08	2.54123e+08	2.80109e+08	2.36921e+08	3.4801e+08	2.49128e+08	2.49189e+08	2.55644e+08	2.49305e+08	2.61689e+08	2.55373e+08	2.55034e+08
M164T107	164.038	107.3	1.8	338097	527120	397910	433034	315224	330179	531386	577212	393796	442948	341954	352165	115112	553828	311185	318505	425866	198494	384789	498591	464177	419680	360201	458995	409836	398978	399014	399788	412218	411843	411704
M164T189	164.073	188.7	3.1	659040	1.83136e+06	4.47969e+06	3.6011e+06	2.19118e+06	1.44928e+06	2.83912e+06	4.95809e+06	2.98503e+06	3.57115e+06	3.1071e+06	4.21812e+06	3.52528e+06	4.27527e+06	3.13062e+06	2.67042e+06	2.32833e+06	2.47682e+06	5.04449e+06	2.65786e+06	2.14292e+06	6.14118e+06	1.64165e+06	2.69995e+06	2.17798e+06	2.17859e+06	2.18739e+06	3.17789e+06	2.35619e+06	2.22499e+06	2.19843e+06
M164T222	164.073	221.9	3.7	4.10197e+06	3.29635e+06	3.55072e+06	4.45245e+06	3.53922e+06	2.34622e+06	3.53489e+06	4.19749e+06	3.96398e+06	4.00525e+06	2.76386e+06	3.21513e+06	4.58895e+06	4.55737e+06	3.34748e+06	2.69929e+06	3.67786e+06	3.71103e+06	4.7265e+06	4.43826e+06	3.98954e+06	2.73653e+06	3.83448e+06	4.12337e+06	3.82646e+06	3.99773e+06	4.01937e+06	4.00001e+06	3.82864e+06	3.82467e+06	3.81699e+06
M164T268	164.074	268.1	4.5	112495	1.47383e+06	1.25559e+06	38276.4	127920	311224	1.05319e+06	1.0359e+06	281733	176485	1.26627e+06	990004	1.26766e+06	777960	796304	778779	703130	987296	37134.5	870446	944463	395002	1.15772e+06	1.00536e+06	890693	890596	891608	913188	911829	891304	969753
M164T35	163.997	35.1	0.6	7.7005e+06	1.07406e+07	1.01192e+07	6.08925e+06	1.26843e+07	9.00066e+06	1.02374e+07	1.0375e+07	1.05163e+07	1.0504e+07	1.41027e+07	1.15145e+07	9.56271e+06	1.02698e+07	1.10251e+07	1.08289e+07	1.07776e+07	1.04301e+07	1.33997e+07	1.19902e+07	1.13034e+07	1.02595e+07	1.08041e+07	1.16329e+07	1.0579e+07	1.04702e+07	1.18976e+07	1.05815e+07	1.07964e+07	9.93205e+06	1.07866e+07
M164T371	164.057	371.3	6.2	191639	243999	213486	229327	208255	230187	219642	189399	173874	256030	203015	198595	310694	226028	237348	235202	213065	227896	222854	201656	209799	214901	204754	203901	210873	206960	226371	218262	212791	221671	242171
M164T394	164.107	393.6	6.6	66884.7	13861.2	63362.2	24461	103503	34517.7	232519	125331	187593	437456	234249	108596	116392	273491	147095	196957	49692	41022.1	65306.8	108923	89988.9	89291.7	98846.4	43563.2	118119	67428.4	111323	92204.9	151319	127756	111245
M164T404	163.999	404.3	6.7	2.44848e+06	2.26791e+06	2.50184e+06	1.72855e+06	1.57063e+06	1.36336e+06	2.25941e+06	1.93884e+06	1.20536e+06	1.83191e+06	2.1942e+06	1.64744e+06	1.93181e+06	1.72117e+06	1.7512e+06	1.63558e+06	1.68786e+06	1.91505e+06	1.05109e+06	1.86641e+06	1.99238e+06	1.82488e+06	1.28813e+06	1.21781e+06	1.38134e+06	1.45932e+06	1.585e+06	1.46696e+06	1.54515e+06	1.17311e+06	1.50763e+06
M164T575	164.136	574.7	9.6	166773	1.12818e+06	1.10566e+06	201201	1.44082e+06	438293	889421	1.08894e+06	995466	1.55597e+06	1.07822e+06	1.20336e+06	397694	1.15278e+06	1.03429e+06	928526	974619	2.9244e+06	1.85392e+06	764835	1.28434e+06	863563	1.56752e+06	2.05741e+06	1.03361e+06	1.25968e+06	1.19662e+06	496761	1.07375e+06	1.199e+06	1.07461e+06
M164T581	164.107	580.7	9.7	202759	548907	184090	339782	263086	229872	943456	236602	562033	820221	608622	322764	428557	339503	133339	507737	259554	1.0575e+06	871510	316591	194939	175466	343001	550640	447353	378892	377974	379196	340784	226805	332073
M164T685	164.107	684.6	11.4	203166	343327	206226	312712	220000	150377	203718	203965	244892	298050	414802	150898	184641	468022	456848	160903	408251	240470	318037	484541	225671	296787	301441	198062	277751	350613	328116	348786	289085	348249	326738
M164T707	164.042	706.7	11.8	3.32123e+06	4.71861e+06	7.64462e+06	2.8893e+06	3.51678e+06	3.45137e+06	3.37031e+06	4.82366e+06	5.0279e+06	7.39968e+06	5.31486e+06	6.01255e+06	4.33757e+06	6.56062e+06	6.86776e+06	4.85459e+06	4.41464e+06	5.65522e+06	3.17565e+06	3.04542e+06	3.96863e+06	745520	6.2588e+06	7.18213e+06	3.3369e+06	3.3477e+06	4.41656e+06	3.1712e+06	3.53045e+06	3.51758e+06	3.53456e+06
M164T742	164.115	741.6	12.4	9.40188e+06	1.0489e+07	2.71137e+07	2.15245e+07	2.64987e+07	4.15959e+07	1.14668e+07	3.46012e+07	1.24279e+07	2.54712e+07	1.89418e+07	5.29092e+07	2.13791e+07	4.00742e+07	2.25712e+07	1.24751e+07	3.28645e+07	9.04394e+06	3.86089e+07	3.53011e+07	2.50396e+07	1.29721e+07	1.28615e+07	1.60489e+07	2.71432e+07	3.0022e+07	2.71007e+07	1.93399e+07	2.72848e+07	2.71173e+07	1.50836e+07
M164T83	164.008	83.1	1.4	5.38919e+06	4.41661e+06	5.11117e+06	4.71964e+06	5.25518e+06	5.23649e+06	4.63368e+06	4.6935e+06	4.89082e+06	4.94253e+06	4.71771e+06	4.63811e+06	4.23923e+06	4.7508e+06	4.84855e+06	4.90466e+06	4.99586e+06	4.73626e+06	4.51527e+06	4.46431e+06	4.52295e+06	5.9081e+06	4.41113e+06	4.82979e+06	4.72172e+06	4.53053e+06	4.77178e+06	4.77262e+06	4.83382e+06	4.75296e+06	4.71942e+06
M164T84	163.978	84.2	1.4	8.7787e+07	1.11145e+07	7.80899e+07	1.2972e+07	4.18513e+07	1.31428e+08	1.58243e+08	1.13912e+08	5.14063e+07	4.25501e+07	5.33618e+07	2.55054e+07	8.52107e+07	3.6756e+07	5.90872e+07	6.58377e+07	1.43536e+07	8.90222e+07	9.2159e+06	9.9392e+07	6.86734e+07	7.43371e+07	4.72032e+07	5.51539e+07	7.03801e+07	7.00877e+07	7.04101e+07	7.19387e+07	8.27777e+07	7.03729e+07	7.19537e+07
M164T90	164.117	89.5	1.5	1.58838e+07	8.04345e+06	3.65755e+07	4.54223e+06	5.92557e+07	2.69906e+07	5.25958e+07	5.26333e+07	4.46205e+07	4.73923e+07	4.42411e+07	4.13877e+07	4.68894e+07	5.43966e+07	3.60842e+07	3.33752e+07	1.19197e+07	2.29181e+07	7.18907e+07	5.93617e+07	1.65368e+07	7.3157e+07	5.29598e+07	5.31483e+07	1.61906e+07	1.61065e+07	2.4988e+07	1.62181e+07	1.63186e+07	1.95892e+07	1.82527e+07
M165T101	165.076	100.6	1.7	822482	812908	837585	922352	911601	939194	882023	895301	853503	814050	951623	901894	866662	964207	793218	878740	1.04457e+06	1.15322e+06	1.06805e+06	931323	909733	943781	894223	914994	864913	828430	818036	865973	863830	848841	863813
M165T107	165.113	106.8	1.8	834981	812891	866635	700643	804696	1.42128e+06	637224	793042	1.64287e+06	1.30764e+06	1.64032e+06	1.95044e+06	1.42543e+06	1.43261e+06	1.28338e+06	1.42405e+06	724987	908363	854386	638106	641550	1.47302e+06	1.31114e+06	1.07019e+06	1.03654e+06	1.04897e+06	1.03187e+06	1.01543e+06	1.04899e+06	1.04903e+06	1.08013e+06
M165T124	165.054	124.3	2.1	3.44867e+07	3.71684e+08	2.50334e+08	2.30736e+08	2.878e+08	4.25479e+08	6.69928e+08	5.06608e+08	1.05909e+08	2.56134e+08	3.16365e+08	4.1589e+08	8.72989e+07	9.22155e+08	4.33017e+08	6.58018e+08	4.17148e+08	4.97506e+08	3.95438e+08	9.00232e+07	4.29325e+08	8.93873e+07	2.82914e+08	5.92193e+08	1.3729e+08	1.4711e+08	1.81562e+08	2.26621e+08	1.77022e+08	1.46118e+08	1.46751e+08
M165T140	165.054	139.6	2.3	9.7297e+07	1.1767e+08	1.85514e+08	1.17322e+08	1.39929e+08	6.59105e+07	9.46752e+07	1.00235e+08	1.17621e+08	1.18468e+08	8.12766e+07	6.38477e+07	1.26696e+08	1.14475e+08	7.08572e+07	6.6162e+07	1.40639e+08	9.27803e+07	1.32333e+08	2.67285e+08	1.22565e+08	1.08057e+08	6.8649e+07	1.3532e+08	9.14271e+07	9.45831e+07	7.25832e+07	9.14044e+07	9.43566e+07	9.92378e+07	9.23784e+07
M165T319	165.066	319.1	5.3	470877	561112	367125	766284	267123	444209	568649	569443	713710	1.02474e+06	718600	796946	2.3484e+06	1.0808e+06	772495	758176	1.73605e+06	134931	3.79429e+06	647715	578900	941184	4.71069e+06	530321	789428	1.05025e+06	585602	1.37075e+06	1.1693e+06	965868	972072
M165T332	165.113	332.1	5.5	4.14506e+06	1.62763e+06	3.3434e+06	1.42007e+06	4.92634e+06	3.50874e+06	4.19437e+06	5.65518e+06	4.48197e+06	1.47787e+06	5.11681e+06	1.55172e+06	1.45629e+06	1.44182e+06	1.63751e+06	3.69603e+06	2.03379e+06	1.45995e+06	1.38179e+06	2.50436e+06	2.66289e+06	3.90936e+06	1.51492e+06	1.69317e+06	2.78376e+06	2.24422e+06	2.81659e+06	2.71376e+06	2.78454e+06	2.70597e+06	2.84444e+06
M165T344	165.113	343.8	5.7	2.42101e+06	625764	2.0504e+06	3.33085e+06	5.23984e+06	633281	3.1682e+06	3.26538e+06	894377	2.91788e+06	1.48114e+06	583683	984774	3.13292e+06	6.13376e+06	2.86286e+06	2.86781e+06	1.85163e+06	2.39112e+06	2.59752e+06	3.36465e+06	4.45505e+06	2.77727e+06	2.79977e+06	3.13439e+06	1.59119e+06	1.85295e+06	1.96438e+06	2.38568e+06	2.21756e+06	1.56896e+06
M165T360	165.113	359.6	6	1.4045e+06	1.28913e+06	1.20944e+06	1.47485e+06	1.71628e+06	1.39552e+06	1.60019e+06	296698	1.25521e+06	1.50407e+06	1.43867e+06	1.26784e+06	1.62638e+06	963987	1.97016e+06	1.67816e+06	1.90265e+06	1.41419e+06	2.35693e+06	1.94081e+06	1.34152e+06	1.17523e+06	1.39288e+06	1.15188e+06	1.47149e+06	1.41995e+06	1.47139e+06	1.4542e+06	1.47114e+06	1.4192e+06	1.00645e+06
M165T400	165.01	399.5	6.7	1.02003e+06	657239	1.21288e+06	1.18629e+06	1.2253e+06	1.24304e+06	1.23897e+06	1.25661e+06	1.57643e+06	832809	1.57498e+06	1.37603e+06	1.65079e+06	415810	470334	2.06543e+06	1.48926e+06	1.92304e+06	1.14744e+06	1.10326e+06	1.67467e+06	566084	926073	1.25022e+06	608887	738425	548644	774258	811762	781402	772509
M165T555	165.102	555.2	9.3	685584	265826	572995	828842	902701	688633	1.0709e+06	572987	528908	646786	844816	1.06106e+06	301777	380684	780842	697492	738194	592386	439895	549576	676662	568009	290693	435526	554814	668852	550823	736493	562439	620508	627140
M165T64	164.994	64	1.1	3.35961e+06	7.93814e+06	3.84514e+06	3.82278e+06	5.2646e+06	1.00247e+07	1.08497e+07	1.32689e+07	6.18152e+06	7.23204e+06	7.09673e+06	8.53653e+06	1.14806e+07	9.0739e+06	6.97012e+06	1.26605e+07	1.11625e+07	1.25524e+07	1.21956e+07	3.55374e+06	2.68662e+06	1.31885e+07	8.68125e+06	1.13726e+07	3.7639e+06	8.0378e+06	9.84909e+06	8.25461e+06	8.98322e+06	1.13634e+07	9.47612e+06
M165T701	165.127	701.2	11.7	745694	771697	1.02612e+06	666244	184663	849804	942190	949128	805681	750145	1.23865e+06	1.2304e+06	787980	738705	339204	1.0066e+06	701535	1.07086e+06	549446	446323	701452	617041	755409	653756	739443	762536	769142	739846	763260	583876	739061
M165T741	165.118	741.5	12.4	791283	1.48396e+06	1.02593e+06	412120	710929	334588	470693	871849	829609	1.5484e+06	1.19359e+06	832606	764966	1.24617e+06	1.29482e+06	1.31825e+06	845047	858010	1.21408e+06	2.37358e+06	1.27316e+06	996602	814612	551751	911983	916226	913997	938142	1.01942e+06	632157	1.19037e+06
M165T746	165.091	745.6	12.4	1.22519e+06	1.28953e+06	1.22243e+06	1.30482e+06	296854	972271	1.22703e+06	530361	1.38329e+06	511819	439281	1.16654e+06	603868	1.4583e+06	1.47431e+06	1.46346e+06	411508	501603	460333	1.36167e+06	1.24465e+06	1.50582e+06	577604	929866	1.2282e+06	1.30956e+06	1.3092e+06	1.27328e+06	690334	1.32854e+06	1.30486e+06
M165T801	165.076	801.5	13.4	682451	402564	697061	875272	1.24668e+06	797600	503096	1.64066e+06	1.04495e+06	1.28004e+06	928981	1.17648e+06	1.00646e+06	1.09054e+06	692458	924590	327946	1.63477e+06	742529	399011	663417	1.05182e+06	1.53775e+06	1.63403e+06	796968	868334	801941	867374	795702	864796	926429
M165T82	164.93	81.8	1.4	1.1219e+07	3.13774e+07	3.29647e+07	1.49447e+07	2.16104e+07	2.55597e+07	2.12185e+07	1.87487e+07	2.88978e+07	2.52268e+07	2.23881e+07	3.91379e+07	2.54925e+07	3.39096e+07	2.3086e+07	1.88365e+07	2.71188e+07	2.71413e+07	2.80698e+07	1.89211e+07	3.56861e+07	2.70592e+07	2.16377e+07	2.23973e+07	1.67326e+07	2.81506e+07	2.7137e+07	2.81388e+07	2.61622e+07	2.80828e+07	2.62923e+07
M165T98	165.113	97.7	1.6	2.17396e+06	1.08572e+06	784419	4.23203e+06	608214	400067	923222	2.10538e+06	251848	552772	388139	490821	429744	515781	1.18477e+06	696307	2.00142e+06	440928	1.21437e+06	3.49932e+06	1.20774e+06	885116	1.21995e+06	398955	1.04083e+06	711308	715372	1.25991e+06	1.09873e+06	1.08787e+06	1.0942e+06
M165T99	165.1	98.5	1.6	527626	59008.3	489719	105502	701623	75357.9	638815	593593	597017	282552	1.02745e+06	690222	479533	845016	560203	928937	168472	795523	970022	498041	616366	702687	514896	1.35227e+06	468250	534080	534194	592423	534322	520960	521033
M166T122	166.086	121.6	2	1.51116e+07	3.786e+07	2.1353e+07	3.58211e+07	1.66126e+07	1.69503e+06	3.37789e+06	2.33973e+07	1.64836e+06	2.28818e+06	2.32311e+06	2.8903e+06	1.00955e+07	2.66949e+06	1.94013e+06	2.53784e+06	5.00212e+07	621539	2.3264e+07	3.13937e+07	3.053e+07	1.09735e+07	1.64051e+06	1.69211e+07	1.18466e+07	8.07145e+06	1.18808e+07	1.05977e+07	1.18114e+07	1.1876e+07	7.38776e+06
M166T124	166.058	124.4	2.1	1.54864e+07	1.76192e+07	1.55367e+07	1.56979e+07	1.44037e+07	1.99555e+07	1.752e+07	1.80453e+07	1.42869e+07	2.37134e+07	3.06112e+07	1.85432e+07	2.22434e+07	1.70838e+07	1.98787e+07	1.85832e+07	1.80085e+07	2.01101e+07	2.23488e+07	1.81675e+07	2.15e+07	3.04699e+07	1.90567e+07	3.92746e+07	1.45546e+07	1.46233e+07	1.60716e+07	1.51615e+07	1.74329e+07	1.55503e+07	1.67395e+07
M166T137	165.998	136.5	2.3	57742.6	51817.1	308858	319656	252236	24346.7	47327.2	64512.9	1.94356e+06	1.30382e+06	2.51927e+06	2.85611e+06	1.98412e+06	2.75733e+06	2.87316e+06	2.35321e+06	103521	3.14914e+06	505505	273459	365586	1.77499e+06	2.9663e+06	1.1264e+06	508591	1.14598e+06	1.14598e+06	1.07211e+06	1.14903e+06	1.15226e+06	1.12166e+06
M166T139	166.058	139.4	2.3	6.34666e+06	7.54176e+06	8.25443e+06	6.66822e+06	9.7364e+06	1.19188e+07	7.95616e+06	7.1219e+06	8.18741e+06	6.88488e+06	6.88416e+06	9.3144e+06	9.13352e+06	6.48643e+06	7.34961e+06	7.8373e+06	5.44575e+06	4.70705e+06	6.28503e+06	6.93166e+06	5.21239e+06	9.48994e+06	7.2801e+06	3.96714e+06	7.2511e+06	7.85556e+06	7.6898e+06	7.85946e+06	7.96481e+06	6.89581e+06	7.69083e+06
M166T33	165.981	33.1	0.6	5.07108e+06	4.95883e+06	4.89224e+06	5.28588e+06	3.91018e+06	3.49941e+06	5.15585e+06	5.51072e+06	6.20126e+06	7.33096e+06	6.13999e+06	5.60955e+06	5.45111e+06	7.74956e+06	5.85895e+06	6.1331e+06	7.24109e+06	8.03871e+06	6.86813e+06	6.61378e+06	7.87407e+06	6.46462e+06	7.14702e+06	8.61886e+06	5.93308e+06	5.71836e+06	5.93206e+06	5.93181e+06	5.83753e+06	5.89297e+06	5.93176e+06
M166T332	166.073	331.5	5.5	6.08367e+06	6.56975e+06	5.3349e+06	5.47232e+06	6.51445e+06	5.71199e+06	7.28642e+06	7.13413e+06	5.67266e+06	5.95956e+06	6.8558e+06	7.73971e+06	6.16055e+06	5.71601e+06	6.68407e+06	6.22496e+06	5.42472e+06	4.26459e+06	4.62068e+06	5.89436e+06	4.2323e+06	5.83932e+06	5.07803e+06	3.06083e+06	5.51447e+06	5.50499e+06	5.61521e+06	5.84712e+06	5.72698e+06	5.29959e+06	5.6729e+06
M166T338_2	166.086	338.4	5.6	6.46705e+09	5.81978e+09	2.78163e+09	7.6701e+09	6.27138e+09	1.10227e+09	4.54631e+09	2.65799e+09	6.88819e+09	3.6746e+09	6.3111e+09	5.6762e+09	5.48637e+09	2.7622e+09	3.76329e+09	3.83045e+09	1.02055e+10	6.21576e+09	4.76384e+09	4.87088e+09	4.47178e+09	2.13348e+09	6.89486e+09	5.26617e+09	4.36008e+09	4.495e+09	4.49663e+09	4.61854e+09	4.36733e+09	3.78703e+09	4.36087e+09
M166T338_3	166.212	338.4	5.6	1.48889e+06	1.57204e+06	1.64706e+06	1.57616e+06	1.27144e+06	1.42673e+06	1.7287e+06	1.50595e+06	2.0594e+06	2.0615e+06	2.43489e+06	2.10221e+06	2.75642e+06	2.19029e+06	2.72244e+06	2.52655e+06	1.74393e+06	2.36609e+06	2.03801e+06	1.32092e+06	1.47017e+06	1.8833e+06	1.32204e+06	1.6831e+06	1.64821e+06	1.59645e+06	1.64527e+06	1.65149e+06	1.58595e+06	1.42909e+06	1.59072e+06
M166T497	166.123	497.3	8.3	436005	263253	333464	236098	422017	288070	349132	284797	313749	340340	493593	579290	454726	270678	556049	398654	585319	520685	634086	708365	715521	631859	526022	546373	389461	429036	207335	421575	389862	443029	281523
M166T524	166.036	524.1	8.7	109446	205244	154643	473336	207725	406942	513025	188781	312904	621378	146145	626158	195552	170087	595430	126022	169512	652492	612994	128764	492157	426961	306672	146101	240888	266359	375894	308862	165900	297741	249672
M166T799	165.983	798.9	13.3	4.12206e+06	3.8585e+06	3.2529e+06	3.95523e+06	4.90348e+06	3.04163e+06	3.31005e+06	1.39584e+06	4.09814e+06	3.76994e+06	3.2472e+06	4.84703e+06	3.16972e+06	4.13856e+06	3.90042e+06	3.74746e+06	1.62614e+06	1.64164e+06	2.99357e+06	3.49277e+06	3.28288e+06	2.18734e+06	3.46936e+06	2.62883e+06	3.41539e+06	2.9683e+06	3.16846e+06	3.16981e+06	3.1694e+06	3.54158e+06	3.22517e+06
M166T83	165.988	83	1.4	5.44424e+06	5.46055e+06	5.65132e+06	6.04704e+06	5.60991e+06	5.5761e+06	5.34018e+06	6.53618e+06	6.94275e+06	5.44374e+06	5.43362e+06	5.68554e+06	5.89668e+06	5.62337e+06	5.6586e+06	5.51644e+06	5.33414e+06	6.68261e+06	6.91957e+06	8.60939e+06	6.22604e+06	6.51093e+06	5.18083e+06	5.69853e+06	5.62272e+06	5.59777e+06	5.70929e+06	5.62446e+06	5.70371e+06	5.62729e+06	5.70461e+06
M166T89	166.053	89.4	1.5	2.72869e+07	2.6761e+07	2.57677e+07	2.83496e+07	3.69423e+07	3.43812e+07	3.15464e+07	3.00338e+07	2.8963e+07	2.8577e+07	2.79853e+07	3.05863e+07	2.69281e+07	2.87814e+07	3.56924e+07	3.01554e+07	2.96735e+07	4.66456e+07	3.15755e+07	3.24564e+07	2.80563e+07	4.00077e+07	2.85297e+07	2.88293e+07	3.23512e+07	3.09864e+07	3.05989e+07	3.09951e+07	3.16422e+07	3.10031e+07	3.157e+07
M167T113	167.118	113.2	1.9	966192	1.09879e+06	1.23548e+06	1.10718e+06	788937	1.30363e+06	1.00256e+06	877746	1.15216e+06	1.06116e+06	1.38919e+06	1.01093e+06	1.22536e+06	994631	1.06989e+06	1.24713e+06	1.13775e+06	1.04395e+06	1.32301e+06	1.05706e+06	1.18705e+06	1.31707e+06	1.15377e+06	1.08699e+06	1.10314e+06	1.12695e+06	1.09572e+06	1.20371e+06	1.4167e+06	1.19999e+06	1.12585e+06
M167T116	167.093	116.3	1.9	9.95512e+06	1.53982e+06	7.34444e+06	5.57837e+06	1.31413e+07	3.17915e+07	5.28368e+06	6.67235e+06	2.08193e+07	1.27687e+07	9.27823e+06	1.99853e+07	1.19333e+07	1.35582e+07	2.22631e+07	2.61088e+07	8.4318e+06	1.84237e+06	2.14461e+07	7.63584e+06	9.06156e+06	8.87356e+06	7.87086e+06	2.51335e+07	2.19924e+07	2.9734e+07	1.71e+07	1.65514e+07	1.55072e+07	2.41801e+07	2.48646e+07
M167T34	166.98	33.7	0.6	2.03371e+06	1.02533e+07	1.12245e+07	1.53156e+06	1.19464e+07	8.19292e+06	1.10164e+07	1.00721e+07	1.17358e+07	1.0744e+07	1.40985e+07	1.19943e+07	9.39437e+06	1.02872e+07	1.10346e+07	1.00693e+07	1.19826e+07	1.06073e+07	1.38683e+07	1.25156e+07	1.07783e+07	1.07843e+07	1.04589e+07	1.21029e+07	1.04914e+07	1.04912e+07	1.05466e+07	1.0637e+07	1.06615e+07	1.05001e+07	1.06979e+07
M167T565	167.055	565.4	9.4	1.49959e+06	1.05948e+06	1.51321e+06	2.98847e+06	2.15229e+06	591258	1.83679e+06	1.35271e+06	2.06962e+06	1.06321e+06	1.66296e+06	1.5814e+06	2.24421e+06	1.67365e+06	3.06159e+06	3.72279e+06	2.34527e+06	1.11885e+06	3.15331e+06	2.27089e+06	1.35092e+06	1.98305e+06	817160	2.46567e+06	1.88272e+06	1.99542e+06	1.44094e+06	1.99334e+06	998489	2.00105e+06	1.99347e+06
M167T604	167.107	603.7	10.1	2.31136e+06	3.58011e+06	899653	2.947e+06	773845	841875	851370	2.20991e+06	1.77975e+06	708391	1.18207e+06	1.06018e+06	1.04462e+06	990446	2.31106e+06	799845	907566	1.04441e+06	1.47637e+06	645757	687389	1.96871e+06	1.92149e+06	693546	2.72338e+06	1.94377e+06	2.71507e+06	2.64224e+06	2.72246e+06	2.72633e+06	2.43988e+06
M167T62	166.98	62.4	1	1.99378e+07	2.68016e+07	1.71811e+07	3.07615e+07	2.4844e+07	9.24274e+06	1.28287e+07	1.4054e+07	2.20386e+07	1.42755e+07	1.31432e+07	5.47702e+06	1.63697e+07	1.74784e+07	1.75099e+07	1.62166e+07	1.5725e+07	1.4107e+07	2.1805e+07	1.29191e+07	5.20044e+06	1.97718e+07	1.48957e+07	1.07613e+07	1.34185e+07	1.46595e+07	1.33631e+07	1.16767e+07	1.3664e+07	1.36653e+07	1.00224e+07
M167T623	167.107	623.5	10.4	1.48204e+06	1.69906e+06	3.72102e+06	2.50739e+06	3.95053e+06	2.21933e+06	1.51647e+06	2.10692e+06	2.15061e+06	2.9894e+06	2.90577e+06	2.8129e+06	729935	2.28288e+06	1.87399e+06	1.70929e+06	2.66764e+06	1.58353e+06	2.99892e+06	2.75562e+06	1.27241e+06	1.64457e+06	1.87507e+06	3.50775e+06	1.51786e+06	2.61975e+06	2.12784e+06	1.98181e+06	1.85271e+06	1.9138e+06	1.79942e+06
M167T677	167.07	677.5	11.3	2.79882e+06	2.11937e+06	2.37586e+06	2.27101e+06	1.94317e+06	1.12866e+06	1.76618e+06	2.33095e+06	1.98778e+06	2.92313e+06	2.01024e+06	1.67339e+06	2.38925e+06	2.27517e+06	1.93512e+06	2.47657e+06	2.78444e+06	1.71733e+06	2.74857e+06	2.83469e+06	1.65582e+06	2.77846e+06	1.44878e+06	1.75917e+06	2.63313e+06	2.58398e+06	2.44013e+06	2.58391e+06	2.55492e+06	2.40558e+06	2.58384e+06
M167T72	167.013	72.1	1.2	3.94775e+07	5.87845e+07	6.86438e+07	3.57902e+07	4.15721e+07	3.54809e+07	5.08953e+07	4.67724e+07	3.72845e+07	4.26102e+07	4.23301e+07	4.14349e+07	3.09978e+07	3.72039e+07	4.28286e+07	3.77224e+07	3.96787e+07	3.32003e+07	5.41063e+07	4.68637e+07	4.12281e+07	3.7957e+07	3.04845e+07	3.55403e+07	3.82889e+07	4.31044e+07	4.13948e+07	4.18876e+07	4.13988e+07	4.1386e+07	4.19404e+07
M167T762	167.012	762.1	12.7	1.44073e+06	1.25697e+06	2.70639e+06	1.53521e+06	2.48227e+06	2.91459e+06	1.08691e+06	2.43613e+06	2.67722e+06	3.63064e+06	3.47882e+06	3.20456e+06	1.28389e+06	3.03959e+06	2.52454e+06	2.12931e+06	2.20797e+06	3.23489e+06	2.56369e+06	4.0601e+06	2.29877e+06	2.15775e+06	4.01309e+06	1.32704e+06	1.94971e+06	2.57417e+06	2.06214e+06	2.02214e+06	2.114e+06	2.25909e+06	2.26343e+06
M167T823	167.07	823.2	13.7	3.56928e+07	1.20124e+08	4.41979e+07	1.12742e+08	3.84342e+07	3.20305e+07	4.21262e+07	2.1716e+07	1.01993e+08	3.48452e+07	8.33453e+07	3.09334e+07	1.37598e+08	3.33644e+07	5.41145e+07	4.12867e+07	1.15507e+08	1.7866e+08	1.13323e+08	4.51116e+07	5.02149e+07	4.5931e+07	7.73064e+07	1.3859e+08	6.09344e+07	5.5727e+07	5.39923e+07	5.68266e+07	5.41289e+07	5.58174e+07	5.28271e+07
M167T89	167.056	89.3	1.5	651864	498116	564960	735742	239916	480623	269123	221589	3.8688e+06	2.76527e+06	5.97911e+06	4.13235e+06	3.64663e+06	4.38289e+06	1.95279e+06	604762	285329	4.02462e+06	578320	597780	508961	1.55543e+07	9.44507e+06	2.83079e+07	1.71114e+06	2.28415e+06	1.85564e+06	2.58062e+06	2.27457e+06	2.56709e+06	1.25173e+06
M167T99	167.081	98.9	1.6	1.20601e+06	701082	1.28741e+06	912934	483298	1.34617e+06	806499	1.33432e+06	241700	1.02973e+06	899923	590376	343215	626972	804632	719349	776757	305869	1.3169e+06	1.14084e+06	1.97293e+06	880610	893184	1.21263e+06	894928	895161	840264	895064	927626	866067	895009
M168T105	168.033	105.1	1.8	9.4755e+06	8.88641e+06	1.20591e+07	1.28667e+07	1.30943e+07	8.55705e+06	1.0325e+07	9.98885e+06	3.47331e+06	6.59755e+06	6.86034e+06	1.09757e+07	1.30022e+07	8.83175e+06	1.0015e+07	6.55991e+06	9.6438e+06	1.25929e+07	1.16222e+07	1.03606e+07	8.71366e+06	7.17926e+06	1.06138e+07	9.77963e+06	1.10717e+07	7.38503e+06	8.549e+06	9.56632e+06	8.67003e+06	8.60554e+06	8.92418e+06
M168T130	167.977	130	2.2	7.66913e+07	5.07708e+07	4.86573e+07	5.18692e+07	5.96288e+07	4.39808e+07	3.88497e+07	5.48798e+07	5.37837e+07	1.42698e+07	5.55871e+07	4.84502e+07	4.11155e+07	6.04772e+07	4.19587e+07	5.19501e+07	6.4459e+07	3.99254e+07	6.22662e+07	5.7522e+07	3.76831e+07	6.51194e+07	5.16862e+07	4.90109e+07	5.13241e+07	4.56803e+07	1.75202e+07	4.471e+07	5.16598e+07	5.02782e+07	5.16841e+07
M168T152	167.977	152.4	2.5	7.42312e+07	1.24358e+08	7.83276e+07	1.34582e+08	1.09064e+08	2.37786e+07	1.07815e+08	1.21342e+08	7.28017e+07	1.54021e+08	7.94946e+07	1.25751e+08	1.05929e+08	8.19531e+07	7.64975e+07	7.36586e+07	6.53158e+07	8.82752e+07	1.45209e+08	8.64082e+07	5.18049e+07	1.00349e+08	1.05676e+08	1.40243e+08	1.26628e+08	1.24752e+08	1.26672e+08	1.25312e+08	1.43495e+08	1.24776e+08	1.2479e+08
M168T163	167.975	163.2	2.7	1.80661e+07	1.82292e+07	2.15478e+07	2.35704e+07	1.82634e+07	1.2821e+07	2.11205e+07	1.5117e+07	1.84135e+07	1.31858e+07	2.57352e+07	1.56541e+07	1.16828e+07	1.83801e+07	1.18395e+07	1.13084e+07	1.96886e+07	1.11033e+07	1.24337e+07	1.55575e+07	2.20853e+07	2.36329e+07	1.1295e+07	2.12032e+07	1.56522e+07	1.56566e+07	1.56728e+07	1.6037e+07	1.60206e+07	1.71667e+07	1.60316e+07
M168T194	167.975	194.5	3.2	3.27922e+07	4.14356e+07	3.78574e+07	4.33851e+07	4.18072e+07	2.78208e+07	3.09692e+07	3.73899e+07	2.37777e+07	2.01695e+07	2.44962e+07	2.27549e+07	2.83512e+07	2.07601e+07	2.49142e+07	2.6093e+07	3.32266e+07	5.00589e+07	5.41739e+07	5.1111e+07	3.40561e+07	2.30871e+07	2.03062e+07	3.23157e+07	3.10769e+07	3.14173e+07	2.75445e+07	3.16999e+07	3.15424e+07	3.50464e+07	3.16892e+07
M168T231	167.975	231.1	3.9	6.06411e+07	1.33523e+08	5.09955e+07	5.71207e+07	9.07407e+07	4.90059e+07	9.95771e+07	5.85792e+07	1.23264e+07	3.04491e+07	1.06294e+07	2.95086e+07	2.93807e+07	4.50853e+07	4.03026e+07	2.2988e+07	5.87161e+07	4.78435e+06	9.95551e+07	5.06948e+07	1.80904e+07	4.81966e+07	2.40389e+07	4.07015e+07	4.5016e+07	4.49964e+07	4.49501e+07	3.88321e+07	4.35988e+07	4.5009e+07	4.26727e+07
M168T250	167.975	249.8	4.2	9.21366e+06	1.93309e+07	1.35268e+07	3.33435e+07	1.16977e+07	1.33427e+07	2.12151e+07	3.06088e+07	8.92687e+06	1.19046e+07	1.54811e+07	9.56867e+06	2.426e+07	7.80756e+06	9.42387e+06	8.39107e+06	1.46809e+07	1.55151e+07	2.45748e+07	1.96249e+07	1.43839e+07	1.81972e+07	1.36643e+07	8.45023e+06	1.35405e+07	1.26397e+07	1.40382e+07	1.3728e+07	1.59644e+07	1.40659e+07	1.41868e+07
M168T290	167.975	289.7	4.8	6.02128e+07	1.12797e+08	1.11868e+08	1.10934e+08	1.26517e+08	9.58716e+07	8.37704e+07	3.51125e+07	2.16607e+08	1.48153e+08	1.94367e+08	2.39661e+08	2.05292e+08	2.13212e+08	1.50835e+08	2.03462e+08	1.10169e+08	5.81221e+07	1.4682e+08	1.79842e+08	8.8569e+07	1.16771e+08	3.06099e+08	2.00996e+08	8.60397e+07	8.68738e+07	9.03454e+07	8.79463e+07	1.04364e+08	1.05255e+08	9.13033e+07
M168T302	168.123	302.2	5	370502	464586	370715	507441	1.05494e+06	371136	491979	344355	929583	265325	208283	514050	679661	216833	662623	244493	336221	80773	358992	691227	955236	766071	669283	351683	570503	582225	861951	570027	879356	560581	498651
M168T339	168.091	338.6	5.6	3.80286e+06	1.13452e+07	1.09744e+07	5.1264e+06	1.16892e+07	1.29193e+07	1.51608e+07	1.45185e+07	1.93148e+07	9.91907e+06	1.67794e+07	1.79474e+07	2.60119e+07	1.74518e+07	1.21976e+07	1.31357e+07	1.35222e+07	2.95312e+07	1.57382e+07	9.02803e+06	1.0447e+07	1.65386e+07	8.92982e+06	2.64071e+07	1.20302e+07	1.35182e+07	1.19545e+07	1.33685e+07	1.12127e+07	1.38785e+07	1.31586e+07
M168T35	167.976	34.9	0.6	8.44462e+07	8.99494e+07	7.21481e+07	7.1666e+07	6.5222e+07	8.01605e+07	9.86309e+07	7.49939e+07	7.86713e+07	8.96858e+07	4.63998e+08	8.46694e+07	4.59869e+08	7.5842e+07	8.75574e+07	8.81179e+07	1.0286e+08	4.20024e+08	7.87351e+07	5.38499e+08	7.70752e+07	8.65945e+07	6.62266e+07	7.7313e+07	8.39236e+07	8.39332e+07	7.35649e+07	8.70292e+07	8.31815e+07	8.28053e+07	8.28257e+07
M168T406	167.979	405.9	6.8	1.11079e+07	1.33545e+07	2.07146e+07	2.73127e+06	1.33762e+07	1.33483e+07	2.01777e+07	1.19312e+07	1.71019e+07	1.43294e+07	1.7853e+07	2.12207e+07	3.31146e+06	1.86057e+07	1.55613e+07	1.65378e+07	1.87898e+07	1.50396e+07	1.73809e+07	1.96218e+07	2.25273e+07	1.18271e+07	1.49849e+07	1.46079e+07	1.55254e+07	1.70529e+07	1.60129e+07	1.41163e+07	1.62254e+07	1.62221e+07	9.35025e+06
M168T463	167.979	462.9	7.7	7.04866e+06	9.09041e+06	9.72826e+06	2.42194e+06	2.19748e+06	6.23257e+06	9.5939e+06	1.19384e+07	5.14281e+06	7.75769e+06	1.13656e+07	5.98911e+06	5.33607e+06	5.5621e+06	1.05949e+07	5.80337e+06	7.12406e+06	5.45088e+06	8.94789e+06	8.67437e+06	1.20645e+07	9.16743e+06	1.8669e+06	1.12701e+07	5.69191e+06	5.69313e+06	2.74968e+06	4.85308e+06	4.65435e+06	6.20819e+06	5.76609e+06
M168T472	167.975	472.2	7.9	2.11939e+08	1.94286e+08	1.75438e+08	1.04584e+07	1.81133e+08	2.0723e+08	1.92249e+08	1.84517e+08	2.40916e+07	1.8102e+08	2.84751e+07	1.78425e+08	2.71473e+07	1.88526e+08	2.12088e+07	2.16375e+07	1.11149e+07	3.18043e+07	3.07005e+07	9.85254e+06	1.06953e+07	5.80474e+06	1.02683e+07	2.19126e+07	8.16735e+06	1.3374e+07	1.38595e+07	1.38809e+07	1.38756e+07	1.36796e+07	1.32198e+07
M168T490	167.979	490.1	8.2	4.52445e+06	5.58692e+06	1.72763e+06	4.12793e+06	3.06279e+06	1.59285e+06	5.53114e+06	5.96403e+06	5.90731e+06	6.29671e+06	5.32656e+06	3.43552e+06	3.27768e+06	6.84162e+06	4.23003e+06	2.24689e+06	7.63396e+06	2.72989e+06	6.28313e+06	6.74784e+06	7.86636e+06	4.31276e+06	4.28135e+06	5.56602e+06	5.03121e+06	4.91723e+06	4.91711e+06	5.10271e+06	4.92059e+06	5.68681e+06	4.90736e+06
M168T523	167.977	523.2	8.7	8.63202e+06	947.054	187.585	1.05499e+07	8.1834e+06	8.89815e+06	2803.83	1850.81	7.38247e+06	6.3604e+06	1614.21	2447.51	225.945	1513.17	391.214	1.3985e+06	401.378	1.55857e+06	9.14198e+06	2688.4	254126	4.28063e+06	1010.31	3284.48	3.86113e+06	3.84755e+06	3.85009e+06	3.89519e+06	3.7369e+06	3.54884e+06	3.73634e+06
M168T530	168.102	530.1	8.8	6.87579e+06	4.46647e+06	6.70659e+06	5.47817e+06	5.4029e+06	4.88457e+06	6.43705e+06	5.35765e+06	5.17797e+06	4.60327e+06	6.79941e+06	5.26502e+06	6.86683e+06	9.52509e+06	8.34139e+06	1.10752e+07	5.63374e+06	4.79982e+06	9.47334e+06	9.50834e+06	4.8862e+06	6.01171e+06	4.17588e+06	3.90107e+06	4.8617e+06	5.4529e+06	5.60149e+06	5.16805e+06	5.16253e+06	5.16109e+06	5.29108e+06
M168T540	167.975	539.8	9	7.98852e+06	5.52693e+07	5.85332e+06	4.09133e+06	3.69192e+06	4.30188e+06	5.23908e+06	4.11995e+06	8.25315e+06	4.72046e+07	4.66107e+06	2.44944e+07	1.67244e+07	6.70033e+06	1.62339e+07	2.62416e+07	5.85732e+06	6.23764e+06	1.24863e+07	1.92639e+07	6.19117e+06	8.51201e+06	4.73514e+06	2.98395e+07	1.06142e+07	6.54326e+06	1.14798e+07	6.19827e+06	1.14706e+07	1.30197e+07	1.26286e+07
M168T557	167.975	556.8	9.3	3.28278e+06	9.39265e+06	7.88658e+06	1.00039e+07	9.39407e+06	4.03048e+06	1.35506e+07	9.53753e+06	1.33698e+07	4.27013e+06	8.15056e+06	1.31922e+07	5.25736e+06	3.51663e+06	1.00898e+07	7.58639e+06	3.71719e+06	2.94225e+06	1.14164e+07	5.28321e+06	7.25002e+06	8.35456e+06	6.26939e+06	6.13336e+06	3.45253e+06	4.74267e+06	6.70825e+06	6.10733e+06	6.06942e+06	6.60297e+06	7.51618e+06
M168T618	167.975	618.1	10.3	4.798e+06	3.08356e+06	3.36036e+06	2.39658e+06	3.14849e+06	2.43825e+06	5.89302e+06	4.53785e+06	3.01101e+06	5.57512e+06	2.9875e+06	3.99943e+06	4.8055e+06	6.66752e+06	3.079e+06	3.29019e+06	3.7057e+06	2.34112e+06	2.64143e+06	1.53971e+06	3.1299e+06	3.32479e+06	4.91962e+06	3.35178e+06	3.06145e+06	3.95308e+06	2.62457e+06	3.10794e+06	3.07251e+06	2.47387e+06	2.69566e+06
M168T62	167.976	62	1	1.3414e+08	1.61952e+08	1.40295e+08	1.44415e+08	1.39551e+08	1.19416e+08	1.83401e+08	1.33403e+08	1.27167e+08	1.14514e+08	1.51555e+08	1.3213e+08	1.07972e+08	1.27219e+08	1.19963e+08	1.23305e+08	1.34893e+08	1.07331e+08	1.28896e+08	1.3055e+08	1.27553e+08	1.26728e+08	1.13906e+08	1.2356e+08	1.19378e+08	1.19892e+08	1.19828e+08	1.19887e+08	1.23644e+08	1.19373e+08	1.19375e+08
M168T635	167.975	634.9	10.6	888977	2.47967e+06	1.29308e+06	5.03482e+06	3.20749e+06	2.87114e+06	2.23945e+06	4.82947e+06	4.4567e+06	2.09188e+06	1.80077e+06	1.86765e+06	3.13843e+06	2.15066e+06	6.2515e+06	3.34433e+06	2.05893e+06	2.40036e+06	3.3383e+06	3.72938e+06	1.15647e+06	4.42195e+06	3.31228e+06	4.27916e+06	2.89395e+06	1.88651e+06	3.70345e+06	3.25442e+06	3.18398e+06	3.08863e+06	2.86917e+06
M168T690	167.975	689.9	11.5	1.06385e+06	678772	322422	1.37534e+06	159995	118002	641562	883215	1.33216e+06	2.01852e+06	681719	225098	978619	2.22239e+06	1.8659e+06	1.37074e+06	1.82796e+06	1.48662e+06	2.13419e+06	1.35431e+06	3.09246e+06	620318	1.34163e+06	1.79977e+06	1.38381e+06	1.33159e+06	1.39843e+06	1.38632e+06	1.32861e+06	1.1227e+06	1.32849e+06
M168T72_1	167.988	71.8	1.2	605148	1.48708e+06	1.45886e+06	1.93874e+06	2.0397e+06	1.8313e+06	434411	1.72219e+06	2.20083e+06	1.99018e+06	2.0476e+06	2.07976e+06	1.80513e+06	2.18058e+06	2.04571e+06	2.19863e+06	697955	1.97207e+06	2.24561e+06	2.09157e+06	1.36363e+06	2.21261e+06	2.24164e+06	2.16208e+06	1.99274e+06	2.07523e+06	669377	1.96517e+06	2.25348e+06	2.16465e+06	2.15539e+06
M168T72_2	168.05	71.7	1.2	9.3417e+06	9.40521e+06	9.52295e+06	9.27933e+06	9.37562e+06	9.37015e+06	9.29044e+06	8.81926e+06	9.11226e+06	7.98341e+06	9.32227e+06	9.23728e+06	9.35583e+06	9.11176e+06	9.35852e+06	9.38026e+06	9.52897e+06	1.2198e+07	1.2833e+07	9.68751e+06	9.07534e+06	9.13456e+06	9.35141e+06	7.90006e+06	9.18437e+06	9.19094e+06	9.19117e+06	9.22014e+06	9.33171e+06	9.22092e+06	9.33182e+06
M168T720	167.975	720.3	12	3.21495e+06	1.41757e+06	2.6688e+06	2.45081e+06	1.75753e+06	1.51516e+06	1.93084e+06	2.69152e+06	3.70885e+06	3.51e+06	3.71391e+06	3.51308e+06	3.03822e+06	3.14186e+06	3.42073e+06	2.33309e+06	1.27795e+06	4.59836e+06	2.56176e+06	810666	1.57239e+06	2.25218e+06	2.78654e+06	4.83229e+06	2.03315e+06	1.76827e+06	2.05984e+06	2.20378e+06	2.29411e+06	2.2992e+06	1.41454e+06
M168T751	167.999	751	12.5	6.29635e+06	2.01867e+06	2.90182e+06	3.16539e+06	4.86426e+06	3.38542e+06	2.7841e+06	5.52539e+06	1.13913e+07	5.76109e+06	1.0274e+07	6.82312e+06	8.97513e+06	6.09378e+06	8.98462e+06	8.35193e+06	7.31904e+06	6.31653e+06	2.28179e+06	2.35882e+06	3.00548e+06	1.19312e+07	5.56133e+06	6.00257e+06	6.79824e+06	6.68463e+06	6.60395e+06	7.12268e+06	8.78145e+06	7.27258e+06	6.61776e+06
M168T77	168.077	76.7	1.3	4.13275e+06	4.32417e+06	3.72707e+06	2.3126e+06	3.82918e+06	3.33669e+06	5.23765e+06	3.56944e+06	4.76144e+06	526843	2.61947e+06	1.81715e+06	2.25691e+06	1.69034e+06	476698	465360	2.25972e+06	2.07382e+06	645731	4.5877e+06	3.64226e+06	3.0817e+06	1.35666e+06	3.3757e+06	1.50664e+06	1.71581e+06	2.07524e+06	1.84842e+06	2.03677e+06	1.89147e+06	2.11353e+06
M168T786	167.999	785.8	13.1	7.21479e+06	1.41933e+06	5.84627e+06	6.06616e+06	4.60499e+06	5.34281e+06	3.2986e+06	1.05831e+07	3.46223e+06	8.56122e+06	8.46278e+06	3.59788e+06	5.58136e+06	5.92054e+06	5.45371e+06	4.54462e+06	7.8922e+06	4.19029e+06	3.33148e+06	7.67134e+06	5.42115e+06	7.27935e+06	7.66234e+06	6.34442e+06	5.45947e+06	6.12396e+06	6.93435e+06	2.8578e+06	6.36026e+06	5.8922e+06	7.97275e+06
M168T807	167.998	806.5	13.4	6.15139e+06	1.10023e+06	4.2989e+06	7.23873e+06	4.8014e+06	1.12736e+06	4.4417e+06	1.32848e+06	6.47064e+06	4.89743e+06	5.26643e+06	4.17864e+06	1.96509e+06	6.48096e+06	6.42871e+06	6.31814e+06	6.5409e+06	1.61632e+06	5.77153e+06	3.62868e+06	7.35673e+06	3.79831e+06	1.32426e+06	1.14859e+07	4.30316e+06	3.84416e+06	2.67401e+06	3.92085e+06	4.05418e+06	4.06036e+06	3.53881e+06
M168T823	168.074	823.1	13.7	3.44603e+06	2.11742e+06	2.3862e+06	9.77411e+06	3.48984e+06	3.00361e+06	2.22522e+06	1.00798e+06	1.74182e+06	2.79459e+06	4.63754e+06	2.73811e+06	2.20772e+06	1.81264e+06	2.9896e+06	2.85515e+06	5.97316e+06	6.81436e+06	5.20051e+06	2.74411e+06	1.42969e+06	2.39938e+06	6.2067e+06	2.15497e+06	3.86556e+06	3.63347e+06	3.95181e+06	3.86975e+06	3.97214e+06	4.15178e+06	3.97243e+06
M168T92	168.044	91.5	1.5	1.20383e+07	8.10064e+06	1.63764e+06	1.2573e+07	1.21646e+07	2.18297e+07	1.68018e+07	2.33444e+07	1.18033e+07	1.47465e+06	9.41227e+06	9.26083e+06	1.31869e+07	175845	8.47427e+06	7.09575e+06	2.79703e+06	1.17805e+07	1.27548e+07	2.34311e+06	1.01624e+07	2.07825e+06	2.75571e+06	2.35455e+06	9.88163e+06	7.76498e+06	9.5899e+06	9.63331e+06	1.00291e+07	1.24653e+07	1.05355e+07
M169T100	168.99	99.8	1.7	2.07187e+06	966905	993551	2.1729e+06	1.48187e+06	1.49414e+06	1.21459e+06	2.40576e+06	1.22742e+06	989394	1.86023e+06	1.47915e+06	1.26955e+06	1.08566e+06	1.55777e+06	1.44955e+06	1.36536e+06	1.21646e+06	2.34994e+06	1.30042e+06	3.09295e+06	1.03644e+06	2.14954e+06	1.29726e+06	1.26559e+06	1.21554e+06	1.39592e+06	1.21593e+06	1.21662e+06	1.24668e+06	1.08431e+06
M169T115	168.961	114.5	1.9	2.99159e+06	876431	4.25586e+06	2.32605e+06	4.32115e+06	3.04487e+06	4.37404e+06	3.49139e+06	4.03385e+06	3.45155e+06	4.15776e+06	5.90962e+06	4.27916e+06	4.34842e+06	5.26867e+06	4.07155e+06	4.89599e+06	4.31279e+06	3.68476e+06	4.58718e+06	3.20556e+06	4.63248e+06	3.67361e+06	6.50122e+06	5.1181e+06	4.54703e+06	4.4899e+06	5.08218e+06	3.6503e+06	4.93494e+06	4.56784e+06
M169T122_1	169.035	121.5	2	3.33793e+06	9.5384e+06	4.38011e+06	1.50987e+07	1.00323e+07	1.20557e+07	2.47157e+07	2.56529e+06	5.10969e+06	4.84444e+06	8.91907e+06	4.50928e+06	5.14773e+06	3.57049e+07	5.1197e+06	1.31811e+07	3.40347e+06	1.11763e+07	1.99911e+07	7.89027e+06	1.26973e+07	1.29956e+07	2.24331e+07	1.15956e+07	1.03592e+07	1.10068e+07	8.88967e+06	1.20252e+07	1.18229e+07	1.02135e+07	6.82817e+06
M169T122_2	169.061	121.6	2	1.82759e+06	2.10837e+06	5.16525e+06	7.16338e+06	5.95258e+06	1.0505e+06	6.98317e+06	6.01071e+06	4.68534e+06	7.56121e+06	1.01346e+07	7.33375e+06	3.86645e+06	5.0827e+06	4.74146e+06	4.31011e+06	8.85597e+06	5.89009e+06	1.01311e+07	2.68827e+06	2.30656e+06	4.11649e+06	5.29756e+06	5.9961e+06	6.59134e+06	5.73774e+06	4.8701e+06	5.19479e+06	5.93088e+06	6.44856e+06	6.00902e+06
M169T126	168.981	125.7	2.1	1.32751e+06	1.32289e+07	5.11441e+06	1.11718e+06	1.60657e+06	8.71196e+06	9.21108e+06	9.17424e+06	4.70103e+06	1.52762e+06	1.98053e+06	5.38976e+06	434468	4.39286e+06	1.02115e+06	988281	8.38473e+06	533210	5.62217e+06	4.09923e+06	1.64487e+06	4.84541e+06	7.20602e+06	5.2229e+06	3.30068e+06	2.95701e+06	2.0123e+06	3.83657e+06	3.83088e+06	2.91316e+06	4.1362e+06
M169T137_1	168.982	137	2.3	8.08779e+06	6.37638e+06	7.56157e+06	8.60899e+06	1.23802e+07	7.45648e+06	7.15063e+06	7.48143e+06	7.25818e+06	7.95079e+06	7.83874e+06	8.33467e+06	1.0584e+07	5.55188e+06	6.27492e+06	6.50141e+06	1.10593e+07	7.1219e+06	1.33808e+07	8.52825e+06	7.76174e+06	6.17171e+06	6.34133e+06	5.71019e+06	7.56592e+06	7.64639e+06	7.64432e+06	6.98878e+06	7.64416e+06	7.646e+06	7.40246e+06
M169T137_2	169.036	136.9	2.3	1.94574e+06	1.02959e+07	9.12161e+06	5.56187e+06	1.45266e+07	1.82707e+06	2.96318e+06	7.88464e+06	6.445e+06	1.62877e+06	1.95831e+06	1.63436e+06	4.56109e+06	3.62837e+06	5.39559e+06	4.6571e+06	9.99905e+06	7.70301e+06	9.82634e+06	1.1759e+07	8.0795e+06	1.77113e+06	7.53317e+06	6.57177e+06	5.2275e+06	5.22802e+06	5.96356e+06	2.52086e+06	4.49188e+06	5.38991e+06	2.81745e+06
M169T326	169.061	326	5.4	891164	2.39838e+07	2.18639e+07	1.1205e+06	984273	1.10507e+06	2.16268e+07	2.22545e+07	1.1673e+06	1.07029e+06	2.3502e+07	2.15525e+07	2.21804e+07	2.32669e+07	2.14664e+07	2.31222e+07	2.14807e+07	2.18005e+07	842024	2.28286e+07	2.22671e+07	754837	2.1629e+07	2.21295e+07	470891	469984	529436	486150	485162	485856	469903
M169T350	169.097	349.6	5.8	1.14046e+06	2.16428e+06	4.66905e+06	3.69478e+06	2.73488e+06	4.19274e+06	3.0484e+06	1.21278e+06	1.7091e+07	2.47372e+07	1.75178e+07	1.87024e+07	2.44016e+07	2.15884e+07	2.84127e+07	2.58328e+07	1.14271e+06	2.45045e+07	3.06042e+06	4.29178e+06	7.11216e+06	1.17137e+07	1.51463e+07	1.43882e+07	1.07467e+07	1.10374e+07	1.12271e+07	9.87403e+06	1.16973e+07	1.1222e+07	1.12232e+07
M169T359	169.061	359.5	6	1.30857e+06	756853	1.33377e+06	1.34405e+06	1.62567e+06	747444	331160	895642	1.25218e+06	1.06544e+06	878040	914271	986666	797982	901250	838725	1.93007e+06	1.69704e+06	1.96308e+06	963648	255083	754624	1.14159e+06	1.23602e+06	932323	921084	632287	935813	703517	682451	931765
M169T36	168.976	35.8	0.6	4.44052e+06	3.93999e+06	4.57645e+06	3.40129e+06	2.13025e+06	3.10705e+06	4.58716e+06	3.52106e+06	3.74648e+06	3.13596e+06	7.15301e+06	3.0808e+06	6.33236e+06	4.93736e+06	5.32851e+06	2.8104e+06	2.82491e+06	4.8939e+06	2.64918e+06	2.27046e+06	3.22473e+06	2.58744e+06	3.50159e+06	2.64101e+06	2.90153e+06	2.9101e+06	3.33612e+06	3.0453e+06	2.96107e+06	4.33186e+06	3.09202e+06
M169T380	169.049	379.7	6.3	1.92371e+06	1.82914e+06	2.32329e+06	2.01621e+06	2.55159e+06	1.50507e+06	1.34769e+06	1.07824e+06	1.49981e+06	1.31217e+06	1.74062e+06	1.49798e+06	1.63672e+06	1.22754e+06	1.6313e+06	1.74693e+06	2.65491e+06	2.36845e+06	3.67351e+06	1.92682e+06	1.56166e+06	1.35046e+06	1.80298e+06	1.13643e+06	1.52538e+06	1.72441e+06	1.48973e+06	1.48938e+06	1.52058e+06	1.48843e+06	1.4898e+06
M169T417	169.061	416.8	6.9	1.2058e+06	253770	277319	1.18037e+06	299902	362905	58740.9	225091	362149	419889	154223	359365	612269	273053	260035	277695	331012	654075	616331	308857	103179	502642	428889	310607	390994	408757	390743	501543	390597	407418	407688
M169T464	169.076	464	7.7	31139.5	36944	35422.2	16502.1	43951.6	181990	73189.5	50749.4	643803	1.11722e+06	967296	1.35019e+06	723858	1.66344e+06	1.07971e+06	906041	71019.6	142035	441358	234333	101246	438416	490896	541432	201208	354466	400306	377754	380243	306566	367855
M169T526	169.133	526.1	8.8	188819	61005.6	86744.6	18671.1	618205	47754.8	243920	383566	39805.4	61090.9	63069.6	77372	15965.7	28255	354064	383942	52248.7	4.9583e+07	42178.5	188712	24816.3	87012.1	47604.4	961646	101063	286329	285252	272748	283362	263708	283365
M169T530	169.105	530.1	8.8	543703	273267	496992	383332	695495	354204	535365	666246	495980	415906	584248	510445	485827	613337	803134	785680	527895	423225	514061	761028	434450	488502	353345	576803	391859	447946	437377	436845	422132	421876	437513
M169T62	168.977	62.3	1	1.31719e+07	4.02686e+06	1.30058e+07	1.0851e+06	9.16764e+06	3.78905e+06	1.01651e+07	4.91647e+06	1.02538e+07	1.4456e+06	1.55587e+07	8.49764e+06	1.43074e+06	1.35183e+06	1.43241e+06	1.4083e+06	4.4771e+06	5.40285e+06	1.27382e+06	5.93809e+06	1.37196e+06	5.21361e+06	1.38702e+06	3.65593e+06	4.69146e+06	4.70376e+06	4.69214e+06	4.70171e+06	5.04702e+06	4.88089e+06	4.88571e+06
M169T666	169.061	665.8	11.1	6.9024e+06	6.02664e+06	6.91408e+06	4.1276e+06	5.94545e+06	7.19572e+06	1.34218e+07	8.04738e+06	6.97042e+06	8.91786e+06	8.83583e+06	8.15994e+06	7.15932e+06	6.2009e+06	8.99831e+06	1.05758e+07	1.08762e+07	4.2968e+06	5.084e+06	6.29615e+06	5.47582e+06	5.26806e+06	1.03269e+07	1.07213e+07	7.42143e+06	8.93501e+06	7.67309e+06	7.70243e+06	9.0497e+06	8.21403e+06	7.64363e+06
M169T72	169.046	71.7	1.2	1.79539e+07	1.67974e+07	1.99369e+07	1.66599e+07	1.7243e+07	1.68692e+07	1.92982e+07	1.78981e+07	1.79428e+07	1.76866e+07	1.70531e+07	1.65383e+07	1.71412e+07	1.76658e+07	1.68838e+07	1.75226e+07	1.58609e+07	1.69567e+07	1.58103e+07	1.74189e+07	1.64476e+07	1.72075e+07	1.63203e+07	1.52458e+07	1.73973e+07	1.74773e+07	1.73356e+07	1.73355e+07	1.74688e+07	1.72615e+07	1.73477e+07
M169T78	169.095	77.6	1.3	2.12421e+08	1.63772e+08	2.22676e+08	1.57336e+08	2.54076e+08	1.43157e+08	1.67569e+08	1.26004e+08	2.22124e+08	1.67672e+08	2.27517e+08	2.1011e+08	2.21131e+08	4.21693e+07	1.48219e+08	1.52609e+08	2.46178e+08	1.67732e+08	2.60761e+08	2.30477e+08	1.89127e+08	1.87028e+08	1.67177e+08	2.13743e+08	7.24539e+07	5.99041e+07	8.51256e+07	1.00924e+08	6.1098e+07	6.0575e+07	6.15631e+07
M170T101	170.081	100.8	1.7	1.42739e+06	454124	1.49268e+06	1.55304e+06	1.6544e+06	1.13758e+06	1.56319e+06	1.63048e+06	1.87e+06	1.92135e+06	2.18849e+06	1.84265e+06	1.78012e+06	2.0529e+06	1.98152e+06	2.02206e+06	2.54565e+06	2.28076e+06	2.62057e+06	2.17834e+06	2.34991e+06	1.87483e+06	1.77909e+06	1.89209e+06	1.67925e+06	1.67941e+06	1.67956e+06	1.68778e+06	1.70796e+06	1.68378e+06	1.7568e+06
M170T106	170.094	106.4	1.8	1.34593e+07	2.42641e+07	2.19924e+07	2.38818e+07	7.68597e+06	1.36451e+06	1.64429e+07	3.65278e+06	1.19364e+07	800326	2.45063e+06	1.46255e+07	1.15855e+06	1.04198e+07	1.24105e+06	1.31352e+06	1.48909e+07	859957	2.92947e+07	3.52785e+06	8.92537e+06	1.44604e+06	3.81663e+06	9.00729e+06	5.42759e+06	5.49267e+06	5.67175e+06	5.86274e+06	6.14748e+06	5.86356e+06	2.98525e+06
M170T122	170.065	121.9	2	1.42916e+07	1.54671e+07	1.40078e+07	1.28892e+07	1.4208e+07	1.45542e+07	1.66001e+07	1.4962e+07	1.58174e+07	1.49623e+07	1.7349e+07	1.49712e+07	2.01942e+07	1.47592e+07	1.98317e+07	1.98767e+07	1.39799e+07	1.81627e+07	1.50126e+07	1.53347e+07	1.58114e+07	1.65815e+07	1.69716e+07	1.59838e+07	1.42941e+07	1.30808e+07	1.42896e+07	1.4074e+07	1.42496e+07	1.73828e+07	1.37962e+07
M170T173	170.065	172.6	2.9	2.18993e+06	1.80139e+06	1.91654e+06	1.80003e+06	2.27901e+06	1.78077e+06	1.89706e+06	3.12019e+06	993862	1.99166e+06	1.94103e+06	2.2036e+06	1.64946e+06	906267	2.09631e+06	1.42621e+06	1.76242e+06	2.10584e+06	1.43932e+06	1.16382e+06	1.24616e+06	1.75278e+06	1.61574e+06	1.50511e+06	1.46475e+06	1.60711e+06	1.31091e+06	1.62823e+06	1.55103e+06	1.48577e+06	1.54747e+06
M170T33	169.974	33.5	0.6	1.0565e+07	7.14761e+06	9.42521e+06	2.09115e+07	1.37402e+07	7.7956e+06	4.34567e+06	5.78393e+06	1.56814e+07	1.11129e+07	2.01791e+07	8.5835e+06	2.06433e+07	8.07909e+06	9.62747e+06	9.22556e+06	7.55506e+06	4.92241e+06	1.22648e+07	7.88463e+06	9.93395e+06	9.34296e+06	8.09431e+06	1.20372e+07	6.82201e+06	6.61176e+06	6.32444e+06	6.60855e+06	7.04882e+06	6.84054e+06	4.96434e+06
M170T350	170.104	349.6	5.8	686169	676908	655156	824459	204022	795354	800670	1.15351e+06	793805	740991	864253	1.00613e+06	699127	564407	877038	744228	599883	847041	814966	987186	781664	821705	606316	449819	710290	592195	708939	739880	741041	758284	740590
M170T357	169.543	356.5	5.9	989047	141335	793185	1.01091e+06	487000	106837	901019	411359	958176	1.62852e+06	1.08988e+06	1.7074e+06	439951	2.29286e+06	1.1689e+06	1.28377e+06	1.29511e+06	159928	699137	590463	595858	597180	805423	856561	802758	716542	803387	819459	818925	803324	887847
M170T387	170.081	386.8	6.4	948241	2.90093e+06	3.37054e+06	2.69977e+06	2.39865e+06	453739	3.07594e+06	2.37649e+06	259357	1.76709e+06	1.39118e+06	416079	211966	1.73948e+06	1.26759e+06	1.48326e+06	905260	188400	2.48296e+06	3.07719e+06	827236	416219	432101	1.83702e+06	2.27117e+06	2.25968e+06	2.20963e+06	2.40063e+06	2.27138e+06	2.20917e+06	1.86039e+06
M170T397	170.06	397.2	6.6	2.48281e+06	2.55857e+06	2.51278e+06	3.87134e+06	1.91273e+06	2.78965e+06	2.31555e+06	2.41384e+06	3.83716e+06	6.06551e+06	6.22177e+06	5.10622e+06	3.30458e+06	6.69544e+06	4.9198e+06	4.4099e+06	3.81349e+06	5.35659e+06	3.24411e+06	4.01475e+06	4.04703e+06	7.2193e+06	5.69358e+06	5.99458e+06	3.87122e+06	3.86319e+06	3.86011e+06	4.32774e+06	4.47618e+06	3.86676e+06	3.88769e+06
M170T485	170.118	484.9	8.1	7.54353e+06	7.90342e+06	9.2519e+06	1.73729e+07	8.75306e+06	1.27601e+07	8.85433e+06	9.96775e+06	9.68119e+06	8.28156e+06	9.51448e+06	1.08475e+07	9.37218e+06	1.29181e+07	1.00678e+07	9.74861e+06	8.38324e+06	1.78721e+07	1.69565e+07	9.30511e+06	2.13202e+07	2.30552e+07	1.01763e+07	9.02425e+06	7.39931e+06	7.98883e+06	7.76205e+06	9.46119e+06	9.24663e+06	8.34874e+06	1.30443e+07
M170T565	169.52	565.1	9.4	429170	266408	506474	682111	187946	162473	182420	348473	192632	444866	452973	396656	173097	263159	498744	596003	266482	306683	323857	235122	488840	494726	322200	403094	445232	458148	458450	457875	423163	417179	457886
M170T592	170.154	592.5	9.9	453267	86852.2	254426	276026	185413	245033	407197	126179	325606	200992	438096	245261	159500	216516	140998	177494	181813	122209	176368	271288	177769	248801	125940	229305	251761	246166	293257	249772	258499	249863	255948
M170T666	170.064	665.9	11.1	569290	223951	695471	445080	442233	532240	532409	583636	667232	546940	726952	651184	639628	511930	564255	584509	466631	264772	480846	576607	488159	212261	462585	446342	584151	519763	521932	336792	520018	550757	549187
M170T699	170.117	698.8	11.6	3.80388e+06	769988	1.87445e+06	361947	2.26892e+06	1.43998e+06	2.20849e+06	2.4061e+06	1.91913e+06	830691	3.4739e+06	1.03347e+06	446824	791244	354406	645714	1.25207e+06	1.07615e+06	269867	420981	446085	1.85076e+06	514634	861619	1.22687e+06	1.14728e+06	1.00445e+06	1.14313e+06	1.37209e+06	1.11207e+06	1.22619e+06
M170T73	169.96	73.2	1.2	2.61382e+06	384453	1.20056e+06	6.00021e+06	547106	3.84179e+06	428620	613057	1.6846e+06	2.79062e+06	1.5743e+06	1.07394e+06	265047	1.37737e+06	1.26358e+06	1.29638e+06	1.39779e+06	1.2418e+06	1.07413e+07	1.29894e+06	1.23218e+06	2.16163e+06	1.43078e+06	930178	841907	508577	927261	960842	917090	956214	507137
M170T811	170.056	810.7	13.5	3.04574e+06	1.60724e+06	2.50234e+06	3.28178e+06	2.05103e+06	3.77544e+06	3.47469e+06	3.4108e+06	1.33681e+06	3.25264e+06	2.48996e+06	3.27793e+06	3.50019e+06	3.47261e+06	4.84797e+06	2.99323e+06	4.32008e+06	3.04446e+06	2.38519e+06	3.1142e+06	3.00439e+06	1.11152e+06	2.77297e+06	4.55377e+06	2.94239e+06	2.92902e+06	3.13643e+06	3.18353e+06	2.92833e+06	3.7016e+06	2.89173e+06
M170T824	170.096	823.6	13.7	2.15545e+07	2.46126e+07	1.32881e+07	4.6586e+07	1.10127e+07	4.68526e+06	5.88817e+06	7.16951e+06	1.71255e+07	4.22475e+07	1.66728e+07	2.99574e+07	4.21424e+07	4.34118e+07	3.89288e+07	2.23654e+07	5.76934e+07	2.53633e+07	5.1696e+07	3.31687e+07	2.79559e+07	1.05813e+07	4.05777e+07	2.95262e+07	2.00968e+07	2.32354e+07	2.08015e+07	2.10428e+07	2.01429e+07	2.593e+07	3.15261e+07
M170T94	170.032	94.4	1.6	1.6211e+07	4.08231e+07	1.09128e+07	4.3833e+07	1.35639e+07	2.60795e+07	1.46377e+07	1.06615e+07	3.22523e+07	1.90422e+07	2.78313e+07	1.70286e+07	3.27883e+07	1.26744e+07	1.73449e+07	1.79402e+07	1.20261e+07	4.38361e+07	1.76081e+07	1.04697e+07	1.11497e+07	2.12894e+07	4.54603e+07	3.20924e+07	2.25807e+07	2.25797e+07	2.2746e+07	2.29692e+07	2.33133e+07	2.27452e+07	2.1746e+07
M171T101	171.076	101.4	1.7	1.58887e+07	3.4736e+06	1.21668e+07	3.51692e+06	1.4862e+07	3.41524e+06	2.3472e+07	1.55335e+07	4.76005e+06	2.65085e+07	1.41154e+07	4.37405e+06	4.79702e+06	4.67772e+06	1.65109e+07	1.86043e+07	1.11828e+07	1.31776e+07	1.69707e+07	1.89176e+07	1.30366e+07	1.1391e+07	3.63651e+06	1.66828e+07	8.43073e+06	4.72547e+06	4.66618e+06	4.71304e+06	5.19833e+06	4.70042e+06	4.95486e+06
M171T108	171.113	108.4	1.8	4.34451e+06	3.57403e+06	3.9726e+06	4.30067e+06	4.10286e+06	2.88299e+06	3.93523e+06	3.45562e+06	1.50729e+06	1.22733e+06	1.74566e+06	1.06121e+06	599552	1.61941e+06	1.14973e+06	1.11574e+06	2.61744e+06	1.05318e+06	1.70947e+06	2.62653e+06	2.91109e+06	1.25984e+06	1.1635e+06	1.76383e+06	2.37662e+06	2.32646e+06	2.14047e+06	2.37195e+06	2.37337e+06	2.32815e+06	2.42029e+06
M171T124	171.149	124.4	2.1	1.18977e+06	912609	1.82609e+06	752554	933586	674760	1.22243e+06	1.76537e+06	4.84696e+07	9.36244e+07	7.19682e+07	8.20697e+07	3.30263e+07	8.8626e+07	6.54583e+07	7.49047e+07	1.15157e+06	5.1312e+06	5.77465e+06	1.80627e+06	1.62279e+06	4.59351e+07	2.82682e+07	3.05769e+07	2.31888e+07	2.14092e+07	2.33821e+07	2.42286e+07	2.48546e+07	2.32391e+07	2.74931e+07
M171T137	170.977	136.9	2.3	7.28082e+07	7.57394e+07	7.28756e+07	5.68239e+07	1.19568e+08	5.76905e+07	9.32358e+07	6.95909e+07	4.61073e+07	4.79953e+07	8.12312e+07	4.96687e+07	5.70249e+07	4.1458e+07	5.05122e+07	5.18833e+07	8.64451e+07	7.6298e+07	9.15355e+07	9.7997e+07	6.36385e+07	7.21341e+07	5.89228e+07	6.01383e+07	7.12191e+07	7.12751e+07	7.15247e+07	8.56756e+07	7.55171e+07	7.01743e+07	8.9313e+07
M171T356	170.562	356.5	5.9	1.87061e+06	558881	696488	601578	2.83449e+06	418543	381711	595867	455449	1.97638e+06	2.07352e+06	698499	609511	1.75233e+06	1.25142e+06	1.14625e+06	699503	1.81711e+06	925954	2.67744e+06	268473	646453	662627	2.78043e+06	1.83788e+06	1.84146e+06	1.70082e+06	1.6659e+06	1.93065e+06	1.77757e+06	1.91175e+06
M171T511	171.101	510.8	8.5	571808	669454	848014	2.24777e+06	1.59598e+06	1.30849e+06	1.82794e+06	914257	570836	1.11348e+06	2.04917e+06	1.53987e+06	1.72573e+06	1.52035e+06	1.5909e+06	952796	1.24336e+06	328047	1.9833e+06	1.02323e+06	1.0706e+06	739890	873434	1.18545e+06	1.05954e+06	822988	1.18082e+06	1.05956e+06	1.18118e+06	1.20052e+06	1.46505e+06
M171T616	171.149	616.2	10.3	2.45597e+07	2.50276e+07	2.54176e+07	3.75607e+07	1.9202e+07	2.87794e+07	3.2676e+07	1.32972e+07	1.62781e+07	2.9928e+07	2.39558e+07	2.91137e+07	2.15362e+07	4.24479e+07	4.08833e+07	2.61594e+07	1.80047e+07	2.78968e+07	2.43534e+07	2.31769e+07	3.05263e+07	9.86928e+06	3.42054e+07	3.47241e+07	2.34028e+07	2.33872e+07	2.5622e+07	2.05603e+07	2.09953e+07	2.38228e+07	2.05133e+07
M171T62	170.973	62.4	1	2.0022e+06	2.28663e+06	2.57234e+06	2.15318e+06	5.714e+06	2.78232e+06	2.77935e+06	2.0018e+06	1.44274e+06	2.1368e+06	2.6024e+06	4.20825e+06	3.31562e+06	2.22704e+06	3.19844e+06	3.25888e+06	2.48681e+06	405310	3.82755e+06	2.47642e+06	1.28298e+06	1.57537e+06	917390	1.52578e+06	2.05626e+06	2.05618e+06	2.06444e+06	2.05612e+06	1.97791e+06	2.02517e+06	2.00324e+06
M171T629	171.102	628.6	10.5	1.50109e+06	1.51761e+06	1.16948e+06	2.26354e+06	1.30386e+06	1.78583e+06	1.26515e+06	1.3831e+06	4.51356e+06	2.10891e+06	4.68333e+06	2.99206e+06	3.06004e+06	1.36411e+06	2.26408e+06	1.68299e+06	1.73907e+06	2.61537e+06	2.50449e+06	3.9251e+06	3.04806e+06	1.54017e+06	2.15871e+06	3.85397e+06	2.46811e+06	2.18796e+06	1.25617e+06	2.35138e+06	1.50027e+06	2.3471e+06	2.34847e+06
M171T65	171.148	65.3	1.1	2.50406e+07	2.00944e+07	1.70412e+07	2.33338e+07	1.71891e+07	2.36283e+07	3.17517e+07	3.34805e+07	2.62002e+07	2.35153e+07	2.17168e+07	2.87457e+07	2.04312e+07	2.79419e+07	2.13075e+07	3.61258e+07	1.64863e+07	2.98039e+07	3.37443e+07	4.24451e+07	2.13393e+07	2.46787e+07	2.27574e+07	3.8651e+07	2.03924e+07	2.88157e+07	1.98124e+07	2.2118e+07	2.19721e+07	2.19597e+07	1.7262e+07
M171T684	171.138	683.9	11.4	2.36229e+06	2.06293e+06	2.46147e+06	820138	2.32822e+06	1.72696e+06	2.95186e+06	2.44884e+06	2.60664e+06	2.02582e+06	2.44159e+06	2.40198e+06	2.65117e+06	2.51144e+06	2.01836e+06	2.30085e+06	2.68598e+06	2.36415e+06	1.74674e+06	2.79085e+06	2.47521e+06	1.53556e+06	1.57157e+06	2.37647e+06	2.05717e+06	2.05411e+06	2.38421e+06	2.05465e+06	2.26628e+06	2.05077e+06	2.05262e+06
M171T72	171.043	71.8	1.2	3.75886e+06	3.22096e+06	4.313e+06	2.85546e+06	2.9394e+06	1.9709e+06	949658	3.37131e+06	5.21091e+06	2.90928e+06	4.75905e+06	4.27732e+06	2.92366e+06	3.12436e+06	4.06444e+06	2.6644e+06	3.02221e+06	2.70503e+06	3.81922e+06	4.4972e+06	3.05882e+06	4.70471e+06	3.92767e+06	4.11943e+06	2.10597e+06	2.55712e+06	2.41112e+06	2.93231e+06	2.55285e+06	2.55099e+06	2.42638e+06
M171T773	171.138	773.3	12.9	2.59921e+06	3.86275e+06	2.01662e+06	4.57065e+06	3.38145e+06	1.93746e+06	3.44369e+06	3.73148e+06	1.54625e+06	6.09403e+06	1.86122e+06	5.15174e+06	4.8785e+06	3.09377e+06	4.35626e+06	4.4644e+06	2.6755e+06	2.92568e+06	6.25681e+06	1.84933e+06	2.65692e+06	2.97055e+06	2.9461e+06	1.73901e+06	2.35222e+06	2.37372e+06	2.62717e+06	2.69647e+06	3.02465e+06	2.20391e+06	2.37499e+06
M171T78	171.1	77.9	1.3	1.14329e+07	7.79725e+06	1.04863e+07	1.17942e+07	9.46922e+06	4.12701e+06	9.19314e+06	1.2151e+07	9.92621e+06	7.29205e+06	8.89681e+06	8.41774e+06	7.62073e+06	8.0872e+06	6.89706e+06	5.98687e+06	4.55606e+06	1.0364e+07	7.56385e+06	1.0528e+07	7.63107e+06	9.07613e+06	9.56224e+06	6.68683e+06	7.86835e+06	7.45813e+06	7.06931e+06	4.99579e+06	7.8932e+06	7.62015e+06	7.89579e+06
M171T84	171.017	83.5	1.4	1.37318e+06	7.30197e+06	1.01742e+07	2.77407e+07	6.29371e+06	1.51233e+06	1.44e+07	1.00541e+07	9.3194e+06	9.24162e+06	9.18249e+06	1.02751e+07	2.34199e+06	1.02941e+07	6.89038e+06	6.23531e+06	8.04839e+06	2.31464e+06	9.20786e+06	1.5724e+06	1.83429e+06	7.85887e+06	6.34072e+06	1.01502e+07	1.50202e+06	1.504e+06	1.50448e+06	1.54763e+06	1.60881e+06	1.5567e+06	1.62952e+06
M172T100	172.072	99.6	1.7	1.6389e+06	1.64726e+06	1.90263e+06	1.6254e+06	1.82222e+06	1.34336e+06	1.17851e+06	1.33306e+06	1.30808e+06	1.17782e+06	1.60668e+06	1.50637e+06	1.63664e+06	1.23535e+06	1.40417e+06	1.49306e+06	1.84665e+06	2.49712e+06	2.71223e+06	1.85749e+06	1.41443e+06	1.4039e+06	1.60541e+06	1.09919e+06	1.64539e+06	1.60885e+06	1.58932e+06	1.64025e+06	1.71435e+06	1.72803e+06	1.61434e+06
M172T116	172.097	116	1.9	2.64652e+07	2.08511e+07	2.03432e+07	2.17086e+07	1.42093e+07	2.35696e+07	2.03173e+07	2.12363e+07	4.47225e+07	4.79398e+07	4.81838e+07	4.45926e+07	2.98515e+07	4.76248e+07	4.11992e+07	4.32795e+07	2.70633e+07	3.76259e+07	3.30017e+07	2.28961e+07	2.59485e+07	4.42446e+07	3.78276e+07	3.95842e+07	3.05758e+07	3.01077e+07	2.9746e+07	2.81483e+07	3.09888e+07	3.0643e+07	3.01137e+07
M172T126_1	171.977	125.9	2.1	223572	843355	201753	278589	212067	145635	205167	220375	1.01778e+06	2.29765e+06	3.53133e+06	479484	616439	441334	2.07337e+06	642687	373559	1.30511e+06	532052	3.03429e+06	947592	1.08147e+06	1.02063e+06	2.21486e+06	1.50135e+06	1.79598e+06	1.70705e+06	1.51875e+06	1.85924e+06	1.27115e+06	778341
M172T126_2	172.153	125.6	2.1	1.28176e+06	1.41626e+06	1.26991e+06	1.40139e+06	1.58021e+06	242498	347795	1.04856e+06	257932	1.07444e+06	1.83038e+06	1.00614e+06	1.96662e+06	1.30991e+06	1.62616e+06	1.33536e+06	2.47585e+06	1.56309e+06	2.99676e+06	1.86161e+06	1.59869e+06	1.35199e+06	1.31875e+06	1.39731e+06	1.396e+06	1.49407e+06	1.49234e+06	1.50322e+06	1.39148e+06	1.39689e+06	730916
M172T137	171.977	136.9	2.3	9.96976e+06	5.72318e+06	5.68665e+06	1.10999e+07	7.014e+06	2.9802e+06	4.87646e+06	2.47222e+06	2.99238e+06	2.98292e+06	2.06438e+06	1.90734e+06	1.66278e+06	1.48494e+06	2.88197e+06	2.75032e+06	5.51663e+06	3.20222e+06	4.70435e+06	4.37535e+06	3.53203e+06	1.43232e+06	2.0154e+06	4.11295e+06	3.70469e+06	3.44176e+06	4.06068e+06	4.04652e+06	3.72553e+06	5.29999e+06	4.0371e+06
M172T174	171.534	173.7	2.9	285400	349187	275863	76244.6	26623.6	385251	53790.9	66246	370396	410284	380569	55182.1	234187	55373.5	326412	337154	62590.4	398624	227641	289384	315060	344799	585130	342983	197117	222405	191386	215291	86932.6	163190	159513
M172T314	172.06	313.9	5.2	4.76425e+06	4.35616e+06	4.489e+06	4.89064e+06	4.33184e+06	5.23782e+06	3.83698e+06	3.63415e+06	4.54574e+06	4.77653e+06	3.47426e+06	4.31793e+06	4.18103e+06	3.92516e+06	4.62005e+06	4.77724e+06	5.05422e+06	4.88847e+06	3.55299e+06	3.89819e+06	4.9283e+06	3.55791e+06	4.43587e+06	4.5355e+06	3.90514e+06	3.37412e+06	4.0291e+06	3.90806e+06	4.54006e+06	4.14612e+06	4.02738e+06
M172T33	171.994	32.6	0.5	2.40571e+06	3.28762e+06	2.61008e+06	2.81132e+06	2.51764e+06	3.4024e+06	1.69937e+06	3.61334e+06	2.17941e+06	1.64841e+06	2.24528e+06	1.67482e+06	1.72659e+06	1.967e+06	1.68084e+06	1.83436e+06	2.13039e+06	1.44197e+06	2.29491e+06	2.10578e+06	1.99072e+06	1.79448e+06	2.14879e+06	1.9822e+06	2.25378e+06	2.81187e+06	2.30898e+06	2.08286e+06	2.25575e+06	2.29265e+06	2.31448e+06
M172T343	172.097	343.3	5.7	3.14327e+06	3.03956e+06	4.65952e+06	8.13027e+06	6.75484e+06	2.25019e+06	7.78718e+06	2.21821e+06	2.46547e+06	6.27217e+06	6.74883e+06	5.00778e+06	1.98297e+06	4.71641e+06	8.5242e+06	9.10498e+06	1.93105e+06	5.3458e+06	2.15326e+06	2.7317e+06	2.95357e+06	1.9197e+06	9.48437e+06	1.77261e+06	4.66757e+06	4.19299e+06	3.0155e+06	4.2212e+06	6.13263e+06	4.70465e+06	4.66969e+06
M172T436	172.097	435.7	7.3	1.00891e+06	1.77879e+06	72397.4	559056	2.55135e+06	65218.3	1.43588e+06	312856	1.13181e+06	789297	1.48152e+06	1.67177e+06	2.2613e+06	564038	100776	88285.6	2.58374e+06	1.17866e+06	1.44817e+06	814572	444374	139785	1.96456e+06	420510	1.65037e+06	1.05495e+06	1.58276e+06	1.79493e+06	1.77767e+06	1.76866e+06	1.76339e+06
M172T486	172.043	485.6	8.1	1.31272e+06	999035	3.00018e+06	2.26507e+06	1.99761e+06	2.0324e+06	1.33432e+06	2.36072e+06	1.26777e+06	544043	1.36828e+06	714173	859927	816864	2.56919e+06	970974	480188	2.46022e+06	644671	1.41666e+06	516564	2.30896e+06	1.71307e+06	1.59281e+06	1.20069e+06	1.94114e+06	1.55891e+06	1.38237e+06	1.79442e+06	1.03445e+06	1.28894e+06
M172T517	172.133	516.5	8.6	1.12542e+08	1.35139e+08	4.59075e+07	3.37826e+07	1.30338e+07	2.88177e+07	8.72104e+06	1.54614e+07	1.28464e+07	1.78371e+08	5.85476e+06	1.72252e+07	1.64042e+08	1.48972e+07	7.52322e+07	3.90418e+07	4.12045e+07	3.22221e+06	2.76983e+08	2.9496e+08	1.17755e+07	9.02999e+06	7.53663e+06	1.3733e+07	2.65453e+07	6.2191e+07	5.5531e+07	7.38332e+07	5.80158e+07	5.45668e+07	8.21283e+07
M172T616	172.153	616.2	10.3	2.53556e+06	1.52563e+06	1.8217e+06	3.21568e+06	2.67614e+06	2.84642e+06	3.46499e+06	1.87281e+06	2.19369e+06	2.18332e+06	1.68192e+06	2.05012e+06	2.32745e+06	3.01368e+06	2.43976e+06	3.00509e+06	2.0569e+06	3.85655e+06	2.5183e+06	3.37429e+06	1.48431e+06	3.08931e+06	1.59755e+06	1.95886e+06	2.76242e+06	2.2544e+06	2.41192e+06	2.23958e+06	2.06223e+06	2.45726e+06	2.60202e+06
M172T633	172.169	632.8	10.5	653432	373098	173032	1.20438e+06	373450	301827	443452	282626	171423	1.32046e+06	225769	256898	251573	222562	348326	403039	265166	341841	398632	1.39061e+06	259212	198541	492795	236119	424220	360373	372137	351663	456517	424163	278041
M172T635	172.133	635.1	10.6	336994	504446	680480	141652	627778	675671	492793	863655	349853	496875	427924	647452	482694	187907	437955	604041	58524.5	57462.8	168016	257553	58821	943430	579029	14309	434266	439102	309616	432362	465003	452988	554129
M172T66	171.993	66.4	1.1	8.23489e+06	7.15234e+06	8.41281e+06	7.97684e+06	7.81558e+06	7.76364e+06	6.96006e+06	7.63378e+06	7.45103e+06	7.16847e+06	7.59818e+06	7.68128e+06	8.48727e+06	6.93674e+06	6.57501e+06	7.49589e+06	8.34126e+06	8.77424e+06	9.76228e+06	7.44222e+06	7.11889e+06	7.6533e+06	8.51233e+06	7.11327e+06	7.46383e+06	7.41934e+06	6.85175e+06	7.35709e+06	7.35862e+06	8.01453e+06	7.37825e+06
M172T706	172.206	705.7	11.8	440993	356087	457173	366551	553003	394962	400443	531458	94234.8	229920	470350	396118	270609	491010	400336	507308	538057	637906	214027	593160	250131	590854	477976	300853	405178	432230	432434	358425	432005	278924	499257
M172T714	172.133	714.2	11.9	1.79275e+06	2.22531e+06	1.57032e+06	2.15152e+06	2.3432e+06	1.61852e+06	697781	2.05447e+06	2.26472e+06	2.98107e+06	1.66088e+06	3.15647e+06	1.64189e+06	2.48133e+06	862199	1.61994e+06	1.62538e+06	2.13283e+06	2.78877e+06	1.93898e+06	1.38152e+06	1.61278e+06	1.83822e+06	2.93093e+06	1.96486e+06	2.18142e+06	1.97059e+06	2.2051e+06	2.18004e+06	1.91675e+06	2.21431e+06
M172T725	172.17	724.6	12.1	1.00839e+06	442413	461571	389667	1.22185e+06	552688	1.39359e+06	1.46981e+06	1.51666e+06	1.02212e+06	985688	1.3667e+06	1.40279e+06	398832	470645	1.1533e+06	686232	680494	1.00629e+06	358763	279342	550132	1.20653e+06	491676	971367	1.01502e+06	1.01515e+06	971360	1.01508e+06	650181	1.10608e+06
M172T73	171.959	73.1	1.2	632640	531054	764423	686186	769975	493930	470100	572700	460243	531628	656899	563034	650947	579789	600950	592403	767842	778186	960896	691952	625020	436635	796083	564828	566068	557004	556642	556851	486749	566139	570313
M172T780	172.17	779.6	13	2.71099e+07	2.00511e+07	1.36926e+07	1.81416e+07	8.76806e+06	1.00385e+07	2.71876e+07	1.10425e+07	2.23652e+07	5.55781e+07	2.92899e+07	7.6326e+06	3.95789e+06	6.50452e+06	4.58546e+06	4.6119e+06	2.49521e+07	4.44096e+06	1.59068e+07	8.52787e+06	2.93475e+07	1.83657e+07	5.10143e+06	3.12597e+07	1.94205e+07	1.97531e+07	1.90618e+07	1.94104e+07	1.10415e+07	1.87011e+07	1.59826e+07
M172T815	172.115	815.5	13.6	1.59456e+07	2.75566e+07	1.19341e+07	2.18834e+07	4.24142e+06	4.59374e+06	1.38387e+07	2.07029e+07	7.23329e+06	8.25185e+06	1.36133e+07	1.53858e+07	1.79094e+06	9.81689e+06	1.31911e+07	1.07208e+07	7.15173e+06	1.02472e+06	2.78037e+06	1.62426e+07	5.9701e+06	5.96316e+06	3.57007e+06	4.64497e+06	8.6111e+06	8.64683e+06	9.80033e+06	8.06509e+06	7.97836e+06	7.9882e+06	5.45251e+06
M172T83	172.058	82.9	1.4	2.35017e+06	2.6767e+06	2.61523e+06	2.47425e+06	2.57996e+06	2.67554e+06	3.18947e+06	2.33769e+06	2.29384e+06	3.02011e+06	2.40964e+06	2.57055e+06	2.67166e+06	3.34298e+06	3.38608e+06	3.47911e+06	1.56386e+06	3.03258e+06	2.75419e+06	1.50658e+06	2.10552e+06	1.83992e+06	1.60464e+06	3.33562e+06	1.60729e+06	2.00755e+06	2.00675e+06	2.01208e+06	1.55358e+06	2.01359e+06	1.93828e+06
M173T112	173.129	111.6	1.9	964051	165746	130817	1.21078e+06	403789	283666	177409	175512	540881	883782	800546	643733	429365	617422	539364	912633	478060	989523	1.06868e+06	482612	530496	629189	916699	198318	414203	307773	533147	330215	335277	467721	326179
M173T121	173.092	121	2	2.44739e+06	1.76942e+06	2.22947e+06	1.80061e+06	2.23612e+06	1.91326e+06	2.45547e+06	2.76257e+06	746308	1.88913e+06	1.95596e+06	1.97477e+06	1.77384e+06	780225	3.47171e+06	2.1064e+06	1.41126e+06	1.61489e+06	1.97042e+06	2.48425e+06	1.6587e+06	1.70706e+06	1.63763e+06	3.08008e+06	2.02107e+06	1.72325e+06	1.90916e+06	2.02703e+06	2.02042e+06	2.39604e+06	1.91632e+06
M173T137	172.974	136.8	2.3	4.50552e+06	3.3319e+06	3.88625e+06	3.67197e+06	5.43633e+06	3.60036e+06	5.26907e+06	4.69549e+06	3.84178e+06	3.7666e+06	3.97307e+06	3.85698e+06	4.21004e+06	3.59712e+06	4.74009e+06	4.76729e+06	4.66824e+06	4.65971e+06	5.10411e+06	4.31636e+06	3.79849e+06	4.81795e+06	4.26169e+06	3.81963e+06	4.26181e+06	4.64071e+06	4.86395e+06	4.46179e+06	4.4611e+06	4.34254e+06	4.54795e+06
M173T33	172.977	32.6	0.5	2.02152e+06	1.33458e+07	1.36833e+07	6.47248e+06	1.26439e+07	1.60664e+07	2.35599e+06	1.08583e+07	1.27673e+07	1.84183e+06	1.93458e+06	1.96205e+06	1.61518e+06	1.89157e+06	1.87949e+06	1.92953e+06	1.08078e+07	1.75886e+06	1.53719e+07	2.24991e+07	1.87646e+06	2.09808e+06	1.8653e+06	1.98101e+06	6.23312e+06	6.21969e+06	5.53779e+06	7.46193e+06	7.44373e+06	7.56089e+06	6.18262e+06
M173T366	173.092	365.5	6.1	200857	271044	161575	207742	165412	146081	245393	193668	216512	338338	247488	252808	205738	364875	276349	265669	174124	259881	220049	296450	153733	166790	188161	213174	211461	214238	175700	216363	216182	216276	216183
M173T517_1	173.117	516.8	8.6	4.78617e+06	5.32451e+06	2.96856e+06	1.69042e+06	736909	820553	4.85922e+06	5.72216e+06	1.98977e+06	4.56343e+06	3.86913e+06	2.0132e+06	4.37084e+06	4.66389e+06	3.53741e+06	2.1527e+06	3.88047e+06	5.04589e+06	2.92249e+06	6.67166e+06	3.91151e+06	1.91269e+06	3.36231e+06	4.93498e+06	2.7905e+06	3.25637e+06	4.0798e+06	3.71651e+06	3.26774e+06	5.18318e+06	3.37058e+06
M173T517_2	173.137	516.5	8.6	3.79121e+06	1.96874e+06	6.24629e+06	1.99586e+06	5.17911e+06	7.80501e+06	5.96089e+06	4.54141e+06	3.95329e+06	2.44098e+06	3.29162e+06	6.80013e+06	7.56455e+06	5.55764e+06	6.13167e+06	5.33327e+06	4.18386e+06	2.65485e+06	4.1962e+06	5.933e+06	2.37765e+06	3.7014e+06	2.72954e+06	4.42129e+06	5.10551e+06	5.33011e+06	5.14683e+06	5.3219e+06	5.60917e+06	4.09767e+06	5.14515e+06
M173T554	173.085	553.9	9.2	1.63933e+06	807145	1.03396e+06	877415	1.04398e+06	616015	1.28344e+06	1.5991e+06	1.75459e+06	2.66402e+06	1.82694e+06	1.84582e+06	1.83403e+06	2.0368e+06	2.13521e+06	1.7481e+06	1.84481e+06	2.29734e+06	1.92081e+06	1.1584e+06	1.79896e+06	1.28902e+06	1.59032e+06	2.54133e+06	1.50914e+06	1.50881e+06	1.50673e+06	1.10458e+06	1.51031e+06	1.16184e+06	1.44738e+06
M173T558	173.071	558.2	9.3	559748	598301	475009	679833	811713	678160	732182	770710	559708	317081	1.02748e+06	403528	230421	567863	628421	1.00732e+06	383385	462633	1.03593e+06	658261	638356	456349	271665	837912	620565	547901	632838	624221	549331	536526	667403
M173T599	173.141	598.6	10	30792.7	74683.9	80944.4	35182.6	72500.1	77841	111878	99359.1	63784.8	64344.1	72240.8	69017.7	152826	32583	55863.7	52853	65445.6	119651	59888.4	69740.7	66771.2	74185.6	56810.1	148474	64377	64115.2	62426.8	69310.7	65536.1	69187.8	67879
M173T780	173.173	779.6	13	1.58086e+06	738701	1.33253e+06	1.98174e+06	1.67056e+06	1.96275e+06	2.87826e+06	2.44042e+06	2.54064e+06	1.82686e+06	3.05006e+06	1.63242e+06	794431	1.30544e+06	1.59041e+06	940802	2.14221e+06	1.09751e+06	1.56547e+06	1.60672e+06	1.05401e+06	1.949e+06	1.05159e+06	1.03568e+06	1.77475e+06	1.60294e+06	1.92153e+06	1.74839e+06	1.63806e+06	1.61767e+06	1.78041e+06
M173T87	173.042	87	1.4	2.44307e+06	613863	2.38356e+06	1.83583e+06	2.06264e+06	1.96684e+06	2.95552e+06	2.8581e+06	2.39558e+06	2.76908e+06	2.54039e+06	2.68527e+06	2.1627e+06	2.10125e+06	2.39467e+06	2.16682e+06	2.78295e+06	2.11323e+06	2.17947e+06	2.16654e+06	622779	3.37944e+06	2.16711e+06	2.38963e+06	1.89243e+06	925888	1.89629e+06	1.98758e+06	2.00823e+06	2.01097e+06	2.0071e+06
M173T89	173.021	89.1	1.5	6.68648e+06	2.45198e+06	5.52648e+06	1.18662e+07	9.76077e+06	2.52583e+06	7.67253e+06	2.03922e+06	2.70274e+06	1.50534e+06	2.49826e+06	1.28432e+06	2.10816e+06	1.72677e+06	1.42544e+06	1.32725e+06	6.26303e+06	2.14921e+06	5.82282e+06	8.83992e+06	5.18482e+06	2.57576e+06	2.1844e+06	2.73877e+06	4.57242e+06	5.23157e+06	5.23691e+06	5.24273e+06	5.46466e+06	5.37175e+06	5.2408e+06
M174T115	174.076	114.9	1.9	2.17134e+06	2.64532e+06	948320	981171	1.41021e+06	2.9423e+06	994792	2.87716e+06	1.68424e+06	2.5919e+06	1.47399e+06	2.48765e+06	2.63185e+06	2.13966e+06	2.60745e+06	3.30169e+06	2.7983e+06	3.13837e+06	2.50754e+06	137287	2.61496e+06	3.01742e+06	2.63294e+06	776331	2.93714e+06	2.8319e+06	2.89704e+06	2.92475e+06	2.96244e+06	1.51449e+06	2.60475e+06
M174T356	174.113	356.4	5.9	1.10961e+06	933069	931073	1.48561e+06	1.1842e+06	1.13534e+06	1.69042e+06	1.16436e+06	1.02138e+06	1.06438e+06	1.12584e+06	1.43161e+06	1.00806e+06	613655	1.03415e+06	1.24124e+06	1.11779e+06	1.74004e+06	1.72571e+06	1.08729e+06	1.08598e+06	957310	1.57449e+06	1.3939e+06	948578	1.00988e+06	961079	943902	1.31572e+06	965233	964932
M174T418	174.058	418	7	1.05887e+06	1.58562e+06	1.11096e+06	671569	1.24755e+06	158987	1.30293e+06	1.36513e+06	959767	1.50729e+06	1.96967e+06	1.58218e+06	1.25654e+06	1.08579e+06	1.47336e+06	816686	699170	702607	1.50544e+06	2.38763e+06	1.1743e+06	996717	846143	1.22355e+06	1.0145e+06	824208	1.01287e+06	1.1483e+06	1.02487e+06	1.02705e+06	1.22837e+06
M174T450	174.055	449.6	7.5	1.70446e+06	4.11862e+06	2.3176e+06	4.23086e+06	1.40017e+06	1.80692e+06	1.62405e+06	2.73681e+06	753323	898781	1.17264e+06	1.37103e+06	1.69655e+06	808875	1.12592e+06	981330	3.08636e+06	607110	885127	1.84394e+06	617863	821822	1.5894e+06	1.43507e+06	951522	964353	961447	968848	488261	964331	436168
M174T454	174.002	454	7.6	2327.68	35901	33077.9	281950	1.17229e+06	178239	31125.2	151882	178117	17624.6	27270.4	137751	241953	21931.2	221945	77852.6	14648.6	57633.8	71287.5	37368	161530	11201.2	97749	313551	178480	180742	187504	123007	158284	136982	153695
M174T492	174.149	492.3	8.2	463216	496708	81412.8	18492.3	596284	706482	393897	387449	394749	368456	585450	283916	379278	104654	152892	554558	362183	691859	198443	400235	26725.4	194602	323046	115691	359219	194474	217511	215305	362506	217132	268369
M174T500	174.113	500.2	8.3	592284	3.51369e+06	1.27285e+06	845112	405850	1.11404e+06	1.30163e+06	1.24844e+06	7.21198e+06	8.20888e+06	7.96979e+06	7.7699e+06	6.48108e+06	1.37059e+06	402144	8.4684e+06	1.17261e+06	1.17888e+06	7.24358e+06	1.008e+06	1.18863e+06	1.26658e+06	1.11022e+06	1.26984e+06	1.02876e+06	1.02858e+06	1.02827e+06	1.02921e+06	1.12582e+06	492691	902231
M174T539	174.185	538.6	9	1.70029e+06	2.09367e+06	1.02752e+06	1.33441e+06	772894	2.38446e+06	1.63207e+06	2.3342e+06	2.09527e+06	4.01987e+06	3.01196e+06	3.04133e+06	2.66255e+06	2.73284e+06	1.04483e+06	1.78888e+06	907146	2.32423e+06	1.81245e+06	2.07054e+06	1.6805e+06	1.98857e+06	1.64561e+06	2.97467e+06	1.73915e+06	1.80866e+06	1.97025e+06	1.96254e+06	1.9615e+06	2.00286e+06	1.41963e+06
M174T565	174.059	565	9.4	255341	110986	132318	220990	330508	131100	217832	193396	607780	352434	365435	711145	562738	278122	277444	382174	331603	935324	418158	248068	133155	141807	334739	477021	307490	318014	318385	314664	318486	306700	306557
M174T578	174.185	577.7	9.6	1.60429e+06	6.36512e+06	5.31601e+06	1.43713e+06	2.0919e+06	1.97687e+06	5.97534e+06	5.91156e+06	2.2665e+06	2.57264e+06	5.41824e+06	6.26049e+06	4.11309e+06	4.08332e+06	4.78555e+06	4.21148e+06	5.24201e+06	5.27221e+06	2.19285e+06	3.31245e+06	2.50871e+06	2.59118e+06	3.61235e+06	4.70663e+06	4.28014e+06	4.14913e+06	4.27996e+06	4.08581e+06	4.27634e+06	4.27554e+06	2.23525e+06
M174T72	174.025	71.8	1.2	2.68037e+06	2.54198e+06	2.24302e+06	1.98042e+06	3.74024e+06	2.38946e+06	3.31432e+06	2.0773e+06	3.83228e+06	3.24515e+06	3.35306e+06	3.07332e+06	1.65633e+06	2.72692e+06	1.28185e+06	2.35468e+06	3.21371e+06	2.06639e+06	4.34547e+06	3.09352e+06	2.70811e+06	3.45499e+06	2.26821e+06	2.87488e+06	2.00256e+06	2.41818e+06	1.84205e+06	2.41469e+06	2.41032e+06	2.5504e+06	2.32862e+06
M174T75	174.069	75.2	1.3	350092	349298	677156	390414	314922	426683	370002	445724	514708	392294	669882	587051	759928	671258	647226	279273	417925	318420	387722	625472	612131	434755	284023	619203	506294	558280	539967	541865	539546	486504	502649
M174T824	174.128	824.3	13.7	1.46795e+07	9.53001e+06	2.1617e+07	599743	9.0665e+06	1.24846e+07	2.03517e+07	1.38178e+07	2.22991e+07	1.74274e+06	2.6928e+07	8.54158e+06	4.92604e+06	2.08434e+06	3.04176e+06	2.5249e+06	3.00047e+06	3.34017e+06	755635	2.84241e+06	4.98385e+06	7.99042e+06	1.58997e+06	3.75991e+06	8.1475e+06	6.59616e+06	1.13415e+07	7.72753e+06	8.1383e+06	7.71083e+06	7.73727e+06
M174T98	174.076	98.2	1.6	362269	1.98542e+06	316683	1.63021e+06	472023	2.3448e+06	430266	266848	3.1002e+06	2.46823e+06	4.36852e+06	2.60113e+06	2.28196e+06	409218	1.58884e+06	2.38409e+06	302191	1.2806e+06	2.32699e+06	258308	269695	3.36094e+06	2.22762e+06	2.54219e+06	1.21827e+06	1.33639e+06	1.02507e+06	1.22053e+06	1.58417e+06	1.49924e+06	725621
M175T102	174.972	102.1	1.7	89653.7	396419	347821	1.51266e+06	40656.4	38529.3	1.14983e+06	2.39507e+06	896686	4.63655e+06	1.33821e+06	1.85261e+06	84866.6	7.3245e+06	2.26613e+06	2.04713e+06	4.79025e+06	1.04535e+06	1.45944e+06	2.02697e+06	4.67262e+06	3.44169e+06	1.46335e+06	7.98895e+06	1.94786e+06	1.95094e+06	1.94964e+06	2.00766e+06	2.19902e+06	1.95081e+06	2.00738e+06
M175T103_1	175.071	103.4	1.7	1.58128e+07	1.2692e+07	1.89552e+07	1.78932e+07	1.63208e+07	1.60635e+07	1.97253e+07	1.84333e+07	1.85277e+07	1.45535e+07	1.91704e+07	1.39901e+07	1.47312e+07	1.63399e+07	1.79596e+07	1.5628e+07	1.68284e+07	1.72661e+07	1.54187e+07	1.8703e+07	1.385e+07	1.82038e+07	1.29471e+07	1.37506e+07	1.49568e+07	1.4271e+07	1.37611e+07	1.49509e+07	1.49405e+07	1.56217e+07	1.47919e+07
M175T103_2	175.108	103.4	1.7	2.10743e+07	2.14398e+07	1.99219e+07	2.10442e+07	2.22495e+07	1.99066e+07	2.00744e+07	2.14739e+07	2.50649e+07	1.94365e+07	2.12874e+07	2.00561e+07	2.05817e+07	2.041e+07	1.95873e+07	2.05949e+07	1.99575e+07	2.44561e+07	2.42503e+07	2.68281e+07	2.09506e+07	2.77326e+07	1.96919e+07	1.89984e+07	2.08749e+07	2.15338e+07	2.1707e+07	2.10647e+07	2.21093e+07	2.20738e+07	2.27662e+07
M175T113	175.071	112.7	1.9	1.39558e+07	1.71886e+07	1.2766e+07	1.69516e+07	1.78503e+07	1.30128e+07	1.57806e+07	2.07959e+07	1.51106e+07	1.07174e+07	2.84149e+07	8.72542e+07	1.61187e+07	3.12865e+07	1.86656e+07	1.66762e+07	5.91802e+06	1.87693e+07	8.34046e+06	1.67796e+07	1.41571e+07	1.83061e+07	991160	1.11986e+07	1.43214e+07	1.35664e+07	1.74801e+07	1.35878e+07	1.35401e+07	1.35838e+07	1.3505e+07
M175T122	175.053	122.3	2	2.96266e+06	5.56287e+06	4.50046e+06	5.11963e+06	4.5113e+06	2.46876e+06	4.74123e+06	4.50928e+06	4.6113e+06	3.34768e+06	4.88015e+06	657818	4.40628e+06	4.25955e+06	5.28997e+06	4.19501e+06	3.64274e+06	3.58215e+06	4.60018e+06	3.77767e+06	2.78162e+06	4.56474e+06	3.86907e+06	5.49947e+06	4.53955e+06	4.89076e+06	4.88737e+06	4.8841e+06	4.90729e+06	4.40082e+06	4.67711e+06
M175T280	174.534	280.1	4.7	1.09477e+06	1.20238e+06	2.37503e+06	947634	749014	582487	1.50924e+06	1.48579e+06	2.30045e+06	2.32548e+06	3.39937e+06	2.15944e+06	2.40667e+06	2.03813e+06	3.32223e+06	3.06361e+06	2.52262e+06	2.85094e+06	3.59953e+06	2.4747e+06	3.33792e+06	2.211e+06	2.52368e+06	2.99755e+06	1.80146e+06	1.71135e+06	1.67818e+06	1.7118e+06	1.82624e+06	1.78931e+06	1.79112e+06
M175T350	175.06	349.9	5.8	496059	441565	514332	470484	557341	398314	87006.7	472161	700384	443768	754907	655135	583458	455424	431039	645915	320174	543083	424976	619416	403205	163245	353358	445382	455555	478189	444600	447021	483025	262592	549976
M175T387	175.06	386.6	6.4	68037.2	42258.7	63013.4	55562.2	117303	84194.8	93029.5	71370.7	57342.6	183339	427275	66267.3	1.01138e+06	30321	739464	611521	726903	1.35353e+06	1.38735e+06	492037	450581	1.33397e+06	854619	1.03366e+06	452615	492973	473267	492935	507441	488160	488259
M175T396	175.087	396	6.6	1.11251e+06	754939	574094	1.88772e+06	665217	609286	575007	679202	965893	513495	807663	637130	260213	599884	670674	589878	741519	998753	600044	715802	569906	541269	494663	814931	532184	399319	240110	286559	483801	414289	438152
M175T441	175.079	440.5	7.3	4.54189e+06	4.72294e+06	888889	3.41084e+06	1.30426e+06	1.81617e+06	5.17356e+06	2.27162e+06	2.82566e+06	2.5162e+06	880178	3.4613e+06	2.65721e+06	2.83995e+06	3.42583e+06	3.48217e+06	2.83078e+06	2.34054e+06	2.68962e+06	2.49634e+06	3.19194e+06	1.64719e+06	2.48681e+06	2.14657e+06	1.89582e+06	1.61545e+06	1.95497e+06	2.38699e+06	2.87273e+06	1.92731e+06	2.40218e+06
M175T447	175.03	446.8	7.4	195049	501947	241628	554303	323654	292792	246822	153341	144430	23298.8	174679	119095	126398	74327.8	18315.7	70257.4	138974	40182.4	250478	106346	88062.2	88256.7	163171	134700	171023	182463	161541	138736	165823	171008	171227
M175T578	175.189	577.9	9.6	57250.5	205963	184534	88707.9	31451.9	7254.37	396271	535771	35538.5	3276.4	290884	200230	502928	510751	227690	223901	74513.3	140625	865.043	253798	161293	34381.4	453090	482152	364660	280033	284751	357812	451907	350488	277285
M175T65	175.09	65	1.1	1.82775e+06	1.78633e+06	1.25183e+06	1.48097e+06	1.29833e+06	1.25154e+06	1.48592e+06	1.70728e+06	995515	1.23602e+06	1.00884e+06	975664	745892	1.2603e+06	1.60461e+06	1.38173e+06	1.98579e+06	1.81517e+06	1.65555e+06	2.05516e+06	1.97293e+06	949907	1.42357e+06	1.2203e+06	1.59391e+06	1.54865e+06	1.52289e+06	1.73492e+06	1.602e+06	1.60564e+06	1.60454e+06
M175T652	175.096	652.1	10.9	1.49057e+06	906723	817903	219049	1.00834e+06	592142	2.38746e+06	2.26549e+06	2.79985e+06	161973	1.81618e+06	892298	138264	371363	220863	658683	896340	274906	66985.8	725422	339737	433130	204512	452598	926372	981182	661044	990564	931929	995613	990710
M175T744	175.148	744.2	12.4	2.2362e+07	2.51331e+07	2.23208e+07	2.8092e+07	2.42943e+07	2.56039e+07	3.01469e+07	2.07808e+07	3.34533e+07	3.90384e+07	1.69155e+07	3.38125e+07	3.0996e+07	3.14e+07	1.53073e+07	4.19436e+07	2.15072e+07	3.44435e+07	3.06809e+07	1.09947e+07	2.37217e+07	2.22461e+07	3.56069e+07	4.22653e+07	1.40587e+07	1.34743e+07	2.03253e+07	1.34694e+07	1.32924e+07	1.7218e+07	1.30348e+07
M175T758	175.112	757.6	12.6	6.53198e+06	7.83682e+06	7.84859e+06	3.83028e+06	1.43872e+07	1.83552e+07	9.69849e+06	5.90423e+06	8.15664e+06	5.83336e+06	7.29491e+06	1.23846e+07	5.76167e+06	3.84192e+06	4.89689e+06	4.2232e+06	2.13748e+06	2.18355e+06	4.70319e+06	4.04778e+06	3.23319e+06	8.65014e+06	5.02645e+06	3.14716e+06	5.74985e+06	5.02434e+06	6.00479e+06	5.60467e+06	5.74531e+06	6.39726e+06	5.92589e+06
M175T80	174.938	80.1	1.3	5.89849e+07	6.03465e+07	6.47963e+07	6.3021e+07	5.89592e+07	5.64076e+07	6.48541e+07	6.27725e+07	6.66323e+07	5.87943e+07	5.05539e+07	5.94921e+07	4.99589e+07	6.50839e+07	6.82672e+07	6.24169e+07	6.59621e+07	4.78343e+07	6.93198e+07	9.19315e+07	6.39307e+07	8.0152e+07	6.32893e+07	6.25817e+07	6.55961e+07	6.91988e+07	6.17826e+07	6.02299e+07	6.55923e+07	6.21568e+07	6.61308e+07
M175T82	174.896	82.3	1.4	1.63134e+07	1.73299e+07	8.5545e+06	4.64396e+07	1.04295e+07	1.21088e+07	9.22769e+06	1.27522e+07	1.45231e+07	1.88015e+07	5.56701e+07	1.63949e+07	1.8972e+07	9.30111e+06	1.25335e+07	1.14759e+07	1.30264e+07	1.10112e+07	1.04779e+07	2.04105e+07	1.33007e+07	2.5149e+07	2.81534e+07	1.23397e+07	2.40035e+07	2.18842e+07	1.6428e+07	2.21236e+07	2.38172e+07	2.38264e+07	2.38234e+07
M175T83_1	175.119	83.2	1.4	3.81804e+08	3.65965e+08	4.33042e+08	9.91884e+07	1.00833e+08	3.69375e+08	6.1522e+08	3.95264e+08	3.64685e+08	7.62822e+08	4.31566e+08	4.3481e+08	3.56093e+08	2.87699e+08	3.73692e+08	3.31782e+08	5.72471e+08	4.3221e+08	2.97905e+08	3.44289e+08	3.26684e+08	4.81174e+08	3.62509e+08	2.79838e+08	4.29449e+08	4.37062e+08	4.751e+08	4.37658e+08	4.80827e+08	4.32269e+08	4.76583e+08
M175T83_2	175.144	82.8	1.4	1.87551e+06	5.97439e+06	5.69875e+06	2.09658e+06	5.23539e+06	5.65105e+06	5.23376e+06	6.27054e+06	5.60927e+06	5.1123e+06	4.98744e+06	4.94005e+06	5.35298e+06	5.17648e+06	5.18419e+06	5.20064e+06	5.50161e+06	5.54483e+06	5.18169e+06	5.22272e+06	5.73352e+06	5.5615e+06	6.2377e+06	5.58509e+06	5.19373e+06	5.33645e+06	5.61604e+06	5.70868e+06	5.41532e+06	5.6674e+06	5.78388e+06
M176T103	176.111	103.4	1.7	417534	443868	494514	175751	215739	401445	553441	345009	6.06587e+06	8.81839e+06	7.38869e+06	8.11974e+06	3.35928e+06	6.01394e+06	9.21725e+06	8.14672e+06	256001	2.69777e+06	304708	747542	322195	3.37155e+06	3.39605e+06	2.85035e+06	1.27299e+06	1.25263e+06	707641	1.56725e+06	1.73063e+06	1.40105e+06	1.87902e+06
M176T104	176.075	103.6	1.7	1.01325e+06	1.14359e+06	1.1838e+06	1.12408e+06	1.11213e+06	996988	1.09069e+06	1.05633e+06	1.05106e+06	834370	1.02344e+06	1.07385e+06	565802	1.19795e+06	639832	1.01109e+06	1.21193e+06	459241	1.42899e+06	1.28305e+06	955733	932209	773111	1.14489e+06	1.17435e+06	1.17793e+06	1.1914e+06	1.05492e+06	1.22717e+06	926424	809711
M176T105	176.165	105.1	1.8	2.34775e+06	2.51174e+06	2.79417e+06	1.76006e+06	2.07725e+06	1.21032e+06	2.95213e+06	3.08159e+06	1.25276e+06	1.75076e+06	1.78803e+06	1.75426e+06	911245	2.37385e+06	1.71968e+06	1.59587e+06	3.92263e+06	993481	3.34414e+06	3.76219e+06	3.01455e+06	1.6905e+06	1.35742e+06	2.13465e+06	2.04984e+06	1.98699e+06	1.94853e+06	1.99012e+06	1.99175e+06	1.98874e+06	2.16895e+06
M176T106	176.092	106.5	1.8	6.19151e+06	625581	666089	1.34381e+07	408865	325108	360670	237853	9.4479e+06	1.80179e+07	7.58122e+06	1.83695e+07	9.06247e+06	1.79959e+07	1.21146e+07	1.21924e+07	1.29463e+07	9.38082e+06	1.54339e+07	306569	7.20431e+06	2.96607e+06	1.36074e+07	1.39491e+07	7.0465e+06	7.41204e+06	7.27771e+06	7.28104e+06	7.28098e+06	6.94157e+06	6.37293e+06
M176T110	176.128	110.4	1.8	2.35645e+07	6.24758e+06	4.61531e+06	2.48522e+07	1.53873e+07	1.49601e+07	4.41731e+06	2.85156e+06	1.37289e+07	1.54223e+07	3.43144e+06	3.09573e+06	4.38601e+06	2.95164e+06	2.74733e+06	2.9158e+06	2.69741e+06	3.36857e+06	1.42671e+07	3.49137e+06	2.53606e+06	1.69655e+07	3.77823e+06	4.63241e+06	1.31995e+07	1.25667e+07	1.2577e+07	1.25767e+07	1.3321e+07	1.3417e+07	1.33914e+07
M176T112	176.075	112.4	1.9	1.25847e+06	821387	1.27709e+06	1.09183e+06	1.39162e+06	2.03311e+06	912078	850072	64053.5	30967.1	662919	76005.4	8392.98	102505	22070.5	17035.6	923771	7669.9	1.56685e+06	930449	829874	846801	503413	1.77387e+06	642565	673113	715970	709278	638145	638583	548503
M176T115	176.092	115.2	1.9	1.21563e+06	5.04934e+06	978054	761976	1.72119e+06	1.90788e+06	1.27983e+06	944764	223419	665580	219105	260962	2.29947e+06	271700	247568	248712	201998	791362	925273	2.15915e+06	192292	217189	208245	221536	1.2136e+06	1.21505e+06	1.52023e+06	1.05463e+06	1.05375e+06	1.58545e+06	1.39933e+06
M176T116	176.038	116.4	1.9	944385	226405	912779	1.14587e+06	835987	957419	906161	777743	2.22218e+06	2.54125e+06	2.36753e+06	2.82854e+06	3.35434e+06	2.28623e+06	2.65193e+06	2.3576e+06	292761	2.99347e+06	668132	944875	879310	1.57614e+06	1.83507e+06	1.63658e+06	1.5404e+06	1.62315e+06	1.53386e+06	1.52827e+06	1.53488e+06	2.00787e+06	1.61498e+06
M176T121	176.128	121.4	2	1.07007e+07	6.64187e+06	7.89604e+06	1.03099e+07	8.13008e+06	6.6763e+06	8.42831e+06	9.76912e+06	3.79162e+06	9.33749e+06	3.90042e+06	9.16287e+06	8.50659e+06	6.4131e+06	4.95388e+06	1.03819e+07	6.1823e+06	8.99884e+06	1.01241e+07	8.751e+06	3.24028e+06	4.70281e+06	1.01027e+07	8.21302e+06	8.578e+06	8.83902e+06	9.35062e+06	9.34538e+06	9.71026e+06	7.69582e+06	7.43627e+06
M176T192	176.037	192.2	3.2	4.79878e+06	9.37634e+06	2.33503e+06	1.37357e+07	5.67402e+06	2.86337e+06	2.88442e+06	2.26137e+06	2.44605e+06	1.78183e+06	2.07232e+06	1.80808e+06	3.78898e+06	1.65104e+06	3.07838e+06	2.52596e+06	6.63671e+06	5.00534e+06	9.61623e+06	5.59805e+06	5.42293e+06	1.42215e+06	4.63024e+06	5.69692e+06	5.01713e+06	5.35512e+06	4.78668e+06	5.09759e+06	5.09563e+06	4.68197e+06	5.09739e+06
M176T219	176.037	219.4	3.7	7.66813e+06	6.66144e+06	9.85465e+06	6.33818e+06	8.52589e+06	9.15449e+06	5.89666e+06	9.1599e+06	8.26385e+06	6.55696e+06	7.43348e+06	7.81721e+06	5.40731e+06	7.11055e+06	6.51285e+06	6.15608e+06	8.4119e+06	3.98186e+06	5.77642e+06	1.96655e+06	9.54427e+06	9.83022e+06	6.84086e+06	8.81048e+06	8.21057e+06	7.33236e+06	7.50465e+06	7.5704e+06	5.99193e+06	5.39717e+06	8.17769e+06
M176T351	176.118	350.8	5.8	202991	84941.6	74536.5	150968	73806.6	72234.1	134746	214786	52192.1	141997	214142	98052.2	184802	122745	158935	34684.3	69248.7	69444.2	145404	123057	228320	79233.1	142359	133662	135409	125889	134330	145240	127064	127168	88798.2
M176T375	176.037	375	6.2	1.39543e+06	5.32759e+06	5.4067e+06	7.45128e+06	5.65215e+06	3.5431e+06	3.38619e+06	4.32619e+06	4.92384e+06	5.34932e+06	5.17834e+06	5.97528e+06	4.99546e+06	5.79997e+06	3.33938e+06	3.76291e+06	5.25761e+06	3.59607e+06	4.25368e+06	2.85106e+06	5.12427e+06	4.45097e+06	3.94316e+06	1.86295e+06	3.60715e+06	4.28098e+06	5.03603e+06	5.07867e+06	5.05159e+06	5.14182e+06	5.06633e+06
M176T376	176.107	376.3	6.3	791692	1.43246e+06	527930	481753	444292	329127	662513	223490	519711	760228	739744	686858	902882	612258	382513	501703	749886	382127	609093	691029	533877	470503	551038	500566	829170	518574	626692	659751	618779	660588	618337
M176T441	176.082	440.5	7.3	131696	139138	259801	133163	108735	219797	231660	291809	346848	237495	270606	320308	139613	112212	240819	144697	195087	212815	284215	137201	192199	308569	288822	305331	183013	230203	232425	169815	229818	231106	216916
M176T479	176.128	479.3	8	205422	25076.1	30589.3	1.57797e+06	397781	246745	75823.6	65966.6	25882.2	236823	98738.4	37571	41571.5	411527	245819	291966	273775	47516.9	1.94167e+06	24555.8	121878	245571	139629	99330.5	170945	114470	160626	116579	141094	168953	100859
M176T534	176.071	534.1	8.9	950787	712291	686910	649366	546257	441502	822261	527961	1.08199e+06	444877	1.03544e+06	1.00489e+06	598235	876144	434127	346506	542978	270544	580421	748793	1.08213e+06	832693	930589	992920	445138	412392	524413	407477	384033	344992	469015
M176T727	176.107	726.9	12.1	590265	614670	799574	418780	2.05162e+06	945263	1.77019e+06	1.00282e+06	1.04389e+06	1.03305e+06	1.53145e+06	1.20985e+06	1.75803e+06	1.15157e+06	981969	1.12543e+06	573790	1.16353e+06	687090	934906	1.07012e+06	1.12784e+06	1.01161e+06	1.04863e+06	631239	1.31249e+06	1.25378e+06	1.31192e+06	701587	1.36816e+06	1.30048e+06
M176T744	176.151	744.1	12.4	1.13346e+06	1.13336e+06	1.67015e+06	2.37373e+06	1.54632e+06	1.95739e+06	2.2863e+06	1.57933e+06	1.30011e+06	1.59251e+06	3.21447e+06	1.6379e+06	2.15448e+06	1.0297e+06	1.21831e+06	2.7343e+06	1.52256e+06	2.77825e+06	2.52821e+06	1.08956e+06	2.1171e+06	1.91987e+06	2.46117e+06	1.66819e+06	1.46796e+06	1.57029e+06	1.12972e+06	1.8608e+06	1.39066e+06	1.27555e+06	1.25673e+06
M176T80	175.941	80	1.3	1.49684e+06	1.3833e+06	493722	1.30267e+06	1.69159e+06	1.65669e+06	1.89116e+06	1.60372e+06	800777	1.85308e+06	1.56058e+06	1.55749e+06	556316	604637	1.71309e+06	1.3732e+06	2.25023e+06	1.54526e+06	839912	1.0968e+06	1.46919e+06	1.0989e+06	1.81279e+06	1.40924e+06	1.16765e+06	965460	977245	1.16474e+06	1.16499e+06	947679	938491
M176T83	176.122	83.2	1.4	2.57369e+07	3.31953e+07	6.59896e+07	1.96976e+07	2.36436e+07	2.32433e+07	4.58108e+07	5.90247e+07	5.90491e+07	7.18557e+07	6.73578e+07	2.54708e+07	3.04601e+07	6.35231e+07	3.11317e+07	7.05137e+07	3.88168e+07	9.14596e+07	1.76489e+07	5.34974e+07	4.55909e+07	3.79896e+07	4.29212e+07	5.41588e+07	2.61005e+07	2.64647e+07	3.4072e+07	2.17183e+07	3.75623e+07	2.78267e+07	3.0456e+07
M176T89	176.103	88.9	1.5	1.30426e+08	1.50168e+08	2.10079e+07	1.66827e+08	3.08024e+07	9.66729e+07	5.81667e+07	1.79471e+08	1.47643e+08	1.50625e+08	1.52628e+08	2.00633e+08	1.62265e+08	1.17781e+08	1.44639e+08	1.4981e+08	9.41998e+07	1.49295e+08	1.97724e+07	9.16772e+07	1.06985e+08	6.57111e+07	1.14318e+08	5.92966e+07	1.21526e+08	1.40517e+08	4.30238e+07	1.35392e+08	1.3217e+08	1.21302e+08	1.43115e+08
M176T98	176.037	98.3	1.6	1.70977e+06	1.12139e+06	867074	1.87731e+06	1.7355e+06	2.18372e+06	1.07911e+06	2.20014e+06	1.3968e+06	1.82527e+06	1.4012e+06	2.08469e+06	2.35575e+06	1.20778e+06	1.9567e+06	1.0467e+06	1.23885e+06	1.39135e+06	1.5983e+06	1.77228e+06	1.58781e+06	2.03704e+06	1.71849e+06	1.40488e+06	2.14004e+06	2.09066e+06	1.91219e+06	1.54404e+06	2.07496e+06	1.72641e+06	2.0743e+06
M177T100	177.065	100	1.7	256512	239480	205977	238136	256380	215571	242422	328161	1.26621e+06	2.30843e+06	3.25261e+06	2.69291e+06	2.54503e+06	2.60367e+06	2.73534e+06	2.55853e+06	338367	1.59276e+06	1.12142e+06	680148	188274	1.05042e+06	2.64382e+06	2.59366e+06	1.13554e+06	1.35985e+06	1.2301e+06	1.08639e+06	1.26503e+06	1.33076e+06	1.26473e+06
M177T107	177.095	106.7	1.8	286849	457493	274332	328891	397597	250275	692902	160438	216921	151494	265310	291136	199351	190736	234130	222220	148833	275973	251337	303445	109571	257075	407919	191458	316656	308920	312236	278316	338361	308889	316201
M177T110	177.132	110.4	1.8	2.7804e+06	995824	699205	3.31396e+06	2.03319e+06	1.90845e+06	906128	745988	2.04658e+06	1.84376e+06	740676	902760	846709	772840	780398	743139	604179	626391	1.76487e+06	573435	493845	1.62903e+06	694960	814630	1.42757e+06	1.42803e+06	1.59438e+06	1.33782e+06	1.42674e+06	1.17907e+06	1.37993e+06
M177T113_1	177.022	112.5	1.9	568567	2.4912e+06	505936	423760	169062	418924	573425	952065	427718	742115	501518	578215	126174	233285	185038	183617	733318	156647	454203	489714	1.91728e+06	780043	536526	1.79524e+06	352553	396212	415427	395742	484755	425875	397200
M177T113_2	177.039	112.6	1.9	820523	227410	211933	357443	439206	991766	458198	842997	988657	845067	785101	436349	272125	742938	609372	267315	223259	257037	252902	298106	771764	1.18566e+06	255656	858329	357146	561273	397731	343415	348563	285884	494861
M177T115	176.998	114.5	1.9	552839	183295	927071	865576	646233	906856	551268	165930	230678	1.08622e+06	273033	206544	350224	864126	326397	934848	238378	1.54737e+06	218648	233743	846076	275290	635944	915407	853877	865125	916793	850754	845295	918189	931632
M177T310	177.102	309.5	5.2	1.86432e+06	1.16467e+06	1.81133e+06	2.3504e+06	2.15954e+06	93428.3	1.74545e+06	1.67749e+06	953899	1.49439e+06	879705	1.56702e+06	618123	2.83096e+06	939841	1.0503e+06	5.11303e+06	55843.5	3.34314e+06	2.54805e+06	2.92517e+06	623198	959492	2.11793e+06	1.86431e+06	1.86472e+06	1.73496e+06	1.86452e+06	1.88118e+06	1.88114e+06	1.88126e+06
M177T328	177.106	327.7	5.5	1.12147e+06	2.29454e+06	2.72436e+06	1.49663e+06	2.31481e+06	2.35126e+06	2.17987e+06	2.5894e+06	4.39837e+06	5.02462e+06	5.50575e+06	4.71868e+06	5.78749e+06	5.66612e+06	5.84879e+06	5.68253e+06	3.22004e+06	6.2674e+06	3.58674e+06	3.36954e+06	3.3042e+06	4.54213e+06	4.55786e+06	4.83851e+06	3.69541e+06	3.28032e+06	3.69571e+06	3.76535e+06	3.87195e+06	3.75814e+06	3.69609e+06
M177T33	176.971	32.8	0.5	9.29577e+06	1.12596e+07	9.89919e+06	8.7054e+06	1.01458e+07	8.66337e+06	1.02674e+07	8.53986e+06	1.05412e+07	1.13078e+07	9.63853e+06	9.95858e+06	9.92493e+06	9.73452e+06	1.00691e+07	9.44521e+06	1.04621e+07	1.56821e+07	1.27909e+07	1.08743e+07	9.09689e+06	9.2188e+06	9.97703e+06	9.08548e+06	9.02926e+06	9.06518e+06	9.03006e+06	9.19468e+06	9.18184e+06	9.03531e+06	9.47731e+06
M177T353	177.112	353.4	5.9	2.9025e+06	1.65741e+06	1.8332e+06	3.22054e+06	1.4102e+06	1.4742e+06	1.54711e+06	1.81321e+06	1.50994e+06	1.50459e+06	1.5297e+06	1.77936e+06	1.15835e+06	1.4401e+06	1.53611e+06	1.6667e+06	1.56934e+06	2.14287e+06	1.48418e+06	1.37503e+06	1.09677e+06	1.97159e+06	1.03431e+06	1.38426e+06	1.42197e+06	1.4234e+06	1.48693e+06	1.28591e+06	1.41981e+06	1.51967e+06	1.47979e+06
M177T595	177.127	595.5	9.9	1.26291e+06	863188	1.28913e+06	719454	1.52839e+06	2.92328e+06	1.8893e+06	1.59375e+06	2.20526e+06	1.88372e+06	3.02242e+06	2.05237e+06	621027	1.71134e+06	1.44573e+06	509968	1.43223e+06	661311	1.1432e+06	1.49813e+06	1.29096e+06	419387	404303	1.02795e+06	1.23614e+06	1.16729e+06	1.01495e+06	1.01843e+06	1.42822e+06	773535	1.02611e+06
M177T62	176.971	62.2	1	7.5606e+06	7.8353e+06	6.47137e+06	8.02899e+06	7.32726e+06	7.26805e+06	7.73314e+06	7.77162e+06	7.13709e+06	6.3674e+06	7.62384e+06	7.75647e+06	7.8054e+06	7.45013e+06	8.15779e+06	7.23957e+06	8.78696e+06	1.05273e+07	1.10567e+07	7.9552e+06	7.50342e+06	7.11321e+06	7.66612e+06	7.00322e+06	7.54633e+06	7.61759e+06	6.60642e+06	8.00474e+06	8.14339e+06	7.55776e+06	7.66553e+06
M177T621	177.127	621.4	10.4	5.24326e+06	7.08503e+06	1.60124e+07	1.87902e+06	2.55082e+07	7.65136e+06	1.73498e+07	5.98445e+06	1.18761e+07	4.67787e+06	6.83001e+06	1.24249e+07	4.05533e+06	3.7809e+06	4.26212e+06	4.36922e+06	4.08475e+06	1.01575e+07	6.8345e+06	4.27417e+06	6.95962e+06	7.71408e+06	3.34621e+06	1.01223e+07	3.59143e+06	7.22352e+06	7.6232e+06	5.63076e+06	6.18597e+06	4.91903e+06	6.20073e+06
M177T65	177.014	64.8	1.1	1.89198e+06	2.25773e+06	1.06511e+06	1.82151e+06	1.55385e+06	1.42543e+06	2.93873e+06	1.47452e+06	2.56888e+06	2.62909e+06	2.41376e+06	2.32188e+06	247563	2.55976e+06	572609	1.13212e+06	2.67665e+06	3.15102e+06	2.10881e+06	2.59941e+06	2.25017e+06	1.43737e+06	2.72913e+06	2.29526e+06	2.32548e+06	1.62216e+06	1.86768e+06	1.67994e+06	1.43995e+06	1.43382e+06	1.53479e+06
M177T751	177.164	750.8	12.5	830186	460040	1.56103e+06	847085	751993	1.64076e+06	685707	923152	1.74688e+06	1.79276e+06	4.76953e+06	4.8836e+06	1.57459e+06	5.322e+06	1.35113e+06	2.7483e+06	3.62047e+06	1.88106e+06	664394	1.15047e+06	544143	3.73614e+06	4.04112e+06	2.7699e+06	2.18283e+06	1.87984e+06	2.17661e+06	2.68032e+06	2.17973e+06	1.92606e+06	1.887e+06
M177T78	177.061	77.9	1.3	674746	1.65232e+06	1.7544e+06	623624	1.69033e+06	1.50168e+06	1.80875e+06	1.69961e+06	1.73678e+06	1.72544e+06	1.87565e+06	1.69634e+06	1.41301e+06	2.17641e+06	1.79114e+06	1.75384e+06	1.76406e+06	1.85281e+06	1.96518e+06	2.20544e+06	1.95259e+06	1.74106e+06	1.75743e+06	1.72275e+06	1.69922e+06	1.75487e+06	1.79033e+06	1.76624e+06	1.805e+06	1.789e+06	1.76998e+06
M177T781	177.127	781.2	13	1.19789e+07	2.349e+06	1.00719e+07	3.22583e+06	1.52291e+07	1.75764e+07	1.31658e+07	1.30961e+07	1.34027e+07	1.60531e+07	5.54071e+06	5.10516e+06	2.81031e+06	4.38775e+06	8.97293e+06	3.24895e+06	5.69415e+06	8.95238e+06	1.33783e+07	1.27211e+07	8.57355e+06	7.84243e+06	3.18588e+06	1.10396e+07	6.58438e+06	8.39659e+06	7.4784e+06	8.41596e+06	9.61927e+06	7.49165e+06	7.46581e+06
M177T785	177.055	784.8	13.1	605381	1.11885e+06	2.47545e+06	1.4286e+06	635289	1.07828e+06	4.20452e+06	4.37497e+06	2.48692e+06	1.52086e+06	3.34024e+06	1.3981e+06	1.45941e+06	5.21748e+06	506366	109155	1.44033e+06	1.12934e+06	1.91526e+06	2.80556e+06	466634	4.06575e+06	1.71424e+06	1.52537e+06	3.80936e+06	3.75177e+06	4.00132e+06	3.93075e+06	3.99242e+06	3.89206e+06	1.88554e+06
M177T80	176.936	80.1	1.3	4.39241e+06	4.14839e+06	6.03088e+06	4.45047e+06	4.86803e+06	5.63645e+06	7.24693e+06	5.69504e+06	4.00192e+06	4.27511e+06	3.68081e+06	3.67562e+06	3.8015e+06	4.12883e+06	3.79847e+06	3.53098e+06	3.93142e+06	4.73077e+06	5.02316e+06	4.20413e+06	4.06233e+06	3.79076e+06	3.4719e+06	4.41332e+06	5.29882e+06	4.75689e+06	4.3208e+06	4.26461e+06	4.13044e+06	4.53522e+06	4.12318e+06
M177T89	177.106	89	1.5	9.57791e+06	9.37861e+06	9.23724e+06	7.34864e+06	7.62687e+06	7.97173e+06	9.38199e+06	7.72638e+06	7.69036e+06	8.65628e+06	8.29662e+06	9.01552e+06	9.03391e+06	9.91919e+06	9.02337e+06	9.10517e+06	9.13376e+06	3.84864e+06	6.79294e+06	8.41513e+06	9.04847e+06	8.56786e+06	8.12806e+06	7.51398e+06	9.49854e+06	7.70944e+06	8.3681e+06	7.69675e+06	7.69732e+06	7.54399e+06	8.167e+06
M177T91	177.087	91.3	1.5	1.69123e+06	1.54451e+06	1.43459e+06	1.30849e+06	1.35466e+06	1.51987e+06	1.65732e+06	1.60518e+06	1.57688e+06	1.47196e+06	1.53085e+06	1.43677e+06	1.53264e+06	1.51146e+06	1.82495e+06	1.4179e+06	1.493e+06	1.43637e+06	1.47049e+06	1.50395e+06	1.58178e+06	1.73921e+06	1.69025e+06	1.6049e+06	1.48048e+06	1.50322e+06	1.57439e+06	1.4745e+06	1.51086e+06	1.47988e+06	1.50979e+06
M178T105	178.053	104.7	1.7	763541	530592	2.01641e+06	324583	1.12818e+06	1.50701e+06	3.15174e+06	2.06551e+06	1.81322e+06	1.62255e+06	1.71632e+06	1.40313e+06	359215	2.17212e+06	938812	926266	1.45097e+06	1.13103e+06	1.93883e+06	3.15308e+06	2.70227e+06	2.14068e+06	1.06802e+06	1.94371e+06	1.62657e+06	1.62493e+06	1.62691e+06	1.68975e+06	1.68358e+06	1.63113e+06	1.68301e+06
M178T107	178.085	106.7	1.8	1.46678e+06	2.46263e+06	1.42468e+06	2.49044e+06	2.26276e+06	1.46553e+06	1.39117e+06	876413	973344	1.09859e+06	783675	1.87654e+06	1.41367e+06	1.77637e+06	1.87045e+06	2.07848e+06	1.3639e+06	1.59158e+06	1.62738e+06	1.36587e+06	280300	994190	1.99751e+06	1.08368e+06	1.98149e+06	2.06103e+06	2.08993e+06	2.06063e+06	2.11645e+06	2.08596e+06	2.08882e+06
M178T348	178.053	348.3	5.8	344209	170680	299977	284071	435829	356275	345920	299505	507644	358800	446030	317368	554113	297730	358290	404307	318733	521122	537465	440732	239678	387797	348630	229181	351633	344418	344763	344515	356462	344615	389046
M178T403	178.134	402.7	6.7	1.57933e+07	8.727e+06	1.9383e+07	2.50309e+07	1.33965e+07	1.27714e+07	1.57598e+07	1.20906e+07	6.46451e+06	9.13705e+06	1.90112e+07	1.79455e+07	1.7894e+07	1.4311e+07	1.69004e+07	8.13141e+06	2.6532e+07	1.13189e+07	1.16758e+07	4.1817e+07	3.62538e+07	1.40188e+07	1.13305e+07	1.41596e+07	2.14066e+07	1.95155e+07	1.78668e+07	1.70067e+07	1.9395e+07	1.56242e+07	1.95168e+07
M178T428	178.086	427.8	7.1	1.59261e+06	1.84752e+06	1.84097e+06	2.50921e+06	1.83249e+06	1.27493e+06	1.81617e+06	2.44635e+06	1.12318e+06	1.1216e+06	1.33157e+06	1.40171e+06	1.03201e+06	1.01414e+06	1.26735e+06	1.33439e+06	1.13134e+06	802569	1.01973e+06	1.49079e+06	973390	998604	768496	993906	1.24478e+06	1.31929e+06	1.24506e+06	1.27448e+06	1.26481e+06	1.27413e+06	1.16537e+06
M178T619	178.036	618.7	10.3	580760	694230	1.34273e+06	909543	1.37153e+06	974697	1.01781e+06	1.59571e+06	1.61841e+06	1.86542e+06	2.70296e+06	1.76553e+06	1.45895e+06	1.85745e+06	2.01652e+06	1.93149e+06	1.30557e+06	1.90301e+06	1.37132e+06	1.12367e+06	1.62925e+06	1.51897e+06	1.39033e+06	1.05825e+06	1.83641e+06	1.62336e+06	1.66957e+06	1.66984e+06	1.61959e+06	1.63899e+06	1.67058e+06
M178T621	178.131	621.4	10.4	468830	679884	1.55016e+06	160616	1.34267e+06	344031	1.13498e+06	1.26516e+06	1.5571e+06	357568	1.16713e+06	1.27416e+06	672157	269646	493067	270432	659904	534288	594816	759685	299540	613722	285372	800331	607264	636155	637947	406887	636885	605761	636180
M178T635	178.159	634.8	10.6	517695	714701	1.2884e+06	1.27359e+06	576088	605957	561588	1.82851e+06	756041	847859	964122	879452	1.04087e+06	867431	1.14716e+06	1.14172e+06	1.04675e+06	736583	498985	1.07456e+06	542157	558925	931815	950585	990790	854783	685835	899720	915032	917053	779553
M178T667	178.099	667.2	11.1	648302	283593	412808	2.18928e+06	435407	75570.5	281844	1.21212e+06	661121	230171	432240	1.08035e+06	1.40914e+06	325611	811097	671721	544592	1.49871e+06	2.84568e+06	967570	302917	675673	965284	1.52161e+06	602925	885960	715731	704202	490252	732498	615121
M178T671	178.123	671	11.2	931908	253203	848876	1.0023e+06	839241	1.57542e+06	1.20614e+06	608243	1.09753e+06	1.12115e+06	2.04757e+06	1.42068e+06	723118	687078	1.28383e+06	635388	595071	1.25633e+06	673057	1.14624e+06	983048	543656	422375	378168	1.14925e+06	913352	913795	914668	917033	967041	1.04255e+06
M178T769	178.123	768.6	12.8	4.27899e+06	5.21158e+06	3.92632e+06	3.31512e+06	2.35487e+06	3.60999e+06	3.57473e+06	4.80211e+06	3.57508e+06	2.84485e+06	4.46522e+06	2.38393e+06	5.09835e+06	5.35888e+06	7.17993e+06	6.25523e+06	3.83003e+06	3.9375e+06	4.97832e+06	4.59725e+06	2.70631e+06	4.85273e+06	3.35619e+06	6.49748e+06	2.79608e+06	2.62225e+06	2.95841e+06	2.95138e+06	2.75272e+06	2.95062e+06	2.94397e+06
M178T781	178.131	781.1	13	669759	436823	542678	584376	894380	458910	441575	366766	401239	478683	898268	779699	510021	667671	291578	498809	743380	377993	285128	495819	376050	335573	489948	319673	637075	568791	636160	498606	635378	608480	622183
M178T81	178.058	80.7	1.3	2.49169e+07	2.43752e+07	2.33925e+07	2.5182e+07	2.52274e+07	2.5539e+07	2.34775e+07	2.45952e+07	2.3563e+07	2.20518e+07	2.76469e+07	2.36502e+07	2.48881e+07	2.51274e+07	2.43655e+07	2.46364e+07	2.67054e+07	2.41584e+07	2.37167e+07	3.27303e+07	2.43794e+07	2.48223e+07	2.39609e+07	2.62656e+07	2.36234e+07	2.2801e+07	1.79418e+07	2.47506e+07	2.44282e+07	2.40252e+07	2.45127e+07
M178T90	178.071	89.5	1.5	3.35874e+06	5.30222e+06	5.96142e+06	2.65448e+06	5.72616e+06	4.99049e+06	6.6931e+06	5.49502e+06	4.43416e+06	4.37614e+06	4.50962e+06	4.47882e+06	2.83458e+06	4.34817e+06	3.82667e+06	3.73523e+06	4.84983e+06	3.74377e+06	4.28141e+06	4.07012e+06	4.57417e+06	3.62495e+06	3.3425e+06	5.30363e+06	4.07876e+06	4.08214e+06	4.07777e+06	4.0823e+06	4.12003e+06	4.20247e+06	4.70975e+06
M179T116	179.082	115.6	1.9	351009	309799	304821	398041	391161	239933	346732	206687	343469	275426	263170	316629	194369	207736	201114	203968	221380	210801	266745	198860	158036	330756	217414	260357	292711	388319	312449	347388	378142	335978	335479
M179T346	179.082	345.7	5.8	1.05673e+06	433789	45680.7	1.47488e+06	1.04328e+06	1.17678e+06	440596	351130	388547	2.42982e+06	365845	481235	402710	376497	468647	426344	312814	350456	436460	422535	295557	2.42029e+06	365779	351513	884501	1.37889e+06	683967	856574	960161	960686	958320
M179T356	178.549	356.5	5.9	2.43843e+06	5.73031e+06	2.4559e+06	5.71736e+06	3.48889e+06	1.63927e+06	5.20393e+06	3.60182e+06	2.11474e+06	2.30065e+06	665245	3.04274e+06	2.33995e+06	515797	1.85772e+06	1.54206e+06	2.83635e+06	2.00066e+06	7.94122e+06	628057	1.99415e+06	2.51191e+06	3.04548e+06	1.8194e+06	1.49253e+06	1.8833e+06	1.67457e+06	1.88503e+06	1.82826e+06	1.82708e+06	2.09357e+06
M179T403	179.137	402.7	6.7	1.65042e+06	1.21575e+06	546820	2.85235e+06	1.3622e+06	675703	1.45361e+06	1.51169e+06	1.2633e+06	1.50683e+06	729173	1.37395e+06	3.25698e+06	2.33718e+06	1.99099e+06	1.32029e+06	652032	1.72606e+06	1.30279e+06	4.72819e+06	4.23597e+06	201972	2.17688e+06	879360	1.74079e+06	1.56437e+06	1.97659e+06	1.76938e+06	1.99802e+06	1.70334e+06	2.30516e+06
M179T415	179.154	415.2	6.9	1.37408e+06	90066.9	1.64405e+06	980025	838135	491477	328102	466832	564555	252775	516505	981152	81664.6	332741	452842	559298	617132	380713	75366.3	145689	231642	795150	119279	640156	510845	407896	516138	418180	306483	519893	495655
M179T472	179.092	472.2	7.9	2.7955e+06	2.86536e+06	6.57287e+06	6.65431e+06	1.03282e+07	8.32689e+06	1.54942e+07	7.0151e+06	1.25442e+07	1.35596e+07	8.71161e+06	3.53916e+06	4.29254e+06	5.60381e+06	3.40951e+06	3.87239e+06	8.30457e+06	5.16653e+06	3.67072e+06	1.18699e+07	8.3682e+06	2.68668e+06	8.92004e+06	5.58157e+06	3.8834e+06	5.07665e+06	4.49199e+06	6.19253e+06	3.92828e+06	3.45281e+06	4.41611e+06
M179T544	179.063	543.8	9.1	6.17718e+06	3.68136e+06	1.2885e+07	1.59046e+06	7.94546e+06	7.84963e+06	1.28928e+07	1.15307e+07	7.3794e+06	2.94513e+06	6.77219e+06	8.16741e+06	3.71894e+06	3.51055e+06	2.90845e+06	2.99979e+06	2.0063e+06	9.93553e+06	2.48809e+06	6.21267e+06	3.55786e+06	4.3215e+06	2.23425e+06	7.58584e+06	5.98379e+06	6.06563e+06	5.98796e+06	6.04041e+06	6.3745e+06	6.92131e+06	5.9384e+06
M179T576	179.118	575.9	9.6	1.17417e+06	483475	960999	1.0723e+06	1.98508e+06	1.55072e+06	768120	1.61055e+06	910182	1.02092e+06	1.99237e+06	847874	1.8425e+06	697459	930629	1.25428e+06	1.0677e+06	1.14037e+06	911690	1.94223e+06	1.00503e+06	1.33668e+06	945660	1.30509e+06	1.11825e+06	1.13096e+06	1.12308e+06	790318	1.1255e+06	1.01662e+06	1.02325e+06
M179T700	179.143	700.1	11.7	963677	498803	443210	935474	4.48094e+06	1.89251e+06	457630	1.15206e+06	2.73223e+06	3.22724e+06	3.12198e+06	5.34625e+06	6.80447e+06	1.24685e+06	2.66374e+06	2.49245e+06	1.7677e+06	5.46255e+06	6.1359e+06	1.73184e+06	885240	674287	3.20145e+06	3.49646e+06	1.95108e+06	1.81543e+06	1.7417e+06	2.46758e+06	1.77518e+06	1.78908e+06	1.80395e+06
M179T707	179.107	707.4	11.8	953276	2.10242e+06	940101	2.53633e+06	1.84126e+06	1.40475e+06	639461	1.54141e+06	2.88251e+06	2.59365e+06	2.1443e+06	1.88315e+06	2.26864e+06	664402	882052	1.66525e+06	1.78015e+06	4.15029e+06	1.91358e+06	3.57637e+06	630148	748936	2.95567e+06	3.65888e+06	811333	1.1426e+06	976278	987580	1.10673e+06	1.12947e+06	1.43246e+06
M179T72	179.496	71.8	1.2	298295	349703	2.60789e+06	2.19178e+06	347264	380156	2.43298e+06	2.39276e+06	247244	2.5321e+06	406077	425815	2.51492e+06	2.80703e+06	3.30454e+06	3.02869e+06	2.59658e+06	3.35828e+06	6.64322e+06	5.92103e+06	8.43605e+06	1.91993e+06	308757	3.62748e+06	2.63669e+06	2.63797e+06	2.64488e+06	2.63979e+06	2.70515e+06	2.63956e+06	2.85325e+06
M179T767	179.107	767.4	12.8	3.66657e+06	8.17745e+06	1.32172e+07	4.00658e+06	4.63772e+06	1.57297e+07	1.85268e+07	4.21638e+06	5.4079e+06	6.49011e+06	1.39395e+07	6.44658e+06	4.60376e+06	7.76685e+06	4.84118e+06	7.54556e+06	8.19378e+06	3.7456e+06	1.26582e+06	1.07125e+07	3.13507e+06	2.18373e+06	1.02619e+06	2.12934e+06	4.40061e+06	6.59503e+06	4.88783e+06	4.52631e+06	4.64234e+06	4.9448e+06	4.51696e+06
M179T794	179.107	794.1	13.2	3.16235e+07	1.89488e+07	4.73638e+07	4.52035e+07	2.17243e+07	3.97458e+07	3.49329e+07	2.22329e+07	4.56381e+07	4.88105e+07	5.02533e+07	5.51475e+07	1.83185e+07	4.45043e+07	2.77971e+07	1.60206e+07	2.91524e+07	2.38871e+07	3.45294e+07	1.93518e+07	3.8666e+07	2.36918e+07	3.78566e+07	3.00839e+07	2.89722e+07	4.07918e+07	2.09455e+07	3.39755e+07	3.39247e+07	3.41691e+07	3.37874e+07
M179T83	179.09	82.7	1.4	4.3466e+06	6.55377e+06	8.87858e+06	8.8295e+06	4.95632e+06	5.71467e+06	1.35374e+07	1.14818e+07	7.50963e+06	9.27635e+06	6.01361e+06	9.14302e+06	8.39435e+06	9.56167e+06	7.86061e+06	6.45454e+06	7.6879e+06	6.41234e+06	8.77131e+06	5.91902e+06	8.41885e+06	8.48942e+06	6.24899e+06	8.09719e+06	1.63548e+06	1.64929e+06	1.70482e+06	1.65964e+06	1.84793e+06	2.86637e+06	1.69431e+06
M179T92	179.129	92	1.5	5.561e+06	2.61699e+07	3.23409e+07	2.86098e+07	6.30649e+06	6.1376e+06	2.80772e+07	2.28698e+07	3.12146e+07	4.33476e+07	3.88778e+07	4.26436e+07	4.26156e+07	3.86909e+07	3.61205e+07	4.50789e+07	4.35236e+06	4.47523e+07	4.59732e+06	4.11889e+06	3.92547e+06	4.1291e+07	3.30584e+07	3.46106e+07	2.56482e+07	2.71801e+07	2.21019e+07	2.57006e+07	2.76114e+07	2.72219e+07	1.2195e+07
M179T96	179.129	96.5	1.6	1.27767e+07	3.52746e+06	2.02267e+07	4.85227e+06	2.61245e+07	1.42229e+07	2.14017e+07	3.55196e+07	1.73807e+07	2.38048e+07	1.91945e+07	3.40681e+07	4.72274e+07	2.80287e+07	4.44975e+07	3.0221e+07	2.6213e+07	2.30732e+07	2.63592e+07	4.99728e+06	3.66002e+07	1.06014e+07	3.90182e+07	1.98706e+07	2.64593e+07	2.45533e+07	2.6528e+07	2.45759e+07	2.89219e+07	2.0177e+07	3.35101e+07
[truncated: 15,001 more rows]
