# Supplementary material for: The impact of dapagliflozin for the myocardial metabolomic profiles of mice with chronic heart failure induced by a high fat diet
Source: Research Square preprint supplement (doi:10.21203/rs.3.rs-6881055/v1), 2025-06-25
Supplement: Supplementary file 8 [file 6b17b45397857b9bb6a99244.xlsx]

## Sheet: Sheet1
First-level name	Name	Mass-to-charge ratio	Retention times(min)	Exact_mass	Molecular weight error(ppm)	Formula	Precursor_type	Class	Sub_class	KEGG	KEGG_Pathway	CAS serial number	HMDB serial number	Library	Level	Detection mode	Chow1	Chow2	Chow3	Chow4	Chow5	Chow6	Chow7	Chow8	HDF1	HDF3	HDF4	HDF5	HDF6	HDF7	HDF8	DAPA1	DAPA2	DAPA3	DAPA4	DAPA6	DAPA7	DAPA8	DAPA5	HDF2
M516T594_1	Ciliatocholate	516.296	594	515.301	23.5828	C26H46NO7P	[M+H]+	Carboxylic acids and derivatives	Alcohols and polyols	C05683	Metabolism of other amino acids	13222-48-5		MetaDNA	2	pos	2.73687e+06	4.29357e+06	1.59609e+06	1.67385e+06	2.36206e+06	1.28601e+06	4.19039e+06	2.93642e+06	1.89809e+06	4.48035e+06	3.17654e+06	5.22914e+06	2.30492e+06	4.52381e+06	5.66181e+06	645845	4.73203e+06	7.65554e+06	1.86996e+06	1.63482e+06	1.57509e+06	4.92846e+06	6.75339e+06	4.78319e+06
M614T121	Cytidine monophosphate N-acetylneuraminic acid	614.145	121.5	614.147	3.09372	C20H31N4O16P	[M]+	Azacyclic compounds	Alcohols and polyols	C00128	Carbohydrate metabolism; Glycan biosynthesis and metabolism; Global and overview maps	22-12-8/3063-71-6	HMDB0001176	MetaDNA	2	pos	3.3748e+07	1.91871e+07	2.75689e+07	2.97482e+07	1.74862e+07	1.21979e+07	2.929e+07	3.03583e+07	4.8565e+07	3.91761e+07	4.38028e+07	3.99283e+07	2.7545e+07	2.77986e+07	4.13925e+07	2.51924e+07	4.29077e+07	3.18323e+07	2.41504e+07	4.26359e+07	4.00821e+07	3.41462e+07	2.52926e+07	3.68274e+07
M447T89	CDP-Ethanolamine	447.067	89	446.06	2.18311	C11H20N4O11P2	[M+H]+	Azacyclic compounds	Alcohols and polyols	C00570	Lipid metabolism; Global and overview maps	3036-18-8	HMDB0001564	MetaDNA	2	pos	6.08662e+06	8.6179e+06	7.3106e+06	6.6689e+06	6.15266e+06	6.42412e+06	6.91895e+06	6.11513e+06	4.49816e+06	7.13522e+06	5.10106e+06	7.46227e+06	6.5391e+06	4.59963e+06	4.83809e+06	1.04026e+07	584343	8.46759e+06	5.79467e+06	3.76336e+06	844741	918144	5.96972e+06	1.14928e+07
M161T77	N(6)-Methyllysine	161.128	77.1	160.121	0.471673	C7H16N2O2	[M+H]+	Carboxylic acids and derivatives	Amines	C02728		1188-07-4/7622-29-9	HMDB0002038	MetaDNA	2	pos	8.89587e+06	3.68438e+06	4.57719e+06	7.15623e+06	9.81264e+06	2.63269e+06	5.98138e+06	7.6819e+06	9.38246e+06	1.01706e+07	1.09879e+07	4.14137e+06	1.18937e+07	9.52519e+06	1.37556e+07	9.91666e+06	4.61114e+06	9.6962e+06	1.12185e+07	1.46736e+07	8.50299e+06	2.63944e+06	5.35615e+06	1.29601e+07
M626T712_2	Leukotriene C4	626.314	711.6	625.303	5.78627	C30H47N3O9S	[M+H]+	Carboxylic acids and derivatives	Alcohols and polyols	C02166	Nervous system; Digestive system; Lipid metabolism; Signaling molecules and interaction; Immune disease; Immune system; Global and overview maps	72025-60-6		MetaDNA	2	pos	2.01919e+06	4.39573e+06	2.41389e+06	5.03876e+06	5.84693e+06	2.47687e+06	5.99002e+06	5.76485e+06	5.07787e+06	1.85221e+06	5.08023e+06	2.1756e+06	1.93916e+06	5.63487e+06	8.59045e+06	2.67774e+06	7.86594e+06	6.73169e+06	6.82665e+06	6.94174e+06	4.64351e+06	2.32373e+06	2.13436e+06	2.93591e+06
M237T341	L-Formylkynurenine	237.087	341.3	236.08	1.78837	C11H12N2O4	[M+H]+	Benzene and substituted derivatives	Amines	C02700	Amino acid metabolism; Global and overview maps	1022-31-7	HMDB0060485	MetaDNA	2	pos	3.43596e+06	2.88951e+06	3.817e+06	4.36511e+06	2.25072e+06	5.23464e+06	3.68626e+06	3.30123e+06	3.16621e+06	7.31e+06	6.65658e+06	4.75974e+06	5.15163e+06	5.10912e+06	7.73384e+06	4.89936e+06	7.15387e+06	6.30411e+06	4.0895e+06	5.16644e+06	8.04951e+06	8.17792e+06	9.50939e+06	9.19236e+06
M357T706	3-Oxo-5beta-cholanate	357.275	705.6	374.282	0.934855	C24H38O3	[M+H-H2O]+	Carboxylic acids and derivatives	Bile acids, alcohols and derivatives	C03070		1553-56-6		MetaDNA	2	pos	541808	500333	714826	846362	492616	325777	607937	882794	801752	720976	853943	964557	920386	809804	472013	1.14357e+06	745736	499114	442764	766206	702337	745532	639102	856548
M175T103_1	Formiminoglutamic acid	175.071	103.4	174.064	0.137087	C6H10N2O4	[M+H]+	Carboxylic acids and derivatives	Amidines	C00439	Amino acid metabolism; Global and overview maps	816-90-0	HMDB0000854	MetaDNA	2	pos	1.58128e+07	1.2692e+07	1.89552e+07	1.78932e+07	1.63208e+07	1.60635e+07	1.97253e+07	1.84333e+07	1.68284e+07	1.54187e+07	1.8703e+07	1.385e+07	1.82038e+07	1.29471e+07	1.37506e+07	1.85277e+07	1.45535e+07	1.91704e+07	1.39901e+07	1.63399e+07	1.79596e+07	1.5628e+07	1.47312e+07	1.72661e+07
M600T755_2	5-Oxoavermectin ''2a'' aglycone	600.333	755.4	600.33	4.6641	C34H48O9	[M]+			C11970	Metabolism of terpenoids and polyketides			MetaDNA	2	pos	3.09321e+06	1.5417e+07	9.47997e+06	4.33823e+06	2.03056e+07	1.51862e+07	1.04165e+07	1.05043e+07	9.6334e+06	2.3725e+07	1.11238e+07	1.61689e+07	1.8262e+07	1.85518e+07	2.11865e+07	6.79707e+06	2.05068e+07	7.70701e+06	2.06397e+07	1.79179e+07	1.69341e+07	1.50627e+07	1.38632e+07	2.39899e+07
M513T785_1	L-Oleandrosyl-oleandolide	513.317	785.3	530.309	29.4836	C27H46O10	[M+H-H2O]+	Carboxylic acids and derivatives	Alcohols and polyols	C11992	Global and overview maps; Metabolism of terpenoids and polyketides			MetaDNA	2	pos	1.24781e+07	1.29346e+07	3.53733e+07	6.01384e+07	1.30928e+07	2.20236e+07	1.281e+08	7.53926e+07	2.79455e+07	3.41691e+07	5.04351e+07	1.43147e+07	5.23459e+07	2.35286e+07	2.12161e+07	7.3268e+07	1.96654e+07	6.00142e+07	2.23068e+07	8.27453e+07	7.77521e+06	6.64399e+06	4.5943e+07	3.50891e+07
M572T828	6,8a-Seco-6,8a-deoxy-5-oxoavermectin ''2b'' aglycone	572.345	828.1	572.335	17.8217	C33H48O8	[M]+			C11953	Metabolism of terpenoids and polyketides			MetaDNA	2	pos	2.31618e+07	1.90223e+07	2.9264e+07	1.8034e+07	1.8153e+07	1.2331e+07	2.59091e+07	3.82444e+07	1.1841e+07	2.10708e+07	2.42647e+07	1.70483e+07	3.56276e+07	3.18568e+07	1.70688e+06	2.85688e+07	1.76378e+07	2.00672e+07	2.01774e+07	2.57274e+07	3.29908e+07	2.76744e+07	2.51561e+07	5.49056e+06
M585T758	Avermectin A2b aglycone	585.344	757.6	602.346	10.8211	C34H50O9	[M+H-H2O]+	Carboxylic acids and derivatives	Alcohols and polyols	C11956	Metabolism of terpenoids and polyketides			MetaDNA	2	pos	8.06866e+06	4.92122e+06	6.70765e+06	8.73105e+06	4.79801e+06	8.28484e+06	1.06085e+07	9.88125e+06	8.95215e+06	9.45069e+06	9.92482e+06	5.79656e+06	5.97413e+06	5.05159e+06	4.0703e+06	7.84007e+06	9.94803e+06	6.22496e+06	9.4701e+06	1.06226e+07	1.03883e+07	1.00435e+07	5.74718e+06	5.4059e+06
M164T707	Acetylcysteine	164.042	706.7	163.03	28.7975	C5H9NO3S	[M+H]+	Carboxylic acids and derivatives	Amino acids, peptides, and analogues	C06809		616-91-1	HMDB0001890	BioDeepDB	2	pos	3.32123e+06	4.71861e+06	7.64462e+06	2.8893e+06	3.51678e+06	3.45137e+06	3.37031e+06	4.82366e+06	4.41464e+06	3.17565e+06	3.04542e+06	3.96863e+06	745520	6.2588e+06	7.18213e+06	5.0279e+06	7.39968e+06	5.31486e+06	6.01255e+06	6.56062e+06	6.86776e+06	4.85459e+06	4.33757e+06	5.65522e+06
M171T65	Dihydroxyacetone phosphate	171.148	65.3	169.998	4.81539	C3H7O6P	[M+H]+	Organooxygen compounds	Carbohydrates and carbohydrate conjugates	C00111	Metabolism of cofactors and vitamins; Carbohydrate metabolism; Lipid metabolism; Energy metabolism; Global and overview maps	57-04-5	HMDB0001473	BioDeepDB	2	pos	2.50406e+07	2.00944e+07	1.70412e+07	2.33338e+07	1.71891e+07	2.36283e+07	3.17517e+07	3.34805e+07	1.64863e+07	3.37443e+07	4.24451e+07	2.13393e+07	2.46787e+07	2.27574e+07	3.8651e+07	2.62002e+07	2.35153e+07	2.17168e+07	2.87457e+07	2.79419e+07	2.13075e+07	3.61258e+07	2.04312e+07	2.98039e+07
M146T68	Spermidine	146.165	68	145.158	0.00423974	C7H19N3	[M+H]+	Organonitrogen compounds	Amines	C00315	Membrane transport; Metabolism of other amino acids; Digestive system; Biosynthesis of other secondary metabolites; Metabolism of terpenoids and polyketides; Amino acid metabolism; Global and overview maps	124-20-9	HMDB0001257	BioDeepDB	2	pos	1.96057e+06	9.42865e+06	2.42075e+06	2.35625e+06	2.48228e+06	4.91106e+06	6.85177e+06	6.76463e+06	4.98333e+06	2.77898e+06	7.95888e+06	2.39237e+06	1.57347e+06	5.81917e+06	5.06568e+06	4.65536e+06	1.997e+06	3.32931e+06	4.17211e+06	8.08632e+06	2.71212e+06	2.16542e+06	2.66516e+06	2.5072e+06
M187T62	Undecanoic acid	186.955	62.3	186.162	7.58083	C11H22O2	[M+H]+	Fatty Acyls	Fatty acids and conjugates	C17715		112-37-8	HMDB0000947	BioDeepDB	2	pos	2.94537e+07	8.0075e+06	2.61232e+07	3.08722e+07	3.0812e+07	2.57602e+07	2.95763e+07	3.62832e+07	1.81138e+07	2.02055e+07	2.99418e+07	4.13799e+07	3.11336e+07	1.92292e+07	2.70328e+07	2.76798e+07	2.42274e+07	4.90393e+07	1.22284e+08	5.137e+07	3.65166e+07	2.79532e+07	2.82656e+07	3.01309e+07
M131T474	Ketoleucine	131.081	473.9	130.063	2.89499	C6H10O3	[M+H]+	Keto acids and derivatives	Short-chain keto acids and derivatives	C00233	Amino acid metabolism; Biosynthesis of other secondary metabolites; Global and overview maps	816-66-0	HMDB0000695	BioDeepDB	2	pos	8.77641e+06	1.40801e+07	7.56053e+06	8.28321e+06	8.50432e+06	6.21777e+06	1.14254e+07	7.22604e+06	9.82113e+06	1.24399e+07	1.9879e+07	9.80177e+06	6.58332e+06	6.70715e+06	9.63972e+06	1.13672e+07	9.30888e+06	9.96342e+06	1.17527e+07	5.44339e+06	1.03263e+07	9.37917e+06	7.37508e+06	1.06166e+07
M159T36	Allantoin	158.96	35.7	158.044	21.342	C4H6N4O3	[M+H]+	Azoles	Imidazoles	C01551		97-59-6	HMDB0000462	BioDeepDB	2	pos	6.18442e+07	9.47714e+07	8.66083e+07	1.01338e+08	2.30889e+07	8.38758e+07	2.05064e+07	1.08423e+08	1.79225e+07	1.74271e+07	2.14496e+07	4.74402e+07	1.13227e+08	2.10489e+07	7.51631e+07	9.56353e+07	1.48409e+07	1.23569e+08	5.09164e+07	9.57649e+07	1.60731e+07	7.44128e+06	6.1783e+07	9.1516e+07
M183T69	Sorbitol	182.987	68.7	182.079	0.609327	C6H14O6	[M+H]+	Organooxygen compounds	Carbohydrates and carbohydrate conjugates	C00794	Carbohydrate metabolism; Membrane transport; Global and overview maps	50-70-4	HMDB0000247	BioDeepDB	2	pos	5.72407e+07	1.89618e+07	9.26882e+07	2.52678e+07	8.43862e+07	7.45919e+07	2.47345e+07	1.14216e+08	7.35222e+07	5.1453e+07	5.87273e+07	8.52888e+07	1.08478e+08	1.55331e+07	8.61226e+07	2.84415e+07	2.09767e+07	8.70419e+07	7.25949e+07	2.43675e+07	1.25749e+08	5.60315e+07	1.40354e+08	1.20916e+08
M282T122	1-Methyladenosine	282.118	121.5	281.112	5.05399	C11H15N5O4	[M+H]+	Purine nucleosides		C02494		15763-06-1	HMDB0003331	BioDeepDB	2	pos	1.44838e+06	4.1143e+07	3.60572e+07	1.41157e+06	1.43975e+06	1.79709e+06	4.154e+07	3.34726e+07	3.10986e+07	992582	4.57638e+07	2.50765e+07	1.66576e+06	3.57007e+07	3.12434e+07	1.36269e+06	1.70182e+06	3.7971e+07	4.0684e+07	6.34561e+07	6.29035e+07	5.53718e+07	4.10771e+07	2.87504e+07
M200T648	Dodecanoic acid	200.165	647.7	200.178	2.49063	C12H24O2	[M]+	Fatty Acyls	Fatty acids and conjugates	C02679	Lipid metabolism; Biosynthesis of other secondary metabolites; Global and overview maps	143-07-7	HMDB0000638	BioDeepDB	2	pos	1.52248e+07	4.7433e+06	1.26048e+07	1.81833e+07	1.97208e+07	4.51967e+07	1.03406e+07	1.66465e+07	1.53878e+07	6.15269e+06	1.30513e+07	7.2388e+06	7.0284e+06	6.48111e+06	1.26726e+07	2.83829e+07	2.17077e+07	2.19383e+07	1.94247e+07	2.0073e+07	1.6706e+07	6.78378e+06	8.54171e+06	1.1214e+07
M158T59	4,5-Dihydroorotic acid	158.002	58.9	158.033	5.19765	C5H6N2O4	[M]+	Carboxylic acids and derivatives	Amino acids, peptides, and analogues	C00337	Global and overview maps; Nucleotide metabolism	155-54-4 / 5988-19-2	HMDB0000528	BioDeepDB	2	pos	1.67825e+07	1.40182e+07	1.35029e+07	2.12067e+07	1.30083e+07	1.80116e+07	1.36225e+07	1.23408e+07	1.51321e+07	1.28238e+07	2.02556e+07	1.56147e+07	2.09722e+07	2.02819e+07	2.42769e+07	1.4561e+07	2.03729e+07	2.23434e+07	1.72791e+07	1.39231e+07	1.67796e+07	1.55468e+07	1.5419e+07	1.1621e+07
M324T111_1	CMP	324.058	111.3	323.052	2.56772	C9H14N3O8P	[M+H]+	Pyrimidine nucleotides	Pyrimidine ribonucleotides	C00055	Global and overview maps; Nucleotide metabolism	63-37-6	HMDB0000095	BioDeepDB	2	pos	3.50738e+06	1.91013e+07	1.49145e+07	2.13974e+06	1.64504e+06	3.22e+06	8.84633e+06	3.32512e+07	1.29093e+07	2.32059e+06	2.14951e+07	3.37482e+06	2.00989e+06	9.75575e+06	3.80017e+06	3.41819e+06	3.43477e+06	4.05269e+07	1.73181e+07	2.28129e+07	9.63155e+06	3.43552e+07	4.26934e+07	2.67255e+06
M283T408	Oleic acid	283.175	407.8	282.256	1.52205	C18H34O2	[M+H]+	Fatty Acyls	Fatty acids and conjugates	C00712	Lipid metabolism; Chemical structure transformation maps; Aging	112-80-1	HMDB0000207	BioDeepDB	2	pos	2.77824e+07	3.5846e+07	2.65385e+07	7.55966e+07	4.77106e+07	4.06667e+07	5.23813e+07	4.88903e+07	6.71625e+07	2.70576e+07	3.03786e+07	4.89987e+07	3.19596e+07	3.52055e+07	2.38482e+07	2.41893e+07	6.26196e+07	3.71073e+07	6.21922e+06	4.23568e+07	2.66407e+07	4.44854e+07	1.79347e+07	3.1637e+07
M281T773	Linoleic acid	281.247	773.4	280.24	1.69246	C18H32O2	[M+H]+	Fatty Acyls	Lineolic acids and derivatives	C01595	Lipid metabolism; Chemical structure transformation maps; Global and overview maps	60-33-3	HMDB0000673	BioDeepDB	2	pos	9.12695e+06	5.09438e+07	2.77655e+07	1.66763e+07	3.64591e+07	2.24077e+07	5.05831e+07	1.53075e+07	2.93844e+07	2.21631e+07	2.57778e+07	3.81642e+07	2.34741e+07	1.08731e+07	2.82278e+07	2.4974e+07	1.26419e+07	2.15363e+07	3.55141e+07	6.43683e+07	3.94935e+07	4.33383e+07	3.02217e+07	8.27021e+06
M101T119	Triethylamine	101.06	118.6	101.12	2.18944	C6H15N	[M]+	Amines	Tertiary amines	C14691		121-44-8	HMDB0032539	BioDeepDB	2	pos	7.63987e+06	7.06789e+06	7.90745e+06	7.89086e+06	9.09562e+06	9.35554e+06	8.55152e+06	7.9619e+06	8.69293e+06	7.96347e+06	7.02935e+06	7.52658e+06	8.0358e+06	6.94175e+06	1.00949e+07	9.06184e+06	8.21064e+06	9.35127e+06	7.94577e+06	7.65529e+06	8.67791e+06	7.65798e+06	8.00223e+06	8.03763e+06
M102T65	Isovaleric acid	102.127	64.6	102.068	6.99641	C5H10O2	[M]+	Fatty Acyls	Fatty acids and conjugates	C08262	Chemical structure transformation maps; Global and overview maps; Digestive system	503-74-2	HMDB0000718	BioDeepDB	2	pos	5.83772e+07	3.84527e+07	1.08021e+08	2.25118e+08	2.74784e+07	3.90747e+07	3.31456e+07	1.23766e+08	1.4144e+08	6.55741e+07	3.15774e+07	1.44994e+08	9.33752e+07	1.32496e+08	3.165e+07	2.72835e+07	1.05532e+08	3.2067e+07	1.25726e+08	1.35038e+08	1.26848e+08	1.29016e+08	8.66013e+07	1.23558e+08
M278T457	Gamma-Linolenic acid	278.185	456.6	278.225	0.916737	C18H30O2	[M]+	Fatty Acyls	Lineolic acids and derivatives	C06426	Lipid metabolism; Global and overview maps	506-26-3	HMDB0003073	BioDeepDB	2	pos	1.15405e+07	8.50267e+06	7.52333e+06	7.77653e+06	5.74674e+06	7.69663e+06	7.08293e+06	8.78784e+06	9.45114e+06	4.21747e+06	6.29797e+06	8.40135e+06	1.08437e+07	5.21735e+06	1.39369e+07	8.55909e+06	5.20329e+06	4.00119e+06	4.30974e+06	3.78773e+06	6.37102e+06	4.53151e+06	4.48062e+06	1.3588e+07
M110T67	Catechol	110.021	66.9	110.037	1.89253	C6H6O2	[M]+			C00090	Xenobiotics biodegradation and metabolism; Global and overview maps	120-80-9 / 12385-08-9		BioDeepDB	2	pos	1.32269e+07	1.34207e+07	1.23731e+07	1.34599e+07	1.28231e+07	1.40832e+07	1.38365e+07	1.35121e+07	1.34766e+07	1.38104e+07	1.3202e+07	1.40209e+07	1.33737e+07	1.31878e+07	1.32285e+07	1.40534e+07	1.38626e+07	1.2664e+07	1.31305e+07	1.34477e+07	1.38495e+07	1.30844e+07	1.38612e+07	1.34792e+07
M130T155	Pipecolic acid	130.05	155.2	129.079	20.2747	C6H11NO2	[M+H]+	Carboxylic acids and derivatives	Amino acids, peptides, and analogues	C00408	Chemical structure transformation maps; Amino acid metabolism; Biosynthesis of other secondary metabolites; Global and overview maps	535-75-1 / 3105-95-1	HMDB0000070	BioDeepDB	2	pos	1.13985e+07	1.68719e+08	1.79749e+08	7.51078e+06	1.18576e+07	3.50938e+07	3.07662e+07	1.71178e+08	7.34343e+07	7.06389e+06	1.33831e+08	3.68878e+07	2.26741e+07	6.32946e+07	1.46736e+08	2.95308e+07	1.37889e+07	8.12731e+07	1.31417e+08	6.61962e+07	1.39663e+08	1.37525e+08	2.40828e+08	7.02099e+07
M169T137_2	Uric acid	169.036	136.9	168.028	0.733573	C5H4N4O3	[M+H]+	Imidazopyrimidines	Purines and purine derivatives	C00366	Global and overview maps; Nucleotide metabolism; Digestive system	69-93-2	HMDB0000289	BioDeepDB	2	pos	1.94574e+06	1.02959e+07	9.12161e+06	5.56187e+06	1.45266e+07	1.82707e+06	2.96318e+06	7.88464e+06	9.99905e+06	9.82634e+06	1.1759e+07	8.0795e+06	1.77113e+06	7.53317e+06	6.57177e+06	6.445e+06	1.62877e+06	1.95831e+06	1.63436e+06	3.62837e+06	5.39559e+06	4.6571e+06	4.56109e+06	7.70301e+06
M242T356	Equol	242.1	356.4	242.094	22.23	C15H14O3	[M]+	Isoflavonoids	Isoflavans	C14131		531-95-3	HMDB0002209	BioDeepDB	2	pos	4.12418e+07	2.54517e+07	9.0661e+06	6.15651e+07	1.61141e+07	2.76609e+07	6.42578e+07	2.19372e+07	2.09014e+07	3.47639e+07	2.88313e+07	1.56782e+07	1.49415e+07	2.4785e+07	2.72217e+07	2.49521e+07	1.19678e+07	2.71019e+07	1.80333e+07	2.94509e+06	8.33211e+06	6.32259e+06	1.88004e+07	1.38021e+07
M148T100	L-Glutamic acid	148.06	99.7	147.053	0.0378681	C5H9NO4	[M+H]+	Carboxylic acids and derivatives	Amino acids, peptides, and analogues	C00025	Neurodegenerative disease; Biosynthesis of other secondary metabolites; Substance dependence; Cellular community - eukaryotes; Energy metabolism; Metabolism of other amino acids; Excretory system; Carbohydrate metabolism; Cancer: overview; Membrane transport; Cell growth and death; Signal transduction; Nervous system; Digestive system; Environmental adaptation; Amino acid metabolism; Chemical str…	56-86-0	HMDB0000148	BioDeepDB	2	pos	2.70121e+07	1.57755e+07	3.60014e+07	4.27515e+07	3.83656e+07	2.78415e+07	4.05166e+07	2.14577e+07	1.73728e+07	5.24144e+07	2.62431e+07	3.8086e+07	3.78625e+07	3.67348e+07	4.45496e+07	2.05141e+07	4.11536e+07	4.20076e+07	3.01605e+07	5.02206e+07	3.98328e+07	4.35597e+07	4.17203e+07	4.50414e+07
M339T114_1	AICAR	339.069	113.8	338.063	2.87847	C9H15N4O8P	[M+H]+	Imidazole ribonucleosides and ribonucleotides	1-ribosyl-imidazolecarboxamides	C04677	Signal transduction; Nucleotide metabolism; Amino acid metabolism; Chemical structure transformation maps; Global and overview maps	3031-94-5	HMDB0001517	BioDeepDB	2	pos	2.35138e+07	2.17326e+07	2.80425e+07	9.72904e+06	1.49787e+07	1.16692e+07	4.7983e+07	2.33281e+07	1.41813e+07	1.35191e+07	1.60597e+07	9.98002e+06	1.49142e+07	2.53899e+07	1.08043e+07	1.29447e+07	1.84077e+07	2.42233e+07	2.71381e+07	1.73069e+07	2.07209e+07	1.1733e+07	1.56568e+07	9.03536e+06
M167T72	L-4-Hydroxyphenylglycine	167.013	72.1	167.058	1.0646	C8H9NO3	[M]+			C12323	Biosynthesis of other secondary metabolites; Global and overview maps; Metabolism of terpenoids and polyketides	32462-30-9		BioDeepDB	2	pos	3.94775e+07	5.87845e+07	6.86438e+07	3.57902e+07	4.15721e+07	3.54809e+07	5.08953e+07	4.67724e+07	3.96787e+07	5.41063e+07	4.68637e+07	4.12281e+07	3.7957e+07	3.04845e+07	3.55403e+07	3.72845e+07	4.26102e+07	4.23301e+07	4.14349e+07	3.72039e+07	4.28286e+07	3.77224e+07	3.09978e+07	3.32003e+07
M126T72	Ciliatine	125.986	72.2	125.024	4.17895	C2H8NO3P	[M+H]+	Organic phosphonic acids and derivatives	Organic phosphonic acids	C03557	Membrane transport; Metabolism of other amino acids; Global and overview maps	2041-14-7	HMDB0011747	BioDeepDB	2	pos	1.44915e+08	1.45846e+08	1.50756e+08	1.37332e+08	1.35354e+08	1.52768e+08	1.68276e+08	8.8698e+07	1.46614e+08	1.4922e+08	1.48366e+08	1.31982e+08	1.58881e+08	1.2029e+08	1.52591e+08	1.47687e+08	1.39961e+08	1.41822e+08	1.57327e+08	1.56914e+08	1.56476e+08	1.34927e+08	1.4307e+08	1.37896e+08
M147T113	L-Lysine	147.077	113.2	146.106	6.11511	C6H14N2O2	[M+H]+	Carboxylic acids and derivatives	Amino acids, peptides, and analogues	C00047	Metabolism of cofactors and vitamins; Digestive system; Biosynthesis of other secondary metabolites; Translation; Amino acid metabolism; Chemical structure transformation maps; Global and overview maps	56-87-1	HMDB0000182	BioDeepDB	2	pos	1.23849e+07	1.21762e+07	1.90246e+07	5.9132e+06	4.01072e+07	1.9389e+07	4.75434e+07	3.56778e+07	5.67906e+07	6.81572e+07	5.81004e+07	5.07514e+07	4.48068e+07	4.46086e+07	5.39801e+07	4.82073e+07	5.07752e+07	4.93926e+07	4.94785e+07	4.50321e+07	4.73555e+07	4.80851e+07	4.35522e+07	5.24027e+07
M302T782	Sphinganine	302.305	781.6	301.298	0.0762332	C18H39NO2	[M+H]+	Organonitrogen compounds	Amines	C00836	Lipid metabolism; Signal transduction; Global and overview maps	764-22-7	HMDB0000269	BioDeepDB	2	pos	6.70769e+07	5.28044e+07	1.48523e+08	6.00004e+07	9.232e+07	1.07728e+08	4.58428e+07	5.10341e+07	3.36279e+07	4.59739e+07	6.26218e+07	4.25029e+07	1.04792e+08	7.94167e+07	5.49735e+06	1.07618e+08	7.65202e+07	9.11874e+07	1.70493e+08	5.33856e+07	7.95896e+07	3.61219e+07	1.17962e+08	9.80612e+06
M175T83_1	L-Arginine	175.119	83.2	174.112	0.29165	C6H14N4O2	[M+H]+	Carboxylic acids and derivatives	Amino acids, peptides, and analogues	C00062	Cancer: overview; Membrane transport; Neurodegenerative disease; Biosynthesis of other secondary metabolites; Translation; Amino acid metabolism; Chemical structure transformation maps; Infectious disease: parasitic; Global and overview maps	74-79-3	HMDB0000517	BioDeepDB	2	pos	3.81804e+08	3.65965e+08	4.33042e+08	9.91884e+07	1.00833e+08	3.69375e+08	6.1522e+08	3.95264e+08	5.72471e+08	2.97905e+08	3.44289e+08	3.26684e+08	4.81174e+08	3.62509e+08	2.79838e+08	3.64685e+08	7.62822e+08	4.31566e+08	4.3481e+08	2.87699e+08	3.73692e+08	3.31782e+08	3.56093e+08	4.3221e+08
M613T168_2	Oxidized glutathione	613.162	168.3	612.152	3.79204	C20H32N6O12S2	[M+H]+	Carboxylic acids and derivatives	Amino acids, peptides, and analogues	C00127	Cell growth and death; Metabolism of other amino acids; Global and overview maps; Endocrine system	27025-41-8	HMDB0003337	BioDeepDB	2	pos	1.25232e+08	1.34707e+08	1.13003e+08	1.4094e+08	7.66685e+07	1.65489e+08	1.12306e+08	4.74455e+07	1.59353e+08	2.17018e+08	1.61528e+08	4.60714e+07	9.81464e+07	9.24487e+07	1.0348e+08	4.87756e+07	1.0834e+08	1.17978e+08	1.04423e+08	5.19598e+07	1.46961e+08	6.1203e+07	9.9337e+07	3.90459e+07
M106T84	L-Serine	106.05	84.5	105.043	0.226309	C3H7NO3	[M+H]+	Carboxylic acids and derivatives	Amino acids, peptides, and analogues	C00065	Cancer: overview; Membrane transport; Metabolism of other amino acids; Chemical structure transformation maps; Drug resistance: antimicrobial; Signal transduction; Digestive system; Lipid metabolism; Carbohydrate metabolism; Biosynthesis of other secondary metabolites; Translation; Amino acid metabolism; Energy metabolism; Global and overview maps	56-45-1	HMDB0000187	BioDeepDB	2	pos	6.46533e+07	7.08871e+07	6.50111e+07	8.01438e+07	6.77565e+07	5.74118e+07	7.82454e+07	7.35343e+07	6.73003e+07	9.92476e+07	7.67242e+07	7.21808e+07	7.06107e+07	1.01905e+08	1.00992e+08	1.2094e+08	1.09044e+08	1.26549e+08	1.55734e+08	7.8728e+07	1.29168e+08	1.54287e+08	1.53242e+08	1.39813e+08
M133T85	L-Asparagine	133.061	84.6	132.054	0.931904	C4H8N2O3	[M+H]+	Carboxylic acids and derivatives	Amino acids, peptides, and analogues	C00152	Cancer: overview; Metabolism of other amino acids; Digestive system; Translation; Amino acid metabolism; Chemical structure transformation maps; Global and overview maps	2058-58-4	HMDB0033780	BioDeepDB	2	pos	5.0344e+07	4.41245e+07	3.86334e+07	4.49377e+07	5.01013e+07	4.04862e+07	4.56636e+07	4.16315e+07	5.15204e+07	6.73671e+07	4.66385e+07	3.09557e+07	5.48844e+07	1.58323e+07	5.76995e+07	1.9941e+07	4.61691e+07	5.44162e+07	6.35307e+07	1.49411e+07	6.2587e+07	6.04808e+07	4.87445e+07	5.6205e+07
M188T312	Homo-L-arginine	188.128	312.4	188.127	3.72087	C7H16N4O2	[M]+	Carboxylic acids and derivatives	Amino acids, peptides, and analogues	C01924		156-86-5	HMDB0000670	MoNA	2	pos	6.95299e+06	6.57261e+06	6.39132e+06	5.53017e+06	5.27935e+06	5.26436e+06	6.7164e+06	7.07425e+06	6.16085e+06	8.68717e+06	8.60343e+06	7.93738e+06	5.16304e+06	7.34903e+06	6.94681e+06	5.41604e+06	6.01595e+06	6.24615e+06	6.37529e+06	4.06264e+06	6.73104e+06	7.07145e+06	8.34817e+06	1.07423e+07
M104T86	gamma-Aminobutyric acid	104.107	85.6	103.063	2.72535	C4H9NO2	[M+H]+	Carboxylic acids and derivatives	Amino acids, peptides, and analogues	C00334	Metabolism of cofactors and vitamins; Metabolism of other amino acids; Signal transduction; Nervous system; Sensory system; Endocrine system; Carbohydrate metabolism; Signaling molecules and interaction; Amino acid metabolism; Cellular community - prokaryotes; Global and overview maps	56-12-2	HMDB0000112	BioDeepDB	2	pos	3.9607e+08	1.14059e+09	1.21045e+09	3.56659e+08	1.20832e+09	1.02186e+09	1.22955e+09	1.20357e+09	1.34219e+09	1.50368e+09	1.59087e+09	1.3649e+09	1.22964e+09	1.30358e+09	1.49168e+09	1.37122e+09	1.5142e+09	1.6595e+09	1.45917e+09	2.08916e+09	1.34183e+09	1.27466e+09	8.82461e+08	1.30468e+09
M209T334	L-Kynurenine	209.092	333.6	208.085	0.114782	C10H12N2O3	[M+H]+	Organooxygen compounds	Carbonyl compounds	C00328	Amino acid metabolism; Infectious disease: parasitic; Global and overview maps	2922-83-0 / 343-65-7	HMDB0000684	BioDeepDB	2	pos	5.46583e+06	5.69825e+06	6.19018e+06	2.31342e+06	4.3994e+06	4.98762e+06	2.42735e+07	6.13525e+06	2.53642e+06	1.12343e+07	4.15474e+06	2.91012e+06	961158	1.58027e+06	3.16736e+06	8.37737e+06	2.9213e+06	1.87565e+06	6.09269e+06	6.61298e+06	1.1279e+06	5.49678e+06	1.57289e+07	4.95759e+06
M228T768	Deoxyuridine	228.195	767.7	228.075	3.08652	C9H12N2O5	[M]+	Pyrimidine nucleosides	Pyrimidine 2'-deoxyribonucleosides	C00526	Membrane transport; Global and overview maps; Nucleotide metabolism	951-78-0	HMDB0000012	BioDeepDB	2	pos	2.06373e+07	7.89403e+06	3.0836e+07	2.13383e+07	1.19889e+07	2.05218e+07	1.63214e+07	3.97982e+07	3.46873e+07	4.55486e+07	5.83738e+07	3.85454e+07	5.35388e+07	3.17239e+07	2.53069e+07	2.59992e+07	3.12322e+07	1.49575e+07	1.60087e+07	3.37884e+07	5.52048e+07	3.8624e+07	1.74785e+07	5.5074e+07
M113T174	Uracil	113.035	173.9	112.027	0.98004	C4H4N2O2	[M+H]+	Diazines	Pyrimidines and pyrimidine derivatives	C00106	Metabolism of cofactors and vitamins; Metabolism of other amino acids; Global and overview maps; Nucleotide metabolism	66-22-8	HMDB0000300	BioDeepDB	2	pos	1.65429e+07	2.8859e+07	3.30206e+07	1.60362e+07	2.82037e+07	2.79468e+07	3.28585e+07	3.04006e+07	3.14442e+07	3.76822e+07	3.90803e+07	3.6989e+07	2.6839e+07	3.03109e+07	2.79136e+07	2.84316e+07	3.60716e+07	2.07951e+07	3.57391e+07	3.86659e+07	3.03114e+07	1.67621e+07	2.97679e+07	4.17407e+07
M163T707	Anabasine	163.039	706.7	162.116	0.570523	C10H14N2	[M+H]+			C06180	Chemical structure transformation maps; Biosynthesis of other secondary metabolites; Global and overview maps	13078-04-1 / 494-52-0	HMDB0004350	BioDeepDB	2	pos	9.22927e+06	4.39127e+07	4.14131e+07	2.5169e+07	4.40944e+07	3.5759e+07	3.65085e+07	3.4795e+07	3.4387e+07	3.41804e+07	3.27968e+07	1.12913e+07	2.26165e+07	2.24969e+07	4.3941e+07	4.03889e+07	4.28043e+07	3.63116e+07	3.83599e+07	3.92256e+07	3.33832e+07	5.0744e+07	2.50988e+07	6.38609e+07
M188T397	N-Alpha-acetyllysine	188.071	397.2	188.116	0.178896	C8H16N2O3	[M]+	Carboxylic acids and derivatives	Amino acids, peptides, and analogues	C12989		1946-82-3	HMDB0000446	BioDeepDB	2	pos	1.09393e+09	6.65866e+08	1.14269e+09	7.89065e+08	9.63652e+08	9.43273e+08	3.97639e+08	7.22282e+08	4.60111e+08	8.72965e+08	8.83678e+08	5.83611e+08	4.64331e+08	3.34247e+08	7.18827e+08	8.31947e+08	8.79384e+08	5.84379e+08	7.16763e+08	4.55763e+08	9.67645e+08	8.05357e+08	1.93405e+08	2.96726e+08
M170T94	Pyridoxine	170.032	94.4	169.074	10.5068	C8H11NO3	[M+H]+	Pyridines and derivatives	Pyridoxines	C00314	Metabolism of cofactors and vitamins; Global and overview maps	65-23-6	HMDB0000239	BioDeepDB	2	pos	1.6211e+07	4.08231e+07	1.09128e+07	4.3833e+07	1.35639e+07	2.60795e+07	1.46377e+07	1.06615e+07	1.20261e+07	1.76081e+07	1.04697e+07	1.11497e+07	2.12894e+07	4.54603e+07	3.20924e+07	3.22523e+07	1.90422e+07	2.78313e+07	1.70286e+07	1.26744e+07	1.73449e+07	1.79402e+07	3.27883e+07	4.38361e+07
M155T517	2,3-Butanediol	155.107	516.5	154.012	0.0303785	C4H10O2S2	[M+H]+	Organooxygen compounds	Alcohols and polyols	C00265		513-85-9 / 3483-12-3	HMDB0003156	BioDeepDB	2	pos	2.6258e+06	1.14705e+07	1.95287e+06	4.57437e+06	2.13924e+06	5.54803e+06	7.94161e+06	2.14046e+06	4.60375e+06	3.19512e+06	4.50414e+06	9.80706e+06	5.98284e+06	6.06807e+06	4.01662e+06	1.24391e+07	3.48418e+06	6.14495e+06	1.19109e+07	7.41199e+06	8.0383e+06	9.48614e+06	3.31961e+06	2.03374e+06
M132T189_1	L-Leucine	132.102	188.6	131.095	0.756991	C6H13NO2	[M+H]+	Carboxylic acids and derivatives	Amino acids, peptides, and analogues	C00123	Membrane transport; Signal transduction; Digestive system; Biosynthesis of other secondary metabolites; Translation; Amino acid metabolism; Chemical structure transformation maps; Global and overview maps	61-90-5	HMDB0000687	BioDeepDB	2	pos	6.41705e+10	4.61153e+09	3.5203e+10	4.52248e+09	7.19027e+09	3.94013e+09	1.71128e+10	7.90409e+10	1.01266e+10	1.86552e+10	2.32523e+10	1.06259e+09	4.04652e+10	9.65001e+09	1.62709e+10	2.11501e+10	2.44952e+10	7.64173e+09	7.09268e+09	5.21939e+09	3.25461e+09	2.89169e+09	3.15626e+09	1.8984e+09
M343T741_2	Sucrose	343.295	740.6	342.116	0.18093	C12H22O11	[M+H]+	Organooxygen compounds	Carbohydrates and carbohydrate conjugates	C00089	Membrane transport; Sensory system; Digestive system; Carbohydrate metabolism; Global and overview maps	57-50-1	HMDB0000258	BioDeepDB	2	pos	3.99252e+07	2.79484e+07	4.58618e+07	4.15107e+07	3.53142e+07	7.26775e+07	4.81746e+07	1.37617e+07	4.21771e+07	3.97894e+07	5.69546e+07	6.06816e+07	3.16697e+07	4.13947e+07	2.71684e+07	2.41916e+07	4.07985e+07	4.77213e+07	9.35034e+07	3.29606e+07	4.41086e+07	4.77441e+07	3.01517e+07	2.83245e+07
M428T99_2	ADP	428.032	99.2	427.029	10.9244	C10H15N5O10P2	[M+H]+	Purine nucleotides	Purine ribonucleotides	C00008	Transport and catabolism; Signal transduction; Sensory system; Endocrine system; Environmental adaptation; Neurodegenerative disease; Signaling molecules and interaction; Metabolism of terpenoids and polyketides; Nucleotide metabolism; Energy metabolism; Immune system; Global and overview maps	58-64-0 / 20398-34-9	HMDB0001341	BioDeepDB	2	pos	3.47381e+08	3.46182e+08	4.37384e+08	3.75234e+08	3.67555e+08	5.61352e+08	1.13579e+08	6.47017e+08	3.58711e+08	3.00766e+08	3.83908e+08	2.28352e+08	2.26511e+08	3.30488e+08	2.12543e+08	2.43746e+08	1.83955e+08	2.76009e+08	1.17808e+08	2.42594e+08	1.74058e+08	1.5492e+08	2.43e+08	2.55566e+08
M286T771	Fisetin	286.274	770.9	286.048	3.58987	C15H10O6	[M]+			C10041		345909-34-4		BioDeepDB	2	pos	1.18873e+08	2.15051e+08	1.48499e+08	1.69466e+08	3.2131e+07	1.39646e+08	1.60297e+08	4.76984e+07	4.97535e+07	3.95676e+07	1.7277e+08	2.12622e+08	3.82234e+07	1.60546e+08	2.10802e+08	1.65977e+08	2.55518e+08	7.18186e+07	8.03172e+07	7.79928e+07	1.63185e+08	2.31988e+08	1.61561e+08	6.97881e+07
M341T99	Fructose 1,6-bisphosphate	341.002	99.4	339.996	3.44866	C6H14O12P2	[M+H]+	Organooxygen compounds	Carbohydrates and carbohydrate conjugates	C00354	Cancer: overview; Signal transduction; Endocrine system; Amino acid metabolism; Energy metabolism; Global and overview maps	488-69-7	HMDB0001058	BioDeepDB	2	pos	3.19455e+07	3.20857e+07	7.6426e+07	5.068e+06	7.87207e+07	4.8243e+07	8.62012e+07	5.53916e+07	2.31652e+07	1.6915e+06	2.34524e+07	1.97176e+07	1.17221e+07	2.44383e+06	2.04657e+07	8.63181e+07	2.15644e+06	7.38836e+07	1.097e+07	1.54257e+07	3.59595e+06	1.91774e+07	5.57328e+06	6.50713e+06
M334T743	Nicotinamide ribotide	334.295	743.5	334.057	1.17233	C11H15N2O8P	[M]+	Pyridine nucleotides	Nicotinamide nucleotides	C00455	Metabolism of cofactors and vitamins; Global and overview maps	1094-61-7	HMDB0000229	BioDeepDB	2	pos	2.51725e+06	1.95317e+06	2.29541e+06	1.65585e+06	701069	819758	1.82742e+06	1.34583e+06	2.0423e+06	2.17311e+06	2.6407e+06	3.21325e+06	2.08714e+06	2.45856e+06	2.72377e+06	3.02952e+06	1.89504e+06	2.29519e+06	3.18169e+06	2.10515e+06	2.30951e+06	2.06314e+06	3.86544e+06	3.59568e+06
M138T100	4-Hydroxybenzoic acid	138.055	100.1	138.032	0.951111	C7H6O3	[M]+	Benzene and substituted derivatives	Benzoic acids and derivatives	C00156	Metabolism of cofactors and vitamins; Skeleton-based classification; Xenobiotics biodegradation and metabolism; Chemical structure transformation maps; Global and overview maps	99-96-7 / 456-23-5	HMDB0000500	BioDeepDB	2	pos	1.0369e+07	1.10764e+07	9.65047e+06	1.1916e+07	7.78926e+06	6.55972e+06	9.24113e+06	9.65588e+06	9.9526e+06	1.39844e+07	8.30622e+06	7.97209e+06	1.12232e+07	8.76007e+06	1.00839e+07	7.46637e+06	6.91279e+06	8.11091e+06	8.16339e+06	7.68887e+06	8.67742e+06	8.4199e+06	9.67811e+06	9.97834e+06
M162T114	L-Carnitine	162.113	114.3	161.105	0.7649	C7H15NO3	[M+H]+	Organonitrogen compounds	Quaternary ammonium salts	C00318	Environmental adaptation; Digestive system	541-15-1	HMDB0000062	BioDeepDB	2	pos	6.09511e+07	3.8375e+07	4.87943e+07	5.62946e+07	3.34925e+07	1.8003e+07	5.82525e+07	4.23536e+07	7.32729e+07	6.6079e+07	7.07869e+07	6.234e+07	5.61244e+07	3.94975e+07	9.94354e+07	5.48898e+07	6.20476e+07	5.46153e+07	4.47594e+07	5.55267e+07	5.83269e+07	5.6796e+07	4.64073e+07	8.45286e+07
M110T811	Hydroquinone	110.02	811.1	110.037	2.29819	C6H6O2	[M]+	Phenols	Benzenediols	C00530	Amino acid metabolism; Xenobiotics biodegradation and metabolism; Global and overview maps	123-31-9	HMDB0002434	BioDeepDB	2	pos	1.12771e+08	1.43936e+08	1.39991e+08	1.05188e+08	2.8884e+08	4.60889e+08	1.16552e+08	5.66407e+07	3.21771e+07	6.61953e+07	6.76041e+07	4.1019e+07	1.13333e+08	1.32666e+08	1.44024e+07	1.37873e+08	7.89371e+07	8.05272e+07	2.30927e+08	7.07407e+07	8.85744e+07	1.08835e+08	1.40677e+08	2.42955e+07
M369T839_2	Cholesterol	369.349	838.5	386.355	3.07027	C27H46O	[M+H-H2O]+	Steroids and steroid derivatives	Cholestane steroids	C00187	Endocrine and metabolic disease; Digestive system; Endocrine system; Lipid metabolism; Xenobiotics biodegradation and metabolism; Metabolism of terpenoids and polyketides; Cancer: specific types; Chemical structure transformation maps; Global and overview maps	57-88-5	HMDB0000067	BioDeepDB	2	pos	1.71079e+07	8.05914e+06	1.93239e+07	1.8813e+07	1.84707e+07	1.8112e+07	9.56824e+06	9.53611e+06	1.54055e+07	8.07705e+06	7.75478e+06	1.6119e+07	1.51676e+07	9.86561e+06	1.15153e+07	1.8467e+07	2.245e+07	9.49903e+06	1.16514e+07	9.38644e+06	1.69323e+07	1.5197e+07	8.28444e+06	9.87594e+06
M112T118	Cytosine	112.05	118.1	111.043	6.03303	C4H5N3O	[M+H]+	Diazines	Pyrimidines and pyrimidine derivatives	C00380	Global and overview maps; Nucleotide metabolism	71-30-7	HMDB0000630	BioDeepDB	2	pos	6.63559e+08	1.02934e+08	3.92143e+08	4.44759e+08	9.50595e+08	3.24892e+08	3.27082e+08	6.73111e+08	7.32035e+08	3.47573e+08	1.39225e+08	9.47532e+08	5.76437e+08	1.93782e+08	4.95539e+08	3.57349e+08	4.63842e+08	2.18423e+08	4.25667e+08	3.45922e+08	3.58028e+08	4.29379e+08	1.37802e+08	1.46847e+08
M349T121	IMP	349.055	121.1	348.047	0.0230539	C10H13N4O8P	[M+H]+	Purine nucleotides	Purine ribonucleotides	C00130	Drug resistance: antineoplastic; Sensory system; Nucleotide metabolism; Chemical structure transformation maps; Global and overview maps	131-99-7	HMDB0000175	BioDeepDB	2	pos	4.56586e+08	4.82573e+08	3.96972e+08	4.69945e+08	4.90338e+08	4.47419e+08	6.3652e+08	4.31642e+08	4.38322e+08	6.62965e+08	6.11055e+08	5.13954e+08	4.50843e+08	4.17077e+08	8.46698e+08	4.02489e+08	3.98443e+08	3.68242e+08	5.6023e+08	3.80686e+08	3.25106e+08	8.22731e+08	4.25176e+08	4.42022e+08
M307T122	Glutathione	307.083	122.1	307.084	0.138105	C10H17N3O6S	[M]+			C00051	Membrane transport; Cell growth and death; Metabolism of other amino acids; Digestive system; Endocrine system; Amino acid metabolism; Global and overview maps	70-18-8		BioDeepDB	2	pos	3.33878e+08	4.04746e+08	3.14466e+08	2.61178e+08	3.35187e+08	9.68794e+07	4.49054e+08	9.50416e+08	4.78356e+08	1.38838e+09	5.56127e+08	5.95797e+08	1.74898e+08	1.38166e+08	2.08089e+08	6.05464e+08	1.76539e+09	6.17004e+08	3.69374e+08	1.28959e+09	1.82225e+09	4.87946e+08	4.15005e+08	3.95971e+08
M131T338	trans-Cinnamate	131.049	338.4	148.052	0.10768	C9H8O2	[M+H-H2O]+			C00423	Metabolism of cofactors and vitamins; Biosynthesis of other secondary metabolites; Amino acid metabolism; Chemical structure transformation maps; Global and overview maps	140-10-3		BioDeepDB	2	pos	2.89567e+07	1.0709e+07	3.17836e+07	6.49933e+07	5.7137e+07	4.25784e+07	4.44766e+07	4.81826e+07	4.26619e+07	3.80182e+07	4.82101e+07	2.0334e+07	3.43616e+07	5.95171e+07	6.45225e+07	6.06694e+07	3.44361e+07	5.48318e+07	6.55793e+07	6.68572e+07	4.58133e+07	5.70811e+07	6.78878e+07	3.40685e+07
M284T279	Guanosine	284.098	279.1	283.092	2.73145	C10H13N5O5	[M+H]+	Purine nucleosides		C00387	Membrane transport; Global and overview maps; Nucleotide metabolism	118-00-3	HMDB0000133	BioDeepDB	2	pos	4.00307e+07	1.74868e+07	1.55775e+07	3.00375e+07	1.75172e+08	5.68664e+07	4.42601e+07	1.49001e+07	2.04405e+08	3.44777e+08	7.45776e+07	1.80364e+07	1.93847e+07	1.05252e+08	6.72897e+07	2.61965e+07	1.57504e+07	3.75008e+07	1.52607e+08	4.97485e+07	1.39481e+07	1.50727e+07	3.17637e+08	2.8293e+08
M127T335	Thymine	127.05	335	126.043	0.975991	C5H6N2O2	[M+H]+	Diazines	Pyrimidines and pyrimidine derivatives	C00178	Global and overview maps; Nucleotide metabolism	65-71-4	HMDB0000262	BioDeepDB	2	pos	2.84773e+06	9.63435e+06	6.46031e+06	6.74439e+06	2.8302e+06	7.30637e+06	5.42797e+06	2.38456e+06	2.55646e+06	2.2096e+06	7.38759e+06	2.66744e+06	3.25061e+06	2.76135e+06	1.03767e+07	8.74533e+06	9.18694e+06	1.00998e+07	1.16643e+07	1.01984e+07	1.23462e+07	9.71194e+06	8.67426e+06	1.02897e+07
M298T385	5'-Methylthioadenosine	298.095	385.2	297.09	5.95783	C11H15N5O3S	[M+H]+	5'-deoxyribonucleosides	5'-deoxy-5'-thionucleosides	C00170	Chemical structure transformation maps; Amino acid metabolism; Global and overview maps; Metabolism of terpenoids and polyketides	2457-80-9	HMDB0001173	BioDeepDB	2	pos	1.83941e+08	4.91936e+07	2.0777e+08	2.86944e+08	1.47361e+08	4.14576e+07	1.21522e+08	1.47067e+08	3.49608e+08	1.89541e+08	2.67455e+08	3.8266e+08	2.66202e+08	3.87109e+08	6.24302e+08	3.99118e+08	6.99613e+08	4.74161e+08	3.13377e+08	4.54392e+08	1.54785e+08	1.66199e+08	4.46561e+08	5.44556e+08
M166T338_2	L-Phenylalanine	166.086	338.4	165.079	0.0108691	C9H11NO2	[M+H]+			C00079	Cancer: overview; Membrane transport; Metabolism of other amino acids; Digestive system; Biosynthesis of other secondary metabolites; Translation; Amino acid metabolism; Chemical structure transformation maps; Global and overview maps	673-06-3		BioDeepDB	2	pos	6.46705e+09	5.81978e+09	2.78163e+09	7.6701e+09	6.27138e+09	1.10227e+09	4.54631e+09	2.65799e+09	1.02055e+10	4.76384e+09	4.87088e+09	4.47178e+09	2.13348e+09	6.89486e+09	5.26617e+09	6.88819e+09	3.6746e+09	6.3111e+09	5.6762e+09	2.7622e+09	3.76329e+09	3.83045e+09	5.48637e+09	6.21576e+09
M184T362	3,4-Dihydroxymandelic acid	184.17	362.4	184.037	0.238379	C8H8O5	[M]+			C05580	Amino acid metabolism; Global and overview maps	14883-87-5	HMDB0001866	BioDeepDB	2	pos	3.22674e+06	561197	3.37666e+06	3.35127e+06	618487	3.60521e+06	2.71734e+06	2.69037e+06	7.56531e+06	8.98905e+06	7.63885e+06	9.63977e+06	8.45549e+06	1.28034e+07	9.16359e+06	6.17626e+06	8.62023e+06	6.71369e+06	4.99638e+06	4.72133e+06	7.08932e+06	6.32867e+06	9.39966e+06	1.99165e+07
M415T802_2	Sodium deoxycholate	415.211	801.5	414.275	2.46027	C24H39O4. Na	[M+H]+			C11171		302-95-4		BioDeepDB	2	pos	2.70539e+08	1.51874e+08	2.4475e+08	2.63467e+08	3.25806e+08	1.29457e+08	2.7184e+08	1.53801e+08	1.48651e+08	3.58414e+08	3.16445e+08	2.34199e+08	1.49019e+08	7.96383e+07	3.1653e+08	1.81891e+08	2.16396e+08	2.61248e+08	2.07465e+08	3.4203e+08	2.66371e+08	2.01369e+08	1.54815e+08	2.00665e+08
M498T649	Taurocholic acid	498.29	649.3	515.292	10.9053	C26H45NO7S	[M+H-H2O]+	Steroids and steroid derivatives	Bile acids, alcohols and derivatives	C05122	Lipid metabolism; Metabolism of other amino acids; Global and overview maps; Digestive system	81-24-3	HMDB0000036	BioDeepDB	2	pos	5.55127e+06	1.78507e+06	3.0504e+06	4.76554e+06	1.78722e+06	2.11674e+06	3.16431e+06	3.5034e+06	3.90075e+06	4.28347e+06	3.3942e+06	2.29035e+06	2.22499e+06	2.6571e+06	5.65674e+06	3.10531e+06	2.15824e+06	3.68927e+06	2.39539e+06	1.51353e+06	3.78791e+06	3.9205e+06	2.73722e+06	2.49497e+06
M347T712	Corticosterone	347.221	711.9	346.214	3.09889	C21H30O4	[M+H]+	Steroids and steroid derivatives	Hydroxysteroids	C02140	Lipid metabolism; Neurodegenerative disease; Global and overview maps; Endocrine system	50-22-6	HMDB0001547	BioDeepDB	2	pos	3.73024e+06	2.98315e+06	2.7827e+06	8.66251e+06	5.61975e+06	8.25944e+06	8.33526e+06	8.45658e+06	5.54381e+06	5.81877e+06	6.96585e+06	9.34134e+06	7.00967e+06	3.81956e+06	1.04821e+07	2.82273e+06	1.05891e+07	9.67714e+06	9.90871e+06	1.04444e+07	2.61133e+06	6.56161e+06	6.12009e+06	7.63659e+06
M178T403	D-Gulono-1,4-lactone	178.134	402.7	178.048	1.42053	C6H10O6	[M]+			C05410		6322-07-2		BioDeepDB	2	pos	1.57933e+07	8.727e+06	1.9383e+07	2.50309e+07	1.33965e+07	1.27714e+07	1.57598e+07	1.20906e+07	2.6532e+07	1.16758e+07	4.1817e+07	3.62538e+07	1.40188e+07	1.13305e+07	1.41596e+07	6.46451e+06	9.13705e+06	1.90112e+07	1.79455e+07	1.4311e+07	1.69004e+07	8.13141e+06	1.7894e+07	1.13189e+07
M430T538_2	alpha-Tocopherol	430.242	538.2	430.381	1.82878	C29H50O2	[M]+	Prenol lipids	Quinone and hydroquinone lipids	C02477	Metabolism of cofactors and vitamins; Cell growth and death; Digestive system; Chemical structure transformation maps; Global and overview maps	59-02-9	HMDB0001893	BioDeepDB	2	pos	4.11394e+07	2.15022e+07	2.96662e+07	2.5671e+07	4.85769e+07	5.37977e+07	2.28592e+07	3.35496e+07	4.64086e+07	4.47615e+07	2.98398e+07	2.90908e+07	2.83365e+07	2.50156e+07	9.13245e+07	5.03561e+07	4.09444e+07	3.83891e+07	3.07937e+07	6.80395e+07	4.5259e+07	3.73518e+07	1.82533e+07	3.11546e+07
M243T565	Lumichrome	243.087	565.1	242.08	2.7809	C12H10N4O2	[M+H]+			C01727	Metabolism of cofactors and vitamins	1086-80-2		BioDeepDB	2	pos	1.56789e+08	5.56701e+07	1.2819e+08	1.84287e+08	1.06244e+08	5.9267e+07	1.03041e+08	7.39424e+07	1.50936e+08	1.78044e+08	1.03416e+08	1.32267e+08	1.33948e+08	8.92392e+07	1.75073e+08	1.41548e+08	1.32397e+08	1.66756e+08	1.44714e+08	1.91901e+08	1.24647e+08	1.83611e+08	1.17122e+08	1.07939e+08
M306T802	8,11,14-Eicosatrienoic acid	306.242	802	306.256	27.5627	C20H34O2	[M]+	Fatty Acyls	Fatty acids and conjugates	C03242	Lipid metabolism; Global and overview maps	1783-84-2	HMDB0002925	BioDeepDB	2	pos	8.08245e+06	1.0185e+07	5.41386e+06	8.1524e+06	6.92337e+06	6.41516e+06	5.05303e+06	4.45622e+06	8.37539e+06	9.35861e+06	8.41107e+06	3.46446e+06	4.55812e+06	6.75646e+06	3.01699e+06	7.01559e+06	3.8295e+06	1.11772e+07	4.58993e+06	5.80716e+06	8.1556e+06	8.03437e+06	4.0044e+06	6.62459e+06
M376T824	Lithocholic acid	376.314	824.4	376.298	3.81033	C24H40O3	[M]+	Lipids and lipid-like molecules	Steroids and steroid derivatives	C03990	Lipid metabolism; Digestive system	434-13-9	HMDB0000761	BioDeepDB	2	pos	5.86133e+06	7.68097e+06	9.64507e+06	6.24907e+06	6.20252e+06	4.79264e+06	1.05026e+07	8.53421e+06	1.0633e+07	9.39579e+06	6.79595e+06	1.10857e+07	1.01122e+07	1.02367e+07	6.9438e+06	5.15649e+06	7.05476e+06	9.85691e+06	5.71823e+06	9.37912e+06	7.56457e+06	9.23116e+06	8.91238e+06	1.25325e+07
M224T804	Methyl jasmonate	223.989	803.5	224.141	4.06368	C13H20O3	[M]+	Fatty Acyls	Lineolic acids and derivatives	C11512	Lipid metabolism; Global and overview maps	1211-29-6 / 39924-52-2	HMDB0036583	BioDeepDB	2	pos	4.04124e+08	3.06768e+08	2.80165e+08	3.537e+08	2.21267e+08	3.01977e+08	4.27149e+08	2.66057e+08	3.2467e+08	3.12907e+08	3.96565e+08	2.4097e+08	3.03967e+08	1.44572e+08	2.79332e+08	4.05614e+08	1.5449e+08	2.52842e+08	3.88838e+08	2.98034e+08	2.61032e+08	2.97762e+08	1.77735e+08	4.24441e+08
M273T744	Estradiol	273.253	744	272.178	2.07604	C18H24O2	[M+H]+	Steroids and steroid derivatives	Estrane steroids	C00951	Cancer: overview; Drug resistance: antineoplastic; Excretory system; Endocrine system; Lipid metabolism; Environmental adaptation; Cancer: specific types; Target-based classification: Nuclear receptors; Global and overview maps	50-28-2	HMDB0000151	BioDeepDB	2	pos	9.64016e+07	1.78862e+08	4.99329e+07	5.33928e+07	5.773e+07	8.21822e+07	1.81588e+08	6.39807e+07	1.07376e+08	8.75698e+07	2.6412e+08	7.75689e+07	9.99381e+07	1.05412e+08	1.00886e+08	6.07298e+07	1.71694e+08	1.17112e+08	1.63268e+08	1.25604e+08	1.20205e+08	7.16723e+07	9.12697e+07	6.83787e+07
M282T788	(6Z)-Octadecenoic acid	282.279	788.2	282.256	1.51304	C18H34O2	[M]+			C08363		593-39-5		BioDeepDB	2	pos	5.02567e+08	3.6335e+08	8.51824e+08	6.65985e+08	6.92966e+08	9.72036e+08	5.85043e+08	4.60559e+08	6.12374e+08	3.452e+08	2.51128e+08	1.24722e+09	2.61223e+08	2.88362e+08	4.86485e+08	1.07308e+09	1.57875e+09	6.29211e+08	3.10257e+08	8.38572e+08	5.03332e+08	1.0273e+09	4.21585e+08	4.32698e+08
M398T795_1	S-Adenosylmethionine	398.239	795.1	398.137	4.32188	C15H22N6O5S	[M]+			C00019	Biosynthesis of other secondary metabolites; Metabolism of terpenoids and polyketides; Amino acid metabolism; Folding, sorting and degradation; Chemical structure transformation maps; Global and overview maps	17176-17-9		BioDeepDB	2	pos	4.19374e+07	2.15082e+07	3.61055e+07	2.2575e+07	4.04476e+07	3.69786e+07	4.45856e+07	2.91444e+07	3.44784e+07	2.49294e+07	2.31167e+07	4.63068e+07	3.47714e+07	5.13616e+07	4.49663e+07	4.29034e+07	5.86507e+07	2.93192e+07	6.80503e+07	5.01566e+07	2.73025e+07	3.0203e+07	5.21569e+07	4.53236e+07
M155T798	Gentisic acid	154.99	798	154.027	1.0305	C7H6O4	[M+H]+	Benzene and substituted derivatives	Benzoic acids and derivatives	C00628	Amino acid metabolism; Xenobiotics biodegradation and metabolism; Global and overview maps	490-79-9	HMDB0000152	BioDeepDB	2	pos	2.46411e+08	1.49725e+08	4.40472e+08	1.66259e+08	4.28671e+08	5.96237e+08	2.00633e+08	2.65259e+08	3.76316e+08	3.46624e+08	3.97044e+08	2.34691e+08	2.72406e+08	2.5079e+08	1.28822e+08	1.65291e+08	3.13192e+08	5.04255e+08	3.10899e+08	3.66179e+08	1.56349e+08	2.00856e+08	2.17185e+08	2.81654e+08
M432T802_2	Isovitexin	432.236	801.6	432.106	7.42816	C21H20O10	[M]+			C01714	Biosynthesis of other secondary metabolites	38953-85-4 / 29702-25-8		BioDeepDB	2	pos	9.72127e+07	1.8035e+08	3.38095e+08	1.83584e+08	1.26142e+08	4.47072e+07	3.8277e+07	5.92256e+07	1.22122e+08	2.57914e+08	9.81614e+07	9.90596e+07	1.25221e+08	1.11553e+08	2.24681e+08	1.93382e+08	1.07583e+08	1.14652e+08	1.95586e+08	1.21879e+08	1.98594e+08	1.01439e+08	2.12094e+08	1.06279e+08
M145T815	3-Hydroxymethylglutaric acid	144.982	815.3	162.053	2.54713	C6H10O5	[M+H-H2O]+	Fatty Acyls	Fatty acids and conjugates	C03761		503-49-1	HMDB0000355	BioDeepDB	2	pos	1.62483e+07	5.70895e+07	4.06357e+07	7.02644e+07	3.42609e+07	2.96445e+07	5.288e+07	4.88684e+07	2.24502e+07	1.93197e+07	5.24529e+07	2.62661e+07	1.80534e+07	1.46152e+07	1.48459e+07	1.33316e+07	3.85809e+07	2.67046e+07	2.27114e+07	2.89673e+07	2.6004e+07	2.76745e+07	7.99644e+06	1.37244e+07
M112T73	Histamine	112.087	73.1	111.08	0	C5H9N3	[M+H]+	Organonitrogen compounds	Amines	C00388	Nervous system; Sensory system; Digestive system; Target-based classification: G protein-coupled receptors; Signaling molecules and interaction; Amino acid metabolism; Immune disease; Chemical structure transformation maps; Immune system; Global and overview maps	51-45-6	HMDB0000870	BioDeepDB	2	pos	4.82679e+07	3.48855e+06	1.48366e+07	1.10699e+07	1.39822e+07	2.93721e+07	1.85978e+07	3.61199e+07	2.61612e+07	1.18057e+07	1.30966e+07	5.4263e+07	1.40633e+07	3.04331e+07	3.84618e+07	2.76345e+07	9.04417e+07	1.34725e+07	1.1128e+07	5.05342e+07	1.48535e+07	2.01298e+07	2.19081e+07	1.30961e+07
M126T75	1-Methylhistamine	126.102	74.7	125.095	1.39569	C6H11N3	[M+H]+	Organonitrogen compounds	Amines	C05127	Amino acid metabolism; Global and overview maps	501-75-7	HMDB0000898	BioDeepDB	2	pos	1.91966e+08	1.17167e+08	1.87278e+08	1.08744e+08	2.07864e+08	1.5022e+08	1.35639e+08	1.42136e+08	1.97161e+08	1.98877e+08	1.38097e+08	9.26513e+07	1.75447e+08	1.44385e+08	1.91848e+08	1.41298e+08	1.94665e+08	2.02719e+08	1.88205e+08	1.01057e+08	1.32504e+08	1.05101e+08	2.2615e+08	8.93897e+07
M265T86	Thiamine	265.112	86.4	265.112	0.754398	C12H17N4OS	[M+H]+	Diazines	Pyrimidines and pyrimidine derivatives	C00378	Metabolism of cofactors and vitamins; Membrane transport; Digestive system; Folding, sorting and degradation; Global and overview maps	59-43-8	HMDB0000235	BioDeepDB	2	pos	8.95108e+06	5.84117e+06	7.91968e+06	9.15546e+06	5.29165e+06	1.22903e+07	5.2786e+06	5.41259e+06	2.65056e+07	3.46742e+07	2.3607e+07	2.95554e+07	2.70823e+07	2.44724e+07	3.30211e+07	7.32548e+06	2.60137e+07	1.82968e+07	1.43442e+07	1.64445e+07	3.05137e+07	2.65294e+07	4.08427e+07	3.76853e+07
M310T92	N-Acetyl-a-neuraminic acid	310.113	92.2	309.106	2.17985	C11H19NO9	[M+H]+	Organooxygen compounds	Carbohydrates and carbohydrate conjugates	C19909		21646-00-4	HMDB0000773	BioDeepDB	2	pos	5.63452e+07	8.66612e+07	4.88296e+07	6.55021e+07	1.06542e+08	1.14618e+08	4.72731e+07	9.7933e+07	7.98395e+07	8.72766e+07	1.05213e+08	8.91199e+07	9.70293e+07	9.39095e+07	9.18842e+07	9.98971e+07	6.36362e+07	6.4056e+07	5.89625e+07	7.2411e+07	5.75636e+07	5.63099e+07	5.10779e+07	6.10343e+07
M245T679	Etomidate	245.129	679.1	244.121	2.85564	C14H16N2O2	[M+H]+	Azoles	Imidazoles	C07522		33125-97-2	HMDB0014437	BioDeepDB	2	pos	3.19015e+06	6.935e+06	2.19287e+06	1.66465e+06	4.24453e+06	1.22451e+06	4.02668e+06	2.5759e+06	1.68586e+06	180819	2.97913e+06	2.38911e+06	1.42641e+06	4.06475e+06	3.23584e+06	883820	1.18513e+06	2.87904e+06	1.56429e+06	3.16333e+06	1.05139e+06	1.025e+06	2.3832e+06	545830
M146T115	Acetylcholine	146.118	115.2	146.118	0	C7H16NO2	[M+H]+	Organonitrogen compounds	Quaternary ammonium salts	C01996	Nervous system; Signal transduction; Sensory system; Endocrine system; Digestive system; Lipid metabolism; Neurodegenerative disease; Signaling molecules and interaction; Substance dependence; Cell motility	51-84-3	HMDB0000895	BioDeepDB	2	pos	2.06067e+07	9.91073e+07	1.39014e+07	1.57097e+07	1.25738e+07	1.09062e+07	1.50341e+07	1.41766e+07	9.49822e+06	1.53577e+07	1.85262e+07	8.56407e+06	8.80466e+06	8.26134e+06	8.85881e+06	1.06566e+07	1.68016e+07	1.02466e+07	1.3018e+07	1.37749e+07	1.10753e+07	1.02311e+07	2.13116e+07	1.14047e+07
M253T343	Deoxyinosine	253.093	342.9	252.086	0.395112	C10H12N4O4	[M+H]+	Purine nucleosides	Purine 2'-deoxyribonucleosides	C05512	Membrane transport; Global and overview maps; Nucleotide metabolism	890-38-0	HMDB0000071	BioDeepDB	2	pos	4.7576e+06	4.86499e+06	4.94647e+06	5.06805e+06	5.05679e+06	4.69843e+06	5.09441e+06	5.00567e+06	4.37906e+06	4.89835e+06	5.55674e+06	4.51033e+06	4.51111e+06	4.7459e+06	4.84102e+06	5.05503e+06	4.43661e+06	5.46081e+06	5.53712e+06	4.44233e+06	5.22671e+06	5.61151e+06	4.50243e+06	5.37306e+06
M180T353	beta-D-Glucosamine	180.088	353.3	179.079	7.35196	C6H13NO5	[M+H]+	Carbohydrates and carbohydrate conjugates	Aminosaccharides	C08349		14257-69-3/3416-24-8	HMDB0030091	BioDeepDB	2	pos	1.24371e+06	3.5657e+06	4.1621e+06	4.16668e+06	1.37125e+06	1.33478e+06	2.40472e+06	3.39112e+06	4.22702e+06	2.24433e+06	2.57835e+06	4.02623e+06	3.5522e+06	2.40199e+06	5.4624e+06	2.36557e+06	5.28029e+06	2.86826e+06	3.79599e+06	5.05126e+06	3.17336e+06	4.37339e+06	1.30852e+06	2.1397e+06
M148T116	O-Acetylserine	148.06	116.3	147.053	0.6754	C5H9NO4	[M+H]+	Carboxylic acids and derivatives	Amino acids, peptides, and analogues	C00979	Biosynthesis of other secondary metabolites; Metabolism of terpenoids and polyketides; Amino acid metabolism; Folding, sorting and degradation; Energy metabolism; Global and overview maps	5147-00-2	HMDB0003011	BioDeepDB	2	pos	3.44894e+07	2.12013e+07	3.10781e+07	6.49047e+06	5.0166e+07	2.79869e+07	4.31189e+07	2.54505e+07	1.20561e+07	1.14079e+07	1.18259e+07	1.13e+07	2.00703e+07	1.08315e+07	1.94946e+07	5.49076e+07	9.69465e+06	5.44584e+07	1.12132e+07	9.80684e+06	1.11886e+07	1.17898e+07	1.55051e+07	1.49746e+07
M348T119	AMP	348.069	118.8	347.063	4.52784	C10H14N5O7P	[M+H]+	Purine nucleotides	Purine ribonucleotides	C00020	Endocrine and metabolic disease; Drug resistance: antineoplastic; Signal transduction; Sensory system; Endocrine system; Neurodegenerative disease; Metabolism of terpenoids and polyketides; Nucleotide metabolism; Substance dependence; Chemical structure transformation maps; Global and overview maps	61-19-8	HMDB0000045	BioDeepDB	2	pos	9.41182e+08	1.20764e+07	1.12198e+07	1.47643e+09	1.28519e+09	9.88778e+08	1.26375e+07	9.43457e+06	1.15055e+07	1.25356e+09	1.02025e+07	1.2689e+08	1.184e+09	1.11599e+07	1.21955e+07	1.47636e+09	1.15265e+09	1.08302e+07	1.10866e+07	1.18177e+07	1.14782e+07	1.11129e+07	1.22824e+07	1.31571e+07
M268T125	Adenosine	268.104	125	267.097	0.74598	C10H13N5O4	[M+H]+	Purine nucleosides		C00212	Circulatory system; Membrane transport; Signal transduction; Endocrine system; Neurodegenerative disease; Signaling molecules and interaction; Nucleotide metabolism; Substance dependence; Global and overview maps	58-61-7	HMDB0000050	BioDeepDB	2	pos	1.17221e+08	1.29129e+08	1.22326e+08	1.57688e+08	1.3783e+08	4.52233e+07	1.3311e+08	1.40632e+08	1.62809e+08	1.91732e+08	1.30583e+08	1.8259e+08	9.78963e+07	1.09938e+08	1.56744e+08	8.88378e+07	1.54166e+08	1.18107e+08	1.05654e+08	1.8321e+08	1.39027e+08	1.45888e+08	1.20158e+08	1.39684e+08
M127T135	Maltol	127.039	135.5	126.032	2.36147	C6H6O3	[M+H]+	Pyrans	Pyranones and derivatives	C11918	Global and overview maps; Metabolism of terpenoids and polyketides	118-71-8	HMDB0030776	BioDeepDB	2	pos	3.56998e+07	2.91064e+07	3.23632e+07	3.45166e+07	4.0198e+07	4.72526e+07	3.96303e+07	3.78734e+07	4.51351e+07	4.37972e+07	4.44159e+07	3.42008e+07	3.79318e+07	3.59883e+07	3.27183e+07	4.14412e+07	4.0857e+07	4.57757e+07	4.22496e+07	3.83685e+07	4.1793e+07	3.75521e+07	4.28475e+07	5.57076e+07
M152T140	Guanine	152.057	139.7	151.049	0	C5H5N5O	[M+H]+	Imidazopyrimidines	Purines and purine derivatives	C00242	Global and overview maps; Nucleotide metabolism	73-40-5	HMDB0000132	BioDeepDB	2	pos	6.50261e+07	9.19298e+07	7.76416e+07	9.65631e+07	5.02251e+07	2.9216e+07	6.97712e+07	7.23194e+07	7.51959e+07	1.28393e+08	4.45178e+07	4.76492e+07	7.2049e+07	6.90849e+07	8.27525e+07	4.31899e+07	4.1345e+07	5.3467e+07	5.20011e+07	5.60749e+07	5.06348e+07	5.65834e+07	7.74848e+07	6.70899e+07
M123T140	Niacinamide	123.055	140.2	122.048	0	C6H6N2O	[M+H]+	Pyridines and derivatives	Pyridinecarboxylic acids and derivatives	C00153	Metabolism of cofactors and vitamins; Global and overview maps; Aging; Digestive system	98-92-0	HMDB0001406	BioDeepDB	2	pos	2.87926e+08	3.79976e+08	3.04705e+08	2.6817e+08	1.04928e+09	5.26395e+08	3.31225e+08	7.15925e+08	6.70907e+08	1.24989e+09	9.7701e+08	1.08887e+09	7.43054e+08	8.88636e+08	7.26703e+08	9.1028e+08	6.76307e+08	1.08189e+09	8.12798e+08	1.07693e+09	1.01628e+09	7.04492e+07	8.13485e+08	5.19753e+08
M194T142	Orciprenaline	194.118	141.6	211.121	21.2964	C11H17NO3	[M+H-H2O]+	Phenols	Benzenediols	C07144		586-06-1	HMDB0014954	BioDeepDB	2	pos	3.27847e+07	3.47325e+07	4.73745e+07	3.10301e+07	4.45548e+07	3.64783e+07	3.43828e+07	4.14991e+07	2.73904e+07	2.4522e+07	2.80656e+07	2.62125e+07	4.70822e+07	2.66429e+07	5.87005e+07	2.72865e+07	3.53835e+07	4.57586e+07	3.86874e+07	3.35147e+07	3.63991e+07	3.89696e+07	3.57807e+07	4.40486e+07
M348T146	3'-AMP	348.069	145.7	347.063	4.81514	C10H14N5O7P	[M+H]+	Ribonucleoside 3'-phosphates		C01367	Global and overview maps; Nucleotide metabolism	84-21-9	HMDB0003540	BioDeepDB	2	pos	6.46604e+06	3.50018e+06	5.07357e+06	5.81516e+06	5.05184e+06	6.31218e+06	6.42963e+06	6.74642e+06	7.84806e+06	7.28009e+06	9.20413e+06	5.7895e+06	7.08038e+06	7.76385e+06	6.53018e+06	4.72702e+06	6.30971e+06	6.90232e+06	5.51039e+06	6.41014e+06	4.603e+06	6.39957e+06	8.16425e+06	7.79102e+06
M153T318	3-Hydroxyanthranilate	153.041	318.1	153.043	13.0233	C7H7NO3	[M]+	Benzene and substituted derivatives	Benzoic acids and derivatives	C00632	Amino acid metabolism; Xenobiotics biodegradation and metabolism; Global and overview maps	548-93-6	HMDB0001476	mzCloud	2	pos	4.93982e+06	7.53102e+06	9.07308e+06	1.04305e+07	7.48403e+06	9.46958e+06	9.16465e+06	9.09695e+06	1.07467e+07	1.63124e+07	1.61533e+07	1.50035e+07	1.23693e+07	2.72989e+07	3.45564e+07	3.31819e+07	5.40575e+07	2.95014e+07	3.35664e+07	3.55005e+07	3.36422e+07	4.23666e+07	3.62974e+07	3.21581e+07
M118T399	Indole	118.065	399.3	117.058	0.84699	C8H7N	[M+H]+	Indoles and derivatives	Indoles	C00463	Amino acid metabolism; Biosynthesis of other secondary metabolites; Global and overview maps; Digestive system	120-72-9	HMDB0000738	BioDeepDB	2	pos	9.89603e+06	1.9311e+07	1.51961e+07	1.20514e+07	2.21078e+07	9.49513e+06	1.52821e+07	1.70663e+07	1.57661e+07	2.59248e+07	2.78625e+07	2.04606e+07	4.67451e+06	7.36744e+06	7.9042e+06	5.38216e+06	5.43333e+06	7.57229e+06	3.62651e+06	2.81792e+06	5.32008e+06	2.69222e+06	9.72397e+06	1.09346e+07
M213T705	Harmine	213.102	705.2	212.095	2.06007	C13H12N2O	[M+H]+	Harmala alkaloids		C06538	Chemical structure transformation maps	442-51-3	HMDB0030311	MoNA	2	pos	1.81979e+06	1.53245e+06	1.45954e+06	1.56215e+06	739322	572440	1.631e+06	1.48718e+06	1.06056e+06	760077	1.67461e+06	1.30812e+06	1.49712e+06	942363	733182	1.80105e+06	1.57829e+06	1.5605e+06	1.29713e+06	1.61934e+06	1.37952e+06	1.43414e+06	1.00068e+06	1.08499e+06
M129T76	1,1-Dimethylbiguanide	129.102	76.3	129.101	6.30352e-05	C4H11N5	[M]+	Organonitrogen compounds	Guanidines	C07151	Signal transduction; Aging; Digestive system	1115-70-4 / 657-24-9	HMDB0001921	BioDeepDB	2	pos	5.9316e+06	7.21027e+06	7.40007e+06	8.33103e+06	6.27985e+06	6.85402e+06	8.62644e+06	9.92856e+06	7.54322e+06	7.32887e+06	7.53332e+06	7.46959e+06	8.68829e+06	8.82643e+06	7.30505e+06	7.56801e+06	7.70792e+06	7.5441e+06	7.18697e+06	6.76583e+06	7.29281e+06	6.62322e+06	6.72901e+06	5.39851e+06
M335T767	Hydroxychloroquine	335.17	766.9	335.176	19.0948	C18H26ClN3O	[M]+	Quinolines and derivatives	Aminoquinolines and derivatives	C07043		118-42-3	HMDB0015549	BioDeepDB	2	pos	4.83996e+07	7.10011e+07	6.08288e+07	2.5032e+07	1.85614e+08	1.55388e+08	4.11869e+07	6.82078e+07	1.87388e+07	3.41466e+07	1.9931e+07	1.18068e+07	3.97928e+07	7.15296e+07	3.53414e+06	4.40128e+07	3.56021e+07	4.82111e+07	1.33506e+08	3.43938e+07	2.67368e+07	2.36995e+07	8.48964e+07	1.10286e+07
M194T313	3,4-Methylenedioxyamphetamine	194.117	313	193.11	0.162997	C11H15NO2	[M+H]+	Benzodioxoles		C07577		4764-17-4 / 42542-10-9	HMDB0041931	BioDeepDB	2	pos	2.1449e+08	1.48206e+08	1.42548e+08	1.82481e+08	1.88894e+08	1.26271e+08	3.06905e+08	1.927e+08	6.49319e+07	9.11692e+07	4.08703e+07	5.55438e+07	2.90394e+07	5.75928e+07	5.70015e+07	6.73802e+07	3.88386e+07	4.78941e+07	5.30034e+07	2.6409e+07	7.69126e+07	6.24792e+07	9.27612e+07	8.67178e+07
M135T742	Chavicol	135.08	741.6	134.073	0	C9H10O	[M+H]+	Phenols	1-hydroxy-2-unsubstituted benzenoids	C16930	Biosynthesis of other secondary metabolites	501-92-8	HMDB0034107	BioDeepDB	2	pos	4.68705e+06	2.67613e+06	1.12248e+07	4.25333e+06	1.51144e+07	1.62838e+07	3.87862e+06	1.00324e+07	1.3174e+07	3.56797e+06	7.71037e+06	7.25949e+06	6.34002e+06	3.10485e+06	4.27299e+06	5.37188e+06	4.53996e+06	2.01454e+07	9.18875e+06	9.78223e+06	6.26784e+06	4.53561e+06	2.54195e+06	6.08908e+06
M277T633	Cinchonidine	277.165	633	294.173	1.32051	C19H22N2O	[M+H-H2O]+	Cinchona alkaloids		C11379	Chemical structure transformation maps	485-71-2	HMDB0030282	BioDeepDB	2	pos	6.82305e+06	1.19174e+07	5.42065e+06	9.10777e+06	1.08804e+07	6.39021e+06	1.47801e+07	6.2945e+06	1.10316e+07	1.36798e+07	4.88324e+07	9.64736e+06	4.95178e+06	8.49513e+06	7.02362e+06	6.09312e+06	1.07889e+07	6.65363e+06	6.905e+06	7.32081e+06	8.84498e+06	5.14557e+06	9.36534e+06	1.52608e+07
M314T703	Progesterone	314.232	703	314.225	22.2766	C21H30O2	[M]+	Steroids and steroid derivatives	Pregnane steroids	C00410	Endocrine and metabolic disease; Cancer: overview; Cell growth and death; Endocrine system; Lipid metabolism; Cancer: specific types; Target-based classification: Nuclear receptors; Global and overview maps	57-83-0	HMDB0001830	BioDeepDB	2	pos	6.8566e+06	1.27252e+07	1.18057e+07	5.17581e+06	5.63971e+06	5.18186e+06	4.66477e+06	1.54612e+07	9.68523e+06	2.03068e+07	2.24352e+07	2.32091e+07	7.67627e+06	1.41967e+07	1.63044e+07	1.19455e+07	1.7245e+07	1.36569e+07	1.71601e+07	1.99943e+07	1.83015e+07	1.02434e+07	1.70961e+07	1.70333e+07
M319T698	5-KETE	319.226	698.4	318.219	3.99717	C20H30O3	[M+H]+	Fatty Acyls	Fatty acids and conjugates	C14732	Lipid metabolism	126432-17-5/106154-18-1	HMDB0010217	BioDeepDB	2	pos	2.21457e+06	9.29518e+06	6.99937e+06	1.6048e+06	6.14081e+06	5.3951e+06	4.15269e+06	1.08542e+07	1.86179e+07	7.08562e+06	4.50843e+06	3.72791e+06	1.02698e+07	5.0326e+06	8.38306e+06	6.60826e+06	3.98096e+06	4.18541e+06	6.12018e+06	8.00771e+06	5.35684e+06	5.6546e+06	6.47144e+06	1.6943e+07
M300T728	all-trans-Retinoic acid	300.2	727.9	300.209	29.98	C20H28O2	[M]+	Prenol lipids	Retinoids	C00777	Cancer: overview; Metabolism of cofactors and vitamins; Cancer: specific types; Immune system; Global and overview maps	302-79-4	HMDB0001852	BioDeepDB	2	pos	2.70309e+07	2.25456e+07	3.34282e+07	2.42557e+07	1.80195e+07	1.04971e+07	2.18966e+07	1.66791e+07	4.80234e+07	3.80875e+07	2.73977e+07	2.3994e+07	4.186e+07	3.88997e+07	3.9008e+07	5.15068e+07	3.9136e+07	5.0429e+07	2.62587e+07	3.53991e+07	3.30441e+07	2.74128e+07	2.11111e+07	3.62831e+07
M295T760	13-L-Hydroperoxylinoleic acid	295.216	759.8	312.23	21.5638	C18H32O4	[M+H-H2O]+	Fatty Acyls	Lineolic acids and derivatives	C04717	Lipid metabolism; Global and overview maps	33964-75-9	HMDB0003871	BioDeepDB	2	pos	2.10914e+07	3.72586e+07	1.95183e+07	1.96966e+07	1.54585e+07	2.01344e+07	2.01526e+07	2.01699e+07	4.7904e+07	2.6547e+07	6.9563e+07	3.20063e+07	2.19611e+07	4.53244e+07	2.7571e+07	1.00029e+07	2.29554e+07	4.50219e+07	3.0565e+07	3.4093e+07	1.807e+07	3.77874e+07	2.59453e+07	1.91396e+07
M316T717	Decanoyl-L-carnitine	316.247	717.4	315.241	0.977111	C17H33NO4	[M+H]+			C03299		3992-45-8	HMDB00651	BioDeepDB	2	pos	6.65114e+06	9.61546e+06	9.22814e+06	1.22387e+07	4.76817e+06	9.38378e+06	6.18769e+06	1.04829e+07	1.04068e+07	9.89873e+06	7.74644e+06	5.59413e+06	7.20674e+06	4.54714e+06	6.82753e+06	1.13307e+07	7.25125e+06	6.62897e+06	1.80388e+07	9.11304e+06	1.1197e+07	5.17327e+06	1.65967e+07	1.10785e+07
M199T770	12-Hydroxydodecanoic acid	199.169	770.3	216.173	22.2624	C12H24O3	[M+H-H2O]+	Hydroxy acids and derivatives	Medium-chain hydroxy acids and derivatives	C08317		505-95-3	HMDB0002059	BioDeepDB	2	pos	2.14391e+07	7.54895e+06	4.45108e+06	1.68851e+07	7.48725e+06	1.62182e+07	4.9661e+06	2.22742e+07	7.30246e+06	1.41145e+07	1.40871e+07	1.868e+07	1.8928e+07	1.20156e+07	1.04564e+07	1.39279e+07	1.60163e+07	5.85737e+06	1.37058e+07	6.67109e+06	2.18845e+07	1.35162e+07	9.10838e+06	1.24822e+07
M300T793_1	Sphingosine	300.289	792.5	299.282	2.25116	C18H37NO2	[M+H]+	Organonitrogen compounds	Amines	C00319	Lipid metabolism; Cell growth and death; Signal transduction; Global and overview maps	123-78-4	HMDB0000252	BioDeepDB	2	pos	3.72681e+07	9.29609e+06	2.03838e+07	4.66824e+06	1.63828e+07	5.08983e+07	9.17308e+07	8.82187e+06	9.87458e+06	3.28822e+07	4.09711e+07	9.9327e+06	1.57804e+07	2.63121e+06	1.87106e+07	2.60485e+07	9.45992e+06	1.25312e+07	9.14646e+06	3.19361e+06	3.62119e+07	1.81715e+07	1.88925e+07	6.28252e+06
M472T811_2	Maslinic acid	472.349	810.7	472.355	12.279	C30H48O4	[M]+	Prenol lipids	Triterpenoids	C16939		4373-41-5	HMDB0002392	BioDeepDB	2	pos	3.41703e+07	4.10884e+06	3.92606e+07	1.04564e+07	2.71824e+07	2.71408e+07	3.13892e+07	2.98955e+07	1.50889e+07	3.63206e+07	1.46521e+07	2.60217e+07	3.29381e+07	2.84368e+07	1.15233e+07	3.52513e+07	3.63048e+07	4.70837e+07	4.22465e+07	4.60479e+07	3.58627e+07	3.06147e+07	3.64992e+07	3.43927e+07
M130T817	Pyrrolidonecarboxylic acid	130.049	816.6	129.043	9.81172	C5H7NO3	[M+H]+	Carboxylic acids and derivatives	Amino acids, peptides, and analogues	C02237	Global and overview maps	4042-36-8	HMDB0000805	BioDeepDB	2	pos	9.92168e+07	7.91402e+07	9.90502e+07	9.76958e+07	7.31316e+07	8.28025e+07	1.03883e+08	8.23249e+07	8.53418e+07	7.04033e+07	1.05535e+08	9.50551e+07	1.01687e+08	1.34451e+08	9.85052e+07	8.6648e+07	1.22441e+08	1.19267e+08	1.06141e+08	7.35398e+07	1.0623e+08	4.32483e+07	7.92904e+07	1.81744e+08
M496T818	1-palmitoylglycerophosphocholine	496.327	817.8	496.34	25.588	C24H51NO7P	[M+H]+	Glycerophospholipids	Glycerophosphocholines	C04102		17364-16-8	HMDB0062541	BioDeepDB	2	pos	1.25318e+08	4.29411e+07	3.22504e+07	1.98954e+08	5.01733e+06	4.02639e+06	1.09825e+08	1.81005e+08	2.14449e+08	1.52001e+08	1.38996e+08	2.10887e+08	1.05282e+08	1.8023e+08	2.494e+08	1.17548e+08	1.45202e+08	7.65508e+07	1.71114e+07	2.75437e+08	1.28142e+08	1.97346e+08	8.93632e+07	3.60386e+08
M184T824	Phosphorylcholine	184.075	823.5	184.074	4.34606	C5H15NO4P	[M]+	Organonitrogen compounds	Quaternary ammonium salts	C00588	Lipid metabolism; Cancer: overview; Global and overview maps	3616-04-4/107-73-3	HMDB0001565	BioDeepDB	2	pos	1.22345e+07	1.94801e+07	1.02259e+07	3.04048e+07	8.03971e+06	3.58461e+06	4.50836e+06	5.53397e+06	2.18819e+07	4.06963e+07	2.33849e+07	4.21534e+07	7.88903e+06	2.66287e+07	2.24463e+07	1.31404e+07	2.62375e+07	2.19148e+07	8.17295e+06	3.0623e+07	2.30803e+07	2.92424e+07	2.49119e+07	1.57359e+07
M279T750	Sulfamethazine	279.092	750	278.084	4.38565	C12H14N4O2S	[M+H]+	Benzene and substituted derivatives	Benzenesulfonamides	C19530		57-68-1	HMDB0015522	mzCloud	2	pos	1.14861e+07	3.79291e+06	6.35474e+06	1.1567e+06	2.61574e+07	2.06124e+07	2.53642e+07	4.85415e+06	1.40489e+07	2.90883e+07	1.11551e+07	7.04548e+06	1.58048e+07	1.70389e+07	7.77817e+06	2.65724e+07	1.10199e+07	2.49769e+07	2.0262e+07	2.73309e+06	2.28986e+07	1.44398e+07	5.35356e+07	9.00479e+07
M136T139	Dopamine	136.076	139.4	153.079	29.6453	C8H11NO2	[M+H-H2O]+	Phenols	Benzenediols	C03758	Nervous system; Signal transduction; Digestive system; Endocrine system; Neurodegenerative disease; Biosynthesis of other secondary metabolites; Signaling molecules and interaction; Amino acid metabolism; Substance dependence; Cellular community - eukaryotes; Chemical structure transformation maps; Global and overview maps	62-31-7/51-61-6	HMDB0000073	MoNA	2	pos	1.15183e+07	1.01735e+07	4.80226e+06	1.09562e+07	2.3635e+07	1.07671e+07	2.19028e+07	1.0451e+07	3.63676e+07	3.36267e+07	3.41228e+07	3.42479e+07	2.95618e+07	4.19829e+07	3.50564e+07	4.01272e+07	4.75051e+07	3.45395e+07	4.30006e+07	2.65072e+07	4.42626e+07	4.59937e+07	2.1074e+07	2.90969e+07
M244T118	Cytidine	244.092	118.1	243.085	0.217093	C9H13N3O5	[M+H]+			C00475	Membrane transport; Global and overview maps; Nucleotide metabolism	65-46-3		BioDeepDB	2	pos	7.63772e+08	6.68108e+08	1.11101e+09	1.11621e+09	7.14717e+08	1.23709e+09	1.91498e+09	9.75822e+08	1.41013e+09	7.84686e+08	1.19075e+09	1.08626e+09	2.34171e+09	8.40228e+08	1.25871e+09	1.86155e+09	7.95725e+08	1.10451e+09	1.44557e+09	1.40399e+09	1.62702e+09	1.77493e+09	2.68186e+09	2.58623e+09
M102T815	Ethylmethylacetic acid	102.127	814.8	102.068	5.26925	C5H10O2	[M]+	Fatty Acyls	Fatty acids and conjugates	C18319	Digestive system	116-53-0	HMDB0002176	BioDeepDB	2	pos	2.86615e+07	1.81028e+07	2.32848e+07	3.77371e+07	1.8109e+07	3.30236e+06	1.27853e+07	1.09181e+07	3.72225e+07	2.12009e+07	1.06076e+07	1.59436e+07	1.15206e+07	2.63012e+07	2.13641e+07	1.76109e+07	2.32373e+07	2.06101e+07	1.10517e+07	1.11448e+07	2.71177e+07	2.68856e+07	3.0225e+07	1.34505e+07
M195T437	Caffeine	195.088	436.9	194.08	1.66079	C8H10N4O2	[M+H]+	Imidazopyrimidines	Purines and purine derivatives	C07481	Chemical structure transformation maps; Biosynthesis of other secondary metabolites; Global and overview maps	58-08-2	HMDB0001847	GNPS	2	pos	2.20446e+06	2.78235e+06	1.67692e+06	2.4705e+06	2.81359e+06	3.01913e+06	2.79368e+06	3.29763e+06	2.26793e+06	4.87052e+06	2.42875e+06	2.31877e+06	4.45461e+06	2.85151e+06	3.12019e+06	3.24461e+06	1.80882e+06	2.78496e+06	2.65337e+06	2.49055e+06	3.11036e+06	2.81966e+06	2.95925e+06	2.88716e+07
M153T629	N-Acetylhistamine	153.091	628.6	153.09	6.53205	C7H11N3O	[M]+	Carboxylic acids and derivatives	Carboxylic acid derivatives	C05135	Amino acid metabolism	673-49-4	HMDB0013253	MoNA	2	pos	4.94352e+06	2.42491e+06	2.7782e+06	4.68366e+06	2.6953e+06	2.99021e+06	6.54846e+06	4.09372e+06	6.31482e+06	2.2287e+06	3.02404e+06	6.61327e+06	5.11284e+06	4.72927e+06	9.54138e+06	4.58114e+06	3.13422e+06	6.01096e+06	3.96114e+06	7.7894e+06	4.96296e+06	4.4512e+06	5.29199e+06	5.32023e+06
M218T253	Propionylcarnitine	218.139	253.1	217.131	0.348402	C10H19NO4	[M+H]+	Fatty Acyls	Fatty acid esters	C03017		17298-37-2	HMDB0000824	MoNA	2	pos	4.82338e+07	3.46938e+07	4.39515e+07	4.27458e+07	3.56031e+07	5.00081e+07	5.397e+07	4.48237e+07	4.76492e+07	4.87802e+07	5.02991e+07	4.15125e+07	4.84974e+07	3.98403e+07	4.19178e+07	4.04077e+07	3.52524e+07	4.28849e+07	5.15984e+07	4.49115e+07	4.24191e+07	4.85657e+07	4.18338e+07	5.24126e+07
M464T310	Adenylsuccinic acid	464.079	310.5	463.074	4.90434	C14H18N5O11P	[M+H]+	Purine nucleotides	Purine ribonucleotides	C03794	Amino acid metabolism; Global and overview maps; Nucleotide metabolism	19046-78-7	HMDB0000536	MoNA	2	pos	1.0135e+07	7.82675e+06	6.95281e+06	6.52567e+06	8.32527e+06	5.00164e+06	6.61132e+06	6.79942e+06	8.0905e+06	8.99596e+06	1.04098e+07	6.80508e+06	8.43912e+06	6.45276e+06	7.63395e+06	7.9528e+06	7.07391e+06	9.41667e+06	8.63676e+06	6.03563e+06	7.94201e+06	7.11149e+06	8.02366e+06	8.63462e+06
M177T310	Serotonin	177.102	309.5	176.095	0.135515	C10H12N2O	[M+H]+	Indoles and derivatives	Tryptamines and derivatives	C00780	Nervous system; Signal transduction; Sensory system; Digestive system; Target-based classification: G protein-coupled receptors; Development and regeneration; Signaling molecules and interaction; Amino acid metabolism; Cellular community - eukaryotes; Chemical structure transformation maps; Global and overview maps	50-67-9	HMDB0000259	mzCloud	2	pos	1.86432e+06	1.16467e+06	1.81133e+06	2.3504e+06	2.15954e+06	93428.3	1.74545e+06	1.67749e+06	5.11303e+06	3.34314e+06	2.54805e+06	2.92517e+06	623198	959492	2.11793e+06	953899	1.49439e+06	879705	1.56702e+06	2.83096e+06	939841	1.0503e+06	618123	55843.5
M148T114	2-Hydroxyglutarate	148.043	113.8	148.037	1.05037	C5H8O5	[M]+	Hydroxy acids and derivatives	Short-chain hydroxy acids and derivatives	C02630	Carbohydrate metabolism; Global and overview maps	2889-31-8	HMDB0059655	BioDeepDB	2	pos	4.11104e+06	3.02719e+06	1.79721e+06	5.21912e+06	2.04447e+06	3.63806e+06	2.85169e+06	1.65587e+06	1.74447e+06	3.12069e+06	6.38894e+06	2.0491e+06	6.4118e+06	3.65566e+06	2.45835e+06	3.96949e+06	3.83909e+06	1.80716e+06	1.81399e+06	3.10423e+06	2.38218e+06	3.15721e+06	2.83826e+06	2.26077e+06
M288T632	L-Octanoylcarnitine	288.217	632.3	287.21	1.16027	C15H29NO4	[M+H]+	Fatty Acyls	Fatty acid esters	C02838		25243-95-2	HMDB0000791	MoNA	2	pos	5.45399e+06	5.40405e+06	6.27797e+06	2.57778e+06	5.44437e+06	2.20477e+06	5.65609e+06	5.9161e+06	2.89005e+06	8.05152e+06	7.18248e+06	7.1502e+06	9.28819e+06	3.13845e+06	3.4481e+06	2.69132e+06	8.57331e+06	9.3568e+06	6.80165e+06	3.03693e+06	3.1523e+06	7.35739e+06	8.28034e+06	1.14088e+07
M276T103	Saccharopine	276.119	102.6	276.132	0.495516	C11H20N2O6	[M]+	Carboxylic acids and derivatives	Amino acids, peptides, and analogues	C00449	Amino acid metabolism; Global and overview maps	997-68-2	HMDB0000279	BioDeepDB	2	pos	1.22175e+07	1.12577e+07	1.12874e+07	1.13388e+07	1.18423e+07	1.2494e+07	1.20434e+07	1.30388e+07	1.14528e+07	1.2691e+07	1.47708e+07	1.20729e+07	1.33584e+07	1.30771e+07	1.11262e+07	1.28434e+07	8.98127e+06	1.12184e+07	1.0598e+07	9.77274e+06	1.13353e+07	9.90747e+06	1.05893e+07	1.03383e+07
M170T824	Diphenylamine	170.096	823.6	169.089	0.141096	C12H11N	[M+H]+	Benzene and substituted derivatives	Anilines	C11016		122-39-4	HMDB0032562	MoNA	2	pos	2.15545e+07	2.46126e+07	1.32881e+07	4.6586e+07	1.10127e+07	4.68526e+06	5.88817e+06	7.16951e+06	5.76934e+07	5.1696e+07	3.31687e+07	2.79559e+07	1.05813e+07	4.05777e+07	2.95262e+07	1.71255e+07	4.22475e+07	1.66728e+07	2.99574e+07	4.34118e+07	3.89288e+07	2.23654e+07	4.21424e+07	2.53633e+07
M114T419	Epsilon-caprolactam	114.092	418.6	113.084	0.000341549	C6H11NO	[M+H]+	Lactams	Caprolactams	C06593	Xenobiotics biodegradation and metabolism; Global and overview maps	105-60-2	HMDB0062769	BioDeepDB	2	pos	4.25677e+07	1.6453e+07	2.94037e+07	4.08453e+07	1.22579e+07	2.03629e+07	1.7663e+07	2.81787e+07	3.12665e+07	3.88322e+07	3.53829e+07	5.05057e+07	4.44516e+07	4.21655e+07	2.76139e+07	1.19545e+07	2.16557e+07	1.5167e+07	2.65397e+07	2.16824e+07	5.33261e+07	3.05156e+07	5.91594e+07	1.14337e+07
M261T89	D-Glucose 1-phosphate	261.037	89	260.03	0.475028	C6H13O9P	[M+H]+	Organooxygen compounds	Carbohydrates and carbohydrate conjugates	C00103	Endocrine system; Carbohydrate metabolism; Lipid metabolism; Biosynthesis of other secondary metabolites; Metabolism of terpenoids and polyketides; Glycan biosynthesis and metabolism; Chemical structure transformation maps; Global and overview maps	59-56-3	HMDB0001586	mzCloud	2	pos	1.76341e+07	7.84379e+06	1.34016e+07	3.51389e+07	1.44194e+07	1.44517e+07	1.28784e+07	1.2434e+07	1.3033e+07	2.8479e+07	1.02051e+07	1.22495e+07	1.38954e+07	1.22303e+07	1.25231e+07	1.25344e+07	2.15795e+07	1.11723e+07	1.1781e+07	1.69371e+07	1.25784e+07	1.66262e+07	1.00109e+07	1.19659e+07
M146T397	8-Hydroxyquinoline	146.06	397.2	145.053	0.0432401	C9H7NO	[M+H]+			C19434		148-24-3		BioDeepDB	2	pos	3.20168e+06	1.03683e+07	1.34217e+07	1.76329e+07	8.6158e+06	1.0891e+06	1.50746e+07	5.12036e+06	1.74709e+07	2.07582e+06	1.43258e+07	4.85623e+06	1.5882e+07	1.09333e+07	1.45732e+07	1.34081e+07	3.92236e+06	1.33726e+07	2.44195e+06	6.99902e+06	1.22677e+07	2.19493e+07	1.76906e+07	2.51458e+07
M298T332	N7-Methylguanosine	298.114	331.5	298.115	2.34809	C11H16N5O5	[M]+	Purine nucleosides		C20674		20244-86-4	HMDB0001107	mzCloud	2	pos	1.76122e+07	3.99467e+07	5.15096e+06	3.07853e+07	2.09921e+07	1.72716e+07	2.68909e+07	2.12687e+07	2.02361e+07	1.78059e+07	2.54571e+07	1.62668e+07	1.75598e+07	1.50831e+07	1.3004e+07	3.70569e+07	3.28885e+07	3.49032e+07	4.8942e+07	3.35745e+07	2.90653e+07	3.09976e+07	4.53377e+06	3.44632e+06
M206T113	Diethylpropion	206.152	112.8	205.147	11.0404	C13H19NO	[M+H]+	Organooxygen compounds	Carbonyl compounds	C06954		c("90-84-6", "134-80-5")	HMDB0015072	mzCloud	2	pos	3.17135e+07	5.46114e+07	4.58868e+07	2.49476e+07	3.9848e+07	1.84199e+07	3.89232e+07	3.50064e+07	3.52614e+07	3.42599e+07	4.41992e+07	3.6729e+07	1.84281e+07	2.01822e+07	2.86382e+07	1.78895e+07	1.87269e+07	2.29518e+07	1.7904e+07	3.10017e+07	2.65437e+07	2.45678e+07	1.80498e+07	2.07814e+07
M277T115	(5-L-Glutamyl)-L-glutamate	277.103	115	276.096	0.0866104	C10H16N2O7	[M+H]+	Carboxylic acids and derivatives	Amino acids, peptides, and analogues	C05282		1116-22-9	HMDB0011737	mzCloud	2	pos	2.45995e+07	3.21311e+07	3.70483e+07	1.84415e+07	2.54636e+07	1.78134e+07	3.79014e+07	3.73693e+07	2.41178e+07	1.5772e+07	2.23482e+07	3.25212e+07	3.11657e+07	5.26918e+07	3.28639e+07	3.31612e+07	3.87024e+07	4.08462e+07	2.79548e+07	3.1896e+07	2.71549e+07	3.01739e+07	2.68293e+07	5.22468e+07
M123T125	4-Hydroxybenzaldehyde	123.044	125	122.037	1.82048	C7H6O2	[M+H]+	Organooxygen compounds	Carbonyl compounds	C00633	Chemical structure transformation maps; Xenobiotics biodegradation and metabolism; Global and overview maps	123-08-0	HMDB0011718	mzCloud	2	pos	8.86928e+06	2.76139e+07	7.17899e+06	1.13298e+07	1.82921e+07	9.85189e+06	1.20979e+07	7.30172e+06	1.24152e+07	1.52646e+07	1.44221e+07	1.02342e+07	2.21998e+07	1.11485e+07	1.52347e+07	9.40347e+06	1.42774e+07	9.3594e+06	3.07535e+07	1.11496e+07	9.32478e+06	9.88198e+06	8.67846e+06	2.65068e+07
M100T343	N-Methyl-2-pyrrolidinone	100.076	343.1	99.0684	0.759426	C5H9NO	[M+H]+	Extractables/Leachables; Industrial Chemicals; Textile Chemicals/Auxiliary/Dyes; Excipients/Additives/Colorants; Personal Care Products/Cosmetics		C11118		872-50-4		mzCloud	2	pos	4.2657e+06	602750	2.1928e+06	7.09583e+06	2.26015e+06	2.0245e+06	2.21375e+06	7.51918e+06	8.96531e+06	5.56269e+06	2.48335e+06	1.14558e+07	2.66258e+06	2.55072e+06	1.15972e+07	3.20554e+06	7.55324e+06	2.87759e+06	5.94276e+06	3.24239e+06	6.71275e+06	7.02584e+06	9.72929e+06	6.52917e+06
M189T366	Glycyl-leucine	189.123	366.3	188.116	0.93061	C8H16N2O3	[M+H]+	Carboxylic acids and derivatives	Amino acids, peptides, and analogues	C02155		869-19-2	HMDB0000759	mzCloud	2	pos	4.15259e+06	3.50341e+06	3.5757e+06	4.12161e+06	2.56243e+06	4.61953e+06	1.4297e+06	3.06141e+06	4.45325e+06	5.81256e+06	3.57863e+06	1.40949e+06	1.58012e+06	3.64924e+06	5.42413e+06	6.89512e+06	5.97329e+06	7.04303e+06	9.22107e+06	8.77574e+06	5.01725e+06	8.6439e+06	3.85707e+06	5.32803e+06
M250T745	Alprenolol	250.178	744.5	249.173	7.81438	C15H23NO2	[M+H]+	Therapeutics/Prescription Drugs		D07156				mzCloud	2	pos	7.42873e+07	5.92386e+07	6.78081e+07	9.24973e+07	1.15388e+08	6.44586e+07	8.52891e+07	9.747e+07	1.06335e+08	1.04077e+08	7.25106e+07	1.19636e+08	9.9578e+07	7.99079e+07	2.07008e+08	1.68856e+08	1.13111e+08	1.09258e+08	1.58323e+08	1.5938e+08	1.03213e+08	1.56802e+08	1.48847e+08	1.19852e+08
M119T105	Aminomalonic acid	119.016	104.8	119.022	3.38558	C3H5NO4	[M]+	Carboxylic acids and derivatives	Amino acids, peptides, and analogues	C00872		1068-84-4	HMDB0001147	BioDeepDB	2	pos	359897	179306	360770	341034	335604	260093	383657	333908	327568	348696	327602	351865	1.34207e+07	1.02956e+07	2.91098e+06	1.4946e+07	2.10087e+07	2.0345e+07	1.60635e+07	1.80832e+07	2.22841e+07	2.13085e+07	1.2673e+07	9.42917e+06
M168T92	3,4-Dihydroxymandelaldehyde	168.044	91.5	168.042	7.73609	C8H8O4	[M]+	Benzene and substituted derivatives	Phenylacetaldehydes	C05577	Amino acid metabolism; Global and overview maps	13023-73-9	HMDB0006242	BioDeepDB	2	pos	1.20383e+07	8.10064e+06	1.63764e+06	1.2573e+07	1.21646e+07	2.18297e+07	1.68018e+07	2.33444e+07	2.79703e+06	1.27548e+07	2.34311e+06	1.01624e+07	2.07825e+06	2.75571e+06	2.35455e+06	1.18033e+07	1.47465e+06	9.41227e+06	9.26083e+06	175845	8.47427e+06	7.09575e+06	1.31869e+07	1.17805e+07
M255T109_1	Nicotinamide riboside	255.097	108.7	255.098	0.00288623	C11H15N2O5	[M]+	Organooxygen compounds	Carbohydrates and carbohydrate conjugates	C03150	Metabolism of cofactors and vitamins; Global and overview maps; Aging	1341-23-7	HMDB0000855	BioDeepDB	2	pos	4.11226e+06	3.57559e+06	2.7532e+06	6.24951e+06	5.37013e+06	4.73768e+06	5.74878e+06	4.37129e+06	5.26969e+06	3.34727e+06	5.33467e+06	5.08906e+06	4.29081e+06	5.41463e+06	3.69617e+06	3.64212e+06	4.78396e+06	3.99096e+06	4.23743e+06	5.40921e+06	1.41908e+06	4.25267e+06	4.61028e+06	5.237e+06
M489T90_1	Citicoline	489.111	89.8	488.107	7.2395	C14H26N4O11P2	[M+H]+	Pyrimidine nucleotides	Pyrimidine ribonucleotides	C00307	Lipid metabolism; Cancer: overview; Global and overview maps	987-78-0	HMDB0001413	BioDeepDB	2	pos	2.22705e+07	1.20302e+07	2.93316e+07	3.73642e+07	2.54595e+07	1.60645e+07	1.34196e+07	3.02863e+07	3.28455e+07	2.28726e+07	1.78367e+07	3.06148e+07	3.33189e+07	4.28143e+07	3.37336e+07	1.45472e+07	3.86115e+07	2.08284e+07	3.80207e+07	3.99311e+07	3.15117e+07	2.28547e+07	3.49496e+07	4.29216e+07
M121T90	(S)-2-Phenyloxirane	121.07	90.4	120.058	5.68075	C8H8O	[M+H]+			C20782	Xenobiotics biodegradation and metabolism; Global and overview maps	20780-54-5		BioDeepDB	2	pos	1.8512e+07	1.43167e+07	1.64165e+07	1.24632e+07	1.71996e+07	1.10046e+07	1.509e+07	1.06999e+07	2.07523e+07	1.67627e+07	2.1267e+07	1.57537e+07	9.10723e+06	1.66355e+07	1.00386e+07	1.65063e+07	1.03124e+07	8.52397e+06	1.21887e+07	8.65146e+06	1.45383e+07	1.12539e+07	1.26962e+07	8.26884e+06
M289T126	N-Succinyl-2-amino-6-ketopimelate	289.085	126	289.08	18.1047	C11H15NO8	[M]+	Carboxylic acids and derivatives	Amino acids, peptides, and analogues	C04462	Amino acid metabolism; Global and overview maps		HMDB0012266	BioDeepDB	2	pos	1.25446e+06	1.36008e+07	1.37354e+07	2.08821e+06	996133	787393	1.36427e+06	1.05085e+06	6.0308e+06	3.0072e+07	2.42162e+06	8.06914e+06	5.53454e+06	8.09192e+06	1.16213e+07	8.42637e+06	1.6632e+07	2.2708e+06	1.09467e+07	1.34714e+07	1.4407e+07	4.02648e+07	1.8697e+07	8.53661e+06
M249T93	Pindolol	249.158	92.8	248.153	0.000585007	C14H20N2O2	[M+H]+	Indoles and derivatives	Indoles	C07445		13523-86-9	HMDB0015095	BioDeepDB	2	pos	6.71104e+06	5.8069e+06	5.55008e+06	6.49412e+06	9.57391e+06	6.67966e+06	9.15054e+06	6.77611e+06	1.08372e+07	1.07216e+07	1.01484e+07	7.13285e+06	6.67668e+06	6.70346e+06	8.15196e+06	7.72086e+06	1.04708e+07	1.05843e+07	1.01967e+07	7.73602e+06	1.33893e+07	1.47724e+07	1.60436e+07	1.18632e+07
M285T95	(S)-Coclaurine	285.127	94.6	285.137	3.20135	C17H19NO3	[M]+			C06161	Chemical structure transformation maps; Biosynthesis of other secondary metabolites; Global and overview maps	486-39-5		BioDeepDB	2	pos	1.81691e+07	1.53646e+07	1.71134e+07	1.25992e+07	1.95934e+07	7.29037e+06	1.96113e+07	1.73671e+07	6.86781e+06	1.30049e+07	4.37194e+06	3.54235e+06	799888	1.70322e+06	3.06549e+06	1.14523e+07	2.26009e+06	2.52639e+06	1.39584e+07	1.50592e+07	8.4573e+06	1.76044e+06	1.38187e+06	838707
M299T385	D-4'-Phosphopantothenate	299.099	385.1	299.077	2.59446	C9H18NO8P	[M-H2O+NH4]+	Carboxylic acids and derivatives	Amino acids, peptides, and analogues	C03492	Metabolism of cofactors and vitamins; Metabolism of other amino acids; Global and overview maps	5875-50-3	HMDB0001016	BioDeepDB	2	pos	1.27374e+07	8.40126e+07	3.95443e+07	6.71992e+07	4.15235e+07	2.48559e+07	6.37475e+07	4.38354e+07	5.82802e+06	5.35893e+06	6.77021e+07	6.50308e+06	7.23307e+07	5.89492e+07	5.84172e+06	4.24979e+07	5.71067e+07	5.61274e+06	4.6043e+07	1.53187e+07	1.34716e+07	3.90704e+07	4.5203e+06	6.10997e+06
M222T432	Allocystathionine	222.079	432.3	222.067	0.443795	C7H14N2O4S	[M]+	Carboxylic acids and derivatives	Amino acids, peptides, and analogues	C00542		535-34-2	HMDB0000455	BioDeepDB	2	pos	593321	502856	1.17803e+06	305927	619595	353397	1.62351e+06	1.11748e+06	765552	698010	417341	572817	468366	526187	674066	627898	688206	717333	1.28427e+06	471890	2.53269e+06	1.02159e+06	2.61798e+06	1.3264e+06
M127T101_2	1,2,3-Trihydroxybenzene	127.039	101.1	126.032	1.3854	C6H6O3	[M+H]+	Benzene and substituted derivatives	Phenols and derivatives	C01108	Xenobiotics biodegradation and metabolism; Global and overview maps; Target-based classification: Enzymes	87-66-1	HMDB0013674	BioDeepDB	2	pos	1.60847e+07	1.01239e+07	1.32224e+07	2.94013e+06	4.69889e+06	2.97469e+06	1.54986e+07	2.21652e+06	2.32484e+07	2.16173e+07	4.95051e+06	3.4281e+06	1.99181e+07	1.82246e+07	2.17282e+07	2.3267e+07	2.91071e+07	3.50444e+07	3.76939e+07	2.93937e+07	3.36351e+07	4.51321e+07	2.12238e+07	1.85977e+07
M276T242	4-Hydroxycinnamoylagmatine	276.145	242.5	276.159	2.67931	C14H20N4O2	[M]+	Cinnamic acids and derivatives	Hydroxycinnamic acids and derivatives	C04498	Amino acid metabolism; Global and overview maps	7295-86-5	HMDB0033460	BioDeepDB	2	pos	9.74788e+06	6.86161e+06	9.15136e+06	1.26846e+07	1.88789e+07	2.10309e+07	3.04327e+06	1.17889e+07	1.27903e+07	1.52013e+07	5.37274e+06	1.44696e+07	1.67098e+07	1.19987e+07	1.15868e+07	1.74506e+07	1.65129e+07	1.32236e+07	1.15608e+07	1.05053e+07	2.9707e+06	9.80467e+06	1.59916e+07	1.28783e+07
M175T103_2	N-Acetylornithine	175.108	103.4	174.1	0.0173305	C7H14N2O3	[M+H]+	Carboxylic acids and derivatives	Amino acids, peptides, and analogues	C00437	Amino acid metabolism; Global and overview maps	6205-08-9 / 2185-16-2	HMDB0003357	BioDeepDB	2	pos	2.10743e+07	2.14398e+07	1.99219e+07	2.10442e+07	2.22495e+07	1.99066e+07	2.00744e+07	2.14739e+07	1.99575e+07	2.42503e+07	2.68281e+07	2.09506e+07	2.77326e+07	1.96919e+07	1.89984e+07	2.50649e+07	1.94365e+07	2.12874e+07	2.00561e+07	2.041e+07	1.95873e+07	2.05949e+07	2.05817e+07	2.44561e+07
M146T104	2-Keto-6-aminocaproate	146.081	104.3	145.074	0.164292	C6H11NO3	[M+H]+	Keto acids and derivatives	Medium-chain keto acids and derivatives	C03239	Amino acid metabolism; Biosynthesis of other secondary metabolites; Global and overview maps		HMDB0012151	BioDeepDB	2	pos	2.34194e+08	1.42761e+08	1.32367e+08	2.93583e+08	1.0661e+08	1.00029e+08	1.77366e+08	1.53562e+08	1.76121e+08	1.70588e+08	1.27256e+08	1.6072e+08	1.274e+08	1.30149e+08	1.97943e+08	1.94929e+08	1.49856e+08	1.81492e+08	1.89696e+08	1.82057e+08	1.68267e+08	1.55935e+08	2.05235e+07	1.45018e+08
M236T104	Procaine	236.149	104.3	236.153	14.3977	C13H20N2O2	[M]+	Benzene and substituted derivatives	Benzoic acids and derivatives	C07375		59-46-1	HMDB0014859	BioDeepDB	2	pos	1.65038e+06	1.76273e+06	1.8962e+06	1.8694e+06	460164	1.30377e+06	460427	382973	1.66818e+06	2.19916e+06	1.16072e+06	339539	431191	1.25837e+06	1.76903e+06	621722	495933	2.0039e+06	1.51858e+06	1.61269e+06	1.94819e+06	2.0204e+06	1.92162e+06	2.35693e+06
M140T111	4-Amino-5-hydroxymethyl-2-methylpyrimidine	140.082	111.1	139.075	0.171328	C6H9N3O	[M+H]+			C01279	Metabolism of cofactors and vitamins; Global and overview maps; Membrane transport	73-67-6		BioDeepDB	2	pos	6.27382e+06	1.54998e+07	1.19096e+07	6.69966e+06	1.12925e+07	6.76179e+06	9.38218e+06	9.17912e+06	1.84463e+07	1.49368e+07	1.12309e+07	1.61122e+07	1.38873e+07	1.06794e+07	1.6136e+07	1.35752e+07	1.1944e+07	1.25574e+07	1.53392e+07	1.04401e+07	1.09116e+07	1.08236e+07	1.05502e+07	1.2453e+07
M175T113	2-Isopropyl-3-oxosuccinate	175.071	112.7	174.053	0.657333	C7H10O5	[M+H]+	Keto acids and derivatives	Short-chain keto acids and derivatives	C04236	Amino acid metabolism; Global and overview maps		HMDB0012149	BioDeepDB	2	pos	1.39558e+07	1.71886e+07	1.2766e+07	1.69516e+07	1.78503e+07	1.30128e+07	1.57806e+07	2.07959e+07	5.91802e+06	8.34046e+06	1.67796e+07	1.41571e+07	1.83061e+07	991160	1.11986e+07	1.51106e+07	1.07174e+07	2.84149e+07	8.72542e+07	3.12865e+07	1.86656e+07	1.66762e+07	1.61187e+07	1.87693e+07
M172T343	N-Butyryl-L-homoserine lactone	172.097	343.3	171.089	0.441612	C8H13NO3	[M+H]+			C11837	Cellular community - prokaryotes	67605-85-0		BioDeepDB	2	pos	3.14327e+06	3.03956e+06	4.65952e+06	8.13027e+06	6.75484e+06	2.25019e+06	7.78718e+06	2.21821e+06	1.93105e+06	2.15326e+06	2.7317e+06	2.95357e+06	1.9197e+06	9.48437e+06	1.77261e+06	2.46547e+06	6.27217e+06	6.74883e+06	5.00778e+06	4.71641e+06	8.5242e+06	9.10498e+06	1.98297e+06	5.3458e+06
M217T557	N-a-Acetylcitrulline	217.107	557.4	217.106	1.84241	C8H15N3O4	[M]+	Carboxylic acids and derivatives	Amino acids, peptides, and analogues	C15532	Amino acid metabolism; Global and overview maps	33965-42-3	HMDB0000856	BioDeepDB	2	pos	5.87016e+06	6.28434e+06	5.89495e+06	5.01062e+06	2.76022e+07	4.3764e+06	1.94433e+07	1.42527e+07	2.06415e+07	2.07335e+07	1.18705e+07	6.71215e+06	6.90545e+06	2.08624e+07	4.65816e+06	3.41308e+07	2.96431e+07	1.49952e+07	2.47192e+07	1.10971e+07	2.7699e+07	1.60121e+07	3.22366e+07	1.88179e+07
M113T118	3-Methyl-2-oxovaleric acid	113.054	118	130.063	14.7363	C6H10O3	[M+H-H2O]+	Keto acids and derivatives	Short-chain keto acids and derivatives	C03465		1460-34-0	HMDB0000491	BioDeepDB	2	pos	4.62949e+07	2.12564e+07	3.17115e+07	5.21826e+06	3.27348e+07	2.24048e+07	4.27017e+07	3.50309e+07	2.53688e+06	1.97973e+06	5.11254e+06	1.73388e+07	2.76004e+07	1.83531e+06	2.43528e+07	3.66113e+07	3.83192e+06	4.24116e+07	4.71283e+06	2.91902e+06	3.28434e+06	3.63843e+06	2.9227e+06	1.76374e+06
M162T120	Aminoadipic acid	162.076	119.6	161.069	0.00314011	C6H11NO4	[M+H]+	Carboxylic acids and derivatives	Amino acids, peptides, and analogues	C00956	Amino acid metabolism; Biosynthesis of other secondary metabolites; Global and overview maps	542-32-5 / 1118-90-7	HMDB0000510	BioDeepDB	2	pos	1.53409e+07	2.87779e+07	6.29976e+06	4.92522e+07	1.40047e+07	6.85571e+06	4.17018e+07	2.359e+07	1.62591e+07	1.09417e+07	2.34795e+07	1.52434e+07	2.95482e+07	1.95679e+07	2.50009e+07	6.24122e+06	1.18045e+07	2.28735e+07	2.65322e+07	1.52787e+07	2.48562e+07	1.32855e+07	2.54731e+07	1.12161e+07
M114T338	1-Pyrroline-2-carboxylic acid	114.065	338.2	113.048	11.1221	C5H7NO2	[M+H]+	Pyrrolines		C03564	Amino acid metabolism	2139-03-9	HMDB0006875	BioDeepDB	2	pos	4.35211e+06	3.83599e+06	5.11435e+06	3.47687e+06	1.18858e+06	2.3112e+07	7.32886e+06	4.44729e+06	2.20403e+06	3.48141e+06	2.85538e+06	4.74711e+06	1.94343e+08	1.68817e+08	2.10716e+08	2.93562e+08	4.55387e+08	3.15652e+08	2.90288e+08	3.04082e+08	3.71873e+08	3.41057e+08	3.38632e+08	2.22836e+08
M104T122	2-Hydroxybutyric acid	104.053	121.7	104.047	2.77606	C4H8O3	[M]+	Hydroxy acids and derivatives	Alpha hydroxy acids and derivatives	C05984	Carbohydrate metabolism	600-15-7 / 3347-90-8	HMDB0000008	BioDeepDB	2	pos	7.1688e+06	8.82872e+06	6.68446e+06	8.18169e+06	5.9623e+06	5.09697e+06	6.88985e+06	4.42132e+06	6.94645e+06	5.41588e+06	6.88875e+06	7.0323e+06	5.71049e+07	3.50124e+07	8.98592e+07	8.54964e+07	2.16873e+08	1.17818e+08	6.18494e+07	1.03329e+08	9.0702e+07	8.16856e+07	8.48713e+07	8.15947e+07
M133T122	5,6-Dihydro-5-fluorouracil	133.032	121.7	132.034	0.452293	C4H5FN2O2	[M+H]+	Diazines	Pyrimidines and pyrimidine derivatives	C16630	Xenobiotics biodegradation and metabolism	696-06-0	HMDB0060402	BioDeepDB	2	pos	3.44547e+06	1.36682e+08	1.0522e+08	2.15948e+06	3.81966e+06	1.93419e+07	1.23609e+08	1.06346e+08	8.35941e+07	1.50954e+06	1.27873e+08	6.02552e+07	1.52774e+07	9.58246e+07	1.0321e+08	4.67424e+06	3.37877e+06	1.24643e+08	1.14957e+08	1.316e+08	1.04988e+08	1.18093e+08	1.14707e+08	1.00277e+08
M193T122	5,6-Dihydroxy-3-methyl-2-oxo-1,2,5,6-tetrahydroquinoline	193.067	121.9	193.074	3.23063	C10H11NO3	[M]+			C06726				BioDeepDB	2	pos	2.32328e+07	4.43112e+07	1.39847e+07	1.98167e+07	2.34308e+07	1.36024e+07	1.66494e+06	1.96124e+07	3.50288e+07	9.03497e+07	3.60123e+07	3.96097e+07	4.06762e+07	6.3128e+07	3.68561e+07	4.07828e+07	2.24971e+07	8.51389e+07	2.66916e+07	2.65705e+07	5.75002e+07	8.64394e+07	8.46594e+07	6.90893e+07
M172T314	Tetrahydrodipicolinate	172.06	313.9	171.053	0.0379562	C7H9NO4	[M+H]+	Carboxylic acids and derivatives	Amino acids, peptides, and analogues	C03972	Amino acid metabolism; Biosynthesis of other secondary metabolites; Global and overview maps	2353-17-5	HMDB0012289	BioDeepDB	2	pos	4.76425e+06	4.35616e+06	4.489e+06	4.89064e+06	4.33184e+06	5.23782e+06	3.83698e+06	3.63415e+06	5.05422e+06	3.55299e+06	3.89819e+06	4.9283e+06	3.55791e+06	4.43587e+06	4.5355e+06	4.54574e+06	4.77653e+06	3.47426e+06	4.31793e+06	3.92516e+06	4.62005e+06	4.77724e+06	4.18103e+06	4.88847e+06
M165T124	2-Hydroxycinnamic acid	165.054	124.3	164.047	0.447592	C9H8O3	[M+H]+	Cinnamic acids and derivatives	Hydroxycinnamic acids and derivatives	C01772	Amino acid metabolism; Biosynthesis of other secondary metabolites; Global and overview maps	583-17-5 / 614-60-8	HMDB0002641	BioDeepDB	2	pos	3.44867e+07	3.71684e+08	2.50334e+08	2.30736e+08	2.878e+08	4.25479e+08	6.69928e+08	5.06608e+08	4.17148e+08	3.95438e+08	9.00232e+07	4.29325e+08	8.93873e+07	2.82914e+08	5.92193e+08	1.05909e+08	2.56134e+08	3.16365e+08	4.1589e+08	9.22155e+08	4.33017e+08	6.58018e+08	8.72989e+07	4.97506e+08
M140T405	Acetylphosphate	139.984	404.6	139.988	11.4935	C2H5O5P	[M]+	Organic phosphoric acids and derivatives	Phosphate esters	C00227	Carbohydrate metabolism; Energy metabolism; Metabolism of other amino acids; Global and overview maps	590-54-5	HMDB0001494	BioDeepDB	2	pos	5.25931e+07	2.4928e+07	2.57131e+07	7.88288e+06	1.78747e+07	1.84298e+07	4.90161e+07	2.14547e+07	1.41009e+07	6.94221e+06	4.67838e+07	8.16606e+06	1.51395e+07	7.94869e+06	9.50975e+06	1.03997e+07	9.90866e+06	1.55982e+07	7.62447e+06	7.73833e+06	8.39303e+06	8.30585e+06	2.22312e+07	8.13613e+06
M219T139	gamma-Glutamylalanine	219.097	139.3		1.29385	C7H11N2O5R	[M+H]+	Carboxylic acids and derivatives	Amino acids, peptides, and analogues	C03740	Metabolism of other amino acids; Global and overview maps	5875-41-2	HMDB0006248	BioDeepDB	2	pos	285189	508251	276604	582538	1.1898e+06	1.03338e+06	62257.8	563137	703536	829384	877927	824905	1.45394e+06	2.46035e+06	1.53691e+06	2.41137e+06	588012	712019	886984	1.32314e+06	853944	819704	480803	911198
M131T155	5-Amino-2-oxopentanoic acid	131.053	155.3	131.058	2.66992	C5H9NO3	[M]+	Keto acids and derivatives	Short-chain keto acids and derivatives	C01110	Amino acid metabolism; Global and overview maps		HMDB0006272	BioDeepDB	2	pos	8.55002e+06	5.24931e+06	7.42298e+06	6.18989e+06	6.52317e+06	6.94357e+06	5.10894e+06	7.14233e+06	5.78733e+06	6.16224e+06	7.25764e+06	6.24522e+06	7.13274e+06	6.24427e+06	6.82698e+06	6.20228e+06	8.46463e+06	4.89847e+06	7.62046e+06	7.73478e+06	5.51731e+06	6.56478e+06	6.67848e+06	6.37206e+06
M193T173	3-Carbamoyl-2-phenylpropionaldehyde	193.068	172.6	193.074	0.611175	C10H11NO3	[M]+	Benzene and substituted derivatives	Phenylacetaldehydes	C16587	Xenobiotics biodegradation and metabolism		HMDB0060366	BioDeepDB	2	pos	4.48467e+06	3.69526e+06	1.16962e+06	4.32382e+06	4.15664e+06	843280	1.17278e+06	4.54808e+06	5.67403e+06	5.85042e+06	6.84614e+06	5.6779e+06	6.2256e+06	4.87056e+06	6.54274e+06	5.97353e+06	6.29576e+06	6.56922e+06	6.18101e+06	8.25718e+06	8.6946e+06	7.91311e+06	7.0164e+06	6.46752e+06
M153T256	FAPy-adenine	153.066	256.1	153.065	0.0940884	C5H7N5O	[M]+	Diazines	Pyrimidines and pyrimidine derivatives	C06502		5122-36-1	HMDB0004816	BioDeepDB	2	pos	9.181e+06	1.00637e+07	9.5978e+06	8.49928e+06	1.12725e+07	9.60167e+06	7.00815e+06	9.88806e+06	1.03056e+07	9.37552e+06	1.09401e+07	1.15454e+07	9.87309e+06	8.7302e+06	8.28823e+06	7.95418e+06	8.22464e+06	1.02337e+07	1.03211e+07	8.53542e+06	1.0358e+07	7.97066e+06	9.74441e+06	9.76745e+06
M152T303	3,4-Dihydroxyphenylacetaldehyde	152.057	302.5	152.047	0.245189	C8H8O3	[M]+	Benzene and substituted derivatives	Phenylacetaldehydes	C04043	Amino acid metabolism; Neurodegenerative disease; Biosynthesis of other secondary metabolites; Global and overview maps	5707-55-1	HMDB0003791	BioDeepDB	2	pos	240924	253095	290841	338080	972417	210513	373715	408694	1.16126e+06	1.09518e+06	382049	339541	306201	902317	1.07759e+06	806856	345010	677521	1.3297e+06	1.20995e+06	1.27096e+06	1.1699e+06	336272	302490
M137T306	allopurinol	137.046	306.4	136.039	0.045821	C5H4N4O	[M+H]+			C06816		315-30-0		BioDeepDB	2	pos	2.61188e+07	4.80091e+07	4.80089e+07	3.51168e+07	4.96507e+07	3.7304e+07	5.06179e+07	4.86264e+07	4.39758e+07	8.86262e+07	3.5175e+07	4.1406e+07	3.37832e+07	2.88758e+07	5.33611e+07	4.84573e+07	4.1244e+07	3.11444e+07	4.16294e+07	3.69972e+07	5.21728e+07	3.94108e+07	3.51981e+07	5.08819e+07
M271T308	Medicarpin	271.093	307.5	270.089	11.8023	C16H14O4	[M+H]+			C10503	Chemical structure transformation maps; Biosynthesis of other secondary metabolites; Global and overview maps	32383-76-9		BioDeepDB	2	pos	2.15304e+07	2.89697e+06	1.65715e+07	3.26272e+06	5.93379e+06	2.65262e+06	1.05239e+07	2.43646e+07	5.7732e+06	2.58087e+07	9.75644e+06	3.12496e+06	2.46167e+07	3.1426e+06	9.1034e+06	1.76258e+07	1.41477e+07	6.13855e+06	6.60342e+06	8.01777e+06	3.07004e+06	3.78317e+06	2.10537e+06	2.5251e+06
M226T323	2-Amino-2-deoxyisochorismate	226.071	323.1	225.064	0.778517	C10H11NO5	[M+H]+			C18054	Biosynthesis of other secondary metabolites; Global and overview maps; Metabolism of terpenoids and polyketides			BioDeepDB	2	pos	1.48775e+07	1.30245e+07	1.61633e+07	1.30584e+07	1.42521e+07	1.22108e+07	1.42169e+07	1.32219e+07	1.67708e+07	1.60054e+07	1.7648e+07	1.17433e+07	2.0729e+07	2.08511e+07	2.25895e+07	2.09034e+07	2.3228e+07	2.459e+07	3.07004e+07	3.12778e+07	2.56442e+07	2.86554e+07	2.59432e+07	2.70968e+07
M182T327	Beta-Tyrosine	182.081	327.5	181.074	0.0248639	C9H11NO3	[M+H]+	Carboxylic acids and derivatives	Amino acids, peptides, and analogues	C04368	Amino acid metabolism		HMDB0003831	BioDeepDB	2	pos	9.39895e+06	2.00029e+07	8.17579e+06	2.33848e+07	1.08326e+07	9.58619e+06	8.28687e+06	6.14654e+06	8.36281e+06	1.24298e+07	9.94513e+06	9.16879e+06	5.81349e+06	1.05274e+07	1.01162e+07	6.9051e+06	4.0994e+06	6.71375e+06	4.03578e+06	4.43728e+06	3.96544e+06	3.11834e+06	7.03812e+06	1.36886e+07
M151T330	Acetaminophen	151.062	329.7	151.063	0.472566	C8H9NO2	[M]+	Phenols	1-hydroxy-2-unsubstituted benzenoids	C06804	Digestive system	103-90-2	HMDB0001859	BioDeepDB	2	pos	1.53391e+06	4.97047e+06	4.5822e+06	1.87444e+06	5.34706e+06	4.23264e+06	7.80871e+06	7.06074e+06	3.70687e+06	4.0812e+06	2.41739e+06	4.61732e+06	4.40196e+06	3.33856e+06	9.70202e+06	4.51155e+06	5.46524e+06	4.31521e+06	4.3853e+06	5.09624e+06	3.50221e+06	3.21771e+06	1.05547e+07	1.08078e+07
M166T332	7-Methylguanine	166.073	331.5	165.065	0.0128986	C6H7N5O	[M+H]+	Imidazopyrimidines	Purines and purine derivatives	C02242		578-76-7	HMDB0000897	BioDeepDB	2	pos	6.08367e+06	6.56975e+06	5.3349e+06	5.47232e+06	6.51445e+06	5.71199e+06	7.28642e+06	7.13413e+06	5.42472e+06	4.62068e+06	5.89436e+06	4.2323e+06	5.83932e+06	5.07803e+06	3.06083e+06	5.67266e+06	5.95956e+06	6.8558e+06	7.73971e+06	5.71601e+06	6.68407e+06	6.22496e+06	6.16055e+06	4.26459e+06
M107T338	Benzaldehyde	107.049	338.4	106.042	0.224196	C7H6O	[M+H]+	Benzene and substituted derivatives	Benzoyl derivatives	C00261	Xenobiotics biodegradation and metabolism; Global and overview maps	100-52-7	HMDB0006115	BioDeepDB	2	pos	7.16382e+06	5.14224e+06	7.54724e+06	6.76657e+06	6.37672e+06	6.98636e+06	5.67794e+06	7.33412e+06	6.13575e+06	5.27645e+06	7.26133e+06	6.45938e+06	7.4853e+06	6.10814e+06	6.56198e+06	6.21558e+06	6.94425e+06	4.2867e+06	6.61432e+06	6.93967e+06	4.44379e+06	5.9432e+06	5.92861e+06	6.66123e+06
M168T339	D-synephrine	168.091	338.6	167.095	0.485092	C9H13NO2	[M+H]+	Benzene and substituted derivatives	Phenols	C01869		614-35-7	HMDB0062811	BioDeepDB	2	pos	3.80286e+06	1.13452e+07	1.09744e+07	5.1264e+06	1.16892e+07	1.29193e+07	1.51608e+07	1.45185e+07	1.35222e+07	1.57382e+07	9.02803e+06	1.0447e+07	1.65386e+07	8.92982e+06	2.64071e+07	1.93148e+07	9.91907e+06	1.67794e+07	1.79474e+07	1.74518e+07	1.21976e+07	1.31357e+07	2.60119e+07	2.95312e+07
M413T392_4	6-Amino-6-deoxyfutalosine	413.139	391.9	413.134	14.2809	C19H19N5O6	[M]+			C20773	Metabolism of cofactors and vitamins; Global and overview maps			BioDeepDB	2	pos	1.6997e+06	7.17494e+06	1.00769e+06	1.36328e+07	985923	954195	1.70178e+07	1.78395e+07	1.0252e+07	2.00001e+07	8.0732e+06	1.50103e+07	1.98321e+06	2.29915e+06	1.80918e+07	3.3075e+06	3.65459e+07	6.10474e+06	1.6502e+07	3.58822e+07	7.4536e+06	6.58613e+06	5.39056e+07	1.49935e+07
M221T347	Pyrimidodiazepine	221.092	347.4	221.091	1.27121	C9H11N5O2	[M]+			C02587	Metabolism of cofactors and vitamins			BioDeepDB	2	pos	2.14852e+07	7.24268e+07	5.40863e+06	1.25992e+07	1.37297e+07	1.22039e+07	1.58343e+07	1.36712e+07	2.07551e+06	4.46227e+06	6.31692e+06	729927	2.11398e+06	1.06824e+06	4.43093e+06	2.6074e+06	1.43521e+07	1.78536e+06	9.48828e+06	1.79557e+06	430507	485980	929931	310409
M169T350	Pyridoxamine	169.097	349.6	168.09	0.0350261	C8H12N2O2	[M+H]+	Pyridines and derivatives	Pyridoxamines	C00534	Metabolism of cofactors and vitamins; Global and overview maps; Digestive system	85-87-0	HMDB0001431	BioDeepDB	2	pos	1.14046e+06	2.16428e+06	4.66905e+06	3.69478e+06	2.73488e+06	4.19274e+06	3.0484e+06	1.21278e+06	1.14271e+06	3.06042e+06	4.29178e+06	7.11216e+06	1.17137e+07	1.51463e+07	1.43882e+07	1.7091e+07	2.47372e+07	1.75178e+07	1.87024e+07	2.15884e+07	2.84127e+07	2.58328e+07	2.44016e+07	2.45045e+07
M209T366	Pilocarpine	209.128	366.4	208.121	0.0537427	C11H16N2O2	[M+H]+			C07474	Chemical structure transformation maps; Global and overview maps	54-71-7 / 92-13-7	HMDB0015217	BioDeepDB	2	pos	5.89021e+06	4.65346e+06	5.13642e+06	5.22203e+06	6.20396e+06	3.55309e+06	8.59802e+06	276952	3.35682e+06	3.51855e+06	2.32957e+06	3.88642e+06	3.44181e+06	1.67124e+06	2.46418e+06	4.10758e+06	5.56714e+06	5.03066e+06	5.84465e+06	8.21033e+06	4.42258e+06	4.50242e+06	8.11305e+06	1.94174e+06
M232T379	Butyryl-L-carnitine	232.154	378.6	231.147	3.57951e-05	C11H21NO4	[M+H]+			C02862		25576-40-3	HMDB02013	BioDeepDB	2	pos	1.364e+08	8.46814e+07	1.55791e+08	1.36797e+07	1.55288e+08	9.1577e+07	2.04079e+08	1.12966e+08	5.6712e+07	5.38559e+06	1.2631e+07	1.08882e+07	8.95577e+07	5.23613e+06	5.46568e+07	1.45266e+08	4.62025e+06	2.19685e+08	8.6372e+07	3.94083e+07	3.10361e+07	7.981e+06	7.51078e+06	1.38949e+07
M244T373	Ribavirin	244.081	372.8	244.081	2.1734	C8H12N4O5	[M]+			C07234		36791-04-5		BioDeepDB	2	pos	2.71829e+06	8.05255e+06	1.06145e+07	6.06489e+06	1.03017e+07	8.66043e+06	1.10628e+07	7.4021e+06	1.1048e+07	1.22067e+07	1.06597e+07	8.15326e+06	1.10064e+07	1.06588e+07	1.23459e+07	9.47719e+06	1.03468e+07	1.02988e+07	1.2095e+07	9.06823e+06	1.05563e+07	1.01709e+07	7.36919e+06	9.09185e+06
M161T428	Tryptamine	161.107	427.8	160.1	0.0287467	C10H12N2	[M+H]+	Indoles and derivatives	Tryptamines and derivatives	C00398	Biosynthesis of other secondary metabolites; Signaling molecules and interaction; Amino acid metabolism; Chemical structure transformation maps; Global and overview maps	61-54-1	HMDB0000303	BioDeepDB	2	pos	3.03427e+06	4.97315e+06	5.09521e+06	2.66967e+06	1.30841e+06	3.10981e+06	8.36759e+06	1.1811e+06	1.26913e+06	1.14474e+06	854054	4.43822e+06	1.84546e+06	1.90523e+06	1.09126e+06	2.37763e+06	4.34219e+06	5.68299e+06	2.22225e+06	1.85938e+06	1.83944e+06	517240	2.87534e+06	894552
M480T649	26-Hydroxyecdysone	480.275	649.2	480.309	5.13708	C27H44O7	[M]+			C16499	Metabolism of terpenoids and polyketides	52717-49-4		BioDeepDB	2	pos	735166	296426	470167	1.08392e+06	647426	407813	865106	180517	762426	818431	622893	603753	402586	138962	1.14093e+06	757802	591895	919751	607711	975744	296558	587156	456686	575486
M181T461	Dulcin	181.097	460.5	180.09	0.684715	C9H12N2O2	[M+H]+	Benzene and substituted derivatives	N-phenylureas	C19415		150-69-6	HMDB0032565	BioDeepDB	2	pos	348404	966144	1.53227e+06	156658	332515	80585.6	1.25145e+06	1.11319e+06	4.89976e+06	3.82287e+06	126071	2.07074e+06	8.54146e+06	1.1574e+07	1.75186e+06	6.56348e+06	1.10233e+06	9.17496e+06	1.44839e+07	1.24938e+07	1.31226e+07	1.938e+07	1.43912e+07	1.54704e+07
M168T463	Phosphoenolpyruvic acid	167.979	462.9	167.982	18.4547	C3H5O6P	[M]+	Organic phosphoric acids and derivatives	Phosphate esters	C00074	Cancer: overview; Membrane transport; Metabolism of other amino acids; Chemical structure transformation maps; Excretory system; Endocrine system; Carbohydrate metabolism; Biosynthesis of other secondary metabolites; Amino acid metabolism; Energy metabolism; Global and overview maps	138-08-9 / 73-89-2	HMDB0000263	BioDeepDB	2	pos	7.04866e+06	9.09041e+06	9.72826e+06	2.42194e+06	2.19748e+06	6.23257e+06	9.5939e+06	1.19384e+07	7.12406e+06	8.94789e+06	8.67437e+06	1.20645e+07	9.16743e+06	1.8669e+06	1.12701e+07	5.14281e+06	7.75769e+06	1.13656e+07	5.98911e+06	5.5621e+06	1.05949e+07	5.80337e+06	5.33607e+06	5.45088e+06
M219T691	Capsidiol	219.174	691.1	236.178	0.265966	C15H24O2	[M+H-H2O]+	Prenol lipids	Sesquiterpenoids	C09627	Metabolism of terpenoids and polyketides	37208-05-2	HMDB0002352	BioDeepDB	2	pos	9.37353e+06	4.26566e+06	1.19538e+07	6.24161e+06	8.47637e+06	7.5634e+06	5.76284e+06	4.80527e+06	6.00598e+06	6.65079e+06	1.02265e+07	4.35488e+06	7.5298e+06	1.41262e+07	4.62189e+06	6.33101e+06	5.40112e+06	7.7551e+06	1.22928e+07	6.79044e+06	9.28161e+06	7.32345e+06	4.47232e+06	3.0122e+06
M361T488	Nitrendipine	361.139	488	360.132	0.0019133	C18H20N2O6	[M+H]+	Pyridines and derivatives	Hydropyridines	C07713		39562-70-4 / 84845-75-0	HMDB0015187	BioDeepDB	2	pos	878578	3.59447e+06	4.67256e+06	1.81627e+06	5.93801e+06	5.57224e+06	1.58411e+06	8.19368e+06	1.15911e+07	6.74476e+06	6.6664e+06	4.57136e+06	1.98524e+07	6.59187e+06	5.67389e+06	7.23182e+06	3.6832e+06	6.32846e+06	9.87326e+06	9.49894e+06	1.11155e+07	2.64815e+06	6.38901e+06	8.56528e+06
M194T492	Sequoyitol	194.081	492.3	194.079	2.16867	C7H14O6	[M]+	Alcohols and polyols	Cyclic alcohols and derivatives	C03365		523-92-2	HMDB0031449	BioDeepDB	2	pos	5.24838e+06	7.24493e+06	6.73629e+06	4.46696e+06	7.3399e+06	4.84961e+06	5.75145e+06	6.5111e+06	4.40149e+06	8.14375e+06	6.63497e+06	3.74151e+06	4.20693e+06	5.98632e+06	2.48842e+06	7.56088e+06	5.96604e+06	5.4658e+06	6.96684e+06	6.73498e+06	7.18894e+06	5.55638e+06	5.69328e+06	5.5981e+06
M204T511	N5-(L-1-Carboxyethyl)-L-ornithine	204.123	511.4	204.111	0.882223	C8H16N2O4	[M]+			C04210				BioDeepDB	2	pos	4.59332e+06	8.07888e+06	1.49038e+07	6.27765e+06	7.14117e+06	5.62811e+06	6.4944e+06	8.00216e+06	5.65515e+06	2.22749e+06	3.98331e+06	8.0062e+06	7.81387e+06	5.23126e+06	7.28533e+06	5.07107e+06	4.56131e+06	8.92446e+06	9.70865e+06	9.69233e+06	6.83034e+06	6.87621e+06	4.45394e+06	8.74139e+06
M172T517	Gabapentin	172.133	516.5	171.126	0.0140414	C9H17NO2	[M+H]+			C07018		60142-96-3		BioDeepDB	2	pos	1.12542e+08	1.35139e+08	4.59075e+07	3.37826e+07	1.30338e+07	2.88177e+07	8.72104e+06	1.54614e+07	4.12045e+07	2.76983e+08	2.9496e+08	1.17755e+07	9.02999e+06	7.53663e+06	1.3733e+07	1.28464e+07	1.78371e+08	5.85476e+06	1.72252e+07	1.48972e+07	7.52322e+07	3.90418e+07	1.64042e+08	3.22221e+06
M336T517	Isopentenyl adenosine	336.167	517.4	335.159	0.0713932	C15H21N5O4	[M+H]+			C16427	Global and overview maps; Metabolism of terpenoids and polyketides	7724-76-7		BioDeepDB	2	pos	9.28823e+06	8.39221e+06	6.45986e+06	8.12566e+06	1.23025e+06	3.34747e+06	2.4719e+06	1.32765e+07	1.50773e+07	9.0019e+06	1.12903e+07	1.35983e+07	1.45311e+07	1.36641e+07	2.98972e+06	7.71402e+06	7.24113e+06	1.14692e+07	1.68465e+06	8.90234e+06	6.61437e+06	1.55439e+07	2.57711e+06	1.3842e+07
M182T565	1-Methyluric acid	182.048	565.1	182.044	19.775	C6H6N4O3	[M]+	Imidazopyrimidines	Purines and purine derivatives	C16359	Biosynthesis of other secondary metabolites	708-79-2	HMDB0003099	BioDeepDB	2	pos	1.84846e+06	1.12894e+06	2.14186e+06	3.08388e+06	1.41472e+06	622010	1.6888e+06	1.52049e+06	1.95326e+06	2.25165e+06	2.03803e+06	2.06518e+06	2.24199e+06	1.39436e+06	4.0373e+06	1.49269e+06	2.12644e+06	1.0711e+06	1.66025e+06	2.98777e+06	2.06704e+06	2.98647e+06	1.3956e+06	1.22866e+06
M317T626	12-Keto-leukotriene B4	317.211	626.3	334.214	1.18246	C20H30O4	[M+H-H2O]+	Fatty Acyls	Eicosanoids	C05949	Lipid metabolism	136696-10-1	HMDB0004234	BioDeepDB	2	pos	1.60556e+07	1.06759e+07	9.53521e+06	1.14643e+07	9.37162e+06	9.62388e+06	1.26946e+07	1.17033e+07	1.26216e+07	7.21295e+06	1.20829e+07	1.1308e+07	8.80229e+06	8.95272e+06	1.02387e+07	7.85441e+06	9.73652e+06	1.10699e+07	1.09269e+07	7.11063e+06	9.49683e+06	8.40563e+06	1.49725e+07	6.77768e+06
M353T626_2	Prostaglandin I2	353.232	626.3	352.225	1.27433	C20H32O5	[M+H]+			C01312	Circulatory system; Signal transduction; Lipid metabolism; Signaling molecules and interaction; Immune system; Global and overview maps	35121-78-9		BioDeepDB	2	pos	1.67769e+08	1.19984e+08	1.78477e+08	7.94449e+07	1.02017e+08	2.72802e+07	2.06118e+08	2.1593e+08	1.49185e+08	1.38637e+08	1.02855e+08	1.6511e+08	1.29353e+08	9.75217e+07	9.53737e+07	1.46879e+08	1.12921e+08	2.0248e+08	3.28966e+07	1.64321e+08	8.55256e+07	1.34704e+08	7.81503e+07	1.68769e+08
M337T641_2	Prostaglandin E1	337.237	641.2	354.241	0.677063	C20H34O5	[M+H-H2O]+	Fatty Acyls	Eicosanoids	C04741		745-65-3	HMDB0001442	BioDeepDB	2	pos	1.72403e+06	2.16284e+06	1.104e+06	2.14483e+06	1.1569e+06	1.25663e+06	1.38053e+06	1.24642e+06	1.46379e+06	1.39213e+06	1.11116e+06	1.80587e+06	1.92552e+06	1.58222e+06	2.92223e+06	1.42253e+06	2.85793e+06	1.74968e+06	2.49132e+06	2.17621e+06	1.46721e+06	1.38142e+06	1.40965e+06	1.39417e+06
M348T698	Enalaprilat	348.162	697.8	348.168	18.3822	C18H24N2O5	[M]+	Carboxylic acids and derivatives	Amino acids, peptides, and analogues	C11720		76420-72-9	HMDB0041886	BioDeepDB	2	pos	2.83514e+06	2.80428e+06	2.12812e+06	1.50759e+06	1.46448e+06	531145	2.50996e+06	2.65517e+06	3.96906e+06	3.62712e+06	2.76022e+06	1.56314e+06	2.28957e+06	1.6599e+06	3.84532e+06	2.74274e+06	3.71757e+06	3.21789e+06	1.70641e+06	2.78409e+06	3.00124e+06	3.42613e+06	2.0968e+06	1.98081e+06
M195T698	Neocnidilide	195.138	698.4	194.131	0.00202257	C12H18O2	[M+H]+	Lactones	Gamma butyrolactones	C17002		4567-33-3	HMDB0034450	BioDeepDB	2	pos	4.4846e+06	2.82472e+06	1.47399e+06	4.64543e+06	936224	625208	3.35794e+06	4.14055e+06	4.54982e+06	3.24499e+06	4.87331e+06	4.70787e+06	3.81035e+06	4.23561e+06	8.71363e+06	3.2812e+06	5.40885e+06	3.17934e+06	1.55313e+06	5.72932e+06	4.78783e+06	4.84315e+06	2.96964e+06	6.12875e+06
M301T698	9-cis-Retinoic acid	301.216	698.4	300.209	0.762777	C20H28O2	[M+H]+	Prenol lipids	Retinoids	C15493	Cancer: overview; Metabolism of cofactors and vitamins; Endocrine system; Cancer: specific types; Immune system	5300-03-8	HMDB0002369	BioDeepDB	2	pos	2.31869e+06	4.41533e+06	5.85481e+06	2.68747e+06	1.00424e+07	1.38123e+07	4.03434e+06	3.60669e+06	3.59921e+06	3.57983e+06	4.77432e+06	4.49919e+06	4.5808e+06	3.14279e+06	4.00414e+06	4.83689e+06	4.80404e+06	3.31202e+06	8.33882e+06	2.85881e+06	4.73892e+06	2.60078e+06	5.78741e+06	3.46403e+06
M584T758_2	Avermectin A1b aglycone	584.334	757.7	584.335	0.751055	C34H48O8	[M]+			C11964	Global and overview maps; Metabolism of terpenoids and polyketides			BioDeepDB	2	pos	2.24446e+07	3.28291e+07	2.43189e+07	2.6561e+07	3.32463e+07	3.10837e+07	3.33069e+07	3.3088e+07	4.14906e+07	4.46324e+07	3.96596e+07	4.23056e+07	3.52462e+07	2.32309e+07	3.89419e+07	2.20803e+07	2.77532e+07	2.75974e+07	2.73496e+07	3.82619e+07	3.00976e+07	3.00854e+07	4.54417e+07	3.09816e+07
M179T794	Methyleugenol	179.107	794.1	178.099	0.0135353	C11H14O2	[M+H]+	Benzene and substituted derivatives	Methoxybenzenes	C10454	Biosynthesis of other secondary metabolites	93-15-2	HMDB0031864	BioDeepDB	2	pos	3.16235e+07	1.89488e+07	4.73638e+07	4.52035e+07	2.17243e+07	3.97458e+07	3.49329e+07	2.22329e+07	2.91524e+07	3.45294e+07	1.93518e+07	3.8666e+07	2.36918e+07	3.78566e+07	3.00839e+07	4.56381e+07	4.88105e+07	5.02533e+07	5.51475e+07	4.45043e+07	2.77971e+07	1.60206e+07	1.83185e+07	2.38871e+07
M167T823	3-(2-Hydroxyphenyl)propanoic acid	167.07	823.2	166.063	0.618175	C9H10O3	[M+H]+	Phenylpropanoic acids		C01198	Amino acid metabolism; Xenobiotics biodegradation and metabolism; Global and overview maps	495-78-3	HMDB0033752	BioDeepDB	2	pos	3.56928e+07	1.20124e+08	4.41979e+07	1.12742e+08	3.84342e+07	3.20305e+07	4.21262e+07	2.1716e+07	1.15507e+08	1.13323e+08	4.51116e+07	5.02149e+07	4.5931e+07	7.73064e+07	1.3859e+08	1.01993e+08	3.48452e+07	8.33453e+07	3.09334e+07	3.33644e+07	5.41145e+07	4.12867e+07	1.37598e+08	1.7866e+08
M195T823	3-Methyl-L-tyrosine	195.102	823.2	195.089	0.103119	C10H13NO3	[M]+			C20800				BioDeepDB	2	pos	2.24528e+08	2.48769e+08	2.04976e+08	3.78787e+08	5.71215e+07	5.36882e+07	1.28985e+08	1.18923e+08	3.65493e+08	3.27687e+08	2.03468e+08	3.03076e+08	1.23882e+08	2.98122e+08	5.02503e+08	2.85007e+08	2.68889e+08	2.54298e+08	3.27174e+08	3.92816e+08	2.39995e+08	2.41404e+08	2.329e+08	2.82129e+08
M123T91	Sulfoacetaldehyde	122.976	90.6	123.983	0.618008	C2H4O4S	[M-H]-	Organic oxides	Carbonyl compounds	C00593	Energy metabolism; Metabolism of other amino acids; Global and overview maps	32797-12-9		MetaDNA	2	neg	1.87018e+06	1.31111e+06	2.10678e+06	1.90489e+06	3.03446e+06	1.59958e+06	2.19511e+06	1.7616e+06	3.02952e+06	5.52993e+06	3.62254e+06	2.33507e+06	2.49224e+06	2.26598e+06	2.51378e+06	2.00937e+06	516722	2.41633e+06	1.89545e+06	2.09724e+06	2.68333e+06	2.84496e+06	3.54532e+06	4.51653e+06
M155T97	Uracil 5-carboxylate	155.01	96.7	156.017	0.490292	C5H4N2O4	[M-H]-	Azacyclic compounds	Carboxylic acids	C03030		23945-44-0		MetaDNA	2	neg	6.15604e+06	6.44625e+06	6.14584e+06	4.66723e+06	6.39185e+06	5.53819e+06	6.67194e+06	1.59596e+06	6.87709e+06	9.9539e+06	6.11569e+06	7.4853e+06	4.51766e+06	4.55876e+06	3.78679e+06	4.3075e+06	2.78292e+06	5.45155e+06	4.72846e+06	4.39514e+06	3.40424e+06	3.83351e+06	2.17168e+06	4.45472e+06
M363T76	Xanthylic acid	363.033	76.1	364.042	4.4734	C10H13N4O9P	[M-H]-	Azacyclic compounds	Alcohols and polyols	C00655	Chemical structure transformation maps; Global and overview maps; Nucleotide metabolism	523-98-8	HMDB0001554	MetaDNA	2	neg	5.05156e+06	3.79028e+06	1.98802e+06	3.158e+06	3.75704e+06	2.21179e+06	2.42011e+06	3.83997e+06	4.16666e+06	3.54485e+06	3.06572e+06	3.36079e+06	2.93397e+06	1.94801e+06	3.77028e+06	4.44562e+06	3.7041e+06	3.81834e+06	4.20194e+06	3.67166e+06	2.53713e+06	1.57769e+06	4.13678e+06	3.08604e+06
M101T108	Succinic acid semialdehyde	101.024	107.6	102.032	1.22743	C4H6O3	[M-H]-	Carboxylic acids and derivatives	Carbonyl compounds	C00232	Metabolism of cofactors and vitamins; Carbohydrate metabolism; Amino acid metabolism; Energy metabolism; Cellular community - prokaryotes; Global and overview maps	692-29-5	HMDB0001259	MetaDNA	2	neg	5.83459e+06	1.21276e+07	2.67381e+06	2.71944e+06	9.53341e+06	7.44727e+06	1.61202e+07	8.00392e+06	7.84076e+06	6.64133e+06	8.67838e+06	2.51115e+06	8.30047e+06	7.41984e+06	6.92904e+06	9.77479e+06	2.16322e+06	5.32638e+06	2.27171e+06	7.73347e+06	8.94396e+06	3.95849e+06	8.10375e+06	2.33663e+06
M163T396	4-Hydroxycinnamic acid	163.04	395.5	164.047	0.147203	C9H8O3	[M-H]-	Benzene and substituted derivatives	1-hydroxy-2-unsubstituted benzenoids	C00811	Metabolism of cofactors and vitamins; Biosynthesis of other secondary metabolites; Amino acid metabolism; Chemical structure transformation maps; Global and overview maps	7400-08-0/7400-08-0 501-98-4/501-98-4	HMDB0002035	MetaDNA	2	neg	1.89209e+06	2.37001e+06	1.86346e+06	3.31899e+06	1.32108e+06	910174	2.07001e+06	2.42452e+06	2.34966e+06	2.30249e+06	3.07067e+06	2.04372e+06	83301.5	133786	96445.9	98481.4	110334	99315.5	32009.1	156039	61449.1	227150	15649	42969.9
M135T165	L-Homocysteine	135.032	165.2	135.035	23.6975	C4H9NO2S	[M]-	Carboxylic acids and derivatives	Alkylthiols	C00155	Drug resistance: antineoplastic; Amino acid metabolism; Energy metabolism; Immune system; Global and overview maps	6027-13-0		MetaDNA	2	neg	3.79796e+07	3.04537e+07	3.29709e+07	3.59399e+07	2.70054e+07	2.25629e+07	4.00955e+07	2.57234e+07	4.03673e+07	3.0272e+07	2.85249e+07	3.56719e+07	1.18274e+07	1.93755e+07	3.78594e+07	1.31089e+07	4.21587e+07	3.77614e+07	4.03356e+07	1.63052e+07	1.41009e+07	1.94277e+07	1.61912e+07	1.75015e+07
M208T498	L-Arogenate	208.062	497.6	227.079	5.71948	C10H13NO5	[M-H2O-H]-	Carboxylic acids and derivatives	Alcohols and polyols	C00826	Amino acid metabolism; Global and overview maps	53078-86-7		MetaDNA	2	neg	1.3899e+06	1.12614e+06	1.10914e+06	1.39328e+06	1.2103e+06	849081	1.21046e+06	1.77211e+06	1.89774e+06	2.3692e+06	1.93857e+06	1.54778e+06	1.61628e+06	1.42433e+06	1.78567e+06	2.32437e+06	2.60232e+06	1.68734e+06	1.82341e+06	3.15052e+06	2.38686e+06	1.73577e+06	1.66158e+06	1.63121e+06
M221T336	N-Acetylmannosamine	221.093	336.2	221.09	14.0214	C8H15NO6	[M]-	Carboxylic acids and derivatives	Alcohols and polyols	C00645	Carbohydrate metabolism; Glycan biosynthesis and metabolism; Global and overview maps	7772-94-3/3615-17-6	HMDB0001129	MetaDNA	2	neg	193937	522147	647716	218329	1.07077e+06	406431	256283	240848	486842	208555	123508	123609	815961	770485	925564	413669	799968	150415	93160.3	83339.3	232232	69846.3	699874	331676
M251T293_2	Deoxyadenosine	251.104	293.4	251.102	7.16841	C10H13N5O3	[M]-	Azacyclic compounds	Alcohols and polyols	C00559	Membrane transport; Global and overview maps; Nucleotide metabolism	958-09-8	HMDB0000101	MetaDNA	2	neg	2241.87	8597.34	6978.72	8388.06	29576.2	3825.61	12348	12031.2	14611.2	11022.1	2227	13268.5	291123	353261	269209	573790	638980	475655	397557	600262	472583	365487	371208	326804
M370T73	Acetyl adenylate	370.054	72.6	389.074	2.99955	C12H16N5O8P	[M-H2O-H]-	Azacyclic compounds	Alcohols and polyols	C05993	Carbohydrate metabolism; Global and overview maps; Nucleotide metabolism	13015-87-7	HMDB0006880	MetaDNA	2	neg	566463	1.50516e+06	3.49904e+06	1.76291e+06	4.12007e+06	9.39486e+06	5.29323e+06	3.72671e+06	2.89011e+06	3.72525e+06	4.55415e+06	3.78283e+06	3.30531e+06	2.80202e+06	3.16486e+06	8.13977e+06	5.99668e+06	5.20355e+06	7.22621e+06	7.06287e+06	4.8942e+06	6.16168e+06	2.76377e+06	1.66711e+06
M516T98_2	Lipoyl-AMP	516.072	98.1	535.096	10.6767	C18H26N5O8PS2	[M-H2O-H]-	Azacyclic compounds	1,2-dithiolanes	C16238	Metabolism of cofactors and vitamins; Global and overview maps		HMDB0059635	MetaDNA	2	neg	1.54894e+06	1.10464e+06	3.37955e+06	2.10553e+06	1.27603e+06	1.11569e+06	1.85057e+06	2.34239e+06	2.69497e+06	3.33085e+06	2.29863e+06	2.0595e+06	1.97366e+06	1.85946e+06	1.99915e+06	1.33128e+06	1.7663e+06	1.29014e+06	1.8586e+06	1.67005e+06	2.2015e+06	2.90759e+06	2.62192e+06	2.4791e+06
M116T287	4-Methylaminobutyrate	116.071	286.7	117.079	7.9606	C5H11NO2	[M-H]-	Carboxylic acids and derivatives	Amines	C15987	Metabolism of cofactors and vitamins; Global and overview maps	1119-48-8		MetaDNA	2	neg	1.83737e+06	3.75316e+06	2.46069e+06	4.55778e+06	1.7564e+06	2.6586e+06	442019	4.66797e+06	2.2894e+06	2.70315e+06	2.31163e+06	2.04575e+06	4.201e+06	2.08246e+06	1.88132e+06	2.03431e+06	1.11023e+06	2.3076e+06	2.21235e+06	2.82508e+06	1.18136e+06	2.37687e+06	805707	1.82441e+06
M509T101	2-O-[2-O-(alpha-D-Mannopyranosyl)-alpha-D-glucopyranosyl]-3-phospho-D-glycerate	509.092	100.6	510.099	1.52428	C15H27O17P	[M-H]-			C19793				MetaDNA	2	neg	505445	946969	858439	2.2192e+06	1.63716e+06	351959	2.73641e+06	2.87347e+06	745672	1.14549e+06	845001	1.67946e+06	1.97085e+06	1.11578e+06	1.20526e+06	258394	1.09476e+06	2.25861e+06	736740	542050	772091	785739	1.1738e+06	1.4605e+06
M506T89_1	ATP	505.984	88.8	506.996	8.54565	C10H16N5O13P3	[M-H]-	Azacyclic compounds	Alcohols and polyols	C00002	Endocrine and metabolic disease; Membrane transport; Transport and catabolism; Signal transduction; Cell growth and death; Sensory system; Endocrine system; Environmental adaptation; Cardiovascular disease; Neurodegenerative disease; Biosynthesis of other secondary metabolites; Signaling molecules and interaction; Metabolism of terpenoids and polyketides; Nucleotide metabolism; Infectious disease…	56-65-5/987-65-5	HMDB0000538	MetaDNA	2	neg	1.75089e+07	1.22823e+07	1.44851e+07	1.47254e+07	1.37089e+07	1.62519e+07	1.4409e+07	1.49203e+07	2.17346e+07	1.7283e+07	2.01792e+07	1.49608e+07	1.62148e+07	1.47922e+07	1.4019e+07	1.70568e+07	1.44146e+07	1.45902e+07	1.42785e+07	1.23173e+07	1.72685e+07	1.50687e+07	9.50666e+06	1.03051e+07
M131T89	(-)-Isopiperitenone	131.083	89	150.105	26.0134	C10H14O	[M-H2O-H]-	Organic oxides	Carbonyl compounds	C02485	Global and overview maps; Metabolism of terpenoids and polyketides	80995-97-7		MetaDNA	2	neg	6.50987e+07	1.54266e+07	4.71254e+07	2.6974e+07	1.18381e+07	3.0475e+07	3.16935e+07	2.03511e+07	6.04422e+07	8.33379e+07	3.8408e+07	2.24976e+07	3.58985e+07	2.96393e+07	5.55013e+07	2.4671e+07	3.18924e+07	3.36462e+07	1.66362e+07	3.13208e+07	3.21969e+07	2.59726e+07	2.46223e+07	2.74235e+07
M311T767	9,12,13-TriHOME	311.222	767	330.241	0.289182	C18H34O5	[M-H2O-H]-	Carboxylic acids and derivatives	Alcohols and polyols	C14833	Lipid metabolism	97134-11-7	HMDB0004708	MetaDNA	2	neg	2.51793e+07	3.93738e+07	8.01672e+06	3.57297e+07	1.80631e+07	9.13467e+06	1.73388e+07	6.10342e+06	9.38816e+06	1.94552e+07	1.91775e+07	1.30176e+07	1.88309e+07	2.66838e+07	9.03683e+06	9.8327e+06	1.19164e+07	8.18624e+06	1.63739e+07	1.11731e+07	1.14829e+07	7.44876e+06	1.12848e+07	7.47142e+06
M333T756	15-Keto-prostaglandin F2a	333.206	756.3	352.225	0.930354	C20H32O5	[M-H2O-H]-	Carboxylic acids and derivatives	Acryloyl compounds	C05960	Lipid metabolism	35850-13-6	HMDB0004240	MetaDNA	2	neg	6.23518e+06	3.66158e+06	6.85128e+06	2.28235e+06	3.24756e+06	2.87851e+06	5.77454e+06	6.03662e+06	4.58297e+06	4.02771e+06	6.45036e+06	5.95233e+06	4.70647e+06	8.8581e+06	8.77335e+06	6.52478e+06	8.94717e+06	4.58725e+06	6.49191e+06	5.73279e+06	3.03836e+06	8.05117e+06	1.68165e+06	6.06362e+06
M312T767	9,10-12,13-Diepoxyoctadecanoate	312.226	767	312.23	14.0922	C18H32O4	[M]-	Carboxylic acids and derivatives	Carbonyl compounds	C14836	Lipid metabolism			MetaDNA	2	neg	1.15019e+07	9.95766e+06	7.08077e+06	4.23786e+07	1.31888e+07	8.7383e+06	7.05687e+06	9.66026e+06	9.21902e+06	3.41901e+06	8.53262e+06	2.56159e+06	3.52333e+06	3.62816e+06	4.33617e+06	1.13873e+07	9.68414e+06	1.03463e+07	6.47328e+06	2.8554e+06	9.06385e+06	7.2061e+06	9.21926e+06	1.1385e+07
M329T615	9,10-Dihydroxy-12,13-epoxyoctadecanoate	329.232	615.1	330.241	2.80652	C18H34O5	[M-H]-	Carboxylic acids and derivatives	Alcohols and polyols	C14837	Lipid metabolism			MetaDNA	2	neg	1.61387e+07	2.61366e+07	1.72288e+07	2.24049e+07	1.54651e+07	8.03336e+06	2.08019e+07	1.3619e+07	1.64328e+07	1.48264e+07	2.49029e+07	2.03318e+07	2.07598e+07	1.98373e+07	2.3675e+07	8.02362e+06	2.46501e+07	2.35994e+07	1.09178e+07	2.40301e+07	2.63851e+07	2.55641e+07	9.6697e+06	3.01173e+07
M135T836	Phenyl acetate	134.895	836.4	136.052	10.4134	C8H8O2	[M-H]-			C00548		122-79-2		BioDeepDB	2	neg	3.49216e+07	5.01416e+07	3.49653e+07	6.81004e+07	3.69998e+07	4.12685e+07	3.41526e+07	3.4694e+07	4.447e+07	5.21347e+07	5.89717e+07	2.44771e+07	2.53498e+07	5.10756e+07	1.64838e+07	5.12579e+07	4.97078e+07	5.41806e+07	4.65446e+07	7.4146e+07	5.76954e+07	5.50257e+07	6.6959e+07	4.79296e+07
M116T590	5-Aminopentanoate	116.073	589.8	117.079	7.547	C5H11NO2	[M-H]-	Carboxylic acids and derivatives	Amino acids, peptides, and analogues	C00431	Amino acid metabolism; Global and overview maps	660-88-8	HMDB0003355	mzCloud	2	neg	2.84263e+06	2.1911e+06	2.09808e+06	2.84018e+06	1.57557e+06	766765	2.10689e+06	2.24461e+06	2.45006e+06	2.32492e+06	2.46916e+06	1.51341e+06	2.53422e+06	2.49029e+06	3.28911e+06	2.55098e+06	2.37061e+06	2.23223e+06	1.76926e+06	3.6464e+06	2.03896e+06	2.34136e+06	1.59777e+06	2.98484e+06
M173T536	4-Quinolinecarboxylic acid	173.118	536.3	173.048	7.49758	C10H7NO2	[M]-			C06414		486-74-8		BioDeepDB	2	neg	1.07361e+06	1.61306e+06	1.44796e+06	4.86813e+06	3.02371e+06	410917	1.31584e+06	2.4686e+06	1.14879e+07	6.44162e+06	1.76988e+06	4.04486e+06	3.06375e+06	8.0758e+06	7.56144e+06	1.12907e+06	2.20346e+06	1.17456e+06	3.38033e+06	2.20026e+06	1.92896e+06	5.67773e+06	8.45707e+06	1.24595e+07
M135T56	Phenylacetic acid	134.865	55.6	136.052	11.6876	C8H8O2	[M-H]-	Benzene and substituted derivatives		C07086	Amino acid metabolism; Xenobiotics biodegradation and metabolism; Global and overview maps	103-82-2	HMDB0000209	BioDeepDB	2	neg	8.16323e+06	3.70451e+06	1.2229e+07	4.21749e+06	1.31209e+07	1.198e+07	4.05867e+06	1.3108e+07	3.21868e+06	1.26839e+07	1.44554e+07	1.16282e+07	9.87056e+06	1.00125e+07	6.26997e+06	2.8274e+06	1.8973e+07	3.24939e+06	8.86196e+06	1.25269e+07	1.44506e+07	2.86613e+06	9.35472e+06	2.30979e+06
M124T53	1-Naphthylamine	123.902	52.5	143.073	9.49245	C10H9N	[M-H2O-H]-			C14790	Xenobiotics biodegradation and metabolism	134-32-7		BioDeepDB	2	neg	4.30261e+06	4.31374e+06	4.13326e+06	4.46379e+06	2.72718e+06	3.94438e+06	4.18322e+06	4.67009e+06	4.88037e+06	7.08452e+06	4.95176e+06	5.67163e+06	4.00398e+06	5.22169e+06	4.18383e+06	5.43209e+06	3.84319e+06	4.41208e+06	3.68418e+06	5.57976e+06	3.9644e+06	5.40313e+06	4.43204e+06	4.26887e+06
M191T81_2	Quinate	191.056	81.3	192.063	0.125618	C7H12O6	[M-H]-			C00296	Amino acid metabolism; Global and overview maps	77-95-2		BioDeepDB	2	neg	7.92155e+06	8.2794e+06	7.97414e+06	8.42027e+06	7.65962e+06	8.18097e+06	8.2182e+06	7.93338e+06	7.90672e+06	9.00818e+06	8.60789e+06	8.36182e+06	7.97116e+06	9.72472e+06	8.00601e+06	8.98088e+06	8.31009e+06	8.48203e+06	8.02592e+06	8.4179e+06	8.62922e+06	8.3429e+06	7.62416e+06	7.63083e+06
M175T179	Guanidinosuccinic acid	174.955	179.1	175.059	0.997187	C5H9N3O4	[M]-	Carboxylic acids and derivatives	Amino acids, peptides, and analogues	C03139		6133-30-8	HMDB0003157	BioDeepDB	2	neg	1.60116e+07	1.29494e+07	1.54783e+07	1.33684e+07	1.81984e+07	1.96211e+07	1.75362e+07	1.57721e+07	9.45388e+06	1.16881e+07	9.29385e+06	1.05573e+07	1.57655e+07	3.88305e+06	1.4973e+07	1.19872e+07	1.27097e+07	7.2792e+06	3.08018e+06	1.03501e+07	9.92414e+06	1.00516e+07	1.54266e+07	3.00411e+06
M239T103	Anserine	239.114	102.8	240.122	3.44605	C10H16N4O3	[M-H]-	Peptidomimetics	Hybrid peptides	C01262	Amino acid metabolism; Metabolism of other amino acids; Global and overview maps	584-85-0	HMDB0000194	BioDeepDB	2	neg	3.90531e+06	3.29596e+06	1.17719e+07	5.80607e+06	5.59389e+06	2.27934e+06	8.90183e+06	5.35047e+06	7.93513e+06	7.83936e+06	6.5532e+06	8.93309e+06	9.55243e+06	6.72593e+06	5.84449e+06	1.04228e+07	1.79423e+07	1.46202e+07	1.55563e+07	1.32735e+07	1.38365e+07	1.52245e+07	9.62203e+06	8.46795e+06
M124T108	Taurine	124.007	107.6	125.015	0.193537	C2H7NO3S	[M-H]-	Organic sulfonic acids and derivatives	Organosulfonic acids and derivatives	C00245	Membrane transport; Metabolism of other amino acids; Lipid metabolism; Signaling molecules and interaction; Energy metabolism; Global and overview maps	107-35-7	HMDB0000251	BioDeepDB	2	neg	4.56364e+07	4.68498e+07	8.55374e+07	3.68823e+07	3.23315e+07	1.60943e+07	4.63091e+07	1.02218e+07	4.29595e+07	5.31352e+07	2.38094e+07	2.05053e+07	2.73879e+07	1.20366e+07	1.91264e+08	4.02599e+07	1.48497e+07	1.70479e+07	2.52353e+07	3.32615e+07	2.57424e+07	4.09649e+07	1.05008e+08	8.11377e+07
M171T121_1	3-Dehydroshikimate	171.03	121.3	172.037	0.444366	C7H8O5	[M-H]-			C02637	Chemical structure transformation maps; Amino acid metabolism; Global and overview maps; Metabolism of terpenoids and polyketides	2922-42-1		BioDeepDB	2	neg	2.26749e+07	2.63801e+07	3.10445e+07	2.76489e+07	1.84967e+07	1.38318e+07	1.93863e+07	2.07699e+07	2.26812e+07	2.63703e+07	1.62936e+07	1.78158e+07	1.69523e+07	1.16445e+07	2.34889e+07	1.29464e+07	1.16531e+07	1.78987e+07	1.02305e+07	1.31911e+07	9.81847e+06	1.115e+07	8.78207e+06	9.02685e+06
M249T84	gamma-Glutamylcysteine	248.959	84	250.062	2.11475	C8H14N2O5S	[M-H]-	Carboxylic acids and derivatives	Amino acids, peptides, and analogues	C00669	Cell growth and death; Metabolism of other amino acids; Global and overview maps	636-58-8	HMDB0001049	BioDeepDB	2	neg	4.13807e+07	6.41488e+07	1.89551e+07	6.05852e+07	4.15261e+07	4.88033e+07	1.74878e+07	3.86684e+07	3.91083e+07	4.25597e+07	1.54497e+07	8.70134e+06	3.79767e+07	1.15227e+07	3.54388e+07	4.93082e+07	2.84346e+07	5.11889e+07	3.23139e+07	3.84598e+07	3.4242e+07	3.57666e+07	2.60579e+07	5.85819e+06
M188T257	Azelaic acid	188.098	257.5	188.105	9.5978	C9H16O4	[M]-	Fatty Acyls	Fatty acids and conjugates	C08261		123-99-9	HMDB0000784	BioDeepDB	2	neg	1.3429e+06	1.75667e+06	1.2687e+06	1.28995e+06	1.34055e+06	1.22468e+06	2.05408e+06	943690	596204	712116	1.80099e+06	783234	1.04688e+06	2.30789e+06	742612	1.29582e+06	1.23648e+06	1.98458e+06	962766	945961	1.23401e+06	1.05468e+06	473796	1.22548e+06
M173T70	Citric acid	173.009	70.1	192.027	3.98822	C6H8O7	[M-H2O-H]-	Carboxylic acids and derivatives	Tricarboxylic acids and derivatives	C00158	Cancer: overview; Chemical structure transformation maps; Signal transduction; Sensory system; Endocrine system; Carbohydrate metabolism; Biosynthesis of other secondary metabolites; Metabolism of terpenoids and polyketides; Amino acid metabolism; Energy metabolism; Global and overview maps	77-92-9 / 126-44-3	HMDB0000094	BioDeepDB	2	neg	7.25608e+06	8.09074e+06	4.55347e+06	9.56525e+06	6.12793e+06	7.42643e+06	8.06696e+06	7.80691e+06	9.0471e+06	1.07644e+07	1.14584e+07	7.72176e+06	7.03125e+06	6.75412e+06	4.75887e+06	6.67613e+06	8.99539e+06	8.16064e+06	9.64322e+06	7.08115e+06	8.102e+06	9.58448e+06	9.30019e+06	7.30257e+06
M371T810	Deoxycorticosterone acetate	371.065	809.5	372.23	3.11788	C23H32O4	[M-H]-			C14554		56-47-3		BioDeepDB	2	neg	2.76581e+07	2.89381e+07	2.11018e+07	1.7561e+07	1.99729e+07	8.94776e+06	1.51462e+07	2.02083e+07	3.20632e+06	4.01876e+06	1.25836e+06	4.6692e+06	5.18626e+06	4.73095e+06	8.9912e+06	7.50355e+06	4.59711e+06	4.56937e+06	7.34889e+06	3.76424e+06	1.07959e+06	2.22059e+06	1.28474e+06	5.32784e+06
M243T167	Uridine	243.061	166.7	244.07	1.79142	C9H12N2O6	[M-H]-	Pyrimidine nucleosides		C00299	Membrane transport; Global and overview maps; Nucleotide metabolism	58-96-8	HMDB0000296	BioDeepDB	2	neg	8.21658e+07	6.14946e+07	6.11791e+07	1.19432e+08	5.68574e+07	4.1742e+07	9.50343e+07	6.08592e+07	4.01601e+07	8.14875e+07	3.43784e+07	4.80433e+07	1.12241e+08	1.13641e+08	5.67315e+07	1.14397e+08	9.57345e+07	6.72755e+07	6.74872e+07	6.72825e+07	5.21393e+07	2.56737e+08	4.32904e+07	3.85125e+07
M303T838_2	Arachidonic acid	303.239	837.9	304.24	19.1268	C20H32O2	[M-H]-	Fatty Acyls	Fatty acids and conjugates	C00219	Circulatory system; Cell growth and death; Nervous system; Sensory system; Endocrine system; Lipid metabolism; Structure-based classification; Immune system; Infectious disease: parasitic; Global and overview maps	506-32-1	HMDB0001043	BioDeepDB	2	neg	3.53702e+07	2.57762e+07	5.44885e+07	4.16641e+07	1.30753e+07	1.97984e+07	3.30566e+07	2.8549e+07	4.06193e+07	5.92987e+07	3.0781e+07	8.9647e+07	3.72154e+07	9.31019e+07	3.213e+07	1.37063e+08	1.12682e+08	1.8333e+08	2.03397e+08	3.49887e+08	2.84812e+08	3.05459e+08	4.06402e+07	5.56603e+07
M105T82	Glyceric acid	105.019	81.7	106.027	0.228529	C3H6O4	[M-H]-	Organooxygen compounds	Carbohydrates and carbohydrate conjugates	C00258	Carbohydrate metabolism; Lipid metabolism; Amino acid metabolism; Energy metabolism; Global and overview maps	473-81-4	HMDB0000139	BioDeepDB	2	neg	5.66096e+07	1.19805e+07	2.82148e+07	2.69485e+07	1.22551e+07	8.07828e+07	1.13454e+08	8.88706e+07	2.00605e+07	8.79965e+07	4.57508e+07	4.17798e+07	2.45434e+07	2.34501e+07	5.37809e+07	5.33218e+07	6.24182e+07	3.1849e+07	6.18092e+07	1.48775e+07	4.74422e+07	4.73638e+07	5.0513e+07	4.03105e+07
M117T122	Succinic acid	117.056	121.6	118.027	9.56919	C4H6O4	[M-H]-	Carboxylic acids and derivatives	Dicarboxylic acids and derivatives	C00042	Cancer: overview; Metabolism of cofactors and vitamins; Chemical structure transformation maps; Signal transduction; Nervous system; Endocrine system; Carbohydrate metabolism; Xenobiotics biodegradation and metabolism; Amino acid metabolism; Energy metabolism; Global and overview maps	110-15-6	HMDB0000254	BioDeepDB	2	neg	1.5909e+07	4.006e+06	1.14239e+07	9.64303e+06	1.11501e+07	913180	3.32575e+06	2.27122e+06	1.47867e+07	3.11379e+07	2.75772e+06	3.26057e+06	1.27493e+06	1.65594e+07	1.46189e+07	1.28324e+07	1.12173e+07	1.8114e+07	1.36303e+07	1.76141e+06	1.62315e+06	3.11912e+06	1.91082e+07	1.26843e+07
M145T126	Oxoglutaric acid	145.062	125.9	146.022	2.51139	C5H6O5	[M-H]-	Keto acids and derivatives	Gamma-keto acids and derivatives	C00026	Cancer: overview; Metabolism of other amino acids; Signal transduction; Nervous system; Endocrine system; Excretory system; Carbohydrate metabolism; Digestive system; Xenobiotics biodegradation and metabolism; Amino acid metabolism; Chemical structure transformation maps; Global and overview maps	328-50-7 / 64-15-3	HMDB0000208	BioDeepDB	2	neg	1.19788e+06	4.79908e+06	627348	5.42977e+06	1.90592e+06	3.58229e+06	562280	4.4209e+06	1.5515e+06	610433	1.41734e+06	555967	3.56541e+06	5.27585e+06	2.55105e+06	1.65089e+06	1.61473e+06	1.31193e+06	510701	1.80484e+07	450483	508394	3.66731e+06	1.16612e+06
M140T80	O-Phosphoethanolamine	140.012	80.1	141.019	0.171414	C2H8NO4P	[M-H]-	Organic phosphoric acids and derivatives	Phosphate esters	C00346	Lipid metabolism; Signal transduction; Global and overview maps; Drug resistance: antimicrobial	1071-23-4	HMDB0000224	BioDeepDB	2	neg	2.6631e+07	3.31444e+07	2.42059e+07	3.31598e+07	2.30535e+07	3.49831e+07	2.88353e+07	3.57805e+07	1.58114e+07	2.53417e+07	1.87225e+07	8.15502e+06	3.05429e+07	3.466e+07	2.28687e+07	1.40197e+07	1.11365e+07	2.34175e+07	3.055e+07	2.75407e+07	1.78931e+07	9.89697e+06	2.67387e+07	2.6469e+07
M133T80	L-Aspartic acid	133.034	80.3	133.037	7.90184	C4H7NO4	[M]-	Carboxylic acids and derivatives	Amino acids, peptides, and analogues	C00049	Metabolism of cofactors and vitamins; Metabolism of other amino acids; Chemical structure transformation maps; Membrane transport; Signal transduction; Biosynthesis of other secondary metabolites; Signaling molecules and interaction; Translation; Amino acid metabolism; Energy metabolism; Cell motility; Global and overview maps	56-84-8	HMDB0000191	BioDeepDB	2	neg	2.3298e+07	2.66467e+07	3.31671e+07	2.21338e+07	2.14422e+07	2.63443e+07	2.84331e+07	2.53795e+07	3.11339e+07	4.04734e+07	3.5977e+07	4.41826e+07	1.66739e+07	2.9448e+07	1.70464e+07	3.2585e+07	2.89614e+07	2.98091e+07	1.91362e+07	2.99566e+07	3.85321e+07	3.88886e+07	4.57996e+07	8.04913e+07
M102T80	Dimethylglycine	102.056	80.5	103.063	0.235165	C4H9NO2	[M-H]-	Carboxylic acids and derivatives	Amino acids, peptides, and analogues	C01026	Amino acid metabolism; Global and overview maps	1118-68-9	HMDB0000092	BioDeepDB	2	neg	2.85254e+07	3.30253e+07	3.00157e+07	3.15904e+07	2.98823e+07	3.16531e+07	3.67143e+07	3.6117e+07	2.88258e+07	3.34221e+07	3.00132e+07	2.94908e+07	3.37341e+07	3.47516e+07	2.89602e+07	3.25653e+07	3.0213e+07	2.97661e+07	2.95859e+07	3.02527e+07	3.22576e+07	3.51658e+07	2.97494e+07	2.89205e+07
M128T90	Pyroglutamic acid	128.035	90.2	129.043	2.48336	C5H7NO3	[M-H]-	Carboxylic acids and derivatives	Amino acids, peptides, and analogues	C01879	Metabolism of other amino acids; Global and overview maps	98-79-3	HMDB0000267	BioDeepDB	2	neg	6.0518e+08	6.40997e+08	5.36022e+08	6.44173e+08	6.01552e+08	4.94634e+08	6.93413e+08	5.45444e+08	6.03536e+08	7.44676e+08	6.85585e+08	5.32798e+08	2.81414e+08	2.02466e+08	2.87851e+08	2.4054e+08	2.04721e+08	2.19852e+08	3.31498e+08	3.18344e+08	2.24223e+08	2.55185e+08	1.93241e+08	2.87818e+08
M147T285	N-Methyl-D-aspartic acid	147.045	285.5	147.053	20.8349	C5H9NO4	[M]-	Carboxylic acids and derivatives	Amino acids, peptides, and analogues	C12269		6384-92-5	HMDB0002393	BioDeepDB	2	neg	8.38972e+06	8.81173e+06	5.62157e+06	8.33772e+06	5.98208e+06	8.57533e+06	7.88501e+06	7.51941e+06	7.64541e+06	1.48287e+07	1.35539e+07	8.68122e+06	7.77373e+06	1.48955e+07	9.73316e+06	1.22726e+07	7.80431e+06	6.67217e+06	6.67809e+06	8.86762e+06	7.99805e+06	9.05475e+06	2.4686e+06	6.02296e+06
M195T82	Gluconic acid	195.051	81.5	196.058	0.635731	C6H12O7	[M-H]-	Organooxygen compounds	Carbohydrates and carbohydrate conjugates	C00257	Carbohydrate metabolism; Global and overview maps	526-95-4	HMDB0000625	BioDeepDB	2	neg	9.71423e+07	9.58299e+07	1.47135e+08	9.52817e+07	9.48157e+07	1.0794e+08	3.62923e+07	1.3005e+08	3.02627e+07	5.98286e+07	6.98061e+07	1.07923e+08	4.1876e+07	1.37646e+08	1.21441e+08	3.96229e+07	3.22602e+07	1.2691e+08	3.65869e+07	3.5337e+07	6.81053e+07	1.01784e+08	9.2016e+07	1.51003e+08
M206T384	N-Acetyl-L-phenylalanine	206.082	384	207.089	1.08695	C11H13NO3	[M-H]-	Carboxylic acids and derivatives	Amino acids, peptides, and analogues	C03519	Amino acid metabolism; Global and overview maps	2018-61-3	HMDB0000512	BioDeepDB	2	neg	2.58452e+06	7.27786e+06	1.21739e+06	1.17625e+06	294284	116269	229668	610602	436520	4.94766e+06	5.85884e+06	566201	317490	111390	1.71563e+06	55341	2.51898e+06	40477.2	435354	892261	906349	1.01571e+06	905368	1114.82
M116T91	Fumaric acid	116.035	90.6	116.011	29.4009	C4H4O4	[M]-	Carboxylic acids and derivatives	Dicarboxylic acids and derivatives	C00122	Cancer: overview; Metabolism of cofactors and vitamins; Chemical structure transformation maps; Signal transduction; Endocrine system; Carbohydrate metabolism; Xenobiotics biodegradation and metabolism; Amino acid metabolism; Energy metabolism; Global and overview maps	110-17-8	HMDB0000134	BioDeepDB	2	neg	1.00383e+07	1.52516e+07	4.58499e+06	3.3231e+06	3.93312e+06	2.39459e+06	7.70926e+06	3.41189e+06	3.26403e+06	4.7895e+06	4.15519e+06	3.8824e+06	5.71941e+06	4.54342e+06	4.93742e+06	5.5074e+06	3.42117e+06	3.44243e+06	4.88316e+06	5.07869e+06	5.58817e+06	5.09636e+06	6.34887e+06	7.10602e+06
M267T790	Formononetin	267.196	790.2	268.074	17.6299	C16H12O4	[M-H]-	Isoflavonoids	O-methylated isoflavonoids	C00858	Chemical structure transformation maps; Biosynthesis of other secondary metabolites; Global and overview maps	485-72-3	HMDB0005808	BioDeepDB	2	neg	1.41511e+08	2.72634e+08	9.38943e+07	3.2244e+08	1.75685e+08	1.02973e+08	9.95501e+07	3.95726e+07	7.3786e+07	8.79377e+07	5.81898e+07	4.12686e+07	7.69535e+07	8.48894e+07	4.99047e+07	5.32333e+07	2.72034e+07	8.99634e+07	5.32086e+07	4.52088e+07	2.33469e+07	3.72352e+07	7.03398e+07	2.3512e+07
M192T373	Phenylacetylglycine	192.067	372.5	193.074	0.124957	C10H11NO3	[M-H]-	Carboxylic acids and derivatives	Amino acids, peptides, and analogues	C05598	Amino acid metabolism	500-98-1	HMDB0000821	BioDeepDB	2	neg	1.13868e+07	7.48033e+06	9.60756e+06	9.39961e+06	8.46149e+06	6.291e+06	7.40274e+06	6.93087e+06	1.07618e+07	1.13816e+07	9.73856e+06	1.01058e+07	8.78296e+06	9.98478e+06	1.30735e+07	7.52481e+06	9.92236e+06	8.51919e+06	1.10125e+07	7.34657e+06	7.59215e+06	9.57074e+06	6.67838e+06	8.80308e+06
M218T151	Pantothenic acid	218.104	151	219.111	0.806956	C9H17NO5	[M-H]-	Alcohols and polyols	Polyols	C00864	Metabolism of cofactors and vitamins; Metabolism of other amino acids; Global and overview maps; Digestive system	79-83-4 / 20938-62-9 / 137-08-6	HMDB0000210	BioDeepDB	2	neg	2.79091e+07	1.19968e+07	1.98461e+07	3.45686e+07	3.4099e+07	2.50711e+07	3.06745e+07	4.17601e+07	3.92676e+07	2.65612e+07	3.62836e+07	4.71229e+07	2.87758e+08	2.46004e+08	2.10212e+08	4.35918e+08	3.93058e+08	4.61863e+08	3.80413e+08	4.28966e+08	3.80954e+08	3.59679e+08	2.23797e+08	2.67142e+08
M114T117	Dihydrouracil	113.989	117	114.043	11.593	C4H6N2O2	[M]-	Diazines	Pyrimidines and pyrimidine derivatives	C00429	Metabolism of cofactors and vitamins; Metabolism of other amino acids; Global and overview maps; Nucleotide metabolism	504-07-4	HMDB0000076	BioDeepDB	2	neg	3.63217e+06	3.77792e+06	1.46735e+06	790285	1.24931e+06	1.40206e+06	2.78601e+06	3.50048e+06	1.45873e+06	3.07559e+06	2.82076e+06	506640	1.86304e+06	2.90787e+06	2.70263e+06	1.38903e+06	1.31119e+06	1.37434e+06	3.81016e+06	1.63266e+06	4.02469e+06	2.39822e+06	1.50053e+06	1.43329e+06
M145T87	L-Glutamine	145.062	87	146.069	1.21327	C5H10N2O3	[M-H]-	Carboxylic acids and derivatives	Amino acids, peptides, and analogues	C00064	Cancer: overview; Metabolism of cofactors and vitamins; Chemical structure transformation maps; Membrane transport; Nervous system; Excretory system; Digestive system; Carbohydrate metabolism; Nucleotide metabolism; Translation; Amino acid metabolism; Energy metabolism; Global and overview maps	56-85-9	HMDB0000641	BioDeepDB	2	neg	6.32279e+08	2.82197e+08	6.83146e+09	3.31205e+08	1.79029e+08	3.75987e+08	5.84157e+09	1.00346e+10	1.14703e+10	8.08015e+08	2.74836e+08	6.0848e+08	4.91999e+08	5.31016e+08	8.54373e+08	5.57094e+08	8.67976e+08	5.72998e+08	2.60486e+09	5.55594e+08	2.4645e+09	5.10074e+08	6.46855e+08	6.04168e+08
M353T620	Prostaglandin F2a	353.233	619.6	354.241	0.0238965	C20H34O5	[M-H]-	Fatty Acyls	Eicosanoids	C00639	Nervous system; Signal transduction; Digestive system; Endocrine system; Lipid metabolism; Signaling molecules and interaction; Global and overview maps	551-11-1	HMDB0001139	BioDeepDB	2	neg	1.72506e+07	8.59408e+06	1.05841e+07	1.2425e+07	7.79633e+06	8.01876e+06	1.36773e+07	4.39807e+06	4.74435e+06	7.86575e+06	4.83067e+06	1.55606e+07	1.94269e+07	4.8186e+06	9.65553e+06	4.03547e+06	4.10991e+06	8.60352e+06	1.20444e+07	1.06047e+07	1.16574e+07	1.26398e+07	5.94972e+06	3.24076e+06
M375T446_1	Riboflavin	375.129	446.3	376.138	6.22	C17H20N4O6	[M-H]-	Pteridines and derivatives	Alloxazines and isoalloxazines	C00255	Metabolism of cofactors and vitamins; Global and overview maps; Membrane transport; Digestive system	83-88-5	HMDB0000244	BioDeepDB	2	neg	1.71463e+06	1.68599e+06	1.49471e+06	1.94118e+06	1.66318e+06	1.61432e+06	1.82964e+06	1.91604e+06	2.77679e+06	1.30997e+06	1.70232e+06	2.60268e+06	1.34097e+06	1.94503e+06	1.33826e+06	1.25729e+06	1.4473e+06	1.58411e+06	1.6189e+06	1.13255e+06	1.78074e+06	2.11947e+06	1.02658e+06	997584
M130T95	Creatine	130.062	94.7	131.07	0.584335	C4H9N3O2	[M-H]-	Carboxylic acids and derivatives	Amino acids, peptides, and analogues	C00300	Amino acid metabolism; Global and overview maps	57-00-1	HMDB0000064	BioDeepDB	2	neg	7.35312e+08	6.84424e+08	2.80783e+08	6.93713e+08	8.40168e+08	5.14968e+08	5.85893e+08	5.53503e+08	1.08903e+09	6.4281e+08	8.93353e+08	9.88955e+08	8.49433e+08	8.18784e+08	7.14778e+08	8.70642e+08	6.76839e+08	7.86018e+08	6.01109e+08	6.34243e+08	7.4099e+08	6.39755e+08	6.76236e+08	7.01387e+08
M397T806	Daidzin	397.224	805.8	416.111	6.47381	C21H20O9	[M-H2O-H]-	Isoflavonoids	Isoflavonoid O-glycosides	C10216	Biosynthesis of other secondary metabolites	552-66-9	HMDB0033991	BioDeepDB	2	neg	1.4661e+06	1.14579e+06	848639	1.90527e+06	2.62478e+06	1.44451e+06	1.2124e+06	338658	2.14776e+06	1.37332e+07	7.17883e+06	1.874e+06	1.12744e+07	2.74601e+07	3.28505e+06	2.02308e+07	1.2861e+07	8.33881e+06	8.40179e+06	5.27065e+06	2.17561e+07	1.45848e+07	8.81763e+06	7.40477e+06
M157T753	Pelargonic acid	157.123	753.5	158.131	0.152746	C9H18O2	[M-H]-	Fatty Acyls	Fatty acids and conjugates	C01601		112-05-0	HMDB0000847	BioDeepDB	2	neg	3.11894e+06	6.1756e+06	4.75264e+06	1.19425e+07	3.65246e+06	6.81016e+06	6.75089e+06	5.75729e+06	113639	7.13783e+06	6.40732e+06	1.75291e+07	9.69196e+06	1.36104e+07	1.09406e+07	1.64441e+07	2.02289e+07	2.57651e+07	132315	3.50785e+07	1.10149e+07	1.09267e+07	1.60233e+07	6.98077e+06
M159T128	Oxoadipic acid	158.978	128.1	160.037	7.82026	C6H8O5	[M-H]-	Keto acids and derivatives	Medium-chain keto acids and derivatives	C00322	Energy metabolism; Amino acid metabolism; Global and overview maps	3184-35-8	HMDB0000225	BioDeepDB	2	neg	1.06685e+06	1.06198e+06	1.18815e+06	961835	883809	563921	1.18244e+06	958521	1.12193e+06	901512	1.05895e+06	929963	678122	418733	647609	540496	615915	782627	569277	871810	575391	599512	401397	301248
M179T90	D-Mannose	179.056	90.2	180.063	2.36798	C6H12O6	[M-H]-	Organooxygen compounds	Carbohydrates and carbohydrate conjugates	C00159	Membrane transport; Transport and catabolism; Carbohydrate metabolism; Immune system; Global and overview maps	3458-28-4 / 3458-28-4 31103-86-3 / 530-26-7	HMDB0000169	BioDeepDB	2	neg	6.08455e+07	6.57142e+07	5.65319e+07	3.51404e+07	7.55233e+07	6.55166e+07	7.53803e+07	3.41733e+07	5.40362e+07	7.05583e+07	7.57188e+07	4.47441e+07	8.67928e+07	6.48361e+07	4.73227e+07	4.2299e+07	5.42497e+07	2.75391e+07	5.32524e+07	3.89419e+07	5.11755e+07	3.93507e+07	6.83619e+07	5.85361e+07
M255T837	Palmitic acid	255.232	837	256.24	0.922681	C16H32O2	[M-H]-	Fatty Acyls	Fatty acids and conjugates	C00249	Lipid metabolism; Chemical structure transformation maps; Global and overview maps	57-10-3	HMDB0000220	BioDeepDB	2	neg	6.38301e+07	6.67556e+07	7.99399e+07	8.08503e+07	4.48973e+07	5.89511e+07	6.37842e+07	5.34421e+07	5.55676e+07	6.71094e+07	3.78176e+07	6.91987e+07	4.06113e+07	5.14166e+07	6.38874e+07	5.12333e+07	7.46207e+07	5.64727e+07	1.18e+08	1.44329e+08	2.07028e+07	7.25559e+07	6.59262e+07	4.62697e+07
M131T363	Glutaric acid	130.993	362.9	132.042	3.95661	C5H8O4	[M-H]-	Carboxylic acids and derivatives	Dicarboxylic acids and derivatives	C00489	Lipid metabolism; Amino acid metabolism; Global and overview maps	110-94-1	HMDB0000661	BioDeepDB	2	neg	1.19212e+07	1.00048e+07	9.59329e+06	1.02288e+07	9.2931e+06	1.12367e+07	1.27432e+07	8.92928e+06	7.94377e+06	1.40392e+07	1.43665e+07	9.77031e+06	1.17203e+07	1.1224e+07	8.94934e+06	1.16607e+07	9.14479e+06	1.07589e+07	8.58773e+06	9.4239e+06	8.98989e+06	9.00444e+06	8.61004e+06	8.62662e+06
M221T826	N-Acetyl-D-glucosamine	221.154	826.1	221.09	0.462628	C8H15NO6	[M]-	Organooxygen compounds	Carbohydrates and carbohydrate conjugates	C00140	Carbohydrate metabolism; Membrane transport; Global and overview maps	7512-17-6	HMDB0000215	BioDeepDB	2	neg	7.55691e+06	1.83853e+06	6.76065e+06	1.69074e+06	2.42314e+06	3.96131e+06	6.86948e+06	7.49947e+06	5.9003e+06	2.28878e+06	8.32813e+06	8.01013e+06	7.61314e+06	1.84502e+06	4.68869e+06	2.38134e+06	7.06479e+06	7.93591e+06	2.70885e+06	9.02547e+06	6.44503e+06	7.88146e+06	5.299e+06	764513
M103T93	Malonate	103.004	92.7	104.011	0.233001	C3H4O4	[M-H]-			C00383	Lipid metabolism; Metabolism of other amino acids; Global and overview maps; Nucleotide metabolism	141-82-2 / 156-80-9		BioDeepDB	2	neg	2.19518e+06	2.52416e+06	2.3414e+06	2.40015e+06	2.312e+06	516273	2.35585e+06	2.52485e+06	2.21857e+06	2.49448e+06	2.4416e+06	2.22351e+06	2.04626e+06	1.72825e+06	2.09563e+06	2.33212e+06	2.36424e+06	2.41339e+06	2.41133e+06	2.2084e+06	2.54443e+06	2.54443e+06	2.44781e+06	1.73246e+06
M225T93	Carnosine	225.099	93.3	226.107	0.990423	C9H14N4O3	[M-H]-	Peptidomimetics	Hybrid peptides	C00386	Amino acid metabolism; Metabolism of other amino acids; Global and overview maps	305-84-0	HMDB0000033	BioDeepDB	2	neg	5.65385e+07	7.4833e+07	6.22766e+07	9.05876e+07	4.68142e+07	3.96972e+07	6.96133e+07	9.87705e+07	3.68516e+07	6.75626e+07	8.97604e+07	4.65374e+07	3.60726e+07	6.19125e+07	6.38482e+07	6.4607e+07	6.3677e+07	2.74848e+07	6.15717e+07	6.22316e+07	6.02484e+07	6.19935e+07	5.91341e+07	5.63423e+07
M137T94	Urocanic acid	137.036	93.5	138.043	0.904875	C6H6N2O2	[M-H]-	Azoles	Imidazoles	C00785	Amino acid metabolism; Global and overview maps	104-98-3	HMDB0000301	BioDeepDB	2	neg	2.94803e+06	3.1569e+06	3.6917e+06	3.8514e+06	3.64184e+06	2.95009e+06	3.84028e+06	3.15525e+06	5.36469e+06	6.92925e+06	5.04927e+06	4.01403e+06	6.4375e+06	5.85953e+06	6.60081e+06	6.46183e+06	9.45211e+06	8.24182e+06	9.05429e+06	8.49095e+06	9.93269e+06	1.04215e+07	9.78259e+06	7.15985e+06
M188T352	Kynurenic acid	188.035	351.8	189.043	1.72308	C10H7NO3	[M-H]-	Quinolines and derivatives	Quinoline carboxylic acids	C01717	Amino acid metabolism; Global and overview maps	492-27-3	HMDB0000715	BioDeepDB	2	neg	1.15632e+06	994533	1.46992e+06	1.38551e+06	937202	1.07914e+06	1.14389e+06	1.43714e+06	32800.4	407816	4.10237e+06	78146.9	944450	120306	97985.1	1.16653e+06	203857	975982	98859.5	1.02189e+06	1.57122e+06	179918	170554	96712.6
M113T117	Creatinine	112.986	117	113.059	10.572	C4H7N3O	[M]-	Carboxylic acids and derivatives	Amino acids, peptides, and analogues	C00791	Amino acid metabolism; Global and overview maps	60-27-5	HMDB0000562	BioDeepDB	2	neg	1.09158e+08	1.15338e+08	1.12259e+08	1.04642e+08	9.55394e+07	1.02688e+08	1.02865e+08	9.62405e+07	9.09423e+07	1.05831e+08	1.08921e+08	8.50277e+07	1.13089e+08	1.30252e+08	1.17035e+08	1.32471e+08	1.09708e+08	1.04076e+08	1.00544e+08	8.88985e+07	7.23064e+07	1.15107e+08	6.39274e+07	6.92932e+07
M114T96	L-Proline	114.056	96.3	115.063	1.08719	C5H9NO2	[M-H]-	Carboxylic acids and derivatives	Amino acids, peptides, and analogues	C00148	Cancer: overview; Membrane transport; Digestive system; Biosynthesis of other secondary metabolites; Translation; Amino acid metabolism; Global and overview maps	147-85-3	HMDB0000162	BioDeepDB	2	neg	5.34606e+06	5.52136e+06	6.1253e+06	6.32065e+06	5.88998e+06	5.1052e+06	5.82861e+06	5.60479e+06	8.7876e+06	1.084e+07	8.96802e+06	6.34545e+06	9.66544e+06	1.15745e+07	8.99944e+06	8.89871e+06	1.42936e+07	1.19352e+07	1.60479e+07	1.38988e+07	1.59443e+07	1.5393e+07	1.40519e+07	9.97538e+06
M180T99	Caffeate	180.034	98.9	180.042	20.7556	C9H8O4	[M]-			C01197	Chemical structure transformation maps; Biosynthesis of other secondary metabolites; Global and overview maps	501-16-6 / 331-39-5		BioDeepDB	2	neg	6.40109e+07	1.73408e+07	7.47714e+07	3.03734e+07	2.06942e+08	6.49992e+07	1.34024e+08	6.71063e+07	9.7511e+07	8.02939e+07	8.64732e+07	8.74235e+07	7.56525e+07	8.0934e+07	3.95087e+07	1.12061e+08	1.2245e+08	1.23511e+08	6.51097e+07	1.06089e+08	9.73381e+07	9.54927e+07	1.58021e+08	5.95375e+07
M172T346	N-Acetylleucine	172.098	346.2	173.105	0.720521	C8H15NO3	[M-H]-	Carboxylic acids and derivatives	Amino acids, peptides, and analogues	C02710		1188-21-2	HMDB0011756	BioDeepDB	2	neg	1.56615e+06	2.06088e+06	2.6688e+06	2.89941e+06	1.79914e+06	839703	1.49276e+06	1.94428e+06	1.69983e+06	2.50985e+06	2.65171e+06	3.14407e+06	2.04911e+06	1.82069e+06	1.20484e+06	1.88048e+06	1.75558e+06	1.17039e+06	1.02673e+06	2.16817e+06	1.17904e+06	1.88054e+06	536091	1.04383e+06
M180T122_2	L-Tyrosine	180.067	121.9	181.074	0.133284	C9H11NO3	[M-H]-	Carboxylic acids and derivatives	Amino acids, peptides, and analogues	C00082	Cancer: overview; Metabolism of cofactors and vitamins; Metabolism of other amino acids; Chemical structure transformation maps; Nervous system; Endocrine system; Digestive system; Neurodegenerative disease; Biosynthesis of other secondary metabolites; Translation; Metabolism of terpenoids and polyketides; Amino acid metabolism; Substance dependence; Energy metabolism; Global and overview maps	60-18-4	HMDB0000158	BioDeepDB	2	neg	9.22086e+07	6.34252e+07	1.06662e+08	6.4225e+07	1.03132e+08	6.09513e+07	1.26514e+08	8.85632e+07	1.41148e+08	1.32673e+08	1.86844e+08	1.13798e+08	1.5285e+08	1.0335e+08	1.76939e+08	1.09999e+08	1.76586e+08	1.50895e+08	1.91791e+08	1.54412e+08	1.49919e+08	1.46017e+08	8.33653e+07	1.20867e+08
M665T105_2	Maltotetraose	665.219	104.7	666.222	6.72861	C24H42O21	[M-H]-	Organooxygen compounds	Carbohydrates and carbohydrate conjugates	C02052		34612-38-9	HMDB0001296	BioDeepDB	2	neg	1.23773e+06	1.72714e+06	1.91725e+06	1.52948e+06	1.31912e+06	1.80551e+06	1.38841e+06	1.44075e+06	1.88816e+06	1.65262e+06	1.9576e+06	1.49221e+06	1.79519e+06	1.52484e+06	1.39098e+06	1.59814e+06	1.46402e+06	1.04267e+06	1.36e+06	1.54489e+06	1.19453e+06	1.57452e+06	1.55023e+06	1.54942e+06
M203T363	L-Tryptophan	203.082	362.9	204.09	1.59541	C11H12N2O2	[M-H]-	Indoles and derivatives	Indolyl carboxylic acids and derivatives	C00078	Cancer: overview; Nervous system; Digestive system; Development and regeneration; Biosynthesis of other secondary metabolites; Translation; Amino acid metabolism; Chemical structure transformation maps; Infectious disease: parasitic; Global and overview maps	73-22-3	HMDB0000929	BioDeepDB	2	neg	1.16332e+08	1.75548e+08	2.17774e+08	1.93919e+08	2.0526e+08	1.2002e+08	8.25429e+07	1.94591e+08	1.71954e+08	1.58296e+08	3.2792e+07	1.33916e+08	1.07798e+08	1.92273e+08	1.35868e+08	1.76872e+08	8.08397e+07	1.32767e+08	1.3895e+08	1.5992e+07	9.45835e+07	1.29125e+08	1.40392e+08	1.52569e+08
M121T108	Erythritol	121.03	107.5	122.058	9.82483	C4H10O4	[M-H]-			C00503	Membrane transport	149-32-6		BioDeepDB	2	neg	989716	1.16458e+06	1.06772e+06	1.17899e+06	1.05088e+06	1.20185e+06	2.63872e+06	1.04482e+06	1.08644e+06	1.4132e+06	1.28049e+06	1.1431e+06	1.24091e+06	1.13966e+06	1.31132e+06	1.15912e+06	1.30111e+06	1.12169e+06	1.29873e+06	1.19484e+06	1.18034e+06	1.12748e+06	1.07196e+06	1.18897e+06
M116T696	L-Valine	116.071	696.5	117.079	4.36022	C5H11NO2	[M-H]-	Carboxylic acids and derivatives	Amino acids, peptides, and analogues	C00183	Cancer: overview; Metabolism of cofactors and vitamins; Metabolism of other amino acids; Membrane transport; Digestive system; Biosynthesis of other secondary metabolites; Translation; Amino acid metabolism; Chemical structure transformation maps; Global and overview maps	72-18-4	HMDB0000883	BioDeepDB	2	neg	4.93451e+06	3.89858e+06	3.11572e+06	3.93243e+06	4.85759e+06	2.95402e+06	4.85417e+06	3.40709e+06	4.03805e+06	4.67415e+06	5.57558e+06	5.1173e+06	1.99707e+06	1.72543e+06	2.31155e+06	1.33528e+06	2.2752e+06	2.66339e+06	1.98908e+06	2.07231e+06	2.00713e+06	2.10853e+06	779820	1.3729e+06
M383T304_2	S-Adenosylhomocysteine	383.113	304.2	384.122	1.57543	C14H20N6O5S	[M-H]-	5'-deoxyribonucleosides	5'-deoxy-5'-thionucleosides	C00021	Amino acid metabolism; Global and overview maps	979-92-0	HMDB0000939	BioDeepDB	2	neg	1.46164e+07	1.4941e+07	1.20333e+07	9.1785e+06	1.29804e+07	1.11456e+07	1.25375e+07	9.12491e+06	8.40041e+06	6.18998e+06	8.64536e+06	8.51594e+06	1.06561e+07	1.01755e+07	1.06673e+07	1.59365e+07	1.19847e+07	1.69017e+07	1.13182e+07	7.95219e+06	1.05435e+07	1.00483e+07	6.85952e+06	1.29457e+07
M346T120	dGMP	346.055	120.2	347.063	1.29136	C10H14N5O7P	[M-H]-	Purine nucleotides	Purine deoxyribonucleotides	C00362	Global and overview maps; Nucleotide metabolism	902-04-5	HMDB0001044	BioDeepDB	2	neg	2.72156e+08	2.47124e+08	2.55046e+08	2.72635e+08	2.45784e+08	1.7886e+08	2.90869e+08	2.83035e+08	1.86384e+08	2.42095e+08	2.67593e+08	1.69883e+08	1.32501e+08	1.17346e+08	7.87493e+07	1.39566e+08	9.43854e+07	1.61032e+08	8.99932e+07	1.62256e+08	3.01117e+07	1.51692e+08	1.04851e+08	2.60977e+07
M223T742	Thymidine	223.028	742.4	242.09	1.37927	C10H14N2O5	[M-H2O-H]-	Pyrimidine nucleosides	Pyrimidine 2'-deoxyribonucleosides	C00214	Global and overview maps; Nucleotide metabolism	50-89-5	HMDB0000273	BioDeepDB	2	neg	1.01143e+06	1.53974e+06	1.22726e+06	3.84963e+06	1.60277e+06	1.10747e+06	1.46269e+06	2.1265e+06	4.9424e+06	6.9094e+06	2.0201e+06	9.77654e+06	4.16794e+06	4.01311e+06	2.33917e+06	7.46592e+06	3.46347e+06	9.78617e+06	6.28767e+06	6.75175e+06	4.15456e+06	7.66088e+06	3.52427e+06	5.20811e+06
M130T125	Leucine	130.087	124.7	131.095	0.584223	C6H13NO2	[M-H]-	Carboxylic acids and derivatives	Amino acids, peptides, and analogues	C16439		328-39-2	HMDB0062203	BioDeepDB	2	neg	2.63209e+08	2.67561e+08	2.22641e+08	3.1328e+08	3.94095e+08	3.35476e+08	2.36723e+08	2.82624e+08	4.23315e+08	5.03851e+08	4.05527e+08	3.6693e+08	1.84956e+08	1.90288e+08	2.77702e+08	2.00337e+08	1.97407e+08	1.82967e+08	1.50178e+08	2.2004e+08	1.46807e+08	1.5662e+08	1.56468e+08	1.53774e+08
M131T216	L-Isoleucine	131.072	216.1	131.095	9.88732	C6H13NO2	[M]-	Carboxylic acids and derivatives	Amino acids, peptides, and analogues	C00407	Cancer: overview; Metabolism of other amino acids; Digestive system; Biosynthesis of other secondary metabolites; Infectious disease: bacterial; Translation; Amino acid metabolism; Chemical structure transformation maps; Global and overview maps	73-32-5	HMDB0000172	BioDeepDB	2	neg	904912	1.47522e+06	976783	923250	1.73468e+06	1.55914e+06	170383	1.58428e+06	2.81451e+06	1.56245e+06	2.75914e+06	1.15131e+06	765044	1.39559e+06	702961	1.07855e+06	717272	1.43159e+06	890932	982979	940238	1.43736e+06	1.05099e+06	1.67306e+06
M191T766	5-Hydroxyindoleacetic acid	191.108	765.6	191.058	5.77417	C10H9NO3	[M]-	Indoles and derivatives	Indolyl carboxylic acids and derivatives	C05635	Amino acid metabolism; Nervous system; Global and overview maps	54-16-0	HMDB0000763	BioDeepDB	2	neg	4.84501e+06	3.80563e+06	3.58455e+06	2.74004e+06	5.52797e+06	2.94341e+06	3.02842e+06	4.23661e+06	2.44203e+06	4.12733e+06	1.09696e+06	1.10869e+06	4.34261e+06	2.88505e+06	2.92366e+06	3.49297e+06	1.46958e+06	2.0117e+06	3.30647e+06	4.05746e+06	2.74774e+06	3.63081e+06	1.07996e+06	2.46678e+06
M164T285	D-Phenylalanine	164.072	285.5	165.079	1.0727	C9H11NO2	[M-H]-			C02265	Amino acid metabolism; Sensory system; Global and overview maps	673-06-3		BioDeepDB	2	neg	9.65124e+07	4.716e+07	3.91171e+08	1.29214e+08	2.08714e+08	1.59508e+08	1.59825e+08	1.54447e+08	1.77496e+08	8.5178e+08	2.61849e+08	7.01589e+08	3.6776e+08	2.93292e+08	2.48341e+08	2.85173e+08	1.37721e+08	2.39482e+08	1.94068e+08	2.96748e+08	1.59651e+08	2.22624e+08	6.20045e+08	3.91435e+08
M178T334	Hippuric acid	178.051	333.9	179.058	0.134793	C9H9NO3	[M-H]-	Benzene and substituted derivatives	Benzoic acids and derivatives	C01586	Amino acid metabolism; Global and overview maps	495-69-2	HMDB0000714	BioDeepDB	2	neg	3.37008e+06	1.55735e+06	3.18702e+06	2.80409e+06	3.39248e+06	1.09754e+06	423143	3.37599e+06	3.07842e+06	3.76059e+06	2.94864e+06	4.15765e+06	1.94873e+06	2.75873e+06	2.55547e+06	211349	2.09228e+06	2.11201e+06	1.3819e+06	2.94542e+06	3.17297e+06	3.30405e+06	4.62112e+06	3.78522e+06
M269T797	Dehydroepiandrosterone	269.212	796.6	288.209	1.88004	C19H28O2	[M-H2O-H]-	Steroids and steroid derivatives	Androstane steroids	C01227	Cancer: overview; Endocrine system; Lipid metabolism; Xenobiotics biodegradation and metabolism; Cancer: specific types; Global and overview maps	53-43-0	HMDB0000077	BioDeepDB	2	neg	1.50889e+07	3.70714e+07	4.83167e+07	6.59764e+07	2.20903e+07	3.09596e+07	2.67224e+07	6.93265e+07	2.93615e+07	5.85551e+07	4.10431e+07	8.03287e+07	9.69006e+07	3.43214e+07	2.14221e+07	7.7944e+07	3.7203e+07	3.78497e+07	7.91675e+07	1.2511e+08	8.47596e+07	8.94356e+07	6.49067e+07	1.44556e+08
M241T614	1-Hexadecanol	241.038	613.8	242.261	0.0901188	C16H34O	[M-H]-	Fatty Acyls	Fatty alcohols	C00823	Lipid metabolism	36653-82-4	HMDB0003424	BioDeepDB	2	neg	789468	1.15875e+06	1.12846e+06	623765	844183	892208	1.07973e+06	1.45083e+06	603853	836497	521787	958952	2.1886e+06	1.86771e+06	1.12035e+06	2.08977e+06	2.36964e+06	1.25238e+06	1.63594e+06	2.18207e+06	2.82227e+06	3.01318e+06	3.0614e+06	1.40589e+06
M271T823	17a-Estradiol	271.227	823.3	272.178	1.75116	C18H24O2	[M-H]-	Steroids and steroid derivatives	Estrane steroids	C02537	Lipid metabolism	57-91-0	HMDB0000429	BioDeepDB	2	neg	1.79225e+07	1.6487e+07	2.98991e+07	3.28772e+07	1.02786e+07	6.20794e+06	1.32695e+07	1.45274e+07	2.95267e+07	2.15116e+07	3.08211e+07	1.19578e+07	2.34023e+07	2.65371e+07	2.17453e+07	1.93909e+07	3.50358e+07	2.73318e+07	2.96491e+07	3.1973e+07	3.01012e+07	3.37103e+07	1.47104e+07	1.88484e+07
M121T494	Phenylethylamine	121.029	493.6	121.089	9.3494	C8H11N	[M]-	Benzene and substituted derivatives	Phenethylamines	C05332	Amino acid metabolism; Global and overview maps	64-04-0	HMDB0012275	BioDeepDB	2	neg	9.8499e+06	1.09125e+08	4.97002e+07	1.27441e+08	1.3748e+07	1.39718e+07	2.12735e+07	1.05341e+08	1.58922e+07	7.9757e+07	1.29793e+08	1.80574e+07	1.25228e+07	6.3295e+06	5.25355e+07	1.69945e+07	6.78894e+06	1.71777e+07	1.76405e+07	1.9519e+07	1.69633e+07	1.25512e+07	8.00995e+06	5.87472e+06
M407T701	Allocholic acid	407.28	701.5	408.288	1.41397	C24H40O5	[M-H]-	Steroids and steroid derivatives	Bile acids, alcohols and derivatives	C00695	Lipid metabolism; Global and overview maps; Digestive system	2464-18-8 / 81-25-4	HMDB0000505	BioDeepDB	2	neg	1.02596e+06	441905	624460	773601	506756	37919.9	643657	453333	972897	501011	413201	497239	266951	419561	372293	474922	475861	513656	659878	1.16899e+06	432583	471392	44249.3	36135.2
M283T803	Stearic acid	283.264	803.1	284.272	0.514036	C18H36O2	[M-H]-	Fatty Acyls	Fatty acids and conjugates	C01530	Lipid metabolism; Chemical structure transformation maps; Sensory system	57-11-4/646-29-7	HMDB0000827	MoNA	2	neg	1.30352e+08	1.16212e+08	1.62603e+08	6.75183e+06	1.29943e+08	9.3952e+07	1.60137e+08	8.54605e+07	8.14789e+07	3.97707e+06	1.15823e+07	2.55007e+07	7.26593e+07	6.2101e+06	6.76859e+07	1.07095e+08	1.02278e+07	1.46133e+08	6.50744e+07	1.50791e+07	1.12795e+07	1.91389e+07	3.20246e+07	5.89036e+07
M391T800	Chenodeoxycholic acid	391.285	800.5	392.293	0.987947	C24H40O4	[M-H]-	Steroids and steroid derivatives	Bile acids, alcohols and derivatives	C02528	Lipid metabolism; Global and overview maps; Digestive system	474-25-9	HMDB0000518	BioDeepDB	2	neg	4.00058e+06	2.80215e+06	6.94467e+06	2.01826e+06	5.66036e+06	3.38967e+06	5.54116e+06	6.9753e+06	2.83229e+06	805183	4.1685e+06	2.74804e+06	3.90298e+06	2.98735e+06	1.19035e+06	4.71368e+06	3.05825e+06	4.78797e+06	2.16707e+06	3.5952e+06	2.68595e+06	3.40935e+06	2.92413e+06	4.57085e+06
M335T739	12-Keto-tetrahydro-leukotriene B4	335.223	739.2	336.23	0.298309	C20H32O4	[M-H]-	Fatty Acyls	Eicosanoids	C02165	Nervous system; Sensory system; Digestive system; Endocrine system; Lipid metabolism; Signaling molecules and interaction; Structure-based classification; Global and overview maps	71160-24-2	HMDB0002995	BioDeepDB	2	neg	11332.7	45094.9	40940.8	54441.8	324161	24121.7	112165	104119	3.91018e+06	4.92997e+06	1.06135e+06	3.3927e+06	3.07162e+06	1.1165e+07	594721	3.74579e+06	4.11686e+06	6.22956e+06	1.10524e+07	1.28246e+07	2.43575e+07	1.44317e+07	5.1484e+06	6.4637e+06
M241T762	Pentadecanoic acid	241.217	762.1	242.225	2.17232	C15H30O2	[M-H]-	Fatty Acyls	Fatty acids and conjugates	C16537		1002-84-2	HMDB0000826	BioDeepDB	2	neg	1.9107e+07	5.43279e+07	1.69045e+07	9.83203e+07	1.90696e+07	2.80919e+07	2.06207e+07	1.07718e+07	2.02426e+07	2.41395e+07	1.28126e+07	1.88733e+07	7.63195e+06	2.98132e+07	1.66212e+07	1.0003e+07	7.16093e+06	1.15031e+07	7.92911e+06	8.39183e+06	9.05603e+06	1.35774e+07	1.31262e+07	3.08601e+07
M311T784_1	Arachidic acid	311.168	783.8	312.303	1.27261	C20H40O2	[M-H]-	Fatty Acyls	Fatty acids and conjugates	C06425	Lipid metabolism	506-30-9	HMDB0002212	BioDeepDB	2	neg	2.10805e+07	1.07074e+07	6.43401e+07	2.05444e+07	6.24818e+07	9.54407e+06	2.20865e+07	6.17335e+07	9.95439e+07	1.23454e+08	3.68462e+07	1.25168e+08	9.50814e+07	1.71287e+08	6.91172e+07	8.41229e+07	1.0504e+08	8.97748e+07	3.31005e+07	8.53488e+07	1.04405e+08	1.70386e+08	1.48138e+08	1.16552e+08
M271T809	Epiandrosterone	271.227	809.1	290.225	0.998787	C19H30O2	[M-H2O-H]-	Steroids and steroid derivatives	Androstane steroids	C07635	Xenobiotics biodegradation and metabolism; Global and overview maps	481-29-8	HMDB0000365	BioDeepDB	2	neg	1.43195e+06	1.12799e+06	989064	1.07781e+06	895552	1.10463e+06	982048	1.46902e+06	2.62924e+06	2.08228e+06	3.14392e+06	1.91181e+06	1.77572e+06	2.51056e+06	3.4481e+06	2.49283e+06	1.65345e+06	1.88572e+06	1.62489e+06	2.31135e+06	3.29578e+06	1.18377e+06	1.69109e+06	1.77897e+06
M338T824	Erucic acid	338.208	824.4	338.318	1.84306	C22H42O2	[M]-	Fatty Acyls	Fatty acids and conjugates	C08316	Lipid metabolism	112-86-7	HMDB0002068	BioDeepDB	2	neg	81629.2	94417.5	186503	126752	205493	156710	126601	293091	225989	156015	98378.9	290284	218395	247645	159725	117692	124915	209874	253674	199386	266602	162879	70923.1	112428
M437T402_2	FMN	437.091	401.7	456.105	11.1876	C17H21N4O9P	[M-H2O-H]-	Flavin nucleotides		C00061	Metabolism of cofactors and vitamins; Digestive system; Biosynthesis of other secondary metabolites; Metabolism of terpenoids and polyketides; Energy metabolism; Global and overview maps	146-17-8/6184-17-4	HMDB0001520	BioDeepDB	2	neg	3.26684e+06	3.85604e+06	2.93631e+06	5.25608e+06	5.617e+06	8.19749e+06	4.20601e+06	5.71553e+06	5.38353e+06	9.31678e+06	6.35348e+06	9.01691e+06	4.65391e+06	8.17183e+06	1.15955e+07	8.78149e+06	7.30109e+06	6.39136e+06	5.39234e+06	6.14983e+06	5.66582e+06	6.85964e+06	8.56834e+06	9.42156e+06
M362T97	GMP	362.049	96.9	363.058	4.41929	C10H14N5O8P	[M-H]-	Purine nucleotides	Purine ribonucleotides	C00144	Drug resistance: antineoplastic; Signal transduction; Sensory system; Nucleotide metabolism; Chemical structure transformation maps; Global and overview maps	85-32-5	HMDB0001397	BioDeepDB	2	neg	3.99194e+07	3.42107e+07	4.96494e+07	3.13088e+07	4.85876e+07	2.92743e+07	4.51411e+07	3.1763e+07	4.4838e+07	4.6058e+07	4.09438e+07	4.52709e+07	3.8577e+07	4.09997e+07	5.65184e+07	5.42104e+07	5.09804e+07	4.48791e+07	4.42217e+07	3.73424e+07	4.71035e+07	6.80904e+07	3.67676e+07	3.57483e+07
M186T72	(2R)-2-Hydroxy-3-(phosphonatooxy)propanoate	185.989	72.4	185.993	21.5067	C3H7O7P	[M]-	Carbohydrates and carbohydrate conjugates	Sugar acids and derivatives	C00197	Cancer: overview; Chemical structure transformation maps; Endocrine system; Carbohydrate metabolism; Lipid metabolism; Biosynthesis of other secondary metabolites; Amino acid metabolism; Energy metabolism; Global and overview maps	3443-57-0	HMDB0060180	BioDeepDB	2	neg	1.61201e+06	515903	1.75215e+06	1.65747e+06	1.83386e+06	2.13962e+06	1.123e+06	3.49253e+06	2.14573e+06	1.79007e+06	1.64257e+06	2.11859e+06	1.32171e+06	537513	493662	5.90742e+06	5.55202e+06	1.81038e+06	1.72024e+06	2.20474e+06	529764	1.62835e+06	1.23546e+06	531382
M330T76	dAMP	330.058	75.7	331.068	8.18038	C10H14N5O6P	[M-H]-	Purine nucleotides	Purine deoxyribonucleotides	C00360	Global and overview maps; Nucleotide metabolism	653-63-4	HMDB0000905	BioDeepDB	2	neg	1.43564e+07	6.7543e+06	1.22875e+07	1.03038e+07	1.04359e+07	8.93985e+06	1.0579e+07	8.72413e+06	1.05483e+07	1.04413e+07	1.18585e+07	1.02381e+07	1.63618e+07	1.27351e+07	1.66644e+07	1.2491e+07	1.10409e+07	1.5415e+07	1.50908e+07	1.14128e+07	1.38096e+07	1.12214e+07	1.15811e+07	1.27499e+07
M228T212	Lamivudine	228.052	212.4	229.052	29.2741	C8H11N3O3S	[M-H]-	Nucleoside and nucleotide analogues	3'-thia pyrimidine nucleosides	C07065	Digestive system	134678-17-4/NA	HMDB0014847	BioDeepDB	2	neg	1.35159e+06	1.31257e+06	992645	1.62708e+06	1.04029e+06	96346.4	1.20538e+06	1.29702e+06	1.53405e+06	1.12203e+06	1.04141e+06	1.27685e+06	872141	958206	1.24393e+06	192606	888382	967333	465151	1.60473e+06	851415	877616	91002.4	48494.5
M275T74_2	6-Phosphogluconic acid	275.021	73.9	276.025	13.8171	C6H13O10P	[M-H]-	Organooxygen compounds	Carbohydrates and carbohydrate conjugates	C00345	Carbohydrate metabolism; Global and overview maps	921-62-0/53411-70-4	HMDB0001316	BioDeepDB	2	neg	2.3003e+08	3.15718e+07	1.02068e+08	9.65546e+07	1.36801e+08	9.45845e+07	2.3136e+08	1.35589e+08	7.51835e+07	3.75217e+08	8.94768e+07	9.9561e+07	6.09348e+07	3.83827e+08	6.60256e+07	1.40886e+08	4.11309e+07	1.92929e+08	3.19006e+07	1.86764e+08	4.50768e+07	3.48033e+08	3.651e+07	1.23321e+08
M344T76	Thiamine monophosphate	344.075	75.9	345.079	10.3931	C12H18N4O4PS	[M-H]-	Diazines	Pyrimidines and pyrimidine derivatives	C01081	Metabolism of cofactors and vitamins; Global and overview maps	495-23-8/532-40-1	HMDB0002666	BioDeepDB	2	neg	4.18659e+06	2.33341e+06	3.58058e+06	2.47006e+06	2.00225e+06	2.17606e+06	3.85047e+06	4.34998e+06	2.58644e+06	3.53842e+06	4.39781e+06	4.60381e+06	2.96235e+06	3.67811e+06	4.54335e+06	5.52038e+06	3.42177e+06	5.68424e+06	3.99718e+06	4.3436e+06	3.42426e+06	4.49605e+06	2.07012e+06	3.40094e+06
M229T78	D-Ribulose 5-phosphate	229.011	77.7	230.019	2.61996	C5H11O8P	[M-H]-	Carbohydrates and carbohydrate conjugates	Monosaccharides	C00199	Metabolism of cofactors and vitamins; Carbohydrate metabolism; Glycan biosynthesis and metabolism; Energy metabolism; Global and overview maps	4151-19-3/551-85-9	HMDB0000618	BioDeepDB	2	neg	1.75635e+08	1.48525e+08	2.37605e+08	1.31099e+08	1.18774e+08	1.29321e+08	1.40344e+08	1.69927e+08	1.59273e+08	1.49302e+08	1.58255e+08	1.21749e+08	1.85949e+08	1.6574e+08	2.50037e+08	1.92375e+08	2.54658e+08	2.06305e+08	2.88305e+08	2.3739e+08	2.35932e+08	2.76735e+08	2.61387e+08	1.86053e+08
M177T79	Pyrophosphate	176.935	78.7	177.943	2.26071	H4P2O7	[M-H]-	Non-metal oxoanionic compounds	Non-metal pyrophosphates	C00013	Energy metabolism; Neurodegenerative disease	14000-31-8/2466-09-3	HMDB0000250	BioDeepDB	2	neg	5.42901e+08	6.53362e+08	6.87947e+08	6.96183e+08	5.34854e+08	6.07112e+08	4.60961e+08	8.35236e+08	1.01424e+09	1.10899e+09	1.14206e+09	1.25577e+09	7.22482e+08	9.49659e+08	1.01415e+09	1.1657e+09	1.14802e+09	1.29491e+09	7.30369e+08	1.58382e+09	1.05964e+09	1.30417e+09	1.27477e+09	9.37473e+08
M182T81	L-Homocysteic acid	182.013	80.6	183.02	0.681271	C4H9NO5S	[M-H]-	Carboxylic acids and derivatives	Amino acids, peptides, and analogues	C16511	Signaling molecules and interaction	14857-77-3	HMDB0002205	BioDeepDB	2	neg	1.30915e+07	1.19693e+07	1.26525e+07	1.25437e+07	1.60953e+07	9.20236e+06	1.52065e+07	1.68809e+07	1.37967e+07	2.60741e+07	2.40068e+07	1.8439e+07	1.17114e+07	1.05261e+07	1.08745e+07	8.75878e+06	7.37878e+06	6.40838e+06	4.91656e+06	7.09856e+06	8.93714e+06	9.56994e+06	1.12013e+07	1.35119e+07
M243T122_2	Azacitidine	243.081	121.9	244.081	28.6983	C8H12N4O5	[M-H]-	Organooxygen compounds	Carbohydrates and carbohydrate conjugates	C11262		320-67-2	HMDB0015063	BioDeepDB	2	neg	1.77778e+06	1.67235e+06	1.46911e+06	2.02924e+06	9.7643e+06	7.87371e+06	6.08718e+06	1.32637e+06	1.56533e+06	6.95608e+06	1.29723e+07	1.58276e+06	6.56755e+06	6.87949e+06	6.60735e+06	7.0801e+06	7.53798e+06	5.76985e+06	3.78108e+06	5.01113e+06	1.01248e+07	5.39822e+06	6.96984e+06	1.29541e+06
M254T611	Daidzein	254.054	611.1	254.058	16.9256	C15H10O4	[M]-	Isoflavonoids	Isoflav-2-enes	C10208	Chemical structure transformation maps; Biosynthesis of other secondary metabolites; Global and overview maps	486-66-8	HMDB0003312	BioDeepDB	2	neg	143359	179830	125182	195670	121425	136159	150905	207407	129709	72497.1	31284.6	55815.6	203434	21445	353414	142969	224133	34459.4	191874	164707	178164	119132	159938	159979
M229T529	Dodecanedioic acid	229.144	529.3	230.152	3.05485	C12H22O4	[M-H]-	Fatty Acyls	Fatty acids and conjugates	C02678		693-23-2	HMDB0000623	BioDeepDB	2	neg	1.49837e+06	1.32587e+06	1.43047e+06	1.66025e+06	1.33217e+06	1.34321e+06	1.44268e+06	1.31604e+06	1.58904e+06	1.69791e+06	1.61096e+06	1.37493e+06	1.97135e+06	2.14089e+06	1.58354e+06	1.50731e+06	1.23564e+06	1.34746e+06	1.60295e+06	1.57877e+06	1.37891e+06	1.32501e+06	1.67846e+06	1.41001e+06
M188T301	Miglitol	188.093	300.6	207.111	2.6051	C8H17NO5	[M-H2O-H]-	Piperidines		C07708		72432-03-2	HMDB0014634	BioDeepDB	2	neg	3.0976e+06	4.12971e+06	3.36031e+06	4.69767e+06	3.40103e+06	3.65333e+06	3.67564e+06	5.5683e+06	2.75991e+06	5.20154e+06	2.5552e+06	3.90579e+06	3.51611e+06	5.01683e+06	3.44092e+06	3.01227e+06	2.23832e+06	2.17783e+06	2.35507e+06	2.54729e+06	2.17119e+06	3.80926e+06	3.48547e+06	5.31415e+06
M151T91_2	D-Xylitol	151.061	90.6	152.069	0	C5H12O5	[M-H]-	Organooxygen compounds	Carbohydrates and carbohydrate conjugates	C00379	Carbohydrate metabolism; Membrane transport; Global and overview maps	87-99-0	HMDB0002917	BioDeepDB	2	neg	1.31769e+07	3.94424e+07	1.12537e+07	1.29244e+07	6.92066e+06	1.25316e+07	7.74081e+06	1.46395e+07	1.74711e+07	1.10472e+07	4.0064e+07	1.86365e+07	1.25308e+07	1.25332e+07	1.72564e+07	8.02568e+06	1.0252e+07	3.73497e+07	3.65405e+07	2.13208e+07	3.24725e+07	3.58058e+07	3.17778e+07	4.42371e+07
M588T91_1	GDP-L-fucose	588.071	90.6	589.082	6.50262	C16H25N5O15P2	[M-H]-	Purine nucleotides	Purine nucleotide sugars	C00325	Carbohydrate metabolism; Glycan biosynthesis and metabolism; Global and overview maps	15839-70-0/NA	HMDB0001095	BioDeepDB	2	neg	1.1139e+06	1.21735e+06	1.14379e+06	1.11163e+06	1.32955e+06	1.21403e+06	819388	1.18663e+06	1.11068e+06	1.60449e+06	1.84511e+06	1.22648e+06	1.63563e+06	1.9582e+06	1.16377e+06	1.76768e+06	1.06637e+06	1.08202e+06	989383	885772	1.40168e+06	1.01924e+06	978548	1.07172e+06
M169T91	Gallic acid	169.018	91.1	170.022	20.5659	C7H6O5	[M-H]-	Benzene and substituted derivatives	Benzoic acids and derivatives	C01424	Chemical structure transformation maps; Xenobiotics biodegradation and metabolism; Global and overview maps	149-91-7	HMDB0005807	BioDeepDB	2	neg	2.72974e+06	1.71714e+06	2.68419e+06	1.84254e+06	2.66877e+06	2.81088e+06	1.50093e+06	1.33745e+06	2.79986e+06	2.92138e+06	2.79811e+06	2.1569e+06	2.21764e+06	3.46749e+06	2.38183e+06	3.56742e+06	2.3087e+06	2.62318e+06	2.25106e+06	2.75636e+06	1.88663e+06	2.20057e+06	2.12806e+06	1.27551e+06
M103T92	(R)-3-Hydroxybutyric acid	103.04	92.2	104.047	2.17392	C4H8O3	[M-H]-	Hydroxy acids and derivatives	Beta hydroxy acids and derivatives	C01089	Carbohydrate metabolism; Signal transduction; Global and overview maps	625-72-9/300-85-6	HMDB0000011	BioDeepDB	2	neg	1.17277e+08	2.72369e+08	1.37776e+08	2.69904e+07	1.42797e+08	6.73136e+07	1.12052e+08	3.18693e+08	2.84611e+08	9.22085e+07	3.64422e+07	1.65817e+08	8.35082e+07	1.27019e+07	4.43356e+07	1.72831e+07	3.10153e+07	2.15353e+07	2.07036e+07	2.66972e+07	1.88775e+07	1.48006e+07	1.09933e+07	2.92638e+06
M129T96	Cyanuric acid	129.019	96.4	129.017	15.5015	C3H3N3O3	[M]-	Triazines	1,3,5-triazines	C06554	Xenobiotics biodegradation and metabolism; Global and overview maps	108-80-5/504-19-8	HMDB0041861	BioDeepDB	2	neg	4.06699e+06	2.00143e+06	1.85512e+07	2.45084e+06	3.15663e+06	4.20159e+06	4.23593e+07	1.46488e+07	1.83041e+07	3.61783e+06	1.76936e+07	1.02907e+07	2.03931e+07	3.58129e+06	1.41559e+07	2.06376e+07	4.44517e+07	1.23191e+07	2.35919e+07	2.98458e+07	2.85349e+07	4.96366e+07	8.54158e+06	6.08263e+06
M101T98	2-Ketobutyric acid	101.024	97.5	102.032	0.989861	C4H6O3	[M-H]-	Keto acids and derivatives	Short-chain keto acids and derivatives	C00109	Carbohydrate metabolism; Amino acid metabolism; Global and overview maps	600-18-0	HMDB0000005	BioDeepDB	2	neg	6.03211e+06	1.37386e+07	7.6426e+06	9.51063e+06	9.42999e+06	1.61784e+07	1.03241e+07	1.58819e+07	8.94169e+06	1.83493e+07	1.05597e+07	8.44525e+06	7.46254e+06	1.74585e+07	8.0954e+06	1.90076e+07	6.7736e+06	1.37499e+07	8.47864e+06	8.9274e+06	8.88263e+06	1.84199e+07	7.43856e+06	1.00038e+07
M168T100_2	1-Methylhistidine	168.078	100.3	169.085	0	C7H11N3O2	[M-H]-	Carboxylic acids and derivatives	Amino acids, peptides, and analogues	C01152	Amino acid metabolism; Global and overview maps	332-80-9/368-16-1	HMDB0000001	BioDeepDB	2	neg	4.0798e+06	2.14383e+06	9.43017e+06	2.03257e+06	3.16769e+06	5.23114e+06	2.677e+06	2.59564e+06	2.45417e+06	3.54232e+06	3.85195e+06	3.1698e+06	4.24725e+06	1.23378e+06	6.93234e+06	4.88382e+06	908057	4.98465e+06	4.17478e+06	1.93196e+06	5.38279e+06	6.90483e+06	6.06543e+06	6.66161e+06
M127T121	Adipic acid	127.04	121.2	146.058	3.85705	C6H10O4	[M-H2O-H]-	Fatty Acyls	Fatty acids and conjugates	C06104	Xenobiotics biodegradation and metabolism; Global and overview maps	124-04-9	HMDB0000448	BioDeepDB	2	neg	3.07563e+07	4.72385e+07	2.56706e+07	4.12196e+07	3.9287e+07	4.09624e+07	2.5643e+07	2.23766e+07	3.24481e+07	4.70569e+07	2.6321e+07	2.20589e+07	3.62713e+07	7.18422e+07	4.86294e+07	7.14057e+07	3.51477e+07	4.9806e+07	4.70596e+07	2.60317e+07	5.3512e+07	5.30117e+07	8.35884e+07	7.40805e+07
M148T122	L-Methionine	148.044	121.7	149.051	0.675475	C5H11NO2S	[M-H]-	Carboxylic acids and derivatives	Amino acids, peptides, and analogues	C00073	Cancer: overview; Drug resistance: antineoplastic; Digestive system; Biosynthesis of other secondary metabolites; Translation; Amino acid metabolism; Chemical structure transformation maps; Global and overview maps	63-68-3	HMDB0000696	BioDeepDB	2	neg	2.86309e+07	4.59056e+07	6.55969e+07	3.77078e+07	5.28342e+07	3.77227e+07	7.40765e+07	4.10482e+07	4.29755e+07	6.2931e+07	3.09977e+07	4.36644e+07	8.27706e+07	6.78854e+07	6.58869e+07	3.27195e+07	3.43201e+07	4.3655e+07	8.48986e+07	6.67088e+07	7.91608e+07	7.4069e+07	3.67729e+07	3.26378e+07
M171T113	Hydantoin-5-propionic acid	171.041	112.7	172.048	1.75397	C6H8N2O4	[M-H]-	Azolidines	Imidazolidines	C05565	Amino acid metabolism	5624-26-0	HMDB0001212	BioDeepDB	2	neg	328054	329858	444590	512015	587318	284941	779261	683733	586959	285326	1.12114e+06	339443	489029	504116	378321	400426	419467	352078	353140	398611	215210	335579	131558	163613
M135T122	Hypoxanthine	135.031	121.9	136.038	0	C5H4N4O	[M-H]-	Imidazopyrimidines	Purines and purine derivatives	C00262	Global and overview maps; Nucleotide metabolism	68-94-0	HMDB0000157	BioDeepDB	2	neg	9.02346e+08	2.53612e+09	6.42585e+08	2.72171e+09	1.0328e+09	9.08379e+08	6.36427e+08	5.42777e+08	1.0408e+09	1.23418e+09	9.03516e+08	8.05714e+08	4.61979e+08	7.47568e+08	8.28155e+08	7.25102e+08	3.45646e+08	6.32078e+08	3.78718e+08	5.02071e+08	3.97222e+08	4.50551e+08	5.68606e+08	4.28482e+08
M181T154	Hydroxyphenyllactic acid	181.05	153.8	182.058	0.552332	C9H10O4	[M-H]-	Phenylpropanoic acids		C03672		306-23-0	HMDB0000755	BioDeepDB	2	neg	1.49372e+06	1.98545e+06	1.46749e+06	1.8839e+06	2.49994e+06	1.3085e+06	1.33545e+06	1.9899e+06	1.58249e+06	2.3385e+06	2.40301e+06	1.82174e+06	1.07585e+07	1.01066e+07	7.65001e+06	4.29272e+06	3.49946e+06	4.90017e+06	1.40041e+06	1.607e+06	2.28651e+06	1.94359e+06	3.18978e+06	9.34762e+06
M313T769	9,10-DHOME	313.236	769.4	314.246	6.0657	C18H34O4	[M-H]-	Fatty Acyls	Fatty acids and conjugates	C14828	Lipid metabolism	263399-34-4	HMDB0004704	BioDeepDB	2	neg	1.09576e+07	1.03374e+07	8.12053e+06	1.31759e+07	9.17397e+06	2.91962e+06	8.51652e+06	1.00977e+07	1.12933e+07	1.12775e+07	9.00472e+06	1.3884e+07	6.25727e+06	8.88076e+06	9.43793e+06	1.15875e+07	7.90111e+06	8.9078e+06	3.32895e+06	1.15245e+07	9.27847e+06	4.03387e+06	6.49526e+06	1.46562e+07
M176T147	N-Formyl-L-methionine	176.039	147.3	177.046	0.431723	C6H11NO3S	[M-H]-	Carboxylic acids and derivatives	Amino acids, peptides, and analogues	C03145	Amino acid metabolism	4289-98-9	HMDB0001015	BioDeepDB	2	neg	2.94849e+06	2.81484e+06	1.92853e+06	1.64284e+06	2.16059e+06	965376	2.55596e+06	1.46327e+06	747710	774165	1.49489e+06	1.0131e+06	300307	287808	1.94731e+06	1.37649e+06	314382	1.25652e+06	791356	787308	218863	474300	224679	185773
M151T151	Xanthine	151.026	151	152.033	0.503224	C5H4N4O2	[M-H]-	Imidazopyrimidines	Purines and purine derivatives	C00385	Chemical structure transformation maps; Biosynthesis of other secondary metabolites; Global and overview maps; Nucleotide metabolism	69-89-6	HMDB0000292	BioDeepDB	2	neg	1.84113e+08	9.78924e+07	1.50423e+08	1.3464e+08	1.49425e+08	1.67542e+08	2.08861e+08	7.84349e+07	1.37182e+08	1.66005e+08	1.72641e+08	1.50364e+08	1.88184e+08	2.55022e+08	1.78817e+08	8.09784e+07	7.73818e+07	1.67644e+08	4.65158e+07	1.62313e+08	1.50441e+08	1.7793e+08	1.72757e+08	1.67329e+08
M133T153	L-Malic acid	133.013	153.5	134.022	5.26262	C4H6O5	[M-H]-	Fatty Acyls	Fatty acids and conjugates	C00149	Cancer: overview; Chemical structure transformation maps; Signal transduction; Sensory system; Endocrine system; Excretory system; Carbohydrate metabolism; Cancer: specific types; Energy metabolism; Global and overview maps	636-61-3	HMDB0031518	BioDeepDB	2	neg	1.00563e+07	1.14869e+07	9.72496e+06	8.34097e+06	9.81371e+06	6.47441e+06	1.07602e+07	9.52294e+06	1.0633e+07	1.15464e+07	9.95218e+06	1.43656e+07	1.19735e+07	9.6653e+06	1.56685e+07	1.02539e+07	1.4067e+07	1.65162e+07	1.58975e+07	1.37758e+07	1.18908e+07	1.70659e+07	9.812e+06	1.0218e+07
M131T236	Beta-Guanidinopropionic acid	131.071	236.3	131.07	14.4959	C4H9N3O2	[M]-	Organonitrogen compounds	Guanidines	C03065		353-09-3	HMDB0013222	BioDeepDB	2	neg	2.46072e+06	1.28787e+07	1.40439e+06	1.63096e+06	1.08652e+06	873151	1.66805e+06	1.38092e+06	511380	1.52198e+06	1.97127e+06	440176	507934	523545	684865	747345	1.54461e+06	688093	865799	902497	514157	649895	2.65819e+06	928123
M134T243	Adenine	134.047	243.4	135.054	0	C5H5N5	[M-H]-	Imidazopyrimidines	Purines and purine derivatives	C00147	Metabolism of terpenoids and polyketides; Global and overview maps; Nucleotide metabolism	73-24-5	HMDB0000034	BioDeepDB	2	neg	1.99755e+07	1.17207e+08	1.06068e+07	1.14154e+07	8.64984e+06	5.79148e+06	1.3329e+07	1.03397e+07	3.92079e+06	1.23097e+07	1.81418e+07	2.45653e+06	1.96481e+06	2.17795e+06	4.45653e+06	4.37894e+06	1.04042e+07	3.53926e+06	3.97599e+06	5.32207e+06	3.19298e+06	4.54222e+06	2.09088e+07	5.10276e+06
M267T251_1	Inosine	267.073	250.8	268.081	0.748858	C10H12N4O5	[M-H]-	Purine nucleosides		C00294	Membrane transport; Global and overview maps; Nucleotide metabolism	58-63-9	HMDB0000195	BioDeepDB	2	neg	1.74474e+09	4.13447e+08	1.19042e+09	9.43838e+08	3.64178e+08	1.02983e+09	9.98148e+08	3.26358e+09	2.64199e+09	4.49286e+08	4.41196e+08	1.64422e+09	1.66912e+09	3.84037e+08	6.11922e+08	4.06131e+08	2.09671e+09	1.63375e+09	4.92363e+08	1.0843e+09	4.52617e+08	4.69264e+08	4.49766e+08	4.71218e+08
M115T111_2	alpha-Ketoisovaleric acid	115.04	111.4	116.047	0.277156	C5H8O3	[M-H]-	Keto acids and derivatives	Short-chain keto acids and derivatives	C00141	Amino acid metabolism; Metabolism of cofactors and vitamins; Biosynthesis of other secondary metabolites; Global and overview maps	759-05-7	HMDB0000019	MoNA	2	neg	3.46969e+06	3.55494e+06	3.39083e+06	3.62876e+06	3.49632e+06	2.88358e+06	3.43564e+06	2.84869e+06	2.76288e+06	4.46927e+06	3.30936e+06	3.16366e+06	3.90146e+06	3.15631e+06	3.21367e+06	4.33934e+06	3.82818e+06	4.34146e+06	3.57301e+06	4.50334e+06	1.59155e+06	3.99748e+06	3.50491e+06	3.69073e+06
M159T465	3-Hydroxyvalproic acid	159.102	465.1	160.11	0.779372	C8H16O3	[M-H]-	Fatty Acyls	Fatty acids and conjugates	C16651	Xenobiotics biodegradation and metabolism	58888-84-9	HMDB0013899	BioDeepDB	2	neg	1.64093e+06	2.22964e+06	3.44925e+06	2.11159e+06	2.7023e+06	3.21417e+06	4.88902e+06	1.41458e+07	6.32317e+06	3.48655e+07	6.79583e+07	2.58348e+07	1.88872e+07	2.12503e+07	3.77442e+06	1.36002e+07	3.32377e+07	4.20975e+06	3.97281e+06	2.639e+07	5.56623e+07	5.39395e+07	1.95413e+07	1.08942e+08
M172T447	Quinaldic acid	172.041	447.2	173.048	0.441756	C10H7NO2	[M-H]-	Quinolines and derivatives	Quinoline carboxylic acids	C06325		93-10-7	HMDB0000842	BioDeepDB	2	neg	722013	623155	843369	823566	721858	443756	723851	436764	710521	871619	376161	924339	1.07043e+06	797312	672547	685314	669503	649467	564728	573928	540202	1.12696e+06	301448	739112
M209T483	Jasmonic acid	209.118	482.9	210.126	0.36343	C12H18O3	[M-H]-	Fatty Acyls	Lineolic acids and derivatives	C08491	Lipid metabolism; Signal transduction; Chemical structure transformation maps; Global and overview maps	59366-47-1/6894-38-8	HMDB0032797	BioDeepDB	2	neg	2.31269e+06	1.92524e+06	2.71611e+06	710592	1.33371e+06	1.32935e+06	1.59353e+06	2.03704e+06	1.03192e+06	386843	1.48725e+06	2.1177e+06	353804	47244.7	1.20078e+06	1.19287e+06	952919	1.84446e+06	934478	1.32631e+06	633356	1.00141e+06	53904	73596.1
M151T603	3-Hydroxyphenylacetic acid	151.04	603.2	152.047	0.211096	C8H8O3	[M-H]-	Phenols	1-hydroxy-4-unsubstituted benzenoids	C05593	Amino acid metabolism; Xenobiotics biodegradation and metabolism; Global and overview maps	621-37-4	HMDB0000440	MoNA	2	neg	2.39336e+06	3.46131e+06	3.69165e+06	757190	3.83162e+06	2.22561e+06	3.5074e+06	2.93898e+06	3.31974e+06	1.34921e+06	4.55378e+06	3.32113e+06	5.41242e+06	1.70117e+06	4.98307e+06	3.92247e+06	1.25516e+06	6.68181e+06	1.82827e+06	3.15394e+06	1.27439e+06	1.34914e+06	1.99211e+06	2.16571e+06
M369T537_2	6-Keto-prostaglandin F1a	369.227	536.6	370.236	3.31503	C20H34O6	[M-H]-	Fatty Acyls	Eicosanoids	C05961	Lipid metabolism; Global and overview maps	58962-34-8	HMDB0002886	BioDeepDB	2	neg	5.07848e+07	2.02976e+07	3.79484e+07	3.00705e+07	5.52049e+07	4.73357e+07	6.13921e+07	4.25292e+07	4.17329e+07	4.87899e+07	6.77413e+07	5.36178e+07	5.55717e+07	5.04276e+07	4.9793e+07	4.51065e+07	5.45387e+07	5.09104e+07	3.51047e+07	4.2619e+07	5.9249e+07	5.78864e+07	5.67022e+07	4.49086e+07
M369T590	Thromboxane B2	369.229	590.4	370.236	0.812505	C20H34O6	[M-H]-	Fatty Acyls	Eicosanoids	C05963	Lipid metabolism; Nervous system; Global and overview maps; Digestive system	54397-85-2	HMDB0003252	BioDeepDB	2	neg	1.44984e+06	1.00888e+06	1.90371e+06	2.3131e+06	2.64981e+06	1.19657e+06	2.0897e+06	1.12347e+06	2.70172e+06	549197	2.92195e+06	4.17268e+06	2.00451e+06	1.89105e+06	2.05042e+06	4.16267e+06	1.64826e+06	1.75906e+06	2.13212e+06	4.29383e+06	2.84646e+06	2.08871e+06	625297	1.14386e+06
M355T621	Prostaglandin F1a	355.239	620.6	356.256	27.3055	C20H36O5	[M-H]-	Fatty Acyls	Eicosanoids	C06475		745-62-0	HMDB0002685	BioDeepDB	2	neg	347518	248597	241178	281739	454790	232818	528806	299164	283024	283626	285179	268926	328864	142294	338443	310493	320848	299351	279387	419282	288938	366038	457207	150575
M325T793	11-Dehydrocorticosterone	325.184	792.6	344.199	11.0399	C21H28O4	[M-H2O-H]-	Steroids and steroid derivatives	Hydroxysteroids	C05490	Lipid metabolism	72-23-1	HMDB0004029	BioDeepDB	2	neg	9.96022e+06	1.06111e+07	8.82127e+06	3.91481e+07	2.54374e+07	8.22941e+06	1.11637e+07	3.27687e+07	9.52361e+06	4.79367e+07	7.1242e+06	4.25452e+06	9.76901e+07	3.76994e+07	3.61179e+07	1.11364e+07	1.26181e+07	1.05639e+07	1.10992e+07	2.78179e+07	2.54114e+07	4.06673e+07	1.06811e+08	4.31283e+07
M351T717	Prostaglandin D2	351.217	716.5	352.225	2.27779	C20H32O5	[M-H]-	Fatty Acyls	Eicosanoids	C00696	Nervous system; Lipid metabolism; Signaling molecules and interaction; Immune disease; Immune system; Infectious disease: parasitic; Global and overview maps	41598-07-6	HMDB0001403	BioDeepDB	2	neg	9.44604e+06	4.58745e+06	3.44983e+06	4.2347e+06	7.04322e+06	7.15678e+06	9.20823e+06	1.15557e+07	1.58206e+07	1.67449e+07	7.24032e+06	4.55495e+06	4.95647e+06	2.8949e+06	4.88724e+06	6.02005e+06	5.46774e+06	1.77481e+06	4.89947e+06	2.11441e+06	1.21408e+07	2.92221e+06	5.85577e+06	1.71808e+07
M335T747	11b-PGF2a	335.221	747.5	354.241	3.01294	C20H34O5	[M-H2O-H]-	Fatty Acyls	Eicosanoids	C05959	Lipid metabolism	38432-87-0	HMDB0010199	BioDeepDB	2	neg	3.9993e+06	3.44653e+06	2.40485e+06	2.77621e+06	2.41368e+06	2.10987e+06	3.19433e+06	1.44541e+06	3.09698e+06	2.47236e+06	1.29695e+06	1.89637e+06	4.13949e+06	3.69986e+06	5.4559e+06	3.70473e+06	3.72036e+06	3.46391e+06	2.69767e+06	4.69977e+06	4.80535e+06	2.3682e+06	2.57634e+06	2.71513e+06
M311T799	9(S)-HPODE	311.221	799	312.23	4.49841	C18H32O4	[M-H]-	Fatty Acyls	Lineolic acids and derivatives	C14827	Lipid metabolism; Global and overview maps	29774-12-7	HMDB0006940	BioDeepDB	2	neg	1.30904e+07	5.11796e+06	5.18418e+06	1.99061e+07	7.26369e+06	1.02447e+07	5.23538e+06	5.94465e+06	6.84101e+06	1.58366e+07	3.53339e+06	2.95436e+06	1.72285e+07	6.80919e+06	1.18684e+07	1.19327e+07	7.3408e+06	3.36266e+06	3.0428e+06	2.62998e+06	1.36454e+06	2.22903e+06	1.96263e+06	9.94941e+06
M334T765	Prostaglandin B2	334.205	764.6	334.214	27.8272	C20H30O4	[M]-	Fatty Acyls	Eicosanoids	C05954	Lipid metabolism; Nervous system; Global and overview maps	13367-85-6	HMDB0004236	BioDeepDB	2	neg	4.13507e+06	4.06072e+06	3.77622e+06	1.41794e+06	3.60491e+06	2.58258e+06	3.5581e+06	4.33383e+06	4.45073e+06	4.23226e+06	5.04717e+06	3.89997e+06	4.32495e+06	4.84768e+06	3.62086e+06	5.09258e+06	3.96665e+06	3.64782e+06	4.69557e+06	4.48702e+06	3.45824e+06	4.19691e+06	3.95307e+06	5.41214e+06
M337T783	14,15-DiHETrE	337.238	783.1	338.246	1.48263	C20H34O4	[M-H]-	Fatty Acyls	Eicosanoids	C14775	Lipid metabolism; Nervous system; Global and overview maps	77667-09-5/NA	HMDB0002265	BioDeepDB	2	neg	5.23166e+06	3.22651e+06	1.05723e+06	1.01981e+07	1.00887e+06	3.45915e+06	4.00507e+06	1.9317e+06	3.72663e+06	1.76151e+06	1.33332e+06	3.26832e+06	6.32715e+06	1.25874e+06	1.35933e+06	1.23731e+06	3.07989e+06	1.85332e+06	934774	2.85607e+06	1.73467e+06	2.03792e+06	1.1929e+06	1.41295e+06
M329T822_2	Docosapentaenoic acid (22n-3)	329.257	822.1	330.256	26.6539	C22H34O2	[M-H]-	Fatty Acyls	Fatty acids and conjugates	C16513	Lipid metabolism	24880-45-3	HMDB0006528	BioDeepDB	2	neg	1.7141e+08	3.90753e+08	9.15981e+07	4.06842e+08	9.76048e+07	1.33103e+08	4.8017e+07	3.71247e+07	2.87336e+07	8.00658e+07	4.15374e+07	1.70102e+07	2.16675e+07	1.64142e+08	1.68796e+08	1.61313e+08	1.83228e+07	1.18929e+08	2.7283e+07	1.27317e+07	1.279e+07	1.61075e+07	8.87996e+07	5.3308e+07
M279T812	Bovinic acid	279.229	811.9	280.24	12.2623	C18H32O2	[M-H]-	Fatty Acyls	Lineolic acids and derivatives	C04056	Lipid metabolism	2540-56-9	HMDB0003797	BioDeepDB	2	neg	8.09309e+07	1.37818e+08	1.82936e+07	8.9618e+07	2.25344e+07	6.67798e+07	1.22516e+08	4.32481e+07	1.16373e+08	1.04946e+08	5.6551e+07	8.42243e+07	4.49743e+08	6.93285e+08	3.42485e+08	2.21326e+08	8.48971e+07	4.31604e+07	3.08023e+08	5.08965e+07	6.64786e+07	2.27703e+08	1.89038e+08	1.24529e+08
M293T812	9-OxoODE	293.211	812	294.219	2.72841	C18H30O3	[M-H]-	Fatty Acyls	Lineolic acids and derivatives	C14766	Lipid metabolism	54232-59-6	HMDB0004669	BioDeepDB	2	neg	4.66924e+06	8.6548e+06	7.68804e+06	9.42529e+06	9.93632e+06	7.98048e+06	7.18226e+06	2.84826e+06	6.22694e+06	1.49784e+07	5.2648e+06	5.20643e+06	3.41951e+07	6.92833e+07	1.54157e+07	2.17139e+07	2.84358e+07	1.94519e+07	1.38941e+07	1.48385e+07	4.79986e+07	2.20789e+07	3.13783e+07	2.61283e+07
M295T816	13S-hydroxyoctadecadienoic acid	295.227	815.9	296.235	1.43618	C18H32O3	[M-H]-	Fatty Acyls	Lineolic acids and derivatives	C14762	Lipid metabolism; Endocrine system	5204-88-6/29623-28-7	HMDB0004667	BioDeepDB	2	neg	2.55252e+07	7.62506e+07	1.2319e+07	6.34079e+07	2.10722e+07	2.97092e+07	1.53363e+07	9.47748e+06	8.4596e+06	1.82945e+07	9.29323e+06	2.54926e+06	1.17235e+07	3.28388e+07	2.99619e+07	3.12971e+07	6.16204e+06	2.72491e+07	3.32078e+06	5.5085e+06	5.15037e+06	6.78787e+06	2.49049e+07	2.17134e+07
M327T837_2	Docosahexaenoic acid	327.231	836.8	328.24	4.35166	C22H32O2	[M-H]-	Fatty Acyls	Fatty acids and conjugates	C06429	Lipid metabolism	6217-54-5	HMDB0002183	BioDeepDB	2	neg	6.63342e+07	1.76682e+07	6.01013e+07	2.00396e+07	1.62729e+07	1.8415e+07	8.23241e+07	9.47596e+07	8.08987e+07	9.03187e+07	1.14745e+08	1.11657e+08	3.67327e+07	5.97711e+07	2.82109e+07	5.06318e+07	1.05232e+08	2.64183e+07	6.27381e+07	1.17245e+08	8.78096e+07	1.0946e+08	1.33137e+07	1.94404e+07
M282T838	Vaccenic acid	282.252	838	282.256	12.7545	C18H34O2	[M]-	Fatty Acyls	Fatty acids and conjugates	C08367		693-72-1	HMDB0003231	BioDeepDB	2	neg	1.70558e+07	1.06789e+07	1.65438e+07	2.36595e+07	1.63858e+07	1.21745e+07	1.69572e+07	1.69922e+07	2.30864e+07	3.4376e+07	6.09133e+06	8.29811e+06	7.19592e+06	2.15325e+07	2.81169e+07	1.99398e+07	1.24044e+07	9.16414e+06	1.35386e+07	1.39328e+07	1.52239e+07	1.54753e+07	3.01422e+07	2.32797e+07
M319T829	19(S)-HETE	319.227	829.5	320.235	1.64146	C20H32O3	[M-H]-	Fatty Acyls	Eicosanoids	C14749	Lipid metabolism; Global and overview maps	79551-85-2/115461-40-0	HMDB0011136	BioDeepDB	2	neg	8.53921e+06	8.85976e+06	2.216e+07	8.49604e+06	1.88199e+07	1.44358e+07	2.0924e+07	8.31936e+06	3.04742e+07	2.74498e+07	2.39877e+07	3.25762e+07	2.40325e+07	3.24874e+07	2.25898e+07	2.11412e+07	3.2117e+07	1.13145e+07	1.95556e+07	3.11461e+07	2.54207e+07	1.35943e+07	2.55833e+07	3.27581e+07
M306T96	(-)-Epigallocatechin	306.076	95.9	306.074	5.55418	C15H14O7	[M]-	Flavonoids	Flavans	C12136	Biosynthesis of other secondary metabolites; Global and overview maps	970-74-1	HMDB0038361	MoNA	2	neg	5.3227e+07	7.536e+07	1.4411e+08	5.2656e+07	1.81538e+08	9.4143e+07	1.27857e+08	5.94387e+07	4.18598e+07	1.0663e+07	1.73018e+08	9.75356e+06	8.4414e+07	2.39639e+07	1.12446e+08	1.36862e+08	1.04966e+08	5.06747e+07	1.35192e+08	1.9606e+08	1.02997e+08	1.67134e+08	1.57849e+08	1.20595e+07
M138T637	6-Hydroxynicotinic acid	138.02	637	139.027	0.238951	C6H5NO3	[M-H]-	Pyridines and derivatives	Pyridinecarboxylic acids and derivatives	C01020	Metabolism of cofactors and vitamins; Global and overview maps	5006-66-6	HMDB0002658	MoNA	2	neg	318821	716989	760285	840410	995884	1.17429e+06	1.80827e+06	1.11099e+06	760263	1.6545e+06	1.014e+06	838355	851509	396098	252119	781596	382424	696861	432373	653375	484265	455944	323770	424630
M171T78	Beta-Glycerophosphoric acid	171.006	77.7	172.014	0.00796461	C3H9O6P	[M-H]-	Glycerophospholipids	Glycerophosphates	C02979		17181-54-3	HMDB0002520	MoNA	2	neg	6.98946e+07	6.3791e+07	6.32765e+07	6.2202e+07	1.6364e+08	7.94075e+07	5.05972e+07	5.22996e+07	3.48066e+07	5.84762e+07	1.0275e+08	2.96542e+07	4.34308e+07	4.47134e+07	2.71673e+07	2.96681e+07	8.96275e+06	9.31002e+06	9.44535e+06	6.89804e+06	2.38676e+07	8.7092e+06	1.03259e+07	9.28628e+06
M324T81	N-Glycolylneuraminic acid	324.094	81.5	325.101	0.2345	C11H19NO10	[M-H]-	Organooxygen compounds	Carbohydrates and carbohydrate conjugates	C03410	Carbohydrate metabolism	1113-83-3	HMDB0000833	MoNA	2	neg	3.40156e+07	2.40694e+07	4.02674e+07	3.30318e+07	2.12708e+08	3.32407e+07	3.76383e+07	1.48719e+08	2.97304e+07	4.74266e+07	6.38412e+07	5.55583e+07	6.66542e+07	5.90244e+07	9.06056e+07	1.00173e+08	1.09327e+08	9.99764e+07	6.64916e+07	4.98472e+07	6.96332e+07	7.35849e+07	7.86182e+07	9.55907e+07
M129T88	Citramalic acid	129.019	88.3	148.037	4.57296	C5H8O5	[M-H2O-H]-	Fatty Acyls	Fatty acids and conjugates	C00815		597-44-4/2306-22-1	HMDB0000426	MoNA	2	neg	8.88109e+06	2.93327e+07	2.40652e+07	2.2125e+07	3.5417e+07	7.69942e+06	2.51803e+07	2.76675e+07	2.75644e+07	2.7339e+07	8.71074e+06	8.99054e+06	2.91375e+07	2.85914e+07	7.47484e+06	7.72911e+06	2.71437e+07	3.6353e+07	3.05942e+07	2.67214e+07	2.99486e+07	3.57713e+07	2.53185e+07	7.96679e+06
M378T122_1	S-Lactoylglutathione	378.096	121.6	379.105	4.55969	C13H21N3O8S	[M-H]-	Carboxylic acids and derivatives	Amino acids, peptides, and analogues	C03451	Carbohydrate metabolism; Global and overview maps	25138-66-3/41656-56-8	HMDB0001066	MoNA	2	neg	1.57237e+07	1.04186e+07	1.65143e+07	1.14005e+07	1.26001e+07	1.04603e+07	1.48303e+07	1.25404e+07	1.61266e+07	1.23151e+07	1.81731e+07	1.30512e+07	1.48063e+07	1.03615e+07	1.52776e+07	1.2918e+07	1.51602e+07	1.10043e+07	1.47691e+07	1.45428e+07	1.50336e+07	1.40168e+07	9.81988e+06	7.71747e+06
M129T148	Itaconate	129.018	147.8	130.027	7.93686	C5H6O4	[M-H]-	Fatty Acyls	Fatty acids and conjugates	C00490	Carbohydrate metabolism; Global and overview maps	c("97-65-4", "2964-00-3")	HMDB0002092	mzCloud	2	neg	1.26526e+06	645514	692737	1.34507e+06	807554	1.36848e+06	136551	934042	2.15487e+06	2.14106e+06	2.20155e+06	1.21559e+06	1.2131e+06	1.31928e+06	1.07949e+06	161249	1.3046e+06	922559	1.56568e+06	739259	976534	455418	730172	315820
M253T611	5,7-Dihydroxyflavone	253.05	611.4	254.058	1.67556	C15H10O4	[M-H]-	Flavonoids	Flavones	C10028	Biosynthesis of other secondary metabolites	480-40-0	HMDB0036619	MoNA	2	neg	2.95059e+06	2.28355e+06	549048	1.81328e+06	1.6494e+06	519461	591099	962023	663628	2.03487e+06	2.06333e+06	494506	1.97876e+06	554064	2.17457e+06	1.7863e+06	1.12011e+06	3.11494e+06	1.73931e+06	351265	1.84827e+06	1.70817e+06	254975	361373
M201T109	Asymmetric dimethylarginine	201.135	109.3	202.143	1.49062	C8H18N4O2	[M-H]-	Carboxylic acids and derivatives	Amino acids, peptides, and analogues	C03626		30315-93-6/220805-22-1	HMDB0001539	MoNA	2	neg	2.45382e+07	1.14913e+07	4.02869e+07	4.59466e+07	1.5451e+07	4.65058e+06	1.0074e+07	7.28063e+06	4.4364e+07	5.90308e+06	4.41324e+07	5.45468e+06	2.19685e+07	2.0482e+07	1.47586e+07	2.0402e+07	1.88711e+07	5.06194e+06	1.25309e+07	1.18886e+07	1.10487e+07	6.22224e+06	5.99408e+06	1.11734e+07
M119T220	Purine	119.037	219.9	120.044	1.47854	C5H4N4	[M-H]-	Imidazopyrimidines	Purines and purine derivatives	C15587		120-73-0	HMDB0001366	MoNA	2	neg	1.18002e+07	9.91077e+06	3.69753e+06	9.68839e+06	1.2116e+07	9.69605e+06	5.05586e+06	8.14616e+06	1.14128e+07	2.91571e+07	9.54511e+06	5.6342e+06	3.23268e+06	2.16321e+06	1.08652e+07	8.59298e+06	3.52337e+06	7.15853e+06	2.11335e+06	1.4401e+07	6.73041e+06	3.24175e+06	4.59641e+06	8.41376e+06
M144T578	1H-Indole-3-carboxaldehyde	144.046	577.8	145.053	0.527611	C9H7NO	[M-H]-	Indoles and derivatives	Indoles	C08493		487-89-8	HMDB0029737	MoNA	2	neg	6.79448e+06	8.33583e+06	9.67965e+06	4.84898e+06	1.08784e+07	5.16489e+06	1.1951e+07	5.50706e+06	7.79659e+06	7.33859e+06	1.38699e+07	1.61897e+07	1.36228e+07	1.36727e+07	7.44016e+06	1.62711e+07	9.26438e+06	9.38569e+06	1.79444e+07	8.18688e+06	4.05701e+06	9.579e+06	8.69514e+06	1.00555e+07
M277T747	Dibutyl phthalate	277.144	747.4	278.152	1.52989	C16H22O4	[M-H]-	Benzene and substituted derivatives	Benzoic acids and derivatives	C14214		84-74-2	HMDB0033244	MoNA	2	neg	1.24249e+06	2.07119e+06	1.07418e+06	897911	1.45802e+06	1.97613e+06	1.30229e+06	1.92059e+06	3.60018e+06	2.22607e+06	2.40562e+06	2.90153e+06	3.41368e+06	2.36445e+06	2.08641e+06	3.64227e+06	3.67875e+06	4.93856e+06	3.00943e+06	3.5463e+06	3.20006e+06	2.5607e+06	2.26935e+06	2.28761e+06
M151T653	Oxypurinol	151.026	652.9	152.033	1.65952	C5H4N4O2	[M-H]-	Imidazopyrimidines	Purines and purine derivatives	C07599		2465-59-0	HMDB0000786	MoNA	2	neg	699172	1.28497e+06	1.19775e+06	375492	964917	1.45844e+06	1.01182e+06	538501	1.65034e+06	1.67465e+06	1.16583e+06	1.69332e+06	1.80871e+06	1.64974e+06	637252	1.84313e+06	484518	1.98151e+06	547454	1.40177e+06	1.6171e+06	543258	1.81413e+06	505667
M317T799	Bilobol	317.248	799.3	318.256	1.5897	C21H34O2	[M-H]-	Benzene and substituted derivatives	Phenols and derivatives	C10770		22910-86-7	HMDB0030983	MoNA	2	neg	1.44674e+07	9.61808e+06	9.64146e+06	1.08994e+07	1.46205e+07	1.0745e+07	1.22561e+07	7.26981e+06	7.48416e+06	6.71055e+06	1.07125e+07	1.44247e+07	1.56214e+07	1.29798e+07	1.5009e+07	1.31102e+07	1.01577e+07	1.31556e+07	6.13604e+06	1.33958e+07	1.79912e+07	1.32994e+07	1.46984e+07	1.25351e+07
M111T70	2-Furoate	111.009	70.3	112.016	0.68463	C5H4O3	[M-H]-	Furans	Furoic acid and derivatives	C01546	Xenobiotics biodegradation and metabolism; Global and overview maps	88-14-2	HMDB0000617	mzCloud	2	neg	4.19629e+06	4.44938e+06	3.17909e+06	4.60251e+06	4.16662e+06	5.35116e+06	3.35902e+06	3.72206e+06	1.06843e+06	4.15548e+06	3.82374e+06	3.4361e+06	5.56631e+06	6.25192e+06	3.49075e+06	4.37966e+06	3.13892e+06	734252	3.66791e+06	3.70025e+06	3.75218e+06	4.13139e+06	4.47046e+06	3.73323e+06
M330T152	Aflatoxin G2	330.067	152.5	330.074	20.1559	C17H14O7	[M]-	Coumarins and derivatives	Furanocoumarins	C16754	Biosynthesis of other secondary metabolites; Global and overview maps	7241-98-7	HMDB0030475	mzCloud	2	neg	2.26912e+06	5.30177e+06	1.95796e+06	2.72101e+06	838902	1.77303e+06	1.91415e+06	1.55534e+06	269709	2.009e+06	2.30683e+06	367353	234129	13177	1.19251e+06	53324.6	1.34795e+06	38115.8	180507	426562	662129	763784	770614	11708.4
M171T148	DL-Glycerol 1-phosphate	171.008	148.2	172.014	8.63118	C3H9O6P	[M-H]-	Glycerophospholipids	Glycerophosphates	C03189		57-03-4	HMDB0000126	mzCloud	2	neg	372016	340397	596844	474911	1.66981e+06	1.41907e+06	489465	1.64153e+06	1.76285e+06	719176	1.25166e+06	496962	2.77301e+06	1.94825e+06	1.17512e+06	1.20754e+06	411284	1.01376e+06	2.27709e+06	2.55506e+06	1.75479e+06	2.26313e+06	1.60714e+06	1.75649e+06
M179T737	Isopropylparaben	179.071	737.1	180.079	0.424412	C10H12O3	[M-H]-	Extractables/Leachables		C20343		4191-73-5		mzCloud	2	neg	2.16745e+06	1.83917e+06	2.44608e+06	1.51332e+06	2.50505e+06	2.96841e+06	2.51922e+06	3.29186e+06	3.1414e+06	3.87665e+06	3.07593e+06	2.26842e+06	2.6497e+06	3.84365e+06	2.71635e+06	2.77068e+06	3.04404e+06	3.58764e+06	3.24446e+06	1.28203e+06	3.084e+06	3.41289e+06	2.57525e+06	2.50508e+06
M220T98	N-Acetyl-D-galactosamine	220.082	98.3	221.09	1.47218	C8H15NO6	[M-H]-	Endogenous Metabolites		C01132	Carbohydrate metabolism; Membrane transport; Global and overview maps	c("14215-68-0", "1811-31-0")		mzCloud	2	neg	916437	741381	955870	577705	911251	572455	888587	699661	2.7058e+06	2.92526e+06	2.8008e+06	2.26601e+06	2.23477e+06	2.8991e+06	3.1197e+06	3.18261e+06	3.01271e+06	2.30911e+06	2.68353e+06	3.21435e+06	3.34996e+06	2.59227e+06	3.1122e+06	2.57521e+06
M131T355	6-Hydroxyhexanoic acid	131.071	354.6	132.079	0.579837	C6H12O3	[M-H]-	Hydroxy acids and derivatives	Medium-chain hydroxy acids and derivatives	C06103	Xenobiotics biodegradation and metabolism; Global and overview maps	1191-25-9	HMDB0012843	mzCloud	2	neg	2.86797e+06	304113	3.29477e+06	2.22691e+06	2.46684e+06	2.07993e+06	4.04745e+06	3.45386e+06	2.27355e+06	2.72939e+06	578385	2.95538e+06	2.63389e+06	1.76442e+06	2.88937e+06	3.7373e+06	3.62426e+06	2.27333e+06	2.45635e+06	4.49782e+06	3.44759e+06	2.73801e+06	420463	243001
M283T288	Xanthosine	283.068	288	284.076	1.1446	C10H12N4O6	[M-H]-	Purine nucleosides		C01762	Membrane transport; Biosynthesis of other secondary metabolites; Nucleotide metabolism; Chemical structure transformation maps; Global and overview maps	146-80-5	HMDB0000299	mzCloud	2	neg	1.03751e+08	8.34018e+07	6.06915e+07	8.084e+07	7.46297e+07	4.86429e+07	6.63791e+07	7.13985e+07	6.26391e+07	5.5463e+07	7.75329e+07	3.80389e+07	5.87387e+06	5.31688e+06	7.03892e+06	5.31397e+06	4.88673e+06	2.22932e+07	4.67063e+06	7.25732e+06	3.63146e+06	3.99903e+06	1.62638e+06	1.35622e+06
M223T147	3-Hydroxykynurenine	223.074	147.1	224.08	6.16836	C10H12N2O4	[M-H]-	Organooxygen compounds	Carbonyl compounds	C02794		c("2147-61-7", "484-78-6")	HMDB0000732	mzCloud	2	neg	799959	518925	537125	685170	1.32827e+06	1.39162e+06	589153	742973	720263	1.17527e+06	698572	1.00871e+06	900102	2.21708e+06	826509	1.30618e+06	1.34621e+06	1.03683e+06	1.30556e+06	1.02672e+06	1.90636e+06	1.34555e+06	3.24815e+06	1.53474e+06
M133T303	D-Malic acid	133.014	303.5	134.022	0.355616	C4H6O5	[M-H]-	Fatty Acyls	Fatty acids and conjugates	C00497	Carbohydrate metabolism; Global and overview maps	636-61-3	HMDB0031518	mzCloud	2	neg	2.98858e+06	3.67139e+06	3.21199e+06	3.51955e+06	3.30666e+06	789639	2.58308e+06	3.27554e+06	4.31466e+06	4.256e+06	3.66031e+06	3.58631e+06	2.23552e+06	2.02339e+06	2.85138e+06	1.70116e+06	2.12583e+06	3.06897e+06	2.23195e+06	3.32471e+06	2.40904e+06	2.69186e+06	1.25957e+06	906446
M279T320	Sulfamethoxypyridazine	279.057	319.8	280.063	4.53325	C11H12N4O3S	[M-H]-	Therapeutics/Prescription Drugs		D02439				mzCloud	2	neg	2.41722e+06	2.11736e+06	2.0861e+06	2.05834e+06	2.08437e+06	1.9286e+06	2.33649e+06	2.14972e+06	2.15608e+06	3.38858e+06	2.43981e+06	1.98335e+06	2.02596e+06	3.1387e+06	2.89659e+06	3.16866e+06	2.25272e+06	2.9592e+06	2.29187e+06	2.05156e+06	1.9003e+06	2.51814e+06	1.57434e+06	2.05762e+06
M135T521	Toluate	135.046	520.6	136.052	3.52474	C8H8O2	[M-H]-	Benzene and substituted derivatives	Benzoic acids and derivatives	C01454	Xenobiotics biodegradation and metabolism; Global and overview maps	99-94-5	HMDB0029635	mzCloud	2	neg	1.17236e+06	1.25672e+06	1.08575e+06	438617	1.52789e+06	304488	1.90434e+06	1.30741e+06	3.90441e+06	1.82937e+06	1.97258e+06	1.73189e+06	1.96163e+06	1.55083e+06	2.42929e+06	1.71047e+06	3.46566e+06	962616	2.31129e+06	2.16421e+06	4.3276e+06	3.97893e+06	185051	268923
M149T617	Phenylpropanoate	149.061	617.4	150.068	0.831876	C9H10O2	[M-H]-	Phenylpropanoic acids		C05629	Amino acid metabolism; Global and overview maps	501-52-0	HMDB0000764	mzCloud	2	neg	921332	1.21905e+06	968640	1.52188e+06	924023	707562	655029	1.1574e+06	959988	322883	403399	700187	274607	637828	735955	585742	680914	189410	695329	526218	633845	338974	261946	335346
M291T798	13(S)-HPOT	291.199	797.6	310.214	11.6415	C18H30O4	[M-H2O-H]-			C04785	Lipid metabolism; Global and overview maps			mzCloud	2	neg	1.88761e+07	1.07423e+07	1.0943e+07	5.56935e+06	1.16457e+07	5.67729e+06	1.53458e+07	3.89031e+06	1.8968e+06	6.1117e+06	6.0104e+06	1.05305e+07	1.1141e+07	8.17166e+06	1.1162e+07	4.20111e+06	5.71622e+06	9.4765e+06	3.50373e+06	7.52078e+06	8.52865e+06	8.80339e+06	5.04154e+06	1.38428e+07
M166T679	Ethylparaben	166.059	678.8	166.174	24.0528	C9H10O3	[M]-	Benzene and substituted derivatives	Benzoic acids and derivatives	D01647		120-47-8	HMDB0032573	mzCloud	2	neg	2.13405e+06	2.23301e+06	2.53183e+06	3.0765e+06	2.8141e+06	1.38221e+06	3.0804e+06	1.98691e+06	2.12716e+06	3.26711e+06	3.39637e+06	1.93131e+06	4.08447e+06	6.2989e+06	4.19309e+06	5.21395e+06	3.48962e+06	3.23587e+06	3.29583e+06	2.46407e+06	2.6291e+06	3.29163e+06	1.10259e+06	1.40317e+06
M285T763	Hexadecanedioate	285.207	762.6	286.214	1.83726	C16H30O4	[M-H]-	Fatty Acyls	Fatty acids and conjugates	C19615	Lipid metabolism; Global and overview maps	505-54-4	HMDB0000672	mzCloud	2	neg	5.09285e+06	5.52234e+06	2.62484e+07	9.26073e+06	8.42315e+06	5.96854e+06	6.14211e+06	8.79272e+06	9.64994e+06	6.52588e+06	8.19732e+06	1.113e+07	8.04935e+06	8.10526e+06	9.81273e+06	1.06423e+07	9.97378e+06	9.15298e+06	9.97124e+06	6.1454e+06	1.11463e+07	8.48679e+06	6.78809e+06	6.62582e+06
