# Supplementary material for: The impact of dapagliflozin for the myocardial metabolomic profiles of mice with chronic heart failure induced by a high fat diet
Source: Research Square preprint supplement (doi:10.21203/rs.3.rs-6881055/v1), 2025-06-25
Supplement: Supplementary file 9 [file 6efb5bd8e8d7debae79217c7.xlsx]

## Sheet: Sheet 1
Pathway_id	Pathway_name	Total	Hits	Up_hits	Down_hits	P value	-Log10(Pvalue)	FDR	Impact	compounds	Compound_name	links
map04977	Vitamin digestion and absorption	39	5	5	0	0.000486407	3.3130005416677	0.164230851646299	0.1282	C00061; C00153; C00378; C00534; C00864	FMN; Niacinamide; Thiamine; Pyridoxamine; Pantothenic acid	http://www.kegg.jp/pathway/map04977+C00061%09red+C00153%09red+C00378%09red+C00534%09red+C00864%09red
map04917	Prolactin signaling pathway	11	3	3	0	0.000729825	3.1367812186633	0.164230851646299	0.2727	C00082; C00410; C03758	L-Tyrosine; Progesterone; Dopamine	http://www.kegg.jp/pathway/map04917+C00082%09red+C00410%09red+C03758%09red
map04721	Synaptic vesicle cycle	12	3	2	1	0.000961015	3.01726997903145	0.164230851646299	0.25	C00334; C01996; C03758	gamma-Aminobutyric acid; Acetylcholine ; Dopamine	http://www.kegg.jp/pathway/map04721+C00334%09red+C01996%09blue+C03758%09red
map00591	Linoleic acid metabolism	28	4	3	1	0.00121428	2.91568252878351	0.164230851646299	0.1429	C00219; C04056; C04717; C14836	Arachidonic acid; Bovinic acid; 13-L-Hydroperoxylinoleic acid; 9,10-12,13-Diepoxyoctadecanoate	http://www.kegg.jp/pathway/map00591+C00219%09red+C04056%09red+C04717%09red+C14836%09blue
map04080	Neuroactive ligand-receptor interaction	52	5	3	2	0.00184098	2.73495179886921	0.171178462236236	0.0962	C00334; C00398; C01996; C02165; C03758	gamma-Aminobutyric acid; Tryptamine; Acetylcholine ; 12-Keto-tetrahydro-leukotriene B4; Dopamine	http://www.kegg.jp/pathway/map04080+C00334%09red+C00398%09blue+C01996%09blue+C02165%09red+C03758%09red
map04742	Taste transduction	32	4	3	1	0.00202348	2.69390084221717	0.171178462236236	0.125	C00149; C00334; C01996; C02265	L-Malic acid; gamma-Aminobutyric acid; Acetylcholine ; D-Phenylalanine	http://www.kegg.jp/pathway/map04742+C00149%09red+C00334%09red+C01996%09blue+C02265%09red
map02010	ABC transporters	137	8	7	1	0.00229275	2.63964337180598	0.171178462236236	0.0584	C00047; C00148; C00378; C00387; C00526; C00559; C01279; C01762	L-Lysine; L-Proline; Thiamine; Guanosine; Deoxyuridine; Deoxyadenosine; 4-Amino-5-hydroxymethyl-2-methylpyrimidine; Xanthosine	http://www.kegg.jp/pathway/map02010+C00047%09red+C00148%09red+C00378%09red+C00387%09red+C00526%09red+C00559%09red+C01279%09red+C01762%09blue
map01060	Biosynthesis of plant secondary metabolites	141	8	5	3	0.00274488	2.56147623627802	0.171178462236236	0.0567	C00047; C00082; C00149; C00170; C00398; C01530; C03758; C08491	L-Lysine; L-Tyrosine; L-Malic acid; 5'-Methylthioadenosine; Tryptamine; Stearic acid; Dopamine; Jasmonic acid	http://www.kegg.jp/pathway/map01060+C00047%09red+C00082%09red+C00149%09red+C00170%09red+C00398%09blue+C01530%09blue+C03758%09red+C08491%09blue
map00380	Tryptophan metabolism	83	6	2	4	0.0028477	2.54550563504793	0.171178462236236	0.0723	C00328; C00398; C00632; C01717; C02700; C05635	L-Kynurenine; Tryptamine; 3-Hydroxyanthranilate; Kynurenic acid; L-Formylkynurenine; 5-Hydroxyindoleacetic acid	http://www.kegg.jp/pathway/map00380+C00328%09blue+C00398%09blue+C00632%09red+C01717%09blue+C02700%09red+C05635%09blue
map00360	Phenylalanine metabolism	60	5	4	1	0.00347247	2.45936187383381	0.171186220490894	0.0833	C00082; C01198; C02265; C05598; C05629	L-Tyrosine; 3-(2-Hydroxyphenyl)propanoic acid; D-Phenylalanine; Phenylacetylglycine; Phenylpropanoate	http://www.kegg.jp/pathway/map00360+C00082%09red+C01198%09red+C02265%09red+C05598%09red+C05629%09blue
map05230	Central carbon metabolism in cancer	37	4	3	1	0.00348068	2.45833577641571	0.171186220490894	0.1081	C00082; C00148; C00149; C00354	L-Tyrosine; L-Proline; L-Malic acid; Fructose 1,6-bisphosphate	http://www.kegg.jp/pathway/map05230+C00082%09red+C00148%09red+C00149%09red+C00354%09blue
map00908	Zeatin biosynthesis	39	4	2	2	0.00422283	2.37439688698129	0.173513683037323	0.1026	C00147; C00170; C00979; C16427	Adenine; 5'-Methylthioadenosine; O-Acetylserine; Isopentenyl adenosine	http://www.kegg.jp/pathway/map00908+C00147%09blue+C00170%09red+C00979%09blue+C16427%09red
map05012	Parkinson disease	21	3	3	0	0.00519393	2.2845042729692	0.173513683037323	0.1429	C00013; C00082; C03758	Pyrophosphate; L-Tyrosine; Dopamine	http://www.kegg.jp/pathway/map05012+C00013%09red+C00082%09red+C03758%09red
map04726	Serotonergic synapse	42	4	3	1	0.00552569	2.25761366227826	0.173513683037323	0.0952	C00219; C02165; C05635; C05954	Arachidonic acid; 12-Keto-tetrahydro-leukotriene B4; 5-Hydroxyindoleacetic acid; Prostaglandin B2	http://www.kegg.jp/pathway/map04726+C00219%09red+C02165%09red+C05635%09blue+C05954%09red
map00230	Purine metabolism	95	6	3	3	0.00556041	2.25489305264595	0.173513683037323	0.0632	C00147; C00362; C00387; C00559; C01367; C01762	Adenine; dGMP; Guanosine; Deoxyadenosine; 3'-AMP; Xanthosine	http://www.kegg.jp/pathway/map00230+C00147%09blue+C00362%09blue+C00387%09red+C00559%09red+C01367%09red+C01762%09blue
map05030	Cocaine addiction	7	2	2	0	0.0057731	2.23859103169313	0.173513683037323	0.2857	C00082; C03758	L-Tyrosine; Dopamine	http://www.kegg.jp/pathway/map05030+C00082%09red+C03758%09red
map05033	Nicotine addiction	7	2	1	1	0.0057731	2.23859103169313	0.173513683037323	0.2857	C00334; C01996	gamma-Aminobutyric acid; Acetylcholine	http://www.kegg.jp/pathway/map05033+C00334%09red+C01996%09blue
map07034	Eicosanoids	7	2	2	0	0.0057731	2.23859103169313	0.173513683037323	0.2857	C00219; C02165	Arachidonic acid; 12-Keto-tetrahydro-leukotriene B4	http://www.kegg.jp/pathway/map07034+C00219%09red+C02165%09red
map05032	Morphine addiction	8	2	2	0	0.00761174	2.11851608133409	0.216734267740466	0.25	C00334; C03758	gamma-Aminobutyric acid; Dopamine	http://www.kegg.jp/pathway/map05032+C00334%09red+C03758%09red
map04024	cAMP signaling pathway	25	3	2	1	0.00854776	2.06814782319619	0.231216831897942	0.12	C00334; C01996; C03758	gamma-Aminobutyric acid; Acetylcholine ; Dopamine	http://www.kegg.jp/pathway/map04024+C00334%09red+C01996%09blue+C03758%09red
map01240	Biosynthesis of cofactors	324	12	9	3	0.00904639	2.04352477950564	0.233052191340488	0.037	C00021; C00061; C00082; C00153; C00328; C00378; C00593; C00632; C00669; C00864; C01279; C02700	S-Adenosylhomocysteine; FMN; L-Tyrosine; Niacinamide; L-Kynurenine; Thiamine; Sulfoacetaldehyde; 3-Hydroxyanthranilate; gamma-Glutamylcysteine; Pantothenic acid; 4-Amino-5-hydroxymethyl-2-methylpyrimidine; L-Formylkynurenine	http://www.kegg.jp/pathway/map01240+C00021%09blue+C00061%09red+C00082%09red+C00153%09red+C00328%09blue+C00378%09red+C00593%09red+C00632%09red+C00669%09blue+C00864%09red+C01279%09red+C02700%09red
map05031	Amphetamine addiction	9	2	2	0	0.00967768	2.01422891804885	0.237982852770574	0.2222	C00082; C03758	L-Tyrosine; Dopamine	http://www.kegg.jp/pathway/map05031+C00082%09red+C03758%09red
map05034	Alcoholism	10	2	2	0	0.0119627	1.92216971194112	0.281384206108152	0.2	C00082; C03758	L-Tyrosine; Dopamine	http://www.kegg.jp/pathway/map05034+C00082%09red+C03758%09red
map04122	Sulfur relay system	11	2	1	1	0.0144589	1.8398638248161	0.291367257477293	0.1818	C00378; C00979	Thiamine; O-Acetylserine	http://www.kegg.jp/pathway/map04122+C00378%09red+C00979%09blue
map04745	Phototransduction - fly	11	2	1	1	0.0144589	1.8398638248161	0.291367257477293	0.1818	C00219; C01530	Arachidonic acid; Stearic acid	http://www.kegg.jp/pathway/map04745+C00219%09red+C01530%09blue
map05231	Choline metabolism in cancer	11	2	2	0	0.0144589	1.8398638248161	0.291367257477293	0.1818	C00307; C00588	Citicoline; Phosphorylcholine	http://www.kegg.jp/pathway/map05231+C00307%09red+C00588%09red
map00730	Thiamine metabolism	31	3	3	0	0.0155132	1.80929750853967	0.291367257477293	0.0968	C00082; C00378; C01279	L-Tyrosine; Thiamine; 4-Amino-5-hydroxymethyl-2-methylpyrimidine	http://www.kegg.jp/pathway/map00730+C00082%09red+C00378%09red+C01279%09red
map05200	Pathways in cancer	31	3	3	0	0.0155132	1.80929750853967	0.291367257477293	0.0968	C00149; C00410; C00777	L-Malic acid; Progesterone; all-trans-Retinoic acid	http://www.kegg.jp/pathway/map05200+C00149%09red+C00410%09red+C00777%09red
map00680	Methane metabolism	86	5	3	2	0.0156186	1.80635852106358	0.291367257477293	0.0581	C00082; C00149; C00227; C00354; C00593	L-Tyrosine; L-Malic acid; Acetylphosphate; Fructose 1,6-bisphosphate; Sulfoacetaldehyde	http://www.kegg.jp/pathway/map00680+C00082%09red+C00149%09red+C00227%09blue+C00354%09blue+C00593%09red
map04728	Dopaminergic synapse	12	2	2	0	0.0171585	1.76552033005341	0.309425200006647	0.1667	C00082; C03758	L-Tyrosine; Dopamine	http://www.kegg.jp/pathway/map04728+C00082%09red+C03758%09red
map00400	Phenylalanine, tyrosine and tryptophan biosynthesis	34	3	2	1	0.0199043	1.7010528232202	0.347362353049349	0.0882	C00082; C00354; C00826	L-Tyrosine; Fructose 1,6-bisphosphate; L-Arogenate	http://www.kegg.jp/pathway/map00400+C00082%09red+C00354%09blue+C00826%09red
map01230	Biosynthesis of amino acids	128	6	4	2	0.022109	1.65543137826846	0.367043636024949	0.0469	C00021; C00047; C00082; C00148; C00826; C00979	S-Adenosylhomocysteine; L-Lysine; L-Tyrosine; L-Proline; L-Arogenate; O-Acetylserine	http://www.kegg.jp/pathway/map01230+C00021%09blue+C00047%09red+C00082%09red+C00148%09red+C00826%09red+C00979%09blue
map00270	Cysteine and methionine metabolism	63	4	1	3	0.022389	1.64996562675775	0.367043636024949	0.0635	C00021; C00170; C00979; C03145	S-Adenosylhomocysteine; 5'-Methylthioadenosine; O-Acetylserine; N-Formyl-L-methionine	http://www.kegg.jp/pathway/map00270+C00021%09blue+C00170%09red+C00979%09blue+C03145%09blue
map01100	Metabolic pathways	2827	59	42	17	0.0240697	1.61852885908561	0.382991811746933	0.0209	C00021; C00047; C00061; C00082; C00128; C00147; C00148; C00149; C00153; C00170; C00214; C00219; C00227; C00300; C00307; C00328; C00334; C00354; C00362; C00378; C00387; C00398; C00410; C00455; C00526; C00530; C00534; C00559; C00588; C00593; C00632; C00669; C00777; C00785; C00826; C00864; C00979; C01132; C01198; C01279; C01367; C01717; C01762; C02165; C02265; C02700; C03740; C03758; C04717; C05580;…	S-Adenosylhomocysteine; L-Lysine; FMN; L-Tyrosine; Cytidine monophosphate N-acetylneuraminic acid; Adenine; L-Proline; L-Malic acid; Niacinamide; 5'-Methylthioadenosine; Thymidine; Arachidonic acid; Acetylphosphate; Creatine; Citicoline; L-Kynurenine; gamma-Aminobutyric acid; Fructose 1,6-bisphosphate; dGMP; Thiamine; Guanosine; Tryptamine; Progesterone; Nicotinamide ribotide; Deoxyuridine; Hydro…	http://www.kegg.jp/pathway/map01100+C00021%09blue+C00047%09red+C00061%09red+C00082%09red+C00128%09red+C00147%09blue+C00148%09red+C00149%09red+C00153%09red+C00170%09red+C00214%09red+C00219%09red+C00227%09blue+C00300%09red+C00307%09red+C00328%09blue+C00334%09red+C00354%09blue+C00362%09blue+C00378%09red+C00387%09red+C00398%09blue+C00410%09red+C00455%09red+C00526%09red+C00530%09blue+C00534%09red+C005…
map04976	Bile secretion	97	5	4	1	0.02496	1.60275622084496	0.385809573377918	0.0515	C00318; C01996; C02165; C03758; C03990	L-Carnitine; Acetylcholine ; 12-Keto-tetrahydro-leukotriene B4; Dopamine; Lithocholic acid	http://www.kegg.jp/pathway/map04976+C00318%09red+C01996%09blue+C02165%09red+C03758%09red+C03990%09red
map00190	Oxidative phosphorylation	16	2	2	0	0.0298423	1.52516827387441	0.448462868492276	0.125	C00013; C00061	Pyrophosphate; FMN	http://www.kegg.jp/pathway/map00190+C00013%09red+C00061%09red
map04672	Intestinal immune network for IgA production	2	1	1	0	0.0339746	1.46884580114839	0.496763570462109	0.5	C00777	all-trans-Retinoic acid	http://www.kegg.jp/pathway/map04672+C00777%09red
map00590	Arachidonic acid metabolism	75	4	4	0	0.0391494	1.40727538972384	0.5573631843544	0.0533	C00219; C02165; C05954; C14749	Arachidonic acid; 12-Keto-tetrahydro-leukotriene B4; Prostaglandin B2; 19(S)-HETE	http://www.kegg.jp/pathway/map00590+C00219%09red+C02165%09red+C05954%09red+C14749%09red
map04723	Retrograde endocannabinoid signaling	19	2	2	0	0.0411389	1.38574778745781	0.570669774306411	0.1053	C00219; C00334	Arachidonic acid; gamma-Aminobutyric acid	http://www.kegg.jp/pathway/map04723+C00219%09red+C00334%09red
map00350	Tyrosine metabolism	78	4	3	1	0.0442129	1.35445124059262	0.597979138528831	0.0513	C00082; C00530; C03758; C05580	L-Tyrosine; Hydroquinone; Dopamine; 3,4-Dihydroxymandelic acid	http://www.kegg.jp/pathway/map00350+C00082%09red+C00530%09blue+C03758%09red+C05580%09red
map04974	Protein digestion and absorption	47	3	3	0	0.046018	1.33707190216877	0.607213622592451	0.0638	C00047; C00082; C00148	L-Lysine; L-Tyrosine; L-Proline	http://www.kegg.jp/pathway/map04974+C00047%09red+C00082%09red+C00148%09red
map05211	Renal cell carcinoma	3	1	1	0	0.0505306	1.29644587920142	0.621296217237626	0.3333	C00149	L-Malic acid	http://www.kegg.jp/pathway/map05211+C00149%09red
map05222	Small cell lung cancer	3	1	1	0	0.0505306	1.29644587920142	0.621296217237626	0.3333	C00777	all-trans-Retinoic acid	http://www.kegg.jp/pathway/map05222+C00777%09red
map05224	Breast cancer	3	1	1	0	0.0505306	1.29644587920142	0.621296217237626	0.3333	C00410	Progesterone	http://www.kegg.jp/pathway/map05224+C00410%09red
map00430	Taurine and hypotaurine metabolism	22	2	1	1	0.0537692	1.26946611463898	0.632372999863408	0.0909	C00227; C00593	Acetylphosphate; Sulfoacetaldehyde	http://www.kegg.jp/pathway/map00430+C00227%09blue+C00593%09red
map04925	Aldosterone synthesis and secretion	22	2	2	0	0.0537692	1.26946611463898	0.632372999863408	0.0909	C00219; C00410	Arachidonic acid; Progesterone	http://www.kegg.jp/pathway/map04925+C00219%09red+C00410%09red
map00710	Carbon fixation in photosynthetic organisms	23	2	1	1	0.0582476	1.23472217978558	0.641464118833414	0.087	C00149; C00354	L-Malic acid; Fructose 1,6-bisphosphate	http://www.kegg.jp/pathway/map00710+C00149%09red+C00354%09blue
map00564	Glycerophospholipid metabolism	52	3	2	1	0.0590326	1.2289080958463	0.641464118833414	0.0577	C00307; C00588; C01996	Citicoline; Phosphorylcholine; Acetylcholine	http://www.kegg.jp/pathway/map00564+C00307%09red+C00588%09red+C01996%09blue
map00970	Aminoacyl-tRNA biosynthesis	52	3	3	0	0.0590326	1.2289080958463	0.641464118833414	0.0577	C00047; C00082; C00148	L-Lysine; L-Tyrosine; L-Proline	http://www.kegg.jp/pathway/map00970+C00047%09red+C00082%09red+C00148%09red
map00965	Betalain biosynthesis	24	2	2	0	0.0628505	1.20169146547966	0.641464118833414	0.0833	C00082; C03758	L-Tyrosine; Dopamine	http://www.kegg.jp/pathway/map00965+C00082%09red+C03758%09red
map04913	Ovarian steroidogenesis	24	2	2	0	0.0628505	1.20169146547966	0.641464118833414	0.0833	C00219; C00410	Arachidonic acid; Progesterone	http://www.kegg.jp/pathway/map04913+C00219%09red+C00410%09red
map04114	Oocyte meiosis	4	1	1	0	0.0668054	1.17518826646704	0.641464118833414	0.25	C00410	Progesterone	http://www.kegg.jp/pathway/map04114+C00410%09red
map04659	Th17 cell differentiation	4	1	1	0	0.0668054	1.17518826646704	0.641464118833414	0.25	C00777	all-trans-Retinoic acid	http://www.kegg.jp/pathway/map04659+C00777%09red
map04914	Progesterone-mediated oocyte maturation	4	1	1	0	0.0668054	1.17518826646704	0.641464118833414	0.25	C00410	Progesterone	http://www.kegg.jp/pathway/map04914+C00410%09red
map05226	Gastric cancer	4	1	1	0	0.0668054	1.17518826646704	0.641464118833414	0.25	C00777	all-trans-Retinoic acid	http://www.kegg.jp/pathway/map05226+C00777%09red
map07225	Glucocorticoid and mineralocorticoid receptor agonists/antagonists	4	1	1	0	0.0668054	1.17518826646704	0.641464118833414	0.25	C00410	Progesterone	http://www.kegg.jp/pathway/map07225+C00410%09red
map00760	Nicotinate and nicotinamide metabolism	55	3	3	0	0.0675849	1.17015004089534	0.641464118833414	0.0545	C00153; C00334; C00455	Niacinamide; gamma-Aminobutyric acid; Nicotinamide ribotide	http://www.kegg.jp/pathway/map00760+C00153%09red+C00334%09red+C00455%09red
map00997	Biosynthesis of various secondary metabolites - part 3	56	3	2	1	0.070555	1.15147200594827	0.658108144645783	0.0536	C00047; C00061; C00979	L-Lysine; FMN; O-Acetylserine	http://www.kegg.jp/pathway/map00997+C00047%09red+C00061%09red+C00979%09blue
map04922	Glucagon signaling pathway	26	2	1	1	0.0724082	1.14021252808263	0.663945948907115	0.0769	C00149; C00354	L-Malic acid; Fructose 1,6-bisphosphate	http://www.kegg.jp/pathway/map04922+C00149%09red+C00354%09blue
map03320	PPAR signaling pathway	5	1	1	0	0.0828039	1.08194916013272	0.711062139945141	0.2	C02165	12-Keto-tetrahydro-leukotriene B4	http://www.kegg.jp/pathway/map03320+C02165%09red
map04810	Regulation of actin cytoskeleton	5	1	0	1	0.0828039	1.08194916013272	0.711062139945141	0.2	C01996	Acetylcholine	http://www.kegg.jp/pathway/map04810+C01996%09blue
map07216	Catecholamine transferase inhibitors	5	1	1	0	0.0828039	1.08194916013272	0.711062139945141	0.2	C01108	1,2,3-Trihydroxybenzene	http://www.kegg.jp/pathway/map07216+C01108%09red
map07226	Progesterone, androgen and estrogen receptor agonists/antagonists	5	1	1	0	0.0828039	1.08194916013272	0.711062139945141	0.2	C00410	Progesterone	http://www.kegg.jp/pathway/map07226+C00410%09red
map04216	Ferroptosis	29	2	1	1	0.0875464	1.05776172041217	0.740040641109316	0.069	C00219; C00669	Arachidonic acid; gamma-Glutamylcysteine	http://www.kegg.jp/pathway/map04216+C00219%09red+C00669%09blue
map00620	Pyruvate metabolism	31	2	1	1	0.0981156	1.00826173953832	0.761501258088742	0.0645	C00149; C00227	L-Malic acid; Acetylphosphate	http://www.kegg.jp/pathway/map00620+C00149%09red+C00227%09blue
map01063	Biosynthesis of alkaloids derived from shikimate pathway	143	5	3	2	0.0981255	1.00821832921358	0.761501258088742	0.035	C00082; C00149; C00398; C03758; C06161	L-Tyrosine; L-Malic acid; Tryptamine; Dopamine; (S)-Coclaurine	http://www.kegg.jp/pathway/map01063+C00082%09red+C00149%09red+C00398%09blue+C03758%09red+C06161%09blue
map04912	GnRH signaling pathway	6	1	1	0	0.0985307	1.00642859991461	0.761501258088742	0.1667	C00219	Arachidonic acid	http://www.kegg.jp/pathway/map04912+C00219%09red
map04916	Melanogenesis	6	1	1	0	0.0985307	1.00642859991461	0.761501258088742	0.1667	C00082	L-Tyrosine	http://www.kegg.jp/pathway/map04916+C00082%09red
map05140	Leishmaniasis	6	1	1	0	0.0985307	1.00642859991461	0.761501258088742	0.1667	C00219	Arachidonic acid	http://www.kegg.jp/pathway/map05140+C00219%09red
map05223	Non-small cell lung cancer	6	1	1	0	0.0985307	1.00642859991461	0.761501258088742	0.1667	C00777	all-trans-Retinoic acid	http://www.kegg.jp/pathway/map05223+C00777%09red
map00401	Novobiocin biosynthesis	32	2	2	0	0.103529	0.984936141102668	0.767252414636453	0.0625	C00082; C00148	L-Tyrosine; L-Proline	http://www.kegg.jp/pathway/map00401+C00082%09red+C00148%09red
map00410	beta-Alanine metabolism	32	2	2	0	0.103529	0.984936141102668	0.767252414636453	0.0625	C00334; C00864	gamma-Aminobutyric acid; Pantothenic acid	http://www.kegg.jp/pathway/map00410+C00334%09red+C00864%09red
map05022	Pathways of neurodegeneration - multiple diseases	32	2	1	1	0.103529	0.984936141102668	0.767252414636453	0.0625	C00013; C01996	Pyrophosphate; Acetylcholine	http://www.kegg.jp/pathway/map05022+C00013%09red+C01996%09blue
map01065	Biosynthesis of alkaloids derived from histidine and purine	35	2	1	1	0.120235	0.919968643189686	0.867296030178695	0.0571	C00149; C01762	L-Malic acid; Xanthosine	http://www.kegg.jp/pathway/map01065+C00149%09red+C01762%09blue
map04750	Inflammatory mediator regulation of TRP channels	35	2	2	0	0.120235	0.919968643189686	0.867296030178695	0.0571	C00219; C02165	Arachidonic acid; 12-Keto-tetrahydro-leukotriene B4	http://www.kegg.jp/pathway/map04750+C00219%09red+C02165%09red
map04666	Fc gamma R-mediated phagocytosis	8	1	1	0	0.129187	0.88878055946491	0.896029076565348	0.125	C00219	Arachidonic acid	http://www.kegg.jp/pathway/map04666+C00219%09red
map04915	Estrogen signaling pathway	8	1	1	0	0.129187	0.88878055946491	0.896029076565348	0.125	C00334	gamma-Aminobutyric acid	http://www.kegg.jp/pathway/map04915+C00334%09red
map05143	African trypanosomiasis	8	1	0	1	0.129187	0.88878055946491	0.896029076565348	0.125	C00328	L-Kynurenine	http://www.kegg.jp/pathway/map05143+C00328%09blue
map01200	Carbon metabolism	114	4	1	3	0.131162	0.882191540434181	0.898211546020923	0.0351	C00149; C00227; C00354; C00979	L-Malic acid; Acetylphosphate; Fructose 1,6-bisphosphate; O-Acetylserine	http://www.kegg.jp/pathway/map01200+C00149%09red+C00227%09blue+C00354%09blue+C00979%09blue
map01040	Biosynthesis of unsaturated fatty acids	74	3	2	1	0.133071	0.875915005661163	0.899895898579792	0.0405	C00219; C01530; C06425	Arachidonic acid; Stearic acid; Arachidic acid	http://www.kegg.jp/pathway/map01040+C00219%09red+C01530%09blue+C06425%09red
map00480	Glutathione metabolism	38	2	1	1	0.137551	0.861535339501615	0.918706748845311	0.0526	C00669; C03740	gamma-Glutamylcysteine; gamma-Glutamylalanine	http://www.kegg.jp/pathway/map00480+C00669%09blue+C03740%09red
map04727	GABAergic synapse	9	1	1	0	0.144126	0.841258041667788	0.928239269327264	0.1111	C00334	gamma-Aminobutyric acid	http://www.kegg.jp/pathway/map04727+C00334%09red
map04730	Long-term depression	9	1	1	0	0.144126	0.841258041667788	0.928239269327264	0.1111	C00219	Arachidonic acid	http://www.kegg.jp/pathway/map04730+C00219%09red
map04929	GnRH secretion	9	1	1	0	0.144126	0.841258041667788	0.928239269327264	0.1111	C00334	gamma-Aminobutyric acid	http://www.kegg.jp/pathway/map04929+C00334%09red
map00330	Arginine and proline metabolism	78	3	3	0	0.148958	0.826936964198658	0.948072119448186	0.0385	C00148; C00300; C00334	L-Proline; Creatine; gamma-Aminobutyric acid	http://www.kegg.jp/pathway/map00330+C00148%09red+C00300%09red+C00334%09red
map04212	Longevity regulating pathway - worm	10	1	1	0	0.158811	0.799120323555885	0.987546806506275	0.1	C00153	Niacinamide	http://www.kegg.jp/pathway/map04212+C00153%09red
map04217	Necroptosis	10	1	1	0	0.158811	0.799120323555885	0.987546806506275	0.1	C00219	Arachidonic acid	http://www.kegg.jp/pathway/map04217+C00219%09red
map04540	Gap junction	11	1	1	0	0.173246	0.761337176611399	1	0.0909	C03758	Dopamine	http://www.kegg.jp/pathway/map04540+C03758%09red
map04664	Fc epsilon RI signaling pathway	11	1	1	0	0.173246	0.761337176611399	1	0.0909	C00219	Arachidonic acid	http://www.kegg.jp/pathway/map04664+C00219%09red
map05215	Prostate cancer	11	1	1	0	0.173246	0.761337176611399	1	0.0909	C00410	Progesterone	http://www.kegg.jp/pathway/map05215+C00410%09red
map00720	Carbon fixation pathways in prokaryotes	44	2	1	1	0.173612	0.76041961778912	1	0.0455	C00149; C00227	L-Malic acid; Acetylphosphate	http://www.kegg.jp/pathway/map00720+C00149%09red+C00227%09blue
map00627	Aminobenzoate degradation	86	3	2	1	0.182406	0.738960870922636	1	0.0349	C00530; C00632; C01108	Hydroquinone; 3-Hydroxyanthranilate; 1,2,3-Trihydroxybenzene	http://www.kegg.jp/pathway/map00627+C00530%09blue+C00632%09red+C01108%09red
map04075	Plant hormone signal transduction	12	1	0	1	0.187436	0.727147917989716	1	0.0833	C08491	Jasmonic acid	http://www.kegg.jp/pathway/map04075+C08491%09blue
map04725	Cholinergic synapse	12	1	0	1	0.187436	0.727147917989716	1	0.0833	C01996	Acetylcholine	http://www.kegg.jp/pathway/map04725+C01996%09blue
map04911	Insulin secretion	12	1	0	1	0.187436	0.727147917989716	1	0.0833	C01996	Acetylcholine	http://www.kegg.jp/pathway/map04911+C01996%09blue
map04921	Oxytocin signaling pathway	12	1	1	0	0.187436	0.727147917989716	1	0.0833	C00219	Arachidonic acid	http://www.kegg.jp/pathway/map04921+C00219%09red
map04927	Cortisol synthesis and secretion	12	1	1	0	0.187436	0.727147917989716	1	0.0833	C00410	Progesterone	http://www.kegg.jp/pathway/map04927+C00410%09red
map04934	Cushing syndrome	13	1	1	0	0.201384	0.695974876663808	1	0.0769	C00410	Progesterone	http://www.kegg.jp/pathway/map04934+C00410%09red
map05146	Amoebiasis	13	1	1	0	0.201384	0.695974876663808	1	0.0769	C00219	Arachidonic acid	http://www.kegg.jp/pathway/map05146+C00219%09red
map04611	Platelet activation	14	1	1	0	0.215095	0.667369019825506	1	0.0714	C00219	Arachidonic acid	http://www.kegg.jp/pathway/map04611+C00219%09red
map04923	Regulation of lipolysis in adipocytes	14	1	1	0	0.215095	0.667369019825506	1	0.0714	C00219	Arachidonic acid	http://www.kegg.jp/pathway/map04923+C00219%09red
map04971	Gastric acid secretion	14	1	0	1	0.215095	0.667369019825506	1	0.0714	C01996	Acetylcholine	http://www.kegg.jp/pathway/map04971+C01996%09blue
map04972	Pancreatic secretion	15	1	0	1	0.228573	0.640974383837711	1	0.0667	C01996	Acetylcholine	http://www.kegg.jp/pathway/map04972+C01996%09blue
map04270	Vascular smooth muscle contraction	16	1	1	0	0.241822	0.616504008062876	1	0.0625	C00219	Arachidonic acid	http://www.kegg.jp/pathway/map04270+C00219%09red
map04964	Proximal tubule bicarbonate reclamation	17	1	1	0	0.254845	0.593723177503222	1	0.0588	C00149	L-Malic acid	http://www.kegg.jp/pathway/map04964+C00149%09red
map04970	Salivary secretion	17	1	0	1	0.254845	0.593723177503222	1	0.0588	C01996	Acetylcholine	http://www.kegg.jp/pathway/map04970+C01996%09blue
map00333	Prodigiosin biosynthesis	18	1	1	0	0.267647	0.572437462501824	1	0.0556	C00148	L-Proline	http://www.kegg.jp/pathway/map00333+C00148%09red
map00984	Steroid degradation	18	1	1	0	0.267647	0.572437462501824	1	0.0556	C07635	Epiandrosterone	http://www.kegg.jp/pathway/map00984+C07635%09red
map01055	Biosynthesis of vancomycin group antibiotics	19	1	1	0	0.280231	0.552483996482425	1	0.0526	C00082	L-Tyrosine	http://www.kegg.jp/pathway/map01055+C00082%09red
map00020	Citrate cycle (TCA cycle)	20	1	1	0	0.2926	0.533724993575057	1	0.05	C00149	L-Malic acid	http://www.kegg.jp/pathway/map00020+C00149%09red
map00740	Riboflavin metabolism	20	1	1	0	0.2926	0.533724993575057	1	0.05	C00061	FMN	http://www.kegg.jp/pathway/map00740+C00061%09red
map01059	Biosynthesis of enediyne antibiotics	63	2	2	0	0.293766	0.531998554243728	1	0.0317	C00082; C18054	L-Tyrosine; 2-Amino-2-deoxyisochorismate	http://www.kegg.jp/pathway/map01059+C00082%09red+C18054%09red
map00943	Isoflavonoid biosynthesis	64	2	1	1	0.300135	0.522683930882189	1	0.0312	C00858; C10216	Formononetin; Daidzin	http://www.kegg.jp/pathway/map00943+C00858%09blue+C10216%09red
map00240	Pyrimidine metabolism	65	2	2	0	0.306494	0.513577366111421	1	0.0308	C00214; C00526	Thymidine; Deoxyuridine	http://www.kegg.jp/pathway/map00240+C00214%09red+C00526%09red
map00232	Caffeine metabolism	22	1	0	1	0.316711	0.49933638302017	1	0.0455	C01762	Xanthosine	http://www.kegg.jp/pathway/map00232+C01762%09blue
map04152	AMPK signaling pathway	22	1	0	1	0.316711	0.49933638302017	1	0.0455	C00354	Fructose 1,6-bisphosphate	http://www.kegg.jp/pathway/map04152+C00354%09blue
map01064	Biosynthesis of alkaloids derived from ornithine, lysine and nicotinic acid	67	2	2	0	0.319182	0.495962132789999	1	0.0299	C00047; C00149	L-Lysine; L-Malic acid	http://www.kegg.jp/pathway/map01064+C00047%09red+C00149%09red
map01070	Biosynthesis of plant hormones	68	2	1	1	0.325506	0.48744106062115	1	0.0294	C00149; C08491	L-Malic acid; Jasmonic acid	http://www.kegg.jp/pathway/map01070+C00149%09red+C08491%09blue
map04714	Thermogenesis	23	1	1	0	0.32846	0.483517913963638	1	0.0435	C00318	L-Carnitine	http://www.kegg.jp/pathway/map04714+C00318%09red
map00950	Isoquinoline alkaloid biosynthesis	122	3	2	1	0.348115	0.45827743846185	1	0.0246	C00082; C03758; C06161	L-Tyrosine; Dopamine; (S)-Coclaurine	http://www.kegg.jp/pathway/map00950+C00082%09red+C03758%09red+C06161%09blue
map00363	Bisphenol degradation	25	1	0	1	0.351359	0.454248422010568	1	0.04	C00530	Hydroquinone	http://www.kegg.jp/pathway/map00363+C00530%09blue
map00830	Retinol metabolism	25	1	1	0	0.351359	0.454248422010568	1	0.04	C00777	all-trans-Retinoic acid	http://www.kegg.jp/pathway/map00830+C00777%09red
map00254	Aflatoxin biosynthesis	27	1	0	1	0.373485	0.427726443181012	1	0.037	C16754	Aflatoxin G2	http://www.kegg.jp/pathway/map00254+C16754%09blue
map00250	Alanine, aspartate and glutamate metabolism	28	1	1	0	0.384266	0.415367733275633	1	0.0357	C00334	gamma-Aminobutyric acid	http://www.kegg.jp/pathway/map00250+C00334%09red
map00780	Biotin metabolism	28	1	1	0	0.384266	0.415367733275633	1	0.0357	C00047	L-Lysine	http://www.kegg.jp/pathway/map00780+C00047%09red
map00522	Biosynthesis of 12-, 14- and 16-membered macrolides	79	2	2	0	0.393831	0.404690040217009	1	0.0253	C11964; C11970	Avermectin A1b aglycone; 5-Oxoavermectin ''2a'' aglycone	http://www.kegg.jp/pathway/map00522+C11964%09red+C11970%09red
map00750	Vitamin B6 metabolism	29	1	1	0	0.394863	0.403553108179511	1	0.0345	C00534	Pyridoxamine	http://www.kegg.jp/pathway/map00750+C00534%09red
map04978	Mineral absorption	29	1	1	0	0.394863	0.403553108179511	1	0.0345	C00148	L-Proline	http://www.kegg.jp/pathway/map04978+C00148%09red
map00770	Pantothenate and CoA biosynthesis	30	1	1	0	0.40528	0.392244981060301	1	0.0333	C00864	Pantothenic acid	http://www.kegg.jp/pathway/map00770+C00864%09red
map00405	Phenazine biosynthesis	31	1	1	0	0.415519	0.381409464261773	1	0.0323	C18054	2-Amino-2-deoxyisochorismate	http://www.kegg.jp/pathway/map00405+C18054%09red
map00332	Carbapenem biosynthesis	32	1	1	0	0.425583	0.371015899395281	1	0.0312	C00148	L-Proline	http://www.kegg.jp/pathway/map00332+C00148%09red
map00920	Sulfur metabolism	33	1	0	1	0.435475	0.361036459761884	1	0.0303	C00979	O-Acetylserine	http://www.kegg.jp/pathway/map00920+C00979%09blue
map00982	Drug metabolism - cytochrome P450	87	2	2	0	0.441563	0.355007240062215	1	0.023	C16587; C16651	3-Carbamoyl-2-phenylpropionaldehyde; 3-Hydroxyvalproic acid	http://www.kegg.jp/pathway/map00982+C16587%09red+C16651%09red
map00300	Lysine biosynthesis	35	1	1	0	0.454757	0.342220827628639	1	0.0286	C00047	L-Lysine	http://www.kegg.jp/pathway/map00300+C00047%09red
map00121	Secondary bile acid biosynthesis	36	1	1	0	0.464151	0.333340333192182	1	0.0278	C03990	Lithocholic acid	http://www.kegg.jp/pathway/map00121+C03990%09red
map00261	Monobactam biosynthesis	39	1	1	0	0.491384	0.308579092025282	1	0.0256	C00082	L-Tyrosine	http://www.kegg.jp/pathway/map00261+C00082%09red
map00650	Butanoate metabolism	42	1	1	0	0.517245	0.286303889854234	1	0.0238	C00334	gamma-Aminobutyric acid	http://www.kegg.jp/pathway/map00650+C00334%09red
map01061	Biosynthesis of phenylpropanoids	103	2	1	1	0.53048	0.27533127898506	1	0.0194	C00149; C00858	L-Malic acid; Formononetin	http://www.kegg.jp/pathway/map01061+C00149%09red+C00858%09blue
map00592	alpha-Linolenic acid metabolism	44	1	0	1	0.533757	0.272656158470418	1	0.0227	C08491	Jasmonic acid	http://www.kegg.jp/pathway/map00592+C08491%09blue
map00460	Cyanoamino acid metabolism	45	1	1	0	0.541803	0.266158973863047	1	0.0222	C00082	L-Tyrosine	http://www.kegg.jp/pathway/map00460+C00082%09red
map00052	Galactose metabolism	46	1	1	0	0.54971	0.2598662040732	1	0.0217	C01132	N-Acetyl-D-galactosamine	http://www.kegg.jp/pathway/map00052+C01132%09red
map00340	Histidine metabolism	47	1	1	0	0.557483	0.253768630653459	1	0.0213	C00785	Urocanic acid	http://www.kegg.jp/pathway/map00340+C00785%09red
map00404	Staurosporine biosynthesis	48	1	1	0	0.565122	0.24785761834547	1	0.0208	C00148	L-Proline	http://www.kegg.jp/pathway/map00404+C00148%09red
map01066	Biosynthesis of alkaloids derived from terpenoid and polyketide	48	1	1	0	0.565122	0.24785761834547	1	0.0208	C00149	L-Malic acid	http://www.kegg.jp/pathway/map01066+C00149%09red
map00260	Glycine, serine and threonine metabolism	50	1	1	0	0.580012	0.236563368330192	1	0.02	C00300	Creatine	http://www.kegg.jp/pathway/map00260+C00300%09red
map00310	Lysine degradation	50	1	1	0	0.580012	0.236563368330192	1	0.02	C00047	L-Lysine	http://www.kegg.jp/pathway/map00310+C00047%09red
map02020	Two-component system	53	1	1	0	0.601404	0.220833892052691	1	0.0189	C00149	L-Malic acid	http://www.kegg.jp/pathway/map02020+C00149%09red
map02024	Quorum sensing	55	1	1	0	0.615062	0.211081202608915	1	0.0182	C00334	gamma-Aminobutyric acid	http://www.kegg.jp/pathway/map02024+C00334%09red
map00440	Phosphonate and phosphinate metabolism	56	1	1	0	0.621716	0.20640792647959	1	0.0179	C05683	Ciliatocholate	http://www.kegg.jp/pathway/map00440+C05683%09red
map02060	Phosphotransferase system (PTS)	57	1	1	0	0.628256	0.201863172769565	1	0.0175	C01132	N-Acetyl-D-galactosamine	http://www.kegg.jp/pathway/map02060+C01132%09red
map00061	Fatty acid biosynthesis	58	1	0	1	0.634684	0.197442135859993	1	0.0172	C01530	Stearic acid	http://www.kegg.jp/pathway/map00061+C01530%09blue
map00790	Folate biosynthesis	58	1	0	1	0.634684	0.197442135859993	1	0.0172	C02587	Pyrimidodiazepine	http://www.kegg.jp/pathway/map00790+C02587%09blue
map00630	Glyoxylate and dicarboxylate metabolism	62	1	1	0	0.659315	0.180907362786131	1	0.0161	C00149	L-Malic acid	http://www.kegg.jp/pathway/map00630+C00149%09red
map01210	2-Oxocarboxylic acid metabolism	134	2	2	0	0.674015	0.1713305634744	1	0.0149	C00047; C00082	L-Lysine; L-Tyrosine	http://www.kegg.jp/pathway/map01210+C00047%09red+C00082%09red
map00940	Phenylpropanoid biosynthesis	68	1	1	0	0.693208	0.159136593017208	1	0.0147	C00082	L-Tyrosine	http://www.kegg.jp/pathway/map00940+C00082%09red
map00960	Tropane, piperidine and pyridine alkaloid biosynthesis	68	1	1	0	0.693208	0.159136593017208	1	0.0147	C00047	L-Lysine	http://www.kegg.jp/pathway/map00960+C00047%09red
map00901	Indole alkaloid biosynthesis	70	1	0	1	0.703746	0.152584236205901	1	0.0143	C00398	Tryptamine	http://www.kegg.jp/pathway/map00901+C00398%09blue
map00362	Benzoate degradation	72	1	0	1	0.713925	0.146347400221225	1	0.0139	C00530	Hydroquinone	http://www.kegg.jp/pathway/map00362+C00530%09blue
map00966	Glucosinolate biosynthesis	77	1	1	0	0.737882	0.132012805229349	1	0.013	C00082	L-Tyrosine	http://www.kegg.jp/pathway/map00966+C00082%09red
map00998	Biosynthesis of various secondary metabolites - part 2	81	1	1	0	0.755608	0.121703270538826	1	0.0123	C00082	L-Tyrosine	http://www.kegg.jp/pathway/map00998+C00082%09red
map00361	Chlorocyclohexane and chlorobenzene degradation	83	1	0	1	0.764021	0.116894923517346	1	0.012	C00530	Hydroquinone	http://www.kegg.jp/pathway/map00361+C00530%09blue
map00541	O-Antigen nucleotide sugar biosynthesis	87	1	1	0	0.779994	0.107908664762599	1	0.0115	C00128	Cytidine monophosphate N-acetylneuraminic acid	http://www.kegg.jp/pathway/map00541+C00128%09red
map00130	Ubiquinone and other terpenoid-quinone biosynthesis	92	1	1	0	0.798462	0.097745556435395	1	0.0109	C00082	L-Tyrosine	http://www.kegg.jp/pathway/map00130+C00082%09red
map01062	Biosynthesis of terpenoids and steroids	98	1	1	0	0.818607	0.086924624234193	1	0.0102	C00149	L-Malic acid	http://www.kegg.jp/pathway/map01062+C00149%09red
map00140	Steroid hormone biosynthesis	99	1	1	0	0.821765	0.0852525582870636	1	0.0101	C00410	Progesterone	http://www.kegg.jp/pathway/map00140+C00410%09red
map01120	Microbial metabolism in diverse environments	998	14	9	5	0.830712	0.0805497608303269	1	0.014	C00047; C00149; C00227; C00334; C00354; C00530; C00534; C00593; C00632; C00979; C01108; C01198; C05629; C07635	L-Lysine; L-Malic acid; Acetylphosphate; gamma-Aminobutyric acid; Fructose 1,6-bisphosphate; Hydroquinone; Pyridoxamine; Sulfoacetaldehyde; 3-Hydroxyanthranilate; O-Acetylserine; 1,2,3-Trihydroxybenzene; 3-(2-Hydroxyphenyl)propanoic acid; Phenylpropanoate; Epiandrosterone	http://www.kegg.jp/pathway/map01120+C00047%09red+C00149%09red+C00227%09blue+C00334%09red+C00354%09blue+C00530%09blue+C00534%09red+C00593%09red+C00632%09red+C00979%09blue+C01108%09red+C01198%09red+C05629%09blue+C07635%09red
map00624	Polycyclic aromatic hydrocarbon degradation	107	1	1	0	0.845142	0.0730701238134214	1	0.0093	C01198	3-(2-Hydroxyphenyl)propanoic acid	http://www.kegg.jp/pathway/map00624+C01198%09red
map00520	Amino sugar and nucleotide sugar metabolism	108	1	1	0	0.847842	0.0716849745857249	1	0.0093	C00128	Cytidine monophosphate N-acetylneuraminic acid	http://www.kegg.jp/pathway/map00520+C00128%09red
map01057	Biosynthesis of type II polyketide products	135	1	1	0	0.905468	0.0431267993733423	1	0.0074	C00061	FMN	http://www.kegg.jp/pathway/map01057+C00061%09red
map01220	Degradation of aromatic compounds	263	1	0	1	0.990389	0.00419407329547387	1	0.0038	C05629	Phenylpropanoate	http://www.kegg.jp/pathway/map01220+C05629%09blue
map01110	Biosynthesis of secondary metabolites	2072	19	11	8	0.999898	4.43949874490077e-05	1	0.0092	C00047; C00061; C00082; C00148; C00149; C00354; C00398; C00826; C00858; C00864; C00979; C01762; C03758; C06161; C08491; C11964; C16427; C16754; C18054	L-Lysine; FMN; L-Tyrosine; L-Proline; L-Malic acid; Fructose 1,6-bisphosphate; Tryptamine; L-Arogenate; Formononetin; Pantothenic acid; O-Acetylserine; Xanthosine; Dopamine; (S)-Coclaurine; Jasmonic acid; Avermectin A1b aglycone; Isopentenyl adenosine; Aflatoxin G2; 2-Amino-2-deoxyisochorismate	http://www.kegg.jp/pathway/map01110+C00047%09red+C00061%09red+C00082%09red+C00148%09red+C00149%09red+C00354%09blue+C00398%09blue+C00826%09red+C00858%09blue+C00864%09red+C00979%09blue+C01762%09blue+C03758%09red+C06161%09blue+C08491%09blue+C11964%09red+C16427%09red+C16754%09blue+C18054%09red
