# Supplementary material for: The impact of dapagliflozin for the myocardial metabolomic profiles of mice with chronic heart failure induced by a high fat diet
Source: Research Square preprint supplement (doi:10.21203/rs.3.rs-6881055/v1), 2025-06-25
Supplement: Supplementary file 10 [file 799c0f935566dd9b0d10fb0d.xlsx]

## Sheet: DEM_AnalysiList
Accession	HDF_Mean	HDF_Median	HDF_RSD	Chow_Mean	Chow_Median	Chow_RSD	FC	log2FC	P.value	-log10(P.value)	FDR	VIP	Mass-to-charge ratio	Retention indices	Retention times(min)
M100T336	995319	968268	30.26	1.00885e+06	777844	60.76	0.99	-0.02	0.878477	0.06	0.952443	0.248893	100.076	335.8	5.6
M100T343	6.47586e+06	6.04593e+06	59.51	3.52183e+06	2.23695e+06	72.1	1.84	0.88	0.0498834	1.3	0.201689	1.1299	100.076	343.1	5.7
M100T72	1.95673e+07	1.94218e+07	8.47	1.787e+07	1.79321e+07	12.32	1.09	0.13	0.130381	0.88	0.362517	1.09053	100.024	71.8	1.2
M101T119	8.0403e+06	7.99964e+06	12.57	8.18383e+06	7.93468e+06	9.34	0.98	-0.03	0.878477	0.06	0.952443	0.232354	101.06	118.6	2
M101T468	156426	167432	22.39	138957	138793	20.7	1.13	0.17	0.104895	0.98	0.317905	0.56136	101.023	468	7.8
M101T64	5.11289e+06	5.22447e+06	40.24	4.92036e+06	5.06002e+06	19.89	1.04	0.06	0.95913	0.02	0.985204	0.110097	101.06	64.5	1.1
M101T72	3.47107e+06	3.3439e+06	8.75	2.41125e+06	2.55085e+06	30.11	1.44	0.53	0.0001554	3.81	0.00610078	1.47926	101.025	71.7	1.2
M101T807	3.47653e+06	3.29322e+06	41.95	2.39593e+06	2.74153e+06	49.94	1.45	0.54	0.130381	0.88	0.362517	0.95914	100.51	807.1	13.5
M101T85	1.81629e+07	1.80528e+07	30.75	1.82616e+07	1.81739e+07	31.39	0.99	-0.01	0.95913	0.02	0.985204	0.0329238	101.071	85.3	1.4
M101T88	3.28138e+06	3.15048e+06	79.29	6.05118e+06	4.38631e+06	84.38	0.54	-0.88	0.382284	0.42	0.64771	0.672435	100.988	88.1	1.5
M102T122	1.17354e+07	1.10743e+07	47.43	1.16536e+07	9.66906e+06	69.45	1.01	0.01	0.798446	0.1	0.918313	0.32033	102.055	121.9	2
M102T401	3.50984e+06	3.24078e+06	42.87	3.17408e+06	3.20364e+06	43.36	1.11	0.15	0.645377	0.19	0.837808	0.333351	102.091	401.4	6.7
M102T65	9.55832e+07	1.08467e+08	49.67	8.16791e+07	4.8726e+07	83.5	1.17	0.23	0.505361	0.3	0.749981	0.509734	102.127	64.6	1.1
M102T691	1.12668e+07	1.11178e+07	42.66	1.06372e+07	1.03797e+07	29.77	1.06	0.08	0.878477	0.06	0.952443	0.00114431	102.033	690.8	11.5
M102T72_1	4.78415e+06	4.55813e+06	78.61	4.71517e+06	1.02588e+06	196.45	1.01	0.02	0.0649573	1.19	0.238167	0.784147	102.022	71.8	1.2
M102T72_2	9.45835e+06	9.62492e+06	18.31	8.37463e+06	7.91527e+06	28.72	1.13	0.18	0.328205	0.48	0.600385	0.733931	102.034	72	1.2
M102T747	4.4696e+06	4.42072e+06	25.12	4.0422e+06	3.79341e+06	23.96	1.11	0.15	0.573737	0.24	0.794466	0.49028	102.034	747.1	12.5
M102T760	2.31749e+06	2.09744e+06	68.71	1.35136e+06	1.19977e+06	70.32	1.71	0.78	0.234499	0.63	0.504207	0.771567	102.091	760	12.7
M102T815	1.97014e+07	1.85723e+07	45.33	1.91126e+07	1.81059e+07	56.44	1.03	0.04	1	0	1	0.270212	102.127	814.8	13.6
M102T88	3.7976e+07	2.64913e+07	59.95	3.17836e+07	2.52138e+07	76.83	1.19	0.26	0.573737	0.24	0.794466	0.512024	102.055	88.2	1.5
M102T89	3.22938e+06	3.25379e+06	6.51	3.59272e+06	3.57468e+06	7.77	0.9	-0.15	0.0206682	1.68	0.117429	1.55123	102.091	89.5	1.5
M102T99	7.52437e+06	7.76971e+06	16.92	6.73762e+06	6.91547e+06	18.99	1.12	0.16	0.234499	0.63	0.504207	0.718053	102.055	99.4	1.7
M103T103	556295	465462	82.75	646845	675420	65.88	0.86	-0.22	1	0	1	0.271617	103.039	103.3	1.7
M103T338	1.85113e+07	1.94874e+07	28.85	1.78202e+07	1.7521e+07	45.91	1.04	0.05	0.95913	0.02	0.985204	0.270386	103.054	338.4	5.6
M103T72	2.52717e+06	2.32049e+06	65.9	3.61168e+06	3.72084e+06	10.22	0.7	-0.52	0.0104118	1.98	0.0771942	1.35047	102.97	72.1	1.2
M103T88	2.6853e+06	2.35386e+06	45.92	2.21046e+06	1.67557e+06	59.78	1.21	0.28	0.382284	0.42	0.64771	0.591949	103.058	88.2	1.5
M103T89	1.06659e+07	9.56657e+06	32.38	1.07884e+07	7.51162e+06	66.79	0.99	-0.02	0.382284	0.42	0.64771	0.269129	103.039	89.5	1.5
M103T99	1.85751e+06	1.5865e+06	41.65	2.2554e+06	2.1347e+06	21.12	0.82	-0.28	0.0649573	1.19	0.238167	1.00251	103.05	98.6	1.6
M104T113	8.7418e+07	9.05885e+07	17.15	9.78371e+07	1.01699e+08	21.35	0.89	-0.16	0.160528	0.79	0.408129	0.531001	104.107	113.1	1.9
M104T122	3.62318e+07	2.10223e+07	98.37	6.65426e+06	6.78716e+06	22.2	5.44	2.44	0.104895	0.98	0.317905	1.38466	104.053	121.7	2
M104T418	241205	242300	12.26	177406	163974	29.41	1.36	0.44	0.014763	1.83	0.0952789	1.56126	104.053	417.9	7
M104T86	1.3914e+09	1.35354e+09	8.88	9.70884e+08	1.17208e+09	38.42	1.43	0.52	0.0001554	3.81	0.00610078	1.37633	104.107	85.6	1.4
M104T89	9.34982e+07	9.79952e+07	51.41	1.5781e+08	1.50337e+08	29.61	0.59	-0.76	0.0206682	1.68	0.117429	1.44721	104.07	88.8	1.5
M104T99	2.11693e+07	2.11377e+07	24.19	3.16729e+07	2.80782e+07	41.61	0.67	-0.58	0.0498834	1.3	0.201689	1.34108	104.107	99.3	1.7
M105T381	2.40717e+06	1.0503e+06	126.61	2.75894e+06	1.53333e+06	126.71	0.87	-0.2	0.0649573	1.19	0.238167	0.652069	105.07	380.9	6.3
M105T502	45971.1	46945.1	19.17	53228.9	53435.5	24.95	0.86	-0.21	0.234499	0.63	0.504207	0.699814	105.037	501.6	8.4
M105T72	3.59531e+06	3.4713e+06	14.5	3.26585e+06	3.14575e+06	14.06	1.1	0.14	0.160528	0.79	0.408129	0.904085	105.003	71.8	1.2
M105T86	1.16648e+08	1.13023e+08	71.14	3.53643e+07	2.50886e+07	95.07	3.3	1.72	0.0498834	1.3	0.201689	1.14318	105.11	85.6	1.4
M105T89	4.40785e+06	4.48972e+06	8.49	5.50813e+06	5.51041e+06	8.52	0.8	-0.32	0.0001554	3.81	0.00610078	2.00945	105.074	88.8	1.5
M106T116	2.06485e+06	1.87719e+06	27.7	2.66183e+06	2.73671e+06	49.36	0.78	-0.37	0.382284	0.42	0.64771	0.605244	106.05	116.4	1.9
M106T468	296878	214067	55.16	57628.4	24760.2	136.08	5.15	2.37	0.0029526	2.53	0.0361958	2.00285	106.086	468.1	7.8
M106T73	632309	634125	24.25	596119	575312	14.02	1.06	0.09	0.798446	0.1	0.918313	0.345394	105.963	73.2	1.2
M106T84	9.10968e+07	8.79859e+07	26.9	6.97054e+07	6.93218e+07	10.85	1.31	0.39	0.0649573	1.19	0.238167	1.40005	106.05	84.5	1.4
M106T86	1.6051e+06	1.07488e+06	83.63	1.7042e+06	1.69184e+06	52.47	0.94	-0.09	0.798446	0.1	0.918313	0.2709	106.111	85.6	1.4
M107T125	1.56901e+06	1.6374e+06	29.94	1.17443e+06	1.36361e+06	43.2	1.34	0.42	0.0379176	1.42	0.171246	0.858611	107.049	125.3	2.1
M107T338	6.49369e+06	6.51068e+06	10.68	6.62438e+06	6.87646e+06	12.7	0.98	-0.03	0.645377	0.19	0.837808	0.163524	107.049	338.4	5.6
M107T624	1.17858e+06	1.07477e+06	24.27	1.05192e+06	1.06078e+06	16.34	1.12	0.16	0.720901	0.14	0.878065	0.627029	107.049	624.1	10.4
M107T742	4.01286e+06	3.58745e+06	49.53	3.29331e+06	3.20133e+06	40.15	1.22	0.29	0.505361	0.3	0.749981	0.487121	107.049	741.5	12.4
M107T80	4.26466e+07	3.65024e+07	41.29	4.5783e+07	4.55147e+07	44.82	0.93	-0.1	0.720901	0.14	0.878065	0.0283806	106.951	80.2	1.3
M107T84	1.63435e+06	1.55344e+06	27.07	1.08166e+06	1.06664e+06	47.25	1.51	0.6	0.0649573	1.19	0.238167	1.38848	107.053	84.1	1.4
M108T115	1.94408e+06	1.86596e+06	39.89	847286	967749	55.56	2.29	1.2	0.004662	2.33	0.0475536	1.41439	107.505	114.5	1.9
M108T86	1.5918e+07	1.57378e+07	9.99	1.41165e+07	1.35144e+07	16.46	1.13	0.17	0.160528	0.79	0.408129	1.1166	108.011	85.8	1.4
M109T112	240503	235441	19.9	291584	304202	18.64	0.82	-0.28	0.0829837	1.08	0.275972	1.14633	109.032	112.1	1.9
M109T682	1.43323e+06	1.43782e+06	54.68	2.27228e+06	1.48742e+06	93.88	0.63	-0.66	0.720901	0.14	0.878065	0.588211	109.101	681.7	11.4
M109T723	239688	266223	35.35	155244	128793	62.06	1.54	0.63	0.0649573	1.19	0.238167	1.15851	109.065	722.7	12
M109T744	2.34962e+06	2.03274e+06	53.02	1.84933e+06	1.8744e+06	31.62	1.27	0.35	0.573737	0.24	0.794466	0.514548	109.101	744.2	12.4
M109T75	2.03133e+07	2.33837e+07	57.31	1.50957e+07	1.13319e+07	67.83	1.35	0.43	0.382284	0.42	0.64771	0.663807	109.076	74.6	1.2
M109T80	2.67551e+06	2.68724e+06	31.88	2.92791e+06	2.63458e+06	31.02	0.91	-0.13	0.798446	0.1	0.918313	0.464894	108.949	80.3	1.3
M109T89	2.41527e+06	2.53936e+06	15.91	3.28775e+06	3.25537e+06	9.5	0.73	-0.44	0.0001554	3.81	0.00610078	1.935	109.028	88.8	1.5
M110T122	5.08515e+06	4.97741e+06	62.62	6.27901e+06	6.67891e+06	58.44	0.81	-0.3	0.441803	0.35	0.702485	0.386818	110.035	121.9	2
M110T552	294093	322935	57.57	211623	169877	84.06	1.39	0.47	0.328205	0.48	0.600385	0.647241	110.105	551.9	9.2
M110T566	483067	321628	82.21	321318	313370	64.1	1.5	0.59	0.441803	0.35	0.702485	0.511807	110.027	566.3	9.4
M110T67	1.34724e+07	1.34252e+07	2.24	1.3342e+07	1.34403e+07	4.07	1.01	0.01	0.95913	0.02	0.985204	0.405148	110.021	66.9	1.1
M110T68	498747	388282	98.57	306742	220558	55.27	1.63	0.7	0.95913	0.02	0.985204	0.105791	109.597	68.1	1.1
M110T72	2.23335e+08	2.15949e+08	45.63	2.03128e+08	2.3119e+08	39.64	1.1	0.14	0.645377	0.19	0.837808	0.191183	110.009	71.7	1.2
M110T73	1.4729e+06	1.346e+06	55.04	1.16454e+06	1.09026e+06	60.98	1.26	0.34	0.573737	0.24	0.794466	0.546835	109.979	72.9	1.2
M110T797	1.11788e+09	1.01636e+09	62.03	1.03142e+09	9.63444e+08	19.24	1.08	0.12	0.798446	0.1	0.918313	0.218131	110.02	797.4	13.3
M110T811	6.14615e+07	5.36071e+07	69.28	1.78101e+08	1.28272e+08	74.42	0.35	-1.53	0.014763	1.83	0.0952789	1.58015	110.02	811.1	13.5
M110T86	3.23142e+07	3.41888e+07	28.82	2.90257e+07	2.66531e+07	35.89	1.11	0.15	0.328205	0.48	0.600385	0.324277	110.027	85.6	1.4
M111T104	2.55838e+06	2.63749e+06	22.29	2.87306e+06	2.89542e+06	21.87	0.89	-0.17	0.441803	0.35	0.702485	0.632502	111.044	104.3	1.7
M111T481	1.54846e+07	1.58011e+07	32.48	1.04782e+07	8.51894e+06	39.03	1.48	0.56	0.104895	0.98	0.317905	1.25994	111.117	480.7	8
M111T629	1.02494e+06	1.13684e+06	30.68	1.15424e+06	987395	45.17	0.89	-0.17	0.798446	0.1	0.918313	0.234364	111.044	628.7	10.5
M111T64	8.67911e+06	7.5196e+06	90.73	2.89926e+06	2.74351e+06	29.11	2.99	1.58	0.382284	0.42	0.64771	0.950702	111.117	63.8	1.1
M111T72	2.41876e+07	2.56135e+07	24.97	2.38491e+07	2.45511e+07	28.19	1.01	0.02	0.95913	0.02	0.985204	0.136419	111.01	71.7	1.2
M111T801	1.94585e+09	1.46982e+09	48.82	1.24069e+09	1.15271e+09	29.62	1.57	0.65	0.0498834	1.3	0.201689	1.29619	111.019	801.1	13.4
M111T818	6.48873e+06	6.41045e+06	32.21	4.53147e+06	4.75414e+06	24.78	1.43	0.52	0.104895	0.98	0.317905	1.29058	111.117	817.6	13.6
M112T104	2.28473e+06	2.26311e+06	15.84	1.51283e+06	1.65094e+06	28.9	1.51	0.59	0.0029526	2.53	0.0361958	1.64102	112.076	103.6	1.7
M112T110	687887	393710	87.81	1.25086e+06	996767	71.3	0.55	-0.86	0.104895	0.98	0.317905	1.00895	112.039	110.4	1.8
M112T118	4.47371e+08	4.21556e+08	65.97	4.84884e+08	4.18451e+08	54.61	0.92	-0.12	0.878477	0.06	0.952443	0.207524	112.05	118.1	2
M112T423	1.08977e+06	743393	90.18	720753	757850	47.36	1.51	0.6	0.720901	0.14	0.878065	0.68299	112.05	422.8	7
M112T481	1.08151e+06	862294	107.86	848577	744331	54.82	1.27	0.35	0.798446	0.1	0.918313	0.0620693	112.12	480.8	8
M112T67	892568	911046	11.81	844851	810170	17.23	1.06	0.08	0.441803	0.35	0.702485	0.528726	112.112	66.7	1.1
M112T73	2.51726e+07	2.01123e+07	60.9	2.19669e+07	1.67172e+07	67.37	1.15	0.2	0.798446	0.1	0.918313	0.472228	112.087	73.1	1.2
M112T801	7.04649e+08	8.13939e+08	41.4	7.1748e+08	7.73196e+08	29.34	0.98	-0.03	1	0	1	0.164142	112.019	801.2	13.4
M112T802	3.24699e+07	3.18353e+07	33.73	3.04717e+07	2.20189e+07	46.81	1.07	0.09	0.505361	0.3	0.749981	0.383516	111.52	802.4	13.4
M112T814	5.10309e+07	5.57162e+07	42.52	2.14245e+07	2.07411e+07	30.16	2.38	1.25	0.0018648	2.73	0.0275628	1.82414	111.522	814	13.6
M112T99	7.62728e+06	7.50088e+06	8.89	7.30085e+06	7.36719e+06	5.16	1.04	0.06	0.441803	0.35	0.702485	0.728208	112.05	99.2	1.7
M113T115	531148	411052	81.78	2.64114e+06	2.31022e+06	39.02	0.2	-2.31	0.0001554	3.81	0.00610078	2.01172	113.071	114.7	1.9
M113T118	1.0315e+07	3.82471e+06	106.66	2.96692e+07	3.22231e+07	44.31	0.35	-1.52	0.00699301	2.16	0.0602244	1.57668	113.054	118	2
M113T122	1.09859e+08	1.04385e+08	43.24	1.56036e+08	1.31155e+08	77.15	0.7	-0.51	0.573737	0.24	0.794466	0.136707	113.035	122.2	2
M113T174	3.4e+07	3.42166e+07	16.36	2.67335e+07	2.85314e+07	25.17	1.27	0.35	0.130381	0.88	0.362517	1.29439	113.035	173.9	2.9
M113T315	1.41803e+07	1.14546e+07	39.46	1.59561e+07	1.25237e+07	65.78	0.89	-0.17	0.95913	0.02	0.985204	0.0380497	113.029	314.8	5.2
M113T449	1.21308e+06	930908	56.17	1.00866e+06	935421	42.87	1.2	0.27	0.720901	0.14	0.878065	0.480061	113.096	448.7	7.5
M113T72	1.103e+06	1.10346e+06	9.39	1.1801e+06	1.15114e+06	14.86	0.93	-0.1	0.505361	0.3	0.749981	0.653873	113.01	71.8	1.2
M113T724	389155	351193	44.22	1.00065e+06	849219	44.21	0.39	-1.36	0.0010878	2.96	0.0203124	1.8913	113.06	723.8	12.1
M113T73	1.06054e+06	1.03467e+06	37.01	549539	509608	71.95	1.93	0.95	0.0281274	1.55	0.141969	1.33474	113.09	73.1	1.2
M113T776	6.21929e+06	5.46203e+06	42.93	5.21368e+06	5.05138e+06	28.33	1.19	0.25	0.798446	0.1	0.918313	0.557124	113.06	775.8	12.9
M113T787	3.72286e+06	3.98196e+06	19.9	3.87958e+06	4.05437e+06	27.78	0.96	-0.06	0.382284	0.42	0.64771	0.0656048	113.06	786.6	13.1
M113T83	4.94498e+06	6.97201e+06	81.34	4.80754e+06	3.31558e+06	107.57	1.03	0.04	0.95913	0.02	0.985204	0.190836	112.896	82.9	1.4
M113T89_1	4.15004e+07	4.23544e+07	34.12	1.27236e+08	1.24247e+08	31.82	0.33	-1.62	0.0001554	3.81	0.00610078	2.16357	113	89.1	1.5
M113T89_2	2.288e+06	2.33969e+06	17.65	2.45144e+06	2.22516e+06	35.36	0.93	-0.1	0.95913	0.02	0.985204	0.169753	113.071	89	1.5
M114T108	9.06801e+06	8.39326e+06	44.22	4.72466e+06	4.51784e+06	40.58	1.92	0.94	0.0104118	1.98	0.0771942	1.57982	114.091	107.6	1.8
M114T121	1.13744e+07	1.20245e+07	45.26	2.20652e+06	1.81382e+06	92.91	5.15	2.37	0.000621601	3.21	0.0140919	2.04825	114.055	121.4	2
M114T130	2.62198e+07	1.8748e+07	82.22	2.03298e+08	1.95674e+08	21.44	0.13	-2.95	0.0001554	3.81	0.00610078	2.19213	114.065	129.9	2.2
M114T143	7.50091e+07	7.08028e+07	20.38	4.89002e+07	4.39052e+07	31.8	1.53	0.62	0.00699301	2.16	0.0602244	1.77149	114.065	143.4	2.4
M114T156	1.04255e+07	1.0439e+07	44.56	1.12806e+07	1.11982e+07	26.52	0.92	-0.11	0.720901	0.14	0.878065	0.509808	114.065	156.5	2.6
M114T165	4.57618e+07	4.54135e+07	8.85	3.59725e+07	3.53893e+07	22.2	1.27	0.35	0.014763	1.83	0.0952789	1.57928	114.065	164.7	2.7
M114T174	4.20342e+06	4.36181e+06	17.38	2.89149e+06	3.02198e+06	24.76	1.45	0.54	0.004662	2.33	0.0475536	1.65164	114.038	173.9	2.9
M114T194	9.68247e+07	8.23478e+07	41.49	4.73689e+07	4.1712e+07	40.37	2.04	1.03	0.004662	2.33	0.0475536	1.71756	114.065	193.7	3.2
M114T208	2.17331e+07	1.91672e+07	54.11	8.5117e+06	8.24402e+06	18.29	2.55	1.35	0.000621601	3.21	0.0140919	1.80647	114.065	208.3	3.5
M114T232	2.76669e+07	2.72387e+07	15.13	2.97543e+07	2.99688e+07	16.69	0.93	-0.1	0.382284	0.42	0.64771	0.515052	114.065	232.4	3.9
M114T249	1.00956e+07	619360	177.79	1.83764e+07	1.49945e+07	107.25	0.55	-0.86	0.878477	0.06	0.952443	0.382649	114.065	249.1	4.2
M114T315	1.51453e+06	1.32838e+06	51.93	2.31163e+06	2.26559e+06	43.64	0.66	-0.61	0.160528	0.79	0.408129	1.0445	114.037	314.7	5.2
M114T338	1.0125e+08	86782182	104.5	6.607e+06	4.3997e+06	104.2	15.32	3.94	0.382284	0.42	0.64771	1.17485	114.065	338.2	5.6
M114T342	1.33249e+07	1.26577e+07	56.67	1.65457e+07	1.69071e+07	47.31	0.81	-0.31	0.645377	0.19	0.837808	0.500194	114.128	342.4	5.7
M114T35	4.35482e+07	3.71452e+07	42.91	3.83576e+07	3.44649e+07	20.71	1.14	0.18	0.878477	0.06	0.952443	0.376303	113.963	34.8	0.6
M114T384	6.43165e+07	6.15129e+07	31.37	5.97632e+07	5.74675e+07	21.08	1.08	0.11	0.720901	0.14	0.878065	0.253636	114.065	384.1	6.4
M114T402	2.21108e+07	1.82226e+07	51.91	3.50491e+07	3.28984e+07	51.23	0.63	-0.66	0.0829837	1.08	0.275972	1.09329	114.065	402.4	6.7
M114T419	3.52065e+07	3.71076e+07	34.28	2.59665e+07	2.42708e+07	43.48	1.36	0.44	0.194872	0.71	0.457172	0.850974	114.092	418.6	7
M114T427	5.15263e+07	4.11421e+07	49.06	4.05885e+07	3.06639e+07	65.75	1.27	0.34	0.130381	0.88	0.362517	0.738958	114.065	427	7.1
M114T442	1.27345e+07	1.42277e+07	33.05	1.19762e+07	1.31016e+07	49.29	1.06	0.09	0.720901	0.14	0.878065	0.565666	114.065	442	7.4
M114T463	1.11165e+06	1.06853e+06	71.92	910605	946904	45.24	1.22	0.29	0.645377	0.19	0.837808	0.076428	114.128	463.4	7.7
M114T473	7.96444e+07	5.53897e+07	59.4	6.11506e+07	3.96274e+07	89.52	1.3	0.38	0.234499	0.63	0.504207	0.744497	114.065	472.6	7.9
M114T534	5.78941e+07	5.28273e+07	72.93	1.02396e+08	1.06691e+08	24.16	0.57	-0.82	0.0649573	1.19	0.238167	1.45846	114.065	534.1	8.9
M114T554	1.35637e+07	1.26706e+07	31.12	1.29724e+07	1.30022e+07	29.15	1.05	0.06	1	0	1	0.213266	114.065	553.6	9.2
M114T566	3.04617e+07	2.71679e+07	72.2	4.54467e+07	3.92301e+07	32.07	0.67	-0.58	0.104895	0.98	0.317905	1.11767	114.065	565.7	9.4
M114T577	1.40522e+08	1.38016e+08	49.6	6.02118e+07	3.24072e+07	114.12	2.33	1.22	0.0206682	1.68	0.117429	1.37872	114.065	576.7	9.6
M114T592	3.52766e+07	3.6452e+07	33.62	4.03834e+07	4.52436e+07	35.95	0.87	-0.2	0.328205	0.48	0.600385	0.223234	114.065	592.3	9.9
M114T607	5.65578e+07	5.65208e+07	45.45	4.67663e+07	4.25435e+07	47.86	1.21	0.27	0.645377	0.19	0.837808	0.435984	114.065	606.6	10.1
M114T618	8.77077e+07	8.73606e+07	44.27	7.10885e+07	7.61845e+07	46.72	1.23	0.3	0.278632	0.55	0.551712	0.596348	114.065	618.2	10.3
M114T634	7.44257e+07	7.73522e+07	28.94	9.90352e+07	1.11998e+08	23.26	0.75	-0.41	0.0498834	1.3	0.201689	1.17629	114.065	634.3	10.6
M114T64	1.96005e+07	1.9273e+07	17.5	1.94368e+07	1.88109e+07	7.12	1.01	0.01	0.720901	0.14	0.878065	0.0401764	114.091	63.8	1.1
M114T649	4.16593e+07	3.68245e+07	54.33	4.85535e+07	5.06499e+07	29.95	0.86	-0.22	0.382284	0.42	0.64771	0.626125	114.065	648.7	10.8
M114T660	5.47685e+07	4.66669e+07	51.99	4.03256e+07	4.05844e+07	32.79	1.36	0.44	0.645377	0.19	0.837808	0.727908	114.065	659.7	11
M114T678	1.7533e+07	1.32907e+07	52.93	2.17885e+07	2.11525e+07	31.52	0.8	-0.31	0.194872	0.71	0.457172	0.854777	114.065	678.3	11.3
M114T68	5.25615e+07	5.62542e+07	22.03	6.04527e+07	6.01942e+07	23.13	0.87	-0.2	0.328205	0.48	0.600385	0.743911	113.963	67.7	1.1
M114T686	5.27401e+07	5.47898e+07	31.78	3.73805e+07	3.82243e+07	38.4	1.41	0.5	0.104895	0.98	0.317905	0.998483	114.065	686.1	11.4
M114T698	4.14519e+07	4.19015e+07	36.55	4.49149e+07	4.32718e+07	31.01	0.92	-0.12	0.720901	0.14	0.878065	0.389106	114.065	698.5	11.6
M114T731	5.94001e+07	5.73322e+07	26.85	4.67884e+07	4.83118e+07	28.44	1.27	0.34	0.104895	0.98	0.317905	0.995346	114.065	730.8	12.2
M114T752	4.38407e+07	4.22541e+07	32.91	3.60039e+07	3.90368e+07	46.24	1.22	0.28	0.573737	0.24	0.794466	0.690916	114.065	752	12.5
M114T799	2.06921e+08	2.2539e+08	26.17	2.7813e+08	2.7706e+08	17.83	0.74	-0.43	0.0498834	1.3	0.201689	1.41652	113.963	798.9	13.3
M114T813	1.51998e+08	1.36453e+08	46.19	1.48884e+08	1.5979e+08	29.35	1.02	0.03	0.720901	0.14	0.878065	0.0813206	114.065	813.1	13.6
M114T92	1.67294e+09	1.7048e+09	47.36	9.41094e+08	9.17079e+08	87.42	1.78	0.83	0.104895	0.98	0.317905	1.05311	114.066	91.7	1.5
M115T309	1.30921e+08	1.31596e+08	20.18	1.29842e+08	1.25383e+08	33.25	1.01	0.01	0.95913	0.02	0.985204	0.217844	115.039	309.4	5.2
M115T36	2.86083e+06	2.89746e+06	6.41	3.18079e+06	3.11004e+06	7.85	0.9	-0.15	0.0206682	1.68	0.117429	1.52749	114.971	35.7	0.6
M115T377	837946	762069	19.75	794077	751281	12.4	1.06	0.08	0.95913	0.02	0.985204	0.387582	115.039	377.3	6.3
M115T387	2.28641e+06	2.00334e+06	47.5	1.40564e+06	1.58715e+06	94.44	1.63	0.7	0.234499	0.63	0.504207	1.0825	115.075	387.4	6.5
M115T397	671432	625993	50.38	483687	608424	62.18	1.39	0.47	0.382284	0.42	0.64771	0.682034	115.054	397.1	6.6
M115T419	1.5802e+06	1.64496e+06	31.84	541457	533351	26.89	2.92	1.55	0.0003108	3.51	0.00894927	2.15143	115.095	418.7	7
M115T487	676843	581771	61.55	795723	769135	48.4	0.85	-0.23	0.505361	0.3	0.749981	0.383461	115.075	487.4	8.1
M115T72	2.28571e+06	2.33209e+06	9.4	2.31007e+06	2.52576e+06	21.62	0.99	-0.02	0.645377	0.19	0.837808	0.0445059	114.988	71.8	1.2
M115T76	2.03819e+06	1.97268e+06	12.76	1.94123e+06	1.93712e+06	6.69	1.05	0.07	0.645377	0.19	0.837808	0.533656	115.087	76	1.3
M115T89	1.15903e+06	1.18253e+06	18.24	3.40092e+06	3.39699e+06	2.85	0.34	-1.55	0.0001554	3.81	0.00610078	2.42128	115.087	89	1.5
M115T92	4.66022e+07	3.87321e+07	38.72	1.53364e+07	8.87741e+06	84.88	3.04	1.6	0.0010878	2.96	0.0203124	1.77956	115.07	91.7	1.5
M115T94	4.1147e+06	3206528	94.15	8.8057e+06	9.05111e+06	60.17	0.47	-1.1	0.0498834	1.3	0.201689	1.00232	115.05	94.2	1.6
M116T100	994482	924314	63.05	787476	711596	67.58	1.26	0.34	0.573737	0.24	0.794466	0.475563	116.082	99.8	1.7
M116T103	1.05987e+07	9.7862e+06	32.91	6.53927e+06	6092225	37.68	1.62	0.7	0.0498834	1.3	0.201689	1.42486	116.107	103.1	1.7
M116T309	3.93751e+06	3.87074e+06	62.99	7.65973e+06	4.57988e+06	108.48	0.51	-0.96	0.798446	0.1	0.918313	0.218781	116.042	309.1	5.2
M116T356	1.35065e+06	1.30593e+06	10.38	753565	838383	41.13	1.79	0.84	0.0003108	3.51	0.00894927	1.53668	116.034	356.4	5.9
M116T363	626333	486731	79.19	250455	169326	94.62	2.5	1.32	0.0649573	1.19	0.238167	1.20494	115.574	362.6	6
M116T76	1.01825e+07	1.02954e+07	22	8.99915e+06	8.47771e+06	16.89	1.13	0.18	0.441803	0.35	0.702485	0.758119	116.07	75.9	1.3
M116T787	1.30855e+06	951923	67.13	1.16265e+06	810164	96.18	1.13	0.17	0.573737	0.24	0.794466	0.384938	116.053	786.8	13.1
M116T800	1.45185e+06	1.17167e+06	42.77	1.15138e+06	1.06215e+06	29.44	1.26	0.33	0.278632	0.55	0.551712	0.698502	115.964	799.5	13.3
M116T806	1.70902e+06	1.30975e+06	67.63	1.17348e+06	875051	84.11	1.46	0.54	0.234499	0.63	0.504207	0.819017	115.964	806.4	13.4
M116T85	2.47928e+07	2.36858e+07	21.67	2.51109e+07	2.33462e+07	41.59	0.99	-0.02	0.95913	0.02	0.985204	0.17376	116.034	85.1	1.4
M116T96	1.61792e+09	1.53547e+09	23.72	1.47156e+09	1.38792e+09	34.12	1.1	0.14	0.798446	0.1	0.918313	0.562859	116.07	96.3	1.6
M117T108	1.35583e+07	1.35155e+07	14.1	1.19107e+07	1.15958e+07	10.97	1.14	0.19	0.104895	0.98	0.317905	1.17007	116.966	107.7	1.8
M117T115	2.19428e+06	2.16848e+06	18.98	1.80481e+06	1.92599e+06	31.14	1.22	0.28	0.278632	0.55	0.551712	0.869597	116.51	114.5	1.9
M117T266	5.60716e+06	5.67862e+06	12.53	4.47412e+06	4.38412e+06	37.28	1.25	0.33	0.194872	0.71	0.457172	1.198	116.966	266.3	4.4
M117T309	379343	99599.8	136.97	937578	355282	164.1	0.4	-1.31	0.104895	0.98	0.317905	1.05429	117.043	308.7	5.1
M117T334	270205	213319	70.95	187212	103262	111.43	1.44	0.53	0.382284	0.42	0.64771	0.95082	117.055	334.1	5.6
M117T432	619102	644102	17	617931	627374	26.43	1	0	1	0	1	0.087372	117.102	432.1	7.2
M117T756	9.61532e+06	9.01889e+06	53.23	1.07035e+07	1.12535e+07	61.48	0.9	-0.15	0.95913	0.02	0.985204	0.128521	116.524	756.5	12.6
M117T90	1.12137e+06	1.07981e+06	21.51	1.30911e+06	1.35455e+06	21.8	0.86	-0.22	0.160528	0.79	0.408129	0.871364	117.055	90.2	1.5
M117T96	6.55729e+07	6.49442e+07	9.86	6.50713e+07	6.17897e+07	19.65	1.01	0.01	0.798446	0.1	0.918313	0.204407	117.074	96.3	1.6
M118T111	1.13021e+06	1.10644e+06	19.64	1.21975e+06	1.21391e+06	27.17	0.93	-0.11	0.573737	0.24	0.794466	0.303125	118.123	111	1.9
M118T120	1.27348e+09	1.3769e+09	30.15	1.21781e+09	1.3293e+09	35.78	1.05	0.06	0.798446	0.1	0.918313	0.145497	118.086	120.2	2
M118T308	209771	238557	71.75	170388	164787	101.78	1.23	0.3	0.645377	0.19	0.837808	0.570628	118.023	308.3	5.1
M118T339	1.87862e+06	1.57001e+06	75.98	1.26301e+06	1.24338e+06	60.57	1.49	0.57	0.382284	0.42	0.64771	0.304839	118.065	338.5	5.6
M118T35	3.16685e+07	3.1203e+07	12.2	3.61654e+07	3.49414e+07	8.5	0.88	-0.19	0.0281274	1.55	0.141969	1.40962	118.085	35.3	0.6
M118T399	1.51119e+07	1.33504e+07	58.49	1.50507e+07	1.52391e+07	29.56	1	0.01	0.878477	0.06	0.952443	0.325099	118.065	399.3	6.7
M118T89	4.00884e+06	4.29059e+06	26.19	4.87829e+06	4.90595e+06	14.08	0.82	-0.28	0.0829837	1.08	0.275972	1.12212	118.061	88.8	1.5
M118T90	2.83344e+08	2.04801e+08	78.32	1.67545e+08	1.68861e+08	20.28	1.69	0.76	0.573737	0.24	0.794466	0.772455	118.086	90.4	1.5
M118T97	2.9421e+06	1834734	126.93	1.84483e+06	514558	124.19	1.59	0.67	0.573737	0.24	0.794466	0.622877	118.075	96.7	1.6
M119T105	4.67652e+06	1.63142e+06	116.84	319284	338319	21.03	14.65	3.87	0.160528	0.79	0.408129	1.46456	119.016	104.8	1.7
M119T120	6.46965e+07	6.67979e+07	19.99	7.24955e+07	7.27164e+07	19.39	0.89	-0.16	0.382284	0.42	0.64771	0.688967	119.09	120.2	2
M119T125	9.50828e+06	8.84128e+06	43.74	9.5384e+06	8.95664e+06	35.6	1	0	0.95913	0.02	0.985204	0.103972	119.049	124.5	2.1
M119T139	2.7991e+06	3.01191e+06	64.11	5.07936e+06	4.96467e+06	22.38	0.55	-0.86	0.0104118	1.98	0.0771942	1.42178	119.049	139.2	2.3
M119T191	2.95624e+06	3.00441e+06	27.93	2.52052e+06	2.51707e+06	16.06	1.17	0.23	0.104895	0.98	0.317905	0.738683	119.049	190.9	3.2
M119T400	1.27543e+07	1.18041e+07	72.75	3.74181e+06	3.61132e+06	43.58	3.41	1.77	0.0206682	1.68	0.117429	1.52411	119.073	399.5	6.7
M119T585	774186	753293	15.01	528305	582330	44.75	1.47	0.55	0.0206682	1.68	0.117429	1.36883	119.049	584.9	9.7
M119T64	301317	296871	34.57	311590	325311	21.43	0.97	-0.05	0.878477	0.06	0.952443	0.248719	119.085	64.2	1.1
M119T699	250475	228009	49.02	250666	228269	65.8	1	0	0.95913	0.02	0.985204	0.229427	119.049	699.3	11.7
M119T72	1.41739e+06	1.42004e+06	14.32	1.31132e+06	1.2951e+06	13.37	1.08	0.11	0.328205	0.48	0.600385	0.670675	119.014	71.7	1.2
M119T73	2.0351e+06	1.57312e+06	72.62	1.67179e+06	1.01131e+06	77.78	1.22	0.28	0.798446	0.1	0.918313	0.512875	118.984	73	1.2
M119T760	6.16865e+06	5.96949e+06	18.49	5.4648e+06	4.76333e+06	50.8	1.13	0.17	0.441803	0.35	0.702485	0.737266	119.014	759.5	12.7
M119T790	1.05164e+07	1.09589e+07	19.62	5.98338e+06	4.51786e+06	52.57	1.76	0.81	0.0029526	2.53	0.0361958	1.6428	119.014	789.6	13.2
M119T802_1	1.61801e+06	1.71927e+06	27.5	1.39019e+06	1.44554e+06	24.55	1.16	0.22	0.234499	0.63	0.504207	0.683708	119.014	802.3	13.4
M119T802_2	4.05577e+06	3.87999e+06	44.03	2.20792e+06	1.89308e+06	50.93	1.84	0.88	0.0281274	1.55	0.141969	1.48712	119.084	801.6	13.4
M119T813	960625	983499	35.79	711368	706250	18.36	1.35	0.43	0.104895	0.98	0.317905	1.06541	119.084	812.7	13.5
M120T100	7.47912e+06	7.36467e+06	9.17	6.70154e+06	6.68458e+06	12.19	1.12	0.16	0.0498834	1.3	0.201689	1.21646	120.066	99.7	1.7
M120T120	4.26194e+06	3.9854e+06	32.53	5.05548e+06	5.05224e+06	17.34	0.84	-0.25	0.160528	0.79	0.408129	0.960816	120.091	120	2
M120T338	7.26929e+08	7.23242e+08	21.41	7.86767e+08	7.33536e+08	23.46	0.92	-0.11	0.798446	0.1	0.918313	0.485628	120.081	338.3	5.6
M120T342	77752.9	95609.2	71.97	53333.3	27212.6	111.68	1.46	0.54	0.382284	0.42	0.64771	0.828751	120.044	341.9	5.7
M120T83	1.6182e+06	1.73911e+06	43.92	2.06914e+06	1.71406e+06	48.51	0.78	-0.35	0.645377	0.19	0.837808	0.740372	120.102	83.4	1.4
M120T87	1.86337e+08	1.71792e+08	24.64	9.48037e+07	1.02848e+08	40.61	1.97	0.97	0.0003108	3.51	0.00894927	1.77522	120.066	87.4	1.5
M121T124	1.06448e+07	1.07127e+07	28.34	8.68414e+06	9.45942e+06	25.37	1.23	0.29	0.160528	0.79	0.408129	0.722079	121.051	124.2	2.1
M121T133	748918	678442	55.76	1.19956e+06	1.38657e+06	47.07	0.62	-0.68	0.104895	0.98	0.317905	0.896302	121.051	133.5	2.2
M121T338_1	2.58639e+06	2.66205e+06	56.47	4.13069e+06	3.12047e+06	69.97	0.63	-0.68	0.382284	0.42	0.64771	0.724873	121.065	338.2	5.6
M121T338_2	1.45167e+08	1.4826e+08	38.6	6.14116e+07	6.56897e+07	28.31	2.36	1.24	0.004662	2.33	0.0475536	1.80275	121.084	338.4	5.6
M121T90	1.48232e+07	1.61946e+07	34.5	1.44628e+07	1.47034e+07	19.94	1.02	0.04	0.95913	0.02	0.985204	0.0842429	121.07	90.4	1.5
M122T338	2.30249e+06	2.27467e+06	10.4	1.89885e+06	1.88904e+06	16.24	1.21	0.28	0.0206682	1.68	0.117429	1.53809	122.088	338.4	5.6
M122T34	1.33217e+07	1.31553e+07	23.2	8.43932e+06	9.15382e+06	37.09	1.58	0.66	0.014763	1.83	0.0952789	1.34419	121.972	33.9	0.6
M122T381	2.2986e+06	2.56018e+06	39.58	1.94101e+06	2.15955e+06	63.02	1.18	0.24	0.878477	0.06	0.952443	0.262999	122.097	380.8	6.3
M122T65	1.56872e+07	1.67934e+07	26.39	1.48219e+07	1.43887e+07	26.87	1.06	0.08	0.505361	0.3	0.749981	0.230877	121.972	64.6	1.1
M123T122	4.62332e+09	4.39333e+09	34.39	5.48795e+09	5.73335e+09	29.15	0.84	-0.25	0.278632	0.55	0.551712	0.732461	123.055	121.8	2
M123T125	1.59282e+07	1.48284e+07	35.36	1.28169e+07	1.05908e+07	54.23	1.24	0.31	0.160528	0.79	0.408129	0.809872	123.044	125	2.1
M123T139	9.32787e+06	9.27828e+06	7.89	3.69264e+06	3.71996e+06	25.24	2.53	1.34	0.0001554	3.81	0.00610078	2.34366	123.044	139.5	2.3
M123T140	8.58103e+08	8.15845e+08	27.92	4.8295e+08	3.556e+08	56.78	1.78	0.83	0.014763	1.83	0.0952789	1.70147	123.055	140.2	2.3
M123T191	8.07521e+06	7.92505e+06	27.57	6.86341e+06	7.62811e+06	50.77	1.18	0.23	0.798446	0.1	0.918313	0.694732	123.044	190.8	3.2
M123T33	400341	381344	36.92	505000	587906	37.39	0.79	-0.34	0.278632	0.55	0.551712	0.600352	123.044	33.4	0.6
M123T472	2.99162e+07	2.60171e+07	36.54	2.52777e+07	21365175	34.48	1.18	0.24	0.130381	0.88	0.362517	0.669011	123.054	472.3	7.9
M123T81	3.5993e+08	2.94229e+08	51.72	4.89657e+08	5.14576e+08	31.43	0.74	-0.44	0.0829837	1.08	0.275972	1.1739	122.925	80.9	1.3
M124T122_1	8.07196e+06	6.93283e+06	52.45	1.10804e+07	1.07052e+07	59.38	0.73	-0.46	0.328205	0.48	0.600385	0.566686	124.039	121.7	2
M124T122_2	2.09804e+08	1.93686e+08	75.1	1.50116e+08	1.12403e+08	95.52	1.4	0.48	0.441803	0.35	0.702485	0.846184	124.059	121.8	2
M124T140	3.5505e+07	2.21458e+07	90.7	9.41419e+06	3.03044e+06	148.64	3.77	1.92	0.014763	1.83	0.0952789	1.51998	124.059	140	2.3
M124T72_1	2.12559e+06	2.29777e+06	35.62	1.99375e+06	2.08151e+06	23.29	1.07	0.09	0.573737	0.24	0.794466	0.0878296	124.024	71.8	1.2
M124T808	1.85412e+07	1.90082e+07	43.04	2.01004e+07	2.0033e+07	44.4	0.92	-0.12	0.878477	0.06	0.952443	0.277015	124.087	808.5	13.5
M124T81	3.65725e+06	3.64954e+06	21.53	2.92081e+06	2.60851e+06	41.8	1.25	0.32	0.130381	0.88	0.362517	1.02055	123.928	80.9	1.3
M124T83_2	3.163e+06	3.04506e+06	20.9	3.75483e+06	3.67419e+06	14.23	0.84	-0.25	0.0498834	1.3	0.201689	1.2646	124.096	83.2	1.4
M124T91	852241	845947	9.99	807671	795231	9.33	1.06	0.08	0.234499	0.63	0.504207	0.73406	123.989	91.5	1.5
M125T122	1.03508e+07	9.23496e+06	44.83	6.39922e+06	7.37823e+06	34.92	1.62	0.69	0.0379176	1.42	0.171246	1.29838	125.06	121.9	2
M125T344	908554	565449	92.98	1.07411e+06	975550	66.78	0.85	-0.24	0.645377	0.19	0.837808	0.320857	125.071	344.1	5.7
M125T72	8.53541e+06	8.43981e+06	55.22	9.55852e+06	8.69364e+06	55.44	0.89	-0.16	0.720901	0.14	0.878065	0.35794	125.038	71.7	1.2
M125T81	7.18787e+07	8.85553e+07	60.64	2.9883e+07	2.11998e+07	70.12	2.41	1.27	0.0281274	1.55	0.141969	1.28773	124.923	80.9	1.3
M126T114_1	1.49648e+07	1.74945e+07	67.45	1.32213e+07	6.57938e+06	104.17	1.13	0.18	0.95913	0.02	0.985204	0.403132	126.022	113.6	1.9
M126T114_2	1.14564e+06	254634	151.95	2.13607e+06	1.4904e+06	104.09	0.54	-0.9	0.160528	0.79	0.408129	0.888128	126.055	114.2	1.9
M126T127	1.95331e+07	2.02045e+07	46.48	1.43684e+07	1.46602e+07	25.09	1.36	0.44	0.160528	0.79	0.408129	0.721429	126.022	127.4	2.1
M126T315	1.10706e+07	1.11268e+07	26.43	4.87541e+06	4.75946e+06	25.46	2.27	1.18	0.0003108	3.51	0.00894927	2.10594	126.037	314.8	5.2
M126T634	6.03181e+06	5.91123e+06	45.58	4.97116e+06	4.75293e+06	16.87	1.21	0.28	0.382284	0.42	0.64771	0.235349	125.985	633.9	10.6
M126T65	6.8727e+06	6.93715e+06	16.06	7.45192e+06	7.63049e+06	8.78	0.92	-0.12	0.441803	0.35	0.702485	0.782085	126.055	65.1	1.1
M126T72	1.4323e+08	1.4749e+08	8.7	1.40493e+08	1.45381e+08	16.57	1.02	0.03	0.95913	0.02	0.985204	0.190847	125.986	72.2	1.2
M126T75	1.53482e+08	1.59916e+08	29.19	1.55127e+08	1.46178e+08	23.54	0.99	-0.02	1	0	1	0.109781	126.102	74.7	1.2
M126T86	7.81136e+08	7.24184e+08	51.8	1.1118e+09	1.1471e+09	20.47	0.7	-0.51	0.0498834	1.3	0.201689	1.12684	126.022	85.7	1.4
M126T99	6.44426e+07	6.63791e+07	36.16	6.63271e+07	6.73833e+07	13.97	0.97	-0.04	0.798446	0.1	0.918313	0.413848	126.022	99.4	1.7
M127T101_1	3.77817e+06	3.75098e+06	22.41	5.79827e+06	6.11742e+06	34.46	0.65	-0.62	0.0498834	1.3	0.201689	1.29792	127.016	100.6	1.7
M127T101_2	1.64641e+07	1.92579e+07	47.18	8.46997e+06	7.41138e+06	70.11	1.94	0.96	0.014763	1.83	0.0952789	1.10047	127.039	101.1	1.7
M127T135	4.12369e+07	4.08645e+07	18.37	3.708e+07	3.67866e+07	14.93	1.11	0.15	0.328205	0.48	0.600385	0.827501	127.039	135.5	2.3
M127T244	3.65689e+06	3.64577e+06	8.88	3.05255e+06	3.00021e+06	10.05	1.2	0.26	0.004662	2.33	0.0475536	1.84857	127.05	244.2	4.1
M127T335	5.18742e+06	3.00598e+06	68.96	5.45449e+06	5.94414e+06	47.35	0.95	-0.07	0.798446	0.1	0.918313	0.375472	127.05	335	5.6
M127T552	1.41819e+06	1.3114e+06	73.04	1.23028e+06	1.18063e+06	86.26	1.15	0.21	0.720901	0.14	0.878065	0.482105	127.112	551.9	9.2
M127T604	223435	230194	48.03	276745	242071	49.54	0.81	-0.31	0.505361	0.3	0.749981	0.522029	127.016	603.6	10.1
M127T682	388961	205431	116.95	1.33983e+06	1.10903e+06	65.52	0.29	-1.78	0.0104118	1.98	0.0771942	1.59212	127.112	681.6	11.4
M127T72_1	1.68807e+06	1.58594e+06	49.21	1.14715e+06	563018	108.68	1.47	0.56	0.160528	0.79	0.408129	1.11921	126.595	72.4	1.2
M127T72_2	5.44027e+06	5.39085e+06	24.06	5.41698e+06	5.48713e+06	12.53	1	0.01	0.95913	0.02	0.985204	0.137906	126.99	72.3	1.2
M127T72_3	2.63676e+06	2.6654e+06	8.57	3.08789e+06	3.28959e+06	16.79	0.85	-0.23	0.014763	1.83	0.0952789	1.23673	127.003	71.6	1.2
M127T740	3.91012e+06	3.07801e+06	51.68	3.68808e+06	3.25903e+06	36.84	1.06	0.08	1	0	1	0.020979	126.972	740.3	12.3
M127T75	7.82475e+06	7.88762e+06	44.27	1.07398e+07	1.07015e+07	24.48	0.73	-0.46	0.0829837	1.08	0.275972	1.1812	127.106	74.7	1.2
M127T751	6.40215e+06	5.73519e+06	66.95	4.41348e+06	3.82595e+06	38.89	1.45	0.54	0.382284	0.42	0.64771	0.515214	126.972	751.5	12.5
M127T763	5.66722e+06	5.64225e+06	37.72	4.78683e+06	4.94738e+06	14.49	1.18	0.24	0.573737	0.24	0.794466	0.51563	126.972	763	12.7
M127T774	1.44227e+07	1.39659e+07	36.56	1.37628e+07	1.38736e+07	25.22	1.05	0.07	0.878477	0.06	0.952443	0.100405	126.972	774.3	12.9
M127T807	1.93504e+06	1.89812e+06	19.05	1.7204e+06	1.45159e+06	56.71	1.12	0.17	0.382284	0.42	0.64771	0.707196	126.972	807	13.4
M127T86	3.64806e+07	3.64349e+07	21.07	4.5873e+07	4.6516e+07	20.88	0.8	-0.33	0.0379176	1.42	0.171246	1.24196	127.025	85.7	1.4
M127T89	1.82318e+07	1.82477e+07	10.48	1.40076e+07	1.36462e+07	20.29	1.3	0.38	0.004662	2.33	0.0475536	1.67018	127.039	88.8	1.5
M128T36	1.69016e+06	1.67621e+06	26.21	1.52499e+06	1.52075e+06	24.89	1.11	0.15	0.573737	0.24	0.794466	0.556897	128.043	36	0.6
M128T364	3.34144e+06	3.21476e+06	23.65	2.17724e+06	2.10277e+06	46.34	1.53	0.62	0.0206682	1.68	0.117429	1.4673	128.143	364.5	6.1
M128T606	429084	434591	51.86	482956	456291	29.38	0.89	-0.17	0.573737	0.24	0.794466	0.605987	128.096	606	10.1
M128T72	3.30459e+08	3.12645e+08	23.23	2.72474e+08	3.01069e+08	30.27	1.21	0.28	0.382284	0.42	0.64771	0.840732	128.019	71.8	1.2
M128T86	4.18092e+07	4.21117e+07	20.42	4.63803e+07	4.44146e+07	16.54	0.9	-0.15	0.328205	0.48	0.600385	0.771324	128.018	85.7	1.4
M129T104_1	1.23339e+07	1.08706e+07	28.05	1.14234e+07	1.13518e+07	48.2	1.08	0.11	0.573737	0.24	0.794466	0.500626	129.055	104.2	1.7
M129T104_2	1.58721e+06	1.54703e+06	50	940185	810298	54.46	1.69	0.76	0.104895	0.98	0.317905	1.21571	129.074	104.2	1.7
M129T137	434509	367818	61.19	117829	104342	52.5	3.69	1.88	0.0029526	2.53	0.0361958	1.87774	128.951	137	2.3
M129T240	2.53896e+07	2.47309e+07	21.32	2.9059e+07	2.6403e+07	22.94	0.87	-0.19	0.382284	0.42	0.64771	0.719599	129.055	240.4	4
M129T260	2.18987e+07	2.26432e+07	61.12	2.27445e+07	2.00852e+07	55.3	0.96	-0.05	0.95913	0.02	0.985204	0.206616	129.055	259.9	4.3
M129T404	3.46158e+06	3.32494e+06	76.92	3.60944e+06	1.66154e+06	89.83	0.96	-0.06	1	0	1	0.0129646	129.055	404.1	6.7
M129T428	436617	33005.9	167.24	979654	818038	107.59	0.45	-1.17	0.95913	0.02	0.985204	0.202817	129.102	427.6	7.1
M129T599	3.07881e+06	2.53234e+06	71.91	2.25081e+06	2.06593e+06	65.51	1.37	0.45	0.328205	0.48	0.600385	0.760813	129.127	598.7	10
M129T67	781162	830850	25.33	868422	911589	23.24	0.9	-0.15	0.382284	0.42	0.64771	0.505878	129.139	66.9	1.1
M129T72	4.25314e+07	4.95107e+07	55.34	2.66408e+07	1.86128e+07	69.16	1.6	0.67	0.278632	0.55	0.551712	0.607198	129.02	71.7	1.2
M129T76	7.51166e+06	7501457	13.92	7.57023e+06	7.30517e+06	17.49	0.99	-0.01	0.645377	0.19	0.837808	0.0173484	129.102	76.3	1.3
M129T818	7.64443e+06	7.71575e+06	41.98	3.72981e+06	3.49303e+06	51.03	2.05	1.04	0.00699301	2.16	0.0602244	1.57538	129.127	817.7	13.6
M130T100	5.1711e+07	5.23382e+07	15.04	6.00768e+07	5.7675e+07	19.63	0.86	-0.22	0.160528	0.79	0.408129	0.987951	130.05	99.9	1.7
M130T121	2.67069e+07	2.41728e+07	29.18	2.38165e+07	2.40595e+07	17.93	1.12	0.17	0.720901	0.14	0.878065	0.616116	130.086	120.9	2
M130T123	4.98455e+07	4.4022e+07	35.21	9.21213e+07	9.29888e+07	35.87	0.54	-0.89	0.004662	2.33	0.0475536	1.6983	130.05	122.7	2
M130T155	6.92665e+07	6.67523e+07	71.8	7.70341e+07	3.293e+07	104.21	0.9	-0.15	0.95913	0.02	0.985204	0.248201	130.05	155.2	2.6
M130T260	1.3245e+06	1.2883e+06	11.17	1.14053e+06	1.14258e+06	10.44	1.16	0.22	0.0379176	1.42	0.171246	1.50957	130.059	259.6	4.3
M130T397	3.97137e+06	3.62699e+06	60.18	3.67623e+06	3.20305e+06	46.11	1.08	0.11	1	0	1	0.019215	130.065	397.2	6.6
M130T435	485729	417101	33.72	249968	234350	62	1.94	0.96	0.0206682	1.68	0.117429	1.45102	130.123	434.5	7.2
M130T442	9.5641e+07	9.72431e+07	36.93	6.63812e+07	6.80102e+07	21.36	1.44	0.53	0.0649573	1.19	0.238167	1.13668	130.159	441.5	7.4
M130T613	663322	468668	80.71	1.24102e+06	684340	123.92	0.53	-0.9	0.130381	0.88	0.362517	0.790452	130.123	612.7	10.2
M130T72_1	3.90557e+06	3.96125e+06	17.93	2.88504e+06	3.15888e+06	40.6	1.35	0.44	0.0829837	1.08	0.275972	1.24853	129.979	72	1.2
M130T72_2	2.40024e+07	1.38172e+07	99.52	5.25565e+07	4.53191e+07	41.84	0.46	-1.13	0.0104118	1.98	0.0771942	1.60364	130.017	71.7	1.2
M130T76	9.71131e+07	8.9044e+07	57.65	1.69793e+08	1.76965e+08	14.07	0.57	-0.81	0.0029526	2.53	0.0361958	1.55899	130.086	76.3	1.3
M130T815	2.90474e+08	2.83086e+08	56.98	1.49081e+08	1.33527e+08	74.93	1.95	0.96	0.104895	0.98	0.317905	1.07921	130.159	815.2	13.6
M130T817	1.0909e+08	1.00096e+08	31.68	8.96556e+07	9.02491e+07	12.86	1.22	0.28	0.234499	0.63	0.504207	0.906106	130.049	816.6	13.6
M130T838	6.36319e+07	6.05468e+07	24.95	5.25548e+07	5.22662e+07	15.39	1.21	0.28	0.0498834	1.3	0.201689	1.12589	130.049	838.1	14
M130T839	1.52321e+08	1.69255e+08	37.35	7.25081e+07	6.68031e+07	80.32	2.1	1.07	0.014763	1.83	0.0952789	1.33556	130.159	838.8	14
M130T86	7.79375e+08	7.83148e+08	6.87	8.08165e+08	8.04836e+08	6.39	0.96	-0.05	0.382284	0.42	0.64771	0.670409	130.05	85.7	1.4
M130T99	2.87364e+06	2.93349e+06	48.11	6.54196e+06	5.6964e+06	63.06	0.44	-1.19	0.0829837	1.08	0.275972	1.40519	130.086	99.4	1.7
M131T114	1.50198e+06	1.57139e+06	39.64	1.83336e+06	1.66727e+06	57.88	0.82	-0.29	0.573737	0.24	0.794466	0.239372	131	114.3	1.9
M131T116	407377	395725	25.56	570263	537041	15.19	0.71	-0.49	0.004662	2.33	0.0475536	1.715	130.602	115.9	1.9
M131T123	1.57177e+06	875608	100.54	1.89668e+06	1.72109e+06	64.25	0.83	-0.27	0.505361	0.3	0.749981	0.688151	131.053	123.3	2.1
M131T155	6.50356e+06	6.30864e+06	7.9	6.64128e+06	6.73337e+06	17.17	0.98	-0.03	0.720901	0.14	0.878065	0.0666927	131.053	155.3	2.6
M131T338	42711731	4.034e+07	33.76	4.11022e+07	4.35275e+07	41.63	1.04	0.06	0.878477	0.06	0.952443	0.316907	131.049	338.4	5.6
M131T35	6.87387e+06	6.97976e+06	9.45	5.10344e+06	5.20981e+06	14.16	1.35	0.43	0.000621601	3.21	0.0140919	1.99114	130.966	34.9	0.6
M131T474	1.06861e+07	9.81145e+06	39.21	9.00922e+06	8.39377e+06	28.29	1.19	0.25	0.382284	0.42	0.64771	0.550908	131.081	473.9	7.9
M131T550	3.0395e+06	3.37305e+06	48.67	1.0572e+06	745464	79.13	2.88	1.52	0.00699301	2.16	0.0602244	1.60696	131.085	550.1	9.2
M131T65	5.3886e+06	4.81958e+06	80.59	9.90778e+06	4.31374e+06	115.07	0.54	-0.88	1	0	1	0.0343228	130.966	65.1	1.1
M131T72_1	441297	267164	80.05	922249	812171	94.99	0.48	-1.06	0.234499	0.63	0.504207	1.07623	130.522	71.9	1.2
M131T72_2	1.37243e+06	1.36858e+06	20.89	1.20674e+06	1.30762e+06	41.63	1.14	0.19	0.878477	0.06	0.952443	0.639687	131.02	71.8	1.2
M131T751	3.32958e+06	2.74295e+06	46.81	1.87969e+06	1.19179e+06	63.37	1.77	0.82	0.104895	0.98	0.317905	1.31678	130.522	751.1	12.5
M131T76	8.55858e+06	8.34966e+06	24.57	8.04325e+06	8.0191e+06	41.97	1.06	0.09	1	0	1	0.476967	131.09	76.3	1.3
M131T800	1.76967e+07	1.77692e+07	30.29	2.2233e+07	2.2548e+07	30.84	0.8	-0.33	0.278632	0.55	0.551712	0.892577	130.522	799.9	13.3
M131T86	5.90875e+07	6.29899e+07	36.74	6.88717e+07	6.11684e+07	47.38	0.86	-0.22	0.573737	0.24	0.794466	0.387713	131.053	85.6	1.4
M131T89	1.85009e+06	1.76566e+06	33.32	1.23989e+06	1.44566e+06	44.13	1.49	0.58	0.0498834	1.3	0.201689	1.03749	131.034	88.6	1.5
M132T128	6.00293e+07	3.21722e+07	81.24	1.78988e+07	1.78353e+07	40.69	3.35	1.75	0.014763	1.83	0.0952789	1.5784	132.077	127.6	2.1
M132T144	3.45244e+07	3.60135e+07	67.23	1.82734e+07	1.60733e+07	57.29	1.89	0.92	0.194872	0.71	0.457172	0.593645	132.077	143.9	2.4
M132T148	1.23555e+09	1.14424e+09	25.11	1.30368e+09	1.217e+09	15.98	0.95	-0.08	0.328205	0.48	0.600385	0.492096	132.102	148.3	2.5
M132T188	1.32175e+06	1.3975e+06	38.06	1.69416e+06	1.64802e+06	25.62	0.78	-0.36	0.160528	0.79	0.408129	0.861577	132.012	188.2	3.1
M132T189_1	1.51726e+10	1.31987e+10	84.46	2.6974e+10	1.21515e+10	110.2	0.56	-0.83	0.720901	0.14	0.878065	0.425583	132.102	188.6	3.1
M132T189_2	1.31294e+06	1.26303e+06	11.88	1.29443e+06	1.2727e+06	6.21	1.01	0.02	0.720901	0.14	0.878065	0.14929	132.191	189.4	3.2
M132T202	3.37864e+06	2.01287e+06	87.42	6.52054e+06	6.57839e+06	60.02	0.52	-0.95	0.0379176	1.42	0.171246	1.15185	132.066	201.8	3.4
M132T222	1.56982e+09	1.50951e+09	34.3	1.69931e+09	1.54231e+09	34.4	0.92	-0.11	0.720901	0.14	0.878065	0.32582	132.102	222.2	3.7
M132T338	1.58182e+06	1.69495e+06	29.91	1.82726e+06	1.85849e+06	26.17	0.87	-0.21	0.505361	0.3	0.749981	0.649674	132.053	338.4	5.6
M132T339	8.33048e+06	8.22899e+06	30.36	5.77321e+06	6.19158e+06	31.8	1.44	0.53	0.0649573	1.19	0.238167	1.10999	132.077	338.8	5.6
M132T397	5.13211e+06	2.56536e+06	96.72	2.90319e+06	2.16946e+06	98.16	1.77	0.82	0.328205	0.48	0.600385	0.799494	132.078	397.2	6.6
M132T76	200938	159794	43.02	235280	261061	31.8	0.85	-0.23	0.505361	0.3	0.749981	0.628103	132.091	76.1	1.3
M132T770	1.21451e+07	1.26734e+07	19.66	9.438e+06	9.80152e+06	22.35	1.29	0.36	0.0498834	1.3	0.201689	1.28545	132.077	769.8	12.8
M132T86	6.07673e+06	5.85921e+06	45.78	6.59487e+06	5.49796e+06	46.77	0.92	-0.12	0.798446	0.1	0.918313	0.317077	132.054	85.6	1.4
M132T87	1.51775e+07	1.50044e+07	4.2	1.50476e+07	1.50302e+07	2.75	1.01	0.01	0.645377	0.19	0.837808	0.283774	132.065	87	1.4
M132T94_1	1.83773e+07	1.85944e+07	8.69	1.9575e+07	1.8104e+07	20.44	0.94	-0.09	0.720901	0.14	0.878065	0.410699	131.987	94.4	1.6
M132T94_2	2.53627e+10	2.53124e+10	2.1	2.27018e+10	2.37491e+10	11.37	1.12	0.16	0.0029526	2.53	0.0361958	1.44838	132.077	94.4	1.6
M132T94_3	7.67045e+06	6.9624e+06	24.48	4.43109e+06	4.55605e+06	31.72	1.73	0.79	0.0010878	2.96	0.0203124	1.75517	132.118	94.3	1.6
M132T94_4	1.44261e+07	1.38116e+07	12.05	1.34145e+07	1.34195e+07	4.13	1.08	0.1	0.194872	0.71	0.457172	0.915627	132.166	94.4	1.6
M132T99	510680	440830	49.18	429370	447611	27.55	1.19	0.25	0.95913	0.02	0.985204	0.459274	132.048	99.1	1.7
M133T114	1.46874e+07	1.47002e+07	24.63	1.44795e+07	1.49223e+07	18.08	1.01	0.02	1	0	1	0.0390709	133.08	114.2	1.9
M133T122	7.34775e+07	8.97093e+07	60.66	6.2578e+07	6.22808e+07	96.3	1.17	0.23	0.878477	0.06	0.952443	0.460177	133.032	121.7	2
M133T140	2.93864e+06	2.06051e+06	79.61	3.00849e+06	3.07771e+06	51.83	0.98	-0.03	0.720901	0.14	0.878065	0.238712	133.032	139.8	2.3
M133T148	1.29039e+08	1.20885e+08	60.54	6.98852e+07	5.92472e+07	74.77	1.85	0.88	0.194872	0.71	0.457172	0.8607	133.105	148.2	2.5
M133T189	2.04512e+08	1.93449e+08	68.82	1.5836e+08	1.76648e+08	60.86	1.29	0.37	0.505361	0.3	0.749981	0.444748	133.105	188.7	3.1
M133T222	1.42242e+08	1.50314e+08	59.03	1.33167e+08	1.2954e+08	20.79	1.07	0.1	0.798446	0.1	0.918313	0.32314	133.105	222.1	3.7
M133T280	1.95003e+06	1.57109e+06	84.27	2.87892e+06	3.08693e+06	40.12	0.68	-0.56	0.278632	0.55	0.551712	0.961567	133.049	279.6	4.7
M133T353	2.7241e+06	2.34021e+06	46.53	2.20781e+06	1.52072e+06	71.9	1.23	0.3	0.328205	0.48	0.600385	0.733026	133.086	353.3	5.9
M133T72	2.87499e+06	2.95651e+06	10.19	2.63472e+06	2.50742e+06	15.3	1.09	0.13	0.234499	0.63	0.504207	0.894373	132.998	71.8	1.2
M133T742	919426	737861	43.75	742852	656766	39.83	1.24	0.31	0.328205	0.48	0.600385	0.656279	133.101	742.5	12.4
M133T768	927065	838235	65.71	2.50498e+06	2.68363e+06	32.29	0.37	-1.43	0.0010878	2.96	0.0203124	1.79638	133.101	767.6	12.8
M133T85	4.76379e+07	5.32024e+07	34.79	4.44903e+07	4.45311e+07	9.53	1.07	0.1	0.160528	0.79	0.408129	0.0453529	133.061	84.6	1.4
M133T94	1.20482e+09	1.1757e+09	14.08	8.21451e+08	7.99004e+08	8.02	1.47	0.55	0.0001554	3.81	0.00610078	2.14903	133.08	94.3	1.6
M134T101	25883639	2.58336e+07	38.65	1.59943e+07	1.60275e+07	51.3	1.62	0.69	0.104895	0.98	0.317905	1.09718	134.027	100.9	1.7
M134T108	580928	553068	48.44	677228	425576	109.46	0.86	-0.22	0.798446	0.1	0.918313	0.285598	134.118	108.4	1.8
M134T122	2.95183e+06	3.07042e+06	35.64	5.59942e+06	5.78729e+06	22.99	0.53	-0.92	0.0018648	2.73	0.0275628	1.73062	134.035	121.6	2
M134T155	2.50711e+06	2.56812e+06	18.85	2.07072e+06	2.15895e+06	25.26	1.21	0.28	0.194872	0.71	0.457172	0.984646	133.515	155.3	2.6
M134T189	1.03091e+07	9.97027e+06	36.93	4.53202e+06	4.54794e+06	16.88	2.27	1.19	0.0001554	3.81	0.00610078	2.01648	134.107	189.3	3.2
M134T222	8.47337e+06	6.87236e+06	40.68	3.81788e+06	4.19169e+06	27.14	2.22	1.15	0.0001554	3.81	0.00610078	1.97656	134.107	222.4	3.7
M134T384	644085	636318	33.81	791440	635838	45.58	0.81	-0.3	0.382284	0.42	0.64771	0.6217	134.063	384.2	6.4
M134T76	413414	426977	40.9	127323	103129	43.23	3.25	1.7	0.000621601	3.21	0.0140919	2.03163	134.101	76	1.3
M134T85	3.10764e+08	2.37583e+08	89.7	6.2297e+08	5.79238e+08	33.45	0.5	-1	0.0498834	1.3	0.201689	1.46426	134.045	85.2	1.4
M134T94	9.78216e+07	9.74287e+07	17.23	9.36019e+07	9.67033e+07	12.2	1.05	0.06	0.798446	0.1	0.918313	0.270722	134.081	94.3	1.6
M135T454	84882.9	43967.5	114.45	126681	51620.9	122	0.67	-0.58	0.328205	0.48	0.600385	0.528476	134.999	454	7.6
M135T485	157558	171319	40.8	135686	26631.1	159.63	1.16	0.22	0.130381	0.88	0.362517	1.15325	135.081	485	8.1
M135T612	138015	131352	44.35	136977	125041	25.74	1.01	0.01	0.878477	0.06	0.952443	0.15622	135.117	611.6	10.2
M135T624	4.28562e+06	4.32512e+06	29.18	3.3591e+06	3.46318e+06	32.99	1.28	0.35	0.160528	0.79	0.408129	0.822957	135.08	624.1	10.4
M135T742	6.43985e+06	6.21455e+06	49.74	8.51882e+06	7.35973e+06	63.05	0.76	-0.4	0.645377	0.19	0.837808	0.358838	135.08	741.6	12.4
M135T79	1.08631e+06	1.06253e+06	10.04	1.013e+06	1.00148e+06	22.61	1.07	0.1	0.573737	0.24	0.794466	0.589879	135.003	78.7	1.3
M135T801	1.28614e+06	1.23168e+06	39.86	745057	512996	71.58	1.73	0.79	0.0649573	1.19	0.238167	1.3229	135.081	801.4	13.4
M135T812	1.96292e+06	1.869e+06	30.85	2.07903e+06	1.743e+06	34.33	0.94	-0.08	0.95913	0.02	0.985204	0.245996	135.08	811.7	13.5
M135T85	1.44613e+07	1.43967e+07	30.54	1.38491e+07	1.34054e+07	10.43	1.04	0.06	1	0	1	0.0142706	135.048	85.2	1.4
M135T90	3.19477e+06	2.88112e+06	35.73	1.87673e+06	1.87588e+06	40.69	1.7	0.77	0.0018648	2.73	0.0275628	1.30999	135.065	90.1	1.5
M136T100	1.41179e+07	1.35211e+07	34.52	1.11764e+07	1.06508e+07	44.81	1.26	0.34	0.328205	0.48	0.600385	0.828932	136.062	99.6	1.7
M136T101	1.35298e+06	1.33028e+06	23.72	1.38314e+06	1.05303e+06	53.8	0.98	-0.03	0.505361	0.3	0.749981	0.277971	136.023	100.9	1.7
M136T105	1.49586e+06	1.18921e+06	67.78	327777	243943	76.53	4.56	2.19	0.000621601	3.21	0.0140919	1.90828	136.043	104.8	1.7
M136T119	8.79322e+07	9.57039e+07	65.97	9.49839e+07	7.17312e+07	88.44	0.93	-0.11	0.95913	0.02	0.985204	0.0479743	136.062	119	2
M136T124	5.62381e+07	4.92588e+07	22.1	4.50295e+07	4.48981e+07	11.26	1.25	0.32	0.014763	1.83	0.0952789	1.37319	136.076	124.4	2.1
M136T139	3.42579e+07	3.41854e+07	11.77	1.30258e+07	1.08617e+07	49.02	2.63	1.4	0.0001554	3.81	0.00610078	2.11776	136.076	139.4	2.3
M136T191	1.78349e+07	1.71449e+07	17.81	1.59617e+07	1.55507e+07	12.95	1.12	0.16	0.194872	0.71	0.457172	0.882227	136.076	190.8	3.2
M136T334	2.27548e+06	1.24889e+06	89.9	5.99963e+06	2.99716e+06	138.47	0.38	-1.4	0.104895	0.98	0.317905	1.06065	136.062	333.8	5.6
M136T385	7.21185e+06	7.6159e+06	63.63	9.04345e+06	8.9822e+06	67.1	0.8	-0.33	0.441803	0.35	0.702485	0.434341	136.063	385.2	6.4
M136T478	2.47661e+06	2.45262e+06	41.11	3.15475e+06	2.90742e+06	51.15	0.79	-0.35	0.505361	0.3	0.749981	0.436634	136.076	478.5	8
M136T662	2.61867e+06	2.36094e+06	32.18	3.53986e+06	3.32816e+06	23.16	0.74	-0.43	0.0379176	1.42	0.171246	1.28955	136.022	662.3	11
M136T771	3.815e+06	3.74163e+06	63.57	4.80845e+06	4.84518e+06	34.89	0.79	-0.33	0.441803	0.35	0.702485	0.773567	136.048	770.6	12.8
M136T92	2.64732e+06	2.61186e+06	28.54	1.81752e+06	1.76586e+06	15.41	1.46	0.54	0.0206682	1.68	0.117429	1.53158	136.048	91.8	1.5
M137T119	5.58137e+06	5.38423e+06	71.21	9.27386e+06	7.78986e+06	33.19	0.6	-0.73	0.160528	0.79	0.408129	1.29567	137.065	118.8	2
M137T125	3.24659e+06	3.19223e+06	32.53	4.92672e+06	5.16742e+06	31.92	0.66	-0.6	0.0206682	1.68	0.117429	1.30802	137.079	124.7	2.1
M137T139	839134	761994	28.97	897993	833353	20.8	0.93	-0.1	0.278632	0.55	0.551712	0.441049	137.079	139.1	2.3
M137T146_1	5.83606e+06	5.88476e+06	43.73	5.18419e+06	5.08164e+06	54.48	1.13	0.17	0.441803	0.35	0.702485	0.389763	136.951	145.7	2.4
M137T146_2	3.04016e+09	2.9611e+09	12.01	2.43217e+09	2.37999e+09	13.59	1.25	0.32	0.0104118	1.98	0.0771942	1.72383	137.046	145.7	2.4
M137T146_3	1.07547e+06	1.06065e+06	28.17	1.18594e+06	1.03081e+06	24.6	0.91	-0.14	0.573737	0.24	0.794466	0.560665	137.141	146.1	2.4
M137T191	1.25997e+06	861004	67.17	1.36649e+06	1.31457e+06	42.34	0.92	-0.12	0.573737	0.24	0.794466	0.421408	137.079	191.2	3.2
M137T193	7.4892e+06	6.98451e+06	26.64	6.44632e+06	6.30053e+06	14.31	1.16	0.22	0.382284	0.42	0.64771	0.7526	137.06	192.8	3.2
M137T259	5.55119e+06	4.87864e+06	38.98	5.3883e+06	5.25648e+06	21.43	1.03	0.04	0.798446	0.1	0.918313	0.0689167	137.06	258.6	4.3
M137T280_2	2.2919e+09	2.03064e+09	35.48	1.93608e+09	1.95443e+09	12.83	1.18	0.24	0.194872	0.71	0.457172	0.840524	137.046	280.1	4.7
M137T280_3	1.21524e+06	1.06366e+06	27.54	1.20302e+06	1.20535e+06	27.75	1.01	0.01	0.95913	0.02	0.985204	0.139306	137.14	279.6	4.7
M137T306	4.70106e+07	4.26909e+07	39.97	4.29316e+07	4.8009e+07	20.9	1.1	0.13	0.878477	0.06	0.952443	0.271948	137.046	306.4	5.1
M137T385	419729	377805	45.85	157574	150438	24.32	2.66	1.41	0.0001554	3.81	0.00610078	2.09983	137.065	385.2	6.4
M137T517	1012910	948914	20.65	616926	736433	59.36	1.64	0.72	0.014763	1.83	0.0952789	1.09864	137.096	516.8	8.6
M137T65	2.34719e+06	2.09692e+06	29.46	2.24927e+06	1.75714e+06	58.65	1.04	0.06	0.234499	0.63	0.504207	0.421089	137.132	64.9	1.1
M137T88	1.7731e+06	1.71721e+06	13.09	1.08432e+06	949532	45.72	1.64	0.71	0.004662	2.33	0.0475536	1.69852	137.071	88.5	1.5
M138T100	1.00326e+07	9.96547e+06	19.17	9.53223e+06	9.65318e+06	18.06	1.05	0.07	0.720901	0.14	0.878065	0.337426	138.055	100.1	1.7
M138T121	1.90926e+07	2.05152e+07	44.98	1.75848e+07	1.68532e+07	30.88	1.09	0.12	0.505361	0.3	0.749981	0.168654	138.066	121.4	2
M138T130	1.63462e+07	1.6538e+07	13.51	1.41402e+07	1.41411e+07	12.11	1.16	0.21	0.0649573	1.19	0.238167	1.20705	137.987	129.6	2.2
M138T180	2.0157e+08	1.91176e+08	15.83	1.42877e+08	1.41105e+08	16.54	1.41	0.5	0.0010878	2.96	0.0203124	1.92843	138.049	180	3
M138T34	4.13516e+07	4.60631e+07	38.16	4.867e+07	5.17018e+07	45.54	0.85	-0.24	0.441803	0.35	0.702485	0.36941	137.986	33.7	0.6
M138T400	2.58351e+06	2.72545e+06	72.16	353619	300671	62.82	7.31	2.87	0.0010878	2.96	0.0203124	1.95844	138.023	399.6	6.7
M138T65	5.02426e+07	5.30087e+07	42.21	5.65649e+07	6.04835e+07	24.12	0.89	-0.17	0.720901	0.14	0.878065	0.550606	137.986	64.9	1.1
M138T66	9.19654e+06	7.86275e+06	82.2	1.27239e+07	1.43812e+07	51.51	0.72	-0.47	0.720901	0.14	0.878065	0.759627	138.065	65.8	1.1
M139T100	180651	188951	50.83	195477	202703	38.93	0.92	-0.11	0.720901	0.14	0.878065	0.28313	139.058	100	1.7
M139T106	498971	429219	39.34	380494	404913	31.77	1.31	0.39	0.278632	0.55	0.551712	0.861642	139.042	105.9	1.8
M139T108	1.16784e+06	1.02797e+06	59.73	1.62905e+06	1.76146e+06	28.22	0.72	-0.48	0.194872	0.71	0.457172	1.04321	139.087	107.9	1.8
M139T122	8.47113e+06	8.78624e+06	56.54	5.99491e+06	4.94793e+06	48.79	1.41	0.5	0.645377	0.19	0.837808	0.579822	139.05	121.6	2
M139T130	1.33362e+07	1.38148e+07	31.85	1.48211e+07	7.919e+06	99.91	0.9	-0.15	0.328205	0.48	0.600385	0.280635	138.986	129.6	2.2
M139T146	1.12207e+07	1.09283e+07	21.73	8.97964e+06	8.77366e+06	36.32	1.25	0.32	0.234499	0.63	0.504207	1.02011	139.05	145.7	2.4
M139T180	7.14234e+06	6.34586e+06	61.1	5.77514e+06	5.304e+06	26.5	1.24	0.31	0.878477	0.06	0.952443	0.0389278	139.051	180.3	3
M139T280	3.24603e+06	2.98011e+06	85.05	1.08447e+07	1.22921e+07	45.55	0.3	-1.74	0.004662	2.33	0.0475536	1.56688	139.05	280.1	4.7
M139T371	790251	244855	146.26	1.13666e+06	1.03161e+06	90.5	0.7	-0.52	0.573737	0.24	0.794466	0.466869	139.087	371	6.2
M139T65	3.09069e+06	3.60961e+06	46.33	3.19867e+06	3.01995e+06	47.19	0.97	-0.05	0.798446	0.1	0.918313	0.0818089	139.112	64.8	1.1
M139T710	2.27903e+06	2.39683e+06	18.4	2.69215e+06	2.68494e+06	13.76	0.85	-0.24	0.0281274	1.55	0.141969	1.16891	139.112	710.4	11.8
M139T74	2.42364e+06	2.43322e+06	42.3	3.33238e+06	3.23127e+06	23.63	0.73	-0.46	0.0649573	1.19	0.238167	1.21627	139.098	73.5	1.2
M140T111	1.42352e+07	1.4412e+07	18.84	9.6248e+06	9.28065e+06	33.03	1.48	0.56	0.014763	1.83	0.0952789	1.59413	140.082	111.1	1.9
M140T114_1	933927	203799	125.66	1.06573e+06	582437	150.8	0.88	-0.19	0.720901	0.14	0.878065	0.291513	140.005	114.3	1.9
M140T114_2	1.49357e+06	1.47061e+06	38.83	1.49167e+06	1.12854e+06	106.71	1	0	0.328205	0.48	0.600385	0.65849	140.071	113.6	1.9
M140T130	3.84777e+07	3.89361e+07	51.69	3.21091e+07	2.94372e+07	64.71	1.2	0.26	0.328205	0.48	0.600385	0.442567	139.982	130	2.2
M140T160	4.661e+07	5.02192e+07	29.83	5.35069e+07	5.21403e+07	22.56	0.87	-0.2	0.441803	0.35	0.702485	0.768557	139.981	160	2.7
M140T194	1.49559e+08	1.45858e+08	32.49	1.60593e+08	1.48742e+08	43.33	0.93	-0.1	1	0	1	0.279511	139.98	194.5	3.2
M140T233	1.88954e+08	1.93759e+08	13.31	2.59827e+08	1.96737e+08	47.34	0.73	-0.46	0.328205	0.48	0.600385	1.00739	139.984	232.5	3.9
M140T250	1.21972e+08	1.17343e+08	18.36	1.83908e+08	1.78652e+08	18.88	0.66	-0.59	0.000621601	3.21	0.0140919	1.9878	139.98	250	4.2
M140T267	2.61495e+08	2.28561e+08	81.12	7.25139e+07	7.00772e+07	34.83	3.61	1.85	0.0829837	1.08	0.275972	1.3575	139.981	266.5	4.4
M140T287	2.74403e+09	3.52713e+09	56.28	1.92976e+09	1.90083e+09	95.16	1.42	0.51	0.505361	0.3	0.749981	0.654863	139.981	287.4	4.8
M140T299	7.00409e+07	4.98216e+07	83.06	5.44669e+07	5.02488e+07	70.42	1.29	0.36	0.720901	0.14	0.878065	0.367997	139.984	299.4	5
M140T348	24668564	2.69298e+07	47.58	2.50197e+07	2.38655e+07	45.61	0.99	-0.02	0.95913	0.02	0.985204	0.029327	139.984	348	5.8
M140T364	5.43984e+06	5.19363e+06	44.5	6.18545e+06	5.05005e+06	57.23	0.88	-0.19	0.798446	0.1	0.918313	0.261881	140.07	364.3	6.1
M140T387	1.25917e+06	1.22848e+06	28.8	1.56541e+06	1.67357e+06	46.09	0.8	-0.31	0.328205	0.48	0.600385	0.398748	140.143	386.7	6.4
M140T405	1.45909e+07	8.83791e+06	91.52	2.72366e+07	2.31914e+07	57.19	0.54	-0.9	0.0379176	1.42	0.171246	1.31476	139.984	404.6	6.7
M140T472	2.85476e+07	2.74612e+07	18.18	2.85228e+07	2.85984e+07	23.73	1	0	0.95913	0.02	0.985204	0.0491969	139.981	472.3	7.9
M140T493	8.40261e+06	7.75785e+06	38.09	9.96745e+06	9.6481e+06	32.09	0.84	-0.25	0.441803	0.35	0.702485	0.733816	139.984	493.4	8.2
M140T506	1.3567e+07	1.11998e+07	36.41	1.0942e+07	1.10411e+07	26.22	1.24	0.31	0.382284	0.42	0.64771	0.822443	139.98	506.3	8.4
M140T540	16459984	1.4383e+07	48.34	1.47096e+07	1.35767e+07	27.67	1.12	0.16	1	0	1	0.234145	139.98	539.7	9
M140T557	9.10725e+06	8.81308e+06	38.33	9.72313e+06	8.78802e+06	44.36	0.94	-0.09	0.798446	0.1	0.918313	0.147098	139.98	557.2	9.3
M140T575	1.24402e+07	1.13553e+07	22.37	6.59739e+06	5.74915e+06	42.32	1.89	0.92	0.004662	2.33	0.0475536	1.9223	139.981	575.5	9.6
M140T593	1.65486e+06	1.19955e+06	84.04	7.32821e+06	4.41865e+06	88.82	0.23	-2.15	0.0018648	2.73	0.0275628	1.69614	139.98	593.4	9.9
M140T609	4.64785e+06	4.68133e+06	50.15	5.66386e+06	5.31426e+06	26.08	0.82	-0.29	0.441803	0.35	0.702485	0.83151	139.98	608.7	10.1
M140T619	1.61636e+06	1.53941e+06	38.48	1.32534e+06	1.42235e+06	49.45	1.22	0.29	0.382284	0.42	0.64771	0.701748	139.98	619.4	10.3
M140T69	8.38498e+06	8.2384e+06	18.2	6.60882e+06	6.74141e+06	8.84	1.27	0.34	0.00699301	2.16	0.0602244	1.57108	139.963	68.9	1.1
M140T72_1	1.50259e+06	1.5753e+06	25.69	1.2707e+06	1.43826e+06	42.96	1.18	0.24	0.441803	0.35	0.702485	0.671447	139.527	71.8	1.2
M140T74	352041	339796	91.77	625892	606646	11.31	0.56	-0.83	0.441803	0.35	0.702485	1.40634	140.143	74.4	1.2
M140T752	1.25663e+06	1.51893e+06	57.99	1.18666e+06	1.00157e+06	85.42	1.06	0.08	0.798446	0.1	0.918313	0.394216	140.068	752.1	12.5
M140T77	1.27509e+06	1.2469e+06	11.17	1.0855e+06	1.08124e+06	5.62	1.17	0.23	0.0001554	3.81	0.00610078	1.76872	140.068	76.8	1.3
M140T770	1.13943e+07	1.2017e+07	58.2	9.15444e+06	9.52315e+06	43.57	1.24	0.32	0.645377	0.19	0.837808	0.274449	140.068	770.3	12.8
M140T778	5.51541e+06	5.70308e+06	40.85	4.37194e+06	4.06171e+06	39.72	1.26	0.34	0.234499	0.63	0.504207	0.668958	140.068	778.3	13
M140T806	7.3136e+07	6.28323e+07	36.78	4.79522e+07	5.07041e+07	32.93	1.53	0.61	0.0829837	1.08	0.275972	1.28983	139.988	805.7	13.4
M141T103	7.90542e+07	7.7769e+07	16.01	8.35403e+07	7.35048e+07	34.28	0.95	-0.08	0.878477	0.06	0.952443	0.158048	141.066	103.4	1.7
M141T104	1.17661e+06	1.16244e+06	34.46	1.74277e+06	1.49134e+06	28.81	0.68	-0.57	0.0281274	1.55	0.141969	1.46327	140.995	103.6	1.7
M141T111	298745	327354	37.83	165189	158823	40.23	1.81	0.85	0.0206682	1.68	0.117429	1.45128	141.085	111.2	1.9
M141T130	8.57043e+06	8.16762e+06	16.88	8.96468e+06	8.80036e+06	14.56	0.96	-0.06	0.505361	0.3	0.749981	0.352922	140.981	129.5	2.2
M141T34	1.38345e+07	1.43237e+07	11.86	1.4426e+07	1.41525e+07	14.32	0.96	-0.06	0.573737	0.24	0.794466	0.401115	140.984	34.2	0.6
M141T364	157605	124480	95.67	358974	370568	69.27	0.44	-1.19	0.0281274	1.55	0.141969	1.08798	141.074	364.4	6.1
M141T398	2.31498e+06	2.01811e+06	42.47	2.02602e+06	2.11114e+06	27.3	1.14	0.19	0.878477	0.06	0.952443	0.287771	141.139	398.2	6.6
M141T400	2.39667e+06	2.12154e+06	34.13	2.73129e+06	2.80801e+06	23.71	0.88	-0.19	0.441803	0.35	0.702485	0.640677	141.01	399.5	6.7
M141T64	1.75601e+07	1.741e+07	3.42	1.60225e+07	1.7824e+07	26.83	1.1	0.13	0.645377	0.19	0.837808	0.767748	140.984	63.6	1.1
M141T679	499675	491349	67.3	858950	801547	44.57	0.58	-0.78	0.130381	0.88	0.362517	1.12851	141.066	679.1	11.3
M141T72_2	1.3261e+07	1.24256e+07	24.52	1.22031e+07	1.30021e+07	20.01	1.09	0.12	1	0	1	0.495595	141.051	71.8	1.2
M141T728	937840	841504	35.22	748257	784136	55.01	1.25	0.33	0.573737	0.24	0.794466	0.816518	141.091	727.9	12.1
M141T770	1.86908e+06	1.91956e+06	21.65	1.63584e+06	1.66267e+06	14.02	1.14	0.19	0.194872	0.71	0.457172	0.804043	141.091	769.7	12.8
M141T807	3.85333e+06	3.56378e+06	40.23	3.18725e+06	2.7677e+06	47.37	1.21	0.27	0.441803	0.35	0.702485	0.64802	140.994	807.3	13.5
M142T103_1	3.58191e+06	3.52823e+06	47.44	4.32013e+06	5.12797e+06	54.94	0.83	-0.27	0.573737	0.24	0.794466	0.0107663	142.069	103.4	1.7
M142T129	1.07637e+07	1.00203e+07	46.78	1.44737e+07	9.73901e+06	80.97	0.74	-0.43	1	0	1	0.359881	141.979	129.4	2.2
M142T135	3.415e+07	3.1151e+07	54.03	1.62582e+07	1.48139e+07	28.87	2.1	1.07	0.00699301	2.16	0.0602244	1.57606	141.958	135.1	2.3
M142T275	9944339	9.55932e+06	19.03	7.98303e+06	8.88571e+06	22.92	1.25	0.32	0.130381	0.88	0.362517	1.22479	141.957	275.2	4.6
M142T287	5.2266e+06	260045	183.28	1.07362e+07	7.46971e+06	107.88	0.49	-1.04	0.278632	0.55	0.551712	0.761294	141.959	287.4	4.8
M142T310	481855	1726.37	178.35	967875	807635	109.47	0.5	-1.01	0.160528	0.79	0.408129	0.508367	142.123	310.1	5.2
M142T34	2.84032e+07	2.6153e+07	14.98	2.06553e+07	2.26519e+07	39.91	1.38	0.46	0.0829837	1.08	0.275972	1.27569	141.978	34.2	0.6
M142T35	8.13774e+07	7.87321e+07	50.35	1.0433e+08	1.04529e+08	8.47	0.78	-0.36	0.645377	0.19	0.837808	1.12617	141.958	35.2	0.6
M142T356	1.29605e+06	948745	84.22	755547	762762	22.26	1.72	0.78	0.160528	0.79	0.408129	0.432622	142.061	356.2	5.9
M142T485	365788	393247	53.29	221301	134031	68.32	1.65	0.72	0.0498834	1.3	0.201689	1.01334	142.123	485	8.1
M142T625	365535	351585	36.61	485114	468440	16.27	0.75	-0.41	0.0498834	1.3	0.201689	1.27935	142.123	625	10.4
M142T63	6.38486e+07	6.21114e+07	42.71	5.05895e+07	2.75142e+07	106.72	1.26	0.34	0.234499	0.63	0.504207	0.867376	141.978	63.3	1.1
M142T709	192228	148635	87.31	212625	202377	57.2	0.9	-0.15	0.645377	0.19	0.837808	0.29633	142.159	709.3	11.8
M142T72_1	1.09951e+07	1.01646e+07	18.69	1.01371e+07	1.03351e+07	5.13	1.08	0.12	0.95913	0.02	0.985204	0.710636	142.035	71.8	1.2
M142T72_2	1.16105e+06	1.16308e+06	7.3	807831	804395	13.55	1.44	0.52	0.0001554	3.81	0.00610078	2.18392	142.052	71.5	1.2
M142T807	4.51968e+07	3.76597e+07	45.78	3.60129e+07	3.14414e+07	30.98	1.26	0.33	0.645377	0.19	0.837808	0.618007	141.983	806.7	13.4
M142T808	4.39358e+07	4.19397e+07	37.55	3.96363e+07	4.11261e+07	32.28	1.11	0.15	0.645377	0.19	0.837808	0.293703	141.957	808	13.5
M142T828	3.81793e+06	3.84402e+06	17.14	3.24591e+06	3.33876e+06	33.01	1.18	0.23	0.194872	0.71	0.457172	0.866713	142.21	828.3	13.8
M142T85	1.25931e+07	1.42642e+07	44.43	1.27866e+07	1.25963e+07	13.42	0.98	-0.02	0.505361	0.3	0.749981	0.407333	142.026	84.5	1.4
M143T109	616060	794842	63.74	644453	700092	29.75	0.96	-0.07	0.645377	0.19	0.837808	0.55736	143.082	109.2	1.8
M143T137	6.20589e+06	6.35914e+06	43.81	5.49547e+06	5.96954e+06	33.5	1.13	0.18	0.573737	0.24	0.794466	0.253315	142.982	136.9	2.3
M143T203	2.41982e+06	2.41212e+06	11.4	2.40414e+06	2.44715e+06	5.86	1.01	0.01	0.878477	0.06	0.952443	0.0600732	142.982	203	3.4
M143T519	305159	297557	27.29	284574	274539	27.62	1.07	0.1	0.95913	0.02	0.985204	0.322204	143.118	519.3	8.7
M143T542	3.17101e+06	2.65111e+06	37.55	1.70629e+06	1.83792e+06	21.53	1.86	0.89	0.0001554	3.81	0.00610078	1.78863	143.107	542.1	9
M143T652	432676	385772	35.11	444611	310114	83.63	0.97	-0.04	0.505361	0.3	0.749981	0.40425	143.07	652.2	10.9
M143T68	1.80484e+06	1.59316e+06	75.05	1735331	2.23452e+06	57.53	1.04	0.06	0.798446	0.1	0.918313	0.0434322	142.96	68.2	1.1
M143T72	3.03113e+06	1.51274e+06	84.36	2.51695e+06	2.40433e+06	47.18	1.2	0.27	0.720901	0.14	0.878065	0.0663045	143.048	71.8	1.2
M143T82	1.31458e+07	1.23129e+07	35.62	2.38117e+07	2.01264e+07	45.96	0.55	-0.86	0.014763	1.83	0.0952789	1.5265	142.948	82.1	1.4
M143T99	2.33558e+06	2.70415e+06	52.18	1.94871e+06	1.52228e+06	54.08	1.2	0.26	0.798446	0.1	0.918313	0.359024	143.081	99.4	1.7
M144T101	4.5898e+07	4.53936e+07	6.96	4.61027e+07	4.56145e+07	8.32	1	-0.01	0.95913	0.02	0.985204	0.0123289	144.102	100.6	1.7
M144T315_1	1.09267e+06	1.08347e+06	19.33	716675	651512	54.09	1.52	0.61	0.0498834	1.3	0.201689	1.3041	143.946	314.8	5.2
M144T315_2	1819894730	1.8236e+09	22.2	1.15024e+09	1.1187e+09	32.63	1.58	0.66	0.004662	2.33	0.0475536	1.57328	144.048	314.8	5.2
M144T315_3	1.29294e+07	1.21642e+07	28.64	7.85661e+06	7.24325e+06	45.76	1.65	0.72	0.0281274	1.55	0.141969	1.40057	144.15	314.7	5.2
M144T397	5.67535e+06	5.90891e+06	48.89	2.69417e+06	2.49977e+06	79.96	2.11	1.07	0.0379176	1.42	0.171246	1.27752	144.081	397.1	6.6
M144T428	3.02982e+06	1.63456e+06	105.03	1.08711e+07	7.61604e+06	90.96	0.28	-1.84	0.0206682	1.68	0.117429	1.43945	144.081	427.8	7.1
M144T464	347527	328514	72.88	10942	979.02	199.89	31.76	4.99	0.0029526	2.53	0.0361958	1.87446	144.175	464.3	7.7
M144T570	27360.1	1132.11	179.12	44881.7	38163.2	107.38	0.61	-0.71	0.573737	0.24	0.794466	0.569958	143.552	569.7	9.5
M144T597	268666	134715	83.34	356360	317021	69.59	0.75	-0.41	0.382284	0.42	0.64771	0.511119	144.175	597.3	10
M144T663	2.36363e+06	2.13961e+06	60.32	2.15367e+06	1.14315e+06	87	1.1	0.13	0.798446	0.1	0.918313	0.477758	144.138	663.2	11.1
M144T689	4.3247e+06	4.87564e+06	38.21	2.02293e+06	1.75797e+06	51.38	2.14	1.1	0.0104118	1.98	0.0771942	1.6077	144.138	688.5	11.5
M144T72_1	2.80251e+07	2.16115e+07	44.69	2.6377e+07	1.77969e+07	73.32	1.06	0.09	0.278632	0.55	0.551712	0.501154	143.997	72.2	1.2
M144T98	6.61953e+06	6.57183e+06	12.95	2.73551e+06	2.05033e+06	43.17	2.42	1.27	0.0001554	3.81	0.00610078	2.15994	144.065	98.1	1.6
M145T109	1.80601e+06	1.75655e+06	73.2	3.13199e+06	3.14394e+06	48.81	0.58	-0.79	0.194872	0.71	0.457172	0.974042	144.961	109.3	1.8
M145T121	1.57223e+07	1.57711e+07	13.78	1.36043e+07	1.40891e+07	33.91	1.16	0.21	0.234499	0.63	0.504207	0.942565	145.05	121.2	2
M145T315	2.96741e+09	2.31014e+09	77.14	5.76697e+09	3.75212e+09	105.45	0.51	-0.96	0.573737	0.24	0.794466	0.275572	145.051	314.7	5.2
M145T34	2.15343e+07	2.06847e+07	17.94	1.66469e+07	1.6798e+07	5.83	1.29	0.37	0.0029526	2.53	0.0361958	1.74868	145.049	33.6	0.6
M145T552	1.07262e+06	973470	40.7	855168	952426	31.41	1.25	0.33	0.505361	0.3	0.749981	0.59399	145.123	552	9.2
M145T64	1.24026e+07	1.03906e+07	59.84	1.31319e+07	5.8156e+06	113.08	0.94	-0.08	0.278632	0.55	0.551712	0.465685	145.049	64.2	1.1
M145T682	397775	427462	39.65	622722	440481	77.31	0.64	-0.65	0.720901	0.14	0.878065	0.624566	145.123	681.7	11.4
M145T688	227682	202400	43.1	146905	136585	55.88	1.55	0.63	0.104895	0.98	0.317905	1.15128	145.142	688.4	11.5
M145T76	1.01138e+06	1.01361e+06	35.01	1.02886e+06	980586	33.65	0.98	-0.02	0.95913	0.02	0.985204	0.0730299	145.097	75.8	1.3
M145T815	2.2716e+07	1.86866e+07	56.15	4.37365e+07	4.4752e+07	39.09	0.52	-0.95	0.014763	1.83	0.0952789	1.58343	144.982	815.3	13.6
M145T89	1.58425e+07	1.50387e+07	47.03	8.70828e+06	9.11789e+06	30.3	1.82	0.86	0.130381	0.88	0.362517	1.35487	145.05	89.1	1.5
M145T99	1.75841e+07	1.87575e+07	20.02	1.60591e+07	1.59207e+07	16.79	1.09	0.13	0.573737	0.24	0.794466	0.655374	145.049	99.5	1.7
M146T104	1.54399e+08	1.52869e+08	16.98	1.67559e+08	1.48161e+08	39.55	0.92	-0.12	0.95913	0.02	0.985204	0.191614	146.081	104.3	1.7
M146T114	1.68344e+06	1.70987e+06	37.96	2.14568e+06	2.1385e+06	14.02	0.78	-0.35	0.130381	0.88	0.362517	1.00228	146.045	113.8	1.9
M146T115	1.11595e+07	9.17851e+06	33.99	2.5252e+07	1.46053e+07	118.71	0.44	-1.18	0.0379176	1.42	0.171246	1.23387	146.118	115.2	1.9
M146T314	878559	881510	43.3	3.46136e+06	2.99368e+06	49.44	0.25	-1.98	0.004662	2.33	0.0475536	1.85913	146.055	314.2	5.2
M146T315	5.59044e+07	6.26924e+07	60.48	4.46561e+07	3.65381e+07	93.93	1.25	0.32	0.573737	0.24	0.794466	0.554968	146.044	314.7	5.2
M146T383	625323	434159	83.93	2.32665e+06	2.35892e+06	59.39	0.27	-1.9	0.0206682	1.68	0.117429	1.39539	146.118	382.5	6.4
M146T395	287057	260037	51.45	947484	863888	52.33	0.3	-1.72	0.0029526	2.53	0.0361958	1.91933	146.118	395	6.6
M146T397	1.31579e+07	1.44495e+07	55.24	9.31555e+06	9.49205e+06	63.31	1.41	0.5	0.328205	0.48	0.600385	0.564718	146.06	397.2	6.6
M146T408	1.68681e+06	1.29506e+06	89.08	1.70527e+06	1.92155e+06	59.62	0.99	-0.02	0.645377	0.19	0.837808	0.250374	146.06	407.9	6.8
M146T578	2.51514e+06	2.59697e+06	15.55	2.33086e+06	2.2888e+06	11.4	1.08	0.11	0.328205	0.48	0.600385	0.653846	146.06	578.5	9.6
M146T66	343008	354094	14.74	399770	381656	22.97	0.86	-0.22	0.278632	0.55	0.551712	0.900801	145.607	66.5	1.1
M146T68	4.13488e+06	3.88116e+06	52.61	4.647e+06	3.69667e+06	59.98	0.89	-0.17	1	0	1	0.208622	146.165	68	1.1
M146T72	1.53192e+07	1.52397e+07	6.07	1.70407e+07	1.72672e+07	8.05	0.9	-0.15	0.0281274	1.55	0.141969	1.49908	146.03	71.7	1.2
M146T97	2.15325e+08	2.53138e+08	46.28	9.72606e+07	66884224	60.38	2.21	1.15	0.014763	1.83	0.0952789	1.38985	146.118	96.8	1.6
M147T113	5.36997e+07	5.31914e+07	14.25	2.4027e+07	1.92068e+07	62.88	2.23	1.16	0.000621601	3.21	0.0140919	1.84427	147.077	113.2	1.9
M147T126	4.916e+06	2.97617e+06	99.84	3.9456e+06	2.68024e+06	59.83	1.25	0.32	1	0	1	0.132995	147.078	126.5	2.1
M147T139	1.0833e+07	1.11474e+07	17.07	3.30199e+06	2.70414e+06	88.75	3.28	1.71	0.000621601	3.21	0.0140919	1.85674	147.044	139.5	2.3
M147T191	6.76838e+06	6.65059e+06	14.87	4.23397e+06	4.45964e+06	21.26	1.6	0.68	0.0001554	3.81	0.00610078	2.00557	147.044	191	3.2
M147T222	3.57041e+06	3.45922e+06	13.45	3.59678e+06	3.28399e+06	39.08	0.99	-0.01	0.798446	0.1	0.918313	0.344717	147.046	221.7	3.7
M147T397	1.30785e+06	1.09331e+06	77.93	503303	344765	74.29	2.6	1.38	0.0829837	1.08	0.275972	1.16138	147.063	396.7	6.6
M147T454	171560	157152	38.69	195686	152647	74.4	0.88	-0.19	1	0	1	0.287036	146.507	454	7.6
M147T578	632682	610015	25.02	1.53299e+06	1.61233e+06	45.34	0.41	-1.28	0.004662	2.33	0.0475536	1.76439	147.063	578.2	9.6
M147T626	1.62377e+06	1.57584e+06	14.09	1.76884e+06	1.71325e+06	18.45	0.92	-0.12	0.382284	0.42	0.64771	0.64197	147.063	625.7	10.4
M147T640	1.07563e+06	967541	35.06	744902	718305	30	1.44	0.53	0.0829837	1.08	0.275972	1.366	147.08	640	10.7
M147T68	273024	293864	54.08	358209	360327	19.19	0.76	-0.39	0.382284	0.42	0.64771	1.01557	147.169	67.8	1.1
M147T72	1.6844e+06	516922	108.45	2.0006e+06	1.53786e+06	102.59	0.84	-0.25	0.505361	0.3	0.749981	0.536256	147.031	71.8	1.2
M147T76_1	266029	271874	11.13	248320	243442	13.55	1.07	0.1	0.328205	0.48	0.600385	0.692137	147.008	76	1.3
M147T76_2	6.50687e+08	6.32606e+08	25.83	5.28199e+08	4.99166e+08	13.78	1.23	0.3	0.160528	0.79	0.408129	1.07606	147.113	76.3	1.3
M147T771	750991	728267	44.82	983873	950719	37.53	0.76	-0.39	0.278632	0.55	0.551712	0.744388	147.08	770.7	12.8
M147T85	2.00677e+09	1.94584e+09	7.02	1.91966e+09	1.92234e+09	3.24	1.05	0.06	0.441803	0.35	0.702485	0.976054	147.077	85.3	1.4
M147T97	1.53075e+07	1.5379e+07	7.33	8.11982e+06	8.1992e+06	24.43	1.89	0.91	0.0001554	3.81	0.00610078	2.21866	147.121	96.9	1.6
M148T100	3.72881e+07	3.79742e+07	29.75	3.12152e+07	3.19215e+07	31.02	1.19	0.26	0.328205	0.48	0.600385	0.688604	148.06	99.7	1.7
M148T114	3.51122e+06	2.78952e+06	53.61	3.04308e+06	2.93944e+06	40.7	1.15	0.21	0.645377	0.19	0.837808	0.253427	148.043	113.8	1.9
M148T116	1.39952e+07	1.1941e+07	27.08	2.99977e+07	2.95325e+07	44.64	0.47	-1.1	0.0104118	1.98	0.0771942	1.44323	148.06	116.3	1.9
M148T121	5.29881e+06	5.32633e+06	9.92	5.25771e+06	5.15802e+06	11.18	1.01	0.01	0.95913	0.02	0.985204	0.147023	148.097	121.1	2
M148T125	409674	406016	16.3	281154	189756	58.78	1.46	0.54	0.234499	0.63	0.504207	1.4169	148.047	125.1	2.1
M148T338	1.90462e+06	1.93451e+06	6.67	1.78767e+06	1.78051e+06	9.94	1.07	0.09	0.194872	0.71	0.457172	0.890793	148.076	338.4	5.6
M148T72	2.76402e+06	2.73001e+06	5.03	1.92771e+06	1.85178e+06	15.23	1.43	0.52	0.0001554	3.81	0.00610078	2.16359	148.027	71.8	1.2
M148T76	2.46824e+07	2.48132e+07	20.79	3.12333e+07	2.21888e+07	50.58	0.79	-0.34	0.95913	0.02	0.985204	0.520356	148.116	76.3	1.3
M148T77	1.14074e+06	1.10575e+06	12.98	1.80598e+06	1.77869e+06	10.49	0.63	-0.66	0.0001554	3.81	0.00610078	2.26663	148.084	77.1	1.3
M148T84	1.3186e+08	1.33673e+08	31.67	1.7089e+08	1.71575e+08	18.36	0.77	-0.37	0.0649573	1.19	0.238167	1.16574	148.004	84.2	1.4
M148T85	1.10491e+08	9.38416e+07	104.09	3.65915e+06	3.85665e+06	23.84	30.2	4.92	0.0379176	1.42	0.171246	1.50613	148.08	85.3	1.4
M148T88	1.44875e+09	1.31556e+09	27.63	1.56016e+09	1.55446e+09	14.47	0.93	-0.11	0.328205	0.48	0.600385	0.559356	148.06	88.5	1.5
M148T99_1	1.9286e+06	2.12583e+06	57.34	730617	613518	41.01	2.64	1.4	0.0104118	1.98	0.0771942	1.56216	148.097	99.4	1.7
M148T99_2	3.4499e+06	3.46831e+06	26.3	2.87384e+06	2.64546e+06	26.02	1.2	0.26	0.194872	0.71	0.457172	0.726733	148.133	98.9	1.6
M149T335	1.80996e+06	1.64901e+06	70.7	1.59179e+06	1.4504e+06	76.69	1.14	0.19	0.878477	0.06	0.952443	0.389669	149.071	334.6	5.6
M149T338	2.31448e+07	2.08994e+07	56.7	3.56327e+07	3.722e+07	45.22	0.65	-0.62	0.130381	0.88	0.362517	0.929012	149.06	338.4	5.6
M149T356	1.07469e+06	490026	130.61	2.12604e+06	2.74274e+06	65.32	0.51	-0.98	0.234499	0.63	0.504207	1.14201	149.03	356.4	5.9
M149T565	2.06225e+06	1.61739e+06	72.08	1.93616e+06	1.6808e+06	78.3	1.07	0.09	0.798446	0.1	0.918313	0.223955	149.045	565.4	9.4
M149T65	2.86901e+06	2.93473e+06	62.97	4.09411e+06	4.20185e+06	25.74	0.7	-0.51	0.160528	0.79	0.408129	1.07771	148.977	64.5	1.1
M149T657	744665	841422	36.76	621214	403356	60.46	1.2	0.26	0.160528	0.79	0.408129	0.676954	149.06	657.1	11
M149T76	2.72721e+06	2.60102e+06	19.2	2.57247e+06	2.54212e+06	4.54	1.06	0.08	0.878477	0.06	0.952443	0.462124	149.117	76.1	1.3
M149T785	2.15809e+06	2.04977e+06	53.92	2.98199e+06	2059292	83.79	0.72	-0.47	0.95913	0.02	0.985204	0.170724	149.023	784.8	13.1
M149T823	5.28634e+06	4.04771e+06	56.87	4.29974e+06	4.60349e+06	40.94	1.23	0.3	0.798446	0.1	0.918313	0.395324	149.06	823.1	13.7
M149T85	6.65199e+06	7.79188e+06	64.18	5.55699e+06	5.08127e+06	98.63	1.2	0.26	0.878477	0.06	0.952443	0.292002	149.081	85.3	1.4
M149T88	5.87137e+07	6.12747e+07	30.83	6.86264e+07	6.6516e+07	11.03	0.86	-0.23	0.573737	0.24	0.794466	1.0067	149.064	88.5	1.5
M150T107	566001	490412	50.52	962160	915881	20.05	0.59	-0.77	0.014763	1.83	0.0952789	1.58954	149.664	107.3	1.8
M150T122	5.69067e+08	5.78186e+08	54.47	1.71953e+08	1.61012e+08	59.15	3.31	1.73	0.00699301	2.16	0.0602244	1.74977	150.058	121.7	2
M150T140	2.76802e+07	2.40921e+07	87.29	2.65959e+07	3.47615e+07	64.45	1.04	0.06	0.798446	0.1	0.918313	0.293243	150.058	139.9	2.3
M150T288	1.57552e+06	1.4247e+06	55.38	1.31085e+06	1.43679e+06	45.87	1.2	0.27	0.645377	0.19	0.837808	0.308131	150.055	288	4.8
M150T308	1.35497e+06	1.46729e+06	37.71	1.45994e+06	1.64124e+06	31.04	0.93	-0.11	0.645377	0.19	0.837808	0.271109	150.055	308.1	5.1
M150T338	4.54334e+06	3.90252e+06	59.18	1.99133e+06	1.73332e+06	54.87	2.28	1.19	0.0379176	1.42	0.171246	1.47794	150.063	338.4	5.6
M150T34	1.61838e+07	1.62836e+07	24.88	1.52329e+07	1.65428e+07	27.65	1.06	0.09	0.720901	0.14	0.878065	0.349065	149.966	34.2	0.6
M150T356	1.05905e+07	10895142	15.68	9.84084e+06	9.84736e+06	9.31	1.08	0.11	0.382284	0.42	0.64771	0.695276	150.049	356.4	5.9
M150T404	6.3441e+06	7.44927e+06	45.53	4.36523e+06	5.07917e+06	67.66	1.45	0.54	0.130381	0.88	0.362517	0.874005	149.967	403.6	6.7
M150T418	1.52768e+06	1.41978e+06	48.76	2.34729e+06	2.45234e+06	30.4	0.65	-0.62	0.0498834	1.3	0.201689	1.3086	150.057	417.8	7
M150T490	1.16573e+06	1.1146e+06	41.15	864395	957024	30.43	1.35	0.43	0.160528	0.79	0.408129	0.840407	150.128	490.2	8.2
M150T556	687814	729421	29.42	520592	486570	44.32	1.32	0.4	0.160528	0.79	0.408129	0.84991	150.091	556.2	9.3
M150T601	556108	617529	61.98	682423	683132	23.78	0.81	-0.3	0.573737	0.24	0.794466	0.838186	150.128	600.6	10
M150T686	594650	503166	39.78	243461	233255	59.19	2.44	1.29	0.004662	2.33	0.0475536	1.7514	150.092	686.4	11.4
M150T72_1	8.07882e+06	7.69016e+06	28.03	5.29673e+06	5.52922e+06	48.96	1.53	0.61	0.0829837	1.08	0.275972	1.34625	149.597	72.4	1.2
M150T73	9.4423e+06	6.3584e+06	79.95	5.97942e+06	4.67276e+06	75.23	1.58	0.66	0.382284	0.42	0.64771	0.768628	149.953	72.9	1.2
M150T738	247400	171955	75.66	338022	329944	74.72	0.73	-0.45	0.573737	0.24	0.794466	0.45198	150.091	738.5	12.3
M150T84_1	6.95043e+06	5.78258e+06	39.45	4.07612e+06	3.88105e+06	43.6	1.71	0.77	0.0281274	1.55	0.141969	1.46185	150	83.8	1.4
M150T84_2	6.27622e+06	6.25666e+06	6.78	5.38124e+06	6.19812e+06	37.08	1.17	0.22	0.95913	0.02	0.985204	0.885716	150.076	83.6	1.4
M150T88	8.72885e+06	8.54362e+06	23.84	1.07912e+07	1.01654e+07	18.23	0.81	-0.31	0.0829837	1.08	0.275972	1.16173	150.065	88.5	1.5
M151T122	4.42811e+07	4.3854e+07	46.86	6.63854e+07	6.52897e+07	10.83	0.67	-0.58	0.0379176	1.42	0.171246	1.45543	151.061	121.7	2
M151T140	1.10309e+07	1.07997e+07	48.75	3.36294e+06	3.66518e+06	18.47	3.28	1.71	0.0001554	3.81	0.00610078	2.06167	151.061	140	2.3
M151T266	5.28511e+06	5.44852e+06	35.67	5.72873e+06	5.20135e+06	41.67	0.92	-0.12	0.798446	0.1	0.918313	0.290317	151.097	266	4.4
M151T302	4.49413e+06	4.66794e+06	46.9	1.90673e+06	1.33602e+06	70.78	2.36	1.24	0.004662	2.33	0.0475536	1.47354	151.097	302.3	5
M151T330	5.38414e+06	4.24158e+06	57.51	4.67627e+06	4.77633e+06	47.1	1.15	0.2	0.95913	0.02	0.985204	0.377303	151.062	329.7	5.5
M151T353	1.1252e+06	1.09147e+06	17.1	898221	906243	20.48	1.25	0.33	0.0498834	1.3	0.201689	1.32027	151.097	352.6	5.9
M151T356	1.16178e+06	409521	123.95	1.45521e+06	866076	128.33	0.8	-0.32	0.382284	0.42	0.64771	0.794264	150.551	356.4	5.9
M151T394	1.00968e+06	1.04578e+06	40.08	663180	706101	44.65	1.52	0.61	0.0829837	1.08	0.275972	0.998234	151.097	393.7	6.6
M151T596	421618	428222	29.13	483556	452398	25.89	0.87	-0.2	0.505361	0.3	0.749981	0.627021	151.097	596.2	9.9
M151T672	2.75586e+06	2.66546e+06	23.13	2.69897e+06	2.47101e+06	44.48	1.02	0.03	0.720901	0.14	0.878065	0.352454	151.036	671.8	11.2
M151T72_1	2.07845e+06	2.63367e+06	55.77	2.37767e+06	2.16097e+06	36.93	0.87	-0.19	0.645377	0.19	0.837808	0.593072	150.501	71.6	1.2
M151T72_2	5.86844e+08	6.09404e+08	28.73	7.18404e+08	6.8844e+08	32.3	0.82	-0.29	0.382284	0.42	0.64771	0.82604	151.035	71.7	1.2
M152T112	1.05911e+06	767321	52.6	555252	529591	40.93	1.91	0.93	0.0379176	1.42	0.171246	1.428	152.082	112.1	1.9
M152T114	1.20398e+07	1.15181e+07	34.94	1.05953e+07	1.05048e+07	16.8	1.14	0.18	0.645377	0.19	0.837808	0.430162	152.038	113.9	1.9
M152T140	7.33415e+07	7.05669e+07	35.23	6.90865e+07	7.10453e+07	31.54	1.06	0.09	0.95913	0.02	0.985204	0.226895	152.057	139.7	2.3
M152T174	5.53452e+07	5.6729e+07	40.61	7.3698e+07	7.89357e+07	39.74	0.75	-0.41	0.234499	0.63	0.504207	0.80727	152.057	174.1	2.9
M152T279	4.97359e+07	4.56561e+07	20.81	4.18495e+07	4.11987e+07	31.29	1.19	0.25	0.234499	0.63	0.504207	0.948553	152.057	279.1	4.7
M152T302	506750	226812	103.98	991032	731910	91.17	0.51	-0.97	0.328205	0.48	0.600385	0.729132	152.1	302.3	5
M152T303	695828	642183	56.88	386035	314461	63.86	1.8	0.85	0.0649573	1.19	0.238167	1.19163	152.057	302.5	5
M152T329	974166	1.01506e+06	48.28	1.60571e+06	1554222	45.26	0.61	-0.72	0.0649573	1.19	0.238167	1.24308	152.057	329.1	5.5
M152T387	684812	680948	27.34	891663	894873	31.03	0.77	-0.38	0.130381	0.88	0.362517	1.10289	152.071	386.7	6.4
M152T398	6.25815e+06	5768755	56.83	3.32581e+06	3.38297e+06	30.32	1.88	0.91	0.0206682	1.68	0.117429	1.38505	152.107	397.6	6.6
M152T417	171894	77719.9	102.46	28881.6	16056.4	152.45	5.95	2.57	0.004662	2.33	0.0475536	1.56213	152.034	416.6	6.9
M152T462	358684	280523	60.66	345232	342964	42.62	1.04	0.06	0.645377	0.19	0.837808	0.081528	152.143	462	7.7
M152T485	2.29153e+06	1.26667e+06	90.29	2.79506e+06	2.22315e+06	73.63	0.82	-0.29	0.382284	0.42	0.64771	0.421726	152.107	485	8.1
M152T525	3.11349e+06	3.25958e+06	43.86	3.14097e+06	2.24915e+06	70.51	0.99	-0.01	0.645377	0.19	0.837808	0.129702	152.071	525.4	8.8
M152T620	1.01026e+07	1.03579e+07	47.06	2.65113e+06	1.4395e+06	95.32	3.81	1.93	0.0029526	2.53	0.0361958	1.83153	152.017	620.1	10.3
M152T70	643539	643957	37.05	545909	578878	63.54	1.18	0.24	0.798446	0.1	0.918313	0.539009	152.123	69.8	1.2
M152T72	9.75903e+07	9.06707e+07	35.59	8.43433e+07	8.0746e+07	37.66	1.16	0.21	0.505361	0.3	0.749981	0.495874	152.036	71.7	1.2
M152T73	6.65388e+06	6.82059e+06	8.41	5.7868e+06	6.60684e+06	31.19	1.15	0.2	0.278632	0.55	0.551712	0.832228	151.95	73.1	1.2
M152T78	854132	841889	19.12	750755	768185	24.08	1.14	0.19	0.441803	0.35	0.702485	0.776511	152.068	77.9	1.3
M153T109	2.08921e+06	2.17979e+06	38.34	2.13341e+06	2.10768e+06	39.97	0.98	-0.03	0.95913	0.02	0.985204	0.0614432	153.102	108.6	1.8
M153T122	4.38189e+08	4.11897e+08	49.67	1.25078e+08	1.13108e+08	38.87	3.5	1.81	0.000621601	3.21	0.0140919	1.99316	153.041	121.9	2
M153T160	5.39669e+08	4.80195e+08	19.7	4.02809e+08	4.63756e+08	37.31	1.34	0.42	0.194872	0.71	0.457172	1.16515	153.041	160.3	2.7
M153T197	1.32713e+07	1.31648e+07	7.32	1.35766e+07	1.36894e+07	7.44	0.98	-0.03	0.505361	0.3	0.749981	0.339009	153.066	196.8	3.3
M153T256	9.8532e+06	9.82027e+06	10.98	9.38903e+06	9.59973e+06	13.26	1.05	0.07	0.573737	0.24	0.794466	0.547087	153.066	256.1	4.3
M153T278	2.87488e+06	2.53266e+06	54.45	1.86664e+06	1.52512e+06	45.19	1.54	0.62	0.234499	0.63	0.504207	1.00085	153.06	278.2	4.6
M153T318	2.05748e+07	1.62329e+07	45.28	8.3987e+06	9.08501e+06	20.3	2.45	1.29	0.0001554	3.81	0.00610078	1.95515	153.041	318.1	5.3
M153T403	563560	560249	20.57	469984	451906	25.33	1.2	0.26	0.130381	0.88	0.362517	1.0508	153.102	403	6.7
M153T620	287596	294559	33.42	202719	199538	25.27	1.42	0.5	0.0649573	1.19	0.238167	1.22453	153.02	620.2	10.3
M153T629	5.36057e+06	5.21654e+06	42.12	3.89475e+06	3.54196e+06	36.91	1.38	0.46	0.130381	0.88	0.362517	0.866688	153.091	628.6	10.5
M153T72	9.87935e+07	1.00761e+08	35.77	1.12304e+08	1.22193e+08	47.71	0.88	-0.18	0.645377	0.19	0.837808	0.168022	153.033	71.7	1.2
M153T90	2.28567e+06	2.18821e+06	34.53	6.54425e+06	6.49474e+06	42.71	0.35	-1.52	0.0003108	3.51	0.00894927	2.0575	153.076	90.1	1.5
M154T111	1.45436e+06	1.28782e+06	56.24	523173	507676	18.19	2.78	1.48	0.0029526	2.53	0.0361958	1.81505	154.097	111.2	1.9
M154T114	1.39399e+07	1.1937e+07	38.05	1.54435e+07	1.33909e+07	49.83	0.9	-0.15	0.505361	0.3	0.749981	0.265876	154.003	114.3	1.9
M154T115	1.41391e+06	1.44076e+06	25.71	1.73792e+06	1.75195e+06	24.34	0.81	-0.3	0.0829837	1.08	0.275972	0.937197	154.086	114.9	1.9
M154T122_1	4.31466e+06	4.60902e+06	49.96	5.5575e+06	5.665e+06	15.1	0.78	-0.37	0.130381	0.88	0.362517	1.06203	154.025	122	2
M154T122_2	1.99069e+07	1.97512e+07	21.2	2.17159e+07	2.19018e+07	20.98	0.92	-0.13	0.573737	0.24	0.794466	0.526223	154.044	122	2
M154T160_2	1.78897e+07	1.61085e+07	71.4	3.13607e+07	2.96725e+07	53.92	0.57	-0.81	0.104895	0.98	0.317905	0.920357	154.044	160.2	2.7
M154T196	3.38011e+06	3.60418e+06	38.61	4.33655e+06	4.41215e+06	32.28	0.78	-0.36	0.234499	0.63	0.504207	0.846753	154.05	196.3	3.3
M154T280	1.01026e+06	30089.2	179.92	2.33538e+06	2.03298e+06	107.01	0.43	-1.21	0.441803	0.35	0.702485	0.563149	154.021	279.8	4.7
M154T341	2.29347e+06	1.99243e+06	46.72	2.55062e+06	2.6044e+06	50.13	0.9	-0.15	0.441803	0.35	0.702485	0.186342	154.061	340.8	5.7
M154T400	4.18584e+08	4.59175e+08	28.98	2.55348e+08	2.14358e+08	47.39	1.64	0.71	0.0206682	1.68	0.117429	1.40951	154.042	399.5	6.7
M154T582	3.93908e+06	1.96409e+06	89.46	1.57063e+06	1.26324e+06	52.11	2.51	1.33	0.234499	0.63	0.504207	0.989496	154.042	581.8	9.7
M154T72	4.91202e+06	4.93923e+06	4.85	4.5668e+06	4.60748e+06	6.66	1.08	0.11	0.0379176	1.42	0.171246	1.38505	154.036	71.8	1.2
M154T95	1.27431e+07	1.41614e+07	32.81	1.93886e+07	1.54393e+07	42.71	0.66	-0.61	0.0649573	1.19	0.238167	1.26616	154.059	94.5	1.6
M155T114	776320	902890	50.5	782342	776451	85.44	0.99	-0.01	0.720901	0.14	0.878065	0.270608	154.504	114.3	1.9
M155T160	1.10103e+06	1.14097e+06	46.1	1.47011e+06	1.53011e+06	26.65	0.75	-0.42	0.0829837	1.08	0.275972	0.874443	155.045	160.1	2.7
M155T432	6535586	6.12928e+06	27.99	6.96138e+06	5.35361e+06	73.46	0.94	-0.09	0.645377	0.19	0.837808	0.399429	155.155	432.3	7.2
M155T517	5.02642e+06	4.55394e+06	46.74	4.79911e+06	3.60008e+06	71.3	1.05	0.07	0.645377	0.19	0.837808	0.291375	155.107	516.5	8.6
M155T570	273789	200895	78.32	229632	152636	85.24	1.19	0.25	0.328205	0.48	0.600385	0.499677	155.06	569.8	9.5
M155T604	931427	896650	49.82	878739	864183	14.24	1.06	0.08	0.95913	0.02	0.985204	0.208447	155.047	603.6	10.1
M155T72	1.33991e+06	1.21712e+06	31.66	1.05109e+06	1.06028e+06	22.44	1.27	0.35	0.0829837	1.08	0.275972	1.11747	155.03	71.8	1.2
M155T77	1.87225e+06	1.94259e+06	11.48	554867	444680	75.1	3.37	1.75	0.0001554	3.81	0.00610078	2.0808	155.079	77.3	1.3
M155T798	2.86043e+08	2.7703e+08	30.4	3.11708e+08	2.55835e+08	51.07	0.92	-0.12	1	0	1	0.0246761	154.99	798	13.3
M155T84	7334518	7.06181e+06	11.5	6.79265e+06	6.43157e+06	19.36	1.08	0.11	0.194872	0.71	0.457172	0.700936	155.043	83.5	1.4
M155T90	3.80285e+06	3.48845e+06	33.95	3.15636e+06	3.0506e+06	16.99	1.2	0.27	0.278632	0.55	0.551712	0.817174	155.01	90.4	1.5
M155T98	2.86501e+06	2.85981e+06	27.73	2.53792e+06	2.58308e+06	11.4	1.13	0.17	0.234499	0.63	0.504207	0.466814	155.072	97.8	1.6
M156T114	9.97312e+06	7.19424e+06	76.19	7.54643e+06	6.30739e+06	71.49	1.32	0.4	0.720901	0.14	0.878065	0.444884	156.059	114.3	1.9
M156T181	3.06206e+06	3.55814e+06	38.73	3.12117e+06	3.01852e+06	44.71	0.98	-0.03	0.878477	0.06	0.952443	0.105386	156.138	181	3
M156T400	1.68431e+08	1.40881e+08	50.81	1.10374e+08	8.46185e+07	93.38	1.53	0.61	0.0281274	1.55	0.141969	1.04742	156.039	399.5	6.7
M156T407	1.12663e+06	916103	43.93	1.34762e+06	1.0415e+06	66.02	0.84	-0.26	1	0	1	0.050532	156.066	407.2	6.8
M156T427	2.40018e+06	2.05966e+06	39.77	371596	281489	71.56	6.46	2.69	0.0001554	3.81	0.00610078	2.25191	156.102	427.4	7.1
M156T502	756882	706339	29.27	804199	815732	22.47	0.94	-0.09	0.645377	0.19	0.837808	0.365035	156.08	502.1	8.4
M156T582	448300	257182	92.01	299732	326895	49.9	1.5	0.58	0.798446	0.1	0.918313	0.0843123	156.039	581.8	9.7
M156T606	1.4999e+06	1.3569e+06	53.22	1.17819e+06	1.21284e+06	49.7	1.27	0.35	0.505361	0.3	0.749981	0.602112	156.128	606	10.1
M156T72	1.14236e+07	1.00558e+07	37.47	1.0385e+07	8.5225e+06	54.66	1.1	0.14	0.505361	0.3	0.749981	0.484433	156.014	71.7	1.2
M156T76	340097	279008	85.75	348403	307803	84.2	0.98	-0.03	0.878477	0.06	0.952443	0.135113	156.15	76	1.3
M156T776	1.67778e+07	1.90669e+07	39.63	1.34889e+07	1.33996e+07	42.77	1.24	0.31	0.328205	0.48	0.600385	0.578333	156.12	776.3	12.9
M156T815	2.41442e+06	2.36996e+06	38.53	2.56472e+06	2.10281e+06	41.03	0.94	-0.09	0.720901	0.14	0.878065	0.261494	156.138	815.4	13.6
M156T83	9.17942e+07	7.58331e+07	71.1	1.56272e+08	1.69613e+08	35.33	0.59	-0.77	0.0498834	1.3	0.201689	1.23239	156.077	82.8	1.4
M157T102	2.82614e+06	2.73015e+06	45.93	3.11283e+06	2.94933e+06	40.08	0.91	-0.14	0.441803	0.35	0.702485	0.335287	156.961	102.1	1.7
M157T108	9.04674e+06	8.58207e+06	21.62	1.18017e+07	9.52131e+06	39.28	0.77	-0.38	0.104895	0.98	0.317905	1.01213	157.097	108.2	1.8
M157T114	203942	203776	55.58	278054	277932	9.72	0.73	-0.45	0.328205	0.48	0.600385	0.907498	157.011	114.1	1.9
M157T115	159069	138385	77.49	263412	238535	51.22	0.6	-0.73	0.194872	0.71	0.457172	1.15873	157.043	114.7	1.9
M157T357	420787	385882	31.88	517781	433119	66.67	0.81	-0.3	0.798446	0.1	0.918313	0.425692	157.038	356.6	5.9
M157T397	146970	158960	52.96	144726	115145	91.9	1.02	0.02	0.95913	0.02	0.985204	0.477758	157.076	397	6.6
M157T400	9.67668e+06	1.02852e+07	43.64	1.37914e+07	1.13908e+07	47.24	0.7	-0.51	0.328205	0.48	0.600385	0.992503	157.042	399.5	6.7
M157T564	2.63522e+06	2.97232e+06	37.17	1.77017e+06	1.22939e+06	48.7	1.49	0.57	0.104895	0.98	0.317905	1.03005	157.134	563.6	9.4
M157T606	195179	115827	77.9	233719	226746	28.94	0.84	-0.26	0.130381	0.88	0.362517	0.875946	156.63	606.1	10.1
M157T65	1.8584e+06	1.81536e+06	20.06	1.52994e+06	1.46153e+06	14.34	1.21	0.28	0.0649573	1.19	0.238167	1.2597	156.965	64.6	1.1
M157T707	322557	306378	41.34	378225	312554	40.55	0.85	-0.23	0.441803	0.35	0.702485	0.574423	157.05	707.2	11.8
M157T72	954460	963071	24.53	1.01727e+06	967598	19.65	0.94	-0.09	0.720901	0.14	0.878065	0.412245	157.015	71.7	1.2
M157T74	2.00075e+07	1.86202e+07	16.09	1.88002e+07	1.87636e+07	2.06	1.06	0.09	0.95913	0.02	0.985204	0.639891	157.17	74.4	1.2
M157T801	3.93859e+07	4.1142e+07	41.95	3.02279e+07	2.88478e+07	36.59	1.3	0.38	0.194872	0.71	0.457172	0.718962	156.991	801.4	13.4
M157T90	4.52838e+06	3.12349e+06	89.22	430066	244931	131.25	10.53	3.4	0.000621601	3.21	0.0140919	2.00872	156.99	90.1	1.5
M157T99	4.15653e+06	3.71705e+06	66.42	6.744e+06	5.81999e+06	22.75	0.62	-0.7	0.0104118	1.98	0.0771942	1.44663	157.097	98.6	1.6
M158T108	1.78815e+06	1.57857e+06	92.09	263623	286367	27.52	6.78	2.76	0.0206682	1.68	0.117429	1.42457	158.1	108.3	1.8
M158T112	1.61402e+06	1.58594e+06	10.77	1.54859e+06	1.59565e+06	7.71	1.04	0.06	0.645377	0.19	0.837808	0.568033	158.045	112	1.9
M158T115_1	6.18799e+06	5.94635e+06	57.13	2.33879e+06	1.59399e+06	55.95	2.65	1.4	0.0379176	1.42	0.171246	1.53493	158.081	115.1	1.9
M158T115_2	2.00539e+06	1.86449e+06	49.57	1.28164e+06	1.3064e+06	18.65	1.56	0.65	0.0498834	1.3	0.201689	1.173	158.118	115.1	1.9
M158T116	300851	281987	41.77	319095	324423	39.68	0.94	-0.08	0.505361	0.3	0.749981	0.193378	158.027	116.4	1.9
M158T135	4.90933e+06	3.89496e+06	67.68	4.35682e+06	4.18584e+06	48.9	1.13	0.17	0.95913	0.02	0.985204	0.0641532	158.081	135.4	2.3
M158T356	1.47774e+07	1.55637e+07	63.12	1.23186e+07	8.96705e+06	75.64	1.2	0.26	0.798446	0.1	0.918313	0.380158	158.036	356.4	5.9
M158T375	215099	217136	14.95	172838	179118	10.23	1.24	0.32	0.004662	2.33	0.0475536	1.60973	158.064	374.9	6.2
M158T403	2.64815e+06	2.75612e+06	26.86	2.95331e+06	2.64375e+06	34.85	0.9	-0.16	1	0	1	0.416794	158.001	403.3	6.7
M158T511	2.46489e+06	1.7536e+06	68.85	4.37156e+06	2.19444e+06	113.03	0.56	-0.83	0.234499	0.63	0.504207	0.761064	158.117	511.5	8.5
M158T576	6.55369e+06	4.74379e+06	113.89	6.48782e+06	4.91183e+06	79.16	1.01	0.01	0.645377	0.19	0.837808	0.271645	158.001	576	9.6
M158T59	1.76223e+07	1.79352e+07	25.27	1.53117e+07	1.38203e+07	20.07	1.15	0.2	0.441803	0.35	0.702485	0.670126	158.002	58.9	1
M158T634	1.62473e+07	1.5166e+07	31.07	1.17994e+07	1.06928e+07	22.99	1.38	0.46	0.0281274	1.55	0.141969	1.339	158.001	634	10.6
M158T685	457218	335137	79.12	552343	577565	45.64	0.83	-0.27	0.441803	0.35	0.702485	0.666355	158.19	685.2	11.4
M158T707	260838	258835	22.55	267968	261223	24.79	0.97	-0.04	0.95913	0.02	0.985204	0.160289	158.036	706.5	11.8
M158T74_1	9.02176e+06	9.63539e+06	23.51	8.61897e+06	9.35972e+06	33.11	1.05	0.07	0.878477	0.06	0.952443	0.313328	158.002	74.2	1.2
M158T74_2	1.06598e+06	1.10312e+06	30.14	1.50901e+06	1.53621e+06	20.27	0.71	-0.5	0.0379176	1.42	0.171246	1.53078	158.173	74.5	1.2
M158T742	8.25907e+06	9.67479e+06	40.2	8.05874e+06	8.2035e+06	29.09	1.02	0.04	0.573737	0.24	0.794466	0.013723	158.154	742	12.4
M158T760	1.65613e+08	1.3467e+08	52.39	1.12307e+08	1.0948e+08	30.25	1.47	0.56	0.234499	0.63	0.504207	1.00359	158.154	759.9	12.7
M158T83	1.57459e+06	1774803	45.74	5.6199e+06	5.53033e+06	22.47	0.28	-1.84	0.0001554	3.81	0.00610078	2.09526	158.093	83.3	1.4
M158T832	4.54509e+07	47333892	19.82	4.08188e+07	4.09858e+07	15.33	1.11	0.16	0.234499	0.63	0.504207	0.612715	158.154	832.2	13.9
M159T112	345456	273556	70.33	521632	496665	25.63	0.66	-0.59	0.0829837	1.08	0.275972	1.26415	159.011	112.5	1.9
M159T36	5.06494e+07	3.44449e+07	75	7.25571e+07	8.52421e+07	47.19	0.7	-0.52	0.234499	0.63	0.504207	0.826813	158.96	35.7	0.6
M159T397	2.0859e+07	2.20158e+07	31.81	1.04433e+07	1.03996e+07	51.02	2	1	0.00699301	2.16	0.0602244	1.57133	159.091	397.2	6.6
M159T403	1.88148e+07	1.84116e+07	70.1	3.721e+06	1.08892e+06	147.15	5.06	2.34	0.014763	1.83	0.0952789	1.61013	158.96	403.4	6.7
M159T596	746808	782709	27.32	743186	735388	31.16	1	0.01	0.798446	0.1	0.918313	0.0542803	159.116	595.5	9.9
M159T672	399116	438960	24.63	416431	392309	40.51	0.96	-0.06	0.878477	0.06	0.952443	0.0177216	159.081	672.4	11.2
M159T727	576510	488112	37.21	512951	461048	51.76	1.12	0.17	0.645377	0.19	0.837808	0.575397	159.117	727	12.1
M159T760	1.84941e+07	1.71206e+07	63.77	1.61929e+07	1.786e+07	35.27	1.14	0.19	0.878477	0.06	0.952443	0.13625	159.157	760	12.7
M159T80	1.23802e+08	1.24739e+08	33.42	121179862	1.23546e+08	31.63	1.02	0.03	0.95913	0.02	0.985204	0.133971	158.964	79.5	1.3
M159T91	1.17048e+06	1.14077e+06	25.35	412569	482966	47.39	2.84	1.5	0.0001554	3.81	0.00610078	1.96406	159.017	91	1.5
M159T99	1.00182e+06	1.29181e+06	48.31	971083	885929	57.15	1.03	0.04	0.645377	0.19	0.837808	0.0568479	159.1	98.7	1.6
M160T100	774749	840320	29.38	768355	799643	11.71	1.01	0.01	0.382284	0.42	0.64771	0.188721	160.06	99.8	1.7
M160T103	1.95322e+07	1.86492e+07	12.66	1.68016e+07	1.71441e+07	14.68	1.16	0.22	0.0829837	1.08	0.275972	1.22225	160.097	103	1.7
M160T112	5.29564e+06	5.82068e+06	35.69	7.76467e+06	7.12466e+06	50.86	0.68	-0.55	0.278632	0.55	0.551712	0.612106	160.097	111.7	1.9
M160T119	1.34636e+09	1.5781e+09	62.04	3.57855e+08	2.09909e+08	87.23	3.76	1.91	0.0379176	1.42	0.171246	1.43875	160.133	118.8	2
M160T136	6.70403e+06	6.6745e+06	15.89	7.13185e+06	7.29942e+06	20.87	0.94	-0.09	0.505361	0.3	0.749981	0.357971	159.968	136	2.3
M160T32	4.00096e+07	3.79977e+07	38.28	4.1206e+07	3.88483e+07	38.28	0.97	-0.04	0.95913	0.02	0.985204	0.0826738	159.97	31.9	0.5
M160T397_1	1.09312e+06	1.23509e+06	69.75	1.08663e+06	968730	63.58	1.01	0.01	0.95913	0.02	0.985204	0.0495476	160.076	397.2	6.6
M160T397_2	2.59903e+06	1.72008e+06	73.07	337545	275581	86.37	7.7	2.94	0.0003108	3.51	0.00894927	1.99965	160.095	397	6.6
M160T486	1.32425e+06	1.38056e+06	29.17	1.23615e+06	1.20673e+06	22.06	1.07	0.1	0.328205	0.48	0.600385	0.14217	160.097	485.7	8.1
M160T69	1.98068e+07	1.99182e+07	8.64	2.83131e+07	2.78042e+07	13.35	0.7	-0.52	0.0003108	3.51	0.00894927	2.14925	159.97	68.8	1.1
M160T87	3.84035e+06	3.90522e+06	7.09	2.28151e+06	2.26103e+06	31.43	1.68	0.75	0.0001554	3.81	0.00610078	1.94052	160.097	87.4	1.5
M161T111	487371	370712	66.61	265980	274666	34.29	1.83	0.87	0.0829837	1.08	0.275972	1.23294	161.1	111.3	1.9
M161T119	1.2322e+08	1.30612e+08	33.44	1.41809e+08	1.37694e+08	15.7	0.87	-0.2	0.441803	0.35	0.702485	0.832966	161.137	118.8	2
M161T127	1.00075e+07	9.79042e+06	26.17	3.05531e+06	2.95972e+06	49.33	3.28	1.71	0.0001554	3.81	0.00610078	2.08465	161.003	127.4	2.1
M161T34	1.54602e+07	1.53068e+07	10.05	1.71209e+07	1.67432e+07	7.87	0.9	-0.15	0.0281274	1.55	0.141969	1.35574	161.002	33.6	0.6
M161T352	8.16113e+06	8.22657e+06	45.79	9.34239e+06	1.1478e+07	47.36	0.87	-0.2	0.505361	0.3	0.749981	0.213699	161.004	351.7	5.9
M161T356	888539	142032	210.68	1.73873e+06	1.70928e+06	90.17	0.51	-0.97	0.194872	0.71	0.457172	0.876112	160.538	356.4	5.9
M161T384	1.49642e+08	6.49541e+06	263.95	9.72988e+06	1.03785e+07	37.95	15.38	3.94	0.441803	0.35	0.702485	0.403375	161.002	383.5	6.4
M161T404	6.7334e+06	7.00975e+06	38.02	5.18451e+06	4.55127e+06	45.25	1.3	0.38	0.234499	0.63	0.504207	0.789282	161.002	404.1	6.7
M161T428	1.68033e+06	1.20693e+06	70.37	3.7174e+06	3.07204e+06	63.71	0.45	-1.15	0.0206682	1.68	0.117429	1.42736	161.107	427.8	7.1
M161T433	153602	159567	14.24	209177	204638	26.23	0.73	-0.45	0.0379176	1.42	0.171246	1.46011	161.071	432.6	7.2
M161T463	281658	272920	25.21	201505	182239	35.7	1.4	0.48	0.0281274	1.55	0.141969	1.31599	161.136	463.4	7.7
M161T63	1.25728e+07	1.08457e+07	50.36	1.82682e+07	1.44471e+07	52.57	0.69	-0.54	0.234499	0.63	0.504207	0.892488	161.002	63	1
M161T665	1.06119e+06	1.01615e+06	34.11	806295	804579	42.84	1.32	0.4	0.160528	0.79	0.408129	0.938289	161.096	664.8	11.1
M161T72	3.577e+06	3.04488e+06	70.8	3.37218e+06	3.15015e+06	61.21	1.06	0.09	0.95913	0.02	0.985204	0.0600121	161.03	71.8	1.2
M161T742	2.97833e+06	2.18776e+06	57.25	2.2588e+06	1.92121e+06	49.7	1.32	0.4	0.194872	0.71	0.457172	0.710262	161.096	742.2	12.4
M161T768	3.88491e+06	4.20122e+06	38.43	6.99683e+06	7.12577e+06	37.11	0.56	-0.85	0.014763	1.83	0.0952789	1.43605	161.096	767.6	12.8
M161T77	1.03521e+07	1.05793e+07	28.61	6.30279e+06	6.56881e+06	40.26	1.64	0.72	0.0104118	1.98	0.0771942	1.41891	161.128	77.1	1.3
M161T82	1.38197e+06	1.36565e+06	18.38	1.822e+06	1.81359e+06	17.09	0.76	-0.4	0.014763	1.83	0.0952789	1.62402	160.92	82.1	1.4
M161T83	3.04754e+06	2.90727e+06	12.87	3.45123e+06	3.47842e+06	15.95	0.88	-0.18	0.104895	0.98	0.317905	0.985109	161.128	82.7	1.4
M161T98	7.52263e+06	7.42044e+06	32.53	2.76904e+06	2.41528e+06	82.26	2.72	1.44	0.0018648	2.73	0.0275628	1.68278	161.092	97.7	1.6
M162T114	6.90081e+07	6.8433e+07	26.14	4.45646e+07	4.5574e+07	32.66	1.55	0.63	0.0104118	1.98	0.0771942	1.42404	162.113	114.3	1.9
M162T119	1.20897e+06	141024	174.6	3.768e+06	3.4469e+06	104.61	0.32	-1.64	0.130381	0.88	0.362517	0.773732	162.137	118.7	2
M162T120	1.89071e+07	1.79135e+07	35.47	2.32279e+07	1.94655e+07	68.1	0.81	-0.3	0.878477	0.06	0.952443	0.104994	162.076	119.6	2
M162T129	2.19483e+07	2.164e+07	15.4	1.86004e+07	1.89402e+07	9.93	1.18	0.24	0.0281274	1.55	0.141969	1.39043	162.113	129	2.1
M162T290	1.43282e+06	1.2496e+06	57.78	1.59882e+06	1.40902e+06	59.32	0.9	-0.16	0.505361	0.3	0.749981	0.201243	162.076	289.6	4.8
M162T34	1.47667e+07	1.38786e+07	24.27	2.15716e+07	2.19939e+07	20.58	0.68	-0.55	0.014763	1.83	0.0952789	1.65852	162.001	34.3	0.6
M162T364	2.12849e+06	1.94494e+06	67.22	5.28366e+06	4.90226e+06	44.64	0.4	-1.31	0.014763	1.83	0.0952789	1.54664	162.004	364.1	6.1
M162T367	1.03026e+06	1.01694e+06	84.03	1.47629e+06	1.52476e+06	27.45	0.7	-0.52	0.382284	0.42	0.64771	1.09082	162.066	366.6	6.1
M162T597	406199	324839	48.42	509647	411728	50.98	0.8	-0.33	0.505361	0.3	0.749981	0.556508	162.091	597	9.9
M162T64	1.19438e+07	9.59118e+06	51.02	1.23517e+07	6.79584e+06	83.64	0.97	-0.05	0.278632	0.55	0.551712	0.227017	162.001	64	1.1
M162T654	502857	478440	45.53	590086	528862	45	0.85	-0.23	0.441803	0.35	0.702485	0.431377	162.091	653.9	10.9
M162T73	122432	124807	7.8	159244	144966	22	0.77	-0.38	0.0029526	2.53	0.0361958	1.54832	162.453	73.3	1.2
M162T90_1	1.18702e+06	1.15945e+06	88.14	1.94547e+06	1.8424e+06	67.34	0.61	-0.71	0.278632	0.55	0.551712	0.827956	161.991	89.5	1.5
M162T90_2	2.69942e+09	2.65503e+09	23.27	3.07422e+09	3.29674e+09	31.05	0.88	-0.19	0.130381	0.88	0.362517	0.271115	162.113	89.5	1.5
M163T114	9.41428e+06	9.46695e+06	6.95	9.1082e+06	9.13592e+06	4.14	1.03	0.05	0.194872	0.71	0.457172	0.70583	163.115	114.1	1.9
M163T127	8.45634e+07	8.26062e+07	43.85	3.50489e+07	3.86372e+07	45.57	2.41	1.27	0.00699301	2.16	0.0602244	1.70589	162.998	126.8	2.1
M163T161	9.65686e+07	9.03432e+07	62.83	1.18798e+08	1.19223e+08	50.54	0.81	-0.3	0.382284	0.42	0.64771	0.490916	162.996	161.1	2.7
M163T195	7.46818e+07	6.48969e+07	64.14	4.86819e+07	2.74951e+07	75.63	1.53	0.62	0.130381	0.88	0.362517	0.771481	162.996	194.8	3.2
M163T212	5.35861e+07	4.91342e+07	99.99	5.23539e+06	2.4422e+06	127.27	10.24	3.36	0.0379176	1.42	0.171246	1.29557	162.996	211.8	3.5
M163T230	1.05315e+08	1.15444e+08	34.43	5.74578e+07	5.29221e+07	30.84	1.83	0.87	0.0206682	1.68	0.117429	1.48793	162.996	229.8	3.8
M163T250	2.85804e+07	2.62616e+07	40.05	4.0787e+07	3.90398e+07	20.64	0.7	-0.51	0.0649573	1.19	0.238167	1.39201	162.998	250.4	4.2
M163T265	6.71642e+07	4.8968e+07	51.57	5.58247e+07	5.80283e+07	50.52	1.2	0.27	0.95913	0.02	0.985204	0.6055	162.996	264.7	4.4
M163T280	3.20875e+06	3.26247e+06	25.38	2.00531e+06	1.80727e+06	56.06	1.6	0.68	0.014763	1.83	0.0952789	1.38561	163.026	279.7	4.7
M163T300	9.54798e+07	9.00416e+07	45.18	4.41111e+07	4.42628e+07	18.57	2.16	1.11	0.000621601	3.21	0.0140919	1.86193	163.001	299.9	5
M163T325	1.14255e+08	9.34024e+07	61.35	8.32029e+07	7.37525e+07	69.53	1.37	0.46	0.441803	0.35	0.702485	0.773126	162.996	325.1	5.4
M163T33	1.54243e+08	1.58534e+08	23.82	1.44988e+08	1.41258e+08	14.34	1.06	0.09	0.645377	0.19	0.837808	0.308981	163	32.8	0.5
M163T348	6.15566e+07	5.80907e+07	25.71	4.80999e+07	4.79439e+07	30.48	1.28	0.36	0.104895	0.98	0.317905	1.13019	163.001	347.9	5.8
M163T404	5.68416e+07	6.49848e+07	48.98	6.41854e+07	6.10231e+07	51.29	0.89	-0.18	0.645377	0.19	0.837808	0.287066	162.996	404.3	6.7
M163T448	300462	281662	18.84	223843	224969	17.07	1.34	0.42	0.004662	2.33	0.0475536	1.68287	163.09	447.9	7.5
M163T449	4.64811e+07	2.73734e+07	95.24	4.02469e+07	3.39718e+07	50.65	1.15	0.21	0.645377	0.19	0.837808	0.15227	162.996	448.9	7.5
M163T472	1.61628e+07	1.94389e+07	65.64	1.48798e+07	1.37381e+07	18.8	1.09	0.12	0.573737	0.24	0.794466	0.400136	163	471.9	7.9
M163T503	5.40858e+07	6.69292e+07	40.59	3.12701e+07	3.53914e+07	54.97	1.73	0.79	0.0649573	1.19	0.238167	1.11843	163.001	503.1	8.4
M163T517	9.46588e+06	9.73581e+06	41.87	1.2385e+07	1.15648e+07	29.09	0.76	-0.39	0.234499	0.63	0.504207	1.00948	162.996	517.1	8.6
M163T539	2.40937e+07	2.35084e+07	18.54	2.60911e+07	2.41061e+07	21.11	0.92	-0.11	0.505361	0.3	0.749981	0.462168	162.996	538.8	9
M163T573_1	3.28577e+06	2.99943e+06	47.66	1.53841e+06	1.25925e+06	65.16	2.14	1.09	0.014763	1.83	0.0952789	1.42674	163.146	573.2	9.6
M163T573_2	1.21248e+06	949464	69.58	1.03805e+06	1.07736e+06	48.44	1.17	0.22	0.798446	0.1	0.918313	0.140974	163.48	573.2	9.6
M163T575	1.50845e+07	8.69221e+06	115.63	1.30957e+07	1.0623e+07	90.58	1.15	0.2	0.878477	0.06	0.952443	0.268676	163.133	574.6	9.6
M163T576	40178880	3.68248e+07	42.21	2.67735e+07	2.28996e+07	41.96	1.5	0.59	0.0829837	1.08	0.275972	1.25549	163	575.5	9.6
M163T597	1.75793e+07	1.60506e+07	24.97	1.69579e+07	1.86567e+07	20.33	1.04	0.05	1	0	1	0.115052	162.996	596.6	9.9
M163T608	1.36902e+07	1.23993e+07	32.02	1.20112e+07	1.16847e+07	20.83	1.14	0.19	0.505361	0.3	0.749981	0.53621	162.996	608	10.1
M163T612	965309	1.05265e+06	40.52	1.11509e+06	1.18964e+06	20.37	0.87	-0.21	0.573737	0.24	0.794466	0.717114	163.112	611.6	10.2
M163T634	2.89564e+07	2.80812e+07	44.52	2.54445e+07	1.88612e+07	68.77	1.14	0.19	0.573737	0.24	0.794466	0.454297	162.996	634.2	10.6
M163T65	3.47582e+06	3.57233e+06	10.02	3.52297e+06	3.38347e+06	16.21	0.99	-0.02	0.95913	0.02	0.985204	0.0898248	163.133	64.7	1.1
M163T655	892013	728411	63.13	413775	199833	100.94	2.16	1.11	0.0829837	1.08	0.275972	1.40059	163.148	655.4	10.9
M163T680	6.92686e+06	6.94017e+06	36.36	6.47713e+06	6.30179e+06	27.89	1.07	0.1	0.798446	0.1	0.918313	0.204819	162.995	680.3	11.3
M163T690	861465	806746	56.02	527562	424468	80.46	1.63	0.71	0.234499	0.63	0.504207	0.980974	163.148	689.9	11.5
M163T707	3.31963e+07	3.34886e+07	47.83	3.38601e+07	3.61337e+07	34.52	0.98	-0.03	0.441803	0.35	0.702485	0.0945783	163.039	706.7	11.8
M163T721	1.23111e+06	1.2514e+06	55.91	868129	410865	118.1	1.42	0.5	0.160528	0.79	0.408129	0.811395	163.075	721.3	12
M163T742	2.0418e+08	1.95752e+08	35.04	1.8418e+08	1.61067e+08	43.44	1.11	0.15	0.573737	0.24	0.794466	0.318828	163.112	741.6	12.4
M163T76_1	4.61083e+06	4.64957e+06	19.87	6.11722e+06	6.04851e+06	21.77	0.75	-0.41	0.0498834	1.3	0.201689	1.39572	163.084	75.9	1.3
M163T76_2	6.02615e+06	6.2133e+06	11.33	5.27151e+06	4.90526e+06	15.94	1.14	0.19	0.194872	0.71	0.457172	1.24018	163.108	75.7	1.3
M163T770	1.61143e+06	2.07232e+06	57.24	633489	443291	76.67	2.54	1.35	0.130381	0.88	0.362517	1.23335	163.148	770.4	12.8
M163T90	3.07927e+08	2.82251e+08	20.37	2.2289e+08	2.35793e+08	40.61	1.38	0.47	0.0649573	1.19	0.238167	1.29182	163.116	89.5	1.5
M164T107	401349	422773	23.22	431270	415472	23.84	0.93	-0.1	0.798446	0.1	0.918313	0.417407	164.038	107.3	1.8
M164T189	3.14165e+06	2.56734e+06	50.18	2.75111e+06	2.51515e+06	54.64	1.14	0.19	0.645377	0.19	0.837808	0.498945	164.073	188.7	3.1
M164T222	3.9047e+06	3.91201e+06	15.22	3.62741e+06	3.54497e+06	18.06	1.08	0.11	0.328205	0.48	0.600385	0.570115	164.073	221.9	3.7
M164T268	762569	907454	48.95	676053	673561	86.65	1.13	0.17	0.878477	0.06	0.952443	0.41543	164.074	268.1	4.5
M164T35	1.13247e+07	1.10538e+07	9.05	9.61836e+06	1.01783e+07	20.93	1.18	0.24	0.0206682	1.68	0.117429	1.26224	163.997	35.1	0.6
M164T371	212353	211432	4.39	215742	216564	8.83	0.98	-0.02	0.573737	0.24	0.794466	0.311791	164.057	371.3	6.2
M164T394	73329.3	77299.3	36.46	83055	65123.4	86.07	0.88	-0.18	0.878477	0.06	0.952443	0.352596	164.107	393.6	6.6
M164T404	1.60545e+06	1.75637e+06	22.67	2.00988e+06	2.09913e+06	21.1	0.8	-0.32	0.0829837	1.08	0.275972	1.19541	163.999	404.3	6.7
M164T575	1.53633e+06	1.42593e+06	47.49	807411	989182	59.09	1.9	0.93	0.0829837	1.08	0.275972	1.3532	164.136	574.7	9.6
M164T581	471150	329796	69.9	368569	249844	70.54	1.28	0.35	0.573737	0.24	0.794466	0.424143	164.107	580.7	9.7
M164T685	309157	299114	31.15	230436	205095	27.82	1.34	0.42	0.104895	0.98	0.317905	1.13286	164.107	684.6	11.4
M164T707	4.30575e+06	4.19163e+06	47.74	4.21699e+06	3.48408e+06	36.66	1.02	0.03	0.95913	0.02	0.985204	0.219049	164.042	706.7	11.8
M164T742	2.28426e+07	2.05442e+07	50.8	2.28365e+07	2.40116e+07	51.97	1	0	0.95913	0.02	0.985204	0.0634226	164.115	741.6	12.4
M164T83	4.79796e+06	4.6296e+06	10.25	4.93193e+06	4.91541e+06	7.25	0.97	-0.04	0.382284	0.42	0.64771	0.440802	164.008	83.1	1.4
M164T84	5.71689e+07	6.19136e+07	57.11	7.94248e+07	8.29384e+07	68.42	0.72	-0.47	0.441803	0.35	0.702485	0.276392	163.978	84.2	1.4
M164T90	4.52365e+07	5.3054e+07	54.43	3.2065e+07	3.1783e+07	66.95	1.41	0.5	0.160528	0.79	0.408129	0.785496	164.117	89.5	1.5
M165T101	982487	937552	9.59	877931	888662	5.46	1.12	0.16	0.0206682	1.68	0.117429	1.5441	165.076	100.6	1.7
M165T107	952719	881375	32.53	858924	808793	27.85	1.11	0.15	0.505361	0.3	0.749981	0.433927	165.113	106.8	1.8
M165T124	3.49242e+08	4.06293e+08	52.27	3.47132e+08	3.29742e+08	55.58	1.01	0.01	0.878477	0.06	0.952443	0.106807	165.054	124.3	2.1
M165T140	1.33454e+08	1.27449e+08	44.41	1.14819e+08	1.08779e+08	31.16	1.16	0.22	0.505361	0.3	0.749981	0.412935	165.054	139.6	2.3
M165T319	1.63426e+06	794450	103.88	501853	515994	30.13	3.26	1.7	0.0649573	1.19	0.238167	1.01396	165.066	319.1	5.3
M165T332	2.14503e+06	1.86348e+06	40.09	3.6026e+06	3.8269e+06	41.1	0.6	-0.75	0.0649573	1.19	0.238167	1.21167	165.113	332.1	5.5
M165T344	2.8881e+06	2.78852e+06	26.53	2.59184e+06	2.7946e+06	59	1.11	0.16	0.798446	0.1	0.918313	0.7007	165.113	343.8	5.7
M165T360	1.58451e+06	1.40354e+06	27.24	1.29833e+06	1.40001e+06	33.56	1.22	0.29	0.645377	0.19	0.837808	0.714537	165.113	359.6	6
M165T400	1.26001e+06	1.19883e+06	34.13	1.13005e+06	1.21909e+06	18.18	1.12	0.16	0.720901	0.14	0.878065	0.325019	165.01	399.5	6.7
M165T555	536368	558793	26.79	698558	687109	34.91	0.77	-0.38	0.104895	0.98	0.317905	0.785999	165.102	555.2	9.3
M165T64	9.42415e+06	1.12675e+07	43.73	7.29669e+06	6.60137e+06	51.74	1.29	0.37	0.382284	0.42	0.64771	0.57891	164.994	64	1.1
M165T701	686977	677604	26.69	766942	810751	34.41	0.9	-0.16	0.194872	0.71	0.457172	0.15468	165.127	701.2	11.7
M165T741	1.11586e+06	927306	50	762669	751106	49.47	1.46	0.55	0.160528	0.79	0.408129	1.02551	165.118	741.5	12.4
M165T746	874132	753735	50.96	1.00856e+06	1.22381e+06	38.28	0.87	-0.21	0.798446	0.1	0.918313	0.473332	165.091	745.6	12.4
M165T801	998910	897176	54.69	855673	747330	47.53	1.17	0.22	0.95913	0.02	0.985204	0.292069	165.076	801.5	13.4
M165T82	2.60039e+07	2.7089e+07	19.71	2.22054e+07	2.14144e+07	33.95	1.17	0.23	0.194872	0.71	0.457172	0.831936	164.93	81.8	1.4
M165T98	1.35848e+06	1.21105e+06	73.85	1.53913e+06	1.00447e+06	82.53	0.88	-0.18	0.95913	0.02	0.985204	0.165674	165.113	97.7	1.6
M165T99	702285	659527	50.26	398906	508673	68.21	1.76	0.82	0.0829837	1.08	0.275972	1.16425	165.1	98.5	1.6
M166T122	2.06707e+07	2.00926e+07	80.8	1.94036e+07	1.89828e+07	68.22	1.07	0.09	0.95913	0.02	0.985204	0.222875	166.086	121.6	2
M166T124	2.3617e+07	2.08051e+07	31.7	1.67831e+07	1.66089e+07	10.79	1.41	0.49	0.0018648	2.73	0.0275628	1.53399	166.058	124.4	2.1
M166T137	1.28311e+06	815953	95.17	140812	61127.7	91.26	9.11	3.19	0.0029526	2.53	0.0361958	1.77926	165.998	136.5	2.3
M166T139	6.16488e+06	5.86539e+06	28.28	8.19304e+06	7.74896e+06	22.42	0.75	-0.41	0.0281274	1.55	0.141969	1.33881	166.058	139.4	2.3
M166T33	7.35828e+06	7.19405e+06	10.23	4.78552e+06	5.01495e+06	14.68	1.54	0.62	0.0001554	3.81	0.00610078	2.14903	165.981	33.1	0.6
M166T332	4.80185e+06	4.84936e+06	19.93	6.26345e+06	6.29906e+06	11.74	0.77	-0.38	0.00699301	2.16	0.0602244	1.60684	166.073	331.5	5.5
M166T338_2	5.60278e+09	5.06853e+09	41.53	4.66456e+09	5.18304e+09	48.94	1.2	0.26	0.720901	0.14	0.878065	0.552651	166.086	338.4	5.6
M166T338_3	1.72845e+06	1.71352e+06	21.05	1.52712e+06	1.539e+06	9.15	1.13	0.18	0.278632	0.55	0.551712	0.829812	166.212	338.4	5.6
M166T497	608529	608589	12.66	326604	310767	22.28	1.86	0.9	0.0001554	3.81	0.00610078	2.21615	166.123	497.3	8.3
M166T524	366957	366816	57.3	282393	206485	55.46	1.3	0.38	0.573737	0.24	0.794466	0.498292	166.036	524.1	8.7
M166T799	2.66532e+06	2.8112e+06	28.99	3.47996e+06	3.58427e+06	29.59	0.77	-0.38	0.104895	0.98	0.317905	0.935924	165.983	798.9	13.3
M166T83	6.39525e+06	6.36849e+06	17.12	5.70819e+06	5.593e+06	6.94	1.12	0.16	0.234499	0.63	0.504207	1.02304	165.988	83	1.4
M166T89	3.32217e+07	3.06245e+07	20.04	3.01336e+07	2.91917e+07	13.04	1.1	0.14	0.278632	0.55	0.551712	0.757304	166.053	89.4	1.5
M167T113	1163331	1.14576e+06	9.29	1.04756e+06	1.05067e+06	16.59	1.11	0.15	0.160528	0.79	0.408129	0.975699	167.118	113.2	1.9
M167T116	1.12869e+07	8.65268e+06	69.28	1.01633e+07	7.00839e+06	92.3	1.11	0.15	0.441803	0.35	0.702485	0.339753	167.093	116.3	1.9
M167T34	1.16373e+07	1.13834e+07	10.27	8.28386e+06	1.01627e+07	50.25	1.4	0.49	0.0379176	1.42	0.171246	1.14413	166.98	33.7	0.6
M167T565	1.93814e+06	2.12697e+06	40.47	1.62422e+06	1.5064e+06	44.6	1.19	0.25	0.441803	0.35	0.702485	0.498426	167.055	565.4	9.4
M167T604	1.16816e+06	975988	47.07	1.80189e+06	1.55478e+06	61.5	0.65	-0.63	0.234499	0.63	0.504207	0.806115	167.107	603.7	10.1
M167T62	1.43982e+07	1.45013e+07	35.79	1.94564e+07	1.85595e+07	38.54	0.74	-0.43	0.278632	0.55	0.551712	0.9029	166.98	62.4	1
M167T623	2.28819e+06	2.27136e+06	34.92	2.40035e+06	2.16313e+06	39.82	0.95	-0.07	0.95913	0.02	0.985204	0.122641	167.107	623.5	10.4
M167T677	2.21591e+06	2.25387e+06	27.85	2.09175e+06	2.19519e+06	23.74	1.06	0.08	0.95913	0.02	0.985204	0.221052	167.07	677.5	11.3
M167T72	3.98824e+07	3.88178e+07	19.15	4.71771e+07	4.41723e+07	24.91	0.85	-0.24	0.234499	0.63	0.504207	0.936497	167.013	72.1	1.2
M167T762	2.73291e+06	2.43123e+06	35.13	1.9824e+06	1.98567e+06	36.53	1.38	0.46	0.234499	0.63	0.504207	1.10215	167.012	762.1	12.7
M167T823	9.55804e+07	9.53147e+07	51.36	5.5883e+07	4.02802e+07	68.09	1.71	0.77	0.0206682	1.68	0.117429	1.14051	167.07	823.2	13.7
M167T89	7.41278e+06	2.3112e+06	135.87	457742	489370	42.7	16.19	4.02	0.0379176	1.42	0.171246	1.41398	167.056	89.3	1.5
M167T99	1.06247e+06	1.01701e+06	45.53	1.00972e+06	1.05947e+06	32.57	1.05	0.07	0.95913	0.02	0.985204	0.00699556	167.081	98.9	1.6
M168T105	1.00632e+07	1.00701e+07	16.63	1.06566e+07	1.01569e+07	16.74	0.94	-0.08	0.720901	0.14	0.878065	0.418111	168.033	105.1	1.8
M168T130	5.3459e+07	5.46041e+07	20.07	5.3166e+07	5.132e+07	21.51	1.01	0.01	0.798446	0.1	0.918313	0.0412857	167.977	130	2.2
M168T152	9.791e+07	9.43119e+07	33.45	9.66873e+07	1.0844e+08	37.58	1.01	0.02	0.878477	0.06	0.952443	0.186032	167.977	152.4	2.5
M168T163	1.71249e+07	1.76231e+07	30.01	1.85919e+07	1.82463e+07	18.83	0.92	-0.12	0.720901	0.14	0.878065	0.591275	167.975	163.2	2.7
M168T194	3.72919e+07	3.36413e+07	34.83	3.66822e+07	3.76236e+07	15.35	1.02	0.02	1	0	1	0.146976	167.975	194.5	3.2
M168T231	4.30972e+07	4.44491e+07	67.8	7.50229e+07	5.96102e+07	40.06	0.57	-0.8	0.0281274	1.55	0.141969	1.27927	167.975	231.1	3.9
M168T250	1.61364e+07	1.5098e+07	29.48	1.90349e+07	1.64288e+07	46.84	0.85	-0.24	0.95913	0.02	0.985204	0.36905	167.975	249.8	4.2
M168T290	1.50924e+08	1.31795e+08	51.79	9.21354e+07	1.03403e+08	33.59	1.64	0.71	0.130381	0.88	0.362517	1.09025	167.975	289.7	4.8
M168T302	526186	514137	54.81	496957	417861	47.1	1.06	0.08	0.878477	0.06	0.952443	0.164888	168.123	302.2	5
M168T339	1.62678e+07	1.46302e+07	48	1.06921e+07	1.15172e+07	38.64	1.52	0.61	0.234499	0.63	0.504207	1.0732	168.091	338.6	5.6
M168T35	1.80916e+08	8.26648e+07	103.44	7.96521e+07	7.75772e+07	13.75	2.27	1.18	0.278632	0.55	0.551712	0.93286	167.976	34.9	0.6
M168T406	1.68474e+07	1.62103e+07	20.19	1.33427e+07	1.33514e+07	42.08	1.26	0.34	0.160528	0.79	0.408129	0.925042	167.979	405.9	6.8
M168T463	8.07077e+06	8.81113e+06	40.49	7.28145e+06	8.06954e+06	48.39	1.11	0.15	0.878477	0.06	0.952443	0.265936	167.979	462.9	7.7
M168T472	1.65192e+07	1.09051e+07	61.62	1.69656e+08	1.88383e+08	38.62	0.1	-3.36	0.0029526	2.53	0.0361958	2.01269	167.975	472.2	7.9
M168T490	5.67766e+06	5.92457e+06	31.68	4.01472e+06	4.32619e+06	42.98	1.41	0.5	0.104895	0.98	0.317905	1.04894	167.979	490.1	8.2
M168T523	1.90534e+06	128705	172.2	4.53365e+06	4.0931e+06	107.91	0.42	-1.25	0.798446	0.1	0.918313	0.146754	167.977	523.2	8.7
M168T530	6.04876e+06	5.25997e+06	36.92	5.70115e+06	5.44053e+06	15.38	1.06	0.09	0.798446	0.1	0.918313	0.0840292	168.102	530.1	8.8
M168T540	1.16404e+07	7.37483e+06	75.44	1.13194e+07	4.77048e+06	157.36	1.03	0.04	0.0649573	1.19	0.238167	0.525743	167.975	539.8	9
M168T557	6.42079e+06	6.20137e+06	41.7	8.38483e+06	9.39336e+06	39.79	0.77	-0.39	0.194872	0.71	0.457172	0.695456	167.975	556.8	9.3
M168T618	3.11926e+06	3.22735e+06	32.08	3.70701e+06	3.25443e+06	33.52	0.84	-0.25	0.505361	0.3	0.749981	0.637958	167.975	618.1	10.3
M168T62	1.24177e+08	1.2714e+08	7.36	1.44572e+08	1.39923e+08	13.63	0.86	-0.22	0.0104118	1.98	0.0771942	1.52051	167.976	62	1
M168T635	3.0871e+06	3.32529e+06	36.7	2.85551e+06	2.6754e+06	52.28	1.08	0.11	0.720901	0.14	0.878065	0.37714	167.975	634.9	10.6
M168T690	1.70716e+06	1.6432e+06	42.08	655395	660167	67.82	2.6	1.38	0.00699301	2.16	0.0602244	1.60667	167.975	689.9	11.5
M168T72_1	1.8734e+06	2.12683e+06	29.73	1.43968e+06	1.60464e+06	41.94	1.3	0.38	0.0498834	1.3	0.201689	0.84321	167.988	71.8	1.2
M168T72_2	9.9636e+06	9.44019e+06	16.79	9.30058e+06	9.35593e+06	2.24	1.07	0.1	0.573737	0.24	0.794466	0.664223	168.05	71.7	1.2
M168T720	2.58652e+06	2.40697e+06	56.85	2.2059e+06	2.19083e+06	29.2	1.17	0.23	0.878477	0.06	0.952443	0.152682	167.975	720.3	12
M168T751	5.5971e+06	5.78195e+06	57.29	3.86768e+06	3.2754e+06	38.96	1.45	0.53	0.278632	0.55	0.551712	0.769017	167.999	751	12.5
M168T77	2.62791e+06	2.67071e+06	49.03	3.80869e+06	3.77812e+06	22.05	0.69	-0.54	0.0498834	1.3	0.201689	1.23628	168.077	76.7	1.3
M168T786	6.22407e+06	6.81189e+06	27.97	5.547e+06	5.59454e+06	48.91	1.12	0.17	0.328205	0.48	0.600385	0.606517	167.999	785.8	13.1
M168T807	5.19033e+06	4.78492e+06	64.55	3.81102e+06	4.3703e+06	62.38	1.36	0.45	0.441803	0.35	0.702485	0.52826	167.998	806.5	13.4
M168T823	4.11536e+06	3.97231e+06	52.09	3.4313e+06	2.6949e+06	78.33	1.2	0.26	0.505361	0.3	0.749981	0.481339	168.074	823.1	13.7
M168T92	5.87829e+06	2.77637e+06	81.1	1.35613e+07	1.23688e+07	52.28	0.43	-1.21	0.0649573	1.19	0.238167	1.23041	168.044	91.5	1.5
M169T100	1.72605e+06	1.33289e+06	41.93	1.6002e+06	1.488e+06	34.57	1.08	0.11	0.798446	0.1	0.918313	0.27436	168.99	99.8	1.7
M169T115	4.4367e+06	4.44999e+06	22.88	3.21017e+06	3.26813e+06	37.35	1.38	0.47	0.0379176	1.42	0.171246	1.20406	168.961	114.5	1.9
M169T122_1	1.27728e+07	1.21464e+07	47.81	1.02155e+07	9.78533e+06	71.92	1.25	0.32	0.382284	0.42	0.64771	0.631771	169.035	121.5	2
M169T122_2	5.66027e+06	5.59383e+06	48.6	4.53269e+06	5.55892e+06	54.58	1.25	0.32	0.573737	0.24	0.794466	0.644118	169.061	121.6	2
M169T126	4.69482e+06	5.03416e+06	55.81	6.18648e+06	6.91318e+06	73.69	0.76	-0.4	0.505361	0.3	0.749981	0.238825	168.981	125.7	2.1
M169T137_1	8.25941e+06	7.44182e+06	32.43	8.13793e+06	7.5215e+06	22.53	1.01	0.02	0.645377	0.19	0.837808	0.00596245	168.982	137	2.3
M169T137_2	7.90537e+06	7.89126e+06	37.81	6.76582e+06	6.72326e+06	66.81	1.17	0.22	0.720901	0.14	0.878065	0.547193	169.036	136.9	2.3
M169T326	1.67165e+07	2.17148e+07	58.83	1.17288e+07	1.13736e+07	97.74	1.43	0.51	0.878477	0.06	0.952443	0.54468	169.061	326	5.4
M169T350	1.017e+07	9.41292e+06	76.74	2.85717e+06	2.89164e+06	45.73	3.56	1.83	0.0281274	1.55	0.141969	1.39923	169.097	349.6	5.8
M169T359	1.24264e+06	1.1888e+06	48.09	1.04289e+06	1.10211e+06	41.05	1.19	0.25	0.573737	0.24	0.794466	0.285112	169.061	359.5	6
M169T36	3.07415e+06	2.73704e+06	27.02	3.71297e+06	3.73053e+06	22.98	0.83	-0.27	0.160528	0.79	0.408129	0.955249	168.976	35.8	0.6
M169T380	2.0594e+06	1.8649e+06	39.96	1.82187e+06	1.87642e+06	27.13	1.13	0.18	0.645377	0.19	0.837808	0.357006	169.049	379.7	6.3
M169T417	406949	379951	44.69	482987	288611	92.53	0.84	-0.25	0.441803	0.35	0.702485	0.136959	169.061	416.8	6.9
M169T464	307592	336375	62	58736	40447.8	89.27	5.24	2.39	0.0018648	2.73	0.0275628	1.93217	169.076	464	7.7
M169T526	6.37341e+06	69630.4	273.98	206086	137782	100.21	30.93	4.95	0.798446	0.1	0.918313	0.339352	169.133	526.1	8.8
M169T530	509914	501281	24.14	493575	516178	30.15	1.03	0.05	1	0	1	0.29892	169.105	530.1	8.8
M169T62	3.59005e+06	4.06652e+06	55.07	7.41599e+06	7.04206e+06	61.58	0.48	-1.05	0.194872	0.71	0.457172	1.03949	168.977	62.3	1
M169T666	7.29315e+06	5.88598e+06	38.8	7.32263e+06	6.90824e+06	37.17	1	-0.01	0.720901	0.14	0.878065	0.0601602	169.061	665.8	11.1
M169T72	1.64085e+07	1.63839e+07	4.59	1.78321e+07	1.75706e+07	6.81	0.92	-0.12	0.0206682	1.68	0.117429	1.50526	169.046	71.7	1.2
M169T78	2.07778e+08	2.01435e+08	17.13	1.80876e+08	1.6567e+08	24.33	1.15	0.2	0.130381	0.88	0.362517	0.891138	169.095	77.6	1.3
M170T101	2.19015e+06	2.22955e+06	14.47	1.36411e+06	1.52286e+06	29.46	1.61	0.68	0.0001554	3.81	0.00610078	1.68343	170.081	100.8	1.7
M170T106	8.97109e+06	6.371e+06	105.47	1.4093e+07	1.49511e+07	64.57	0.64	-0.65	0.328205	0.48	0.600385	0.787816	170.094	106.4	1.8
M170T122	1.59798e+07	1.58976e+07	8.02	1.46225e+07	14422917	7.49	1.09	0.13	0.0649573	1.19	0.238167	1.31273	170.065	121.9	2
M170T173	1.5739e+06	1.56042e+06	19.37	2.09812e+06	1.9068e+06	21.59	0.75	-0.41	0.0029526	2.53	0.0361958	1.49497	170.065	172.6	2.9
M170T33	9.00442e+06	8.71864e+06	27.09	9.96434e+06	8.61041e+06	53.16	0.9	-0.15	0.95913	0.02	0.985204	0.0959037	169.974	33.5	0.6
M170T350	738573	798315	23.36	724531	740761	36.3	1.02	0.03	0.95913	0.02	0.985204	0.250865	170.104	349.6	5.8
M170T357	699958	648158	45.66	605087	640093	60.88	1.16	0.21	0.720901	0.14	0.878065	0.48441	169.543	356.5	5.9
M170T387	1.2708e+06	866248	84.06	2.27804e+06	2.54921e+06	45.49	0.56	-0.84	0.0829837	1.08	0.275972	1.12723	170.081	386.8	6.4
M170T397	4.92293e+06	4.70181e+06	27.52	2.60716e+06	2.4978e+06	21.81	1.89	0.92	0.000621601	3.21	0.0140919	1.99895	170.06	397.2	6.6
M170T485	1.45116e+07	1.35664e+07	41.2	1.03009e+07	9.05311e+06	31.8	1.41	0.49	0.104895	0.98	0.317905	1.04609	170.118	484.9	8.1
M170T565	355125	323029	27.41	345684	307440	53.27	1.03	0.04	0.720901	0.14	0.878065	0.346591	169.52	565.1	9.4
M170T592	191687	179791	28.36	254299	249730	49.9	0.75	-0.41	0.234499	0.63	0.504207	0.586615	170.154	592.5	9.9
M170T666	424775	464608	28.78	503039	532324	27.56	0.84	-0.24	0.328205	0.48	0.600385	0.601815	170.064	665.9	11.1
M170T699	836522	688127	64.05	1891719	2.04147e+06	56.39	0.44	-1.18	0.0379176	1.42	0.171246	1.27109	170.117	698.8	11.6
M170T73	2.55432e+06	1.34836e+06	130.24	1.9537e+06	906811	105.09	1.31	0.39	0.328205	0.48	0.600385	0.53991	169.96	73.2	1.2
M170T811	3.03832e+06	3.02443e+06	35.53	2.89363e+06	3.16376e+06	26.37	1.05	0.07	0.95913	0.02	0.985204	0.054513	170.056	810.7	13.5
M170T824	3.45703e+07	3.13474e+07	43.67	1.68496e+07	1.21504e+07	83.19	2.05	1.04	0.0206682	1.68	0.117429	1.40087	170.096	823.6	13.7
M170T94	2.42415e+07	1.94488e+07	59.55	2.20903e+07	1.54243e+07	60.68	1.1	0.13	0.720901	0.14	0.878065	0.151419	170.032	94.4	1.6
M171T101	1.31245e+07	1.31071e+07	36.18	1.15411e+07	1.35144e+07	64.18	1.14	0.19	0.573737	0.24	0.794466	0.577552	171.076	101.4	1.7
M171T108	1.88811e+06	1.73665e+06	38.96	3.82106e+06	3.95392e+06	12.87	0.49	-1.02	0.0003108	3.51	0.00894927	2.0329	171.113	108.4	1.8
M171T124	15033343	5.45293e+06	115.3	1.15965e+06	1.06168e+06	37.57	12.96	3.7	0.00699301	2.16	0.0602244	1.69379	171.149	124.4	2.1
M171T137	7.58887e+07	7.42161e+07	19.58	7.72915e+07	7.28419e+07	26.54	0.98	-0.03	0.878477	0.06	0.952443	0.0279392	170.977	136.9	2.3
M171T356	1.30975e+06	812728	74.99	994771	598723	88.72	1.32	0.4	0.328205	0.48	0.600385	0.469538	170.562	356.5	5.9
M171T511	1.05591e+06	1.04691e+06	44.94	1.24796e+06	1.11137e+06	48.12	0.85	-0.24	0.720901	0.14	0.878065	0.421101	171.101	510.8	8.5
M171T616	2.53446e+07	2.61251e+07	33.31	2.5815e+07	2.52226e+07	29.16	0.98	-0.03	0.878477	0.06	0.952443	0.184644	171.149	616.2	10.3
M171T62	1.8122e+06	1.55057e+06	59.56	2.78648e+06	2.42949e+06	43.95	0.65	-0.62	0.0829837	1.08	0.275972	1.17741	170.973	62.4	1
M171T629	2.67312e+06	2.55993e+06	33.32	1.52371e+06	1442093	23.23	1.75	0.81	0.0029526	2.53	0.0361958	1.7402	171.102	628.6	10.5
M171T65	2.87382e+07	2.72413e+07	31.38	2.39449e+07	2.34811e+07	25.53	1.2	0.26	0.382284	0.42	0.64771	0.746119	171.148	65.3	1.1
M171T684	2.19332e+06	2.37031e+06	22.87	2.14534e+06	2.34525e+06	29.8	1.02	0.03	0.798446	0.1	0.918313	0.229235	171.138	683.9	11.4
M171T72	3.73179e+06	3.87345e+06	19.59	2.92244e+06	3.08018e+06	35.95	1.28	0.35	0.130381	0.88	0.362517	1.02372	171.043	71.8	1.2
M171T773	3.00249e+06	2.80059e+06	46.68	3.19291e+06	3.41257e+06	29.11	0.94	-0.09	0.382284	0.42	0.64771	0.328925	171.138	773.3	12.9
M171T78	8.24603e+06	8.3536e+06	24.69	9.55636e+06	9.97775e+06	27.64	0.86	-0.21	0.194872	0.71	0.457172	0.517366	171.1	77.9	1.3
M171T84	5.91592e+06	7.09979e+06	59.17	9.85628e+06	8.67805e+06	85.87	0.6	-0.74	0.573737	0.24	0.794466	0.492088	171.017	83.5	1.4
M172T100	1.80455e+06	1.72603e+06	30.77	1.56142e+06	1.63215e+06	16.21	1.16	0.21	0.505361	0.3	0.749981	0.625155	172.072	99.6	1.7
M172T116	3.3524e+07	3.53138e+07	22.53	2.10876e+07	2.10437e+07	16.43	1.59	0.67	0.0010878	2.96	0.0203124	1.88396	172.097	116	1.9
M172T126_1	1.31369e+06	1.05105e+06	67.73	291314	216221	77.57	4.51	2.17	0.000621601	3.21	0.0140919	1.93153	171.977	125.9	2.1
M172T126_2	1.82051e+06	1.58089e+06	33.35	1.07355e+06	1.27583e+06	46.99	1.7	0.76	0.0206682	1.68	0.117429	1.33273	172.153	125.6	2.1
M172T137	3.6114e+06	3.82249e+06	37.92	6.2278e+06	5.70491e+06	49.07	0.58	-0.79	0.0498834	1.3	0.201689	1.25502	171.977	136.9	2.3
M172T174	320776	329022	46.14	189826	176054	77.99	1.69	0.76	0.160528	0.79	0.408129	1.04138	171.534	173.7	2.9
M172T314	4.35643e+06	4.48569e+06	14.07	4.4426e+06	4.42258e+06	11.97	0.98	-0.03	0.95913	0.02	0.985204	0.259642	172.06	313.9	5.2
M172T33	1.98616e+06	2.04825e+06	13.32	2.79344e+06	2.7107e+06	22.42	0.71	-0.49	0.00699301	2.16	0.0602244	1.62147	171.994	32.6	0.5
M172T343	3.53651e+06	2.44248e+06	75.46	4.74788e+06	3.9014e+06	52.11	0.74	-0.42	0.130381	0.88	0.362517	0.773193	172.097	343.3	5.7
M172T436	1.1243e+06	996617	74.92	973056	783983	91.91	1.16	0.21	0.573737	0.24	0.794466	0.469129	172.097	435.7	7.3
M172T486	1.39164e+06	1.50474e+06	56.2	1.91276e+06	2.01501e+06	34.56	0.73	-0.46	0.328205	0.48	0.600385	0.956134	172.043	485.6	8.1
M172T517	8.23056e+07	1.27543e+07	153.48	4.91756e+07	3.13002e+07	97.67	1.67	0.74	0.505361	0.3	0.749981	0.318012	172.133	516.5	8.6
M172T616	2.49201e+06	2.2876e+06	34.87	2.49487e+06	2.60585e+06	27.93	1	0	0.95913	0.02	0.985204	0.0769881	172.153	616.2	10.3
M172T633	447864	303504	87.72	475662	373274	68.53	0.94	-0.09	0.573737	0.24	0.794466	0.267744	172.169	632.8	10.5
M172T635	267143	113419	123.29	540434	566112	41.61	0.49	-1.02	0.0649573	1.19	0.238167	1.35469	172.133	635.1	10.6
M172T66	8.08972e+06	7.99728e+06	11.46	7.74374e+06	7.78961e+06	6.41	1.04	0.06	0.573737	0.24	0.794466	0.606906	171.993	66.4	1.1
M172T706	450370	508016	37.72	437584	420718	16.71	1.03	0.04	0.645377	0.19	0.837808	0.124031	172.206	705.7	11.8
M172T714	2.03118e+06	1.8886e+06	27.61	1.80673e+06	1.92361e+06	29.32	1.12	0.17	0.798446	0.1	0.918313	0.561437	172.133	714.2	11.9
M172T725	657433	615313	47.95	867497	780540	52.61	0.76	-0.4	0.382284	0.42	0.64771	0.525301	172.17	724.6	12.1
M172T73	702680	729897	22.9	615126	602670	19.06	1.14	0.19	0.234499	0.63	0.504207	0.755555	171.959	73.1	1.2
M172T780	1.72378e+07	1.71363e+07	61.73	1.7004e+07	1.59171e+07	43.29	1.01	0.02	0.95913	0.02	0.985204	0.325254	172.17	779.6	13
M172T815	5.91847e+06	5.30407e+06	77.97	1.50871e+07	1.48921e+07	54.5	0.39	-1.35	0.0498834	1.3	0.201689	1.5024	172.115	815.5	13.6
M172T83	2.21786e+06	1.97272e+06	32.63	2.61238e+06	2.5976e+06	10.29	0.85	-0.24	0.328205	0.48	0.600385	1.04554	172.058	82.9	1.4
M173T112	661697	579842	45.59	438971	230537	94.48	1.51	0.59	0.104895	0.98	0.317905	1.08471	173.129	111.6	1.9
M173T121	1.94554e+06	1.68288e+06	28.86	2.20179e+06	2.2328e+06	16.03	0.88	-0.18	0.160528	0.79	0.408129	0.807338	173.092	121	2
M173T137	4.43077e+06	4.48803e+06	10.54	4.29961e+06	4.19588e+06	18.48	1.03	0.04	0.720901	0.14	0.878065	0.419456	172.974	136.8	2.3
M173T33	7.28231e+06	2.03954e+06	110.52	9.68095e+06	1.17511e+07	55.63	0.75	-0.41	0.194872	0.71	0.457172	0.786851	172.977	32.6	0.5
M173T366	209045	200668	23.48	198971	197263	21.47	1.05	0.07	0.645377	0.19	0.837808	0.233693	173.092	365.5	6.1
M173T517_1	4.08025e+06	3.89599e+06	35.88	3.36356e+06	3.87737e+06	61.54	1.21	0.28	0.573737	0.24	0.794466	0.715493	173.117	516.8	8.6
M173T517_2	3.77472e+06	3.94263e+06	31.23	4.68606e+06	4.86026e+06	43.79	0.81	-0.31	0.328205	0.48	0.600385	0.43718	173.137	516.5	8.6
M173T554	1.80512e+06	1.82189e+06	25.9	1.11255e+06	1.03897e+06	33.1	1.62	0.7	0.00699301	2.16	0.0602244	1.67676	173.085	553.9	9.2
M173T558	593062	550494	42.53	663207	678997	17.02	0.89	-0.16	0.328205	0.48	0.600385	0.669805	173.071	558.2	9.3
M173T599	82620.8	68256	40.08	72897.7	76262.4	38.48	1.13	0.18	0.798446	0.1	0.918313	0.497724	173.141	598.6	10
M173T780	1.43777e+06	1.33149e+06	30.84	1.82323e+06	1.81666e+06	36.13	0.79	-0.34	0.194872	0.71	0.457172	0.699762	173.173	779.6	13
M173T87	2.22514e+06	2.17329e+06	35.06	2.13993e+06	2.2231e+06	34.38	1.04	0.06	0.720901	0.14	0.878065	0.143909	173.042	87	1.4
M173T89	4.46984e+06	3.96179e+06	54.7	6.06619e+06	6.10648e+06	59.88	0.74	-0.44	0.505361	0.3	0.749981	0.554342	173.021	89.1	1.5
M174T115	2.20289e+06	2.62395e+06	50.44	1.87133e+06	1.79078e+06	47.25	1.18	0.24	0.645377	0.19	0.837808	0.0163165	174.076	114.9	1.9
M174T356	1.33531e+06	1.25584e+06	23.52	1.20421e+06	1.14985e+06	21.73	1.11	0.15	0.573737	0.24	0.794466	0.60803	174.113	356.4	5.9
M174T418	1.19194e+06	1.08551e+06	46.7	1.0627e+06	1.17925e+06	42.51	1.12	0.17	0.95913	0.02	0.985204	0.422378	174.058	418	7
M174T450	1.36084e+06	1.1601e+06	61.52	2.49244e+06	2.06226e+06	44.97	0.55	-0.87	0.0379176	1.42	0.171246	1.48933	174.055	449.6	7.5
M174T454	95621.1	64460.7	105.29	235850	93891.5	165.54	0.41	-1.3	0.878477	0.06	0.952443	0.148044	174.002	454	7.6
M174T492	289098	260745	71.26	392993	428557	60.27	0.74	-0.44	0.328205	0.48	0.600385	0.225372	174.149	492.3	8.2
M174T500	1.92979e+06	1.18376e+06	111.35	1.28674e+06	1.18124e+06	74.57	1.5	0.58	0.720901	0.14	0.878065	0.622158	174.113	500.2	8.3
M174T539	1.92546e+06	1.90051e+06	30.87	1.65994e+06	1.66618e+06	35.73	1.16	0.21	0.573737	0.24	0.794466	0.570483	174.185	538.6	9
M174T565	377485	333171	67.81	199059	205614	37.08	1.9	0.92	0.0379176	1.42	0.171246	1.19541	174.059	565	9.4
M174T578	3.6798e+06	3.4624e+06	33.97	3.83478e+06	3.70395e+06	58.06	0.96	-0.06	1	0	1	0.197298	174.185	577.7	9.6
M174T72	3.00316e+06	2.9842e+06	23.81	2.62089e+06	2.46572e+06	23.46	1.15	0.2	0.278632	0.55	0.551712	0.752053	174.025	71.8	1.2
M174T75	462456	426340	29.97	415536	380208	27.44	1.11	0.15	0.645377	0.19	0.837808	0.419779	174.069	75.2	1.3
M174T824	3.53285e+06	3.17032e+06	62.67	1.27684e+07	1.31512e+07	52.36	0.28	-1.85	0.0104118	1.98	0.0771942	1.34739	174.128	824.3	13.7
M174T98	1.57107e+06	1.75411e+06	77.06	976065	451145	88.19	1.61	0.69	0.645377	0.19	0.837808	0.502424	174.076	98.2	1.6
M175T102	3.36108e+06	2.73433e+06	70.72	746329	372120	115.26	4.5	2.17	0.0104118	1.98	0.0771942	1.66919	174.972	102.1	1.7
M175T103_1	1.5871e+07	1.61236e+07	13.82	1.6987e+07	1.7107e+07	13.24	0.93	-0.1	0.382284	0.42	0.64771	0.610216	175.071	103.4	1.7
M175T103_2	2.28582e+07	2.26004e+07	14.88	2.08981e+07	2.10592e+07	4.09	1.09	0.13	0.645377	0.19	0.837808	0.92889	175.108	103.4	1.7
M175T113	1.18075e+07	1.26779e+07	54.04	1.60377e+07	1.63661e+07	17.05	0.74	-0.44	0.278632	0.55	0.551712	0.992824	175.071	112.7	1.9
M175T122	4.0397e+06	3.82337e+06	20.43	4.29703e+06	4.51029e+06	24.46	0.94	-0.09	0.573737	0.24	0.794466	0.283877	175.053	122.3	2
M175T280	2.81474e+06	2.68731e+06	16.85	1.24329e+06	1.14858e+06	45.12	2.26	1.18	0.0003108	3.51	0.00894927	2.03973	174.534	280.1	4.7
M175T350	409105	414091	33.98	429658	471323	34.06	0.95	-0.07	0.505361	0.3	0.749981	0.0086921	175.06	349.9	5.8
M175T387	954082	944142	40.14	74346.2	69703.9	31.55	12.83	3.68	0.0001554	3.81	0.00610078	2.40904	175.06	386.6	6.4
M175T396	684611	657923	24.49	857246	672210	52.68	0.8	-0.32	0.441803	0.35	0.702485	0.664202	175.087	396	6.6
M175T441	2.47872e+06	2.49158e+06	18.67	3.01627e+06	2.84123e+06	55.34	0.82	-0.28	0.798446	0.1	0.918313	0.180396	175.079	440.5	7.3
M175T447	126271	120523	49.85	313692	269807	45.61	0.4	-1.31	0.0029526	2.53	0.0361958	1.80507	175.03	446.8	7.4
M175T578	200090	150959	91.46	188400	136621	100.06	1.06	0.09	0.95913	0.02	0.985204	0.136015	175.189	577.9	9.6
M175T65	1.6348e+06	1.73536e+06	24.61	1.51124e+06	1.48344e+06	15.74	1.08	0.11	0.505361	0.3	0.749981	0.326904	175.09	65	1.1
M175T652	424204	386434	64.24	1.21096e+06	957533	64.19	0.35	-1.51	0.014763	1.83	0.0952789	1.4501	175.096	652.1	10.9
M175T744	2.76833e+07	2.72013e+07	35.92	2.48417e+07	2.47137e+07	12.61	1.11	0.16	0.645377	0.19	0.837808	0.207913	175.148	744.2	12.4
M175T758	4.14112e+06	3.64049e+06	50.9	9.2991e+06	7.8427e+06	51.64	0.45	-1.17	0.0104118	1.98	0.0771942	1.62553	175.112	757.6	12.6
M175T80	6.81252e+07	6.49464e+07	19.23	6.12678e+07	6.15595e+07	5	1.11	0.15	0.104895	0.98	0.317905	0.797155	174.938	80.1	1.3
M175T82	1.67336e+07	1.31636e+07	41.12	1.66444e+07	1.24305e+07	74.73	1.01	0.01	0.382284	0.42	0.64771	0.229509	174.896	82.3	1.4
M175T83_1	3.87135e+08	3.53399e+08	25.98	3.45086e+08	3.75589e+08	49.68	1.12	0.17	0.878477	0.06	0.952443	0.613871	175.119	83.2	1.4
M175T83_2	5.57108e+06	5.55317e+06	5.87	4.7545e+06	5.44322e+06	36.69	1.17	0.23	0.95913	0.02	0.985204	0.904794	175.144	82.8	1.4
M176T103	1.74327e+06	1.72265e+06	83.44	380913	409489	34.24	4.58	2.19	0.160528	0.79	0.408129	1.37916	176.111	103.4	1.7
M176T104	1.02364e+06	1.05031e+06	30.36	1.09011e+06	1.10141e+06	5.9	0.94	-0.09	0.95913	0.02	0.985204	0.581212	176.075	103.6	1.7
M176T105	2.52745e+06	2.5746e+06	44.74	2.34187e+06	2.42974e+06	27.21	1.08	0.11	0.720901	0.14	0.878065	0.0189124	176.165	105.1	1.8
M176T106	9.4743e+06	1.11635e+07	58.66	2.78172e+06	517223	170.96	3.41	1.77	0.0379176	1.42	0.171246	1.45872	176.092	106.5	1.8
M176T110	6.46708e+06	3.6348e+06	88.59	1.2112e+07	1.06038e+07	73.04	0.53	-0.91	0.104895	0.98	0.317905	0.970764	176.128	110.4	1.8
M176T112	922836	885286	60.29	1.20446e+06	1.17515e+06	32.92	0.77	-0.38	0.328205	0.48	0.600385	0.782989	176.075	112.4	1.9
M176T115	614631	219363	112.38	1.73233e+06	1.24773e+06	80.57	0.35	-1.49	0.014763	1.83	0.0952789	1.65709	176.092	115.2	1.9
M176T116	1.35329e+06	1.26051e+06	62.69	838344	909470	32.14	1.61	0.69	0.278632	0.55	0.551712	0.783073	176.038	116.4	1.9
M176T121	7.53938e+06	8.48201e+06	33.88	8.56904e+06	8.27919e+06	18.17	0.88	-0.18	0.573737	0.24	0.794466	0.686265	176.128	121.4	2
M176T192	5.50357e+06	5.51049e+06	41.16	5.49113e+06	3.8416e+06	74.67	1	0	0.573737	0.24	0.794466	0.187573	176.037	192.2	3.2
M176T219	6.89532e+06	7.62638e+06	40.89	7.90742e+06	8.09701e+06	18.77	0.87	-0.2	0.573737	0.24	0.794466	0.67948	176.037	219.4	3.7
M176T351	123841	128360	42.89	126126	109844	46.87	0.98	-0.03	0.798446	0.1	0.918313	0.0223178	176.118	350.8	5.8
M176T375	3.91747e+06	4.09842e+06	29.12	4.56108e+06	4.82689e+06	40.03	0.86	-0.22	0.382284	0.42	0.64771	0.313134	176.037	375	6.2
M176T376	561015	542457	21.26	611657	504842	61.52	0.92	-0.12	0.720901	0.14	0.878065	0.0210059	176.107	376.3	6.3
M176T441	240530	248515	26.72	189475	179467	36.61	1.27	0.34	0.194872	0.71	0.457172	1.00758	176.082	440.5	7.3
M176T479	361741	130753	178.1	328172	140623	158.81	1.1	0.14	0.95913	0.02	0.985204	0.117704	176.128	479.3	8
M176T534	747634	790743	36.11	667167	668138	24.83	1.12	0.16	0.382284	0.42	0.64771	0.203195	176.071	534.1	8.9
M176T727	952190	1.03012e+06	22.31	1024147	872418	57.08	0.93	-0.11	0.573737	0.24	0.794466	0.167966	176.107	726.9	12.1
M176T744	2.01061e+06	2.01848e+06	28.41	1.71e+06	1.62474e+06	27.47	1.18	0.23	0.382284	0.42	0.64771	0.713264	176.151	744.1	12.4
M176T80	1.44029e+06	1.43922e+06	31.08	1.43996e+06	1.55028e+06	29.48	1	0	0.720901	0.14	0.878065	0.0777888	175.941	80	1.3
M176T83	4.77604e+07	4.4256e+07	44.02	3.70427e+07	2.94661e+07	47.98	1.29	0.37	0.441803	0.35	0.702485	0.729452	176.122	83.2	1.4
M176T89	8.7657e+07	9.29385e+07	44.89	1.04193e+08	1.1355e+08	59.47	0.84	-0.25	0.505361	0.3	0.749981	0.155334	176.103	88.9	1.5
M176T98	1.59363e+06	1.59306e+06	15.85	1.59675e+06	1.72263e+06	32.16	1	0	0.878477	0.06	0.952443	0.24384	176.037	98.3	1.6
M177T100	1.27611e+06	1.08592e+06	73.75	247830	240951	14.93	5.15	2.36	0.0104118	1.98	0.0771942	1.83362	177.065	100	1.7
M177T107	243201	254206	38.55	356097	307870	45.92	0.68	-0.55	0.160528	0.79	0.408129	1.06224	177.095	106.7	1.8
M177T110	900168	660676	55.75	1.67289e+06	1.45214e+06	59.6	0.54	-0.89	0.0206682	1.68	0.117429	1.20444	177.132	110.4	1.8
M177T113_1	857872	634922	75.24	762867	537251	95.92	1.12	0.17	0.720901	0.14	0.878065	0.190292	177.022	112.5	1.9
M177T113_2	512839	277572	72.52	543685	448702	55.18	0.94	-0.08	0.798446	0.1	0.918313	0.230759	177.039	112.6	1.9
M177T115	613857	455617	77.23	599883	599536	50.42	1.02	0.03	1	0	1	0.120801	176.998	114.5	1.9
M177T310	2.21073e+06	2.33299e+06	74.66	1.60833e+06	1.77839e+06	43.82	1.37	0.46	0.441803	0.35	0.702485	0.0512423	177.102	309.5	5.2
M177T328	4.2108e+06	4.06444e+06	25	2.13404e+06	2.30468e+06	25.64	1.97	0.98	0.0001554	3.81	0.00610078	2.0254	177.106	327.7	5.5
M177T33	1.08985e+07	1.02196e+07	21.06	9.59705e+06	9.59748e+06	10.03	1.14	0.18	0.234499	0.63	0.504207	0.91736	176.971	32.8	0.5
M177T353	1.5073e+06	1.43422e+06	25.68	1.9823e+06	1.73531e+06	34.7	0.76	-0.4	0.130381	0.88	0.362517	1.11545	177.112	353.4	5.9
M177T595	984684	1.08558e+06	44.53	1.50868e+06	1.40876e+06	45.52	0.65	-0.62	0.104895	0.98	0.317905	1.0883	177.127	595.5	9.9
M177T62	8.45151e+06	7.81066e+06	18.36	7.49954e+06	7.64687e+06	6.5	1.13	0.17	0.441803	0.35	0.702485	1.00713	176.971	62.2	1
M177T621	6.68663e+06	6.89706e+06	39.47	1.08392e+07	7.36819e+06	73.46	0.62	-0.7	0.441803	0.35	0.702485	0.542015	177.127	621.4	10.4
M177T65	2.40598e+06	2.44734e+06	21.27	1.80361e+06	1.68768e+06	32.21	1.33	0.42	0.0649573	1.19	0.238167	1.24428	177.014	64.8	1.1
M177T751	2.30096e+06	2.32548e+06	62.15	962494	838636	43.45	2.39	1.26	0.104895	0.98	0.317905	1.28219	177.164	750.8	12.5
M177T78	1.87016e+06	1.80843e+06	8.83	1.42568e+06	1.67132e+06	34.2	1.31	0.39	0.004662	2.33	0.0475536	1.26121	177.061	77.9	1.3
M177T781	8.92342e+06	8.76296e+06	38.68	1.08366e+07	1.25375e+07	50.19	0.82	-0.28	0.328205	0.48	0.600385	0.125421	177.127	781.2	13
M177T785	1.88281e+06	1.6198e+06	58.67	1.99017e+06	1.27373e+06	77.11	0.95	-0.08	0.720901	0.14	0.878065	0.09744	177.055	784.8	13.1
M177T80	4.20347e+06	4.13323e+06	12.04	5.30857e+06	5.25224e+06	19.69	0.79	-0.34	0.0206682	1.68	0.117429	1.46297	176.936	80.1	1.3
M177T89	7.6811e+06	8.27159e+06	22.55	8.53117e+06	8.60449e+06	11.04	0.9	-0.15	0.278632	0.55	0.551712	0.797294	177.106	89	1.5
M177T91	1.56499e+06	1.54286e+06	6.93	1.51448e+06	1.53219e+06	9.18	1.03	0.05	0.645377	0.19	0.837808	0.55406	177.087	91.3	1.5
M178T105	1.94107e+06	1.94127e+06	37.69	1.43595e+06	1.3176e+06	65.98	1.35	0.43	0.278632	0.55	0.551712	0.980864	178.053	104.7	1.7
M178T107	1.28805e+06	1.36488e+06	40.09	1.73005e+06	1.46616e+06	34.37	0.74	-0.43	0.194872	0.71	0.457172	0.913602	178.085	106.7	1.8
M178T348	377917	368213	30.92	317058	322093	23.94	1.19	0.25	0.278632	0.55	0.551712	0.751634	178.053	348.3	5.8
M178T403	2.08883e+07	1.40892e+07	59.08	1.53691e+07	1.45781e+07	32.56	1.36	0.44	0.798446	0.1	0.918313	0.57849	178.134	402.7	6.7
M178T428	1.02235e+06	996255	21.8	1.89503e+06	1.83673e+06	21.6	0.54	-0.89	0.0003108	3.51	0.00894927	2.10405	178.086	427.8	7.1
M178T619	1.41255e+06	1.38083e+06	19.32	1.06088e+06	996255	33.02	1.33	0.41	0.0498834	1.3	0.201689	1.37127	178.036	618.7	10.3
M178T621	568457	604269	33.58	868292	907433	59.83	0.65	-0.61	0.328205	0.48	0.600385	0.500758	178.131	621.4	10.4
M178T635	792545	834199	29.98	920816	660329	52.49	0.86	-0.22	0.645377	0.19	0.837808	0.266717	178.159	634.8	10.6
M178T667	1.16525e+06	966427	68.88	692366	424108	100.26	1.68	0.75	0.104895	0.98	0.317905	1.04579	178.099	667.2	11.1
M178T671	749742	634064	44.69	908167	890392	43.06	0.83	-0.28	0.441803	0.35	0.702485	0.42596	178.123	671	11.2
M178T769	4.34448e+06	4.26738e+06	26.74	3.88421e+06	3.76815e+06	23.02	1.12	0.16	0.441803	0.35	0.702485	0.502766	178.123	768.6	12.8
M178T781	427946	377022	34.64	549408	500794	30.81	0.78	-0.36	0.130381	0.88	0.362517	1.0584	178.131	781.1	13
M178T81	2.58424e+07	2.46008e+07	11.56	2.45882e+07	2.4756e+07	3.25	1.05	0.07	0.645377	0.19	0.837808	0.695304	178.058	80.7	1.3
M178T90	4.2238e+06	4.17577e+06	15.69	5.0227e+06	5.39862e+06	26.97	0.84	-0.25	0.130381	0.88	0.362517	0.72241	178.071	89.5	1.5
M179T116	233044	219397	22.41	318523	328266	21.36	0.73	-0.45	0.0281274	1.55	0.141969	1.50187	179.082	115.6	1.9
M179T346	619425	358646	117.73	752859	741937	66.2	0.82	-0.28	0.234499	0.63	0.504207	0.204834	179.082	345.7	5.8
M179T356	2.84715e+06	2.25628e+06	76.87	3.78449e+06	3.54535e+06	42.18	0.75	-0.41	0.234499	0.63	0.504207	0.858132	178.549	356.5	5.9
M179T403	1.98791e+06	1.51443e+06	83.61	1.40857e+06	1.4079e+06	50.02	1.41	0.5	0.720901	0.14	0.878065	0.121002	179.137	402.7	6.7
M179T415	375641	306177	73.51	776595	664806	68.9	0.48	-1.05	0.130381	0.88	0.362517	0.982494	179.154	415.2	6.9
M179T472	6.82102e+06	6.94307e+06	44.94	7.50656e+06	6.8347e+06	54.7	0.91	-0.14	0.878477	0.06	0.952443	0.110205	179.092	472.2	7.9
M179T544	4.79275e+06	3.93968e+06	59.87	8.06908e+06	7.89754e+06	52.02	0.59	-0.75	0.130381	0.88	0.362517	0.892733	179.063	543.8	9.1
M179T576	1.20681e+06	1.10403e+06	27.79	1.20068e+06	1.12323e+06	40.83	1.01	0.01	0.95913	0.02	0.985204	0.279901	179.118	575.9	9.6
M179T700	2.91943e+06	2.48458e+06	69.89	1.35304e+06	949576	99.94	2.16	1.11	0.104895	0.98	0.317905	1.26536	179.143	700.1	11.7
M179T707	2.42675e+06	2.43462e+06	55.75	1.49488e+06	1.47308e+06	43.18	1.62	0.7	0.234499	0.63	0.504207	0.784058	179.107	707.4	11.8
M179T72	4.10142e+06	3.49288e+06	65.65	1.3751e+06	1.28597e+06	80.6	2.98	1.58	0.0379176	1.42	0.171246	1.29132	179.496	71.8	1.2
M179T767	4.04901e+06	2.6594e+06	86.85	9.02231e+06	6.40759e+06	66.21	0.45	-1.16	0.0281274	1.55	0.141969	1.39391	179.107	767.4	12.8
M179T794	2.96524e+07	2.96181e+07	23.77	3.27219e+07	3.32782e+07	33.6	0.91	-0.14	0.645377	0.19	0.837808	0.311787	179.107	794.1	13.2
M179T83	7.50563e+06	7.89255e+06	15.17	8.03732e+06	7.69164e+06	40.5	0.93	-0.1	0.798446	0.1	0.918313	0.0264642	179.09	82.7	1.4
M179T92	2.13383e+07	1.88278e+07	87.29	1.95091e+07	2.45198e+07	58.9	1.09	0.13	1	0	1	0.272516	179.129	92	1.5
M179T96	2.33416e+07	2.46431e+07	49.91	1.73315e+07	1.72248e+07	62.06	1.35	0.43	0.234499	0.63	0.504207	0.723373	179.129	96.5	1.6
M180T107	822207	551556	91.84	1.96939e+06	2.10712e+06	35	0.42	-1.26	0.00699301	2.16	0.0602244	1.69972	180.069	107.4	1.8
M180T114	1.54911e+06	1.72878e+06	43.47	818067	643678	86.7	1.89	0.92	0.0379176	1.42	0.171246	1.2275	180.069	113.6	1.9
M180T126	682274	660379	30.78	917896	830902	46.14	0.74	-0.43	0.278632	0.55	0.551712	0.86267	180.102	125.8	2.1
M180T323	2.32921e+06	2.5366e+06	40.19	2.71651e+06	2.7592e+06	53.92	0.86	-0.22	0.441803	0.35	0.702485	0.287881	180.065	323	5.4
M180T353	3.32903e+06	3.06528e+06	35.74	2.70501e+06	2.89792e+06	47.08	1.23	0.3	0.441803	0.35	0.702485	0.710419	180.088	353.3	5.9
M180T373	1.25718e+06	29180	181.17	2.34085e+06	1.92065e+06	107.76	0.54	-0.9	0.382284	0.42	0.64771	0.648564	180.066	373.3	6.2
M180T537	3.20153e+06	3.20155e+06	24.74	2.31484e+06	2.03931e+06	52.76	1.38	0.47	0.160528	0.79	0.408129	1.11607	180.102	537.2	9
M180T575	484247	441023	35.94	343328	356982	41.99	1.41	0.5	0.130381	0.88	0.362517	1.11691	180.16	574.6	9.6
M180T667	611277	556059	51.12	484301	459104	55.95	1.26	0.34	0.645377	0.19	0.837808	0.681599	180.097	667.2	11.1
M180T690	1.99245e+06	1.97782e+06	28.88	1.00454e+06	1.0332e+06	39.57	1.98	0.99	0.0029526	2.53	0.0361958	1.76742	180.175	689.9	11.5
M180T71	1.51423e+06	1.49466e+06	5.14	1.45776e+06	1.48676e+06	5.47	1.04	0.05	0.441803	0.35	0.702485	0.859477	179.997	71.4	1.2
M180T72	800011	763248	48.08	816239	790706	19	0.98	-0.03	0.878477	0.06	0.952443	0.43714	180.495	71.8	1.2
M180T794	3.2221e+06	2.98592e+06	26.25	3.5253e+06	3.458e+06	7.23	0.91	-0.13	0.328205	0.48	0.600385	0.718827	180.11	794.1	13.2
M180T813	160838	115507	54.22	161228	174133	30.26	1	0	0.878477	0.06	0.952443	0.228623	180.138	813.2	13.6
M180T83	4.56447e+06	4.27631e+06	13.11	2.12107e+06	2.25406e+06	43.23	2.15	1.11	0.0001554	3.81	0.00610078	1.72571	179.982	83.2	1.4
M180T92	2.99837e+06	2.92115e+06	30.86	3.83251e+06	3.82271e+06	14.55	0.78	-0.35	0.0379176	1.42	0.171246	1.31625	179.63	91.6	1.5
M180T99	4.4732e+06	4.35217e+06	18.07	4.60018e+06	4.3246e+06	27.57	0.97	-0.04	0.878477	0.06	0.952443	0.121303	179.63	98.5	1.6
M181T115_1	1.02654e+06	1.07982e+06	52.24	1.12673e+06	710530	107.32	0.91	-0.13	0.720901	0.14	0.878065	0.437365	181.036	114.9	1.9
M181T115_2	410102	365424	32.43	199970	228363	35.43	2.05	1.04	0.0001554	3.81	0.00610078	1.81349	181.053	115	1.9
M181T319	2.37081e+06	2.16093e+06	81.54	44595.1	34145.3	83.04	53.16	5.73	0.0029526	2.53	0.0361958	2.11283	181.064	319.5	5.3
M181T455	490706	500864	41.15	451764	407215	39.57	1.09	0.12	0.645377	0.19	0.837808	0.0929893	181.05	454.8	7.6
M181T461	6.03215e+06	4.36131e+06	88.87	722652	657274	77.08	8.35	3.06	0.00699301	2.16	0.0602244	1.54152	181.097	460.5	7.7
M181T544	190671	159209	43.85	310429	297488	56.77	0.61	-0.7	0.234499	0.63	0.504207	0.916173	181.06	543.8	9.1
M181T611	746069	765843	69.81	1.27611e+06	1.34345e+06	35.96	0.58	-0.77	0.0829837	1.08	0.275972	1.22478	181.122	611.5	10.2
M181T626	673502	633955	22.68	636750	654258	25.52	1.06	0.08	0.95913	0.02	0.985204	0.302713	181.086	626.4	10.4
M181T655	1.53199e+06	1.18152e+06	71.73	463298	423227	68.04	3.31	1.73	0.014763	1.83	0.0952789	1.64585	181.159	655.4	10.9
M181T686	659434	749632	33.9	693384	711231	41.44	0.95	-0.07	0.645377	0.19	0.837808	0.0842055	181.086	686.1	11.4
M181T69	1.17879e+06	1.23851e+06	39.53	1.36064e+06	1.36179e+06	17.85	0.87	-0.21	0.505361	0.3	0.749981	0.689707	180.99	68.9	1.1
M181T690	936184	917003	30.91	545487	577459	31.54	1.72	0.78	0.00699301	2.16	0.0602244	1.52453	181.159	689.9	11.5
M181T70	1.07869e+06	1.11229e+06	8.45	873054	862976	12.6	1.24	0.31	0.0029526	2.53	0.0361958	1.79519	180.621	70	1.2
M181T752	6.00132e+06	6.04008e+06	11.18	3.88949e+06	4100128	25.3	1.54	0.63	0.0003108	3.51	0.00894927	1.85702	181.122	752.4	12.5
M181T770	4.13597e+06	4.10966e+06	26.44	2.41169e+06	2.28287e+06	31.66	1.71	0.78	0.004662	2.33	0.0475536	1.71713	181.159	770.5	12.8
M182T122	8.53379e+06	8.54562e+06	34.99	6.85666e+06	6.26879e+06	36.99	1.24	0.32	0.278632	0.55	0.551712	0.648565	182.104	121.6	2
M182T124	9.60123e+08	9.33783e+08	16.41	9.75679e+08	9.44448e+08	20.47	0.98	-0.02	0.95913	0.02	0.985204	0.129561	182.081	124.3	2.1
M182T140	4.67557e+08	5.18797e+08	40.19	5.0587e+08	5.11351e+08	12.01	0.92	-0.11	0.95913	0.02	0.985204	0.589031	182.081	139.6	2.3
M182T145	1.20644e+07	1.49642e+07	52.67	1.22056e+07	1.22175e+07	23.88	0.99	-0.02	0.382284	0.42	0.64771	0.442438	182.104	144.6	2.4
M182T191	2.67675e+08	2.3663e+08	32.96	2.48269e+08	2.99854e+08	55.01	1.08	0.11	0.720901	0.14	0.878065	0.552734	182.081	190.9	3.2
M182T291	2.60741e+06	2.63046e+06	16.15	2.12873e+06	2.13737e+06	21.27	1.22	0.29	0.0498834	1.3	0.201689	1.25068	182.103	291.2	4.9
M182T327	1.00065e+07	1.00307e+07	24.1	1.19768e+07	9.49257e+06	51.88	0.84	-0.26	0.95913	0.02	0.985204	0.437304	182.081	327.5	5.5
M182T360	113323	115223	10.91	126131	125862	14.73	0.9	-0.15	0.130381	0.88	0.362517	0.945619	182.139	359.8	6
M182T460	305341	26792	173.81	553406	158977	122.37	0.55	-0.86	0.441803	0.35	0.702485	0.296167	182.105	460.4	7.7
M182T565	2.1513e+06	2.0516e+06	39.52	1.68114e+06	1.60464e+06	43.43	1.28	0.36	0.234499	0.63	0.504207	0.805698	182.048	565.1	9.4
M182T597	2.41557e+07	2.22745e+07	20.47	1.59163e+07	1.70767e+07	33.56	1.52	0.6	0.00699301	2.16	0.0602244	1.39988	182.118	596.7	9.9
M182T64_2	6.37333e+06	4.9835e+06	46.96	7.86432e+06	6.91696e+06	71.22	0.81	-0.3	0.645377	0.19	0.837808	0.172199	182.028	63.7	1.1
M182T720	1.12867e+06	890513	59.94	989598	701972	53.45	1.14	0.19	0.573737	0.24	0.794466	0.347742	182.118	720.4	12
M182T804	1.41645e+06	1.12466e+06	59.66	1.1166e+06	985541	51.76	1.27	0.34	0.720901	0.14	0.878065	0.529003	182.009	804.4	13.4
M182T83	9.2118e+06	8.82427e+06	32.25	1.24466e+07	1.23619e+07	7.24	0.74	-0.43	0.014763	1.83	0.0952789	1.55979	181.961	82.9	1.4
M182T92	3.93317e+07	3.63789e+07	26.05	4.4795e+07	4.34819e+07	11.27	0.88	-0.19	0.234499	0.63	0.504207	0.967921	182.048	92.1	1.5
M183T105	2.05577e+06	2.00546e+06	26.42	2.25815e+06	2.13257e+06	50.51	0.91	-0.14	0.878477	0.06	0.952443	0.0580396	183.113	105.4	1.8
M183T124	6.00889e+07	5.39608e+07	30.9	9.91456e+07	9.25362e+07	34.52	0.61	-0.72	0.0206682	1.68	0.117429	1.57304	183.084	124.4	2.1
M183T134	1.80597e+07	1.66438e+07	55.11	6.82866e+06	6.38717e+06	21.03	2.64	1.4	0.0003108	3.51	0.00894927	1.86338	182.985	133.6	2.2
M183T140	6.08296e+07	6.20536e+07	35.96	9.05028e+07	9.83113e+07	28.54	0.67	-0.57	0.0206682	1.68	0.117429	1.1266	183.083	139.6	2.3
M183T191	3.21026e+07	2.71178e+07	27.48	3.30232e+07	3.33303e+07	32.75	0.97	-0.04	0.441803	0.35	0.702485	0.083171	183.084	191	3.2
M183T203	3.52229e+06	3.51495e+06	9.71	2.787e+06	3.33305e+06	39.33	1.26	0.34	0.0829837	1.08	0.275972	0.995903	182.997	203	3.4
M183T37	3.26037e+07	2.40186e+07	63.44	3.1235e+07	2.47906e+07	58.54	1.04	0.06	0.95913	0.02	0.985204	0.0436955	182.985	36.8	0.6
M183T400	2.17378e+06	1.80832e+06	43.08	1.93474e+06	2.1771e+06	23.49	1.12	0.17	0.95913	0.02	0.985204	0.273505	183.021	399.5	6.7
M183T538	4.72203e+06	4.17781e+06	37.96	4.64199e+06	4.21543e+06	18.98	1.02	0.02	0.505361	0.3	0.749981	0.059752	183.194	538.3	9
M183T565	261772	249134	22.23	187624	177609	45.25	1.4	0.48	0.0829837	1.08	0.275972	1.24734	182.549	565.1	9.4
M183T590	452446	426998	27.23	516310	507102	30.81	0.88	-0.19	0.505361	0.3	0.749981	0.52949	183.149	590.3	9.8
M183T597	3.51106e+06	3.68564e+06	63.33	2.99907e+06	2.77932e+06	60.7	1.17	0.23	0.798446	0.1	0.918313	0.329572	183.121	596.7	9.9
M183T604	1.22316e+07	1.12156e+07	53.13	1.38959e+07	1.41328e+07	62.42	0.88	-0.18	0.878477	0.06	0.952443	0.147407	183.078	603.5	10.1
M183T648	2.47145e+06	2.19985e+06	40.35	1.087e+06	1.04565e+06	39.16	2.27	1.19	0.0010878	2.96	0.0203124	1.84218	183.138	647.5	10.8
M183T69	7.50052e+07	7.94055e+07	44.55	6.15109e+07	6.59163e+07	58.1	1.22	0.29	0.573737	0.24	0.794466	0.531284	182.987	68.7	1.1
M183T72	4.67144e+06	4.56248e+06	7.31	3.9476e+06	3.97388e+06	5.76	1.18	0.24	0.0001554	3.81	0.00610078	2.0339	182.962	71.6	1.2
M183T730	2.9305e+06	2.10028e+06	69.12	993107	666220	59.56	2.95	1.56	0.00699301	2.16	0.0602244	1.69477	183.102	730.1	12.2
M183T744	1.42735e+06	1.47917e+06	7.76	1.22264e+06	1.23996e+06	14.43	1.17	0.22	0.0104118	1.98	0.0771942	1.43334	183.174	744.3	12.4
M183T75	255998	308034	85.91	23927.3	22677.3	65.07	10.7	3.42	0.130381	0.88	0.362517	1.41054	182.527	75.3	1.3
M183T762	4.07742e+08	3.47672e+08	78.44	2.17269e+08	1.73855e+08	47.67	1.88	0.91	0.104895	0.98	0.317905	1.04792	182.987	762.5	12.7
M183T77	589673	580676	11.6	549999	552410	13.68	1.07	0.1	0.328205	0.48	0.600385	0.686654	183.11	77.1	1.3
M183T772	1.65846e+08	1.34652e+08	57.75	2.79577e+08	2.44908e+08	57.31	0.59	-0.75	0.0498834	1.3	0.201689	1.18006	182.986	771.5	12.9
M183T809	1.41663e+08	1.36665e+08	36.76	1.16552e+08	1.24908e+08	25.55	1.22	0.28	0.441803	0.35	0.702485	0.60775	182.986	808.6	13.5
M183T811	2.78583e+07	2.81371e+07	45.87	2.29121e+07	2.01753e+07	46.98	1.22	0.28	0.441803	0.35	0.702485	0.589852	183.08	810.9	13.5
M183T82	6.53151e+06	6.65589e+06	10.36	2.81027e+06	2.77285e+06	16.73	2.32	1.22	0.0001554	3.81	0.00610078	2.3513	182.902	81.9	1.4
M183T92	1.74279e+06	1.65775e+06	18.29	1.52182e+06	1.55424e+06	7.74	1.15	0.2	0.104895	0.98	0.317905	1.09721	183.051	91.9	1.5
M183T98	2.14628e+06	2.50183e+06	57.8	4.06668e+06	3.03136e+06	59.04	0.53	-0.92	0.160528	0.79	0.408129	1.29626	182.977	97.7	1.6
M184T105	1.34832e+06	1.19219e+06	57.44	1.87966e+06	1.51705e+06	53.08	0.72	-0.48	0.234499	0.63	0.504207	0.871937	183.543	104.5	1.7
M184T107	2.36725e+06	1.87362e+06	44.15	3.9761e+06	3793377	35.96	0.6	-0.75	0.0649573	1.19	0.238167	1.44419	184.027	107.4	1.8
M184T114	722523	747530	26.73	808746	829400	25.94	0.89	-0.16	0.645377	0.19	0.837808	0.507659	183.969	114.2	1.9
M184T125	6.23122e+06	6.23912e+06	18.11	6.04774e+06	6.13561e+06	17.24	1.03	0.04	0.95913	0.02	0.985204	0.25701	184.085	124.7	2.1
M184T140	921452	659524	64.32	273488	175257	127.5	3.37	1.75	0.0029526	2.53	0.0361958	1.82048	184.086	140.1	2.3
M184T191	1.27338e+06	1.44102e+06	48.9	623409	330464	79.2	2.04	1.03	0.0281274	1.55	0.141969	1.26385	184.085	191.4	3.2
M184T203	2.96371e+06	2.91806e+06	60.73	4618955	4.77778e+06	9.88	0.64	-0.64	0.0829837	1.08	0.275972	1.41703	183.996	203	3.4
M184T291	1.72661e+06	1.76557e+06	25.35	2.9273e+06	3.00068e+06	21.83	0.59	-0.76	0.0018648	2.73	0.0275628	1.86547	184.06	291.4	4.9
M184T346	950778	910620	36.16	1.66784e+06	1.685e+06	23	0.57	-0.81	0.0029526	2.53	0.0361958	1.85002	184.108	346.3	5.8
M184T356	6.91419e+06	7.62126e+06	42.11	7.26189e+06	8.48102e+06	50.31	0.95	-0.07	0.95913	0.02	0.985204	0.130547	184.097	356.4	5.9
M184T362	1.05215e+07	9.07632e+06	39.31	2.51841e+06	2.97204e+06	48.91	4.18	2.06	0.0001554	3.81	0.00610078	2.04114	184.17	362.4	6
M184T380	1.15552e+06	1.13843e+06	12.41	999049	965867	17.82	1.16	0.21	0.0829837	1.08	0.275972	1.18701	184.06	380.2	6.3
M184T416	427747	435474	37.29	233716	222444	56.92	1.83	0.87	0.0206682	1.68	0.117429	1.18678	184.17	416.4	6.9
M184T465	2.75379e+06	2.68576e+06	39	609308	503750	71.65	4.52	2.18	0.0003108	3.51	0.00894927	2.11375	184.06	465	7.8
M184T538	108093	113143	62.57	118609	80799.5	87.32	0.91	-0.13	0.878477	0.06	0.952443	0.0511138	184.197	538.2	9
M184T540	827141	664053	83.65	2.00415e+06	1.3673e+06	107.09	0.41	-1.28	0.160528	0.79	0.408129	1.22211	184.133	540.1	9
M184T606	862870	796889	24.92	639951	635969	38.11	1.35	0.43	0.0649573	1.19	0.238167	1.09112	184.206	605.8	10.1
M184T644	2.16858e+06	2.0162e+06	49.8	514335	446230	70.43	4.22	2.08	0.0010878	2.96	0.0203124	1.82087	184.133	643.8	10.7
M184T72	1.12836e+06	1.30157e+06	39.75	521682	310729	77.05	2.16	1.11	0.0104118	1.98	0.0771942	1.44545	183.963	71.7	1.2
M184T777	2092437	1.95183e+06	41.76	805242	818305	46.29	2.6	1.38	0.0010878	2.96	0.0203124	1.8341	184.17	777.4	13
M184T807	1.50094e+07	1.52733e+07	31.05	1.87622e+07	1.74849e+07	69.79	0.8	-0.32	0.573737	0.24	0.794466	0.00198655	184.112	807.4	13.5
M184T808	849475	837685	42.21	702497	617337	49.7	1.21	0.27	0.278632	0.55	0.551712	0.642734	184.133	808.1	13.5
M184T811	3.54446e+06	3.5562e+06	37.15	2.92026e+06	2.92543e+06	37.66	1.21	0.28	0.441803	0.35	0.702485	0.600802	184.084	811	13.5
M184T824	2.51021e+07	2.29156e+07	46.18	1.17515e+07	9.13279e+06	77.58	2.14	1.09	0.0281274	1.55	0.141969	1.44458	184.075	823.5	13.7
M184T92	324025	327469	21.48	388156	377418	24.17	0.83	-0.26	0.278632	0.55	0.551712	0.918575	184.044	91.8	1.5
M185T100	8.08062e+06	8.20058e+06	34.47	5.11416e+06	3.66388e+06	85.99	1.58	0.66	0.0829837	1.08	0.275972	1.24096	185.129	100.2	1.7
M185T102	630155	625375	36.03	362595	335538	22.33	1.74	0.8	0.0206682	1.68	0.117429	1.52698	184.956	102	1.7
M185T110	1.75943e+06	1.88974e+06	43.58	1.83636e+06	1.77782e+06	36.84	0.96	-0.06	0.95913	0.02	0.985204	0.385105	184.577	110.5	1.8
M185T111	4.76065e+06	4.54563e+06	25.88	3.27486e+06	3.51388e+06	33.06	1.45	0.54	0.0379176	1.42	0.171246	1.23352	185.092	110.8	1.8
M185T129	8.84472e+06	5.7532e+06	91.39	1.21519e+07	1.17944e+07	59.14	0.73	-0.46	0.194872	0.71	0.457172	0.893279	184.992	128.5	2.1
M185T179	3.9495e+07	3.45447e+07	42.05	3.27839e+07	3.19847e+07	18.89	1.2	0.27	0.878477	0.06	0.952443	0.499214	184.993	179	3
M185T226	4.99283e+06	4.94019e+06	32.73	5.88044e+06	6.91061e+06	33.33	0.85	-0.24	0.278632	0.55	0.551712	0.577827	184.993	225.8	3.8
M185T257	2.42758e+06	2.37271e+06	13.97	2.2593e+06	2.30167e+06	16.45	1.07	0.1	0.505361	0.3	0.749981	0.605911	184.992	257.3	4.3
M185T356	712479	651967	62.23	276456	123217	93.61	2.58	1.37	0.0281274	1.55	0.141969	1.56366	185.1	356.5	5.9
M185T362	1.19307e+06	805694	113.97	678045	663050	53.44	1.76	0.82	0.382284	0.42	0.64771	0.626541	185.173	362.4	6
M185T372	1.70981e+06	1.79282e+06	35.32	438985	448019	27.73	3.89	1.96	0.0001554	3.81	0.00610078	2.20597	185.129	371.8	6.2
M185T391	362353	378845	24.74	410345	397990	10.53	0.88	-0.18	0.328205	0.48	0.600385	0.786037	184.618	391.4	6.5
M185T429	81433.5	62631.7	83.02	133713	89920.6	87.93	0.61	-0.72	0.194872	0.71	0.457172	0.976371	185.068	429	7.2
M185T575	1.22034e+06	1.15464e+06	23.24	1.38044e+06	977916	100.27	0.88	-0.18	0.441803	0.35	0.702485	0.539165	185.115	574.6	9.6
M185T624	758746	698488	66.47	820621	883965	32.34	0.92	-0.11	0.441803	0.35	0.702485	0.516846	185.117	623.7	10.4
M185T709	1.14818e+06	1.37007e+06	34.4	848344	846290	32.32	1.35	0.44	0.278632	0.55	0.551712	0.95463	185.165	709.3	11.8
M185T72	2.3949e+06	2.51084e+06	45.52	2.27095e+06	2.63856e+06	40.62	1.05	0.08	1	0	1	0.114644	184.961	71.6	1.2
M185T774	3.25125e+07	2.91571e+07	33.29	2.50922e+07	2.34768e+07	43.97	1.3	0.37	0.234499	0.63	0.504207	0.93084	184.988	774	12.9
M185T78	1.15186e+07	1.06025e+07	63.98	1.0876e+07	1.10559e+07	26.44	1.06	0.08	0.95913	0.02	0.985204	0.302237	185.07	78	1.3
M185T79	3.74805e+06	3.85898e+06	10.46	3.68725e+06	3.68773e+06	7.17	1.02	0.02	0.720901	0.14	0.878065	0.179086	185.115	78.6	1.3
M185T803	1.61119e+08	1.49772e+08	43.6	1.81576e+08	1.13482e+08	95.47	0.89	-0.17	0.573737	0.24	0.794466	0.164599	184.986	803.2	13.4
M185T808	1.8594e+06	1.8139e+06	53.56	1.7086e+06	1.33731e+06	86.51	1.09	0.12	0.441803	0.35	0.702485	0.473037	185.116	807.6	13.5
M185T84	2.2566e+07	2.02154e+07	55.39	1.51694e+07	1.56639e+07	38.01	1.49	0.57	0.194872	0.71	0.457172	0.756416	185.032	83.7	1.4
M185T85	3.22665e+07	3.0841e+07	18.72	3.51331e+07	3.49168e+07	9.37	0.92	-0.12	0.234499	0.63	0.504207	0.807919	185.077	85	1.4
M186T102	8.85388e+06	8.93922e+06	14.41	1.0499e+07	1.08302e+07	28.94	0.84	-0.25	0.160528	0.79	0.408129	0.594791	186.106	102	1.7
M186T120	2.17157e+08	1.93617e+08	73.22	2.44348e+08	1.43786e+08	91.67	0.89	-0.17	0.95913	0.02	0.985204	0.0170785	186.087	120.1	2
M186T203	1.51532e+06	1.63235e+06	23.95	1.70002e+06	1.67973e+06	20.94	0.89	-0.17	0.328205	0.48	0.600385	0.632682	185.992	203	3.4
M186T364	1.90614e+07	1.86177e+07	45.42	1.10744e+07	1.10148e+07	34.61	1.72	0.78	0.0206682	1.68	0.117429	1.2143	186.076	364.3	6.1
M186T369	1.78705e+06	1.64399e+06	44.83	758078	703785	36.74	2.36	1.24	0.0018648	2.73	0.0275628	1.84853	186.185	369	6.2
M186T468	629246	494722	78.39	131871	74423.9	138.79	4.77	2.25	0.0029526	2.53	0.0361958	1.80153	186.149	468.2	7.8
M186T503	2.31277e+06	1.98388e+06	59.86	2.41246e+06	1.67992e+06	65.87	0.96	-0.06	0.95913	0.02	0.985204	0.00945282	186.112	502.6	8.4
M186T513	3.66613e+06	3.65674e+06	21.59	4.14372e+06	4.18684e+06	15.43	0.88	-0.18	0.194872	0.71	0.457172	0.851737	186.112	513.4	8.6
M186T519	3.96701e+06	2.1397e+06	143.42	2.05048e+06	2.03635e+06	28.32	1.93	0.95	0.720901	0.14	0.878065	0.419367	186.058	518.9	8.6
M186T538	2.57689e+06	2.23207e+06	46.45	2.76883e+06	2.42964e+06	36.74	0.93	-0.1	0.720901	0.14	0.878065	0.346888	186.058	538.3	9
M186T548	699946	753951	30.77	602110	670335	43.81	1.16	0.22	0.573737	0.24	0.794466	0.487113	186.149	548.1	9.1
M186T585	1.89766e+06	1.93574e+06	36.18	1.61438e+06	1.82928e+06	33.78	1.18	0.23	0.441803	0.35	0.702485	0.560089	186.149	584.6	9.7
M186T614	6.85578e+07	7.19641e+07	49.14	5.23817e+07	5.06695e+07	44.41	1.31	0.39	0.328205	0.48	0.600385	0.577402	186.222	614.4	10.2
M186T621	2.20331e+06	1.95938e+06	57.45	1.8884e+06	1.88611e+06	42.09	1.17	0.22	0.798446	0.1	0.918313	0.240788	186.149	620.6	10.3
M186T635	1.66206e+06	1.87567e+06	31.49	1.42314e+06	1.54063e+06	22.48	1.17	0.22	0.234499	0.63	0.504207	0.520384	186.149	634.9	10.6
M186T645	1.38225e+06	1.38952e+06	30.63	1.21329e+06	1.13246e+06	43.63	1.14	0.19	0.441803	0.35	0.702485	0.598513	186.149	644.6	10.7
M186T72	1.24775e+06	1.11763e+06	47.9	1.42588e+06	1.26502e+06	65.11	0.88	-0.19	0.95913	0.02	0.985204	0.0831599	185.984	72.3	1.2
M186T734	331247	276948	66.48	262532	243878	45.37	1.26	0.34	0.95913	0.02	0.985204	0.368067	186.092	733.6	12.2
M186T750	1.26753e+07	1.20137e+07	51.25	6.61366e+06	5.74391e+06	43.49	1.92	0.94	0.0281274	1.55	0.141969	1.4493	186.222	750.1	12.5
M186T757	1.3067e+06	1.22671e+06	38.33	1.89548e+06	1.69727e+06	47.6	0.69	-0.54	0.278632	0.55	0.551712	0.939931	185.985	757.1	12.6
M186T809	4.05167e+06	3.9296e+06	37.57	4.09407e+06	4.27028e+06	52.65	0.99	-0.02	0.720901	0.14	0.878065	0.20354	185.987	808.7	13.5
M186T812	2.3236e+06	2.18702e+06	43.67	2.86186e+06	2.28316e+06	58.07	0.81	-0.3	0.720901	0.14	0.878065	0.469706	186.185	811.9	13.5
M186T815	2.25313e+07	2.34783e+07	60.91	1.72449e+07	1.73717e+07	52.75	1.31	0.39	0.720901	0.14	0.878065	0.287378	186.221	814.6	13.6
M186T83_1	4.56302e+07	4.30024e+07	18.57	4.06901e+07	4.02753e+07	25.89	1.12	0.17	0.573737	0.24	0.794466	0.74143	185.96	83.4	1.4
M186T91	1.20706e+06	1.17065e+06	22.44	1.26849e+06	1.31477e+06	15.85	0.95	-0.07	0.720901	0.14	0.878065	0.416723	186.054	90.9	1.5
M186T98	1.8634e+07	1.89828e+07	21.97	2.09925e+07	2.24414e+07	29.57	0.89	-0.17	0.328205	0.48	0.600385	0.401504	186.076	98.1	1.6
M187T112	2.32142e+07	1.59994e+07	87.26	6.54904e+06	3.72976e+06	109.52	3.54	1.83	0.0206682	1.68	0.117429	1.6301	187.108	112.5	1.9
M187T120	1.75689e+07	1.14206e+07	93.58	1.09774e+07	9.36259e+06	75.83	1.6	0.68	0.645377	0.19	0.837808	0.59548	187.091	120	2
M187T325	1.54671e+06	1.54118e+06	42.82	1.52117e+06	1.44828e+06	19.14	1.02	0.02	0.95913	0.02	0.985204	0.236193	187.144	325.5	5.4
M187T35	2.65382e+07	2.61859e+07	18.28	2.64212e+07	2.89697e+07	35.52	1	0.01	0.720901	0.14	0.878065	0.251458	186.955	34.8	0.6
M187T364	724804	661814	68.27	750922	857449	37.16	0.97	-0.05	0.95913	0.02	0.985204	0.290206	187.079	364.4	6.1
M187T523	1.3193e+06	1.3576e+06	26.07	1.23857e+06	1.19037e+06	31.87	1.07	0.09	0.720901	0.14	0.878065	0.309832	187.097	522.8	8.7
M187T548	1.26421e+06	1.33668e+06	25.03	863007	974310	46.72	1.46	0.55	0.0206682	1.68	0.117429	1.20079	187.097	548.3	9.1
M187T580	1.30103e+06	1.36764e+06	22.13	1.13447e+06	1.20751e+06	29.88	1.15	0.2	0.278632	0.55	0.551712	0.676408	187.144	579.5	9.7
M187T614	1.09736e+07	1.27335e+07	46.05	7.52867e+06	7.76717e+06	38.4	1.46	0.54	0.194872	0.71	0.457172	0.75298	187.225	614.4	10.2
M187T62	2.7146e+07	2.84873e+07	28.79	2.7111e+07	2.9515e+07	30.9	1	0	0.95913	0.02	0.985204	0.190623	186.955	62.3	1
M187T65	3.639e+06	3.63465e+06	8.71	3124912	3.07107e+06	7.67	1.16	0.22	0.0029526	2.53	0.0361958	1.75429	187.126	65.1	1.1
M187T671	705742	674624	66.02	430983	472919	56.13	1.64	0.71	0.130381	0.88	0.362517	0.850136	187.157	671.3	11.2
M187T79	542849	519177	25.65	542022	537833	14.74	1	0	0.645377	0.19	0.837808	0.067118	187.07	78.5	1.3
M187T91	6.56576e+06	5.59647e+06	56.56	5.69217e+06	5.72378e+06	27.48	1.15	0.21	0.878477	0.06	0.952443	0.324686	187	90.6	1.5
M188T101	1.20929e+06	1.03594e+06	56.98	1.51788e+06	797505	83.55	0.8	-0.33	0.95913	0.02	0.985204	0.0544466	188.128	100.8	1.7
M188T103	231699	131750	91.14	291033	298928	77.33	0.8	-0.33	1	0	1	0.189004	187.611	103.3	1.7
M188T105	5.44421e+06	4.41168e+06	55.44	4.76508e+06	4.00254e+06	45.55	1.14	0.19	0.645377	0.19	0.837808	0.309294	188.091	105.1	1.8
M188T113	1.31538e+06	1.3335e+06	3.7	1.31793e+06	1.29293e+06	5.09	1	0	1	0	1	0.00794252	188.111	112.6	1.9
M188T137	4.25636e+06	3.20907e+06	40.78	5.28418e+06	6.42497e+06	43.86	0.81	-0.31	0.382284	0.42	0.64771	0.38871	187.991	136.7	2.3
M188T139	970915	868415	50.85	718975	514477	70.9	1.35	0.43	0.130381	0.88	0.362517	0.826452	188.037	138.5	2.3
M188T312	7.69876e+06	7.64321e+06	22.28	6.22268e+06	6.48197e+06	12.06	1.24	0.31	0.0829837	1.08	0.275972	1.26146	188.128	312.4	5.2
M188T332	568265	551513	57.57	257858	256256	4.37	2.2	1.14	0.0649573	1.19	0.238167	1.46859	188.165	332.5	5.5
M188T397	5.76812e+08	5.23971e+08	39.62	8.398e+08	8.66169e+08	29.32	0.69	-0.54	0.0498834	1.3	0.201689	1.22474	188.071	397.2	6.6
M188T458	457814	446604	14.94	505734	505879	19.48	0.91	-0.14	0.441803	0.35	0.702485	0.722812	188.074	458.2	7.6
M188T485	5.07715e+06	5.10328e+06	20.82	8.92144e+06	6.5463e+06	92.09	0.57	-0.81	0.0649573	1.19	0.238167	0.987848	188.128	484.9	8.1
M188T514	124758	131030	31.72	115994	120919	23.04	1.08	0.11	0.878477	0.06	0.952443	0.200472	188.074	514.2	8.6
M188T549	937421	823627	53.37	515780	387040	57.7	1.82	0.86	0.0206682	1.68	0.117429	1.28349	188.164	549	9.2
M188T585	1.45665e+06	950426	103.38	254686	195372	81.32	5.72	2.52	0.014763	1.83	0.0952789	1.51958	188.165	584.7	9.7
M188T614	606123	583849	38.77	643147	611747	24.13	0.94	-0.09	0.720901	0.14	0.878065	0.367788	188.228	614.5	10.2
M188T76	149667	159514	57.5	1.90562e+06	1.1401e+06	134.16	0.08	-3.67	0.0001554	3.81	0.00610078	2.12254	188.176	75.9	1.3
M188T803	1.20412e+07	1.23869e+07	18.16	8.95597e+06	1.07669e+07	45.61	1.34	0.43	0.194872	0.71	0.457172	1.14576	188	802.9	13.4
M188T83_2	3.3475e+06	3.09555e+06	29.13	3.55524e+06	3.18119e+06	32.95	0.94	-0.09	0.645377	0.19	0.837808	0.26913	188.176	82.9	1.4
M188T92	841695	818735	9.95	790741	920625	34.19	1.06	0.09	0.645377	0.19	0.837808	0.54095	188.115	91.7	1.5
M189T103	2.33667e+06	2.33384e+06	3.58	2.37732e+06	2.36814e+06	3.56	0.98	-0.02	0.573737	0.24	0.794466	0.611456	189.123	102.7	1.7
M189T114	297977	262910	36.75	597942	533222	31.86	0.5	-1	0.0001554	3.81	0.00610078	1.93941	188.948	114.4	1.9
M189T120	6.62183e+06	6.19932e+06	27.06	3.11278e+06	3.11592e+06	26.35	2.13	1.09	0.0001554	3.81	0.00610078	2.11126	189.123	120.4	2
M189T125	2.03524e+07	1.8477e+07	16.96	1.80197e+07	1.74126e+07	12.43	1.13	0.18	0.0281274	1.55	0.141969	1.03428	188.987	125.2	2.1
M189T137	5.40047e+07	3.79035e+07	87.95	3.7668e+07	4.03718e+07	56.66	1.43	0.52	0.798446	0.1	0.918313	0.141246	188.987	137.1	2.3
M189T311	547416	546762	10.09	495549	512259	23.7	1.1	0.14	0.441803	0.35	0.702485	0.765122	189.132	310.9	5.2
M189T366	3.90443e+06	4.05125e+06	43.38	3.3783e+06	3.53956e+06	30.25	1.16	0.21	0.328205	0.48	0.600385	0.230789	189.123	366.3	6.1
M189T397	7.10059e+07	6.7111e+07	27.95	3.4387e+07	3.86893e+07	55.6	2.06	1.05	0.0029526	2.53	0.0361958	1.19589	189.074	397.2	6.6
M189T485	425770	484089	31.18	459399	452331	18.93	0.93	-0.11	1	0	1	0.440656	189.131	484.9	8.1
M189T62	16635876	1.45364e+07	31.95	1.53343e+07	1.39693e+07	25.09	1.08	0.12	0.798446	0.1	0.918313	0.322706	188.997	62	1
M189T665	794826	705557	43.39	629232	578213	41.25	1.26	0.34	0.441803	0.35	0.702485	0.681668	189.091	664.9	11.1
M189T749	638397	627398	32.99	715935	719064	30.09	0.89	-0.17	0.645377	0.19	0.837808	0.530487	189.164	748.7	12.5
M189T82	1.10057e+08	1.0511e+08	18.45	8.38196e+07	8.48207e+07	10.83	1.31	0.39	0.004662	2.33	0.0475536	1.77558	189.16	81.7	1.4
M189T85	4.42766e+06	3.50473e+06	55.97	4.29558e+06	2.27884e+06	78.81	1.03	0.04	0.441803	0.35	0.702485	0.437027	189.135	84.6	1.4
M190T105	416618	418352	16.05	425150	419972	19.83	0.98	-0.03	1	0	1	0.104782	190.015	105	1.8
M190T106_1	634571	617794	19.64	453122	475546	34.07	1.4	0.49	0.0281274	1.55	0.141969	1.41218	190.082	105.6	1.8
M190T106_2	1.4238e+07	1.41646e+07	13.29	3.39078e+07	3.49351e+07	21.04	0.42	-1.25	0.0001554	3.81	0.00610078	2.28005	190.144	106.2	1.8
M190T116	4.64258e+07	4.34643e+07	30.35	1.08123e+07	7.53545e+06	65.24	4.29	2.1	0.0001554	3.81	0.00610078	2.19709	190.107	116	1.9
M190T137	1.91931e+06	1.40515e+06	52.78	1.78225e+06	1.76391e+06	42.49	1.08	0.11	0.720901	0.14	0.878065	0.161583	189.987	137.1	2.3
M190T261	2.0583e+06	2.09363e+06	14.1	1.12426e+06	963206	47.24	1.83	0.87	0.0029526	2.53	0.0361958	1.91207	190.033	260.6	4.3
M190T315	1.1689e+06	1.24787e+06	22.27	1.06321e+06	1.08391e+06	52.56	1.1	0.14	0.720901	0.14	0.878065	0.598357	190.053	314.6	5.2
M190T366	412565	474133	56.45	377069	418206	40.59	1.09	0.13	0.645377	0.19	0.837808	0.0741667	190.127	366.4	6.1
M190T426	844182	752538	29.59	1.16129e+06	1.49008e+06	48.71	0.73	-0.46	0.382284	0.42	0.64771	0.54572	190.053	426.4	7.1
M190T441	2.96878e+06	2.84108e+06	69.62	2277511	1.17277e+06	94.48	1.3	0.38	0.645377	0.19	0.837808	0.443944	190.107	441	7.3
M190T454	247271	245483	14.78	181568	196046	18.59	1.36	0.45	0.0029526	2.53	0.0361958	1.75757	190.097	454.4	7.6
M190T517	432843	392942	41.98	449319	312321	55.02	0.96	-0.05	0.878477	0.06	0.952443	0.111509	189.671	516.5	8.6
M190T565	1.34815e+07	1.16657e+07	33.93	8.65683e+06	6.17911e+06	69.36	1.56	0.64	0.130381	0.88	0.362517	1.28384	190.034	565.1	9.4
M190T566	1.42039e+06	1.37581e+06	54.16	571794	595163	66.47	2.48	1.31	0.0379176	1.42	0.171246	1.45242	190.071	565.6	9.4
M190T63	7.72054e+06	7.45312e+06	61.43	5.12572e+06	3.30571e+06	84.16	1.51	0.59	0.194872	0.71	0.457172	0.531986	189.999	63	1
M190T651	381817	350882	31.83	327697	339488	35.86	1.17	0.22	0.798446	0.1	0.918313	0.663469	190.086	651.2	10.9
M190T701	1.97512e+06	1.82913e+06	33.19	2.5904e+06	2.50758e+06	26.68	0.76	-0.39	0.194872	0.71	0.457172	1.0497	190.126	700.6	11.7
M190T87	2.13657e+06	2.50611e+06	50.07	2.49051e+06	2.84528e+06	54.91	0.86	-0.22	0.505361	0.3	0.749981	0.307659	190.071	87.3	1.5
M190T99	4.02522e+06	4.01764e+06	19.11	3.46285e+06	3.50863e+06	12.99	1.16	0.22	0.234499	0.63	0.504207	1.04047	190.119	98.5	1.6
M191T100	805737	794348	46.32	811423	957123	52.4	0.99	-0.01	0.645377	0.19	0.837808	0.186623	191.103	100	1.7
M191T113	1.82887e+07	1.58357e+07	60.91	2.04395e+07	1.52793e+07	74.52	0.89	-0.16	0.878477	0.06	0.952443	0.116017	191.049	113.3	1.9
M191T114	1.38813e+06	1.17292e+06	50.85	1.49472e+06	1.57887e+06	36.28	0.93	-0.11	0.645377	0.19	0.837808	0.160909	190.986	114.3	1.9
M191T116	4.12579e+06	3.58905e+06	34.69	4.91646e+06	4.84585e+06	24.77	0.84	-0.25	0.234499	0.63	0.504207	0.855505	191.111	116	1.9
M191T133	109251	107553	38.02	134310	148518	33.13	0.81	-0.3	0.194872	0.71	0.457172	0.767825	191.055	132.9	2.2
M191T137	1.31373e+07	1.39983e+07	16.93	1.27964e+07	1.32637e+07	17.94	1.03	0.04	1	0	1	0.144911	190.982	137.1	2.3
M191T316	1.6923e+07	1.74081e+07	15.33	1.93206e+07	1.89089e+07	17.95	0.88	-0.19	0.328205	0.48	0.600385	0.940508	190.99	315.7	5.3
M191T323	2.0928e+07	1.99858e+07	88.82	3.75923e+07	3.19556e+07	33.94	0.56	-0.85	0.0498834	1.3	0.201689	1.23509	190.996	323.1	5.4
M191T342	1.4807e+07	1.49139e+07	12.46	1.34683e+07	1.3474e+07	14.81	1.1	0.14	0.234499	0.63	0.504207	0.80825	190.994	342.2	5.7
M191T351	4.24819e+07	3.98185e+07	58.79	2.41223e+07	2.03554e+07	54.45	1.76	0.82	0.234499	0.63	0.504207	1.01816	190.991	351.4	5.9
M191T363	4.68884e+07	3.14142e+07	73.47	3.00232e+07	1.70652e+07	84.26	1.56	0.64	0.130381	0.88	0.362517	0.869944	190.994	362.7	6
M191T404	3.50278e+07	2.90126e+07	41.23	5.67293e+07	4.3747e+07	60.35	0.62	-0.7	0.104895	0.98	0.317905	1.14071	190.993	403.7	6.7
M191T466	229317	221097	13.73	223993	220646	24.1	1.02	0.03	0.798446	0.1	0.918313	0.290916	191.085	466.2	7.8
M191T472	1.36455e+07	1.40255e+07	42.16	1.43819e+07	1.52218e+07	51.42	0.95	-0.08	0.95913	0.02	0.985204	0.0488039	190.99	471.8	7.9
M191T504	2.1518e+07	7.13449e+06	102.87	5.66423e+07	3.92017e+07	131.25	0.38	-1.4	0.104895	0.98	0.317905	1.10222	190.997	504.3	8.4
M191T539	1.49203e+07	1.40171e+07	21.31	1.34918e+07	1.4473e+07	28.44	1.11	0.15	0.645377	0.19	0.837808	0.627835	190.991	538.9	9
M191T558	9.66773e+06	8.82355e+06	47.41	1.347e+07	1.43235e+07	50.76	0.72	-0.48	0.234499	0.63	0.504207	0.533465	190.996	558.3	9.3
M191T565_3	1.31832e+06	1.26031e+06	37.32	1.1874e+06	1.14432e+06	39.32	1.11	0.15	0.720901	0.14	0.878065	0.324483	191.053	565.1	9.4
M191T575	3.12554e+07	2.69373e+07	40.39	2.10321e+07	2.09956e+07	34.17	1.49	0.57	0.0649573	1.19	0.238167	1.21711	190.99	574.7	9.6
M191T62	9.06375e+07	8.85514e+07	8.38	7.87388e+07	7.96283e+07	7.24	1.15	0.2	0.0003108	3.51	0.00894927	1.76046	190.992	62	1
M191T633	1.95459e+07	1.90117e+07	36.16	1.17564e+07	1.13237e+07	47.92	1.66	0.73	0.0379176	1.42	0.171246	1.33347	190.996	633.3	10.6
M191T654	5.69471e+06	6.19519e+06	26.05	6.72078e+06	6.71996e+06	13.65	0.85	-0.24	0.160528	0.79	0.408129	1.00004	190.99	653.9	10.9
M191T671	3.79886e+06	3.3758e+06	42.07	4.20094e+06	3.69733e+06	49.66	0.9	-0.15	0.645377	0.19	0.837808	0.12337	190.99	671	11.2
M191T690	1.17174e+07	1.07997e+07	42.47	6.5393e+06	6.01623e+06	35.37	1.79	0.84	0.0206682	1.68	0.117429	1.50766	190.996	689.6	11.5
M191T704	3.1645e+06	3.29527e+06	30.57	2.74077e+06	2.49091e+06	48.53	1.15	0.21	0.645377	0.19	0.837808	0.585782	190.989	703.6	11.7
M191T73	3.97361e+06	4011170	43.69	3.57307e+06	3.2208e+06	69.7	1.11	0.15	0.573737	0.24	0.794466	0.476995	190.979	72.9	1.2
M191T81	1.07114e+08	9.30193e+07	32.46	1.13434e+08	1.07268e+08	22.14	0.94	-0.08	0.328205	0.48	0.600385	0.445459	190.912	80.7	1.3
M191T810_1	3.73747e+07	3.5424e+07	35.78	3.60956e+07	3.48167e+07	30.98	1.04	0.05	1	0	1	0.0811723	191.143	810.2	13.5
M191T810_2	1.427e+06	1.38057e+06	16.37	983204	1.07904e+06	35.06	1.45	0.54	0.004662	2.33	0.0475536	1.34878	191.179	810.4	13.5
M191T88	2.27718e+06	2.20219e+06	14.28	2.66795e+06	2.61204e+06	25.71	0.85	-0.23	0.130381	0.88	0.362517	0.849214	191.066	88.3	1.5
M191T92	2.5517e+06	2.52932e+06	6.9	2.49093e+06	2.5072e+06	4.39	1.02	0.03	0.573737	0.24	0.794466	0.532413	191.102	92.1	1.5
M192T105	6.44167e+06	4.96393e+06	73.23	1.66586e+06	1.67348e+06	31.61	3.87	1.95	0.0001554	3.81	0.00610078	2.08475	192.056	104.5	1.7
M192T114	3.26272e+06	3.76399e+06	40.49	3.20058e+06	3.43863e+06	70.68	1.02	0.03	0.720901	0.14	0.878065	0.229655	192.033	113.5	1.9
M192T334	1.69991e+06	1.67534e+06	70.29	3.21122e+06	3.35856e+06	37.66	0.53	-0.92	0.0498834	1.3	0.201689	1.16106	192.066	333.8	5.6
M192T363	4.12409e+06	2.04589e+06	107.47	1.53177e+07	1.8811e+07	61.77	0.27	-1.89	0.0379176	1.42	0.171246	1.0397	192.138	363.2	6.1
M192T378	1.57568e+06	1.87528e+06	61.15	433270	254567	149.75	3.64	1.86	0.0379176	1.42	0.171246	1.52691	192.033	377.6	6.3
M192T384	360760	131877	111.54	629366	448802	121.58	0.57	-0.8	0.645377	0.19	0.837808	0.623201	192.077	384.1	6.4
M192T418	2.05433e+07	2.37703e+07	52	997640	554754	79.88	20.59	4.36	0.0001554	3.81	0.00610078	2.25831	192.068	417.9	7
M192T439	306988	313629	46.69	182540	228113	60.94	1.68	0.75	0.0649573	1.19	0.238167	1.07293	191.626	438.5	7.3
M192T440	3.46368e+06	3.05604e+06	39.24	4.91159e+06	4.29325e+06	46.49	0.71	-0.5	0.194872	0.71	0.457172	0.976634	192.106	440.5	7.3
M192T536	1.0972e+06	865723	70.02	974205	1.20158e+06	63.07	1.13	0.17	0.720901	0.14	0.878065	0.338356	192.102	536	8.9
M192T62	1.95828e+06	2.02519e+06	16.98	2.12011e+06	2.12242e+06	12.99	0.92	-0.11	0.382284	0.42	0.64771	0.670436	191.992	62.4	1
M192T746	4.38965e+06	4.44964e+06	20.65	4.74712e+06	4.7549e+06	10.52	0.92	-0.11	0.573737	0.24	0.794466	0.661126	192.138	746.4	12.4
M192T78	5.62226e+06	6.26871e+06	34.56	3.03472e+06	2.38196e+06	53.97	1.85	0.89	0.00699301	2.16	0.0602244	1.56788	192.08	77.9	1.3
M192T81	2.47933e+06	2.54933e+06	31.17	1.96456e+06	2.06202e+06	21.04	1.26	0.34	0.194872	0.71	0.457172	0.957865	191.916	80.7	1.3
M192T810	3.46069e+06	3.10716e+06	38.43	3.11659e+06	2.84302e+06	33.69	1.11	0.15	0.645377	0.19	0.837808	0.33596	192.146	810.2	13.5
M193T105_1	778409	802911	14.67	713643	756527	27.42	1.09	0.13	0.720901	0.14	0.878065	0.525326	192.558	104.5	1.7
M193T105_2	569144	562026	14.38	543718	616929	36.7	1.05	0.07	0.720901	0.14	0.878065	0.495099	193.054	104.5	1.7
M193T113	121956	5297.86	179.88	333948	284850	104.4	0.37	-1.45	0.278632	0.55	0.551712	0.665264	193.044	113	1.9
M193T122	5.13438e+07	4.01429e+07	39.9	1.9957e+07	1.97145e+07	60.68	2.57	1.36	0.0029526	2.53	0.0361958	1.61131	193.067	121.9	2
M193T173	6.01936e+06	6.03801e+06	10.48	3.04927e+06	3.92595e+06	54.73	1.97	0.98	0.0001554	3.81	0.00610078	1.65902	193.068	172.6	2.9
M193T308	1.82272e+06	1.92982e+06	29.12	1.59074e+06	1.39032e+06	37.59	1.15	0.2	0.278632	0.55	0.551712	0.53882	192.982	308.5	5.1
M193T390	207046	206545	10.16	197447	202387	19.5	1.05	0.07	0.645377	0.19	0.837808	0.429535	193.083	390	6.5
M193T406	821473	311608	104.07	468333	233253	102.88	1.75	0.81	0.573737	0.24	0.794466	0.439683	193.138	406.1	6.8
M193T440	830032	942318	42.91	816215	856086	47.28	1.02	0.02	0.95913	0.02	0.985204	0.083247	193.108	440.4	7.3
M193T461	1.46727e+06	1.52174e+06	25.31	1.25808e+06	1.27019e+06	47.01	1.17	0.22	0.505361	0.3	0.749981	0.690863	193.144	461.3	7.7
M193T551	380256	324342	32.85	587257	491213	42.66	0.65	-0.63	0.0498834	1.3	0.201689	1.34061	193.097	551.2	9.2
M193T630	426469	470202	44.74	297461	270182	65.99	1.43	0.52	0.234499	0.63	0.504207	0.973517	193.133	629.9	10.5
M193T73	2.10477e+06	2.276e+06	49.75	1.83295e+06	1.14029e+06	103.03	1.15	0.2	0.441803	0.35	0.702485	0.596962	192.976	72.9	1.2
M193T744	1.93878e+07	2.04595e+07	12.67	1.985e+07	2.04245e+07	29.81	0.98	-0.03	0.878477	0.06	0.952443	0.00378782	193.159	744.3	12.4
M193T78_2	612950	621210	26.11	621466	495382	45.34	0.99	-0.02	0.720901	0.14	0.878065	0.166682	193.131	78.4	1.3
M193T81	2.45215e+07	2.32349e+07	30.56	2.49921e+07	2.56242e+07	52.85	0.98	-0.03	1	0	1	0.178477	192.91	80.7	1.3
M193T823	6.2194e+06	5.84487e+06	21.32	4.53981e+06	4.18838e+06	60.91	1.37	0.45	0.104895	0.98	0.317905	1.0816	193.122	823.2	13.7
M193T90	1.12017e+07	9.46766e+06	50.24	9.40046e+06	9.76356e+06	21.49	1.19	0.25	0.95913	0.02	0.985204	0.511578	193.154	90.1	1.5
M194T101	1.1328e+06	1.00878e+06	89.55	1.24193e+06	1.50347e+06	59.91	0.91	-0.13	0.505361	0.3	0.749981	0.418668	194.139	100.8	1.7
M194T102	9.77389e+06	1.04909e+07	62.65	5.65124e+06	4.37655e+06	105.54	1.73	0.79	0.194872	0.71	0.457172	0.73158	193.93	102	1.7
M194T106	4.0616e+06	2.5701e+06	79.44	1.56959e+07	1.39338e+07	54.69	0.26	-1.95	0.0018648	2.73	0.0275628	1.90735	194.048	105.6	1.8
M194T114	944167	974737	44.21	8.7289e+06	7.38876e+06	30.31	0.11	-3.21	0.0001554	3.81	0.00610078	2.34	193.994	114.4	1.9
M194T122	5.58808e+06	5.76307e+06	42.02	4372101	5.64467e+06	53.58	1.28	0.35	0.573737	0.24	0.794466	0.381086	193.57	121.9	2
M194T142	3.53331e+07	2.7728e+07	36.3	3.78546e+07	3.56054e+07	15.62	0.93	-0.1	0.278632	0.55	0.551712	0.538944	194.118	141.6	2.4
M194T160	1.01151e+07	9.9042e+06	57.87	2.27975e+07	2.54264e+07	37.22	0.44	-1.17	0.00699301	2.16	0.0602244	1.65378	194.118	160.1	2.7
M194T309	647719	544447	51.47	621107	552009	67.94	1.04	0.06	0.95913	0.02	0.985204	0.450827	193.98	308.6	5.1
M194T313	6.03583e+07	5.72971e+07	34.68	1.87812e+08	1.85688e+08	30.09	0.32	-1.64	0.0001554	3.81	0.00610078	2.18401	194.117	313	5.2
M194T440	350529	334603	48.83	235829	198460	82.09	1.49	0.57	0.328205	0.48	0.600385	0.963841	194.101	440.4	7.3
M194T492	5.15019e+06	4.9998e+06	34.88	6.01858e+06	6.13128e+06	18.25	0.86	-0.22	0.234499	0.63	0.504207	0.805139	194.081	492.3	8.2
M194T744	3.22805e+06	2.69221e+06	71.18	2.25704e+06	2.26378e+06	23.99	1.43	0.52	0.382284	0.42	0.64771	0.759565	194.162	744.2	12.4
M194T768	1.40247e+07	1.3458e+07	25.93	1.06423e+07	1.0392e+07	25.92	1.32	0.4	0.104895	0.98	0.317905	1.23467	194.118	767.8	12.8
M194T82	1.49176e+07	1.42552e+07	57.89	1.64983e+07	1.8042e+07	25.24	0.9	-0.15	0.878477	0.06	0.952443	0.584946	194.032	82.1	1.4
M194T84	3.12923e+06	3.19143e+06	8.24	2.41745e+06	2.39812e+06	15.77	1.29	0.37	0.0029526	2.53	0.0361958	1.87337	194.102	84.4	1.4
M194T98	6.30731e+06	5.91732e+06	34.48	6.87632e+06	6.74009e+06	25.66	0.92	-0.12	0.505361	0.3	0.749981	0.520295	194.048	98.1	1.6
M195T106	439847	471570	54.64	384838	421639	62.93	1.14	0.19	0.505361	0.3	0.749981	0.369042	195.052	105.6	1.8
M195T309	9.69722e+06	1.08503e+07	44.98	9.52126e+06	9.9783e+06	37.58	1.02	0.03	0.798446	0.1	0.918313	0.114045	194.977	308.9	5.1
M195T325	571640	581862	13.46	459654	458319	13.07	1.24	0.31	0.0104118	1.98	0.0771942	1.63795	195.076	325.1	5.4
M195T383	6.119e+06	5.03908e+06	70.5	9.19578e+06	7.34585e+06	71.07	0.67	-0.59	0.382284	0.42	0.64771	0.644555	195.113	383	6.4
M195T437	6.39799e+06	2.98585e+06	142.76	2.63228e+06	2.78802e+06	19.24	2.43	1.28	0.278632	0.55	0.551712	0.926064	195.088	436.9	7.3
M195T461	2.34543e+06	2.40112e+06	53.05	388603	290128	75.73	6.04	2.59	0.000621601	3.21	0.0140919	2.08372	195.113	460.5	7.7
M195T569	729472	733037	48.04	408810	434226	53.16	1.78	0.84	0.0649573	1.19	0.238167	1.10859	194.662	569.3	9.5
M195T609	289604	270192	54.9	681154	545176	79.86	0.43	-1.23	0.0649573	1.19	0.238167	1.16805	195.092	609.4	10.2
M195T68	419192	393692	24.91	346230	342987	32.71	1.21	0.28	0.234499	0.63	0.504207	0.915616	195.129	68.4	1.1
M195T698	5.03304e+06	4.62885e+06	33.95	2.81108e+06	3.09133e+06	57.54	1.79	0.84	0.0206682	1.68	0.117429	1.37945	195.138	698.4	11.6
M195T707	5.21793e+06	5.14865e+06	25.61	4.14016e+06	4.0203e+06	27	1.26	0.33	0.130381	0.88	0.362517	1.11845	195.065	706.7	11.8
M195T72_1	1.047e+06	1.04484e+06	8.31	901692	893966	7.48	1.16	0.22	0.0010878	2.96	0.0203124	1.77379	194.925	71.8	1.2
M195T72_2	2.89714e+06	3.05135e+06	27.33	1.98091e+06	1.83731e+06	18.53	1.46	0.55	0.0379176	1.42	0.171246	1.53211	195.025	71.9	1.2
M195T73	1.93802e+06	1.74077e+06	40.48	2.02498e+06	1.46598e+06	102.47	0.96	-0.06	0.441803	0.35	0.702485	0.455843	194.975	72.9	1.2
M195T730	3.95249e+06	2.66862e+06	114.4	1.20127e+06	1.00293e+06	65.78	3.29	1.72	0.0104118	1.98	0.0771942	1.53907	195.138	729.8	12.2
M195T750	5.55491e+06	5.31843e+06	46.73	4.70709e+06	3.11386e+06	75.12	1.18	0.24	0.645377	0.19	0.837808	0.653757	195.138	749.5	12.5
M195T751	1.12569e+06	805881	81.87	2.70213e+06	2.15054e+06	98.73	0.42	-1.26	0.130381	0.88	0.362517	0.97015	195.174	750.7	12.5
M195T79	1.66454e+06	1.82441e+06	60.74	2.06067e+06	2.05058e+06	9.54	0.81	-0.31	0.878477	0.06	0.952443	0.995683	195.099	79.5	1.3
M195T823	3.00795e+08	3.00599e+08	37	1.76972e+08	1.6698e+08	61.96	1.7	0.77	0.0649573	1.19	0.238167	1.23929	195.102	823.2	13.7
M196T105	4.84024e+07	4.80963e+07	60.17	4.63692e+07	5.45436e+07	61.91	1.04	0.06	0.798446	0.1	0.918313	0.28816	196.064	104.7	1.7
M196T267	3.44447e+06	3451767	69.9	2.27666e+06	1.9077e+06	47.75	1.51	0.6	0.278632	0.55	0.551712	0.246612	196.155	267.2	4.5
M196T302	1.89356e+07	1.42428e+07	75.7	2.06018e+07	2.48815e+07	56.86	0.92	-0.12	0.720901	0.14	0.878065	0.29358	196.155	302.3	5
M196T309	337419	366307	28.29	432500	425950	30.97	0.78	-0.36	0.160528	0.79	0.408129	0.909367	195.977	308.6	5.1
M196T353	5.9049e+06	1.73221e+06	146.92	1.07421e+07	1.02712e+07	97.56	0.55	-0.86	0.505361	0.3	0.749981	0.113231	196.126	353.5	5.9
M196T362	2.50303e+06	1.21384e+06	109.85	1.27722e+06	1.35323e+06	25.63	1.96	0.97	0.95913	0.02	0.985204	0.404037	196.097	362.1	6
M196T387	6.12873e+06	5.95077e+06	38.15	5.26653e+06	5.8132e+06	27.2	1.16	0.22	0.720901	0.14	0.878065	0.406002	196.108	386.7	6.4
M196T402	1.18756e+07	1.08272e+07	67.25	3.72593e+06	3.95872e+06	41.65	3.19	1.67	0.0206682	1.68	0.117429	1.48788	196.133	401.6	6.7
M196T437	167822	157226	43.42	46138.2	45144.7	38.2	3.64	1.86	0.0001554	3.81	0.00610078	2.04566	196.091	436.9	7.3
M196T552	396137	369511	38.55	506439	509539	52.66	0.78	-0.35	0.505361	0.3	0.749981	0.32369	196.061	552.2	9.2
M196T567	427200	366141	50.13	347978	169983	100.06	1.23	0.3	0.130381	0.88	0.362517	0.797058	196.133	566.9	9.4
M196T582	306810	314442	67.05	268062	237091	32.23	1.14	0.19	0.798446	0.1	0.918313	0.195694	196.052	581.8	9.7
M196T668	406552	432535	30.31	138801	81888	85.06	2.93	1.55	0.0010878	2.96	0.0203124	1.90983	196.097	668.3	11.1
M196T707	385624	353551	43.55	369387	370414	48.99	1.04	0.06	0.878477	0.06	0.952443	0.287384	196.069	706.7	11.8
M196T730	320306	219168	59.1	417960	364232	61.92	0.77	-0.38	0.505361	0.3	0.749981	0.46671	196.052	729.6	12.2
M196T823	4.20392e+07	2.83363e+07	74.86	1.90105e+07	1.28063e+07	109.4	2.21	1.14	0.0498834	1.3	0.201689	1.20989	196.105	823.2	13.7
M196T97	3.7111e+06	3.95988e+06	27.46	4.69956e+06	4.78681e+06	20.87	0.79	-0.34	0.0498834	1.3	0.201689	1.18497	196.009	97.2	1.6
M197T102	6.53332e+06	6.79673e+06	29.94	5.18054e+06	5.46832e+06	24.39	1.26	0.33	0.0649573	1.19	0.238167	0.775938	196.933	101.8	1.7
M197T105	2.42432e+06	2.31322e+06	38.78	2.38824e+06	2.14437e+06	33.78	1.02	0.02	0.505361	0.3	0.749981	0.157095	197.067	104.7	1.7
M197T109	5.33709e+06	5.11259e+06	25.48	5.1382e+06	4.99013e+06	14.33	1.04	0.05	1	0	1	0.185159	196.933	108.7	1.8
M197T114_1	1.99964e+06	1.96713e+06	7.27	1.82531e+06	1.80346e+06	10.53	1.1	0.13	0.0498834	1.3	0.201689	1.16661	196.956	114.5	1.9
M197T114_2	3.6131e+06	4.27461e+06	41.95	3.3755e+06	3.73905e+06	71.05	1.07	0.1	0.720901	0.14	0.878065	0.299734	197.096	113.9	1.9
M197T267	553048	436370	61.57	1.09563e+06	1.01126e+06	66.65	0.5	-0.99	0.130381	0.88	0.362517	1.03357	197.158	266.6	4.4
M197T308	690292	654859	32.77	557940	586883	21.91	1.24	0.31	0.441803	0.35	0.702485	0.771022	196.974	308.3	5.1
M197T310	973047	1.00033e+06	16.81	991507	784512	42.46	0.98	-0.03	0.720901	0.14	0.878065	0.17047	197.059	309.5	5.2
M197T323	430987	123814	131.12	843565	736688	68.37	0.51	-0.97	0.130381	0.88	0.362517	1.22979	197.092	322.9	5.4
M197T353	1.49611e+06	1.57587e+06	73.41	2.31697e+06	2.56527e+06	32.7	0.65	-0.63	0.130381	0.88	0.362517	1.14492	197.128	353.3	5.9
M197T387	198188	149989	73.99	147907	88338.4	81.66	1.34	0.42	0.505361	0.3	0.749981	0.637389	197.111	386.7	6.4
M197T402	952271	967998	41.56	1.21141e+06	1.03774e+06	35.54	0.79	-0.35	0.505361	0.3	0.749981	0.83005	197.136	401.9	6.7
M197T412	372423	144001	154.23	394144	96229.2	160.49	0.94	-0.08	0.720901	0.14	0.878065	0.133952	197.056	412.2	6.9
M197T570	690002	722458	16.31	624896	628740	9.16	1.1	0.14	0.160528	0.79	0.408129	0.825269	197.117	570.1	9.5
M197T74	130770	141589	24.05	71390.2	73199.3	42.54	1.83	0.87	0.0010878	2.96	0.0203124	1.59894	196.928	73.6	1.2
M197T742	1.54136e+06	1.68559e+06	34.18	1214901	1.09375e+06	33.27	1.27	0.34	0.194872	0.71	0.457172	0.794163	197.117	742.2	12.4
M197T778	292330	253272	44.86	283853	268187	44.07	1.03	0.04	1	0	1	0.109872	197.117	778.5	13
M197T82_2	2.40146e+07	2.49974e+07	57.11	2.01497e+07	2.04318e+07	40.83	1.19	0.25	0.382284	0.42	0.64771	0.108152	197.101	82.3	1.4
M197T88	1.48419e+06	1.42922e+06	12.67	1.508e+06	1.5408e+06	12.15	0.98	-0.02	0.798446	0.1	0.918313	0.172895	196.961	88.5	1.5
M197T90	2.85955e+06	2.7162e+06	18.78	2.54075e+06	2.64787e+06	24.03	1.13	0.17	0.505361	0.3	0.749981	0.805858	197.059	89.9	1.5
M198T102_1	1.12851e+06	1.20104e+06	29.23	1.48431e+06	1.438e+06	13.52	0.76	-0.4	0.0104118	1.98	0.0771942	1.21003	197.988	102	1.7
M198T105	800854	832192	53.07	1.59868e+06	1.55964e+06	41.46	0.5	-1	0.0104118	1.98	0.0771942	1.35754	198.06	104.6	1.7
M198T108	8.57283e+06	5.74118e+06	76.39	1.01438e+07	9.87543e+06	48.81	0.85	-0.24	0.278632	0.55	0.551712	0.521499	198.043	108.2	1.8
M198T122	5.36895e+06	5.32332e+06	19.47	7.27106e+06	7.22436e+06	11.57	0.74	-0.44	0.0029526	2.53	0.0361958	1.821	198.088	122	2
M198T372	3.28444e+06	3.66106e+06	51.32	2.87316e+06	2.69362e+06	35.15	1.14	0.19	0.720901	0.14	0.878065	0.0594732	198.076	372.5	6.2
M198T526	2.53323e+07	2.5714e+07	29.39	2.44181e+07	2.40566e+07	25.4	1.04	0.05	0.878477	0.06	0.952443	0.0549869	198.128	525.6	8.8
M198T535	1.05513e+06	881891	41.52	980494	1.12268e+06	47.98	1.08	0.11	0.878477	0.06	0.952443	0.397489	198.076	535.1	8.9
M198T536	1.26796e+06	951412	64.38	863781	829202	62.54	1.47	0.55	0.160528	0.79	0.408129	0.81194	198.113	535.5	8.9
M198T592	2.94092e+06	2.92211e+06	27.77	4.56366e+06	5.09297e+06	33.05	0.64	-0.63	0.0829837	1.08	0.275972	1.3177	198.149	592.4	9.9
M198T611	2.57714e+06	1.54206e+06	134.13	6.62095e+06	3.35478e+06	93.09	0.39	-1.36	0.0498834	1.3	0.201689	1.24133	198.149	611.5	10.2
M198T73	1.05906e+06	1.02783e+06	20.48	887013	806861	27.38	1.19	0.26	0.130381	0.88	0.362517	1.01273	197.927	73.5	1.2
M198T807	1.38172e+06	1.23845e+06	32.48	1.35319e+06	1.38232e+06	45.86	1.02	0.03	0.645377	0.19	0.837808	0.273569	198.185	807.2	13.5
M198T90	2.51616e+07	2.4857e+07	50.51	1.86329e+07	2.04967e+07	57.47	1.35	0.43	0.234499	0.63	0.504207	0.598762	198.043	90.5	1.5
M199T108	524719	523967	27.77	302755	353319	51.26	1.73	0.79	0.014763	1.83	0.0952789	1.32494	199.047	108.2	1.8
M199T137	1.44367e+07	1.31425e+07	35.26	1.82671e+07	1.81614e+07	18.46	0.79	-0.34	0.0379176	1.42	0.171246	1.17589	198.971	136.5	2.3
M199T323	1.29977e+06	1.10147e+06	55.57	2.38352e+06	2.26938e+06	41.21	0.55	-0.87	0.0281274	1.55	0.141969	1.41405	199.108	323.2	5.4
M199T395	46038.9	46512.2	71.64	45422.6	11599.3	128.06	1.01	0.02	0.505361	0.3	0.749981	0.783138	199.008	395.4	6.6
M199T396	869588	926489	48.55	801673	664035	53.26	1.08	0.12	0.645377	0.19	0.837808	0.092809	199.157	395.8	6.6
M199T455	665877	704763	27.69	666057	686841	52.57	1	0	1	0	1	0.418081	199.06	454.8	7.6
M199T519	5.23627e+06	5.83201e+06	47.27	4.38954e+06	3.38472e+06	54.8	1.19	0.25	0.720901	0.14	0.878065	0.473246	199.144	519.2	8.7
M199T526	4.11988e+06	4.34326e+06	24.51	3.58085e+06	3.45081e+06	24.79	1.15	0.2	0.278632	0.55	0.551712	0.681863	199.131	525.6	8.8
M199T606	323820	347956	46.33	193517	176927	40.12	1.67	0.74	0.0649573	1.19	0.238167	1.17833	199.123	606	10.1
M199T611	488556	259611	142.37	1.00689e+06	603787	81	0.49	-1.04	0.104895	0.98	0.317905	1.13426	199.153	611.5	10.2
M199T655	154546	140203	49.94	184349	143788	71.08	0.84	-0.25	0.95913	0.02	0.985204	0.0966438	199.188	655.4	10.9
M199T752	2.09686e+06	1.96647e+06	22.11	1.83549e+06	1.69319e+06	30.48	1.14	0.19	0.441803	0.35	0.702485	0.782207	199.132	752.3	12.5
M199T770	1.35083e+07	1.32847e+07	29.07	1.26587e+07	1.18836e+07	58.16	1.07	0.09	0.878477	0.06	0.952443	0.540784	199.169	770.3	12.8
M199T82	9.42943e+06	9.51942e+06	6.83	8.67702e+06	8.71565e+06	13.45	1.09	0.12	0.194872	0.71	0.457172	0.957587	198.876	82.1	1.4
M199T91	682864	680167	7.69	595571	581196	11.97	1.15	0.2	0.0206682	1.68	0.117429	1.47982	199.047	90.8	1.5
M200T113	1.40594e+06	1.37252e+06	22.18	1.42702e+06	1.53023e+06	53.2	0.99	-0.02	0.878477	0.06	0.952443	0.582372	200.091	112.6	1.9
M200T327	8.05449e+06	7.65311e+06	19.47	8.51159e+06	7.49097e+06	34.25	0.95	-0.08	0.720901	0.14	0.878065	0.20661	200.091	327.4	5.5
M200T400_1	1.79597e+06	1.21883e+06	79.02	2.29824e+06	2.54856e+06	32.64	0.78	-0.36	0.278632	0.55	0.551712	0.919675	199.88	399.6	6.7
M200T400_2	4.38913e+09	4.47079e+09	24.53	2.28838e+09	2.60865e+09	40.78	1.92	0.94	0.004662	2.33	0.0475536	1.67646	200.047	399.5	6.7
M200T400_3	2.33196e+06	1.72074e+06	84.25	1.17083e+06	925659	98.54	1.99	0.99	0.0206682	1.68	0.117429	1.26968	200.214	399.6	6.7
M200T426	748528	772746	43.37	654436	725601	44.32	1.14	0.19	0.645377	0.19	0.837808	0.145815	200.165	426.1	7.1
M200T461	143809	124448	32.39	167287	166636	29.54	0.86	-0.22	0.234499	0.63	0.504207	0.669713	200.056	461.5	7.7
M200T519	185263	147828	63.14	272318	208215	64.09	0.68	-0.56	0.328205	0.48	0.600385	0.722274	200.148	519.2	8.7
M200T525	390034	356113	45.81	299878	276647	40.92	1.3	0.38	0.278632	0.55	0.551712	0.728475	200.074	525.4	8.8
M200T526	125458	125124	73.79	178257	186600	59.63	0.7	-0.51	0.278632	0.55	0.551712	0.184741	200.135	525.6	8.8
M200T577	4.39227e+06	4.56572e+06	51.31	4.96335e+06	4.2545e+06	44.61	0.88	-0.18	0.95913	0.02	0.985204	0.408042	200.143	577.2	9.6
M200T582	3.44913e+06	2.05723e+06	93.22	2.33747e+06	2.43925e+06	45.91	1.48	0.56	0.95913	0.02	0.985204	0.0230051	200.047	581.8	9.7
M200T625	433773	453191	16.82	487594	516904	30.66	0.89	-0.17	0.382284	0.42	0.64771	0.390323	200.128	625.1	10.4
M200T64	4.30776e+06	4.22243e+06	61.19	2.69872e+06	1.59531e+06	67.63	1.6	0.67	0.278632	0.55	0.551712	0.932439	200.237	64.2	1.1
M200T648	9.90333e+06	9.22641e+06	36.31	1.78326e+07	1.59356e+07	67.54	0.56	-0.85	0.104895	0.98	0.317905	1.06279	200.165	647.7	10.8
M200T703	1.61949e+06	1.64357e+06	28.76	1.5705e+06	1.61372e+06	43.05	1.03	0.04	0.95913	0.02	0.985204	0.161841	200.165	703.2	11.7
M200T742	4.01161e+06	4.51567e+06	46.67	3.37594e+06	3.61261e+06	41.25	1.19	0.25	0.441803	0.35	0.702485	0.345773	200.147	742	12.4
M200T770	1.57942e+06	1.38202e+06	30.05	676637	616880	46.15	2.33	1.22	0.000621601	3.21	0.0140919	1.90957	200.172	770.5	12.8
M200T80	1.55844e+07	1.56004e+07	12.49	1.48779e+07	1.53493e+07	14.04	1.05	0.07	0.441803	0.35	0.702485	0.456957	200.041	79.6	1.3
M201T102	6.28393e+06	6.29444e+06	10.71	6.38758e+06	6.79109e+06	20.67	0.98	-0.02	0.645377	0.19	0.837808	0.0393675	201.065	101.8	1.7
M201T104	3.13315e+07	3.21905e+07	27.13	3.53616e+07	3.07207e+07	27.62	0.89	-0.17	0.878477	0.06	0.952443	0.636708	201.016	103.7	1.7
M201T113	1.94337e+06	2.14182e+06	50.92	3.4718e+06	3.34689e+06	34.19	0.56	-0.84	0.014763	1.83	0.0952789	1.34352	201.052	112.7	1.9
M201T327	670273	625735	49.61	870709	902293	33.12	0.77	-0.38	0.234499	0.63	0.504207	0.882602	201.095	327.4	5.5
M201T48	4.45469e+06	4.90121e+06	29.51	4.34406e+06	4.57384e+06	38.09	1.03	0.04	0.95913	0.02	0.985204	0.233974	200.971	47.7	0.8
M201T540	671177	653855	29.11	1.59786e+06	629755	119.09	0.42	-1.25	0.95913	0.02	0.985204	0.813883	201.128	540.1	9
M201T559	1.34846e+06	1.52601e+06	54.59	746900	940730	58.27	1.81	0.85	0.104895	0.98	0.317905	0.909231	201.128	558.8	9.3
M201T573_1	7.62232e+07	7.41461e+07	41.9	5.2961e+07	5.16013e+07	41.29	1.44	0.53	0.104895	0.98	0.317905	1.00357	200.521	573.2	9.6
M201T573_2	4.42935e+07	4.60507e+07	36.34	1.96521e+07	2.06498e+07	35.93	2.25	1.17	0.0029526	2.53	0.0361958	1.78916	200.856	573.1	9.6
M201T573_3	3937727	4.0557e+06	57.99	2.82343e+06	2.81608e+06	29.52	1.39	0.48	0.505361	0.3	0.749981	0.547799	201.19	573.2	9.6
M201T577	671661	587581	54.89	1.41357e+06	1.18244e+06	66.83	0.48	-1.07	0.0281274	1.55	0.141969	1.48036	201.147	577.2	9.6
M201T642	1.20718e+07	1.2161e+07	51.66	6.089e+06	4.97777e+06	61.21	1.98	0.99	0.0649573	1.19	0.238167	1.23498	201.159	642	10.7
M201T72	7.38782e+06	6.31723e+06	33.63	8.82701e+06	1.02922e+07	32.63	0.84	-0.26	0.234499	0.63	0.504207	0.634102	200.974	71.6	1.2
M201T726	990850	906148	28.04	1.74288e+06	1.69373e+06	31.4	0.57	-0.81	0.004662	2.33	0.0475536	1.79612	201.172	725.5	12.1
M201T734	1.13095e+06	1.06766e+06	44.73	1.13688e+06	1.01802e+06	55.22	0.99	-0.01	0.878477	0.06	0.952443	0.13013	201.127	734	12.2
M201T779	962834	902365	36.68	1.42866e+06	1.50057e+06	38.39	0.67	-0.57	0.104895	0.98	0.317905	1.08516	201.196	779	13
M201T797	4.6841e+06	4.92252e+06	47.91	3.90797e+06	3.87575e+06	31.03	1.2	0.26	0.441803	0.35	0.702485	0.270789	201.128	796.6	13.3
M201T84	5.72052e+06	5.68616e+06	11.12	4.864e+06	5.19687e+06	29.52	1.18	0.23	0.382284	0.42	0.64771	1.06594	201.054	84.3	1.4
M201T98	1.7716e+06	1.76854e+06	52.35	1.89488e+06	1.92123e+06	27.81	0.93	-0.1	0.95913	0.02	0.985204	0.562997	200.987	97.7	1.6
M202T102	603000	387080	78.83	1.17322e+06	712276	99.33	0.51	-0.96	0.278632	0.55	0.551712	0.516299	201.567	101.8	1.7
M202T104	1.71229e+06	1.73809e+06	30.94	1.13595e+06	1.12533e+06	40.63	1.51	0.59	0.0379176	1.42	0.171246	1.19131	202.019	103.7	1.7
M202T110	527102	238743	91.45	1.1278e+06	999105	32.15	0.47	-1.1	0.0498834	1.3	0.201689	1.61409	202.071	109.8	1.8
M202T111	4.92854e+06	4.59361e+06	61	1.26438e+07	1.16066e+07	40	0.39	-1.36	0.0018648	2.73	0.0275628	1.70441	202.082	110.9	1.8
M202T122	3.3272e+08	3.27891e+08	26.78	3.18777e+08	3.29782e+08	25.81	1.04	0.06	0.878477	0.06	0.952443	0.234864	202.18	121.9	2
M202T140	1.46924e+07	1.38293e+07	20.12	2.72826e+07	1.80987e+07	95.33	0.54	-0.89	0.0379176	1.42	0.171246	1.17657	202.107	140	2.3
M202T160	3.46202e+07	3.29092e+07	50.2	6.29326e+06	4.42239e+06	102.54	5.5	2.46	0.000621601	3.21	0.0140919	2.05582	202.18	159.7	2.7
M202T228	1.26971e+06	787438	66.52	1.73556e+06	1.76142e+06	32.68	0.73	-0.45	0.441803	0.35	0.702485	0.931742	202.071	227.9	3.8
M202T233	1.10067e+07	1.13207e+07	42.37	7.50772e+06	7.59737e+06	25.13	1.47	0.55	0.104895	0.98	0.317905	1.1492	202.108	232.8	3.9
M202T260	3.31005e+07	3.41776e+07	26.92	3.29265e+07	3.39314e+07	37.77	1.01	0.01	0.95913	0.02	0.985204	0.101741	202.108	260.2	4.3
M202T288	771694	671295	62.71	458669	560478	58.19	1.68	0.75	0.278632	0.55	0.551712	0.943468	202.071	288.4	4.8
M202T298	1.44051e+06	1.20008e+06	50.87	1.57422e+06	1.47518e+06	38.68	0.92	-0.13	0.573737	0.24	0.794466	0.343758	202.18	297.7	5
M202T301	2.3635e+06	2.20966e+06	75.36	1.17564e+06	1.12535e+06	33.7	2.01	1.01	0.645377	0.19	0.837808	0.647494	202.071	301.4	5
M202T356	2.45148e+07	2.29788e+07	24.13	2.98362e+07	2.65474e+07	52.27	0.82	-0.28	0.645377	0.19	0.837808	0.366704	202.107	356.4	5.9
M202T358	866109	1.01339e+06	45	735641	539229	66.78	1.18	0.24	0.878477	0.06	0.952443	0.417244	202.144	357.5	6
M202T400	1.39218e+09	1.23081e+09	50.57	1.62335e+09	9.25273e+08	89.71	0.86	-0.22	0.573737	0.24	0.794466	0.0431928	202.044	399.5	6.7
M202T439	3.55689e+06	3.55027e+06	60.62	3.97677e+06	4.36298e+06	59.59	0.89	-0.16	0.798446	0.1	0.918313	0.0902043	202.18	438.7	7.3
M202T465	153960	159656	27.74	212248	177481	46.24	0.73	-0.46	0.278632	0.55	0.551712	0.728614	202.053	465.4	7.8
M202T502	453137	319140	77.64	585090	534009	89.5	0.77	-0.37	0.95913	0.02	0.985204	0.0562553	202.217	501.9	8.4
M202T573	205761	165619	77.8	419250	387770	37.74	0.49	-1.03	0.0379176	1.42	0.171246	1.40639	201.524	573.2	9.6
M202T582	1.11331e+06	881536	77.31	978716	953987	53.69	1.14	0.19	1	0	1	0.104236	202.045	581.8	9.7
M202T595	442830	433262	32.02	583188	555488	51.75	0.76	-0.4	0.382284	0.42	0.64771	0.538988	202.144	595.2	9.9
M202T624	320246	301579	39.07	326051	252534	42.42	0.98	-0.03	0.878477	0.06	0.952443	0.052361	202.217	623.7	10.4
M202T642	623540	586619	35.03	552231	508252	41.76	1.13	0.18	0.573737	0.24	0.794466	0.521731	202.163	642	10.7
M202T680	5.12823e+06	5.31842e+06	22.22	3.84429e+06	4.18181e+06	26.38	1.33	0.42	0.0649573	1.19	0.238167	1.33886	202.217	680.5	11.3
M202T694	1.20377e+06	1.24982e+06	21.33	838350	806171	37.95	1.44	0.52	0.0281274	1.55	0.141969	1.37085	202.162	694.4	11.6
M202T72	2.27143e+06	2.14273e+06	35.45	1.7131e+06	1.62259e+06	24.84	1.33	0.41	0.0829837	1.08	0.275972	1.08385	201.974	71.7	1.2
M202T725	222624	221519	18.62	345411	344406	20.74	0.64	-0.63	0.0029526	2.53	0.0361958	1.87071	201.674	725.4	12.1
M202T83_1	2.58759e+07	2.66217e+07	11.81	2.16757e+07	2.27702e+07	21.01	1.19	0.26	0.0498834	1.3	0.201689	1.24452	201.933	83.3	1.4
M203T101	2.74817e+06	2.6116e+06	14.48	2.72244e+06	2.64583e+06	18.87	1.01	0.01	0.95913	0.02	0.985204	0.138216	203.049	101.4	1.7
M203T109	5.84904e+06	5.62328e+06	8.85	4.76288e+06	4.84227e+06	10.51	1.23	0.3	0.0001554	3.81	0.00610078	1.86485	203.114	109.5	1.8
M203T111	427759	368309	58.08	701352	598083	51.31	0.61	-0.71	0.014763	1.83	0.0952789	1.28193	203.086	111	1.9
M203T122	3.61961e+07	2.61596e+07	69.14	2.13914e+07	2.08435e+07	23.85	1.69	0.76	0.382284	0.42	0.64771	0.979834	203.183	121.9	2
M203T258	1.26006e+06	1.15835e+06	44.37	906595	901886	43.93	1.39	0.47	0.278632	0.55	0.551712	0.743932	203.003	257.9	4.3
M203T311	2.31934e+06	2.48111e+06	28.99	1.58046e+06	1.59937e+06	27.18	1.47	0.55	0.0379176	1.42	0.171246	1.42087	202.566	310.7	5.2
M203T323	1.59987e+06	1.48707e+06	40.71	1.61806e+06	1.71579e+06	24.43	0.99	-0.02	1	0	1	0.251863	202.566	323.4	5.4
M203T356	2.31156e+06	2.54609e+06	39.28	3.00168e+06	1.99765e+06	77.94	0.77	-0.38	0.95913	0.02	0.985204	0.308156	203.111	356.4	5.9
M203T365	1.18036e+06	1.13092e+06	24.34	870252	711895	60.65	1.36	0.44	0.014763	1.83	0.0952789	1.19767	203.139	365.5	6.1
M203T400	1.42272e+08	1.38905e+08	30.19	1.45e+08	1.37819e+08	46.72	0.98	-0.03	1	0	1	0.137652	203.048	399.5	6.7
M203T439	480268	526316	35.63	213023	146116	89.12	2.25	1.17	0.004662	2.33	0.0475536	1.32877	203.183	438.7	7.3
M203T555	4.09661e+06	3.81465e+06	47.57	4.52221e+06	4.37618e+06	23.78	0.91	-0.14	0.104895	0.98	0.317905	0.583943	203.11	554.8	9.2
M203T565	1.03846e+06	975990	58.81	590756	513031	62.08	1.76	0.81	0.130381	0.88	0.362517	1.15661	202.561	565.1	9.4
M203T681	497090	446401	45.8	526512	522173	48.51	0.94	-0.08	0.720901	0.14	0.878065	0.0730266	203.22	680.6	11.3
M203T70	1.06781e+06	937602	32.47	940954	987554	12.11	1.13	0.18	0.798446	0.1	0.918313	0.572722	202.629	70	1.2
M203T707	595801	627518	37.31	261686	281403	63.43	2.28	1.19	0.004662	2.33	0.0475536	1.33283	203.091	707.2	11.8
M203T72_1	1.98134e+06	1.76079e+06	75.26	3.63078e+06	3.54217e+06	52.74	0.55	-0.87	0.0649573	1.19	0.238167	1.04969	202.97	71.7	1.2
M203T72_2	1.12498e+06	1.13212e+06	4.31	1.08452e+06	1.11188e+06	7.66	1.04	0.05	0.328205	0.48	0.600385	0.737988	203.007	71.8	1.2
M203T747	2.06223e+06	1.90307e+06	25.47	1.72665e+06	1.67456e+06	16.68	1.19	0.26	0.160528	0.79	0.408129	0.982103	203.107	747	12.4
M203T91	927167	912158	45.16	1.13103e+06	983693	43.72	0.82	-0.29	0.505361	0.3	0.749981	0.710176	203.053	90.9	1.5
M203T94	5.69539e+07	4.99109e+07	45.22	6.22251e+07	6.14551e+07	60.77	0.92	-0.13	0.798446	0.1	0.918313	0.223322	203.15	94.3	1.6
M203T97	1.06889e+07	1.07514e+07	10.72	7.07651e+06	7.17021e+06	17.43	1.51	0.59	0.0001554	3.81	0.00610078	2.05581	203.102	96.7	1.6
M204T105_1	7.04019e+06	6.63883e+06	21.08	7.64856e+06	6.41615e+06	50.04	0.92	-0.12	0.878477	0.06	0.952443	0.0464832	204.032	105.3	1.8
M204T117	5.26427e+07	5.2617e+07	7.23	3.87895e+07	4.07375e+07	32.61	1.36	0.44	0.0104118	1.98	0.0771942	1.43104	204.087	116.6	1.9
M204T122	4.31116e+09	4.73456e+09	25.79	4.72069e+09	4.65479e+09	12.43	0.91	-0.13	0.798446	0.1	0.918313	0.655027	204.122	121.5	2
M204T136	3.03962e+08	2.99515e+08	28.62	4.42634e+08	3.54339e+08	85.81	0.69	-0.54	0.573737	0.24	0.794466	0.263346	204.122	135.9	2.3
M204T204	1.40128e+06	1.37347e+06	10.17	1.46081e+06	1.46721e+06	3.77	0.96	-0.06	0.160528	0.79	0.408129	0.790974	203.971	203.5	3.4
M204T304	1.18217e+06	1.11357e+06	60.34	1.65558e+06	1.55829e+06	38.94	0.71	-0.49	0.234499	0.63	0.504207	1.03408	204.124	303.7	5.1
M204T324	1.32788e+06	360772	188.75	3.22007e+06	705533	124.43	0.41	-1.28	0.382284	0.42	0.64771	0.371913	204.123	324	5.4
M204T371	1.14627e+06	1.16764e+06	60.6	2.46717e+06	2.70164e+06	33.42	0.46	-1.11	0.014763	1.83	0.0952789	1.61733	204.123	371	6.2
M204T375	6.48314e+06	5.86481e+06	77.21	4.37118e+06	3.84751e+06	59.08	1.48	0.57	0.645377	0.19	0.837808	0.258178	204.032	375	6.2
M204T390	500571	566193	41.44	538383	590721	27	0.93	-0.11	0.95913	0.02	0.985204	0.411581	204.113	390	6.5
M204T474	842929	313613	112.77	1.01078e+06	1.01114e+06	58.81	0.83	-0.26	0.328205	0.48	0.600385	0.675629	204.069	473.7	7.9
M204T478	2.15396e+06	2.20103e+06	47.97	709364	743485	57.34	3.04	1.6	0.0018648	2.73	0.0275628	1.72243	204.195	477.6	8
M204T511	6.118e+06	6.47024e+06	36.75	7.63994e+06	6.81778e+06	41.34	0.8	-0.32	0.573737	0.24	0.794466	0.767267	204.123	511.4	8.5
M204T527	246905	256058	43.2	194926	178320	53.73	1.27	0.34	0.328205	0.48	0.600385	0.649554	204.105	527.4	8.8
M204T555	389238	383067	25.62	352986	337232	39	1.1	0.14	0.505361	0.3	0.749981	0.557411	204.113	554.8	9.2
M204T75	1.3351e+06	804934	64.92	1.40533e+06	1.25142e+06	58.58	0.95	-0.07	1	0	1	0.0945919	204.134	75.1	1.3
M204T90	1.45095e+07	1.66114e+07	32.24	8.94537e+06	9.64112e+06	46.69	1.62	0.7	0.0206682	1.68	0.117429	1.30734	204.087	90.4	1.5
M204T94	3.26376e+06	2.95634e+06	35.15	5.21936e+06	4.99775e+06	35.71	0.63	-0.68	0.0379176	1.42	0.171246	1.39496	204.153	94.1	1.6
M204T98	1.87113e+07	1.95286e+07	20.48	1.75984e+07	1.8375e+07	25.75	1.06	0.09	0.573737	0.24	0.794466	0.308413	204.098	98	1.6
M204T99	3.30389e+07	3.16897e+07	34.08	2.98715e+07	3.00016e+07	17.58	1.11	0.15	0.95913	0.02	0.985204	0.337799	204.087	99.2	1.7
M205T105	314217	319677	74.95	274506	298938	54.82	1.14	0.19	0.95913	0.02	0.985204	0.24507	205.036	105.3	1.8
M205T115	670821	712662	50.64	961165	665776	89.87	0.7	-0.52	0.878477	0.06	0.952443	0.130907	204.993	114.6	1.9
M205T116	5.96044e+06	5.63027e+06	39.63	2.47248e+06	2.95145e+06	50.34	2.41	1.27	0.0104118	1.98	0.0771942	1.40238	205.09	116.4	1.9
M205T121	3.05047e+06	2.79979e+06	44.39	4.04007e+06	4.08326e+06	28.15	0.76	-0.41	0.160528	0.79	0.408129	1.01833	205.064	120.9	2
M205T122	2.90441e+08	3.29316e+08	54.12	4.14109e+08	4.08731e+08	16.02	0.7	-0.51	0.130381	0.88	0.362517	1.28458	205.126	121.5	2
M205T137	1.41032e+06	1.55165e+06	34.51	1.30387e+06	1.43757e+06	37.74	1.08	0.11	0.505361	0.3	0.749981	0.0956528	205.029	137.1	2.3
M205T203	1.09176e+06	1.08527e+06	27.41	905362	696086	85.88	1.21	0.27	0.130381	0.88	0.362517	0.882493	204.98	203.3	3.4
M205T712	1.86514e+06	1.71586e+06	34.47	2.09409e+06	1.63254e+06	40.7	0.89	-0.17	0.382284	0.42	0.64771	0.349055	205.122	711.8	11.9
M205T737	6.29044e+06	6.58094e+06	35.84	5.46392e+06	5.4301e+06	13.32	1.15	0.2	0.234499	0.63	0.504207	0.287082	205.143	737.5	12.3
M205T769	1.54544e+06	1.45511e+06	20.3	1.706e+06	1.78378e+06	25.65	0.91	-0.14	0.382284	0.42	0.64771	0.394526	205.122	769.5	12.8
M205T77	119036	100134	82.92	140810	83573.7	105.41	0.85	-0.24	1	0	1	0.0417344	204.957	77	1.3
M205T79	4.06785e+06	3.75764e+06	20.05	3.77752e+06	3.81446e+06	2.99	1.08	0.11	0.878477	0.06	0.952443	0.579007	205.155	78.5	1.3
M205T804	5.64473e+06	6.3447e+06	29.27	5.68412e+06	5.762e+06	22.39	0.99	-0.01	0.95913	0.02	0.985204	0.107255	205.137	803.7	13.4
M205T836	4.25087e+06	3.75635e+06	30.26	5.61651e+06	3.46557e+06	75.64	0.76	-0.4	0.798446	0.1	0.918313	0.301421	205.159	835.9	13.9
M205T98	1.43669e+06	1.11992e+06	77.96	1.66793e+06	1.56178e+06	53.24	0.86	-0.22	0.645377	0.19	0.837808	0.513163	205.101	98.2	1.6
M206T101	1.25943e+06	1.15601e+06	60.73	838148	750528	54.52	1.5	0.59	0.160528	0.79	0.408129	0.335583	206.121	100.8	1.7
M206T110	1.3029e+06	1.29748e+06	15.38	1.41907e+06	1.52224e+06	34.57	0.92	-0.12	0.573737	0.24	0.794466	0.155409	206.066	109.5	1.8
M206T112	1.76925e+06	1.54368e+06	61.08	536557	552833	18.49	3.3	1.72	0.004662	2.33	0.0475536	1.82466	206.139	112.4	1.9
M206T113	2.98099e+07	31449021	31.3	3.61696e+07	3.69648e+07	31.66	0.82	-0.28	0.328205	0.48	0.600385	0.749729	206.152	112.8	1.9
M206T122	4.83671e+07	4.89784e+07	19.15	4.19906e+07	3.74104e+07	51.04	1.15	0.2	0.645377	0.19	0.837808	0.749123	206.127	121.5	2
M206T356	4.3568e+06	3.97439e+06	35	3.0789e+06	2.84208e+06	26.64	1.42	0.5	0.0498834	1.3	0.201689	1.20201	206.138	356.1	5.9
M206T390	312513	118693	103.39	227292	194023	52.13	1.37	0.46	0.573737	0.24	0.794466	0.167612	206.049	390.2	6.5
M206T403	2.25815e+06	2.28657e+06	36.13	1.84631e+06	1.6858e+06	72.43	1.22	0.29	0.505361	0.3	0.749981	0.796074	206.056	403.4	6.7
M206T454_2	319277	324790	40.49	218417	220461	56.2	1.46	0.55	0.194872	0.71	0.457172	1.08168	206.048	454.3	7.6
M206T545	848240	699986	45.46	1.2987e+06	1.30556e+06	26.24	0.65	-0.61	0.0379176	1.42	0.171246	1.481	206.081	545.3	9.1
M206T689	262995	280127	37.87	80303.3	71586.6	38.16	3.28	1.71	0.000621601	3.21	0.0140919	2.14034	206.19	688.8	11.5
M206T697	891420	849698	29.69	612930	613803	35.81	1.45	0.54	0.104895	0.98	0.317905	1.3284	205.614	697.3	11.6
M206T737	716252	728483	51.48	583718	558239	36.97	1.23	0.3	0.573737	0.24	0.794466	0.410055	206.147	737.4	12.3
M206T83	1.0969e+07	5.50698e+06	82.67	1.67221e+07	2.07095e+07	69.67	0.66	-0.61	0.441803	0.35	0.702485	0.369684	206.055	83.5	1.4
M206T91	715525	712555	30.99	730923	803576	33.77	0.98	-0.03	0.720901	0.14	0.878065	0.02228	206.066	91.2	1.5
M206T99	8072321	7.65601e+06	32.07	1.34394e+07	1.39246e+07	14.39	0.6	-0.74	0.0018648	2.73	0.0275628	1.9296	206.102	98.9	1.6
M207T113_2	343465	425516	45.02	842703	819308	49.37	0.41	-1.29	0.0104118	1.98	0.0771942	1.07731	207.155	112.8	1.9
M207T114	530831	569065	14.85	99821.9	63664.1	71.39	5.32	2.41	0.0001554	3.81	0.00610078	2.24787	206.959	114.3	1.9
M207T348	1.6566e+06	1.54525e+06	17.84	1.09185e+06	1.04819e+06	14.68	1.52	0.6	0.0001554	3.81	0.00610078	2.0645	207.088	347.9	5.8
M207T377	1.03837e+06	817911	48.1	987304	832158	44.63	1.05	0.07	0.798446	0.1	0.918313	0.204933	207.076	377.5	6.3
M207T397	8.14404e+06	4.75264e+06	101.12	1.0305e+07	9.78103e+06	35.94	0.79	-0.34	0.194872	0.71	0.457172	0.998713	207.103	397.2	6.6
M207T423	207680	116984	120.7	386187	284304	93.79	0.54	-0.89	0.0829837	1.08	0.275972	1.09367	207.059	423.1	7.1
M207T587	346313	349286	27.46	220978	212039	38.12	1.57	0.65	0.014763	1.83	0.0952789	1.37461	206.662	586.7	9.8
M207T596	3.12764e+06	2.90729e+06	38.9	3.08996e+06	3.06946e+06	26.71	1.01	0.02	0.645377	0.19	0.837808	0.0112874	207.159	596.3	9.9
M207T597	224716	264540	33.66	225874	230352	17.73	0.99	-0.01	0.573737	0.24	0.794466	0.240486	207.124	597.4	10
M207T653	374550	249619	74.65	421222	500590	54.83	0.89	-0.17	0.720901	0.14	0.878065	0.230551	207.102	653.1	10.9
M207T701	1.01601e+06	1140694	29.75	1.25145e+06	1.28703e+06	21.2	0.81	-0.3	0.104895	0.98	0.317905	0.943406	207.138	701.1	11.7
M207T749	2.46939e+06	2.67845e+06	27.21	3.65431e+06	2.83698e+06	67.19	0.68	-0.57	0.234499	0.63	0.504207	0.931878	207.174	748.9	12.5
M207T78	5.12359e+07	5.10225e+07	1.33	5.11853e+07	5.17267e+07	4.06	1	0	0.328205	0.48	0.600385	0.0734732	207.05	78.4	1.3
M207T81	2.66989e+07	2.05249e+07	59.7	2.02804e+07	2.07352e+07	22.91	1.32	0.4	0.441803	0.35	0.702485	0.713005	206.886	81.1	1.4
M207T88	1.6856e+06	1.49772e+06	48.21	1.12106e+06	1.07852e+06	19.96	1.5	0.59	0.0829837	1.08	0.275972	1.2035	207.005	88.4	1.5
M207T99	541700	581876	32.27	761215	753118	12.42	0.71	-0.49	0.004662	2.33	0.0475536	1.51017	207.106	99.1	1.7
M208T330	3.77002e+06	4.29172e+06	37.12	4.45519e+06	4.39284e+06	53.82	0.85	-0.24	0.720901	0.14	0.878065	0.352892	208.133	329.6	5.5
M208T346	1.04803e+07	9.74988e+06	82.87	1.93662e+07	1.35323e+07	107.54	0.54	-0.89	0.720901	0.14	0.878065	0.39036	208.133	346.4	5.8
M208T372	4.09204e+06	3.91538e+06	30.34	5.21412e+06	4.14989e+06	48.64	0.78	-0.35	0.505361	0.3	0.749981	0.725417	207.639	371.7	6.2
M208T373	1.77216e+06	1.73629e+06	87.89	1.93882e+06	1.58387e+06	75.91	0.91	-0.13	0.441803	0.35	0.702485	0.456919	208.134	372.7	6.2
M208T528	1.06831e+06	1.16279e+06	46.45	840932	693196	83.79	1.27	0.35	0.441803	0.35	0.702485	0.632739	208.096	527.6	8.8
M208T575	569148	499049	67.61	741432	649934	52.8	0.77	-0.38	0.382284	0.42	0.64771	0.57922	208.19	574.5	9.6
M208T596	304132	303655	36.31	353974	365506	49.72	0.86	-0.22	0.720901	0.14	0.878065	0.223405	208.162	596.4	9.9
M208T616_1	1.59642e+06	1.80473e+06	39.71	612092	479555	77.75	2.61	1.38	0.004662	2.33	0.0475536	1.53144	207.67	616.3	10.3
M208T616_2	318685	305270	15.79	350749	351943	38.03	0.91	-0.14	0.720901	0.14	0.878065	0.0732878	208.171	616.2	10.3
M208T690	578353	596368	29.4	446161	433787	55.25	1.3	0.37	0.194872	0.71	0.457172	0.979067	208.169	689.8	11.5
M208T71	471888	450568	11.53	415040	419135	8.14	1.14	0.19	0.0281274	1.55	0.141969	1.38216	207.957	71.4	1.2
M208T72	1.40929e+06	1.40007e+06	7.19	1.27876e+06	1.29055e+06	15.09	1.1	0.14	0.160528	0.79	0.408129	1.01647	207.986	72	1.2
M208T78	2.82108e+06	2.69236e+06	35.17	6.36543e+06	5.86416e+06	34.3	0.44	-1.17	0.0010878	2.96	0.0203124	1.97661	208.054	78.3	1.3
M208T83	759390	620064	33.51	1.07975e+06	1.09647e+06	18.88	0.7	-0.51	0.0281274	1.55	0.141969	1.564	207.972	82.5	1.4
M208T87	1.28232e+06	1.23463e+06	35.21	1.72745e+06	1.39519e+06	64.85	0.74	-0.43	0.645377	0.19	0.837808	0.46978	208.081	87.4	1.5
M209T130	1.49152e+06	1.38297e+06	38.84	2.2331e+06	2.15241e+06	18.97	0.67	-0.58	0.0104118	1.98	0.0771942	1.54879	209.092	129.7	2.2
M209T260	1.16265e+06	1.16651e+06	27.33	1.33587e+06	1.34242e+06	20.07	0.87	-0.2	0.234499	0.63	0.504207	0.725435	208.992	259.6	4.3
M209T303	258260	156233	124.27	320395	324800	56.83	0.81	-0.31	0.328205	0.48	0.600385	0.885086	209.067	303.2	5.1
M209T334	3.93774e+06	3.03874e+06	81.65	7.43293e+06	5.58204e+06	93.09	0.53	-0.92	0.0498834	1.3	0.201689	1.09331	209.092	333.6	5.6
M209T355	1.05922e+06	1.11989e+06	29.45	1.41919e+06	1.27526e+06	40.63	0.75	-0.42	0.328205	0.48	0.600385	1.03293	209.129	355	5.9
M209T357	5.08776e+06	5.49538e+06	26.48	6.03461e+06	3.52753e+06	75.82	0.84	-0.25	0.505361	0.3	0.749981	0.0104608	209.103	356.7	5.9
M209T366	2.82629e+06	2.9105e+06	29.17	4.94177e+06	5.17923e+06	48.22	0.57	-0.81	0.014763	1.83	0.0952789	0.593328	209.128	366.4	6.1
M209T396	1.42258e+07	1.50335e+07	36.9	1.64544e+07	1.56583e+07	76.03	0.86	-0.21	0.95913	0.02	0.985204	0.415467	209.137	396.2	6.6
M209T527	495094	523766	42.81	561017	546672	42.74	0.88	-0.18	0.573737	0.24	0.794466	0.34135	209.128	527	8.8
M209T544	714676	694516	83.93	475948	483244	43.36	1.5	0.59	0.573737	0.24	0.794466	0.0793314	209.128	544.4	9.1
M209T590	1.56685e+06	1.49274e+06	14.34	1.92959e+06	1.747e+06	31.3	0.81	-0.3	0.160528	0.79	0.408129	0.881142	209.063	590.2	9.8
M209T642	528194	477545	31.99	344354	292968	50.81	1.53	0.62	0.0498834	1.3	0.201689	1.37957	208.678	642.3	10.7
M209T693	415427	290259	84.01	2.22969e+06	926814	126.06	0.19	-2.42	0.0104118	1.98	0.0771942	1.55122	209.117	692.9	11.5
M209T792	1.83616e+06	1.92399e+06	59.9	2.27357e+06	1.53978e+06	87.86	0.81	-0.31	0.720901	0.14	0.878065	0.0617522	209.154	792.3	13.2
M209T797	1.13673e+06	964836	36.81	1.02121e+06	953988	20.56	1.11	0.15	0.95913	0.02	0.985204	0.25776	209.096	797.4	13.3
M209T81	7.3413e+06	6.44086e+06	71.63	7.54616e+06	3.98338e+06	80.55	0.97	-0.04	0.645377	0.19	0.837808	0.0857499	208.884	81.1	1.4
M209T810	5.45057e+06	5.42651e+06	18.37	2.70285e+06	2.7806e+06	53.63	2.02	1.01	0.0010878	2.96	0.0203124	1.65246	209.19	810.4	13.5
M209T99	1.36933e+06	1.38991e+06	7.24	1.05971e+06	935195	33.86	1.29	0.37	0.104895	0.98	0.317905	1.44626	209.103	98.9	1.6
M210T103	6.92887e+06	7.10845e+06	26.65	7.03371e+06	6.96657e+06	21.62	0.99	-0.02	0.798446	0.1	0.918313	0.199127	210.043	102.9	1.7
M210T107	460650	447717	38.97	648304	645364	16.26	0.71	-0.49	0.0498834	1.3	0.201689	1.38208	210.098	107.1	1.8
M210T108	954154	778130	55	1.14211e+06	928783	56.85	0.84	-0.26	0.720901	0.14	0.878065	0.469445	210.087	107.8	1.8
M210T112	624314	603611	91.96	501173	352161	116.12	1.25	0.32	0.720901	0.14	0.878065	0.387926	210.124	111.9	1.9
M210T137	1.80074e+06	1.69313e+06	38.28	2.68485e+06	2.41514e+06	25.73	0.67	-0.58	0.0498834	1.3	0.201689	1.43536	210.008	136.7	2.3
M210T145	3.25034e+06	2.92264e+06	64.83	3.64105e+06	3.62148e+06	33.78	0.89	-0.16	0.573737	0.24	0.794466	0.600122	210.135	144.7	2.4
M210T309	4.86277e+06	4.95698e+06	12.31	3.61072e+06	3.80028e+06	23.5	1.35	0.43	0.00699301	2.16	0.0602244	1.57119	209.985	308.8	5.1
M210T322	1.3361e+06	1.02019e+06	80.91	1.83335e+06	2.08368e+06	51.73	0.73	-0.46	0.441803	0.35	0.702485	0.676308	210.124	321.9	5.4
M210T333	457730	473269	21.96	461718	420316	37.28	0.99	-0.01	0.645377	0.19	0.837808	0.0648561	210.096	333.4	5.6
M210T360_2	857278	552323	108.17	656132	445045	104.42	1.31	0.39	0.798446	0.1	0.918313	0.306045	210.197	359.9	6
M210T366	437646	396984	49.49	432729	429113	58.09	1.01	0.02	1	0	1	0.133187	210.132	366.4	6.1
M210T396	4.16707e+06	3.2009e+06	86.81	6.94312e+06	5.78336e+06	88.08	0.6	-0.74	0.382284	0.42	0.64771	0.664094	210.142	396	6.6
M210T485	736309	743077	20.6	544287	597233	27.26	1.35	0.44	0.00699301	2.16	0.0602244	1.28876	210.111	484.9	8.1
M210T597	1.09046e+06	1.03859e+06	45.35	935525	768759	54.13	1.17	0.22	0.441803	0.35	0.702485	0.399936	210.112	596.9	9.9
M210T720	1.34378e+06	1.27531e+06	24.93	786943	688948	33.77	1.71	0.77	0.004662	2.33	0.0475536	1.81484	210.112	720.3	12
M210T728	2.50756e+06	2.25231e+06	35.59	2.85462e+06	3.18599e+06	35.69	0.88	-0.19	0.505361	0.3	0.749981	0.432493	210.185	728.1	12.1
M210T99	777645	666398	40.94	809396	661291	55.64	0.96	-0.06	0.95913	0.02	0.985204	0.0262642	209.988	99.2	1.7
M211T108	220700	189479	51.36	409328	396786	28.03	0.54	-0.89	0.0104118	1.98	0.0771942	1.69169	211.071	107.9	1.8
M211T121	6.83433e+06	7.69799e+06	53.02	3.98471e+06	3.6859e+06	71.15	1.72	0.78	0.0829837	1.08	0.275972	1.04535	211.119	121.5	2
M211T137	3.73543e+06	3.9282e+06	40.05	5.70403e+06	5.80227e+06	54.46	0.65	-0.61	0.234499	0.63	0.504207	0.478473	211.007	137	2.3
M211T203	748697	856333	67	863116	886187	37.28	0.87	-0.21	0.878477	0.06	0.952443	0.592032	210.992	203	3.4
M211T319	615926	635712	38.31	1.00582e+06	972194	36.33	0.61	-0.71	0.0498834	1.3	0.201689	1.30042	211.107	318.6	5.3
M211T349	953950	858940	30.48	642257	721483	40.24	1.49	0.57	0.130381	0.88	0.362517	1.25281	210.597	348.9	5.8
M211T360	101195	110021	41.7	276638	278160	32.38	0.37	-1.45	0.004662	2.33	0.0475536	1.89431	211.174	359.9	6
M211T406	558388	532816	71.27	200176	215302	24.35	2.79	1.48	0.130381	0.88	0.362517	1.34099	211.107	405.9	6.8
M211T417	2.37335e+06	2.17046e+06	69.08	4.7948e+06	4.84616e+06	55.92	0.49	-1.01	0.0498834	1.3	0.201689	0.622256	211.107	417.4	7
M211T421	879802	822460	28.95	536936	445364	57.29	1.64	0.71	0.0829837	1.08	0.275972	1.31306	211.06	421.4	7
M211T495	4.82275e+06	5.33836e+06	36	5.07465e+06	4.23068e+06	42.46	0.95	-0.07	0.95913	0.02	0.985204	0.190858	211.144	495.1	8.3
M211T512	4.02053e+06	3.87345e+06	97.13	6.10199e+06	5.69757e+06	66.69	0.66	-0.6	0.160528	0.79	0.408129	0.845961	211.144	512.5	8.5
M211T565	494445	418988	41.18	468574	480223	31.79	1.06	0.08	0.798446	0.1	0.918313	0.198394	210.547	565.1	9.4
M211T605	2.21113e+06	2.17151e+06	38.34	2.53593e+06	2.34001e+06	18.62	0.87	-0.2	0.328205	0.48	0.600385	0.799484	211.133	605.3	10.1
M211T614	1.25121e+06	1.24452e+06	34.96	1.76288e+06	1.46706e+06	54.95	0.71	-0.49	0.382284	0.42	0.64771	0.751087	211.169	614	10.2
M211T622	420029	435599	35.1	432908	405412	43.94	0.97	-0.04	0.878477	0.06	0.952443	0.0487015	211.107	622.2	10.4
M211T744	2.70024e+07	2.4482e+07	41.23	2.75538e+07	2.68046e+07	19.83	0.98	-0.03	0.798446	0.1	0.918313	0.379518	211.169	744.2	12.4
M211T755	3.84101e+06	3.96216e+06	36.03	2.28396e+06	2.14719e+06	44.52	1.68	0.75	0.0281274	1.55	0.141969	1.32902	211.144	754.7	12.6
M211T78	1.38673e+06	1.40027e+06	14.75	1.6099e+06	1.76226e+06	24.91	0.86	-0.22	0.160528	0.79	0.408129	0.735239	211.142	77.9	1.3
M211T812	1.00698e+06	1.0164e+06	21.74	925087	786752	36.49	1.09	0.12	0.505361	0.3	0.749981	0.543258	211.133	812.1	13.5
M212T113	1.73138e+07	2.2526e+07	59.21	1.21166e+07	1.18131e+07	98.6	1.43	0.51	0.798446	0.1	0.918313	0.539003	212.139	113	1.9
M212T114	6.86123e+06	5.6611e+06	88.78	9.80149e+06	5.57295e+06	97.53	0.7	-0.51	1	0	1	0.238067	212.102	113.8	1.9
M212T136	2.45133e+07	2.22404e+07	45.39	7.48954e+06	7.51678e+06	30.63	3.27	1.71	0.0001554	3.81	0.00610078	2.0948	212.003	136.5	2.3
M212T354	3.20963e+06	3.37033e+06	35.79	1.48635e+06	1.47864e+06	18.7	2.16	1.11	0.0018648	2.73	0.0275628	1.93257	212.149	353.5	5.9
M212T377	2.01736e+06	2.21631e+06	63.45	1.31037e+06	1.1722e+06	51.41	1.54	0.62	0.278632	0.55	0.551712	0.571214	212.103	376.5	6.3
M212T427	2.81769e+06	2.805e+06	68.98	4.08958e+06	3.5288e+06	38.85	0.69	-0.54	0.278632	0.55	0.551712	1.08789	212.092	427.5	7.1
M212T465	329277	283623	40.1	601014	642289	40.64	0.55	-0.87	0.0206682	1.68	0.117429	1.45678	212.092	465.4	7.8
M212T506	4.2594e+06	4.29184e+06	25.67	3.78016e+06	3.32978e+06	36.5	1.13	0.17	0.382284	0.42	0.64771	0.576757	212.165	505.6	8.4
M212T533	741470	697465	59.41	2.67642e+06	1.82197e+06	72.72	0.28	-1.85	0.0018648	2.73	0.0275628	1.76747	212.091	532.8	8.9
M212T542	210893	147897	92.34	177564	101614	91.88	1.19	0.25	0.573737	0.24	0.794466	0.155046	212.143	542.2	9
M212T549	1.48652e+06	1.51099e+06	52.02	1.18923e+06	1.40097e+06	42.56	1.25	0.32	0.573737	0.24	0.794466	0.357	212.165	548.7	9.1
M212T643	1.11658e+07	1.23446e+07	44.85	4.10357e+06	2.79763e+06	72.03	2.72	1.44	0.004662	2.33	0.0475536	1.67364	212.165	642.5	10.7
M212T669	1.32778e+07	8.48182e+06	72.02	5.99252e+06	5.29869e+06	46.77	2.22	1.15	0.130381	0.88	0.362517	1.08396	212.165	669.2	11.2
M212T701	235520	212359	30.65	216667	182526	60.95	1.09	0.12	0.160528	0.79	0.408129	0.530374	212.02	700.8	11.7
M212T744	2.72353e+06	2.23463e+06	50.79	2.45978e+06	2.52922e+06	32.63	1.11	0.15	0.95913	0.02	0.985204	0.215471	212.172	744.1	12.4
M212T91_1	227358	112990	139.42	5.1119e+06	4.06025e+06	60.12	0.04	-4.49	0.0001554	3.81	0.00610078	2.33539	212.043	90.7	1.5
M213T108	2.5326e+06	2.6774e+06	27.43	2.89901e+06	2.81378e+06	31.24	0.87	-0.19	0.382284	0.42	0.64771	0.457136	213.123	108.5	1.8
M213T111	653222	649911	57.59	741564	723341	35.08	0.88	-0.18	0.645377	0.19	0.837808	0.572882	213.087	111	1.9
M213T115	734771	746504	20.35	675027	763791	35.2	1.09	0.12	0.798446	0.1	0.918313	0.554405	212.971	114.7	1.9
M213T137	749434	681383	49.24	328568	328080	28.83	2.28	1.19	0.00699301	2.16	0.0602244	1.76364	213.007	137	2.3
M213T146	6.7595e+06	6.68073e+06	9.17	6.23597e+06	6.18927e+06	12.3	1.08	0.12	0.160528	0.79	0.408129	1.01877	213.123	146.5	2.4
M213T179	1.61971e+07	2.01848e+07	49.55	8.02747e+06	5.24646e+06	58.29	2.02	1.01	0.0649573	1.19	0.238167	1.18842	212.988	178.8	3
M213T203	1.01885e+07	1.00779e+07	20.75	1.00194e+07	1.04177e+07	28.48	1.02	0.02	0.95913	0.02	0.985204	0.182	212.988	203	3.4
M213T309	5.10466e+06	4.84752e+06	44.55	7.8263e+06	5.11813e+06	83.39	0.65	-0.62	0.878477	0.06	0.952443	0.514819	212.987	309	5.2
M213T377	402140	476236	46.27	413392	326451	81.16	0.97	-0.04	0.720901	0.14	0.878065	0.315472	212.987	376.8	6.3
M213T382	1.8113e+06	756063	115.59	1.47529e+06	1.09061e+06	99.1	1.23	0.3	0.720901	0.14	0.878065	0.629356	213.113	381.9	6.4
M213T457	493280	416820	44.45	182969	176585	34.15	2.7	1.43	0.0001554	3.81	0.00610078	2.06669	213.023	457.3	7.6
M213T548	488162	540239	26.71	428185	426389	31.74	1.14	0.19	0.505361	0.3	0.749981	0.59087	213.16	547.7	9.1
M213T643	897636	861505	39.67	470255	477574	16.06	1.91	0.93	0.004662	2.33	0.0475536	1.76521	213.168	642.5	10.7
M213T698	3.19148e+06	3.33741e+06	33.16	2.672e+06	3.00541e+06	48.21	1.19	0.26	0.234499	0.63	0.504207	0.530769	213.148	697.7	11.6
M213T705	1.13263e+06	1.07277e+06	29.84	1.35048e+06	1.50981e+06	32.95	0.84	-0.25	0.328205	0.48	0.600385	0.57698	213.102	705.2	11.8
M213T72	2.33042e+06	1.9264e+06	40.27	2.89719e+06	3.07868e+06	43.33	0.8	-0.31	0.573737	0.24	0.794466	0.534812	212.936	71.9	1.2
M213T76	1.73647e+06	1.53693e+06	29.96	1.33892e+06	1.38086e+06	48.47	1.3	0.38	0.328205	0.48	0.600385	0.939567	213.098	76	1.3
M213T82_1	3.38869e+07	3.65619e+07	37.87	4.55338e+07	4.60622e+07	22.03	0.74	-0.43	0.104895	0.98	0.317905	1.15573	212.851	82.1	1.4
M213T82_2	4.39476e+07	3.7032e+07	36.56	2.8884e+07	1.48551e+07	104.08	1.52	0.61	0.160528	0.79	0.408129	1.30092	213.075	82.4	1.4
M213T91	1.3193e+06	1.29412e+06	14.78	1.19825e+06	1.20278e+06	6.22	1.1	0.14	0.328205	0.48	0.600385	0.962075	213.016	90.7	1.5
M214T105	373829	212363	85.15	500392	313430	88.03	0.75	-0.42	0.505361	0.3	0.749981	0.37093	214.038	105.3	1.8
M214T115	600212	576049	56.76	613058	548856	72.27	0.98	-0.03	0.95913	0.02	0.985204	0.00399964	213.97	114.5	1.9
M214T137	1.45993e+06	1.34632e+06	26.67	1.62248e+06	1.63592e+06	15.49	0.9	-0.15	0.441803	0.35	0.702485	0.741354	214.001	137	2.3
M214T384	838972	831896	13.51	1.26546e+06	1.34105e+06	23.9	0.66	-0.59	0.0104118	1.98	0.0771942	1.76159	214.107	384.4	6.4
M214T412	755009	699507	32.59	732830	673559	43.78	1.03	0.04	0.573737	0.24	0.794466	0.267531	214.107	411.8	6.9
M214T464	470883	486003	36.6	610922	576382	24.14	0.77	-0.38	0.104895	0.98	0.317905	1.17676	214.18	464.2	7.7
M214T530	8.61008e+06	6.56933e+06	63.63	9.78235e+06	9.10269e+06	37.61	0.88	-0.18	0.505361	0.3	0.749981	0.612801	214.107	530.1	8.8
M214T570	4.94719e+07	5.10573e+07	20.55	4.12899e+07	4.398e+07	29.58	1.2	0.26	0.234499	0.63	0.504207	0.916722	214.123	570.2	9.5
M214T573	1.78726e+06	1.5185e+06	87.55	4.61117e+06	4.45011e+06	30.27	0.39	-1.37	0.0029526	2.53	0.0361958	1.62495	214.196	573.2	9.6
M214T598	1.85943e+07	2.16315e+07	32.77	1.52059e+07	1.15624e+07	40.6	1.22	0.29	0.194872	0.71	0.457172	0.560366	214.123	597.8	10
M214T619	282453	242614	47.27	323833	278264	49.13	0.87	-0.2	0.573737	0.24	0.794466	0.306618	213.637	619.1	10.3
M214T62	4.48096e+06	4.62725e+06	10.54	3.64135e+06	3.6038e+06	9.65	1.23	0.3	0.0029526	2.53	0.0361958	1.82365	214.001	61.6	1
M214T704	3.32964e+07	3.04828e+07	39.04	2.12143e+07	2.11353e+07	45.78	1.57	0.65	0.0649573	1.19	0.238167	1.28018	214.18	704.5	11.7
M214T705	32467.5	28877.5	28.34	28131.2	33371.4	46.82	1.15	0.21	0.720901	0.14	0.878065	0.646313	214.106	705.2	11.8
M214T774	2.43823e+07	2.50381e+07	37.26	2.38248e+07	2.41884e+07	16.9	1.02	0.03	0.878477	0.06	0.952443	0.16241	214.253	773.7	12.9
M214T789	1.21204e+07	1.02118e+07	55.94	1.52918e+07	1.62863e+07	26.89	0.79	-0.34	0.441803	0.35	0.702485	0.894516	214.253	789.4	13.2
M214T83	1.42146e+06	1.4959e+06	19.56	1.49659e+06	1.53089e+06	10.01	0.95	-0.07	0.720901	0.14	0.878065	0.532883	214.078	82.7	1.4
M214T96	1.16706e+07	1.0766e+07	21.32	8.7052e+06	1.00942e+07	47.73	1.34	0.42	0.234499	0.63	0.504207	1.08329	214.051	96.4	1.6
M215T114_1	1.02249e+07	1.01189e+07	12.66	5.74205e+06	5.47087e+06	12.67	1.78	0.83	0.0001554	3.81	0.00610078	2.30553	214.966	114.5	1.9
M215T114_2	6.18526e+06	6.61567e+06	69.4	5.87596e+06	5.66174e+06	42.9	1.05	0.07	0.95913	0.02	0.985204	0.301321	215.102	113.6	1.9
M215T122	3.59017e+07	3.85856e+07	22.98	2.45392e+07	1.62215e+07	68.56	1.46	0.55	0.160528	0.79	0.408129	1.31123	215.139	122.5	2
M215T124	2.94361e+06	2.74808e+06	48.84	2.56361e+06	2.82903e+06	55.59	1.15	0.2	0.505361	0.3	0.749981	0.413874	215.003	124.2	2.1
M215T127	670401	412436	67.31	1.0979e+06	1.17497e+06	33.25	0.61	-0.71	0.0649573	1.19	0.238167	1.18969	214.518	127.1	2.1
M215T137	6.85486e+06	6.63095e+06	23.76	7.42488e+06	7.39041e+06	20.46	0.92	-0.12	0.573737	0.24	0.794466	0.462205	215.003	137.1	2.3
M215T164	4.54766e+06	5.44886e+06	66.57	4.40359e+06	4.34329e+06	101.31	1.03	0.05	0.573737	0.24	0.794466	0.272684	215.139	163.7	2.7
M215T326	3.93761e+06	2.97284e+06	58.07	5.12922e+06	4.49213e+06	52.51	0.77	-0.38	0.160528	0.79	0.408129	0.755333	215.048	326.1	5.4
M215T333	2.68611e+06	2.72138e+06	33.5	2.69002e+06	2.79343e+06	22.79	1	0	0.878477	0.06	0.952443	0.116284	215.139	332.6	5.5
M215T530	666367	660044	42.8	717984	740531	53.69	0.93	-0.11	0.95913	0.02	0.985204	0.0970745	215.111	530.1	8.8
M215T570	7.7879e+06	8.04268e+06	29.5	7.32414e+06	6.5119e+06	33.66	1.06	0.09	0.798446	0.1	0.918313	0.336044	215.126	570.1	9.5
M215T573	1.81326e+06	1.98388e+06	23.09	1.12272e+06	1.00693e+06	52.73	1.62	0.69	0.0281274	1.55	0.141969	1.28835	214.53	573.1	9.6
M215T598	2.60192e+06	2.39967e+06	43.77	2.98123e+06	3.07951e+06	38.47	0.87	-0.2	0.645377	0.19	0.837808	0.343046	215.126	597.7	10
M215T704_1	2.5988e+06	2.5846e+06	47.83	1.84443e+06	2.18826e+06	56.03	1.41	0.49	0.194872	0.71	0.457172	0.811409	215.165	704.1	11.7
M215T704_2	4.24178e+06	3.62391e+06	45.27	3.87715e+06	3.51274e+06	23.95	1.09	0.13	0.95913	0.02	0.985204	0.167181	215.184	704.3	11.7
M215T722	542321	539002	23.8	443393	476887	18.62	1.22	0.29	0.0829837	1.08	0.275972	0.959648	215.164	722.4	12
M215T76	4.31223e+06	4.24604e+06	38.06	3.54003e+06	3.19637e+06	27.8	1.22	0.28	0.645377	0.19	0.837808	0.647146	215.087	75.7	1.3
M215T774	3.35024e+06	3.35699e+06	31.92	3.56369e+06	3.60583e+06	19.08	0.94	-0.09	0.573737	0.24	0.794466	0.445637	215.256	773.7	12.9
M215T82	3.37594e+06	3.27678e+06	24.14	1.01151e+07	8.71285e+06	38.72	0.33	-1.58	0.0001554	3.81	0.00610078	2.18563	214.85	82.1	1.4
M215T86	9.17234e+07	8.45929e+07	32.25	8.29421e+07	8.19949e+07	15.92	1.11	0.15	1	0	1	0.390126	215.069	86	1.4
M215T91	842203	855729	11.83	814578	798385	8.02	1.03	0.05	0.720901	0.14	0.878065	0.418993	215.043	90.8	1.5
M216T108	1.86783e+07	1.33738e+07	64.97	4.12453e+07	3.97271e+07	25.62	0.45	-1.14	0.0018648	2.73	0.0275628	1.85032	216.098	107.6	1.8
M216T109	2.43382e+06	2.58906e+06	51.28	2.81495e+06	2.93567e+06	60.5	0.86	-0.21	0.798446	0.1	0.918313	0.112927	216.122	109.2	1.8
M216T116	7.93089e+06	7.78974e+06	36.74	7.59831e+06	7.26648e+06	51.32	1.04	0.06	0.95913	0.02	0.985204	0.32694	216.087	115.9	1.9
M216T124	1.30211e+06	89374.4	142.65	48454.2	44146	89.77	26.87	4.75	0.0649573	1.19	0.238167	1.24647	216.142	123.7	2.1
M216T326	168744	171325	7.33	152945	152984	10.7	1.1	0.14	0.0829837	1.08	0.275972	1.25792	216.052	325.6	5.4
M216T334	320455	216895	61.79	350639	180584	86.9	0.91	-0.13	0.505361	0.3	0.749981	0.107873	216.196	334.1	5.6
M216T364	851844	944593	65.91	1.00975e+06	898273	98.24	0.84	-0.25	0.441803	0.35	0.702485	0.00596288	216.123	363.9	6.1
M216T368	1.26178e+06	1.01265e+06	61.07	6.77182e+06	3.22025e+06	135.98	0.19	-2.42	0.0003108	3.51	0.00894927	1.75704	216.087	368.1	6.1
M216T408	2419478	1.2139e+06	94.29	2.66997e+06	1.59658e+06	87.5	0.91	-0.14	0.328205	0.48	0.600385	0.278184	216.087	408.2	6.8
M216T570	350473	380733	28.65	307345	259495	40.38	1.14	0.19	0.328205	0.48	0.600385	0.540468	216.129	569.9	9.5
M216T592	403183	245633	97.39	499756	486334	66.04	0.81	-0.31	0.505361	0.3	0.749981	0.523118	216.196	592.3	9.9
M216T593	4.12093e+06	4.05349e+06	17.83	2.35912e+06	1.93525e+06	48.82	1.75	0.8	0.00699301	2.16	0.0602244	1.79554	216.159	592.6	9.9
M216T608	258169	249414	22.71	169237	170766	50.32	1.53	0.61	0.0104118	1.98	0.0771942	1.35395	216.069	608.4	10.1
M216T618	7.77161e+06	7.65421e+06	31.84	7.08973e+06	6.71293e+06	49.17	1.1	0.13	0.573737	0.24	0.794466	0.547825	216.102	618.2	10.3
M216T626	547050	475653	65.89	992161	941735	28.48	0.55	-0.86	0.0281274	1.55	0.141969	1.39489	215.587	626.3	10.4
M216T655	2.06363e+07	2.02512e+07	32.34	1.82869e+07	1.51823e+07	65.6	1.13	0.17	0.505361	0.3	0.749981	0.640264	216.196	655.4	10.9
M216T699	3.048e+06	3.25547e+06	48.6	4.44679e+06	4.79097e+06	22.89	0.69	-0.54	0.0649573	1.19	0.238167	1.21587	216.159	698.9	11.6
M216T712	77748.5	81214.3	40.61	57562.7	53929.8	25.25	1.35	0.43	0.505361	0.3	0.749981	0.942315	216.102	711.9	11.9
M216T72	2.31436e+06	2.24071e+06	18.18	2.30356e+06	2.22968e+06	20.19	1	0.01	0.95913	0.02	0.985204	0.0984014	215.994	72.2	1.2
M216T76	787803	851154	48.69	1.14233e+06	1.16362e+06	36.95	0.69	-0.54	0.0829837	1.08	0.275972	0.900095	216.09	75.6	1.3
M216T799	1.31834e+06	1.29901e+06	27.54	1.54661e+06	1.46098e+06	18.72	0.85	-0.23	0.194872	0.71	0.457172	0.936861	216.138	798.8	13.3
M216T85	6.59176e+06	6.4788e+06	9.81	6.87159e+06	6.67963e+06	20	0.96	-0.06	0.95913	0.02	0.985204	0.268388	216.063	85.3	1.4
M216T86	3.56542e+06	3.72842e+06	30.58	3.31805e+06	3.08339e+06	50.56	1.07	0.1	0.382284	0.42	0.64771	0.336009	216.074	86	1.4
M217T108	2.45497e+06	2.43533e+06	19.94	2.27471e+06	1.98815e+06	41.43	1.08	0.11	0.278632	0.55	0.551712	0.525608	217.102	107.6	1.8
M217T109	8.97506e+06	9.9092e+06	34.38	1.19877e+07	1.16111e+07	31.52	0.75	-0.42	0.104895	0.98	0.317905	0.935006	217.064	109.2	1.8
M217T114	727934	644432	30.32	503701	485738	15.58	1.45	0.53	0.004662	2.33	0.0475536	1.58535	216.963	114.4	1.9
M217T118	344083	157317	142.9	927128	859763	91.07	0.37	-1.43	0.0649573	1.19	0.238167	0.795701	217.102	117.9	2
M217T323	881062	897536	25.66	728550	654469	48.13	1.21	0.27	0.278632	0.55	0.551712	0.820122	217.154	322.8	5.4
M217T354	1.45637e+07	1.40772e+07	28.46	1.37649e+07	1.17669e+07	45.14	1.06	0.08	0.645377	0.19	0.837808	0.397361	217.105	353.5	5.9
M217T368	762365	733144	50.63	607331	548117	28.1	1.26	0.33	0.328205	0.48	0.600385	0.353417	217.09	368.1	6.1
M217T440	861245	889745	20.68	451476	490996	40.63	1.91	0.93	0.000621601	3.21	0.0140919	1.64603	217.097	440.2	7.3
M217T517	3.6502e+07	40711584	44.71	3.72106e+07	3.18809e+07	69.76	0.98	-0.03	0.573737	0.24	0.794466	0.0417307	217.191	516.8	8.6
M217T557	1.39002e+07	1.53442e+07	51.23	1.10918e+07	6.08964e+06	77.09	1.25	0.33	0.278632	0.55	0.551712	0.667413	217.107	557.4	9.3
M217T592	296701	268590	53.4	257268	262162	31.79	1.15	0.21	0.878477	0.06	0.952443	0.217596	217.162	592.5	9.9
M217T618	2.96498e+06	3.05135e+06	18.27	2.43888e+06	2.47258e+06	26	1.22	0.28	0.104895	0.98	0.317905	1.10532	217.105	618.2	10.3
M217T655	3.00434e+06	2.34744e+06	53.24	3.99394e+06	4.10848e+06	37.75	0.75	-0.41	0.160528	0.79	0.408129	0.8634	217.199	655.5	10.9
M217T699	109990	101853	52.36	394874	363054	52.79	0.28	-1.84	0.00699301	2.16	0.0602244	1.59634	217.163	698.8	11.6
M217T72	1.05394e+07	1.09976e+07	31.4	1.06405e+07	1.1053e+07	46.38	0.99	-0.01	0.878477	0.06	0.952443	0.13229	216.95	72	1.2
M217T727	1.4253e+06	1.45818e+06	30	1.17657e+06	1.11674e+06	40.79	1.21	0.28	0.278632	0.55	0.551712	0.812426	217.122	727	12.1
M217T728	453261	411287	32.41	557498	555341	29.09	0.81	-0.3	0.130381	0.88	0.362517	0.844694	217.143	728	12.1
M217T740	1.0008e+06	951308	30.35	1.22205e+06	1.22568e+06	62.27	0.82	-0.29	0.505361	0.3	0.749981	0.0652706	217.159	740.1	12.3
M217T748	4.61032e+06	4.46415e+06	24.72	4.88792e+06	4.87068e+06	18.91	0.94	-0.08	0.798446	0.1	0.918313	0.383531	217.122	747.6	12.5
M217T76	763361	777585	22.43	733123	732441	11.68	1.04	0.06	0.505361	0.3	0.749981	0.112307	217.085	75.6	1.3
M217T786	8.23681e+06	7.9654e+06	38.52	7.26915e+06	6.95501e+06	20.54	1.13	0.18	0.645377	0.19	0.837808	0.342054	217.122	786.5	13.1
M217T86	3.90175e+06	3.76893e+06	17.73	2.62017e+06	2.6081e+06	5.98	1.49	0.57	0.0001554	3.81	0.00610078	2.10809	217.065	85.9	1.4
M217T98	1.12394e+06	1.2257e+06	67.24	1.76195e+06	1.76741e+06	19.48	0.64	-0.65	0.234499	0.63	0.504207	1.20029	217.082	98.1	1.6
M218T104	8.66495e+06	8.85026e+06	37.18	6.6093e+06	5.64327e+06	73.58	1.31	0.39	0.328205	0.48	0.600385	0.924902	218.113	104.2	1.7
M218T109	581417	550395	20.2	428392	436304	15.77	1.36	0.44	0.0104118	1.98	0.0771942	1.67156	218.067	109	1.8
M218T113	1.78281e+06	1.81448e+06	39.15	2.69961e+06	1.5582e+06	94.31	0.66	-0.6	0.878477	0.06	0.952443	0.406444	218.122	113.3	1.9
M218T121	8.38097e+07	6.35553e+07	54.15	8.72722e+07	5.56558e+07	85.9	0.96	-0.06	0.505361	0.3	0.749981	0.213161	218.102	121.2	2
M218T122	1.263e+07	1.18956e+07	37.8	1.10304e+07	8.3426e+06	56.42	1.15	0.2	0.382284	0.42	0.64771	0.566256	218.139	121.9	2
M218T236	5.69151e+07	1.53805e+07	116.42	1.08387e+08	8.03679e+07	85.36	0.53	-0.93	0.130381	0.88	0.362517	1.04799	218.139	236.2	3.9
M218T253	4.63636e+07	4.80733e+07	9.98	4.42537e+07	4.43876e+07	15.09	1.05	0.07	0.645377	0.19	0.837808	0.525682	218.139	253.1	4.2
M218T277	6.62487e+07	5.44929e+07	46.81	5.6883e+07	6.22765e+07	49.1	1.16	0.22	0.95913	0.02	0.985204	0.584975	218.139	277.5	4.6
M218T353	1.06119e+06	900932	54.41	901692	964252	18.93	1.18	0.23	0.878477	0.06	0.952443	0.278841	218.109	353.3	5.9
M218T422	402077	437750	37.47	415690	428429	61.1	0.97	-0.05	0.878477	0.06	0.952443	0.323259	218.084	421.9	7
M218T423	621152	625812	56.17	659666	635968	24.4	0.94	-0.09	0.798446	0.1	0.918313	0.505437	218.048	423.2	7.1
M218T517	2.47777e+06	2.81073e+06	52.23	2.58337e+06	2.8151e+06	49.4	0.96	-0.06	0.878477	0.06	0.952443	0.0996722	218.194	516.9	8.6
M218T575	3.79197e+07	4.31482e+07	51.21	1.86187e+07	1.73985e+07	48.85	2.04	1.03	0.0498834	1.3	0.201689	1.32442	218.211	575.5	9.6
M218T589	2.00591e+06	2.33763e+06	46.47	2.37187e+06	2.15938e+06	53.54	0.85	-0.24	0.645377	0.19	0.837808	0.40921	218.211	589.5	9.8
M218T646	146267	138031	47.29	157599	112812	58.58	0.93	-0.11	0.95913	0.02	0.985204	0.0924282	218.175	646.4	10.8
M218T69	1.05903e+06	1.03148e+06	54.37	1.36222e+06	1.26216e+06	59.82	0.78	-0.36	0.573737	0.24	0.794466	0.265391	218.186	69.2	1.2
M218T786	1.06461e+06	974277	35.42	936148	815495	29.25	1.14	0.19	0.505361	0.3	0.749981	0.476859	218.125	786.5	13.1
M218T83	1.94145e+06	1.85626e+06	35.72	1.02152e+06	922197	38.7	1.9	0.93	0.004662	2.33	0.0475536	1.71629	217.938	82.8	1.4
M219T102	733449	817177	27.9	935295	979796	10.57	0.78	-0.35	0.0029526	2.53	0.0361958	1.16653	219.061	101.7	1.7
M219T104	611713	637144	15.21	618533	566819	44.47	0.99	-0.02	0.95913	0.02	0.985204	0.322145	219.117	104.2	1.7
M219T113	3.37707e+06	3.31734e+06	39.13	1.01478e+06	980477	28.52	3.33	1.73	0.0003108	3.51	0.00894927	2.12532	219.134	112.7	1.9
M219T122	6.69051e+06	4.88418e+06	80.38	1.00721e+07	1.20194e+07	55.32	0.66	-0.59	0.441803	0.35	0.702485	0.64946	219.097	121.6	2
M219T139	1.19977e+06	894563	49.59	562644	535694	68.09	2.13	1.09	0.0206682	1.68	0.117429	1.46436	219.097	139.3	2.3
M219T277	8.69534e+06	9.12122e+06	18.96	3.05987e+06	1.23192e+06	98.57	2.84	1.51	0.0018648	2.73	0.0275628	1.79691	219.142	277.1	4.6
M219T354	1.31378e+06	1.35601e+06	52.87	1.71727e+06	1.93253e+06	34.6	0.77	-0.39	0.160528	0.79	0.408129	0.78751	219.134	353.5	5.9
M219T475	728811	727661	21.35	546165	597779	36.3	1.33	0.42	0.0649573	1.19	0.238167	1.03558	219.113	475.3	7.9
M219T573_1	301729	261376	44.09	296215	322600	24.08	1.02	0.03	0.573737	0.24	0.794466	0.136848	219.065	572.9	9.5
M219T573_2	1.10248e+06	1.123e+06	20.5	838267	861916	46.38	1.32	0.4	0.130381	0.88	0.362517	0.920161	219.138	573.1	9.6
M219T575	2.66849e+06	2.54353e+06	52.29	2.96101e+06	2.79929e+06	45.2	0.9	-0.15	0.798446	0.1	0.918313	0.300372	219.215	575.5	9.6
M219T64	1.33694e+06	996470	108.39	959957	1.04026e+06	42.52	1.39	0.48	0.720901	0.14	0.878065	0.16265	219.174	64	1.1
M219T658	1.92626e+06	917457	111.96	2.41445e+06	1.66632e+06	75.26	0.8	-0.33	0.104895	0.98	0.317905	0.717436	219.174	657.9	11
M219T691	7.06603e+06	6.32838e+06	51.06	7.30531e+06	6.90251e+06	35.21	0.97	-0.05	0.720901	0.14	0.878065	0.251989	219.174	691.1	11.5
M219T72	1.4606e+07	1.48707e+07	29.8	1.15105e+07	1.1865e+07	20.18	1.27	0.34	0.0498834	1.3	0.201689	0.809804	218.983	71.7	1.2
M219T740	2.60915e+06	2.89647e+06	36.92	3.15915e+06	3.28199e+06	38.93	0.83	-0.28	0.278632	0.55	0.551712	0.603468	219.138	740.2	12.3
M219T749	1.1867e+06	988478	68.51	1.04562e+06	985064	40.76	1.13	0.18	0.95913	0.02	0.985204	0.0481538	219.138	749	12.5
M219T767	358882	343072	55.76	904480	1.0674e+06	57.96	0.4	-1.33	0.0379176	1.42	0.171246	1.43008	219.095	767.4	12.8
M219T792	1.83212e+06	2.05711e+06	40.3	1.7671e+06	1.76169e+06	26.1	1.04	0.05	0.573737	0.24	0.794466	0.0951242	219.138	791.7	13.2
M219T816	3.10035e+06	3.52672e+06	41.97	2.9571e+06	3.0242e+06	28.95	1.05	0.07	0.573737	0.24	0.794466	0.0910563	219.174	816	13.6
M219T82	4.75973e+06	4.75074e+06	22.09	1.49807e+07	1.3865e+07	38.88	0.32	-1.65	0.0001554	3.81	0.00610078	2.20926	219.083	82.1	1.4
M219T88	1.78036e+06	1.73374e+06	16.51	2.26631e+06	2.29158e+06	14.67	0.79	-0.35	0.014763	1.83	0.0952789	1.54466	219.005	88.5	1.5
M220T102	2.50004e+07	2.52795e+07	21.65	1.76089e+07	1.78851e+07	21.5	1.42	0.51	0.0104118	1.98	0.0771942	1.64644	220.118	102	1.7
M220T112	2.29722e+06	1.63138e+06	102.48	211514	111313	139.32	10.86	3.44	0.004662	2.33	0.0475536	1.56812	220.129	112.4	1.9
M220T223	1.84857e+06	1.16469e+06	100.69	3.02843e+06	2.72506e+06	45.36	0.61	-0.71	0.160528	0.79	0.408129	1.21802	220.082	222.7	3.7
M220T356_1	612872	638914	43.37	915834	606752	76.43	0.67	-0.58	0.720901	0.14	0.878065	0.621471	219.925	356.4	5.9
M220T356_2	1.79308e+09	1.98475e+09	44.18	1.38815e+09	1.55916e+09	56.3	1.29	0.37	0.328205	0.48	0.600385	0.587712	220.118	356.4	5.9
M220T356_3	681387	649999	27.85	507241	443482	49.92	1.34	0.43	0.194872	0.71	0.457172	0.939062	220.311	356.4	5.9
M220T368	245561	255272	10.2	260314	268787	12.88	0.94	-0.08	0.234499	0.63	0.504207	0.572601	220.17	368.5	6.1
M220T429	818651	907994	53.21	563939	610748	68.49	1.45	0.54	0.278632	0.55	0.551712	0.822406	220.064	429.4	7.2
M220T487	409496	353209	63.38	359656	292569	61.63	1.14	0.19	0.573737	0.24	0.794466	0.150877	220.064	486.7	8.1
M220T533	2.41292e+06	2.02649e+06	41.75	410003	208526	108.51	5.89	2.56	0.0003108	3.51	0.00894927	2.07604	220.097	533.1	8.9
M220T555	8.279e+06	6.01012e+06	44.4	1.19445e+07	1.1949e+07	40.57	0.69	-0.53	0.194872	0.71	0.457172	1.02185	220.136	554.8	9.2
M220T612	293816	228259	48.74	300889	300512	28.98	0.98	-0.03	0.573737	0.24	0.794466	0.253291	220.131	611.5	10.2
M220T691	631750	620429	57.9	1.31535e+06	1.3202e+06	24.5	0.48	-1.06	0.0029526	2.53	0.0361958	1.6412	220.177	691.1	11.5
M220T72	4.31759e+06	3.93832e+06	39.51	3.38003e+06	3.6001e+06	28	1.28	0.35	0.441803	0.35	0.702485	0.966583	219.984	71.8	1.2
M220T91	525797	583672	39.56	456784	537952	70.62	1.15	0.2	0.720901	0.14	0.878065	0.613561	220.025	90.8	1.5
M220T99	1.2068e+07	1.19297e+07	34.27	1.29754e+07	1.22385e+07	34.09	0.93	-0.1	0.645377	0.19	0.837808	0.257317	220.081	98.6	1.6
M221T102	710621	246188	132.57	2.04012e+06	2.01269e+06	48.93	0.35	-1.52	0.014763	1.83	0.0952789	1.61761	221.114	102.2	1.7
M221T110	1.21941e+07	1.23323e+07	47.29	1.34201e+07	1.20639e+07	36.57	0.91	-0.14	1	0	1	0.47704	221.059	109.8	1.8
M221T114	1.728e+06	1.66536e+06	36.23	734708	740265	45.6	2.35	1.23	0.0029526	2.53	0.0361958	1.74649	221.013	114.3	1.9
M221T121	2.25418e+07	2.06202e+07	62.06	1.9237e+07	2.06763e+07	48.06	1.17	0.23	1	0	1	0.194384	221.059	120.9	2
M221T246	1.64713e+06	1.64886e+06	5.75	1.42187e+06	1.43434e+06	11.5	1.16	0.21	0.0029526	2.53	0.0361958	1.57465	221.092	245.6	4.1
M221T289	85229.1	68842.2	63.87	142091	141703	37.92	0.6	-0.74	0.0829837	1.08	0.275972	1.29943	221.067	288.7	4.8
M221T347	2.68852e+06	2.09474e+06	79.74	2.09199e+07	1.37005e+07	101.71	0.13	-2.96	0.0003108	3.51	0.00894927	1.99324	221.092	347.4	5.8
M221T356	1.9518e+08	2.01861e+08	13.73	1.58954e+08	1.58779e+08	5.99	1.23	0.3	0.00699301	2.16	0.0602244	1.7243	221.121	356.4	5.9
M221T378	1.24322e+06	1.21643e+06	30.42	733890	774389	59.99	1.69	0.76	0.0379176	1.42	0.171246	1.3083	221.09	377.6	6.3
M221T388	3.74614e+07	4.15751e+07	30.35	3.44612e+07	3.62629e+07	35.04	1.09	0.12	0.720901	0.14	0.878065	0.32676	221.17	387.9	6.5
M221T394	1.48276e+06	1.41145e+06	23.08	696557	659841	35.94	2.13	1.09	0.0003108	3.51	0.00894927	2.06277	221.103	394.1	6.6
M221T397	2.5293e+06	2.08724e+06	53.05	3.51417e+06	2.84043e+06	66.51	0.72	-0.47	0.278632	0.55	0.551712	0.778371	221.092	397.4	6.6
M221T533	261526	280491	39.13	211856	218910	27.83	1.23	0.3	0.328205	0.48	0.600385	0.537566	221.101	533	8.9
M221T593	9.80008e+06	6.57555e+06	66	1.04226e+07	1.06526e+07	51.99	0.94	-0.09	0.95913	0.02	0.985204	0.226	221.174	592.8	9.9
M221T708	276772	105896	133.09	1.01399e+06	767544	64.35	0.27	-1.87	0.014763	1.83	0.0952789	1.67724	221.074	707.9	11.8
M221T749	1.49095e+06	1.38353e+06	40.81	1.19205e+06	1.14139e+06	38.51	1.25	0.32	0.441803	0.35	0.702485	0.633151	221.117	749.2	12.5
M221T774	710798	826792	48.18	1.02747e+06	929858	21.05	0.69	-0.53	0.104895	0.98	0.317905	1.26593	221.154	773.9	12.9
M222T101_1	500592	485632	9.24	496256	490935	9.52	1.01	0.01	0.798446	0.1	0.918313	0.0942064	222.079	100.5	1.7
M222T101_2	2.98962e+06	2.30664e+06	58.44	5.31264e+06	3.38192e+06	77.79	0.56	-0.83	0.104895	0.98	0.317905	0.965699	222.113	101	1.7
M222T110	1.73936e+07	1.70094e+07	13.76	1.0549e+07	1.06534e+07	21.6	1.65	0.72	0.0001554	3.81	0.00610078	2.04555	222.043	109.6	1.8
M222T122	2.09122e+07	2.05903e+07	12.48	1.34712e+07	1.27735e+07	21.48	1.55	0.63	0.000621601	3.21	0.0140919	1.97484	222.043	122.1	2
M222T302	343233	240650	94.02	217230	85515	108.53	1.58	0.66	0.328205	0.48	0.600385	0.635099	222.123	301.5	5
M222T315	264441	251626	62.59	27930.7	9635.37	130.84	9.47	3.24	0.0010878	2.96	0.0203124	1.96377	222.043	314.5	5.2
M222T335	3.22391e+07	3.49158e+07	66.57	6.5822e+06	6.70832e+06	15.17	4.9	2.29	0.0018648	2.73	0.0275628	1.82844	222.112	334.6	5.6
M222T347	1.23239e+06	1.30469e+06	57.85	214215	132973	127.75	5.75	2.52	0.0018648	2.73	0.0275628	1.82186	222.095	347.4	5.8
M222T356	1.89677e+07	1.59805e+07	48.38	4.72575e+07	4.29323e+07	64.63	0.4	-1.32	0.0281274	1.55	0.141969	1.50031	222.123	356.4	5.9
M222T376	1.1468e+07	1.20752e+07	25.43	1.19302e+07	1.21157e+07	11.69	0.96	-0.06	1	0	1	0.403938	222.112	376.4	6.3
M222T388_1	7.38424e+06	8.05933e+06	37.83	6.94362e+06	7.66022e+06	37.49	1.06	0.09	0.720901	0.14	0.878065	0.156108	221.671	387.9	6.5
M222T424	4.80716e+06	4.25777e+06	35.89	3.89225e+06	3.56212e+06	71.68	1.24	0.3	0.328205	0.48	0.600385	0.771954	222.149	424.5	7.1
M222T432	681092	623441	42.06	786765	606458	59.38	0.87	-0.21	1	0	1	0.10461	222.079	432.3	7.2
M222T473	1.59901e+06	1.40207e+06	40.18	1.54258e+06	1.60177e+06	31.82	1.04	0.05	0.95913	0.02	0.985204	0.104387	222.149	473.4	7.9
M222T555	595027	403990	74.34	835735	831409	64.59	0.71	-0.49	0.382284	0.42	0.64771	0.548001	222.132	554.7	9.2
M222T571	535891	462598	45.96	358307	344846	43.57	1.5	0.58	0.104895	0.98	0.317905	1.12162	222.16	570.7	9.5
M222T593	2.92679e+06	2.72971e+06	26.84	1.39604e+06	1.15729e+06	49.42	2.1	1.07	0.0029526	2.53	0.0361958	1.92659	222.178	592.6	9.9
M222T619	659279	630490	47.13	509476	275055	76.37	1.29	0.37	0.234499	0.63	0.504207	0.813893	222.15	618.7	10.3
M222T621	1.52399e+08	1.46218e+08	43.39	1.32444e+08	1.28606e+08	34.86	1.15	0.2	0.720901	0.14	0.878065	0.301353	222.185	621.4	10.4
M222T674	302709	303417	58.55	613170	577227	46.76	0.49	-1.02	0.0104118	1.98	0.0771942	1.44141	222.076	673.9	11.2
M222T677	397308	275646	75.59	811553	752916	51.82	0.49	-1.03	0.0379176	1.42	0.171246	1.38984	221.685	677	11.3
M222T737	957761	918393	53.27	714889	821128	34.5	1.34	0.42	0.194872	0.71	0.457172	0.595045	222.17	737.4	12.3
M222T83	3.32478e+07	3.17891e+07	24.42	4.12102e+07	3.96693e+07	16.07	0.81	-0.31	0.0281274	1.55	0.141969	1.29519	222.029	83.4	1.4
M222T91	1.54036e+07	1.55281e+07	2.79	1.36258e+07	1.57299e+07	29.15	1.13	0.18	0.573737	0.24	0.794466	0.866687	222.097	91	1.5
M222T98	1.72024e+07	1.49349e+07	31.12	1.73066e+07	1.74095e+07	33.06	0.99	-0.01	1	0	1	0.0782437	222.054	98.3	1.6
M223T104_1	639502	691076	52.08	995063	966163	14.34	0.64	-0.64	0.0281274	1.55	0.141969	1.40774	222.998	103.6	1.7
M223T104_2	915787	963993	15.71	1.32044e+06	1.32092e+06	37.12	0.69	-0.53	0.0498834	1.3	0.201689	1.33998	223.075	104.1	1.7
M223T113	1.50439e+06	1.45633e+06	62.28	489569	503554	42.83	3.07	1.62	0.00699301	2.16	0.0602244	1.26598	223.116	113	1.9
M223T127	5.21591e+06	5.45582e+06	33.45	4.16532e+06	4.35666e+06	28.12	1.25	0.32	0.0829837	1.08	0.275972	0.556565	222.504	126.8	2.1
M223T309	1.9887e+06	1.82807e+06	52.4	1.72755e+06	1.24383e+06	80.45	1.15	0.2	0.382284	0.42	0.64771	0.525202	222.971	308.8	5.1
M223T33	1.64765e+06	1.64517e+06	11.97	1.73651e+06	1.78834e+06	18.61	0.95	-0.08	0.382284	0.42	0.64771	0.279005	222.903	33.2	0.6
M223T356	1.42885e+06	1.31915e+06	17.03	1.73389e+06	1.68342e+06	15.7	0.82	-0.28	0.014763	1.83	0.0952789	1.39034	223.125	356.4	5.9
M223T361	372586	205650	150.78	380247	296947	109.16	0.98	-0.03	0.382284	0.42	0.64771	0.631129	223.082	360.8	6
M223T376	1.06869e+06	942102	67.06	1.60777e+06	1.52521e+06	58.39	0.66	-0.59	0.130381	0.88	0.362517	0.571151	223.116	376.3	6.3
M223T395	1.92117e+06	1.5588e+06	101.73	119280	162874	65.31	16.11	4.01	0.0281274	1.55	0.141969	1.36647	223.107	395.3	6.6
M223T439	1.50315e+07	1.34017e+07	48.57	2.67511e+06	2.00381e+06	70.64	5.62	2.49	0.0001554	3.81	0.00610078	2.16237	223.154	439.2	7.3
M223T61	1.65767e+06	1.42455e+06	68.42	1.30282e+06	945350	73.97	1.27	0.35	0.645377	0.19	0.837808	0.405329	222.903	61.5	1
M223T621	1.97984e+07	1.6472e+07	55.82	2.13924e+07	2.27299e+07	51.46	0.93	-0.11	0.878477	0.06	0.952443	0.103672	223.188	621.4	10.4
M223T712	2.60386e+06	2.04108e+06	54.4	2.1703e+06	2.2798e+06	37.74	1.2	0.26	0.798446	0.1	0.918313	0.439122	223.133	711.5	11.9
M223T719	3.80338e+06	3.30561e+06	28.61	2.64772e+06	2.6915e+06	28.98	1.44	0.52	0.0281274	1.55	0.141969	1.39316	223.133	719	12
M223T72	1.2055e+06	1.23523e+06	45.75	1.85566e+06	1.7544e+06	44.65	0.65	-0.62	0.104895	0.98	0.317905	0.910581	222.92	71.8	1.2
M223T739	898175	732147	61.72	1.22084e+06	1.21958e+06	22.57	0.74	-0.44	0.234499	0.63	0.504207	1.10832	223.096	738.9	12.3
M223T759	2.58291e+07	1.86728e+07	58.03	2.24276e+07	1.28119e+07	83.28	1.15	0.2	0.505361	0.3	0.749981	0.558197	223.064	758.7	12.6
M223T768	1.30088e+06	1.18583e+06	46	797703	702724	46.84	1.63	0.71	0.130381	0.88	0.362517	1.14069	223.133	767.8	12.8
M223T785	577041	546265	38.14	572509	529753	57.99	1.01	0.01	0.878477	0.06	0.952443	0.268797	223.096	784.9	13.1
M223T79	1.21092e+07	1.19801e+07	12.33	1.14123e+07	1.15893e+07	6.65	1.06	0.09	0.382284	0.42	0.64771	0.718911	223.024	78.9	1.3
M224T101	1.83512e+07	1.54283e+07	60.86	1.9726e+07	1.68946e+07	53.46	0.93	-0.1	0.720901	0.14	0.878065	0.175938	224.127	100.9	1.7
M224T114	2.49713e+07	2.56108e+07	6.74	2.42183e+07	2.38887e+07	3.76	1.03	0.04	0.130381	0.88	0.362517	0.616036	224.128	114.1	1.9
M224T151	3.4259e+06	2.84374e+06	62.61	5.6514e+06	5.67994e+06	45.58	0.61	-0.72	0.104895	0.98	0.317905	1.03157	224.039	151.3	2.5
M224T281	65608698	6.25847e+07	15.37	8.36756e+07	8.42966e+07	34.92	0.78	-0.35	0.0379176	1.42	0.171246	0.616076	224.128	281	4.7
M224T302	675573	668821	17.21	818428	656580	64.99	0.83	-0.28	1	0	1	0.128912	224.185	302.1	5
M224T320	3.30079e+06	3.4666e+06	15.1	3.49146e+06	3.44648e+06	13.06	0.95	-0.08	0.573737	0.24	0.794466	0.518064	224.078	320.2	5.3
M224T329	956189	990729	24.18	421913	376443	57.87	2.27	1.18	0.0018648	2.73	0.0275628	1.84009	224.078	329.1	5.5
M224T348	1.03114e+06	62708.9	178.4	1.93381e+06	1111754	106.91	0.53	-0.91	0.0829837	1.08	0.275972	1.13672	224.092	347.7	5.8
M224T356	1.83855e+06	1.72852e+06	49.69	978782	943268	33.32	1.88	0.91	0.0498834	1.3	0.201689	1.32687	224.078	356.1	5.9
M224T363	490851	462439	48.09	1.08681e+06	963489	34.05	0.45	-1.15	0.0018648	2.73	0.0275628	1.80256	224.111	363.3	6.1
M224T372	498300	429682	44.54	1.08981e+06	768379	94.8	0.46	-1.13	0.104895	0.98	0.317905	1.08671	224.149	372	6.2
M224T39	9.26098e+06	7.53022e+06	62.36	7.12393e+06	6.61941e+06	25.13	1.3	0.38	0.328205	0.48	0.600385	0.710173	224.126	38.6	0.6
M224T409	545604	589777	61.85	422583	332492	72.32	1.29	0.37	0.573737	0.24	0.794466	0.395764	224.091	409.3	6.8
M224T415	697609	706811	35.44	411310	433572	23.42	1.7	0.76	0.014763	1.83	0.0952789	1.57835	224.185	414.9	6.9
M224T428	770012	745904	16.53	657620	620708	26.44	1.17	0.23	0.160528	0.79	0.408129	1.03396	224.091	428	7.1
M224T439	894363	927831	26.32	625556	403392	90.33	1.43	0.52	0.0649573	1.19	0.238167	1.26462	224.157	439.2	7.3
M224T491	247361	242939	20.75	191951	144084	40.1	1.29	0.37	0.160528	0.79	0.408129	1.15515	224.074	491.1	8.2
M224T576	5.16316e+06	4.57457e+06	79.85	1.12901e+07	1.19394e+07	40.53	0.46	-1.13	0.014763	1.83	0.0952789	1.43379	224.124	576.1	9.6
M224T582	219787	72430.8	114.49	15476.3	10586.4	80.66	14.2	3.83	0.0018648	2.73	0.0275628	1.79517	224.047	581.9	9.7
M224T594	381183	355475	30.95	319659	337401	58.32	1.19	0.25	0.645377	0.19	0.837808	0.751861	224.164	594.2	9.9
M224T596	851471	849527	46.95	649821	653506	27.18	1.31	0.39	0.328205	0.48	0.600385	0.600295	224.185	596.4	9.9
M224T60	1.99675e+06	2.19117e+06	54	3.95602e+06	3.87336e+06	58.16	0.5	-0.99	0.130381	0.88	0.362517	0.935178	223.902	60.4	1
M224T621	1.04614e+06	991378	37.61	1.29356e+06	1.03685e+06	70.45	0.81	-0.31	1	0	1	0.0596183	224.192	621.4	10.4
M224T64	2.85217e+07	2.10572e+07	95.49	1.67773e+07	1.47572e+07	65.49	1.7	0.77	0.573737	0.24	0.794466	0.226127	224.126	64	1.1
M224T705	1.77292e+06	1.35696e+06	55.54	775911	707836	57.39	2.28	1.19	0.0206682	1.68	0.117429	1.47484	224.091	705.1	11.8
M224T712	4.52405e+06	3.99388e+06	55.1	6.00654e+06	6.43199e+06	29.78	0.75	-0.41	0.194872	0.71	0.457172	0.952895	224.135	711.6	11.9
M224T72	4.80287e+07	4.87808e+07	12.47	4.46548e+07	4.48468e+07	12.44	1.08	0.11	0.234499	0.63	0.504207	0.716863	223.991	71.6	1.2
M224T759	5.78963e+06	4.39256e+06	81.43	3.42304e+06	2.91186e+06	74.2	1.69	0.76	0.382284	0.42	0.64771	0.68498	224.063	758.7	12.6
M224T769	7.67071e+06	7.26598e+06	34.9	6.37122e+06	6.46306e+06	32.16	1.2	0.27	0.573737	0.24	0.794466	0.647072	224.128	768.8	12.8
M224T804	3.03428e+08	3.08437e+08	28.83	3.20151e+08	3.04373e+08	21.91	0.95	-0.08	0.878477	0.06	0.952443	0.411258	223.989	803.5	13.4
M224T83	1.95411e+06	2.15333e+06	41.39	2.00905e+06	1.95271e+06	18.45	0.97	-0.04	0.720901	0.14	0.878065	0.426567	223.946	82.5	1.4
M224T838	3.56838e+07	3.138e+07	52.71	4.38406e+07	5.08226e+07	34.53	0.81	-0.3	0.382284	0.42	0.64771	0.705945	223.988	838.3	14
M224T86	1.32236e+07	5.76385e+06	98.33	1.04147e+07	7.63927e+06	97.88	1.27	0.34	0.645377	0.19	0.837808	0.0885723	223.999	86.4	1.4
M224T99_1	1.29058e+06	1.11815e+06	88.9	1.53396e+06	1.32582e+06	29.39	0.84	-0.25	0.645377	0.19	0.837808	0.949272	224.05	98.5	1.6
M224T99_2	5.18373e+07	5.94981e+07	53.47	7.76345e+07	8.05434e+07	15.25	0.67	-0.58	0.0379176	1.42	0.171246	1.29484	224.113	99.2	1.7
M225T102	2.03642e+06	2.19081e+06	52.8	3.46705e+06	3.57041e+06	32.26	0.59	-0.77	0.0379176	1.42	0.171246	1.36642	225.131	101.6	1.7
M225T106	543541	506955	39.87	345461	339247	41.44	1.57	0.65	0.0649573	1.19	0.238167	1.25466	224.56	106.4	1.8
M225T109	2.74751e+06	2.88031e+06	39.81	3.11547e+06	3.44823e+06	38.52	0.88	-0.18	0.573737	0.24	0.794466	0.445647	224.927	108.7	1.8
M225T281	3.42202e+06	4.33892e+06	70.52	4.262e+06	5.09189e+06	44.55	0.8	-0.32	0.328205	0.48	0.600385	0.670211	225.128	281.2	4.7
M225T287	4.90852e+06	5.06741e+06	24.66	4.55859e+06	4.41416e+06	10.3	1.08	0.11	0.573737	0.24	0.794466	0.347604	224.899	287.4	4.8
M225T308	2.48054e+06	2.15713e+06	26.97	2.69639e+06	2.69819e+06	18.79	0.92	-0.12	0.382284	0.42	0.64771	0.53746	224.988	308.3	5.1
M225T344	917613	964610	39.31	1.00528e+06	1.01817e+06	45.66	0.91	-0.13	0.720901	0.14	0.878065	0.192313	225.196	343.9	5.7
M225T377	872950	804035	29.04	877189	836224	29.59	1	-0.01	0.798446	0.1	0.918313	0.0185461	225.087	377.3	6.3
M225T413	1.134e+07	1.14005e+07	36.37	4.02716e+06	3.50393e+06	60.93	2.82	1.49	0.0010878	2.96	0.0203124	1.85064	225.124	413.3	6.9
M225T470	368112	359994	36.63	179175	186502	20.73	2.05	1.04	0.004662	2.33	0.0475536	1.83398	225.076	469.9	7.8
M225T552	413420	378535	46	774777	836669	40.08	0.53	-0.91	0.014763	1.83	0.0952789	1.44728	225.06	551.7	9.2
M225T602	316074	277773	47.92	282693	272157	31.77	1.12	0.16	0.95913	0.02	0.985204	0.256042	225.16	602.5	10
M225T62	1.67168e+07	1.7302e+07	11.86	1.84255e+07	1.91215e+07	19.14	0.91	-0.14	0.234499	0.63	0.504207	0.687731	224.897	61.7	1
M225T626	315234	335463	26.56	329982	306146	23.09	0.96	-0.07	0.798446	0.1	0.918313	0.247394	224.593	626.2	10.4
M225T701	1.10322e+06	1.02682e+06	18.36	1.01087e+06	1.00275e+06	22.08	1.09	0.13	0.505361	0.3	0.749981	0.603565	225.112	701.1	11.7
M225T72	9.83219e+06	1.04191e+07	48.77	1.2682e+07	1.40848e+07	35.74	0.78	-0.37	0.160528	0.79	0.408129	0.614223	224.989	71.7	1.2
M225T724	798217	761125	53.7	1.81594e+06	1.67624e+06	33.97	0.44	-1.19	0.0018648	2.73	0.0275628	1.60211	225.148	724	12.1
M225T739	332080	312272	47.1	298683	313846	33.53	1.11	0.15	0.95913	0.02	0.985204	0.248406	225.196	739.1	12.3
M225T749	634261	479403	69.81	594001	640472	39.91	1.07	0.09	1	0	1	0.132495	225.185	748.8	12.5
M225T759	4.1667e+06	2.61955e+06	86.45	3.05398e+06	2.71312e+06	68.23	1.36	0.45	0.798446	0.1	0.918313	0.497452	225.06	758.7	12.6
M225T763	3.98784e+06	3.83374e+06	36.13	3.07121e+06	2.87089e+06	34.97	1.3	0.38	0.194872	0.71	0.457172	0.842046	225.196	762.6	12.7
M225T767	2.06503e+06	1.855e+06	70.75	4.8862e+06	4.51788e+06	38.9	0.42	-1.24	0.00699301	2.16	0.0602244	1.68152	225.148	767.4	12.8
M225T79	1.67432e+06	1.64852e+06	16.64	1.6373e+06	1.4663e+06	30.77	1.02	0.03	0.382284	0.42	0.64771	0.253779	225.023	78.7	1.3
[truncated: 14,097 more rows]
