# Supplementary material for: The impact of dapagliflozin for the myocardial metabolomic profiles of mice with chronic heart failure induced by a high fat diet
Source: Research Square preprint supplement (doi:10.21203/rs.3.rs-6881055/v1), 2025-06-25
Supplement: Supplementary file 11 [file 8a5bbf8ef68855e8538c6699.xlsx]

## Sheet: DEM
Accession	Accession	DAPA1	DAPA2	DAPA3	DAPA4	DAPA5	DAPA6	DAPA7	DAPA8	HDF1	HDF2	HDF3	HDF4	HDF5	HDF6	HDF7	HDF8	DAPA_Mean	DAPA_Median	DAPA_RSD	HDF_Mean	HDF_Median	HDF_RSD	FC	log2FC	P.value	-log10(P.value)	FDR	VIP	Mass-to-charge ratio	Retention indices	Retention times(min)	Regulation
M101T85	M101T85	1.5737e+07	1.57675e+07	1.78944e+07	1.38926e+07	7.70238e+06	1.08816e+07	1.36773e+07	1.22929e+07	1.80008e+07	1.51339e+07	2.86451e+07	1.92059e+07	2.07352e+07	8.69738e+06	1.81047e+07	1.67806e+07	1.34807e+07	1.37849e+07	23.72	1.81629e+07	1.80528e+07	30.75	0.74	-0.43	0.0281274	1.55	0.261699	1.32834	101.071	85.3	1.4	Down
M102T72_1	M102T72_1	1.98223e+07	5.44876e+06	5.53468e+06	3.73694e+06	7.08991e+06	2.88165e+07	7.11289e+06	3.03518e+07	1.3462e+06	1.23384e+07	6.41695e+06	4.27834e+06	1.47473e+06	1.11992e+06	6.46077e+06	4.83792e+06	1.34892e+07	7.1014e+06	82.36	4.78415e+06	4.55813e+06	78.61	2.82	1.5	0.0498834	1.3	0.330421	1.58342	102.022	71.8	1.2	Up
M102T747	M102T747	4.37747e+06	7.73572e+06	6.4772e+06	6.13397e+06	4.89232e+06	6.1492e+06	5.39907e+06	4.78138e+06	4.51456e+06	5.262e+06	4.32688e+06	3.20814e+06	3.23901e+06	3.43989e+06	5.80174e+06	5.96461e+06	5.74329e+06	5.76652e+06	19.14	4.4696e+06	4.42072e+06	25.12	1.28	0.36	0.0379176	1.42	0.297283	1.60123	102.034	747.1	12.5	Up
M103T89	M103T89	7.64168e+06	6.10832e+06	8.82113e+06	6.88346e+06	9.11179e+06	4.93683e+06	6.43872e+06	6.1375e+06	1.28073e+07	9.64736e+06	1.83419e+07	9.54727e+06	8.95072e+06	7.31035e+06	9.58586e+06	9.13613e+06	7.00993e+06	6.66109e+06	20.4	1.06659e+07	9.56657e+06	32.38	0.66	-0.61	0.0018648	2.73	0.096514	1.95919	103.039	89.5	1.5	Down
M104T122	M104T122	8.54964e+07	2.16873e+08	1.17818e+08	6.18494e+07	8.48713e+07	1.03329e+08	9.0702e+07	8.16856e+07	6.94645e+06	8.15947e+07	5.41588e+06	6.88875e+06	7.0323e+06	5.71049e+07	3.50124e+07	8.98592e+07	1.05328e+08	8.80992e+07	45.5	3.62318e+07	2.10223e+07	98.37	2.91	1.54	0.0029526	2.53	0.116769	1.9958	104.053	121.7	2	Up
M104T89	M104T89	4.9409e+07	3.68879e+07	5.77263e+07	3.94321e+07	4.56332e+07	5.94194e+07	3.39717e+07	4.0042e+07	1.30489e+08	4.54488e+07	1.37416e+08	1.53448e+08	1.27511e+08	4.02951e+07	4.48976e+07	6.84799e+07	4.53152e+07	4.28376e+07	20.97	9.34982e+07	9.79952e+07	51.41	0.48	-1.04	0.0379176	1.42	0.297283	1.77531	104.07	88.8	1.5	Down
M105T72	M105T72	4.00068e+06	3.81554e+06	3.51171e+06	4.12371e+06	3.95251e+06	4.79307e+06	4.52675e+06	4.60867e+06	3.17589e+06	4.00106e+06	4.59304e+06	3.05431e+06	3.16345e+06	3.45786e+06	3.83217e+06	3.48473e+06	4.16658e+06	4.06219e+06	10.52	3.59531e+06	3.4713e+06	14.5	1.16	0.21	0.0379176	1.42	0.297283	1.64936	105.003	71.8	1.2	Up
M106T84	M106T84	1.2094e+08	1.09044e+08	1.26549e+08	1.55734e+08	1.53242e+08	7.8728e+07	1.29168e+08	1.54287e+08	6.73003e+07	1.39813e+08	9.92476e+07	7.67242e+07	7.21808e+07	7.06107e+07	1.01905e+08	1.00992e+08	1.28461e+08	1.27858e+08	20.67	9.10968e+07	8.79859e+07	26.9	1.41	0.5	0.0104118	1.98	0.169968	1.82571	106.05	84.5	1.4	Up
M108T115	M108T115	925352	1.54488e+06	1.09595e+06	476374	843587	1.66278e+06	1.43131e+06	1.37705e+06	2.06976e+06	2.91029e+06	1.66216e+06	1.38976e+06	2.30149e+06	1.16616e+06	995247	3.05776e+06	1.16966e+06	1.2365e+06	34.62	1.94408e+06	1.86596e+06	39.89	0.6	-0.73	0.0498834	1.3	0.330421	1.61886	107.505	114.5	1.9	Down
M109T682	M109T682	862842	303451	1.01008e+06	293567	561536	446469	835011	426690	1.12239e+06	889778	2.71563e+06	1.87278e+06	1.75325e+06	265874	1.97263e+06	873557	592456	504003	46.4	1.43323e+06	1.43782e+06	54.68	0.41	-1.27	0.0206682	1.68	0.228643	1.73372	109.101	681.7	11.4	Down
M110T811	M110T811	1.37873e+08	7.89371e+07	8.05272e+07	2.30927e+08	1.40677e+08	7.07407e+07	8.85744e+07	1.08835e+08	3.21771e+07	2.42955e+07	6.61953e+07	6.76041e+07	4.1019e+07	1.13333e+08	1.32666e+08	1.44024e+07	1.17136e+08	9.87046e+07	45.37	6.14615e+07	5.36071e+07	69.28	1.91	0.93	0.0206682	1.68	0.228643	1.71332	110.02	811.1	13.5	Up
M110T86	M110T86	2.44756e+06	1.98717e+07	1.54291e+07	1.69433e+07	6.99014e+06	3.43883e+07	1.59421e+07	1.24386e+07	3.67661e+07	1.20467e+07	3.19575e+07	3.02185e+07	4.29593e+07	3.83017e+07	2.98439e+07	3.642e+07	1.55564e+07	1.56856e+07	61	3.23142e+07	3.41888e+07	28.82	0.48	-1.05	0.014763	1.83	0.200021	1.69269	110.027	85.6	1.4	Down
M111T818	M111T818	3.71572e+06	5.83658e+06	2.76755e+06	2.62993e+06	2.53221e+06	4.33685e+06	5.59926e+06	5.11939e+06	4.76721e+06	9.54637e+06	8.04317e+06	7.31823e+06	4.72293e+06	5.50268e+06	8.30682e+06	3.70246e+06	4.06719e+06	4.02629e+06	33.37	6.48873e+06	6.41045e+06	32.21	0.63	-0.67	0.0498834	1.3	0.330421	1.75022	111.117	817.6	13.6	Down
M112T104	M112T104	1.65252e+06	1.73056e+06	1.40219e+06	1.15432e+06	1.53161e+06	2.15946e+06	2.13524e+06	1.98757e+06	2.53936e+06	2.34275e+06	2.18347e+06	2.16546e+06	2.50838e+06	1.85708e+06	1.79988e+06	2.88145e+06	1.71918e+06	1.69154e+06	20.84	2.28473e+06	2.26311e+06	15.84	0.75	-0.41	0.004662	2.33	0.129379	1.88864	112.076	103.6	1.7	Down
M113T115	M113T115	1.26633e+06	2.43923e+06	752796	2.02009e+06	5.3901e+06	1.88137e+06	1.06353e+06	1.33489e+06	135441	1.18835e+06	212116	826941	1.00252e+06	179395	94429.4	609987	2.01854e+06	1.60813e+06	72.79	531148	411052	81.78	3.8	1.93	0.0018648	2.73	0.096514	2.11143	113.071	114.7	1.9	Up
M113T724	M113T724	907426	733474	902956	869819	911764	608780	845674	794646	379642	345010	343240	357377	411381	333779	775555	167257	821818	857747	12.91	389155	351193	44.22	2.11	1.08	0.000621601	3.21	0.069967	2.38519	113.06	723.8	12.1	Up
M113T787	M113T787	3.38207e+06	7.53914e+06	6.5305e+06	7.30808e+06	7.09017e+06	4.2258e+06	5.69173e+06	4.98673e+06	4.45896e+06	3.90884e+06	2.48825e+06	3.29004e+06	2.90222e+06	4.27807e+06	4.40141e+06	4.05508e+06	5.84428e+06	6.11112e+06	26.25	3.72286e+06	3.98196e+06	19.9	1.57	0.65	0.0104118	1.98	0.169968	2.04801	113.06	786.6	13.1	Up
M113T89_2	M113T89_2	2.34351e+06	2.90814e+06	3.09407e+06	2.2226e+06	4.53768e+06	4.17246e+06	3.33848e+06	2.60589e+06	2.21791e+06	1.90591e+06	2.46147e+06	2.46873e+06	1.74909e+06	2.77476e+06	2.80424e+06	1.92185e+06	3.15286e+06	3.00111e+06	26.47	2.288e+06	2.33969e+06	17.65	1.38	0.46	0.0206682	1.68	0.228643	1.76469	113.071	89	1.5	Up
M114T208	M114T208	2.80557e+07	3.62443e+07	3.33107e+07	3.49406e+07	3.82546e+07	3.50975e+07	4.06629e+07	3.70911e+07	9.66386e+06	3.65943e+07	1.44764e+07	9.20317e+06	1.41613e+07	2.38579e+07	2.67044e+07	3.92037e+07	3.54572e+07	3.56709e+07	10.55	2.17331e+07	1.91672e+07	54.11	1.63	0.71	0.0379176	1.42	0.297283	1.8624	114.065	208.3	3.5	Up
M114T315	M114T315	580952	2.18516e+06	902585	291929	467969	636540	882207	569157	850288	695318	988195	2.59478e+06	1.66857e+06	2.03933e+06	790313	2.48947e+06	814562	608746	72.34	1.51453e+06	1.32838e+06	51.93	0.54	-0.89	0.0379176	1.42	0.297283	1.58005	114.037	314.7	5.2	Down
M114T338	M114T338	2.93562e+08	4.55387e+08	3.15652e+08	2.90288e+08	3.38632e+08	3.04082e+08	3.71873e+08	3.41057e+08	2.20403e+06	2.22836e+08	3.48141e+06	2.85538e+06	4.74711e+06	1.94343e+08	1.68817e+08	2.10716e+08	3.38817e+08	3.27142e+08	16.1	1.0125e+08	86782182	104.5	3.35	1.74	0.0001554	3.81	0.0532196	1.93845	114.065	338.2	5.6	Up
M114T577	M114T577	4.35915e+07	6.7472e+07	4.95384e+07	6.09818e+07	9.11766e+07	4.89438e+07	6.52131e+07	5.25553e+07	2.12701e+08	1.25682e+08	2.21976e+08	5.89786e+07	7.53753e+07	6.55746e+07	1.50349e+08	2.13537e+08	5.99341e+07	5.67686e+07	25.32	1.40522e+08	1.38016e+08	49.6	0.43	-1.23	0.00699301	2.16	0.14968	2.00385	114.065	576.7	9.6	Down
M114T592	M114T592	4.06217e+07	3.76854e+07	6.54207e+07	5.41339e+07	4.55988e+07	4.31987e+07	5.1536e+07	4.60204e+07	3.73559e+07	2.06079e+07	2.0264e+07	4.66268e+07	3.55481e+07	4.22156e+07	2.71101e+07	5.24845e+07	4.8027e+07	4.58096e+07	18.41	3.52766e+07	3.6452e+07	33.62	1.36	0.45	0.0498834	1.3	0.330421	1.64064	114.065	592.3	9.9	Up
M114T799	M114T799	2.62577e+08	2.69683e+08	2.91831e+08	2.79382e+08	2.40351e+08	2.62722e+08	2.82003e+08	2.53506e+08	2.37178e+08	1.06813e+08	2.40746e+08	2.72245e+08	1.79374e+08	1.61872e+08	2.4354e+08	2.13603e+08	2.67757e+08	2.66203e+08	6.2	2.06921e+08	2.2539e+08	26.17	1.29	0.37	0.00699301	2.16	0.14968	1.72599	113.963	798.9	13.3	Up
M115T387	M115T387	1.98278e+06	187770	1.4028e+06	438393	1.50058e+06	216047	340360	399969	2.31629e+06	3.74756e+06	1.39782e+06	3.98092e+06	2.52076e+06	1.6157e+06	1.02184e+06	1.69039e+06	808587	419181	87.08	2.28641e+06	2.00334e+06	47.5	0.35	-1.5	0.0104118	1.98	0.169968	2.10446	115.075	387.4	6.5	Down
M115T89	M115T89	2.85774e+06	2.15617e+06	1.39484e+06	2.46605e+06	3.15338e+06	1.49767e+06	3.69137e+06	2.63224e+06	802899	1.4346e+06	1.27989e+06	1.3675e+06	1.00835e+06	1.24235e+06	1.01392e+06	1.12271e+06	2.48118e+06	2.54914e+06	31.71	1.15903e+06	1.18253e+06	18.24	2.14	1.1	0.0003108	3.51	0.0568482	2.40528	115.087	89	1.5	Up
M116T309	M116T309	1.23998e+06	452691	1.36445e+06	794301	8.95891e+06	118594	510940	679988	5.10753e+06	7.29963e+06	4.07025e+06	7.09559e+06	1.46103e+06	594003	3.67123e+06	2.2008e+06	1.76498e+06	737145	166.31	3.93751e+06	3.87074e+06	62.99	0.45	-1.16	0.0379176	1.42	0.297283	1.6504	116.042	309.1	5.2	Down
M116T356	M116T356	1.28858e+06	1.66991e+06	1.09667e+06	1.64409e+06	1.61972e+06	1.71115e+06	1.8223e+06	1.67654e+06	1.23384e+06	1.51631e+06	1.31317e+06	1.15398e+06	1.47995e+06	1.52926e+06	1.27998e+06	1.29868e+06	1.56612e+06	1.657e+06	15.57	1.35065e+06	1.30593e+06	10.38	1.16	0.21	0.0498834	1.3	0.330421	1.45535	116.034	356.4	5.9	Up
M117T108	M117T108	1.58382e+07	1.6437e+07	1.93724e+07	1.56759e+07	1.64877e+07	1.53463e+07	1.47913e+07	1.4549e+07	1.20443e+07	1.71423e+07	1.35082e+07	1.35228e+07	1.06161e+07	1.29617e+07	1.4015e+07	1.46564e+07	1.60622e+07	1.5757e+07	9.38	1.35583e+07	1.35155e+07	14.1	1.18	0.24	0.0104118	1.98	0.169968	1.82199	116.966	107.7	1.8	Up
M117T115	M117T115	2.20139e+06	2.48124e+06	3.00053e+06	2.68192e+06	3.09313e+06	2.40724e+06	3.10783e+06	2.55071e+06	1.76502e+06	2.91792e+06	2.02941e+06	1.91806e+06	2.30756e+06	2.5189e+06	2.39707e+06	1.70028e+06	2.6905e+06	2.61631e+06	12.68	2.19428e+06	2.16848e+06	18.98	1.23	0.29	0.0206682	1.68	0.228643	1.72121	116.51	114.5	1.9	Up
M117T266	M117T266	6.66357e+06	1.00489e+07	6.7266e+06	7.03753e+06	9.64665e+06	8.51488e+06	1.04505e+07	8.87148e+06	5.04742e+06	5.80813e+06	6.19433e+06	4.5001e+06	6.20253e+06	5.03072e+06	6.52491e+06	5.54911e+06	8.49501e+06	8.69318e+06	17.97	5.60716e+06	5.67862e+06	12.53	1.52	0.6	0.0001554	3.81	0.0532196	2.40938	116.966	266.3	4.4	Up
M117T432	M117T432	1.04097e+06	733862	694321	816910	1.04228e+06	854416	904945	636282	560221	564575	428728	651774	651739	636465	792952	666362	840498	835663	18	619102	644102	17	1.36	0.44	0.00699301	2.16	0.14968	1.92829	117.102	432.1	7.2	Up
M117T90	M117T90	743537	2.24936e+06	1.26353e+06	2.05223e+06	1.66801e+06	1.51848e+06	1.63919e+06	2.74643e+06	938569	1.14204e+06	1.39704e+06	831976	1.01758e+06	1.36252e+06	872098	1.40911e+06	1.7351e+06	1.6536e+06	35.49	1.12137e+06	1.07981e+06	21.51	1.55	0.63	0.0281274	1.55	0.261699	1.73086	117.055	90.2	1.5	Up
M118T399	M118T399	5.38216e+06	5.43333e+06	7.57229e+06	3.62651e+06	9.72397e+06	2.81792e+06	5.32008e+06	2.69222e+06	1.57661e+07	1.09346e+07	2.59248e+07	2.78625e+07	2.04606e+07	4.67451e+06	7.36744e+06	7.9042e+06	5.32106e+06	5.35112e+06	45.21	1.51119e+07	1.33504e+07	58.49	0.35	-1.51	0.0104118	1.98	0.169968	2.01441	118.065	399.3	6.7	Down
M119T105	M119T105	1.4946e+07	2.10087e+07	2.0345e+07	1.60635e+07	1.2673e+07	1.80832e+07	2.22841e+07	2.13085e+07	327568	9.42917e+06	348696	327602	351865	1.34207e+07	1.02956e+07	2.91098e+06	1.8339e+07	1.92141e+07	18.93	4.67652e+06	1.63142e+06	116.84	3.92	1.97	0.0003108	3.51	0.0568482	2.11672	119.016	104.8	1.7	Up
M119T120	M119T120	7.80363e+07	6.8532e+07	7.93244e+07	8.71298e+07	7.86287e+07	8.94428e+07	8.58543e+07	7.3804e+07	6.69546e+07	5.01046e+07	8.41245e+07	7.42866e+07	7.23413e+07	6.66413e+07	5.77373e+07	4.53821e+07	8.0094e+07	7.89766e+07	8.83	6.46965e+07	6.67979e+07	19.99	1.24	0.31	0.0104118	1.98	0.169968	1.82081	119.09	120.2	2	Up
M119T790	M119T790	5.6979e+06	5.75468e+06	7.74141e+06	3.68041e+06	2.46796e+06	5.01041e+06	1.12061e+07	7.16512e+06	5.99163e+06	1.21408e+07	1.12352e+07	1.257e+07	9.98213e+06	1.06825e+07	9.89164e+06	1.16373e+07	6.09049e+06	5.72629e+06	44.06	1.05164e+07	1.09589e+07	19.62	0.58	-0.79	0.004662	2.33	0.129379	1.98237	119.014	789.6	13.2	Down
M119T802_2	M119T802_2	1.12982e+06	2.98273e+06	1.20064e+06	1.28848e+06	2.08874e+06	3.42165e+06	4.79303e+06	3.00245e+06	3.50842e+06	2.51544e+06	4.89975e+06	1.58655e+06	4.25157e+06	3.45465e+06	4.70724e+06	7.52257e+06	2.48844e+06	2.53574e+06	52.16	4.05577e+06	3.87999e+06	44.03	0.61	-0.7	0.0498834	1.3	0.330421	1.39332	119.084	801.6	13.4	Down
M124T140	M124T140	8.85119e+07	1.36621e+08	8.84356e+07	1.00996e+08	8.10749e+07	8.30021e+07	1.72292e+08	1.55661e+08	7.88375e+06	5.89367e+07	6.86828e+06	9.25923e+06	3.47085e+07	8.49666e+07	9.58298e+06	7.18339e+07	1.13324e+08	9.47539e+07	31.92	3.5505e+07	2.21458e+07	90.7	3.19	1.67	0.000621601	3.21	0.069967	2.1555	124.059	140	2.3	Up
M127T101_2	M127T101_2	2.3267e+07	2.91071e+07	3.50444e+07	3.76939e+07	2.12238e+07	2.93937e+07	3.36351e+07	4.51321e+07	2.32484e+07	1.85977e+07	2.16173e+07	4.95051e+06	3.4281e+06	1.99181e+07	1.82246e+07	2.17282e+07	3.18121e+07	3.15144e+07	24.47	1.64641e+07	1.92579e+07	47.18	1.93	0.95	0.0010878	2.96	0.0833774	1.83932	127.039	101.1	1.7	Up
M127T335	M127T335	8.74533e+06	9.18694e+06	1.00998e+07	1.16643e+07	8.67426e+06	1.01984e+07	1.23462e+07	9.71194e+06	2.55646e+06	1.02897e+07	2.2096e+06	7.38759e+06	2.66744e+06	3.25061e+06	2.76135e+06	1.03767e+07	1.00784e+07	9.90588e+06	13.18	5.18742e+06	3.00598e+06	68.96	1.94	0.96	0.0379176	1.42	0.297283	2.06764	127.05	335	5.6	Up
M127T682	M127T682	1.45894e+06	236656	1.02775e+06	2.568e+06	1.38989e+06	248584	1.17032e+06	912102	107721	304907	158634	252229	69023.3	1.22393e+06	981099	14143.9	1.12653e+06	1.09904e+06	66.07	388961	205431	116.95	2.9	1.53	0.0379176	1.42	0.297283	1.67648	127.112	681.6	11.4	Up
M127T751	M127T751	1.59427e+07	9.7722e+06	1.37901e+07	1.01136e+07	1.18199e+07	8.7764e+06	1.31107e+07	7.77964e+06	4.55984e+06	9.66182e+06	3.99348e+06	1.68995e+06	2.5099e+06	1.4811e+07	6.91053e+06	7.08059e+06	1.13882e+07	1.09667e+07	24.33	6.40215e+06	5.73519e+06	66.95	1.78	0.83	0.014763	1.83	0.200021	1.74902	126.972	751.5	12.5	Up
M129T104_1	M129T104_1	3.70579e+06	1.20295e+07	9.74107e+06	9.57674e+06	6.43832e+06	1.08158e+07	1.04962e+07	8.55787e+06	1.02363e+07	1.51369e+07	1.98203e+07	9.62839e+06	1.15945e+07	1.07489e+07	1.05139e+07	1.09924e+07	8.92016e+06	9.6589e+06	30.06	1.23339e+07	1.08706e+07	28.05	0.72	-0.47	0.0498834	1.3	0.330421	1.38445	129.055	104.2	1.7	Down
M129T137	M129T137	767781	758938	598715	611936	723588	766748	885872	909991	150854	845577	261741	193429	254064	473896	774531	521979	752946	762843	14.83	434509	367818	61.19	1.73	0.79	0.0379176	1.42	0.297283	1.84862	128.951	137	2.3	Up
M130T613	M130T613	1.12941e+06	931721	1.19755e+06	914594	1.18474e+06	772473	1.08639e+06	574265	517136	508051	429284	1.80113e+06	389078	317029	1.12862e+06	216244	973892	1.00906e+06	22.53	663322	468668	80.71	1.47	0.55	0.0498834	1.3	0.330421	1.51019	130.123	612.7	10.2	Up
M130T72_1	M130T72_1	4.65879e+06	4.096e+06	4.33593e+06	4.70792e+06	4.20661e+06	5.2664e+06	4.37861e+06	4.34817e+06	3.11794e+06	3.14835e+06	5.03676e+06	3.27899e+06	4.1173e+06	3.93212e+06	3.99038e+06	4.62277e+06	4.4998e+06	4.36339e+06	8.27	3.90557e+06	3.96125e+06	17.93	1.15	0.2	0.0498834	1.3	0.330421	1.50945	129.979	72	1.2	Up
M130T99	M130T99	689180	613957	2.23602e+06	569509	2.36864e+06	565581	1.49441e+06	629870	4.27765e+06	1.64362e+06	4.69064e+06	2.48714e+06	3.76176e+06	702449	2.04603e+06	3.37983e+06	1.1459e+06	659525	67.85	2.87364e+06	2.93349e+06	48.11	0.4	-1.33	0.00699301	2.16	0.14968	1.88569	130.086	99.4	1.7	Down
M131T116	M131T116	478126	583827	515354	611557	479812	600247	541801	648941	408776	456734	291919	606412	464789	360444	287265	382675	557458	562814	11.38	407377	395725	25.56	1.37	0.45	0.004662	2.33	0.129379	2.051	130.602	115.9	1.9	Up
M131T123	M131T123	153071	149460	228999	166220	231195	182138	227072	230478	3.17188e+06	241554	3.7321e+06	3.30114e+06	1.46259e+06	130231	246072	288629	196079	204605	18.86	1.57177e+06	875608	100.54	0.12	-3	0.0104118	1.98	0.169968	1.73601	131.053	123.3	2.1	Down
M131T338	M131T338	6.06694e+07	3.44361e+07	5.48318e+07	6.55793e+07	6.78878e+07	6.68572e+07	4.58133e+07	5.70811e+07	4.26619e+07	3.40685e+07	3.80182e+07	4.82101e+07	2.0334e+07	3.43616e+07	5.95171e+07	6.45225e+07	5.66445e+07	5.88753e+07	20.47	42711731	4.034e+07	33.76	1.33	0.41	0.0498834	1.3	0.330421	1.42826	131.049	338.4	5.6	Up
M131T35	M131T35	7.34942e+06	6.40844e+06	6.82314e+06	5.60267e+06	6.11753e+06	5.7428e+06	5.49579e+06	5.67238e+06	6.29387e+06	6.43601e+06	5.93721e+06	6.86581e+06	7.21099e+06	7.0937e+06	7.13093e+06	8.02245e+06	6.15152e+06	5.93017e+06	10.78	6.87387e+06	6.97976e+06	9.45	0.89	-0.16	0.0498834	1.3	0.330421	1.6279	130.966	34.9	0.6	Down
M131T72_1	M131T72_1	977395	1.11153e+06	1.17537e+06	296870	218275	309822	1.12228e+06	1.14961e+06	273263	261065	231523	1.10261e+06	286804	910601	226704	237806	795144	1.04446e+06	54.76	441297	267164	80.05	1.8	0.85	0.0498834	1.3	0.330421	1.22443	130.522	71.9	1.2	Up
M132T202	M132T202	6.99882e+06	8.54858e+06	1.66996e+07	2.53377e+06	6.30707e+06	7.52706e+06	7.27679e+06	1.43698e+07	8.62861e+06	643626	1.96004e+06	1.82514e+06	6.86267e+06	4.29088e+06	2.0657e+06	752411	8.78269e+06	7.40192e+06	52.03	3.37864e+06	2.01287e+06	87.42	2.6	1.38	0.014763	1.83	0.200021	1.836	132.066	201.8	3.4	Up
M132T222	M132T222	7.59387e+08	8.51058e+08	1.22461e+09	9.91987e+08	1.33633e+09	6.15738e+08	9.84347e+08	1.11237e+09	1.91425e+09	1.35389e+09	2.23345e+09	2.25738e+09	1.60887e+09	9.01797e+08	8.78772e+08	1.41014e+09	9.84479e+08	9.88167e+08	24.35	1.56982e+09	1.50951e+09	34.3	0.63	-0.67	0.0206682	1.68	0.228643	1.72087	132.102	222.2	3.7	Down
M132T338	M132T338	2.11714e+06	2.31597e+06	1.53707e+06	2.35784e+06	1.55881e+06	2.17305e+06	2.04465e+06	1.94156e+06	1.84029e+06	2.07549e+06	1.93012e+06	1.33546e+06	1.54961e+06	1.90016e+06	1.41273e+06	610675	2.00576e+06	2.08089e+06	15.6	1.58182e+06	1.69495e+06	29.91	1.27	0.34	0.0281274	1.55	0.261699	1.33619	132.053	338.4	5.6	Up
M132T86	M132T86	5.20399e+06	2.72488e+06	3.05228e+06	2.76649e+06	1.33633e+06	2.11629e+06	356475	440864	9.26629e+06	2.13141e+06	4.53981e+06	5.66529e+06	9.62241e+06	6.05312e+06	3.11761e+06	8.21791e+06	2.2497e+06	2.42059e+06	70.43	6.07673e+06	5.85921e+06	45.78	0.37	-1.43	0.004662	2.33	0.129379	1.9204	132.054	85.6	1.4	Down
M132T87	M132T87	1.53503e+07	1.49072e+07	1.43093e+07	1.4254e+07	1.34544e+07	1.39316e+07	1.39901e+07	1.41149e+07	1.46751e+07	1.49714e+07	1.53687e+07	1.62467e+07	1.50375e+07	1.58904e+07	1.49332e+07	1.42966e+07	1.4289e+07	1.41845e+07	4.14	1.51775e+07	1.50044e+07	4.2	0.94	-0.09	0.0104118	1.98	0.169968	1.85484	132.065	87	1.4	Down
M133T140	M133T140	382059	26093.8	1.69384e+06	65529.5	355846	108278	170067	175906	4.30326e+06	1.4587e+06	7.34407e+06	4.723e+06	2.54571e+06	371884	1.57532e+06	1.18718e+06	372202	172987	147.51	2.93864e+06	2.06051e+06	79.61	0.13	-2.98	0.0029526	2.53	0.116769	2.28789	133.032	139.8	2.3	Down
M133T222	M133T222	3.45468e+07	1.37025e+08	1.5206e+08	4.40418e+07	3.55499e+07	1.34939e+08	3.43436e+07	3.4261e+07	1.75516e+08	5.5386e+07	2.12146e+08	3.68842e+07	2.37735e+08	1.25113e+08	6.02951e+07	2.3486e+08	7.58459e+07	3.97958e+07	71.93	1.42242e+08	1.50314e+08	59.03	0.53	-0.91	0.0498834	1.3	0.330421	1.26594	133.105	222.1	3.7	Down
M133T742	M133T742	1.9137e+06	1.47098e+06	1.87377e+06	2.08594e+06	1.29736e+06	2.31987e+06	1.17262e+06	2.53068e+06	625102	711549	695931	1.09504e+06	1.64403e+06	478004	1.34158e+06	764173	1.83311e+06	1.89373e+06	26.49	919426	737861	43.75	1.99	1	0.0029526	2.53	0.116769	2.18732	133.101	742.5	12.4	Up
M133T768	M133T768	810830	1.73408e+06	3.20597e+06	2.48434e+06	2.02708e+06	2.94573e+06	1.63333e+06	630077	1.41745e+06	1.04336e+06	213429	1.56409e+06	1.77069e+06	633111	233479	540916	1.93393e+06	1.88058e+06	48.05	927065	838235	65.71	2.09	1.06	0.0281274	1.55	0.261699	1.623	133.101	767.6	12.8	Up
M134T108	M134T108	350335	75181.2	269000	66356.8	596200	51994.5	85870.7	81129.9	780221	671604	1.05117e+06	524186	450871	69862	517556	581951	197008	83500.3	99.09	580928	553068	48.44	0.34	-1.56	0.0206682	1.68	0.228643	1.88837	134.118	108.4	1.8	Down
M134T189	M134T189	1.52329e+07	2.2657e+07	1.53629e+07	1.448e+07	1.70727e+07	1.58158e+07	1.90424e+07	1.79151e+07	5.66373e+06	1.52802e+07	6.84276e+06	8.05758e+06	7.33523e+06	1.1883e+07	1.23473e+07	1.50631e+07	1.71973e+07	1.64443e+07	15.58	1.03091e+07	9.97027e+06	36.93	1.67	0.74	0.0010878	2.96	0.0833774	2.12662	134.107	189.3	3.2	Up
M134T222	M134T222	1.39319e+07	1.93525e+07	1.19771e+07	1.20682e+07	1.37635e+07	1.31016e+07	9.45263e+06	1.43885e+07	6.54927e+06	1.63257e+07	6.97522e+06	6.01517e+06	6.7695e+06	6.76489e+06	8.04175e+06	1.03455e+07	1.35045e+07	1.34326e+07	20.98	8.47337e+06	6.87236e+06	40.68	1.59	0.67	0.0104118	1.98	0.169968	2.05099	134.107	222.4	3.7	Up
M134T76	M134T76	418398	402375	443671	886501	590627	673849	848749	647345	497252	356702	522416	266421	309077	634405	573912	147125	613939	618986	30.58	413414	426977	40.9	1.49	0.57	0.0498834	1.3	0.330421	1.53774	134.101	76	1.3	Up
M135T79	M135T79	1.00379e+06	799447	1.1805e+06	748437	835119	836418	840076	837505	1.25277e+06	1.00302e+06	1.2253e+06	1.11545e+06	1.11925e+06	980223	984888	1.00962e+06	885162	836962	15.78	1.08631e+06	1.06253e+06	10.04	0.81	-0.3	0.014763	1.83	0.200021	2.04372	135.003	78.7	1.3	Down
M136T92	M136T92	3.97096e+06	3.91772e+06	4.30217e+06	5.82505e+06	3.03898e+06	4.38444e+06	5.59957e+06	5.28214e+06	3.32234e+06	1.57526e+06	3.35494e+06	3.61483e+06	1.93777e+06	2.14968e+06	2.9291e+06	2.29463e+06	4.54013e+06	4.3433e+06	21.01	2.64732e+06	2.61186e+06	28.54	1.71	0.78	0.0010878	2.96	0.0833774	2.26236	136.048	91.8	1.5	Up
M137T119	M137T119	2.01155e+06	1.4477e+06	1.64044e+06	1.63906e+06	764701	2.14129e+06	1.05196e+06	1.18713e+06	1.04757e+07	648740	1.06153e+07	7.72027e+06	7.56822e+06	2.34241e+06	2.0801e+06	3.20024e+06	1.48548e+06	1.54338e+06	31.7	5.58137e+06	5.38423e+06	71.21	0.27	-1.91	0.014763	1.83	0.200021	1.77161	137.065	118.8	2	Down
M137T385	M137T385	244220	305186	264131	138655	277673	131323	187126	189704	245742	833557	537298	285017	351792	275428	425178	403819	217252	216962	29.9	419729	377805	45.85	0.52	-0.95	0.004662	2.33	0.129379	2.04583	137.065	385.2	6.4	Down
M138T100	M138T100	7.46637e+06	6.91279e+06	8.11091e+06	8.16339e+06	9.67811e+06	7.68887e+06	8.67742e+06	8.4199e+06	9.9526e+06	9.97834e+06	1.39844e+07	8.30622e+06	7.97209e+06	1.12232e+07	8.76007e+06	1.00839e+07	8.13972e+06	8.13715e+06	10.28	1.00326e+07	9.96547e+06	19.17	0.81	-0.3	0.014763	1.83	0.200021	1.70181	138.055	100.1	1.7	Down
M138T65	M138T65	2.42244e+07	2.82559e+07	2.72065e+07	2.40645e+07	2.25591e+07	3.68124e+07	2.80769e+07	2.62965e+07	6.98933e+07	3.07407e+07	6.84122e+07	6.95648e+07	7.14591e+07	2.65876e+07	2.76781e+07	3.76052e+07	2.7187e+07	2.67515e+07	16.17	5.02426e+07	5.30087e+07	42.21	0.54	-0.89	0.0104118	1.98	0.169968	1.88518	137.986	64.9	1.1	Down
M139T130	M139T130	5.57195e+06	4.99165e+06	6.43563e+06	5.12196e+06	9.97199e+06	5.11881e+06	6.56371e+06	6.64817e+06	1.71746e+07	1.38059e+07	1.89238e+07	1.16893e+07	1.43156e+07	4.66941e+06	1.22872e+07	1.38237e+07	6.30298e+06	6.00379e+06	25.94	1.33362e+07	1.38148e+07	31.85	0.47	-1.08	0.0104118	1.98	0.169968	2.19518	138.986	129.6	2.2	Down
M140T114_2	M140T114_2	865492	581424	783078	579385	1.03329e+06	591269	733713	733055	1.77375e+06	1.29965e+06	2.58388e+06	1.44514e+06	1.49609e+06	498392	1.57953e+06	1.2721e+06	737588	733384	21.54	1.49357e+06	1.47061e+06	38.83	0.49	-1.02	0.0104118	1.98	0.169968	2.06166	140.071	113.6	1.9	Down
M140T267	M140T267	1.93527e+08	8.57063e+08	3.59816e+08	4.56479e+08	5.28104e+08	5.32816e+08	8.43963e+08	6.95774e+08	8.86636e+07	4.13305e+07	3.55281e+08	6.0783e+08	1.01841e+08	4.15716e+08	7.07391e+07	4.10557e+08	5.58443e+08	5.3046e+08	41.4	2.61495e+08	2.28561e+08	81.12	2.14	1.09	0.0206682	1.68	0.228643	1.77662	139.981	266.5	4.4	Up
M140T593	M140T593	5.57669e+06	1.76927e+06	1.36078e+06	9.4849e+06	5.96986e+06	2.44862e+06	3.05502e+06	2.62202e+06	988830	538465	2.03661e+06	827688	1.41028e+06	4.27608e+06	3.00831e+06	152605	4.0359e+06	2.83852e+06	68.55	1.65486e+06	1.19955e+06	84.04	2.44	1.29	0.0379176	1.42	0.297283	1.63137	139.98	593.4	9.9	Up
M140T619	M140T619	1.81169e+06	3.48882e+06	2.61013e+06	2.81179e+06	3.4099e+06	2.30411e+06	3.21266e+06	1.92471e+06	1.17568e+06	1.36482e+06	718794	1.71399e+06	2.1108e+06	2.47936e+06	2.24819e+06	1.11921e+06	2.69673e+06	2.71096e+06	24.1	1.61636e+06	1.53941e+06	38.48	1.67	0.74	0.00699301	2.16	0.14968	1.93583	139.98	619.4	10.3	Up
M140T72_1	M140T72_1	1.85552e+06	1.94943e+06	2.06975e+06	2.08586e+06	1.82783e+06	1.86923e+06	2.03466e+06	2.02668e+06	1.54544e+06	601676	1.45019e+06	1.79719e+06	1.54643e+06	1.60417e+06	1.82963e+06	1.64602e+06	1.96487e+06	1.98805e+06	5.25	1.50259e+06	1.5753e+06	25.69	1.31	0.39	0.0003108	3.51	0.0568482	1.62145	139.527	71.8	1.2	Up
M140T77	M140T77	1.43503e+06	1.58436e+06	1.68503e+06	1.72675e+06	1.43701e+06	1.64857e+06	1.72309e+06	1.78656e+06	1.25889e+06	1.61131e+06	1.26908e+06	1.28475e+06	1.17145e+06	1.23491e+06	1.17936e+06	1.19095e+06	1.6283e+06	1.6668e+06	8.15	1.27509e+06	1.2469e+06	11.17	1.28	0.35	0.0010878	2.96	0.0833774	2.45349	140.068	76.8	1.3	Up
M141T104	M141T104	1.61346e+06	2.16502e+06	1.23861e+06	2.37519e+06	1.72996e+06	2.41601e+06	3.07434e+06	1.23958e+06	1.35146e+06	795480	853278	1.58616e+06	1.09509e+06	1.83495e+06	666628	1.2298e+06	1.98152e+06	1.94749e+06	32.33	1.17661e+06	1.16244e+06	34.46	1.68	0.75	0.0104118	1.98	0.169968	1.9338	140.995	103.6	1.7	Up
M142T129	M142T129	7.21681e+06	3.64991e+06	6.30792e+06	3.78598e+06	8.71999e+06	3.04731e+06	4.11414e+06	4.48627e+06	1.24319e+07	1.05067e+07	2.17145e+07	1.00015e+07	8.92738e+06	4.07833e+06	8.41026e+06	1.00391e+07	5.16604e+06	4.30021e+06	38.99	1.07637e+07	1.00203e+07	46.78	0.48	-1.06	0.004662	2.33	0.129379	2.01608	141.979	129.4	2.2	Down
M142T828	M142T828	6.19035e+06	5.43609e+06	5.29083e+06	6.41171e+06	4.05026e+06	7.04035e+06	5.39261e+06	4.61262e+06	4.00167e+06	3.55491e+06	3.62053e+06	4.42855e+06	4.19106e+06	2.49078e+06	4.56958e+06	3.68638e+06	5.5531e+06	5.41435e+06	17.49	3.81793e+06	3.84402e+06	17.14	1.45	0.54	0.0010878	2.96	0.0833774	2.16659	142.21	828.3	13.8	Up
M143T542	M143T542	2.18718e+06	1.12806e+06	1.81512e+06	828084	1.81611e+06	3.02797e+06	872940	2.02182e+06	5.14981e+06	2.23943e+06	4.6713e+06	2.90805e+06	3.65414e+06	2.19669e+06	2.15449e+06	2.39416e+06	1.71216e+06	1.81561e+06	43.6	3.17101e+06	2.65111e+06	37.55	0.54	-0.89	0.004662	2.33	0.129379	1.94509	143.107	542.1	9	Down
M144T101	M144T101	3.94906e+07	4.32898e+07	4.67539e+07	4.25246e+07	4.14612e+07	4.21986e+07	4.11758e+07	4.02684e+07	5.12012e+07	4.87775e+07	4.77539e+07	4.26978e+07	4.46038e+07	4.61834e+07	4.41266e+07	4.18397e+07	4.21453e+07	4.18299e+07	5.28	4.5898e+07	4.53936e+07	6.96	0.92	-0.12	0.014763	1.83	0.200021	1.73528	144.102	100.6	1.7	Down
M145T682	M145T682	231315	48860.1	251227	47268.7	295774	71888.2	194504	68703.5	550166	443307	523556	411618	469591	42809.8	361284	379870	151193	133196	67.81	397775	427462	39.65	0.38	-1.4	0.0104118	1.98	0.169968	1.72526	145.123	681.7	11.4	Down
M146T383	M146T383	1.99185e+06	550121	1.74901e+06	2.6226e+06	1.22214e+06	2.67982e+06	1.56676e+06	1.7559e+06	133872	739868	288002	1.58182e+06	400267	468050	166277	1.22443e+06	1.76727e+06	1.75245e+06	39.63	625323	434159	83.93	2.83	1.5	0.004662	2.33	0.129379	2.04125	146.118	382.5	6.4	Up
M146T66	M146T66	237393	283023	322163	263688	350800	278978	258230	265914	340928	371163	343429	364758	378996	284396	254183	406213	282524	272446	13.04	343008	354094	14.74	0.82	-0.28	0.0281274	1.55	0.261699	1.69692	145.607	66.5	1.1	Down
M147T191	M147T191	5.99593e+06	5.37603e+06	7.38387e+06	4.21698e+06	4.25986e+06	4.88247e+06	5.26886e+06	5.3507e+06	6.57374e+06	7.40988e+06	6.72744e+06	8.7839e+06	6.28112e+06	6.15541e+06	5.36764e+06	6.8479e+06	5.34184e+06	5.30978e+06	19.05	6.76838e+06	6.65059e+06	14.87	0.79	-0.34	0.0104118	1.98	0.169968	1.87723	147.044	191	3.2	Down
M147T76_1	M147T76_1	310146	190491	218404	204494	177971	197340	201394	181800	244139	301024	281462	248958	277252	296361	212539	266497	210255	199367	20.15	266029	271874	11.13	0.79	-0.34	0.014763	1.83	0.200021	2.02688	147.008	76	1.3	Down
M147T76_2	M147T76_2	8.24992e+08	8.85204e+08	8.50171e+08	1.25887e+09	9.52456e+08	1.02177e+09	9.78312e+08	1.08174e+09	5.11289e+08	8.32376e+08	5.16348e+08	4.90104e+08	4.69787e+08	7.48864e+08	8.55745e+08	7.80983e+08	9.8169e+08	9.65384e+08	14.43	6.50687e+08	6.32606e+08	25.83	1.51	0.59	0.0010878	2.96	0.0833774	2.22156	147.113	76.3	1.3	Up
M147T97	M147T97	1.40817e+07	1.37618e+07	1.52773e+07	1.44392e+07	1.21841e+07	1.23583e+07	1.30462e+07	1.27589e+07	1.57346e+07	1.69987e+07	1.63227e+07	1.40405e+07	1.50234e+07	1.44553e+07	1.39258e+07	1.59592e+07	1.34884e+07	1.3404e+07	8.04	1.53075e+07	1.5379e+07	7.33	0.88	-0.18	0.0104118	1.98	0.169968	1.97082	147.121	96.9	1.6	Down
M148T72	M148T72	2.77101e+06	2.40498e+06	2.75868e+06	2.04871e+06	2.31491e+06	1.97224e+06	2.09574e+06	2.10946e+06	2.65461e+06	2.99119e+06	2.58457e+06	2.66678e+06	2.71642e+06	2.84974e+06	2.74359e+06	2.90528e+06	2.30947e+06	2.21218e+06	13.61	2.76402e+06	2.73001e+06	5.03	0.84	-0.26	0.0206682	1.68	0.228643	2.17856	148.027	71.8	1.2	Down
M148T99_1	M148T99_1	2.71334e+06	4.14561e+06	2.75146e+06	3.5771e+06	3.06361e+06	4.85854e+06	4.7859e+06	4.784e+06	719091	2.83348e+06	698840	676733	1.85716e+06	2.88137e+06	2.3945e+06	3.36761e+06	3.83495e+06	3.86135e+06	24.23	1.9286e+06	2.12583e+06	57.34	1.99	0.99	0.00699301	2.16	0.14968	1.93107	148.097	99.4	1.7	Up
M149T565	M149T565	733726	462068	900115	1.40198e+06	3.36778e+06	775432	489038	468312	4.97742e+06	2.09397e+06	3.55395e+06	596874	1.68683e+06	917443	1.12355e+06	1.54795e+06	1.07481e+06	754579	90.94	2.06225e+06	1.61739e+06	72.08	0.52	-0.94	0.0379176	1.42	0.297283	1.37379	149.045	565.4	9.4	Down
M150T107	M150T107	292117	327715	311015	310636	280244	300526	291686	281848	835965	277531	895213	656962	906505	320266	323863	311706	299473	296322	5.43	566001	490412	50.52	0.53	-0.92	0.0281274	1.55	0.261699	1.72433	149.664	107.3	1.8	Down
M150T122	M150T122	1.31932e+09	1.26079e+09	1.48709e+09	1.09191e+09	1.46057e+09	1.48222e+09	1.10215e+09	9.54124e+08	5.18016e+08	7.5273e+08	6.38356e+08	2.95921e+08	3.50252e+08	7.59322e+08	1.10261e+09	1.35335e+08	1.26977e+09	1.29006e+09	16.05	5.69067e+08	5.78186e+08	54.47	2.23	1.16	0.0010878	2.96	0.0833774	2.11907	150.058	121.7	2	Up
M150T288	M150T288	293367	192646	752060	778738	849506	1.24831e+06	1.06949e+06	1.10569e+06	2.13319e+06	2.31577e+06	3.00559e+06	1.52739e+06	1.32201e+06	1.16979e+06	841055	289409	786226	814122	47.98	1.57552e+06	1.4247e+06	55.38	0.5	-1	0.0379176	1.42	0.297283	1.27695	150.055	288	4.8	Down
M150T356	M150T356	7.64329e+06	7.21791e+06	9.44822e+06	9.62323e+06	8.02722e+06	9.27624e+06	9.97252e+06	9.76392e+06	1.06593e+07	1.3429e+07	1.14456e+07	1.12639e+07	9.93137e+06	8.52106e+06	1.1131e+07	8.34256e+06	8.87157e+06	9.36223e+06	12.07	1.05905e+07	10895142	15.68	0.84	-0.26	0.0281274	1.55	0.261699	1.56137	150.049	356.4	5.9	Down
M150T601	M150T601	992421	834992	1.23761e+06	1.11423e+06	814438	787733	783983	836446	248656	73926.8	525501	871138	240675	1.06096e+06	709558	718452	925231	835719	18.49	556108	617529	61.98	1.66	0.73	0.0281274	1.55	0.261699	1.58456	150.128	600.6	10	Up
M150T686	M150T686	392101	303997	314839	538229	283001	275394	438332	341451	298008	933298	498379	422788	854696	429219	812860	507952	360918	328145	25.12	594650	503166	39.78	0.61	-0.72	0.0379176	1.42	0.297283	1.75419	150.092	686.4	11.4	Down
M150T84_1	M150T84_1	4.60296e+06	3.54476e+06	7.32531e+06	4.38027e+06	8.61775e+06	3.82579e+06	3.44927e+06	3.17935e+06	6.23547e+06	1.13609e+07	1.10393e+07	7.03308e+06	4.85708e+06	5.32968e+06	4.48519e+06	5.26267e+06	4.86568e+06	4.10303e+06	41.18	6.95043e+06	5.78258e+06	39.45	0.7	-0.51	0.0498834	1.3	0.330421	1.3946	150	83.8	1.4	Down
M150T84_2	M150T84_2	5.98773e+06	5.77377e+06	5.62304e+06	5.65661e+06	5.7136e+06	5.77226e+06	5.69637e+06	5.45174e+06	6.26122e+06	6.16295e+06	5.74547e+06	5.90312e+06	6.33952e+06	6.25209e+06	7.18247e+06	6.36292e+06	5.70939e+06	5.70498e+06	2.67	6.27622e+06	6.25666e+06	6.78	0.91	-0.14	0.0018648	2.73	0.096514	2.13668	150.076	83.6	1.4	Down
M152T279	M152T279	2.98909e+07	2.21778e+07	4.90778e+07	4.06281e+07	4.89796e+07	1.83956e+07	2.93576e+07	2.71937e+07	5.62781e+07	6.87673e+07	5.84495e+07	4.65575e+07	3.89444e+07	4.16711e+07	4.47548e+07	4.24645e+07	3.32126e+07	2.96242e+07	35.24	4.97359e+07	4.56561e+07	20.81	0.67	-0.58	0.0281274	1.55	0.261699	1.86592	152.057	279.1	4.7	Down
M152T398	M152T398	6.87331e+06	6.70251e+06	1.15789e+07	2.20458e+07	7.91171e+06	1.21829e+07	9.69118e+06	1.42803e+07	1.38337e+07	2.42701e+06	6.26288e+06	8.3119e+06	5.7227e+06	5.81481e+06	3.59633e+06	4.09591e+06	1.14083e+07	1.06351e+07	44.44	6.25815e+06	5768755	56.83	1.82	0.87	0.014763	1.83	0.200021	1.82515	152.107	397.6	6.6	Up
M152T417	M152T417	117712	797257	80218.9	455401	942498	475160	490402	993207	55407.3	100032	460186	363420	31036.6	38096.2	20771.2	306203	543982	482781	63.57	171894	77719.9	102.46	3.16	1.66	0.0104118	1.98	0.169968	1.79264	152.034	416.6	6.9	Up
M152T525	M152T525	1.37707e+06	1.0785e+06	1.8512e+06	1.11217e+06	2.25956e+06	1.18077e+06	960040	1.26672e+06	4.37005e+06	2.51443e+06	5.10457e+06	1.7337e+06	3.7213e+06	944709	3.51468e+06	3.00448e+06	1.38576e+06	1.22375e+06	32.12	3.11349e+06	3.25958e+06	43.86	0.45	-1.17	0.0206682	1.68	0.228643	1.99762	152.071	525.4	8.8	Down
M152T620	M152T620	1.45375e+06	7.20187e+06	1.78233e+06	199876	1.96553e+06	8.68329e+06	7.40196e+06	5.49915e+06	1.2855e+07	1.50704e+07	8.6543e+06	6.40752e+06	1.20615e+07	4.51965e+06	4.51763e+06	1.67349e+07	4.27347e+06	3.73234e+06	76.79	1.01026e+07	1.03579e+07	47.06	0.42	-1.24	0.0379176	1.42	0.297283	1.66207	152.017	620.1	10.3	Down
M153T122	M153T122	4.30886e+08	9.49975e+08	5.74037e+08	7.05063e+08	7.10624e+08	7.41007e+08	1.0541e+09	1.13154e+09	3.53387e+08	8.4171e+08	1.2751e+08	2.65528e+08	3.71441e+08	4.52353e+08	4.87528e+08	6.06056e+08	7.87155e+08	7.25815e+08	30.5	4.38189e+08	4.11897e+08	49.67	1.8	0.85	0.014763	1.83	0.200021	1.82747	153.041	121.9	2	Up
M153T318	M153T318	3.31819e+07	5.40575e+07	2.95014e+07	3.35664e+07	3.62974e+07	3.55005e+07	3.36422e+07	4.23666e+07	1.07467e+07	3.21581e+07	1.63124e+07	1.61533e+07	1.50035e+07	1.23693e+07	2.72989e+07	3.45564e+07	3.72642e+07	3.45714e+07	20.68	2.05748e+07	1.62329e+07	45.28	1.81	0.86	0.0029526	2.53	0.116769	2.13384	153.041	318.1	5.3	Up
M154T115	M154T115	1.71239e+06	1.63825e+06	2.56133e+06	2.45321e+06	2.08608e+06	2.70658e+06	1.27181e+06	1.62912e+06	1.48773e+06	1.47205e+06	1.29677e+06	2.08585e+06	1.50697e+06	1.40946e+06	759812	1.29266e+06	2.00735e+06	1.89924e+06	26.01	1.41391e+06	1.44076e+06	25.71	1.42	0.51	0.0206682	1.68	0.228643	1.7084	154.086	114.9	1.9	Up
M154T122_1	M154T122_1	5.63058e+06	4.514e+06	1.08168e+07	3.05939e+07	5.76654e+06	1.19892e+07	7.94541e+06	6.57309e+06	1.58504e+06	5.40958e+06	3.17503e+06	5.57777e+06	5.27081e+06	7.89919e+06	1.65268e+06	3.94723e+06	1.04787e+07	7.25925e+06	81.46	4.31466e+06	4.60902e+06	49.96	2.43	1.28	0.00699301	2.16	0.14968	1.81828	154.025	122	2	Up
M154T122_2	M154T122_2	2.56084e+07	2.59209e+07	2.24931e+07	2.3098e+07	2.9223e+07	2.49669e+07	3.01531e+07	2.73695e+07	1.71019e+07	1.56368e+07	2.02395e+07	2.54762e+07	1.92629e+07	2.24533e+07	2.50309e+07	1.4054e+07	2.61041e+07	2.57646e+07	10.38	1.99069e+07	1.97512e+07	21.2	1.31	0.39	0.004662	2.33	0.129379	1.97827	154.044	122	2	Up
M156T407	M156T407	1.7492e+06	2.0955e+06	1.88397e+06	934023	1.27345e+06	2.00784e+06	3.34399e+06	3.48627e+06	710742	802259	1.21418e+06	697883	1.9506e+06	1.00798e+06	1.80518e+06	824228	2.09678e+06	1.9459e+06	43	1.12663e+06	916103	43.93	1.86	0.9	0.014763	1.83	0.200021	1.77872	156.066	407.2	6.8	Up
M157T114	M157T114	4491.53	7276.4	34409.1	16419.9	2041.67	110073	13319.4	20478.2	333704	4655.89	312232	211181	308213	148345	116832	196371	26063.6	14869.7	136.11	203942	203776	55.58	0.13	-2.97	0.004662	2.33	0.129379	1.97425	157.011	114.1	1.9	Down
M157T90	M157T90	654044	457733	399418	511489	8.98985e+06	305232	1.89993e+06	2.04162e+06	2.59986e+06	1.26039e+07	8.7099e+06	2.78721e+06	2.14934e+06	409890	3.45976e+06	3.50719e+06	1.90741e+06	582766	154.31	4.52838e+06	3.12349e+06	89.22	0.42	-1.25	0.0379176	1.42	0.297283	1.48502	156.99	90.1	1.5	Down
M158T108	M158T108	3.36478e+06	3.90507e+06	3.41503e+06	3.4595e+06	3.59482e+06	3.06285e+06	4.21175e+06	4.89781e+06	427947	4.19015e+06	360782	108506	308544	2.72919e+06	3.22586e+06	2.95423e+06	3.73895e+06	3.52716e+06	15.64	1.78815e+06	1.57857e+06	92.09	2.09	1.06	0.00699301	2.16	0.14968	1.7466	158.1	108.3	1.8	Up
M158T112	M158T112	1.9235e+06	1.62474e+06	1.80242e+06	1.87391e+06	1.88979e+06	1.85568e+06	1.6934e+06	2.26638e+06	1.58636e+06	1.99631e+06	1.58552e+06	1.62117e+06	1.43252e+06	1.66779e+06	1.5702e+06	1.45226e+06	1.86623e+06	1.8648e+06	10.25	1.61402e+06	1.58594e+06	10.77	1.16	0.21	0.0104118	1.98	0.169968	1.80833	158.045	112	1.9	Up
M159T112	M159T112	308113	127222	120761	105026	98033	187398	102514	173430	814564	84055.7	526921	451997	217039	139222	330073	199778	152812	123991	46.43	345456	273556	70.33	0.44	-1.18	0.0498834	1.3	0.330421	1.54068	159.011	112.5	1.9	Down
M159T80	M159T80	1.09281e+08	1.05217e+08	1.07277e+08	6.33712e+07	4.78985e+07	9.20335e+07	8.81953e+07	9.25342e+07	1.25211e+08	8.40749e+07	2.06061e+08	1.32256e+08	1.36026e+08	6.57794e+07	1.16744e+08	1.24267e+08	8.82258e+07	9.22838e+07	24.88	1.23802e+08	1.24739e+08	33.42	0.71	-0.49	0.0379176	1.42	0.297283	1.44924	158.964	79.5	1.3	Down
M159T91	M159T91	754802	796717	1.01734e+06	850415	1.07371e+06	723876	942777	1.0029e+06	1.14185e+06	1.40132e+06	1.49001e+06	1.57882e+06	1.13968e+06	875438	762025	974719	895316	896596	14.71	1.17048e+06	1.14077e+06	25.35	0.76	-0.39	0.0498834	1.3	0.330421	1.53055	159.017	91	1.5	Down
M160T119	M160T119	2.53565e+09	2.5657e+09	1.99394e+09	2.31757e+09	2.60794e+09	1.9828e+09	3.00499e+09	3.1842e+09	9.51823e+08	2.4689e+09	1.6585e+09	1.32728e+08	2.35778e+08	1.49771e+09	1.91524e+09	1.9102e+09	2.5241e+09	2.55067e+09	17.02	1.34636e+09	1.5781e+09	62.04	1.87	0.91	0.0010878	2.96	0.0833774	1.62719	160.133	118.8	2	Up
M161T82	M161T82	1.94644e+06	1.78905e+06	1.77868e+06	1.78442e+06	1.20186e+06	2.09574e+06	1.68904e+06	1.72173e+06	1.10346e+06	1.37954e+06	1.17625e+06	1.47608e+06	1.35175e+06	1.55735e+06	1.14476e+06	1.86655e+06	1.75087e+06	1.78155e+06	14.75	1.38197e+06	1.36565e+06	18.38	1.27	0.34	0.0206682	1.68	0.228643	1.77051	160.92	82.1	1.4	Up
M162T114	M162T114	5.48898e+07	6.20476e+07	5.46153e+07	4.47594e+07	4.64073e+07	5.55267e+07	5.83269e+07	5.6796e+07	7.32729e+07	8.45286e+07	6.6079e+07	7.07869e+07	6.234e+07	5.61244e+07	3.94975e+07	9.94354e+07	5.41711e+07	5.52082e+07	10.76	6.90081e+07	6.8433e+07	26.14	0.78	-0.35	0.0281274	1.55	0.261699	1.41291	162.113	114.3	1.9	Down
M162T73	M162T73	194142	117051	138202	186517	145375	141939	145533	127252	113342	127091	133400	127673	120886	130144	122522	104400	149501	143657	18.11	122432	124807	7.8	1.22	0.29	0.014763	1.83	0.200021	1.73579	162.453	73.3	1.2	Up
M162T90_1	M162T90_1	914965	94597.5	203850	100780	146256	108397	57280.7	74549.4	2.17207e+06	182406	1.74743e+06	2.8196e+06	1.63742e+06	98469.7	681489	157289	212585	104589	135.2	1.18702e+06	1.15945e+06	88.14	0.18	-2.48	0.0206682	1.68	0.228643	1.81886	161.991	89.5	1.5	Down
M163T212	M163T212	1.39915e+08	1.76348e+08	1.26065e+08	1.59574e+08	1.00406e+08	1.13053e+08	1.34797e+08	1.02933e+08	6.97589e+06	1.11296e+08	3.42281e+06	2.42428e+06	2.31519e+06	1.02182e+08	1.08781e+08	9.12924e+07	1.31637e+08	1.30431e+08	20.37	5.35861e+07	4.91342e+07	99.99	2.46	1.3	0.0029526	2.53	0.116769	1.80677	162.996	211.8	3.5	Up
M163T280	M163T280	3.06647e+06	3.68245e+06	3.91024e+06	5.06204e+06	5.42373e+06	4.10757e+06	7.36949e+06	5.26483e+06	2.64844e+06	4.54627e+06	3.15049e+06	2.1301e+06	2.37354e+06	3.4818e+06	3.37445e+06	3.96493e+06	4.73585e+06	4.5848e+06	28.52	3.20875e+06	3.26247e+06	25.38	1.48	0.56	0.0206682	1.68	0.228643	1.85528	163.026	279.7	4.7	Up
M163T348	M163T348	8.03146e+07	8.02775e+07	7.84598e+07	9.7151e+07	7.01425e+07	8.01421e+07	1.04347e+08	1.00721e+08	5.48621e+07	9.65309e+07	6.76149e+07	6.21421e+07	4.39029e+07	5.12182e+07	5.97753e+07	5.64061e+07	8.64445e+07	8.02961e+07	14.39	6.15566e+07	5.80907e+07	25.71	1.4	0.49	0.0029526	2.53	0.116769	2.11137	163.001	347.9	5.8	Up
M163T517	M163T517	1.61745e+07	3.70399e+07	2.59241e+07	5.88089e+07	7.47938e+07	5.85687e+07	4.71719e+07	2.56206e+07	6.03262e+06	1.47433e+07	1.21574e+07	1.0292e+07	5.68659e+06	9.17962e+06	1.36739e+07	3.96156e+06	4.30128e+07	4.21059e+07	47.07	9.46588e+06	9.73581e+06	41.87	4.54	2.18	0.0001554	3.81	0.0532196	2.55478	162.996	517.1	8.6	Up
M163T76_1	M163T76_1	5.65889e+06	5.28223e+06	6.34621e+06	8.08497e+06	5.90159e+06	5.17915e+06	5.55518e+06	5.28316e+06	4.42174e+06	3.43833e+06	5.1366e+06	5.56555e+06	4.37802e+06	5.78789e+06	4.87741e+06	3.2811e+06	5.91142e+06	5.60703e+06	16.21	4.61083e+06	4.64957e+06	19.87	1.28	0.36	0.014763	1.83	0.200021	1.82849	163.084	75.9	1.3	Up
M163T76_2	M163T76_2	5.05983e+06	4.08996e+06	4.40582e+06	4.06215e+06	4.86956e+06	5.63326e+06	6.34731e+06	4.29857e+06	6.14236e+06	6.33587e+06	7.12737e+06	5.48399e+06	5.62078e+06	6.28423e+06	4.87689e+06	6.33772e+06	4.84581e+06	4.63769e+06	16.73	6.02615e+06	6.2133e+06	11.33	0.8	-0.31	0.0281274	1.55	0.261699	1.93427	163.108	75.7	1.3	Down
M163T90	M163T90	2.30079e+08	2.2752e+08	2.5337e+08	2.20068e+08	2.27987e+08	2.53646e+08	2.53858e+08	2.50372e+08	2.84393e+08	4.24922e+08	3.54959e+08	2.79979e+08	2.54123e+08	2.80109e+08	2.36921e+08	3.4801e+08	2.39612e+08	2.40225e+08	6.03	3.07927e+08	2.82251e+08	20.37	0.78	-0.36	0.0018648	2.73	0.096514	1.92887	163.116	89.5	1.5	Down
M164T394	M164T394	187593	437456	234249	108596	116392	273491	147095	196957	49692	41022.1	65306.8	108923	89988.9	89291.7	98846.4	43563.2	212729	192275	50.24	73329.3	77299.3	36.46	2.9	1.54	0.0003108	3.51	0.0568482	2.32056	164.107	393.6	6.6	Up
M165T101	M165T101	853503	814050	951623	901894	866662	964207	793218	878740	1.04457e+06	1.15322e+06	1.06805e+06	931323	909733	943781	894223	914994	877987	872701	6.86	982487	937552	9.59	0.89	-0.16	0.0281274	1.55	0.261699	1.71381	165.076	100.6	1.7	Down
M165T107	M165T107	1.64287e+06	1.30764e+06	1.64032e+06	1.95044e+06	1.42543e+06	1.43261e+06	1.28338e+06	1.42405e+06	724987	908363	854386	638106	641550	1.47302e+06	1.31114e+06	1.07019e+06	1.51334e+06	1.42902e+06	14.59	952719	881375	32.53	1.59	0.67	0.00699301	2.16	0.14968	2.17454	165.113	106.8	1.8	Up
M165T98	M165T98	251848	552772	388139	490821	429744	515781	1.18477e+06	696307	2.00142e+06	440928	1.21437e+06	3.49932e+06	1.20774e+06	885116	1.21995e+06	398955	563772	503301	50.04	1.35848e+06	1.21105e+06	73.85	0.42	-1.27	0.0379176	1.42	0.297283	1.58439	165.113	97.7	1.6	Down
M166T33	M166T33	6.20126e+06	7.33096e+06	6.13999e+06	5.60955e+06	5.45111e+06	7.74956e+06	5.85895e+06	6.1331e+06	7.24109e+06	8.03871e+06	6.86813e+06	6.61378e+06	7.87407e+06	6.46462e+06	7.14702e+06	8.61886e+06	6.30931e+06	6.13654e+06	12.87	7.35828e+06	7.19405e+06	10.23	0.86	-0.22	0.0206682	1.68	0.228643	1.7732	165.981	33.1	0.6	Down
M166T332	M166T332	5.67266e+06	5.95956e+06	6.8558e+06	7.73971e+06	6.16055e+06	5.71601e+06	6.68407e+06	6.22496e+06	5.42472e+06	4.26459e+06	4.62068e+06	5.89436e+06	4.2323e+06	5.83932e+06	5.07803e+06	3.06083e+06	6.37666e+06	6.19276e+06	10.86	4.80185e+06	4.84936e+06	19.93	1.33	0.41	0.0018648	2.73	0.096514	2.05801	166.073	331.5	5.5	Up
M166T338_3	M166T338_3	2.0594e+06	2.0615e+06	2.43489e+06	2.10221e+06	2.75642e+06	2.19029e+06	2.72244e+06	2.52655e+06	1.74393e+06	2.36609e+06	2.03801e+06	1.32092e+06	1.47017e+06	1.8833e+06	1.32204e+06	1.6831e+06	2.35671e+06	2.31259e+06	12.39	1.72845e+06	1.71352e+06	21.05	1.36	0.45	0.0018648	2.73	0.096514	2.11614	166.212	338.4	5.6	Up
M166T497	M166T497	313749	340340	493593	579290	454726	270678	556049	398654	585319	520685	634086	708365	715521	631859	526022	546373	425885	426690	26.72	608529	608589	12.66	0.7	-0.51	0.004662	2.33	0.129379	1.98197	166.123	497.3	8.3	Down
M166T799	M166T799	4.09814e+06	3.76994e+06	3.2472e+06	4.84703e+06	3.16972e+06	4.13856e+06	3.90042e+06	3.74746e+06	1.62614e+06	1.64164e+06	2.99357e+06	3.49277e+06	3.28288e+06	2.18734e+06	3.46936e+06	2.62883e+06	3.86481e+06	3.83518e+06	13.77	2.66532e+06	2.8112e+06	28.99	1.45	0.54	0.004662	2.33	0.129379	1.97533	165.983	798.9	13.3	Up
M167T116	M167T116	2.08193e+07	1.27687e+07	9.27823e+06	1.99853e+07	1.19333e+07	1.35582e+07	2.22631e+07	2.61088e+07	8.4318e+06	1.84237e+06	2.14461e+07	7.63584e+06	9.06156e+06	8.87356e+06	7.87086e+06	2.51335e+07	1.70894e+07	1.67718e+07	34.91	1.12869e+07	8.65268e+06	69.28	1.51	0.6	0.0498834	1.3	0.330421	1.37082	167.093	116.3	1.9	Up
M168T194	M168T194	2.37777e+07	2.01695e+07	2.44962e+07	2.27549e+07	2.83512e+07	2.07601e+07	2.49142e+07	2.6093e+07	3.32266e+07	5.00589e+07	5.41739e+07	5.1111e+07	3.40561e+07	2.30871e+07	2.03062e+07	3.23157e+07	2.39146e+07	2.4137e+07	11.3	3.72919e+07	3.36413e+07	34.83	0.64	-0.64	0.0379176	1.42	0.297283	1.79136	167.975	194.5	3.2	Down
M168T290	M168T290	2.16607e+08	1.48153e+08	1.94367e+08	2.39661e+08	2.05292e+08	2.13212e+08	1.50835e+08	2.03462e+08	1.10169e+08	5.81221e+07	1.4682e+08	1.79842e+08	8.8569e+07	1.16771e+08	3.06099e+08	2.00996e+08	1.96449e+08	2.04377e+08	16.21	1.50924e+08	1.31795e+08	51.79	1.3	0.38	0.0498834	1.3	0.330421	1.33654	167.975	289.7	4.8	Up
M168T472	M168T472	2.40916e+07	1.8102e+08	2.84751e+07	1.78425e+08	2.71473e+07	1.88526e+08	2.12088e+07	2.16375e+07	1.11149e+07	3.18043e+07	3.07005e+07	9.85254e+06	1.06953e+07	5.80474e+06	1.02683e+07	2.19126e+07	83816379	2.78112e+07	97.75	1.65192e+07	1.09051e+07	61.62	5.07	2.34	0.0379176	1.42	0.297283	1.93119	167.975	472.2	7.9	Up
M169T137_2	M169T137_2	6.445e+06	1.62877e+06	1.95831e+06	1.63436e+06	4.56109e+06	3.62837e+06	5.39559e+06	4.6571e+06	9.99905e+06	7.70301e+06	9.82634e+06	1.1759e+07	8.0795e+06	1.77113e+06	7.53317e+06	6.57177e+06	3.73857e+06	4.09473e+06	49.17	7.90537e+06	7.89126e+06	37.81	0.47	-1.08	0.004662	2.33	0.129379	1.75971	169.036	136.9	2.3	Down
M169T350	M169T350	1.7091e+07	2.47372e+07	1.75178e+07	1.87024e+07	2.44016e+07	2.15884e+07	2.84127e+07	2.58328e+07	1.14271e+06	2.45045e+07	3.06042e+06	4.29178e+06	7.11216e+06	1.17137e+07	1.51463e+07	1.43882e+07	2.22855e+07	2.2995e+07	18.86	1.017e+07	9.41292e+06	76.74	2.19	1.13	0.0029526	2.53	0.116769	1.87315	169.097	349.6	5.8	Up
M169T36	M169T36	3.74648e+06	3.13596e+06	7.15301e+06	3.0808e+06	6.33236e+06	4.93736e+06	5.32851e+06	2.8104e+06	2.82491e+06	4.8939e+06	2.64918e+06	2.27046e+06	3.22473e+06	2.58744e+06	3.50159e+06	2.64101e+06	4.56561e+06	4.34192e+06	35.64	3.07415e+06	2.73704e+06	27.02	1.49	0.57	0.0281274	1.55	0.261699	1.5625	168.976	35.8	0.6	Up
M169T464	M169T464	643803	1.11722e+06	967296	1.35019e+06	723858	1.66344e+06	1.07971e+06	906041	71019.6	142035	441358	234333	101246	438416	490896	541432	1.05645e+06	1.0235e+06	31.4	307592	336375	62	3.43	1.78	0.0001554	3.81	0.0532196	2.34999	169.076	464	7.7	Up
M169T72	M169T72	1.79428e+07	1.76866e+07	1.70531e+07	1.65383e+07	1.71412e+07	1.76658e+07	1.68838e+07	1.75226e+07	1.58609e+07	1.69567e+07	1.58103e+07	1.74189e+07	1.64476e+07	1.72075e+07	1.63203e+07	1.52458e+07	1.73043e+07	1.73319e+07	2.75	1.64085e+07	1.63839e+07	4.59	1.05	0.08	0.0206682	1.68	0.228643	1.74068	169.046	71.7	1.2	Up
M170T357	M170T357	958176	1.62852e+06	1.08988e+06	1.7074e+06	439951	2.29286e+06	1.1689e+06	1.28377e+06	1.29511e+06	159928	699137	590463	595858	597180	805423	856561	1.32118e+06	1.22633e+06	42.18	699958	648158	45.66	1.89	0.92	0.0281274	1.55	0.261699	1.64177	169.543	356.5	5.9	Up
M170T666	M170T666	667232	546940	726952	651184	639628	511930	564255	584509	466631	264772	480846	576607	488159	212261	462585	446342	611579	612068	11.7	424775	464608	28.78	1.44	0.53	0.0010878	2.96	0.0833774	1.88813	170.064	665.9	11.1	Up
M171T124	M171T124	4.84696e+07	9.36244e+07	7.19682e+07	8.20697e+07	3.30263e+07	8.8626e+07	6.54583e+07	7.49047e+07	1.15157e+06	5.1312e+06	5.77465e+06	1.80627e+06	1.62279e+06	4.59351e+07	2.82682e+07	3.05769e+07	6.97684e+07	7.34364e+07	29.32	15033343	5.45293e+06	115.3	4.64	2.21	0.0003108	3.51	0.0568482	2.24014	171.149	124.4	2.1	Up
M171T137	M171T137	4.61073e+07	4.79953e+07	8.12312e+07	4.96687e+07	5.70249e+07	4.1458e+07	5.05122e+07	5.18833e+07	8.64451e+07	7.6298e+07	9.15355e+07	9.7997e+07	6.36385e+07	7.21341e+07	5.89228e+07	6.01383e+07	53235119	5.00905e+07	22.86	7.58887e+07	7.42161e+07	19.58	0.7	-0.51	0.0029526	2.53	0.116769	2.03819	170.977	136.9	2.3	Down
M172T116	M172T116	4.47225e+07	4.79398e+07	4.81838e+07	4.45926e+07	2.98515e+07	4.76248e+07	4.11992e+07	4.32795e+07	2.70633e+07	3.76259e+07	3.30017e+07	2.28961e+07	2.59485e+07	4.42446e+07	3.78276e+07	3.95842e+07	4.34242e+07	4.46576e+07	13.84	3.3524e+07	3.53138e+07	22.53	1.3	0.37	0.00699301	2.16	0.14968	1.73223	172.097	116	1.9	Up
M172T137	M172T137	2.99238e+06	2.98292e+06	2.06438e+06	1.90734e+06	1.66278e+06	1.48494e+06	2.88197e+06	2.75032e+06	5.51663e+06	3.20222e+06	4.70435e+06	4.37535e+06	3.53203e+06	1.43232e+06	2.0154e+06	4.11295e+06	2.34088e+06	2.40735e+06	26.79	3.6114e+06	3.82249e+06	37.92	0.65	-0.63	0.0498834	1.3	0.330421	1.42565	171.977	136.9	2.3	Down
M173T366	M173T366	216512	338338	247488	252808	205738	364875	276349	265669	174124	259881	220049	296450	153733	166790	188161	213174	270972	259239	20.46	209045	200668	23.48	1.3	0.37	0.0498834	1.3	0.330421	1.69158	173.092	365.5	6.1	Up
M173T89	M173T89	2.70274e+06	1.50534e+06	2.49826e+06	1.28432e+06	2.10816e+06	1.72677e+06	1.42544e+06	1.32725e+06	6.26303e+06	2.14921e+06	5.82282e+06	8.83992e+06	5.18482e+06	2.57576e+06	2.1844e+06	2.73877e+06	1.82228e+06	1.61606e+06	30.17	4.46984e+06	3.96179e+06	54.7	0.41	-1.29	0.0029526	2.53	0.116769	2.09331	173.021	89.1	1.5	Down
M174T500	M174T500	7.21198e+06	8.20888e+06	7.96979e+06	7.7699e+06	6.48108e+06	1.37059e+06	402144	8.4684e+06	1.17261e+06	1.17888e+06	7.24358e+06	1.008e+06	1.18863e+06	1.26658e+06	1.11022e+06	1.26984e+06	5.98534e+06	7.49094e+06	53.75	1.92979e+06	1.18376e+06	111.35	3.1	1.63	0.0281274	1.55	0.261699	1.55112	174.113	500.2	8.3	Up
M175T350	M175T350	700384	443768	754907	655135	583458	455424	431039	645915	320174	543083	424976	619416	403205	163245	353358	445382	583754	614687	21.6	409105	414091	33.98	1.43	0.51	0.014763	1.83	0.200021	1.5897	175.06	349.9	5.8	Up
M175T387	M175T387	57342.6	183339	427275	66267.3	1.01138e+06	30321	739464	611521	726903	1.35353e+06	1.38735e+06	492037	450581	1.33397e+06	854619	1.03366e+06	390863	305307	94.06	954082	944142	40.14	0.41	-1.29	0.014763	1.83	0.200021	1.78002	175.06	386.6	6.4	Down
M175T65	M175T65	995515	1.23602e+06	1.00884e+06	975664	745892	1.2603e+06	1.60461e+06	1.38173e+06	1.98579e+06	1.81517e+06	1.65555e+06	2.05516e+06	1.97293e+06	949907	1.42357e+06	1.2203e+06	1.15107e+06	1.12243e+06	23.62	1.6348e+06	1.73536e+06	24.61	0.7	-0.51	0.0379176	1.42	0.297283	1.69688	175.09	65	1.1	Down
M175T758	M175T758	8.15664e+06	5.83336e+06	7.29491e+06	1.23846e+07	5.76167e+06	3.84192e+06	4.89689e+06	4.2232e+06	2.13748e+06	2.18355e+06	4.70319e+06	4.04778e+06	3.23319e+06	8.65014e+06	5.02645e+06	3.14716e+06	6.54915e+06	5.79751e+06	42.33	4.14112e+06	3.64049e+06	50.9	1.58	0.66	0.0498834	1.3	0.330421	1.55395	175.112	757.6	12.6	Up
M175T83_2	M175T83_2	5.60927e+06	5.1123e+06	4.98744e+06	4.94005e+06	5.35298e+06	5.17648e+06	5.18419e+06	5.20064e+06	5.50161e+06	5.54483e+06	5.18169e+06	5.22272e+06	5.73352e+06	5.5615e+06	6.2377e+06	5.58509e+06	5.19542e+06	5.18034e+06	4.06	5.57108e+06	5.55317e+06	5.87	0.93	-0.1	0.0206682	1.68	0.228643	1.85652	175.144	82.8	1.4	Down
M176T103	M176T103	6.06587e+06	8.81839e+06	7.38869e+06	8.11974e+06	3.35928e+06	6.01394e+06	9.21725e+06	8.14672e+06	256001	2.69777e+06	304708	747542	322195	3.37155e+06	3.39605e+06	2.85035e+06	7.14123e+06	7.75422e+06	26.93	1.74327e+06	1.72265e+06	83.44	4.1	2.03	0.000621601	3.21	0.069967	2.23131	176.111	103.4	1.7	Up
M176T112	M176T112	64053.5	30967.1	662919	76005.4	8392.98	102505	22070.5	17035.6	923771	7669.9	1.56685e+06	930449	829874	846801	503413	1.77387e+06	122994	47510.3	179.35	922836	885286	60.29	0.13	-2.91	0.014763	1.83	0.200021	1.87274	176.075	112.4	1.9	Down
M176T116	M176T116	2.22218e+06	2.54125e+06	2.36753e+06	2.82854e+06	3.35434e+06	2.28623e+06	2.65193e+06	2.3576e+06	292761	2.99347e+06	668132	944875	879310	1.57614e+06	1.83507e+06	1.63658e+06	2.5762e+06	2.45439e+06	14.5	1.35329e+06	1.26051e+06	62.69	1.9	0.93	0.00699301	2.16	0.14968	1.92438	176.038	116.4	1.9	Up
M176T192	M176T192	2.44605e+06	1.78183e+06	2.07232e+06	1.80808e+06	3.78898e+06	1.65104e+06	3.07838e+06	2.52596e+06	6.63671e+06	5.00534e+06	9.61623e+06	5.59805e+06	5.42293e+06	1.42215e+06	4.63024e+06	5.69692e+06	2.39408e+06	2.25919e+06	30.81	5.50357e+06	5.51049e+06	41.16	0.44	-1.2	0.0104118	1.98	0.169968	2.0198	176.037	192.2	3.2	Down
M176T89	M176T89	1.47643e+08	1.50625e+08	1.52628e+08	2.00633e+08	1.62265e+08	1.17781e+08	1.44639e+08	1.4981e+08	9.41998e+07	1.49295e+08	1.97724e+07	9.16772e+07	1.06985e+08	6.57111e+07	1.14318e+08	5.92966e+07	1.53253e+08	1.50218e+08	15.02	8.7657e+07	9.29385e+07	44.89	1.75	0.81	0.0010878	2.96	0.0833774	1.83818	176.103	88.9	1.5	Up
M177T100	M177T100	1.26621e+06	2.30843e+06	3.25261e+06	2.69291e+06	2.54503e+06	2.60367e+06	2.73534e+06	2.55853e+06	338367	1.59276e+06	1.12142e+06	680148	188274	1.05042e+06	2.64382e+06	2.59366e+06	2.49534e+06	2.5811e+06	22.64	1.27611e+06	1.08592e+06	73.75	1.96	0.97	0.0206682	1.68	0.228643	1.78475	177.065	100	1.7	Up
M177T328	M177T328	4.39837e+06	5.02462e+06	5.50575e+06	4.71868e+06	5.78749e+06	5.66612e+06	5.84879e+06	5.68253e+06	3.22004e+06	6.2674e+06	3.58674e+06	3.36954e+06	3.3042e+06	4.54213e+06	4.55786e+06	4.83851e+06	5.32905e+06	5.58594e+06	10.23	4.2108e+06	4.06444e+06	25	1.27	0.34	0.0379176	1.42	0.297283	1.77681	177.106	327.7	5.5	Up
M177T595	M177T595	2.20526e+06	1.88372e+06	3.02242e+06	2.05237e+06	621027	1.71134e+06	1.44573e+06	509968	1.43223e+06	661311	1.1432e+06	1.49813e+06	1.29096e+06	419387	404303	1.02795e+06	1.68148e+06	1.79753e+06	49.27	984684	1.08558e+06	44.53	1.71	0.77	0.0498834	1.3	0.330421	1.22505	177.127	595.5	9.9	Up
M178T428	M178T428	1.12318e+06	1.1216e+06	1.33157e+06	1.40171e+06	1.03201e+06	1.01414e+06	1.26735e+06	1.33439e+06	1.13134e+06	802569	1.01973e+06	1.49079e+06	973390	998604	768496	993906	1.20324e+06	1.19527e+06	12.38	1.02235e+06	996255	21.8	1.18	0.24	0.0498834	1.3	0.330421	1.48236	178.086	427.8	7.1	Up
M178T619	M178T619	1.61841e+06	1.86542e+06	2.70296e+06	1.76553e+06	1.45895e+06	1.85745e+06	2.01652e+06	1.93149e+06	1.30557e+06	1.90301e+06	1.37132e+06	1.12367e+06	1.62925e+06	1.51897e+06	1.39033e+06	1.05825e+06	1.90209e+06	1.86143e+06	19.41	1.41255e+06	1.38083e+06	19.32	1.35	0.43	0.0104118	1.98	0.169968	1.92037	178.036	618.7	10.3	Up
M179T92	M179T92	3.12146e+07	4.33476e+07	3.88778e+07	4.26436e+07	4.26156e+07	3.86909e+07	3.61205e+07	4.50789e+07	4.35236e+06	4.47523e+07	4.59732e+06	4.11889e+06	3.92547e+06	4.1291e+07	3.30584e+07	3.46106e+07	3.98237e+07	4.07467e+07	11.46	2.13383e+07	1.88278e+07	87.29	1.87	0.9	0.0498834	1.3	0.330421	1.72935	179.129	92	1.5	Up
M181T115_1	M181T115_1	518755	76707.5	651837	136646	937062	60492.6	155108	122488	1.07221e+06	1.08744e+06	1.94981e+06	695703	437072	324295	1.44362e+06	1.2022e+06	332387	145877	98.84	1.02654e+06	1.07982e+06	52.24	0.32	-1.63	0.00699301	2.16	0.14968	2.04638	181.036	114.9	1.9	Down
M181T115_2	M181T115_2	212584	193447	359630	342192	489529	239892	231080	237198	412177	638803	584688	333119	259463	321716	347976	382873	288194	238545	35.05	410102	365424	32.43	0.7	-0.51	0.0498834	1.3	0.330421	1.51215	181.053	115	1.9	Down
M181T752	M181T752	4.33401e+06	5.38337e+06	6.30667e+06	3.45293e+06	4.91579e+06	1.68622e+06	4.55983e+06	4.2333e+06	6.48634e+06	6.13348e+06	6.55465e+06	5.94667e+06	6.81986e+06	5.55289e+06	4.70462e+06	5.81201e+06	4.35902e+06	4.44692e+06	31.47	6.00132e+06	6.04008e+06	11.18	0.73	-0.46	0.00699301	2.16	0.14968	1.68372	181.122	752.4	12.5	Down
M182T124	M182T124	8.24607e+08	8.27661e+08	9.06408e+08	7.52582e+08	5.65217e+08	8.26864e+08	7.13141e+08	6.67787e+08	1.07355e+09	6.97967e+08	1.16702e+09	9.41438e+08	1.12738e+09	9.26129e+08	8.23866e+08	9.23627e+08	7.60533e+08	7.88594e+08	14.35	9.60123e+08	9.33783e+08	16.41	0.79	-0.34	0.0206682	1.68	0.228643	1.80627	182.081	124.3	2.1	Down
M182T327	M182T327	6.9051e+06	4.0994e+06	6.71375e+06	4.03578e+06	7.03812e+06	4.43728e+06	3.96544e+06	3.11834e+06	8.36281e+06	1.36886e+07	1.24298e+07	9.94513e+06	9.16879e+06	5.81349e+06	1.05274e+07	1.01162e+07	5.03915e+06	4.26834e+06	31.27	1.00065e+07	1.00307e+07	24.1	0.5	-0.99	0.0010878	2.96	0.0833774	2.39947	182.081	327.5	5.5	Down
M183T134	M183T134	3.04904e+07	3.25109e+07	2.93979e+07	3.35166e+07	3.1819e+07	3.14941e+07	3.71239e+07	3.8458e+07	7.93377e+06	3.66152e+07	9.94423e+06	1.01359e+07	1.12046e+07	2.2083e+07	2.36261e+07	2.2935e+07	3.31013e+07	3.2165e+07	9.56	1.80597e+07	1.66438e+07	55.11	1.83	0.87	0.004662	2.33	0.129379	2.07765	182.985	133.6	2.2	Up
M183T140	M183T140	1.2589e+07	1.14843e+07	1.4721e+07	2.65053e+07	3.65725e+07	1.65326e+07	2.16648e+07	1.51237e+07	7.18527e+07	4.44795e+07	8.35202e+07	9.27758e+07	6.8139e+07	5.59681e+07	3.69183e+07	3.29827e+07	1.93992e+07	1.58282e+07	43.91	6.08296e+07	6.20536e+07	35.96	0.32	-1.65	0.0003108	3.51	0.0568482	2.46171	183.083	139.6	2.3	Down
M183T72	M183T72	5.27714e+06	5.97527e+06	6.45448e+06	6.77797e+06	5.2334e+06	6.40956e+06	6.73159e+06	6.60281e+06	4.60269e+06	5.43652e+06	4.41133e+06	4.41875e+06	4.52228e+06	4.44698e+06	4.72095e+06	4.81199e+06	6.18278e+06	6.43202e+06	10.09	4.67144e+06	4.56248e+06	7.31	1.32	0.4	0.000621601	3.21	0.069967	2.57838	182.962	71.6	1.2	Up
M183T75	M183T75	753380	713910	964428	723207	844497	475264	700233	692687	179792	481228	18529.1	7523.92	21936.5	439341	463353	436276	733451	718558	19	255998	308034	85.91	2.87	1.52	0.0003108	3.51	0.0568482	1.82939	182.527	75.3	1.3	Up
M183T82	M183T82	8.12431e+06	9.75551e+06	8.43123e+06	8.58167e+06	7.91798e+06	1.0394e+07	8.72832e+06	8.47816e+06	6.5391e+06	7.29427e+06	6.77268e+06	7.23873e+06	6.08568e+06	5.45508e+06	5.84603e+06	7.02052e+06	8.8014e+06	8.52992e+06	9.58	6.53151e+06	6.65589e+06	10.36	1.35	0.43	0.0001554	3.81	0.0532196	2.53854	182.902	81.9	1.4	Up
M184T105	M184T105	1.24002e+06	680787	1.21052e+06	588769	210857	494059	303144	393849	2.79426e+06	287351	1.25669e+06	858198	1.87954e+06	1.12768e+06	846326	1.73652e+06	640250	541414	61.05	1.34832e+06	1.19219e+06	57.44	0.47	-1.07	0.0498834	1.3	0.330421	1.56474	183.543	104.5	1.7	Down
M184T291	M184T291	2.88805e+06	2.22175e+06	2.80006e+06	4.17303e+06	3.1394e+06	2.34637e+06	1.95467e+06	2.39472e+06	1.65164e+06	1.14084e+06	1.83035e+06	1.80883e+06	1.72231e+06	2.15111e+06	2.38379e+06	1.12401e+06	2.73976e+06	2.59739e+06	25.43	1.72661e+06	1.76557e+06	25.35	1.59	0.67	0.0018648	2.73	0.096514	2.08031	184.06	291.4	4.9	Up
M184T356	M184T356	9.41178e+06	8.85048e+06	1.36213e+07	1.53284e+07	1.44929e+07	1.33098e+07	1.1019e+07	1.15269e+07	2.29424e+06	3.12018e+06	8.88691e+06	1.04418e+07	6.27757e+06	9.05029e+06	6.81912e+06	8.4234e+06	1.21951e+07	1.24184e+07	19.39	6.91419e+06	7.62126e+06	42.11	1.76	0.82	0.0018648	2.73	0.096514	1.95295	184.097	356.4	5.9	Up
M184T362	M184T362	6.17626e+06	8.62023e+06	6.71369e+06	4.99638e+06	9.39966e+06	4.72133e+06	7.08932e+06	6.32867e+06	7.56531e+06	1.99165e+07	8.98905e+06	7.63885e+06	9.63977e+06	8.45549e+06	1.28034e+07	9.16359e+06	6.75569e+06	6.52118e+06	23.95	1.05215e+07	9.07632e+06	39.31	0.64	-0.64	0.0104118	1.98	0.169968	1.85133	184.17	362.4	6	Down
M184T72	M184T72	248554	604797	437354	625362	245087	671523	582215	675676	578563	1.18305e+06	1.41647e+06	1.42673e+06	1.50771e+06	1.18667e+06	296682	1.43098e+06	511321	593506	35.05	1.12836e+06	1.30157e+06	39.75	0.45	-1.14	0.0281274	1.55	0.261699	1.7434	183.963	71.7	1.2	Down
M184T777	M184T777	918084	952963	790014	230551	823765	1.67248e+06	1.3889e+06	909067	2.37155e+06	3.34742e+06	1.58853e+06	1.46831e+06	2.31512e+06	1.25109e+06	1.13399e+06	3.26348e+06	960728	913575	44.43	2092437	1.95183e+06	41.76	0.46	-1.12	0.004662	2.33	0.129379	1.96738	184.17	777.4	13	Down
M185T100	M185T100	2.35603e+07	2.4631e+07	1.37243e+07	1.58125e+07	3.2772e+06	3.98838e+07	1.68026e+07	1.69132e+07	8.61799e+06	4.59747e+06	7.78316e+06	1.0964e+07	1.22493e+07	7.1837e+06	4.2732e+06	8.97617e+06	1.93256e+07	1.68579e+07	54.7	8.08062e+06	8.20058e+06	34.47	2.39	1.26	0.0104118	1.98	0.169968	1.68581	185.129	100.2	1.7	Up
M185T111	M185T111	3.50258e+06	2.67402e+06	3.69706e+06	2.78806e+06	3.20777e+06	2.20387e+06	4.65153e+06	4.54389e+06	3.38616e+06	3.45247e+06	5.6963e+06	4.14366e+06	5.8522e+06	4.9476e+06	6.70886e+06	3.89792e+06	3.4086e+06	3.35518e+06	25.63	4.76065e+06	4.54563e+06	25.88	0.72	-0.48	0.0379176	1.42	0.297283	1.7092	185.092	110.8	1.8	Down
M185T372	M185T372	1.86448e+06	2.27351e+06	4.14537e+06	5.48328e+06	1.80224e+06	2.78405e+06	4.13362e+06	2.94685e+06	2.02395e+06	2.4778e+06	1.97734e+06	1.6083e+06	703321	2.28847e+06	1.07796e+06	1.52131e+06	3.17917e+06	2.86545e+06	40.85	1.70981e+06	1.79282e+06	35.32	1.86	0.89	0.0206682	1.68	0.228643	1.91617	185.129	371.8	6.2	Up
M185T575	M185T575	991632	1.17093e+06	418663	921411	579593	745013	1.30921e+06	714128	1.10048e+06	1.71427e+06	1.00444e+06	1.16825e+06	1.14104e+06	1.26875e+06	1.53199e+06	833518	856323	833212	34.96	1.22034e+06	1.15464e+06	23.24	0.7	-0.51	0.0498834	1.3	0.330421	1.64312	185.115	574.6	9.6	Down
M185T85	M185T85	2.66614e+07	2.00348e+07	1.53148e+07	3.01697e+07	2.0768e+07	2.63117e+07	2.39419e+07	2.59479e+07	3.91282e+07	3.97543e+07	2.79541e+07	2.50679e+07	3.84932e+07	3.04459e+07	3.1236e+07	2.60521e+07	2.36438e+07	2.49449e+07	19.89	3.22665e+07	3.0841e+07	18.72	0.73	-0.45	0.0104118	1.98	0.169968	1.88519	185.077	85	1.4	Down
M186T757	M186T757	2.27991e+06	1.46958e+06	3.86301e+06	2.77165e+06	1.86512e+06	1.45895e+06	1.91338e+06	1.72374e+06	1.2526e+06	1.95579e+06	901887	614429	2.07192e+06	1.42766e+06	1.0285e+06	1.20082e+06	2.16817e+06	1.88925e+06	37.37	1.3067e+06	1.22671e+06	38.33	1.66	0.73	0.0206682	1.68	0.228643	1.75467	185.985	757.1	12.6	Up
M186T91	M186T91	1.01383e+06	900283	1.08887e+06	948641	762839	1.18637e+06	830651	796285	1.52858e+06	829984	1.5369e+06	1.43804e+06	1.23917e+06	1.00074e+06	980949	1.10213e+06	940971	924462	15.76	1.20706e+06	1.17065e+06	22.44	0.78	-0.36	0.0498834	1.3	0.330421	1.60203	186.054	90.9	1.5	Down
M188T105	M188T105	2.21801e+06	2.9142e+06	6.79044e+06	2.46646e+06	5.3847e+06	1.93746e+06	2.08161e+06	2.0549e+06	4.47625e+06	3.58569e+06	9.73956e+06	4.60904e+06	1.06863e+07	2.78869e+06	4.34711e+06	3.32106e+06	3.23097e+06	2.34223e+06	56.58	5.44421e+06	4.41168e+06	55.44	0.59	-0.75	0.0498834	1.3	0.330421	1.48632	188.091	105.1	1.8	Down
M188T332	M188T332	1.07257e+06	1.31155e+06	982588	1.15766e+06	874553	1.13676e+06	1.1307e+06	947689	273771	895082	242269	282917	254454	870138	820110	907380	1.07676e+06	1.10163e+06	12.88	568265	551513	57.57	1.89	0.92	0.000621601	3.21	0.069967	1.99724	188.165	332.5	5.5	Up
M189T103	M189T103	2.31324e+06	2.27012e+06	2.17667e+06	2.21516e+06	2.22138e+06	2.0312e+06	2.19806e+06	2.24374e+06	2.35321e+06	2.30099e+06	2.41618e+06	2.46282e+06	2.34867e+06	2.31147e+06	2.31901e+06	2.18099e+06	2.2087e+06	2.21827e+06	3.78	2.33667e+06	2.33384e+06	3.58	0.95	-0.08	0.0104118	1.98	0.169968	1.87953	189.123	102.7	1.7	Down
M189T366	M189T366	6.89512e+06	5.97329e+06	7.04303e+06	9.22107e+06	3.85707e+06	8.77574e+06	5.01725e+06	8.6439e+06	4.45325e+06	5.32803e+06	5.81256e+06	3.57863e+06	1.40949e+06	1.58012e+06	3.64924e+06	5.42413e+06	6.92831e+06	6969076	27.62	3.90443e+06	4.05125e+06	43.38	1.77	0.83	0.00699301	2.16	0.14968	1.84037	189.123	366.3	6.1	Up
M189T397	M189T397	4.87653e+07	3.54783e+07	5.00092e+07	4.03771e+07	5.44744e+07	4.47424e+07	4.77154e+07	6.22269e+07	6.70244e+07	9.96807e+07	6.71977e+07	8.7676e+07	8.90655e+07	5.19178e+07	4.11658e+07	6.43194e+07	4.79736e+07	4.82404e+07	17.16	7.10059e+07	6.7111e+07	27.95	0.68	-0.57	0.0104118	1.98	0.169968	1.872	189.074	397.2	6.6	Down
M189T62	M189T62	2.27459e+07	1.20388e+07	1.28962e+07	1.19438e+07	1.14516e+07	1.22159e+07	1.05542e+07	1.03337e+07	1.24302e+07	1.67233e+07	1.31153e+07	2.59098e+07	2.36619e+07	1.59575e+07	1.26124e+07	1.26765e+07	1.30225e+07	1.19913e+07	30.87	16635876	1.45364e+07	31.95	0.78	-0.35	0.014763	1.83	0.200021	1.32425	188.997	62	1	Down
M189T82	M189T82	8.704e+07	8.67171e+07	8.22465e+07	1.05296e+08	6.99207e+07	8.98537e+07	9.54101e+07	9.94012e+07	1.19356e+08	1.52534e+08	1.18296e+08	9.46585e+07	1.09058e+08	9.45112e+07	1.01163e+08	9.0878e+07	8.94856e+07	8.84468e+07	12.19	1.10057e+08	1.0511e+08	18.45	0.81	-0.3	0.0206682	1.68	0.228643	1.67761	189.16	81.7	1.4	Down
M190T106_2	M190T106_2	1.53508e+07	1.59842e+07	1.43153e+07	2.23786e+07	2.58907e+07	1.63167e+07	1.87666e+07	1.90422e+07	1.33315e+07	1.37766e+07	1.57853e+07	1.45525e+07	1.55447e+07	1.19192e+07	1.18225e+07	1.7172e+07	1.85056e+07	1.75416e+07	21.28	1.4238e+07	1.41646e+07	13.29	1.3	0.38	0.014763	1.83	0.200021	1.88847	190.144	106.2	1.8	Up
M191T62	M191T62	9.79371e+07	1.14504e+08	1.18698e+08	1.31006e+08	9.74874e+07	1.17277e+08	1.29693e+08	1.21711e+08	8.87091e+07	1.09108e+08	8.92079e+07	8.528e+07	8.83937e+07	8.70777e+07	8.74186e+07	8.99052e+07	1.16039e+08	1.17988e+08	10.93	9.06375e+07	8.85514e+07	8.38	1.28	0.36	0.000621601	3.21	0.069967	2.43128	190.992	62	1	Up
M192T105	M192T105	1.03724e+07	1.75161e+07	1.3366e+07	1.31587e+07	1.92964e+07	1.65531e+07	2.45759e+07	2.50593e+07	4.0793e+06	1.76402e+07	4.88511e+06	3.65236e+06	3.29027e+06	5.31475e+06	7.62858e+06	5.04275e+06	1.74872e+07	1.70346e+07	30.42	6.44167e+06	4.96393e+06	73.23	2.71	1.44	0.0029526	2.53	0.116769	2.39571	192.056	104.5	1.7	Up
M192T78	M192T78	2.12243e+06	2.83767e+06	3.01947e+06	2.58992e+06	4.22888e+06	1.42602e+06	4.90147e+06	3.97526e+06	3.29496e+06	7.94583e+06	6.80511e+06	6.84409e+06	3.06347e+06	3.89121e+06	5.73232e+06	7.40114e+06	3.13764e+06	2.92857e+06	36.87	5.62226e+06	6.26871e+06	34.56	0.56	-0.84	0.014763	1.83	0.200021	1.82401	192.08	77.9	1.3	Down
M193T173	M193T173	5.97353e+06	6.29576e+06	6.56922e+06	6.18101e+06	7.0164e+06	8.25718e+06	8.6946e+06	7.91311e+06	5.67403e+06	6.46752e+06	5.85042e+06	6.84614e+06	5.6779e+06	6.2256e+06	4.87056e+06	6.54274e+06	7.1126e+06	6.79281e+06	14.64	6.01936e+06	6.03801e+06	10.48	1.18	0.24	0.0379176	1.42	0.297283	1.71667	193.068	172.6	2.9	Up
M193T308	M193T308	1.2974e+06	1.55695e+06	1.21916e+06	1.70347e+06	1.01633e+06	976935	1.69446e+06	1.59226e+06	1.96835e+06	1.51618e+06	2.59168e+06	2.15719e+06	1.92676e+06	763594	1.72509e+06	1.93288e+06	1382120	1.42718e+06	21.31	1.82272e+06	1.92982e+06	29.12	0.76	-0.4	0.0379176	1.42	0.297283	1.14812	192.982	308.5	5.1	Down
M194T309	M194T309	817993	1.39992e+06	507511	827262	1.77775e+06	1.64368e+06	1.24364e+06	1.19296e+06	653518	443421	1.41403e+06	472791	751650	512067	357444	576828	1.17634e+06	1.2183e+06	37.09	647719	544447	51.47	1.82	0.86	0.0206682	1.68	0.228643	1.85811	193.98	308.6	5.1	Up
M194T82	M194T82	5.71258e+06	4.88184e+06	6.03709e+06	5.94443e+06	4.95797e+06	7.76309e+06	6.15587e+06	6.02534e+06	2.29376e+07	7.15653e+06	2.30065e+07	2.48464e+07	2.09231e+07	6.2949e+06	6.58797e+06	7.58735e+06	5.93478e+06	5.98488e+06	14.97	1.49176e+07	1.42552e+07	57.89	0.4	-1.33	0.0018648	2.73	0.096514	1.9146	194.032	82.1	1.4	Down
M194T84	M194T84	3.03697e+06	2.92042e+06	2.9208e+06	2.51056e+06	2.77763e+06	2.5986e+06	2.49333e+06	2.78378e+06	2.72217e+06	2.93711e+06	3.09677e+06	3.43993e+06	3.29229e+06	3.36867e+06	2.89078e+06	3.28609e+06	2.75526e+06	2.7807e+06	7.37	3.12923e+06	3.19143e+06	8.24	0.88	-0.18	0.014763	1.83	0.200021	1.97568	194.102	84.4	1.4	Down
M195T609	M195T609	549556	330164	435434	766060	563951	318335	386173	389263	149028	163735	335311	310182	230203	497583	528353	102434	467367	412348	32.35	289604	270192	54.9	1.61	0.69	0.0379176	1.42	0.297283	1.63614	195.092	609.4	10.2	Up
M195T750	M195T750	7.01255e+06	4.37356e+06	3.13135e+06	1.92099e+06	1.01356e+06	3.14703e+06	2.35366e+06	1.27569e+06	5.42431e+06	2.19018e+06	1.01962e+07	2.49903e+06	5.21255e+06	6.57177e+06	7.40474e+06	4.94056e+06	3.02855e+06	2.7425e+06	64.27	5.55491e+06	5.31843e+06	46.73	0.55	-0.88	0.0498834	1.3	0.330421	1.6203	195.138	749.5	12.5	Down
M196T437	M196T437	192665	213844	188496	265568	389822	265457	369385	372552	133168	243109	116570	81754.9	90884.4	181284	273838	221966	282224	265513	29.76	167822	157226	43.42	1.68	0.75	0.0281274	1.55	0.261699	1.83978	196.091	436.9	7.3	Up
M196T730	M196T730	287279	251353	369372	1.04985e+06	566773	774592	373895	628897	559203	227354	627208	426231	187011	210982	163854	160607	537752	470334	51.05	320306	219168	59.1	1.68	0.75	0.0498834	1.3	0.330421	1.52389	196.052	729.6	12.2	Up
M197T387	M197T387	280577	229469	405449	338996	524138	365363	269555	336882	66205.7	456763	77691.3	91752.1	74971.3	270957	208225	338936	343804	337939	26.8	198188	149989	73.99	1.73	0.79	0.0498834	1.3	0.330421	1.72002	197.111	386.7	6.4	Up
M197T74	M197T74	67627.4	95897.8	107712	145951	94140.1	70702.1	69772.7	127348	88746.6	132616	150562	153743	100237	163705	161488	95061.7	97393.9	95018.9	29.39	130770	141589	24.05	0.74	-0.43	0.0498834	1.3	0.330421	1.44149	196.928	73.6	1.2	Down
M198T102_1	M198T102_1	1.43493e+06	1.38479e+06	1.39758e+06	1.68809e+06	1.63469e+06	1.46514e+06	1.52473e+06	1.39244e+06	1.15996e+06	1.24212e+06	1.3689e+06	1.43923e+06	1.1273e+06	402294	1.32524e+06	963027	1.4903e+06	1.45003e+06	7.78	1.12851e+06	1.20104e+06	29.23	1.32	0.4	0.0018648	2.73	0.096514	1.53542	197.988	102	1.7	Up
M198T105	M198T105	893503	1.43239e+06	1.24454e+06	1.41076e+06	1.22171e+06	1.52965e+06	1.18896e+06	1.26693e+06	313304	1.23378e+06	895133	1.4653e+06	532147	941296	769250	256630	1.27355e+06	1.25573e+06	15.27	800854	832192	53.07	1.59	0.67	0.0379176	1.42	0.297283	1.74288	198.06	104.6	1.7	Up
M199T323	M199T323	1.96954e+06	1.4352e+06	4.01211e+06	2.60752e+06	1.55419e+06	2.32296e+06	2.64808e+06	1.13698e+06	2.32486e+06	2.52019e+06	1.09257e+06	1.19286e+06	1.11038e+06	644042	778362	734938	2.21082e+06	2146254	41.35	1.29977e+06	1.10147e+06	55.57	1.7	0.77	0.0281274	1.55	0.261699	1.65194	199.108	323.2	5.4	Up
M199T395	M199T395	144527	567621	141950	119087	35010.8	236080	95369.8	159212	14954.4	53808.3	14426.5	98151.7	39216	74713.6	66721.1	6320.01	187357	143239	87.47	46038.9	46512.2	71.64	4.07	2.02	0.004662	2.33	0.129379	1.95532	199.008	395.4	6.6	Up
M199T91	M199T91	616475	591970	602908	623458	593979	545209	589801	594864	682336	677998	743132	716951	639721	754046	605290	643439	594833	594422	3.94	682864	680167	7.69	0.87	-0.2	0.000621601	3.21	0.069967	2.2401	199.047	90.8	1.5	Down
M200T400_1	M200T400_1	445920	548105	862045	577971	835800	551815	613268	571653	1.64927e+06	1.0966e+06	3.80459e+06	4.22056e+06	1.34107e+06	426482	775665	1.05349e+06	625822	574812	23.32	1.79597e+06	1.21883e+06	79.02	0.35	-1.52	0.0206682	1.68	0.228643	1.77317	199.88	399.6	6.7	Down
M200T400_2	M200T400_2	2.52489e+09	4.23894e+09	2.99421e+09	1.29739e+09	1.72532e+09	3.62119e+09	3.03743e+09	4.04804e+09	5.6227e+09	5.34098e+09	4.14226e+09	4.08781e+09	5.32076e+09	2.7266e+09	3.07259e+09	4.79932e+09	2.93593e+09	3.01582e+09	35.81	4.38913e+09	4.47079e+09	24.53	0.67	-0.58	0.0206682	1.68	0.228643	1.67187	200.047	399.5	6.7	Down
M200T400_3	M200T400_3	1.96199e+06	2.6394e+06	2.63419e+06	4.62071e+06	2.23369e+06	3.92364e+06	4.36093e+06	4.05984e+06	1.07723e+06	1.68415e+06	1.55883e+06	7.05362e+06	1.00289e+06	2.37226e+06	2.14935e+06	1.75732e+06	3.3043e+06	3.28152e+06	31.62	2.33196e+06	1.72074e+06	84.25	1.42	0.5	0.0281274	1.55	0.261699	1.49039	200.214	399.6	6.7	Up
M200T648	M200T648	2.83829e+07	2.17077e+07	2.19383e+07	1.94247e+07	8.54171e+06	2.0073e+07	1.6706e+07	6.78378e+06	1.53878e+07	1.1214e+07	6.15269e+06	1.30513e+07	7.2388e+06	7.0284e+06	6.48111e+06	1.26726e+07	1.79448e+07	1.97488e+07	39.98	9.90333e+06	9.22641e+06	36.31	1.81	0.86	0.0206682	1.68	0.228643	1.63482	200.165	647.7	10.8	Up
M200T770	M200T770	715671	1.51324e+06	802660	221110	509371	1.51433e+06	777806	1.35613e+06	1.91331e+06	2.39676e+06	1.36095e+06	1.33447e+06	2.00204e+06	965209	1.2595e+06	1.40308e+06	926291	790233	52.06	1.57942e+06	1.38202e+06	30.05	0.59	-0.77	0.0498834	1.3	0.330421	1.70874	200.172	770.5	12.8	Down
M201T573_2	M201T573_2	2.14837e+07	3.08658e+07	1.98488e+07	1.37906e+07	2.23783e+07	4.45096e+07	3.20625e+07	3.58678e+07	6.62395e+07	5.81606e+07	4.03925e+07	3.36319e+07	5.1709e+07	2.19632e+07	2.63386e+07	5.59125e+07	2.76009e+07	2.66221e+07	36.24	4.42935e+07	4.60507e+07	36.34	0.62	-0.68	0.0379176	1.42	0.297283	1.59551	200.856	573.1	9.6	Down
M201T779	M201T779	2.40596e+06	994719	2.11843e+06	1.24273e+06	1.65483e+06	1.41996e+06	1.65716e+06	1.92731e+06	874307	617112	1.03209e+06	820611	1.20034e+06	1.66967e+06	930423	558120	1677636	1.65599e+06	27.68	962834	902365	36.68	1.74	0.8	0.00699301	2.16	0.14968	1.98645	201.196	779	13	Up
M202T111	M202T111	2.60322e+06	1.67388e+06	2.71378e+06	1.74548e+06	1.97821e+06	1.89254e+06	1.75747e+06	1.4752e+06	6.51029e+06	2.21872e+06	7.14141e+06	8.89427e+06	8.07541e+06	1.68711e+06	2.22418e+06	2.67693e+06	1.97997e+06	1.82501e+06	22.49	4.92854e+06	4.59361e+06	61	0.4	-1.32	0.0281274	1.55	0.261699	1.82852	202.082	110.9	1.8	Down
M202T122	M202T122	2.22582e+08	2.03928e+08	2.67559e+08	2.11158e+08	2.56137e+08	2.22896e+08	2.61447e+08	2.56745e+08	3.40965e+08	4.06544e+08	5.03818e+08	3.3541e+08	2.73814e+08	2.33417e+08	3.20373e+08	2.47418e+08	2.37806e+08	2.39516e+08	10.6	3.3272e+08	3.27891e+08	26.78	0.71	-0.48	0.0104118	1.98	0.169968	1.9059	202.18	121.9	2	Down
M202T228	M202T228	2.5627e+06	873029	2.91968e+06	2.1596e+06	2.08718e+06	2.7533e+06	2.37623e+06	2.50265e+06	2.10127e+06	890380	650670	536748	611820	684497	2.05208e+06	2.63024e+06	2.2793e+06	2.43944e+06	27.76	1.26971e+06	787438	66.52	1.8	0.84	0.0206682	1.68	0.228643	1.70511	202.071	227.9	3.8	Up
M202T233	M202T233	1.73826e+07	1.55726e+07	1.2008e+07	1.77956e+07	1.41005e+07	1.45764e+07	1.87646e+07	1.92614e+07	7.83902e+06	2.02761e+07	1.07686e+07	5.03781e+06	7.1773e+06	1.18728e+07	1.20491e+07	1.30328e+07	1.61827e+07	1.64776e+07	15.65	1.10067e+07	1.13207e+07	42.37	1.47	0.56	0.0206682	1.68	0.228643	1.76746	202.108	232.8	3.9	Up
M202T260	M202T260	4.45967e+07	5.58736e+07	4.57685e+07	4.643e+07	8.361e+07	6.66252e+07	7.19139e+07	6.90637e+07	3.30719e+07	3.18542e+07	1.27739e+07	3.34962e+07	3.68413e+07	4.15065e+07	3.4859e+07	4.04011e+07	6.04852e+07	6.12494e+07	23.91	3.31005e+07	3.41776e+07	26.92	1.83	0.87	0.0001554	3.81	0.0532196	2.1532	202.108	260.2	4.3	Up
M202T356	M202T356	3.66922e+07	5.47119e+07	2.6817e+07	3.24401e+07	5.93163e+07	4.75386e+07	5.99736e+07	5.53479e+07	2.45576e+07	2.11608e+07	3.26525e+07	1.60592e+07	3.26837e+07	2.68495e+07	2.14001e+07	2.07549e+07	4.66047e+07	5.11252e+07	27.79	2.45148e+07	2.29788e+07	24.13	1.9	0.93	0.0029526	2.53	0.116769	2.29593	202.107	356.4	5.9	Up
M202T400	M202T400	6.77564e+08	2.7123e+08	9.20787e+08	6.98114e+08	1.488e+09	4.59928e+08	6.16111e+08	9.07048e+08	1.52718e+09	2.16283e+09	2.60729e+09	1.34151e+09	9.81965e+08	4.04141e+08	1.12012e+09	9.92408e+08	7.54847e+08	6.87839e+08	48.48	1.39218e+09	1.23081e+09	50.57	0.54	-0.88	0.0281274	1.55	0.261699	1.49572	202.044	399.5	6.7	Down
M202T624	M202T624	514564	1.38466e+06	501996	832524	200495	1.01141e+06	569970	534070	213534	290546	163780	569995	274338	325988	312611	411177	693711	552020	53.12	320246	301579	39.07	2.17	1.12	0.0281274	1.55	0.261699	1.83257	202.217	623.7	10.4	Up
M202T725	M202T725	404482	223231	224283	244299	400114	329301	293942	300408	163754	294092	245899	231202	204117	181360	211835	248730	302507	297175	23.87	222624	221519	18.62	1.36	0.44	0.0379176	1.42	0.297283	1.71183	201.674	725.4	12.1	Up
M203T122	M203T122	4.8928e+07	6.88403e+07	4.27341e+07	5.70565e+07	2.64752e+07	4.98355e+07	6.37795e+07	4.95421e+07	1.85134e+07	1.8016e+07	1.77636e+07	3.36731e+07	1.86461e+07	8.97018e+07	4.49041e+07	4.83508e+07	5.08989e+07	4.96888e+07	25.68	3.61961e+07	2.61596e+07	69.14	1.41	0.49	0.0498834	1.3	0.330421	1.41438	203.183	121.9	2	Up
M203T91	M203T91	720628	330103	295753	278686	170487	423237	249643	250874	1.46464e+06	503222	818489	1.00583e+06	1.31902e+06	318484	671496	1.31615e+06	339926	287219	50.03	927167	912158	45.16	0.37	-1.45	0.0029526	2.53	0.116769	2.21627	203.053	90.9	1.5	Down
M204T117	M204T117	5.2119e+07	4.70659e+07	5.29791e+07	4.75876e+07	3.69588e+07	5.14098e+07	5.01913e+07	4.71332e+07	5.71967e+07	4.74811e+07	5.81402e+07	5.17002e+07	5.22514e+07	5.29827e+07	4.79522e+07	5.34373e+07	4.81806e+07	4.88894e+07	10.57	5.26427e+07	5.2617e+07	7.23	0.92	-0.13	0.0379176	1.42	0.297283	1.36092	204.087	116.6	1.9	Down
M204T122	M204T122	4.65856e+09	2.78248e+09	2.51938e+09	3.54718e+09	2.51106e+09	2.72715e+09	1.64418e+09	3.57883e+09	4.71201e+09	2.22479e+09	4.75711e+09	4.8858e+09	5.40933e+09	3.1367e+09	5.29439e+09	4.06916e+09	2.9961e+09	2.75481e+09	30.42	4.31116e+09	4.73456e+09	25.79	0.69	-0.52	0.0281274	1.55	0.261699	1.62381	204.122	121.5	2	Down
M204T474	M204T474	271576	116167	98563.1	336812	140816	63526.2	185206	74199.2	2.81055e+06	327110	231615	205915	300116	1.60297e+06	1.1054e+06	159755	160858	128492	60.85	842929	313613	112.77	0.19	-2.39	0.014763	1.83	0.200021	1.84928	204.069	473.7	7.9	Down
M205T116	M205T116	2.82356e+06	4.93546e+06	4.08985e+06	1.40017e+06	2.21838e+06	5.32891e+06	4.42939e+06	4.23812e+06	7.74869e+06	8.08405e+06	5.41104e+06	5.38092e+06	5.84949e+06	2.6771e+06	3.12473e+06	9.40746e+06	3.68298e+06	4.16398e+06	37.57	5.96044e+06	5.63027e+06	39.63	0.62	-0.69	0.0281274	1.55	0.261699	1.47195	205.09	116.4	1.9	Down
M205T122	M205T122	3.80538e+08	3.19848e+08	5.44146e+08	4.72446e+08	4.86654e+08	3.55427e+08	5.32304e+08	3.89125e+08	3.51601e+08	1.05588e+08	1.28445e+08	3.13706e+08	4.47669e+08	3.44927e+08	1.16662e+08	5.14931e+08	4.35061e+08	4.30786e+08	19.45	2.90441e+08	3.29316e+08	54.12	1.5	0.58	0.0379176	1.42	0.297283	1.55933	205.126	121.5	2	Up
M205T203	M205T203	1.63201e+06	442359	2.30902e+06	3.13859e+06	1.91463e+06	4.142e+06	2.06723e+06	2.77231e+06	1.18368e+06	1.66448e+06	1.20578e+06	986856	699638	1.23753e+06	867015	889065	2.30227e+06	2.18813e+06	47.63	1.09176e+06	1.08527e+06	27.41	2.11	1.08	0.014763	1.83	0.200021	1.6515	204.98	203.3	3.4	Up
M205T77	M205T77	62597.3	2639.11	74050.8	965.668	123657	7712.91	5087.04	7102.55	110140	240093	288095	21242	75714.9	6786.39	120086	90128	35476.6	7407.73	129.47	119036	100134	82.92	0.3	-1.75	0.0379176	1.42	0.297283	1.68814	204.957	77	1.3	Down
M205T98	M205T98	2.75666e+06	802058	6.91152e+06	8.29748e+06	2.09068e+06	7.86815e+06	6.41546e+06	3.90123e+06	1.23782e+06	426352	1.00202e+06	327886	572667	3.5229e+06	2.32846e+06	2.07544e+06	4.8804e+06	5.15835e+06	58.45	1.43669e+06	1.11992e+06	77.96	3.4	1.76	0.0104118	1.98	0.169968	1.90081	205.101	98.2	1.6	Up
M206T122	M206T122	5.64357e+07	6.9092e+06	7.86134e+06	3.09461e+07	2.51283e+07	4.97376e+07	7.41031e+06	6.52936e+06	4.96147e+07	3.22473e+07	4.28069e+07	5.02901e+07	4.83422e+07	5.93381e+07	6.09647e+07	4.33327e+07	2.38697e+07	1.64948e+07	85.23	4.83671e+07	4.89784e+07	19.15	0.49	-1.02	0.0281274	1.55	0.261699	1.92664	206.127	121.5	2	Down
M206T99	M206T99	1.33805e+07	8.0799e+06	1.32536e+07	1.31469e+07	7.60713e+06	9.78851e+06	9.15606e+06	1.02817e+07	5.80495e+06	7.93453e+06	7.37749e+06	1.29248e+07	7.9362e+06	1.08603e+07	6.21378e+06	5.52647e+06	1.05868e+07	1.00351e+07	22.41	8072321	7.65601e+06	32.07	1.31	0.39	0.0379176	1.42	0.297283	1.48304	206.102	98.9	1.6	Up
M208T346	M208T346	1.98651e+06	175837	1.3303e+06	767877	1.20714e+06	237950	676656	572574	1.49949e+07	9.03846e+06	2.49422e+07	1.88093e+07	1.04613e+07	169062	2.64111e+06	2.78617e+06	869355	722267	69.97	1.04803e+07	9.74988e+06	82.87	0.08	-3.59	0.0104118	1.98	0.169968	1.96199	208.133	346.4	5.8	Down
M208T616_1	M208T616_1	492715	1.57111e+06	545770	128630	1.46329e+06	579636	1.08179e+06	1.50267e+06	2.34558e+06	1.98383e+06	1.91921e+06	718476	1.98937e+06	1.55855e+06	566079	1.69024e+06	920702	830713	60.19	1.59642e+06	1.80473e+06	39.71	0.58	-0.79	0.0206682	1.68	0.228643	1.39211	207.67	616.3	10.3	Down
M209T260	M209T260	1.4213e+06	971016	1.4135e+06	1.8202e+06	2.24838e+06	4.56015e+06	3.16488e+06	2.1063e+06	923782	632101	1.50664e+06	1.28815e+06	1.00558e+06	1.10379e+06	1.61189e+06	1.22923e+06	2.21321e+06	1963250	52.33	1.16265e+06	1.16651e+06	27.33	1.9	0.93	0.0206682	1.68	0.228643	1.81517	208.992	259.6	4.3	Up
M209T355	M209T355	1.14374e+06	399868	754673	578715	453803	334757	396321	483085	1.28713e+06	1.04378e+06	1.36777e+06	717149	906120	552768	1.196e+06	1.403e+06	568120	468444	46.99	1.05922e+06	1.11989e+06	29.45	0.54	-0.9	0.00699301	2.16	0.14968	2.10339	209.129	355	5.9	Down
M209T357	M209T357	5.16114e+06	5.93517e+06	1.1417e+07	1.01034e+07	5.49104e+06	7.92339e+06	1.20611e+07	7.02651e+06	6.09746e+06	6.61169e+06	5.05961e+06	4.45368e+06	6.10688e+06	5.93115e+06	3.56737e+06	2.87421e+06	8.13985e+06	7.47495e+06	33.49	5.08776e+06	5.49538e+06	26.48	1.6	0.68	0.0281274	1.55	0.261699	1.85386	209.103	356.7	5.9	Up
M209T366	M209T366	4.10758e+06	5.56714e+06	5.03066e+06	5.84465e+06	8.11305e+06	8.21033e+06	4.42258e+06	4.50242e+06	3.35682e+06	1.94174e+06	3.51855e+06	2.32957e+06	3.88642e+06	3.44181e+06	1.67124e+06	2.46418e+06	5.7248e+06	5.2989e+06	28.17	2.82629e+06	2.9105e+06	29.17	2.03	1.02	0.0001554	3.81	0.0532196	2.38868	209.128	366.4	6.1	Up
M209T396	M209T396	2.14042e+07	8.34317e+07	2.25386e+07	1.15654e+07	2.58661e+07	2.89719e+07	2.29717e+07	2.6355e+07	1.31663e+07	7.73663e+06	2.12606e+07	1.76605e+07	1.79003e+07	1.32856e+07	1.67813e+07	6.01478e+06	3.03881e+07	2.44189e+07	72.57	1.42258e+07	1.50335e+07	36.9	2.14	1.1	0.004662	2.33	0.129379	1.73558	209.137	396.2	6.6	Up
M209T693	M209T693	1.09115e+06	400878	486369	2.88532e+06	1.91924e+06	400263	523618	368079	249741	210250	330777	371885	241260	1.18799e+06	632015	99503.8	1.00936e+06	504994	91.84	415427	290259	84.01	2.43	1.28	0.0379176	1.42	0.297283	1.4872	209.117	692.9	11.5	Up
M209T810	M209T810	3.48188e+06	5.03701e+06	3.53637e+06	1.60315e+06	3.35634e+06	2.48127e+06	5.21854e+06	2.23797e+06	6.15195e+06	4.62911e+06	5.29452e+06	5.5585e+06	6.92351e+06	4.21482e+06	4.38793e+06	6.4442e+06	3.36907e+06	3.41911e+06	37.93	5.45057e+06	5.42651e+06	18.37	0.62	-0.69	0.004662	2.33	0.129379	2.03915	209.19	810.4	13.5	Down
M210T103	M210T103	9.43303e+06	1.02662e+07	1.20655e+07	1.00002e+07	7.27335e+06	8.29442e+06	8.97032e+06	8.23358e+06	7.58503e+06	3.46096e+06	6.91217e+06	7.96693e+06	6.80808e+06	9.81739e+06	7.30472e+06	5.57566e+06	9.31708e+06	9.20167e+06	15.95	6.92887e+06	7.10845e+06	26.65	1.34	0.43	0.0104118	1.98	0.169968	1.70224	210.043	102.9	1.7	Up
M210T309	M210T309	3.33369e+06	4.83944e+06	4.29786e+06	3.02827e+06	3.80776e+06	5.21331e+06	4.82134e+06	3.82891e+06	5.80389e+06	5.01988e+06	5.30447e+06	4.44761e+06	4.89409e+06	3.89576e+06	4.39604e+06	5.14045e+06	4.14632e+06	4.06338e+06	18.73	4.86277e+06	4.95698e+06	12.31	0.85	-0.23	0.0498834	1.3	0.330421	1.42208	209.985	308.8	5.1	Down
M210T485	M210T485	315629	771477	693823	177014	191687	759170	670237	198007	421586	800535	742620	939009	705271	743535	686453	851464	472131	492933	58.05	736309	743077	20.6	0.64	-0.64	0.0498834	1.3	0.330421	1.60797	210.111	484.9	8.1	Down
M211T108	M211T108	127336	91995.8	152129	99721.2	120212	93904.5	92173.8	74215.5	284019	109670	342633	408505	213275	105761	136056	165682	106461	96812.8	23.46	220700	189479	51.36	0.48	-1.05	0.00699301	2.16	0.14968	1.92228	211.071	107.9	1.8	Down
M212T136	M212T136	3.19643e+07	5.76025e+07	4.75976e+07	5.16894e+07	5.11255e+07	4.59572e+07	5.08867e+07	5.36163e+07	1.42285e+07	4.05446e+07	1.48231e+07	1.50035e+07	1.42955e+07	2.94773e+07	3.1095e+07	3.66393e+07	4.88049e+07	5.10061e+07	15.71	2.45133e+07	2.22404e+07	45.39	1.99	0.99	0.000621601	3.21	0.069967	2.26518	212.003	136.5	2.3	Up
M212T354	M212T354	4.91393e+06	7.73062e+06	3.98468e+06	4.46426e+06	6.12537e+06	5.21443e+06	6.16686e+06	6.17603e+06	1.48622e+06	4.36886e+06	2.53787e+06	2.64515e+06	2.07995e+06	4.19418e+06	4.09551e+06	4.26927e+06	5.59702e+06	5.6699e+06	21.34	3.20963e+06	3.37033e+06	35.79	1.74	0.8	0.0018648	2.73	0.096514	2.08715	212.149	353.5	5.9	Up
M212T91_1	M212T91_1	102835	86322.7	106521	48006.8	56002.7	78631.5	33977.8	33661	99433.6	45583.5	183771	110169	162943	1.00489e+06	96262.4	115811	68244.8	67317.1	42.99	227358	112990	139.42	0.3	-1.74	0.0206682	1.68	0.228643	1.5842	212.043	90.7	1.5	Down
M213T108	M213T108	4.09848e+06	3.83572e+06	5.84523e+06	3.99092e+06	2.0162e+06	4.21845e+06	3.93051e+06	3.96901e+06	1.09569e+06	2.13069e+06	3.00977e+06	2.86919e+06	2.35689e+06	2.48561e+06	3.15996e+06	3.15298e+06	3.98807e+06	3.97997e+06	25.83	2.5326e+06	2.6774e+06	27.43	1.57	0.66	0.00699301	2.16	0.14968	1.79198	213.123	108.5	1.8	Up
M213T309	M213T309	3.09879e+06	1.41198e+06	3.70644e+06	2.30914e+06	4.55792e+06	1.27699e+06	2.06798e+06	2.44854e+06	5.9931e+06	5.09739e+06	9.79792e+06	4.77965e+06	3.72013e+06	1.75404e+06	4.88419e+06	4.81085e+06	2.60972e+06	2.37884e+06	43.1	5.10466e+06	4.84752e+06	44.55	0.51	-0.97	0.00699301	2.16	0.14968	1.82083	212.987	309	5.2	Down
M213T377	M213T377	706166	1.00683e+06	756448	657124	2.3115e+06	585804	1.05006e+06	1.01878e+06	489843	149637	197439	207595	612565	537516	462628	559899	1.01159e+06	881638	54.87	402140	476236	46.27	2.52	1.33	0.0003108	3.51	0.0568482	2.08797	212.987	376.8	6.3	Up
M214T384	M214T384	1.07906e+06	896855	993801	1.07837e+06	794143	914675	1.08842e+06	953294	708507	701492	884790	923106	987801	769016	958062	779002	974827	973547	10.8	838972	831896	13.51	1.16	0.22	0.0379176	1.42	0.297283	1.60862	214.107	384.4	6.4	Up
M214T412	M214T412	593699	1.39918e+06	1.03063e+06	1.36792e+06	945132	1.16078e+06	1.07848e+06	752752	634305	462322	573092	1.27085e+06	692708	843374	706306	857117	1.04107e+06	1.05455e+06	26.76	755009	699507	32.59	1.38	0.46	0.0498834	1.3	0.330421	1.58805	214.107	411.8	6.9	Up
M214T96	M214T96	2.33836e+07	2.36004e+07	1.80891e+07	1.76291e+07	9.97454e+06	2.04218e+07	1.9857e+07	2.026e+07	1.18613e+07	1.05637e+07	9.46633e+06	1.09683e+07	9.26412e+06	1.64433e+07	1.42817e+07	1.05161e+07	1.91519e+07	2.00585e+07	22.39	1.16706e+07	1.0766e+07	21.32	1.64	0.71	0.004662	2.33	0.129379	2.15104	214.051	96.4	1.6	Up
M215T573	M215T573	784543	1.46527e+06	1.01459e+06	851921	1.42137e+06	921845	1.09087e+06	1.68602e+06	2.00038e+06	1.96737e+06	2.05826e+06	2.05477e+06	2.27124e+06	1.24017e+06	1.09808e+06	1.81579e+06	1.15455e+06	1.05273e+06	28.47	1.81326e+06	1.98388e+06	23.09	0.64	-0.65	0.004662	2.33	0.129379	1.94222	214.53	573.1	9.6	Down
M215T722	M215T722	345946	947606	1.39245e+06	701100	868123	979609	589459	668702	634934	712258	495974	306171	454052	549202	528802	657173	811625	784612	38.57	542321	539002	23.8	1.5	0.58	0.0379176	1.42	0.297283	1.47917	215.164	722.4	12	Up
M215T76	M215T76	8.10569e+06	6.76116e+06	7.08342e+06	8.05633e+06	2.72444e+06	1.07514e+07	5.93462e+06	8.84252e+06	4.64727e+06	2.63131e+06	3.84481e+06	4.6784e+06	7.24286e+06	2.69079e+06	2.9081e+06	5.85427e+06	7.28245e+06	7.56987e+06	32.27	4.31223e+06	4.24604e+06	38.06	1.69	0.76	0.014763	1.83	0.200021	1.71656	215.087	75.7	1.3	Up
M215T82	M215T82	5.79718e+06	8.5038e+06	3.69846e+06	7.31039e+06	2.01296e+07	6.46423e+06	5.57271e+06	5.37091e+06	3.03437e+06	5.0463e+06	3.4932e+06	3.8059e+06	3.441e+06	2.36137e+06	2.71284e+06	3.11255e+06	7.85592e+06	6.13071e+06	65.65	3.37594e+06	3.27678e+06	24.14	2.33	1.22	0.000621601	3.21	0.069967	2.13324	214.85	82.1	1.4	Up
M216T116	M216T116	1.96117e+06	6.32071e+06	8.74788e+06	5.1275e+06	2.95569e+06	5.30553e+06	6.02412e+06	4.64969e+06	9.1851e+06	5.83677e+06	1.33296e+07	8.28873e+06	7.29075e+06	7.24819e+06	3.22995e+06	9.03806e+06	5.13654e+06	5.21652e+06	40.53	7.93089e+06	7.78974e+06	36.74	0.65	-0.63	0.0379176	1.42	0.297283	1.33439	216.087	115.9	1.9	Down
M216T593	M216T593	3.09268e+06	3.91387e+06	3.51018e+06	3.9632e+06	1.73188e+06	1.83262e+06	3.72505e+06	3.88678e+06	4.17437e+06	2.84883e+06	5.01258e+06	3.78882e+06	5.19639e+06	3.99917e+06	3.83945e+06	4.10781e+06	3.20703e+06	3.61761e+06	28.8	4.12093e+06	4.05349e+06	17.83	0.78	-0.36	0.0379176	1.42	0.297283	1.39426	216.159	592.6	9.9	Down
M216T608	M216T608	137682	193301	203588	59240.2	77560.3	76086.8	157451	147370	213716	330392	198668	334522	211358	285112	292019	199564	131535	142526	41.82	258169	249414	22.71	0.51	-0.97	0.000621601	3.21	0.069967	2.21066	216.069	608.4	10.1	Down
M216T626	M216T626	981899	748974	769553	1.24504e+06	912496	609869	780065	805924	358598	394727	556580	721514	208434	1.16242e+06	886952	87173.6	856728	792994	22.42	547050	475653	65.89	1.57	0.65	0.0498834	1.3	0.330421	1.51487	215.587	626.3	10.4	Up
M216T699	M216T699	6.07905e+06	4.59023e+06	4.70774e+06	5.33206e+06	4.18238e+06	3.15843e+06	4.52484e+06	4.17984e+06	1.72733e+06	1.18288e+06	4.92147e+06	3.19711e+06	3.31382e+06	4.58541e+06	4.13578e+06	1.32022e+06	4.59432e+06	4.55754e+06	18.71	3.048e+06	3.25547e+06	48.6	1.51	0.59	0.0498834	1.3	0.330421	1.60769	216.159	698.9	11.6	Up
M217T440	M217T440	586786	814247	790706	467561	432056	652701	627981	615299	1.06725e+06	931025	883110	896380	851685	613804	590149	1.05655e+06	623417	621640	21.66	861245	889745	20.68	0.72	-0.47	0.0206682	1.68	0.228643	1.81806	217.097	440.2	7.3	Down
M217T557	M217T557	3.41308e+07	2.96431e+07	1.49952e+07	2.47192e+07	3.22366e+07	1.10971e+07	2.7699e+07	1.60121e+07	2.06415e+07	1.88179e+07	2.07335e+07	1.18705e+07	6.71215e+06	6.90545e+06	2.08624e+07	4.65816e+06	2.38166e+07	2.62091e+07	36.45	1.39002e+07	1.53442e+07	51.23	1.71	0.78	0.0498834	1.3	0.330421	1.55039	217.107	557.4	9.3	Up
M217T655	M217T655	4.39094e+06	4.32043e+06	7.47969e+06	4.4269e+06	2.51157e+06	3.71249e+06	3.11692e+06	5.67712e+06	2.27354e+06	4.25846e+06	2.18804e+06	6.44406e+06	2.85845e+06	1.90251e+06	1.68831e+06	2.42134e+06	4.45451e+06	4.35568e+06	34.76	3.00434e+06	2.34744e+06	53.24	1.48	0.57	0.0281274	1.55	0.261699	1.51646	217.199	655.5	10.9	Up
M217T699	M217T699	642463	111733	583484	388387	156730	53572.3	148764	218797	64752	75100	32275	151665	135875	104804	98901.1	216550	287991	187764	77.7	109990	101853	52.36	2.62	1.39	0.0498834	1.3	0.330421	1.43166	217.163	698.8	11.6	Up
M217T86	M217T86	4.66402e+06	5.37305e+06	5.44271e+06	6.09278e+06	5.01966e+06	6.56391e+06	5.25488e+06	5.99208e+06	3.74356e+06	5.14181e+06	3.45794e+06	3.08172e+06	3.25327e+06	3.7943e+06	4.21967e+06	4.52169e+06	5.55039e+06	5.40788e+06	11.22	3.90175e+06	3.76893e+06	17.73	1.42	0.51	0.000621601	3.21	0.069967	2.38982	217.065	85.9	1.4	Up
M218T113	M218T113	1.4724e+06	614659	1.17173e+06	756714	897341	391907	833884	798823	2.64234e+06	2.07639e+06	2.61634e+06	1.46428e+06	1.07315e+06	723439	2.114e+06	1.55258e+06	867182	816354	38.19	1.78281e+06	1.81448e+06	39.15	0.49	-1.04	0.014763	1.83	0.200021	2.01254	218.122	113.3	1.9	Down
M219T113	M219T113	3.70507e+06	6.26193e+06	5.16426e+06	6.86882e+06	5.30048e+06	6.93892e+06	6.7955e+06	6.56315e+06	1.32553e+06	4.1157e+06	5.60138e+06	2.29535e+06	2.74964e+06	3.55451e+06	3.08017e+06	4.29429e+06	5.94976e+06	6.41254e+06	19.15	3.37707e+06	3.31734e+06	39.13	1.76	0.82	0.0029526	2.53	0.116769	2.09708	219.134	112.7	1.9	Up
M219T767	M219T767	713644	625268	1.56857e+06	844550	439678	1.10046e+06	418271	359533	685422	345369	153354	359004	614636	340775	131854	240643	758747	669456	54.04	358882	343072	55.76	2.11	1.08	0.00699301	2.16	0.14968	1.76733	219.095	767.4	12.8	Up
M219T82	M219T82	7.36065e+06	1.38131e+07	3.99089e+06	1.05548e+07	3.37538e+07	8.68254e+06	6.96331e+06	6.74877e+06	3.21607e+06	5.90317e+06	6.0193e+06	4.44166e+06	5.627e+06	5.05982e+06	3.73935e+06	4.0715e+06	1.14835e+07	8.02159e+06	82.36	4.75973e+06	4.75074e+06	22.09	2.41	1.27	0.004662	2.33	0.129379	1.85374	219.083	82.1	1.4	Up
M219T88	M219T88	1.95534e+06	2.0661e+06	2.17526e+06	2.60623e+06	2.23653e+06	2.11799e+06	2.21287e+06	2.19688e+06	1.65069e+06	1.45179e+06	2.0843e+06	2.0931e+06	1.72391e+06	2.12403e+06	1.74356e+06	1.37149e+06	2.1959e+06	2.18607e+06	8.63	1.78036e+06	1.73374e+06	16.51	1.23	0.3	0.00699301	2.16	0.14968	2.01713	219.005	88.5	1.5	Up
M220T112	M220T112	4.49099e+06	4.57684e+06	5.27999e+06	9.21956e+06	5.43406e+06	1.04957e+07	9.07694e+06	9.37932e+06	149792	4.81123e+06	207165	254970	224367	4.03143e+06	5.69101e+06	3.00779e+06	7.24418e+06	7.2555e+06	34.7	2.29722e+06	1.63138e+06	102.48	3.15	1.66	0.004662	2.33	0.129379	1.97462	220.129	112.4	1.9	Up
M220T487	M220T487	160359	159581	159504	158880	215674	88680.1	126141	219794	591090	306355	942130	400062	281937	98572.4	233511	422314	161077	159543	26.65	409496	353209	63.38	0.39	-1.35	0.00699301	2.16	0.14968	1.85599	220.064	486.7	8.1	Down
M220T533	M220T533	6.02975e+06	3.54589e+06	5.15017e+06	6.66344e+06	4.24263e+06	3.39175e+06	3.84758e+06	3.61084e+06	2.18199e+06	1.87099e+06	1.80863e+06	1.53874e+06	1.25765e+06	4.07997e+06	3.2517e+06	3.31366e+06	4.56026e+06	4.0451e+06	27.28	2.41292e+06	2.02649e+06	41.75	1.89	0.92	0.0018648	2.73	0.096514	2.12628	220.097	533.1	8.9	Up
M220T691	M220T691	1.77607e+06	844320	936319	1.61502e+06	1.35765e+06	865310	822343	975554	530041	333935	704551	674175	566684	1.37386e+06	750306	120447	1.14907e+06	955936	33.04	631750	620429	57.9	1.82	0.86	0.004662	2.33	0.129379	1.70399	220.177	691.1	11.5	Up
M220T91	M220T91	646740	955310	880193	986321	869717	1.25573e+06	850577	1.14913e+06	575002	681131	105859	754529	626656	592343	526633	344218	949214	917752	19.81	525797	583672	39.56	1.81	0.85	0.000621601	3.21	0.069967	1.8434	220.025	90.8	1.5	Up
M221T114	M221T114	752694	1.25704e+06	931628	468125	780032	1.34956e+06	1.30105e+06	1.00741e+06	2.03011e+06	2.49286e+06	1.49245e+06	1.30121e+06	1.83827e+06	994434	1.04487e+06	2.62976e+06	980943	969519	31.61	1.728e+06	1.66536e+06	36.23	0.57	-0.82	0.0104118	1.98	0.169968	1.8782	221.013	114.3	1.9	Down
M221T378	M221T378	2.0465e+06	1.66491e+06	1.71712e+06	2.18956e+06	2.08491e+06	1.71856e+06	1.7301e+06	1.49187e+06	1.152e+06	1.07905e+06	1.28086e+06	1.46515e+06	1.49545e+06	635150	1.87726e+06	960850	1.83044e+06	1.72433e+06	13.35	1.24322e+06	1.21643e+06	30.42	1.47	0.56	0.004662	2.33	0.129379	1.96366	221.09	377.6	6.3	Up
M221T394	M221T394	1.27637e+06	876395	1.13218e+06	924810	1.02894e+06	1.22299e+06	1.33878e+06	857878	1.63718e+06	1.35642e+06	1.86989e+06	1.46648e+06	996145	1.27634e+06	1.23793e+06	2.02173e+06	1.08229e+06	1.08056e+06	17.33	1.48276e+06	1.41145e+06	23.08	0.73	-0.45	0.014763	1.83	0.200021	1.85949	221.103	394.1	6.6	Down
M222T101_1	M222T101_1	551861	160777	171946	177694	405458	181060	455479	503411	485496	464187	536978	583926	461648	485768	452675	534059	325961	293259	51.8	500592	485632	9.24	0.65	-0.62	0.0498834	1.3	0.330421	1.83261	222.079	100.5	1.7	Down
M222T302	M222T302	379205	34267.1	48577.4	46582.2	42704.5	33252.8	39283.3	45890.9	671104	389233	92066.1	873388	535501	71796.2	57871.8	54903.8	83720.4	44297.7	142.77	343233	240650	94.02	0.24	-2.04	0.0018648	2.73	0.096514	1.7356	222.123	301.5	5	Down
M222T335	M222T335	5.16433e+07	5.04784e+07	4.40695e+07	6.38274e+07	5.41407e+07	5.65528e+07	6.60975e+07	5.13544e+07	8.26194e+06	5.71247e+07	1.11084e+07	2.84821e+07	6.74265e+06	4.13495e+07	5.57351e+07	4.91088e+07	5.47705e+07	5.2892e+07	13.24	3.22391e+07	3.49158e+07	66.57	1.7	0.76	0.0379176	1.42	0.297283	1.66061	222.112	334.6	5.6	Up
M222T347	M222T347	1.54371e+06	2.50917e+06	1.2884e+06	2.2431e+06	2.60118e+06	2.07352e+06	3.65712e+06	3.58857e+06	1.06875e+06	2.3157e+06	1.29192e+06	161005	340690	1.68611e+06	1.31746e+06	1.6775e+06	2.4381e+06	2.37614e+06	35.13	1.23239e+06	1.30469e+06	57.85	1.98	0.98	0.0206682	1.68	0.228643	1.68214	222.095	347.4	5.8	Up
M222T388_1	M222T388_1	1.38765e+07	1.45105e+07	1.41084e+07	1.0615e+07	1.14182e+07	1.20379e+07	8.3465e+06	6.63594e+06	8.9208e+06	8.64871e+06	7.05393e+06	1.74865e+06	5.23683e+06	1.05127e+07	7.46994e+06	9.48238e+06	1.14436e+07	1.17281e+07	24.75	7.38424e+06	8.05933e+06	37.83	1.55	0.63	0.0206682	1.68	0.228643	1.49484	221.671	387.9	6.5	Up
M222T677	M222T677	285773	878195	916197	243196	971789	809150	855261	325413	838248	306590	110684	763160	623690	221708	69685.6	244701	660622	832206	47.75	397308	275646	75.59	1.66	0.73	0.0498834	1.3	0.330421	1.28259	221.685	677	11.3	Up
M222T91	M222T91	1.42634e+07	1.44305e+07	1.52901e+07	1.50687e+07	1.42871e+07	1.4502e+07	1.49946e+07	1.50429e+07	1.55932e+07	1.45314e+07	1.50467e+07	1.56325e+07	1.54996e+07	1.59353e+07	1.54337e+07	1.55566e+07	1.47349e+07	1.47483e+07	2.75	1.54036e+07	1.55281e+07	2.79	0.96	-0.06	0.004662	2.33	0.129379	1.87198	222.097	91	1.5	Down
M223T113	M223T113	2.51394e+06	2.45973e+06	1.81312e+06	3.07559e+06	2.27562e+06	2.54366e+06	3.47745e+06	3.51037e+06	919200	3.09921e+06	944718	111285	977264	1.99956e+06	1.9354e+06	2.0485e+06	2.70869e+06	2.5288e+06	22	1.50439e+06	1.45633e+06	62.28	1.8	0.85	0.014763	1.83	0.200021	1.55253	223.116	113	1.9	Up
M223T127	M223T127	6.96649e+06	7.43331e+06	6.79853e+06	7.52709e+06	4.96128e+06	7.27949e+06	7.09794e+06	7.52523e+06	5.61902e+06	1.50666e+06	5.05441e+06	7.09482e+06	5.29262e+06	6.66017e+06	4.31704e+06	6.1825e+06	6.94867e+06	7.18872e+06	12.17	5.21591e+06	5.45582e+06	33.45	1.33	0.41	0.0104118	1.98	0.169968	1.40751	222.504	126.8	2.1	Up
M223T356	M223T356	2.05013e+06	1.46099e+06	1.78299e+06	1.79608e+06	1.37769e+06	1.70107e+06	2.00367e+06	1.82135e+06	1.31085e+06	1.32744e+06	1.2522e+06	1.28943e+06	1.27973e+06	1.98051e+06	1.44962e+06	1.541e+06	1.74925e+06	1.78953e+06	13.45	1.42885e+06	1.31915e+06	17.03	1.22	0.29	0.014763	1.83	0.200021	1.73992	223.125	356.4	5.9	Up
M223T395	M223T395	3.91367e+06	3.54326e+06	3.38366e+06	3.94313e+06	4.05009e+06	4.14164e+06	5.56104e+06	7.26229e+06	41729.1	3.69791e+06	486315	22276.6	229279	4.9223e+06	3.33827e+06	2.63128e+06	4.47485e+06	3.99661e+06	29.13	1.92117e+06	1.5588e+06	101.73	2.33	1.22	0.0104118	1.98	0.169968	1.67746	223.107	395.3	6.6	Up
M223T439	M223T439	9.33505e+06	9.43937e+06	1.27644e+07	1.04508e+07	4.77638e+06	6.05123e+06	9.9468e+06	4.29853e+06	2.92504e+07	1.21251e+07	1.46783e+07	1.16781e+07	1.85252e+07	1.9398e+07	7.60175e+06	6.99535e+06	8.38282e+06	9.38721e+06	35.81	1.50315e+07	1.34017e+07	48.57	0.56	-0.84	0.0379176	1.42	0.297283	1.63501	223.154	439.2	7.3	Down
M224T356	M224T356	3.30626e+06	3.29813e+06	1.22005e+06	3.40179e+06	3.89358e+06	978153	4.22999e+06	5.36896e+06	1.52188e+06	2.86621e+06	2.68482e+06	675872	1.11953e+06	2.96906e+06	935906	1.93515e+06	3.21211e+06	3.35403e+06	45.82	1.83855e+06	1.72852e+06	49.69	1.75	0.8	0.0281274	1.55	0.261699	1.34695	224.078	356.1	5.9	Up
M224T372	M224T372	863134	761472	893323	724120	423534	757270	537078	531739	444574	414790	361351	158106	371173	755225	719754	761424	686459	740695	24.71	498300	429682	44.54	1.38	0.46	0.0498834	1.3	0.330421	1.29725	224.149	372	6.2	Up
M224T582	M224T582	530805	277760	507423	1.35848e+06	285513	1.06902e+06	493040	1.42672e+06	77984.6	459485	66877	19400.2	26044.9	401090	666653	40759.2	743595	519114	63.1	219787	72430.8	114.49	3.38	1.76	0.014763	1.83	0.200021	1.96603	224.047	581.9	9.7	Up
M224T99_1	M224T99_1	211444	75199.1	1.04513e+06	118395	51749.1	125849	108571	80222.2	2.35315e+06	103874	3.07922e+06	2.14199e+06	1.52659e+06	173337	709709	236735	227069	113483	147.09	1.29058e+06	1.11815e+06	88.9	0.18	-2.51	0.014763	1.83	0.200021	1.83996	224.05	98.5	1.6	Down
M225T377	M225T377	831874	1.64137e+06	1.01249e+06	1.09382e+06	1.55722e+06	2.63264e+06	578949	1.4495e+06	1.41097e+06	564956	721260	770025	1.0196e+06	822795	785275	888717	1.34973e+06	1.27166e+06	47.07	872950	804035	29.04	1.55	0.63	0.0498834	1.3	0.330421	1.41398	225.087	377.3	6.3	Up
M225T626	M225T626	397670	393102	422237	417573	221385	477234	492741	389855	368887	171863	375169	394275	391662	302038	300662	217320	401475	407622	20.5	315234	335463	26.56	1.27	0.35	0.014763	1.83	0.200021	1.32275	224.593	626.2	10.4	Up
M225T724	M225T724	1.83904e+06	1.06404e+06	1.35182e+06	2.80151e+06	1.72745e+06	1.05444e+06	1.10706e+06	1.15103e+06	526474	533554	800752	1.00923e+06	721498	1.48169e+06	1.19682e+06	115710	1.51205e+06	1.25143e+06	39.89	798217	761125	53.7	1.89	0.92	0.014763	1.83	0.200021	1.67021	225.148	724	12.1	Up
M225T89	M225T89	1.02311e+07	7.76489e+06	7.24963e+06	1.51281e+07	1.32693e+07	1.28049e+07	9.7301e+06	9.62541e+06	1.92223e+06	6.10941e+06	2.68204e+06	529006	1.66815e+06	8.27419e+06	5.47195e+06	7.45024e+06	1.07254e+07	9.98062e+06	25.77	4.2634e+06	4.077e+06	68.54	2.52	1.33	0.0010878	2.96	0.0833774	2.00512	225.016	88.5	1.5	Up
M225T98	M225T98	1.19702e+06	1.19949e+06	1.45314e+06	1.58362e+06	1.02899e+06	997607	1.1106e+06	1.06929e+06	893446	211302	954453	888307	994297	1.18339e+06	1.06322e+06	173465	1.20497e+06	1.15381e+06	17.36	795234	923950	48.31	1.52	0.6	0.004662	2.33	0.129379	1.47325	224.624	98	1.6	Up
M225T99	M225T99	8.44225e+06	1.66507e+07	1.19288e+07	1.30688e+07	1.40241e+07	1.3041e+07	1.45448e+07	1.50592e+07	4.18679e+06	1.08538e+07	4.66678e+06	3.69472e+06	3.39881e+06	7.82534e+06	7.49024e+06	1.00549e+07	1.33449e+07	1.35464e+07	18.35	6.52142e+06	6.07851e+06	45.09	2.05	1.03	0.000621601	3.21	0.069967	2.28487	225.116	99.2	1.7	Up
M226T109	M226T109	855758	972989	837282	1.07812e+06	571101	1.06849e+06	907513	938885	734822	467349	662481	617072	922869	892850	594415	703168	903768	923199	17.79	699378	682825	21.73	1.29	0.37	0.0379176	1.42	0.297283	1.66262	226.118	109.2	1.8	Up
M226T323	M226T323	2.09034e+07	2.3228e+07	2.459e+07	3.07004e+07	2.59432e+07	3.12778e+07	2.56442e+07	2.86554e+07	1.67708e+07	2.70968e+07	1.60054e+07	1.7648e+07	1.17433e+07	2.0729e+07	2.08511e+07	2.25895e+07	2.63678e+07	2.57937e+07	13.73	1.91792e+07	1.91885e+07	24.38	1.37	0.46	0.004662	2.33	0.129379	2.00176	226.071	323.1	5.4	Up
M226T413	M226T413	876566	350158	968590	482538	287782	327440	859718	719157	739612	206806	333042	797772	242376	242961	315596	138003	608994	600848	45.66	377021	279278	66.23	1.62	0.69	0.0498834	1.3	0.330421	1.35231	226.127	413.3	6.9	Up
M227T352	M227T352	1.54937e+06	2.03433e+06	1.80373e+06	1.95752e+06	1.67178e+06	1.94126e+06	1.88365e+06	2.04525e+06	1.78988e+06	1.27472e+06	1.43115e+06	1.53894e+06	1.69074e+06	1.45929e+06	1.21477e+06	1.89648e+06	1.86086e+06	1.91246e+06	9.45	1.537e+06	1.49912e+06	15.68	1.21	0.28	0.0104118	1.98	0.169968	1.91923	227.102	351.8	5.9	Up
M227T65	M227T65	288980	267470	338045	361027	419440	378961	369826	355462	447884	529775	584034	471588	412278	344692	405452	316923	347401	358244	14.11	439078	430081	20.38	0.79	-0.34	0.0498834	1.3	0.330421	1.60621	226.895	64.8	1.1	Down
M227T659	M227T659	1.2989e+06	1.07621e+06	1.80883e+06	1.48199e+06	554024	501240	809927	1.02874e+06	760384	488679	602783	665821	864125	538408	311317	585388	1.06998e+06	1.05248e+06	42.2	602113	594086	28.04	1.78	0.83	0.0379176	1.42	0.297283	1.72776	227.129	659	11	Up
M227T779	M227T779	5.97917e+06	4.33762e+06	5.79278e+06	3.83273e+06	3.93745e+06	3.88783e+06	4.4697e+06	4.42083e+06	1.95907e+06	1.36757e+06	2.35885e+06	4.63292e+06	2.5306e+06	5.04804e+06	1.74336e+06	1.2888e+06	4.58226e+06	4.37922e+06	18.4	2.61615e+06	2.15896e+06	55.15	1.75	0.81	0.0379176	1.42	0.297283	1.99972	227.127	779	13	Up
M228T114	M228T114	1.386e+06	1.33463e+06	1.33235e+06	1.32493e+06	944168	1.39144e+06	1.30573e+06	1.35205e+06	1.59472e+06	1.46539e+06	1.8232e+06	1.76381e+06	1.51212e+06	1.39258e+06	1.52351e+06	1.63859e+06	1.29641e+06	1.33349e+06	11.21	1.58924e+06	1.55911e+06	9.27	0.82	-0.29	0.0001554	3.81	0.0532196	2.07666	227.979	114.4	1.9	Down
M228T122	M228T122	2.17656e+06	2.4128e+06	1.58349e+06	2.53214e+06	1.27427e+06	1.33815e+06	1.48806e+06	1.02897e+07	1.32197e+07	2.54919e+06	2.89581e+06	2.39577e+07	2.13075e+07	3.37458e+06	3.14248e+06	2.08198e+06	2.8869e+06	1.88003e+06	104.99	9.06612e+06	3.25853e+06	100.89	0.32	-1.65	0.0104118	1.98	0.169968	1.48031	228.097	121.6	2	Down
M228T379_1	M228T379_1	4.99903e+06	7.11956e+06	4.24689e+06	3.51644e+06	7.63347e+06	3.40161e+06	4.86549e+06	4.68349e+06	3.5986e+06	2.72683e+06	2.52717e+06	2.6366e+06	2.99066e+06	3.36883e+06	3.05725e+06	4.43356e+06	5.05825e+06	4.77449e+06	30.67	3.16744e+06	3.02395e+06	19.82	1.6	0.68	0.0029526	2.53	0.116769	2.0259	227.575	379	6.3	Up
M228T380	M228T380	332806	124988	210763	252526	266330	151566	267248	361128	539928	1.04421e+06	424946	1.20333e+06	910754	347347	351462	379796	245920	259428	33.14	650221	482437	53.47	0.38	-1.4	0.000621601	3.21	0.069967	2.18278	228.134	379.9	6.3	Down
M228T92	M228T92	8.2186e+06	9.60895e+06	2.2894e+06	1.36855e+07	7.20868e+06	1.10736e+07	1.10873e+07	1.34162e+07	8.37997e+06	3.94234e+06	1.05779e+07	9.22245e+06	1.33009e+06	1.0739e+06	870807	1.16484e+06	9.57353e+06	1.03413e+07	38.82	4570282	2.63621e+06	90.84	2.09	1.07	0.0281274	1.55	0.261699	1.71101	228.129	91.8	1.5	Up
M229T101	M229T101	751571	862818	947593	1.2652e+06	617866	1.04767e+06	1.1442e+06	1.16168e+06	677319	480945	665901	698840	389383	545413	529679	617434	974824	997631	22.73	575614	581423	18.81	1.69	0.76	0.0010878	2.96	0.0833774	2.36695	229.073	101.2	1.7	Up
M229T148	M229T148	2.72613e+09	2.63529e+09	2.64651e+09	2.65996e+09	3.19704e+09	2.52107e+09	2.76e+09	2.54033e+09	2.85295e+09	2.94503e+09	2.88198e+09	2.94287e+09	2.73413e+09	2.92305e+09	2.74867e+09	2.86213e+09	2710791534	2.65323e+09	7.84	2.86135e+09	2.87205e+09	2.86	0.95	-0.08	0.0206682	1.68	0.228643	1.40116	229.154	148.2	2.5	Down
M229T215	M229T215	7.08027e+08	1.44633e+09	7.85551e+08	1.10612e+09	1.03373e+09	1.12064e+09	1.63636e+09	1.6473e+09	5.64636e+08	1.15335e+09	4.07597e+08	2.30275e+08	6.3085e+08	1.10109e+09	8.66291e+08	1.02983e+09	1.18551e+09	1.11338e+09	30.35	7.4799e+08	7.48571e+08	45.58	1.58	0.66	0.0379176	1.42	0.297283	1.59749	229.154	215	3.6	Up
M229T471	M229T471	71470.6	179413	120279	65157.1	149591	224200	183798	166958	227969	278721	319736	168602	68254.3	241280	230632	236742	145108	158274	38.51	221492	233687	34.11	0.66	-0.61	0.0206682	1.68	0.228643	1.25593	229.028	470.9	7.8	Down
M230T114	M230T114	2.33195e+07	3.57704e+07	1.40203e+07	2.95333e+07	8.1143e+07	2.33892e+07	2.20794e+07	2.10628e+07	1.12579e+07	1.89025e+07	1.46062e+07	1.70254e+07	1.34855e+07	1.07859e+07	1.10846e+07	1.31906e+07	3.12897e+07	2.33544e+07	67.5	1.37923e+07	1.3338e+07	21.31	2.27	1.18	0.0010878	2.96	0.0833774	2.05943	229.974	114.4	1.9	Up
M230T208	M230T208	4.04183e+07	5.20015e+07	3.53689e+07	1.76351e+07	2.37264e+07	3.74328e+07	4.7974e+07	3.16276e+07	5.49487e+06	4.36629e+07	1.77024e+07	1.49853e+07	1.40532e+07	1.62957e+07	3.22597e+07	2.93097e+07	3.57731e+07	3.64009e+07	32.19	2.17205e+07	1.6999e+07	56.74	1.65	0.72	0.0379176	1.42	0.297283	1.52298	230.157	208.3	3.5	Up
M230T216	M230T216	5.79533e+07	4.25093e+07	6.46828e+07	7.33624e+07	6.75474e+07	7.43167e+07	7.07564e+07	8.60958e+07	1.05401e+08	1.32529e+08	1.50929e+08	9.00627e+07	8.18687e+07	6.33146e+07	8.96591e+07	6.71868e+07	6.7153e+07	6.91519e+07	19.17	9.76188e+07	8.98609e+07	31.44	0.69	-0.54	0.0379176	1.42	0.297283	1.68761	230.158	215.9	3.6	Down
M230T704	M230T704	3.12437e+06	1.97358e+06	2.91521e+06	6.45618e+06	5.66633e+06	3.22197e+06	4.12296e+06	2.40306e+06	1.39787e+06	1.46064e+06	1.40271e+06	3.63397e+06	1.51338e+06	3.99376e+06	3.02536e+06	748675	3.73546e+06	3.17317e+06	42.29	2.14705e+06	1.48701e+06	56.6	1.74	0.8	0.0498834	1.3	0.330421	1.66397	230.211	704.2	11.7	Up
M230T768	M230T768	9.0172e+06	8.11147e+06	5.88038e+06	1.11494e+06	3.21613e+06	1.49474e+07	1.08959e+07	1.10991e+07	1.46163e+07	1.17517e+07	1.10841e+07	1.11264e+07	1.72649e+07	1.00198e+07	1.07016e+07	1.83608e+07	8.03531e+06	8.56433e+06	56.07	1.31157e+07	1.1439e+07	24.51	0.61	-0.71	0.0281274	1.55	0.261699	1.57889	230.248	768	12.8	Down
M231T102	M231T102	2.13865e+07	1.48188e+07	2.23289e+07	3.71094e+06	2.05835e+07	3.20178e+06	2.18059e+07	1.8487e+07	2.72714e+07	1.94806e+07	3.4507e+07	2.10124e+07	2.73094e+07	4.7674e+06	2.44825e+07	2.64798e+07	1.57904e+07	1.95352e+07	50.54	2.31638e+07	2.54812e+07	37.64	0.68	-0.55	0.0498834	1.3	0.330421	1.06128	231.098	102	1.7	Down
M231T137	M231T137	3.44033e+06	3.19273e+06	2.30622e+06	5.00529e+06	6.07245e+06	2.61451e+06	2.67046e+06	1.82763e+06	2.41807e+06	2.397e+06	918071	889898	1.64508e+06	509378	3.38823e+06	505333	3.3912e+06	2.9316e+06	42.56	1.58388e+06	1.28157e+06	66.9	2.14	1.1	0.014763	1.83	0.200021	1.86533	230.982	136.8	2.3	Up
M231T180	M231T180	2.4541e+07	2.49853e+07	2.71315e+07	4.21283e+07	2.4045e+07	2.83774e+07	2.50082e+07	2.52627e+07	2.2872e+07	1.6042e+07	2.6053e+07	2.20744e+07	1.98729e+07	2.1793e+07	2.36592e+07	4.89356e+06	2.76849e+07	2.51354e+07	21.71	1.96575e+07	2.19337e+07	33.78	1.41	0.49	0.0029526	2.53	0.116769	1.46032	231.16	179.5	3	Up
M231T390	M231T390	274997	508016	366037	310415	1.15414e+06	444015	584327	541354	937542	1.55166e+06	1.23408e+06	859297	1.25711e+06	456098	828200	391223	522912	476016	53.13	939401	898419	42.49	0.56	-0.85	0.0379176	1.42	0.297283	1.63258	231.17	389.5	6.5	Down
M231T409	M231T409	699833	2.483e+06	737649	1.22055e+06	8.91925e+06	2.27692e+06	3.19256e+06	2.86379e+06	1.39759e+06	723546	2.79633e+06	1.01913e+06	1.18446e+06	442107	569773	625771	2.79919e+06	2.37996e+06	94.65	1.09484e+06	871337	69.56	2.56	1.35	0.0498834	1.3	0.330421	1.53307	231.17	408.9	6.8	Up
M231T643	M231T643	477013	372853	486456	636190	571076	381923	490709	454120	234966	81049.2	366608	448556	130847	637123	385857	70569.8	483793	481735	18.24	294447	300787	68.01	1.64	0.72	0.0379176	1.42	0.297283	1.65164	231.179	642.6	10.7	Up
M231T780	M231T780	2.30378e+06	3.89794e+06	2.12903e+07	3.9193e+06	4.4212e+06	2.00778e+07	2.48325e+07	3.35785e+06	3.05015e+06	6.05583e+06	3.88671e+06	2.27237e+06	1.49634e+06	3.69875e+06	1.99458e+06	2.29695e+06	1.05126e+07	4.17025e+06	92.06	3.09396e+06	2.67355e+06	47.06	3.4	1.76	0.0206682	1.68	0.228643	1.6162	231.101	780.3	13	Up
M232T116	M232T116	598725	854183	627989	675652	731441	620649	907674	776767	402412	683925	539206	475942	343165	501880	354156	618965	724135	703547	15.78	489956	488911	24.96	1.48	0.56	0.0029526	2.53	0.116769	2.17363	232.081	115.8	1.9	Up
M232T582_1	M232T582_1	2.78616e+06	3.31245e+06	1.46838e+06	2.60152e+06	3.60001e+06	1.42761e+06	1.99727e+06	1.83499e+06	1.33119e+06	965732	1.92708e+06	1.8061e+06	1.55726e+06	1.82548e+06	2.34139e+06	913896	2.37855e+06	2.2994e+06	34.65	1.58351e+06	1.68168e+06	31.07	1.5	0.59	0.0498834	1.3	0.330421	1.54427	232.17	582	9.7	Up
M232T82	M232T82	5.72209e+06	5.67336e+06	6.65907e+06	6.55643e+06	5.32881e+06	6.53094e+06	4.95928e+06	5.14401e+06	4.79652e+06	5.72432e+06	1.31938e+06	1.46121e+06	5.35031e+06	1.59466e+06	5.22318e+06	1.78427e+06	5.82175e+06	5.69773e+06	11.65	3.40673e+06	3.2904e+06	59.16	1.71	0.77	0.0206682	1.68	0.228643	1.81066	231.989	81.7	1.4	Up
M233T102	M233T102	1.37148e+06	1.11487e+06	1.40025e+06	1.34493e+06	804820	1.60917e+06	1.18371e+06	1.23858e+06	53339.1	1.35578e+06	124433	32253	753591	1.14939e+06	901490	959293	1.25848e+06	1.29176e+06	18.89	666197	827541	78.8	1.89	0.92	0.014763	1.83	0.200021	1.54164	233.095	102	1.7	Up
M233T485	M233T485	5.44102e+06	5.24033e+06	5.16074e+06	5.55942e+06	4.95222e+06	5.60444e+06	3.23032e+06	2.3671e+06	3.44754e+06	4.14494e+06	4.79387e+06	2.15151e+06	2.30229e+06	4.16577e+06	2.32829e+06	5.16003e+06	4.69445e+06	5.20054e+06	25.81	3.56178e+06	3.79624e+06	33.37	1.32	0.4	0.0281274	1.55	0.261699	1.23548	233.185	485	8.1	Up
M233T679	M233T679	755904	752687	828506	286156	714698	645325	500691	774917	998548	912598	1.06059e+06	1.06625e+06	1.02425e+06	894835	653595	761541	657361	733693	27.44	921527	955573	16.14	0.71	-0.49	0.00699301	2.16	0.14968	1.78139	233.174	679	11.3	Down
M233T811	M233T811	1.5064e+07	1.44755e+07	2.85266e+07	1.66253e+07	8.97077e+06	9.49347e+06	1.33292e+07	1.23948e+07	6.78123e+06	1.54822e+07	8.37653e+06	1.41385e+07	8.82903e+06	8.64243e+06	2.83023e+06	1.02751e+07	1.486e+07	1.39024e+07	41.17	9.4194e+06	8.73573e+06	42.5	1.58	0.66	0.0379176	1.42	0.297283	1.50818	233.117	811.4	13.5	Up
M234T114_2	M234T114_2	630281	949048	295800	590170	2.08919e+06	724712	679135	511135	285856	497920	391597	406438	293819	241163	252026	339436	808684	654708	67.96	338532	316628	26.08	2.39	1.26	0.0018648	2.73	0.096514	2.02197	233.97	114.4	1.9	Up
M234T348	M234T348	514591	907791	889658	553702	967458	1.53553e+06	984319	952586	1.09165e+06	1.48725e+06	1.0309e+06	972774	1.59032e+06	580684	1.07999e+06	1.4682e+06	913205	930188	34.27	1.16272e+06	1.08582e+06	28.81	0.79	-0.35	0.0498834	1.3	0.330421	1.07607	234.043	348.1	5.8	Down
M234T75	M234T75	236599	219854	321125	231513	291611	261018	267589	221966	351070	270464	491931	459197	476450	449360	337123	458565	256409	248809	14.07	411770	453962	19.62	0.62	-0.68	0.000621601	3.21	0.069967	2.38836	234.145	75.1	1.3	Down
M234T89	M234T89	1.07155e+07	7.93525e+06	8.89608e+06	9.94717e+06	8.4566e+06	8.90277e+06	7.82927e+06	6.55528e+06	2.20322e+07	5.71749e+06	2.14364e+07	2.4002e+07	1.84998e+07	1.04151e+07	1.08037e+07	9.74427e+06	8.65474e+06	8.67634e+06	14.93	1.53314e+07	1.46518e+07	45.17	0.56	-0.82	0.0281274	1.55	0.261699	1.6481	234.096	89.1	1.5	Down
M234T99	M234T99	606416	600720	545300	574665	458171	665949	534286	513845	619354	601419	604053	760762	628566	617992	656728	648706	562419	559983	11.36	642197	623960	8.05	0.88	-0.19	0.014763	1.83	0.200021	1.7705	234.108	98.6	1.6	Down
M235T114	M235T114	271125	269024	306501	810157	205055	192719	214226	609256	1.61084e+06	845164	1.99623e+06	960587	452429	472550	226583	1.63667e+06	359758	270075	62.78	1.02513e+06	902875	63.52	0.35	-1.51	0.014763	1.83	0.200021	1.76669	235.075	113.8	1.9	Down
M235T392	M235T392	863842	709835	985891	527714	1.15206e+06	746237	981176	1.08138e+06	875372	2.31633e+06	1.21072e+06	1.7656e+06	2.38002e+06	836560	1.16559e+06	1.05978e+06	881017	922509	23.78	1.45125e+06	1.18816e+06	42.89	0.61	-0.72	0.0281274	1.55	0.261699	1.72998	235.108	391.6	6.5	Down
M235T406	M235T406	508946	877911	825881	411804	753538	538151	1.51689e+06	1.47092e+06	677901	409632	461466	510830	237346	328037	277577	199617	863005	789709	48.87	387801	368834	41.23	2.23	1.15	0.004662	2.33	0.129379	2.02786	234.679	406.2	6.8	Up
M235T483	M235T483	1.72731e+07	2.541e+07	2.5262e+07	1.99954e+07	2.01038e+07	1.07199e+07	1.37393e+07	1.47767e+07	2.40165e+07	1.95479e+07	2.3931e+07	2.57494e+07	2.63814e+07	2.49659e+07	2.19314e+07	2.68502e+07	1.841e+07	1.86343e+07	28.8	2.41717e+07	2.44912e+07	10.09	0.76	-0.39	0.0379176	1.42	0.297283	1.73733	235.181	483	8.1	Down
M236T309	M236T309	602469	929293	2.23222e+06	832417	2.55129e+06	1.91973e+06	1.84513e+06	849728	2.47242e+06	2.16743e+06	2.97813e+06	2.2692e+06	2.65295e+06	2.48876e+06	2.60742e+06	2.67526e+06	1.47028e+06	1.38721e+06	50.96	2.53895e+06	2.54809e+06	9.95	0.58	-0.79	0.0029526	2.53	0.116769	1.96327	236.003	309.2	5.2	Down
M236T311	M236T311	635732	271426	331620	312958	505677	405224	398856	297172	553539	434008	788916	694989	444342	353864	420062	432221	394833	365238	31.15	515242	439175	29.55	0.77	-0.38	0.0498834	1.3	0.330421	1.40191	236.04	311.4	5.2	Down
M236T350	M236T350	2.56825e+06	247673	2.39967e+06	1.16052e+06	2.58659e+06	1.16727e+06	726402	577442	2.55007e+06	2.6172e+06	3.30026e+06	3.1918e+06	2.68142e+06	1.66315e+06	2.72348e+06	2.93804e+06	1.42923e+06	1.16389e+06	66.56	2.70818e+06	2.70245e+06	18.53	0.53	-0.92	0.0029526	2.53	0.116769	1.86439	236.128	350.4	5.8	Down
M236T804	M236T804	1.49781e+06	2.32072e+06	1.46872e+06	3.38229e+06	3.33214e+06	5.0205e+06	5.31514e+06	5.60337e+06	4.56899e+06	5.86007e+06	8.05206e+06	4.63395e+06	5.3345e+06	3.96875e+06	3.75249e+06	8.96376e+06	3.49259e+06	3.35721e+06	47.91	5.64182e+06	4.98422e+06	33.84	0.62	-0.69	0.0498834	1.3	0.330421	1.54956	235.634	804.3	13.4	Down
M237T102	M237T102	1.26377e+06	1.76555e+06	1.26009e+06	2.03613e+06	2.32375e+06	2.188e+06	2.52733e+06	2.13606e+06	981480	1.30755e+06	1.81598e+06	1.44212e+06	1.14211e+06	1.68184e+06	1.37901e+06	1.35649e+06	1.93758e+06	2.08609e+06	24.3	1.38832e+06	1.36775e+06	19.36	1.4	0.48	0.0498834	1.3	0.330421	1.83013	236.928	102	1.7	Up
M237T115	M237T115	486375	219102	471618	288495	458676	174744	174481	295867	380307	589367	1.12168e+06	545903	291451	244733	766148	541628	321170	292181	41.43	560152	543765	50.64	0.57	-0.8	0.0379176	1.42	0.297283	1.57133	236.987	114.6	1.9	Down
M237T332	M237T332	1.11718e+06	723516	1.00881e+06	1.48656e+06	572514	945508	905530	966087	761011	152566	488531	864039	559661	636392	575650	392376	965714	955797	28.04	553778	567656	39.67	1.74	0.8	0.004662	2.33	0.129379	1.82206	237.098	331.5	5.5	Up
M237T392	M237T392	1.41527e+06	1.18907e+06	1.71572e+06	2.17413e+06	1.74299e+06	2.07333e+06	562757	1.45167e+06	1.4017e+06	414531	1.45577e+06	227738	369523	1.12512e+06	667064	1.50328e+06	1.54062e+06	1.5837e+06	33.46	895591	896093	59.66	1.72	0.78	0.0379176	1.42	0.297283	1.54622	237.16	392.4	6.5	Up
M237T72	M237T72	2.70711e+06	3.04995e+06	2.93442e+06	2.76159e+06	2.92285e+06	2.59306e+06	3.47702e+06	3.68723e+06	9.31923e+06	3.77811e+06	1.06559e+07	9.91797e+06	1.17575e+07	3.88192e+06	2.58965e+06	4.60678e+06	3.01665e+06	2.92864e+06	12.65	7.06339e+06	6.963e+06	52.19	0.43	-1.23	0.0104118	1.98	0.169968	1.96114	236.952	71.8	1.2	Down
M238T115_1	M238T115_1	5.97666e+06	2.81845e+06	6.7349e+06	2.76828e+06	7.10025e+06	1.93807e+06	928498	2.67899e+06	8.63225e+06	7.42138e+06	1.09573e+07	5.80616e+06	6.19686e+06	3.73847e+06	7.8557e+06	9.01762e+06	3.86801e+06	2.79336e+06	61.18	7.45322e+06	7.63854e+06	29.73	0.52	-0.95	0.0104118	1.98	0.169968	1.8842	237.982	114.6	1.9	Down
M238T350	M238T350	307513	1.09577e+06	862658	1.45209e+06	408842	1.60549e+06	1.76288e+06	1.0501e+06	153091	237224	1.24614e+06	236031	265147	384548	536902	1.27535e+06	1.06817e+06	1.07294e+06	49.73	541805	324848	84.66	1.97	0.98	0.0498834	1.3	0.330421	1.61187	238.144	350.5	5.8	Up
M238T384	M238T384	283478	328490	340369	283859	353203	329099	342210	243659	247213	220164	223510	307597	300059	317578	323170	241796	313046	328795	12.22	272636	273636	16	1.15	0.2	0.0498834	1.3	0.330421	1.34969	237.586	383.6	6.4	Up
M238T423	M238T423	575476	142324	77127.9	470583	679867	131265	158829	233329	321067	2.57109e+06	1.39718e+06	174882	539681	688449	782025	1.139e+06	308600	196079	75.11	951671	735237	80.66	0.32	-1.62	0.014763	1.83	0.200021	1.74433	237.649	422.6	7	Down
M238T72	M238T72	2.85382e+06	3.32221e+06	3.59143e+06	3.08425e+06	2.9787e+06	2.92328e+06	3.58676e+06	3.72049e+06	9.2534e+06	3.55139e+06	1.06094e+07	9.55633e+06	1.14269e+07	3.65366e+06	2.9438e+06	4.30243e+06	3.25762e+06	3.20323e+06	10.51	6.91217e+06	6.77792e+06	52.16	0.47	-1.09	0.0206682	1.68	0.228643	1.83505	237.949	71.8	1.2	Down
M239T201	M239T201	5.98032e+06	1.11501e+07	7.44778e+06	6.48286e+06	7.95846e+06	7.06455e+06	8.3689e+06	9.01299e+06	2.88762e+06	6.64391e+06	3.48179e+06	3.63171e+06	3.32946e+06	5.76343e+06	5.51481e+06	6.46274e+06	7.93324e+06	7.70312e+06	20.55	4.71443e+06	4.57326e+06	32.53	1.68	0.75	0.0010878	2.96	0.0833774	2.17221	239.105	200.6	3.3	Up
M239T606	M239T606	1.11469e+06	1.40651e+06	1.85716e+06	1.11694e+06	66688.1	2.0289e+06	420110	883039	543793	24111.3	27535.5	283370	306497	755703	151926	746482	1.11176e+06	1.11582e+06	59.92	354927	294933	83.51	3.13	1.65	0.014763	1.83	0.200021	1.49129	239.198	606.2	10.1	Up
M239T716	M239T716	2.21788e+06	2.68972e+06	2.01677e+06	2.05534e+06	2.02538e+06	2.35452e+06	1.49712e+06	1.70476e+06	1.2299e+06	984346	1.49217e+06	724981	2.0006e+06	1.19744e+06	1.48513e+06	1.62669e+06	2.07019e+06	2.04036e+06	17.83	1.34266e+06	1.35751e+06	29.52	1.54	0.62	0.0010878	2.96	0.0833774	2.01524	239.127	715.8	11.9	Up
M239T79_2	M239T79_2	1.41728e+06	6.48751e+06	1.11714e+06	1.41479e+06	1.14922e+06	1.11797e+06	1.14761e+06	1.12189e+06	4.24533e+06	1.73389e+06	5.3915e+06	6.25076e+06	4.66699e+06	1.00016e+07	1.34019e+06	1.29398e+06	1.87168e+06	1.14842e+06	99.89	4.36553e+06	4.45616e+06	68.17	0.43	-1.22	0.0281274	1.55	0.261699	1.58596	239.162	79.3	1.3	Down
M240T189	M240T189	2.24101e+06	3.06974e+06	2.20194e+06	2.50604e+06	2.69077e+06	3.43678e+06	3.15452e+06	2.17401e+06	4.93093e+06	4.65041e+06	4.45403e+06	5.09703e+06	4.70198e+06	2.44986e+06	2.87214e+06	4.41322e+06	2.68435e+06	2.59841e+06	18.13	4.1962e+06	4.55222e+06	23.37	0.64	-0.64	0.0104118	1.98	0.169968	2.05753	240.035	189	3.1	Down
M240T222	M240T222	6.98354e+06	2.97312e+06	7.39139e+06	9.3987e+06	5.21532e+06	9.5621e+06	1.05351e+07	9.07377e+06	612149	9.21246e+06	685700	769665	690056	5.8234e+06	7.72761e+06	3.27519e+06	7.64163e+06	8.23258e+06	33.32	3.59953e+06	2.02243e+06	98.21	2.12	1.09	0.0379176	1.42	0.297283	1.7535	240.034	222.4	3.7	Up
M240T782	M240T782	2.18208e+06	1.39426e+06	1.6957e+06	3.40946e+06	2.19484e+06	1.04434e+06	1.78577e+06	1.05055e+06	276124	250034	922207	1.32883e+06	370314	2.34217e+06	1.69142e+06	140170	1.84462e+06	1.74073e+06	41.92	915158	646260	88.18	2.02	1.01	0.0379176	1.42	0.297283	1.72507	240.138	781.6	13	Up
M241T105	M241T105	3.2731e+06	4.93989e+06	4.81012e+06	5.68297e+06	4.77694e+06	608504	7.02805e+06	5.25704e+06	9.32851e+06	7.23801e+06	8.13131e+06	4.09182e+06	6.75929e+06	8.02261e+06	5.96549e+06	4.97257e+06	4.54708e+06	4.87501e+06	41.86	6.8137e+06	6.99865e+06	25.55	0.67	-0.58	0.0281274	1.55	0.261699	1.30477	241.121	104.9	1.7	Down
M241T720	M241T720	998973	1.79669e+06	1.73707e+06	1.90865e+06	1.36626e+06	2.23155e+06	1.84245e+06	1.48759e+06	517226	742813	634811	843510	1.41667e+06	659227	1.2272e+06	1.13663e+06	1.67115e+06	1.76688e+06	22.6	897260	793162	36.06	1.86	0.9	0.0018648	2.73	0.096514	2.24936	241.133	719.8	12	Up
M241T90	M241T90	5.43072e+06	5.56521e+06	6.04585e+06	5.4731e+06	199435	4.2568e+06	6.23674e+06	3.31841e+06	6.4202e+06	5.76305e+06	7.17354e+06	6.17594e+06	6.17445e+06	6.92664e+06	5.78446e+06	6.18584e+06	4.56578e+06	5.45191e+06	44.01	6.32552e+06	6.18089e+06	7.93	0.72	-0.47	0.00699301	2.16	0.14968	1.10151	241.057	89.7	1.5	Down
M242T113	M242T113	6.41992e+06	7.06431e+06	5.49179e+06	5.1596e+06	5.35355e+06	4.38668e+06	6.55749e+06	6.71974e+06	924512	6.18298e+06	1.0274e+06	701938	870378	3.80083e+06	4.33186e+06	5.17715e+06	5.89413e+06	5.95585e+06	15.75	2.87713e+06	2.41411e+06	77.92	2.05	1.03	0.004662	2.33	0.129379	1.88064	242.114	113	1.9	Up
M242T125	M242T125	1.06357e+07	9.88368e+06	1.09738e+07	1.10153e+07	9.88653e+06	8.88586e+06	1.35844e+07	1.29092e+07	1.14796e+07	1.60629e+07	1.27318e+07	1.26108e+07	1.36409e+07	1.26243e+07	1.10218e+07	1.33982e+07	1.09718e+07	1.08048e+07	14.37	1.29463e+07	1.2678e+07	11.87	0.85	-0.24	0.0281274	1.55	0.261699	1.68443	242.158	124.6	2.1	Down
M242T153	M242T153	2.08053e+07	1.9599e+07	3.82757e+07	1.48236e+07	3.23048e+07	2.24403e+07	3.59373e+07	3.26063e+07	3.48269e+07	3.38534e+07	4.51886e+07	4.17574e+07	2.43313e+07	6.90011e+07	3.28157e+07	3.46938e+07	2.7099e+07	2.73726e+07	32.07	3.95585e+07	3.47604e+07	33.91	0.69	-0.55	0.0379176	1.42	0.297283	1.59114	242.158	153.3	2.6	Down
M242T90	M242T90	4.98511e+06	5.13182e+06	3.20859e+06	6.77105e+06	7.41426e+06	5.05409e+06	5.2111e+06	4.96061e+06	3.46018e+06	4.80311e+06	3.67925e+06	2.07704e+06	3.01858e+06	4.54677e+06	4.89859e+06	3.785e+06	5.34208e+06	5.09295e+06	23.79	3.78356e+06	3.73213e+06	25.43	1.41	0.5	0.004662	2.33	0.129379	1.71816	242.049	89.8	1.5	Up
M242T91	M242T91	4.59415e+06	3.5717e+06	4.84048e+06	8.46261e+06	5.28391e+06	3.52978e+06	3.39193e+06	4.1377e+06	591631	1.63342e+06	3.40819e+06	3.39158e+06	2.33902e+06	4.0031e+06	3.07315e+06	1.30218e+06	4.72653e+06	4.36593e+06	35.03	2.46779e+06	2.70609e+06	48.56	1.92	0.94	0.0018648	2.73	0.096514	1.86731	242.069	90.8	1.5	Up
M243T116_1	M243T116_1	1.83276e+06	3.084e+06	1.9118e+06	2.21763e+06	3.63773e+06	2.56779e+06	2.02456e+06	1.78747e+06	1.52459e+06	1.74029e+06	2.66865e+06	3.35913e+06	1.50008e+06	1.45836e+06	1.2637e+06	1.4524e+06	2.38297e+06	2.1211e+06	28.08	1.8709e+06	1.51234e+06	39.59	1.27	0.35	0.0498834	1.3	0.330421	1.30938	242.562	115.8	1.9	Up
M243T365	M243T365	8.53463e+06	9.43986e+06	1.03374e+07	9.15094e+06	1.68371e+07	9.67727e+06	1.03735e+07	2.43384e+07	3.97202e+07	2.07388e+07	1.83666e+07	1.08282e+07	5.66776e+07	4.14351e+07	6.83605e+07	3.71641e+07	1.23361e+07	1.00073e+07	44.63	3.66614e+07	3.84421e+07	53.51	0.34	-1.57	0.0018648	2.73	0.096514	2.15589	243.183	364.8	6.1	Down
M243T373	M243T373	424976	873859	754840	664294	802442	631670	996399	654362	233752	601702	628742	491405	343201	475012	471331	571158	725355	709567	23.88	477038	483208	27.99	1.52	0.6	0.004662	2.33	0.129379	1.8756	243.134	373.2	6.2	Up
M243T470	M243T470	158901	117116	147585	245638	105005	188608	146642	158260	1.25543e+06	69549.4	609583	404707	590718	158108	338221	222072	158469	152923	27.54	456048	371464	82.47	0.35	-1.52	0.0498834	1.3	0.330421	1.54425	243.087	470	7.8	Down
M243T89	M243T89	7.25829e+06	3.52857e+06	6.86367e+06	5.05164e+06	2.05274e+07	5.84166e+06	5.4859e+06	5.5848e+06	1.6595e+07	1.83315e+07	2.86456e+07	1.43871e+07	1.0665e+07	7.73796e+06	1.31687e+07	1.11622e+07	7.51774e+06	5.71323e+06	71.53	1.50866e+07	1.37779e+07	42.65	0.5	-1	0.00699301	2.16	0.14968	1.99141	243.027	89	1.5	Down
M244T526	M244T526	771090	1.19314e+06	150908	863639	3.18261e+06	871538	799828	797218	118095	388868	103494	654100	177710	37605.8	71252.3	134843	1.07875e+06	831734	83.22	210746	126469	98.99	5.12	2.36	0.0010878	2.96	0.0833774	2.17322	244.227	525.6	8.8	Up
M244T560	M244T560	742294	890504	859507	568689	439358	702086	752989	776952	320475	528317	289300	354875	323339	385585	554222	754221	716548	747642	20.78	438792	370230	36.58	1.63	0.71	0.00699301	2.16	0.14968	2.02235	244.154	560	9.3	Up
M244T570	M244T570	676309	1.00163e+06	945561	1.05112e+06	659840	899405	938972	731816	630574	431213	751902	474126	833523	663146	737938	897878	863081	919189	17.62	677537	700542	24.09	1.27	0.35	0.0498834	1.3	0.330421	1.57771	244.19	569.9	9.5	Up
M244T758	M244T758	1.30548e+08	1.25927e+08	1.77377e+08	1.66342e+08	2.24245e+08	1.28425e+08	1.4199e+08	1.39647e+08	6.59221e+07	3.91571e+07	9.54885e+07	1.273e+08	8.5277e+07	1.11091e+08	1.601e+08	6.64952e+07	1.54313e+08	1.40819e+08	21.87	9.38539e+07	9.03827e+07	41.07	1.64	0.72	0.004662	2.33	0.129379	1.94608	244.264	757.6	12.6	Up
M245T100_1	M245T100_1	945127	1.11058e+06	1.06953e+06	1.26647e+06	784114	1.25601e+06	1.14701e+06	1.43867e+06	843191	725057	800081	913173	926641	1.31092e+06	642453	959621	1.12719e+06	1.12879e+06	17.99	890143	878182	22.58	1.27	0.34	0.0498834	1.3	0.330421	1.65931	244.987	99.9	1.7	Up
M245T307	M245T307	1.77381e+06	1.72521e+06	1.472e+06	2.30095e+06	1.92525e+06	1.32136e+06	1.46117e+06	1.33816e+06	993890	1.29453e+06	1.77303e+06	1.51823e+06	752148	1.52219e+06	861017	943740	1.66474e+06	1.5986e+06	20.2	1.20735e+06	1.14421e+06	30.76	1.38	0.46	0.0498834	1.3	0.330421	1.75643	245.095	306.6	5.1	Up
M245T373	M245T373	2.04569e+06	1.062e+06	2.27639e+06	2.72512e+06	3.20126e+06	2.35074e+06	2.4311e+06	2.96186e+06	819782	2.78271e+06	998995	29531.7	200639	892556	1.42932e+06	500835	2.38177e+06	2.39092e+06	27.46	956796	856169	90.27	2.49	1.32	0.00699301	2.16	0.14968	1.74975	245.085	372.7	6.2	Up
M245T690_1	M245T690_1	358902	759082	738341	790192	688855	657522	1.47763e+06	774434	821339	977232	803921	1.70392e+06	1.47006e+06	1.3814e+06	1.95686e+06	2.12037e+06	780619	748712	40.21	1.40439e+06	1.42573e+06	36.06	0.56	-0.85	0.0029526	2.53	0.116769	1.83037	245.175	689.9	11.5	Down
M245T80	M245T80	3.27047e+07	4.15222e+07	3.64328e+07	2.98666e+07	2.30338e+07	3.69075e+07	2.64623e+07	3.23807e+07	3.53884e+07	3.7753e+06	6.2057e+06	2.8513e+07	2.85359e+07	2.51963e+07	4.52934e+06	2.96583e+07	3.24138e+07	3.25427e+07	18.41	2.02253e+07	2.68546e+07	64.6	1.6	0.68	0.0379176	1.42	0.297283	1.52052	244.924	80.1	1.3	Up
M246T118	M246T118	1.79668e+07	1.57949e+07	1.39613e+07	1.46811e+07	1.44992e+07	1.10757e+07	1.81507e+07	2.09248e+07	7.80308e+06	1.55568e+07	1.07507e+07	5.57107e+06	7.56555e+06	1.0043e+07	1.28544e+07	1.57884e+07	1.58818e+07	1.5238e+07	19.2	1.07416e+07	1.03968e+07	35.02	1.48	0.56	0.014763	1.83	0.200021	1.79593	246.097	117.9	2	Up
M246T119	M246T119	8.92653e+07	9.22759e+07	7.03279e+07	1.17676e+08	9.96797e+07	8.25141e+07	1.19261e+08	1.31045e+08	4.64691e+07	1.40909e+08	4.87436e+07	2.64036e+07	3.80463e+07	8.46254e+07	8.14872e+07	7.97744e+07	1.00256e+08	9.59778e+07	20.68	6.83073e+07	6.4259e+07	53.57	1.47	0.55	0.0379176	1.42	0.297283	1.60445	246.109	119.5	2	Up
M246T417	M246T417	231522	334932	295120	426061	266111	457636	376794	389062	142921	214248	196535	132378	128590	202323	257896	214628	347155	355863	22.8	186190	199429	25.02	1.86	0.9	0.0003108	3.51	0.0568482	2.42354	246.16	417.1	7	Up
M246T525	M246T525	7.74939e+06	4.27562e+06	5.59905e+06	7.37049e+06	5.98539e+06	4.84238e+06	8.52238e+06	3.48539e+06	9.02222e+06	1.17902e+07	7.42133e+06	1.31101e+07	6.36664e+06	6.6006e+06	7.65411e+06	1.03707e+07	5.97876e+06	5.79222e+06	29.72	9.04198e+06	8.33817e+06	27.58	0.66	-0.6	0.0206682	1.68	0.228643	1.82689	246.08	525.5	8.8	Down
M247T105_2	M247T105_2	2.54971e+07	3.25391e+07	2.59953e+07	1.75696e+07	2.4586e+07	3.3255e+07	3.12005e+07	3.23282e+07	3.92201e+07	4.57369e+07	3.25183e+07	3.33954e+07	3.82201e+07	2.81611e+07	2.92716e+07	4.46618e+07	2.78714e+07	2.85979e+07	19.55	3.63982e+07	3.58077e+07	18.27	0.77	-0.39	0.0206682	1.68	0.228643	1.75343	247.112	105	1.8	Down
M247T294	M247T294	545978	2.50219e+06	2.68665e+06	600410	628784	438134	484957	550992	132785	517313	63229.3	74114.9	63437.6	320278	303702	385316	1.05476e+06	575701	90.4	232522	218243	74.4	4.54	2.18	0.000621601	3.21	0.069967	2.0882	247.126	294.4	4.9	Up
M247T301_2	M247T301_2	1.05966e+06	307767	670589	746446	980227	505980	643026	662378	197472	745355	327952	618173	733197	188190	284203	222329	697009	666484	34.59	414609	306077	58.53	1.68	0.75	0.0498834	1.3	0.330421	1.58772	247.066	301.4	5	Up
M247T654	M247T654	3.64674e+06	3.03805e+06	3.1796e+06	1.74938e+06	3.12501e+06	2.21711e+06	2.28995e+06	1.06177e+06	1.62466e+06	1.77302e+06	1.0073e+06	2.04895e+06	1.41474e+06	2.67915e+06	2.28376e+06	485854	2.53845e+06	2.664e+06	33.96	1.66468e+06	1.69884e+06	42.22	1.52	0.61	0.0498834	1.3	0.330421	1.29693	247.154	654.2	10.9	Up
M247T812	M247T812	3.75472e+08	3.00194e+08	6.5679e+08	5.42318e+08	2.6368e+08	3.31522e+08	1.5427e+08	1.8003e+08	2.71954e+08	9.64571e+07	1.90184e+08	2.50635e+08	2.16099e+08	7.61468e+07	1.18482e+08	1.9699e+08	3.50535e+08	3.15858e+08	49.32	1.77118e+08	1.93587e+08	40.84	1.98	0.98	0.0281274	1.55	0.261699	1.74966	247.166	811.6	13.5	Up
M247T83	M247T83	6.15071e+06	5.13514e+06	6.16954e+06	7.16353e+06	6.28332e+06	6.61833e+06	6.72353e+06	6.88017e+06	7.60053e+06	7.29545e+06	1.05057e+07	8.87925e+06	8.62704e+06	6.93787e+06	4.55897e+06	6.90645e+06	6.39053e+06	6.45082e+06	9.71	7.66391e+06	7.44799e+06	22.79	0.83	-0.26	0.0206682	1.68	0.228643	1.17723	247.184	83	1.4	Down
M247T89	M247T89	1.47575e+07	2.52323e+07	2.05938e+07	2.16095e+07	2.26483e+07	2.28215e+07	2.44219e+07	2.78533e+07	1.39123e+07	1.72958e+07	1.80347e+07	1.13234e+07	9.93267e+06	1.43933e+07	1.50946e+07	1.72546e+07	2.24923e+07	2.27349e+07	17.16	1.46552e+07	1.4744e+07	19.87	1.53	0.62	0.0018648	2.73	0.096514	2.28943	247.057	89	1.5	Up
M248T147	M248T147	903287	602656	951168	884583	1.60033e+06	1.17623e+06	1.03385e+06	970682	1.68419e+06	1.29049e+06	1.80411e+06	1.21077e+06	1.09819e+06	1.52502e+06	1.10755e+06	1.44145e+06	1.01535e+06	960925	28.22	1.39522e+06	1.36597e+06	18.88	0.73	-0.46	0.0104118	1.98	0.169968	1.77937	248.032	146.9	2.4	Down
M248T341	M248T341	650476	691332	1.05807e+06	2.28894e+06	790930	737991	2.46291e+06	2.44382e+06	4.41936e+06	1.92512e+06	7.07156e+06	7.21769e+06	4.16732e+06	3.20931e+06	2.34374e+06	3.90437e+06	1.39056e+06	924500	60.77	4.28231e+06	4.03585e+06	45.89	0.32	-1.62	0.0029526	2.53	0.116769	2.18872	248.17	340.8	5.7	Down
M248T351	M248T351	484466	608712	610492	688459	371522	735653	727838	560931	351860	487325	397863	457425	405088	345511	490720	290310	598509	609602	20.93	403263	401475	17.89	1.48	0.57	0.00699301	2.16	0.14968	2.11771	247.652	351.1	5.9	Up
M248T541	M248T541	1.76294e+06	2.38952e+06	1.36433e+06	1.41339e+06	2.08132e+06	1.33185e+06	1.08596e+06	1.01777e+06	611942	1.54273e+06	961077	1.01603e+06	971959	570677	993678	1.62054e+06	1.55588e+06	1.38886e+06	31.03	1.03608e+06	982818	36.6	1.5	0.59	0.0206682	1.68	0.228643	1.62227	248.131	540.7	9	Up
M248T653	M248T653	105640	274158	310907	97347.5	295204	210964	149428	97026.3	306223	252419	133463	564502	397226	353390	339526	220805	192584	180196	47.73	320944	322875	40.22	0.6	-0.74	0.0379176	1.42	0.297283	1.5635	248.201	653.3	10.9	Down
M248T676	M248T676	195419	279565	302782	551181	429758	245587	145331	319367	152031	141927	256808	420164	167632	114648	143160	137378	308624	291174	42.06	191719	147596	53.01	1.61	0.69	0.0281274	1.55	0.261699	1.63121	248.249	676.4	11.3	Up
M248T90	M248T90	2.44886e+06	3.46227e+06	3.82413e+06	2.97707e+06	2.65237e+06	3.39042e+06	3.05907e+06	3.32731e+06	3.71143e+06	2.87864e+06	3.79169e+06	4.83008e+06	3.72174e+06	3.8824e+06	3.27477e+06	5.66309e+06	3.14269e+06	3.19319e+06	14.32	3.96923e+06	3.75671e+06	22.23	0.79	-0.34	0.0498834	1.3	0.330421	1.56809	248.076	90.1	1.5	Down
M250T240	M250T240	613233	4.96255e+06	1.18261e+06	575036	8.56334e+06	475796	1.52917e+06	1.49781e+06	3.62482e+06	6.61776e+06	7.53675e+06	3.96041e+06	5.99953e+06	3.15122e+06	4.1261e+06	4.54722e+06	2.42494e+06	1.34021e+06	118.53	4.94548e+06	4.33666e+06	31.87	0.49	-1.03	0.0498834	1.3	0.330421	1.87487	250.019	240.2	4	Down
M250T737	M250T737	873889	778076	478401	648184	937596	633521	540188	517034	366145	106904	273800	367262	466015	613250	542382	89409.7	675861	640852	25.22	353146	366703	53.84	1.91	0.94	0.004662	2.33	0.129379	1.82263	250.201	737.3	12.3	Up
M251T155	M251T155	2.98218e+06	2.66697e+06	3.68467e+06	2.97156e+06	2.62805e+06	3.07285e+06	4.19901e+06	3.13792e+06	2.15698e+06	2.6065e+06	2.58654e+06	2.10335e+06	1.96471e+06	3.01533e+06	2.00156e+06	2.97964e+06	3.1679e+06	3.02752e+06	16.68	2.42683e+06	2.37176e+06	17.63	1.31	0.38	0.00699301	2.16	0.14968	1.93989	251.014	155.1	2.6	Up
M251T360	M251T360	419388	460497	576357	359748	524395	396934	430138	439919	908233	586859	977320	602865	611237	430235	655826	600763	450922	435028	15.46	671667	607051	26.9	0.67	-0.57	0.0018648	2.73	0.096514	2.04992	251.091	359.8	6	Down
M251T416	M251T416	519001	1.58252e+06	746255	1.05159e+06	1.45513e+06	1.64279e+06	1.08922e+06	1.55103e+06	219562	471642	1.95938e+06	1.02658e+06	360524	467993	120775	1.03638e+06	1.20469e+06	1.27217e+06	34.86	707854	469817	85.98	1.7	0.77	0.0379176	1.42	0.297283	1.60661	250.847	416.2	6.9	Up
M252T328	M252T328	3.8309e+06	2.03241e+06	1.47508e+06	1.09029e+06	6.40908e+06	1.47788e+06	1.31177e+06	1.52773e+06	4.27061e+06	6.03702e+06	1.05087e+07	5.84305e+06	4.37087e+06	2.2702e+06	5.60235e+06	5.35763e+06	2.39439e+06	1.5028e+06	76.72	5.53256e+06	5.47999e+06	42.52	0.43	-1.21	0.0104118	1.98	0.169968	2.10348	252.099	328	5.5	Down
M252T553	M252T553	1.1264e+06	1.66554e+06	1.25195e+06	1.39513e+06	1.44328e+06	1.67573e+06	1.53568e+06	1.79012e+06	1.62798e+06	1.21744e+06	1.23612e+06	892024	1.1105e+06	1.27457e+06	1.42531e+06	731366	1.48548e+06	1.48948e+06	15.21	1.18941e+06	1.22678e+06	23.84	1.25	0.32	0.0379176	1.42	0.297283	1.5641	252.17	553.2	9.2	Up
M252T596	M252T596	5.22507e+06	5.29342e+06	8.00036e+06	6.1767e+06	3.45555e+06	4.64548e+06	4.06297e+06	3.96659e+06	3.18594e+06	4.50992e+06	3.15507e+06	4.35673e+06	3.74509e+06	2.88873e+06	1.86407e+06	2.85595e+06	5.10327e+06	4.93527e+06	28.58	3.32019e+06	3.17051e+06	26.05	1.54	0.62	0.00699301	2.16	0.14968	1.89864	252.217	596.3	9.9	Up
M252T89	M252T89	3.419e+07	2.1235e+07	3.25823e+07	3.14257e+07	1.75235e+07	2.25595e+07	3.74993e+07	3.97187e+07	1.31248e+07	1.98588e+07	7.73808e+06	1.14997e+06	1.11546e+07	2.71909e+07	2.25084e+07	1.2453e+07	2.95918e+07	3.2004e+07	27.5	1.43973e+07	1.27889e+07	58.41	2.06	1.04	0.004662	2.33	0.129379	1.66674	252.107	89.4	1.5	Up
M253T368_2	M253T368_2	943111	1.32538e+06	1.13734e+06	1.20337e+06	2.00351e+06	2.00226e+06	1.11269e+06	1.25254e+06	730646	374827	791737	574935	729267	1.02937e+06	381920	484113	1.37253e+06	1.22795e+06	29.49	637102	652101	35.41	2.15	1.11	0.0003108	3.51	0.0568482	2.38574	253.1	368.1	6.1	Up
M253T413_1	M253T413_1	7.47352e+06	5.31474e+06	4.91449e+06	1.09758e+07	3.93301e+06	6.47789e+06	4.75888e+06	7.26089e+06	7.2789e+06	3.90943e+06	3.99836e+06	3.12215e+06	3.10418e+06	1.49828e+06	3.22546e+06	3.10237e+06	6.38866e+06	5.89631e+06	35	3.65489e+06	3.1738e+06	45.13	1.75	0.81	0.00699301	2.16	0.14968	1.89978	252.677	412.8	6.9	Up
M253T76	M253T76	383457	368650	454612	328493	326448	355084	321782	317812	423641	358234	533157	476547	476528	400990	327035	394030	357042	341788	12.92	423770	412316	16.1	0.84	-0.25	0.0281274	1.55	0.261699	1.58424	253.049	76.3	1.3	Down
M254T100_3	M254T100_3	1.50554e+07	1.49914e+07	1.49851e+07	1.65607e+07	1.92036e+07	1.52507e+07	1.4549e+07	1.2184e+07	1.11184e+07	1.27534e+07	1.31752e+07	1.27185e+07	1.37574e+07	1.4282e+07	1.54369e+07	1.01647e+07	1.53475e+07	1.50234e+07	12.88	1.29258e+07	1.29643e+07	13.03	1.19	0.25	0.0281274	1.55	0.261699	1.6956	254.49	99.6	1.7	Up
M254T117	M254T117	3.74509e+06	7.84714e+06	5.84207e+06	7.51762e+06	5.70498e+06	7.14664e+06	7.38771e+06	8.1782e+06	3.11657e+06	5.25182e+06	2.32384e+06	2.26083e+06	2.00678e+06	5.1879e+06	6.19446e+06	6.59379e+06	6.67118e+06	7.26718e+06	22.16	4.117e+06	4.15223e+06	45.9	1.62	0.7	0.0104118	1.98	0.169968	1.82789	254.149	117.2	2	Up
M254T119	M254T119	4.07124e+08	3.27513e+08	4.7733e+08	5.1603e+08	3.42812e+08	5.00009e+08	4.16409e+08	4.1774e+08	2.81796e+08	3.73463e+08	2.65737e+08	1.94768e+08	2.01977e+08	2.57663e+08	2.59923e+08	4.20609e+08	4.25621e+08	4.17074e+08	16.22	2.81992e+08	2.6283e+08	27.77	1.51	0.59	0.00699301	2.16	0.14968	2.14295	254.069	119.5	2	Up
M254T343_1	M254T343_1	609113	1.04876e+06	734584	754269	700384	810742	773466	1.04842e+06	216200	709253	158212	162355	203169	449563	465300	569402	809967	763868	19.6	366682	332882	57.36	2.21	1.14	0.000621601	3.21	0.069967	2.20265	254.096	343.3	5.7	Up
M254T582	M254T582	76041.1	499451	1.49059e+06	1.18477e+06	1.21405e+06	2.59204e+06	5.2514e+06	3.09454e+06	259438	846939	133220	39866.2	53505.9	809973	1.02173e+06	81020.6	1.92536e+06	1.35232e+06	86.84	405711	196329	101.91	4.75	2.25	0.014763	1.83	0.200021	1.73918	254.058	581.8	9.7	Up
M254T721	M254T721	305741	141527	230664	161695	204877	217603	343990	149611	360262	342452	226527	340976	455099	324317	235493	208547	219464	211240	33.39	311709	332647	26.73	0.7	-0.51	0.0379176	1.42	0.297283	1.68526	254.223	720.8	12	Down
M255T107	M255T107	439575	542590	518807	584925	473575	515035	524613	474871	687875	339846	511536	458351	328222	200862	242635	240259	509249	516921	8.94	376198	334034	44.13	1.35	0.44	0.0379176	1.42	0.297283	1.67284	255.109	106.5	1.8	Up
M255T588	M255T588	432850	419075	382495	271404	412655	294381	302974	331910	244246	227942	275652	229954	294583	352005	291630	201266	355968	357202	17.81	264660	259949	18.27	1.35	0.43	0.0104118	1.98	0.169968	1.87749	255.206	588.2	9.8	Up
M255T715	M255T715	430928	430309	364887	362794	265578	375456	176188	292970	115353	143494	240770	248470	250628	330118	288316	240314	337389	363841	25.88	232183	244620	30.46	1.45	0.54	0.014763	1.83	0.200021	1.55072	255.077	714.8	11.9	Up
M255T720	M255T720	9.96883e+06	1.10271e+07	8.47191e+06	1.27002e+07	9.82819e+06	1.19683e+07	8.28111e+06	8.60275e+06	6.11689e+06	9.57659e+06	2.62681e+06	6.7234e+06	6.28411e+06	5.45185e+06	7.63436e+06	1.37918e+07	1.0106e+07	9.89851e+06	16.47	7.27573e+06	6.50375e+06	45.12	1.39	0.47	0.0281274	1.55	0.261699	1.54502	255.206	719.9	12	Up
M256T114_1	M256T114_1	1.04307e+07	7.93517e+06	6.88871e+06	1.05742e+07	1.01945e+07	1.68721e+06	9.20412e+06	8.65803e+06	4.94193e+06	1.64254e+06	1.68284e+06	1.38922e+06	3.81874e+06	4.45422e+06	4.09044e+06	4.05785e+06	8.19657e+06	8.93107e+06	35.72	3.25972e+06	3.93829e+06	44.15	2.51	1.33	0.0029526	2.53	0.116769	1.90195	256.065	113.9	1.9	Up
M256T116	M256T116	456733	267575	616802	318102	628510	235037	368676	393075	1.41952e+06	786891	1.96463e+06	932841	820610	262683	875950	816237	410564	380876	36.13	984921	848280	51.19	0.42	-1.26	0.00699301	2.16	0.14968	1.98534	256.092	115.9	1.9	Down
M256T384	M256T384	5.22418e+07	4.93779e+06	4.20418e+07	6.83207e+06	3.80858e+07	4.13519e+06	8.55688e+06	1.89995e+07	6.12538e+07	7.28397e+07	1.07032e+08	3.60427e+07	2.69055e+07	1.14395e+07	5.81344e+07	3.96316e+07	2.19789e+07	1.37782e+07	87.77	5.16599e+07	4.8883e+07	57.92	0.43	-1.23	0.0379176	1.42	0.297283	1.72485	256.176	384.3	6.4	Down
M256T72_2	M256T72_2	2.89278e+06	4.48903e+06	2.89902e+06	3.00036e+06	1.96485e+06	3.13989e+06	2.47512e+06	2.282e+06	3.41772e+06	3.34058e+06	3.28178e+06	4.92252e+06	3.31219e+06	3.26621e+06	3.91142e+06	3.84478e+06	2.89288e+06	2.8959e+06	26.23	3.66215e+06	3.37915e+06	15.55	0.79	-0.34	0.00699301	2.16	0.14968	1.64225	256.015	71.7	1.2	Down
M257T129	M257T129	1.70642e+06	2.38651e+06	2.07397e+06	2.01786e+06	1.6813e+06	1.92635e+06	2.20599e+06	2.0695e+06	3.25669e+06	2.25032e+06	4.17913e+06	3.83162e+06	3.6812e+06	2.1969e+06	2.12861e+06	1.95379e+06	2008487	2.04368e+06	11.83	2.93478e+06	2.7535e+06	30.58	0.68	-0.55	0.0206682	1.68	0.228643	1.78366	257.014	128.6	2.1	Down
M257T389_1	M257T389_1	2.41869e+07	2.55732e+07	1.52638e+07	6.46716e+06	1.93431e+07	3.6565e+07	2.95874e+07	2.78356e+07	2.70684e+07	3.31652e+07	5.68213e+07	2.57738e+07	3.87751e+07	3.30504e+07	5.07745e+07	2.82357e+07	2.31028e+07	2.48801e+07	40.25	3.6708e+07	3.31078e+07	31.18	0.63	-0.67	0.0206682	1.68	0.228643	1.65754	256.849	389.1	6.5	Down
M258T357	M258T357	7.25891e+06	6.12833e+06	7.82493e+06	7.60883e+06	1.28119e+07	9.72854e+06	1.37053e+07	1.22406e+07	3.5878e+06	5.19421e+06	1.27259e+06	1.68575e+06	1.59591e+06	6.86752e+06	6.4514e+06	3.72e+06	9.66342e+06	8.77673e+06	29.99	3.7969e+06	3.6539e+06	58.17	2.55	1.35	0.000621601	3.21	0.069967	2.18912	258.074	356.5	5.9	Up
M258T367	M258T367	118672	153413	136381	117309	152165	180891	118861	100002	190998	136359	237663	188490	199135	187547	170936	176580	134712	127621	19.45	185964	188019	15.28	0.72	-0.47	0.004662	2.33	0.129379	2.08069	258.097	367	6.1	Down
M258T488	M258T488	825227	1.02463e+06	1.01865e+06	963097	938752	292111	862635	1.07135e+06	653750	372160	413932	423054	285343	938124	620840	883612	874556	950924	28.53	573852	521947	42.15	1.52	0.61	0.0281274	1.55	0.261699	1.42294	258.116	487.7	8.1	Up
M258T774	M258T774	2.30456e+07	2.1003e+07	2.14104e+07	2.97156e+07	1.42907e+07	2.26243e+07	1.85473e+07	1.83432e+07	1.34469e+07	9.72109e+06	2.06041e+07	1.45602e+07	1.90005e+07	1.03756e+07	2.05521e+07	1.60189e+07	2.11225e+07	2.12067e+07	21.24	1.55349e+07	1.52896e+07	27.62	1.36	0.44	0.0281274	1.55	0.261699	1.6674	258.278	773.8	12.9	Up
M258T795_1	M258T795_1	1.11036e+07	8.83207e+06	1.18608e+07	1.5967e+07	1.00246e+07	1.72655e+07	1.39707e+07	1.29941e+07	7.42777e+06	1.3643e+07	3.89283e+06	4.19538e+06	4.29778e+06	7.71852e+06	8.0919e+06	1.22335e+07	1.27523e+07	1.24275e+07	22.68	7.68758e+06	7.57315e+06	47.78	1.66	0.73	0.014763	1.83	0.200021	1.89416	257.619	795.1	13.3	Up
M258T84	M258T84	1.55306e+06	1.55902e+06	1.44569e+06	1.81156e+06	1.48601e+06	1.81055e+06	1.68001e+06	1.69425e+06	2.25232e+06	1.87061e+06	2.50667e+06	2.83895e+06	2.71794e+06	1.69971e+06	1.56597e+06	2.117e+06	1.63002e+06	1.61951e+06	8.61	2.19615e+06	2.18466e+06	21.36	0.74	-0.43	0.004662	2.33	0.129379	1.93813	258.075	84.4	1.4	Down
M259T72_2	M259T72_2	2.03897e+06	2.32162e+06	2.13924e+06	2.08368e+06	1.88603e+06	2.5832e+06	2.3084e+06	2.65764e+06	3.24749e+06	3.06202e+06	2.43527e+06	2.62412e+06	2.76912e+06	2.66421e+06	2.05409e+06	2.7085e+06	2.25235e+06	2.22382e+06	11.9	2.6956e+06	2.68635e+06	13.52	0.84	-0.26	0.014763	1.83	0.200021	1.71588	258.978	71.7	1.2	Down
M259T87	M259T87	1.29823e+07	1.48713e+07	1.52827e+07	1.83855e+07	1.3914e+07	1.99011e+07	1.69695e+07	1.54607e+07	9.85916e+06	1.53585e+07	9.55959e+06	7.4856e+06	8.76807e+06	1.0234e+07	1.15552e+07	1.29559e+07	1.59709e+07	1.53717e+07	14.47	1.0722e+07	1.00466e+07	23.33	1.49	0.57	0.0018648	2.73	0.096514	2.27535	259.114	86.5	1.4	Up
M259T90	M259T90	1.67619e+07	3.37236e+07	1.88513e+07	2.14232e+07	2.02089e+07	1.91045e+07	1.98399e+07	1.91873e+07	1.73412e+07	1.85909e+07	1.75842e+07	1.90248e+07	1.78006e+07	1.67092e+07	1.79256e+07	1.66764e+07	2.11376e+07	1.95136e+07	24.86	1.77066e+07	1.76924e+07	4.67	1.19	0.26	0.00699301	2.16	0.14968	1.48639	259.07	89.7	1.5	Up
M260T107	M260T107	888221	729148	856102	1.35784e+06	1.03943e+06	1.18064e+06	926532	803952	945925	148542	159441	225344	190918	154149	132584	297894	972733	907377	21.52	281850	175180	97.08	3.45	1.79	0.0029526	2.53	0.116769	2.53799	260.112	106.8	1.8	Up
M260T115	M260T115	733204	283596	654693	434180	709132	211325	385048	367746	1.06777e+06	747661	1.76495e+06	615272	380357	371219	907200	899055	472366	409614	42.43	844185	823358	53.08	0.56	-0.84	0.0498834	1.3	0.330421	1.55932	260.088	114.6	1.9	Down
M260T345	M260T345	670677	920300	897982	954434	1.02565e+06	991504	1.32493e+06	929661	805584	808228	807006	598389	684738	886985	792449	630679	964392	942048	18.73	751757	799017	13.47	1.28	0.36	0.004662	2.33	0.129379	1.88961	260.16	345.1	5.8	Up
M260T360	M260T360	722580	206469	881848	638564	566696	616979	630585	570945	730989	738221	739915	735030	627916	736213	715540	916977	604333	623782	31.51	742600	735622	10.74	0.81	-0.3	0.0281274	1.55	0.261699	1.25371	260.162	359.8	6	Down
M260T72_1	M260T72_1	1.65868e+06	1.97147e+06	2.53028e+06	1.80075e+06	1.40206e+06	1.50494e+06	1.96078e+06	2.15936e+06	3.05505e+06	2.78417e+06	2.7825e+06	2.97015e+06	2.99599e+06	2.12179e+06	2.12228e+06	3.29787e+06	1.87354e+06	1.88076e+06	19.56	2.76622e+06	2.87716e+06	15.52	0.68	-0.56	0.0018648	2.73	0.096514	2.23678	259.974	71.9	1.2	Down
M260T723	M260T723	423436	1.15673e+06	530020	429654	458970	1.0979e+06	783003	807317	347857	474707	290390	334085	648364	294659	227862	389890	710878	656512	41.9	375977	340971	35.19	1.89	0.92	0.00699301	2.16	0.14968	1.97205	260.176	722.5	12	Up
M260T99_2	M260T99_2	715921	1.22669e+06	1.01025e+06	1.13699e+06	1.18857e+06	1.13391e+06	1.30449e+06	1.35068e+06	372697	966427	433504	341095	281047	653786	632832	871407	1.13344e+06	1.16278e+06	17.57	569099	533168	44.67	1.99	0.99	0.000621601	3.21	0.069967	2.26993	260.171	98.7	1.6	Up
M261T311	M261T311	150570	145059	73532.4	137822	113487	132440	125819	121184	178151	142330	165049	73097.4	173930	140603	160120	177819	124989	129129	19.3	151388	162585	23.04	0.83	-0.28	0.0379176	1.42	0.297283	1.02425	261.09	310.9	5.2	Down
M261T519	M261T519	869176	1.03114e+06	546499	759636	742488	361052	910785	908277	383420	1.11022e+06	854916	1.11999e+06	1.367e+06	1.05751e+06	908917	1.25472e+06	766131	814406	28.55	1.00709e+06	1.08387e+06	29.99	0.76	-0.39	0.0498834	1.3	0.330421	1.05369	261.189	519.3	8.7	Down
M261T81	M261T81	1.11943e+07	1.2558e+07	1.22096e+07	9.93734e+06	9.75071e+06	1.26139e+07	1.26862e+07	8.83152e+06	1.40023e+08	8.77394e+06	8.54008e+07	7.98449e+07	7.43442e+07	1.55914e+07	1.3926e+07	1.82644e+07	1.12227e+07	1.17019e+07	13.63	5.45211e+07	4.63043e+07	87.33	0.21	-2.28	0.0104118	1.98	0.169968	1.86269	260.898	80.5	1.3	Down
M262T109	M262T109	1.58611e+06	1.21604e+06	1.85492e+06	2.83359e+06	537965	1.39763e+06	1.26289e+06	1.17246e+06	1.23476e+06	948309	1.01782e+06	1.06915e+06	941451	720457	949724	959555	1.4827e+06	1.33026e+06	44.81	980154	954640	14.71	1.51	0.6	0.0206682	1.68	0.228643	1.36392	262.121	109.2	1.8	Up
M262T335	M262T335	1.36687e+06	1.0343e+06	4.01386e+06	1.17458e+06	653669	3.16803e+06	828811	1.07594e+06	5.79291e+06	580824	6.05293e+06	7.21149e+06	5.93694e+06	5.2014e+06	6.28392e+06	5.88798e+06	1.66451e+06	1.12526e+06	73.83	5.36855e+06	5.91246e+06	37.54	0.31	-1.69	0.0104118	1.98	0.169968	1.93369	262.165	334.9	5.6	Down
M262T573	M262T573	1.02742e+06	1.73408e+06	1.1276e+06	637890	1.02753e+06	1.72044e+06	1.69003e+06	866440	1.35554e+06	2.17234e+06	1.63664e+06	1.77872e+06	1.90328e+06	1.12312e+06	1.21936e+06	1.90999e+06	1.22893e+06	1.07757e+06	34.82	1637374	1.70768e+06	22.73	0.75	-0.41	0.0498834	1.3	0.330421	1.45033	262.18	572.6	9.5	Down
M262T91	M262T91	7.08664e+06	9.29968e+06	1.10732e+07	8.23016e+06	1.0892e+07	7.93708e+06	9.93161e+06	1.07346e+07	1.36573e+07	1.4308e+07	1.55641e+07	1.87676e+07	1.33596e+07	9.78434e+06	9.19067e+06	1.18875e+07	9.39813e+06	9.61565e+06	16.07	1.33149e+07	1.35084e+07	23.31	0.71	-0.5	0.014763	1.83	0.200021	1.91324	262.103	91	1.5	Down
M263T122	M263T122	5.12191e+06	1.65312e+07	1.46712e+07	2.11864e+07	1.10229e+07	2.21627e+07	1.13319e+07	1.06308e+07	3.4877e+07	1.98086e+07	4.01753e+07	2.98118e+07	3.21471e+07	1.4063e+07	1.08205e+07	3.45096e+07	1.40824e+07	1.30016e+07	40.81	2.70266e+07	3.09795e+07	39.73	0.52	-0.94	0.0379176	1.42	0.297283	1.64639	263.132	121.8	2	Down
M263T328	M263T328	2.31246e+06	2.14632e+06	1.67556e+06	2.09963e+06	1.10148e+06	2.56862e+06	2.67777e+06	2.86826e+06	1.38993e+06	1.19546e+06	338442	327648	1.4253e+06	1.22169e+06	1.00225e+06	361007	2.18126e+06	2.22939e+06	26.37	907717	1.09886e+06	53.49	2.4	1.26	0.0018648	2.73	0.096514	2.1035	263.069	327.5	5.5	Up
M264T281	M264T281	817610	553919	3.82394e+06	829320	5.32834e+06	543055	618031	2.78575e+06	1.04775e+07	9.01398e+06	1.65303e+07	8.71132e+06	6.64267e+06	3.02187e+06	7.24136e+06	6.43655e+06	1.9125e+06	823465	96.52	8.50944e+06	7.97634e+06	46.16	0.22	-2.15	0.000621601	3.21	0.069967	2.33637	264.144	281.1	4.7	Down
M264T534	M264T534	978984	1.00414e+06	451027	1.01385e+06	851187	1.06167e+06	697791	529289	638590	715569	465577	330239	200425	791305	394457	400004	823492	915085	28.72	492021	432790	41.43	1.67	0.74	0.014763	1.83	0.200021	1.78823	264.126	534.4	8.9	Up
M264T91	M264T91	6.31749e+06	5.0082e+06	800570	6.18118e+06	4.53288e+06	3.78642e+06	4.47374e+06	4.70629e+06	1.57377e+06	3.06953e+06	1.45315e+06	1.25044e+06	1.26171e+06	3.03538e+06	2.04034e+06	5.43433e+06	4.47585e+06	4.61959e+06	38.35	2.38983e+06	1.80705e+06	59.98	1.87	0.91	0.0498834	1.3	0.330421	1.4544	264.107	90.8	1.5	Up
M265T106_2	M265T106_2	1.29747e+06	191481	1.21656e+06	296854	2.0049e+06	153996	292829	219826	3.81906e+06	2.1487e+06	5.00831e+06	2.19243e+06	2.50593e+06	302181	2.04768e+06	2.32096e+06	709239	294842	98.86	2.54316e+06	2.25669e+06	54.2	0.28	-1.84	0.0010878	2.96	0.0833774	2.00223	265.085	105.5	1.8	Down
M265T356	M265T356	2.39417e+07	3.80637e+07	3.6478e+07	3.77781e+07	5.41342e+07	3.15629e+07	5.33554e+07	4.73782e+07	1.07347e+07	2.7941e+07	994804	2.67902e+06	2.61773e+06	2.68303e+07	3.00431e+07	1.25412e+07	4.03365e+07	3.79209e+07	26.2	1.42977e+07	1.1638e+07	85.88	2.82	1.5	0.0010878	2.96	0.0833774	1.95241	265.175	356.5	5.9	Up
M266T111	M266T111	513245	545668	475565	542705	485509	512191	578758	595364	343012	428375	433440	350747	318675	341758	362031	391152	531126	527975	7.98	371149	356389	11.37	1.43	0.52	0.0001554	3.81	0.0532196	2.66452	266.099	110.8	1.8	Up
M266T379	M266T379	36610.3	57659.1	75487.2	50484.6	107331	75861.2	81089.9	100551	647353	216996	753886	511222	399117	55411	182977	168675	73134.2	75674.2	33.03	366955	308056	68.55	0.2	-2.33	0.004662	2.33	0.129379	2.17587	266.16	379	6.3	Down
M266T548	M266T548	451045	832233	1.34432e+06	645650	379750	642241	1.11409e+06	1.02464e+06	1.44307e+06	3.0487e+06	3.0688e+06	1.02353e+06	2.01866e+06	1.3299e+06	1.56284e+06	810919	804247	738942	41.86	1.7883e+06	1.50296e+06	48.2	0.45	-1.15	0.0104118	1.98	0.169968	1.96437	266.159	548.4	9.1	Down
M266T62	M266T62	1.57678e+06	1.97792e+06	2.18419e+06	2.63717e+06	2.83627e+06	1.78578e+06	2.31535e+06	2.02611e+06	2.05476e+06	1.93411e+06	1.74869e+06	1.71683e+06	1.81212e+06	1.78185e+06	1.96316e+06	1.55021e+06	2.16745e+06	2.10515e+06	19.42	1.82022e+06	1.79699e+06	8.78	1.19	0.25	0.0498834	1.3	0.330421	1.54009	265.906	62.2	1	Up
M266T72_3	M266T72_3	2.39539e+07	2.80859e+07	2.74144e+07	2.97971e+07	2.57163e+07	3.00687e+07	2.61959e+07	2.8102e+07	1.84623e+07	2.37463e+07	2.4153e+06	7.9762e+06	7.71635e+06	2.5447e+07	2.66613e+07	2.28606e+07	2.74168e+07	2.77502e+07	7.55	1.69107e+07	2.06614e+07	55.96	1.62	0.7	0.0018648	2.73	0.096514	1.56512	266.016	71.7	1.2	Up
M267T111	M267T111	1.56123e+06	2.36863e+06	1.64856e+06	1.86346e+06	2.6568e+06	2.8559e+06	2.49979e+06	2.30956e+06	1.82929e+06	1.48525e+06	1.88484e+06	1.64064e+06	2.24233e+06	1.47401e+06	1.36437e+06	1.97244e+06	2.22049e+06	2.33909e+06	21.47	1.73665e+06	1.73496e+06	17.16	1.28	0.35	0.0379176	1.42	0.297283	1.64243	267.137	111.3	1.9	Up
M267T475	M267T475	729451	598834	395378	558298	561736	540188	513690	543405	439363	402899	578116	138124	450284	349251	272469	385797	555122	550851	16.67	377038	394348	34.61	1.47	0.56	0.014763	1.83	0.200021	1.70465	267.134	475.2	7.9	Up
M268T346_2	M268T346_2	799575	1.00862e+06	1.08463e+06	1.15101e+06	913021	1.21755e+06	1.1312e+06	1.03885e+06	661461	950071	665491	609092	718630	711732	836492	753622	1.04306e+06	1.06174e+06	13.01	738324	715181	14.81	1.41	0.5	0.0010878	2.96	0.0833774	2.40334	268.13	345.8	5.8	Up
M268T405	M268T405	731862	1.73413e+06	1.49275e+06	1.43201e+06	1.86526e+06	493355	1.90175e+06	852730	400683	1.19204e+06	680750	322619	377138	1.24253e+06	1.28726e+06	393721	1.31298e+06	1.46238e+06	41.68	737092	540716	58.48	1.78	0.83	0.0206682	1.68	0.228643	1.56085	267.637	404.8	6.7	Up
M268T655	M268T655	778565	952345	1.26911e+06	859420	801283	627766	546913	831596	578774	716003	428699	713986	554956	775132	487179	476314	833374	816439	26.17	591380	566865	21.8	1.41	0.49	0.0104118	1.98	0.169968	1.77504	268.201	655.5	10.9	Up
M269T105	M269T105	2.14299e+06	2.52605e+06	1.99512e+06	2.44456e+06	4.04151e+06	2.31142e+06	2.07243e+06	2.05777e+06	1.76843e+06	1.87307e+06	2.34989e+06	2.65381e+06	1.62404e+06	1.5061e+06	1.62629e+06	1.91751e+06	2.44898e+06	2.2272e+06	27.42	1.91489e+06	1.82075e+06	20.64	1.28	0.35	0.0379176	1.42	0.297283	1.55132	269.153	104.8	1.7	Up
M269T111	M269T111	444277	395255	542584	928409	478823	392757	393690	391874	301366	43625.6	365249	373197	323108	458450	341934	46220.3	495958	419766	36.88	281644	332521	54.42	1.76	0.82	0.0029526	2.53	0.116769	1.5411	269.162	110.7	1.8	Up
M269T137	M269T137	37738.7	27937.6	22297	35302.5	41578.6	25300.6	15760.3	16299	2001.31	16646.3	9053.01	9315.15	8238.34	9844.44	23484.9	1673.71	27776.8	26619.1	34.92	10032.1	9184.08	71.86	2.77	1.47	0.0029526	2.53	0.116769	2.0204	268.997	136.8	2.3	Up
M269T148	M269T148	1.51326e+09	2.48354e+09	2.25456e+09	1.06207e+09	7.50615e+08	2.04445e+09	1.16287e+09	1.34313e+09	6.26301e+08	1.30476e+09	7.74453e+08	6.84537e+08	9.18767e+08	1.20042e+09	9.24269e+08	1.28467e+09	1.57681e+09	1.42819e+09	39.22	9.64773e+08	9.21518e+08	27.88	1.63	0.71	0.0379176	1.42	0.297283	1.64294	269.088	147.7	2.5	Up
M269T417	M269T417	151368	107868	126704	169613	165720	114551	250931	238348	14754.8	157735	31566	3728	56623.3	137183	159074	104511	165638	158544	32.47	83146.9	80567.2	77.48	1.99	0.99	0.0281274	1.55	0.261699	1.56953	268.546	417.4	7	Up
M269T756	M269T756	5.06849e+06	4.19402e+06	8.12447e+06	6.56031e+06	1.44655e+06	4.80752e+06	2.02168e+06	5.27264e+06	1.97552e+06	3.85218e+06	1.25116e+06	1.70189e+06	3.14194e+06	1.26227e+06	851852	2.63551e+06	4.68696e+06	4.938e+06	46.8	2.08404e+06	1.8387e+06	49.98	2.25	1.17	0.0104118	1.98	0.169968	1.80143	269.211	755.5	12.6	Up
M269T77	M269T77	293272	719142	416616	528140	1.2738e+06	487473	402846	414533	586246	847480	643919	754098	888610	826541	554151	747755	566977	452044	54.9	731100	750926	17	0.78	-0.37	0.0281274	1.55	0.261699	1.34053	269.019	76.8	1.3	Down
M270T384	M270T384	165023	308418	253723	34919.9	70151.3	136713	164055	183489	369312	273712	353307	394009	192160	169127	191600	262776	164562	164539	54.11	275750	268244	31.96	0.6	-0.74	0.014763	1.83	0.200021	1.61595	270.191	384.2	6.4	Down
M270T389	M270T389	454014	425311	273890	484414	519726	313070	523458	451033	164413	400867	181143	102046	445954	331917	434961	20592.1	430614	452523	21.29	260236	256530	62.94	1.65	0.73	0.0206682	1.68	0.228643	1.44122	270.155	389	6.5	Up
M270T729	M270T729	484127	479832	658782	425302	488537	581995	437904	434152	572995	175032	400348	214538	432826	475176	409273	451157	498829	481980	16.34	391418	421050	33.97	1.27	0.35	0.0498834	1.3	0.330421	1.31936	270.206	729.2	12.2	Up
M271T155	M271T155	2.09252e+06	1.96183e+06	2.44035e+06	3.79822e+06	2.48147e+06	2.02765e+06	2.13534e+06	2.49338e+06	1.60137e+06	1.37599e+06	1.70746e+06	2.46138e+06	1.63029e+06	2.3458e+06	1.97324e+06	1.0806e+06	2.42884e+06	2.28784e+06	24.41	1.77202e+06	1.66887e+06	26.41	1.37	0.45	0.0206682	1.68	0.228643	1.77004	271.001	155.3	2.6	Up
M271T203	M271T203	2.06682e+06	1.17965e+06	1.83318e+06	1.06657e+06	1.66512e+06	1.56649e+06	1.14886e+06	936778	2.55878e+06	2.396e+06	2.87512e+06	3.23873e+06	2.98011e+06	449106	2.37229e+06	2.8191e+06	1.43293e+06	1.37307e+06	28.4	2.46115e+06	2.68894e+06	35.17	0.58	-0.78	0.0104118	1.98	0.169968	1.34123	271.029	203	3.4	Down
M271T316	M271T316	1.43969e+06	1.27335e+06	1.3664e+06	1.63716e+06	312648	256226	1.45111e+06	1.3797e+06	1.71903e+06	2.75809e+06	2.30647e+06	1.28548e+06	1.05771e+06	1.4894e+06	1.7201e+06	2.13902e+06	1.13953e+06	1.37305e+06	47.21	1.80941e+06	1.71956e+06	31.08	0.63	-0.67	0.0379176	1.42	0.297283	1.44567	271.14	316.1	5.3	Down
M271T360	M271T360	392183	624214	483346	663379	719477	645848	791989	825104	293450	437166	506665	482177	234484	597985	510667	553638	643193	654613	22.79	452029	494421	27.94	1.42	0.51	0.0206682	1.68	0.228643	1.73012	271.139	359.8	6	Up
M271T372	M271T372	439183	426375	471987	607730	283166	273973	387605	356587	261072	148565	331991	280526	267419	394147	241210	135073	405826	406990	26.65	257501	264246	33.47	1.58	0.66	0.00699301	2.16	0.14968	1.86224	271.238	371.9	6.2	Up
M271T72_2	M271T72_2	3.51477e+06	4.0859e+06	3.68505e+06	3.89476e+06	4.61268e+06	4.02353e+06	4.07347e+06	4.24329e+06	2.49932e+06	2.81629e+06	2.21648e+06	3.19701e+06	2.62452e+06	4.607e+06	2.96752e+06	2.23869e+06	4.01668e+06	4.0485e+06	8.37	2.89585e+06	2.72041e+06	26.6	1.39	0.47	0.00699301	2.16	0.14968	2.16595	271.057	71.9	1.2	Up
M271T771	M271T771	1.40689e+06	729603	608757	1.28399e+06	1.39891e+06	764550	817219	1.02405e+06	433654	303201	559553	684877	459717	743797	1.01238e+06	291514	1.00425e+06	920635	31.95	561086	509635	43.56	1.79	0.84	0.00699301	2.16	0.14968	1.91493	271.188	770.7	12.8	Up
M271T82	M271T82	4.87719e+06	793954	7.44048e+06	1.18699e+06	1.50511e+06	873461	622172	615579	5.28886e+06	2.70391e+06	4.88565e+06	5.30138e+06	969821	5.15952e+06	2.52817e+06	8.39595e+06	2.23937e+06	1.03022e+06	113.05	4.40416e+06	5.02258e+06	51.87	0.51	-0.98	0.0379176	1.42	0.297283	1.63881	270.872	81.7	1.4	Down
M272T452	M272T452	4.63836e+06	2.17572e+06	4.83575e+06	3.26438e+06	3.01702e+06	4.5758e+06	3.47705e+06	6.77449e+06	1.0848e+06	4.0948e+06	2.01858e+06	1.74792e+06	1.17315e+06	2.11935e+06	5.05497e+06	1.08527e+06	4.09482e+06	4.02643e+06	34.75	2.29736e+06	1.88325e+06	64.67	1.78	0.83	0.0281274	1.55	0.261699	1.75589	272.185	452.4	7.5	Up
M272T71	M272T71	3.07903e+06	2.66002e+06	2.98352e+06	3.08142e+06	661070	3.24611e+06	3.02067e+06	2.88922e+06	866334	714059	522325	2.27695e+06	896398	2.99229e+06	2.46925e+06	1.09287e+06	2.70263e+06	3.00209e+06	31.16	1.47881e+06	994632	64.01	1.83	0.87	0.0206682	1.68	0.228643	1.56685	271.916	71.5	1.2	Up
M272T752	M272T752	2.02094e+07	1.71446e+07	3.14144e+07	5.00902e+07	1.70087e+07	3.85629e+07	1.86227e+07	3.67233e+07	2.02508e+07	2.49853e+07	8.00064e+06	6.52035e+06	8.11668e+06	2.68314e+07	1.57841e+07	1.40541e+07	2.8722e+07	2.58119e+07	43.05	1.55679e+07	1.49191e+07	50.61	1.84	0.88	0.0379176	1.42	0.297283	1.7525	272.258	751.5	12.5	Up
M272T789	M272T789	1.04952e+08	1.05878e+08	1.05547e+08	2.46778e+08	1.83799e+08	1.26481e+08	1.25642e+08	1.27556e+08	1.02338e+08	1.2131e+08	9.79091e+07	6.79429e+07	1.12403e+08	7.68637e+07	9.65319e+07	9.64593e+07	1.40829e+08	1.26062e+08	35.44	9.64697e+07	9.72205e+07	17.98	1.46	0.55	0.004662	2.33	0.129379	1.80893	272.295	788.7	13.1	Up
M273T103	M273T103	1.19247e+06	1.23482e+06	1.08405e+06	1.19655e+06	1.28887e+06	1.81665e+06	1.53348e+06	1.75095e+06	70771.7	1.53474e+06	493139	312851	513144	954093	557594	942317	1.38723e+06	1.26185e+06	19.97	672331	535369	67.87	2.06	1.04	0.004662	2.33	0.129379	1.82529	273.108	103	1.7	Up
M273T72	M273T72	3.94602e+06	5.92329e+06	5.70209e+06	4.7108e+06	5.30408e+06	8.31225e+06	5.51238e+06	5.31946e+06	6.86777e+06	6.35383e+06	6.57635e+06	1.0156e+07	9.99806e+06	7.36853e+06	7.2347e+06	7.71771e+06	5.5913e+06	5.41592e+06	22.59	7.78412e+06	7.30161e+06	19.02	0.72	-0.48	0.004662	2.33	0.129379	1.95893	272.942	71.8	1.2	Down
M273T747	M273T747	1.63603e+06	477383	1.168e+06	1.42675e+06	506812	307491	382107	1.14592e+06	340039	195159	402820	817269	358867	594140	353765	126452	881311	826364	59.13	398564	356316	54.97	2.21	1.14	0.0498834	1.3	0.330421	1.59336	273.184	747.3	12.5	Up
M273T85	M273T85	2.46402e+07	3.96676e+06	8.09827e+06	6.25124e+06	3.70886e+06	8.45772e+06	4.87691e+06	5.26939e+06	1.0508e+07	9.4752e+06	1.18778e+07	1.36905e+07	1.25395e+07	1.17641e+07	1.66811e+07	1.2023e+07	8.15867e+06	5.76032e+06	84.39	1.23199e+07	1.19504e+07	17.6	0.66	-0.59	0.0104118	1.98	0.169968	1.82509	273.017	84.6	1.4	Down
M273T89_2	M273T89_2	5.2492e+06	4.99841e+06	5.11935e+06	4.90492e+06	4.27357e+06	4.64965e+06	4.47029e+06	4.62684e+06	2.07619e+06	4.56761e+06	1.9072e+06	1.98822e+06	1.75162e+06	4.22827e+06	4.56142e+06	5.18255e+06	4.78653e+06	4.77728e+06	7.02	3.28288e+06	3.15223e+06	44.82	1.46	0.54	0.0281274	1.55	0.261699	1.73852	273.119	88.7	1.5	Up
M274T105_2	M274T105_2	1.17891e+07	1.91857e+07	1.63884e+07	1.72483e+07	1.70062e+07	2.47432e+07	1.58156e+07	9.00131e+06	2.92234e+07	2.06411e+07	2.93141e+07	3.57113e+07	2.82319e+07	2.2348e+07	1.76038e+07	1.77866e+07	1.63972e+07	1.66973e+07	28.68	2.51075e+07	2.52899e+07	25.83	0.65	-0.61	0.004662	2.33	0.129379	1.82553	274.092	104.5	1.7	Down
M274T32	M274T32	2.02803e+06	2.13528e+06	1.37351e+06	1.53401e+06	2.3583e+06	1.96753e+06	2.35279e+06	2.38316e+06	118855	1.36667e+06	153545	129256	128525	1.03437e+06	888132	1.03468e+06	2.01658e+06	2.08165e+06	19	606754	520839	86.38	3.32	1.73	0.0001554	3.81	0.0532196	2.17133	273.915	32.4	0.5	Up
M274T338	M274T338	1.46715e+06	3.90092e+06	974798	1.57068e+06	6.46998e+06	3.10516e+06	4.45991e+06	3.68088e+06	537508	1.38199e+06	1.36585e+06	777950	2.47439e+06	755058	852945	1.47198e+06	3.20368e+06	3.39302e+06	57.34	1.20221e+06	1.1094e+06	51.6	2.66	1.41	0.00699301	2.16	0.14968	1.94173	274.018	338.4	5.6	Up
M274T362	M274T362	2.57289e+06	4.66976e+06	3.0306e+06	5.25978e+06	5.81103e+06	4.6496e+06	7.23685e+06	6.32832e+06	1.09778e+06	2.62161e+06	4.46779e+06	3.11114e+06	648773	4.44948e+06	4.51909e+06	4.34932e+06	4.94485e+06	4.96477e+06	31.95	3.15812e+06	3.73023e+06	50.05	1.57	0.65	0.0281274	1.55	0.261699	1.45098	274.164	361.6	6	Up
M274T418	M274T418	436483	358072	372398	594061	410142	410236	757144	560867	605928	860824	580287	591256	469489	534166	714096	718164	487425	423359	28.39	634276	598592	19.54	0.77	-0.38	0.0498834	1.3	0.330421	1.57061	274.163	418.5	7	Down
M274T60	M274T60	1.44786e+06	1.7134e+06	1.41565e+06	1.52148e+06	1.97848e+06	1.75387e+06	1.60964e+06	1.83126e+06	1.36892e+06	1.71677e+06	1.33893e+06	1.35021e+06	1.48608e+06	1.36761e+06	1.5698e+06	1.42771e+06	1.65895e+06	1.66152e+06	11.81	1.45325e+06	1.39831e+06	9.12	1.14	0.19	0.0281274	1.55	0.261699	1.66487	273.913	60.4	1	Up
M274T692	M274T692	1.89878e+06	1.34957e+06	1.43025e+06	3.04067e+06	1.21597e+06	1.91102e+06	1.28928e+06	1.16489e+06	1.52012e+06	2.53125e+06	3.5189e+06	1.70129e+06	1.78578e+06	1.54281e+06	3.10804e+06	3.13867e+06	1.66255e+06	1.38991e+06	37.73	2.35586e+06	2.15851e+06	34.69	0.71	-0.5	0.0498834	1.3	0.330421	1.40148	274.201	692	11.5	Down
M275T699_1	M275T699_1	1.79915e+06	2.77048e+06	2.33773e+06	1.48964e+06	2.35911e+06	4.51675e+06	3.17712e+06	2.59912e+06	4.26434e+06	4.91538e+06	3.03802e+06	3.21672e+06	4.5352e+06	3.34123e+06	3.06264e+06	4.97239e+06	2.63114e+06	2479118	35.27	3.91824e+06	3.80278e+06	21.44	0.67	-0.57	0.00699301	2.16	0.14968	1.85198	275.187	699.4	11.7	Down
M276T103	M276T103	1.28434e+07	8.98127e+06	1.12184e+07	1.0598e+07	1.05893e+07	9.77274e+06	1.13353e+07	9.90747e+06	1.14528e+07	1.03383e+07	1.2691e+07	1.47708e+07	1.20729e+07	1.33584e+07	1.30771e+07	1.11262e+07	1.06557e+07	1.05937e+07	11.06	1.23609e+07	1.2382e+07	11.42	0.86	-0.21	0.0281274	1.55	0.261699	1.76491	276.119	102.6	1.7	Down
M276T114	M276T114	2.66946e+06	1.54294e+06	2.59397e+06	1.77445e+06	3.80346e+06	1.68841e+06	2.53565e+06	2.2801e+06	6.04256e+06	4.15323e+06	8.49629e+06	3.84188e+06	4.95151e+06	1.90217e+06	4.34398e+06	4.50973e+06	2.36106e+06	2.40788e+06	30.93	4.78017e+06	4.42685e+06	39.73	0.49	-1.02	0.0029526	2.53	0.116769	2.09137	276.051	114	1.9	Down
M276T320	M276T320	258743	162919	229242	264841	173970	277044	211798	217006	121234	289688	245877	349694	326160	376873	332685	321559	224445	223124	18.56	295471	323860	27.26	0.76	-0.4	0.0281274	1.55	0.261699	1.21406	276.054	320.2	5.3	Down
M276T78	M276T78	1.20486e+06	1.43746e+06	1.30503e+06	1.59651e+06	910103	1.62782e+06	1.40496e+06	1.44333e+06	1.13638e+06	779034	967790	910319	1.42424e+06	1.31055e+06	1.02608e+06	1.15338e+06	1366258	1.42121e+06	16.87	1.08847e+06	1.08123e+06	19.47	1.26	0.33	0.0379176	1.42	0.297283	1.63534	276.041	78.2	1.3	Up
M277T392	M277T392	1.04074e+07	8.14224e+06	9.16363e+06	9.43261e+06	1.00055e+07	8.65585e+06	9.78897e+06	1.02935e+07	7.05638e+06	3.97567e+06	8.93264e+06	8.6817e+06	7.80658e+06	9.56021e+06	8.19781e+06	6.63235e+06	9.48621e+06	9.61079e+06	8.42	7.60542e+06	8.00219e+06	23.07	1.25	0.32	0.014763	1.83	0.200021	1.59406	277.183	391.5	6.5	Up
M277T417	M277T417	124108	1.90453e+06	313961	402203	1.50599e+06	793564	1.44132e+06	1.33652e+06	74702.5	387455	892702	109153	84330.2	289957	130913	627865	977775	1.06504e+06	67.13	324635	210435	91.97	3.01	1.59	0.0281274	1.55	0.261699	1.69311	276.532	417.4	7	Up
M277T707	M277T707	1.0365e+06	2.02327e+06	1.60507e+06	853828	2.1636e+06	1.62093e+06	1.60545e+06	1.3664e+06	2.68625e+06	1.96398e+06	1.41131e+06	1.96883e+06	2.52421e+06	1.96489e+06	1.83706e+06	2.7997e+06	1.53438e+06	1.60526e+06	29.06	2.14453e+06	1.96686e+06	22.26	0.72	-0.48	0.0498834	1.3	0.330421	1.67922	277.128	707.2	11.8	Down
M277T720	M277T720	459340	909065	601021	864393	573274	768146	541147	429423	289819	440821	181800	376320	207030	382603	527640	562912	643226	587147	28.29	371118	379462	37.51	1.73	0.79	0.004662	2.33	0.129379	1.98773	277.189	719.9	12	Up
M278T112_2	M278T112_2	2.54509e+06	2.69368e+06	2.67387e+06	3.51912e+06	1.69641e+06	3.94834e+06	3.95764e+06	4.01192e+06	1.63026e+06	932647	1.43789e+06	2.42833e+06	1.68125e+06	1.76728e+06	1.75701e+06	1.4437e+06	3.13076e+06	3.1064e+06	27.21	1.6348e+06	1.65576e+06	25.67	1.92	0.94	0.0010878	2.96	0.0833774	2.30954	278.091	112.5	1.9	Up
M278T392	M278T392	502077	132998	221017	162360	575715	124763	580863	168880	1.69827e+06	838417	3.45014e+06	1.49216e+06	835385	114786	187816	903046	308584	194949	66.65	1.19e+06	870731	89.55	0.26	-1.95	0.0379176	1.42	0.297283	1.60527	278.185	391.5	6.5	Down
M278T457	M278T457	8.55909e+06	5.20329e+06	4.00119e+06	4.30974e+06	4.48062e+06	3.78773e+06	6.37102e+06	4.53151e+06	9.45114e+06	1.3588e+07	4.21747e+06	6.29797e+06	8.40135e+06	1.08437e+07	5.21735e+06	1.39369e+07	5.15552e+06	4.50606e+06	30.95	8.99423e+06	8.92624e+06	40.71	0.57	-0.8	0.0281274	1.55	0.261699	1.82605	278.185	456.6	7.6	Down
M278T679	M278T679	431050	570130	432990	206298	409626	752533	651389	873238	1.02959e+06	830697	641605	594861	1.10995e+06	822361	623626	1.02057e+06	540907	501560	39.6	834157	826529	24.31	0.65	-0.62	0.0281274	1.55	0.261699	1.74135	278.232	679.1	11.3	Down
M278T72	M278T72	243652	245904	231779	361067	956392	64618	246364	250463	1.64508e+06	512925	1.2785e+06	962015	948972	703489	945589	1.89182e+06	325030	246134	82.31	1.11105e+06	955494	41.98	0.29	-1.77	0.0018648	2.73	0.096514	2.28937	277.962	71.7	1.2	Down
M278T723	M278T723	913068	1.85227e+06	2.17446e+06	1.68172e+06	935492	948722	1.01637e+06	1.71376e+06	701036	731190	365510	915237	1.21589e+06	761318	50394.7	1.06501e+06	1.40448e+06	1.34904e+06	35.96	725698	746254	51.53	1.94	0.95	0.014763	1.83	0.200021	1.56766	278.195	722.5	12	Up
M278T815	M278T815	3.59857e+06	4.51996e+06	3.84759e+06	1.13874e+07	5.3816e+06	5.01074e+06	4.96052e+06	1.26095e+07	6.97518e+06	1.47793e+07	2.1378e+07	9.489e+06	5.52953e+06	6.8891e+06	1.23851e+07	2.05255e+07	6.41449e+06	4.98563e+06	54.76	1.22438e+07	1.09371e+07	50.5	0.52	-0.93	0.014763	1.83	0.200021	1.60854	278.247	815	13.6	Down
M279T371	M279T371	200871	440398	151932	224409	853751	532816	394875	424966	265541	129965	409692	93108.4	172193	114671	92391.2	89249.8	403002	409921	56.1	170852	122318	66.26	2.36	1.24	0.0104118	1.98	0.169968	1.91989	279.072	371	6.2	Up
M279T420	M279T420	669390	1.35689e+07	5.03143e+06	5.6287e+06	5.369e+06	4.73386e+06	1.05505e+07	6.25227e+06	3.64138e+06	3.7297e+06	2.0818e+06	1.95988e+06	5.44086e+06	1.06754e+06	2.96605e+06	5.08516e+06	6.47551e+06	5.49885e+06	60.59	3.24655e+06	3.30372e+06	47.18	1.99	1	0.0498834	1.3	0.330421	1.19593	279.137	419.9	7	Up
M279T429	M279T429	511651	70296.9	325412	59494.3	357407	41442.2	255788	62563.8	667346	436967	241416	781979	406618	326930	322156	437492	210507	163042	84.3	452613	421792	40.45	0.47	-1.1	0.0379176	1.42	0.297283	1.896	279.007	429	7.2	Down
M279T457_2	M279T457_2	402490	399371	556288	448412	530940	359478	423864	391778	325956	302635	375971	397489	322488	510929	348180	272489	439078	413177	15.87	357017	337068	20.64	1.23	0.3	0.014763	1.83	0.200021	1.62972	279.188	456.7	7.6	Up
M279T81	M279T81	661005	1.18731e+06	1.15608e+06	1.59e+06	393445	1.24958e+06	738692	810100	2.59863e+06	536472	1.7223e+06	1.78865e+06	2.09584e+06	1.76357e+06	672431	1.91762e+06	973276	983089	39.82	1.63694e+06	1.77611e+06	42.59	0.59	-0.75	0.0498834	1.3	0.330421	1.27702	278.868	80.9	1.3	Down
M279T82_2	M279T82_2	6.93374e+06	5.83146e+06	6.99639e+06	7.04097e+06	6.50389e+06	6.5834e+06	6.74708e+06	7.6452e+06	2.01e+06	3.14834e+06	2.56943e+06	908198	3.45338e+06	6.40793e+06	4.03609e+06	4.01484e+06	6.78527e+06	6.84041e+06	7.68	3.31852e+06	3.30086e+06	49.22	2.04	1.03	0.0003108	3.51	0.0568482	2.15183	278.923	81.7	1.4	Up
M279T90	M279T90	1.21814e+07	1.65794e+07	1.4229e+07	1.48288e+07	1.58898e+07	1.37843e+07	1.69355e+07	1.65163e+07	6.60522e+06	1.2517e+07	1.39234e+07	1.23075e+07	1.09722e+07	1.24781e+07	1.25289e+07	1.6391e+07	1.51181e+07	1.53593e+07	10.97	1.22154e+07	1.24975e+07	22.66	1.24	0.31	0.0281274	1.55	0.261699	1.59316	279.19	90.1	1.5	Up
M280T101	M280T101	336919	203743	280333	218623	511460	185298	306259	262143	820271	565869	1.11157e+06	530121	611886	193317	648769	557518	288098	271238	36.13	629915	588877	41.52	0.46	-1.13	0.00699301	2.16	0.14968	2.0404	280.15	100.7	1.7	Down
M280T73	M280T73	2.71067e+06	2.77188e+06	5.89986e+06	4.22805e+06	5.94581e+06	3.24549e+06	6.32309e+06	7.23898e+06	6.1007e+06	7.19576e+06	1.55951e+07	1.58683e+07	1.4599e+07	1.25061e+07	6.95083e+06	1.12334e+07	4.79548e+06	5.06396e+06	36.98	1.12561e+07	1.18697e+07	35.92	0.43	-1.23	0.0018648	2.73	0.096514	2.20177	279.924	72.5	1.2	Down
M280T90_2	M280T90_2	2.90304e+06	3.24642e+06	2.61021e+06	2.38942e+06	1.82619e+06	2.82112e+06	2.52682e+06	2.41524e+06	351758	2.78855e+06	378766	309600	359122	2.06681e+06	2.42976e+06	2.20736e+06	2.59231e+06	2.56851e+06	16.24	1.36147e+06	1.22279e+06	80.88	1.9	0.93	0.0206682	1.68	0.228643	1.75609	280.194	90.1	1.5	Up
M280T96	M280T96	5.41772e+07	1.21325e+07	2.38658e+07	1.82179e+07	1.46157e+07	2.28097e+07	1.69134e+07	1.60286e+07	2.79927e+07	2.73381e+07	2.58031e+07	4.25405e+07	3.09326e+07	4.29021e+07	4.46762e+07	3.44966e+07	2.23451e+07	1.75656e+07	60.19	3.45853e+07	3.27146e+07	22.42	0.65	-0.63	0.0104118	1.98	0.169968	1.90996	280.102	95.7	1.6	Down
M281T104	M281T104	849874	169409	1.49317e+06	1.14464e+06	824804	112900	467096	294504	2.05532e+06	1.89772e+06	3.49457e+06	1.65013e+06	1.33771e+06	807147	5.12628e+06	2.14026e+06	669550	645950	73.65	2.31364e+06	1.97652e+06	59.44	0.29	-1.79	0.0029526	2.53	0.116769	2.09908	280.953	103.8	1.7	Down
M281T121	M281T121	2.29942e+06	5.04829e+06	4.80306e+06	3.05478e+06	2.96958e+06	4.59935e+06	3.39974e+06	3.92071e+06	7.13527e+06	9.03163e+06	7.14401e+06	8.26599e+06	8.64877e+06	6.2716e+06	6.42759e+06	7.67418e+06	3.76187e+06	3.66023e+06	26.32	7.57488e+06	7.40909e+06	13.35	0.5	-1.01	0.0001554	3.81	0.0532196	2.54932	281.141	121.4	2	Down
M281T199	M281T199	3.50778e+06	4.41557e+06	4.09482e+06	4.4337e+06	4.16884e+06	4.97488e+06	4.45207e+06	5.04004e+06	2.93041e+06	4.10616e+06	2.67365e+06	2.69089e+06	3.15772e+06	3.11813e+06	3.38829e+06	3.36711e+06	4.38596e+06	4.42464e+06	11.19	3.17905e+06	3.13793e+06	14.55	1.38	0.46	0.000621601	3.21	0.069967	2.41316	281.116	199	3.3	Up
M281T304	M281T304	1.1723e+06	1.42436e+06	997115	1.09476e+06	848864	1.14953e+06	1.14931e+06	983051	138910	874698	134324	70466.2	126419	790381	780106	668960	1.10241e+06	1.12203e+06	15.43	448033	403935	79.96	2.46	1.3	0.0003108	3.51	0.0568482	1.99185	281.117	303.9	5.1	Up
M281T350	M281T350	2.29661e+06	1.39956e+06	2.14398e+06	3.74657e+06	2.24882e+06	1.32429e+06	1.44898e+06	1.78682e+06	656765	563671	1.02135e+06	1.4614e+06	896801	1.53039e+06	1.65667e+06	431902	2.04946e+06	1.9654e+06	38.54	1.02737e+06	959076	45.97	1.99	1	0.014763	1.83	0.200021	2.0044	281.107	350.1	5.8	Up
M281T362_2	M281T362_2	166642	258789	209875	310418	188464	695183	301628	330591	1.83111e+06	144607	1.01857e+06	600396	746825	356643	316815	777705	307699	280209	54.49	724083	673610	73.22	0.42	-1.23	0.0379176	1.42	0.297283	1.45439	281.149	361.6	6	Down
M281T92	M281T92	2.80927e+06	2.55785e+06	2.77416e+06	3.03836e+06	2.57178e+06	2.90181e+06	2.94864e+06	3.04827e+06	1.49609e+06	2.45453e+06	2.14098e+06	1.47768e+06	1.3563e+06	2.01011e+06	1.75324e+06	2.98904e+06	2.83127e+06	2.85554e+06	6.74	1.95975e+06	1.88167e+06	28.57	1.44	0.53	0.004662	2.33	0.129379	2.16991	281.104	91.7	1.5	Up
M282T821	M282T821	2.10935e+07	3.07805e+07	2.75762e+07	4.03857e+07	2.20354e+07	1.21143e+07	9.16181e+06	2.58032e+07	7.30381e+06	1.4882e+07	1.1143e+07	7.50511e+06	3.06899e+06	9.03313e+06	2.22425e+07	2.48501e+07	2.36188e+07	2.39193e+07	42.43	1.25036e+07	1.00881e+07	61.05	1.89	0.92	0.0281274	1.55	0.261699	1.63134	282.276	820.6	13.7	Up
M283T121	M283T121	2.92215e+06	3.31777e+06	2.58015e+06	483839	952355	3.31185e+06	2.23317e+06	2.45223e+06	4.34231e+06	4.67882e+06	5.74392e+06	4.06183e+06	5.31997e+06	4.99098e+06	6.04994e+06	4.94501e+06	2.28169e+06	2516187	45.86	5.0166e+06	4.968e+06	13.42	0.45	-1.14	0.0001554	3.81	0.0532196	2.16212	283.122	121.5	2	Down
M283T321_1	M283T321_1	4.72615e+07	2.25043e+07	7.26799e+07	3.31842e+07	2.12103e+07	2.51274e+07	3.58352e+07	3.1818e+07	699534	1.31731e+07	1.78099e+06	2.83696e+06	989064	3.30703e+07	3.20442e+06	1.55853e+07	3.62026e+07	3.25011e+07	46.88	8.91745e+06	3.02069e+06	126.93	4.06	2.02	0.0018648	2.73	0.096514	2.17101	282.575	320.6	5.3	Up
M284T113	M284T113	54559.5	48247.7	48554.3	48414.3	62762.4	30699.1	53734.6	59609.9	80966.7	60860.4	77169.2	107566	104409	52890.7	97311.3	77630.7	50822.7	51144.5	19.17	82350.5	79298.7	23.97	0.62	-0.7	0.0029526	2.53	0.116769	2.18278	284.16	113.1	1.9	Down
M284T313	M284T313	2.23773e+06	2.97416e+06	2.64842e+06	2.26784e+06	1.65656e+06	2.94224e+06	2.54237e+06	2.23905e+06	61853.3	1.82537e+06	68123.5	52652.4	70175	2.2456e+06	1.71214e+06	1.78085e+06	2.43855e+06	2.40511e+06	17.78	977095	891157	101.29	2.5	1.32	0.004662	2.33	0.129379	1.83556	284.099	313	5.2	Up
M284T321_1	M284T321_1	2.08437e+06	3.15918e+06	2.32481e+06	2.25536e+06	2.15118e+06	2.71412e+06	2.377e+06	2.69393e+06	516168	1.8557e+06	413434	551409	464897	1.15079e+06	1.01428e+06	1.23896e+06	2.46999e+06	2.35091e+06	14.6	900704	782845	56.29	2.74	1.46	0.0001554	3.81	0.0532196	2.45961	283.573	320.6	5.3	Up
M284T348_1	M284T348_1	3.40025e+07	3.01762e+07	4.17804e+07	3.03422e+07	5.91561e+06	3.25449e+07	2.37361e+07	2.25378e+07	1.45391e+07	2.60235e+06	1.00654e+07	7.74629e+06	1.59545e+07	8.34756e+06	2.74575e+06	4.21252e+06	2.76295e+07	3.02592e+07	38.48	8.27669e+06	8.04692e+06	61.43	3.34	1.74	0.0029526	2.53	0.116769	2.13445	283.6	347.8	5.8	Up
M284T353	M284T353	148295	428170	181656	237325	201787	469231	287991	309375	744949	277532	542088	476205	547660	427102	352566	555080	282979	262658	40.86	490398	509147	29.19	0.58	-0.79	0.0104118	1.98	0.169968	1.86968	284.187	353	5.9	Down
M284T384	M284T384	1.28869e+08	6.39898e+08	5.63934e+08	5.63259e+08	3.26648e+08	8.00189e+08	4.33881e+08	1.10009e+09	1.16139e+08	1.09455e+08	2.2757e+08	1.18973e+08	1.31463e+08	4.02635e+08	1.31666e+08	4.49082e+08	5.69596e+08	5.63596e+08	51.88	2.10873e+08	1.31564e+08	65.63	2.7	1.43	0.0104118	1.98	0.169968	2.01842	284.206	384.3	6.4	Up
M284T443	M284T443	492610	941118	988368	583874	507758	559386	874830	1.73836e+06	1.96335e+06	2.22757e+06	2.34419e+06	552396	1.48322e+06	1.16535e+06	1.12381e+06	3.43915e+06	835789	729352	49.86	1.78738e+06	1.72328e+06	50.52	0.47	-1.1	0.014763	1.83	0.200021	1.77871	284.206	442.5	7.4	Down
M284T618	M284T618	638708	999458	966679	1.06194e+06	576931	619699	882136	567066	817578	482516	475538	466947	492085	597335	543835	665668	789077	760422	26.43	567688	517960	21.58	1.39	0.48	0.0206682	1.68	0.228643	1.76117	284.089	618.3	10.3	Up
M284T83	M284T83	3.69902e+06	2.39555e+06	3.47623e+06	2.43555e+06	3.5207e+06	3.79534e+06	2.99031e+06	2.68023e+06	4.77565e+06	3.88405e+06	6.80511e+06	3.64249e+06	4.70274e+06	3.14583e+06	3.46056e+06	3.76121e+06	3.12412e+06	3.23327e+06	18.28	4.2722e+06	3.82263e+06	27.4	0.73	-0.45	0.0281274	1.55	0.261699	1.78986	284.137	82.5	1.4	Down
M285T106	M285T106	1.41894e+06	1.88222e+06	1.60337e+06	1.67402e+06	1.14238e+06	1.52373e+06	1.73384e+06	1.59485e+06	1.32021e+06	968019	1.36523e+06	1.32068e+06	1.67134e+06	1.23357e+06	1.38321e+06	1.33083e+06	1.57167e+06	1.59911e+06	14.12	1.32414e+06	1.32575e+06	14.58	1.19	0.25	0.0281274	1.55	0.261699	1.56669	285.119	105.9	1.8	Up
M285T300	M285T300	8.40825e+06	3.28882e+07	2.67011e+07	3.50819e+07	3.52697e+07	1.14256e+07	4.04842e+07	3.70127e+07	1.92675e+07	2.28204e+07	7.25495e+06	4.19413e+06	4.55234e+06	6.82567e+06	2.52726e+07	2.67723e+07	2.8409e+07	3.3985e+07	42.55	1.462e+07	1.32612e+07	67.17	1.94	0.96	0.014763	1.83	0.200021	1.56495	285.082	300.1	5	Up
M286T105	M286T105	6.09169e+06	3.82685e+06	6.56092e+06	4.7114e+06	8.36339e+06	2.88571e+06	4.74619e+06	4.46696e+06	1.10596e+07	7.92597e+06	1.9317e+07	9.38884e+06	8.12317e+06	3.98636e+06	8.58252e+06	9.01549e+06	5.20664e+06	4.72879e+06	33.17	9.67486e+06	8.799e+06	45.29	0.54	-0.89	0.0104118	1.98	0.169968	1.88203	286.058	105	1.8	Down
M286T322	M286T322	2.75678e+06	2.63392e+06	2.68097e+06	2.89072e+06	2.77082e+06	2.76844e+06	2.63266e+06	2.89792e+06	3.75713e+06	2.80169e+06	3.90728e+06	2.83504e+06	3.30251e+06	3.14096e+06	3.49249e+06	2.39138e+06	2.75403e+06	2.76261e+06	3.74	3.20356e+06	3.22174e+06	16.07	0.86	-0.22	0.0379176	1.42	0.297283	1.55763	286.086	322.3	5.4	Down
M286T642_1	M286T642_1	1.1796e+06	1.66939e+06	752915	963485	1.34114e+06	1.23701e+06	584504	627362	659246	2.16589e+06	3.17863e+06	1.54379e+06	809528	1.72257e+06	1.98039e+06	2.52604e+06	1.04443e+06	1.07154e+06	36.39	1.82326e+06	1.85148e+06	46.09	0.57	-0.8	0.0379176	1.42	0.297283	1.47356	285.554	642.2	10.7	Down
M286T820	M286T820	9.63917e+06	1.59194e+07	2.1665e+07	9.18449e+06	1.14144e+07	7.24464e+06	3.54846e+06	1.3771e+07	4.78917e+06	4.89911e+06	3.73714e+06	3.37394e+06	4.00646e+06	8.16533e+06	4.81473e+06	7.0132e+06	1.15483e+07	1.05268e+07	48.34	5.09989e+06	4.80195e+06	32.57	2.26	1.18	0.0104118	1.98	0.169968	1.95073	286.31	820	13.7	Up
M286T83	M286T83	61401.9	1.90414e+06	1.57148e+06	1.53834e+06	2.48733e+06	127622	2.1108e+06	1.36662e+06	2.77851e+06	2.10013e+06	2.90938e+06	1.69259e+06	1.62072e+06	2.08148e+06	1.5804e+06	3.16814e+06	1.39597e+06	1.55491e+06	62.93	2241420	2.0908e+06	28.03	0.62	-0.68	0.0498834	1.3	0.330421	1.21167	286.135	82.6	1.4	Down
M287T377	M287T377	320938	671561	406944	317571	483717	397480	475857	453375	367311	174086	243685	282500	401675	73395.3	243504	327566	440930	430160	25.58	264215	263093	40.27	1.67	0.74	0.00699301	2.16	0.14968	1.77478	287.124	376.6	6.3	Up
M287T572	M287T572	467491	353139	555067	377378	461724	400844	407955	329212	436246	498302	665597	652444	695182	422499	515735	489802	419101	404400	17.41	546976	507019	19.73	0.77	-0.38	0.014763	1.83	0.200021	1.84377	287.196	572.5	9.5	Down
M287T72	M287T72	4.93646e+06	5.83252e+06	4.97583e+06	4.79226e+06	4.71222e+06	5.94067e+06	5.01478e+06	5.06142e+06	5.63833e+06	6.56853e+06	5.53025e+06	5.1992e+06	5.92948e+06	5.12102e+06	5.38935e+06	6.52773e+06	5.15827e+06	4.9953e+06	9.01	5.73799e+06	5.58429e+06	9.76	0.9	-0.15	0.0281274	1.55	0.261699	1.55208	286.958	71.7	1.2	Down
M287T804	M287T804	8.6887e+06	1.76732e+07	9.45385e+06	1.29871e+07	1.36349e+07	3.05566e+07	1.68677e+07	1.24916e+07	1.56369e+07	2.62884e+07	2.26994e+07	1.29294e+07	1.81076e+07	2.69786e+07	3.17515e+07	3.811e+07	1.52942e+07	1.3311e+07	45.22	2.40627e+07	2.44939e+07	35.2	0.64	-0.65	0.0379176	1.42	0.297283	1.5854	286.624	804.2	13.4	Down
M288T485_2	M288T485_2	597415	386546	692045	869377	915574	845033	1.15188e+06	944798	243678	528946	779419	163501	323902	211988	429896	515884	800333	857205	29.44	399652	376899	51.49	2	1	0.004662	2.33	0.129379	2.0222	288.445	484.6	8.1	Up
M288T505	M288T505	918647	443353	411177	524919	434059	1.50801e+06	620822	853840	1.55909e+06	1.07965e+06	1.44684e+06	1.02457e+06	1.19316e+06	652405	490948	985043	714354	572871	52.37	1.05396e+06	1.05211e+06	34.27	0.68	-0.56	0.0498834	1.3	0.330421	1.4065	288.126	505.2	8.4	Down
M289T442	M289T442	84411	136705	100649	54442.9	120668	138244	193776	197372	152472	352361	165883	160058	203329	221003	154178	206502	128284	128687	38.9	201973	184606	32.84	0.64	-0.65	0.0104118	1.98	0.169968	1.7319	289.162	442.3	7.4	Down
M289T99	M289T99	480587	215490	639086	273074	225122	222792	251066	246419	764022	322729	871313	602727	664882	319313	498387	654243	319204	248743	48.73	587202	628485	33.59	0.54	-0.88	0.004662	2.33	0.129379	1.98858	289.493	99.2	1.7	Down
M290T486_2	M290T486_2	234055	329277	387515	601050	621594	332423	365936	486378	232562	225113	201696	357440	304061	446822	377649	131738	419778	376726	32.75	284635	268311	36.88	1.47	0.56	0.0498834	1.3	0.330421	1.56751	289.941	485.9	8.1	Up
M290T690	M290T690	2.79568e+06	2.48069e+06	3.90983e+06	677429	941720	5.9974e+06	3.15941e+06	4.88907e+06	7.30417e+06	7.67562e+06	5.4903e+06	4.85793e+06	8.11779e+06	2.41644e+06	4.34287e+06	8.56058e+06	3.1064e+06	2.97754e+06	58.68	6.09571e+06	6.39723e+06	35.42	0.51	-0.97	0.0281274	1.55	0.261699	1.73697	290.251	689.8	11.5	Down
M290T701	M290T701	343389	434296	448801	455088	316161	596308	485188	396026	390312	390260	298064	349639	175552	325157	365858	361537	434407	441548	20.06	332047	355588	21.23	1.31	0.39	0.0281274	1.55	0.261699	1.63221	290.209	700.9	11.7	Up
M291T150	M291T150	5.78497e+06	3.62127e+06	5.76811e+06	3.86812e+06	3.9121e+06	5.18864e+06	3.88581e+06	4.32734e+06	9.1871e+06	6.11283e+06	6.00874e+06	9.80104e+06	6.34281e+06	5.15119e+06	5.76e+06	5.609e+06	4.54454e+06	4.11972e+06	19.75	6.74659e+06	6.06079e+06	25.8	0.67	-0.57	0.00699301	2.16	0.14968	2.08956	291.082	150.2	2.5	Down
M291T309	M291T309	237474	833045	1.0967e+06	126512	849202	982804	1.12985e+06	1.18077e+06	1.45785e+06	1.87966e+06	1.20694e+06	2.0882e+06	1.25427e+06	706378	987120	1.21026e+06	804544	916003	50.35	1.34883e+06	1.23226e+06	33.53	0.6	-0.75	0.014763	1.83	0.200021	1.45938	290.998	308.8	5.1	Down
M291T745	M291T745	1.3401e+06	438726	2.16728e+06	1.29863e+06	2.34973e+06	1.53336e+06	601964	602406	424108	470929	592834	286415	658347	955669	781703	199616	1.29153e+06	1.31937e+06	55.72	546203	531882	46.22	2.36	1.24	0.0281274	1.55	0.261699	1.73625	291.272	745.1	12.4	Up
M291T825	M291T825	5.92037e+06	2.29225e+07	1.00613e+07	3.82607e+06	7.26266e+06	3.5091e+07	3.30907e+07	2.85465e+07	3.36587e+07	4.50199e+07	3.11346e+07	3.25605e+07	4.03962e+07	2.94756e+07	3.58992e+07	3.52874e+07	1.83401e+07	1.64919e+07	70.78	3.5429e+07	3.44731e+07	14.4	0.52	-0.95	0.00699301	2.16	0.14968	1.83765	290.609	825.2	13.8	Down
M292T101	M292T101	2.30794e+06	3.27956e+06	2.1769e+06	3.52651e+06	2.89577e+06	2.94065e+06	4.13669e+06	4.12624e+06	1.29863e+06	2.92505e+06	1.20941e+06	128074	1.45192e+06	1.92809e+06	2.43131e+06	2.12548e+06	3.17378e+06	3.1101e+06	23.35	1687246	1690004	51.09	1.88	0.91	0.0029526	2.53	0.116769	1.59418	291.907	100.5	1.7	Up
M292T104	M292T104	2.44261e+06	382585	157819	482737	2.37222e+06	275279	423950	417152	4.10572e+06	3.32949e+06	5.33061e+06	685476	2.62268e+06	437651	1.1586e+06	3.31483e+06	869293	420551	109.84	2.62313e+06	2.96876e+06	66.31	0.33	-1.59	0.00699301	2.16	0.14968	1.77558	292.115	103.9	1.7	Down
M292T124	M292T124	9.4447e+07	7.82937e+07	8.67571e+07	1.46071e+08	1.16415e+08	7.72505e+07	8.8591e+07	6.31453e+07	6.03554e+07	1.38384e+07	1.11631e+08	4.821e+07	4.58488e+07	7.17213e+07	6.78785e+07	8.71015e+07	9.38713e+07	8.7674e+07	27.82	6.33231e+07	6.4117e+07	46.16	1.48	0.57	0.0379176	1.42	0.297283	1.45156	292.175	123.9	2.1	Up
M292T444	M292T444	6.11261e+06	5.64229e+06	5.89163e+06	1.32611e+07	1.06382e+07	7.16399e+06	1.80721e+07	1.06334e+07	2.53427e+06	7.05409e+06	2.60368e+06	2.03832e+06	3.13484e+06	7.0669e+06	8.08996e+06	5.80273e+06	9.67692e+06	8.8987e+06	45.35	4.7906e+06	4.46878e+06	51.38	2.02	1.01	0.0281274	1.55	0.261699	1.87885	292.442	443.5	7.4	Up
M292T770	M292T770	3.2047e+06	2.1492e+06	1.8042e+06	1.46411e+06	2.20916e+06	2.41973e+06	1.76053e+06	2.29623e+06	5.64404e+06	2.59629e+06	4.71253e+06	2.78522e+06	2.99771e+06	2.80387e+06	3.09454e+06	4.09547e+06	2.16348e+06	2.17918e+06	24.4	3.59121e+06	3046125	30.84	0.6	-0.73	0.0029526	2.53	0.116769	2.14816	292.211	769.8	12.8	Down
M293T107	M293T107	1.30017e+06	1.22775e+06	1.33496e+06	651521	1.243e+06	1.28633e+06	534333	707254	7.56043e+06	1.24891e+06	3.53067e+06	5.2277e+06	6.5962e+06	2.32791e+06	939776	2.78658e+06	1.03566e+06	1.23537e+06	32.83	3.77727e+06	3.15862e+06	64.81	0.27	-1.87	0.0104118	1.98	0.169968	2.1169	293.08	107.3	1.8	Down
M293T114_2	M293T114_2	9.41032e+06	1.23379e+07	2.00198e+07	9.60198e+06	1.63592e+07	8.40808e+06	1.16222e+07	1.27754e+07	1.96091e+06	6.87733e+06	2.26884e+06	7.37824e+06	1.10163e+07	2.41146e+06	2.19788e+06	5.73907e+06	1.25669e+07	1.198e+07	31.11	4.98126e+06	4.07527e+06	66.65	2.52	1.34	0.0010878	2.96	0.0833774	2.18587	293.134	114	1.9	Up
M293T283	M293T283	8.80673e+06	1.08116e+07	1.15302e+07	8.22894e+06	3.32435e+06	1.25977e+07	1.03613e+07	9.20602e+06	1.13669e+06	576612	1.29679e+06	497867	874445	3.04183e+06	6.16684e+06	6.58545e+06	9.35836e+06	9.78367e+06	30.32	2.52207e+06	1.21674e+06	99.5	3.71	1.89	0.000621601	3.21	0.069967	2.23816	293.09	283.4	4.7	Up
M293T319	M293T319	208270	131279	190937	202445	181962	212737	222316	221449	181254	188673	155909	81515.9	185246	145420	186373	151004	196424	205357	15.18	159425	168582	22.58	1.23	0.3	0.0206682	1.68	0.228643	1.33626	293.116	319.5	5.3	Up
M293T444	M293T444	612827	518836	620953	382639	860383	486098	531620	463949	391959	323026	278393	305805	455263	780015	346116	267138	559663	525228	25.75	393464	334571	42.67	1.42	0.51	0.014763	1.83	0.200021	1.62651	292.944	443.6	7.4	Up
M293T523_2	M293T523_2	893433	1.855e+06	1.74114e+06	2.43029e+06	2.31671e+06	1.28022e+06	1.72587e+06	1.97307e+06	774108	1.1871e+06	741797	1.02076e+06	195745	110713	834250	177363	1.77696e+06	1.79807e+06	28.49	630228	757952	65.73	2.82	1.5	0.000621601	3.21	0.069967	2.1188	293.204	523.2	8.7	Up
M293T577	M293T577	3.72401e+06	764514	1.46442e+06	940606	6.13419e+06	662035	1.19728e+06	1.34769e+06	1.00357e+07	6.42908e+06	1.33926e+07	3.64036e+06	7.04887e+06	671092	4.97254e+06	6.68708e+06	2.02934e+06	1.27249e+06	94.7	6.60966e+06	6.55808e+06	58.52	0.31	-1.7	0.0206682	1.68	0.228643	1.86437	293.161	576.9	9.6	Down
M293T619	M293T619	5.00729e+06	2.3231e+06	3.30408e+06	2.07208e+06	4.47476e+06	5.52592e+06	7.70011e+06	4.56015e+06	1.22947e+07	1.39855e+07	5.52038e+06	5.39741e+06	8.23854e+06	3.86414e+06	7.6729e+06	9.51438e+06	4.37094e+06	4.51746e+06	41.91	8.311e+06	7.95572e+06	42.17	0.53	-0.93	0.0206682	1.68	0.228643	1.8671	293.205	619.2	10.3	Down
M293T654	M293T654	898522	1.27511e+06	1.53748e+06	2.32814e+06	1.0648e+06	1.03894e+06	1.26753e+06	1.24818e+06	765116	940734	564410	892294	501996	1.64724e+06	829732	277438	1.33234e+06	1.25785e+06	33.5	802370	797424	50.86	1.66	0.73	0.0104118	1.98	0.169968	1.79359	293.214	654.1	10.9	Up
M293T766	M293T766	960081	183054	1.1469e+06	1.89217e+06	910196	898499	501596	895823	230929	11629.2	457012	447744	421801	861161	1.07869e+06	45527.1	923540	904348	53.63	444312	434773	83.72	2.08	1.06	0.0379176	1.42	0.297283	1.39016	293.201	766	12.8	Up
M294T116_2	M294T116_2	629505	641403	598110	678462	697081	750680	645529	742169	805290	1.32714e+06	1.02263e+06	674512	923676	913385	987291	980590	672867	661995	8.08	954314	952133	19.75	0.71	-0.5	0.0018648	2.73	0.096514	2.2653	294.477	116.5	1.9	Down
M294T187	M294T187	2.8762e+07	2.74441e+07	2.73249e+07	2.85686e+07	2.08603e+07	3.40949e+07	2.29937e+07	2.7204e+07	5.30013e+07	2.75147e+07	5.59408e+07	6.19288e+07	5.41846e+07	3.30037e+07	2.92274e+07	2.9113e+07	2.71566e+07	2.73845e+07	14.58	4.29893e+07	4.30025e+07	33.75	0.63	-0.66	0.004662	2.33	0.129379	1.87273	294.155	186.6	3.1	Down
M294T379_2	M294T379_2	1.05957e+06	1.12005e+06	1.56893e+06	887753	1.83646e+06	1.83669e+06	1.37871e+06	1.4499e+06	2.14464e+06	2.91215e+06	4.11268e+06	1.67423e+06	1.81067e+06	1.22108e+06	2.05235e+06	1.75036e+06	1.39226e+06	1.41431e+06	25.3	2.20977e+06	1.93151e+06	41.11	0.63	-0.67	0.0281274	1.55	0.261699	1.71118	294.064	378.6	6.3	Down
M294T392	M294T392	203666	82764.6	290423	34781.6	75540.9	38313.3	93851.6	80889.8	154172	271769	293037	361286	219177	82054.5	244054	284168	112529	81827.2	78.85	238715	257911	36.53	0.47	-1.08	0.0206682	1.68	0.228643	1.92271	294.144	392	6.5	Down
M294T431	M294T431	811243	948711	884869	723252	1.11916e+06	875211	1.08212e+06	1.04211e+06	711670	688685	562279	382888	705591	728609	662037	861518	935835	916790	14.75	662910	697138	21.12	1.41	0.5	0.0010878	2.96	0.0833774	2.01809	294.134	430.6	7.2	Up
M294T548	M294T548	1.57853e+07	7.82234e+06	7.38726e+06	9.43958e+06	1.89225e+07	1.16642e+07	8.54523e+06	8.31315e+06	2.58806e+07	3.14806e+07	3.56759e+07	1.66773e+07	1.26975e+07	1.54132e+07	1.33955e+07	2.0886e+07	1.09849e+07	8.9924e+06	38.46	2.15133e+07	1.87817e+07	40.2	0.51	-0.97	0.00699301	2.16	0.14968	2.06009	294.19	548.3	9.1	Down
M294T59	M294T59	3.6385e+06	4.1598e+06	4.26366e+06	4.49837e+06	3.36106e+06	4.30092e+06	4.30575e+06	4.80379e+06	3.14474e+06	3.85693e+06	2.82724e+06	2.98275e+06	2.92446e+06	3.77046e+06	3.31253e+06	1.01575e+06	4.16648e+06	4.28229e+06	11.08	2.97936e+06	3.06374e+06	29.52	1.4	0.48	0.0018648	2.73	0.096514	1.66388	293.919	58.9	1	Up
M294T619	M294T619	371141	596211	455920	154537	347101	647351	483998	550287	873985	689219	606512	559500	1.15553e+06	563576	477359	1.07022e+06	450818	469959	35.14	749488	647866	33.91	0.6	-0.73	0.014763	1.83	0.200021	1.76444	294.208	619.2	10.3	Down
M294T653	M294T653	244765	344390	144067	179664	258043	396572	360044	516244	603571	938590	382630	446384	505519	397526	517233	597309	305474	301217	40.1	548595	511376	32.4	0.56	-0.84	0.0029526	2.53	0.116769	1.99049	294.164	652.8	10.9	Down
M295T82_2	M295T82_2	587000	559513	601457	496385	410673	764690	445486	465634	1.22632e+06	538815	1.07412e+06	1.39561e+06	1.12114e+06	611584	587176	660166	541355	527949	20.94	901865	867141	37.49	0.6	-0.74	0.0104118	1.98	0.169968	1.86124	294.896	81.8	1.4	Down
M296T289	M296T289	4.4185e+06	2.228e+06	3.97067e+06	2.80803e+06	1.52704e+06	3.15888e+06	4.65461e+06	4.95066e+06	5.20947e+06	5.039e+06	8.01918e+06	4.12857e+06	8.16657e+06	4.61895e+06	3.61448e+06	3.62022e+06	3.46455e+06	3.56477e+06	35.52	5.30206e+06	4.82898e+06	34.33	0.65	-0.61	0.0498834	1.3	0.330421	1.63083	295.896	288.9	4.8	Down
M296T348	M296T348	196593	286654	192006	176039	241933	214547	174198	221591	297174	301782	274243	263004	329350	244970	236285	329207	212945	205570	17.68	284502	285708	12.55	0.75	-0.42	0.0029526	2.53	0.116769	2.15262	296.098	348	5.8	Down
M296T446	M296T446	414645	1.07502e+06	570218	347170	516331	451153	902218	924009	268881	233729	1.2053e+06	432899	243343	290268	275677	351091	650095	543274	42.33	412649	282973	79.2	1.58	0.66	0.0281274	1.55	0.261699	1.55478	295.863	446.5	7.4	Up
M296T520_2	M296T520_2	564664	1.54369e+06	1.18249e+06	885949	901546	1.03072e+06	940423	1.11967e+06	759278	551075	268295	814879	817231	845884	309740	661730	1.02114e+06	985572	27.61	628514	710504	36.74	1.62	0.7	0.0029526	2.53	0.116769	1.8005	296.198	520.2	8.7	Up
M296T88	M296T88	964106	796960	560231	364053	4.77425e+06	649401	823254	1.61402e+06	9.9059e+06	7.81529e+06	1.53297e+07	1.4821e+07	9.13565e+06	430701	1.27029e+06	1.07278e+06	1.31828e+06	810107	109.57	7.47266e+06	8.47547e+06	80.54	0.18	-2.5	0.0281274	1.55	0.261699	1.70682	296.096	88.3	1.5	Down
M297T100	M297T100	2.91238e+06	3.5259e+06	2.57935e+06	2.83967e+06	2.98183e+06	2.61088e+06	4.23951e+06	3.99803e+06	1.24255e+06	3.93624e+06	984260	795066	1.38049e+06	2.53464e+06	3.40102e+06	2.65191e+06	3.21094e+06	2.9471e+06	19.75	2.11577e+06	1.95757e+06	55.8	1.52	0.6	0.0498834	1.3	0.330421	1.61282	297.201	99.9	1.7	Up
M297T373	M297T373	1.96924e+06	4.66145e+06	3.41098e+06	2.47046e+06	2.6952e+06	2.23454e+06	1.79375e+06	2.17896e+06	1.54912e+06	912063	2.25393e+06	2.42423e+06	951699	670942	1.226e+06	1.72201e+06	2.67682e+06	2.3525e+06	35.28	1.46375e+06	1.38756e+06	43.76	1.83	0.87	0.0104118	1.98	0.169968	1.98358	297.111	372.7	6.2	Up
M297T413	M297T413	423550	762920	414115	645414	430447	521788	462220	544529	402380	61993.7	863574	212176	224541	119569	43182	457038	525623	492004	23.52	298057	218359	91.56	1.76	0.82	0.0281274	1.55	0.261699	1.71921	297.154	413.3	6.9	Up
M298T312	M298T312	1.85256e+07	1.89061e+07	1.50441e+07	1.30762e+07	1.85145e+07	2.18738e+07	2.05828e+07	1.85293e+07	2.8049e+07	2.84825e+07	2.25818e+07	2.48092e+07	2.59649e+07	1.95792e+07	1.54237e+07	2.44003e+07	1.81316e+07	1.85275e+07	15.62	2.36613e+07	2.46047e+07	18.58	0.77	-0.38	0.0104118	1.98	0.169968	1.78013	298.114	312.2	5.2	Down
M298T332	M298T332	3.70569e+07	3.28885e+07	3.49032e+07	4.8942e+07	4.53377e+06	3.35745e+07	2.90653e+07	3.09976e+07	2.02361e+07	3.44632e+06	1.78059e+07	2.54571e+07	1.62668e+07	1.75598e+07	1.50831e+07	1.3004e+07	3.14952e+07	3.32315e+07	39.55	1.61074e+07	1.69133e+07	39.3	1.96	0.97	0.00699301	2.16	0.14968	1.34291	298.114	331.5	5.5	Up
M298T618	M298T618	950099	884517	1.45176e+06	892916	969244	892874	1.19515e+06	1.60575e+06	852869	935653	794068	541492	597318	630254	932206	505468	1.10529e+06	959671	25.59	723666	712161	24.25	1.53	0.61	0.004662	2.33	0.129379	2.00493	298.201	618.1	10.3	Up
M298T633	M298T633	77399.7	105936	51245.7	39992.7	92241.8	62462.1	64190.6	58964.6	66658.3	139456	80388.1	382617	134200	120522	55871.7	144289	69054.2	63326.3	31.43	140500	127361	73.82	0.49	-1.02	0.0281274	1.55	0.261699	1.61586	298.147	632.7	10.5	Down
M298T73	M298T73	6.18249e+06	5.85674e+06	6.18814e+06	5.89509e+06	4.03496e+06	5.09869e+06	4.98503e+06	5.60344e+06	6.61084e+06	6.81012e+06	6.07444e+06	7.40752e+06	1.02779e+07	6.02241e+06	8.67876e+06	9.63282e+06	5.48057e+06	5.73009e+06	13.45	7.68935e+06	7.10882e+06	21.35	0.71	-0.49	0.0018648	2.73	0.096514	2.10101	298.186	72.9	1.2	Down
M299T314	M299T314	2.81884e+06	6.41703e+06	2.29532e+06	2.86912e+06	6.82777e+06	9.52864e+06	8.05655e+06	3.23299e+06	1.0739e+07	1.1874e+07	1.06108e+07	1.10528e+07	1.13341e+07	5.89179e+06	1.00507e+07	1.04351e+07	5.25578e+06	4.82501e+06	53.05	1.02485e+07	1.06749e+07	18.03	0.51	-0.96	0.0018648	2.73	0.096514	2.04582	299.082	314.5	5.2	Down
M299T632	M299T632	87683.1	225834	133742	122034	501160	83581.2	129602	111790	195656	139156	202466	922794	301282	252402	168348	130734	174428	125818	79.77	289105	199061	90.71	0.6	-0.73	0.0498834	1.3	0.330421	1.10631	299.178	632.5	10.5	Down
M299T97	M299T97	2.3527e+06	1.62144e+06	1.9793e+06	1.50878e+06	2.29855e+06	1.06401e+06	1.87813e+06	1.43883e+06	2.10364e+06	3.21728e+06	3.42958e+06	2.12468e+06	2.12281e+06	2.25319e+06	2.06124e+06	2.56927e+06	1.76772e+06	1.74979e+06	25.05	2.48521e+06	2.18894e+06	21.91	0.71	-0.49	0.0206682	1.68	0.228643	1.89252	299.091	97.3	1.6	Down
M300T232	M300T232	6.34125e+07	4.78997e+07	5.01574e+07	7.77665e+07	2.2524e+07	9.24408e+06	1.35109e+07	1.31987e+07	7.15195e+07	9.68179e+07	1.18684e+08	5.18076e+07	4.92583e+07	5.01237e+07	7.25323e+07	8.4364e+07	3.72142e+07	3.52118e+07	69.99	7.43884e+07	7.20259e+07	33.34	0.5	-1	0.0206682	1.68	0.228643	1.8402	300.086	232.3	3.9	Down
M300T314	M300T314	973838	1.3182e+06	965372	1.21984e+06	1.272e+06	1.31993e+06	1.60863e+06	1.53983e+06	1.59204e+06	2.20622e+06	1.72797e+06	1.45673e+06	1.39518e+06	1.62019e+06	2.06944e+06	1.9045e+06	1.27721e+06	1.2951e+06	18.12	1.74653e+06	1.67408e+06	16.6	0.73	-0.45	0.0029526	2.53	0.116769	2.00393	299.584	314.3	5.2	Down
M300T385_2	M300T385_2	1.75052e+06	5.19061e+06	1.90945e+06	2.48844e+06	8.24963e+06	4.19058e+06	4.42598e+06	4.65016e+06	2.53662e+06	1.7044e+06	6.25645e+06	813863	1.44363e+06	1.49107e+06	807927	1.14244e+06	4.10692e+06	4.30828e+06	51.85	2.02455e+06	1.46735e+06	88.79	2.03	1.02	0.0206682	1.68	0.228643	1.78085	300.104	385.2	6.4	Up
M300T395	M300T395	630690	146520	1.16867e+06	786121	1.0379e+06	686853	1.05093e+06	497456	615913	333957	208236	67100.6	593479	407352	535242	307806	750643	736487	44.93	383636	370654	50.31	1.96	0.97	0.0206682	1.68	0.228643	1.36468	300.118	395	6.6	Up
M300T436	M300T436	1.63106e+07	1.23148e+07	1.07057e+07	1.48704e+07	2.05859e+07	2.00879e+07	2.75265e+07	3.34898e+07	8.36076e+06	2.5766e+07	8.48112e+06	3.42753e+06	4.40502e+06	9.11963e+06	2.06246e+07	6.91459e+06	1.94864e+07	1.81992e+07	39.86	1.08874e+07	8.42094e+06	73.23	1.79	0.84	0.0379176	1.42	0.297283	1.68544	300.198	436.1	7.3	Up
M300T793_2	M300T793_2	3.08505e+07	1.02813e+07	1.3537e+07	4.22271e+07	2.61448e+07	1.42243e+07	1.92507e+07	1.78877e+07	7.1584e+06	3.96251e+06	9.23568e+06	1.43486e+07	8.34391e+06	1.3294e+07	1.8551e+07	1.90168e+06	2.18004e+07	1.85692e+07	48.98	9.59947e+06	8.7898e+06	57.74	2.27	1.18	0.0104118	1.98	0.169968	1.83035	300.325	792.6	13.2	Up
M301T114	M301T114	69300	25161.8	72061.6	57408	13598.4	87724.8	62059.7	447523	1.4526e+06	52838.7	2.18812e+06	1.97413e+06	1.23819e+06	1.61657e+06	126633	300526	104355	65679.9	134.94	1.1187e+06	1.3454e+06	75.84	0.09	-3.42	0.0104118	1.98	0.169968	2.06889	301.122	114	1.9	Down
M301T140	M301T140	1.22391e+07	1.35333e+07	1.31281e+07	1.04846e+07	1.30514e+07	1.25912e+07	1.23867e+07	1.23706e+07	1.40867e+07	1.08778e+07	1.27344e+07	1.32978e+07	1.42405e+07	1.34058e+07	1.43804e+07	1.3279e+07	1.24731e+07	1.2489e+07	7.38	1.32878e+07	1.33518e+07	8.47	0.94	-0.09	0.0498834	1.3	0.330421	1.14461	301.087	139.8	2.3	Down
M301T192	M301T192	1.12334e+06	1.16524e+06	1.02438e+06	1.03369e+06	1.23303e+06	1.27108e+06	1.1177e+06	1.00368e+06	1.15866e+06	1.30255e+06	1.18511e+06	1.0442e+06	1.47175e+06	1.52122e+06	1.2662e+06	1.37151e+06	1.12152e+06	1.12052e+06	8.77	1.29015e+06	1.28438e+06	12.52	0.87	-0.2	0.0281274	1.55	0.261699	1.67515	301.051	192.2	3.2	Down
M301T804	M301T804	1.84243e+06	3.91805e+06	2.41822e+06	3.00295e+06	1.62392e+06	3.14593e+06	2.72507e+06	2.9148e+06	4.78003e+06	2.19418e+06	8.86957e+06	3.26772e+06	6.64325e+06	2.64605e+06	3.30323e+06	1.02499e+07	2.69892e+06	2.81994e+06	27.28	5.24424e+06	4.04163e+06	57.7	0.51	-0.96	0.0498834	1.3	0.330421	1.57393	301.284	803.7	13.4	Down
M302T342	M302T342	499226	880692	567183	309777	446791	869940	779233	781829	987191	1.49102e+06	916599	828888	997335	598921	592741	1.22887e+06	641834	673208	33.4	955195	951895	31.67	0.67	-0.57	0.0206682	1.68	0.228643	1.57741	302.171	342	5.7	Down
M302T408	M302T408	1.08508e+06	2.03774e+06	1.71295e+06	964363	2.02e+06	1.83559e+06	1.31738e+06	1.34258e+06	2.29943e+06	1.50888e+06	2.04959e+06	2.01481e+06	2.67316e+06	2.54099e+06	2.0577e+06	1.80696e+06	1.53946e+06	1.52776e+06	27.14	2.11894e+06	2.05364e+06	17.9	0.73	-0.46	0.014763	1.83	0.200021	1.78243	302.206	407.8	6.8	Down
M302T619	M302T619	718708	596295	317912	1.68862e+06	1.28537e+06	643035	615928	804653	157972	182454	212656	457647	165421	762486	631051	167562	833815	680871	52.77	342156	197555	70.85	2.44	1.29	0.014763	1.83	0.200021	1.99669	302.14	619.2	10.3	Up
M302T692	M302T692	508174	1.10913e+06	618505	1.46642e+06	749841	960558	859946	780591	874395	1.21136e+06	1.4175e+06	1.19395e+06	1.10321e+06	975041	1.21477e+06	1.74376e+06	881646	820269	34.21	1.21675e+06	1.20265e+06	22.12	0.72	-0.46	0.0281274	1.55	0.261699	1.53824	302.269	691.7	11.5	Down
M302T768	M302T768	9.65139e+06	1.2966e+07	9.06913e+06	1.46252e+07	3.91845e+07	2.32493e+07	2.57992e+07	1.58682e+07	6.79089e+06	1.00829e+07	3.78913e+06	1.47595e+06	6.40925e+06	3.6857e+06	2.30908e+06	6.05197e+06	1.88016e+07	1.52467e+07	54.04	5074364	4.92055e+06	55.21	3.71	1.89	0.000621601	3.21	0.069967	2.33574	302.223	767.6	12.8	Up
M302T782	M302T782	1.07618e+08	7.65202e+07	9.11874e+07	1.70493e+08	1.17962e+08	5.33856e+07	7.95896e+07	3.61219e+07	3.36279e+07	9.80612e+06	4.59739e+07	6.26218e+07	4.25029e+07	1.04792e+08	7.94167e+07	5.49735e+06	9.16097e+07	8.53885e+07	45.36	4.80298e+07	4.42384e+07	70.09	1.91	0.93	0.0379176	1.42	0.297283	1.51177	302.305	781.6	13	Up
M303T727	M303T727	469765	436234	529452	432178	251199	412558	151270	416579	272488	354755	98571.1	243126	331397	239139	322189	302891	387404	424378	31.94	270570	287689	29.9	1.43	0.52	0.0379176	1.42	0.297283	1.19163	303.263	727.1	12.1	Up
M303T77	M303T77	2.82227e+06	3.25384e+06	3.40923e+06	3.55458e+06	2.65153e+06	3.52026e+06	3.49618e+06	3.42061e+06	2.54608e+06	3.09319e+06	2.59213e+06	2.4439e+06	2.34288e+06	2.4618e+06	2.4643e+06	2.27655e+06	3.26606e+06	3.41492e+06	10.48	2.5276e+06	2.46305e+06	9.88	1.29	0.37	0.000621601	3.21	0.069967	2.41252	303.241	77.3	1.3	Up
M303T88	M303T88	7.83434e+06	4.10878e+07	1.10425e+07	7.9833e+06	1.38211e+07	2.58137e+07	1.80103e+07	1.38807e+07	6.60168e+06	1.17786e+07	7.34354e+06	6.96096e+06	5.89576e+06	7.79297e+06	6.67423e+06	1.6019e+07	1.74342e+07	1.38509e+07	64.24	8.63334e+06	7.15225e+06	40.38	2.02	1.01	0.0104118	1.98	0.169968	1.71442	303.046	88.1	1.5	Up
M303T90	M303T90	2.07027e+06	1.39449e+06	1.49308e+06	1.86438e+06	2.08511e+06	253276	222068	1.40223e+06	162701	909701	243134	655953	167630	1.55653e+06	1.22838e+06	231171	1.34811e+06	1.44766e+06	54.83	644400	449543	83.66	2.09	1.06	0.0498834	1.3	0.330421	1.24669	303.122	89.7	1.5	Up
M304T116	M304T116	342043	308122	335082	310008	296324	267479	351451	327664	674511	397251	591593	762124	475555	310714	361751	444641	317272	318836	8.64	502267	460098	31.63	0.63	-0.66	0.0018648	2.73	0.096514	2.0578	303.563	116	1.9	Down
M304T352	M304T352	967007	1.22091e+06	1.24817e+06	1.24768e+06	1.90907e+06	2.98918e+06	2.37847e+06	1.44812e+06	1.67117e+06	964949	738689	859761	1.51714e+06	860753	872281	977191	1.67608e+06	1.34814e+06	41.58	1.05774e+06	918615	32.29	1.58	0.66	0.0281274	1.55	0.261699	1.68833	304.132	352.4	5.9	Up
M304T608	M304T608	2.06557e+06	3.23176e+06	4.63283e+06	1.91423e+06	1.38587e+06	2.18908e+06	2.72022e+06	1.23072e+06	954438	989927	490529	1.95568e+06	1.13965e+06	1.19883e+06	460258	3.81741e+06	2.42128e+06	2.12732e+06	45.68	1.37584e+06	1.06479e+06	79.3	1.76	0.82	0.0206682	1.68	0.228643	1.60921	304.284	607.9	10.1	Up
M304T749_2	M304T749_2	1.00802e+06	1.77361e+06	2.55559e+06	1.20137e+06	1.25816e+06	880686	1.59606e+06	1.451e+06	763895	510628	1.05459e+06	1.00178e+06	613950	2.44136e+06	1.15355e+06	399453	1.46556e+06	1.35458e+06	36.15	992401	882838	64.95	1.48	0.56	0.0379176	1.42	0.297283	1.4582	304.222	748.8	12.5	Up
M305T408	M305T408	4.28844e+06	8.84893e+06	1.01298e+07	9.72553e+06	8.18118e+06	1.03704e+07	9.07851e+06	3.60506e+06	8.62927e+06	6.83037e+06	8.04582e+06	4.40009e+06	3.14637e+06	5.65421e+06	1.59007e+06	3.30666e+06	8.02849e+06	8.96372e+06	32.66	5.20036e+06	5.02715e+06	48.32	1.54	0.63	0.0281274	1.55	0.261699	1.45369	305.156	407.9	6.8	Up
M305T529	M305T529	465462	3.05936e+06	364253	6.98512e+06	1.5443e+07	1.0717e+07	1.95998e+07	2.12283e+07	127824	247228	3.2892e+06	1.62682e+06	246356	220746	141308	780136	9.73278e+06	8.85107e+06	85.86	834953	246792	133.55	11.66	3.54	0.00699301	2.16	0.14968	2.06447	305.214	529.2	8.8	Up
M305T725	M305T725	1.11469e+06	742501	827855	1.56182e+06	1.13388e+06	828214	813412	889222	476637	386554	304713	681384	750029	1.51057e+06	975970	299898	988949	858718	27.51	673219	579010	61.37	1.47	0.55	0.0498834	1.3	0.330421	1.53272	305.196	725	12.1	Up
M305T78	M305T78	1.46931e+06	1.48603e+06	1.25451e+06	1.4064e+06	1.45287e+06	1.32198e+06	1.56263e+06	1.39871e+06	1.66743e+06	1.49815e+06	1.41404e+06	1.43184e+06	1.69917e+06	1.57273e+06	1.54956e+06	2.38988e+06	1.41906e+06	1.42964e+06	6.83	1.65285e+06	1.56114e+06	19.03	0.86	-0.22	0.0206682	1.68	0.228643	1.51058	304.893	77.8	1.3	Down
M306T108	M306T108	2.37249e+06	2.05789e+06	3.03254e+06	1.88862e+06	1.4761e+06	1.93126e+06	1.88281e+06	1.87652e+06	5.1447e+06	2.45774e+06	2.39683e+06	3.39116e+06	3.97331e+06	2.5302e+06	2.99381e+06	1.87536e+06	2.06478e+06	1.90994e+06	22.38	3.09539e+06	2.76201e+06	34.04	0.67	-0.58	0.0281274	1.55	0.261699	1.80573	306.075	108.4	1.8	Down
M306T372_2	M306T372_2	194428	273914	271498	246689	287359	251777	312041	314633	140659	296509	273888	220673	164693	210961	179792	245360	269042	272706	14.5	216567	215817	24.9	1.24	0.31	0.0498834	1.3	0.330421	1.56699	306.145	372.4	6.2	Up
M306T529	M306T529	234201	134203	213446	351435	204906	192932	203394	208955	80772.8	67373.4	164378	138999	36737.5	217541	163543	14845	217934	206931	28.07	110524	109886	64.27	1.97	0.98	0.014763	1.83	0.200021	1.77267	306.218	529.2	8.8	Up
M306T635	M306T635	291219	546754	382595	454550	265782	487286	239425	323532	157524	262166	80720.6	249217	95758	259619	224762	533890	373893	353063	30.07	232957	236990	60.74	1.6	0.68	0.0206682	1.68	0.228643	1.64368	306.247	635	10.6	Up
M306T677	M306T677	176398	288834	607959	225238	182968	302859	173108	225023	210460	119366	66267	144118	190255	80959.4	30884.5	154523	272798	225131	52.82	124604	131742	49.91	2.19	1.13	0.004662	2.33	0.129379	1.90315	306.216	676.9	11.3	Up
M306T686	M306T686	156886	94123.6	156487	136881	75390.4	214076	59147.1	89393.3	186028	217591	156588	178844	194952	89789.3	177179	189006	122798	115502	42.5	173747	182436	21.9	0.71	-0.5	0.0379176	1.42	0.297283	1.53175	306.264	686.2	11.4	Down
M306T808	M306T808	8.04289e+06	3.6808e+06	8.2473e+06	4.67103e+06	4.10271e+06	4.43648e+06	5.01414e+06	3.76397e+06	3.65454e+06	4.31283e+06	3.45511e+06	2.9455e+06	4.33557e+06	2.46108e+06	2.8626e+06	2.51693e+06	5.24491e+06	4.55376e+06	35.17	3.31802e+06	3.2003e+06	22.44	1.58	0.66	0.004662	2.33	0.129379	1.8235	306.242	808.1	13.5	Up
M306T82	M306T82	1.53121e+06	1.40484e+06	1.35514e+06	1.39129e+06	1.59027e+06	1.44412e+06	1.56857e+06	1.58083e+06	1.58436e+06	1.62986e+06	1.50762e+06	1.5164e+06	1.54542e+06	1.70494e+06	1.65873e+06	1.65866e+06	1.48328e+06	1.48767e+06	6.4	1.60075e+06	1.60711e+06	4.57	0.93	-0.11	0.0379176	1.42	0.297283	1.7921	306.119	82.5	1.4	Down
M307T168_2	M307T168_2	1.27104e+08	7.85767e+07	1.40002e+08	1.06625e+08	1.48184e+08	1.01369e+08	9.63965e+07	9.0233e+07	4.17364e+08	2.13779e+08	2.68588e+08	4.64177e+08	3.80014e+08	1.10493e+08	1.13996e+08	1.83558e+08	1.11061e+08	1.03997e+08	22.29	2.68996e+08	2.41184e+08	51.04	0.41	-1.28	0.004662	2.33	0.129379	2.06925	307.07	168.3	2.8	Down
M307T646	M307T646	196342	153473	127406	125309	188428	143462	175889	207435	84215.8	75275.1	113013	138320	60429.8	178363	190729	49079.3	164718	164681	19.25	111178	98614.4	48.11	1.48	0.57	0.0498834	1.3	0.330421	1.64257	307.176	646.4	10.8	Up
M307T91	M307T91	1.57158e+06	451928	625217	290056	429824	372758	235954	195881	2.12901e+06	315024	3.4616e+06	2.22745e+06	3.22653e+06	2.81053e+06	479783	2.74835e+06	521650	401291	85.42	2.17478e+06	2.4879e+06	54.49	0.24	-2.06	0.00699301	2.16	0.14968	2.05483	307.042	90.6	1.5	Down
M308T371	M308T371	2.81914e+06	1.6042e+06	1.99966e+06	1.25587e+06	2.61699e+06	1.77425e+06	1.01027e+06	1.15904e+06	2.48625e+06	3.85635e+06	3.76146e+06	3.56858e+06	3.42201e+06	2.10805e+06	3.07172e+06	4.38642e+06	1.77993e+06	1.68923e+06	37.46	3.33261e+06	3.49529e+06	22.44	0.53	-0.9	0.0018648	2.73	0.096514	2.27378	308.09	371	6.2	Down
M308T375	M308T375	115196	107956	125439	122188	86714.2	78018	103835	84644.9	130992	186544	129325	130147	131745	99464.3	99676	165299	102999	105895	17.49	134149	130570	22.12	0.77	-0.38	0.0206682	1.68	0.228643	1.6898	307.988	375	6.2	Down
M308T483	M308T483	795808	1.03586e+06	735294	1.10004e+06	1.12774e+06	686225	635948	719205	68844.8	1.01451e+06	152115	191298	202079	844274	624579	446048	854515	765551	23.4	442969	324063	79.43	1.93	0.95	0.0206682	1.68	0.228643	1.78226	307.709	482.8	8	Up
M308T627	M308T627	412286	128480	146561	533239	449753	289354	117988	411885	88650.5	65869.4	101829	139516	68663	508972	403630	39253.5	311193	350620	52.54	177048	95239.6	100.02	1.76	0.81	0.0498834	1.3	0.330421	1.42303	308.221	626.7	10.4	Up
M308T89	M308T89	4.62761e+06	4.48784e+06	5.73098e+06	3.76308e+06	2.86517e+06	4.50148e+06	4.96334e+06	4.99271e+06	8.897e+06	5.13031e+06	9.31833e+06	9.16335e+06	5.89976e+06	3.76365e+06	5.08896e+06	4.76939e+06	4.49153e+06	4.56455e+06	19.2	6.50384e+06	5.51504e+06	34.62	0.69	-0.53	0.0281274	1.55	0.261699	1.56327	308.109	89.5	1.5	Down
M309T102	M309T102	462679	226718	489773	512608	565679	620915	552651	354049	979231	663306	1.18948e+06	637526	679230	578873	756402	607523	473134	501191	26.92	761446	671268	28.05	0.62	-0.69	0.000621601	3.21	0.069967	1.96129	309.074	101.7	1.7	Down
M309T114	M309T114	565396	670858	517964	784514	490121	822382	836103	898904	170951	432370	146773	14955.5	172610	361798	587591	548346	698280	727686	22.73	304424	267204	68.36	2.29	1.2	0.0029526	2.53	0.116769	1.75335	308.99	114	1.9	Up
M309T619	M309T619	8.37702e+06	3.12731e+06	2.56633e+06	9.413e+06	6.69841e+06	1.51815e+06	7.13767e+06	1.95598e+06	932947	1.21996e+06	1.34422e+06	2.72449e+06	1.1052e+06	5.17018e+06	4.16983e+06	1.09914e+06	5.09923e+06	4.91286e+06	61.6	2.22075e+06	1.28209e+06	73.56	2.3	1.2	0.0281274	1.55	0.261699	1.59071	309.23	619.2	10.3	Up
M309T76	M309T76	5.3935e+06	8.93111e+06	6.82783e+06	6.91172e+06	3.49824e+06	1.03031e+07	5.22693e+06	5.20658e+06	1.17896e+07	5.41825e+06	8.77518e+06	8.31184e+06	1.23949e+07	1.01461e+07	8.2215e+06	1.44256e+07	6.53738e+06	6.11066e+06	33.8	9.93538e+06	9.46063e+06	28.73	0.66	-0.6	0.0281274	1.55	0.261699	1.68301	309.165	76.5	1.3	Down
M309T89	M309T89	2.754e+08	7.83786e+07	2.86074e+08	3.53903e+08	2.89082e+08	2.8336e+08	1.67345e+08	1.89217e+08	1.64422e+08	1.62645e+08	1.0399e+08	1.06294e+08	8.32945e+07	8.16752e+07	7.88141e+07	9.93588e+07	2.40345e+08	2.7938e+08	36.75	1.10062e+08	1.01675e+08	31.44	2.18	1.13	0.0104118	1.98	0.169968	2.0693	309.128	89.3	1.5	Up
M309T98	M309T98	7.7133e+06	1.60208e+06	5.82964e+06	1.63653e+06	3.69758e+06	1.60009e+06	7.80527e+06	1.74188e+06	293577	7.00714e+06	284586	1.67966e+06	1.3965e+06	1.08337e+06	1.0436e+06	2.86255e+06	3.9533e+06	2.71973e+06	70.18	1.95637e+06	1.23993e+06	112.45	2.02	1.01	0.0498834	1.3	0.330421	1.37088	309.139	97.7	1.6	Up
M310T321	M310T321	2.84849e+06	1.45505e+07	9.89299e+06	1.4449e+07	1.27522e+07	1.47697e+07	1.5618e+07	1.80602e+07	6.75127e+06	1.35575e+07	6.89377e+06	5.92838e+06	1.46268e+06	7.8929e+06	9.46578e+06	2.84246e+06	1.28676e+07	1.44998e+07	36.3	6.84934e+06	6.82252e+06	54.87	1.88	0.91	0.0104118	1.98	0.169968	1.55882	310.175	321.4	5.4	Up
M310T76	M310T76	235781	165444	929137	770833	762168	180353	670458	717321	825449	193353	1.33537e+06	863455	770950	772477	1.02389e+06	987134	553937	693889	55.57	846511	844452	38.12	0.65	-0.61	0.0206682	1.68	0.228643	1.08938	310.168	76.4	1.3	Down
M310T92	M310T92	9.98971e+07	6.36362e+07	6.4056e+07	5.89625e+07	5.10779e+07	7.2411e+07	5.75636e+07	5.63099e+07	7.98395e+07	6.10343e+07	8.72766e+07	1.05213e+08	8.91199e+07	9.70293e+07	9.39095e+07	9.18842e+07	6.54893e+07	6.12994e+07	23.33	8.81633e+07	9.0502e+07	14.99	0.74	-0.43	0.0206682	1.68	0.228643	2.01675	310.113	92.2	1.5	Down
M311T101	M311T101	3.05652e+06	5.34249e+06	2.40984e+06	3.50068e+06	4.95596e+06	3.68126e+06	5.58727e+06	4.80459e+06	708910	4.68305e+06	1.20376e+06	1.55258e+06	940913	417895	849563	432605	4.16733e+06	4.24293e+06	27.85	1.34866e+06	895238	103.77	3.09	1.63	0.0018648	2.73	0.096514	2.34031	311.09	101.3	1.7	Up
M311T106	M311T106	5.43999e+06	4.52944e+06	6.60711e+06	6.00182e+06	2.04899e+07	4.42979e+06	5.34615e+06	5.04492e+06	2.52178e+07	1.7651e+07	4.70861e+07	2.17009e+07	1.69027e+07	5.12831e+06	1.9434e+07	2.34548e+07	7.23614e+06	5.39307e+06	74.67	2.20719e+07	2.05674e+07	53.55	0.33	-1.61	0.0104118	1.98	0.169968	2.1466	311.035	105.5	1.8	Down
M311T295	M311T295	2.3701e+06	3.18551e+06	2.39747e+06	2.49401e+06	2.41925e+06	3.30796e+06	3.77771e+06	3.10857e+06	1.91566e+06	1.95695e+06	1.4261e+06	1.98516e+06	1.76392e+06	998730	1.43965e+06	1.27388e+06	2.88257e+06	2.80129e+06	18.49	1.59501e+06	1.60179e+06	22.8	1.81	0.85	0.0001554	3.81	0.0532196	2.47496	311.127	294.6	4.9	Up
M311T559	M311T559	225263	282824	313872	118035	210708	530365	236479	293744	664922	391605	427829	319158	570467	412425	377913	391849	276411	259651	43.21	444521	402137	25.72	0.62	-0.69	0.004662	2.33	0.129379	1.90166	311.15	558.7	9.3	Down
M312T80	M312T80	4.03184e+06	5.75406e+06	4.68106e+06	4.39968e+06	3.77428e+06	6.16735e+06	5.15486e+06	5.04065e+06	3.25079e+06	4.97164e+06	3.7703e+06	5.53763e+06	3.18151e+06	3.19304e+06	3.42648e+06	3.71012e+06	4.87547e+06	4.86086e+06	16.87	3.88019e+06	3.5683e+06	22.93	1.26	0.33	0.0206682	1.68	0.228643	1.67583	311.916	79.9	1.3	Up
M313T108	M313T108	2.44337e+06	2.435e+06	2.33901e+06	2.62191e+06	1.54331e+06	2.12384e+06	2.17145e+06	2.15207e+06	2.97458e+06	1.48903e+06	2.7539e+06	2.53885e+06	2.83711e+06	2.69539e+06	2.66275e+06	2.93057e+06	2.22874e+06	2.25523e+06	14.64	2.61027e+06	2.72464e+06	18.2	0.85	-0.23	0.014763	1.83	0.200021	1.10948	313.07	108.3	1.8	Down
M313T117_1	M313T117_1	1.24804e+06	1.17921e+06	1.39703e+06	1.09621e+06	1.44493e+06	947828	1.15513e+06	1.09437e+06	3.09277e+06	1.84141e+06	2.89326e+06	1.68392e+06	1.43201e+06	1.05042e+06	2.10336e+06	1.36275e+06	1.19534e+06	1.16717e+06	13.74	1.93249e+06	1.76266e+06	37.73	0.62	-0.69	0.0206682	1.68	0.228643	1.88309	313.052	117.3	2	Down
M313T706	M313T706	145286	418456	263930	154799	178106	234570	216471	244795	525674	463145	225190	349931	314165	382490	305589	433823	232052	225521	37.35	375001	366210	25.81	0.62	-0.69	0.0104118	1.98	0.169968	1.9303	313.22	705.7	11.8	Down
M314T180	M314T180	1.32562e+08	7.13513e+07	1.246e+08	2.06838e+08	1.52458e+08	6.73337e+07	8.45814e+07	7.6688e+07	4.39101e+07	3.05547e+07	6.58066e+07	7.22256e+07	4.87308e+07	9.40419e+07	8.53167e+07	6.59499e+06	1.14552e+08	1.04591e+08	42.78	5.58977e+07	5.72687e+07	52.17	2.05	1.04	0.0206682	1.68	0.228643	1.67044	314.145	179.5	3	Up
M314T691	M314T691	1.09864e+06	842503	805446	1.20067e+06	1.15226e+06	861102	1.09378e+06	378923	160384	84436.3	215869	786512	513362	832299	332760	73219.3	929166	977440	29.04	374855	274314	81.06	2.48	1.31	0.0018648	2.73	0.096514	1.97092	314.231	691.5	11.5	Up
M314T759	M314T759	3.62995e+06	790151	2.53086e+06	1.42013e+06	2.72579e+06	2.4172e+06	1.27562e+06	1.29904e+06	689561	950831	1.03013e+06	1.19596e+06	1.13121e+06	1.32635e+06	1.44228e+06	1.20552e+06	2.01109e+06	1.91867e+06	47.75	1.12148e+06	1.16358e+06	20.82	1.79	0.84	0.0379176	1.42	0.297283	1.56011	314.231	759.3	12.7	Up
M314T805	M314T805	7.21404e+07	3.31677e+07	4.39712e+07	6.37147e+07	3.43528e+07	8.64837e+07	8.22529e+07	8.67988e+07	4.00947e+07	3.16508e+07	4.98807e+07	3.9058e+07	5.59886e+07	3.06636e+07	2.28651e+07	5.32226e+07	6.28603e+07	6.79276e+07	36.3	4.0428e+07	3.95763e+07	29.24	1.55	0.64	0.0498834	1.3	0.330421	1.55389	314.303	805.4	13.4	Up
M315T363	M315T363	366430	271352	325521	377465	395647	231046	292489	295797	202916	159406	246486	292265	197085	356059	344254	142364	319468	310659	17.88	242604	224701	33.52	1.32	0.4	0.0498834	1.3	0.330421	1.51884	315.103	363.4	6.1	Up
M315T378	M315T378	34808.8	207729	154625	186577	45950.2	49623.6	180251	127734	232811	43601.5	237192	580485	234396	599228	210581	145311	123412	141180	56.98	285451	233604	69.68	0.43	-1.21	0.0281274	1.55	0.261699	1.33451	315.108	377.7	6.3	Down
M315T416	M315T416	729852	988055	1.20115e+06	1.67687e+06	2.25495e+06	2.61289e+06	1.28534e+06	1.02526e+06	1.36066e+06	4.24587e+06	1.071e+06	2.27775e+06	2.95031e+06	1.97898e+06	2.76505e+06	5.4133e+06	1.4718e+06	1.24325e+06	44.84	2.75787e+06	2.5214e+06	52.97	0.53	-0.91	0.0281274	1.55	0.261699	1.55852	315.204	416	6.9	Down
M315T434	M315T434	2.71067e+06	6.96736e+06	7.60016e+06	590558	3.9868e+06	9.38943e+06	8.94188e+06	3.31324e+06	1.51043e+06	7.04054e+06	944734	1.05585e+06	976676	2.55635e+06	2.58103e+06	2.95535e+06	5.43751e+06	5.47708e+06	59.17	2.45262e+06	2.03339e+06	82.44	2.22	1.15	0.0498834	1.3	0.330421	1.28407	315.203	433.7	7.2	Up
M315T694	M315T694	1.88708e+06	2.52855e+06	4.27667e+06	4.29376e+06	4.14781e+06	4.2005e+06	3.02613e+06	5.07915e+06	4.21691e+06	2.28868e+06	2.91663e+06	2.86187e+06	2.42989e+06	2.0613e+06	1.82908e+06	2.13776e+06	3.67996e+06	4.17416e+06	29.32	2.59277e+06	2.35928e+06	29.18	1.42	0.51	0.0498834	1.3	0.330421	1.60608	315.134	694	11.6	Up
M315T76_2	M315T76_2	1.00813e+06	1.13781e+06	1.64267e+06	941989	758255	863221	1.7483e+06	1.0148e+06	1.7042e+06	1.74803e+06	1.30725e+06	1.78315e+06	1.08511e+06	1.08762e+06	1.8253e+06	1.14422e+06	1.1394e+06	1.01146e+06	31.77	1.46061e+06	1.50573e+06	22.89	0.78	-0.36	0.0379176	1.42	0.297283	1.39598	315.186	76	1.3	Down
M315T77	M315T77	700902	788793	711682	759248	616335	787475	813880	684784	572286	782901	582809	594381	520781	674224	565764	513519	732888	735465	9.04	600833	577548	14.75	1.22	0.29	0.004662	2.33	0.129379	2.02962	315.201	76.7	1.3	Up
M316T104	M316T104	220599	204489	246954	218493	289483	201487	351252	222590	441910	337116	817910	634957	375957	195060	251208	309266	244418	221595	21.09	420423	356536	49.66	0.58	-0.78	0.0379176	1.42	0.297283	1.64612	316.033	103.6	1.7	Down
M316T113	M316T113	1.74108e+06	4.82723e+06	2.4143e+06	3.18998e+06	2.71183e+06	1.74394e+06	2.82583e+06	2.85954e+06	1.75537e+06	1.94508e+06	1.86788e+06	1.41176e+06	1.4464e+06	1.58026e+06	1.57126e+06	1.42807e+06	2.78922e+06	2.76883e+06	34.97	1.62576e+06	1.57576e+06	12.72	1.72	0.78	0.004662	2.33	0.129379	2.21461	315.996	113.5	1.9	Up
M316T517	M316T517	5.2877e+06	1.31871e+07	4.24918e+06	1.00928e+07	1.4527e+07	4.36845e+06	7.96587e+06	9.62947e+06	892579	3.68903e+06	1.97937e+06	3.35093e+06	947332	1.79283e+06	1.19081e+06	773470	8.66344e+06	8.79767e+06	45.26	1.82704e+06	1.49182e+06	61.98	4.74	2.25	0.0001554	3.81	0.0532196	2.53497	316.211	517.2	8.6	Up
M316T91	M316T91	1.5403e+06	2.66579e+06	2.18213e+06	2.08909e+06	1.65596e+06	2.70429e+06	2.80747e+06	2.63623e+06	709732	1.74939e+06	1.4673e+06	467621	1.42395e+06	1.44541e+06	1.212e+06	1.14514e+06	2.28516e+06	2.40918e+06	21.67	1.20257e+06	1.31798e+06	35.33	1.9	0.93	0.000621601	3.21	0.069967	2.1563	316.079	91	1.5	Up
M317T372_2	M317T372_2	1.17903e+06	995449	1.81757e+06	772829	1.29445e+06	1.13186e+06	999465	1.00432e+06	3.83842e+06	1.43765e+06	1.76964e+06	1.22562e+06	1.25773e+06	1.2656e+06	2.06902e+06	1.03849e+06	1.14937e+06	1.06809e+06	27.07	1.73777e+06	1.35162e+06	52.46	0.66	-0.6	0.0379176	1.42	0.297283	1.46823	316.846	371.9	6.2	Down
M317T715	M317T715	1.6645e+06	2.50683e+06	3.7544e+06	2.43837e+06	2.1214e+06	2.16764e+06	2.79659e+06	1.80713e+06	1.7522e+06	1.94964e+06	1.51326e+06	1.46642e+06	1.77655e+06	1.03763e+06	1.60244e+06	2.72796e+06	2.40711e+06	2.30301e+06	27.32	1.72826e+06	1.67732e+06	28.17	1.39	0.48	0.0206682	1.68	0.228643	1.67073	317.213	715.4	11.9	Up
M317T741	M317T741	8.0779e+06	6.86716e+06	5.47522e+06	4.98951e+06	7.67341e+06	6.52004e+06	6.48148e+06	6.60303e+06	5.73428e+06	3.6907e+06	3.11378e+06	1.60651e+07	1.65243e+06	4.89436e+06	3.10022e+06	5.34038e+06	6.58597e+06	6.56154e+06	15.49	5.44891e+06	4.29253e+06	82.54	1.21	0.27	0.0281274	1.55	0.261699	1.18564	317.074	741.4	12.4	Up
M317T784	M317T784	3.61447e+08	2.30157e+08	4.14775e+08	6.50119e+08	6.13867e+08	3.51798e+08	4.78734e+08	4.24301e+08	2.10264e+08	1.6844e+08	2.08035e+08	2.16168e+08	1.38908e+08	3.72004e+08	5.16336e+08	4.05726e+07	4.4065e+08	4.19538e+08	31.49	2.33841e+08	2.09149e+08	62.82	1.88	0.91	0.014763	1.83	0.200021	1.75156	317.324	784.3	13.1	Up
M318T111	M318T111	303038	1.09177e+06	1.28446e+06	1.63826e+06	1.23081e+06	1.59411e+06	1.30411e+06	1.29308e+06	1.02379e+06	93309.1	1.0204e+06	704088	803656	334674	1.51194e+06	1.13525e+06	1.21746e+06	1.28877e+06	33.85	828389	912029	54.69	1.47	0.56	0.0498834	1.3	0.330421	1.1339	317.975	111.3	1.9	Up
M318T118	M318T118	9.05924e+06	5.655e+06	9.94963e+06	1.00634e+07	3.13021e+06	7.65392e+06	6.474e+06	6.54666e+06	3.85328e+06	963409	3.39065e+06	2.72697e+06	4.09815e+06	7.30966e+06	5.78917e+06	6.64475e+06	7.3165e+06	7.10029e+06	32.35	4.347e+06	3.97571e+06	48.75	1.68	0.75	0.0498834	1.3	0.330421	1.5345	318.039	118.2	2	Up
M318T123	M318T123	1.61845e+08	1.33068e+08	1.61639e+08	6.91323e+07	2.95393e+07	1.05632e+08	1.1154e+08	1.03206e+08	1.37161e+08	1.74363e+08	2.38833e+08	1.62998e+08	1.42244e+08	1.01653e+08	1.14869e+08	1.92651e+08	1.0945e+08	1.08586e+08	41	1.58097e+08	1.52621e+08	28.03	0.69	-0.53	0.0498834	1.3	0.330421	1.44087	318.118	123.2	2.1	Down
M318T143	M318T143	116634	64401.4	88110.8	89833.7	96318.6	55696	136462	94400.8	744537	564541	113361	508165	391586	150782	100900	595326	92732.1	92117.2	27.95	396150	449875	62.51	0.23	-2.09	0.0018648	2.73	0.096514	2.1852	318.118	143.5	2.4	Down
M318T626	M318T626	1.2915e+06	2.28628e+06	1.56561e+06	811451	446944	2.13363e+06	1.3884e+06	1.89756e+06	3.15486e+06	3.07622e+06	2.7747e+06	1.33127e+06	3.42772e+06	1.97743e+06	1.63103e+06	3.5287e+06	1.47767e+06	1.47701e+06	42.93	2.61274e+06	2.92546e+06	32.5	0.57	-0.82	0.0206682	1.68	0.228643	1.72718	318.214	626.3	10.4	Down
M318T665	M318T665	596656	992192	1.98286e+06	442713	1.54236e+06	650770	2.293e+06	2.15857e+06	770104	530856	822679	635868	590144	173146	183389	286241	1.33239e+06	1.26728e+06	56.63	499053	560500	51.22	2.67	1.42	0.0206682	1.68	0.228643	1.86647	318.162	665.3	11.1	Up
M318T668	M318T668	277025	133462	359518	101861	343861	139241	227945	268018	353665	464148	650773	480397	326394	155820	247060	411918	231366	247982	42.4	386272	382792	39.47	0.6	-0.74	0.0379176	1.42	0.297283	1.59557	318.174	667.8	11.1	Down
M318T744	M318T744	9.43544e+07	1.33009e+08	8.09818e+07	6.74766e+07	1.84405e+08	1.7976e+08	2.82647e+08	3.05301e+08	2.59583e+08	4.96305e+08	2.20204e+08	3.30381e+08	5.01405e+08	1.38504e+08	1.59835e+08	3.01893e+08	1.65992e+08	1.56384e+08	54.22	3.01014e+08	2.80738e+08	45.92	0.55	-0.86	0.0498834	1.3	0.330421	1.60102	318.299	743.8	12.4	Down
M319T109	M319T109	273848	385994	318176	196178	226335	362597	399172	383928	452544	475061	460419	407392	430364	237173	260180	441948	318279	340386	24.55	395635	436156	23.54	0.8	-0.31	0.0379176	1.42	0.297283	1.16233	319.06	108.8	1.8	Down
M319T123	M319T123	1.31397e+07	1.45531e+07	1.15132e+07	5.98804e+06	3.62722e+06	1.29554e+07	1.52037e+07	2.08718e+07	1.71163e+07	2.1547e+07	1.62223e+07	2.62858e+07	2.06641e+07	1.71481e+07	1.55684e+07	1.5755e+07	1.22315e+07	1.30476e+07	44.11	1.87884e+07	1.71322e+07	20.01	0.65	-0.62	0.004662	2.33	0.129379	1.66967	319.122	123.2	2.1	Down
M319T213	M319T213	1.5476e+06	861627	1.94679e+06	2.57449e+06	1.37291e+06	2.30939e+06	1.85806e+06	2.30822e+06	328354	2.20328e+06	319576	168611	322127	1.55878e+06	1.63803e+06	857937	1.84739e+06	1.90243e+06	30.7	924587	593146	83.84	2	1	0.0281274	1.55	0.261699	1.7638	319.095	212.6	3.5	Up
M319T99	M319T99	477987	503630	572637	459670	450753	576807	462851	469444	710063	558805	691705	553551	501426	502260	513617	639698	496722	473716	10.2	583891	556178	14.56	0.85	-0.23	0.0379176	1.42	0.297283	1.66377	318.514	98.8	1.6	Down
M320T363	M320T363	140297	205309	124990	172673	140668	197264	114398	102490	78885.9	83364.2	76094.7	116318	88959.4	82776.5	112311	107125	149761	140483	25.41	93229.3	86161.8	17.27	1.61	0.68	0.0018648	2.73	0.096514	2.23911	320.195	362.8	6	Up
M320T88	M320T88	159914	1.15923e+06	190797	104791	68024.6	221205	115819	76675.9	8.69171e+06	51526.9	8.34081e+06	4.84157e+06	5.94821e+06	1.50387e+06	294661	373102	262057	137867	139.85	3.75568e+06	3.17272e+06	97.36	0.07	-3.84	0.0206682	1.68	0.228643	1.80935	320.074	87.6	1.5	Down
M321T561	M321T561	1.16396e+06	1.28989e+07	94747.2	792219	1.66084e+07	3.5978e+06	8.12779e+06	1.12551e+07	1.30085e+07	2.73679e+07	2.0136e+07	4.74233e+06	1.14282e+07	4.01069e+06	2.9148e+07	1.17677e+07	6.81736e+06	5.86279e+06	92.45	1.52012e+07	1.23881e+07	62.52	0.45	-1.16	0.0498834	1.3	0.330421	1.41136	321.221	560.8	9.3	Down
M322T113	M322T113	1.15336e+06	1.0277e+06	1.26529e+06	1.31839e+06	1.45067e+06	1.03685e+06	1.21771e+06	1.05218e+06	1.65885e+06	1.97302e+06	2.5429e+06	1.46018e+06	1.26387e+06	1.0546e+06	1.6249e+06	1.06868e+06	1.19027e+06	1.18554e+06	12.74	1.58087e+06	1.54254e+06	31.55	0.75	-0.41	0.0498834	1.3	0.330421	1.46522	322.142	112.6	1.9	Down
M322T356	M322T356	1.93287e+06	3.28029e+06	1.90041e+06	1.65653e+06	2.51806e+06	3.44212e+06	2.3375e+06	2.58695e+06	1.56826e+06	574456	1.42436e+06	153914	1.44102e+06	1.16442e+06	1.0449e+06	753139	2.45684e+06	2.42778e+06	26.24	1.01556e+06	1.10466e+06	48.28	2.42	1.27	0.0001554	3.81	0.0532196	2.04492	322.074	356.4	5.9	Up
M322T555	M322T555	3.22764e+06	3.76336e+06	3.18966e+06	2.24096e+06	1.78608e+06	3.44569e+06	2.90674e+06	2.65475e+06	1.3716e+06	2.41857e+06	2.13305e+06	1.76385e+06	1.08626e+06	1.74653e+06	647174	1.13551e+06	2.90186e+06	3.0482e+06	22.45	1.53782e+06	1.55906e+06	38.17	1.89	0.92	0.0010878	2.96	0.0833774	2.14159	322.186	554.9	9.2	Up
M322T707	M322T707	8.22069e+06	3.38122e+06	3.34744e+06	6.89357e+06	4.75083e+06	3.43118e+06	4.78587e+06	5.79795e+06	1.05222e+06	758860	1.82131e+06	2.3912e+06	2.33696e+06	6.64849e+06	3.11538e+06	810352	5.07609e+06	4.76835e+06	35.3	2.36685e+06	2.07913e+06	81.31	2.14	1.1	0.004662	2.33	0.129379	1.9499	322.186	707.1	11.8	Up
M323T319	M323T319	6.41286e+06	9.11925e+06	6.95974e+06	7.27088e+06	6.52693e+06	7.08014e+06	7.66946e+06	7.86701e+06	1.66146e+06	5.96769e+06	1.32597e+06	1.68232e+06	1.55439e+06	3.57113e+06	3.91833e+06	3.9e+06	7.36328e+06	7.17551e+06	11.8	2.94766e+06	2.62672e+06	56.16	2.5	1.32	0.0001554	3.81	0.0532196	2.38776	323.069	318.5	5.3	Up
M323T707	M323T707	785042	521760	791025	1.65483e+06	1.23858e+06	503818	687323	305707	227633	102820	431176	498277	288567	562694	1.18364e+06	109797	811010	736183	54.04	425575	359872	82.39	1.91	0.93	0.0281274	1.55	0.261699	1.56378	323.19	707.1	11.8	Up
M323T82_1	M323T82_1	1.35579e+06	1.2396e+06	1.30903e+06	927287	828518	975540	1.26464e+06	1.17834e+06	1.43611e+06	1.36201e+06	2.11487e+06	1.39686e+06	1.78581e+06	1.05236e+06	1.33389e+06	1.58176e+06	1.13484e+06	1.20897e+06	17.34	1.50796e+06	1.41649e+06	21.38	0.75	-0.41	0.004662	2.33	0.129379	1.83043	322.844	82	1.4	Down
M324T111_1	M324T111_1	3.41819e+06	3.43477e+06	4.05269e+07	1.73181e+07	4.26934e+07	2.28129e+07	9.63155e+06	3.43552e+07	1.29093e+07	2.67255e+06	2.32059e+06	2.14951e+07	3.37482e+06	2.00989e+06	9.75575e+06	3.80017e+06	2.17739e+07	2.00655e+07	73.43	7.29228e+06	3.58749e+06	95.69	2.99	1.58	0.0379176	1.42	0.297283	1.57001	324.058	111.3	1.9	Up
M324T395	M324T395	110248	267001	259240	695517	530494	199379	329923	261079	181297	112858	101979	61018.6	68630.4	307291	292250	98367.8	331610	264040	57.31	152961	107418	63.85	2.17	1.12	0.0379176	1.42	0.297283	1.80227	324.112	395.4	6.6	Up
M324T412	M324T412	272769	291410	200007	268171	280520	296034	281310	268110	235399	217809	198051	251008	224366	237568	274631	178842	269791	276644	11.11	227209	229882	13.18	1.19	0.25	0.014763	1.83	0.200021	1.72856	323.546	412.1	6.9	Up
M324T420	M324T420	59512.6	15417.6	37214.6	45488	55448.7	21181.1	38064.1	71328.4	183636	407314	63506.2	382976	316301	77637	39026.4	93698	42956.9	41776	44.27	195512	138667	77.55	0.22	-2.19	0.0029526	2.53	0.116769	2.04023	324.195	419.9	7	Down
M324T759	M324T759	1.82585e+06	2.28179e+06	1.06973e+06	1.45886e+06	927308	2.49864e+06	1.16168e+06	1.24485e+06	2.05681e+06	3.15947e+06	1.80592e+06	2.1054e+06	3.11101e+06	1.82025e+06	1.81739e+06	4.71188e+06	1.55859e+06	1.35185e+06	37.42	2.57352e+06	2.08111e+06	40	0.61	-0.72	0.0498834	1.3	0.330421	1.78173	324.216	759.4	12.7	Down
M325T76	M325T76	1.0422e+07	1.04953e+07	1.08134e+07	1.2455e+07	1.11211e+07	1.14532e+07	1.12417e+07	1.12497e+07	5.80065e+06	1.04354e+07	6.57455e+06	6.04964e+06	6.01381e+06	9.66599e+06	1.07771e+07	9.34691e+06	1.11564e+07	1.11814e+07	5.76	8.083e+06	7.96073e+06	26.78	1.38	0.46	0.0010878	2.96	0.0833774	2.05234	325.159	76	1.3	Up
M325T770	M325T770	1.38598e+06	3.02856e+06	1.37014e+06	929868	1.80759e+06	3.19015e+06	2.11188e+06	2.12067e+06	2.37266e+06	4.44282e+06	2.94456e+06	2.86696e+06	3.95074e+06	2.38554e+06	2.61731e+06	4.26672e+06	1.9931e+06	1.95974e+06	40.04	3.23091e+06	2.90576e+06	26.42	0.62	-0.7	0.0206682	1.68	0.228643	1.86027	325.215	770	12.8	Down
M325T81	M325T81	7.05425e+06	4.61114e+06	9.97456e+06	8.08474e+06	5.11878e+06	7.52033e+06	7.00027e+06	7.2381e+06	1.03075e+07	8.15045e+06	1.41236e+07	1.10151e+07	7.77284e+06	8.66654e+06	8.45581e+06	1.38114e+07	7.07527e+06	7.14618e+06	23.62	1.02879e+07	9.48704e+06	24.52	0.69	-0.54	0.0029526	2.53	0.116769	1.87478	325.178	80.5	1.3	Down
M326T100	M326T100	153906	104931	73420.4	123076	108111	15436.4	104220	38014.8	3.52439e+06	3.62903e+06	4.15171e+06	4.39922e+06	3.49861e+06	3.46009e+06	3.37966e+06	3.97825e+06	90139.4	104576	50.44	3.75262e+06	3.57671e+06	10	0.02	-5.38	0.0001554	3.81	0.0532196	2.87004	326.063	99.6	1.7	Down
M326T76	M326T76	1.16892e+06	1.35741e+06	1.51395e+06	1.56245e+06	1.19002e+06	1.48367e+06	1.48746e+06	1.46994e+06	1.07539e+06	1.30795e+06	1.1202e+06	1.19451e+06	1.12923e+06	1.02074e+06	1.04208e+06	1.02801e+06	1.40423e+06	1.4768e+06	10.7	1.11476e+06	1.09779e+06	8.78	1.26	0.33	0.0018648	2.73	0.096514	2.35702	326.164	75.9	1.3	Up
M326T767	M326T767	96609.6	227996	553988	159131	899275	245467	185685	277532	1.11146e+06	770352	622492	1.90144e+06	465477	528374	336770	307466	330710	236731	80.74	755479	575433	70.21	0.44	-1.19	0.0206682	1.68	0.228643	1.68761	326.231	767	12.8	Down
M326T838	M326T838	1.14338e+07	1.38774e+07	1.16918e+07	1.32388e+07	8.26746e+06	6.79943e+06	5.69919e+06	9.36101e+06	4.01255e+06	6.60501e+06	4.01555e+06	6.8442e+06	6.79388e+06	5.12335e+06	7.77554e+06	1.37292e+07	1.00461e+07	1.03974e+07	29.76	6.86241e+06	6.69944e+06	45.19	1.46	0.55	0.0498834	1.3	0.330421	1.52125	326.24	838.2	14	Up
M326T97	M326T97	3.74614e+06	4.56832e+06	3.83884e+06	3.08355e+06	3.12129e+06	3.37901e+06	4.01693e+06	4.49384e+06	5.65092e+06	6.99009e+06	6.36761e+06	3.81977e+06	4.02793e+06	4.05528e+06	4.7971e+06	4.89287e+06	3.78099e+06	3.79249e+06	15.07	5.0752e+06	4.84498e+06	22.94	0.74	-0.42	0.0104118	1.98	0.169968	1.84165	326.137	97.3	1.6	Down
M326T99	M326T99	2.72886e+07	2.02388e+07	3.35352e+07	3.23293e+07	1.64958e+07	2.98867e+07	2.62117e+07	2.4398e+07	1.7137e+07	1.41768e+07	1.10213e+07	7.44211e+06	9.54511e+06	2.29688e+07	1.93567e+07	1.9378e+07	2.6298e+07	2.67501e+07	22.22	1.51282e+07	1.56569e+07	36.16	1.74	0.8	0.0029526	2.53	0.116769	2.04642	326.074	98.6	1.6	Up
M327T427_1	M327T427_1	2.21066e+06	1.21202e+06	3.02491e+06	1.06338e+07	1.72368e+07	8.22983e+06	1.93355e+06	1.71737e+06	2.09344e+07	1.55935e+07	2.17153e+07	3.23549e+06	9.36437e+06	9.85437e+06	9.96696e+06	9.94254e+06	5.77487e+06	2.61779e+06	99.97	1.25759e+07	9.95475e+06	50.4	0.46	-1.12	0.0379176	1.42	0.297283	1.66492	327.2	427	7.1	Down
M327T96	M327T96	2.67253e+06	2.7135e+06	2.70428e+06	2.82115e+06	2.72412e+06	2.79882e+06	2.82555e+06	2.65278e+06	2.89523e+06	3.4302e+06	3.25758e+06	3.07956e+06	2.74371e+06	2.94677e+06	2.66774e+06	2.96424e+06	2.73909e+06	2.71881e+06	2.46	2.99813e+06	2.9555e+06	8.45	0.91	-0.13	0.0206682	1.68	0.228643	1.74355	326.995	96.3	1.6	Down
M328T324	M328T324	538620	567384	536037	644362	480682	642283	570991	584956	317487	538049	96830.2	64544.3	305981	364393	421845	415965	570664	569188	9.62	315637	340940	51.39	1.81	0.85	0.000621601	3.21	0.069967	1.78017	328.096	323.9	5.4	Up
M328T361	M328T361	383852	342060	348873	383685	367438	320190	370424	375615	417515	512064	521247	475815	357573	415279	455804	353146	361517	368931	6.23	438555	436659	14.62	0.82	-0.28	0.0206682	1.68	0.228643	1.92664	328.154	360.6	6	Down
M328T471_2	M328T471_2	29316.6	2.41816e+06	832553	1.75897e+06	45894.9	636035	629835	631561	7305.86	22072	227430	12004.8	214669	305900	409913	48374.7	872790	633798	94.32	155959	131522	99.29	5.6	2.48	0.0206682	1.68	0.228643	1.60311	328.163	471.1	7.9	Up
M328T512_1	M328T512_1	2.24701e+06	1.80138e+06	2.66066e+06	4.34266e+06	2.76525e+06	4.22599e+06	4.38585e+06	4.33142e+06	936485	2.10177e+06	799952	599229	930916	845459	1.12396e+06	1.06044e+06	3.34503e+06	3.49562e+06	32.4	1.04978e+06	933700	43.3	3.19	1.67	0.0003108	3.51	0.0568482	2.59073	327.707	512	8.5	Up
M328T512_2	M328T512_2	1.77986e+06	1.51213e+06	2.29519e+06	2.00284e+06	2.63407e+06	1.93412e+06	1.87822e+06	1.8609e+06	406255	1.72716e+06	609079	441441	444037	781234	912211	535564	1.98717e+06	1.90617e+06	17.15	732123	572322	60.04	2.71	1.44	0.0003108	3.51	0.0568482	2.50915	327.957	512	8.5	Up
M328T78	M328T78	1.81489e+06	1.80522e+06	1.93111e+06	2.17401e+06	2.1242e+06	1.87622e+06	1.75269e+06	1.68887e+06	426583	1.50388e+06	1.87581e+06	1.76448e+06	413877	1.57371e+06	1.67694e+06	1.39736e+06	1.8959e+06	1.84556e+06	9.12	1329080	1.53879e+06	43.66	1.43	0.51	0.004662	2.33	0.129379	1.5017	328.053	78	1.3	Up
M329T137	M329T137	762432	883752	914089	877923	829520	1.00523e+06	1.1204e+06	984550	2.77584e+06	1.35771e+06	1.91931e+06	2.10645e+06	2.96283e+06	1.11246e+06	1.42174e+06	1.42322e+06	922236	898921	12.14	1.88494e+06	1.67127e+06	36.47	0.49	-1.03	0.0003108	3.51	0.0568482	2.34995	329.034	137.3	2.3	Down
M329T462_1	M329T462_1	1.09498e+06	904265	472289	948059	925234	1.15674e+06	472886	1.44658e+06	279350	1.10504e+06	366525	381173	338282	454603	938682	503087	927629	936646	35.64	545843	417888	55.85	1.7	0.77	0.0379176	1.42	0.297283	1.66306	328.533	462.4	7.7	Up
M330T318	M330T318	2.12791e+06	2.86155e+06	2.08633e+06	2.23949e+06	4.475e+06	2.11678e+06	1.96992e+06	2.30801e+06	1.47434e+06	2.02418e+06	2.16889e+06	3.20793e+06	1.52124e+06	1.74292e+06	1.44989e+06	1.70658e+06	2.52312e+06	2.1837e+06	33.06	1.912e+06	1.72475e+06	30.54	1.32	0.4	0.0379176	1.42	0.297283	1.44763	330.14	318.1	5.3	Up
M330T350	M330T350	1.13158e+06	1.1523e+06	1.39261e+06	1.5758e+06	1.13853e+06	1.00039e+06	1.13423e+06	951362	858032	595976	993327	1.06702e+06	666930	1.05093e+06	663381	508100	1.1846e+06	1.13638e+06	17.28	800462	762481	27.46	1.48	0.57	0.0029526	2.53	0.116769	2.07731	330.166	349.9	5.8	Up
M330T382	M330T382	1.95623e+06	1.53483e+06	2.07326e+06	3.32813e+06	2.88031e+06	3.15256e+06	1.88051e+06	2.36673e+06	1.34249e+06	1.40585e+06	1.06785e+06	1.09289e+06	868344	1.31366e+06	3.10286e+06	1.25506e+06	2.39657e+06	2.21999e+06	27.23	1.43112e+06	1.28436e+06	48.78	1.67	0.74	0.004662	2.33	0.129379	1.99671	330.202	382.2	6.4	Up
M330T408	M330T408	1.64203e+06	3.65303e+06	2.12981e+06	1.56033e+06	3.93413e+06	3.05493e+06	4.37384e+06	4.34879e+06	1.27332e+06	2.36186e+06	3.64437e+06	1.28697e+06	861190	554359	1.06517e+06	2.28535e+06	3.08711e+06	3.35398e+06	37.98	1.66657e+06	1.28015e+06	61.38	1.85	0.89	0.0206682	1.68	0.228643	1.74811	330.238	407.8	6.8	Up
M330T771	M330T771	1.11878e+07	4.7236e+06	9.18492e+06	2.06793e+07	1.11086e+07	4.71545e+06	6.64247e+06	5.48226e+06	807611	483568	4.5575e+06	4.56218e+06	1.51535e+06	9.40392e+06	8.69192e+06	314781	9.21556e+06	7.91369e+06	57.98	3.7921e+06	3.03643e+06	96.54	2.43	1.28	0.014763	1.83	0.200021	1.75123	330.263	771.4	12.9	Up
M330T774	M330T774	6.55514e+06	3.7921e+06	3.99533e+06	5.57055e+06	4.98806e+06	4.85185e+06	4.53277e+06	5.98887e+06	4.82447e+06	7.57388e+06	9.4462e+06	6.5606e+06	1.09613e+07	7.84798e+06	5.10906e+06	4.78749e+06	5.03433e+06	4.91996e+06	19.02	7.13887e+06	7.06724e+06	31.75	0.71	-0.5	0.0498834	1.3	0.330421	1.64368	330.299	774.4	12.9	Down
M331T180	M331T180	1.02231e+07	1.1251e+07	9.37112e+06	1.06279e+07	1.48809e+07	1.31599e+07	1.06554e+07	9.57312e+06	1.22017e+07	8.15723e+06	7.56577e+06	2.19227e+06	1.06896e+07	1.48297e+06	5.42187e+06	5.90951e+06	1.12178e+07	1.06416e+07	16.83	6.70261e+06	6.73764e+06	56.07	1.67	0.74	0.0281274	1.55	0.261699	1.67644	331.014	179.7	3	Up
M331T598	M331T598	1.03905e+06	794413	1.04919e+06	735767	865121	1.16491e+06	1.67299e+06	1.08604e+06	1.20432e+06	1.69595e+06	1.79257e+06	2.31195e+06	1.17229e+06	811407	2.20115e+06	1.44828e+06	1.05093e+06	1.04412e+06	27.88	1.57974e+06	1.57212e+06	32.94	0.67	-0.59	0.014763	1.83	0.200021	1.6604	331.209	598.2	10	Down
M331T724	M331T724	56805.8	76777.9	97777.8	80996	176223	171262	74227.2	27673	152761	254376	508005	271824	131696	66954.2	359138	154567	95217.8	78887	55.25	237415	204472	60.36	0.4	-1.32	0.0379176	1.42	0.297283	1.78679	330.934	723.7	12.1	Down
M332T113	M332T113	412549	549480	652162	167529	171766	132068	529623	658658	243724	107594	106909	57726.9	311065	74458.9	403580	66775.9	409230	471086	54.41	171479	107252	76.4	2.39	1.25	0.014763	1.83	0.200021	1.65817	332.126	113.5	1.9	Up
M332T231	M332T231	1.67901e+06	405593	1.02817e+06	619957	4.06438e+06	211774	388230	562122	4.68208e+06	3.80655e+06	1.02208e+07	751924	2.72655e+06	414771	4.63894e+06	4.87355e+06	1.11991e+06	591039	114.06	4.0144e+06	4.22274e+06	76.14	0.28	-1.84	0.0206682	1.68	0.228643	1.75794	332.287	231.2	3.9	Down
M332T268	M332T268	2.95776e+06	1.75531e+06	7.339e+06	9.20157e+06	8.42189e+06	8.06025e+06	1.0138e+07	3.92072e+06	5.76149e+06	6.17631e+06	1.78258e+06	4.67568e+06	878805	1.74854e+06	1.04841e+06	2.01367e+06	6.47431e+06	7.69962e+06	48.52	3.01069e+06	1.89813e+06	71.95	2.15	1.1	0.0281274	1.55	0.261699	1.67244	332.271	268.4	4.5	Up
M332T35_1	M332T35_1	3.07088e+06	3.4212e+06	4.25441e+06	3.58234e+06	3.45826e+06	3.32337e+06	4.29641e+06	4.74301e+06	1.12685e+07	4.15064e+06	1.2879e+07	1.15605e+07	1.44028e+07	3.47681e+06	3.40934e+06	4.92285e+06	3.76873e+06	3.5203e+06	15.54	8.25881e+06	8.09569e+06	56.69	0.46	-1.13	0.0498834	1.3	0.330421	1.72628	332.274	35.2	0.6	Down
M332T64	M332T64	1.31749e+06	1.42513e+06	1.4101e+06	1.31207e+06	1.16803e+06	1.76774e+06	1.44756e+06	1.40314e+06	3.39854e+06	1.62315e+06	3.37883e+06	3.45647e+06	3.11585e+06	1.39096e+06	1.40467e+06	1.79542e+06	1.40641e+06	1.40662e+06	12.21	2.44548e+06	2.45563e+06	39.54	0.58	-0.8	0.0206682	1.68	0.228643	1.877	332.274	64.3	1.1	Down
M332T749	M332T749	3.19109e+06	3.21096e+06	3.2303e+06	5.3913e+06	8.11916e+06	3.1638e+06	3.39655e+06	3.758e+06	5.65616e+06	4.85343e+06	1.35912e+07	4.36697e+06	5.79095e+06	3.52469e+06	5.41938e+06	6.86367e+06	4.18265e+06	3.31343e+06	42.02	6.25831e+06	5.53777e+06	49.97	0.67	-0.58	0.0281274	1.55	0.261699	1.37863	332.297	749.2	12.5	Down
M332T97	M332T97	1.39577e+06	972408	2.07313e+06	3.0622e+06	1.12406e+06	2.90715e+06	2.21995e+06	2.14468e+06	833874	537342	807178	516592	546772	1.64485e+06	1.00786e+06	1.12891e+06	1.98742e+06	2.10891e+06	39.03	877922	820526	43.72	2.26	1.18	0.004662	2.33	0.129379	2.17408	332.096	97.4	1.6	Up
M333T82_2	M333T82_2	2.05428e+07	1.99981e+07	1.99503e+07	2.39567e+07	1.92781e+07	3.11285e+07	2.14216e+07	2.19707e+07	4.21322e+07	1.92264e+07	4.6987e+07	3.68323e+07	4.11097e+07	2.66701e+07	2.19695e+07	3.00963e+07	2.22808e+07	2.09822e+07	17.35	3.31279e+07	3.34643e+07	30.6	0.67	-0.57	0.0498834	1.3	0.330421	1.75038	332.851	81.8	1.4	Down
M334T125	M334T125	1.30586e+06	779837	841555	1.06012e+06	1.01112e+06	850275	935425	742806	3.92514e+06	2.21776e+06	5.13867e+06	873608	1.85156e+06	1.23904e+06	4.183e+06	4.42941e+06	940874	892850	19.5	2.98227e+06	3.07145e+06	54.4	0.32	-1.66	0.0029526	2.53	0.116769	2.21862	334.04	124.7	2.1	Down
M334T168	M334T168	6.40529e+06	9.47971e+06	7.61367e+06	7.12113e+06	7.5805e+06	8.90586e+06	7.8162e+06	8.3536e+06	2.12126e+06	5.32314e+06	305966	405710	278319	3.68568e+06	3.40599e+06	3.37507e+06	7.9095e+06	7.71493e+06	12.41	2.36264e+06	2.74817e+06	80.13	3.35	1.74	0.0001554	3.81	0.0532196	2.11319	334.042	168.3	2.8	Up
M334T414	M334T414	1.34125e+07	1.95982e+07	1.29074e+07	8.62438e+06	1.09378e+07	1.23511e+07	8.49951e+06	2.56065e+07	118191	1.14144e+07	1.44238e+06	4.74626e+06	532593	1.98511e+06	7.20908e+06	1.05884e+07	1.39922e+07	1.26293e+07	41.75	4.75455e+06	3.36569e+06	94.85	2.94	1.56	0.0029526	2.53	0.116769	1.84172	334.478	414.3	6.9	Up
M334T440	M334T440	51870.4	17703.6	67121.6	51826.8	62369.3	73792.2	88780.2	66439.1	173267	125884	337002	495108	515848	18579.3	72959.9	69474.2	59987.9	64404.2	34.73	226015	149576	87.3	0.27	-1.91	0.0281274	1.55	0.261699	1.47383	334.139	439.6	7.3	Down
M334T489_1	M334T489_1	2.53066e+06	2.20418e+06	2.10047e+06	3.25892e+06	2.99373e+06	2.08893e+06	3.59292e+06	3.61867e+06	2.3433e+06	2.81378e+06	2.37106e+06	2.27831e+06	1.20183e+06	1.92458e+06	1.70727e+06	1.96106e+06	2.79856e+06	2.7622e+06	23.27	2.07515e+06	2.11968e+06	23.61	1.35	0.43	0.0498834	1.3	0.330421	1.66563	333.539	489.4	8.2	Up
M335T100	M335T100	570708	389575	535366	382022	777542	361269	467561	465735	1.18652e+06	965945	1.57433e+06	843709	913832	357692	1.0344e+06	845578	493722	466648	27.66	965251	939888	35.58	0.51	-0.97	0.0104118	1.98	0.169968	2.07942	335.063	100	1.7	Down
M335T561	M335T561	392707	604003	1.5603e+06	515173	2.50018e+06	1.20288e+06	1.12048e+06	1.15174e+06	1.53014e+06	2.64819e+06	3.69491e+06	1.32201e+06	2.7029e+06	2.22643e+06	1.55326e+06	1.84855e+06	1.13093e+06	1.13611e+06	60.4	2.1908e+06	2.03749e+06	36.39	0.52	-0.95	0.0104118	1.98	0.169968	1.84817	335.181	561.5	9.4	Down
M335T767	M335T767	4.40128e+07	3.56021e+07	4.82111e+07	1.33506e+08	8.48964e+07	3.43938e+07	2.67368e+07	2.36995e+07	1.87388e+07	1.10286e+07	3.41466e+07	1.9931e+07	1.18068e+07	3.97928e+07	7.15296e+07	3.53414e+06	5.38823e+07	3.98075e+07	69.42	2.63135e+07	1.93349e+07	83.12	2.05	1.03	0.0379176	1.42	0.297283	1.54772	335.17	766.9	12.8	Up
M336T625	M336T625	9.5263e+06	9.74189e+06	7.92422e+06	1.65048e+07	6.0316e+06	7.91159e+06	5.65062e+06	2.61746e+06	3.08149e+06	1.69129e+06	2.70683e+06	2.42303e+06	2.29259e+06	1.00753e+07	2.0819e+06	3.11391e+06	8.23856e+06	7.9179e+06	49.33	3.43329e+06	2.56493e+06	79.43	2.4	1.26	0.0206682	1.68	0.228643	2.01744	336.122	624.5	10.4	Up
M336T626	M336T626	4.83997e+06	4.83922e+06	7.31791e+06	5.09677e+06	3.63189e+06	7.76808e+06	6.56145e+06	3.70496e+06	2.4693e+06	3.40792e+06	2.45365e+06	4.26806e+06	3.56754e+06	1.85352e+06	4.00416e+06	7.04076e+06	5.47003e+06	4.96837e+06	28.75	3.63312e+06	3.48773e+06	44.28	1.51	0.59	0.0206682	1.68	0.228643	1.64725	336.224	626.4	10.4	Up
M336T79	M336T79	2.97124e+06	2.44673e+06	3.17337e+06	4.85941e+06	3.18333e+06	2.32359e+06	2.61924e+06	2.72807e+06	1.8204e+06	1.42781e+06	2.44961e+06	2.57685e+06	1.86607e+06	2.84917e+06	2.37251e+06	1.22991e+06	3.03812e+06	2.84965e+06	26.37	2.07404e+06	2.11929e+06	27.77	1.46	0.55	0.014763	1.83	0.200021	1.86285	336.013	79	1.3	Up
M336T99	M336T99	834982	1.03053e+06	1.17043e+06	1.33989e+06	1.05686e+06	1.33465e+06	1.25298e+06	1.20707e+06	515257	1.03388e+06	558107	478336	500305	602628	739370	853279	1.15342e+06	1.18875e+06	14.89	660146	580367	30.11	1.75	0.81	0.0010878	2.96	0.0833774	2.42026	336.047	98.6	1.6	Up
M337T531	M337T531	975150	1.0968e+06	773212	540656	773308	431727	1.00068e+06	1.15399e+06	1.30314e+06	999457	1.27432e+06	1.04946e+06	1.32678e+06	1.17862e+06	1.11326e+06	1.31192e+06	843191	874229	30.85	1.19462e+06	1.22647e+06	10.75	0.71	-0.5	0.004662	2.33	0.129379	1.90195	337.129	531	8.8	Down
M339T112	M339T112	342550	401485	308458	379186	408484	442046	421068	441381	312733	318632	284829	276244	319643	293987	276863	336502	393082	404985	12.06	302429	303360	7.44	1.3	0.38	0.0018648	2.73	0.096514	2.40095	339.011	111.9	1.9	Up
M339T114_2	M339T114_2	996658	866871	827064	1.02665e+06	1.05316e+06	899523	825525	948487	595711	1.01476e+06	618276	619514	557433	710560	648715	782538	930493	924005	9.59	693438	634114	21.29	1.34	0.42	0.004662	2.33	0.129379	2.16741	339.08	113.9	1.9	Up
M339T677	M339T677	719938	850756	1.18763e+06	626810	260613	1.11918e+06	723724	708808	663647	537033	223395	812213	626657	145761	59894.5	368546	774683	721831	37.51	429643	452790	63.13	1.8	0.85	0.0206682	1.68	0.228643	1.49696	339.236	676.9	11.3	Up
M340T132	M340T132	563395	394063	563716	433577	559385	392945	402109	439191	843313	695507	1.26237e+06	691803	577388	383376	807457	872984	468548	436384	16.93	766775	751482	33.36	0.61	-0.71	0.0104118	1.98	0.169968	1.99831	339.923	132.1	2.2	Down
M340T358	M340T358	749801	1.42985e+06	720481	1.53163e+06	48781.4	2.59065e+06	980183	874131	980496	29289.1	625731	492804	390191	85284.5	693472	658084	1.11569e+06	927157	67.35	494419	559268	64.62	2.26	1.17	0.0281274	1.55	0.261699	1.07353	340.125	358.5	6	Up
M340T824	M340T824	5.158e+06	4.31539e+06	6.3051e+06	1.3709e+07	4.31722e+06	2.17655e+06	4.19761e+06	4.44774e+06	420601	1.86381e+06	1.82793e+06	5.4504e+06	1.58582e+06	4.60311e+06	4.19922e+06	73888.9	5.57832e+06	4.38248e+06	62.38	2.5031e+06	1.84587e+06	79.78	2.23	1.16	0.0498834	1.3	0.330421	1.54235	340.321	824.1	13.7	Up
M341T351	M341T351	1.89425e+06	1.37608e+06	1.76567e+06	1.43422e+06	1.64802e+06	1.19778e+06	1.6543e+06	1.66661e+06	1.69562e+06	2.58021e+06	1.81053e+06	1.92465e+06	1.73836e+06	2.111e+06	1.43301e+06	1.95581e+06	1.57962e+06	1.65116e+06	14.35	1.90615e+06	1.86759e+06	17.79	0.83	-0.27	0.0281274	1.55	0.261699	1.58993	341.108	351.1	5.9	Down
M341T838	M341T838	8.24299e+06	9.57981e+06	7.31921e+06	8.22484e+06	4.92198e+06	8.7073e+06	7.12285e+06	7.02673e+06	5.73756e+06	3.14357e+06	6.3469e+06	5.38526e+06	2.59197e+06	5.52967e+06	2.60266e+06	3.93883e+06	7.64322e+06	7.77202e+06	18.33	4.40955e+06	4.66205e+06	34.41	1.73	0.79	0.0018648	2.73	0.096514	2.17891	341.305	838.4	14	Up
M342T646	M342T646	2.07032e+06	1.0096e+06	1.17942e+06	1.83174e+06	1.65369e+06	1.19224e+06	1.02449e+06	1.28015e+06	551833	162142	845969	883418	576955	1.73115e+06	1.49074e+06	154279	1.40521e+06	1.23619e+06	28.2	799560	711462	71.51	1.76	0.81	0.0281274	1.55	0.261699	1.61807	342.137	645.8	10.8	Up
M343T280	M343T280	2.85822e+07	2.99043e+07	2.69824e+07	2.74622e+07	2.68283e+07	2.8033e+07	2.65268e+07	2.81926e+07	2.98135e+07	3.10489e+07	3.18012e+07	3.10276e+07	2.94518e+07	3.04147e+07	2.85547e+07	3.04106e+07	2.7814e+07	2.77476e+07	3.98	3.03154e+07	3.04126e+07	3.38	0.92	-0.12	0.0018648	2.73	0.096514	2.30483	343.182	280.1	4.7	Down
M343T436	M343T436	1.04266e+06	967807	1.36002e+06	1.43094e+06	1.65517e+06	1.78913e+06	2.06535e+06	859833	496315	1.33757e+06	142954	378128	557913	637261	612232	1.12617e+06	1.39636e+06	1.39548e+06	30.48	661068	585073	58.95	2.11	1.08	0.004662	2.33	0.129379	1.95223	343.201	435.9	7.3	Up
M343T81_3	M343T81_3	154164	168407	755446	157772	20572	866241	117755	77202.5	2.88518e+06	81111.9	1.59567e+06	1.58939e+06	2.49302e+06	924724	523065	1.26769e+06	289695	155968	112.76	1.41998e+06	1.42854e+06	66.4	0.2	-2.29	0.0104118	1.98	0.169968	1.87117	342.955	81.4	1.4	Down
M344T315	M344T315	2.28842e+06	2.8452e+06	2.79085e+06	699439	1.451e+06	3.19656e+06	2.02976e+06	2.1129e+06	1.41504e+06	552227	335064	403206	448709	569339	1.81617e+06	448667	2.17677e+06	2.20066e+06	37.29	748552	500468	73.6	2.91	1.54	0.0010878	2.96	0.0833774	2.15913	344.188	315.2	5.3	Up
M344T348	M344T348	223556	225692	434339	55405.1	53362.2	176038	76962.2	63440.6	268859	452461	337254	360568	279478	415406	353578	421168	163599	126500	80.79	361096	357073	18.34	0.45	-1.14	0.00699301	2.16	0.14968	2.12563	344.18	347.6	5.8	Down
M344T375	M344T375	247951	469966	260467	410544	670986	645797	217765	414672	260172	88380.6	71316.4	156232	225459	229891	260900	145839	417269	412608	41.75	179774	190845	41.77	2.32	1.21	0.00699301	2.16	0.14968	2.09486	344.182	375.3	6.3	Up
M344T516	M344T516	4.74627e+07	5.94651e+07	4.7478e+07	2.738e+07	8.15952e+07	6.51874e+07	6.94462e+07	2.96143e+07	3.17347e+07	4.6161e+07	3.49402e+07	2.12791e+07	1.15791e+07	1.69895e+07	3.24894e+07	1.74679e+07	5.34536e+07	5.34716e+07	35.65	2.65801e+07	2.65069e+07	43.67	2.01	1.01	0.0104118	1.98	0.169968	1.95713	344.242	516.4	8.6	Up
M344T89	M344T89	1.54292e+06	2.14839e+06	2.13596e+06	1.71354e+06	1.34159e+06	1.97873e+06	1.82576e+06	1.75076e+06	759363	1.4542e+06	962650	1.10174e+06	999999	1.37861e+06	1.10227e+06	1.82412e+06	1.80471e+06	1.78826e+06	15.57	1.19787e+06	1.102e+06	28.15	1.51	0.59	0.004662	2.33	0.129379	2.12759	344.111	89.3	1.5	Up
M345T364	M345T364	699120	585016	749972	769242	689092	633448	849965	788242	524836	809876	419870	327403	260962	485446	464241	555746	720512	724546	11.96	481047	474843	34.4	1.5	0.58	0.00699301	2.16	0.14968	2.01957	345.435	363.9	6.1	Up
M345T538	M345T538	276799	199424	946061	238216	242711	81116.5	258140	156399	293936	1.15074e+06	364985	489481	387593	382867	120227	340746	299858	240464	89.61	441322	373926	69.19	0.68	-0.56	0.0498834	1.3	0.330421	1.04891	345.204	537.9	9	Down
M345T87	M345T87	7.45657e+06	1.25453e+07	7.87309e+06	7.97925e+06	9.89381e+06	1.04037e+07	9.15735e+06	8.98588e+06	4.17956e+06	5.13802e+06	6.03822e+06	5.84978e+06	3.22431e+06	6.20574e+06	5.97256e+06	7.37076e+06	9.28687e+06	9.07162e+06	17.93	5.49737e+06	5.91117e+06	23.5	1.69	0.76	0.0001554	3.81	0.0532196	2.37304	345.077	87	1.4	Up
M345T89	M345T89	6.93493e+06	6.62365e+06	8.37306e+06	5.28973e+06	8.60922e+06	6.04166e+06	7.82359e+06	8.30566e+06	1.20496e+07	8.8801e+06	8.35167e+06	1.41513e+07	9.1493e+06	8.4901e+06	7.11605e+06	6.24985e+06	7.25019e+06	7.37926e+06	16.77	9.30474e+06	8.6851e+06	27.83	0.78	-0.36	0.0498834	1.3	0.330421	1.4415	345.094	89.4	1.5	Down
M347T470	M347T470	560275	435111	373822	484768	351956	490078	426537	467313	311884	345426	154592	273589	344300	475541	460688	251345	448733	451212	14.94	327171	328092	32.49	1.37	0.46	0.014763	1.83	0.200021	1.6474	347.123	469.7	7.8	Up
M347T654	M347T654	650176	319536	2.38435e+06	479302	482418	413335	568011	358891	253447	198060	385326	372139	271724	645178	465264	199080	707003	480860	97.05	348777	321932	43.81	2.03	1.02	0.0498834	1.3	0.330421	1.38497	347.23	653.8	10.9	Up
M347T72	M347T72	637137	510242	827519	700681	295373	578062	593542	488413	505509	260285	468209	416395	466908	674831	182233	490275	578871	585802	27.2	433081	467558	35.17	1.34	0.42	0.0498834	1.3	0.330421	1.2636	346.575	71.6	1.2	Up
M347T88	M347T88	3.47059e+06	2.97649e+06	3.35099e+06	2.91852e+06	1.94999e+06	3.4916e+06	2.72474e+06	2.78423e+06	4.26936e+06	2.71372e+06	4.78306e+06	4.38804e+06	5.16898e+06	3.89489e+06	3.1799e+06	3.26579e+06	2.95839e+06	2.9475e+06	17.16	3.95797e+06	4.08213e+06	21.49	0.75	-0.42	0.0498834	1.3	0.330421	1.76504	347.112	88.3	1.5	Down
M348T146	M348T146	4.72702e+06	6.30971e+06	6.90232e+06	5.51039e+06	8.16425e+06	6.41014e+06	4.603e+06	6.39957e+06	7.84806e+06	7.79102e+06	7.28009e+06	9.20413e+06	5.7895e+06	7.08038e+06	7.76385e+06	6.53018e+06	6.1283e+06	6.35464e+06	19.11	7.4109e+06	7.52197e+06	13.69	0.83	-0.27	0.0379176	1.42	0.297283	1.54215	348.069	145.7	2.4	Down
M348T368	M348T368	2.93455e+06	2.15806e+06	2.71004e+06	2.54503e+06	1.12837e+06	2.69333e+06	3.87523e+06	3.70725e+06	3.73597e+06	3.29173e+06	5.96813e+06	3.02254e+06	5.22876e+06	3.45876e+06	2.79728e+06	2.99133e+06	2.71898e+06	2.70168e+06	31.81	3.81181e+06	3.37524e+06	30.37	0.71	-0.49	0.0379176	1.42	0.297283	1.46616	348.07	368.2	6.1	Down
M348T390	M348T390	777802	3.60522e+06	1.46248e+06	3.52169e+06	1.53525e+06	2.109e+06	3.18781e+06	3.80041e+06	641466	1.47606e+06	1.9432e+06	1.38986e+06	1.25436e+06	1.13406e+06	1.29156e+06	2.05484e+06	2.49996e+06	2.64841e+06	46.74	1.39817e+06	1.34071e+06	32.09	1.79	0.84	0.0379176	1.42	0.297283	1.57741	348.176	389.8	6.5	Up
M348T99_1	M348T99_1	273681	390764	265326	546117	214951	791723	301898	585781	2.46011e+06	288285	1.34281e+06	863870	1.33887e+06	401522	429595	1.29344e+06	421280	346331	47.79	1.05231e+06	1.07866e+06	68.5	0.4	-1.32	0.0281274	1.55	0.261699	1.60226	348.032	99.3	1.7	Down
M349T105	M349T105	103144	286182	328464	354986	436595	324268	409413	413858	399616	358615	416539	604102	392420	464001	402395	463235	332114	341725	31.93	437615	409467	17.38	0.76	-0.4	0.0498834	1.3	0.330421	1.23515	348.992	105.4	1.8	Down
M349T517	M349T517	617983	598477	154573	660386	945514	518330	672078	794249	376576	904378	36532	48145.3	481661	128551	399675	426642	620199	639185	36.97	350270	388126	81.62	1.77	0.82	0.0281274	1.55	0.261699	1.38277	348.721	517.4	8.6	Up
M349T644	M349T644	1.97836e+06	1.87208e+06	770713	1.44958e+06	1.51273e+06	1.49556e+06	1.09385e+06	1.15366e+06	1.7772e+06	1.96551e+06	1.81349e+06	1.53992e+06	1.81479e+06	1.51538e+06	2.0726e+06	2.29583e+06	1.41582e+06	1.47257e+06	28.38	1.84934e+06	1.81414e+06	14.12	0.77	-0.39	0.0281274	1.55	0.261699	1.66908	349.237	643.9	10.7	Down
M350T121	M350T121	3.28781e+07	1.00298e+07	5.36014e+07	2.96309e+07	2.21824e+07	2.40202e+07	2.2789e+07	3.01118e+07	5.98764e+07	5.21568e+06	7.19431e+07	5.90596e+07	4.7769e+07	6.32384e+07	3.9644e+07	6.13762e+07	2.81554e+07	2.68255e+07	44.24	5.10153e+07	5.9468e+07	41.09	0.55	-0.86	0.0206682	1.68	0.228643	1.04948	350.058	121	2	Down
M350T392	M350T392	3.6587e+06	1.18233e+06	4.21548e+06	6.21738e+06	2.57724e+06	3.92312e+06	3.2001e+06	4.74438e+06	1.45574e+06	679868	2.38735e+06	3.73783e+06	2.14639e+06	619330	570096	2.3527e+06	3.71484e+06	3.79091e+06	40.18	1.74366e+06	1.80107e+06	64.23	2.13	1.09	0.0104118	1.98	0.169968	1.80539	350.075	392	6.5	Up
M351T409	M351T409	1.06881e+07	8.16245e+06	7.99308e+06	1.27214e+07	8.97796e+06	7.96769e+06	9.17574e+06	8.9295e+06	7.54995e+06	6.81081e+06	6.29348e+06	7.17082e+06	8.13952e+06	1.03112e+07	6.92719e+06	7.8809e+06	9.32699e+06	8.95373e+06	17.51	7.63549e+06	7.36039e+06	16.18	1.22	0.29	0.0104118	1.98	0.169968	1.6681	351.242	408.8	6.8	Up
M351T677	M351T677	154811	159582	356838	168109	165157	434420	134108	178438	232220	110000	39148.6	202487	79235.9	116232	33316.8	145718	218933	166633	51.04	119795	113116	59.77	1.83	0.87	0.0498834	1.3	0.330421	1.61104	351.275	677	11.3	Up
M352T335	M352T335	553278	434805	527067	618665	688234	312033	537026	493325	755646	858902	793896	538308	573550	515394	611840	676755	520554	532046	21.87	665536	644298	19.02	0.78	-0.35	0.0498834	1.3	0.330421	1.57481	351.698	335.1	5.6	Down
M352T346	M352T346	350551	164428	269489	499248	294601	160023	255531	249952	127433	20740.6	161708	177342	133841	334431	253910	12832.4	280478	262510	38.73	152780	147775	70.81	1.84	0.88	0.0379176	1.42	0.297283	1.49463	352.063	346.2	5.8	Up
M352T565	M352T565	88027.5	332913	181177	55363.6	150101	222573	261499	239728	444369	427485	346256	298080	258665	194242	204377	376618	191423	201875	48.06	318761	322168	30.07	0.6	-0.74	0.0281274	1.55	0.261699	1.62884	352.022	565.1	9.4	Down
M352T575_1	M352T575_1	1.2589e+07	1.5304e+07	1.75606e+07	1.91523e+07	1.25935e+07	1.77789e+07	1.0248e+07	1.44371e+07	1.01558e+07	1.27777e+07	1.06383e+07	1.07468e+07	7.49987e+06	3.37818e+06	9.76449e+06	1.73155e+07	1.49579e+07	1.48705e+07	20.54	1.02846e+07	1.03971e+07	38.85	1.45	0.54	0.0206682	1.68	0.228643	1.60869	351.558	575.3	9.6	Up
M352T661	M352T661	70029.3	304778	85366.1	96196.1	102474	260914	276450	80491.4	296382	382932	328400	135306	339016	116443	188971	369581	159588	99335.2	63.58	269629	312391	39.61	0.59	-0.76	0.0206682	1.68	0.228643	1.46896	352.248	660.6	11	Down
M353T626_3	M353T626_3	1.99389e+06	2.48897e+06	2.64173e+06	2.86257e+06	1.5144e+06	3.92123e+06	2.90505e+06	1.71256e+06	6.52639e+06	1.99827e+06	3.63902e+06	6.42152e+06	4.95423e+06	3.25012e+06	2.19184e+06	3.4759e+06	2.50505e+06	2.56535e+06	30.86	4.05716e+06	3.55746e+06	43.07	0.62	-0.7	0.0498834	1.3	0.330421	1.50074	353.244	626.3	10.4	Down
M353T756	M353T756	1.15335e+07	1.15898e+07	1.27988e+07	1.79591e+07	6.87678e+06	3.47765e+06	6.66558e+06	8.43836e+06	6.8683e+06	7.53135e+06	3.63376e+06	5.67945e+06	6.85989e+06	2.05393e+06	4.559e+06	7.15552e+06	9.91745e+06	9.98594e+06	45.39	5.54265e+06	6.26967e+06	35.34	1.79	0.84	0.0498834	1.3	0.330421	1.54826	353.136	756.3	12.6	Up
M354T261	M354T261	1.79267e+06	835589	2.37905e+06	1.10466e+06	2.5966e+06	300257	367194	501997	2.5347e+06	2.45e+06	3.25737e+06	3.63294e+06	2.1883e+06	463558	2.58835e+06	2.19237e+06	1.23475e+06	970124	73.81	2.41345e+06	2.49235e+06	38.83	0.51	-0.97	0.0498834	1.3	0.330421	1.55166	354.002	261	4.3	Down
M354T348	M354T348	1.39948e+06	876963	1.20887e+06	1.10043e+06	605966	1.12326e+06	806792	812042	759080	312186	735995	776018	668158	611203	506316	703631	991726	988698	26.16	634073	685894	24.77	1.56	0.65	0.004662	2.33	0.129379	1.87284	354.05	347.6	5.8	Up
M355T312	M355T312	754519	505458	877318	687430	621845	580692	663781	659870	1.63198e+06	1.07368e+06	1.84016e+06	1.77134e+06	1.0624e+06	192375	871158	955228	668864	661825	16.76	1.17479e+06	1.06804e+06	47.02	0.57	-0.81	0.014763	1.83	0.200021	1.14081	355.094	311.6	5.2	Down
M355T327	M355T327	1.30434e+06	235032	1.26945e+06	1.80575e+06	1.33661e+06	895961	1.12012e+06	1.00367e+06	651673	72369.9	1.28595e+06	936465	154595	1.12891e+06	819428	38490.5	1.12136e+06	1.19478e+06	40.17	635986	735551	77.4	1.76	0.82	0.0498834	1.3	0.330421	1.33977	355.136	326.9	5.4	Up
M355T756	M355T756	4.37631e+06	3.40801e+06	4.87089e+06	5.27753e+06	1.32347e+06	4.09695e+06	3.62523e+06	2.32109e+06	2.70866e+06	2.09937e+06	1.3842e+06	1.77826e+06	2.60845e+06	1.04997e+06	689981	1.21804e+06	3.66244e+06	3.86109e+06	35.9	1.69212e+06	1.58123e+06	43.44	2.16	1.11	0.00699301	2.16	0.14968	1.9842	355.132	756.3	12.6	Up
M356T408	M356T408	789854	249460	896290	171343	583149	211961	160863	143309	1.03372e+06	1.49507e+06	1.40854e+06	754623	1.49752e+06	168465	1.1149e+06	1.51837e+06	400779	230711	76.92	1.1239e+06	1.26172e+06	42.16	0.36	-1.49	0.0104118	1.98	0.169968	1.9287	356.264	407.8	6.8	Down
M357T119	M357T119	5.04315e+06	1.12315e+06	7.63231e+06	6.97845e+06	5.36976e+06	1.55817e+06	6.22164e+06	8.49326e+06	1.1961e+06	5.92353e+06	1.30674e+06	6.05267e+06	803334	918839	1.02153e+06	4.41042e+06	5.30249e+06	5.7957e+06	50.82	2.70415e+06	1.25142e+06	86.55	1.96	0.97	0.0379176	1.42	0.297283	1.40206	357.022	119	2	Up
M359T105	M359T105	1.37908e+06	1.02682e+06	1.65037e+06	1.21865e+06	1.21151e+06	1.45191e+06	1.33394e+06	1.38807e+06	2.62061e+06	1.96245e+06	3.39244e+06	1.95484e+06	1.93513e+06	1.6908e+06	1.49851e+06	2.83457e+06	1.33254e+06	1.35651e+06	13.94	2.23617e+06	1.95865e+06	28.93	0.6	-0.75	0.0003108	3.51	0.0568482	2.26308	359.155	104.7	1.7	Down
M359T180	M359T180	3.07654e+06	5.13747e+06	4.14982e+06	3.67807e+06	4.25138e+06	1.38933e+07	2.07081e+06	8.50382e+06	1.23729e+07	5.08566e+06	1.1428e+07	1.06011e+07	1.04647e+07	1.73206e+07	1.30572e+07	1.05394e+07	5.59515e+06	4.2006e+06	68.84	1.13587e+07	1.10145e+07	29.92	0.49	-1.02	0.014763	1.83	0.200021	1.96072	359.01	179.5	3	Down
M359T716	M359T716	1.0874e+06	1.6866e+06	1.20108e+06	567795	835400	1.43655e+06	1.85799e+06	1.28596e+06	2.39727e+06	2.43475e+06	1.92404e+06	1.73706e+06	2.10913e+06	987063	1.02536e+06	2.47424e+06	1.24485e+06	1.24352e+06	34.11	1.88611e+06	2.01659e+06	31.88	0.66	-0.6	0.0498834	1.3	0.330421	1.5188	359.253	715.8	11.9	Down
M359T81_1	M359T81_1	1.62991e+07	2.48346e+07	1.77579e+07	9.87964e+06	1.61969e+07	2.61795e+07	2.27974e+07	2.17169e+07	3.4344e+07	3.91125e+07	2.5221e+07	2.52351e+07	3.18884e+07	1.87304e+07	1.92969e+07	4.2593e+07	1.94577e+07	1.97374e+07	27.85	2.95527e+07	2.85618e+07	29.98	0.66	-0.6	0.0206682	1.68	0.228643	1.72928	358.833	81	1.4	Down
M360T781	M360T781	1.60887e+07	1.19871e+07	1.97008e+07	1.96044e+07	1.53601e+07	1.43635e+07	9.38362e+06	1.64806e+07	1.3614e+07	8.44986e+06	6.50145e+06	1.18516e+07	7.83068e+06	7.82485e+06	1.18377e+07	8.03048e+06	1.53711e+07	1.57244e+07	22.9	9.49258e+06	8.24017e+06	26.94	1.62	0.7	0.0018648	2.73	0.096514	2.1035	360.31	781.2	13	Up
M360T815	M360T815	4.67661e+06	7.01067e+06	3.19758e+06	4.22524e+06	3.51773e+06	5.77862e+06	4.71493e+06	3.42286e+06	5.45253e+06	1.78771e+06	3.69285e+06	2.26681e+06	2.81416e+06	2.57147e+06	1.99468e+06	2.95369e+06	4.56803e+06	4.45092e+06	28.51	2.94174e+06	2.69281e+06	40.03	1.55	0.63	0.014763	1.83	0.200021	1.84196	359.636	815.3	13.6	Up
M361T815	M361T815	2.15754e+06	3.98848e+06	3.42606e+06	4.54171e+06	2.33047e+06	3.04944e+06	2.35288e+06	2.11749e+06	2.69409e+06	845483	1.08345e+06	2.13783e+06	2.05861e+06	2.11521e+06	2.23099e+06	2.2559e+06	2995510	2.70116e+06	30.63	1.9277e+06	2.12652e+06	32.62	1.55	0.64	0.014763	1.83	0.200021	1.72833	360.637	815.4	13.6	Up
M361T89	M361T89	1.70198e+06	4.17703e+06	2.28954e+06	2.63405e+06	4.54525e+06	1.53337e+07	1.14177e+07	3.54408e+06	3.26535e+07	1.44916e+07	5.11053e+06	2.16844e+07	3.41153e+07	3.06349e+06	6.9232e+06	2.04405e+07	5.70542e+06	3.86055e+06	86.58	1.73103e+07	1.7466e+07	69.54	0.33	-1.6	0.0206682	1.68	0.228643	1.66956	361.127	89.2	1.5	Down
M362T577	M362T577	367254	343865	511097	310005	523058	256743	464706	234357	1.15918e+06	1.34935e+06	2.10268e+06	612632	1.00863e+06	186136	1.48165e+06	502491	376386	355559	29.7	1.05034e+06	1.08391e+06	58.41	0.36	-1.48	0.0206682	1.68	0.228643	1.8432	362.254	576.7	9.6	Down
M362T661	M362T661	421229	448321	372780	419397	359968	1.17291e+06	423179	776084	543014	440979	897055	822070	1.0049e+06	867632	734862	552709	549234	422204	51.81	732902	778466	27.33	0.75	-0.42	0.0498834	1.3	0.330421	1.30396	362.175	660.8	11	Down
M363T442_1	M363T442_1	1.38275e+06	942919	1.8406e+06	1.96921e+06	2.04804e+06	2.05723e+06	1.69653e+06	1.59816e+06	1.11432e+06	1.2814e+06	899095	898996	1.47139e+06	1.80896e+06	1.67367e+06	1.50083e+06	1.69193e+06	1.76857e+06	22.61	1.33108e+06	1.3764e+06	25.67	1.27	0.35	0.0498834	1.3	0.330421	1.30309	362.985	441.8	7.4	Up
M363T571	M363T571	123199	252026	137339	296613	380650	234347	148937	310041	241015	436117	639978	341906	598717	331138	452004	364812	235394	243186	39.45	425711	400464	32.06	0.55	-0.85	0.00699301	2.16	0.14968	1.8962	363.222	571.1	9.5	Down
M364T351_2	M364T351_2	523491	528383	618236	900801	671246	485418	741329	908576	384622	500416	289213	544293	349705	449105	455695	506091	672185	644741	24.74	434892	452400	20	1.55	0.63	0.0029526	2.53	0.116769	2.13636	364.194	351	5.8	Up
M364T565	M364T565	697390	683966	424628	283219	629414	1.2931e+06	214584	597564	1.8475e+06	1.31648e+06	757493	1.16076e+06	1.12996e+06	497967	952293	2.51521e+06	602983	613489	55.27	1.27221e+06	1.14536e+06	50.4	0.47	-1.08	0.014763	1.83	0.200021	1.83892	364.05	565.1	9.4	Down
M364T89	M364T89	1.59515e+06	3.19664e+06	2.923e+06	2.87709e+06	3.79374e+06	4.28774e+06	1.25779e+06	547793	6.01013e+06	4.2903e+06	4.49721e+06	3.7963e+06	4.71605e+06	3.41224e+06	2.73763e+06	1.13389e+07	2.55987e+06	2.90004e+06	50.76	5.09984e+06	4.39375e+06	52.95	0.5	-0.99	0.0104118	1.98	0.169968	1.69227	364.1	88.9	1.5	Down
M366T619	M366T619	3.78378e+06	1.77967e+06	4.64643e+06	4.02811e+06	3.41409e+06	4.22526e+06	2.22659e+06	3.5319e+06	1.27999e+06	3.98916e+06	1.37202e+06	2.084e+06	2.70625e+06	2.58566e+06	960433	1.85836e+06	3.45448e+06	3.65784e+06	28.47	2104484	1.97118e+06	46.6	1.64	0.72	0.0281274	1.55	0.261699	1.72038	366.294	619.2	10.3	Up
M366T782	M366T782	529428	546482	628947	1.48315e+06	672278	535567	715065	597136	1.29134e+06	2.16623e+06	1.42612e+06	1.20288e+06	616544	1.70322e+06	1.01681e+06	1.9396e+06	713507	613042	44.58	1.42034e+06	1.35873e+06	35.49	0.5	-0.99	0.0104118	1.98	0.169968	2.01685	365.697	782.3	13	Down
M367T114	M367T114	1.10744e+06	1.03064e+06	886418	887541	1.07705e+06	1.00866e+06	837179	890999	754211	498578	872157	879424	915057	785047	831541	688418	965741	949831	10.58	778054	808294	17.35	1.24	0.31	0.004662	2.33	0.129379	1.76937	367.128	114	1.9	Up
M367T657	M367T657	1.01351e+06	1.05989e+06	1.8959e+06	2.0201e+06	579584	989300	948990	576915	326269	844923	717117	1.01274e+06	854316	308115	409992	477321	1.13552e+06	1.00141e+06	47.76	618849	597219	43.92	1.83	0.88	0.0206682	1.68	0.228643	1.70547	367.269	656.5	10.9	Up
M368T328	M368T328	477268	538319	635235	685270	550747	571842	578433	599095	658057	756736	812584	596867	590991	638602	589903	600214	579526	575138	10.86	655494	619408	12.92	0.88	-0.18	0.0498834	1.3	0.330421	1.35131	368.12	328.3	5.5	Down
M368T332	M368T332	3.393e+06	2.99575e+06	2.85819e+06	4.2808e+06	1.44147e+06	3.00262e+06	2.80021e+06	2.87056e+06	1.96611e+06	1.1192e+06	1.45473e+06	2.14361e+06	1.54615e+06	1.5487e+06	1.51549e+06	1.28778e+06	2.95532e+06	2.93315e+06	26.47	1.57272e+06	1.53082e+06	21.31	1.88	0.91	0.004662	2.33	0.129379	2.32024	368.153	331.5	5.5	Up
M368T565	M368T565	283330	634255	351142	113375	109155	535826	553754	514599	716522	1.24155e+06	635617	443910	916787	449335	327215	1.03095e+06	386930	432871	52.74	720236	676070	44.48	0.54	-0.9	0.0498834	1.3	0.330421	1.59542	368.065	565.1	9.4	Down
M368T757	M368T757	4.63088e+06	376908	1.53632e+06	5.41394e+06	3.47772e+06	649273	1.46245e+06	777947	133578	77661.9	240619	555288	108399	2.92626e+06	2.6729e+06	32464.9	2.29068e+06	1.49938e+06	85	843396	187098	144.66	2.72	1.44	0.0281274	1.55	0.261699	1.64885	368.351	757.2	12.6	Up
M368T767	M368T767	2.37034e+06	4.73756e+06	8.09645e+06	3.5917e+06	2.80534e+07	6.10137e+06	4.74993e+06	7.24691e+06	1.51203e+07	9.40419e+06	1.85418e+07	2.51984e+07	1.67467e+07	9.95254e+06	8.95966e+06	6.485e+06	8.11846e+06	5.42565e+06	101.84	1.38011e+07	1.25364e+07	45.32	0.59	-0.77	0.0206682	1.68	0.228643	1.55686	368.279	767	12.8	Down
M368T80	M368T80	6.65959e+06	6.80081e+06	8.02545e+06	5.05935e+06	4.25477e+06	4.69541e+06	6.17162e+06	5.70112e+06	879621	5.64079e+06	2.58734e+06	1.03871e+06	2.93499e+06	3.96519e+06	4.00311e+06	5.13603e+06	5.92101e+06	5.93637e+06	21.06	3.27322e+06	3.45009e+06	53.41	1.81	0.86	0.004662	2.33	0.129379	1.77761	367.963	80.5	1.3	Up
M368T82	M368T82	3.83661e+06	2.60343e+06	3.121e+06	5.17489e+06	3.68413e+06	2.43369e+06	3.00389e+06	2.85802e+06	1.75093e+06	1.18347e+06	2.48362e+06	2.41632e+06	2.27199e+06	3.94616e+06	3.47219e+06	1.06352e+06	3.33946e+06	3.06245e+06	26.52	2.32353e+06	2.34416e+06	43.66	1.44	0.52	0.0498834	1.3	0.330421	1.54312	368.097	82.4	1.4	Up
M369T104	M369T104	1.53206e+06	2.66498e+06	1.79108e+06	2.30406e+06	2.74601e+06	1.75734e+06	2.07345e+06	1.96297e+06	958626	1.65449e+06	1.98885e+06	1.47367e+06	692674	1.40622e+06	1.46548e+06	1.93449e+06	2.104e+06	2.01821e+06	20.74	1.44681e+06	1.46958e+06	30.74	1.45	0.54	0.0104118	1.98	0.169968	1.81819	369.095	104.3	1.7	Up
M369T369	M369T369	110293	95896.9	126953	95477.8	179941	71929.2	110554	114555	241285	222080	382171	192738	195798	66254.1	206713	203372	113200	110423	27.89	213801	205043	40.26	0.53	-0.92	0.0104118	1.98	0.169968	1.83695	369.103	368.9	6.1	Down
M369T767	M369T767	668470	637348	789925	1.97572e+06	1.29875e+06	591575	473287	415379	283530	178791	467962	260499	232188	445717	908668	57306.8	856307	652909	61.6	354333	272015	73.62	2.42	1.27	0.0104118	1.98	0.169968	1.84136	369.225	766.9	12.8	Up
M369T802	M369T802	7.53085e+06	3.44839e+06	7.54805e+06	7.70215e+06	7.26784e+06	6.3306e+06	6.94187e+06	6.80711e+06	6.61802e+06	5.67196e+06	7.02467e+06	6.915e+06	3.28915e+06	3.41671e+06	5.88719e+06	5.03693e+06	6.69711e+06	7.10486e+06	20.75	5.48245e+06	5.77958e+06	26.87	1.22	0.29	0.0379176	1.42	0.297283	1.08792	369.31	802	13.4	Up
M369T82_2	M369T82_2	2.87096e+06	3.5032e+06	3.01544e+06	3.66769e+06	3.51439e+06	2.79727e+06	4.23975e+06	3.80563e+06	2.392e+06	3.03573e+06	1.98124e+06	1.80614e+06	400400	3.77502e+06	2.5396e+06	2.7148e+06	3.42679e+06	3.50879e+06	14.59	2.33062e+06	2.4658e+06	42.6	1.47	0.56	0.014763	1.83	0.200021	1.46636	368.891	81.6	1.4	Up
M369T839_1	M369T839_1	2.66399e+06	3.23019e+06	2.42674e+06	3.05325e+06	1.89496e+06	4.6665e+06	2.31439e+06	2.45127e+06	2.16166e+06	2.19671e+06	1.70454e+06	1.91787e+06	2.35727e+06	1.83765e+06	1.86462e+06	2.39941e+06	2.83766e+06	2.55763e+06	29.95	2.05497e+06	2.03977e+06	12.56	1.38	0.47	0.00699301	2.16	0.14968	1.78924	369.181	838.7	14	Up
M369T88	M369T88	1.31535e+06	5.5747e+06	6.6653e+06	5.40291e+06	824011	5.68457e+06	5.63745e+06	6.25421e+06	485840	787779	723010	5.04328e+06	3.57196e+06	1.4391e+06	3.10316e+06	5.12792e+06	4.66981e+06	5.60607e+06	48.47	2.53526e+06	2.27113e+06	76.24	1.84	0.88	0.0206682	1.68	0.228643	1.26408	369.044	87.9	1.5	Up
M371T115	M371T115	412421	347212	414396	471067	702592	545158	401997	387708	699467	1.01236e+06	1.0785e+06	454881	494092	517018	585024	435854	460319	413409	24.89	659650	551021	38.3	0.7	-0.52	0.0379176	1.42	0.297283	1.48497	370.973	114.6	1.9	Down
M371T280	M371T280	3.59313e+06	3.91781e+06	3.7162e+06	4.16178e+06	2.22656e+06	3.82849e+06	3.25665e+06	3.13787e+06	560677	1.83133e+06	308899	814278	562871	2.26503e+06	1.76546e+06	1.96914e+06	3.47981e+06	3.65466e+06	17.46	1.25971e+06	1.28987e+06	61.29	2.76	1.47	0.0003108	3.51	0.0568482	2.25275	371.05	280.3	4.7	Up
M371T700	M371T700	283680	110479	145652	436697	274137	76998.1	163040	118792	22013.7	10158.2	81977.9	104741	19081.4	199398	119431	3983.38	201184	154346	60.17	70098.1	51995.8	98.5	2.87	1.52	0.0206682	1.68	0.228643	1.82579	371.299	700.3	11.7	Up
M371T72	M371T72	1.638e+06	1.93833e+06	1.67313e+06	1.62372e+06	1.62402e+06	2.04999e+06	1.70318e+06	1.70444e+06	2.0045e+06	2.22463e+06	1.86237e+06	1.74281e+06	2.04214e+06	1.75971e+06	1.80309e+06	2.28429e+06	1.74435e+06	1.68815e+06	9.19	1.96544e+06	1.93344e+06	10.62	0.89	-0.17	0.0206682	1.68	0.228643	1.60589	370.888	71.7	1.2	Down
M372T66	M372T66	1.51933e+06	1.6185e+06	1.60785e+06	1.68917e+06	1.52258e+06	1.71464e+06	1.65157e+06	1.63067e+06	1.91121e+06	1.70945e+06	1.7001e+06	1.87803e+06	2.11073e+06	1.71969e+06	1.54166e+06	2.07711e+06	1.61929e+06	1.62459e+06	4.34	1.831e+06	1.79886e+06	10.83	0.88	-0.18	0.0104118	1.98	0.169968	1.7582	372.099	66.5	1.1	Down
M372T790	M372T790	1.48411e+06	2.27e+06	1.40849e+06	1.29152e+06	1.05357e+06	626084	1.11429e+06	1.15153e+06	525577	1.15366e+06	548409	1.10358e+06	668989	453771	811772	808628	1.29995e+06	1.22152e+06	36.29	759298	738809	34.48	1.71	0.78	0.014763	1.83	0.200021	1.83218	372.33	790	13.2	Up
M373T106	M373T106	800432	470349	1.27009e+06	683606	1.03519e+06	562050	507486	432129	1.07277e+06	1.28676e+06	1.49746e+06	888177	789601	804186	809208	1.00242e+06	720166	622828	41.49	1.01882e+06	945297	25.26	0.71	-0.5	0.0379176	1.42	0.297283	1.64349	373.073	106.4	1.8	Down
M373T117	M373T117	350264	325337	497372	240900	348797	116159	403949	456289	581753	500647	1.04022e+06	616617	527148	201299	443129	439726	342383	349530	35.37	543817	513898	43.6	0.63	-0.67	0.0281274	1.55	0.261699	1.39987	373.058	117	2	Down
M373T655	M373T655	1.28959e+06	1.93734e+06	2.3689e+06	778221	1.22594e+06	1.36394e+06	1.39331e+06	1.05475e+06	895605	1.20816e+06	902088	891058	881995	859514	726958	780364	1.4265e+06	1.32676e+06	35.27	893217	886526	15.88	1.6	0.68	0.0104118	1.98	0.169968	1.88662	373.178	655.4	10.9	Up
M374T124	M374T124	7.66159e+06	6.83024e+06	7.77648e+06	7.58012e+06	6.08071e+06	7.6364e+06	6.55289e+06	7.4949e+06	5.19071e+06	7.66064e+06	5.29815e+06	6.30407e+06	751012	7.48369e+06	5.58277e+06	7.34717e+06	7.20167e+06	7.53751e+06	8.74	5.70228e+06	5.94342e+06	39.23	1.26	0.34	0.0498834	1.3	0.330421	1.07024	374.057	123.5	2.1	Up
M374T427	M374T427	922875	457038	414869	1.3562e+06	570585	522172	588363	558833	178868	198777	146535	350530	360186	847321	716347	110084	673867	564709	46.79	363581	274654	75.77	1.85	0.89	0.0379176	1.42	0.297283	1.70115	374.263	427	7.1	Up
M374T813_2	M374T813_2	2.1928e+06	3.50965e+06	1.25715e+06	1.95571e+06	2.08753e+06	3.30284e+06	2.49379e+06	2.33437e+06	1.64787e+06	816989	1.61811e+06	1.8596e+06	1.11948e+06	1.74907e+06	1.54651e+06	3.09701e+06	2.39173e+06	2.26359e+06	30.41	1.68183e+06	1.63299e+06	39.74	1.42	0.51	0.0281274	1.55	0.261699	1.47937	374.135	812.6	13.5	Up
M375T319	M375T319	661774	673328	577199	660975	593833	621686	715968	614620	566214	598384	476992	464770	644780	614309	462253	141913	639923	641331	7.2	496202	521603	32.26	1.29	0.37	0.0104118	1.98	0.169968	1.32648	374.509	318.9	5.3	Up
M376T369	M376T369	631689	419990	172130	591376	969672	105530	683033	661841	1.26924e+06	1.4713e+06	2.27171e+06	963579	1.00129e+06	146448	1.15257e+06	1.00644e+06	529408	611533	53.83	1.16032e+06	1.07951e+06	51.08	0.46	-1.13	0.0104118	1.98	0.169968	1.39754	376.233	368.8	6.1	Down
M376T387	M376T387	1.80255e+06	2.45469e+06	2.62689e+06	2.79624e+06	1.62122e+06	2.52746e+06	2.69307e+06	2.99513e+06	695843	1.79929e+06	1.25832e+06	1.68722e+06	1.33133e+06	2.18234e+06	1.62397e+06	2.22779e+06	2.43966e+06	2.57717e+06	19.71	1.60076e+06	1.6556e+06	31.57	1.52	0.61	0.00699301	2.16	0.14968	1.87846	376.185	387	6.4	Up
M376T416_2	M376T416_2	823269	3.02145e+06	801476	562805	1.76491e+06	1.89552e+06	2.73704e+06	2.73471e+06	204945	310644	1.17518e+06	816345	348455	167450	127808	279367	1.79265e+06	1.83021e+06	54.72	428775	295005	86.33	4.18	2.06	0.0029526	2.53	0.116769	2.26677	376.268	416.2	6.9	Up
M376T771	M376T771	3.40182e+06	1.83738e+06	2.77769e+06	4.482e+06	4.90734e+06	1.79142e+06	2.92485e+06	2.29984e+06	1.2325e+06	823840	1.59046e+06	1.78436e+06	1.30693e+06	3.99564e+06	3.57298e+06	677527	3.05279e+06	2.85127e+06	37.82	1.87303e+06	1.44869e+06	66.14	1.63	0.7	0.0379176	1.42	0.297283	1.55712	376.217	771	12.8	Up
M376T795_1	M376T795_1	3.88833e+07	1.73165e+07	1.55666e+07	1.6743e+07	2.07008e+07	1.78242e+07	1.89118e+07	2.42941e+07	1.64435e+07	1.11503e+07	8.58998e+06	1.73756e+07	1.76537e+07	1.53814e+07	1.00591e+07	1.41116e+07	2.128e+07	1.8368e+07	35.78	1.38457e+07	1.47465e+07	25.22	1.54	0.62	0.00699301	2.16	0.14968	1.75205	376.246	795.1	13.3	Up
M376T813	M376T813	4.39459e+06	5.99411e+06	6.21817e+06	8.62329e+06	5.37447e+06	6.84794e+06	4.25403e+06	4.8365e+06	3.39976e+06	3.08736e+06	4.7373e+06	6.62718e+06	2.4416e+06	5.9027e+06	4.22043e+06	3.7812e+06	5.81789e+06	5.68429e+06	24.95	4.27469e+06	4.00081e+06	33.3	1.36	0.44	0.0379176	1.42	0.297283	1.61435	376.258	813.3	13.6	Up
M376T824	M376T824	5.15649e+06	7.05476e+06	9.85691e+06	5.71823e+06	8.91238e+06	9.37912e+06	7.56457e+06	9.23116e+06	1.0633e+07	1.25325e+07	9.39579e+06	6.79595e+06	1.10857e+07	1.01122e+07	1.02367e+07	6.9438e+06	7.8592e+06	8.23847e+06	22.51	9.71696e+06	1.01744e+07	20.36	0.81	-0.31	0.0498834	1.3	0.330421	1.31614	376.314	824.4	13.7	Down
M376T86	M376T86	1.39348e+07	3.60352e+06	5.29252e+06	5.66467e+06	3.85865e+06	6.98018e+06	4.57309e+06	4.64002e+06	8.89057e+06	6.35948e+06	8.30571e+06	1.14065e+07	8.578e+06	7.74349e+06	1.23046e+07	7.04129e+06	6.06843e+06	4.96627e+06	55.26	8.82871e+06	8.44185e+06	23.27	0.69	-0.54	0.014763	1.83	0.200021	1.77615	376.064	85.7	1.4	Down
M377T369	M377T369	170744	381635	114641	123441	327619	569581	215188	296309	212199	87529.2	268487	80786.2	155615	124120	86321.5	115562	274895	255749	55.77	141328	119841	47.8	1.95	0.96	0.0379176	1.42	0.297283	1.64115	377.236	368.7	6.1	Up
M377T387	M377T387	167611	127661	155892	140520	228718	147565	183691	145653	416777	333569	518099	349567	286181	148935	353385	294200	162164	151729	19.65	337589	341568	31.54	0.48	-1.06	0.0018648	2.73	0.096514	2.3475	376.687	386.7	6.4	Down
M377T72	M377T72	539330	508549	469009	477106	520141	533124	536518	540750	615814	558215	574729	703608	514287	564874	446672	577495	515566	526633	5.52	569462	569802	13.02	0.91	-0.14	0.0498834	1.3	0.330421	1.2943	376.88	71.6	1.2	Down
M378T72	M378T72	3.76317e+06	4.79474e+06	4.35816e+06	4.73105e+06	3.57806e+06	4.4895e+06	4.13147e+06	3.9054e+06	3.85502e+06	3.1651e+06	4.70761e+06	3.44085e+06	3.79245e+06	3.4383e+06	3.35444e+06	4.06638e+06	4.21895e+06	4.24482e+06	10.64	3.72752e+06	3.61665e+06	13.29	1.13	0.18	0.0498834	1.3	0.330421	1.53468	377.927	71.8	1.2	Up
M379T367	M379T367	948551	1.11304e+06	382084	377204	123962	463999	735186	368031	120172	136199	551179	141418	134052	177560	257266	114088	564007	423042	59.51	203992	138808	72.38	2.76	1.47	0.0206682	1.68	0.228643	1.89549	379.132	366.5	6.1	Up
M380T114	M380T114	558558	966902	749917	951520	1.14348e+06	968940	1.31056e+06	914059	695191	1.09365e+06	535797	581806	510778	739938	606249	650205	945492	959211	24.07	676701	628227	27.38	1.4	0.48	0.0281274	1.55	0.261699	1.788	380.075	113.9	1.9	Up
M380T285	M380T285	2.12991e+06	2.21994e+06	2.28283e+06	2.0324e+06	2.23944e+06	2.56205e+06	2.20142e+06	2.24567e+06	2.36141e+06	2.50484e+06	2.76263e+06	2.51571e+06	2.30037e+06	2.62267e+06	2.60664e+06	2.16711e+06	2.23921e+06	2229691	6.81	2.48017e+06	2.51027e+06	7.81	0.9	-0.15	0.0206682	1.68	0.228643	1.75561	380.111	285.1	4.8	Down
M380T356	M380T356	1.39076e+06	763106	428438	892367	871472	1.07283e+06	961475	1.2136e+06	721608	1.98031e+06	2.44777e+06	1.88407e+06	1.02802e+06	2.39943e+06	1.40632e+06	2.51187e+06	949256	926921	30.72	1.79742e+06	1.93219e+06	37.85	0.53	-0.92	0.0206682	1.68	0.228643	1.83734	379.611	355.7	5.9	Down
M380T755	M380T755	1.07768e+07	3.59985e+06	5.99153e+06	1.28387e+07	8.67603e+06	2.05888e+06	5.61894e+06	3.9125e+06	742253	596387	2.38911e+06	3.15117e+06	960169	8.3731e+06	6.41105e+06	412802	6.68415e+06	5.80523e+06	56.21	2.87951e+06	1.67464e+06	103.78	2.32	1.21	0.0379176	1.42	0.297283	1.70755	380.162	755	12.6	Up
M380T768	M380T768	5.86685e+06	1.87978e+06	2.57752e+06	6.73365e+06	6.13736e+06	2.28783e+06	8.88554e+06	6.63358e+06	1.69675e+06	1.88566e+06	3.27959e+06	1.80324e+06	1.39215e+06	2.72888e+06	6.1592e+06	395525	5.12526e+06	6.0021e+06	49.83	2.41763e+06	1.84445e+06	71.91	2.12	1.08	0.0379176	1.42	0.297283	1.60803	380.264	768.3	12.8	Up
M380T789	M380T789	1.69039e+06	2.46388e+06	1.08461e+06	1.99268e+06	2.03421e+06	2.42402e+06	2.25267e+06	2.04285e+06	1.63698e+06	1.5767e+06	533712	1.03187e+06	2.11451e+06	482513	1.02659e+06	2.20195e+06	1.99816e+06	2.03853e+06	22.35	1.3256e+06	1.30428e+06	49.91	1.51	0.59	0.0379176	1.42	0.297283	1.54472	380.278	788.9	13.1	Up
M381T773	M381T773	2.38093e+06	1.25427e+06	1.73535e+06	1.08899e+06	1.51516e+06	1.07286e+06	1.96431e+06	1.0385e+06	685708	524570	1.23329e+06	783141	736858	1.45197e+06	1.02344e+06	161978	1.5063e+06	1.38472e+06	32.44	825120	760000	49.29	1.83	0.87	0.00699301	2.16	0.14968	1.68832	381.31	772.7	12.9	Up
M382T280_2	M382T280_2	8.40208e+06	8.96649e+06	9.87865e+06	9.00404e+06	8.38446e+06	8.92932e+06	9.52511e+06	9.31054e+06	8.61932e+06	6.86566e+06	9.48063e+06	7.05647e+06	8.6297e+06	8.13153e+06	7.5295e+06	5.61431e+06	9.05009e+06	8.98526e+06	5.71	7.74089e+06	7.83052e+06	15.85	1.17	0.23	0.0206682	1.68	0.228643	1.74175	382.157	279.9	4.7	Up
M382T323	M382T323	391031	753916	520678	462438	429651	125767	522044	511937	352311	158029	415378	359526	123898	374182	119690	479951	464683	487188	37.61	297871	355919	47.67	1.56	0.64	0.0206682	1.68	0.228643	1.27397	382.186	323.4	5.4	Up
M382T374	M382T374	481934	559111	466905	279035	574760	306539	297632	356764	405797	1.48479e+06	935620	617217	678877	645814	731231	868431	415335	411834	28.9	795972	705054	40.4	0.52	-0.94	0.0018648	2.73	0.096514	2.12164	382.161	374.4	6.2	Down
M382T536	M382T536	297668	293176	283339	429702	552858	118690	455535	361128	68011.3	62625.5	100451	335924	271680	374117	122898	81673.4	349012	329398	37.93	177172	111674	72.63	1.97	0.98	0.0281274	1.55	0.261699	1.74566	382.19	536.2	8.9	Up
M382T776	M382T776	539465	392085	394989	328709	777863	335156	357961	461412	544609	827658	1.60027e+06	565353	504589	669248	310452	874358	448455	393537	33.54	737067	617301	53.28	0.61	-0.72	0.0498834	1.3	0.330421	1.49479	382.273	776.4	12.9	Down
M383T280	M383T280	4.47861e+06	4.76387e+06	4.52249e+06	4.62817e+06	4.35346e+06	6.45899e+06	4.61345e+06	4.73035e+06	3.19996e+06	4.65818e+06	2.92474e+06	2.83996e+06	3.27175e+06	3.53933e+06	3.3093e+06	3.679e+06	4.81867e+06	4.62081e+06	14.03	3.42778e+06	3.29052e+06	16.64	1.41	0.49	0.0029526	2.53	0.116769	2.35348	383.15	279.9	4.7	Up
M383T776	M383T776	736546	823203	869143	951850	864263	808879	612902	339751	550371	794687	418031	582123	538568	514967	712086	510880	750817	816041	25.87	577714	544470	20.83	1.3	0.38	0.0281274	1.55	0.261699	1.23694	383.203	775.5	12.9	Up
M383T99	M383T99	1.14611e+07	1.9762e+07	1.82363e+07	1.6961e+07	1.35147e+07	1.94306e+07	1.7404e+07	1.36315e+07	1.79866e+07	1.25647e+07	1.12691e+07	1.45981e+07	1.52154e+07	9.58863e+06	7.79426e+06	1.17328e+07	1.63002e+07	1.71825e+07	18.76	1.25937e+07	1.21488e+07	25.91	1.29	0.37	0.0498834	1.3	0.330421	1.61265	383.012	99	1.6	Up
M384T105	M384T105	283536	430296	354916	416844	350026	405419	304514	433153	271787	323671	217520	360507	282496	316063	268809	272977	372338	380168	15.53	289229	277737	14.99	1.29	0.36	0.0104118	1.98	0.169968	1.98932	384.108	104.5	1.7	Up
M384T106	M384T106	894695	448896	946075	594513	1.14763e+06	342319	553920	567961	1.32092e+06	923754	1.99621e+06	917781	766517	614582	1.24734e+06	918827	687002	581237	40.37	1.08824e+06	921291	39.85	0.63	-0.66	0.0379176	1.42	0.297283	1.65688	384.089	106.2	1.8	Down
M384T136	M384T136	39489.3	19943.5	33446.3	35836.8	60260	19915.1	20638.4	30288.1	94638.9	64333.8	159421	79429.9	59599.2	20348.9	53700.7	73901.8	32477.2	31867.2	41.85	75671.8	69117.8	53.15	0.43	-1.22	0.0104118	1.98	0.169968	1.90802	383.95	136.3	2.3	Down
M384T378	M384T378	7941.44	2056.55	4670.39	27804.8	37367.7	2533.65	5283.9	10302	65438.7	204370	13245.6	123214	138905	13014.1	8563.43	44468	12245	6612.67	106.9	76402.4	54953.4	94.15	0.16	-2.64	0.00699301	2.16	0.14968	1.87292	384.221	378.1	6.3	Down
M384T565_1	M384T565_1	191520	142176	245772	343848	324330	136687	221733	192746	59238.5	34045.8	123164	157768	107105	197985	193650	28761	224852	207239	34.14	112715	115135	60.07	1.99	1	0.0206682	1.68	0.228643	1.82379	384.015	565.1	9.4	Up
M384T565_2	M384T565_2	349713	322956	448967	236231	382778	218304	144327	336719	1.00139e+06	587748	499463	555338	789903	120283	796380	518315	304999	329838	32.35	608603	571543	43.21	0.5	-1	0.0104118	1.98	0.169968	1.59588	384.038	565.1	9.4	Down
M385T412	M385T412	59481.1	223963	151942	233887	325670	170420	259586	259509	579837	564151	554230	233211	306361	259093	374012	419639	210557	228925	38.77	411317	396826	34.33	0.51	-0.97	0.0104118	1.98	0.169968	1.81293	385.342	411.5	6.9	Down
M385T819	M385T819	2.70256e+07	1.61422e+07	1.8102e+07	3.66953e+07	2.44656e+07	1.96643e+07	1.78786e+07	2.00783e+07	8.77489e+06	9.32991e+06	1.5364e+07	1.74643e+07	1.32268e+07	2.25866e+07	1.86154e+07	6.40387e+06	2.25065e+07	1.98713e+07	30.08	1.39707e+07	1.42954e+07	39.79	1.61	0.69	0.014763	1.83	0.200021	1.81128	385.272	819.4	13.7	Up
M386T148	M386T148	1.40862e+06	753182	2.66555e+06	1.57543e+06	1.18967e+06	1.01635e+06	2.01489e+06	1.97528e+06	3.10621e+06	2.55137e+06	5.03269e+06	3.13395e+06	3.39281e+06	1.26981e+06	2.37964e+06	2.56647e+06	1.57487e+06	1.49203e+06	39.48	2.92912e+06	2.83634e+06	36.59	0.54	-0.9	0.0104118	1.98	0.169968	1.89875	386.015	147.9	2.5	Down
M386T839	M386T839	1.71068e+06	2.24386e+06	1.94233e+06	2.48647e+06	1.29197e+06	2.39594e+06	1.43898e+06	1.51423e+06	995543	1.51589e+06	1.37643e+06	1.59999e+06	1.4915e+06	533491	1.16936e+06	1.47773e+06	1.87806e+06	1.82651e+06	24.43	1.26999e+06	1.42708e+06	28.25	1.48	0.56	0.0281274	1.55	0.261699	1.73221	386.209	838.7	14	Up
M387T117	M387T117	436758	376256	246157	270838	17034.8	603318	298582	334641	144754	60289.9	127854	152411	233972	135098	64285.7	134148	322948	316611	51.99	131602	134623	41.36	2.45	1.3	0.0104118	1.98	0.169968	1.17503	387.197	117.3	2	Up
M387T743	M387T743	9.42192e+06	1.06661e+07	4.25031e+06	4.24502e+06	3.73516e+06	1.39698e+07	6.5849e+06	1.04166e+07	1.2524e+07	1.49769e+07	1.20888e+07	1.05182e+07	2.01302e+07	8.11523e+06	5.69167e+06	1.85762e+07	7.91122e+06	8.00341e+06	47.51	1.28276e+07	1.23064e+07	38.43	0.62	-0.7	0.0498834	1.3	0.330421	1.52879	387.293	743.2	12.4	Down
M387T807	M387T807	2.4275e+06	3.08435e+06	2.26144e+06	3.37119e+06	1.14416e+06	3.48082e+06	2.09044e+06	2.45648e+06	1.353e+06	2.27736e+06	1.57259e+06	1.40383e+06	1.13991e+06	1.34958e+06	2.03378e+06	1.88543e+06	2.53955e+06	2.44199e+06	30.21	1.62693e+06	1.48821e+06	24.34	1.56	0.64	0.014763	1.83	0.200021	1.78897	387.33	806.8	13.4	Up
M387T82_2	M387T82_2	3.06358e+06	1.89092e+06	2.10125e+06	2.4028e+06	3.68183e+06	2.06464e+06	4.05374e+06	2.15543e+06	1.71361e+06	1.69403e+06	1.67688e+06	1.72901e+06	909746	2.65966e+06	3.61932e+06	1.72616e+06	2.67677e+06	2.27912e+06	30.7	1.96605e+06	1.71988e+06	41.52	1.36	0.45	0.0281274	1.55	0.261699	1.34045	387.005	82.3	1.4	Up
M388T347_2	M388T347_2	5.74695e+06	3.72557e+06	1.94371e+06	4.27206e+06	1.5041e+07	3.23849e+06	3.68216e+06	4.16955e+06	121686	4.25129e+06	3.10763e+06	222311	379580	76277.7	2.05106e+06	2.53048e+06	5.22744e+06	3.94756e+06	78.54	1.59254e+06	1.21532e+06	101.43	3.28	1.71	0.0104118	1.98	0.169968	1.85712	388.081	347.1	5.8	Up
M388T526	M388T526	621359	2.30978e+06	707346	2.64659e+06	8.52444e+06	5.58476e+06	1.01581e+07	1.1652e+07	328696	494533	2.16556e+06	1.07083e+06	172593	542114	123204	412538	5.27555e+06	4.11568e+06	82.74	663758	453535	101.44	7.95	2.99	0.0018648	2.73	0.096514	2.18278	388.267	526.2	8.8	Up
M389T194_2	M389T194_2	3.31625e+06	3.40304e+06	2.20951e+06	2.60286e+06	3.12962e+06	3.43279e+06	2.85259e+06	4.20176e+06	5.98309e+06	4.1526e+06	2.98691e+06	1.08849e+07	6.41584e+06	2.97632e+06	6.88658e+06	4.98832e+06	3.14355e+06	3.22293e+06	19.2	5.65932e+06	5.48571e+06	45.57	0.56	-0.85	0.0281274	1.55	0.261699	1.87437	389.109	193.6	3.2	Down
M389T558	M389T558	3.42534e+06	1.34276e+06	2.11466e+06	5.10492e+06	4.13448e+06	1.36974e+06	1.81143e+06	2.0636e+06	772261	800471	1.20394e+06	1.03038e+06	925830	1.6525e+06	2.0503e+06	403453	2.67087e+06	2.08913e+06	52.01	1.10489e+06	978107	47.6	2.42	1.27	0.0029526	2.53	0.116769	2.00901	389.272	558.5	9.3	Up
M390T443_3	M390T443_3	396418	68505.1	305554	220722	435315	230573	37558.1	68877.8	610396	568928	796865	716111	546677	77925.2	582421	630311	220440	225648	69.43	566204	596409	37.81	0.39	-1.36	0.0029526	2.53	0.116769	1.7302	390.259	443.5	7.4	Down
M391T778	M391T778	3.11126e+06	4.64053e+06	2.48025e+06	2.75871e+06	2.8844e+06	2.40264e+06	1.75028e+06	2.99401e+06	1.90853e+06	1.93863e+06	2.29665e+06	1.44463e+06	1.90963e+06	1.67595e+06	3.23361e+06	2.36696e+06	2.87776e+06	2.82156e+06	28.91	2.09682e+06	1.92413e+06	26.14	1.37	0.46	0.0379176	1.42	0.297283	1.56146	391.207	777.8	13	Up
M391T82	M391T82	2.51976e+06	1.60118e+06	3.22083e+06	2.83161e+06	3.23836e+06	1.62154e+06	1.63729e+06	1.66758e+06	4.47793e+06	3.80771e+06	6.29489e+06	3.52764e+06	2.78263e+06	3.42012e+06	3.70125e+06	3.27064e+06	2.29227e+06	2.09367e+06	32.34	3.91035e+06	3.61445e+06	27.56	0.59	-0.77	0.0010878	2.96	0.0833774	2.12649	390.831	81.8	1.4	Down
M392T256	M392T256	1.20492e+06	2.26554e+06	1.83424e+06	1.42454e+06	1.51613e+06	1.42112e+06	2.44026e+06	2.22831e+06	2.00149e+06	2.44289e+06	3.18141e+06	1.36907e+06	2.9308e+06	2.53678e+06	2.20368e+06	3.19278e+06	1.79188e+06	1.67518e+06	26.09	2.48236e+06	2.48983e+06	25.24	0.72	-0.47	0.0498834	1.3	0.330421	1.5542	392.111	256.2	4.3	Down
M392T422	M392T422	227394	165472	263942	220998	164259	212561	146756	140859	247115	265693	222456	262404	240003	167048	214089	258306	192780	189017	23.05	234639	243559	14.06	0.82	-0.28	0.0498834	1.3	0.330421	1.50356	392.181	421.6	7	Down
M392T85	M392T85	1.83063e+06	1.86097e+06	2.23679e+06	2.08881e+06	1.60051e+06	1.79364e+06	1.52166e+06	1.68235e+06	3.14726e+06	1.36361e+06	3.56223e+06	2.66705e+06	2.75857e+06	2.15255e+06	1.86359e+06	2.55084e+06	1.82692e+06	1.81213e+06	13.15	2.50821e+06	2.60895e+06	28.04	0.73	-0.46	0.0281274	1.55	0.261699	1.58717	392.053	84.6	1.4	Down
M393T795_1	M393T795_1	1.03628e+09	1.19332e+09	9.93786e+08	1.58174e+09	3.50006e+08	1.81475e+09	1.03152e+09	1.00471e+09	8.01035e+08	8.0077e+08	8.34424e+08	7.84386e+08	3.81725e+08	2.99331e+08	6.31465e+08	9.54033e+08	1.12576e+09	1.0339e+09	38.83	6.85896e+08	7.92578e+08	33.75	1.64	0.71	0.00699301	2.16	0.14968	1.47317	393.284	795	13.2	Up
M394T343_1	M394T343_1	2.99409e+07	2.77355e+07	2.8267e+07	3.91521e+07	4.18017e+07	2.33959e+07	2.15723e+07	3.05042e+07	3.76239e+07	4.15793e+07	6.77443e+07	3.9997e+07	3.04063e+07	3.74957e+07	3.16017e+07	4.16796e+07	3.02962e+07	2.91039e+07	23.18	4.1016e+07	3.88104e+07	28.27	0.74	-0.44	0.0379176	1.42	0.297283	1.61221	394.126	342.8	5.7	Down
M396T380_1	M396T380_1	1.71209e+07	2.15056e+07	1.84279e+07	3.33201e+07	1.91411e+07	1.66088e+07	2.65637e+07	3.11946e+07	1.5312e+07	2.07923e+07	1.34904e+07	5.54335e+06	2.76694e+06	3.36908e+06	2.40304e+07	7.03274e+06	2.29853e+07	2.03234e+07	28.47	1.15421e+07	1.02615e+07	70.21	1.99	0.99	0.014763	1.83	0.200021	1.87085	395.706	380.3	6.3	Up
M396T389	M396T389	320883	204046	348956	230060	335081	207595	234758	197516	655753	363325	623590	419707	499472	232213	503535	370666	259862	232409	24.59	458533	459589	30.77	0.57	-0.82	0.0018648	2.73	0.096514	2.1353	396.175	389	6.5	Down
M396T78	M396T78	334256	322452	354759	334355	346160	311484	317730	332272	1.14656e+06	329868	978804	1.10237e+06	1.05894e+06	374360	335816	348834	331683	333264	4.33	709443	676582	55.01	0.47	-1.1	0.0104118	1.98	0.169968	1.77172	396.042	77.9	1.3	Down
M396T800	M396T800	2.6044e+07	2.11279e+07	3.72732e+07	3.45607e+07	1.9045e+07	2.73211e+07	2.37277e+07	1.99225e+07	2.51522e+07	1.5917e+07	1.73041e+07	2.94245e+07	9.87042e+06	1.0612e+07	2.00893e+07	1.27616e+07	2.61277e+07	2.48858e+07	25.72	1.76414e+07	1.66106e+07	39.39	1.48	0.57	0.0379176	1.42	0.297283	1.71721	396.314	800.1	13.3	Up
M396T813	M396T813	2.76601e+06	1.28888e+06	1.60151e+06	3.68477e+06	2.74228e+06	1.26523e+06	1.55475e+06	1.52145e+06	197331	191123	283754	1.11518e+06	380732	1.86582e+06	2.45745e+06	111019	2.05311e+06	1.57813e+06	43.51	825302	332243	108.65	2.49	1.31	0.0206682	1.68	0.228643	1.92703	396.274	812.8	13.5	Up
M398T385	M398T385	150998	383235	371609	64310.8	304559	339266	288641	302877	604856	284296	1.08836e+06	809954	626826	683128	399957	994773	275687	303718	40.39	686519	654977	39.92	0.4	-1.32	0.004662	2.33	0.129379	2.03916	398.02	385	6.4	Down
M398T807_1	M398T807_1	1.34513e+07	1.66876e+07	1.26126e+07	3.83158e+07	2.83715e+07	1.5799e+07	1.58652e+07	1.31383e+07	7.98773e+06	6.72685e+06	1.29971e+07	9.35461e+06	7.25279e+06	2.13121e+07	1.69377e+07	5.06118e+06	1.92802e+07	1.58321e+07	47.68	1.09538e+07	8.67117e+06	51.75	1.76	0.82	0.0498834	1.3	0.330421	1.76065	398.314	806.9	13.4	Up
M398T85	M398T85	4.72416e+07	5.12385e+07	4.50047e+07	5.3408e+07	4.7867e+07	5.01966e+07	5.07086e+07	5.20584e+07	4.50019e+07	5.04182e+07	4.437e+07	4.8718e+07	4.17472e+07	4.69482e+07	5.0147e+07	4.652e+07	4.97154e+07	5.04526e+07	5.61	4.67338e+07	4.67341e+07	6.4	1.06	0.09	0.0379176	1.42	0.297283	1.48644	398.034	84.6	1.4	Up
M398T86	M398T86	3.15082e+06	2.82343e+06	3.2518e+06	3.37484e+06	4.04803e+06	3.50334e+06	3.60438e+06	3.21412e+06	4.01836e+06	4.03547e+06	5.67759e+06	3.38482e+06	3.08817e+06	4.53015e+06	3.91375e+06	4.46803e+06	3.37135e+06	3.31332e+06	10.74	4.13954e+06	4.02691e+06	19.1	0.81	-0.3	0.0498834	1.3	0.330421	1.64612	398.048	86.2	1.4	Down
M399T481_1	M399T481_1	1.36472e+07	1.25951e+07	1.68891e+07	1.30185e+07	9.98679e+06	1.45559e+07	4.48625e+06	1.5693e+07	1.09616e+07	4.0281e+06	4.72997e+06	1.85159e+06	1.18536e+07	6.87687e+06	1.23035e+07	1.24151e+07	12608981	1.33328e+07	30.82	8.12754e+06	8.91923e+06	52.42	1.55	0.63	0.0206682	1.68	0.228643	1.31075	398.597	480.6	8	Up
M399T481_2	M399T481_2	916164	2.27039e+06	1.67523e+06	2.36962e+06	835779	2.3784e+06	2.13503e+06	2.08137e+06	832177	1.64879e+06	957752	801314	708963	793040	1.95096e+06	832077	1.83275e+06	2.1082e+06	34.44	1.06563e+06	832127	43.67	1.72	0.78	0.00699301	2.16	0.14968	1.78399	398.929	480.6	8	Up
M399T703	M399T703	533970	802591	240143	842807	415102	891559	401024	474656	410150	468596	315791	386335	198041	179675	345399	643927	575231	504313	41.73	368489	365867	40.51	1.56	0.64	0.0498834	1.3	0.330421	1.43223	399.324	703.1	11.7	Up
M399T763	M399T763	7.15447e+06	7.04422e+06	6.60095e+06	6.42703e+06	6.53685e+06	6.03072e+06	6.75883e+06	6.22695e+06	3.96488e+06	3.61073e+06	2.98802e+06	5.48334e+06	5.51029e+06	6.91966e+06	3.54869e+06	3.1899e+06	6.5975e+06	6.5689e+06	5.81	4.40194e+06	3.7878e+06	31.84	1.5	0.58	0.004662	2.33	0.129379	2.1667	399.252	763.1	12.7	Up
M400T108	M400T108	644683	518278	739722	627933	272288	543445	527453	528165	510037	329748	414460	444299	350336	429297	423850	417402	550246	535805	24.78	414929	420626	13.4	1.33	0.41	0.0104118	1.98	0.169968	1.49084	399.504	108.4	1.8	Up
M400T179	M400T179	7.84515e+06	6.00792e+06	8.18021e+06	8.79936e+06	9.40595e+06	9.33065e+06	9.4488e+06	1.03594e+07	6.13462e+06	8.46239e+06	6.16008e+06	5.55561e+06	4.22711e+06	5.91921e+06	5.80212e+06	6.27564e+06	8.67217e+06	9.06501e+06	15.39	6.0671e+06	6.02692e+06	19.24	1.43	0.52	0.004662	2.33	0.129379	2.18883	400.157	179.1	3	Up
M400T643	M400T643	1.19795e+06	1.96974e+06	1.09775e+06	1.95073e+06	1.15659e+06	1.91213e+06	1.5626e+06	1.32282e+06	1.35127e+06	1.0826e+06	1.06599e+06	902767	701731	1.65386e+06	803498	1.53186e+06	1.52129e+06	1.44271e+06	24.8	1.1367e+06	1.07429e+06	30.34	1.34	0.42	0.0498834	1.3	0.330421	1.56243	400.269	642.9	10.7	Up
M400T698	M400T698	431528	308529	247438	107087	381910	687060	569689	526239	550449	1.06472e+06	573783	620847	936426	347263	559780	631133	407435	406719	45.96	660550	597315	34.8	0.62	-0.7	0.0379176	1.42	0.297283	1.60376	400.305	698.3	11.6	Down
M401T312	M401T312	727516	619533	729913	866758	917386	666366	557870	774672	549364	821568	563927	498542	527144	514004	416508	604286	732502	728715	16.45	561918	538254	21.06	1.3	0.38	0.0104118	1.98	0.169968	1.86313	401.066	312.2	5.2	Up
M401T726	M401T726	537404	240989	549658	364426	634556	359995	545794	479925	401265	236854	132682	325416	128672	317726	341046	130630	464093	508664	28.12	251786	277290	43.59	1.84	0.88	0.004662	2.33	0.129379	1.90414	401.336	725.5	12.1	Up
M401T82_1	M401T82_1	3.73261e+06	4.996e+06	5.72726e+06	6.18732e+06	4.73144e+06	5.50525e+06	5.89777e+06	5.63412e+06	1.79464e+06	4.36537e+06	2.10605e+06	1.39416e+06	1.17354e+06	4.65484e+06	4.81063e+06	4.57858e+06	5.30147e+06	5.56968e+06	14.88	3.10973e+06	3.23571e+06	52.2	1.7	0.77	0.0029526	2.53	0.116769	1.88376	400.797	82.1	1.4	Up
M401T82_3	M401T82_3	1.1789e+06	1.48211e+06	1.79933e+06	2.05111e+06	3.66581e+06	1.44299e+06	1.57488e+06	1.67492e+06	2.61769e+06	4.84372e+06	4.07404e+06	2.0047e+06	2.04366e+06	1.65471e+06	2.13675e+06	2.33476e+06	1.85876e+06	1.6249e+06	41.66	2.71375e+06	2.23576e+06	41.66	0.68	-0.55	0.0281274	1.55	0.261699	1.39623	400.852	81.8	1.4	Down
M402T667	M402T667	1.24096e+06	607689	1.3376e+06	295301	2.98193e+06	286628	1.02154e+06	1.43815e+06	7.15423e+06	2.86854e+06	7.73838e+06	2.85887e+06	4.85663e+06	580494	2.78005e+06	2.99236e+06	1.15122e+06	1.13125e+06	75.36	3.97869e+06	2.93045e+06	61.15	0.29	-1.79	0.014763	1.83	0.200021	1.95089	402.23	666.9	11.1	Down
M403T667	M403T667	430539	186149	231974	133020	504699	129078	450472	445565	2.57526e+06	1.07183e+06	3.84889e+06	610138	1.9217e+06	299736	634640	1.2322e+06	313937	331256	50.49	1.5243e+06	1.15202e+06	78.74	0.21	-2.28	0.0018648	2.73	0.096514	2.17514	403.233	666.7	11.1	Down
M405T146	M405T146	4.97582e+07	8.7969e+07	5.18448e+07	5.82654e+07	9.44606e+07	9.97018e+07	8.85144e+07	8.64303e+07	5.42017e+07	5.19963e+07	5.86441e+07	4.59659e+07	6.15692e+07	4.69275e+07	4.57003e+07	5.40869e+07	7.71181e+07	8.71997e+07	26.34	5.23865e+07	5.30416e+07	11.31	1.47	0.56	0.0379176	1.42	0.297283	2.0036	405.125	145.6	2.4	Up
M405T716	M405T716	38109.1	64029.9	29944.9	29007.7	48501.1	98058.6	85288.9	76957.9	103460	200980	103633	50130.4	103549	66718.3	69128.2	153024	58737.2	56265.5	44.83	106328	103504	46.72	0.55	-0.86	0.0206682	1.68	0.228643	1.66073	405.314	715.9	11.9	Down
M406T137	M406T137	242105	127077	272334	76861.7	228701	86290	117663	163782	343274	326281	621003	284716	213037	119053	365082	461888	164352	145429	45.51	341792	334778	44.59	0.48	-1.06	0.0104118	1.98	0.169968	1.90636	406.061	136.8	2.3	Down
M406T146	M406T146	8.49288e+06	1.62743e+07	7.73002e+06	9.67494e+06	1.58005e+07	1.30805e+07	2.05811e+07	1.29712e+07	8.10839e+06	4.85885e+06	1.1516e+07	1.0406e+07	7.36652e+06	3.94311e+06	4.12008e+06	6.60043e+06	1.30757e+07	1.30258e+07	33.6	7.11493e+06	6.98347e+06	39.62	1.84	0.88	0.00699301	2.16	0.14968	2.01887	406.128	145.5	2.4	Up
M406T332	M406T332	845534	381372	570623	865095	984413	922252	420468	420292	534295	487454	368493	360850	360502	326364	325907	788425	676256	708078	37.44	444036	364672	35.71	1.52	0.61	0.0206682	1.68	0.228643	1.50091	406.108	331.8	5.5	Up
M406T422_1	M406T422_1	70382.6	67559.2	84309.2	18671.2	171568	45633	131032	63285.9	961199	498757	1.21624e+06	1.3351e+06	813577	29862.7	126808	82618	81555.2	68970.9	59.45	633020	656167	82.61	0.13	-2.96	0.0379176	1.42	0.297283	1.81897	405.777	421.6	7	Down
M407T110	M407T110	1.14779e+06	940717	1.13405e+06	1.85765e+06	1.28013e+06	1.10535e+06	1.58979e+06	1.63707e+06	310296	1.09059e+06	1.63093e+06	430824	361500	812472	784366	509263	1.33657e+06	1.21396e+06	23.93	741280	646814	60.34	1.8	0.85	0.00699301	2.16	0.14968	1.96881	407.145	109.5	1.8	Up
M407T325	M407T325	320765	333258	384683	328464	316203	223703	273827	286872	322904	416110	374538	421526	367390	362791	402351	398589	308472	318484	15.44	383275	386563	8.56	0.8	-0.31	0.004662	2.33	0.129379	2.02854	406.71	325.5	5.4	Down
M407T355	M407T355	271726	1.25849e+06	645987	634074	1.29836e+06	1.90651e+06	1.13444e+06	940879	307549	280725	448363	351095	639839	504374	250989	359074	1.01131e+06	1.03766e+06	49.97	392751	355085	33.25	2.57	1.36	0.0104118	1.98	0.169968	2.10668	406.555	354.5	5.9	Up
M407T82_2	M407T82_2	690995	384641	732898	394569	840911	567641	404285	413931	1.98328e+06	1.21943e+06	2.60751e+06	1.16589e+06	1.43404e+06	160213	1.46214e+06	1.33061e+06	553734	490786	32.69	1.42039e+06	1.38233e+06	49.28	0.39	-1.36	0.0104118	1.98	0.169968	1.65525	406.846	81.6	1.4	Down
M408T292	M408T292	4.69499e+06	5.0769e+06	5.06027e+06	936436	4.50881e+06	5.5974e+06	4.15574e+06	4.5344e+06	8.48765e+06	8.29277e+06	6.72883e+06	6.29386e+06	9.17096e+06	7.84755e+06	6.94138e+06	9.56904e+06	4.32062e+06	4.61469e+06	33.25	7.9165e+06	8.07016e+06	14.92	0.55	-0.87	0.0001554	3.81	0.0532196	2.01978	408.103	291.5	4.9	Down
M408T382_2	M408T382_2	367852	310752	500578	499180	255448	391356	397729	287356	444185	449468	551402	637485	569764	516974	393015	484726	376281	379604	24.21	505877	500850	15.63	0.74	-0.43	0.014763	1.83	0.200021	1.83242	408.186	382.4	6.4	Down
M408T89_2	M408T89_2	7.49004e+06	9.19408e+06	9.76712e+06	1.27906e+07	9.55455e+06	1.21907e+07	1.36186e+07	1.34618e+07	4.80081e+06	7.25678e+06	4.2164e+06	3.49432e+06	5.43522e+06	4.94088e+06	4.83953e+06	7.29825e+06	1.10084e+07	1.09789e+07	20.81	5.28527e+06	4.89021e+06	25.65	2.08	1.06	0.0001554	3.81	0.0532196	2.57793	408.105	88.9	1.5	Up
M409T742	M409T742	5.94959e+06	7.55874e+06	7.08986e+06	1.09468e+07	4.59749e+06	1.1236e+07	7.23175e+06	7.56809e+06	6.76341e+06	6.97307e+06	5.59281e+06	4.35984e+06	5.48639e+06	2.19334e+06	4.24521e+06	7.35469e+06	7.77229e+06	7.39524e+06	29.31	5.37109e+06	5.5396e+06	32.16	1.45	0.53	0.0206682	1.68	0.228643	1.5697	409.166	742	12.4	Up
M410T114	M410T114	841165	1.12936e+06	908449	866297	971948	1.10695e+06	1.25757e+06	1.25272e+06	99673.2	326340	586928	1.29811e+06	112347	541991	604363	1.02096e+06	1.04181e+06	1.03945e+06	16.09	573839	564459	72.92	1.82	0.86	0.0379176	1.42	0.297283	1.73791	409.946	114.4	1.9	Up
M412T114_1	M412T114_1	1.80519e+06	2.50589e+06	2.11043e+06	2.09687e+06	1.25531e+06	1.97804e+06	2.4139e+06	2.43313e+06	270146	784109	259128	372378	195303	1.10731e+06	1.24198e+06	1.01697e+06	2.07484e+06	2.10365e+06	19.83	655916	578244	65.52	3.16	1.66	0.0001554	3.81	0.0532196	2.34974	411.945	114.3	1.9	Up
M412T81_2	M412T81_2	2.6889e+06	2.65632e+06	3.03007e+06	3.24054e+06	2.76466e+06	3.19974e+06	2.72416e+06	2.52158e+06	632338	2.31814e+06	2.155e+06	2.37461e+06	2.42285e+06	2.54923e+06	2.61151e+06	2.50892e+06	2.85325e+06	2.74441e+06	9.38	2.19658e+06	2.39873e+06	29.51	1.3	0.38	0.000621601	3.21	0.069967	1.35467	412.002	81	1.4	Up
M413T392_5	M413T392_5	1.25032e+06	1.07939e+06	1.53022e+06	1.50629e+06	1.33654e+06	1.10186e+06	1.14775e+06	1.07559e+06	2.27995e+06	2.62585e+06	3.17181e+06	1.39687e+06	1.57187e+06	1.36586e+06	1.73566e+06	1.00301e+06	1.2535e+06	1.19904e+06	14.88	1.89386e+06	1.65377e+06	38.73	0.66	-0.6	0.0379176	1.42	0.297283	1.62557	413.152	391.8	6.5	Down
M414T392_2	M414T392_2	1.16714e+06	1.48152e+06	957169	940793	558066	646717	1.27834e+06	1.23178e+06	1.89385e+06	1.26952e+06	2.33846e+06	1.13952e+06	1.57539e+06	945486	1.56498e+06	1.96787e+06	1.03269e+06	1.06216e+06	30.79	1.58688e+06	1.57018e+06	29.34	0.65	-0.62	0.0281274	1.55	0.261699	1.74402	414.147	391.9	6.5	Down
M415T392	M415T392	76624.4	128556	74880.5	98402.9	55802.1	69646.7	102480	100438	189582	37273.6	186983	127521	171590	119887	138545	176613	88353.9	87513.6	26.34	143499	155068	35.36	0.62	-0.7	0.0206682	1.68	0.228643	1.35827	415.045	391.9	6.5	Down
M415T648	M415T648	555774	186483	220933	524849	578392	162211	250474	256839	103559	34981.5	153300	169510	90409.2	313740	477182	48148.1	341994	253656	52.05	173854	128430	86.69	1.97	0.98	0.0281274	1.55	0.261699	1.59827	415.224	647.9	10.8	Up
M415T775_1	M415T775_1	5.85071e+07	4.22374e+07	4.34547e+07	5.40362e+07	8.20974e+07	8.53389e+07	3.70172e+07	8.2232e+07	3.38093e+07	4.73855e+07	4.16876e+07	7.49143e+07	4.1543e+07	5.21013e+07	3.35576e+07	2.8153e+07	6.06151e+07	5.62717e+07	32.86	4.4144e+07	4.16153e+07	33.25	1.37	0.46	0.0498834	1.3	0.330421	1.38137	415.323	774.7	12.9	Up
M416T458	M416T458	144664	49012.1	186294	221964	220648	198059	282412	273239	113137	183651	70997.4	17046.8	53187.7	89314.5	182940	34872	197036	209354	37.9	93143.2	80156	67.83	2.12	1.08	0.0104118	1.98	0.169968	1.6608	416.262	457.8	7.6	Up
M416T794_1	M416T794_1	2.37337e+07	4.91419e+07	3.49748e+07	5.15614e+07	1.66904e+07	2.44009e+07	3.87619e+07	3.54682e+07	1.94709e+07	2.1467e+07	2.08537e+07	1.85841e+07	1.91722e+07	2.24616e+07	1.79964e+07	2.89053e+07	3.43417e+07	3.52215e+07	35.83	2.11139e+07	2.01623e+07	16.53	1.63	0.7	0.0206682	1.68	0.228643	1.89962	416.325	794	13.2	Up
M417T391	M417T391	366230	573617	661513	609239	352952	568743	490406	601111	220895	536666	276075	234743	473115	285576	200351	585421	527976	571180	21.68	351605	280826	43.98	1.5	0.59	0.0206682	1.68	0.228643	1.75959	416.543	391.4	6.5	Up
M418T189	M418T189	1.41939e+06	1.43765e+06	1.47251e+06	1.0777e+06	1.20837e+06	1.11984e+06	1.07195e+06	1.28452e+06	1.58625e+06	1.60767e+06	1.45941e+06	1.8729e+06	1.56353e+06	1.32979e+06	1.3283e+06	1.60611e+06	1.26149e+06	1.24645e+06	13.18	1.54424e+06	1.57489e+06	11.42	0.82	-0.29	0.00699301	2.16	0.14968	2.0135	418.319	188.9	3.1	Down
M418T526	M418T526	297541	673234	450492	1.47164e+06	3.05632e+06	4.29391e+06	1.70459e+06	1.70775e+06	209650	263525	542043	704275	118548	254268	163305	319458	1.70693e+06	1.58812e+06	80.46	321884	258897	62.33	5.3	2.41	0.004662	2.33	0.129379	2.19662	418.162	526.4	8.8	Up
M418T91	M418T91	2.54886e+06	3.06159e+06	2.58918e+06	2.66214e+06	2.68232e+06	2.65145e+06	2.65011e+06	2.61462e+06	3.2028e+06	2.675e+06	2.72309e+06	2.99901e+06	2.78576e+06	3.02115e+06	2.95143e+06	3.03874e+06	2.68253e+06	2.65078e+06	5.93	2.92462e+06	2.97522e+06	6.17	0.92	-0.12	0.0104118	1.98	0.169968	1.78206	418.11	91.3	1.5	Down
M420T307	M420T307	1.79034e+06	1.77706e+06	1.13873e+06	1.6162e+06	2.71963e+06	1.00929e+06	1.4241e+06	1.52418e+06	1.79279e+06	4.5692e+06	3.52162e+06	1.86941e+06	1.45457e+06	1.89989e+06	2.42328e+06	1.53599e+06	1.62494e+06	1.57019e+06	32.19	2.38334e+06	1.88465e+06	46.24	0.68	-0.55	0.0498834	1.3	0.330421	1.36072	420.104	306.6	5.1	Down
M420T392_1	M420T392_1	2.48781e+06	2.12186e+06	2.70816e+06	2.80752e+06	2.18454e+06	2.4285e+06	2.77306e+06	1.20385e+06	82079.4	1.79472e+06	627449	293120	315088	1.17195e+06	1.15866e+06	1.80747e+06	2.33941e+06	2.45816e+06	22.47	906317	893053	74.81	2.58	1.37	0.000621601	3.21	0.069967	1.94681	419.546	392	6.5	Up
M420T80	M420T80	5.96845e+06	4.20261e+06	5.5189e+06	5.59944e+06	3.93527e+06	4.28428e+06	4.35242e+06	4.30682e+06	371022	4.86725e+06	518478	338134	292917	3.22464e+06	4.32864e+06	3.97328e+06	4.77102e+06	4.32962e+06	16.48	2.23929e+06	1.87156e+06	91.06	2.13	1.09	0.0206682	1.68	0.228643	1.79897	419.975	79.6	1.3	Up
M421T307	M421T307	275712	204396	136460	185590	446909	124260	146414	222907	296200	756185	480959	246499	210307	221099	351136	284255	217831	194993	48.32	355830	290228	51.59	0.61	-0.71	0.0281274	1.55	0.261699	1.55656	421.109	306.7	5.1	Down
M421T461	M421T461	62489.9	140061	89543.1	39082.5	52824.3	161204	126250	115755	221646	355511	141870	117008	206788	94909.2	102635	363698	98401.2	102649	44.99	200508	174329	54.07	0.49	-1.03	0.0379176	1.42	0.297283	1.70956	420.702	461.1	7.7	Down
M421T795_1	M421T795_1	2.77143e+06	3.19579e+06	3.07963e+06	3.14289e+06	2.89029e+06	6.78868e+06	3.65311e+06	5.46902e+06	1.80392e+06	2.14235e+06	2.19614e+06	2.86732e+06	1.85782e+06	1.97851e+06	1.65101e+06	2.51134e+06	3.87386e+06	3.16934e+06	37.66	2.12605e+06	2.06043e+06	18.87	1.82	0.87	0.0003108	3.51	0.0568482	2.26545	421.289	795.1	13.3	Up
M421T795_3	M421T795_3	5.35154e+08	6.69159e+08	4.25839e+08	6.1749e+08	5.36308e+08	6.96308e+08	7.68773e+08	3.42703e+08	5.05443e+08	4.92678e+08	1.89184e+08	2.51384e+08	5.67451e+08	4.0254e+08	3.68214e+08	3.71978e+08	5.73967e+08	5.76899e+08	24.83	3.93609e+08	3.87259e+08	32.67	1.46	0.54	0.0281274	1.55	0.261699	1.62372	421.321	795.2	13.3	Up
M422T354	M422T354	1.52583e+06	2.03837e+06	1.96665e+06	1.76774e+06	2.54753e+06	1.81695e+06	2.10161e+06	5.4122e+06	3.92644e+06	2.04322e+06	6.45268e+06	3.80982e+06	5.18939e+06	6.55975e+06	4.22199e+06	6.82783e+06	2.39711e+06	2.00251e+06	52.31	4.87889e+06	4.70569e+06	34.4	0.49	-1.03	0.00699301	2.16	0.14968	2.04009	422.158	354.5	5.9	Down
M422T604	M422T604	531108	372076	659303	321149	762261	102333	387627	497911	1.03228e+06	454024	1.67293e+06	440589	872269	375046	1.02138e+06	1.25734e+06	454221	442769	45.39	890733	946823	50.97	0.51	-0.97	0.0498834	1.3	0.330421	1.59406	422.255	604.2	10.1	Down
M423T137	M423T137	26604.2	26215.7	29034	24355	48732.9	26893	35290.6	32825.9	96638.6	80495.6	115992	64685.2	73769.3	22648.7	59723.9	65259.1	31243.9	27963.5	25.46	72401.6	69514.2	38.01	0.43	-1.21	0.0104118	1.98	0.169968	2.17941	422.951	136.6	2.3	Down
M424T345	M424T345	298052	557269	323459	314300	300579	576980	445284	538767	21447.2	371880	33774.8	21134.7	10347.7	188809	191524	316368	419336	384371	29.6	144411	111292	100.02	2.9	1.54	0.00699301	2.16	0.14968	1.98194	424.173	345	5.8	Up
M425T122	M425T122	4.94001e+06	4.73431e+06	4.42769e+06	3.31947e+06	5.05366e+06	4.30941e+06	4.54487e+06	4.53272e+06	6.55264e+06	7.56985e+06	5.99449e+06	8.91614e+06	7.04643e+06	4.55464e+06	6.27957e+06	5.54635e+06	4.48277e+06	4.53879e+06	11.9	6.55752e+06	6.41611e+06	20.18	0.68	-0.55	0.0010878	2.96	0.0833774	2.27692	425.103	122	2	Down
M425T335	M425T335	2.10753e+06	2.58256e+06	1.59595e+06	2.17531e+06	2.86607e+06	2.46592e+06	2.23431e+06	2.28384e+06	2.40506e+06	4.53899e+06	3.51114e+06	1.7815e+06	2.64409e+06	2.63286e+06	2.93334e+06	2.74747e+06	2.28894e+06	2.25907e+06	16.34	2.89931e+06	2.69578e+06	28.31	0.79	-0.34	0.0498834	1.3	0.330421	1.32021	425.115	335	5.6	Down
M425T392_1	M425T392_1	9.40701e+06	1.49045e+07	1.62328e+07	1.29714e+07	5.49085e+06	2.68371e+07	9.70035e+06	9.10086e+06	9.52193e+06	4.14849e+06	7.59054e+06	6.14338e+06	6.38304e+06	7.96563e+06	5.94242e+06	1.29339e+07	1.30806e+07	1.13359e+07	50.12	7.57867e+06	6.98679e+06	35.45	1.73	0.79	0.0379176	1.42	0.297283	1.62656	424.54	391.9	6.5	Up
M426T350_1	M426T350_1	801055	665039	908699	862585	281653	843493	829406	702507	770274	329372	481939	726224	391520	445428	331009	93095.5	736805	815230	27.29	446108	418474	49.35	1.65	0.72	0.0281274	1.55	0.261699	1.52549	425.568	350.5	5.8	Up
M426T350_2	M426T350_2	638638	699604	779822	862432	354097	1.41475e+06	626054	536550	31780.3	195824	19148.1	48440.6	33904	184970	675803	956357	738993	669121	42.39	268278	116705	131.63	2.75	1.46	0.0281274	1.55	0.261699	1.96919	425.903	350.5	5.8	Up
M426T815	M426T815	1.55326e+07	1.64075e+07	1.27902e+07	1.73257e+07	7.89318e+06	1.57053e+07	1.87584e+07	1.52129e+07	2.51414e+07	1.87402e+07	3.23505e+07	1.61884e+07	1.71406e+07	9.63915e+06	2.10628e+07	3.64976e+07	1.49532e+07	1.5619e+07	22.28	2.20951e+07	1.99015e+07	40.07	0.68	-0.56	0.0498834	1.3	0.330421	1.34161	426.344	814.8	13.6	Down
M427T718	M427T718	2.07725e+06	2.85201e+06	3.32845e+06	3.26777e+06	2.29229e+06	1.9843e+06	1.94369e+06	1.94218e+06	2.36397e+06	1.35996e+06	2.10494e+06	1.63739e+06	1.82374e+06	1.75841e+06	1.06029e+06	1.79794e+06	2.46099e+06	2.18477e+06	24.26	1.73833e+06	1.77817e+06	23.32	1.42	0.5	0.014763	1.83	0.200021	1.84854	427.424	717.6	12	Up
M427T737	M427T737	1.0382e+06	1.44259e+06	945464	305274	404425	1.56551e+06	1.84071e+06	2.25498e+06	3.10235e+06	3.29135e+06	1.78408e+06	2.02311e+06	3.12827e+06	1.27642e+06	1.4184e+06	2.94722e+06	1.22465e+06	1.2404e+06	55.52	2.3714e+06	2.48516e+06	35.13	0.52	-0.95	0.0281274	1.55	0.261699	1.77185	427.424	736.6	12.3	Down
M427T741_2	M427T741_2	947912	1.45765e+06	1.22541e+06	1.11761e+06	685584	1.36492e+06	1.37195e+06	1.40082e+06	786158	1.10302e+06	1.2318e+06	775066	449228	1.10805e+06	198441	951230	1.19648e+06	1.29517e+06	22.31	825374	868694	42.88	1.45	0.54	0.0379176	1.42	0.297283	1.44856	427.351	741.1	12.4	Up
M427T79	M427T79	6.22278e+06	6.70158e+06	5.78598e+06	6.45087e+06	6.42251e+06	6.79306e+06	5.79111e+06	6.25845e+06	6.07765e+06	6.19673e+06	5.74223e+06	1.86387e+06	5.63769e+06	5.0897e+06	5.86322e+06	6.21557e+06	6.30329e+06	6.34048e+06	5.91	5.33583e+06	5.80273e+06	27.17	1.18	0.24	0.0104118	1.98	0.169968	1.0927	426.992	78.8	1.3	Up
M427T81_2	M427T81_2	9.11658e+06	7.84264e+06	8.85826e+06	1.1037e+07	8.9594e+06	1.02209e+07	1.00062e+07	1.14209e+07	3.71187e+06	6.29003e+06	5.00873e+06	4.16999e+06	3.20166e+06	1.05234e+07	5.71707e+06	6.31572e+06	9.68272e+06	9.56138e+06	12.44	5.61731e+06	5.3629e+06	40.9	1.72	0.79	0.004662	2.33	0.129379	2.25135	426.833	81	1.4	Up
M428T403	M428T403	1.4413e+06	1.73178e+06	1.00002e+06	2.13928e+06	3.17817e+06	1.61607e+06	2.04356e+06	2.4032e+06	413503	1.27305e+06	1.41243e+06	2.03876e+06	403658	1.39869e+06	679121	302407	1.94417e+06	1.88767e+06	34.11	990203	976086	63.54	1.96	0.97	0.00699301	2.16	0.14968	1.87092	428.119	402.9	6.7	Up
M428T415	M428T415	600674	2.09345e+06	870060	980232	1.56818e+06	1.04821e+06	1.39511e+06	1.47085e+06	66335.3	798944	803844	402102	86791.6	575799	764007	1.01839e+06	1.25335e+06	1.22166e+06	37.69	564527	669903	62.12	2.22	1.15	0.004662	2.33	0.129379	1.7516	428.121	415.1	6.9	Up
M428T81_2	M428T81_2	3.60807e+06	4.67367e+06	4.77124e+06	3.74505e+06	1.3989e+06	4.02127e+06	4.08146e+06	3.64862e+06	2.87814e+06	4.26824e+06	3.15878e+06	1.46884e+06	1.18671e+06	3.46085e+06	1.22951e+06	2.8929e+06	3.74354e+06	3.88316e+06	27.9	2.56799e+06	2.88552e+06	44.51	1.46	0.54	0.0281274	1.55	0.261699	1.3506	427.976	81.1	1.4	Up
M428T833	M428T833	2.76327e+07	4.93622e+07	3.56214e+07	3.63709e+07	3.82964e+07	5.016e+07	4.35047e+07	3.58354e+07	2.32506e+07	3.76658e+07	3.19751e+07	2.15774e+07	3.4407e+07	2.2161e+07	3.01851e+07	3.0275e+07	3.95979e+07	3.73336e+07	19.27	2.89371e+07	3.023e+07	20.7	1.37	0.45	0.0104118	1.98	0.169968	1.92262	428.362	832.9	13.9	Up
M428T99_1	M428T99_1	6.99621e+06	7.88957e+06	7.20907e+06	7.57459e+06	6.52388e+06	8.11347e+06	7.77924e+06	8.21203e+06	6.84086e+06	6.00042e+06	6.61914e+06	5.8821e+06	5.98019e+06	5.61689e+06	5.60882e+06	7.07584e+06	7.53726e+06	7.67692e+06	7.77	6.20303e+06	5.99031e+06	9.1	1.22	0.28	0.0018648	2.73	0.096514	2.33877	428.019	99.3	1.7	Up
M428T99_2	M428T99_2	2.43746e+08	1.83955e+08	2.76009e+08	1.17808e+08	2.43e+08	2.42594e+08	1.74058e+08	1.5492e+08	3.58711e+08	2.55566e+08	3.00766e+08	3.83908e+08	2.28352e+08	2.26511e+08	3.30488e+08	2.12543e+08	2.04511e+08	2.13274e+08	26.72	2.87106e+08	2.78166e+08	22.89	0.71	-0.49	0.0498834	1.3	0.330421	1.79626	428.032	99.2	1.7	Down
M429T108_2	M429T108_2	3.83117e+07	2.90141e+07	4.29889e+07	4.07245e+07	2.27644e+07	3.51069e+07	2.92942e+07	3.87832e+07	2.16005e+07	1.8681e+06	5.85676e+06	2.84218e+07	1.97857e+07	2.75325e+07	3.87644e+06	4.98977e+06	3.46235e+07	3.67093e+07	20.09	1.42415e+07	1.28213e+07	78.69	2.43	1.28	0.000621601	3.21	0.069967	1.98238	429.044	107.9	1.8	Up
M429T119	M429T119	923572	925853	687396	807036	1.68557e+06	881800	1.04884e+06	1.17315e+06	960558	1.6363e+06	1.78769e+06	1.32254e+06	1.23872e+06	936421	995347	1.28317e+06	1.01665e+06	924712	30.21	1.27009e+06	1.26095e+06	24.69	0.8	-0.32	0.0498834	1.3	0.330421	1.26825	429.171	119.3	2	Down
M429T716	M429T716	889107	1.53279e+06	1.20428e+06	145200	726135	1.27264e+06	1.05626e+06	1.19017e+06	2.00003e+06	2.4032e+06	1.60865e+06	1.41261e+06	2.1073e+06	909797	1.00463e+06	2.29387e+06	1.00207e+06	1.12322e+06	42.29	1.71751e+06	1.80434e+06	33.37	0.58	-0.78	0.0281274	1.55	0.261699	1.5453	429.185	715.8	11.9	Down
M430T182	M430T182	2.14529e+06	101071	315162	510274	118506	963660	112239	112814	1.68763e+06	818556	2.8878e+06	2.24693e+06	2.94434e+06	1.92351e+06	1.88729e+06	1.45454e+06	547378	216834	129.98	1.98132e+06	1.9054e+06	35.93	0.28	-1.86	0.004662	2.33	0.129379	2.26528	430.088	182.2	3	Down
M430T553	M430T553	154213	168148	149307	140450	137431	134193	200713	281688	555452	629576	515785	534555	576190	481956	110173	434688	170768	151760	29.12	479797	525170	33.46	0.36	-1.49	0.0104118	1.98	0.169968	2.23261	430.163	553.2	9.2	Down
M431T224	M431T224	435644	650977	401689	391987	379271	402418	484185	440637	374657	254338	641527	341580	397780	315736	314826	307450	448351	419031	19.73	368487	328658	32.21	1.22	0.28	0.014763	1.83	0.200021	1.3533	431.178	223.5	3.7	Up
M431T280_1	M431T280_1	1.54427e+06	1.98713e+06	1.3735e+06	1.75213e+06	1.1662e+06	1.99881e+06	1.70513e+06	1.91623e+06	1.08645e+06	1.51923e+06	717693	202952	944398	976518	1.09131e+06	1.23739e+06	1.68042e+06	1.72863e+06	17.91	971993	1031482	39.92	1.73	0.79	0.0010878	2.96	0.0833774	1.78101	430.589	280	4.7	Up
M431T375	M431T375	758296	1.28858e+06	955219	119132	1.1682e+06	142492	658071	803138	751193	4.05043e+06	1.97309e+06	1.16502e+06	1.26117e+06	1.17047e+06	1.70589e+06	1.87587e+06	736641	780717	58.14	1.74414e+06	1.48353e+06	58.45	0.42	-1.24	0.014763	1.83	0.200021	1.80102	431.124	375	6.2	Down
M431T435	M431T435	97054.1	173875	83396.7	111197	155363	87053	144260	160273	112196	200496	194676	142950	245933	154558	219516	162129	126559	127729	28.41	179057	178402	24.5	0.71	-0.5	0.0379176	1.42	0.297283	1.66203	431.382	434.8	7.2	Down
M431T447	M431T447	168918	138205	123202	124073	136285	90152.2	121026	153449	198274	158732	139176	172979	100695	193463	158321	174419	131914	130179	17.87	162008	165856	19.36	0.81	-0.3	0.0281274	1.55	0.261699	1.42319	431.063	447.2	7.5	Down
M431T811	M431T811	3.0098e+06	3.40422e+06	2.03715e+06	4.13639e+06	3.47772e+06	3.78276e+06	2.63083e+06	5.12224e+06	1.9361e+06	1.4297e+06	2.77e+06	1.34719e+06	2.43769e+06	2.21288e+06	5.26472e+06	873613	3.45014e+06	3.44097e+06	27.37	2.28399e+06	2074491	59.36	1.51	0.6	0.0379176	1.42	0.297283	1.59571	431.355	811.1	13.5	Up
M432T801	M432T801	9.43607e+07	9.09693e+07	8.50589e+07	7.49932e+07	6.50367e+07	8.6591e+07	1.23696e+08	7.69521e+07	4.9023e+07	3.95599e+07	8.48863e+07	6.22339e+07	4.23952e+07	4.94629e+07	4.23511e+07	9.26474e+07	8.72072e+07	8.5825e+07	20.09	5.782e+07	4.9243e+07	35.34	1.51	0.59	0.014763	1.83	0.200021	1.96915	432.249	801.5	13.4	Up
M432T94	M432T94	2.88934e+06	2.81895e+06	3.31181e+06	3.92462e+06	1.86633e+06	4.91087e+06	2.37052e+06	2.53324e+06	6.39615e+06	2.30075e+06	5.66744e+06	5.825e+06	5.59688e+06	3.31391e+06	2.85426e+06	5.16055e+06	3.07821e+06	2.85414e+06	31.3	4.63937e+06	5.37872e+06	33.74	0.66	-0.59	0.0498834	1.3	0.330421	1.48609	432.168	94.3	1.6	Down
M433T117_2	M433T117_2	1.30873e+06	1.77028e+06	1.10428e+06	1.55572e+06	1.287e+06	1.25341e+06	1.69187e+06	1.73242e+06	36554.6	1.76918e+06	77751.5	51784.1	427965	1.06725e+06	1.12595e+06	1.24174e+06	1.46296e+06	1.43223e+06	17.43	724771	747607	91.37	2.02	1.01	0.014763	1.83	0.200021	1.65045	433.198	117.1	2	Up
M434T339_3	M434T339_3	3.94172e+07	3.71479e+07	2.81095e+07	3.50389e+07	4.44653e+07	4.45461e+07	3.95668e+07	3.67595e+07	4.82053e+07	9.341e+07	6.89411e+07	3.41361e+07	5.484e+07	4.27339e+07	4.80862e+07	5.32319e+07	3.81314e+07	3.82826e+07	13.94	5.54481e+07	5.07186e+07	33.05	0.69	-0.54	0.014763	1.83	0.200021	1.79725	434.14	338.6	5.6	Down
M434T349	M434T349	2.20668e+07	4.20129e+07	3.22999e+07	4.24405e+07	4.45165e+07	4.36708e+07	5.27665e+07	5.2089e+07	1.67842e+07	2.76346e+07	3.25465e+07	2.54619e+07	1.32264e+07	3.13848e+07	3.42907e+07	2.9764e+07	4.14829e+07	4.30556e+07	24.39	2.63866e+07	2.86993e+07	28.81	1.57	0.65	0.0104118	1.98	0.169968	1.90703	434.129	349.4	5.8	Up
M436T368	M436T368	3.88938e+06	3.76239e+06	3.81525e+06	5.80427e+06	4.22937e+06	3.51037e+06	3.95681e+06	2.34243e+06	2.36175e+06	1.65097e+06	3.24317e+06	3.3646e+06	2.65595e+06	3.60888e+06	3.21476e+06	1.34428e+06	3.91378e+06	3.85232e+06	24.32	2.68055e+06	2.93535e+06	31.15	1.46	0.55	0.00699301	2.16	0.14968	1.70926	436.129	368.5	6.1	Up
M436T428_1	M436T428_1	451367	500923	441737	530970	702869	260090	590578	330656	1.20341e+06	881326	1.48126e+06	799249	1.38048e+06	616965	299333	783479	476149	476145	29.46	930687	840288	42.95	0.51	-0.97	0.0104118	1.98	0.169968	1.77392	435.731	428.3	7.1	Down
M436T428_2	M436T428_2	292049	753106	34257.3	445332	2.05031e+06	778606	1.17943e+06	1.48396e+06	22480.3	252480	697626	185834	34958.3	189324	19680.3	478322	877132	765856	75.87	235088	187579	102.89	3.73	1.9	0.0206682	1.68	0.228643	1.59112	435.981	428.3	7.1	Up
M436T551	M436T551	76264.3	211981	47133.5	25491.5	35481.8	148620	78432.9	118329	253605	337531	192570	77933.3	277404	102192	87605.8	317592	92716.8	77348.6	68.64	205804	223088	51.45	0.45	-1.15	0.0281274	1.55	0.261699	1.70617	436.191	551.1	9.2	Down
M437T364	M437T364	219159	1.83938e+06	1.13216e+06	58271.5	146286	2.4363e+06	1.40385e+06	1.59252e+06	3.42799e+06	4.00136e+06	2.65152e+06	1.81493e+06	3.27764e+06	1.15767e+06	333915	4.1766e+06	1.10349e+06	1.268e+06	79.88	2.6052e+06	2.96458e+06	53.16	0.42	-1.24	0.0281274	1.55	0.261699	1.43555	437.134	364.2	6.1	Down
M437T365	M437T365	4.48316e+06	4.41064e+06	2.79808e+06	2.21234e+06	3.13425e+06	3.19696e+06	6.0074e+06	5.29367e+06	1.25091e+07	1.8137e+06	6.1977e+06	9.99813e+06	6.83269e+06	7.03387e+06	5.13551e+06	5.58097e+06	3.94206e+06	3.8038e+06	33.37	6.88771e+06	6.51519e+06	46.66	0.57	-0.81	0.0281274	1.55	0.261699	1.44099	437.121	365.1	6.1	Down
M437T388	M437T388	553543	216383	172456	192618	422843	243840	791452	903834	1.02177e+06	235620	1.02509e+06	910608	1.09469e+06	434958	544931	735998	437121	333341	65.45	750458	823303	42.14	0.58	-0.78	0.0498834	1.3	0.330421	1.45547	437.085	387.7	6.5	Down
M437T737_1	M437T737_1	319917	198289	274743	356073	272322	155708	320691	294303	182431	121953	121839	124777	220297	230093	275825	96146.2	274006	284523	24.35	171670	153604	37.88	1.6	0.67	0.014763	1.83	0.200021	1.82344	437.085	736.9	12.3	Up
M438T773_2	M438T773_2	6.50879e+06	701240	3.19239e+06	9.59625e+06	6.57214e+06	2.15152e+06	3.14691e+06	3.0273e+06	5930.72	191912	322673	1.81756e+06	185892	6.16812e+06	4.42854e+06	50854.3	4.36207e+06	3.16965e+06	67.01	1.64644e+06	257293	144.19	2.65	1.41	0.0281274	1.55	0.261699	1.69585	438.331	773.4	12.9	Up
M439T773	M439T773	3.5832e+06	317546	1.80794e+06	4.27742e+06	3.62837e+06	848679	1.31156e+06	1.2328e+06	2691.03	87079.3	146446	1.08529e+06	84348.5	2.01362e+06	1.51725e+06	23074.9	2.12594e+06	1.55975e+06	69.93	619975	116762	129.27	3.43	1.78	0.0281274	1.55	0.261699	1.74705	439.323	773.4	12.9	Up
M439T78	M439T78	520122	587293	573885	534559	579737	465303	497549	490503	627656	635516	670309	563929	585859	534072	578532	613336	531119	527340	8.6	601151	599597	7.29	0.88	-0.18	0.0206682	1.68	0.228643	1.8952	438.895	78.5	1.3	Down
M440T120	M440T120	1.3191e+06	1.23336e+06	1.53534e+06	1.20327e+06	968954	1.14652e+06	1.0714e+06	1.06411e+06	1.96897e+06	880828	2.12747e+06	1.83837e+06	1.75158e+06	1.77822e+06	1.19399e+06	2.19558e+06	1.19276e+06	1.1749e+06	14.82	1.71688e+06	1.8083e+06	26.54	0.69	-0.53	0.0379176	1.42	0.297283	1.7441	440.137	119.6	2	Down
M440T750	M440T750	1.18359e+07	6.61084e+06	5.56156e+06	4.58466e+06	856812	2.60075e+06	2.74136e+06	1.53023e+06	1.64519e+07	3.45572e+06	1.52927e+07	6.07746e+06	7.73481e+06	8.60792e+06	1.2607e+07	8.68307e+06	4.54026e+06	3.66301e+06	78.17	9.86382e+06	8.64549e+06	45.87	0.46	-1.12	0.014763	1.83	0.200021	1.79218	440.275	749.6	12.5	Down
M440T824	M440T824	3.40044e+06	1.26877e+06	3.71023e+06	6.3558e+06	3.67788e+06	1.72329e+06	3.81252e+06	1.95121e+06	1.07672e+06	984125	1.0465e+06	1.66035e+06	1.12357e+06	2.8887e+06	5.79274e+06	550345	3.23752e+06	3.53916e+06	49.97	1.89038e+06	1.10014e+06	91.31	1.71	0.78	0.0281274	1.55	0.261699	1.4717	440.276	823.7	13.7	Up
M440T840	M440T840	5.15866e+06	2.85434e+06	3.85766e+06	5.25101e+06	4.58288e+06	4.27676e+06	2.96749e+06	2.8302e+06	3.49725e+06	2.89902e+06	2.76309e+06	3.79289e+06	2.92591e+06	2.79645e+06	3.14206e+06	1.93451e+06	3.97238e+06	4.06721e+06	25.33	2.9689e+06	2.91246e+06	18.61	1.34	0.42	0.0498834	1.3	0.330421	1.57184	440.374	839.6	14	Up
M443T115	M443T115	494047	288092	356180	513482	387257	242414	340716	283811	195663	174342	250248	286316	179928	460125	327643	128535	363250	348448	27.01	250350	222955	42.66	1.45	0.54	0.0379176	1.42	0.297283	1.58857	443.169	115.2	1.9	Up
M443T458	M443T458	569663	175222	470530	572342	390660	627838	464880	865796	406864	517018	154730	126626	188178	365926	291982	246876	517116	520097	38.5	287275	269429	47.09	1.8	0.85	0.0206682	1.68	0.228643	1.64128	443.254	457.5	7.6	Up
M444T114	M444T114	742715	779428	675201	839164	492718	758963	765729	818704	80714.8	464585	84333	96606.1	94354.5	641074	403304	463534	734078	762346	14.89	291063	249955	77.75	2.52	1.33	0.0003108	3.51	0.0568482	2.09489	444.109	113.8	1.9	Up
M444T127	M444T127	1.94123e+06	3.00446e+06	4.07952e+06	4.42107e+06	3.24026e+06	2.36493e+06	3.65144e+06	3.48876e+06	2.11811e+06	2.30649e+06	957993	3.26359e+06	1.38955e+06	3.28479e+06	2.66339e+06	2.0886e+06	3.27396e+06	3.36451e+06	25.37	2.25906e+06	2.2123e+06	36.37	1.45	0.54	0.0498834	1.3	0.330421	1.59684	443.998	126.5	2.1	Up
M444T470	M444T470	272889	104593	284722	806121	201744	121499	485700	357030	2.0998e+06	712705	459130	651619	1.10244e+06	430474	1.18073e+06	696687	329287	278806	69.6	916699	704696	59.89	0.36	-1.48	0.00699301	2.16	0.14968	2.03103	444.179	470.3	7.8	Down
M444T82	M444T82	1.81707e+06	497847	782874	719624	546167	892601	638019	610999	890258	818542	885742	1.26703e+06	938125	1.44762e+06	1.48399e+06	1.18219e+06	813151	678822	52.3	1.11419e+06	1.06016e+06	23.91	0.73	-0.45	0.0281274	1.55	0.261699	1.62187	443.955	81.5	1.4	Down
M445T164	M445T164	1.22301e+07	1.04057e+07	1.18272e+07	1.67713e+07	1.32432e+07	9.40704e+06	8.18102e+06	9.3786e+06	7.64768e+06	1.5896e+06	1.15305e+07	1.22092e+07	7.29046e+06	9.94846e+06	7.01109e+06	1.41034e+06	1.14305e+07	1.11164e+07	23.96	7.32967e+06	7.46907e+06	55.66	1.56	0.64	0.0379176	1.42	0.297283	1.46376	445.132	163.9	2.7	Up
M445T242	M445T242	1.65819e+07	1.77774e+07	1.62343e+07	1.88766e+07	2.20789e+07	1.69374e+07	2.11003e+07	1.60941e+07	9.19726e+06	1.15151e+07	1.36113e+07	1.1102e+07	1.4699e+07	1.4987e+07	9.73278e+06	9.83925e+06	1.82101e+07	1.73574e+07	12.56	1.18355e+07	1.13086e+07	19.5	1.54	0.62	0.0001554	3.81	0.0532196	2.45818	445.134	242.1	4	Up
M445T318	M445T318	6.51857e+06	7.50543e+06	1.08539e+07	1.06474e+07	1.31334e+07	8.64251e+06	1.06562e+07	1.05708e+07	7.28362e+06	1.90995e+07	1.1628e+07	1.22579e+07	1.43433e+07	1.32407e+07	1.07373e+07	1.33606e+07	9.81601e+06	1.06091e+07	21.66	1.27439e+07	1.27493e+07	26.34	0.77	-0.38	0.0281274	1.55	0.261699	1.34201	445.134	318.5	5.3	Down
M445T355	M445T355	8.52426e+06	1.58021e+07	5.63591e+06	7.5522e+06	1.26149e+07	1.15891e+07	1.25458e+07	1.18994e+07	7.51585e+06	4.91022e+06	7.35945e+06	4.39315e+06	7.67418e+06	6.3104e+06	5.84318e+06	4.48715e+06	1.07705e+07	1.17443e+07	30.51	6.0617e+06	6.07679e+06	22.57	1.78	0.83	0.004662	2.33	0.129379	2.12723	445.108	354.7	5.9	Up
M446T359	M446T359	130819	84726.3	165025	317527	21742.2	44484.5	91246.5	312692	1.09429e+06	55096.4	717754	551138	344465	337870	218502	114184	146033	111033	77.77	429162	341168	80.7	0.34	-1.56	0.0379176	1.42	0.297283	1.4665	445.711	359.1	6	Down
M446T427	M446T427	40650.7	40185.2	26680.7	11995.9	24651.9	133578	37148.9	189783	155237	236886	153955	141991	194408	108688	131639	147567	63084.3	38667.1	100.5	158796	150761	25.03	0.4	-1.33	0.0104118	1.98	0.169968	2.13803	446.489	427	7.1	Down
M446T498	M446T498	334917	312532	356472	262408	407589	439743	838859	813064	1.03361e+06	1.93289e+06	1.20385e+06	1.52031e+06	746175	924712	968694	1.58856e+06	470698	382030	48.02	1.23985e+06	1.11873e+06	32.56	0.38	-1.4	0.000621601	3.21	0.069967	2.40482	446.194	498.2	8.3	Down
M446T545_1	M446T545_1	592944	954362	897902	1.11353e+06	1.04022e+06	1.16476e+06	929013	1.73626e+06	284952	285282	884009	618269	176403	365128	287379	568894	1.05362e+06	997293	30.94	433789	326254	54.52	2.43	1.28	0.000621601	3.21	0.069967	2.33939	445.95	545.4	9.1	Up
M447T462	M447T462	189573	221072	153993	265297	236820	226170	124412	224001	172891	122811	215315	44495.2	109418	101662	100693	140768	205167	222536	22.6	126006	116114	40.86	1.63	0.7	0.004662	2.33	0.129379	1.83598	447.24	461.6	7.7	Up
M449T114	M449T114	6.39514e+06	6.58842e+06	7.62282e+06	5.16118e+06	6.12556e+06	4.72449e+06	9.0583e+06	5.76974e+06	462886	3.16175e+06	1.8805e+06	3.17647e+06	495210	3.41084e+06	2.44273e+06	3.35589e+06	6430705	6.26035e+06	21.52	2.29829e+06	2.80224e+06	53.77	2.8	1.48	0.0001554	3.81	0.0532196	2.16358	448.985	114.2	1.9	Up
M449T352	M449T352	4.65023e+06	6.92816e+06	7.5975e+06	8.74639e+06	7.33951e+06	6.8218e+06	7.95133e+06	6.42466e+06	6.20247e+06	5.08515e+06	7.56459e+06	5.87686e+06	5.67175e+06	5.89836e+06	4.92244e+06	6.46612e+06	7.05745e+06	7.13384e+06	17.18	5.96097e+06	5.88761e+06	13.93	1.18	0.24	0.0498834	1.3	0.330421	1.50209	449.202	351.8	5.9	Up
M449T463	M449T463	310309	476268	359365	452393	193875	572227	487968	695751	221452	270992	191991	350228	193031	286575	307817	272184	443520	464331	35.18	261784	271588	21.4	1.69	0.76	0.00699301	2.16	0.14968	1.90701	449.222	462.8	7.7	Up
M450T533_2	M450T533_2	1.57832e+06	1.02479e+06	1.96278e+06	2.2956e+06	1.88058e+06	819421	1.69888e+06	1.58045e+06	990011	1.83163e+06	1.42689e+06	496282	792331	1.39855e+06	1.5743e+06	860779	1.6051e+06	1.63966e+06	30.2	1.17135e+06	1.19428e+06	38.77	1.37	0.45	0.0498834	1.3	0.330421	1.2467	450.2	532.7	8.9	Up
M450T795_2	M450T795_2	5.80341e+07	6.10709e+07	5.84109e+07	4.70387e+07	5.63393e+07	6.48365e+07	7.06639e+07	7.08841e+07	3.72725e+07	3.56143e+07	4.28923e+07	6.51815e+07	5.81423e+07	5.72144e+07	5.60674e+07	2.77708e+07	6.09098e+07	5.97409e+07	12.99	4.75194e+07	4.94798e+07	28.12	1.28	0.36	0.0379176	1.42	0.297283	1.58143	450.358	795.2	13.3	Up
M450T824	M450T824	5.39549e+06	2.78141e+06	4.53568e+06	7.55781e+06	3.57117e+06	1.25253e+06	1.98219e+06	2.04366e+06	135989	749224	1.17431e+06	3.1577e+06	866427	4.15391e+06	2.02404e+06	283715	3.63999e+06	3.17629e+06	57.79	1.56816e+06	1.02037e+06	91.59	2.32	1.21	0.0281274	1.55	0.261699	1.65127	450.363	824.1	13.7	Up
M451T100	M451T100	857639	1.31406e+06	997219	1.78657e+06	1.19394e+06	1.38575e+06	959339	1.40869e+06	265725	523514	232308	262448	238908	625026	572417	592909	1.2379e+06	1.254e+06	24.42	414157	394620	43.02	2.99	1.58	0.0001554	3.81	0.0532196	2.57375	451.022	99.7	1.7	Up
M451T82	M451T82	324903	265488	268555	254409	239598	258487	209104	228282	268522	289197	293484	297245	292003	347597	309381	313300	256103	256448	13.4	301341	295364	7.67	0.85	-0.23	0.0104118	1.98	0.169968	1.98081	450.76	82.1	1.4	Down
M452T334_1	M452T334_1	9.64832e+06	7.10139e+06	7.22666e+06	1.11574e+07	2.70991e+06	6.40673e+06	6.39807e+06	7.08267e+06	4.46555e+06	1.62464e+06	3.80531e+06	4.71783e+06	3.84877e+06	4.35376e+06	3.66666e+06	2.0906e+06	7.21639e+06	7.09203e+06	34.39	3.57164e+06	3.82704e+06	31.48	2.02	1.01	0.004662	2.33	0.129379	2.00593	452.118	333.7	5.6	Up
M453T333	M453T333	4.76654e+06	4.52287e+06	3.21423e+06	4.169e+06	1.5844e+06	2.92565e+06	4.56539e+06	5.46026e+06	5.08136e+06	8.53466e+06	4.90418e+06	4.1289e+06	5.49219e+06	5.03579e+06	5.89706e+06	5.33958e+06	3.90104e+06	4.34593e+06	31.94	5.55171e+06	5.21047e+06	23.58	0.7	-0.51	0.014763	1.83	0.200021	1.63805	453.133	333.5	5.6	Down
M453T334	M453T334	2.72607e+06	2.55804e+06	2.3047e+06	2.71297e+06	2.52459e+06	2.35663e+06	2.63303e+06	2.33858e+06	2.92763e+06	3.13869e+06	2.91008e+06	2.74049e+06	2.73556e+06	2.43326e+06	2.66617e+06	2.8992e+06	2.51933e+06	2.54132e+06	6.71	2.80639e+06	2.81985e+06	7.53	0.9	-0.16	0.00699301	2.16	0.14968	1.8485	453.144	333.6	5.6	Down
M453T82_1	M453T82_1	708610	729025	938302	730120	782478	892583	253406	831934	790144	932393	993441	885508	771962	939050	829464	1.02081e+06	733307	756299	28.72	895346	908951	10.29	0.82	-0.29	0.0498834	1.3	0.330421	1.20757	452.81	82	1.4	Down
M455T368	M455T368	166333	282461	237498	107670	260950	219990	355615	399659	716547	383218	936493	516442	723141	278867	347427	260011	253772	249224	37.36	520268	449830	47.51	0.49	-1.04	0.0206682	1.68	0.228643	1.86515	455.091	368.5	6.1	Down
M456T343	M456T343	241657	971076	379213	437890	249028	501585	908815	904205	313915	520868	233205	244123	220886	238816	587701	230744	574184	469737	53.34	323782	241469	45.15	1.77	0.83	0.0498834	1.3	0.330421	1.49291	456.053	343	5.7	Up
M456T420_1	M456T420_1	1.05852e+06	219061	764898	627988	322564	514220	601199	462583	533483	1.06539e+06	877343	1.54106e+06	628855	721909	1.51635e+06	838591	571379	557709	45.83	965374	857967	39.69	0.59	-0.76	0.0206682	1.68	0.228643	1.70132	455.589	420.3	7	Down
M456T626	M456T626	259238	854967	703182	867353	351217	833021	552556	492664	545673	214638	198748	502746	549893	425390	204793	324234	614275	627869	38.5	370764	374812	41.63	1.66	0.73	0.0379176	1.42	0.297283	1.61342	456.184	626.3	10.4	Up
M457T431_3	M457T431_3	1.56532e+06	1.05088e+06	1.47408e+06	1.4152e+06	919798	1.37438e+06	1.16536e+06	1.25588e+06	1.29747e+06	297674	887842	532624	448783	1.70561e+06	338002	979432	1.27761e+06	1.31513e+06	17.31	810930	710233	61.96	1.58	0.66	0.0498834	1.3	0.330421	1.70081	457.496	430.8	7.2	Up
M457T444	M457T444	566062	131533	116039	105436	261781	173855	111431	311788	603755	1.13492e+06	335162	506317	473645	385882	174379	476459	222240	152694	71.26	511315	475052	55.34	0.43	-1.2	0.0104118	1.98	0.169968	1.95824	456.792	444	7.4	Down
M458T368	M458T368	382341	462284	309523	354291	483744	498516	370833	359574	698515	431447	672793	536581	630706	653709	554330	474341	402638	376587	17.21	581553	592518	16.75	0.69	-0.53	0.0029526	2.53	0.116769	2.20942	458.075	368.5	6.1	Down
M458T625_1	M458T625_1	3.80676e+06	3.95854e+06	3.28034e+06	3.68643e+06	2.04441e+06	2.19617e+06	1.97618e+06	2.03445e+06	1.99007e+06	3.04369e+06	1.23317e+06	4.06002e+06	1.63271e+06	1.82432e+06	1.24125e+06	1.41869e+06	2.87291e+06	2.73826e+06	30.94	2.05549e+06	1.72852e+06	48.57	1.4	0.48	0.0498834	1.3	0.330421	1.3939	458.262	624.8	10.4	Up
M458T703	M458T703	411798	129185	310129	683376	462746	243853	245315	246693	44913.2	39897.5	167432	247251	155100	188585	348971	18071.1	341637	278411	50.74	151278	161266	75.55	2.26	1.18	0.0379176	1.42	0.297283	1.6991	458.162	702.8	11.7	Up
M458T729	M458T729	437356	413015	482481	487651	419547	403537	370231	428766	463968	417007	262582	337461	366604	160275	388283	383574	430323	424157	9.13	347469	375089	27.54	1.24	0.31	0.0281274	1.55	0.261699	1.40277	458.258	729.4	12.2	Up
M459T600	M459T600	296051	104368	86001.4	175977	340958	112753	148278	259404	36618.1	27633.4	63320.8	101926	79745.9	262719	102069	27611.9	190474	162127	50.55	87705.6	71533.4	87.82	2.17	1.12	0.0104118	1.98	0.169968	1.77184	459.302	599.7	10	Up
M459T82_2	M459T82_2	2.48782e+06	2.3305e+06	2.5318e+06	1.52812e+06	1.10645e+06	2.02985e+06	2.06674e+06	2.10722e+06	3.03683e+06	2.07407e+06	4.55068e+06	2.90232e+06	2.93319e+06	1.5938e+06	2.68776e+06	2.65707e+06	2.02356e+06	2.08698e+06	24.09	2.80447e+06	2.79504e+06	30.63	0.72	-0.47	0.0206682	1.68	0.228643	1.51628	458.816	81.8	1.4	Down
M460T349	M460T349	658927	650128	602842	788945	673985	876211	671383	930834	586978	633057	703056	563978	541314	490562	650365	505873	731657	672684	16.28	584398	575478	12.62	1.25	0.32	0.0104118	1.98	0.169968	1.93852	460.193	349.3	5.8	Up
M460T625	M460T625	630879	1.03818e+06	1.7063e+06	1.24212e+06	1.5606e+06	1.94312e+06	1.24822e+06	1.19469e+06	1.97685e+06	1.42777e+06	1.72409e+06	2.50098e+06	1.25305e+06	1.64915e+06	1.27402e+06	1.91245e+06	1.32051e+06	1.24517e+06	31.05	1714796	1.68662e+06	24.35	0.77	-0.38	0.0498834	1.3	0.330421	1.25929	460.279	624.8	10.4	Down
M461T491_1	M461T491_1	1.07836e+06	1.35286e+06	1.52576e+06	2.21958e+06	1.79753e+06	854650	1.4447e+06	2.07724e+06	1.51402e+06	1.10119e+06	771407	917077	1.08068e+06	991235	878083	1.30073e+06	1.54384e+06	1.48523e+06	30.42	1.0693e+06	1.03596e+06	22.55	1.44	0.53	0.0498834	1.3	0.330421	1.70005	460.593	491.2	8.2	Up
M461T497_2	M461T497_2	369783	660744	698554	749667	887790	696695	398325	691728	843523	1.51587e+07	1.65593e+06	920247	796665	618705	1.14713e+06	889942	644161	694211	27.17	2.75385e+06	905095	182.36	0.23	-2.1	0.0104118	1.98	0.169968	1.3808	461.416	497	8.3	Down
M462T610_2	M462T610_2	1.0605e+06	721099	1.00791e+06	1.00521e+06	1.16904e+06	806235	381185	820738	171500	63879.3	272755	644374	321519	636887	817968	31337.2	871490	912973	28.46	370028	297137	79.57	2.36	1.24	0.0029526	2.53	0.116769	1.80222	462.132	609.9	10.2	Up
M462T747	M462T747	1.16276e+06	1.02783e+06	778114	967322	1.07841e+06	234363	805405	1.28574e+06	253327	147713	299169	689243	272887	1.02803e+06	725885	96313.9	917494	997577	35.32	439071	286028	75.82	2.09	1.06	0.0206682	1.68	0.228643	1.69208	462.357	747.3	12.5	Up
M462T773	M462T773	1.1264e+06	846407	1.87037e+06	2.14941e+06	1.58403e+06	582614	2.21035e+06	1.03233e+06	796344	754407	238238	562927	1.99931e+06	207156	505410	1.77462e+06	1.42524e+06	1.35521e+06	43.19	854802	658667	78.8	1.67	0.74	0.0498834	1.3	0.330421	1.43006	462.321	772.9	12.9	Up
M463T356	M463T356	485772	318693	497848	243876	378358	361373	283575	205360	690555	640702	753609	623863	504382	361060	572510	612766	346857	340033	30.57	594931	618314	20.19	0.58	-0.78	0.0018648	2.73	0.096514	2.24727	463.185	356.4	5.9	Down
M463T380_2	M463T380_2	401256	594114	341040	126015	636007	529019	477375	450824	786870	863055	1.22652e+06	565766	900363	414199	581212	689890	444456	464100	36.21	753485	738380	33.37	0.59	-0.76	0.014763	1.83	0.200021	1.73678	463.224	380.1	6.3	Down
M463T78_1	M463T78_1	1.31019e+06	6.92333e+06	4.37277e+06	3.25089e+06	3.62586e+06	3.49034e+06	7.10956e+06	6.85293e+06	6.4697e+06	7.18008e+06	9.08302e+06	5.97946e+06	7.80068e+06	6.21415e+06	7.02321e+06	8.25468e+06	4.61698e+06	3.99931e+06	46.05	7.25062e+06	7.10165e+06	14.77	0.64	-0.65	0.0206682	1.68	0.228643	1.65499	463.02	78.2	1.3	Down
M463T80_2	M463T80_2	5.27988e+07	8.70148e+07	8.03848e+07	6.11531e+07	6.76538e+07	8.60034e+07	5.46018e+07	6.91256e+07	1.44568e+08	8.57799e+07	1.8565e+08	1.14646e+08	1.33844e+08	7.26454e+07	6.76172e+07	1.14153e+08	6.9842e+07	6.83897e+07	19.29	1.14863e+08	1.14399e+08	34.69	0.61	-0.72	0.0206682	1.68	0.228643	1.90217	462.859	80.1	1.3	Down
M464T423	M464T423	715868	687841	586499	1.14657e+06	725511	497496	906523	896417	1.37465e+06	2.3136e+06	2.30137e+06	1.05516e+06	1.2534e+06	963907	1.0682e+06	1.844e+06	770341	720689	26.69	1.52179e+06	1.31402e+06	36.56	0.51	-0.98	0.0010878	2.96	0.0833774	2.17197	464.223	422.9	7	Down
M464T506_2	M464T506_2	3.55534e+06	3.46341e+06	4.67088e+06	3.95741e+06	1.06247e+07	1.56231e+06	4.19449e+06	6.99646e+06	1.9635e+06	2.67214e+06	2.95906e+06	3.39492e+06	3.18929e+06	4.5891e+06	2.06879e+06	2.09554e+06	4.87812e+06	4.07595e+06	56.73	2.86654e+06	2.8156e+06	30.76	1.7	0.77	0.0379176	1.42	0.297283	1.38097	464.211	506.3	8.4	Up
M464T747	M464T747	560348	330634	463940	554317	504266	234516	347053	369389	778722	687120	849029	859549	839517	497110	392099	662471	420558	416665	28	695702	732921	24.94	0.6	-0.73	0.00699301	2.16	0.14968	2.01786	464.278	747.4	12.5	Down
M464T807	M464T807	484453	933500	2.12096e+06	1.33945e+06	537009	996059	1.18054e+06	1.39349e+06	432312	492730	1.07299e+06	898083	675314	802258	193837	576292	1.12318e+06	1.0883e+06	46.66	642978	625803	43.58	1.75	0.8	0.0498834	1.3	0.330421	1.56871	464.276	807.4	13.5	Up
M465T603_1	M465T603_1	610878	303597	638300	422770	597601	132598	504405	170490	1.09676e+06	723344	1.01007e+06	527147	818675	455309	881513	977803	422580	463588	47.42	811328	850094	28.3	0.52	-0.94	0.00699301	2.16	0.14968	1.93289	464.651	602.8	10	Down
M466T840_1	M466T840_1	3.45671e+07	4.48323e+07	1.94138e+07	2.53366e+07	2.29509e+07	3.70579e+07	3.83233e+07	2.12959e+07	7.41113e+06	1.18928e+07	5.99337e+06	1.91145e+07	1.62928e+07	1.05107e+07	1.949e+07	1.74651e+07	3.04722e+07	2.99519e+07	30.82	1.35213e+07	1.40928e+07	39.12	2.25	1.17	0.0003108	3.51	0.0568482	2.23138	466.289	839.8	14	Up
M466T99	M466T99	1.77757e+06	894402	1.33825e+06	909775	190622	314404	1.04119e+06	1.05299e+06	3.9169e+06	1.34807e+06	3.63148e+06	5.8611e+06	3.13124e+06	1.89698e+06	1.46891e+06	1.28469e+06	939900	975484	54.53	2.81742e+06	2.51411e+06	57.56	0.33	-1.58	0.0018648	2.73	0.096514	2.01779	465.99	99.2	1.7	Down
M467T78	M467T78	159439	146948	159885	187542	169089	149762	150275	154232	129313	125741	148683	152078	125540	152849	135589	112332	159646	156836	8.35	135266	132451	10.89	1.18	0.24	0.00699301	2.16	0.14968	2.05216	466.968	77.6	1.3	Up
M467T840	M467T840	1.00452e+07	6.61892e+06	6.24472e+06	6.23397e+06	8.22903e+06	6.26602e+06	6.37798e+06	6.72888e+06	1.22005e+06	3.23054e+06	1.03117e+06	4.7608e+06	3.78845e+06	2.77541e+06	4.50476e+06	1.34444e+06	7.09309e+06	6.49845e+06	19.22	2.83195e+06	3.00298e+06	52.8	2.5	1.32	0.0001554	3.81	0.0532196	2.2642	467.296	839.8	14	Up
M468T767_1	M468T767_1	1.81098e+07	5.02905e+07	2.03722e+07	2.48837e+07	4.57886e+07	2.13271e+07	4.25495e+07	3.46064e+07	4.54773e+07	2.85808e+07	6.95596e+07	4.3591e+07	5.58095e+07	9.752e+07	4.51455e+07	4.11864e+07	3.2241e+07	2.9745e+07	39.49	5.33588e+07	4.53114e+07	40.11	0.6	-0.73	0.0498834	1.3	0.330421	1.65806	468.267	767.1	12.8	Down
M468T80	M468T80	3.32564e+06	2.62723e+06	3.76105e+06	2.72405e+06	2.13125e+06	2.45769e+06	2.2659e+06	2.29826e+06	4.04889e+06	2.65804e+06	4.44794e+06	4.39974e+06	3.43679e+06	4.5946e+06	2.45867e+06	4.47035e+06	2.69888e+06	2.54246e+06	21.03	3.81438e+06	4.22432e+06	22.5	0.71	-0.5	0.0104118	1.98	0.169968	1.86876	468.1	79.8	1.3	Down
M469T812_2	M469T812_2	6.86112e+06	4.73497e+06	9.33776e+06	8.01368e+06	6.51212e+06	7.86204e+06	6.97679e+06	6.37017e+06	5.47767e+06	4.45865e+06	5.78785e+06	3.55183e+06	6.54356e+06	6.10132e+06	3.06885e+06	5.31689e+06	7.08358e+06	6.91895e+06	19.21	5.03833e+06	5.39728e+06	24.48	1.41	0.49	0.00699301	2.16	0.14968	1.84533	469.378	812.4	13.5	Up
M469T82_1	M469T82_1	1.08453e+07	1.53362e+07	1.35361e+07	1.4241e+07	1.45111e+07	1.46402e+07	1.57044e+07	1.60099e+07	7.589e+06	1.20162e+07	7.79476e+06	7.71271e+06	6.13557e+06	9.8331e+06	8.79421e+06	1.07401e+07	1.4353e+07	1.45757e+07	11.37	8.82695e+06	8.29449e+06	21.8	1.63	0.7	0.0003108	3.51	0.0568482	2.50212	468.819	81.8	1.4	Up
M469T99_2	M469T99_2	3.89856e+06	7.98971e+06	992015	6.2764e+06	5.12742e+06	6.2321e+06	4.33778e+06	7.1972e+06	1.22588e+07	1.32904e+07	1.07673e+07	1.08938e+07	2.81181e+06	1.11943e+07	1.2403e+07	1.21632e+07	5.2564e+06	5.67976e+06	42	1.07228e+07	1.16788e+07	30.87	0.49	-1.03	0.00699301	2.16	0.14968	1.62921	469.077	98.8	1.6	Down
M470T808	M470T808	3.86975e+06	5.17012e+06	4.66704e+06	5.09533e+06	4.09592e+06	3.78523e+06	5.05612e+06	2.36662e+06	2.46719e+06	2.85654e+06	1.08641e+06	1.34549e+06	8.848e+06	3.71297e+06	3.64932e+06	1.44094e+06	4.26327e+06	4.38148e+06	22.28	3.17586e+06	2.66186e+06	78.96	1.34	0.42	0.0379176	1.42	0.297283	1.30276	470.332	808.1	13.5	Up
M471T707_2	M471T707_2	62929.1	148084	97839.7	133497	62443.3	53731.8	73781	86311.6	66496.4	82767.7	33874.2	40767.3	42897.1	42896	44726.4	112050	89827.1	80046.3	38.59	58309.4	43811.7	46.37	1.54	0.62	0.0498834	1.3	0.330421	1.59029	471.318	706.6	11.8	Up
M472T678_2	M472T678_2	602170	1.93694e+06	643516	870350	562256	795018	1.65761e+06	926213	2.71902e+06	2.42487e+06	1.75361e+06	1.85658e+06	2.27609e+06	2.11765e+06	1.92777e+06	2.2084e+06	999259	832684	51.47	2.1605e+06	2.16303e+06	14.76	0.46	-1.11	0.0010878	2.96	0.0833774	2.34128	472.3	678.1	11.3	Down
M472T779	M472T779	4.40739e+06	5.22989e+06	4.54486e+06	4.29248e+06	3.36985e+06	4.18838e+06	4.18058e+06	4.65218e+06	2.76434e+06	2.61656e+06	2.81685e+06	4.35339e+06	4.88639e+06	3.04568e+06	2.92897e+06	3.93474e+06	4.3582e+06	4.34994e+06	12.03	3.41836e+06	2.98732e+06	24.99	1.27	0.35	0.0379176	1.42	0.297283	1.75648	472.237	779.2	13	Up
M472T811_2	M472T811_2	3.52513e+07	3.63048e+07	4.70837e+07	4.22465e+07	3.64992e+07	4.60479e+07	3.58627e+07	3.06147e+07	1.50889e+07	3.43927e+07	3.63206e+07	1.46521e+07	2.60217e+07	3.29381e+07	2.84368e+07	1.15233e+07	3.87388e+07	3.6402e+07	14.88	2.49218e+07	2.72293e+07	39.52	1.55	0.64	0.004662	2.33	0.129379	1.87242	472.349	810.7	13.5	Up
M473T100	M473T100	904866	803824	856908	723515	317401	723746	809185	819242	957696	862996	1.09003e+06	848028	780859	860661	833726	1.04442e+06	744836	806505	24.6	909802	861828	12.02	0.82	-0.29	0.0281274	1.55	0.261699	1.32928	473.093	99.7	1.7	Down
M473T355_2	M473T355_2	1.25999e+06	564018	854529	768332	691683	419120	477544	756474	1.25482e+06	1.02266e+06	1.64114e+06	720861	915706	559325	1.46626e+06	1.36768e+06	723961	724078	36.46	1.11856e+06	1.13874e+06	33.72	0.65	-0.63	0.0498834	1.3	0.330421	1.65802	473.261	354.9	5.9	Down
M475T459_1	M475T459_1	350905	261451	279084	348967	390415	383594	368095	236067	77041.4	80493.2	85764.2	265222	168491	104902	96908.4	295219	327322	349936	18.19	146755	100905	59.71	2.23	1.16	0.0029526	2.53	0.116769	2.28426	474.94	459.1	7.7	Up
M475T791	M475T791	692330	676077	658434	842319	582385	808515	454979	537135	521110	373986	357937	375462	481089	309249	552190	843504	656522	667256	19.91	476816	428275	35.91	1.38	0.46	0.0379176	1.42	0.297283	1.6802	475.233	791.3	13.2	Up
M475T812	M475T812	1.45717e+07	1.62024e+07	2.5483e+07	1.65146e+07	1.00728e+07	1.04765e+07	2.75689e+06	6.99827e+06	1.13919e+07	5.65081e+06	3.96905e+06	1.01838e+07	7.28075e+06	2.9688e+06	1.86145e+06	3.06316e+06	1.28845e+07	1.25241e+07	53.83	5.79621e+06	4.80993e+06	60.85	2.22	1.15	0.0498834	1.3	0.330421	1.60711	475.293	811.6	13.5	Up
M475T86	M475T86	1.72513e+06	2.23653e+06	1.92456e+06	2.1816e+06	1.89244e+06	1.98082e+06	1.87272e+06	2.12985e+06	1.57311e+06	1.66587e+06	1.59749e+06	1.71329e+06	1.31804e+06	1.35085e+06	1.58159e+06	1.74733e+06	1.99296e+06	1.95269e+06	8.79	1.56845e+06	1.58954e+06	10.04	1.27	0.35	0.0003108	3.51	0.0568482	2.42436	475.028	85.9	1.4	Up
M476T299	M476T299	487610	843308	493130	476647	356388	1.08348e+06	454182	488717	883434	699561	799911	567410	960504	717478	790313	1.41483e+06	585432	488164	42.02	854181	795112	29.96	0.69	-0.55	0.0379176	1.42	0.297283	1.65326	476.197	298.9	5	Down
M476T470_1	M476T470_1	1.15912e+07	8.01342e+06	9.13711e+06	6.54069e+06	1.01246e+07	8.28136e+06	4.69857e+06	9.11171e+06	4.0695e+06	6.22215e+06	8.52047e+06	7.13447e+06	5.93598e+06	4.38396e+06	5.52821e+06	4.14902e+06	8.43732e+06	8.69654e+06	25.15	5.74297e+06	5.7321e+06	27.26	1.47	0.55	0.014763	1.83	0.200021	1.72385	476.303	470.4	7.8	Up
M476T579	M476T579	131875	792935	218644	345383	140874	541450	712448	492625	843151	1.3251e+06	859201	738326	979485	267560	490456	844894	422029	419004	60.19	793521	844023	39.8	0.53	-0.91	0.0206682	1.68	0.228643	1.539	476.204	579.2	9.7	Down
M476T795	M476T795	2.90245e+06	4.15373e+06	2.13522e+06	3.60723e+06	2.69869e+06	3.58226e+06	3.64157e+06	3.28814e+06	3.08497e+06	5.47102e+06	4.25826e+06	3.05543e+06	4.08245e+06	4.41959e+06	4.08589e+06	4.60965e+06	3.25116e+06	3.4352e+06	19.72	4.13341e+06	4.17208e+06	19.14	0.79	-0.35	0.0379176	1.42	0.297283	1.53772	476.182	795.1	13.3	Down
M477T470_1	M477T470_1	1.80341e+06	1.58547e+06	1.76038e+06	3.5702e+06	2.62354e+06	2.16816e+06	2.46131e+06	2.26358e+06	1.1763e+06	630412	1.40593e+06	450633	231353	580544	527394	776010	2.27951e+06	2.21587e+06	27.78	722322	605478	53.81	3.16	1.66	0.0001554	3.81	0.0532196	2.50647	477.307	470.4	7.8	Up
M478T388	M478T388	463056	564521	683461	488913	308402	510222	317631	392722	318775	250655	290934	228453	286915	455770	466504	441618	466116	475985	27.1	342453	304854	28.31	1.36	0.44	0.0379176	1.42	0.297283	1.49103	478.31	387.8	6.5	Up
M478T617_2	M478T617_2	1.57268e+06	1.55356e+06	1.37246e+06	1.81489e+06	1.12356e+06	1.6614e+06	1.71227e+06	1.63174e+06	1.59945e+06	1.47302e+06	1.08158e+06	1.22082e+06	1.18199e+06	1.33747e+06	1.53975e+06	1.37293e+06	1.55532e+06	1.60221e+06	13.94	1.35088e+06	1.3552e+06	13.45	1.15	0.2	0.0498834	1.3	0.330421	1.37787	478.233	616.9	10.3	Up
M478T647_1	M478T647_1	2.58709e+06	1.39407e+06	1.83279e+06	520729	938075	1.33289e+06	1.06432e+06	1.04789e+06	859444	975806	798465	837465	1.22317e+06	691386	891291	743992	1.33973e+06	1.19861e+06	47.17	877628	848455	18.77	1.53	0.61	0.0379176	1.42	0.297283	1.19951	477.658	647	10.8	Up
M478T647_2	M478T647_2	173168	476370	423954	297841	288722	479925	276521	267463	503418	403507	433830	372515	510596	526872	477796	451126	335495	293281	33.15	459958	464461	11.86	0.73	-0.46	0.0281274	1.55	0.261699	1.69904	477.67	647	10.8	Down
M479T388	M479T388	168456	177995	404098	655221	173542	322296	1.03967e+06	310347	842478	1.26226e+06	1.32313e+06	646796	1.27781e+06	1.13768e+06	406382	979639	406453	316321	74.52	984523	1.05866e+06	33.68	0.41	-1.28	0.004662	2.33	0.129379	2.02367	479.304	387.8	6.5	Down
M479T839	M479T839	1.61762e+07	1.52574e+07	1.73706e+07	2.32756e+07	1.07887e+07	1.655e+07	1.17275e+07	1.66939e+07	1.1465e+07	1.28609e+07	1.40192e+07	9.14425e+06	4.95828e+06	9.5589e+06	1.05755e+07	1.52389e+07	1.598e+07	1.63631e+07	23.84	1.09776e+07	1.10203e+07	29.41	1.46	0.54	0.00699301	2.16	0.14968	1.74271	479.301	839.2	14	Up
M480T187	M480T187	1.47126e+06	1.52497e+06	1.56462e+06	1.31748e+06	1.44753e+06	1.09941e+06	1.28466e+06	1.06553e+06	1.42779e+06	1.55567e+06	1.60759e+06	1.7275e+06	1.5597e+06	1.62784e+06	1.65541e+06	1.75139e+06	1.34693e+06	1.38251e+06	14.03	1.61411e+06	1.61771e+06	6.4	0.83	-0.26	0.004662	2.33	0.129379	2.01124	480.122	186.6	3.1	Down
M480T815	M480T815	1.48553e+07	2.72887e+07	2.5221e+07	2.27754e+07	2.78038e+07	4.67301e+07	2.48882e+07	2.42455e+07	3.05456e+07	4.05472e+06	2.49829e+07	1.31446e+07	1.59844e+07	1.16957e+07	8.20897e+06	2.2177e+07	2.6726e+07	2.50546e+07	33.76	1.63492e+07	1.45645e+07	54.68	1.63	0.71	0.0498834	1.3	0.330421	1.62898	480.344	815.5	13.6	Up
M480T816	M480T816	1.19633e+07	2.16381e+07	1.26588e+07	1.1354e+07	9.81335e+06	1.98769e+07	1.17674e+07	1.1893e+07	1.15205e+07	4.69785e+06	6.58357e+06	9.32149e+06	7.18765e+06	7.348e+06	6.72349e+06	1.22641e+07	1.38706e+07	1.19282e+07	31.38	8.20583e+06	7.26782e+06	31.78	1.69	0.76	0.00699301	2.16	0.14968	2.04594	480.356	815.5	13.6	Up
M481T140	M481T140	1.62632e+06	1.84133e+06	966240	2.56306e+06	4.02955e+06	996149	2.89178e+06	3.28634e+06	3.06309e+06	3.60538e+06	3.23335e+06	3.28398e+06	1.0994e+06	9.75854e+06	8.01357e+06	7.34085e+06	2.2751e+06	2.20219e+06	48.5	4.92477e+06	3.44468e+06	61.46	0.46	-1.11	0.0498834	1.3	0.330421	1.48375	481.161	139.6	2.3	Down
M481T294	M481T294	199646	141560	132439	195476	144318	131013	149558	185871	281594	199184	286010	147579	280687	210767	194619	448938	159985	146938	17.98	256172	245727	36.2	0.62	-0.68	0.00699301	2.16	0.14968	1.93004	480.575	293.8	4.9	Down
M481T80_2	M481T80_2	1.16109e+07	7.48503e+06	1.24876e+07	1.53939e+07	1.36276e+07	1.11866e+07	1.0251e+07	1.0061e+07	9.80564e+06	1.06859e+07	9.36694e+06	1.13032e+07	5.19068e+06	9.49962e+06	1.00566e+07	9.42678e+06	1.15129e+07	1.13987e+07	20.9	9.41692e+06	9.65263e+06	19.5	1.22	0.29	0.0379176	1.42	0.297283	1.284	480.838	80.4	1.3	Up
M481T85_2	M481T85_2	8.23266e+06	7.64199e+06	8.52605e+06	8.43393e+06	1.01867e+07	9.4668e+06	9.07062e+06	9.12232e+06	1.22849e+07	1.03419e+07	1.71015e+07	9.02318e+06	8.90427e+06	1.23137e+07	1.11671e+07	1.21915e+07	8.83513e+06	8.79834e+06	8.98	1.1666e+07	1.16793e+07	22.27	0.76	-0.4	0.0104118	1.98	0.169968	1.91671	481.101	84.9	1.4	Down
M482T100	M482T100	3.32121e+06	3.57455e+06	2.91449e+06	4.01917e+06	3.60147e+06	2.9999e+06	3.1338e+06	3.93611e+06	1.91153e+06	2.51915e+06	2.55735e+06	2.04996e+06	3.17171e+06	2.56385e+06	2.53643e+06	2.00374e+06	3.43759e+06	3.44788e+06	12.06	2.41421e+06	2.52779e+06	17.12	1.42	0.51	0.0010878	2.96	0.0833774	2.36427	481.954	99.7	1.7	Up
M482T108	M482T108	2.65713e+06	2.13152e+06	3.30619e+06	2.49841e+06	788866	2.45931e+06	2.20318e+06	2.17942e+06	2.07821e+06	1.30282e+06	1.57839e+06	1.38596e+06	1.51478e+06	1.62718e+06	1.57281e+06	1.91135e+06	2.278e+06	2.33124e+06	31.2	1.62144e+06	1.5756e+06	15.9	1.4	0.49	0.0104118	1.98	0.169968	1.25862	481.954	108.4	1.8	Up
M482T140	M482T140	41018.3	69664	49857.5	61829.3	50083.2	58908.7	90334.8	90105.9	25845.1	56886.9	30818.7	26337.5	31610.4	42114	39682.2	46069.2	63975.2	60369	28.7	37420.5	35646.3	28.84	1.71	0.77	0.0029526	2.53	0.116769	2.14878	482.159	139.9	2.3	Up
M482T356	M482T356	2.10961e+06	491900	1.98139e+06	753012	1.24312e+06	151475	162804	933072	1.44057e+06	1.31592e+06	3.24868e+06	2.11819e+06	1.25735e+06	964191	2.24376e+06	2.18101e+06	978299	843042	77.21	1.84621e+06	1.77938e+06	40.33	0.53	-0.92	0.014763	1.83	0.200021	1.65941	482.148	356.4	5.9	Down
M482T86	M482T86	6.77761e+06	9.08652e+06	1.44594e+07	1.20304e+07	1.04712e+07	1.13246e+07	1.27584e+07	1.21489e+07	498736	1.13211e+07	619636	319663	265459	7.41776e+06	7.37891e+06	6.59577e+06	1.11321e+07	1.16775e+07	21.25	4.30213e+06	3.6077e+06	101.65	2.59	1.37	0.0029526	2.53	0.116769	1.88557	482.052	85.9	1.4	Up
M483T356_1	M483T356_1	2.27312e+07	1.66733e+07	2.38457e+07	1.68158e+07	1.55314e+07	1.46575e+07	1.85995e+07	2.07382e+07	1.3089e+07	6.55741e+06	1.55759e+07	1.875e+07	1.3711e+07	1.56651e+07	1.53155e+07	1.43701e+07	1.86991e+07	1.77077e+07	18.18	1.41293e+07	1.48428e+07	24.79	1.32	0.4	0.0206682	1.68	0.228643	1.5489	483.14	356.4	5.9	Up
M483T80	M483T80	689872	874937	696566	815564	888436	794117	790056	625530	828015	923896	1.16027e+06	896357	1.00825e+06	631517	865781	1.35831e+06	771885	792087	12.07	959049	910127	23	0.8	-0.31	0.0281274	1.55	0.261699	1.45724	482.831	80.1	1.3	Down
M483T81	M483T81	5.4085e+06	6.46774e+06	8.95335e+06	6.47349e+06	6.1127e+06	8.6564e+06	6.47871e+06	5.35994e+06	1.5619e+07	4.7704e+06	1.45828e+07	1.27643e+07	1.50489e+07	1.41647e+07	1.01509e+07	2.41449e+07	6.73885e+06	6.47061e+06	20.11	1.39057e+07	1.43737e+07	39.24	0.48	-1.05	0.0104118	1.98	0.169968	2.06004	483.074	80.9	1.3	Down
M484T352	M484T352	676421	995161	624253	611346	876217	745798	793572	886642	247080	737888	364723	383059	320816	43857.4	597689	691198	776176	769685	17.66	423289	373891	55.89	1.83	0.87	0.004662	2.33	0.129379	1.66343	484.038	351.9	5.9	Up
M484T780	M484T780	1.78517e+06	2.19547e+06	1.96335e+06	1.94107e+06	1.10804e+06	1.51924e+06	560543	1.05921e+06	580249	1.19858e+06	348257	1.39862e+06	440705	408237	403661	1.39668e+06	1.51651e+06	1.65221e+06	36.99	771874	510477	61.14	1.96	0.97	0.0206682	1.68	0.228643	1.78438	484.361	779.6	13	Up
M485T380_1	M485T380_1	7.18579e+06	2.47468e+06	9.41177e+06	1.13233e+07	1.03933e+07	1.09092e+07	1.17703e+07	7.15583e+06	9.85157e+06	5.69465e+06	628867	4.00561e+06	6.26333e+06	9.50327e+06	3.07128e+06	5.17379e+06	8.82802e+06	9.90255e+06	35.27	5.52405e+06	5.43422e+06	56.23	1.6	0.68	0.0498834	1.3	0.330421	1.22162	485.341	380.5	6.3	Up
M485T548_1	M485T548_1	1.18688e+06	773013	1.00186e+06	455571	1.37657e+06	1.48217e+06	971083	1.2154e+06	672181	544473	671833	974978	744936	855359	237205	731582	1.05782e+06	1.09437e+06	31.51	679068	701882	32.42	1.56	0.64	0.0206682	1.68	0.228643	1.48593	485.174	547.8	9.1	Up
M485T548_2	M485T548_2	181229	192465	168603	238824	282445	307726	150645	301251	296146	336250	208170	441466	297838	407356	282125	537997	227898	215644	27.64	350918	317044	29.99	0.65	-0.62	0.0281274	1.55	0.261699	1.79263	485.187	547.7	9.1	Down
M485T766_2	M485T766_2	1.17898e+08	2.32888e+08	5.60773e+08	1.45377e+08	4.11686e+08	3.05874e+08	1.26332e+08	5.44522e+08	4.67728e+08	3.58373e+08	5.63671e+08	6.68464e+08	7.37255e+08	1.47073e+08	6.32169e+08	3.10862e+08	3.05669e+08	2.69381e+08	59.53	4.85699e+08	5.15699e+08	41.62	0.63	-0.67	0.0498834	1.3	0.330421	1.2684	485.284	766.5	12.8	Down
M486T121	M486T121	8.47864e+06	1.05674e+07	1.05997e+07	1.34961e+07	1.24757e+07	1.04787e+07	1.66217e+07	1.33952e+07	8.42301e+06	8.98892e+06	9.65989e+06	8.40082e+06	5.69744e+06	8.23857e+06	6.85281e+06	8.10048e+06	1.20142e+07	1.15377e+07	20.99	8.04524e+06	8.3197e+06	15.4	1.49	0.58	0.000621601	3.21	0.069967	2.27867	486.095	121.5	2	Up
M486T381	M486T381	3.33135e+07	1.34174e+08	6.85457e+07	1.10968e+08	3.95754e+07	4.95511e+07	4.92953e+07	4.67256e+07	2.73778e+07	2.10997e+07	3.02103e+07	2.94576e+07	2.64671e+07	6.46635e+07	6.55681e+07	1.4993e+07	6.65186e+07	4.94232e+07	54.98	3.49797e+07	2.84177e+07	55.02	1.9	0.93	0.0206682	1.68	0.228643	1.73037	486.368	380.5	6.3	Up
M486T696_2	M486T696_2	5.24891e+06	6.36848e+06	4.36012e+06	7.28591e+06	5.00673e+06	4.25689e+06	5.29656e+06	3.13803e+06	2.90238e+06	2.71209e+06	2.24745e+06	2.53136e+06	4.17379e+06	3.88716e+06	2.97249e+06	6.78346e+06	5.1202e+06	5.12782e+06	25.1	3.52627e+06	2.93744e+06	41.71	1.45	0.54	0.014763	1.83	0.200021	1.69698	486.321	696.1	11.6	Up
M486T802	M486T802	2.10884e+06	1.11858e+06	759526	905874	2.10616e+06	1.06183e+06	1.00585e+06	994576	2.44569e+06	1.21902e+06	2.23822e+06	1.69556e+06	2.53568e+06	1.92434e+06	2.08691e+06	1.01404e+06	1.25765e+06	1.03384e+06	42.57	1.89493e+06	2.00563e+06	29.19	0.66	-0.59	0.0379176	1.42	0.297283	1.67881	486.277	802.1	13.4	Down
M486T814	M486T814	4.06863e+06	3.81495e+06	5.00445e+06	5.43171e+06	3.41165e+06	4.29392e+06	1.10816e+06	3.36251e+06	3.30212e+06	1.14516e+06	2.27448e+06	3.71072e+06	2.29383e+06	468841	3.67122e+06	1.02565e+06	3.812e+06	3.94179e+06	34.37	2.2365e+06	2.28416e+06	56.44	1.7	0.77	0.0206682	1.68	0.228643	1.41985	486.284	814.4	13.6	Up
M487T118_4	M487T118_4	3.02621e+06	2.05988e+06	3.44869e+06	4.09738e+06	3.29201e+06	6.05383e+06	3.32734e+06	2.81435e+06	6.97228e+06	2.93946e+06	5.14457e+06	7.7057e+06	6.34576e+06	3.50354e+06	3.95261e+06	3.8791e+06	3.51496e+06	3.30967e+06	33.53	5.05538e+06	4.54859e+06	34.95	0.7	-0.52	0.0498834	1.3	0.330421	1.43015	487.201	118	2	Down
M487T347_2	M487T347_2	189227	429355	381486	377148	15958.8	236629	286940	291617	149989	45991.1	118972	177782	203544	157649	32282.1	167479	276045	289278	47.81	131711	153819	47.12	2.1	1.07	0.014763	1.83	0.200021	1.0614	487.26	347.1	5.8	Up
M487T380	M487T380	1.00719e+07	6.77448e+06	8.73481e+06	1.53371e+07	1.17159e+07	1.4799e+07	9.12768e+06	8.85172e+06	6.23922e+06	6.57414e+06	3.98433e+06	4.16416e+06	2.74279e+06	4.28902e+06	6.14488e+06	2.92407e+06	1.06766e+07	9.59979e+06	28.52	4.63283e+06	4.22659e+06	32.52	2.3	1.2	0.0001554	3.81	0.0532196	2.4558	487.36	380.5	6.3	Up
M487T767	M487T767	1.13599e+07	6.37768e+06	2.0691e+07	1.58078e+07	6.87883e+07	1.38787e+07	1.85148e+07	7.53972e+06	3.80468e+07	4.98963e+07	6.4714e+07	3.15647e+07	2.35241e+07	1.41307e+07	2.21907e+07	4.74832e+07	2.03697e+07	1.48433e+07	99.1	3.64438e+07	3.48058e+07	46.34	0.56	-0.84	0.0281274	1.55	0.261699	1.59316	487.297	766.7	12.8	Down
M488T118_1	M488T118_1	3.67734e+07	2.96038e+07	3.14721e+07	4.66313e+07	2.59396e+07	3.52084e+07	2.46922e+07	3.20888e+07	6.8753e+07	3.39792e+07	3.16247e+07	3.92947e+07	3.98846e+07	5.89577e+07	4.12711e+07	4.45478e+07	3.28012e+07	3.17804e+07	21.19	4.47891e+07	4.05778e+07	28.39	0.73	-0.45	0.0281274	1.55	0.261699	1.64743	488.181	118	2	Down
M488T300	M488T300	301391	83502.5	273151	229956	74423.7	71280.6	339717	317266	372804	406302	622188	80955.4	416412	360253	334471	758052	211336	251554	55.03	418930	389553	48.03	0.5	-0.99	0.00699301	2.16	0.14968	1.47808	488.066	299.7	5	Down
M488T696	M488T696	3.51315e+06	5.63588e+06	3.87027e+06	5.55368e+06	6.72304e+06	3.67733e+06	5.01922e+06	4.95514e+06	2.51375e+06	2.36983e+06	1.84533e+06	4.18229e+06	1.26655e+06	4.67857e+06	1.30916e+06	1.89802e+06	4.86847e+06	4987183	23	2.50794e+06	2.13392e+06	50.71	1.94	0.96	0.004662	2.33	0.129379	2.18996	488.307	696	11.6	Up
M489T100	M489T100	920946	1.15501e+06	884025	973090	654212	1.26591e+06	915957	853392	988749	867793	1.29154e+06	1.04666e+06	1.18439e+06	1.36713e+06	1.05106e+06	1.33159e+06	952818	918452	19.65	1.14111e+06	1.11772e+06	15.77	0.83	-0.26	0.0498834	1.3	0.330421	1.3954	488.968	99.8	1.7	Down
M489T801	M489T801	2.96915e+07	1.81585e+07	5.34521e+07	4.54761e+07	3.08322e+07	3.54552e+07	2.3244e+07	2.05072e+07	2.94949e+07	1.55697e+07	2.24708e+07	2.43332e+07	8.68434e+06	7.22113e+06	1.72754e+07	6.19926e+06	3.21021e+07	3.02618e+07	38.35	1.64061e+07	1.64226e+07	52.56	1.96	0.97	0.0104118	1.98	0.169968	1.86659	489.315	801.5	13.4	Up
M490T553	M490T553	152030	190139	110940	68148.3	119908	224173	206350	196162	275573	342214	194044	234527	282369	167196	166492	334703	158481	171085	34.54	249640	255050	28.15	0.63	-0.66	0.0281274	1.55	0.261699	1.76962	490.22	552.8	9.2	Down
M490T91	M490T91	1.08914e+06	1.36771e+06	1.35642e+06	1.55061e+06	1.37064e+06	1.42538e+06	1.53034e+06	1.45209e+06	1.26829e+06	933514	1.11002e+06	973448	1.22874e+06	1.26098e+06	1.36896e+06	1.20543e+06	1.39279e+06	1.39801e+06	10.26	1.16867e+06	1.21708e+06	12.95	1.19	0.25	0.0104118	1.98	0.169968	1.87514	490.175	90.9	1.5	Up
M491T100	M491T100	2.30974e+06	2.91522e+06	1.98735e+06	2.35621e+06	2.43196e+06	2.25062e+06	3.34411e+06	3.13035e+06	928807	2.79433e+06	899406	605046	1.14509e+06	2.20654e+06	2.39476e+06	2.27973e+06	2.59069e+06	2.39409e+06	18.47	1.65671e+06	1.67582e+06	51.02	1.56	0.65	0.0379176	1.42	0.297283	1.70087	490.963	99.7	1.7	Up
M491T82_3	M491T82_3	1.48229e+06	1.29012e+06	1.66385e+06	1.35499e+06	1.64541e+06	1.39268e+06	1.43586e+06	1.41257e+06	2.1264e+06	1.73669e+06	2.19917e+06	2.231e+06	1.77224e+06	1.61082e+06	1.14381e+06	1.94764e+06	1.45972e+06	1.42421e+06	9.11	1.84597e+06	1.85994e+06	19.72	0.79	-0.34	0.0206682	1.68	0.228643	1.67942	490.813	81.6	1.4	Down
M492T115	M492T115	677151	1.20165e+06	949188	963320	1.29336e+06	1.27163e+06	1.6707e+06	1.73825e+06	246872	1.16704e+06	312713	95646.9	170265	295537	543862	302179	1.22066e+06	1.23664e+06	29.6	391764	298858	86.59	3.12	1.64	0.0010878	2.96	0.0833774	2.33156	491.99	114.7	1.9	Up
M492T811_2	M492T811_2	1.04421e+07	7.92338e+06	6.7512e+06	7.38607e+06	1.27884e+07	8.44297e+06	6.74943e+06	7.24844e+06	1.53027e+06	1.73526e+06	6.10827e+06	8.57137e+06	2.24099e+06	8.53894e+06	6.65049e+06	1.35743e+06	8.4665e+06	7.65473e+06	25.02	4.59163e+06	4.17463e+06	69.59	1.84	0.88	0.0379176	1.42	0.297283	1.79124	492.373	810.7	13.5	Up
M494T138	M494T138	2.30952e+06	987959	1.83785e+06	1.18126e+06	3.2989e+06	645794	1.19641e+06	1.07231e+06	3.28119e+06	2.7233e+06	4.62294e+06	2.14677e+06	1.95655e+06	1.15994e+06	3.13848e+06	2.60094e+06	1.56625e+06	1.18884e+06	55.76	2.70377e+06	2.66212e+06	38.2	0.58	-0.79	0.0498834	1.3	0.330421	1.72203	494.07	138.2	2.3	Down
M494T356	M494T356	1.36145e+06	1.85699e+06	2.16304e+06	1.46453e+06	2.52035e+06	1.80749e+06	1.87549e+06	1.93765e+06	498709	2.0761e+06	799973	449034	169122	1.5318e+06	1.12928e+06	941406	1.87337e+06	1.86624e+06	19.57	949428	870690	65.72	1.97	0.98	0.0104118	1.98	0.169968	1.89009	494.149	356.4	5.9	Up
M494T540	M494T540	135270	165592	255997	140074	175601	114458	106443	130494	176586	369633	465287	370874	305084	142926	173700	247773	152991	137672	31.17	281483	276428	40.96	0.54	-0.88	0.00699301	2.16	0.14968	1.89887	493.8	540	9	Down
M494T596_2	M494T596_2	383260	338001	713635	498113	283816	536382	353757	518997	387815	396384	394129	235037	320082	186350	154363	180687	453245	440686	30.96	281856	277559	37.02	1.61	0.69	0.0498834	1.3	0.330421	1.81034	493.655	595.6	9.9	Up
M494T806_3	M494T806_3	1.85429e+07	3.36755e+06	1.14959e+07	1.67602e+07	2.04872e+07	1.61272e+07	1.4325e+07	1.7011e+07	927182	579678	2.38658e+06	1.03689e+07	1.45789e+06	2.41481e+07	1.44322e+07	203964	1.47646e+07	1.64437e+07	36.08	6.81307e+06	1.92224e+06	128.52	2.17	1.12	0.0379176	1.42	0.297283	1.71105	494.337	806.5	13.4	Up
M494T818_1	M494T818_1	2.70141e+08	4.59215e+08	5.07498e+08	2.37788e+08	1.85327e+08	2.60121e+08	2.07844e+08	2.34633e+08	1.61615e+08	2.85858e+08	4.97673e+07	3.20319e+08	1.13634e+08	1.09882e+08	2.96772e+07	6.35809e+07	2.95321e+08	2.48954e+08	40.57	1.41792e+08	1.11758e+08	76.33	2.08	1.06	0.0379176	1.42	0.297283	1.83802	494.307	817.9	13.6	Up
M494T818_2	M494T818_2	1.5285e+09	2.22355e+09	1.22315e+09	1.19065e+09	1.66015e+09	4.04252e+09	2.64943e+09	2.41384e+09	4.87139e+09	6.96668e+09	2.73447e+09	2.56719e+09	4.89897e+09	1.8345e+09	2.51007e+09	7.32589e+09	2.11647e+09	1.94185e+09	44.83	4.21364e+09	3.80293e+09	50.45	0.5	-0.99	0.014763	1.83	0.200021	1.75085	494.321	817.9	13.6	Down
M495T137	M495T137	365449	289459	324999	273564	522734	312436	312457	369452	1.26376e+06	1.05164e+06	1.6131e+06	721144	786321	255341	796147	926749	346319	318728	22.71	926774	861448	43.35	0.37	-1.42	0.0104118	1.98	0.169968	2.24809	495.07	137.2	2.3	Down
M495T305	M495T305	753829	511423	195620	584090	830859	512761	220666	45954.2	27437.1	178312	39109.6	49811.9	147472	33257	334775	21681	456900	512092	60.97	103982	44460.7	106.26	4.39	2.14	0.004662	2.33	0.129379	1.93496	495.07	305.1	5.1	Up
M495T707_1	M495T707_1	5.7945e+06	4.81901e+06	5.03803e+06	1.39846e+06	3.91218e+06	1.15657e+06	2.58356e+06	2.58539e+06	6.02536e+06	1.29163e+07	1.93735e+07	7.46572e+06	1.29255e+07	1.08835e+06	8.57502e+06	1.02746e+07	3.41096e+06	3.24878e+06	50.85	9.83054e+06	9.42483e+06	55.51	0.35	-1.53	0.0104118	1.98	0.169968	1.73675	494.68	707	11.8	Down
M495T707_2	M495T707_2	2.15988e+06	1.87064e+06	3.60633e+06	560706	1.68632e+06	465249	2.49504e+06	1.03825e+06	2.58886e+06	5.88887e+06	7.82977e+06	3.75188e+06	5.27982e+06	437427	3.17579e+06	4.31175e+06	1.7353e+06	1.77848e+06	60.66	4.15802e+06	4.03181e+06	53.93	0.42	-1.26	0.0206682	1.68	0.228643	1.49005	494.693	707	11.8	Down
M495T78	M495T78	1.93222e+06	2.38714e+06	1.8937e+06	1.86223e+06	1.77162e+06	2.7244e+06	1.98226e+06	1.96028e+06	2.36834e+06	2.5562e+06	2.14749e+06	2.16411e+06	2.57396e+06	2.36411e+06	2.33053e+06	2.78576e+06	2.06423e+06	1.94625e+06	15.65	2.41131e+06	2.36622e+06	8.99	0.86	-0.22	0.0379176	1.42	0.297283	1.7183	495.143	77.6	1.3	Down
M495T86_1	M495T86_1	4.40148e+06	5.06878e+06	4.88176e+06	5.00548e+06	6.7462e+06	3.8954e+06	4.33509e+06	4.57525e+06	6.16635e+06	8.25165e+06	8.26456e+06	5.44466e+06	4.95297e+06	4.44826e+06	6.12527e+06	5.99951e+06	4.86368e+06	4.72851e+06	17.58	6.20665e+06	6.06239e+06	22.55	0.78	-0.35	0.0379176	1.42	0.297283	1.59102	495.08	86.1	1.4	Down
M496T85	M496T85	4.22046e+06	2.06537e+06	2.96684e+06	1.58095e+06	3.55731e+06	6.42044e+06	4.36468e+06	3.76883e+06	1.32739e+06	2.14797e+06	1.56596e+06	1.57605e+06	3.70365e+06	1.62784e+06	1.40053e+06	1.71869e+06	3.61811e+06	3.66307e+06	41.5	1.88351e+06	1.60194e+06	41.19	1.92	0.94	0.0104118	1.98	0.169968	1.8726	496.014	84.8	1.4	Up
M496T87	M496T87	1.12139e+06	1.16683e+06	1.22903e+06	1.19124e+06	1.15242e+06	1.0375e+06	1.14457e+06	1.26028e+06	1.27147e+06	1.26696e+06	1.41889e+06	1.27823e+06	1.13926e+06	1.23226e+06	1.29008e+06	1.18143e+06	1.16291e+06	1.15962e+06	5.87	1.25982e+06	1.26921e+06	6.59	0.92	-0.12	0.0206682	1.68	0.228643	1.63348	496.11	86.6	1.4	Down
M496T88_2	M496T88_2	916166	857491	922174	884842	621757	646698	836689	893252	1.04286e+06	1.04815e+06	1.03114e+06	1.10095e+06	1.03337e+06	1.10531e+06	1.19524e+06	1.11666e+06	822384	871167	14.55	1.08421e+06	1.07455e+06	5.23	0.76	-0.4	0.0001554	3.81	0.0532196	2.36373	496.079	87.6	1.5	Down
M497T471	M497T471	48262.3	22930.8	113638	13157.7	79431	78576.7	15852.5	16100.1	169015	169670	210518	234897	46234.7	25814.8	104912	151112	48493.6	35596.5	78.42	139022	160063	53.61	0.35	-1.52	0.014763	1.83	0.200021	1.81065	497.233	470.6	7.8	Down
M497T81_1	M497T81_1	1.44909e+07	1.58161e+07	1.57195e+07	1.56795e+07	1.32112e+07	1.80632e+07	1.37387e+07	1.43054e+07	1.04929e+07	1.13805e+07	1.12868e+07	1.25311e+07	1.09455e+07	9.6782e+06	1.02532e+07	1.29364e+07	1.51281e+07	1.50852e+07	10.13	1.11881e+07	1.11162e+07	9.91	1.35	0.44	0.0001554	3.81	0.0532196	2.5424	496.804	80.7	1.3	Up
M497T81_2	M497T81_2	6.18894e+06	8.77097e+06	6.42458e+06	7.73448e+06	7.47121e+06	9.74725e+06	8.19521e+06	8.19664e+06	5.11426e+06	6.15997e+06	4.92656e+06	6.89185e+06	4.82666e+06	4.63293e+06	4.03201e+06	7.6744e+06	7.84116e+06	7.96485e+06	14.96	5.53233e+06	5.02041e+06	22.59	1.42	0.5	0.0029526	2.53	0.116769	2.17148	496.817	80.7	1.3	Up
M497T818	M497T818	1.17435e+07	2.40439e+07	1.19409e+07	3.40951e+06	1.17973e+07	2.86658e+07	2.0386e+07	2.13882e+07	3.29599e+07	2.47685e+07	2.25663e+07	2.14012e+07	3.35277e+07	1.61393e+07	1.82656e+07	4.08473e+07	1.66719e+07	1.61635e+07	49.7	2.63095e+07	2.36674e+07	32.64	0.63	-0.66	0.0498834	1.3	0.330421	1.49752	497.332	817.8	13.6	Down
M497T87	M497T87	872242	1.44562e+06	3.71623e+06	2.79602e+06	1.64103e+06	1.3896e+06	2.99028e+06	1.20087e+06	565562	1.20809e+06	710215	787404	889332	871768	919607	1.0653e+06	2.00648e+06	1.54332e+06	50.82	877159	880550	22.8	2.29	1.19	0.0029526	2.53	0.116769	2.1361	497.103	86.5	1.4	Up
M498T350_1	M498T350_1	213648	1.25418e+06	239390	865074	1.76368e+06	372124	1.26795e+06	432969	762499	2.81901e+06	2.5453e+06	1.35769e+06	1.79388e+06	1.16551e+06	1.56729e+06	568277	801126	649022	72.08	1.57243e+06	1.46249e+06	50.57	0.51	-0.97	0.0498834	1.3	0.330421	1.50656	497.742	350.4	5.8	Down
M498T351	M498T351	537568	932234	673952	1.07527e+06	808802	750180	931302	1.00244e+06	72583.4	771136	773115	639842	651920	495948	543773	587439	838968	870052	21.45	566969	613640	39.28	1.48	0.57	0.0206682	1.68	0.228643	1.35605	498.246	350.5	5.8	Up
M498T428_1	M498T428_1	523149	806376	617364	366343	752758	332280	697102	271412	266594	332032	199433	296368	133114	168660	557007	253870	545848	570257	37.44	275885	260232	47.64	1.98	0.98	0.004662	2.33	0.129379	1.91672	497.916	428.4	7.1	Up
M498T445_2	M498T445_2	1.33011e+06	732446	846794	1.56615e+06	1.38587e+06	680292	775778	796194	527673	420392	608586	772743	488657	924407	950437	242448	1.0142e+06	821494	34.68	616918	568129	40.33	1.64	0.72	0.0379176	1.42	0.297283	1.70605	498.252	444.9	7.4	Up
M499T109_2	M499T109_2	509658	288833	603237	2.09079e+06	2.36853e+06	447664	531771	369740	3.22878e+06	3.15217e+06	3.61851e+06	2.67203e+06	612397	2.30141e+06	2.31745e+06	1.2505e+06	901277	520714	91.97	2.39416e+06	2.49474e+06	42.78	0.38	-1.41	0.004662	2.33	0.129379	1.92388	499.125	109.3	1.8	Down
M499T111	M499T111	525377	348812	457425	478869	452738	402603	317417	458246	671720	646968	842682	644611	506233	442341	473495	488708	430186	455082	16.1	589595	575422	23.06	0.73	-0.45	0.014763	1.83	0.200021	1.88896	499.306	111.3	1.9	Down
M499T254	M499T254	1.50677e+06	167309	261228	247919	1.64421e+06	62477.5	606155	183496	2.37135e+06	1.59423e+06	4.77507e+06	1.74368e+06	1.22567e+06	171269	1.76919e+06	1.65565e+06	584945	254574	108.11	1.91326e+06	1.69967e+06	68.79	0.31	-1.71	0.014763	1.83	0.200021	1.80808	499.077	254.4	4.2	Down
M499T310_1	M499T310_1	5.08853e+06	5.70242e+06	5.36383e+06	3.80071e+06	5.20675e+06	7.20514e+06	7.02419e+06	5.81905e+06	7.60111e+06	9.03036e+06	6.81704e+06	7.3399e+06	8.24843e+06	6.48443e+06	5.49497e+06	7.52616e+06	5.65133e+06	5.53313e+06	19.33	7.3178e+06	7.43303e+06	14.78	0.77	-0.37	0.0104118	1.98	0.169968	1.85309	499.11	310.5	5.2	Down
M499T310_2	M499T310_2	7.92717e+06	2.17192e+07	6.55628e+06	7.44744e+06	1.26765e+07	1.51088e+07	1.53997e+07	1.44409e+07	8.32094e+06	8.72266e+06	9.82892e+06	5.39479e+06	8.89181e+06	5.89164e+06	5.27037e+06	6.53778e+06	1.26595e+07	1.35587e+07	40.67	7.35737e+06	7.42936e+06	24.25	1.72	0.78	0.0379176	1.42	0.297283	1.81862	499.122	310.4	5.2	Up
M499T445_1	M499T445_1	435412	175084	264492	226135	387742	185405	115422	138293	309050	606981	628882	385004	369889	192243	332835	498153	240998	205770	48.05	415380	377447	36.4	0.58	-0.79	0.0379176	1.42	0.297283	1.78028	498.508	445	7.4	Down
M500T804_1	M500T804_1	2.61965e+07	6.44313e+06	1.14132e+07	3.72561e+07	2.52599e+07	5.49877e+06	1.34109e+07	1.34326e+07	1.28994e+06	807245	3.96603e+06	4.92622e+06	1.93451e+06	2.25652e+07	2.13739e+07	685628	1.73639e+07	1.34217e+07	63.93	7.19358e+06	2.95027e+06	128.55	2.41	1.27	0.0206682	1.68	0.228643	1.74243	500.265	803.9	13.4	Up
M501T114	M501T114	982328	946027	1.13794e+06	994108	852536	817607	953137	1.07755e+06	1.01848e+06	1.30023e+06	1.13574e+06	991506	1.08086e+06	1.25175e+06	1.03329e+06	984803	970155	967733	10.91	1.09958e+06	1.05707e+06	10.92	0.88	-0.18	0.0379176	1.42	0.297283	1.57265	500.904	114.3	1.9	Down
M501T85_2	M501T85_2	1.08589e+08	5.95612e+07	9.6023e+07	9.69604e+07	7.98823e+07	6.06765e+07	7.9996e+07	2.71242e+07	1.06018e+08	9.93622e+07	1.7248e+08	1.30058e+08	9.99584e+07	8.65794e+07	1.26075e+08	1.06235e+08	7.61016e+07	7.99392e+07	34.51	1.15846e+08	1.06126e+08	23.26	0.66	-0.61	0.00699301	2.16	0.14968	1.7642	501.072	85.4	1.4	Down
M502T703	M502T703	158914	86907	120231	215222	157525	84021.1	107215	105720	14946.9	13277.7	60529.7	84308.9	54512.8	155964	139078	6013.97	129469	113723	34.58	66079	57521.2	86.59	1.96	0.97	0.0281274	1.55	0.261699	1.65973	502.215	702.8	11.7	Up
M502T822	M502T822	5.78333e+07	4.19326e+07	1.37375e+08	7.63798e+07	1.02284e+08	3.21847e+07	6.57103e+07	4.25752e+07	8.53946e+07	1.44641e+08	1.44008e+08	6.66762e+07	7.39976e+07	5.88984e+07	1.50648e+08	1.42514e+08	6.95344e+07	6.17718e+07	50.87	1.08347e+08	1.13955e+08	37.3	0.64	-0.64	0.0379176	1.42	0.297283	1.49881	502.313	821.9	13.7	Down
M502T85_1	M502T85_1	1.13083e+07	1.04769e+07	1.38806e+07	1.09475e+07	1.03884e+07	8.07763e+06	1.03727e+07	9.83753e+06	1.55734e+07	1.61234e+07	2.10793e+07	1.99112e+07	1.26762e+07	1.03954e+07	1.34737e+07	1.47054e+07	1.06612e+07	1.04327e+07	15.21	1.54922e+07	1.51394e+07	23.11	0.69	-0.54	0.004662	2.33	0.129379	2.07676	502.063	85.4	1.4	Down
M504T77	M504T77	662678	827319	902383	885768	1.04206e+06	741614	981349	951526	565978	802319	825365	774634	625370	741734	688282	735895	874337	894075	14.41	719947	738815	12.34	1.21	0.28	0.0206682	1.68	0.228643	1.81248	504.102	76.9	1.3	Up
M505T795_1	M505T795_1	1.05565e+07	7.15852e+06	7.68073e+06	7.28766e+06	8.77827e+06	8.76448e+06	7.81181e+06	1.20509e+07	5.14438e+06	6.42246e+06	5.82847e+06	3.74588e+06	3.22576e+06	1.10972e+07	9.59864e+06	3.02523e+06	8.7611e+06	8.28815e+06	19.7	6.011e+06	5.48643e+06	49.31	1.46	0.54	0.0498834	1.3	0.330421	1.63312	505.406	795.2	13.3	Up
M506T368	M506T368	258436	886380	382320	471142	620246	495564	667768	493161	206892	259251	243566	306756	331548	482184	322567	267778	534377	494362	35.75	302568	287267	27.72	1.77	0.82	0.0104118	1.98	0.169968	2.04532	506.167	368.5	6.1	Up
M507T693	M507T693	302261	91327.7	206195	226015	192081	202440	187290	83267.8	56867.4	47938.9	145767	99125.2	51749.9	158252	296017	22678.5	186360	197261	38.13	109800	77996.3	81.47	1.7	0.76	0.0498834	1.3	0.330421	1.4803	507.252	692.6	11.5	Up
M507T769_1	M507T769_1	2.72597e+07	2.02361e+07	1.38683e+07	3.02779e+07	1.66179e+07	1.21606e+07	1.53474e+07	1.36812e+07	1.0134e+07	7.55638e+06	1.00808e+07	1.13243e+07	1.2239e+07	1.50699e+07	1.33351e+07	8.18631e+06	1.86811e+07	1.59826e+07	36	1.09907e+07	1.07291e+07	23.08	1.7	0.77	0.0029526	2.53	0.116769	1.99886	507.252	769.3	12.8	Up
M508T826_2	M508T826_2	1.37448e+07	1.06664e+07	5.78996e+06	1.29752e+07	1.84665e+07	1.04845e+07	1.43491e+07	5.96539e+06	2.555e+06	5.68229e+06	1.14265e+07	5.10595e+06	1.07713e+07	7.04841e+06	6.77411e+06	1.52407e+06	1.15552e+07	1.18208e+07	37.12	6.36095e+06	6.2282e+06	55	1.82	0.86	0.0379176	1.42	0.297283	1.62224	508.288	825.6	13.8	Up
M509T433_1	M509T433_1	592131	400993	466690	504136	624484	516793	492110	436891	284190	396447	276117	315281	312477	398705	446178	505447	504278	498123	14.82	366855	355864	22.59	1.37	0.46	0.00699301	2.16	0.14968	1.98052	508.605	433.4	7.2	Up
M509T85_1	M509T85_1	3.85965e+07	2.06774e+07	1.79267e+07	2.72557e+07	6.74656e+07	3.88854e+07	3.49837e+07	4.36158e+07	1.65616e+07	6.37453e+07	9.24197e+06	1.35371e+07	1.84291e+07	3.2271e+07	2.2059e+07	1.72697e+07	3.61759e+07	3.67901e+07	43.1	2.41394e+07	1.78494e+07	71.93	1.5	0.58	0.0498834	1.3	0.330421	1.3311	509.071	85.3	1.4	Up
M511T85_2	M511T85_2	1.28986e+06	1.13099e+06	7.4688e+06	7.62838e+06	7.38118e+06	1.33008e+06	1.09451e+07	7.26836e+06	1.10369e+07	1.19784e+07	2.44437e+06	1.02617e+07	1.33538e+07	9.6639e+06	8.95225e+06	8.11805e+06	5.55534e+06	7.32477e+06	67.66	9.47618e+06	9.96281e+06	34.76	0.59	-0.77	0.014763	1.83	0.200021	1.33211	511.092	85.3	1.4	Down
M512T300	M512T300	1.2846e+06	1.26897e+06	1.23695e+06	1.56024e+06	1.78566e+06	1.7055e+06	1.6018e+06	1.6901e+06	940260	1.83202e+06	1.15668e+06	570086	764000	1.08803e+06	1.15097e+06	1.30923e+06	1.51673e+06	1.58102e+06	14.55	1.10141e+06	1.1195e+06	34.4	1.38	0.46	0.0281274	1.55	0.261699	1.74263	511.586	300.1	5	Up
M513T535_2	M513T535_2	731984	354342	739687	684087	711499	438898	935044	612935	660289	654037	566970	311423	283470	564797	640366	336342	651060	697793	28.1	502212	565883	32.54	1.3	0.37	0.0498834	1.3	0.330421	1.14493	512.83	534.6	8.9	Up
M513T78	M513T78	544163	480128	543501	660592	549474	469879	525270	507621	449193	405786	512965	487122	362868	474656	457995	360726	535079	534386	11	438914	453594	12.93	1.22	0.29	0.004662	2.33	0.129379	2.00449	512.891	78.4	1.3	Up
M513T79	M513T79	1.08823e+06	578230	888860	1.04778e+06	1.0405e+06	409199	1.74464e+06	385813	547092	323931	630333	371512	793947	370686	338196	886599	897905	964678	49.79	532787	459302	41.18	1.69	0.75	0.0281274	1.55	0.261699	1.39582	512.942	78.8	1.3	Up
M514T368_2	M514T368_2	253656	298822	337495	259339	245981	263672	190369	252878	296000	408775	314585	270861	301293	360780	300391	270340	262777	256498	16.15	315378	300842	14.97	0.83	-0.26	0.014763	1.83	0.200021	1.61581	514.26	368.5	6.1	Down
M515T80_1	M515T80_1	1.52641e+07	1.66294e+07	1.75769e+07	2.05773e+07	1.62335e+07	2.05406e+07	1.80932e+07	1.96068e+07	1.04827e+07	1.74489e+07	1.17434e+07	1.0423e+07	1.09501e+07	1.14224e+07	1.3477e+07	1.49368e+07	1.80652e+07	1.7835e+07	11.13	1.26106e+07	1.15829e+07	19.84	1.43	0.52	0.0010878	2.96	0.0833774	2.36835	514.857	79.6	1.3	Up
M515T80_3	M515T80_3	1.87234e+06	1.54755e+06	2.30463e+06	2.15019e+06	1.67751e+06	1.54418e+06	1.49033e+06	1.65095e+06	2.45036e+06	1.78548e+06	3.45773e+06	2.89084e+06	3.14129e+06	3.82664e+06	2.75148e+06	3.21248e+06	1779709	1.66423e+06	17.01	2.93954e+06	3.01607e+06	21.44	0.61	-0.72	0.0010878	2.96	0.0833774	2.33711	514.891	79.6	1.3	Down
M515T816	M515T816	915493	1.16115e+06	1.96821e+06	960816	627313	1.05965e+06	990104	694480	733549	597265	789501	947057	359521	617038	922386	452555	1.04715e+06	975460	39.38	677359	675294	31.07	1.55	0.63	0.0206682	1.68	0.228643	1.63277	515.343	816	13.6	Up
M515T89_1	M515T89_1	8.85569e+06	1.43295e+07	9.90373e+06	1.44052e+07	1.40165e+07	1.20925e+07	1.67448e+07	1.76674e+07	9.85795e+06	1.04516e+07	1.29088e+07	6.52271e+06	6.50734e+06	6.39052e+06	7.7821e+06	6.31551e+06	1.35019e+07	1.4173e+07	22.77	8.34207e+06	7.15241e+06	29.54	1.62	0.69	0.004662	2.33	0.129379	2.16782	515.091	88.7	1.5	Up
M516T643	M516T643	254740	328137	295375	251803	232584	263486	160420	139605	206932	233510	234632	147794	80267.1	174406	150772	113191	240769	253272	26.36	167688	162589	33.2	1.44	0.52	0.0379176	1.42	0.297283	1.53818	516.236	642.7	10.7	Up
M517T463	M517T463	22986.5	32567.1	17661	26808.3	36185	46917	103074	45976.3	262286	129549	280354	111858	250500	27118.8	86056.8	44047.3	41521.9	34376	64.85	148971	120704	68.07	0.28	-1.84	0.014763	1.83	0.200021	1.89325	517.16	463.1	7.7	Down
M517T85_1	M517T85_1	299300	212190	349190	325937	198932	319051	247411	155282	7.75592e+06	228017	6.26293e+06	5.71297e+06	5.39754e+06	1.98476e+06	393283	2.60339e+06	263412	273355	26.61	3.79235e+06	4.00046e+06	75.26	0.07	-3.85	0.0029526	2.53	0.116769	2.26204	517.061	84.9	1.4	Down
M519T102	M519T102	9.13027e+07	7.66575e+07	6.7549e+07	9.67634e+07	7.78309e+07	8.59596e+07	9.00095e+07	9.23484e+07	4.24324e+07	9.90351e+07	4.73845e+07	2.72825e+07	2.15309e+07	6.8776e+07	5.84314e+07	7.87373e+07	8.48026e+07	8.79846e+07	11.65	5.54513e+07	5.29079e+07	47.26	1.53	0.61	0.0379176	1.42	0.297283	1.77052	519.128	102.1	1.7	Up
M519T116	M519T116	1.35031e+08	1.20795e+08	1.37179e+08	1.30367e+08	1.12933e+08	1.15799e+08	1.11325e+08	1.10184e+08	1.39687e+08	1.2593e+08	1.3834e+08	1.41135e+08	1.24107e+08	1.40984e+08	1.18783e+08	1.28679e+08	1.21702e+08	1.18297e+08	9.03	1.32205e+08	1.3351e+08	6.69	0.92	-0.12	0.0498834	1.3	0.330421	1.48591	519.142	116.3	1.9	Down
M519T274	M519T274	4.13189e+06	2.75943e+06	4.50972e+06	4.2546e+06	1.92533e+06	3.55349e+06	3.8538e+06	3.53254e+06	761679	456513	2.28348e+06	3.23425e+06	2.59341e+06	3.47212e+06	1.86532e+06	3.11269e+06	3.5651e+06	3.70364e+06	23.97	2.22243e+06	2.43845e+06	50.73	1.6	0.68	0.0104118	1.98	0.169968	1.51806	519.162	274.3	4.6	Up
M519T399	M519T399	5.60626e+07	2.9011e+07	3.90492e+07	2.13157e+07	2.84844e+07	3.28003e+07	1.57788e+07	1.86424e+07	9.50206e+07	8.44504e+07	3.04522e+07	1.82016e+07	7.01233e+07	3.39075e+07	6.06717e+07	7.91515e+07	3.01431e+07	2.87477e+07	43.05	5.89974e+07	6.53975e+07	47.89	0.51	-0.97	0.0379176	1.42	0.297283	1.68503	519.128	398.9	6.6	Down
M519T751	M519T751	1.86719e+06	2.15826e+06	2.9164e+06	2.31477e+06	1.59096e+06	1.88337e+06	1.58541e+06	1.69853e+06	786877	1.06924e+06	973805	536633	537466	2.1334e+06	1.88148e+06	1.66458e+06	2.00186e+06	1.87528e+06	22.54	1.19793e+06	1.02152e+06	51.55	1.67	0.74	0.0281274	1.55	0.261699	1.84626	519.162	751.5	12.5	Up
M519T810_1	M519T810_1	631838	954712	1.46548e+06	776720	867575	1.06487e+06	1.07799e+06	1.22224e+06	641223	455236	848317	1.36989e+06	620921	525144	818556	657159	1.00768e+06	1.00979e+06	26.01	742055	649191	38.55	1.36	0.44	0.0498834	1.3	0.330421	1.52354	519.162	810.2	13.5	Up
M519T810_2	M519T810_2	2.73238e+06	1.13797e+07	7.35982e+06	941974	4.66571e+06	6.20654e+06	4.92232e+06	5.03971e+06	1.44416e+07	1.48945e+07	1.04083e+07	5.80124e+06	1.52398e+07	7.75897e+06	9.58508e+06	1.36553e+07	5.40602e+06	4.98101e+06	57.71	1.14731e+07	1.20318e+07	31.28	0.47	-1.09	0.004662	2.33	0.129379	1.90322	519.311	810.5	13.5	Down
M520T372	M520T372	102196	61538.8	103271	66867.2	53433.4	70821	57678.8	62877.2	293299	77093.9	246050	129659	179490	69951.7	125288	179101	72335.4	64872.2	26.94	162492	154380	48.22	0.45	-1.17	0.0029526	2.53	0.116769	2.08496	520.28	372	6.2	Down
M520T482_1	M520T482_1	581001	1.07307e+06	831359	1.43568e+06	1.57678e+06	974522	1.4192e+06	1.39791e+06	891890	812226	1.1456e+06	602321	417135	618014	617639	799541	1.16119e+06	1.23549e+06	30.16	738046	708777	30.27	1.57	0.65	0.0281274	1.55	0.261699	1.84394	520.314	481.7	8	Up
M520T824_1	M520T824_1	8.86775e+08	1.76313e+08	4.97082e+08	8.80261e+08	9.0681e+08	2.21173e+08	2.95757e+08	5.88601e+08	1.30811e+08	1.3105e+08	1.45425e+08	4.61146e+08	1.53277e+08	8.25404e+08	8.34115e+08	7.53491e+07	5.56597e+08	5.42842e+08	55.42	344571978	1.49351e+08	93.36	1.62	0.69	0.0498834	1.3	0.330421	1.21578	520.329	823.8	13.7	Up
M521T36	M521T36	6.49789e+07	5.95236e+07	6.43218e+07	6.15398e+07	6.37824e+07	5.80992e+07	5.92508e+07	6.50308e+07	4.99914e+07	5.32797e+07	5.38096e+07	6.16119e+07	4.8412e+07	6.83192e+07	5.77985e+07	4.24234e+07	6.20659e+07	6.26611e+07	4.55	5.44557e+07	5.35447e+07	14.85	1.14	0.19	0.0379176	1.42	0.297283	1.6504	521.139	36.3	0.6	Up
M521T509	M521T509	1.56227e+07	2.03888e+07	2.52403e+07	3.1265e+07	1.30202e+07	5.26624e+07	3.21154e+07	1.93532e+07	1.21843e+07	1.82895e+07	9.99272e+06	1.25833e+07	1.18026e+07	1.9201e+07	1.64459e+07	1.95154e+07	2.62085e+07	2.28145e+07	48.44	1.50018e+07	1.45146e+07	25.2	1.75	0.8	0.014763	1.83	0.200021	1.78126	521.125	508.9	8.5	Up
M521T824	M521T824	4.28171e+08	6.96152e+08	4.61325e+08	9.28522e+08	5.17569e+08	1.14176e+09	8.3121e+08	4.80858e+08	2.82691e+08	1.57442e+08	3.23793e+08	9.24081e+08	4.54765e+08	4.84613e+08	4.35454e+08	3.4416e+08	6.85696e+08	6.06861e+08	37.99	4.25875e+08	3.89807e+08	53.42	1.61	0.69	0.0281274	1.55	0.261699	1.65287	521.35	823.8	13.7	Up
M521T834_2	M521T834_2	2.77549e+09	6.09565e+08	2.48718e+09	3.55002e+09	3.75742e+09	5.66405e+08	1.90683e+09	2.07234e+09	1.28383e+08	5.72137e+07	1.99022e+08	7.8846e+08	2.19208e+08	3.51583e+09	1.35615e+09	1.59906e+08	2.21565e+09	2.27976e+09	53.84	8.03022e+08	2.09115e+08	147.32	2.76	1.46	0.0206682	1.68	0.228643	1.85074	521.34	833.6	13.9	Up
M521T834_3	M521T834_3	2.63202e+08	2.81871e+07	1.33979e+08	1.47714e+08	1.66387e+08	2.62738e+07	8.19801e+07	9.54203e+07	5.94227e+06	2.64761e+06	9.21176e+06	3.63938e+07	1.01462e+07	1.28143e+08	1.46128e+08	1.48739e+07	1.17893e+08	1.147e+08	66.37	4.41858e+07	1.251e+07	132.33	2.67	1.42	0.0281274	1.55	0.261699	1.70071	521.363	833.6	13.9	Up
M522T74	M522T74	1.4379e+06	336118	2.71398e+06	303879	1.20734e+06	2.10267e+06	1.44061e+06	2.0246e+06	3.8238e+06	402249	3.50632e+06	8.69022e+06	3.32851e+06	2.68518e+06	1.48826e+06	2.26786e+06	1.44589e+06	1.43925e+06	58.26	3.27405e+06	3.00684e+06	75.25	0.44	-1.18	0.0281274	1.55	0.261699	1.30858	522.125	74	1.2	Down
M522T86_2	M522T86_2	1.44803e+08	1.03084e+08	1.31812e+08	1.23285e+08	7.35933e+07	1.14239e+08	8.5986e+07	8.95867e+07	3.83695e+07	1.11126e+08	2.97061e+07	1.47046e+07	1.50903e+07	6.11207e+07	9.32991e+07	9.34544e+07	1.08299e+08	1.08662e+08	22.69	5.71089e+07	4.97451e+07	66.94	1.9	0.92	0.0206682	1.68	0.228643	1.78661	522.128	85.5	1.4	Up
M523T601_2	M523T601_2	500331	864018	641328	531003	991569	546706	475374	837466	475449	485198	507746	776502	379523	233915	335980	296413	673474	594017	29.22	436341	427486	38.6	1.54	0.63	0.014763	1.83	0.200021	1.78894	523.332	601	10	Up
M523T66	M523T66	7.4473e+06	1.28882e+07	1.03993e+07	1.00276e+07	1.03859e+07	1.63713e+07	1.07996e+07	1.09462e+07	1.35025e+07	1.22182e+07	1.19481e+07	2.08058e+07	2.09934e+07	1.48876e+07	1.49466e+07	1.62569e+07	1.11582e+07	1.05994e+07	23.11	1.56949e+07	1.49171e+07	22.42	0.71	-0.49	0.0104118	1.98	0.169968	1.84191	523.141	66.5	1.1	Down
M523T770	M523T770	490673	1.34999e+06	926328	1.59078e+06	2.13287e+06	837293	1.84566e+06	643634	2.17734e+06	1.79955e+06	2.25083e+06	1.33704e+06	2.06199e+06	1.14368e+06	1.72597e+06	2.15524e+06	1.22715e+06	1.13816e+06	48.46	1.83145e+06	1.93077e+06	22.45	0.67	-0.58	0.0498834	1.3	0.330421	1.5139	523.249	769.7	12.8	Down
M523T82_1	M523T82_1	1.35101e+06	847229	973224	1.60947e+06	1.18682e+06	811270	880311	840614	548850	510308	784368	824686	617333	1.23076e+06	1.10112e+06	341270	1.06249e+06	926768	27.5	744837	700851	40.71	1.43	0.51	0.0379176	1.42	0.297283	1.53822	522.711	82.1	1.4	Up
M524T756_2	M524T756_2	8.98899e+06	8.35356e+06	5.98033e+06	1.02699e+07	2.17476e+06	8.15765e+06	5.71935e+06	7.05499e+06	6.90247e+06	2.95803e+06	6.59959e+06	6.433e+06	2.09549e+06	4.73928e+06	4.17036e+06	1.85471e+06	7.08744e+06	7.60632e+06	35.26	4.46912e+06	4.45482e+06	45.73	1.59	0.67	0.0379176	1.42	0.297283	1.38181	524.285	755.9	12.6	Up
M524T812_2	M524T812_2	5.83953e+08	6.02103e+08	9.09914e+08	6.04285e+08	3.54167e+08	4.00438e+08	5.64123e+08	5.452e+08	3.43435e+08	5.46841e+08	3.85598e+08	5.47812e+08	2.69478e+08	5.23416e+08	4.61245e+08	4.65131e+08	5.70523e+08	5.74038e+08	29.17	4.42869e+08	4.63188e+08	22.96	1.29	0.37	0.0498834	1.3	0.330421	1.27811	524.379	811.9	13.5	Up
M524T85	M524T85	1.41064e+07	1.45395e+07	1.37469e+07	1.36989e+07	9.63124e+06	1.41394e+07	1.17559e+07	1.48297e+07	2.64573e+06	1.86384e+07	3.2442e+06	2.68332e+06	2.55236e+06	9.3857e+06	1.30033e+07	1.21683e+07	1.3306e+07	1.39266e+07	13.15	8.04016e+06	6.31495e+06	76.77	1.65	0.73	0.0379176	1.42	0.297283	1.67334	524.125	85.5	1.4	Up
M525T369_2	M525T369_2	97564.6	249951	147027	180379	208591	245959	296792	280716	142817	140353	148005	184083	147840	106377	108363	104539	213372	227275	32.09	135297	141585	20.32	1.58	0.66	0.0379176	1.42	0.297283	1.85399	525.18	368.6	6.1	Up
M525T536	M525T536	411427	241306	299549	145233	200253	107345	183382	295559	61628.8	56748.4	91070.4	162192	91895.7	275143	104721	74008.8	235507	220779	41.61	114676	91483	63.4	2.05	1.04	0.00699301	2.16	0.14968	1.87926	525.205	536.1	8.9	Up
M525T812_1	M525T812_1	1.24289e+07	1.31798e+07	2.15768e+07	1.49022e+07	7.53641e+06	1.02151e+07	1.02454e+07	3.21878e+06	8.51549e+06	4.80362e+06	9.624e+06	3.41733e+06	9.2305e+06	2.51331e+06	1.97363e+06	7.94868e+06	1.16629e+07	1.13371e+07	46.3	6.00332e+06	6.37615e+06	52.74	1.94	0.96	0.0206682	1.68	0.228643	1.56328	525.356	811.6	13.5	Up
M525T87_2	M525T87_2	2.69329e+06	5.71635e+06	5.2773e+06	2.26429e+06	3.19405e+06	2.95623e+06	5.09098e+06	4.84869e+06	460930	1.81904e+06	1.12696e+06	487676	1.49587e+06	3.74469e+06	1.72438e+06	1.5105e+06	4.00515e+06	4.02137e+06	33.96	1.54626e+06	1.50319e+06	66.57	2.59	1.37	0.0018648	2.73	0.096514	2.1341	525.11	87	1.4	Up
M525T94_2	M525T94_2	4.47254e+08	2.98224e+08	4.76292e+08	3.55546e+08	6.106e+08	3.26028e+08	3.24932e+08	3.61825e+08	5.69426e+08	8.31669e+08	8.7181e+08	5.76572e+08	3.95277e+08	4.63047e+08	5.08396e+08	6.41526e+08	4.00088e+08	3.58686e+08	26.27	6.07215e+08	5.72999e+08	27.8	0.66	-0.6	0.0104118	1.98	0.169968	1.94044	525.281	94.3	1.6	Down
M525T94_3	M525T94_3	7.74533e+06	1.48371e+07	9.87482e+06	1.07463e+07	5.90098e+06	8.355e+06	1.30025e+07	1.55177e+07	1.82413e+07	1.32725e+07	1.77621e+07	2.45356e+07	1.71434e+07	1.49775e+07	1.48367e+07	1.51866e+07	1.07475e+07	1.03105e+07	32.15	1.69945e+07	1.6165e+07	20.49	0.63	-0.66	0.004662	2.33	0.129379	1.99332	525.306	94.4	1.6	Down
M527T409_3	M527T409_3	3.81574e+06	4.56751e+06	4.14422e+06	3.6313e+06	3.90413e+06	3.53798e+06	3.13821e+06	2.54385e+06	1.21029e+06	3.08347e+06	1.86815e+06	2.10564e+06	2.01305e+06	2.4373e+06	3.49485e+06	3.31347e+06	3.66037e+06	3.72352e+06	16.89	2.44078e+06	2.27147e+06	32.57	1.5	0.58	0.0029526	2.53	0.116769	1.87784	526.88	408.9	6.8	Up
M527T412	M527T412	120999	1.09594e+06	936286	124187	161700	231403	197603	405757	1.02976e+06	1.20215e+06	785376	3.37509e+06	1.49631e+06	316590	1.89086e+06	844718	409235	214503	94.7	1.36761e+06	1.11596e+06	68.7	0.3	-1.74	0.0104118	1.98	0.169968	2.00385	527.384	411.6	6.9	Down
M527T77_1	M527T77_1	964102	1.10768e+06	1.85662e+06	1.10892e+06	1.27321e+06	1.06745e+06	1.10737e+06	1.01145e+06	563032	370089	658259	716185	844157	466611	1.15875e+06	532721	1.1871e+06	1.10752e+06	24.02	663726	610646	37.46	1.79	0.84	0.004662	2.33	0.129379	2.20619	527.245	76.8	1.3	Up
M527T79	M527T79	807211	1.00075e+06	1.19726e+06	829566	860751	1.07818e+06	1.00369e+06	996980	563648	745872	552642	940886	676084	904165	596211	735244	971799	998867	13.71	714344	705664	20.7	1.36	0.44	0.004662	2.33	0.129379	2.08607	526.92	79.1	1.3	Up
M527T82	M527T82	2.03927e+06	1.66082e+06	2.14086e+06	2.28498e+06	1.53319e+06	2.82479e+06	2.24871e+06	2.11904e+06	2.84847e+06	2.26969e+06	2.94956e+06	3.76378e+06	3.89798e+06	3.7293e+06	2.18899e+06	3.43764e+06	2.10646e+06	2.12995e+06	18.83	3.13568e+06	3.1936e+06	21.5	0.67	-0.57	0.0029526	2.53	0.116769	2.06302	526.809	81.6	1.4	Down
M527T825_2	M527T825_2	2.47207e+09	2.78127e+09	2.12006e+09	2.3549e+09	3.05226e+09	2.88992e+09	2.63739e+09	2.4723e+09	1.34277e+09	1.73029e+09	2.59673e+09	2.727e+09	2.31495e+09	2.34406e+09	2.17978e+09	1.28687e+09	2.59752e+09	2.55485e+09	11.69	2.06531e+09	2.24736e+09	26.61	1.26	0.33	0.0379176	1.42	0.297283	1.57419	527.303	825.5	13.8	Up
M528T380_5	M528T380_5	24485.2	5864.71	48722.3	42024.3	18827.7	11310.9	59964.4	78066.2	177103	358668	23487.1	322023	250132	80974.9	56035.4	82011	36158.2	33254.7	70.02	168804	129557	76.03	0.21	-2.22	0.00699301	2.16	0.14968	1.92881	528.275	380.3	6.3	Down
M528T802	M528T802	3.50596e+06	1.05629e+06	5.57731e+06	4.31582e+06	4.11319e+06	8.5794e+06	1.5434e+06	3.97284e+06	1.37763e+06	5.23579e+06	1.11291e+06	1.14812e+06	738369	1.26847e+06	1.18808e+06	3.34192e+06	4.08303e+06	4.04302e+06	57.41	1.92641e+06	1.22827e+06	80.69	2.12	1.08	0.0498834	1.3	0.330421	1.58735	528.268	801.7	13.4	Up
M528T812	M528T812	4.06715e+06	6.89537e+06	1.23022e+07	6.01218e+06	2.6459e+06	3.68442e+06	3.33901e+06	2.93987e+06	2.58737e+06	2.75455e+06	3.21443e+06	3.08692e+06	2.98918e+06	2.29363e+06	1.9675e+06	4.41544e+06	5.23576e+06	3.87578e+06	61.53	2.91363e+06	2.87186e+06	25.26	1.8	0.85	0.0379176	1.42	0.297283	1.59565	528.366	811.7	13.5	Up
M529T78	M529T78	244836	92757.5	203644	228613	225050	183831	156636	199476	195871	83788.7	166343	122522	186300	78080	62548.2	107936	191855	201560	25.37	125424	115229	41.08	1.53	0.61	0.0206682	1.68	0.228643	1.62951	528.862	78.5	1.3	Up
M529T825	M529T825	6.71146e+07	6.22647e+07	9.58951e+07	8.17814e+07	1.17596e+08	2.49737e+07	8.50437e+07	5.01932e+07	3.5144e+07	2.98417e+07	3.29e+07	8.2797e+07	3.41879e+07	5.57202e+07	4.1688e+07	1.13838e+07	7.31077e+07	7.4448e+07	39.07	4.04578e+07	3.4666e+07	52.1	1.81	0.85	0.0379176	1.42	0.297283	1.59683	529.297	825.4	13.8	Up
M530T114_2	M530T114_2	7490.35	148960	19406.9	22643.2	2173.31	301374	25179.1	28059.3	695701	58975.9	314697	564788	624874	106000	11637.5	254064	69410.7	23911.1	150.95	328842	284380	81.82	0.21	-2.24	0.0281274	1.55	0.261699	1.64722	530.155	113.6	1.9	Down
M530T124_2	M530T124_2	1.76826e+07	1.57398e+07	2.1144e+07	1.9021e+07	1.10742e+07	1.46278e+07	1.47922e+07	1.53325e+07	167204	8.22699e+06	160232	443768	380158	1.0717e+07	9.15386e+06	1.16838e+07	1.61767e+07	1.55362e+07	19.02	5.11664e+06	4.33538e+06	102.84	3.16	1.66	0.0003108	3.51	0.0568482	1.92709	530.14	124.4	2.1	Up
M531T80_2	M531T80_2	2.76626e+07	3.25868e+07	4.08638e+07	2.89397e+07	3.09606e+07	3.82045e+07	2.94424e+07	3.43636e+07	4.25866e+07	3.60882e+07	4.77015e+07	3.87358e+07	5.33452e+07	4.60035e+07	3.57599e+07	4.34328e+07	3.2878e+07	3.17737e+07	14.2	4.29567e+07	4.30097e+07	14.1	0.77	-0.39	0.0029526	2.53	0.116769	2.10488	530.842	79.9	1.3	Down
M532T78	M532T78	751332	745611	779562	767753	775898	889176	678847	729673	355955	896601	349872	354390	322052	666523	695160	656754	764731	759543	7.81	537163	506355	40.59	1.42	0.51	0.014763	1.83	0.200021	1.7924	532.015	77.9	1.3	Up
M532T789	M532T789	1.00991e+06	2.43898e+06	1.71311e+06	1.89804e+06	1.88596e+06	1.72552e+06	1.89022e+06	1.78951e+06	1.73101e+06	1.55604e+06	1.52868e+06	1.09836e+06	1.1442e+06	1.08491e+06	1.55151e+06	1.77343e+06	1.7939e+06	1.83773e+06	21.8	1.43352e+06	1.5401e+06	19.72	1.25	0.32	0.0379176	1.42	0.297283	1.43303	532.349	789.2	13.2	Up
M534T565_2	M534T565_2	684372	256800	223085	293831	415551	447077	559063	533503	207348	161128	200106	51152.1	111624	261776	487089	162984	426660	431314	37.98	205401	181545	63.45	2.08	1.05	0.00699301	2.16	0.14968	1.83542	533.837	564.7	9.4	Up
M535T100	M535T100	146527	440171	716331	154787	726130	513886	673334	182020	804459	914406	1.16102e+06	775378	576057	599812	620829	452574	444148	477028	57.21	738066	698104	30.57	0.6	-0.73	0.0498834	1.3	0.330421	1.5933	534.97	99.7	1.7	Down
M535T649	M535T649	346153	291354	329205	240371	220700	330090	322323	376042	168122	322419	211623	213783	313969	152890	277707	234545	307030	325764	17.28	236882	224164	26.64	1.3	0.37	0.0206682	1.68	0.228643	1.5328	535.327	649.3	10.8	Up
M535T82_2	M535T82_2	819223	818620	8121.71	818184	681863	833170	22266.6	12113.1	3.30357e+06	768465	2.41525e+06	2.29507e+06	2.41505e+06	1.06053e+06	927081	1.11675e+06	501695	750024	81.03	1.78772e+06	1.70591e+06	52.22	0.28	-1.83	0.0018648	2.73	0.096514	1.78605	534.796	81.5	1.4	Down
M536T108_1	M536T108_1	481124	280315	279162	185224	449412	321477	256715	240262	7.08125e+06	615554	8.02027e+06	6.89218e+06	4.68386e+06	183698	855851	1.44968e+06	311711	279739	32.97	3.72279e+06	3.06677e+06	88.67	0.08	-3.58	0.0104118	1.98	0.169968	2.1022	535.965	107.9	1.8	Down
M536T480_2	M536T480_2	1.57608e+06	2.57462e+06	1.83166e+06	2.38165e+06	1.70073e+06	1.94619e+06	1.79236e+06	1.5887e+06	1.70778e+06	73892.5	1.0969e+06	409955	761865	1.62875e+06	1.04077e+06	1.81091e+06	1.924e+06	1.81201e+06	19.07	1.06635e+06	1.06883e+06	59.23	1.8	0.85	0.014763	1.83	0.200021	1.57535	536.015	480	8	Up
M536T480_6	M536T480_6	1.22266e+07	2.44863e+07	6.48403e+06	2.09572e+07	1.14753e+07	2.12272e+07	1.7637e+07	1.48344e+07	6.88083e+06	9.86756e+06	9.83372e+06	4.92781e+06	1.97317e+07	4.79778e+06	8.51069e+06	1.43844e+07	1.6166e+07	1.62357e+07	37.19	9.86681e+06	9.17221e+06	51.19	1.64	0.71	0.0379176	1.42	0.297283	1.5735	536.205	480	8	Up
M536T65_1	M536T65_1	676084	391120	607295	638770	665440	773726	593397	471100	621484	691428	1.74585e+06	682659	1.32116e+06	665838	652018	675256	602116	623032	20.05	881961	678957	47.44	0.68	-0.55	0.0498834	1.3	0.330421	1.42517	536.144	65.2	1.1	Down
M536T99	M536T99	7.54213e+06	9.32005e+06	6.6201e+06	7.48552e+06	7.73917e+06	6.78362e+06	1.04242e+07	1.04436e+07	3.20269e+06	9.1709e+06	3.18504e+06	2.48333e+06	3.91935e+06	7.411e+06	7.69493e+06	7.30049e+06	8.2948e+06	7.64065e+06	18.69	5.54597e+06	5.60992e+06	46.92	1.5	0.58	0.0498834	1.3	0.330421	1.67355	535.966	99.5	1.7	Up
M537T81	M537T81	3.12412e+06	3.95996e+06	3.54441e+06	3.46148e+06	3.70093e+06	3.2167e+06	3.36158e+06	3.41947e+06	4.33369e+06	4.16141e+06	4.53008e+06	3.6617e+06	3.9184e+06	3.36821e+06	3.66454e+06	4.26342e+06	3.47358e+06	3.44047e+06	7.67	3.98768e+06	4.03991e+06	10.03	0.87	-0.2	0.0206682	1.68	0.228643	1.82463	536.837	81.5	1.4	Down
M538T105	M538T105	2.51424e+07	4.73119e+07	3.89022e+07	3.61489e+07	5.2418e+07	5.32932e+07	7.07737e+07	6.45792e+07	9.39766e+06	4.64714e+07	1.0934e+07	7.68612e+06	8.3337e+06	1.24593e+07	1.93132e+07	1.46415e+07	4.85712e+07	4.9865e+07	30.98	1.61546e+07	1.16966e+07	79.37	3.01	1.59	0.0010878	2.96	0.0833774	2.41391	538.155	104.7	1.7	Up
M538T764	M538T764	1.09644e+06	2.285e+06	3.31468e+06	1.88868e+06	2.5582e+06	2.58148e+06	2.47047e+06	2.43936e+06	2.29998e+06	1.16383e+06	1.53283e+06	1.19006e+06	1.41293e+06	2.05138e+06	1.03672e+06	1.70804e+06	2.32929e+06	2.45491e+06	27.32	1.54947e+06	1.47288e+06	28.86	1.5	0.59	0.0206682	1.68	0.228643	1.76277	538.347	764.5	12.7	Up
M539T180	M539T180	4.304e+07	1.07632e+07	7.8639e+07	4.95688e+07	3.00046e+07	6.14256e+07	4.48949e+07	3.72172e+07	1.54368e+07	5.22522e+06	1.39456e+07	1.3231e+07	4.2047e+07	4.44516e+07	2.97061e+07	1.28414e+07	4.44441e+07	4.39674e+07	45.65	2.21106e+07	1.46912e+07	66.54	2.01	1.01	0.0379176	1.42	0.297283	1.56103	539.174	179.8	3	Up
M539T270	M539T270	3.80197e+06	6.74193e+06	5.92911e+06	3.22477e+06	3.37016e+06	5.97905e+06	4.99116e+06	5.34257e+06	7.52777e+06	7.59645e+06	6.22337e+06	7.35347e+06	7.63558e+06	4.4225e+06	3.52872e+06	8.95634e+06	4.92259e+06	5.16686e+06	26.78	6.65553e+06	7.44062e+06	27.43	0.74	-0.44	0.0379176	1.42	0.297283	1.35868	539.154	270.5	4.5	Down
M539T428	M539T428	176880	1.17876e+06	188767	306584	69220.6	387264	480931	365611	26849.3	106464	170551	17006	127077	209389	150288	88166.1	394252	336097	87.16	111974	116771	59.89	3.52	1.82	0.0104118	1.98	0.169968	1.80815	538.775	427.5	7.1	Up
M539T563_1	M539T563_1	319797	247676	601045	942091	396885	831969	930161	946827	239423	177704	291711	94379.7	225197	434175	487455	314591	652056	716507	45.73	283079	265567	45.79	2.3	1.2	0.0104118	1.98	0.169968	1.93044	539.297	563.1	9.4	Up
M539T82_2	M539T82_2	622841	171873	736904	257174	331820	277953	774948	183453	962735	1.25998e+06	290796	959141	1.21201e+06	342373	1.41609e+06	390368	419621	304887	59.72	854187	960938	52.83	0.49	-1.03	0.0206682	1.68	0.228643	1.5995	538.82	81.6	1.4	Down
M539T820	M539T820	2.21847e+07	2.13895e+07	1.29454e+07	2.89155e+07	1.57883e+07	1.99796e+07	2.2959e+07	1.85654e+07	1.38455e+07	6.88274e+06	9.13427e+06	5.5036e+06	9.70342e+06	2.26485e+07	1.41125e+07	1.84012e+07	2.03409e+07	2.06845e+07	23.77	1.2529e+07	1.17745e+07	46.92	1.62	0.7	0.0206682	1.68	0.228643	1.82481	539.398	820.1	13.7	Up
M539T85_1	M539T85_1	9.2738e+06	1.61793e+07	1.29227e+07	1.52825e+07	1.48837e+07	1.40748e+07	1.65528e+07	1.79851e+07	8.0342e+06	1.0856e+07	1.11155e+07	6.94582e+06	6.32299e+06	9.18308e+06	7.82815e+06	1.09128e+07	1.46443e+07	1.50831e+07	18.21	8.89981e+06	8.60864e+06	21.33	1.65	0.72	0.0010878	2.96	0.0833774	2.38783	539.011	84.8	1.4	Up
M539T85_3	M539T85_3	1.19794e+07	2.30893e+07	1.0837e+07	1.31167e+07	1.47971e+07	1.54962e+07	2.7277e+07	1.80217e+07	3.63892e+06	1.44242e+07	2.17455e+07	1.95915e+06	2.12092e+06	5.8676e+06	2.02182e+06	8.67102e+06	1.68268e+07	1.51467e+07	33.98	7.55614e+06	4.75326e+06	94.83	2.23	1.16	0.014763	1.83	0.200021	1.96951	539.039	84.6	1.4	Up
M539T87	M539T87	1.85838e+06	1.32675e+06	1.46205e+06	1.97165e+06	1.70416e+06	390847	1.28162e+06	1.10025e+06	1.52424e+06	2.12883e+06	2.41954e+06	2.97338e+06	1.98485e+06	2.63335e+06	1.87522e+06	1.05055e+06	1.38696e+06	1.3944e+06	36.15	2.07375e+06	2.05684e+06	29.62	0.67	-0.58	0.0281274	1.55	0.261699	1.44546	539.105	86.8	1.4	Down
M540T147	M540T147	1.80576e+06	3.32563e+06	265035	2.38225e+06	7.41737e+06	1.93175e+06	1.82676e+06	2.03692e+06	787623	1.4634e+06	1.39263e+06	1.3268e+06	897619	734562	788296	1.00781e+06	2.62393e+06	1.98433e+06	80.49	1.04984e+06	952716	28.5	2.5	1.32	0.0104118	1.98	0.169968	1.36855	540.184	147.2	2.5	Up
M540T181	M540T181	1.74994e+06	1.85227e+06	1.92723e+06	2.86915e+06	2.1732e+06	2.17656e+06	2.5104e+06	2.49988e+06	1.63778e+06	2.31031e+06	1.50362e+06	1.41638e+06	1.16679e+06	1.56295e+06	1.55605e+06	1.65575e+06	2.21983e+06	2.17488e+06	17.28	1.6012e+06	1.5595e+06	20.35	1.39	0.47	0.0029526	2.53	0.116769	2.12915	540.181	180.7	3	Up
M540T280	M540T280	3.83549e+06	3.93376e+06	2.99697e+06	5.4443e+06	4.37636e+06	3.54924e+06	4.82305e+06	5.21715e+06	2.38082e+06	4.2226e+06	2.53648e+06	649737	2.24384e+06	2.35902e+06	2.36829e+06	3.36456e+06	4.27204e+06	4.15506e+06	19.85	2.51567e+06	2.37455e+06	40.47	1.7	0.76	0.0029526	2.53	0.116769	1.84583	540.174	280.2	4.7	Up
M540T338_1	M540T338_1	1.06085e+07	1.40502e+07	1.00832e+07	1.20211e+07	1.24512e+07	1.12719e+07	9.35511e+06	7.90534e+06	7.43339e+06	7.97346e+06	1.17126e+07	6.02735e+06	1.83901e+06	7.91646e+06	6.42477e+06	5.89608e+06	1.09683e+07	1.09402e+07	17.5	6.90288e+06	6.92908e+06	39.95	1.59	0.67	0.00699301	2.16	0.14968	1.76781	540.157	338.4	5.6	Up
M540T805	M540T805	7.3948e+06	2.62504e+06	1.42676e+07	6.67362e+06	3.78037e+06	7.88146e+06	3.93537e+06	6.02005e+06	6.31561e+06	5.26125e+06	2.41263e+06	5.10203e+06	2.71756e+06	2.03528e+06	1.33672e+06	1.71845e+06	6.57229e+06	6.34683e+06	55.24	3.36244e+06	2.56509e+06	56.47	1.95	0.97	0.0281274	1.55	0.261699	1.63133	540.302	804.5	13.4	Up
M540T810_2	M540T810_2	3.41354e+06	2.6886e+06	2.51774e+06	4.94437e+06	853924	2.93291e+06	2.96407e+06	4.36768e+06	2.28458e+06	1.01636e+06	1.62575e+06	626796	1.70342e+06	2.74761e+06	2.13701e+06	1.83123e+06	3.08535e+06	2.94849e+06	40.08	1.7466e+06	1.76733e+06	39.04	1.77	0.82	0.014763	1.83	0.200021	1.50496	540.314	810.2	13.5	Up
M541T304_1	M541T304_1	5.15931e+06	9.93681e+06	5.55604e+06	7.66211e+06	1.23468e+07	1.07475e+07	1.15426e+07	9.14171e+06	5.7739e+06	3.39915e+06	9.78791e+06	3.78265e+06	5.03905e+06	3.77716e+06	3.54116e+06	3.98723e+06	9.01161e+06	9.53926e+06	29.66	4.88603e+06	3.88494e+06	43.84	1.84	0.88	0.004662	2.33	0.129379	2.13206	541.121	304.1	5.1	Up
M541T805	M541T805	1.54913e+06	587139	986606	2.57193e+06	1.7721e+06	636084	832460	428431	210496	60287.3	277371	449578	200418	1.41869e+06	1.31285e+06	30213.8	1.17048e+06	909533	62.9	494988	243934	111.81	2.36	1.24	0.0281274	1.55	0.261699	1.67799	541.306	804.6	13.4	Up
M541T85_1	M541T85_1	4.07765e+06	7.33585e+06	6.42655e+06	7.32522e+06	7.00972e+06	6.63478e+06	7.95115e+06	8.24179e+06	2.24082e+06	5.53049e+06	2.48396e+06	2.16634e+06	1.80587e+06	4.16639e+06	4.23528e+06	5.14329e+06	6.87534e+06	7.16747e+06	18.68	3.47156e+06	3.32518e+06	42.26	1.98	0.99	0.0018648	2.73	0.096514	2.26679	541.01	84.8	1.4	Up
M541T85_2	M541T85_2	4.7079e+06	4.09602e+06	5.17274e+06	8.43581e+06	5.74667e+06	3.51563e+06	4.50335e+06	4.33504e+06	2.91484e+06	1.92214e+06	3.97022e+06	4.14576e+06	2.99801e+06	4.58158e+06	3.52925e+06	1.70747e+06	5.06414e+06	4.60563e+06	30	3.22116e+06	3.26363e+06	32.1	1.57	0.65	0.0104118	1.98	0.169968	1.88072	541.026	84.8	1.4	Up
M542T304_1	M542T304_1	7.13686e+06	1.52455e+06	1.57095e+06	5.15105e+06	1.99305e+06	1.42806e+06	8.19689e+06	7.07131e+06	9.46448e+06	1.10288e+07	7.14736e+06	2.0639e+06	1.67829e+07	8.73304e+06	3.81204e+06	9.28656e+06	4.25909e+06	3.57205e+06	68.94	8.53988e+06	9.0098e+06	52.71	0.5	-1	0.014763	1.83	0.200021	1.50639	542.127	303.9	5.1	Down
M542T375	M542T375	458772	101518	608503	140885	174127	565288	150205	704181	160245	615676	731465	806902	723323	567450	646438	523791	362935	316450	67.93	596911	631057	33.38	0.61	-0.72	0.0379176	1.42	0.297283	1.43384	542.229	375.2	6.3	Down
M542T782	M542T782	722058	462931	542814	694720	689885	420544	945181	513592	537087	209963	343810	359900	310044	876749	481320	252402	623966	616350	27.64	421409	351855	50.72	1.48	0.57	0.0379176	1.42	0.297283	1.60563	542.366	781.6	13	Up
M542T80_1	M542T80_1	1.60699e+07	1.42603e+07	1.66748e+07	1.84547e+07	1.48702e+07	1.03268e+07	1.17915e+07	1.17978e+07	1.21884e+07	1.06378e+07	1.29449e+07	1.38879e+07	9.55166e+06	1.41639e+07	1.02384e+07	9.49919e+06	1.42808e+07	1.45653e+07	19.57	1.1639e+07	1.14131e+07	16.35	1.23	0.3	0.0498834	1.3	0.330421	1.49165	542.115	79.9	1.3	Up
M542T80_2	M542T80_2	1.14042e+07	1.10797e+07	9.48295e+06	9.10501e+06	1.00628e+07	1.17389e+07	1.05323e+07	1.25086e+07	1.22605e+07	1.27992e+07	1.18499e+07	1.27452e+07	1.27374e+07	1.13771e+07	1.13646e+07	1.42593e+07	1.07393e+07	1.0806e+07	10.81	1.24241e+07	1.2499e+07	7.63	0.86	-0.21	0.0104118	1.98	0.169968	1.94062	542.13	79.9	1.3	Down
M543T304	M543T304	594407	646357	650108	279414	152727	434231	623232	684626	856796	505567	1.18227e+06	690543	917264	457413	693798	782394	508138	608820	39.02	760756	738096	30.56	0.67	-0.58	0.0206682	1.68	0.228643	1.48545	543.126	304	5.1	Down
M543T80_2	M543T80_2	1.0453e+07	1.54309e+07	1.28268e+07	1.13581e+07	1.05416e+07	1.59885e+07	1.46329e+07	1.50838e+07	8.13498e+06	1.32438e+07	2.92513e+06	1.38799e+07	8.24358e+06	8.66039e+06	1.51222e+06	8.88241e+06	1.32895e+07	1.37298e+07	17.17	8.1853e+06	8.45199e+06	52.84	1.62	0.7	0.0104118	1.98	0.169968	1.61969	543.128	79.9	1.3	Up
M544T415	M544T415	392883	568059	487762	502506	743740	690486	648710	721452	184632	550755	489318	296265	145181	465296	447619	367041	594450	608384	21.25	368264	407330	40.06	1.61	0.69	0.00699301	2.16	0.14968	1.84319	544.293	414.8	6.9	Up
M544T679_2	M544T679_2	1.1928e+06	1.14843e+06	894273	561551	799958	1.10071e+06	1.19755e+06	1.1829e+06	1.74098e+06	1.2556e+06	1.92291e+06	1.62998e+06	1.59279e+06	1.07046e+06	995308	1.18764e+06	1.00977e+06	1.12457e+06	23.21	1.42446e+06	1.4242e+06	23.93	0.71	-0.5	0.0379176	1.42	0.297283	1.76549	544.277	678.9	11.3	Down
M544T777	M544T777	725063	1.79711e+06	1.22863e+06	692761	944745	774620	1.37546e+06	1.45279e+06	2.70349e+06	1.07367e+06	1.91462e+06	1.62614e+06	2.19758e+06	1.76244e+06	1.06874e+06	2.44585e+06	1.1239e+06	1.08669e+06	35.82	1.84907e+06	1.83853e+06	32.19	0.61	-0.72	0.0206682	1.68	0.228643	1.76846	544.301	776.7	12.9	Down
M544T832_3	M544T832_3	5.68056e+09	5.17366e+09	3.98689e+09	4.99493e+09	3.76811e+09	1.32956e+10	3.9022e+09	6.64038e+09	1.36978e+10	5.00185e+09	8.91735e+09	1.60198e+10	1.11355e+10	9.02912e+09	8.39609e+09	9.48399e+09	5.93029e+09	5084297048	52.88	1.02102e+10	9.25655e+09	33.27	0.58	-0.78	0.014763	1.83	0.200021	1.84214	544.346	832.1	13.9	Down
M546T504_4	M546T504_4	109879	6815.99	9485.35	8340.63	405929	8404.45	17029.6	15124.9	797380	475469	623882	553165	397605	1873.52	449472	302237	72626.1	12305.1	191.54	450136	462471	52.28	0.16	-2.63	0.0206682	1.68	0.228643	1.79834	546.283	503.9	8.4	Down
M546T771	M546T771	3.18637e+07	1.7061e+08	8.67378e+07	4.90836e+07	5.22689e+07	5.73635e+07	4.65339e+07	1.133e+08	1.50224e+08	1.44739e+08	1.25422e+08	1.25607e+08	6.9925e+07	1.57562e+08	5.65325e+07	1.68558e+08	7.59702e+07	54816170	60.75	1.24821e+08	1.35173e+08	32.76	0.61	-0.72	0.0498834	1.3	0.330421	1.53614	546.334	770.7	12.8	Down
M547T101	M547T101	1.05066e+06	808046	1.14846e+06	1.55597e+06	1.09549e+06	891747	1.02219e+06	1.04789e+06	749010	543292	934932	990574	764950	998887	883899	565532	1.07756e+06	1.04927e+06	20.63	803884	824424	22.34	1.34	0.42	0.00699301	2.16	0.14968	1.78881	547.135	100.6	1.7	Up
M547T504	M547T504	162341	7137.61	27464.4	15958.2	158908	6417.87	17046.9	50206.8	256620	900703	118992	243428	433580	117885	187435	141588	55685.2	22255.7	118.95	300029	215431	87.95	0.19	-2.43	0.004662	2.33	0.129379	2.25806	546.533	504	8.4	Down
M547T770_2	M547T770_2	9.0522e+07	7.313e+07	6.89116e+07	9.64933e+07	8.09537e+07	1.54166e+08	1.04509e+08	5.13022e+07	1.4635e+08	1.31955e+08	2.24211e+08	4.84883e+08	2.07028e+08	1.55959e+08	1.65843e+08	6.58479e+07	8.99985e+07	8.57379e+07	34.32	1.97759e+08	1.60901e+08	63.49	0.46	-1.14	0.014763	1.83	0.200021	1.83605	547.349	770.1	12.8	Down
M549T417_2	M549T417_2	735743	2.26119e+06	1.13172e+06	828380	2.08387e+06	653421	1.34366e+06	862471	345763	71707.3	312924	566686	595077	422262	361888	63659	1.23756e+06	997093	50.07	342496	353826	57.63	3.61	1.85	0.0001554	3.81	0.0532196	2.18558	548.883	416.7	6.9	Up
M549T80	M549T80	4.87396e+06	2.98295e+06	3.00871e+06	2.54974e+07	2.27068e+06	2.8169e+06	8.3089e+06	8.92451e+06	3.22993e+07	1.38547e+07	1.4731e+07	1.66103e+07	2.00651e+07	3.66341e+06	8.91013e+06	1.46103e+07	7.3355e+06	3.94133e+06	105.99	1.5593e+07	1.46707e+07	53.76	0.47	-1.09	0.0281274	1.55	0.261699	1.62449	548.818	80.2	1.3	Down
[truncated: 1,060 more rows]
