# Supplementary material for: The impact of dapagliflozin for the myocardial metabolomic profiles of mice with chronic heart failure induced by a high fat diet
Source: Research Square preprint supplement (doi:10.21203/rs.3.rs-6881055/v1), 2025-06-25
Supplement: Supplementary file 12 [file 9d883f61eba4069bcff7e8ce.xlsx]

## Sheet: DEM_AnalysiList
Accession	DAPA_Mean	DAPA_Median	DAPA_RSD	HDF_Mean	HDF_Median	HDF_RSD	FC	log2FC	P.value	-log10(P.value)	FDR	VIP	Mass-to-charge ratio	Retention indices	Retention times(min)
M100T336	1.05416e+06	1.25466e+06	37.94	995319	968268	30.26	1.06	0.08	0.720901	0.14	0.912378	0.0387138	100.076	335.8	5.6
M100T343	5.78618e+06	6.32776e+06	42.68	6.47586e+06	6.04593e+06	59.51	0.89	-0.16	0.878477	0.06	0.967431	0.0168795	100.076	343.1	5.7
M100T72	2.08502e+07	2.11483e+07	11.66	1.95673e+07	1.94218e+07	8.47	1.07	0.09	0.382284	0.42	0.730096	0.932324	100.024	71.8	1.2
M101T119	8.32037e+06	8.10643e+06	7.7	8.0403e+06	7.99964e+06	12.57	1.03	0.05	0.505361	0.3	0.809141	0.536439	101.06	118.6	2
M101T468	168699	174388	36.39	156426	167432	22.39	1.08	0.11	0.645377	0.19	0.878848	0.242433	101.023	468	7.8
M101T64	3.63471e+06	3.47454e+06	17.97	5.11289e+06	5.22447e+06	40.24	0.71	-0.49	0.278632	0.55	0.649698	1.1743	101.06	64.5	1.1
M101T72	3.5441e+06	3.86721e+06	31.28	3.47107e+06	3.3439e+06	8.75	1.02	0.03	0.234499	0.63	0.606344	0.200123	101.025	71.7	1.2
M101T807	2.94434e+06	2.82414e+06	37.92	3.47653e+06	3.29322e+06	41.95	0.85	-0.24	0.573737	0.24	0.846615	0.501633	100.51	807.1	13.5
M101T85	1.34807e+07	1.37849e+07	23.72	1.81629e+07	1.80528e+07	30.75	0.74	-0.43	0.0281274	1.55	0.261699	1.32834	101.071	85.3	1.4
M101T88	2.81422e+06	2.19502e+06	90.17	3.28138e+06	3.15048e+06	79.29	0.86	-0.22	0.505361	0.3	0.809141	0.461554	100.988	88.1	1.5
M102T122	1.45092e+07	1.72657e+07	50.35	1.17354e+07	1.10743e+07	47.43	1.24	0.31	0.573737	0.24	0.846615	0.472242	102.055	121.9	2
M102T401	3.40539e+06	1.95423e+06	97.1	3.50984e+06	3.24078e+06	42.87	0.97	-0.04	0.328205	0.48	0.69011	0.592151	102.091	401.4	6.7
M102T65	9.60141e+07	1.15629e+08	45.63	9.55832e+07	1.08467e+08	49.67	1	0.01	0.878477	0.06	0.967431	0.103442	102.127	64.6	1.1
M102T691	1.09643e+07	1.03913e+07	34.29	1.12668e+07	1.11178e+07	42.66	0.97	-0.04	0.95913	0.02	0.990641	0.0763473	102.033	690.8	11.5
M102T72_1	1.34892e+07	7.1014e+06	82.36	4.78415e+06	4.55813e+06	78.61	2.82	1.5	0.0498834	1.3	0.330421	1.58342	102.022	71.8	1.2
M102T72_2	7.95503e+06	7.94822e+06	16.36	9.45835e+06	9.62492e+06	18.31	0.84	-0.25	0.0829837	1.08	0.403171	1.32796	102.034	72	1.2
M102T747	5.74329e+06	5.76652e+06	19.14	4.4696e+06	4.42072e+06	25.12	1.28	0.36	0.0379176	1.42	0.297283	1.60123	102.034	747.1	12.5
M102T760	1.66736e+06	1.61807e+06	46.05	2.31749e+06	2.09744e+06	68.71	0.72	-0.48	0.441803	0.35	0.769616	0.435812	102.091	760	12.7
M102T815	2.09854e+07	2.19237e+07	34.64	1.97014e+07	1.85723e+07	45.33	1.07	0.09	0.645377	0.19	0.878848	0.287857	102.127	814.8	13.6
M102T88	5.72303e+07	3.69039e+07	82.24	3.7976e+07	2.64913e+07	59.95	1.51	0.59	0.720901	0.14	0.912378	0.404225	102.055	88.2	1.5
M102T89	3.41731e+06	3.48811e+06	6.97	3.22938e+06	3.25379e+06	6.51	1.06	0.08	0.130381	0.88	0.480121	1.13995	102.091	89.5	1.5
M102T99	7.36201e+06	7.3255e+06	7.32	7.52437e+06	7.76971e+06	16.92	0.98	-0.03	0.573737	0.24	0.846615	0.0562736	102.055	99.4	1.7
M103T103	829615	715926	36.94	556295	465462	82.75	1.49	0.58	0.328205	0.48	0.69011	1.34615	103.039	103.3	1.7
M103T338	2.0471e+07	2.08649e+07	36.03	1.85113e+07	1.94874e+07	28.85	1.11	0.15	0.720901	0.14	0.912378	0.43124	103.054	338.4	5.6
M103T72	1.57773e+06	1.45558e+06	53.17	2.52717e+06	2.32049e+06	65.9	0.62	-0.68	0.194872	0.71	0.56435	1.07954	102.97	72.1	1.2
M103T88	2.35076e+06	1.88331e+06	77.97	2.6853e+06	2.35386e+06	45.92	0.88	-0.19	0.441803	0.35	0.769616	0.837402	103.058	88.2	1.5
M103T89	7.00993e+06	6.66109e+06	20.4	1.06659e+07	9.56657e+06	32.38	0.66	-0.61	0.0018648	2.73	0.096514	1.95919	103.039	89.5	1.5
M103T99	1.72409e+06	1.76383e+06	32.04	1.85751e+06	1.5865e+06	41.65	0.93	-0.11	0.720901	0.14	0.912378	0.302274	103.05	98.6	1.6
M104T113	8.1966e+07	8.37615e+07	35.77	8.7418e+07	9.05885e+07	17.15	0.94	-0.09	0.878477	0.06	0.967431	0.485039	104.107	113.1	1.9
M104T122	1.05328e+08	8.80992e+07	45.5	3.62318e+07	2.10223e+07	98.37	2.91	1.54	0.0029526	2.53	0.116769	1.9958	104.053	121.7	2
M104T418	232456	244958	25.23	241205	242300	12.26	0.96	-0.05	1	0	1	0.446659	104.053	417.9	7
M104T86	1.44903e+09	1.4152e+09	23.73	1.3914e+09	1.35354e+09	8.88	1.04	0.06	0.645377	0.19	0.878848	0.182739	104.107	85.6	1.4
M104T89	4.53152e+07	4.28376e+07	20.97	9.34982e+07	9.79952e+07	51.41	0.48	-1.04	0.0379176	1.42	0.297283	1.77531	104.07	88.8	1.5
M104T99	2.27209e+07	2.26622e+07	19.52	2.11693e+07	2.11377e+07	24.19	1.07	0.1	0.645377	0.19	0.878848	0.599739	104.107	99.3	1.7
M105T381	1.58248e+06	1.05449e+06	83.65	2.40717e+06	1.0503e+06	126.61	0.66	-0.61	0.878477	0.06	0.967431	0.174774	105.07	380.9	6.3
M105T502	52384.5	55852.9	30.15	45971.1	46945.1	19.17	1.14	0.19	0.194872	0.71	0.56435	0.676585	105.037	501.6	8.4
M105T72	4.16658e+06	4.06219e+06	10.52	3.59531e+06	3.4713e+06	14.5	1.16	0.21	0.0379176	1.42	0.297283	1.64936	105.003	71.8	1.2
M105T86	4.55054e+07	2.15645e+07	118.53	1.16648e+08	1.13023e+08	71.14	0.39	-1.36	0.104895	0.98	0.440144	1.15614	105.11	85.6	1.4
M105T89	4.65234e+06	4.56609e+06	27.38	4.40785e+06	4.48972e+06	8.49	1.06	0.08	1	0	1	0.0893233	105.074	88.8	1.5
M106T116	2.12454e+06	2.15592e+06	29.99	2.06485e+06	1.87719e+06	27.7	1.03	0.04	0.720901	0.14	0.912378	0.0666505	106.05	116.4	1.9
M106T468	200298	231378	56.63	296878	214067	55.16	0.67	-0.57	0.573737	0.24	0.846615	1.0224	106.086	468.1	7.8
M106T73	588937	585340	16.39	632309	634125	24.25	0.93	-0.1	0.573737	0.24	0.846615	0.446335	105.963	73.2	1.2
M106T84	1.28461e+08	1.27858e+08	20.67	9.10968e+07	8.79859e+07	26.9	1.41	0.5	0.0104118	1.98	0.169968	1.82571	106.05	84.5	1.4
M106T86	1.7178e+06	1202771	77.36	1.6051e+06	1.07488e+06	83.63	1.07	0.1	0.573737	0.24	0.846615	0.189856	106.111	85.6	1.4
M107T125	1.64842e+06	1.64376e+06	25.82	1.56901e+06	1.6374e+06	29.94	1.05	0.07	0.95913	0.02	0.990641	0.307286	107.049	125.3	2.1
M107T338	5.91451e+06	6.07939e+06	17.51	6.49369e+06	6.51068e+06	10.68	0.91	-0.13	0.328205	0.48	0.69011	0.970032	107.049	338.4	5.6
M107T624	1.24399e+06	1.21197e+06	16.35	1.17858e+06	1.07477e+06	24.27	1.06	0.08	0.573737	0.24	0.846615	0.525957	107.049	624.1	10.4
M107T742	4.254e+06	4.78671e+06	39.44	4.01286e+06	3.58745e+06	49.53	1.06	0.08	0.505361	0.3	0.809141	0.328998	107.049	741.5	12.4
M107T80	3.65121e+07	3.28312e+07	47.61	4.26466e+07	3.65024e+07	41.29	0.86	-0.22	0.194872	0.71	0.56435	0.742202	106.951	80.2	1.3
M107T84	1.31153e+06	1.11077e+06	40.42	1.63435e+06	1.55344e+06	27.07	0.8	-0.32	0.104895	0.98	0.440144	1.17108	107.053	84.1	1.4
M108T115	1.16966e+06	1.2365e+06	34.62	1.94408e+06	1.86596e+06	39.89	0.6	-0.73	0.0498834	1.3	0.330421	1.61886	107.505	114.5	1.9
M108T86	1.37858e+07	1.54459e+07	25.81	1.5918e+07	1.57378e+07	9.99	0.87	-0.21	0.441803	0.35	0.769616	1.11808	108.011	85.8	1.4
M109T112	284602	280276	13.05	240503	235441	19.9	1.18	0.24	0.104895	0.98	0.440144	1.47944	109.032	112.1	1.9
M109T682	592456	504003	46.4	1.43323e+06	1.43782e+06	54.68	0.41	-1.27	0.0206682	1.68	0.228643	1.73372	109.101	681.7	11.4
M109T723	267645	296992	32.29	239688	266223	35.35	1.12	0.16	0.573737	0.24	0.846615	0.428642	109.065	722.7	12
M109T744	2.61048e+06	2.19654e+06	38.4	2.34962e+06	2.03274e+06	53.02	1.11	0.15	0.573737	0.24	0.846615	0.580667	109.101	744.2	12.4
M109T75	2.34872e+07	2.80527e+07	52.49	2.03133e+07	2.33837e+07	57.31	1.16	0.21	0.382284	0.42	0.730096	0.108299	109.076	74.6	1.2
M109T80	2.51256e+06	2.4288e+06	26.22	2.67551e+06	2.68724e+06	31.88	0.94	-0.09	0.720901	0.14	0.912378	0.188231	108.949	80.3	1.3
M109T89	2.74172e+06	2.76884e+06	31.68	2.41527e+06	2.53936e+06	15.91	1.14	0.18	0.382284	0.42	0.730096	0.477091	109.028	88.8	1.5
M110T122	6.04591e+06	6.26026e+06	71.19	5.08515e+06	4.97741e+06	62.62	1.19	0.25	0.573737	0.24	0.846615	0.247497	110.035	121.9	2
M110T552	356169	371312	65.42	294093	322935	57.57	1.21	0.28	0.441803	0.35	0.769616	0.107521	110.105	551.9	9.2
M110T566	672067	535894	55.26	483067	321628	82.21	1.39	0.48	0.194872	0.71	0.56435	1.01832	110.027	566.3	9.4
M110T67	1.34942e+07	1.36486e+07	3.65	1.34724e+07	1.34252e+07	2.24	1	0	0.95913	0.02	0.990641	0.0101317	110.021	66.9	1.1
M110T68	298509	183002	86.72	498747	388282	98.57	0.6	-0.74	0.573737	0.24	0.846615	0.42949	109.597	68.1	1.1
M110T72	2.0182e+08	2.22492e+08	43.19	2.23335e+08	2.15949e+08	45.63	0.9	-0.15	0.720901	0.14	0.912378	0.380983	110.009	71.7	1.2
M110T73	2.03296e+06	2.27546e+06	43.49	1.4729e+06	1.346e+06	55.04	1.38	0.46	0.278632	0.55	0.649698	0.878537	109.979	72.9	1.2
M110T797	9.21866e+08	8.69506e+08	41.2	1.11788e+09	1.01636e+09	62.03	0.82	-0.28	0.878477	0.06	0.967431	0.319007	110.02	797.4	13.3
M110T811	1.17136e+08	9.87046e+07	45.37	6.14615e+07	5.36071e+07	69.28	1.91	0.93	0.0206682	1.68	0.228643	1.71332	110.02	811.1	13.5
M110T86	1.55564e+07	1.56856e+07	61	3.23142e+07	3.41888e+07	28.82	0.48	-1.05	0.014763	1.83	0.200021	1.69269	110.027	85.6	1.4
M111T104	2.92938e+06	2.93916e+06	14.79	2.55838e+06	2.63749e+06	22.29	1.15	0.2	0.234499	0.63	0.606344	1.10019	111.044	104.3	1.7
M111T481	1.26042e+07	1.22808e+07	23.14	1.54846e+07	1.58011e+07	32.48	0.81	-0.3	0.130381	0.88	0.480121	0.809509	111.117	480.7	8
M111T629	1.25791e+06	918115	75.64	1.02494e+06	1.13684e+06	30.68	1.23	0.3	1	0	1	0.0739552	111.044	628.7	10.5
M111T64	8.45255e+06	7.25134e+06	87.06	8.67911e+06	7.5196e+06	90.73	0.97	-0.04	0.878477	0.06	0.967431	0.403056	111.117	63.8	1.1
M111T72	1.83042e+07	1.98841e+07	51.95	2.41876e+07	2.56135e+07	24.97	0.76	-0.4	0.382284	0.42	0.730096	1.12163	111.01	71.7	1.2
M111T801	2.12098e+09	2.06448e+09	20.93	1.94585e+09	1.46982e+09	48.82	1.09	0.12	0.234499	0.63	0.606344	0.687884	111.019	801.1	13.4
M111T818	4.06719e+06	4.02629e+06	33.37	6.48873e+06	6.41045e+06	32.21	0.63	-0.67	0.0498834	1.3	0.330421	1.75022	111.117	817.6	13.6
M112T104	1.71918e+06	1.69154e+06	20.84	2.28473e+06	2.26311e+06	15.84	0.75	-0.41	0.004662	2.33	0.129379	1.88864	112.076	103.6	1.7
M112T110	644960	431633	70.11	687887	393710	87.81	0.94	-0.09	0.798446	0.1	0.941385	0.0187294	112.039	110.4	1.8
M112T118	3.42052e+08	3.57689e+08	32.58	4.47371e+08	4.21556e+08	65.97	0.76	-0.39	0.573737	0.24	0.846615	0.274915	112.05	118.1	2
M112T423	892585	852864	48.84	1.08977e+06	743393	90.18	0.82	-0.29	0.878477	0.06	0.967431	0.267058	112.05	422.8	7
M112T481	437122	427539	31.76	1.08151e+06	862294	107.86	0.4	-1.31	0.234499	0.63	0.606344	0.943516	112.12	480.8	8
M112T67	887038	855073	15.28	892568	911046	11.81	0.99	-0.01	0.720901	0.14	0.912378	0.11837	112.112	66.7	1.1
M112T73	3.12628e+07	2.1019e+07	86.25	2.51726e+07	2.01123e+07	60.9	1.24	0.31	0.798446	0.1	0.941385	0.250893	112.087	73.1	1.2
M112T801	6.87851e+08	6.29365e+08	18.31	7.04649e+08	8.13939e+08	41.4	0.98	-0.03	0.798446	0.1	0.941385	0.225218	112.019	801.2	13.4
M112T802	2.67732e+07	2.1162e+07	41.74	3.24699e+07	3.18353e+07	33.73	0.82	-0.28	0.234499	0.63	0.606344	0.949547	111.52	802.4	13.4
M112T814	5.96027e+07	5.45151e+07	44.28	5.10309e+07	5.57162e+07	42.52	1.17	0.22	0.878477	0.06	0.967431	0.626381	111.522	814	13.6
M112T99	7296905	7.30806e+06	3.83	7.62728e+06	7.50088e+06	8.89	0.96	-0.06	0.505361	0.3	0.809141	0.91565	112.05	99.2	1.7
M113T115	2.01854e+06	1.60813e+06	72.79	531148	411052	81.78	3.8	1.93	0.0018648	2.73	0.096514	2.11143	113.071	114.7	1.9
M113T118	1.25415e+07	3.73518e+06	133.38	1.0315e+07	3.82471e+06	106.66	1.22	0.28	0.441803	0.35	0.769616	0.0987997	113.054	118	2
M113T122	1.40488e+08	1.2776e+08	60.64	1.09859e+08	1.04385e+08	43.24	1.28	0.35	0.645377	0.19	0.878848	0.325927	113.035	122.2	2
M113T174	2.95681e+07	3.00397e+07	25.76	3.4e+07	3.42166e+07	16.36	0.87	-0.2	0.278632	0.55	0.649698	0.981371	113.035	173.9	2.9
M113T315	1.31767e+07	1.3359e+07	17.03	1.41803e+07	1.14546e+07	39.46	0.93	-0.11	0.720901	0.14	0.912378	0.162041	113.029	314.8	5.2
M113T449	1.28126e+06	1.25731e+06	49.84	1.21308e+06	930908	56.17	1.06	0.08	0.798446	0.1	0.941385	0.111112	113.096	448.7	7.5
M113T72	1.09784e+06	1.05254e+06	15.05	1.103e+06	1.10346e+06	9.39	1	-0.01	0.720901	0.14	0.912378	0.145373	113.01	71.8	1.2
M113T724	821818	857747	12.91	389155	351193	44.22	2.11	1.08	0.000621601	3.21	0.069967	2.38519	113.06	723.8	12.1
M113T73	832315	1.09097e+06	58.91	1.06054e+06	1.03467e+06	37.01	0.78	-0.35	0.382284	0.42	0.730096	0.942682	113.09	73.1	1.2
M113T776	6.61203e+06	5.6995e+06	28.41	6.21929e+06	5.46203e+06	42.93	1.06	0.09	0.382284	0.42	0.730096	0.527428	113.06	775.8	12.9
M113T787	5.84428e+06	6.11112e+06	26.25	3.72286e+06	3.98196e+06	19.9	1.57	0.65	0.0104118	1.98	0.169968	2.04801	113.06	786.6	13.1
M113T83	5.34284e+06	6.21903e+06	67.92	4.94498e+06	6.97201e+06	81.34	1.08	0.11	0.878477	0.06	0.967431	0.332586	112.896	82.9	1.4
M113T89_1	3.20187e+07	3.09188e+07	22.73	4.15004e+07	4.23544e+07	34.12	0.77	-0.37	0.130381	0.88	0.480121	1.01551	113	89.1	1.5
M113T89_2	3.15286e+06	3.00111e+06	26.47	2.288e+06	2.33969e+06	17.65	1.38	0.46	0.0206682	1.68	0.228643	1.76469	113.071	89	1.5
M114T108	5.80218e+06	5.9283e+06	26.59	9.06801e+06	8.39326e+06	44.22	0.64	-0.64	0.0649573	1.19	0.368412	1.55479	114.091	107.6	1.8
M114T121	1.01959e+07	1.06745e+07	41.05	1.13744e+07	1.20245e+07	45.26	0.9	-0.16	0.505361	0.3	0.809141	0.194456	114.055	121.4	2
M114T130	1.64795e+07	1.33463e+07	76.99	2.62198e+07	1.8748e+07	82.22	0.63	-0.67	0.278632	0.55	0.649698	0.660309	114.065	129.9	2.2
M114T143	6.82804e+07	6.69032e+07	16.36	7.50091e+07	7.08028e+07	20.38	0.91	-0.14	0.328205	0.48	0.69011	0.767045	114.065	143.4	2.4
M114T156	1.20636e+07	1.19111e+07	21.81	1.04255e+07	1.0439e+07	44.56	1.16	0.21	0.645377	0.19	0.878848	0.797711	114.065	156.5	2.6
M114T165	4.39052e+07	4.29173e+07	20.51	4.57618e+07	4.54135e+07	8.85	0.96	-0.06	0.573737	0.24	0.846615	0.520909	114.065	164.7	2.7
M114T174	3.71634e+06	3.85007e+06	14.48	4.20342e+06	4.36181e+06	17.38	0.88	-0.18	0.160528	0.79	0.521677	1.01956	114.038	173.9	2.9
M114T194	9.55732e+07	9.9351e+07	21.09	9.68247e+07	8.23478e+07	41.49	0.99	-0.02	0.720901	0.14	0.912378	0.149175	114.065	193.7	3.2
M114T208	3.54572e+07	3.56709e+07	10.55	2.17331e+07	1.91672e+07	54.11	1.63	0.71	0.0379176	1.42	0.297283	1.8624	114.065	208.3	3.5
M114T232	2.7019e+07	2.73683e+07	11.88	2.76669e+07	2.72387e+07	15.13	0.98	-0.03	0.878477	0.06	0.967431	0.148144	114.065	232.4	3.9
M114T249	9.71761e+06	878044	173.32	1.00956e+07	619360	177.79	0.96	-0.06	0.573737	0.24	0.846615	0.142744	114.065	249.1	4.2
M114T315	814562	608746	72.34	1.51453e+06	1.32838e+06	51.93	0.54	-0.89	0.0379176	1.42	0.297283	1.58005	114.037	314.7	5.2
M114T338	3.38817e+08	3.27142e+08	16.1	1.0125e+08	86782182	104.5	3.35	1.74	0.0001554	3.81	0.0532196	1.93845	114.065	338.2	5.6
M114T342	1.9526e+07	1.86884e+07	13.74	1.33249e+07	1.26577e+07	56.67	1.47	0.55	0.104895	0.98	0.440144	1.5884	114.128	342.4	5.7
M114T35	4.02086e+07	3.33916e+07	43.85	4.35482e+07	3.71452e+07	42.91	0.92	-0.12	0.505361	0.3	0.809141	0.449546	113.963	34.8	0.6
M114T384	5.72384e+07	5.63331e+07	22.42	6.43165e+07	6.15129e+07	31.37	0.89	-0.17	0.573737	0.24	0.846615	0.494205	114.065	384.1	6.4
M114T402	2.7612e+07	2.08971e+07	70.87	2.21108e+07	1.82226e+07	51.91	1.25	0.32	0.645377	0.19	0.878848	0.370431	114.065	402.4	6.7
M114T419	3.00001e+07	2.41111e+07	57.61	3.52065e+07	3.71076e+07	34.28	0.85	-0.23	0.382284	0.42	0.730096	0.60091	114.092	418.6	7
M114T427	3.18541e+07	3.24613e+07	35.29	5.15263e+07	4.11421e+07	49.06	0.62	-0.69	0.104895	0.98	0.440144	1.47554	114.065	427	7.1
M114T442	1.57614e+07	1.56943e+07	20.39	1.27345e+07	1.42277e+07	33.05	1.24	0.31	0.278632	0.55	0.649698	1.12679	114.065	442	7.4
M114T463	838952	850652	30.88	1.11165e+06	1.06853e+06	71.92	0.75	-0.41	0.328205	0.48	0.69011	0.0688912	114.128	463.4	7.7
M114T473	1.40773e+08	1.84445e+08	62.26	7.96444e+07	5.53897e+07	59.4	1.77	0.82	0.194872	0.71	0.56435	0.463912	114.065	472.6	7.9
M114T534	9.69782e+07	9.21817e+07	46.22	5.78941e+07	5.28273e+07	72.93	1.68	0.74	0.0649573	1.19	0.368412	1.33399	114.065	534.1	8.9
M114T554	1.39735e+07	1.2857e+07	38.44	1.35637e+07	1.26706e+07	31.12	1.03	0.04	0.878477	0.06	0.967431	0.0433252	114.065	553.6	9.2
M114T566	3.37635e+07	3.70484e+07	48.62	3.04617e+07	2.71679e+07	72.2	1.11	0.15	0.720901	0.14	0.912378	0.539271	114.065	565.7	9.4
M114T577	5.99341e+07	5.67686e+07	25.32	1.40522e+08	1.38016e+08	49.6	0.43	-1.23	0.00699301	2.16	0.14968	2.00385	114.065	576.7	9.6
M114T592	4.8027e+07	4.58096e+07	18.41	3.52766e+07	3.6452e+07	33.62	1.36	0.45	0.0498834	1.3	0.330421	1.64064	114.065	592.3	9.9
M114T607	6.57212e+07	6.02151e+07	42.26	5.65578e+07	5.65208e+07	45.45	1.16	0.22	0.234499	0.63	0.606344	0.597726	114.065	606.6	10.1
M114T618	6.43405e+07	5.48582e+07	31.94	8.77077e+07	8.73606e+07	44.27	0.73	-0.45	0.278632	0.55	0.649698	0.955614	114.065	618.2	10.3
M114T634	8.59724e+07	7.97425e+07	24.08	7.44257e+07	7.73522e+07	28.94	1.16	0.21	0.505361	0.3	0.809141	0.926972	114.065	634.3	10.6
M114T64	2.0444e+07	2.05027e+07	25.09	1.96005e+07	1.9273e+07	17.5	1.04	0.06	0.798446	0.1	0.941385	0.256938	114.091	63.8	1.1
M114T649	4.23549e+07	4.21494e+07	32.92	4.16593e+07	3.68245e+07	54.33	1.02	0.02	0.645377	0.19	0.878848	0.33985	114.065	648.7	10.8
M114T660	3.61942e+07	36449602	33.9	5.47685e+07	4.66669e+07	51.99	0.66	-0.6	0.160528	0.79	0.521677	1.20646	114.065	659.7	11
M114T678	2.15526e+07	2.0777e+07	45.1	1.7533e+07	1.32907e+07	52.93	1.23	0.3	0.234499	0.63	0.606344	0.614018	114.065	678.3	11.3
M114T68	5.62168e+07	6.09508e+07	24.41	5.25615e+07	5.62542e+07	22.03	1.07	0.1	0.441803	0.35	0.769616	0.330775	113.963	67.7	1.1
M114T686	4.96998e+07	5.34967e+07	20.44	5.27401e+07	5.47898e+07	31.78	0.94	-0.09	0.720901	0.14	0.912378	0.169621	114.065	686.1	11.4
M114T698	4.81043e+07	5.16774e+07	31.59	4.14519e+07	4.19015e+07	36.55	1.16	0.21	0.441803	0.35	0.769616	0.703189	114.065	698.5	11.6
M114T731	6.00229e+07	6.00782e+07	28.61	5.94001e+07	5.73322e+07	26.85	1.01	0.02	0.95913	0.02	0.990641	0.0423897	114.065	730.8	12.2
M114T752	4.50755e+07	4.26881e+07	36.61	4.38407e+07	4.22541e+07	32.91	1.03	0.04	0.720901	0.14	0.912378	0.0253308	114.065	752	12.5
M114T799	2.67757e+08	2.66203e+08	6.2	2.06921e+08	2.2539e+08	26.17	1.29	0.37	0.00699301	2.16	0.14968	1.72599	113.963	798.9	13.3
M114T813	1.36416e+08	1.41356e+08	28.26	1.51998e+08	1.36453e+08	46.19	0.9	-0.16	0.878477	0.06	0.967431	0.24638	114.065	813.1	13.6
M114T92	1.10563e+09	1.00308e+09	80.16	1.67294e+09	1.7048e+09	47.36	0.66	-0.6	0.194872	0.71	0.56435	0.949394	114.066	91.7	1.5
M115T309	8.76154e+07	9.30025e+07	60.52	1.30921e+08	1.31596e+08	20.18	0.67	-0.58	0.194872	0.71	0.56435	1.5126	115.039	309.4	5.2
M115T36	2.96272e+06	2.93087e+06	4.78	2.86083e+06	2.89746e+06	6.41	1.04	0.05	0.645377	0.19	0.878848	0.926742	114.971	35.7	0.6
M115T377	774234	750136	12.57	837946	762069	19.75	0.92	-0.11	0.798446	0.1	0.941385	0.650381	115.039	377.3	6.3
M115T387	808587	419181	87.08	2.28641e+06	2.00334e+06	47.5	0.35	-1.5	0.0104118	1.98	0.169968	2.10446	115.075	387.4	6.5
M115T397	562397	544465	66.59	671432	625993	50.38	0.84	-0.26	0.573737	0.24	0.846615	0.597293	115.054	397.1	6.6
M115T419	1.2866e+06	1.32054e+06	36.03	1.5802e+06	1.64496e+06	31.84	0.81	-0.3	0.234499	0.63	0.606344	0.836423	115.095	418.7	7
M115T487	880424	715843	59.92	676843	581771	61.55	1.3	0.38	0.505361	0.3	0.809141	0.903638	115.075	487.4	8.1
M115T72	2.38204e+06	2.16989e+06	18.62	2.28571e+06	2.33209e+06	9.4	1.04	0.06	0.95913	0.02	0.990641	0.34964	114.988	71.8	1.2
M115T76	2.04922e+06	2.00535e+06	9.29	2.03819e+06	1.97268e+06	12.76	1.01	0.01	0.645377	0.19	0.878848	0.0969517	115.087	76	1.3
M115T89	2.48118e+06	2.54914e+06	31.71	1.15903e+06	1.18253e+06	18.24	2.14	1.1	0.0003108	3.51	0.0568482	2.40528	115.087	89	1.5
M115T92	3.37218e+07	3.19376e+07	71.71	4.66022e+07	3.87321e+07	38.72	0.72	-0.47	0.160528	0.79	0.521677	1.03962	115.07	91.7	1.5
M115T94	8.85083e+06	6.39695e+06	99.55	4.1147e+06	3206528	94.15	2.15	1.11	0.328205	0.48	0.69011	0.634464	115.05	94.2	1.6
M116T100	657622	673592	82.05	994482	924314	63.05	0.66	-0.6	0.441803	0.35	0.769616	0.993883	116.082	99.8	1.7
M116T103	8.76759e+06	8.43242e+06	43.85	1.05987e+07	9.7862e+06	32.91	0.83	-0.27	0.441803	0.35	0.769616	0.821628	116.107	103.1	1.7
M116T309	1.76498e+06	737145	166.31	3.93751e+06	3.87074e+06	62.99	0.45	-1.16	0.0379176	1.42	0.297283	1.6504	116.042	309.1	5.2
M116T356	1.56612e+06	1.657e+06	15.57	1.35065e+06	1.30593e+06	10.38	1.16	0.21	0.0498834	1.3	0.330421	1.45535	116.034	356.4	5.9
M116T363	639213	491773	101.35	626333	486731	79.19	1.02	0.03	0.798446	0.1	0.941385	0.166376	115.574	362.6	6
M116T76	8.1449e+06	8.11346e+06	8.49	1.01825e+07	1.02954e+07	22	0.8	-0.32	0.0649573	1.19	0.368412	1.61996	116.07	75.9	1.3
M116T787	1.51826e+06	1.18746e+06	83.85	1.30855e+06	951923	67.13	1.16	0.21	0.720901	0.14	0.912378	0.171609	116.053	786.8	13.1
M116T800	1.5035e+06	1.43717e+06	29.6	1.45185e+06	1.17167e+06	42.77	1.04	0.05	0.720901	0.14	0.912378	0.342772	115.964	799.5	13.3
M116T806	2.2821e+06	2.50324e+06	43.61	1.70902e+06	1.30975e+06	67.63	1.34	0.42	0.234499	0.63	0.606344	0.993608	115.964	806.4	13.4
M116T85	2.83759e+07	2.81981e+07	10.42	2.47928e+07	2.36858e+07	21.67	1.14	0.19	0.104895	0.98	0.440144	1.26059	116.034	85.1	1.4
M116T96	1.20079e+09	1.33984e+09	36.57	1.61792e+09	1.53547e+09	23.72	0.74	-0.43	0.160528	0.79	0.521677	1.41219	116.07	96.3	1.6
M117T108	1.60622e+07	1.5757e+07	9.38	1.35583e+07	1.35155e+07	14.1	1.18	0.24	0.0104118	1.98	0.169968	1.82199	116.966	107.7	1.8
M117T115	2.6905e+06	2.61631e+06	12.68	2.19428e+06	2.16848e+06	18.98	1.23	0.29	0.0206682	1.68	0.228643	1.72121	116.51	114.5	1.9
M117T266	8.49501e+06	8.69318e+06	17.97	5.60716e+06	5.67862e+06	12.53	1.52	0.6	0.0001554	3.81	0.0532196	2.40938	116.966	266.3	4.4
M117T309	359535	255604	88.51	379343	99599.8	136.97	0.95	-0.08	0.573737	0.24	0.846615	0.559509	117.043	308.7	5.1
M117T334	342623	307127	65.33	270205	213319	70.95	1.27	0.34	0.441803	0.35	0.769616	0.0605263	117.055	334.1	5.6
M117T432	840498	835663	18	619102	644102	17	1.36	0.44	0.00699301	2.16	0.14968	1.92829	117.102	432.1	7.2
M117T756	1.30661e+07	1.22663e+07	53.32	9.61532e+06	9.01889e+06	53.23	1.36	0.44	0.505361	0.3	0.809141	0.929261	116.524	756.5	12.6
M117T90	1.7351e+06	1.6536e+06	35.49	1.12137e+06	1.07981e+06	21.51	1.55	0.63	0.0281274	1.55	0.261699	1.73086	117.055	90.2	1.5
M117T96	6.6504e+07	6.59032e+07	7.42	6.55729e+07	6.49442e+07	9.86	1.01	0.02	0.798446	0.1	0.941385	0.378581	117.074	96.3	1.6
M118T111	1.16158e+06	1.09711e+06	22	1.13021e+06	1.10644e+06	19.64	1.03	0.04	0.878477	0.06	0.967431	0.170568	118.123	111	1.9
M118T120	1.25394e+09	1.40048e+09	31.37	1.27348e+09	1.3769e+09	30.15	0.98	-0.02	0.878477	0.06	0.967431	0.100227	118.086	120.2	2
M118T308	183606	104452	98.15	209771	238557	71.75	0.88	-0.19	0.720901	0.14	0.912378	0.0713988	118.023	308.3	5.1
M118T339	1.46526e+06	1.27789e+06	76.16	1.87862e+06	1.57001e+06	75.98	0.78	-0.36	0.798446	0.1	0.941385	0.261685	118.065	338.5	5.6
M118T35	3.48279e+07	3.44309e+07	5.78	3.16685e+07	3.1203e+07	12.2	1.1	0.14	0.0829837	1.08	0.403171	1.43861	118.085	35.3	0.6
M118T399	5.32106e+06	5.35112e+06	45.21	1.51119e+07	1.33504e+07	58.49	0.35	-1.51	0.0104118	1.98	0.169968	2.01441	118.065	399.3	6.7
M118T89	4.1629e+06	4.37722e+06	15.47	4.00884e+06	4.29059e+06	26.19	1.04	0.05	1	0	1	0.409336	118.061	88.8	1.5
M118T90	2.05112e+08	1.53979e+08	91.59	2.83344e+08	2.04801e+08	78.32	0.72	-0.47	0.505361	0.3	0.809141	0.696858	118.086	90.4	1.5
M118T97	2.63306e+06	1.29008e+06	109.65	2.9421e+06	1834734	126.93	0.89	-0.16	0.878477	0.06	0.967431	0.139323	118.075	96.7	1.6
M119T105	1.8339e+07	1.92141e+07	18.93	4.67652e+06	1.63142e+06	116.84	3.92	1.97	0.0003108	3.51	0.0568482	2.11672	119.016	104.8	1.7
M119T120	8.0094e+07	7.89766e+07	8.83	6.46965e+07	6.67979e+07	19.99	1.24	0.31	0.0104118	1.98	0.169968	1.82081	119.09	120.2	2
M119T125	9.31098e+06	9.71911e+06	19.81	9.50828e+06	8.84128e+06	43.74	0.98	-0.03	0.441803	0.35	0.769616	0.186884	119.049	124.5	2.1
M119T139	4.56502e+06	4.094e+06	38.75	2.7991e+06	3.01191e+06	64.11	1.63	0.71	0.0649573	1.19	0.368412	1.4692	119.049	139.2	2.3
M119T191	2.98391e+06	2.96925e+06	15.5	2.95624e+06	3.00441e+06	27.93	1.01	0.01	0.720901	0.14	0.912378	0.308248	119.049	190.9	3.2
M119T400	1.28409e+07	1.38042e+07	21.07	1.27543e+07	1.18041e+07	72.75	1.01	0.01	1	0	1	0.676549	119.073	399.5	6.7
M119T585	847318	772328	49.03	774186	753293	15.01	1.09	0.13	0.645377	0.19	0.878848	0.190017	119.049	584.9	9.7
M119T64	372554	412462	24.6	301317	296871	34.57	1.24	0.31	0.160528	0.79	0.521677	0.973967	119.085	64.2	1.1
M119T699	252884	303855	41.05	250475	228009	49.02	1.01	0.01	0.798446	0.1	0.941385	0.0568532	119.049	699.3	11.7
M119T72	985798	1.34168e+06	70.53	1.41739e+06	1.42004e+06	14.32	0.7	-0.52	0.441803	0.35	0.769616	1.35372	119.014	71.7	1.2
M119T73	2.08585e+06	1.47749e+06	84.57	2.0351e+06	1.57312e+06	72.62	1.02	0.04	0.95913	0.02	0.990641	0.225721	118.984	73	1.2
M119T760	6.19947e+06	6.6571e+06	24.07	6.16865e+06	5.96949e+06	18.49	1	0.01	0.878477	0.06	0.967431	0.139219	119.014	759.5	12.7
M119T790	6.09049e+06	5.72629e+06	44.06	1.05164e+07	1.09589e+07	19.62	0.58	-0.79	0.004662	2.33	0.129379	1.98237	119.014	789.6	13.2
M119T802_1	1.64823e+06	1.60144e+06	25.89	1.61801e+06	1.71927e+06	27.5	1.02	0.03	0.878477	0.06	0.967431	0.172912	119.014	802.3	13.4
M119T802_2	2.48844e+06	2.53574e+06	52.16	4.05577e+06	3.87999e+06	44.03	0.61	-0.7	0.0498834	1.3	0.330421	1.39332	119.084	801.6	13.4
M119T813	1.10831e+06	1.26108e+06	24.41	960625	983499	35.79	1.15	0.21	0.278632	0.55	0.649698	0.87191	119.084	812.7	13.5
M120T100	7.82947e+06	7.62059e+06	10.07	7.47912e+06	7.36467e+06	9.17	1.05	0.07	0.278632	0.55	0.649698	0.760201	120.066	99.7	1.7
M120T120	4.23373e+06	4146241	31.53	4.26194e+06	3.9854e+06	32.53	0.99	-0.01	0.95913	0.02	0.990641	0.0926877	120.091	120	2
M120T338	9.32764e+08	8.94053e+08	26.21	7.26929e+08	7.23242e+08	21.41	1.28	0.36	0.0829837	1.08	0.403171	1.40643	120.081	338.3	5.6
M120T342	88528	97509.3	77.64	77752.9	95609.2	71.97	1.14	0.19	0.798446	0.1	0.941385	0.171219	120.044	341.9	5.7
M120T83	1.9092e+06	1.81608e+06	20	1.6182e+06	1.73911e+06	43.92	1.18	0.24	0.505361	0.3	0.809141	0.930454	120.102	83.4	1.4
M120T87	2.30274e+08	2.36976e+08	26.59	1.86337e+08	1.71792e+08	24.64	1.24	0.31	0.234499	0.63	0.606344	1.20595	120.066	87.4	1.5
M121T124	10588833	1.05919e+07	10.36	1.06448e+07	1.07127e+07	28.34	0.99	-0.01	0.878477	0.06	0.967431	0.264613	121.051	124.2	2.1
M121T133	911821	933697	37.57	748918	678442	55.76	1.22	0.28	0.441803	0.35	0.769616	0.833443	121.051	133.5	2.2
M121T338_1	5.35736e+06	5.79017e+06	53.24	2.58639e+06	2.66205e+06	56.47	2.07	1.05	0.0829837	1.08	0.403171	1.37126	121.065	338.2	5.6
M121T338_2	1.45558e+08	1.38225e+08	46.09	1.45167e+08	1.4826e+08	38.6	1	0	0.95913	0.02	0.990641	0.0769411	121.084	338.4	5.6
M121T90	1.18339e+07	1.17213e+07	23.42	1.48232e+07	1.61946e+07	34.5	0.8	-0.32	0.278632	0.55	0.649698	0.945468	121.07	90.4	1.5
M122T338	2.08253e+06	2.00755e+06	16.86	2.30249e+06	2.27467e+06	10.4	0.9	-0.14	0.194872	0.71	0.56435	1.18619	122.088	338.4	5.6
M122T34	1.23049e+07	1.35035e+07	35.97	1.33217e+07	1.31553e+07	23.2	0.92	-0.11	1	0	1	0.563895	121.972	33.9	0.6
M122T381	2.37254e+06	2.55952e+06	28.05	2.2986e+06	2.56018e+06	39.58	1.03	0.05	1	0	1	0.467463	122.097	380.8	6.3
M122T65	1.56579e+07	1.42272e+07	26.99	1.56872e+07	1.67934e+07	26.39	1	0	0.95913	0.02	0.990641	0.0347284	121.972	64.6	1.1
M123T122	3.81842e+09	3.95416e+09	29.59	4.62332e+09	4.39333e+09	34.39	0.83	-0.28	0.441803	0.35	0.769616	0.80394	123.055	121.8	2
M123T125	1.28536e+07	9.64272e+06	57.93	1.59282e+07	1.48284e+07	35.36	0.81	-0.31	0.0498834	1.3	0.330421	0.937771	123.044	125	2.1
M123T139	1.05227e+07	1.06442e+07	23.4	9.32787e+06	9.27828e+06	7.89	1.13	0.17	0.278632	0.55	0.649698	0.880673	123.044	139.5	2.3
M123T140	8.07303e+08	8.61882e+08	40.88	8.58103e+08	8.15845e+08	27.92	0.94	-0.09	0.95913	0.02	0.990641	0.565632	123.055	140.2	2.3
M123T191	1.04163e+07	1.05524e+07	37.55	8.07521e+06	7.92505e+06	27.57	1.29	0.37	0.234499	0.63	0.606344	0.909208	123.044	190.8	3.2
M123T33	474108	486791	43.83	400341	381344	36.92	1.18	0.24	0.573737	0.24	0.846615	0.377752	123.044	33.4	0.6
M123T472	3.40689e+07	3.22829e+07	26.92	2.99162e+07	2.60171e+07	36.54	1.14	0.19	0.234499	0.63	0.606344	0.792578	123.054	472.3	7.9
M123T81	2.93122e+08	2.79637e+08	20.98	3.5993e+08	2.94229e+08	51.72	0.81	-0.3	0.505361	0.3	0.809141	0.688069	122.925	80.9	1.3
M124T122_1	7.22089e+06	7.87845e+06	36.65	8.07196e+06	6.93283e+06	52.45	0.89	-0.16	0.878477	0.06	0.967431	0.195784	124.039	121.7	2
M124T122_2	1.68299e+08	7.76574e+07	93	2.09804e+08	1.93686e+08	75.1	0.8	-0.32	0.441803	0.35	0.769616	0.697378	124.059	121.8	2
M124T140	1.13324e+08	9.47539e+07	31.92	3.5505e+07	2.21458e+07	90.7	3.19	1.67	0.000621601	3.21	0.069967	2.1555	124.059	140	2.3
M124T72_1	2.23353e+06	1.98546e+06	29.2	2.12559e+06	2.29777e+06	35.62	1.05	0.07	1	0	1	0.306677	124.024	71.8	1.2
M124T808	2.40401e+07	2.59434e+07	40.29	1.85412e+07	1.90082e+07	43.04	1.3	0.37	0.278632	0.55	0.649698	0.871523	124.087	808.5	13.5
M124T81	3.25492e+06	3.2351e+06	11.23	3.65725e+06	3.64954e+06	21.53	0.89	-0.17	0.382284	0.42	0.730096	0.90603	123.928	80.9	1.3
M124T83_2	2.90316e+06	2.84977e+06	13.65	3.163e+06	3.04506e+06	20.9	0.92	-0.12	0.95913	0.02	0.990641	0.658967	124.096	83.2	1.4
M124T91	769109	830846	29.2	852241	845947	9.99	0.9	-0.15	0.645377	0.19	0.878848	0.78355	123.989	91.5	1.5
M125T122	8256634	7.81906e+06	26.96	1.03508e+07	9.23496e+06	44.83	0.8	-0.33	0.645377	0.19	0.878848	0.808698	125.06	121.9	2
M125T344	985284	581939	96.72	908554	565449	92.98	1.08	0.12	0.645377	0.19	0.878848	0.216746	125.071	344.1	5.7
M125T72	1.22915e+07	1.27366e+07	45.83	8.53541e+06	8.43981e+06	55.22	1.44	0.53	0.130381	0.88	0.480121	1.02238	125.038	71.7	1.2
M125T81	3.11668e+07	2.41726e+07	37.26	7.18787e+07	8.85553e+07	60.64	0.43	-1.21	0.234499	0.63	0.606344	1.38779	124.923	80.9	1.3
M126T114_1	1.29597e+07	5.75461e+06	91.71	1.49648e+07	1.74945e+07	67.45	0.87	-0.21	0.878477	0.06	0.967431	0.211553	126.022	113.6	1.9
M126T114_2	1.8245e+06	541302	119.69	1.14564e+06	254634	151.95	1.59	0.67	0.194872	0.71	0.56435	0.939199	126.055	114.2	1.9
M126T127	1.65236e+07	1.57924e+07	30.86	1.95331e+07	2.02045e+07	46.48	0.85	-0.24	0.645377	0.19	0.878848	0.426311	126.022	127.4	2.1
M126T315	9.32686e+06	9.51904e+06	19.46	1.10706e+07	1.11268e+07	26.43	0.84	-0.25	0.160528	0.79	0.521677	0.906	126.037	314.8	5.2
M126T634	6.96e+06	6.92975e+06	36.05	6.03181e+06	5.91123e+06	45.58	1.15	0.21	0.278632	0.55	0.649698	0.634402	125.985	633.9	10.6
M126T65	7.57531e+06	7.25002e+06	13.96	6.8727e+06	6.93715e+06	16.06	1.1	0.14	0.573737	0.24	0.846615	0.919394	126.055	65.1	1.1
M126T72	1.47273e+08	1.45378e+08	5.92	1.4323e+08	1.4749e+08	8.7	1.03	0.04	0.720901	0.14	0.912378	0.657678	125.986	72.2	1.2
M126T75	1.61462e+08	1.64751e+08	29.4	1.53482e+08	1.59916e+08	29.19	1.05	0.07	0.720901	0.14	0.912378	0.284796	126.102	74.7	1.2
M126T86	8.4828e+08	8.36349e+08	50.99	7.81136e+08	7.24184e+08	51.8	1.09	0.12	0.720901	0.14	0.912378	0.178406	126.022	85.7	1.4
M126T99	7.30971e+07	70591458	22.94	6.44426e+07	6.63791e+07	36.16	1.13	0.18	0.505361	0.3	0.809141	0.697864	126.022	99.4	1.7
M127T101_1	3.61585e+06	3.69155e+06	27.96	3.77817e+06	3.75098e+06	22.41	0.96	-0.06	0.645377	0.19	0.878848	0.350828	127.016	100.6	1.7
M127T101_2	3.18121e+07	3.15144e+07	24.47	1.64641e+07	1.92579e+07	47.18	1.93	0.95	0.0010878	2.96	0.0833774	1.83932	127.039	101.1	1.7
M127T135	4.13606e+07	4.16171e+07	6.22	4.12369e+07	4.08645e+07	18.37	1	0	0.878477	0.06	0.967431	0.187586	127.039	135.5	2.3
M127T244	3.28873e+06	3.56455e+06	33.23	3.65689e+06	3.64577e+06	8.88	0.9	-0.15	0.573737	0.24	0.846615	0.7811	127.05	244.2	4.1
M127T335	1.00784e+07	9.90588e+06	13.18	5.18742e+06	3.00598e+06	68.96	1.94	0.96	0.0379176	1.42	0.297283	2.06764	127.05	335	5.6
M127T552	1.6661e+06	1.83259e+06	73.25	1.41819e+06	1.3114e+06	73.04	1.17	0.23	0.505361	0.3	0.809141	0.110837	127.112	551.9	9.2
M127T604	281847	162238	92.79	223435	230194	48.03	1.26	0.34	0.798446	0.1	0.941385	0.164143	127.016	603.6	10.1
M127T682	1.12653e+06	1.09904e+06	66.07	388961	205431	116.95	2.9	1.53	0.0379176	1.42	0.297283	1.67648	127.112	681.6	11.4
M127T72_1	1.33938e+06	1.32531e+06	36.99	1.68807e+06	1.58594e+06	49.21	0.79	-0.33	0.645377	0.19	0.878848	0.575793	126.595	72.4	1.2
M127T72_2	4.6576e+06	4.49034e+06	28.42	5.44027e+06	5.39085e+06	24.06	0.86	-0.22	0.278632	0.55	0.649698	0.944302	126.99	72.3	1.2
M127T72_3	2.48021e+06	2.42161e+06	14.03	2.63676e+06	2.6654e+06	8.57	0.94	-0.09	0.441803	0.35	0.769616	0.843324	127.003	71.6	1.2
M127T740	4.36533e+06	3.92807e+06	36.61	3.91012e+06	3.07801e+06	51.68	1.12	0.16	0.441803	0.35	0.769616	0.601769	126.972	740.3	12.3
M127T75	9.17671e+06	8.54346e+06	47.72	7.82475e+06	7.88762e+06	44.27	1.17	0.23	0.720901	0.14	0.912378	0.44402	127.106	74.7	1.2
M127T751	1.13882e+07	1.09667e+07	24.33	6.40215e+06	5.73519e+06	66.95	1.78	0.83	0.014763	1.83	0.200021	1.74902	126.972	751.5	12.5
M127T763	6.2608e+06	6.39182e+06	26.01	5.66722e+06	5.64225e+06	37.72	1.1	0.14	0.573737	0.24	0.846615	0.583925	126.972	763	12.7
M127T774	1.30883e+07	1.16253e+07	39.71	1.44227e+07	1.39659e+07	36.56	0.91	-0.14	0.573737	0.24	0.846615	0.45591	126.972	774.3	12.9
M127T807	2.54475e+06	2.5319e+06	36.4	1.93504e+06	1.89812e+06	19.05	1.32	0.4	0.130381	0.88	0.480121	1.07311	126.972	807	13.4
M127T86	3.81992e+07	3.59846e+07	17.81	3.64806e+07	3.64349e+07	21.07	1.05	0.07	0.798446	0.1	0.941385	0.433674	127.025	85.7	1.4
M127T89	1.70763e+07	1.7126e+07	9.39	1.82318e+07	1.82477e+07	10.48	0.94	-0.09	0.328205	0.48	0.69011	0.949673	127.039	88.8	1.5
M128T36	1.58479e+06	1.23574e+06	49.41	1.69016e+06	1.67621e+06	26.21	0.94	-0.09	0.441803	0.35	0.769616	0.463324	128.043	36	0.6
M128T364	3.50402e+06	3.10853e+06	37.85	3.34144e+06	3.21476e+06	23.65	1.05	0.07	1	0	1	0.146381	128.143	364.5	6.1
M128T606	441464	435335	34.33	429084	434591	51.86	1.03	0.04	0.645377	0.19	0.878848	0.430676	128.096	606	10.1
M128T72	3.13764e+08	2.89477e+08	29.19	3.30459e+08	3.12645e+08	23.23	0.95	-0.07	0.505361	0.3	0.809141	0.382039	128.019	71.8	1.2
M128T86	4.1221e+07	4.13046e+07	28.3	4.18092e+07	4.21117e+07	20.42	0.99	-0.02	0.95913	0.02	0.990641	0.185074	128.018	85.7	1.4
M129T104_1	8.92016e+06	9.6589e+06	30.06	1.23339e+07	1.08706e+07	28.05	0.72	-0.47	0.0498834	1.3	0.330421	1.38445	129.055	104.2	1.7
M129T104_2	1.31282e+06	1.1158e+06	42.24	1.58721e+06	1.54703e+06	50	0.83	-0.27	0.573737	0.24	0.846615	0.51778	129.074	104.2	1.7
M129T137	752946	762843	14.83	434509	367818	61.19	1.73	0.79	0.0379176	1.42	0.297283	1.84862	128.951	137	2.3
M129T240	2.62238e+07	2.88548e+07	37.48	2.53896e+07	2.47309e+07	21.32	1.03	0.05	0.441803	0.35	0.769616	0.147372	129.055	240.4	4
M129T260	2.74809e+07	1.83222e+07	76.68	2.18987e+07	2.26432e+07	61.12	1.25	0.33	0.95913	0.02	0.990641	0.599836	129.055	259.9	4.3
M129T404	4.65515e+06	3.55204e+06	91.69	3.46158e+06	3.32494e+06	76.92	1.34	0.43	0.645377	0.19	0.878848	0.410283	129.055	404.1	6.7
M129T428	515718	58235.3	174.9	436617	33005.9	167.24	1.18	0.24	0.382284	0.42	0.730096	0.390107	129.102	427.6	7.1
M129T599	2.71919e+06	1.74806e+06	83.96	3.07881e+06	2.53234e+06	71.91	0.88	-0.18	0.234499	0.63	0.606344	0.528208	129.127	598.7	10
M129T67	801169	784996	9.49	781162	830850	25.33	1.03	0.04	0.645377	0.19	0.878848	0.402372	129.139	66.9	1.1
M129T72	2.53407e+07	2.32085e+07	63.52	4.25314e+07	4.95107e+07	55.34	0.6	-0.75	0.194872	0.71	0.56435	0.897691	129.02	71.7	1.2
M129T76	7.17723e+06	7.23989e+06	5.91	7.51166e+06	7501457	13.92	0.96	-0.07	0.382284	0.42	0.730096	0.543823	129.102	76.3	1.3
M129T818	6.21566e+06	6.43578e+06	29.34	7.64443e+06	7.71575e+06	41.98	0.81	-0.3	0.382284	0.42	0.730096	0.677185	129.127	817.7	13.6
M130T100	4.68947e+07	4.67665e+07	15.62	5.1711e+07	5.23382e+07	15.04	0.91	-0.14	0.382284	0.42	0.730096	0.987197	130.05	99.9	1.7
M130T121	3.47254e+07	3.42665e+07	38.91	2.67069e+07	2.41728e+07	29.18	1.3	0.38	0.234499	0.63	0.606344	1.10364	130.086	120.9	2
M130T123	5.02296e+07	4.60562e+07	17.4	4.98455e+07	4.4022e+07	35.21	1.01	0.01	0.234499	0.63	0.606344	0.26311	130.05	122.7	2
M130T155	1.05028e+08	1.06345e+08	69.68	6.92665e+07	6.67523e+07	71.8	1.52	0.6	0.382284	0.42	0.730096	0.738869	130.05	155.2	2.6
M130T260	1.31797e+06	1.28314e+06	10.62	1.3245e+06	1.2883e+06	11.17	1	-0.01	1	0	1	0.11673	130.059	259.6	4.3
M130T397	5.51663e+06	3.9864e+06	59.64	3.97137e+06	3.62699e+06	60.18	1.39	0.47	0.328205	0.48	0.69011	1.01022	130.065	397.2	6.6
M130T435	448922	406159	31.56	485729	417101	33.72	0.92	-0.11	0.720901	0.14	0.912378	0.377791	130.123	434.5	7.2
M130T442	9.1715e+07	8.56984e+07	43.73	9.5641e+07	9.72431e+07	36.93	0.96	-0.06	0.645377	0.19	0.878848	0.152849	130.159	441.5	7.4
M130T613	973892	1.00906e+06	22.53	663322	468668	80.71	1.47	0.55	0.0498834	1.3	0.330421	1.51019	130.123	612.7	10.2
M130T72_1	4.4998e+06	4.36339e+06	8.27	3.90557e+06	3.96125e+06	17.93	1.15	0.2	0.0498834	1.3	0.330421	1.50945	129.979	72	1.2
M130T72_2	3.37262e+07	2.59175e+07	76.67	2.40024e+07	1.38172e+07	99.52	1.41	0.49	0.573737	0.24	0.846615	0.642413	130.017	71.7	1.2
M130T76	7.70535e+07	4.07868e+07	68.4	9.71131e+07	8.9044e+07	57.65	0.79	-0.33	0.328205	0.48	0.69011	0.62137	130.086	76.3	1.3
M130T815	1.67823e+08	1.48023e+08	45.58	2.90474e+08	2.83086e+08	56.98	0.58	-0.79	0.160528	0.79	0.521677	1.17492	130.159	815.2	13.6
M130T817	9.21007e+07	9.63946e+07	28.96	1.0909e+08	1.00096e+08	31.68	0.84	-0.24	0.720901	0.14	0.912378	0.862687	130.049	816.6	13.6
M130T838	5.47916e+07	5.67165e+07	35.53	6.36319e+07	6.05468e+07	24.95	0.86	-0.22	0.328205	0.48	0.69011	0.950329	130.049	838.1	14
M130T839	1.30418e+08	1.57659e+08	56.39	1.52321e+08	1.69255e+08	37.35	0.86	-0.22	0.645377	0.19	0.878848	0.707201	130.159	838.8	14
M130T86	7.70161e+08	7.66829e+08	12.93	7.79375e+08	7.83148e+08	6.87	0.99	-0.02	0.878477	0.06	0.967431	0.28288	130.05	85.7	1.4
M130T99	1.1459e+06	659525	67.85	2.87364e+06	2.93349e+06	48.11	0.4	-1.33	0.00699301	2.16	0.14968	1.88569	130.086	99.4	1.7
M131T114	1.47783e+06	1.15154e+06	38.84	1.50198e+06	1.57139e+06	39.64	0.98	-0.02	0.573737	0.24	0.846615	0.145148	131	114.3	1.9
M131T116	557458	562814	11.38	407377	395725	25.56	1.37	0.45	0.004662	2.33	0.129379	2.051	130.602	115.9	1.9
M131T123	196079	204605	18.86	1.57177e+06	875608	100.54	0.12	-3	0.0104118	1.98	0.169968	1.73601	131.053	123.3	2.1
M131T155	6.71015e+06	6.62163e+06	17.76	6.50356e+06	6.30864e+06	7.9	1.03	0.05	0.720901	0.14	0.912378	0.294841	131.053	155.3	2.6
M131T338	5.66445e+07	5.88753e+07	20.47	42711731	4.034e+07	33.76	1.33	0.41	0.0498834	1.3	0.330421	1.42826	131.049	338.4	5.6
M131T35	6.15152e+06	5.93017e+06	10.78	6.87387e+06	6.97976e+06	9.45	0.89	-0.16	0.0498834	1.3	0.330421	1.6279	130.966	34.9	0.6
M131T474	9.36451e+06	9.67129e+06	22.23	1.06861e+07	9.81145e+06	39.21	0.88	-0.19	0.720901	0.14	0.912378	0.498582	131.081	473.9	7.9
M131T550	1.94103e+06	2.22969e+06	47.21	3.0395e+06	3.37305e+06	48.67	0.64	-0.65	0.0379176	1.42	0.297283	0.972821	131.085	550.1	9.2
M131T65	6.33507e+06	2.63577e+06	165.9	5.3886e+06	4.81958e+06	80.59	1.18	0.23	0.278632	0.55	0.649698	0.315306	130.966	65.1	1.1
M131T72_1	795144	1.04446e+06	54.76	441297	267164	80.05	1.8	0.85	0.0498834	1.3	0.330421	1.22443	130.522	71.9	1.2
M131T72_2	1.48007e+06	1.4168e+06	14.67	1.37243e+06	1.36858e+06	20.89	1.08	0.11	0.441803	0.35	0.769616	0.748564	131.02	71.8	1.2
M131T751	5.11643e+06	5.74512e+06	59.66	3.32958e+06	2.74295e+06	46.81	1.54	0.62	0.382284	0.42	0.730096	0.830053	130.522	751.1	12.5
M131T76	6.75055e+06	6.77053e+06	8.59	8.55858e+06	8.34966e+06	24.57	0.79	-0.34	0.0829837	1.08	0.403171	1.57348	131.09	76.3	1.3
M131T800	2.31375e+07	2.1147e+07	41.37	1.76967e+07	1.77692e+07	30.29	1.31	0.39	0.328205	0.48	0.69011	1.03743	130.522	799.9	13.3
M131T86	4.55669e+07	4.1879e+07	31.94	5.90875e+07	6.29899e+07	36.74	0.77	-0.37	0.130381	0.88	0.480121	0.768603	131.053	85.6	1.4
M131T89	2.07219e+06	1.88982e+06	41.54	1.85009e+06	1.76566e+06	33.32	1.12	0.16	0.720901	0.14	0.912378	0.449694	131.034	88.6	1.5
M132T128	8.47515e+07	8.97163e+07	18.54	6.00293e+07	3.21722e+07	81.24	1.41	0.5	0.382284	0.42	0.730096	1.41875	132.077	127.6	2.1
M132T144	1.8479e+07	1.44364e+07	48.8	3.45244e+07	3.60135e+07	67.23	0.54	-0.9	0.234499	0.63	0.606344	0.624195	132.077	143.9	2.4
M132T148	1.43334e+09	1.34477e+09	28.66	1.23555e+09	1.14424e+09	25.11	1.16	0.21	0.278632	0.55	0.649698	0.887153	132.102	148.3	2.5
M132T188	1.43178e+06	1.36708e+06	25.88	1.32175e+06	1.3975e+06	38.06	1.08	0.12	1	0	1	0.546479	132.012	188.2	3.1
M132T189_1	9.36271e+09	6.15604e+09	91.25	1.51726e+10	1.31987e+10	84.46	0.62	-0.7	0.505361	0.3	0.809141	0.484744	132.102	188.6	3.1
M132T189_2	1.26907e+06	1.19675e+06	12.4	1.31294e+06	1.26303e+06	11.88	0.97	-0.05	0.382284	0.42	0.730096	0.405233	132.191	189.4	3.2
M132T202	8.78269e+06	7.40192e+06	52.03	3.37864e+06	2.01287e+06	87.42	2.6	1.38	0.014763	1.83	0.200021	1.836	132.066	201.8	3.4
M132T222	9.84479e+08	9.88167e+08	24.35	1.56982e+09	1.50951e+09	34.3	0.63	-0.67	0.0206682	1.68	0.228643	1.72087	132.102	222.2	3.7
M132T338	2.00576e+06	2.08089e+06	15.6	1.58182e+06	1.69495e+06	29.91	1.27	0.34	0.0281274	1.55	0.261699	1.33619	132.053	338.4	5.6
M132T339	1.04834e+07	1.10261e+07	18.42	8.33048e+06	8.22899e+06	30.36	1.26	0.33	0.0829837	1.08	0.403171	1.44691	132.077	338.8	5.6
M132T397	4.20109e+06	3.81358e+06	86.52	5.13211e+06	2.56536e+06	96.72	0.82	-0.29	0.720901	0.14	0.912378	0.548725	132.078	397.2	6.6
M132T76	197997	199806	49.19	200938	159794	43.02	0.99	-0.02	0.878477	0.06	0.967431	0.277627	132.091	76.1	1.3
M132T770	1.16193e+07	1.18219e+07	22.86	1.21451e+07	1.26734e+07	19.66	0.96	-0.06	0.645377	0.19	0.878848	0.284314	132.077	769.8	12.8
M132T86	2.2497e+06	2.42059e+06	70.43	6.07673e+06	5.85921e+06	45.78	0.37	-1.43	0.004662	2.33	0.129379	1.9204	132.054	85.6	1.4
M132T87	1.4289e+07	1.41845e+07	4.14	1.51775e+07	1.50044e+07	4.2	0.94	-0.09	0.0104118	1.98	0.169968	1.85484	132.065	87	1.4
M132T94_1	1.66303e+07	1.80215e+07	30.43	1.83773e+07	1.85944e+07	8.69	0.9	-0.14	0.720901	0.14	0.912378	0.754483	131.987	94.4	1.6
M132T94_2	2.40582e+10	2.45272e+10	8.49	2.53627e+10	2.53124e+10	2.1	0.95	-0.08	0.382284	0.42	0.730096	1.30718	132.077	94.4	1.6
M132T94_3	6.97287e+06	7.02553e+06	34.09	7.67045e+06	6.9624e+06	24.48	0.91	-0.14	0.720901	0.14	0.912378	0.682744	132.118	94.3	1.6
M132T94_4	1.45706e+07	1.37588e+07	16.25	1.44261e+07	1.38116e+07	12.05	1.01	0.01	0.878477	0.06	0.967431	0.042332	132.166	94.4	1.6
M132T99	498820	391643	74.45	510680	440830	49.18	0.98	-0.03	0.720901	0.14	0.912378	0.538655	132.048	99.1	1.7
M133T114	1.56498e+07	1.57743e+07	13.31	1.46874e+07	1.47002e+07	24.63	1.07	0.09	0.505361	0.3	0.809141	0.625889	133.08	114.2	1.9
M133T122	8.96302e+07	1.14832e+08	59.58	7.34775e+07	8.97093e+07	60.66	1.22	0.29	0.194872	0.71	0.56435	0.181711	133.032	121.7	2
M133T140	372202	172987	147.51	2.93864e+06	2.06051e+06	79.61	0.13	-2.98	0.0029526	2.53	0.116769	2.28789	133.032	139.8	2.3
M133T148	6.67265e+07	5.57211e+07	88.76	1.29039e+08	1.20885e+08	60.54	0.52	-0.95	0.160528	0.79	0.521677	1.14834	133.105	148.2	2.5
M133T189	2.22491e+08	2.36605e+08	54.42	2.04512e+08	1.93449e+08	68.82	1.09	0.12	0.573737	0.24	0.846615	0.256086	133.105	188.7	3.1
M133T222	7.58459e+07	3.97958e+07	71.93	1.42242e+08	1.50314e+08	59.03	0.53	-0.91	0.0498834	1.3	0.330421	1.26594	133.105	222.1	3.7
M133T280	1.52152e+06	1.52884e+06	83.84	1.95003e+06	1.57109e+06	84.27	0.78	-0.36	0.278632	0.55	0.649698	0.48807	133.049	279.6	4.7
M133T353	1.78344e+06	1.50301e+06	56.6	2.7241e+06	2.34021e+06	46.53	0.65	-0.61	0.104895	0.98	0.440144	1.18191	133.086	353.3	5.9
M133T72	3.13915e+06	3.21346e+06	12.94	2.87499e+06	2.95651e+06	10.19	1.09	0.13	0.130381	0.88	0.480121	1.15636	132.998	71.8	1.2
M133T742	1.83311e+06	1.89373e+06	26.49	919426	737861	43.75	1.99	1	0.0029526	2.53	0.116769	2.18732	133.101	742.5	12.4
M133T768	1.93393e+06	1.88058e+06	48.05	927065	838235	65.71	2.09	1.06	0.0281274	1.55	0.261699	1.623	133.101	767.6	12.8
M133T85	4.63513e+07	5.15803e+07	40.88	4.76379e+07	5.32024e+07	34.79	0.97	-0.04	0.95913	0.02	0.990641	0.0913033	133.061	84.6	1.4
M133T94	1.43495e+09	1.44508e+09	24.74	1.20482e+09	1.1757e+09	14.08	1.19	0.25	0.160528	0.79	0.521677	1.10543	133.08	94.3	1.6
M134T101	2.43439e+07	2.45131e+07	13.87	25883639	2.58336e+07	38.65	0.94	-0.09	0.95913	0.02	0.990641	0.02858	134.027	100.9	1.7
M134T108	197008	83500.3	99.09	580928	553068	48.44	0.34	-1.56	0.0206682	1.68	0.228643	1.88837	134.118	108.4	1.8
M134T122	3.31409e+06	3.33e+06	17.42	2.95183e+06	3.07042e+06	35.64	1.12	0.17	0.505361	0.3	0.809141	0.750329	134.035	121.6	2
M134T155	2.51632e+06	2.53238e+06	19.88	2.50711e+06	2.56812e+06	18.85	1	0.01	1	0	1	0.0267211	133.515	155.3	2.6
M134T189	1.71973e+07	1.64443e+07	15.58	1.03091e+07	9.97027e+06	36.93	1.67	0.74	0.0010878	2.96	0.0833774	2.12662	134.107	189.3	3.2
M134T222	1.35045e+07	1.34326e+07	20.98	8.47337e+06	6.87236e+06	40.68	1.59	0.67	0.0104118	1.98	0.169968	2.05099	134.107	222.4	3.7
M134T384	465102	386837	66.24	644085	636318	33.81	0.72	-0.47	0.130381	0.88	0.480121	1.33325	134.063	384.2	6.4
M134T76	613939	618986	30.58	413414	426977	40.9	1.49	0.57	0.0498834	1.3	0.330421	1.53774	134.101	76	1.3
M134T85	1.0599e+08	8.20364e+07	57.1	3.10764e+08	2.37583e+08	89.7	0.34	-1.55	0.505361	0.3	0.809141	1.17106	134.045	85.2	1.4
M134T94	1.06647e+08	1.03867e+08	9.24	9.78216e+07	9.74287e+07	17.23	1.09	0.12	0.130381	0.88	0.480121	1.06517	134.081	94.3	1.6
M135T454	107422	45386.3	101.53	84882.9	43967.5	114.45	1.27	0.34	0.95913	0.02	0.990641	0.233389	134.999	454	7.6
M135T485	169092	136185	72.98	157558	171319	40.8	1.07	0.1	1	0	1	0.244551	135.081	485	8.1
M135T612	153782	157800	21.97	138015	131352	44.35	1.11	0.16	0.573737	0.24	0.846615	0.695393	135.117	611.6	10.2
M135T624	5.7053e+06	5.61755e+06	31.06	4.28562e+06	4.32512e+06	29.18	1.33	0.41	0.194872	0.71	0.56435	1.25984	135.08	624.1	10.4
M135T742	7.7967e+06	5.81986e+06	71.15	6.43985e+06	6.21455e+06	49.74	1.21	0.28	0.798446	0.1	0.941385	0.320233	135.08	741.6	12.4
M135T79	885162	836962	15.78	1.08631e+06	1.06253e+06	10.04	0.81	-0.3	0.014763	1.83	0.200021	2.04372	135.003	78.7	1.3
M135T801	1.7021e+06	2.09222e+06	52.35	1.28614e+06	1.23168e+06	39.86	1.32	0.4	0.382284	0.42	0.730096	0.503188	135.081	801.4	13.4
M135T812	3.09195e+06	2.37049e+06	61.24	1.96292e+06	1.869e+06	30.85	1.58	0.66	0.0649573	1.19	0.368412	1.43117	135.08	811.7	13.5
M135T85	9.59657e+06	1.04123e+07	31.86	1.44613e+07	1.43967e+07	30.54	0.66	-0.59	0.0649573	1.19	0.368412	1.36313	135.048	85.2	1.4
M135T90	3.57544e+06	3.71184e+06	19.26	3.19477e+06	2.88112e+06	35.73	1.12	0.16	0.0829837	1.08	0.403171	0.862072	135.065	90.1	1.5
M136T100	1.02207e+07	1.02076e+07	35.83	1.41179e+07	1.35211e+07	34.52	0.72	-0.47	0.160528	0.79	0.521677	1.23236	136.062	99.6	1.7
M136T101	1.16365e+06	1.17266e+06	25.53	1.35298e+06	1.33028e+06	23.72	0.86	-0.22	0.278632	0.55	0.649698	0.92374	136.023	100.9	1.7
M136T105	2.17425e+06	1.83465e+06	48.78	1.49586e+06	1.18921e+06	67.78	1.45	0.54	0.0829837	1.08	0.403171	1.18037	136.043	104.8	1.7
M136T119	8.87518e+07	9.04097e+07	52.13	8.79322e+07	9.57039e+07	65.97	1.01	0.01	1	0	1	0.403923	136.062	119	2
M136T124	5.98445e+07	5.46798e+07	29.15	5.62381e+07	4.92588e+07	22.1	1.06	0.09	0.645377	0.19	0.878848	0.231124	136.076	124.4	2.1
M136T139	3.78762e+07	4.15639e+07	25.51	3.42579e+07	3.41854e+07	11.77	1.11	0.14	0.234499	0.63	0.606344	0.510279	136.076	139.4	2.3
M136T191	1.862e+07	1.90814e+07	12.62	1.78349e+07	1.71449e+07	17.81	1.04	0.06	0.505361	0.3	0.809141	0.570014	136.076	190.8	3.2
M136T334	2.75744e+06	2.31874e+06	69.91	2.27548e+06	1.24889e+06	89.9	1.21	0.28	0.382284	0.42	0.730096	0.708352	136.062	333.8	5.6
M136T385	3.90261e+06	2.54148e+06	100.13	7.21185e+06	7.6159e+06	63.63	0.54	-0.89	0.645377	0.19	0.878848	1.20327	136.063	385.2	6.4
M136T478	2.24615e+06	2.06802e+06	34.31	2.47661e+06	2.45262e+06	41.11	0.91	-0.14	0.878477	0.06	0.967431	0.372353	136.076	478.5	8
M136T662	3.27439e+06	3.35608e+06	39.56	2.61867e+06	2.36094e+06	32.18	1.25	0.32	0.328205	0.48	0.69011	0.662818	136.022	662.3	11
M136T771	3.51767e+06	3.25714e+06	38.83	3.815e+06	3.74163e+06	63.57	0.92	-0.12	0.645377	0.19	0.878848	0.345937	136.048	770.6	12.8
M136T92	4.54013e+06	4.3433e+06	21.01	2.64732e+06	2.61186e+06	28.54	1.71	0.78	0.0010878	2.96	0.0833774	2.26236	136.048	91.8	1.5
M137T119	1.48548e+06	1.54338e+06	31.7	5.58137e+06	5.38423e+06	71.21	0.27	-1.91	0.014763	1.83	0.200021	1.77161	137.065	118.8	2
M137T125	3.60712e+06	3.95078e+06	31.39	3.24659e+06	3.19223e+06	32.53	1.11	0.15	0.798446	0.1	0.941385	0.496778	137.079	124.7	2.1
M137T139	896478	881745	23.2	839134	761994	28.97	1.07	0.1	0.505361	0.3	0.809141	0.534416	137.079	139.1	2.3
M137T146_1	6.1044e+06	5.65873e+06	27.71	5.83606e+06	5.88476e+06	43.73	1.05	0.06	0.95913	0.02	0.990641	0.467523	136.951	145.7	2.4
M137T146_2	2.93826e+09	2.99513e+09	6.76	3.04016e+09	2.9611e+09	12.01	0.97	-0.05	0.798446	0.1	0.941385	0.466193	137.046	145.7	2.4
M137T146_3	1.20832e+06	1.17228e+06	19.31	1.07547e+06	1.06065e+06	28.17	1.12	0.17	0.278632	0.55	0.649698	0.901442	137.141	146.1	2.4
M137T191	1.16391e+06	905281	50.53	1.25997e+06	861004	67.17	0.92	-0.11	0.798446	0.1	0.941385	0.0758695	137.079	191.2	3.2
M137T193	6.68596e+06	6.87646e+06	26.94	7.4892e+06	6.98451e+06	26.64	0.89	-0.16	0.720901	0.14	0.912378	0.649193	137.06	192.8	3.2
M137T259	4.03405e+06	4.07511e+06	18	5.55119e+06	4.87864e+06	38.98	0.73	-0.46	0.130381	0.88	0.480121	1.24105	137.06	258.6	4.3
M137T280_2	2.04234e+09	1.94133e+09	33.21	2.2919e+09	2.03064e+09	35.48	0.89	-0.17	0.382284	0.42	0.730096	0.65409	137.046	280.1	4.7
M137T280_3	1.20203e+06	1.17173e+06	11.34	1.21524e+06	1.06366e+06	27.54	0.99	-0.02	0.573737	0.24	0.846615	0.143659	137.14	279.6	4.7
M137T306	4.07818e+07	4.03274e+07	16.83	4.70106e+07	4.26909e+07	39.97	0.87	-0.21	0.720901	0.14	0.912378	0.537272	137.046	306.4	5.1
M137T385	217252	216962	29.9	419729	377805	45.85	0.52	-0.95	0.004662	2.33	0.129379	2.04583	137.065	385.2	6.4
M137T517	816530	916018	42.1	1012910	948914	20.65	0.81	-0.31	0.328205	0.48	0.69011	1.05355	137.096	516.8	8.6
M137T65	2.1623e+06	1.90697e+06	39.95	2.34719e+06	2.09692e+06	29.46	0.92	-0.12	0.160528	0.79	0.521677	0.510799	137.132	64.9	1.1
M137T88	1.85544e+06	1.84368e+06	13.92	1.7731e+06	1.71721e+06	13.09	1.05	0.07	0.573737	0.24	0.846615	0.48913	137.071	88.5	1.5
M138T100	8.13972e+06	8.13715e+06	10.28	1.00326e+07	9.96547e+06	19.17	0.81	-0.3	0.014763	1.83	0.200021	1.70181	138.055	100.1	1.7
M138T121	1.85021e+07	1.799e+07	29.31	1.90926e+07	2.05152e+07	44.98	0.97	-0.05	0.645377	0.19	0.878848	0.279762	138.066	121.4	2
M138T130	1.40827e+07	1.41705e+07	12.83	1.63462e+07	1.6538e+07	13.51	0.86	-0.22	0.0649573	1.19	0.368412	1.58339	137.987	129.6	2.2
M138T180	2.26784e+08	2.16242e+08	13.93	2.0157e+08	1.91176e+08	15.83	1.13	0.17	0.104895	0.98	0.440144	1.21326	138.049	180	3
M138T34	2.78813e+07	1.77424e+07	60.11	4.13516e+07	4.60631e+07	38.16	0.67	-0.57	0.104895	0.98	0.440144	1.18237	137.986	33.7	0.6
M138T400	1.73639e+06	1.59445e+06	45.96	2.58351e+06	2.72545e+06	72.16	0.67	-0.57	0.505361	0.3	0.809141	0.408724	138.023	399.6	6.7
M138T65	2.7187e+07	2.67515e+07	16.17	5.02426e+07	5.30087e+07	42.21	0.54	-0.89	0.0104118	1.98	0.169968	1.88518	137.986	64.9	1.1
M138T66	1.25525e+07	1.30604e+07	43.09	9.19654e+06	7.86275e+06	82.2	1.36	0.45	0.798446	0.1	0.941385	0.847864	138.065	65.8	1.1
M139T100	191911	201327	41.37	180651	188951	50.83	1.06	0.09	0.720901	0.14	0.912378	0.350637	139.058	100	1.7
M139T106	439910	450550	21.36	498971	429219	39.34	0.88	-0.18	0.720901	0.14	0.912378	0.426242	139.042	105.9	1.8
M139T108	1.44103e+06	1.38092e+06	17.41	1.16784e+06	1.02797e+06	59.73	1.23	0.3	0.328205	0.48	0.69011	1.12553	139.087	107.9	1.8
M139T122	1.16894e+07	1.20849e+07	30.2	8.47113e+06	8.78624e+06	56.54	1.38	0.46	0.194872	0.71	0.56435	1.10609	139.05	121.6	2
M139T130	6.30298e+06	6.00379e+06	25.94	1.33362e+07	1.38148e+07	31.85	0.47	-1.08	0.0104118	1.98	0.169968	2.19518	138.986	129.6	2.2
M139T146	9.94983e+06	9.73513e+06	42.56	1.12207e+07	1.09283e+07	21.73	0.89	-0.17	0.573737	0.24	0.846615	0.818295	139.05	145.7	2.4
M139T180	7.06506e+06	6.91348e+06	36.06	7.14234e+06	6.34586e+06	61.1	0.99	-0.02	0.878477	0.06	0.967431	0.43147	139.051	180.3	3
M139T280	5.56315e+06	1.83104e+06	133.74	3.24603e+06	2.98011e+06	85.05	1.71	0.78	0.95913	0.02	0.990641	0.0844294	139.05	280.1	4.7
M139T371	768137	244992	139.78	790251	244855	146.26	0.97	-0.04	0.95913	0.02	0.990641	0.156793	139.087	371	6.2
M139T65	2.95056e+06	2.97897e+06	23.02	3.09069e+06	3.60961e+06	46.33	0.95	-0.07	0.573737	0.24	0.846615	0.127285	139.112	64.8	1.1
M139T710	2.80717e+06	2.27636e+06	54.4	2.27903e+06	2.39683e+06	18.4	1.23	0.3	1	0	1	0.514826	139.112	710.4	11.8
M139T74	2.87064e+06	2.687e+06	45.51	2.42364e+06	2.43322e+06	42.3	1.18	0.24	0.720901	0.14	0.912378	0.49953	139.098	73.5	1.2
M140T111	1.20177e+07	1.14278e+07	14.43	1.42352e+07	1.4412e+07	18.84	0.84	-0.24	0.0829837	1.08	0.403171	1.36063	140.082	111.1	1.9
M140T114_1	563944	250202	129.94	933927	203799	125.66	0.6	-0.73	0.878477	0.06	0.967431	0.213032	140.005	114.3	1.9
M140T114_2	737588	733384	21.54	1.49357e+06	1.47061e+06	38.83	0.49	-1.02	0.0104118	1.98	0.169968	2.06166	140.071	113.6	1.9
M140T130	2.07861e+07	1.38108e+07	65.16	3.84777e+07	3.89361e+07	51.69	0.54	-0.89	0.130381	0.88	0.480121	1.48921	139.982	130	2.2
M140T160	4.92837e+07	4.79392e+07	19.02	4.661e+07	5.02192e+07	29.83	1.06	0.08	0.878477	0.06	0.967431	0.52359	139.981	160	2.7
M140T194	1.3555e+08	1.2975e+08	30.35	1.49559e+08	1.45858e+08	32.49	0.91	-0.14	0.505361	0.3	0.809141	0.434168	139.98	194.5	3.2
M140T233	1.77068e+08	1.74515e+08	17.3	1.88954e+08	1.93759e+08	13.31	0.94	-0.09	0.382284	0.42	0.730096	0.767072	139.984	232.5	3.9
M140T250	1.10963e+08	1.07447e+08	32.16	1.21972e+08	1.17343e+08	18.36	0.91	-0.14	0.382284	0.42	0.730096	0.700785	139.98	250	4.2
M140T267	5.58443e+08	5.3046e+08	41.4	2.61495e+08	2.28561e+08	81.12	2.14	1.09	0.0206682	1.68	0.228643	1.77662	139.981	266.5	4.4
M140T287	2.82551e+09	3.55177e+09	54.68	2.74403e+09	3.52713e+09	56.28	1.03	0.04	0.573737	0.24	0.846615	0.158601	139.981	287.4	4.8
M140T299	5.46761e+07	3.74553e+07	74.19	7.00409e+07	4.98216e+07	83.06	0.78	-0.36	0.573737	0.24	0.846615	0.380585	139.984	299.4	5
M140T348	2.68244e+07	2.80925e+07	39.03	24668564	2.69298e+07	47.58	1.09	0.12	0.645377	0.19	0.878848	0.217737	139.984	348	5.8
M140T364	4.1827e+06	3.41763e+06	47.83	5.43984e+06	5.19363e+06	44.5	0.77	-0.38	0.234499	0.63	0.606344	1.03098	140.07	364.3	6.1
M140T387	1.31619e+06	1.37951e+06	37.81	1.25917e+06	1.22848e+06	28.8	1.05	0.06	0.720901	0.14	0.912378	0.107371	140.143	386.7	6.4
M140T405	1.12749e+07	9.15085e+06	45.51	1.45909e+07	8.83791e+06	91.52	0.77	-0.37	0.878477	0.06	0.967431	0.336247	139.984	404.6	6.7
M140T472	3.56906e+07	3.52053e+07	22.76	2.85476e+07	2.74612e+07	18.18	1.25	0.32	0.0649573	1.19	0.368412	1.47203	139.981	472.3	7.9
M140T493	7.67591e+06	6.55664e+06	53.82	8.40261e+06	7.75785e+06	38.09	0.91	-0.13	0.573737	0.24	0.846615	0.477134	139.984	493.4	8.2
M140T506	1.04458e+07	1.20218e+07	34.42	1.3567e+07	1.11998e+07	36.41	0.77	-0.38	0.573737	0.24	0.846615	1.11948	139.98	506.3	8.4
M140T540	1.71163e+07	1.69439e+07	41.29	16459984	1.4383e+07	48.34	1.04	0.06	0.798446	0.1	0.941385	0.103066	139.98	539.7	9
M140T557	7.57384e+06	6.28964e+06	35.75	9.10725e+06	8.81308e+06	38.33	0.83	-0.27	0.234499	0.63	0.606344	0.677172	139.98	557.2	9.3
M140T575	1.03034e+07	9.99273e+06	23.48	1.24402e+07	1.13553e+07	22.37	0.83	-0.27	0.0829837	1.08	0.403171	1.19578	139.981	575.5	9.6
M140T593	4.0359e+06	2.83852e+06	68.55	1.65486e+06	1.19955e+06	84.04	2.44	1.29	0.0379176	1.42	0.297283	1.63137	139.98	593.4	9.9
M140T609	5.19848e+06	5.48025e+06	32.13	4.64785e+06	4.68133e+06	50.15	1.12	0.16	0.573737	0.24	0.846615	0.659426	139.98	608.7	10.1
M140T619	2.69673e+06	2.71096e+06	24.1	1.61636e+06	1.53941e+06	38.48	1.67	0.74	0.00699301	2.16	0.14968	1.93583	139.98	619.4	10.3
M140T69	8.16397e+06	7922642	14.95	8.38498e+06	8.2384e+06	18.2	0.97	-0.04	0.798446	0.1	0.941385	0.219471	139.963	68.9	1.1
M140T72_1	1.96487e+06	1.98805e+06	5.25	1.50259e+06	1.5753e+06	25.69	1.31	0.39	0.0003108	3.51	0.0568482	1.62145	139.527	71.8	1.2
M140T74	52382.3	51352.6	10.76	352041	339796	91.77	0.15	-2.75	0.278632	0.55	0.649698	1.64366	140.143	74.4	1.2
M140T752	1.10912e+06	1.30447e+06	56.97	1.25663e+06	1.51893e+06	57.99	0.88	-0.18	0.382284	0.42	0.730096	0.210826	140.068	752.1	12.5
M140T77	1.6283e+06	1.6668e+06	8.15	1.27509e+06	1.2469e+06	11.17	1.28	0.35	0.0010878	2.96	0.0833774	2.45349	140.068	76.8	1.3
M140T770	6.94304e+06	5.61888e+06	51.93	1.13943e+07	1.2017e+07	58.2	0.61	-0.71	0.194872	0.71	0.56435	1.0829	140.068	770.3	12.8
M140T778	5.77711e+06	5.92994e+06	22.35	5.51541e+06	5.70308e+06	40.85	1.05	0.07	0.95913	0.02	0.990641	0.496181	140.068	778.3	13
M140T806	8.59609e+07	8.71865e+07	37.51	7.3136e+07	6.28323e+07	36.78	1.18	0.23	0.441803	0.35	0.769616	0.551719	139.988	805.7	13.4
M141T103	7.75182e+07	7.84879e+07	18.45	7.90542e+07	7.7769e+07	16.01	0.98	-0.03	0.95913	0.02	0.990641	0.215949	141.066	103.4	1.7
M141T104	1.98152e+06	1.94749e+06	32.33	1.17661e+06	1.16244e+06	34.46	1.68	0.75	0.0104118	1.98	0.169968	1.9338	140.995	103.6	1.7
M141T111	327924	268362	55.21	298745	327354	37.83	1.1	0.13	0.878477	0.06	0.967431	0.0591909	141.085	111.2	1.9
M141T130	9.40796e+06	9.24837e+06	10.42	8.57043e+06	8.16762e+06	16.88	1.1	0.13	0.194872	0.71	0.56435	1.10914	140.981	129.5	2.2
M141T34	1.35184e+07	1.32078e+07	13	1.38345e+07	1.43237e+07	11.86	0.98	-0.03	0.505361	0.3	0.809141	0.307175	140.984	34.2	0.6
M141T364	193674	28888.8	132.95	157605	124480	95.67	1.23	0.3	0.798446	0.1	0.941385	0.23201	141.074	364.4	6.1
M141T398	2.63351e+06	2.59567e+06	24.45	2.31498e+06	2.01811e+06	42.47	1.14	0.19	0.505361	0.3	0.809141	0.758368	141.139	398.2	6.6
M141T400	2.91869e+06	2.88132e+06	18.89	2.39667e+06	2.12154e+06	34.13	1.22	0.28	0.278632	0.55	0.649698	1.16797	141.01	399.5	6.7
M141T64	1.70013e+07	1.71659e+07	4.16	1.75601e+07	1.741e+07	3.42	0.97	-0.05	0.160528	0.79	0.521677	1.23878	140.984	63.6	1.1
M141T679	617017	602392	39.9	499675	491349	67.3	1.23	0.3	0.441803	0.35	0.769616	0.927047	141.066	679.1	11.3
M141T72_2	1.358e+07	1.27681e+07	13.3	1.3261e+07	1.24256e+07	24.52	1.02	0.03	0.382284	0.42	0.730096	0.288403	141.051	71.8	1.2
M141T728	936403	607008	57.6	937840	841504	35.22	1	0	0.573737	0.24	0.846615	0.399746	141.091	727.9	12.1
M141T770	1.86364e+06	1.78251e+06	19.31	1.86908e+06	1.91956e+06	21.65	1	0	0.720901	0.14	0.912378	0.0468069	141.091	769.7	12.8
M141T807	4.98537e+06	5.16415e+06	29.09	3.85333e+06	3.56378e+06	40.23	1.29	0.37	0.104895	0.98	0.440144	1.2003	140.994	807.3	13.5
M142T103_1	3.42072e+06	2.60364e+06	69.74	3.58191e+06	3.52823e+06	47.44	0.95	-0.07	0.645377	0.19	0.878848	0.485965	142.069	103.4	1.7
M142T129	5.16604e+06	4.30021e+06	38.99	1.07637e+07	1.00203e+07	46.78	0.48	-1.06	0.004662	2.33	0.129379	2.01608	141.979	129.4	2.2
M142T135	3.33975e+07	3.28631e+07	33.32	3.415e+07	3.1151e+07	54.03	0.98	-0.03	0.720901	0.14	0.912378	0.248326	141.958	135.1	2.3
M142T275	1.11408e+07	1.13761e+07	11.66	9944339	9.55932e+06	19.03	1.12	0.16	0.104895	0.98	0.440144	1.17327	141.957	275.2	4.6
M142T287	6.92308e+06	224215	181.26	5.2266e+06	260045	183.28	1.32	0.41	0.798446	0.1	0.941385	0.0362244	141.959	287.4	4.8
M142T310	473887	1786.7	191.02	481855	1726.37	178.35	0.98	-0.02	0.798446	0.1	0.941385	0.263303	142.123	310.1	5.2
M142T34	2.64215e+07	2.54544e+07	16.17	2.84032e+07	2.6153e+07	14.98	0.93	-0.1	0.278632	0.55	0.649698	0.752854	141.978	34.2	0.6
M142T35	4.44555e+07	41527824	27.87	8.13774e+07	7.87321e+07	50.35	0.55	-0.87	0.0649573	1.19	0.368412	1.4994	141.958	35.2	0.6
M142T356	1.56332e+06	1.1756e+06	56.39	1.29605e+06	948745	84.22	1.21	0.27	0.328205	0.48	0.69011	0.839806	142.061	356.2	5.9
M142T485	246537	189896	68.1	365788	393247	53.29	0.67	-0.57	0.382284	0.42	0.730096	0.982267	142.123	485	8.1
M142T625	522608	493478	31.16	365535	351585	36.61	1.43	0.52	0.0829837	1.08	0.403171	1.46981	142.123	625	10.4
M142T63	7.96731e+07	7.24362e+07	59.9	6.38486e+07	6.21114e+07	42.71	1.25	0.32	0.645377	0.19	0.878848	0.388588	141.978	63.3	1.1
M142T709	191797	155723	83.27	192228	148635	87.31	1	0	1	0	1	0.0213741	142.159	709.3	11.8
M142T72_1	9.838e+06	9.84986e+06	5.76	1.09951e+07	1.01646e+07	18.69	0.89	-0.16	0.278632	0.55	0.649698	1.09885	142.035	71.8	1.2
M142T72_2	1.18567e+06	1.15988e+06	11.28	1.16105e+06	1.16308e+06	7.3	1.02	0.03	0.878477	0.06	0.967431	0.325449	142.052	71.5	1.2
M142T807	4.59078e+07	4.41278e+07	31.62	4.51968e+07	3.76597e+07	45.78	1.02	0.02	0.95913	0.02	0.990641	0.157379	141.983	806.7	13.4
M142T808	4.62745e+07	4.96079e+07	33.84	4.39358e+07	4.19397e+07	37.55	1.05	0.07	0.798446	0.1	0.941385	0.239777	141.957	808	13.5
M142T828	5.5531e+06	5.41435e+06	17.49	3.81793e+06	3.84402e+06	17.14	1.45	0.54	0.0010878	2.96	0.0833774	2.16659	142.21	828.3	13.8
M142T85	1.16616e+07	1.22868e+07	54.92	1.25931e+07	1.42642e+07	44.43	0.93	-0.11	1	0	1	0.201468	142.026	84.5	1.4
M143T109	421781	286109	89.76	616060	794842	63.74	0.68	-0.55	0.278632	0.55	0.649698	0.839835	143.082	109.2	1.8
M143T137	4.36143e+06	4.20578e+06	14.74	6.20589e+06	6.35914e+06	43.81	0.7	-0.51	0.382284	0.42	0.730096	1.04849	142.982	136.9	2.3
M143T203	2.57656e+06	2.4933e+06	9.74	2.41982e+06	2.41212e+06	11.4	1.06	0.09	0.382284	0.42	0.730096	0.998171	142.982	203	3.4
M143T519	269737	234104	31.8	305159	297557	27.29	0.88	-0.18	0.328205	0.48	0.69011	0.679528	143.118	519.3	8.7
M143T542	1.71216e+06	1.81561e+06	43.6	3.17101e+06	2.65111e+06	37.55	0.54	-0.89	0.004662	2.33	0.129379	1.94509	143.107	542.1	9
M143T652	474897	414018	51.68	432676	385772	35.11	1.1	0.13	0.95913	0.02	0.990641	0.135277	143.07	652.2	10.9
M143T68	2.12527e+06	2.26691e+06	38.51	1.80484e+06	1.59316e+06	75.05	1.18	0.24	0.878477	0.06	0.967431	0.831995	142.96	68.2	1.1
M143T72	1.78891e+06	1.31323e+06	54.38	3.03113e+06	1.51274e+06	84.36	0.59	-0.76	0.878477	0.06	0.967431	0.74761	143.048	71.8	1.2
M143T82	1.82721e+07	1.62854e+07	32.4	1.31458e+07	1.23129e+07	35.62	1.39	0.48	0.0829837	1.08	0.403171	1.43518	142.948	82.1	1.4
M143T99	2.60623e+06	2.8628e+06	28.9	2.33558e+06	2.70415e+06	52.18	1.12	0.16	1	0	1	0.535135	143.081	99.4	1.7
M144T101	4.21453e+07	4.18299e+07	5.28	4.5898e+07	4.53936e+07	6.96	0.92	-0.12	0.014763	1.83	0.200021	1.73528	144.102	100.6	1.7
M144T315_1	881738	1.01574e+06	37.97	1.09267e+06	1.08347e+06	19.33	0.81	-0.31	0.194872	0.71	0.56435	1.18358	143.946	314.8	5.2
M144T315_2	2.12591e+09	2.061e+09	34.88	1819894730	1.8236e+09	22.2	1.17	0.22	0.573737	0.24	0.846615	0.660158	144.048	314.8	5.2
M144T315_3	1.40999e+07	1.37874e+07	25.38	1.29294e+07	1.21642e+07	28.64	1.09	0.13	0.441803	0.35	0.769616	0.592445	144.15	314.7	5.2
M144T397	3.67874e+06	3.65913e+06	79.35	5.67535e+06	5.90891e+06	48.89	0.65	-0.63	0.234499	0.63	0.606344	1.10065	144.081	397.1	6.6
M144T428	6.32887e+06	6.93754e+06	60.59	3.02982e+06	1.63456e+06	105.03	2.09	1.06	0.0829837	1.08	0.403171	1.26398	144.081	427.8	7.1
M144T464	147542	129769	76.22	347527	328514	72.88	0.42	-1.24	0.130381	0.88	0.480121	0.233461	144.175	464.3	7.7
M144T570	21708.9	2178.27	171.34	27360.1	1132.11	179.12	0.79	-0.33	0.573737	0.24	0.846615	0.221406	143.552	569.7	9.5
M144T597	262811	203490	59.65	268666	134715	83.34	0.98	-0.03	0.573737	0.24	0.846615	0.255577	144.175	597.3	10
M144T663	2.01333e+06	1.44416e+06	77.24	2.36363e+06	2.13961e+06	60.32	0.85	-0.23	0.798446	0.1	0.941385	0.499561	144.138	663.2	11.1
M144T689	3661926	4.13487e+06	27.13	4.3247e+06	4.87564e+06	38.21	0.85	-0.24	0.194872	0.71	0.56435	0.477404	144.138	688.5	11.5
M144T72_1	4.15042e+07	3.32656e+07	52.53	2.80251e+07	2.16115e+07	44.69	1.48	0.57	0.382284	0.42	0.730096	1.02767	143.997	72.2	1.2
M144T98	6.17137e+06	5.89733e+06	12.76	6.61953e+06	6.57183e+06	12.95	0.93	-0.1	0.130381	0.88	0.480121	0.842243	144.065	98.1	1.6
M145T109	1.21396e+06	576938	86.55	1.80601e+06	1.75655e+06	73.2	0.67	-0.57	0.194872	0.71	0.56435	0.697515	144.961	109.3	1.8
M145T121	1.63754e+07	1.6532e+07	13.46	1.57223e+07	1.57711e+07	13.78	1.04	0.06	0.645377	0.19	0.878848	0.528619	145.05	121.2	2
M145T315	2.16667e+09	6.10148e+08	169.02	2.96741e+09	2.31014e+09	77.14	0.73	-0.45	0.0829837	1.08	0.403171	1.26498	145.051	314.7	5.2
M145T34	2.10583e+07	2.10819e+07	9.23	2.15343e+07	2.06847e+07	17.94	0.98	-0.03	0.798446	0.1	0.941385	0.13233	145.049	33.6	0.6
M145T552	978941	919829	11.71	1.07262e+06	973470	40.7	0.91	-0.13	0.95913	0.02	0.990641	0.12572	145.123	552	9.2
M145T64	8.78455e+06	9.32828e+06	41.42	1.24026e+07	1.03906e+07	59.84	0.71	-0.5	0.505361	0.3	0.809141	0.770626	145.049	64.2	1.1
M145T682	151193	133196	67.81	397775	427462	39.65	0.38	-1.4	0.0104118	1.98	0.169968	1.72526	145.123	681.7	11.4
M145T688	258647	283588	27.85	227682	202400	43.1	1.14	0.18	0.382284	0.42	0.730096	0.605664	145.142	688.4	11.5
M145T76	699439	661831	41.77	1.01138e+06	1.01361e+06	35.01	0.69	-0.53	0.130381	0.88	0.480121	1.31049	145.097	75.8	1.3
M145T815	2.39963e+07	2.63543e+07	39.65	2.2716e+07	1.86866e+07	56.15	1.06	0.08	0.441803	0.35	0.769616	0.266448	144.982	815.3	13.6
M145T89	1.87162e+07	1.91745e+07	27.87	1.58425e+07	1.50387e+07	47.03	1.18	0.24	0.441803	0.35	0.769616	0.879137	145.05	89.1	1.5
M145T99	1.7246e+07	1.62679e+07	20.39	1.75841e+07	1.87575e+07	20.02	0.98	-0.03	0.720901	0.14	0.912378	0.148231	145.049	99.5	1.7
M146T104	1.55344e+08	1.7488e+08	36.51	1.54399e+08	1.52869e+08	16.98	1.01	0.01	0.382284	0.42	0.730096	0.387642	146.081	104.3	1.7
M146T114	2.25674e+06	2.27802e+06	5.67	1.68344e+06	1.70987e+06	37.96	1.34	0.42	0.0649573	1.19	0.368412	1.43068	146.045	113.8	1.9
M146T115	1.33895e+07	1.20466e+07	29.25	1.11595e+07	9.17851e+06	33.99	1.2	0.26	0.130381	0.88	0.480121	1.05959	146.118	115.2	1.9
M146T314	436119	305046	98.03	878559	881510	43.3	0.5	-1.01	0.0829837	1.08	0.403171	1.61084	146.055	314.2	5.2
M146T315	7.28811e+07	9.31142e+07	54.24	5.59044e+07	6.26924e+07	60.48	1.3	0.38	0.160528	0.79	0.521677	0.438334	146.044	314.7	5.2
M146T383	1.76727e+06	1.75245e+06	39.63	625323	434159	83.93	2.83	1.5	0.004662	2.33	0.129379	2.04125	146.118	382.5	6.4
M146T395	189818	166841	38.3	287057	260037	51.45	0.66	-0.6	0.160528	0.79	0.521677	1.24839	146.118	395	6.6
M146T397	1.15065e+07	1.28201e+07	58.3	1.31579e+07	1.44495e+07	55.24	0.87	-0.19	0.645377	0.19	0.878848	0.325708	146.06	397.2	6.6
M146T408	1.66487e+06	1.07045e+06	72.14	1.68681e+06	1.29506e+06	89.08	0.99	-0.02	0.645377	0.19	0.878848	0.240036	146.06	407.9	6.8
M146T578	2.33553e+06	2362072	12.24	2.51514e+06	2.59697e+06	15.55	0.93	-0.11	0.194872	0.71	0.56435	0.74978	146.06	578.5	9.6
M146T66	282524	272446	13.04	343008	354094	14.74	0.82	-0.28	0.0281274	1.55	0.261699	1.69692	145.607	66.5	1.1
M146T68	3.72285e+06	3.02072e+06	53.54	4.13488e+06	3.88116e+06	52.61	0.9	-0.15	0.720901	0.14	0.912378	0.255887	146.165	68	1.1
M146T72	1.62062e+07	1.63754e+07	3.92	1.53192e+07	1.52397e+07	6.07	1.06	0.08	0.0649573	1.19	0.368412	1.4725	146.03	71.7	1.2
M146T97	2.38332e+08	2.69039e+08	38.81	2.15325e+08	2.53138e+08	46.28	1.11	0.15	0.798446	0.1	0.941385	0.407019	146.118	96.8	1.6
M147T113	4.77348e+07	4.81462e+07	5.03	5.36997e+07	5.31914e+07	14.25	0.89	-0.17	0.0829837	1.08	0.403171	1.4116	147.077	113.2	1.9
M147T126	7.05607e+06	3.07103e+06	86.18	4.916e+06	2.97617e+06	99.84	1.44	0.52	0.505361	0.3	0.809141	0.625364	147.078	126.5	2.1
M147T139	1.17801e+07	1.20498e+07	30.03	1.0833e+07	1.11474e+07	17.07	1.09	0.12	0.720901	0.14	0.912378	0.392232	147.044	139.5	2.3
M147T191	5.34184e+06	5.30978e+06	19.05	6.76838e+06	6.65059e+06	14.87	0.79	-0.34	0.0104118	1.98	0.169968	1.87723	147.044	191	3.2
M147T222	3.77458e+06	3.73127e+06	16.38	3.57041e+06	3.45922e+06	13.45	1.06	0.08	0.573737	0.24	0.846615	0.539107	147.046	221.7	3.7
M147T397	1.56014e+06	1.45819e+06	74.02	1.30785e+06	1.09331e+06	77.93	1.19	0.25	0.798446	0.1	0.941385	0.306285	147.063	396.7	6.6
M147T454	217512	216312	77.06	171560	157152	38.69	1.27	0.34	0.505361	0.3	0.809141	0.552317	146.507	454	7.6
M147T578	751820	536078	74.87	632682	610015	25.02	1.19	0.25	0.798446	0.1	0.941385	0.0251251	147.063	578.2	9.6
M147T626	1.86736e+06	1.76111e+06	46.9	1.62377e+06	1.57584e+06	14.09	1.15	0.2	0.645377	0.19	0.878848	0.308912	147.063	625.7	10.4
M147T640	917701	969374	12.67	1.07563e+06	967541	35.06	0.85	-0.23	0.573737	0.24	0.846615	0.710936	147.08	640	10.7
M147T68	332601	361955	30.67	273024	293864	54.08	1.22	0.28	0.720901	0.14	0.912378	0.774909	147.169	67.8	1.1
M147T72	1.63636e+06	1.57857e+06	72.06	1.6844e+06	516922	108.45	0.97	-0.04	0.95913	0.02	0.990641	0.390532	147.031	71.8	1.2
M147T76_1	210255	199367	20.15	266029	271874	11.13	0.79	-0.34	0.014763	1.83	0.200021	2.02688	147.008	76	1.3
M147T76_2	9.8169e+08	9.65384e+08	14.43	6.50687e+08	6.32606e+08	25.83	1.51	0.59	0.0010878	2.96	0.0833774	2.22156	147.113	76.3	1.3
M147T771	955143	897422	28.75	750991	728267	44.82	1.27	0.35	0.278632	0.55	0.649698	1.21597	147.08	770.7	12.8
M147T85	1.9384e+09	1.93613e+09	6.49	2.00677e+09	1.94584e+09	7.02	0.97	-0.05	0.328205	0.48	0.69011	0.821808	147.077	85.3	1.4
M147T97	1.34884e+07	1.3404e+07	8.04	1.53075e+07	1.5379e+07	7.33	0.88	-0.18	0.0104118	1.98	0.169968	1.97082	147.121	96.9	1.6
M148T100	3.86461e+07	4.14369e+07	23.7	3.72881e+07	3.79742e+07	29.75	1.04	0.05	0.798446	0.1	0.941385	0.318534	148.06	99.7	1.7
M148T114	2.86395e+06	2.97125e+06	28.82	3.51122e+06	2.78952e+06	53.61	0.82	-0.29	0.878477	0.06	0.967431	0.513555	148.043	113.8	1.9
M148T116	2.23205e+07	1.15015e+07	89.85	1.39952e+07	1.1941e+07	27.08	1.59	0.67	0.645377	0.19	0.878848	0.47772	148.06	116.3	1.9
M148T121	5.22165e+06	5.12982e+06	8.99	5.29881e+06	5.32633e+06	9.92	0.99	-0.02	0.645377	0.19	0.878848	0.225026	148.097	121.1	2
M148T125	420231	447446	21.18	409674	406016	16.3	1.03	0.04	0.95913	0.02	0.990641	0.108334	148.047	125.1	2.1
M148T338	2.05408e+06	2.02315e+06	7.22	1.90462e+06	1.93451e+06	6.67	1.08	0.11	0.104895	0.98	0.440144	1.49632	148.076	338.4	5.6
M148T72	2.30947e+06	2.21218e+06	13.61	2.76402e+06	2.73001e+06	5.03	0.84	-0.26	0.0206682	1.68	0.228643	2.17856	148.027	71.8	1.2
M148T76	3.17975e+07	3.29466e+07	33.27	2.46824e+07	2.48132e+07	20.79	1.29	0.37	0.194872	0.71	0.56435	1.06589	148.116	76.3	1.3
M148T77	1.23348e+06	1.29263e+06	17.44	1.14074e+06	1.10575e+06	12.98	1.08	0.11	0.160528	0.79	0.521677	0.613057	148.084	77.1	1.3
M148T84	1.32297e+08	1.4054e+08	31.99	1.3186e+08	1.33673e+08	31.67	1	0	0.95913	0.02	0.990641	0.0718137	148.004	84.2	1.4
M148T85	2.15198e+08	2.14943e+08	8.27	1.10491e+08	9.38416e+07	104.09	1.95	0.96	0.160528	0.79	0.521677	1.68305	148.08	85.3	1.4
M148T88	1.47375e+09	1.37473e+09	34.2	1.44875e+09	1.31556e+09	27.63	1.02	0.02	0.95913	0.02	0.990641	0.00244725	148.06	88.5	1.5
M148T99_1	3.83495e+06	3.86135e+06	24.23	1.9286e+06	2.12583e+06	57.34	1.99	0.99	0.00699301	2.16	0.14968	1.93107	148.097	99.4	1.7
M148T99_2	3.59082e+06	3.8098e+06	37.59	3.4499e+06	3.46831e+06	26.3	1.04	0.06	0.441803	0.35	0.769616	0.0732396	148.133	98.9	1.6
M149T335	1.72591e+06	857223	112.84	1.80996e+06	1.64901e+06	70.7	0.95	-0.07	0.505361	0.3	0.809141	0.756391	149.071	334.6	5.6
M149T338	2.47771e+07	2.20243e+07	59.04	2.31448e+07	2.08994e+07	56.7	1.07	0.1	0.720901	0.14	0.912378	0.0905084	149.06	338.4	5.6
M149T356	2.34801e+06	2.41242e+06	74.03	1.07469e+06	490026	130.61	2.18	1.13	0.0829837	1.08	0.403171	1.30765	149.03	356.4	5.9
M149T565	1.07481e+06	754579	90.94	2.06225e+06	1.61739e+06	72.08	0.52	-0.94	0.0379176	1.42	0.297283	1.37379	149.045	565.4	9.4
M149T65	5.94522e+06	6.45837e+06	62.85	2.86901e+06	2.93473e+06	62.97	2.07	1.05	0.104895	0.98	0.440144	1.25859	148.977	64.5	1.1
M149T657	910621	951473	38.7	744665	841422	36.76	1.22	0.29	0.382284	0.42	0.730096	0.620789	149.06	657.1	11
M149T76	2.46589e+06	2.46944e+06	6.54	2.72721e+06	2.60102e+06	19.2	0.9	-0.15	0.328205	0.48	0.69011	0.890803	149.117	76.1	1.3
M149T785	2.29614e+06	2.13712e+06	76.62	2.15809e+06	2.04977e+06	53.92	1.06	0.09	0.95913	0.02	0.990641	0.304694	149.023	784.8	13.1
M149T823	4.51415e+06	4.83764e+06	32.9	5.28634e+06	4.04771e+06	56.87	0.85	-0.23	0.95913	0.02	0.990641	0.270673	149.06	823.1	13.7
M149T85	7.12471e+06	7.73305e+06	70.16	6.65199e+06	7.79188e+06	64.18	1.07	0.1	0.878477	0.06	0.967431	0.10254	149.081	85.3	1.4
M149T88	6.35512e+07	6.27868e+07	10.31	5.87137e+07	6.12747e+07	30.83	1.08	0.11	0.720901	0.14	0.912378	0.784699	149.064	88.5	1.5
M150T107	299473	296322	5.43	566001	490412	50.52	0.53	-0.92	0.0281274	1.55	0.261699	1.72433	149.664	107.3	1.8
M150T122	1.26977e+09	1.29006e+09	16.05	5.69067e+08	5.78186e+08	54.47	2.23	1.16	0.0010878	2.96	0.0833774	2.11907	150.058	121.7	2
M150T140	4.62863e+07	5.39417e+07	43.35	2.76802e+07	2.40921e+07	87.29	1.67	0.74	0.160528	0.79	0.521677	1.18307	150.058	139.9	2.3
M150T288	786226	814122	47.98	1.57552e+06	1.4247e+06	55.38	0.5	-1	0.0379176	1.42	0.297283	1.27695	150.055	288	4.8
M150T308	1.27497e+06	1.45606e+06	46.27	1.35497e+06	1.46729e+06	37.71	0.94	-0.09	0.878477	0.06	0.967431	0.262623	150.055	308.1	5.1
M150T338	3.59705e+06	2.8403e+06	70.18	4.54334e+06	3.90252e+06	59.18	0.79	-0.34	0.505361	0.3	0.809141	0.604288	150.063	338.4	5.6
M150T34	1.62885e+07	1.67927e+07	43.43	1.61838e+07	1.62836e+07	24.88	1.01	0.01	0.95913	0.02	0.990641	0.179835	149.966	34.2	0.6
M150T356	8.87157e+06	9.36223e+06	12.07	1.05905e+07	10895142	15.68	0.84	-0.26	0.0281274	1.55	0.261699	1.56137	150.049	356.4	5.9
M150T404	5.72677e+06	5.19064e+06	65.54	6.3441e+06	7.44927e+06	45.53	0.9	-0.15	0.505361	0.3	0.809141	0.502005	149.967	403.6	6.7
M150T418	2.00963e+06	2.31579e+06	37.06	1.52768e+06	1.41978e+06	48.76	1.32	0.4	0.278632	0.55	0.649698	0.992713	150.057	417.8	7
M150T490	917447	992382	44.71	1.16573e+06	1.1146e+06	41.15	0.79	-0.35	0.441803	0.35	0.769616	0.842018	150.128	490.2	8.2
M150T556	670688	620714	45.68	687814	729421	29.42	0.98	-0.04	0.645377	0.19	0.878848	0.229687	150.091	556.2	9.3
M150T601	925231	835719	18.49	556108	617529	61.98	1.66	0.73	0.0281274	1.55	0.261699	1.58456	150.128	600.6	10
M150T686	360918	328145	25.12	594650	503166	39.78	0.61	-0.72	0.0379176	1.42	0.297283	1.75419	150.092	686.4	11.4
M150T72_1	9.25365e+06	8.74635e+06	42.08	8.07882e+06	7.69016e+06	28.03	1.15	0.2	0.441803	0.35	0.769616	0.083785	149.597	72.4	1.2
M150T73	3.93543e+06	3.75044e+06	99.96	9.4423e+06	6.3584e+06	79.95	0.42	-1.26	0.0829837	1.08	0.403171	1.5535	149.953	72.9	1.2
M150T738	270940	243324	63.18	247400	171955	75.66	1.1	0.13	0.720901	0.14	0.912378	0.317063	150.091	738.5	12.3
M150T84_1	4.86568e+06	4.10303e+06	41.18	6.95043e+06	5.78258e+06	39.45	0.7	-0.51	0.0498834	1.3	0.330421	1.3946	150	83.8	1.4
M150T84_2	5.70939e+06	5.70498e+06	2.67	6.27622e+06	6.25666e+06	6.78	0.91	-0.14	0.0018648	2.73	0.096514	2.13668	150.076	83.6	1.4
M150T88	1.00661e+07	1.05593e+07	30.3	8.72885e+06	8.54362e+06	23.84	1.15	0.21	0.441803	0.35	0.769616	0.697597	150.065	88.5	1.5
M151T122	2.82079e+07	2.67073e+07	32.08	4.42811e+07	4.3854e+07	46.86	0.64	-0.65	0.194872	0.71	0.56435	1.22153	151.061	121.7	2
M151T140	1.63512e+07	1.5662e+07	20.19	1.10309e+07	1.07997e+07	48.75	1.48	0.57	0.0829837	1.08	0.403171	1.62512	151.061	140	2.3
M151T266	6.21916e+06	6.61759e+06	20.18	5.28511e+06	5.44852e+06	35.67	1.18	0.23	0.573737	0.24	0.846615	0.9603	151.097	266	4.4
M151T302	5.94808e+06	5.11793e+06	49.1	4.49413e+06	4.66794e+06	46.9	1.32	0.4	0.573737	0.24	0.846615	0.93694	151.097	302.3	5
M151T330	5.13103e+06	4.44842e+06	45.08	5.38414e+06	4.24158e+06	57.51	0.95	-0.07	0.798446	0.1	0.941385	0.0223237	151.062	329.7	5.5
M151T353	1.13808e+06	1.10359e+06	13.22	1.1252e+06	1.09147e+06	17.1	1.01	0.02	0.95913	0.02	0.990641	0.208005	151.097	352.6	5.9
M151T356	814389	845880	97.49	1.16178e+06	409521	123.95	0.7	-0.51	1	0	1	0.420448	150.551	356.4	5.9
M151T394	923085	918175	42.74	1.00968e+06	1.04578e+06	40.08	0.91	-0.13	0.573737	0.24	0.846615	0.277408	151.097	393.7	6.6
M151T596	538667	526721	36.71	421618	428222	29.13	1.28	0.35	0.194872	0.71	0.56435	1.06743	151.097	596.2	9.9
M151T672	2.93786e+06	3.0427e+06	31.27	2.75586e+06	2.66546e+06	23.13	1.07	0.09	0.645377	0.19	0.878848	0.215693	151.036	671.8	11.2
M151T72_1	1.25472e+06	1.15104e+06	67.19	2.07845e+06	2.63367e+06	55.77	0.6	-0.73	0.104895	0.98	0.440144	1.03909	150.501	71.6	1.2
M151T72_2	5.64681e+08	5.80427e+08	15.89	5.86844e+08	6.09404e+08	28.73	0.96	-0.06	0.573737	0.24	0.846615	0.0715705	151.035	71.7	1.2
M152T112	1.01449e+06	693504	104.54	1.05911e+06	767321	52.6	0.96	-0.06	0.278632	0.55	0.649698	0.478164	152.082	112.1	1.9
M152T114	9.21864e+06	9.13335e+06	15.42	1.20398e+07	1.15181e+07	34.94	0.77	-0.39	0.194872	0.71	0.56435	1.16161	152.038	113.9	1.9
M152T140	5.38476e+07	5.27341e+07	20.52	7.33415e+07	7.05669e+07	35.23	0.73	-0.45	0.104895	0.98	0.440144	1.39218	152.057	139.7	2.3
M152T174	6.38187e+07	6.15052e+07	24.93	5.53452e+07	5.6729e+07	40.61	1.15	0.21	0.505361	0.3	0.809141	0.800994	152.057	174.1	2.9
M152T279	3.32126e+07	2.96242e+07	35.24	4.97359e+07	4.56561e+07	20.81	0.67	-0.58	0.0281274	1.55	0.261699	1.86592	152.057	279.1	4.7
M152T302	517217	250403	104.8	506750	226812	103.98	1.02	0.03	0.328205	0.48	0.69011	0.0460698	152.1	302.3	5
M152T303	893271	988377	45.86	695828	642183	56.88	1.28	0.36	0.194872	0.71	0.56435	0.772305	152.057	302.5	5
M152T329	530903	455272	42.69	974166	1.01506e+06	48.28	0.54	-0.88	0.0649573	1.19	0.368412	1.47759	152.057	329.1	5.5
M152T387	719323	640359	27.42	684812	680948	27.34	1.05	0.07	0.95913	0.02	0.990641	0.222693	152.071	386.7	6.4
M152T398	1.14083e+07	1.06351e+07	44.44	6.25815e+06	5768755	56.83	1.82	0.87	0.014763	1.83	0.200021	1.82515	152.107	397.6	6.6
M152T417	543982	482781	63.57	171894	77719.9	102.46	3.16	1.66	0.0104118	1.98	0.169968	1.79264	152.034	416.6	6.9
M152T462	360616	368619	56.92	358684	280523	60.66	1.01	0.01	0.878477	0.06	0.967431	0.0797412	152.143	462	7.7
M152T485	3.31017e+06	2.81601e+06	43.74	2.29153e+06	1.26667e+06	90.29	1.44	0.53	0.194872	0.71	0.56435	1.18314	152.107	485	8.1
M152T525	1.38576e+06	1.22375e+06	32.12	3.11349e+06	3.25958e+06	43.86	0.45	-1.17	0.0206682	1.68	0.228643	1.99762	152.071	525.4	8.8
M152T620	4.27347e+06	3.73234e+06	76.79	1.01026e+07	1.03579e+07	47.06	0.42	-1.24	0.0379176	1.42	0.297283	1.66207	152.017	620.1	10.3
M152T70	656598	585064	78.12	643539	643957	37.05	1.02	0.03	0.798446	0.1	0.941385	0.526891	152.123	69.8	1.2
M152T72	7.14262e+07	7.362e+07	41.7	9.75903e+07	9.06707e+07	35.59	0.73	-0.45	0.194872	0.71	0.56435	1.14903	152.036	71.7	1.2
M152T73	5.73012e+06	5.90864e+06	19.71	6.65388e+06	6.82059e+06	8.41	0.86	-0.22	0.0649573	1.19	0.368412	1.38913	151.95	73.1	1.2
M152T78	835089	830848	12.81	854132	841889	19.12	0.98	-0.03	1	0	1	0.138717	152.068	77.9	1.3
M153T109	1.92158e+06	1.98132e+06	17.78	2.08921e+06	2.17979e+06	38.34	0.92	-0.12	0.278632	0.55	0.649698	0.0191382	153.102	108.6	1.8
M153T122	7.87155e+08	7.25815e+08	30.5	4.38189e+08	4.11897e+08	49.67	1.8	0.85	0.014763	1.83	0.200021	1.82747	153.041	121.9	2
M153T160	4.47328e+08	4.84172e+08	38.51	5.39669e+08	4.80195e+08	19.7	0.83	-0.27	0.505361	0.3	0.809141	1.04621	153.041	160.3	2.7
M153T197	1.2363e+07	1.3512e+07	30.36	1.32713e+07	1.31648e+07	7.32	0.93	-0.1	0.95913	0.02	0.990641	0.510674	153.066	196.8	3.3
M153T256	9.16776e+06	9.13991e+06	11.96	9.8532e+06	9.82027e+06	10.98	0.93	-0.1	0.278632	0.55	0.649698	0.898195	153.066	256.1	4.3
M153T278	2.34698e+06	2.09786e+06	37.65	2.87488e+06	2.53266e+06	54.45	0.82	-0.29	0.720901	0.14	0.912378	0.485442	153.06	278.2	4.6
M153T318	3.72642e+07	3.45714e+07	20.68	2.05748e+07	1.62329e+07	45.28	1.81	0.86	0.0029526	2.53	0.116769	2.13384	153.041	318.1	5.3
M153T403	510682	502160	14.37	563560	560249	20.57	0.91	-0.14	0.441803	0.35	0.769616	0.774062	153.102	403	6.7
M153T620	277208	280057	18.17	287596	294559	33.42	0.96	-0.05	0.878477	0.06	0.967431	0.00250079	153.02	620.2	10.3
M153T629	5.02288e+06	4.77205e+06	28.08	5.36057e+06	5.21654e+06	42.12	0.94	-0.09	0.645377	0.19	0.878848	0.0913704	153.091	628.6	10.5
M153T72	9.95342e+07	1.01763e+08	66.23	9.87935e+07	1.00761e+08	35.77	1.01	0.01	0.720901	0.14	0.912378	0.516967	153.033	71.7	1.2
M153T90	2.8052e+06	2.75929e+06	36.08	2.28567e+06	2.18821e+06	34.53	1.23	0.3	0.278632	0.55	0.649698	0.831539	153.076	90.1	1.5
M154T111	2.13467e+06	2.07949e+06	9.62	1.45436e+06	1.28782e+06	56.24	1.47	0.55	0.0829837	1.08	0.403171	1.5822	154.097	111.2	1.9
M154T114	1.40453e+07	1.20424e+07	34.73	1.39399e+07	1.1937e+07	38.05	1.01	0.01	1	0	1	0.103587	154.003	114.3	1.9
M154T115	2.00735e+06	1.89924e+06	26.01	1.41391e+06	1.44076e+06	25.71	1.42	0.51	0.0206682	1.68	0.228643	1.7084	154.086	114.9	1.9
M154T122_1	1.04787e+07	7.25925e+06	81.46	4.31466e+06	4.60902e+06	49.96	2.43	1.28	0.00699301	2.16	0.14968	1.81828	154.025	122	2
M154T122_2	2.61041e+07	2.57646e+07	10.38	1.99069e+07	1.97512e+07	21.2	1.31	0.39	0.004662	2.33	0.129379	1.97827	154.044	122	2
M154T160_2	2.82749e+07	2.36756e+07	79.51	1.78897e+07	1.61085e+07	71.4	1.58	0.66	0.328205	0.48	0.69011	0.849461	154.044	160.2	2.7
M154T196	2.88924e+06	2.69093e+06	28.03	3.38011e+06	3.60418e+06	38.61	0.85	-0.23	0.441803	0.35	0.769616	0.381002	154.05	196.3	3.3
M154T280	1.30397e+06	21488.3	184.29	1.01026e+06	30089.2	179.92	1.29	0.37	0.645377	0.19	0.878848	0.30491	154.021	279.8	4.7
M154T341	2.04348e+06	1.64234e+06	88.47	2.29347e+06	1.99243e+06	46.72	0.89	-0.17	0.645377	0.19	0.878848	0.911048	154.061	340.8	5.7
M154T400	4.17536e+08	3.6869e+08	39.89	4.18584e+08	4.59175e+08	28.98	1	0	0.278632	0.55	0.649698	0.00413359	154.042	399.5	6.7
M154T582	2.57994e+06	1.86254e+06	64.66	3.93908e+06	1.96409e+06	89.46	0.65	-0.61	0.645377	0.19	0.878848	0.343946	154.042	581.8	9.7
M154T72	4.76801e+06	4.65787e+06	6.03	4.91202e+06	4.93923e+06	4.85	0.97	-0.04	0.278632	0.55	0.649698	0.860537	154.036	71.8	1.2
M154T95	1.3443e+07	9785156	58.47	1.27431e+07	1.41614e+07	32.81	1.05	0.08	0.878477	0.06	0.967431	0.177321	154.059	94.5	1.6
M155T114	897174	1.05969e+06	50.23	776320	902890	50.5	1.16	0.21	0.328205	0.48	0.69011	0.392711	154.504	114.3	1.9
M155T160	1.14308e+06	1.15658e+06	27.96	1.10103e+06	1.14097e+06	46.1	1.04	0.05	1	0	1	0.536121	155.045	160.1	2.7
M155T432	7.90394e+06	7.74988e+06	35.26	6535586	6.12928e+06	27.99	1.21	0.27	0.278632	0.55	0.649698	0.640969	155.155	432.3	7.2
M155T517	7.77939e+06	7.72515e+06	44.24	5.02642e+06	4.55394e+06	46.74	1.55	0.63	0.104895	0.98	0.440144	1.23433	155.107	516.5	8.6
M155T570	247429	239136	39.14	273789	200895	78.32	0.9	-0.15	0.573737	0.24	0.846615	0.0586278	155.06	569.8	9.5
M155T604	919432	796819	55.49	931427	896650	49.82	0.99	-0.02	0.95913	0.02	0.990641	0.0630557	155.047	603.6	10.1
M155T72	1.30309e+06	1.27013e+06	11.66	1.33991e+06	1.21712e+06	31.66	0.97	-0.04	0.573737	0.24	0.846615	0.0151582	155.03	71.8	1.2
M155T77	2.19146e+06	2.0148e+06	20.69	1.87225e+06	1.94259e+06	11.48	1.17	0.23	0.234499	0.63	0.606344	1.29097	155.079	77.3	1.3
M155T798	2.79276e+08	2.64042e+08	42.46	2.86043e+08	2.7703e+08	30.4	0.98	-0.03	0.720901	0.14	0.912378	0.15187	154.99	798	13.3
M155T84	6.87206e+06	6.80242e+06	9.76	7334518	7.06181e+06	11.5	0.94	-0.09	0.278632	0.55	0.649698	0.882752	155.043	83.5	1.4
M155T90	3.25828e+06	3.37751e+06	20.19	3.80285e+06	3.48845e+06	33.95	0.86	-0.22	0.382284	0.42	0.730096	0.78416	155.01	90.4	1.5
M155T98	2.45973e+06	2.34385e+06	23.05	2.86501e+06	2.85981e+06	27.73	0.86	-0.22	0.160528	0.79	0.521677	0.772756	155.072	97.8	1.6
M156T114	1.00122e+07	7.30357e+06	82.19	9.97312e+06	7.19424e+06	76.19	1	0.01	0.878477	0.06	0.967431	0.203008	156.059	114.3	1.9
M156T181	3.31449e+06	3.55458e+06	32.24	3.06206e+06	3.55814e+06	38.73	1.08	0.11	0.645377	0.19	0.878848	0.492187	156.138	181	3
M156T400	2.1218e+08	2.05092e+08	27.72	1.68431e+08	1.40881e+08	50.81	1.26	0.33	0.234499	0.63	0.606344	1.17974	156.039	399.5	6.7
M156T407	2.09678e+06	1.9459e+06	43	1.12663e+06	916103	43.93	1.86	0.9	0.014763	1.83	0.200021	1.77872	156.066	407.2	6.8
M156T427	2.12127e+06	2.04485e+06	13.28	2.40018e+06	2.05966e+06	39.77	0.88	-0.18	0.720901	0.14	0.912378	0.433544	156.102	427.4	7.1
M156T502	867361	736959	27.77	756882	706339	29.27	1.15	0.2	0.278632	0.55	0.649698	0.803842	156.08	502.1	8.4
M156T582	242495	247038	46.36	448300	257182	92.01	0.54	-0.89	0.798446	0.1	0.941385	0.378894	156.039	581.8	9.7
M156T606	1.30067e+06	1.50794e+06	34.22	1.4999e+06	1.3569e+06	53.22	0.87	-0.21	0.720901	0.14	0.912378	0.33176	156.128	606	10.1
M156T72	1.34042e+07	1.25171e+07	48	1.14236e+07	1.00558e+07	37.47	1.17	0.23	0.645377	0.19	0.878848	0.482042	156.014	71.7	1.2
M156T76	291305	249939	89.92	340097	279008	85.75	0.86	-0.22	0.645377	0.19	0.878848	0.38382	156.15	76	1.3
M156T776	1.65769e+07	1.81587e+07	28.7	1.67778e+07	1.90669e+07	39.63	0.99	-0.02	0.720901	0.14	0.912378	0.135914	156.12	776.3	12.9
M156T815	2.458e+06	2.17166e+06	47.86	2.41442e+06	2.36996e+06	38.53	1.02	0.03	1	0	1	0.0376562	156.138	815.4	13.6
M156T83	1.54348e+08	1.61968e+08	9.66	9.17942e+07	7.58331e+07	71.1	1.68	0.75	0.194872	0.71	0.56435	1.72891	156.077	82.8	1.4
M157T102	3.32748e+06	3.04568e+06	36.09	2.82614e+06	2.73015e+06	45.93	1.18	0.24	0.573737	0.24	0.846615	0.800191	156.961	102.1	1.7
M157T108	8.803e+06	8.45713e+06	24.44	9.04674e+06	8.58207e+06	21.62	0.97	-0.04	0.798446	0.1	0.941385	0.142271	157.097	108.2	1.8
M157T114	26063.6	14869.7	136.11	203942	203776	55.58	0.13	-2.97	0.004662	2.33	0.129379	1.97425	157.011	114.1	1.9
M157T115	75110.5	75146.4	40.32	159069	138385	77.49	0.47	-1.08	0.328205	0.48	0.69011	0.912276	157.043	114.7	1.9
M157T357	489520	355967	67.73	420787	385882	31.88	1.16	0.22	0.798446	0.1	0.941385	0.176208	157.038	356.6	5.9
M157T397	178086	212553	68.27	146970	158960	52.96	1.21	0.28	0.382284	0.42	0.730096	0.211341	157.076	397	6.6
M157T400	1.09182e+07	7.78817e+06	58.85	9.67668e+06	1.02852e+07	43.64	1.13	0.17	0.798446	0.1	0.941385	0.207224	157.042	399.5	6.7
M157T564	2.63839e+06	2.86208e+06	51.88	2.63522e+06	2.97232e+06	37.17	1	0	0.95913	0.02	0.990641	0.0890217	157.134	563.6	9.4
M157T606	173100	122874	51.37	195179	115827	77.9	0.89	-0.17	0.720901	0.14	0.912378	0.0346633	156.63	606.1	10.1
M157T65	1.57294e+06	1.43799e+06	32.96	1.8584e+06	1.81536e+06	20.06	0.85	-0.24	0.130381	0.88	0.480121	1.20341	156.965	64.6	1.1
M157T707	337646	311723	26.15	322557	306378	41.34	1.05	0.07	0.720901	0.14	0.912378	0.412366	157.05	707.2	11.8
M157T72	953583	927813	18.16	954460	963071	24.53	1	0	0.878477	0.06	0.967431	0.109715	157.015	71.7	1.2
M157T74	1.84241e+07	1.85517e+07	3.48	2.00075e+07	1.86202e+07	16.09	0.92	-0.12	0.645377	0.19	0.878848	0.952364	157.17	74.4	1.2
M157T801	3.1315e+07	2.77292e+07	45.18	3.93859e+07	4.1142e+07	41.95	0.8	-0.33	0.441803	0.35	0.769616	0.672168	156.991	801.4	13.4
M157T90	1.90741e+06	582766	154.31	4.52838e+06	3.12349e+06	89.22	0.42	-1.25	0.0379176	1.42	0.297283	1.48502	156.99	90.1	1.5
M157T99	2.61663e+06	2.44321e+06	47.59	4.15653e+06	3.71705e+06	66.42	0.63	-0.67	0.278632	0.55	0.649698	0.987045	157.097	98.6	1.6
M158T108	3.73895e+06	3.52716e+06	15.64	1.78815e+06	1.57857e+06	92.09	2.09	1.06	0.00699301	2.16	0.14968	1.7466	158.1	108.3	1.8
M158T112	1.86623e+06	1.8648e+06	10.25	1.61402e+06	1.58594e+06	10.77	1.16	0.21	0.0104118	1.98	0.169968	1.80833	158.045	112	1.9
M158T115_1	9.1991e+06	9.35848e+06	6.82	6.18799e+06	5.94635e+06	57.13	1.49	0.57	0.160528	0.79	0.521677	1.51301	158.081	115.1	1.9
M158T115_2	2.01983e+06	1.95596e+06	23.46	2.00539e+06	1.86449e+06	49.57	1.01	0.01	0.573737	0.24	0.846615	0.302414	158.118	115.1	1.9
M158T116	320795	328206	35.77	300851	281987	41.77	1.07	0.09	0.505361	0.3	0.809141	0.299304	158.027	116.4	1.9
M158T135	5.96908e+06	4.51904e+06	67.83	4.90933e+06	3.89496e+06	67.68	1.22	0.28	0.645377	0.19	0.878848	0.43933	158.081	135.4	2.3
M158T356	1.44276e+07	1.70215e+07	53.49	1.47774e+07	1.55637e+07	63.12	0.98	-0.03	0.645377	0.19	0.878848	0.00738538	158.036	356.4	5.9
M158T375	213035	213484	6.85	215099	217136	14.95	0.99	-0.01	0.645377	0.19	0.878848	0.03449	158.064	374.9	6.2
M158T403	2.74993e+06	2.87066e+06	30.05	2.64815e+06	2.75612e+06	26.86	1.04	0.05	0.798446	0.1	0.941385	0.141541	158.001	403.3	6.7
M158T511	2.82105e+06	2.65538e+06	44.43	2.46489e+06	1.7536e+06	68.85	1.14	0.19	0.278632	0.55	0.649698	0.664476	158.117	511.5	8.5
M158T576	8.05883e+06	6.55036e+06	94.45	6.55369e+06	4.74379e+06	113.89	1.23	0.3	0.798446	0.1	0.941385	0.363777	158.001	576	9.6
M158T59	1.70281e+07	1.61632e+07	17.2	1.76223e+07	1.79352e+07	25.27	0.97	-0.05	0.95913	0.02	0.990641	0.115435	158.002	58.9	1
M158T634	1.83128e+07	1.99711e+07	54.12	1.62473e+07	1.5166e+07	31.07	1.13	0.17	0.441803	0.35	0.769616	0.0400169	158.001	634	10.6
M158T685	458029	407439	52.22	457218	335137	79.12	1	0	0.798446	0.1	0.941385	0.357902	158.19	685.2	11.4
M158T707	318825	293680	31.13	260838	258835	22.55	1.22	0.29	0.234499	0.63	0.606344	1.02095	158.036	706.5	11.8
M158T74_1	7.93985e+06	7.26378e+06	26.32	9.02176e+06	9.63539e+06	23.51	0.88	-0.18	0.328205	0.48	0.69011	0.729867	158.002	74.2	1.2
M158T74_2	1.21379e+06	1.31371e+06	30.48	1.06598e+06	1.10312e+06	30.14	1.14	0.19	0.441803	0.35	0.769616	0.628183	158.173	74.5	1.2
M158T742	8.67532e+06	7.91621e+06	44.67	8.25907e+06	9.67479e+06	40.2	1.05	0.07	0.798446	0.1	0.941385	0.200461	158.154	742	12.4
M158T760	1.35992e+08	1.29931e+08	25.88	1.65613e+08	1.3467e+08	52.39	0.82	-0.28	0.798446	0.1	0.941385	0.543061	158.154	759.9	12.7
M158T83	1.315e+06	1.63231e+06	54.53	1.57459e+06	1774803	45.74	0.84	-0.26	0.505361	0.3	0.809141	0.412273	158.093	83.3	1.4
M158T832	4.51323e+07	4.5931e+07	15.67	4.54509e+07	47333892	19.82	0.99	-0.01	0.720901	0.14	0.912378	0.0582443	158.154	832.2	13.9
M159T112	152812	123991	46.43	345456	273556	70.33	0.44	-1.18	0.0498834	1.3	0.330421	1.54068	159.011	112.5	1.9
M159T36	5.8253e+07	5.63497e+07	75.06	5.06494e+07	3.44449e+07	75	1.15	0.2	1	0	1	0.0177102	158.96	35.7	0.6
M159T397	1.48922e+07	1.50911e+07	39.41	2.0859e+07	2.20158e+07	31.81	0.71	-0.49	0.0829837	1.08	0.403171	1.19678	159.091	397.2	6.6
M159T403	1.56146e+07	1.15726e+07	72.34	1.88148e+07	1.84116e+07	70.1	0.83	-0.27	0.573737	0.24	0.846615	0.00306899	158.96	403.4	6.7
M159T596	911745	892832	30.97	746808	782709	27.32	1.22	0.29	0.278632	0.55	0.649698	0.977073	159.116	595.5	9.9
M159T672	369781	399265	29.49	399116	438960	24.63	0.93	-0.11	0.441803	0.35	0.769616	0.416656	159.081	672.4	11.2
M159T727	819163	834358	37.2	576510	488112	37.21	1.42	0.51	0.130381	0.88	0.480121	1.28182	159.117	727	12.1
M159T760	1.97039e+07	1.85847e+07	37.65	1.84941e+07	1.71206e+07	63.77	1.07	0.09	0.441803	0.35	0.769616	0.489798	159.157	760	12.7
M159T80	8.82258e+07	9.22838e+07	24.88	1.23802e+08	1.24739e+08	33.42	0.71	-0.49	0.0379176	1.42	0.297283	1.44924	158.964	79.5	1.3
M159T91	895316	896596	14.71	1.17048e+06	1.14077e+06	25.35	0.76	-0.39	0.0498834	1.3	0.330421	1.53055	159.017	91	1.5
M159T99	1.22436e+06	1.26128e+06	31.39	1.00182e+06	1.29181e+06	48.31	1.22	0.29	0.798446	0.1	0.941385	0.685988	159.1	98.7	1.6
M160T100	727246	755167	30.52	774749	840320	29.38	0.94	-0.09	0.382284	0.42	0.730096	0.273699	160.06	99.8	1.7
M160T103	2.23749e+07	2.30785e+07	14.92	1.95322e+07	1.86492e+07	12.66	1.15	0.2	0.104895	0.98	0.440144	1.41215	160.097	103	1.7
M160T112	5.96448e+06	5.50582e+06	19.83	5.29564e+06	5.82068e+06	35.69	1.13	0.17	0.798446	0.1	0.941385	0.74527	160.097	111.7	1.9
M160T119	2.5241e+09	2.55067e+09	17.02	1.34636e+09	1.5781e+09	62.04	1.87	0.91	0.0010878	2.96	0.0833774	1.62719	160.133	118.8	2
M160T136	6.51977e+06	6.33589e+06	14.78	6.70403e+06	6.6745e+06	15.89	0.97	-0.04	0.720901	0.14	0.912378	0.319836	159.968	136	2.3
M160T32	2.24465e+07	1.54308e+07	59.23	4.00096e+07	3.79977e+07	38.28	0.56	-0.83	0.0829837	1.08	0.403171	1.65421	159.97	31.9	0.5
M160T397_1	1.58313e+06	1.23584e+06	76.32	1.09312e+06	1.23509e+06	69.75	1.45	0.53	0.505361	0.3	0.809141	0.917271	160.076	397.2	6.6
M160T397_2	2.7396e+06	2.66727e+06	35.01	2.59903e+06	1.72008e+06	73.07	1.05	0.08	0.505361	0.3	0.809141	0.618644	160.095	397	6.6
M160T486	1.1096e+06	1.01049e+06	32.41	1.32425e+06	1.38056e+06	29.17	0.84	-0.26	0.160528	0.79	0.521677	0.818036	160.097	485.7	8.1
M160T69	1.88949e+07	1.88497e+07	3.64	1.98068e+07	1.99182e+07	8.64	0.95	-0.07	0.382284	0.42	0.730096	0.953957	159.97	68.8	1.1
M160T87	3.73006e+06	3.72454e+06	26.34	3.84035e+06	3.90522e+06	7.09	0.97	-0.04	0.645377	0.19	0.878848	0.427895	160.097	87.4	1.5
M161T111	918731	508290	84.95	487371	370712	66.61	1.89	0.91	0.328205	0.48	0.69011	1.06707	161.1	111.3	1.9
M161T119	1.63798e+08	1.62328e+08	34.2	1.2322e+08	1.30612e+08	33.44	1.33	0.41	0.0829837	1.08	0.403171	1.0102	161.137	118.8	2
M161T127	9.44044e+06	9.91872e+06	25.35	1.00075e+07	9.79042e+06	26.17	0.94	-0.08	0.720901	0.14	0.912378	0.380601	161.003	127.4	2.1
M161T34	1.63209e+07	1.60425e+07	12.63	1.54602e+07	1.53068e+07	10.05	1.06	0.08	0.382284	0.42	0.730096	0.651988	161.002	33.6	0.6
M161T352	8.06349e+06	4.52117e+06	71.4	8.16113e+06	8.22657e+06	45.79	0.99	-0.02	0.878477	0.06	0.967431	0.322271	161.004	351.7	5.9
M161T356	2.06446e+06	1.42233e+06	104.56	888539	142032	210.68	2.32	1.22	0.160528	0.79	0.521677	1.27164	160.538	356.4	5.9
M161T384	7.08464e+06	6.68937e+06	65.64	1.49642e+08	6.49541e+06	263.95	0.05	-4.4	0.798446	0.1	0.941385	0.908441	161.002	383.5	6.4
M161T404	7.55417e+06	8.0698e+06	35.85	6.7334e+06	7.00975e+06	38.02	1.12	0.17	0.798446	0.1	0.941385	0.321106	161.002	404.1	6.7
M161T428	2.71456e+06	2.29994e+06	59.35	1.68033e+06	1.20693e+06	70.37	1.62	0.69	0.130381	0.88	0.480121	0.991371	161.107	427.8	7.1
M161T433	172164	170747	44.32	153602	159567	14.24	1.12	0.16	0.798446	0.1	0.941385	0.0225579	161.071	432.6	7.2
M161T463	281988	276234	24.22	281658	272920	25.21	1	0	1	0	1	0.0134547	161.136	463.4	7.7
M161T63	1.71272e+07	1.53225e+07	59.28	1.25728e+07	1.08457e+07	50.36	1.36	0.45	0.505361	0.3	0.809141	0.621636	161.002	63	1
M161T665	1.20077e+06	1.17902e+06	20.98	1.06119e+06	1.01615e+06	34.11	1.13	0.18	0.278632	0.55	0.649698	0.855194	161.096	664.8	11.1
M161T72	3.60976e+06	3.38515e+06	59.92	3.577e+06	3.04488e+06	70.8	1.01	0.01	0.878477	0.06	0.967431	0.137742	161.03	71.8	1.2
M161T742	2.59364e+06	2.39301e+06	43.35	2.97833e+06	2.18776e+06	57.25	0.87	-0.2	0.798446	0.1	0.941385	0.326588	161.096	742.2	12.4
M161T768	5.58968e+06	5.31467e+06	30.82	3.88491e+06	4.20122e+06	38.43	1.44	0.52	0.0829837	1.08	0.403171	1.49502	161.096	767.6	12.8
M161T77	8.32684e+06	9.09959e+06	47.18	1.03521e+07	1.05793e+07	28.61	0.8	-0.31	0.328205	0.48	0.69011	0.907775	161.128	77.1	1.3
M161T82	1.75087e+06	1.78155e+06	14.75	1.38197e+06	1.36565e+06	18.38	1.27	0.34	0.0206682	1.68	0.228643	1.77051	160.92	82.1	1.4
M161T83	3.05733e+06	3.11061e+06	34.16	3.04754e+06	2.90727e+06	12.87	1	0	0.798446	0.1	0.941385	0.163134	161.128	82.7	1.4
M161T98	6.93865e+06	7.59831e+06	36.12	7.52263e+06	7.42044e+06	32.53	0.92	-0.12	0.798446	0.1	0.941385	0.483315	161.092	97.7	1.6
M162T114	5.41711e+07	5.52082e+07	10.76	6.90081e+07	6.8433e+07	26.14	0.78	-0.35	0.0281274	1.55	0.261699	1.41291	162.113	114.3	1.9
M162T119	1.97511e+06	199428	167.78	1.20897e+06	141024	174.6	1.63	0.71	0.0829837	1.08	0.403171	0.804204	162.137	118.7	2
M162T120	1.82931e+07	1.90761e+07	41.58	1.89071e+07	1.79135e+07	35.47	0.97	-0.05	1	0	1	0.16631	162.076	119.6	2
M162T129	1.9167e+07	1.97525e+07	12.83	2.19483e+07	2.164e+07	15.4	0.87	-0.2	0.0829837	1.08	0.403171	1.26477	162.113	129	2.1
M162T290	2.6236e+06	2.7739e+06	52.13	1.43282e+06	1.2496e+06	57.78	1.83	0.87	0.0649573	1.19	0.368412	1.42818	162.076	289.6	4.8
M162T34	1.29655e+07	1.29013e+07	35.35	1.47667e+07	1.38786e+07	24.27	0.88	-0.19	0.573737	0.24	0.846615	0.780467	162.001	34.3	0.6
M162T364	2.50724e+06	1.3404e+06	99.94	2.12849e+06	1.94494e+06	67.22	1.18	0.24	0.798446	0.1	0.941385	0.0513066	162.004	364.1	6.1
M162T367	490686	342513	81.27	1.03026e+06	1.01694e+06	84.03	0.48	-1.07	0.382284	0.42	0.730096	0.432477	162.066	366.6	6.1
M162T597	694554	638099	53.84	406199	324839	48.42	1.71	0.77	0.0829837	1.08	0.403171	1.29736	162.091	597	9.9
M162T64	1.74923e+07	1.52464e+07	72.54	1.19438e+07	9.59118e+06	51.02	1.46	0.55	0.505361	0.3	0.809141	0.327174	162.001	64	1.1
M162T654	712744	705106	39.01	502857	478440	45.53	1.42	0.5	0.130381	0.88	0.480121	1.16446	162.091	653.9	10.9
M162T73	149501	143657	18.11	122432	124807	7.8	1.22	0.29	0.014763	1.83	0.200021	1.73579	162.453	73.3	1.2
M162T90_1	212585	104589	135.2	1.18702e+06	1.15945e+06	88.14	0.18	-2.48	0.0206682	1.68	0.228643	1.81886	161.991	89.5	1.5
M162T90_2	3.07645e+09	3.1794e+09	15.56	2.69942e+09	2.65503e+09	23.27	1.14	0.19	0.160528	0.79	0.521677	1.00608	162.113	89.5	1.5
M163T114	8.88945e+06	8.87275e+06	4.44	9.41428e+06	9.46695e+06	6.95	0.94	-0.08	0.104895	0.98	0.440144	1.35574	163.115	114.1	1.9
M163T127	1.15813e+08	1.19478e+08	9.48	8.45634e+07	8.26062e+07	43.85	1.37	0.45	0.160528	0.79	0.521677	1.55569	162.998	126.8	2.1
M163T161	4.48704e+07	3.94337e+07	73.75	9.65686e+07	9.03432e+07	62.83	0.46	-1.11	0.0829837	1.08	0.403171	0.821149	162.996	161.1	2.7
M163T195	1.18655e+08	1.25927e+08	18.87	7.46818e+07	6.48969e+07	64.14	1.59	0.67	0.0829837	1.08	0.403171	1.66121	162.996	194.8	3.2
M163T212	1.31637e+08	1.30431e+08	20.37	5.35861e+07	4.91342e+07	99.99	2.46	1.3	0.0029526	2.53	0.116769	1.80677	162.996	211.8	3.5
M163T230	1.1025e+08	1.03283e+08	28.04	1.05315e+08	1.15444e+08	34.43	1.05	0.07	0.878477	0.06	0.967431	0.440973	162.996	229.8	3.8
M163T250	2.07149e+07	2.03214e+07	30.19	2.85804e+07	2.62616e+07	40.05	0.72	-0.46	0.234499	0.63	0.606344	1.06289	162.998	250.4	4.2
M163T265	5.6711e+07	5.05632e+07	40.56	6.71642e+07	4.8968e+07	51.57	0.84	-0.24	0.878477	0.06	0.967431	0.524361	162.996	264.7	4.4
M163T280	4.73585e+06	4.5848e+06	28.52	3.20875e+06	3.26247e+06	25.38	1.48	0.56	0.0206682	1.68	0.228643	1.85528	163.026	279.7	4.7
M163T300	8.48524e+07	7.57614e+07	40.17	9.54798e+07	9.00416e+07	45.18	0.89	-0.17	0.645377	0.19	0.878848	0.354056	163.001	299.9	5
M163T325	9.41997e+07	5.68601e+07	79.12	1.14255e+08	9.34024e+07	61.35	0.82	-0.28	0.441803	0.35	0.769616	0.631738	162.996	325.1	5.4
M163T33	1.64789e+08	1.65707e+08	25.09	1.54243e+08	1.58534e+08	23.82	1.07	0.1	0.798446	0.1	0.941385	0.357611	163	32.8	0.5
M163T348	8.64445e+07	8.02961e+07	14.39	6.15566e+07	5.80907e+07	25.71	1.4	0.49	0.0029526	2.53	0.116769	2.11137	163.001	347.9	5.8
M163T404	6.42829e+07	6.25124e+07	29.1	5.68416e+07	6.49848e+07	48.98	1.13	0.18	0.95913	0.02	0.990641	0.689883	162.996	404.3	6.7
M163T448	304422	290319	24.9	300462	281662	18.84	1.01	0.02	0.95913	0.02	0.990641	0.091123	163.09	447.9	7.5
M163T449	3.85345e+07	2.70765e+07	74.16	4.64811e+07	2.73734e+07	95.24	0.83	-0.27	1	0	1	0.243659	162.996	448.9	7.5
M163T472	1.33626e+07	1.31464e+07	68.1	1.61628e+07	1.94389e+07	65.64	0.83	-0.27	0.441803	0.35	0.769616	0.260562	163	471.9	7.9
M163T503	3.64354e+07	3.17566e+07	49.02	5.40858e+07	6.69292e+07	40.59	0.67	-0.57	0.104895	0.98	0.440144	1.13695	163.001	503.1	8.4
M163T517	4.30128e+07	4.21059e+07	47.07	9.46588e+06	9.73581e+06	41.87	4.54	2.18	0.0001554	3.81	0.0532196	2.55478	162.996	517.1	8.6
M163T539	3.1407e+07	2.82036e+07	42.21	2.40937e+07	2.35084e+07	18.54	1.3	0.38	0.382284	0.42	0.730096	0.973252	162.996	538.8	9
M163T573_1	3.02322e+06	2.98459e+06	49.22	3.28577e+06	2.99943e+06	47.66	0.92	-0.12	0.645377	0.19	0.878848	0.230231	163.146	573.2	9.6
M163T573_2	1.19522e+06	1.13628e+06	43.04	1.21248e+06	949464	69.58	0.99	-0.02	0.720901	0.14	0.912378	0.378099	163.48	573.2	9.6
M163T575	1.54267e+07	1.37674e+07	74.23	1.50845e+07	8.69221e+06	115.63	1.02	0.03	0.573737	0.24	0.846615	0.557859	163.133	574.6	9.6
M163T576	4.36304e+07	4.37517e+07	32.61	40178880	3.68248e+07	42.21	1.09	0.12	0.505361	0.3	0.809141	0.358204	163	575.5	9.6
M163T597	1.76841e+07	1.71394e+07	23.26	1.75793e+07	1.60506e+07	24.97	1.01	0.01	0.798446	0.1	0.941385	0.0727496	162.996	596.6	9.9
M163T608	1.37277e+07	1.33656e+07	23.1	1.36902e+07	1.23993e+07	32.02	1	0	0.720901	0.14	0.912378	0.14517	162.996	608	10.1
M163T612	1.14787e+06	1.23291e+06	31.71	965309	1.05265e+06	40.52	1.19	0.25	0.328205	0.48	0.69011	0.695068	163.112	611.6	10.2
M163T634	4.43067e+07	3.31793e+07	56.62	2.89564e+07	2.80812e+07	44.52	1.53	0.61	0.278632	0.55	0.649698	1.07934	162.996	634.2	10.6
M163T65	3.83515e+06	3.68919e+06	20.04	3.47582e+06	3.57233e+06	10.02	1.1	0.14	0.328205	0.48	0.69011	0.946343	163.133	64.7	1.1
M163T655	637298	445932	80.15	892013	728411	63.13	0.71	-0.49	0.328205	0.48	0.69011	0.864981	163.148	655.4	10.9
M163T680	6.49321e+06	6.45241e+06	41.09	6.92686e+06	6.94017e+06	36.36	0.94	-0.09	0.878477	0.06	0.967431	0.250373	162.995	680.3	11.3
M163T690	562807	532941	66.09	861465	806746	56.02	0.65	-0.61	0.441803	0.35	0.769616	1.10394	163.148	689.9	11.5
M163T707	3.82895e+07	3.87927e+07	19.31	3.31963e+07	3.34886e+07	47.83	1.15	0.21	0.234499	0.63	0.606344	0.911755	163.039	706.7	11.8
M163T721	661723	601953	44.36	1.23111e+06	1.2514e+06	55.91	0.54	-0.9	0.104895	0.98	0.440144	1.24879	163.075	721.3	12
M163T742	2.3226e+08	1.88517e+08	57.38	2.0418e+08	1.95752e+08	35.04	1.14	0.19	0.878477	0.06	0.967431	0.329645	163.112	741.6	12.4
M163T76_1	5.91142e+06	5.60703e+06	16.21	4.61083e+06	4.64957e+06	19.87	1.28	0.36	0.014763	1.83	0.200021	1.82849	163.084	75.9	1.3
M163T76_2	4.84581e+06	4.63769e+06	16.73	6.02615e+06	6.2133e+06	11.33	0.8	-0.31	0.0281274	1.55	0.261699	1.93427	163.108	75.7	1.3
M163T770	2.16883e+06	2.05616e+06	29.11	1.61143e+06	2.07232e+06	57.24	1.35	0.43	0.505361	0.3	0.809141	1.12173	163.148	770.4	12.8
M163T90	2.39612e+08	2.40225e+08	6.03	3.07927e+08	2.82251e+08	20.37	0.78	-0.36	0.0018648	2.73	0.096514	1.92887	163.116	89.5	1.5
M164T107	353687	347059	35.4	401349	422773	23.22	0.88	-0.18	0.234499	0.63	0.606344	0.674628	164.038	107.3	1.8
M164T189	3.43537e+06	3.32795e+06	16.81	3.14165e+06	2.56734e+06	50.18	1.09	0.13	0.130381	0.88	0.480121	0.836717	164.073	188.7	3.1
M164T222	3.64266e+06	3.65573e+06	20.49	3.9047e+06	3.91201e+06	15.22	0.93	-0.1	0.573737	0.24	0.846615	0.650183	164.073	221.9	3.7
M164T268	791898	787541	50.74	762569	907454	48.95	1.04	0.05	0.95913	0.02	0.990641	0.287252	164.074	268.1	4.5
M164T35	1.10405e+07	1.06726e+07	12.34	1.13247e+07	1.10538e+07	9.05	0.97	-0.04	0.573737	0.24	0.846615	0.40964	163.997	35.1	0.6
M164T371	230098	230615	18.11	212353	211432	4.39	1.08	0.12	0.441803	0.35	0.769616	0.856918	164.057	371.3	6.2
M164T394	212729	192275	50.24	73329.3	77299.3	36.46	2.9	1.54	0.0003108	3.51	0.0568482	2.32056	164.107	393.6	6.6
M164T404	1.73983e+06	1.73618e+06	16.22	1.60545e+06	1.75637e+06	22.67	1.08	0.12	0.798446	0.1	0.941385	0.712014	163.999	404.3	6.7
M164T575	1.04329e+06	1.05625e+06	31.04	1.53633e+06	1.42593e+06	47.49	0.68	-0.56	0.278632	0.55	0.649698	1.16208	164.136	574.7	9.6
M164T581	465347	468147	44.88	471150	329796	69.9	0.99	-0.02	0.720901	0.14	0.912378	0.16792	164.107	580.7	9.7
M164T685	297382	271471	44.73	309157	299114	31.15	0.96	-0.06	0.720901	0.14	0.912378	0.383889	164.107	684.6	11.4
M164T707	5.79694e+06	5.66371e+06	18.66	4.30575e+06	4.19163e+06	47.74	1.35	0.43	0.130381	0.88	0.480121	1.22416	164.042	706.7	11.8
M164T742	2.57812e+07	2.19752e+07	54.31	2.28426e+07	2.05442e+07	50.8	1.13	0.17	0.798446	0.1	0.941385	0.485959	164.115	741.6	12.4
M164T83	4.74155e+06	4.79968e+06	4.81	4.79796e+06	4.6296e+06	10.25	0.99	-0.02	0.645377	0.19	0.878848	0.185966	164.008	83.1	1.4
M164T84	5.24644e+07	5.23841e+07	35.06	5.71689e+07	6.19136e+07	57.11	0.92	-0.12	0.573737	0.24	0.846615	0.205494	163.978	84.2	1.4
M164T90	4.35484e+07	4.44308e+07	15.26	4.52365e+07	5.3054e+07	54.43	0.96	-0.05	0.573737	0.24	0.846615	0.429239	164.117	89.5	1.5
M165T101	877987	872701	6.86	982487	937552	9.59	0.89	-0.16	0.0281274	1.55	0.261699	1.71381	165.076	100.6	1.7
M165T107	1.51334e+06	1.42902e+06	14.59	952719	881375	32.53	1.59	0.67	0.00699301	2.16	0.14968	2.17454	165.113	106.8	1.8
M165T124	3.99348e+08	3.66127e+08	70.35	3.49242e+08	4.06293e+08	52.27	1.14	0.19	0.95913	0.02	0.990641	0.198932	165.054	124.3	2.1
M165T140	9.49255e+07	9.78756e+07	28.21	1.33454e+08	1.27449e+08	44.41	0.71	-0.49	0.0829837	1.08	0.403171	1.28507	165.054	139.6	2.3
M165T319	1.02673e+06	784720	53.75	1.63426e+06	794450	103.88	0.63	-0.67	0.720901	0.14	0.912378	0.0446679	165.066	319.1	5.3
M165T332	2.6075e+06	1.59461e+06	59.78	2.14503e+06	1.86348e+06	40.09	1.22	0.28	0.95913	0.02	0.990641	0.282646	165.113	332.1	5.5
M165T344	2.37392e+06	2.172e+06	76.97	2.8881e+06	2.78852e+06	26.53	0.82	-0.28	0.505361	0.3	0.809141	1.05775	165.113	343.8	5.7
M165T360	1.46306e+06	1.47137e+06	21.03	1.58451e+06	1.40354e+06	27.24	0.92	-0.12	0.95913	0.02	0.990641	0.42147	165.113	359.6	6
M165T400	1.24533e+06	1.4755e+06	48.29	1.26001e+06	1.19883e+06	34.13	0.99	-0.02	1	0	1	0.321746	165.01	399.5	6.7
M165T555	655295	672139	38.02	536368	558793	26.79	1.22	0.29	0.328205	0.48	0.69011	0.74534	165.102	555.2	9.3
M165T64	8.65399e+06	7.88429e+06	26.79	9.42415e+06	1.12675e+07	43.73	0.92	-0.12	0.505361	0.3	0.809141	0.102547	164.994	64	1.1
M165T701	862171	796831	34.19	686977	677604	26.69	1.26	0.33	0.0829837	1.08	0.403171	0.8485	165.127	701.2	11.7
M165T741	1.12855e+06	1.21988e+06	25.22	1.11586e+06	927306	50	1.01	0.02	0.645377	0.19	0.878848	0.34488	165.118	741.5	12.4
M165T746	1.06261e+06	1.27492e+06	43.6	874132	753735	50.96	1.22	0.28	0.382284	0.42	0.730096	0.617407	165.091	745.6	12.4
M165T801	1.01806e+06	1.0257e+06	17.51	998910	897176	54.69	1.02	0.03	0.878477	0.06	0.967431	0.527169	165.076	801.5	13.4
M165T82	2.71219e+07	2.53596e+07	24.43	2.60039e+07	2.7089e+07	19.71	1.04	0.06	0.95913	0.02	0.990641	0.269231	164.93	81.8	1.4
M165T98	563772	503301	50.04	1.35848e+06	1.21105e+06	73.85	0.42	-1.27	0.0379176	1.42	0.297283	1.58439	165.113	97.7	1.6
M165T99	676367	643619	36.61	702285	659527	50.26	0.96	-0.05	0.95913	0.02	0.990641	0.102327	165.1	98.5	1.6
M166T122	3.29912e+06	2.43047e+06	84.1	2.06707e+07	2.00926e+07	80.8	0.16	-2.65	0.104895	0.98	0.440144	1.54392	166.086	121.6	2
M166T124	2.0618e+07	1.9231e+07	24.16	2.3617e+07	2.08051e+07	31.7	0.87	-0.2	0.505361	0.3	0.809141	0.710762	166.058	124.4	2.1
M166T137	2.32382e+06	2.43624e+06	23.64	1.28311e+06	815953	95.17	1.81	0.86	0.130381	0.88	0.480121	1.63275	165.998	136.5	2.3
M166T139	7.75972e+06	7.59346e+06	13.62	6.16488e+06	5.86539e+06	28.28	1.26	0.33	0.0649573	1.19	0.368412	1.58999	166.058	139.4	2.3
M166T33	6.30931e+06	6.13654e+06	12.87	7.35828e+06	7.19405e+06	10.23	0.86	-0.22	0.0206682	1.68	0.228643	1.7732	165.981	33.1	0.6
M166T332	6.37666e+06	6.19276e+06	10.86	4.80185e+06	4.84936e+06	19.93	1.33	0.41	0.0018648	2.73	0.096514	2.05801	166.073	331.5	5.5
M166T338_2	4.79905e+09	4.65841e+09	30.82	5.60278e+09	5.06853e+09	41.53	0.86	-0.22	0.573737	0.24	0.846615	0.5284	166.086	338.4	5.6
M166T338_3	2.35671e+06	2.31259e+06	12.39	1.72845e+06	1.71352e+06	21.05	1.36	0.45	0.0018648	2.73	0.096514	2.11614	166.212	338.4	5.6
M166T497	425885	426690	26.72	608529	608589	12.66	0.7	-0.51	0.004662	2.33	0.129379	1.98197	166.123	497.3	8.3
M166T524	349210	254228	64.89	366957	366816	57.3	0.95	-0.07	1	0	1	0.157185	166.036	524.1	8.7
M166T799	3.86481e+06	3.83518e+06	13.77	2.66532e+06	2.8112e+06	28.99	1.45	0.54	0.004662	2.33	0.129379	1.97533	165.983	798.9	13.3
M166T83	5.77509e+06	5.64099e+06	8.57	6.39525e+06	6.36849e+06	17.12	0.9	-0.15	0.328205	0.48	0.69011	1.08843	165.988	83	1.4
M166T89	2.97086e+07	2.88722e+07	9.01	3.32217e+07	3.06245e+07	20.04	0.89	-0.16	0.278632	0.55	0.649698	1.00447	166.053	89.4	1.5
M167T113	1.14381e+06	1.11103e+06	11.91	1163331	1.14576e+06	9.29	0.98	-0.02	0.720901	0.14	0.912378	0.338162	167.118	113.2	1.9
M167T116	1.70894e+07	1.67718e+07	34.91	1.12869e+07	8.65268e+06	69.28	1.51	0.6	0.0498834	1.3	0.330421	1.37082	167.093	116.3	1.9
M167T34	1.11698e+07	1.08893e+07	13.07	1.16373e+07	1.13834e+07	10.27	0.96	-0.06	0.382284	0.42	0.730096	0.595922	166.98	33.7	0.6
M167T565	2.13493e+06	1.87164e+06	40.71	1.93814e+06	2.12697e+06	40.47	1.1	0.14	0.95913	0.02	0.990641	0.431212	167.055	565.4	9.4
M167T604	1.23454e+06	1.0524e+06	43.84	1.16816e+06	975988	47.07	1.06	0.08	0.505361	0.3	0.809141	0.230062	167.107	603.7	10.1
M167T62	1.53136e+07	1.62932e+07	31.14	1.43982e+07	1.45013e+07	35.79	1.06	0.09	0.441803	0.35	0.769616	0.198815	166.98	62.4	1
M167T623	2.18185e+06	2.21675e+06	34.7	2.28819e+06	2.27136e+06	34.92	0.95	-0.07	1	0	1	0.224632	167.107	623.5	10.4
M167T677	2.20883e+06	2.1427e+06	17.69	2.21591e+06	2.25387e+06	27.85	1	0	0.878477	0.06	0.967431	0.159598	167.07	677.5	11.3
M167T72	3.90515e+07	3.95787e+07	10.45	3.98824e+07	3.88178e+07	19.15	0.98	-0.03	0.878477	0.06	0.967431	0.0592128	167.013	72.1	1.2
M167T762	2.74607e+06	2.85841e+06	28.17	2.73291e+06	2.43123e+06	35.13	1	0.01	1	0	1	0.0871213	167.012	762.1	12.7
M167T823	6.46851e+07	4.77006e+07	60.52	9.55804e+07	9.53147e+07	51.36	0.68	-0.56	0.130381	0.88	0.480121	1.17897	167.07	823.2	13.7
M167T89	3.41657e+06	3.75772e+06	47.89	7.41278e+06	2.3112e+06	135.87	0.46	-1.12	0.798446	0.1	0.941385	0.229384	167.056	89.3	1.5
M167T99	656987	673161	40.68	1.06247e+06	1.01701e+06	45.53	0.62	-0.69	0.0649573	1.19	0.368412	1.20828	167.081	98.9	1.6
M168T105	8.28946e+06	7.84604e+06	36.42	1.00632e+07	1.00701e+07	16.63	0.82	-0.28	0.234499	0.63	0.606344	1.03387	168.033	105.1	1.8
M168T130	45949051	5.02002e+07	31.33	5.3459e+07	5.46041e+07	20.07	0.86	-0.22	0.382284	0.42	0.730096	0.868016	167.977	130	2.2
M168T152	9.62634e+07	8.07239e+07	31.01	9.791e+07	9.43119e+07	33.45	0.98	-0.02	0.878477	0.06	0.967431	0.0569236	167.977	152.4	2.5
M168T163	1.57749e+07	1.44199e+07	31.41	1.71249e+07	1.76231e+07	30.01	0.92	-0.12	0.798446	0.1	0.941385	0.44728	167.975	163.2	2.7
M168T194	2.39146e+07	2.4137e+07	11.3	3.72919e+07	3.36413e+07	34.83	0.64	-0.64	0.0379176	1.42	0.297283	1.79136	167.975	194.5	3.2
M168T231	2.75838e+07	2.94447e+07	43.86	4.30972e+07	4.44491e+07	67.8	0.64	-0.64	0.234499	0.63	0.606344	0.46487	167.975	231.1	3.9
M168T250	1.19705e+07	9.49627e+06	46.3	1.61364e+07	1.5098e+07	29.48	0.74	-0.43	0.0829837	1.08	0.403171	1.32678	167.975	249.8	4.2
M168T290	1.96449e+08	2.04377e+08	16.21	1.50924e+08	1.31795e+08	51.79	1.3	0.38	0.0498834	1.3	0.330421	1.33654	167.975	289.7	4.8
M168T302	465106	389687	58.56	526186	514137	54.81	0.88	-0.18	0.441803	0.35	0.769616	0.212055	168.123	302.2	5
M168T339	1.65947e+07	1.71156e+07	30.09	1.62678e+07	1.46302e+07	48	1.02	0.03	0.573737	0.24	0.846615	0.28638	168.091	338.6	5.6
M168T35	1.78551e+08	8.78376e+07	98	1.80916e+08	8.26648e+07	103.44	0.99	-0.02	0.645377	0.19	0.878848	0.03908	167.976	34.9	0.6
M168T406	1.55652e+07	1.68198e+07	34.47	1.68474e+07	1.62103e+07	20.19	0.92	-0.11	0.878477	0.06	0.967431	0.570782	167.979	405.9	6.8
M168T463	7.19396e+06	5.89624e+06	34.45	8.07077e+06	8.81113e+06	40.49	0.89	-0.17	0.441803	0.35	0.769616	0.112654	167.979	462.9	7.7
M168T472	83816379	2.78112e+07	97.75	1.65192e+07	1.09051e+07	61.62	5.07	2.34	0.0379176	1.42	0.297283	1.93119	167.975	472.2	7.9
M168T490	4.69529e+06	4.77829e+06	34.95	5.67766e+06	5.92457e+06	31.68	0.83	-0.27	0.278632	0.55	0.649698	0.850028	167.979	490.1	8.2
M168T523	1.89345e+06	2030.86	164.89	1.90534e+06	128705	172.2	0.99	-0.01	0.505361	0.3	0.809141	0.380355	167.977	523.2	8.7
M168T530	7.20678e+06	6.83312e+06	31.72	6.04876e+06	5.25997e+06	36.92	1.19	0.25	0.234499	0.63	0.606344	0.909742	168.102	530.1	8.8
M168T540	1.88142e+07	1.64791e+07	74.17	1.16404e+07	7.37483e+06	75.44	1.62	0.69	0.328205	0.48	0.69011	0.99202	167.975	539.8	9
M168T557	8.17911e+06	7.86847e+06	46.59	6.42079e+06	6.20137e+06	41.7	1.27	0.35	0.441803	0.35	0.769616	0.690787	167.975	556.8	9.3
M168T618	4.17691e+06	3.64481e+06	33.06	3.11926e+06	3.22735e+06	32.08	1.34	0.42	0.278632	0.55	0.649698	1.30141	167.975	618.1	10.3
M168T62	1.25478e+08	1.25236e+08	10.4	1.24177e+08	1.2714e+08	7.36	1.01	0.02	0.878477	0.06	0.967431	0.149441	167.976	62	1
M168T635	3.13774e+06	2.64454e+06	49.59	3.0871e+06	3.32529e+06	36.7	1.02	0.02	0.878477	0.06	0.967431	0.0359585	167.975	634.9	10.6
M168T690	1.33689e+06	1.35145e+06	51.54	1.70716e+06	1.6432e+06	42.08	0.78	-0.35	0.505361	0.3	0.809141	0.888161	167.975	689.9	11.5
M168T72_1	2.06855e+06	2.06368e+06	6.42	1.8734e+06	2.12683e+06	29.73	1.1	0.14	0.798446	0.1	0.941385	0.810637	167.988	71.8	1.2
M168T72_2	9.1077e+06	9.27977e+06	5.13	9.9636e+06	9.44019e+06	16.79	0.91	-0.13	0.382284	0.42	0.730096	0.972371	168.05	71.7	1.2
M168T720	3.29747e+06	3.46537e+06	13.9	2.58652e+06	2.40697e+06	56.85	1.27	0.35	0.160528	0.79	0.521677	1.21611	167.975	720.3	12
M168T751	8.33187e+06	8.66353e+06	23.95	5.5971e+06	5.78195e+06	57.29	1.49	0.57	0.0649573	1.19	0.368412	1.49413	167.999	751	12.5
M168T77	1.82678e+06	1.75375e+06	79.62	2.62791e+06	2.67071e+06	49.03	0.7	-0.52	0.194872	0.71	0.56435	1.0936	168.077	76.7	1.3
M168T786	5.69804e+06	5.51754e+06	34.28	6.22407e+06	6.81189e+06	27.97	0.92	-0.13	0.798446	0.1	0.941385	0.460308	167.999	785.8	13.1
M168T807	5.25076e+06	5.79229e+06	30.2	5.19033e+06	4.78492e+06	64.55	1.01	0.02	0.878477	0.06	0.967431	0.437147	167.998	806.5	13.4
M168T823	2.72215e+06	2.76635e+06	33.49	4.11536e+06	3.97231e+06	52.09	0.66	-0.6	0.382284	0.42	0.730096	0.975298	168.074	823.1	13.7
M168T92	7.61047e+06	8.86755e+06	60.54	5.87829e+06	2.77637e+06	81.1	1.29	0.37	0.798446	0.1	0.941385	0.0398045	168.044	91.5	1.5
M169T100	1.36484e+06	1.35955e+06	20.53	1.72605e+06	1.33289e+06	41.93	0.79	-0.34	0.505361	0.3	0.809141	0.905748	168.99	99.8	1.7
M169T115	4.44007e+06	4.21846e+06	17.52	4.4367e+06	4.44999e+06	22.88	1	0	0.95913	0.02	0.990641	0.140754	168.961	114.5	1.9
M169T122_1	1.0317e+07	5.13371e+06	103.57	1.27728e+07	1.21464e+07	47.81	0.81	-0.31	0.278632	0.55	0.649698	0.864818	169.035	121.5	2
M169T122_2	5.96446e+06	4.91208e+06	36.33	5.66027e+06	5.59383e+06	48.6	1.05	0.08	0.878477	0.06	0.967431	0.428332	169.061	121.6	2
M169T126	2.55446e+06	1.75408e+06	76.47	4.69482e+06	5.03416e+06	55.81	0.54	-0.88	0.104895	0.98	0.440144	1.08335	168.981	125.7	2.1
M169T137_1	7.53682e+06	7.54846e+06	20.6	8.25941e+06	7.44182e+06	32.43	0.91	-0.13	0.878477	0.06	0.967431	0.397562	168.982	137	2.3
M169T137_2	3.73857e+06	4.09473e+06	49.17	7.90537e+06	7.89126e+06	37.81	0.47	-1.08	0.004662	2.33	0.129379	1.75971	169.036	136.9	2.3
M169T326	1.7166e+07	2.18664e+07	57.87	1.67165e+07	2.17148e+07	58.83	1.03	0.04	0.505361	0.3	0.809141	0.15291	169.061	326	5.4
M169T350	2.22855e+07	2.2995e+07	18.86	1.017e+07	9.41292e+06	76.74	2.19	1.13	0.0029526	2.53	0.116769	1.87315	169.097	349.6	5.8
M169T359	954319	907761	15.35	1.24264e+06	1.1888e+06	48.09	0.77	-0.38	0.278632	0.55	0.649698	0.396923	169.061	359.5	6
M169T36	4.56561e+06	4.34192e+06	35.64	3.07415e+06	2.73704e+06	27.02	1.49	0.57	0.0281274	1.55	0.261699	1.5625	168.976	35.8	0.6
M169T380	1.53663e+06	1.56556e+06	12.39	2.0594e+06	1.8649e+06	39.96	0.75	-0.42	0.160528	0.79	0.521677	1.18297	169.049	379.7	6.3
M169T417	339835	318530	40.2	406949	379951	44.69	0.84	-0.26	0.328205	0.48	0.69011	0.381604	169.061	416.8	6.9
M169T464	1.05645e+06	1.0235e+06	31.4	307592	336375	62	3.43	1.78	0.0001554	3.81	0.0532196	2.34999	169.076	464	7.7
M169T526	127946	62080.3	117.48	6.37341e+06	69630.4	273.98	0.02	-5.64	0.573737	0.24	0.846615	0.758488	169.133	526.1	8.8
M169T530	586820	547346	24.15	509914	501281	24.14	1.15	0.2	0.328205	0.48	0.69011	0.952786	169.105	530.1	8.8
M169T62	5172369	1.439e+06	107.25	3.59005e+06	4.06652e+06	55.07	1.44	0.53	0.645377	0.19	0.878848	0.0111255	168.977	62.3	1
M169T666	8.22729e+06	8.49788e+06	17.06	7.29315e+06	5.88598e+06	38.8	1.13	0.17	0.441803	0.35	0.769616	0.885792	169.061	665.8	11.1
M169T72	1.73043e+07	1.73319e+07	2.75	1.64085e+07	1.63839e+07	4.59	1.05	0.08	0.0206682	1.68	0.228643	1.74068	169.046	71.7	1.2
M169T78	1.73944e+08	1.88891e+08	35.87	2.07778e+08	2.01435e+08	17.13	0.84	-0.26	0.234499	0.63	0.606344	0.983041	169.095	77.6	1.3
M170T101	1.95739e+06	1.95144e+06	6.71	2.19015e+06	2.22955e+06	14.47	0.89	-0.16	0.194872	0.71	0.56435	1.29428	170.081	100.8	1.7
M170T106	5.49321e+06	1.88208e+06	105.43	8.97109e+06	6.371e+06	105.47	0.61	-0.71	0.382284	0.42	0.730096	0.720748	170.094	106.4	1.8
M170T122	1.72202e+07	1.65832e+07	14.04	1.59798e+07	1.58976e+07	8.02	1.08	0.11	0.573737	0.24	0.846615	0.89704	170.065	121.9	2
M170T173	1.65105e+06	1.79525e+06	30.2	1.5739e+06	1.56042e+06	19.37	1.05	0.07	0.720901	0.14	0.912378	0.16755	170.065	172.6	2.9
M170T33	1.28915e+07	1.03702e+07	40.41	9.00442e+06	8.71864e+06	27.09	1.43	0.52	0.160528	0.79	0.521677	1.28339	169.974	33.5	0.6
M170T350	786247	769017	16.88	738573	798315	23.36	1.06	0.09	0.720901	0.14	0.912378	0.573695	170.104	349.6	5.8
M170T357	1.32118e+06	1.22633e+06	42.18	699958	648158	45.66	1.89	0.92	0.0281274	1.55	0.261699	1.64177	169.543	356.5	5.9
M170T387	1.067e+06	1.32938e+06	62.05	1.2708e+06	866248	84.06	0.84	-0.25	0.720901	0.14	0.912378	0.0786939	170.081	386.8	6.4
M170T397	5.07005e+06	5.01301e+06	23.64	4.92293e+06	4.70181e+06	27.52	1.03	0.04	0.720901	0.14	0.912378	0.244054	170.06	397.2	6.6
M170T485	1.00539e+07	9.7149e+06	13.54	1.45116e+07	1.35664e+07	41.2	0.69	-0.53	0.382284	0.42	0.730096	1.34003	170.118	484.9	8.1
M170T565	377266	420761	40.33	355125	323029	27.41	1.06	0.09	0.878477	0.06	0.967431	0.0979772	169.52	565.1	9.4
M170T592	238058	208754	41.65	191687	179791	28.36	1.24	0.31	0.505361	0.3	0.809141	0.800298	170.154	592.5	9.9
M170T666	611579	612068	11.7	424775	464608	28.78	1.44	0.53	0.0010878	2.96	0.0833774	1.88813	170.064	665.9	11.1
M170T699	1.18692e+06	810967	87.83	836522	688127	64.05	1.42	0.5	0.645377	0.19	0.878848	0.520552	170.117	698.8	11.6
M170T73	1.41573e+06	1.33687e+06	49.71	2.55432e+06	1.34836e+06	130.24	0.55	-0.85	0.878477	0.06	0.967431	0.75527	169.96	73.2	1.2
M170T811	3.14642e+06	3.26528e+06	31.52	3.03832e+06	3.02443e+06	35.53	1.04	0.05	0.573737	0.24	0.846615	0.285911	170.056	810.7	13.5
M170T824	3.16064e+07	3.44431e+07	36.63	3.45703e+07	3.13474e+07	43.67	0.91	-0.13	0.878477	0.06	0.967431	0.121621	170.096	823.6	13.7
M170T94	2.21128e+07	1.84912e+07	34.78	2.42415e+07	1.94488e+07	59.55	0.91	-0.13	0.878477	0.06	0.967431	0.0321621	170.032	94.4	1.6
M171T101	1.17935e+07	9.4562e+06	71.28	1.31245e+07	1.31071e+07	36.18	0.9	-0.15	0.798446	0.1	0.941385	0.580247	171.076	101.4	1.7
M171T108	1.25324e+06	1.18853e+06	29.17	1.88811e+06	1.73665e+06	38.96	0.66	-0.59	0.0829837	1.08	0.403171	1.46222	171.113	108.4	1.8
M171T124	6.97684e+07	7.34364e+07	29.32	15033343	5.45293e+06	115.3	4.64	2.21	0.0003108	3.51	0.0568482	2.24014	171.149	124.4	2.1
M171T137	53235119	5.00905e+07	22.86	7.58887e+07	7.42161e+07	19.58	0.7	-0.51	0.0029526	2.53	0.116769	2.03819	170.977	136.9	2.3
M171T356	1.24542e+06	1.19884e+06	50.91	1.30975e+06	812728	74.99	0.95	-0.07	1	0	1	0.242186	170.562	356.5	5.9
M171T511	1.38289e+06	1.53011e+06	34.19	1.05591e+06	1.04691e+06	44.94	1.31	0.39	0.194872	0.71	0.56435	1.0536	171.101	510.8	8.5
M171T616	2.87878e+07	2.76366e+07	31.45	2.53446e+07	2.61251e+07	33.31	1.14	0.18	0.720901	0.14	0.912378	0.669424	171.149	616.2	10.3
M171T62	2.79877e+06	2.90042e+06	31	1.8122e+06	1.55057e+06	59.56	1.54	0.63	0.0829837	1.08	0.403171	1.52447	170.973	62.4	1
M171T629	2.83364e+06	2.62807e+06	43.54	2.67312e+06	2.55993e+06	33.32	1.06	0.08	0.95913	0.02	0.990641	0.028769	171.102	628.6	10.5
M171T65	2.5748e+07	2.48577e+07	20.28	2.87382e+07	2.72413e+07	31.38	0.9	-0.16	0.505361	0.3	0.809141	0.439335	171.148	65.3	1.1
M171T684	2.36973e+06	2.42179e+06	10.19	2.19332e+06	2.37031e+06	22.87	1.08	0.11	0.645377	0.19	0.878848	0.776767	171.138	683.9	11.4
M171T72	3.74168e+06	3.5944e+06	25.73	3.73179e+06	3.87345e+06	19.59	1	0	1	0	1	0.108893	171.043	71.8	1.2
M171T773	3.93077e+06	4.41033e+06	41.03	3.00249e+06	2.80059e+06	46.68	1.31	0.39	0.234499	0.63	0.606344	0.945126	171.138	773.3	12.9
M171T78	7.89058e+06	7.85396e+06	15.53	8.24603e+06	8.3536e+06	24.69	0.96	-0.06	0.573737	0.24	0.846615	0.211058	171.1	77.9	1.3
M171T84	7.97256e+06	9.21205e+06	34.01	5.91592e+06	7.09979e+06	59.17	1.35	0.43	0.160528	0.79	0.521677	1.00357	171.017	83.5	1.4
M172T100	1.42102e+06	1.44861e+06	11.9	1.80455e+06	1.72603e+06	30.77	0.79	-0.34	0.194872	0.71	0.56435	1.24461	172.072	99.6	1.7
M172T116	4.34242e+07	4.46576e+07	13.84	3.3524e+07	3.53138e+07	22.53	1.3	0.37	0.00699301	2.16	0.14968	1.73223	172.097	116	1.9
M172T126_1	1.38751e+06	830233	81.27	1.31369e+06	1.05105e+06	67.73	1.06	0.08	0.878477	0.06	0.967431	0.101171	171.977	125.9	2.1
M172T126_2	1.30087e+06	1322638	41.67	1.82051e+06	1.58089e+06	33.35	0.71	-0.48	0.130381	0.88	0.480121	1.11646	172.153	125.6	2.1
M172T137	2.34088e+06	2.40735e+06	26.79	3.6114e+06	3.82249e+06	37.92	0.65	-0.63	0.0498834	1.3	0.330421	1.42565	171.977	136.9	2.3
M172T174	271195	331783	52.73	320776	329022	46.14	0.85	-0.24	0.798446	0.1	0.941385	0.610511	171.534	173.7	2.9
M172T314	4.32724e+06	4.43183e+06	10.51	4.35643e+06	4.48569e+06	14.07	0.99	-0.01	0.798446	0.1	0.941385	0.0540168	172.06	313.9	5.2
M172T33	1.86959e+06	1.78047e+06	12.64	1.98616e+06	2.04825e+06	13.32	0.94	-0.09	0.328205	0.48	0.69011	0.736924	171.994	32.6	0.5
M172T343	5.60285e+06	5.63998e+06	46.07	3.53651e+06	2.44248e+06	75.46	1.58	0.66	0.130381	0.88	0.480121	1.32248	172.097	343.3	5.7
M172T436	1.0111e+06	960555	76.29	1.1243e+06	996617	74.92	0.9	-0.15	0.798446	0.1	0.941385	0.374885	172.097	435.7	7.3
M172T486	1.1389e+06	915450	56.11	1.39164e+06	1.50474e+06	56.2	0.82	-0.29	0.720901	0.14	0.912378	0.406234	172.043	485.6	8.1
M172T517	6.34389e+07	2.81335e+07	110.56	8.23056e+07	1.27543e+07	153.48	0.77	-0.38	0.573737	0.24	0.846615	0.40437	172.133	516.5	8.6
M172T616	2.36188e+06	2.26057e+06	19.37	2.49201e+06	2.2876e+06	34.87	0.95	-0.08	0.95913	0.02	0.990641	0.0481129	172.153	616.2	10.3
M172T633	400006	254235	94.8	447864	303504	87.72	0.89	-0.16	0.441803	0.35	0.769616	0.283077	172.169	632.8	10.5
M172T635	454338	460325	31.7	267143	113419	123.29	1.7	0.77	0.0829837	1.08	0.403171	1.60697	172.133	635.1	10.6
M172T66	7.42423e+06	7.47346e+06	7.65	8.08972e+06	7.99728e+06	11.46	0.92	-0.12	0.234499	0.63	0.606344	1.23736	171.993	66.4	1.1
M172T706	357486	398227	40.88	450370	508016	37.72	0.79	-0.33	0.234499	0.63	0.606344	0.708083	172.206	705.7	11.8
M172T714	2.08356e+06	1.9628e+06	37.3	2.03118e+06	1.8886e+06	27.61	1.03	0.04	0.720901	0.14	0.912378	0.0306721	172.133	714.2	11.9
M172T725	1.03959e+06	1.08771e+06	40.11	657433	615313	47.95	1.58	0.66	0.104895	0.98	0.440144	1.29067	172.17	724.6	12.1
M172T73	579487	586096	11.01	702680	729897	22.9	0.82	-0.28	0.0829837	1.08	0.403171	1.26167	171.959	73.1	1.2
M172T780	1.68157e+07	7.06856e+06	108.81	1.72378e+07	1.71363e+07	61.73	0.98	-0.04	0.505361	0.3	0.809141	0.512126	172.17	779.6	13
M172T815	1.00005e+07	1.02688e+07	43.24	5.91847e+06	5.30407e+06	77.97	1.69	0.76	0.0649573	1.19	0.368412	1.25892	172.115	815.5	13.6
M172T83	2.89675e+06	2.84589e+06	16.25	2.21786e+06	1.97272e+06	32.63	1.31	0.39	0.0649573	1.19	0.368412	1.61953	172.058	82.9	1.4
M173T112	670966	630578	26.22	661697	579842	45.59	1.01	0.02	0.95913	0.02	0.990641	0.3672	173.129	111.6	1.9
M173T121	1.83729e+06	1.92254e+06	46.42	1.94554e+06	1.68288e+06	28.86	0.94	-0.08	0.798446	0.1	0.941385	0.415814	173.092	121	2
M173T137	4.09412e+06	3.91503e+06	10.82	4.43077e+06	4.48803e+06	10.54	0.92	-0.11	0.234499	0.63	0.606344	1.06309	172.974	136.8	2.3
M173T33	3.22769e+06	1.91055e+06	119.47	7.28231e+06	2.03954e+06	110.52	0.44	-1.17	0.328205	0.48	0.69011	0.972713	172.977	32.6	0.5
M173T366	270972	259239	20.46	209045	200668	23.48	1.3	0.37	0.0498834	1.3	0.330421	1.69158	173.092	365.5	6.1
M173T517_1	3.39505e+06	3.70327e+06	34.49	4.08025e+06	3.89599e+06	35.88	0.83	-0.27	0.441803	0.35	0.769616	0.719418	173.117	516.8	8.6
M173T517_2	5.13414e+06	5.44546e+06	34.48	3.77472e+06	3.94263e+06	31.23	1.36	0.44	0.160528	0.79	0.521677	1.25708	173.137	516.5	8.6
M173T554	1.98069e+06	1.83993e+06	15.53	1.80512e+06	1.82189e+06	25.9	1.1	0.13	0.505361	0.3	0.809141	0.819512	173.085	553.9	9.2
M173T558	592728	563786	49.68	593062	550494	42.53	1	0	0.798446	0.1	0.941385	0.112559	173.071	558.2	9.3
M173T599	70439.1	64064.5	50.42	82620.8	68256	40.08	0.85	-0.23	0.278632	0.55	0.649698	0.755085	173.141	598.6	10
M173T780	1.71013e+06	1.61142e+06	44.82	1.43777e+06	1.33149e+06	30.84	1.19	0.25	0.645377	0.19	0.878848	0.455075	173.173	779.6	13
M173T87	2.40197e+06	2.39513e+06	10.41	2.22514e+06	2.17329e+06	35.06	1.08	0.11	0.720901	0.14	0.912378	0.686946	173.042	87	1.4
M173T89	1.82228e+06	1.61606e+06	30.17	4.46984e+06	3.96179e+06	54.7	0.41	-1.29	0.0029526	2.53	0.116769	2.09331	173.021	89.1	1.5
M174T115	2.3648e+06	2539774	24.67	2.20289e+06	2.62395e+06	50.44	1.07	0.1	0.573737	0.24	0.846615	0.66945	174.076	114.9	1.9
M174T356	1.06754e+06	1.04927e+06	21.79	1.33531e+06	1.25584e+06	23.52	0.8	-0.32	0.130381	0.88	0.480121	1.29613	174.113	356.4	5.9
M174T418	1.33141e+06	1.36495e+06	28.25	1.19194e+06	1.08551e+06	46.7	1.12	0.16	0.328205	0.48	0.69011	0.717934	174.058	418	7
M174T450	1.10106e+06	1.05363e+06	28.61	1.36084e+06	1.1601e+06	61.52	0.81	-0.31	0.878477	0.06	0.967431	0.29308	174.055	449.6	7.5
M174T454	115556	107802	79.63	95621.1	64460.7	105.29	1.21	0.27	0.573737	0.24	0.846615	0.353301	174.002	454	7.6
M174T492	352994	373867	48.34	289098	260745	71.26	1.22	0.29	0.505361	0.3	0.809141	0.695232	174.149	492.3	8.2
M174T500	5.98534e+06	7.49094e+06	53.75	1.92979e+06	1.18376e+06	111.35	3.1	1.63	0.0281274	1.55	0.261699	1.55112	174.113	500.2	8.3
M174T539	2.54969e+06	2.6977e+06	35.43	1.92546e+06	1.90051e+06	30.87	1.32	0.41	0.104895	0.98	0.440144	1.03992	174.185	538.6	9
M174T565	442159	373804	36.86	377485	333171	67.81	1.17	0.23	0.328205	0.48	0.69011	0.817021	174.059	565	9.4
M174T578	4.21391e+06	4.16229e+06	31.69	3.6798e+06	3.4624e+06	33.97	1.15	0.2	0.441803	0.35	0.769616	0.685376	174.185	577.7	9.6
M174T72	2.69045e+06	2.90012e+06	32.54	3.00316e+06	2.9842e+06	23.81	0.9	-0.16	0.720901	0.14	0.912378	0.714435	174.025	71.8	1.2
M174T75	565202	617138	28.49	462456	426340	29.97	1.22	0.29	0.194872	0.71	0.56435	0.923588	174.069	75.2	1.3
M174T824	9.01107e+06	3983901	110.42	3.53285e+06	3.17032e+06	62.67	2.55	1.35	0.441803	0.35	0.769616	0.930379	174.128	824.3	13.7
M174T98	2.40027e+06	2.42616e+06	47.36	1.57107e+06	1.75411e+06	77.06	1.53	0.61	0.160528	0.79	0.521677	1.06505	174.076	98.2	1.6
M175T102	2.55583e+06	1.94987e+06	91.46	3.36108e+06	2.73433e+06	70.72	0.76	-0.4	0.441803	0.35	0.769616	0.762704	174.972	102.1	1.7
M175T103_1	1.63626e+07	1.59839e+07	12.05	1.5871e+07	1.61236e+07	13.82	1.03	0.04	0.573737	0.24	0.846615	0.340761	175.071	103.4	1.7
M175T103_2	2.08773e+07	2.04958e+07	8.59	2.28582e+07	2.26004e+07	14.88	0.91	-0.13	0.441803	0.35	0.769616	1.08645	175.108	103.4	1.7
M175T113	2.80305e+07	1.76709e+07	88.87	1.18075e+07	1.26779e+07	54.04	2.37	1.25	0.0829837	1.08	0.403171	1.55025	175.071	112.7	1.9
M175T122	3.95597e+06	4.33292e+06	36.59	4.0397e+06	3.82337e+06	20.43	0.98	-0.03	0.645377	0.19	0.878848	0.513907	175.053	122.3	2
M175T280	2.62692e+06	2.36607e+06	20.76	2.81474e+06	2.68731e+06	16.85	0.93	-0.1	0.328205	0.48	0.69011	0.63698	174.534	280.1	4.7
M175T350	583754	614687	21.6	409105	414091	33.98	1.43	0.51	0.014763	1.83	0.200021	1.5897	175.06	349.9	5.8
M175T387	390863	305307	94.06	954082	944142	40.14	0.41	-1.29	0.014763	1.83	0.200021	1.78002	175.06	386.6	6.4
M175T396	630604	618507	32.77	684611	657923	24.49	0.92	-0.12	0.720901	0.14	0.912378	0.603943	175.087	396	6.6
M175T441	2.76106e+06	2.8328e+06	30.83	2.47872e+06	2.49158e+06	18.67	1.11	0.16	0.130381	0.88	0.480121	0.29398	175.079	440.5	7.3
M175T447	93850.2	96711.4	60.29	126271	120523	49.85	0.74	-0.43	0.382284	0.42	0.730096	0.937023	175.03	446.8	7.4
M175T578	249400	225796	74.88	200090	150959	91.46	1.25	0.32	0.441803	0.35	0.769616	0.361166	175.189	577.9	9.6
M175T65	1.15107e+06	1.12243e+06	23.62	1.6348e+06	1.73536e+06	24.61	0.7	-0.51	0.0379176	1.42	0.297283	1.69688	175.09	65	1.1
M175T652	882434	515023	108.11	424204	386434	64.24	2.08	1.06	0.645377	0.19	0.878848	0.626953	175.096	652.1	10.9
M175T744	3.03583e+07	3.24266e+07	31.49	2.76833e+07	2.72013e+07	35.92	1.1	0.13	0.720901	0.14	0.912378	0.414344	175.148	744.2	12.4
M175T758	6.54915e+06	5.79751e+06	42.33	4.14112e+06	3.64049e+06	50.9	1.58	0.66	0.0498834	1.3	0.330421	1.55395	175.112	757.6	12.6
M175T80	6.01499e+07	6.09545e+07	11.51	6.81252e+07	6.49464e+07	19.23	0.88	-0.18	0.194872	0.71	0.56435	1.04503	174.938	80.1	1.3
M175T82	1.9709e+07	1.5459e+07	75.74	1.67336e+07	1.31636e+07	41.12	1.18	0.24	0.95913	0.02	0.990641	0.206947	174.896	82.3	1.4
M175T83_1	4.17893e+08	3.69189e+08	35.31	3.87135e+08	3.53399e+08	25.98	1.08	0.11	0.645377	0.19	0.878848	0.370165	175.119	83.2	1.4
M175T83_2	5.19542e+06	5.18034e+06	4.06	5.57108e+06	5.55317e+06	5.87	0.93	-0.1	0.0206682	1.68	0.228643	1.85652	175.144	82.8	1.4
M176T103	7.14123e+06	7.75422e+06	26.93	1.74327e+06	1.72265e+06	83.44	4.1	2.03	0.000621601	3.21	0.069967	2.23131	176.111	103.4	1.7
M176T104	924675	1.01727e+06	24.12	1.02364e+06	1.05031e+06	30.36	0.9	-0.15	0.505361	0.3	0.809141	0.375046	176.075	103.6	1.7
M176T105	1.64331e+06	1.73522e+06	25.97	2.52745e+06	2.5746e+06	44.74	0.65	-0.62	0.194872	0.71	0.56435	1.1956	176.165	105.1	1.8
M176T106	1.30977e+07	1.21535e+07	33.88	9.4743e+06	1.11635e+07	58.66	1.38	0.47	0.328205	0.48	0.69011	1.05086	176.092	106.5	1.8
M176T110	6.08489e+06	3.26358e+06	86.85	6.46708e+06	3.6348e+06	88.59	0.94	-0.09	0.798446	0.1	0.941385	0.152618	176.128	110.4	1.8
M176T112	122994	47510.3	179.35	922836	885286	60.29	0.13	-2.91	0.014763	1.83	0.200021	1.87274	176.075	112.4	1.9
M176T115	554565	254837	129.91	614631	219363	112.38	0.9	-0.15	0.328205	0.48	0.69011	0.106638	176.092	115.2	1.9
M176T116	2.5762e+06	2.45439e+06	14.5	1.35329e+06	1.26051e+06	62.69	1.9	0.93	0.00699301	2.16	0.14968	1.92438	176.038	116.4	1.9
M176T121	7.05599e+06	7.45985e+06	37.21	7.53938e+06	8.48201e+06	33.88	0.94	-0.1	0.95913	0.02	0.990641	0.17524	176.128	121.4	2
M176T192	2.39408e+06	2.25919e+06	30.81	5.50357e+06	5.51049e+06	41.16	0.44	-1.2	0.0104118	1.98	0.169968	2.0198	176.037	192.2	3.2
M176T219	6.90728e+06	6.83375e+06	13.49	6.89532e+06	7.62638e+06	40.89	1	0	0.645377	0.19	0.878848	0.362073	176.037	219.4	3.7
M176T351	125944	132371	49.44	123841	128360	42.89	1.02	0.02	1	0	1	0.134436	176.118	350.8	5.8
M176T375	4.91556e+06	5.0869e+06	18.81	3.91747e+06	4.09842e+06	29.12	1.25	0.33	0.104895	0.98	0.440144	1.28473	176.037	375	6.2
M176T376	638237	649558	26.24	561015	542457	21.26	1.14	0.19	0.328205	0.48	0.69011	0.751815	176.107	376.3	6.3
M176T441	226575	239157	38.35	240530	248515	26.72	0.94	-0.09	0.878477	0.06	0.967431	0.464169	176.082	440.5	7.3
M176T479	173737	167780	82.32	361741	130753	178.1	0.48	-1.06	0.878477	0.06	0.967431	0.314921	176.128	479.3	8
M176T534	727777	737190	41.78	747634	790743	36.11	0.97	-0.04	1	0	1	0.173775	176.071	534.1	8.9
M176T727	1.22941e+06	1.1385e+06	22.21	952190	1.03012e+06	22.31	1.29	0.37	0.104895	0.98	0.440144	1.52214	176.107	726.9	12.1
M176T744	1.86022e+06	1.61521e+06	41.75	2.01061e+06	2.01848e+06	28.41	0.93	-0.11	0.573737	0.24	0.846615	0.485636	176.151	744.1	12.4
M176T80	1.2524e+06	1.46535e+06	41.42	1.44029e+06	1.43922e+06	31.08	0.87	-0.2	0.720901	0.14	0.912378	0.686059	175.941	80	1.3
M176T83	5.24202e+07	6.12861e+07	37.86	4.77604e+07	4.4256e+07	44.02	1.1	0.13	0.573737	0.24	0.846615	0.299809	176.122	83.2	1.4
M176T89	1.53253e+08	1.50218e+08	15.02	8.7657e+07	9.29385e+07	44.89	1.75	0.81	0.0010878	2.96	0.0833774	1.83818	176.103	88.9	1.5
M176T98	1.65936e+06	1.61324e+06	27.87	1.59363e+06	1.59306e+06	15.85	1.04	0.06	0.878477	0.06	0.967431	0.152294	176.037	98.3	1.6
M177T100	2.49534e+06	2.5811e+06	22.64	1.27611e+06	1.08592e+06	73.75	1.96	0.97	0.0206682	1.68	0.228643	1.78475	177.065	100	1.7
M177T107	221412	219571	19.68	243201	254206	38.55	0.91	-0.14	0.645377	0.19	0.878848	0.17436	177.095	106.7	1.8
M177T110	1.08461e+06	813554	49.48	900168	660676	55.75	1.2	0.27	0.104895	0.98	0.440144	0.680151	177.132	110.4	1.8
M177T113_1	372210	330501	60.03	857872	634922	75.24	0.43	-1.2	0.104895	0.98	0.440144	1.43175	177.022	112.5	1.9
M177T113_2	618366	676155	43.57	512839	277572	72.52	1.21	0.27	0.328205	0.48	0.69011	0.706286	177.039	112.6	1.9
M177T115	534008	338310	67.84	613857	455617	77.23	0.87	-0.2	1	0	1	0.180244	176.998	114.5	1.9
M177T310	1.29178e+06	1.0021e+06	54	2.21073e+06	2.33299e+06	74.66	0.58	-0.78	0.278632	0.55	0.649698	0.145647	177.102	309.5	5.2
M177T328	5.32905e+06	5.58594e+06	10.23	4.2108e+06	4.06444e+06	25	1.27	0.34	0.0379176	1.42	0.297283	1.77681	177.106	327.7	5.5
M177T33	1.00775e+07	9.94176e+06	5.9	1.08985e+07	1.02196e+07	21.06	0.92	-0.11	0.878477	0.06	0.967431	0.677878	176.971	32.8	0.5
M177T353	1.5156e+06	1.51982e+06	11.87	1.5073e+06	1.43422e+06	25.68	1.01	0.01	0.573737	0.24	0.846615	0.255973	177.112	353.4	5.9
M177T595	1.68148e+06	1.79753e+06	49.27	984684	1.08558e+06	44.53	1.71	0.77	0.0498834	1.3	0.330421	1.22505	177.127	595.5	9.9
M177T62	7.44221e+06	7536985	7.3	8.45151e+06	7.81066e+06	18.36	0.88	-0.18	0.328205	0.48	0.69011	1.21057	176.971	62.2	1
M177T621	6.53456e+06	4.52355e+06	54.98	6.68663e+06	6.89706e+06	39.47	0.98	-0.03	0.798446	0.1	0.941385	0.239618	177.127	621.4	10.4
M177T65	1.80571e+06	2.36782e+06	54.85	2.40598e+06	2.44734e+06	21.27	0.75	-0.41	0.278632	0.55	0.649698	1.16553	177.014	64.8	1.1
M177T751	3.0236e+06	2.27053e+06	55.78	2.30096e+06	2.32548e+06	62.15	1.31	0.39	0.441803	0.35	0.769616	0.832094	177.164	750.8	12.5
M177T78	1.77108e+06	1.74531e+06	11.94	1.87016e+06	1.80843e+06	8.83	0.95	-0.08	0.234499	0.63	0.606344	0.822557	177.061	77.9	1.3
M177T781	7.4402e+06	5.32294e+06	66.13	8.92342e+06	8.76296e+06	38.68	0.83	-0.26	0.505361	0.3	0.809141	0.792994	177.127	781.2	13
M177T785	2.00482e+06	1.49014e+06	82.34	1.88281e+06	1.6198e+06	58.67	1.06	0.09	0.878477	0.06	0.967431	0.385839	177.055	784.8	13.1
M177T80	3.86166e+06	3.79999e+06	6.54	4.20347e+06	4.13323e+06	12.04	0.92	-0.12	0.194872	0.71	0.56435	1.19797	176.936	80.1	1.3
M177T89	8.84255e+06	9.01945e+06	7.39	7.6811e+06	8.27159e+06	22.55	1.15	0.2	0.160528	0.79	0.521677	1.20481	177.106	89	1.5
M177T91	1.53793e+06	1.52115e+06	8.29	1.56499e+06	1.54286e+06	6.93	0.98	-0.03	0.645377	0.19	0.878848	0.436402	177.087	91.3	1.5
M178T105	1.36895e+06	1.51284e+06	43.03	1.94107e+06	1.94127e+06	37.69	0.71	-0.5	0.130381	0.88	0.480121	1.18997	178.053	104.7	1.7
M178T107	1.48389e+06	1.59502e+06	32.69	1.28805e+06	1.36488e+06	40.09	1.15	0.2	0.505361	0.3	0.809141	0.706822	178.085	106.7	1.8
M178T348	405535	381554	22.44	377917	368213	30.92	1.07	0.1	0.645377	0.19	0.878848	0.480611	178.053	348.3	5.8
M178T403	1.37244e+07	1.56057e+07	36.81	2.08883e+07	1.40892e+07	59.08	0.66	-0.61	0.505361	0.3	0.809141	1.00868	178.134	402.7	6.7
M178T428	1.20324e+06	1.19527e+06	12.38	1.02235e+06	996255	21.8	1.18	0.24	0.0498834	1.3	0.330421	1.48236	178.086	427.8	7.1
M178T619	1.90209e+06	1.86143e+06	19.41	1.41255e+06	1.38083e+06	19.32	1.35	0.43	0.0104118	1.98	0.169968	1.92037	178.036	618.7	10.3
M178T621	757657	582612	66.68	568457	604269	33.58	1.33	0.41	0.878477	0.06	0.967431	0.335394	178.131	621.4	10.4
M178T635	955582	921787	14.99	792545	834199	29.98	1.21	0.27	0.234499	0.63	0.606344	1.28877	178.159	634.8	10.6
M178T667	702681	666421	56.28	1.16525e+06	966427	68.88	0.6	-0.73	0.194872	0.71	0.56435	1.00474	178.099	667.2	11.1
M178T671	1.12704e+06	1.10934e+06	41.85	749742	634064	44.69	1.5	0.59	0.0649573	1.19	0.368412	1.37598	178.123	671	11.2
M178T769	4.64518e+06	4.78178e+06	35.71	4.34448e+06	4.26738e+06	26.74	1.07	0.1	0.720901	0.14	0.912378	0.180438	178.123	768.6	12.8
M178T781	565746	504415	35.61	427946	377022	34.64	1.32	0.4	0.104895	0.98	0.440144	1.18087	178.131	781.1	13
M178T81	2.44912e+07	2.45009e+07	6.56	2.58424e+07	2.46008e+07	11.56	0.95	-0.08	0.441803	0.35	0.769616	0.850613	178.058	80.7	1.3
M178T90	4.06792e+06	4.36216e+06	14.28	4.2238e+06	4.17577e+06	15.69	0.96	-0.05	0.878477	0.06	0.967431	0.369015	178.071	89.5	1.5
M179T116	250735	235453	23.05	233044	219397	22.41	1.08	0.11	0.798446	0.1	0.941385	0.481505	179.082	115.6	1.9
M179T346	667456	414527	106.87	619425	358646	117.73	1.08	0.11	0.104895	0.98	0.440144	0.327141	179.082	345.7	5.8
M179T356	1.79736e+06	1.98623e+06	47.92	2.84715e+06	2.25628e+06	76.87	0.63	-0.66	0.328205	0.48	0.69011	0.871355	178.549	356.5	5.9
M179T403	1.72234e+06	1.44039e+06	45.67	1.98791e+06	1.51443e+06	83.61	0.87	-0.21	0.878477	0.06	0.967431	0.30531	179.137	402.7	6.7
M179T415	467692	484673	57	375641	306177	73.51	1.25	0.32	0.645377	0.19	0.878848	0.62763	179.154	415.2	6.9
M179T472	6.9416e+06	4.94818e+06	59.79	6.82102e+06	6.94307e+06	44.94	1.02	0.03	1	0	1	0.175989	179.092	472.2	7.9
M179T544	4.80023e+06	3.61475e+06	46.56	4.79275e+06	3.93968e+06	59.87	1	0	0.798446	0.1	0.941385	0.179347	179.063	543.8	9.1
M179T576	1.18703e+06	975775	40.37	1.20681e+06	1.10403e+06	27.79	0.98	-0.02	0.441803	0.35	0.769616	0.270327	179.118	575.9	9.6
M179T700	3454402	2.92711e+06	51.21	2.91943e+06	2.48458e+06	69.89	1.18	0.24	0.645377	0.19	0.878848	0.727795	179.143	700.1	11.7
M179T707	1.87299e+06	2.01372e+06	41.62	2.42675e+06	2.43462e+06	55.75	0.77	-0.37	0.441803	0.35	0.769616	0.449767	179.107	707.4	11.8
M179T72	1.9083e+06	2.52351e+06	68.56	4.10142e+06	3.49288e+06	65.65	0.47	-1.1	0.0829837	1.08	0.403171	1.07385	179.496	71.8	1.2
M179T767	7.13018e+06	6.46835e+06	41.88	4.04901e+06	2.6594e+06	86.85	1.76	0.82	0.0649573	1.19	0.368412	1.67979	179.107	767.4	12.8
M179T794	3.83112e+07	4.50712e+07	39.9	2.96524e+07	2.96181e+07	23.77	1.29	0.37	0.278632	0.55	0.649698	0.734728	179.107	794.1	13.2
M179T83	8.02672e+06	8.12748e+06	16.39	7.50563e+06	7.89255e+06	15.17	1.07	0.1	0.441803	0.35	0.769616	0.667048	179.09	82.7	1.4
M179T92	3.98237e+07	4.07467e+07	11.46	2.13383e+07	1.88278e+07	87.29	1.87	0.9	0.0498834	1.3	0.330421	1.72935	179.129	92	1.5
M179T96	3.05529e+07	2.91249e+07	35.84	2.33416e+07	2.46431e+07	49.91	1.31	0.39	0.328205	0.48	0.69011	1.03049	179.129	96.5	1.6
M180T107	1.09873e+06	1.09331e+06	50.02	822207	551556	91.84	1.34	0.42	0.194872	0.71	0.56435	0.904085	180.069	107.4	1.8
M180T114	1.66786e+06	1.79023e+06	39.59	1.54911e+06	1.72878e+06	43.47	1.08	0.11	0.878477	0.06	0.967431	0.365301	180.069	113.6	1.9
M180T126	728902	693155	22.36	682274	660379	30.78	1.07	0.1	0.720901	0.14	0.912378	0.462474	180.102	125.8	2.1
M180T323	2.86975e+06	3.30352e+06	44.49	2.32921e+06	2.5366e+06	40.19	1.23	0.3	0.160528	0.79	0.521677	0.383518	180.065	323	5.4
M180T353	3.52708e+06	3.48468e+06	38.66	3.32903e+06	3.06528e+06	35.74	1.06	0.08	0.720901	0.14	0.912378	0.169941	180.088	353.3	5.9
M180T373	1.30843e+06	51052.4	180.04	1.25718e+06	29180	181.17	1.04	0.06	0.234499	0.63	0.606344	0.160611	180.066	373.3	6.2
M180T537	3.48628e+06	3.16204e+06	29.75	3.20153e+06	3.20155e+06	24.74	1.09	0.12	0.878477	0.06	0.967431	0.551819	180.102	537.2	9
M180T575	624661	644038	39.24	484247	441023	35.94	1.29	0.37	0.382284	0.42	0.730096	0.807622	180.16	574.6	9.6
M180T667	387066	390453	61.61	611277	556059	51.12	0.63	-0.66	0.160528	0.79	0.521677	1.27855	180.097	667.2	11.1
M180T690	1.51645e+06	1.59105e+06	35.67	1.99245e+06	1.97782e+06	28.88	0.76	-0.39	0.0829837	1.08	0.403171	0.981581	180.175	689.9	11.5
M180T71	1.57862e+06	1.59901e+06	6.24	1.51423e+06	1.49466e+06	5.14	1.04	0.06	0.234499	0.63	0.606344	1.14932	179.997	71.4	1.2
M180T72	765211	738401	47.58	800011	763248	48.08	0.96	-0.06	0.645377	0.19	0.878848	0.0978751	180.495	71.8	1.2
M180T794	3.91146e+06	4124656	29.28	3.2221e+06	2.98592e+06	26.25	1.21	0.28	0.160528	0.79	0.521677	0.788156	180.11	794.1	13.2
M180T813	177246	159170	28.69	160838	115507	54.22	1.1	0.14	0.194872	0.71	0.56435	0.68371	180.138	813.2	13.6
M180T83	5.10316e+06	4.95556e+06	24.41	4.56447e+06	4.27631e+06	13.11	1.12	0.16	0.328205	0.48	0.69011	0.635215	179.982	83.2	1.4
M180T92	3.53313e+06	3.64361e+06	28.63	2.99837e+06	2.92115e+06	30.86	1.18	0.24	0.160528	0.79	0.521677	0.639368	179.63	91.6	1.5
M180T99	5.02189e+06	4.72521e+06	19.3	4.4732e+06	4.35217e+06	18.07	1.12	0.17	0.328205	0.48	0.69011	0.979882	179.63	98.5	1.6
M181T115_1	332387	145877	98.84	1.02654e+06	1.07982e+06	52.24	0.32	-1.63	0.00699301	2.16	0.14968	2.04638	181.036	114.9	1.9
M181T115_2	288194	238545	35.05	410102	365424	32.43	0.7	-0.51	0.0498834	1.3	0.330421	1.51215	181.053	115	1.9
M181T319	1.01159e+06	955946	84.29	2.37081e+06	2.16093e+06	81.54	0.43	-1.23	0.130381	0.88	0.480121	0.679551	181.064	319.5	5.3
M181T455	605526	494531	53.94	490706	500864	41.15	1.23	0.3	0.798446	0.1	0.941385	0.662436	181.05	454.8	7.6
M181T461	1.1339e+07	1.28082e+07	49.51	6.03215e+06	4.36131e+06	88.87	1.88	0.91	0.104895	0.98	0.440144	1.16701	181.097	460.5	7.7
M181T544	278326	220844	67.29	190671	159209	43.85	1.46	0.55	0.505361	0.3	0.809141	0.668487	181.06	543.8	9.1
M181T611	1.29234e+06	1.19848e+06	47.58	746069	765843	69.81	1.73	0.79	0.104895	0.98	0.440144	1.32796	181.122	611.5	10.2
M181T626	784941	698807	38.35	673502	633955	22.68	1.17	0.22	0.505361	0.3	0.809141	0.720838	181.086	626.4	10.4
M181T655	896152	1.05407e+06	46.27	1.53199e+06	1.18152e+06	71.73	0.58	-0.77	0.328205	0.48	0.69011	0.918126	181.159	655.4	10.9
M181T686	569742	511916	39.98	659434	749632	33.9	0.86	-0.21	0.382284	0.42	0.730096	0.666583	181.086	686.1	11.4
M181T69	1.35508e+06	1.4029e+06	21.71	1.17879e+06	1.23851e+06	39.53	1.15	0.2	0.505361	0.3	0.809141	0.759935	180.99	68.9	1.1
M181T690	685302	773760	50.38	936184	917003	30.91	0.73	-0.45	0.104895	0.98	0.440144	1.10232	181.159	689.9	11.5
M181T70	1.03622e+06	1.03062e+06	8.98	1.07869e+06	1.11229e+06	8.45	0.96	-0.06	0.505361	0.3	0.809141	0.727514	180.621	70	1.2
M181T752	4.35902e+06	4.44692e+06	31.47	6.00132e+06	6.04008e+06	11.18	0.73	-0.46	0.00699301	2.16	0.14968	1.68372	181.122	752.4	12.5
M181T770	3.47691e+06	3.8195e+06	50.36	4.13597e+06	4.10966e+06	26.44	0.84	-0.25	0.328205	0.48	0.69011	0.892727	181.159	770.5	12.8
M182T122	7.31107e+06	6.92927e+06	26.16	8.53379e+06	8.54562e+06	34.99	0.86	-0.22	0.505361	0.3	0.809141	0.529743	182.104	121.6	2
M182T124	7.60533e+08	7.88594e+08	14.35	9.60123e+08	9.33783e+08	16.41	0.79	-0.34	0.0206682	1.68	0.228643	1.80627	182.081	124.3	2.1
M182T140	5.51658e+08	5.58843e+08	10.99	4.67557e+08	5.18797e+08	40.19	1.18	0.24	0.505361	0.3	0.809141	0.888537	182.081	139.6	2.3
M182T145	1.21081e+07	1.29919e+07	32.25	1.20644e+07	1.49642e+07	52.67	1	0.01	0.573737	0.24	0.846615	0.40897	182.104	144.6	2.4
M182T191	2.39626e+08	2.61478e+08	33.43	2.67675e+08	2.3663e+08	32.96	0.9	-0.16	0.798446	0.1	0.941385	0.434738	182.081	190.9	3.2
M182T291	2.74277e+06	2.72158e+06	19.66	2.60741e+06	2.63046e+06	16.15	1.05	0.07	0.720901	0.14	0.912378	0.433298	182.103	291.2	4.9
M182T327	5.03915e+06	4.26834e+06	31.27	1.00065e+07	1.00307e+07	24.1	0.5	-0.99	0.0010878	2.96	0.0833774	2.39947	182.081	327.5	5.5
M182T360	116410	118293	11.45	113323	115223	10.91	1.03	0.04	0.505361	0.3	0.809141	0.343228	182.139	359.8	6
M182T460	409709	28837.1	176.88	305341	26792	173.81	1.34	0.42	0.798446	0.1	0.941385	0.120568	182.105	460.4	7.7
M182T565	1.97342e+06	1.86365e+06	36.16	2.1513e+06	2.0516e+06	39.52	0.92	-0.12	0.878477	0.06	0.967431	0.311441	182.048	565.1	9.4
M182T597	2.29173e+07	2.39542e+07	20.16	2.41557e+07	2.22745e+07	20.47	0.95	-0.08	0.95913	0.02	0.990641	0.340875	182.118	596.7	9.9
M182T64_2	6.83255e+06	5.87745e+06	64.07	6.37333e+06	4.9835e+06	46.96	1.07	0.1	0.798446	0.1	0.941385	0.0507685	182.028	63.7	1.1
M182T720	1.94864e+06	1.88904e+06	48.54	1.12867e+06	890513	59.94	1.73	0.79	0.0649573	1.19	0.368412	1.49255	182.118	720.4	12
M182T804	1.42719e+06	1.35978e+06	40.57	1.41645e+06	1.12466e+06	59.66	1.01	0.01	0.878477	0.06	0.967431	0.301622	182.009	804.4	13.4
M182T83	8.1669e+06	7.92383e+06	27.41	9.2118e+06	8.82427e+06	32.25	0.89	-0.17	0.798446	0.1	0.941385	0.613193	181.961	82.9	1.4
M182T92	3.05511e+07	3.0926e+07	14.43	3.93317e+07	3.63789e+07	26.05	0.78	-0.36	0.130381	0.88	0.480121	1.47007	182.048	92.1	1.5
M183T105	2.93628e+06	2.83484e+06	59.96	2.05577e+06	2.00546e+06	26.42	1.43	0.51	0.328205	0.48	0.69011	0.566496	183.113	105.4	1.8
M183T124	5.384e+07	5.22089e+07	20.26	6.00889e+07	5.39608e+07	30.9	0.9	-0.16	0.441803	0.35	0.769616	0.557569	183.084	124.4	2.1
M183T134	3.31013e+07	3.2165e+07	9.56	1.80597e+07	1.66438e+07	55.11	1.83	0.87	0.004662	2.33	0.129379	2.07765	182.985	133.6	2.2
M183T140	1.93992e+07	1.58282e+07	43.91	6.08296e+07	6.20536e+07	35.96	0.32	-1.65	0.0003108	3.51	0.0568482	2.46171	183.083	139.6	2.3
M183T191	3.11295e+07	3.17884e+07	13.66	3.21026e+07	2.71178e+07	27.48	0.97	-0.04	0.645377	0.19	0.878848	0.048849	183.084	191	3.2
M183T203	3.40761e+06	3.54556e+06	16.42	3.52229e+06	3.51495e+06	9.71	0.97	-0.05	0.798446	0.1	0.941385	0.487633	182.997	203	3.4
M183T37	3.04506e+07	2.71241e+07	45.2	3.26037e+07	2.40186e+07	63.44	0.93	-0.1	1	0	1	0.129173	182.985	36.8	0.6
M183T400	2.18805e+06	2.23898e+06	24.56	2.17378e+06	1.80832e+06	43.08	1.01	0.01	0.95913	0.02	0.990641	0.247504	183.021	399.5	6.7
M183T538	5.82692e+06	5.38903e+06	29.68	4.72203e+06	4.17781e+06	37.96	1.23	0.3	0.0649573	1.19	0.368412	1.11051	183.194	538.3	9
M183T565	269562	263093	25.15	261772	249134	22.23	1.03	0.04	0.645377	0.19	0.878848	0.131879	182.549	565.1	9.4
M183T590	407336	376662	26.58	452446	426998	27.23	0.9	-0.15	0.441803	0.35	0.769616	0.523296	183.149	590.3	9.8
M183T597	2.08552e+06	1.63523e+06	58.7	3.51106e+06	3.68564e+06	63.33	0.59	-0.75	0.328205	0.48	0.69011	1.04521	183.121	596.7	9.9
M183T604	1.92503e+07	1.90809e+07	58.3	1.22316e+07	1.12156e+07	53.13	1.57	0.65	0.234499	0.63	0.606344	1.02507	183.078	603.5	10.1
M183T648	3.06863e+06	2.69091e+06	53.9	2.47145e+06	2.19985e+06	40.35	1.24	0.31	0.441803	0.35	0.769616	0.593796	183.138	647.5	10.8
M183T69	6.94446e+07	6.43132e+07	66.12	7.50052e+07	7.94055e+07	44.55	0.93	-0.11	0.878477	0.06	0.967431	0.324734	182.987	68.7	1.1
M183T72	6.18278e+06	6.43202e+06	10.09	4.67144e+06	4.56248e+06	7.31	1.32	0.4	0.000621601	3.21	0.069967	2.57838	182.962	71.6	1.2
M183T730	2.1749e+06	2.02535e+06	47.38	2.9305e+06	2.10028e+06	69.12	0.74	-0.43	0.505361	0.3	0.809141	0.522663	183.102	730.1	12.2
M183T744	1.33807e+06	1.21168e+06	23.47	1.42735e+06	1.47917e+06	7.76	0.94	-0.09	0.234499	0.63	0.606344	0.847263	183.174	744.3	12.4
M183T75	733451	718558	19	255998	308034	85.91	2.87	1.52	0.0003108	3.51	0.0568482	1.82939	182.527	75.3	1.3
M183T762	3.13265e+08	3.1866e+08	33.29	4.07742e+08	3.47672e+08	78.44	0.77	-0.38	0.573737	0.24	0.846615	0.239367	182.987	762.5	12.7
M183T77	574498	548066	14.42	589673	580676	11.6	0.97	-0.04	0.441803	0.35	0.769616	0.346768	183.11	77.1	1.3
M183T772	1.71443e+08	1.43028e+08	89.07	1.65846e+08	1.34652e+08	57.75	1.03	0.05	0.798446	0.1	0.941385	0.418655	182.986	771.5	12.9
M183T809	1.10603e+08	1.07979e+08	42.55	1.41663e+08	1.36665e+08	36.76	0.78	-0.36	0.328205	0.48	0.69011	0.877069	182.986	808.6	13.5
M183T811	3.0782e+07	3.07109e+07	37.32	2.78583e+07	2.81371e+07	45.87	1.1	0.14	0.382284	0.42	0.730096	0.391173	183.08	810.9	13.5
M183T82	8.8014e+06	8.52992e+06	9.58	6.53151e+06	6.65589e+06	10.36	1.35	0.43	0.0001554	3.81	0.0532196	2.53854	182.902	81.9	1.4
M183T92	1.61296e+06	1.6298e+06	4.66	1.74279e+06	1.65775e+06	18.29	0.93	-0.11	0.573737	0.24	0.846615	0.797493	183.051	91.9	1.5
M183T98	2.34148e+06	1.68473e+06	79.26	2.14628e+06	2.50183e+06	57.8	1.09	0.13	1	0	1	0.0798769	182.977	97.7	1.6
M184T105	640250	541414	61.05	1.34832e+06	1.19219e+06	57.44	0.47	-1.07	0.0498834	1.3	0.330421	1.56474	183.543	104.5	1.7
M184T107	3.05858e+06	2.56592e+06	39.82	2.36725e+06	1.87362e+06	44.15	1.29	0.37	0.160528	0.79	0.521677	1.02728	184.027	107.4	1.8
M184T114	892620	877105	18.29	722523	747530	26.73	1.24	0.31	0.104895	0.98	0.440144	1.22949	183.969	114.2	1.9
M184T125	5.184e+06	4.59846e+06	45.16	6.23122e+06	6.23912e+06	18.11	0.83	-0.27	0.160528	0.79	0.521677	1.11785	184.085	124.7	2.1
M184T140	698878	494650	102.5	921452	659524	64.32	0.76	-0.4	0.234499	0.63	0.606344	1.06669	184.086	140.1	2.3
M184T191	823959	787124	58.21	1.27338e+06	1.44102e+06	48.9	0.65	-0.63	0.0829837	1.08	0.403171	0.909982	184.085	191.4	3.2
M184T203	1.12802e+06	1.30144e+06	39.5	2.96371e+06	2.91806e+06	60.73	0.38	-1.39	0.0829837	1.08	0.403171	1.76133	183.996	203	3.4
M184T291	2.73976e+06	2.59739e+06	25.43	1.72661e+06	1.76557e+06	25.35	1.59	0.67	0.0018648	2.73	0.096514	2.08031	184.06	291.4	4.9
M184T346	787045	701454	62.35	950778	910620	36.16	0.83	-0.27	0.278632	0.55	0.649698	0.976812	184.108	346.3	5.8
M184T356	1.21951e+07	1.24184e+07	19.39	6.91419e+06	7.62126e+06	42.11	1.76	0.82	0.0018648	2.73	0.096514	1.95295	184.097	356.4	5.9
M184T362	6.75569e+06	6.52118e+06	23.95	1.05215e+07	9.07632e+06	39.31	0.64	-0.64	0.0104118	1.98	0.169968	1.85133	184.17	362.4	6
M184T380	982379	973787	35.97	1.15552e+06	1.13843e+06	12.41	0.85	-0.23	0.328205	0.48	0.69011	1.0993	184.06	380.2	6.3
M184T416	346940	317551	25.31	427747	435474	37.29	0.81	-0.3	0.160528	0.79	0.521677	0.49424	184.17	416.4	6.9
M184T465	2.10853e+06	1.62816e+06	78.32	2.75379e+06	2.68576e+06	39	0.77	-0.39	0.160528	0.79	0.521677	1.116	184.06	465	7.8
M184T538	146102	154078	48.3	108093	113143	62.57	1.35	0.43	0.234499	0.63	0.606344	0.854612	184.197	538.2	9
M184T540	948674	940820	47.32	827141	664053	83.65	1.15	0.2	0.382284	0.42	0.730096	0.774936	184.133	540.1	9
M184T606	946160	979971	27.77	862870	796889	24.92	1.1	0.13	0.328205	0.48	0.69011	0.38029	184.206	605.8	10.1
M184T644	1.15103e+06	1.20134e+06	58.18	2.16858e+06	2.0162e+06	49.8	0.53	-0.91	0.0829837	1.08	0.403171	1.51607	184.133	643.8	10.7
M184T72	511321	593506	35.05	1.12836e+06	1.30157e+06	39.75	0.45	-1.14	0.0281274	1.55	0.261699	1.7434	183.963	71.7	1.2
M184T777	960728	913575	44.43	2092437	1.95183e+06	41.76	0.46	-1.12	0.004662	2.33	0.129379	1.96738	184.17	777.4	13
M184T807	1.7985e+07	1.75705e+07	33.93	1.50094e+07	1.52733e+07	31.05	1.2	0.26	0.328205	0.48	0.69011	0.699827	184.112	807.4	13.5
M184T808	906542	798179	51.29	849475	837685	42.21	1.07	0.09	0.95913	0.02	0.990641	0.223117	184.133	808.1	13.5
M184T811	4.455e+06	4.46241e+06	34.61	3.54446e+06	3.5562e+06	37.15	1.26	0.33	0.278632	0.55	0.649698	0.949088	184.084	811	13.5
M184T824	2.21654e+07	2.39961e+07	35.11	2.51021e+07	2.29156e+07	46.18	0.88	-0.18	0.95913	0.02	0.990641	0.28931	184.075	823.5	13.7
M184T92	417408	385425	22.31	324025	327469	21.48	1.29	0.37	0.0649573	1.19	0.368412	1.62947	184.044	91.8	1.5
M185T100	1.93256e+07	1.68579e+07	54.7	8.08062e+06	8.20058e+06	34.47	2.39	1.26	0.0104118	1.98	0.169968	1.68581	185.129	100.2	1.7
M185T102	777940	700302	21.78	630155	625375	36.03	1.23	0.3	0.234499	0.63	0.606344	1.13472	184.956	102	1.7
M185T110	1.67128e+06	1.83401e+06	59.01	1.75943e+06	1.88974e+06	43.58	0.95	-0.07	0.95913	0.02	0.990641	0.103693	184.577	110.5	1.8
M185T111	3.4086e+06	3.35518e+06	25.63	4.76065e+06	4.54563e+06	25.88	0.72	-0.48	0.0379176	1.42	0.297283	1.7092	185.092	110.8	1.8
M185T129	1.33077e+07	1.54109e+07	55.25	8.84472e+06	5.7532e+06	91.39	1.5	0.59	0.194872	0.71	0.56435	1.11105	184.992	128.5	2.1
M185T179	3.50412e+07	3.18211e+07	26.87	3.9495e+07	3.45447e+07	42.05	0.89	-0.17	0.878477	0.06	0.967431	0.312515	184.993	179	3
M185T226	5.87341e+06	6.03329e+06	33.81	4.99283e+06	4.94019e+06	32.73	1.18	0.23	0.382284	0.42	0.730096	0.619633	184.993	225.8	3.8
M185T257	2.62457e+06	2.61209e+06	19.85	2.42758e+06	2.37271e+06	13.97	1.08	0.11	0.505361	0.3	0.809141	0.649583	184.992	257.3	4.3
M185T356	352207	358921	17.19	712479	651967	62.23	0.49	-1.02	0.0649573	1.19	0.368412	1.56487	185.1	356.5	5.9
M185T362	654682	591147	49.42	1.19307e+06	805694	113.97	0.55	-0.87	0.441803	0.35	0.769616	0.771885	185.173	362.4	6
M185T372	3.17917e+06	2.86545e+06	40.85	1.70981e+06	1.79282e+06	35.32	1.86	0.89	0.0206682	1.68	0.228643	1.91617	185.129	371.8	6.2
M185T391	352088	352817	17.14	362353	378845	24.74	0.97	-0.04	0.278632	0.55	0.649698	0.00811817	184.618	391.4	6.5
M185T429	73837.1	66896.4	45.18	81433.5	62631.7	83.02	0.91	-0.14	1	0	1	0.405496	185.068	429	7.2
M185T575	856323	833212	34.96	1.22034e+06	1.15464e+06	23.24	0.7	-0.51	0.0498834	1.3	0.330421	1.64312	185.115	574.6	9.6
M185T624	914956	824290	36.66	758746	698488	66.47	1.21	0.27	0.328205	0.48	0.69011	0.897185	185.117	623.7	10.4
M185T709	1.2492e+06	1.21346e+06	44.26	1.14818e+06	1.37007e+06	34.4	1.09	0.12	0.878477	0.06	0.967431	0.176609	185.165	709.3	11.8
M185T72	2.16954e+06	1.83624e+06	55.42	2.3949e+06	2.51084e+06	45.52	0.91	-0.14	0.645377	0.19	0.878848	0.25752	184.961	71.6	1.2
M185T774	3.60294e+07	3.77589e+07	23.27	3.25125e+07	2.91571e+07	33.29	1.11	0.15	0.505361	0.3	0.809141	0.628658	184.988	774	12.9
M185T78	5.43168e+06	3.82305e+06	52.94	1.15186e+07	1.06025e+07	63.98	0.47	-1.08	0.130381	0.88	0.480121	1.37222	185.07	78	1.3
M185T79	3.74277e+06	3.72028e+06	7.17	3.74805e+06	3.85898e+06	10.46	1	0	0.798446	0.1	0.941385	0.0340175	185.115	78.6	1.3
M185T803	1.51806e+08	1.24567e+08	43.42	1.61119e+08	1.49772e+08	43.6	0.94	-0.09	0.720901	0.14	0.912378	0.0359084	184.986	803.2	13.4
M185T808	1.93551e+06	1.58027e+06	66.51	1.8594e+06	1.8139e+06	53.56	1.04	0.06	1	0	1	0.0196684	185.116	807.6	13.5
M185T84	2.0557e+07	2.24438e+07	41.21	2.2566e+07	2.02154e+07	55.39	0.91	-0.13	0.720901	0.14	0.912378	0.0250258	185.032	83.7	1.4
M185T85	2.36438e+07	2.49449e+07	19.89	3.22665e+07	3.0841e+07	18.72	0.73	-0.45	0.0104118	1.98	0.169968	1.88519	185.077	85	1.4
M186T102	8.48813e+06	8.2333e+06	10.8	8.85388e+06	8.93922e+06	14.41	0.96	-0.06	0.798446	0.1	0.941385	0.472497	186.106	102	1.7
M186T120	2.79321e+08	2.84917e+08	49.28	2.17157e+08	1.93617e+08	73.22	1.29	0.36	0.505361	0.3	0.809141	0.856188	186.087	120.1	2
M186T203	1.26043e+06	1.22075e+06	15.28	1.51532e+06	1.63235e+06	23.95	0.83	-0.27	0.130381	0.88	0.480121	1.16809	185.992	203	3.4
M186T364	1.99932e+07	2.23696e+07	27.93	1.90614e+07	1.86177e+07	45.42	1.05	0.07	0.720901	0.14	0.912378	0.340195	186.076	364.3	6.1
M186T369	1.96171e+06	1.82327e+06	38.91	1.78705e+06	1.64399e+06	44.83	1.1	0.13	0.505361	0.3	0.809141	0.491779	186.185	369	6.2
M186T468	648387	545826	70.94	629246	494722	78.39	1.03	0.04	0.95913	0.02	0.990641	0.160594	186.149	468.2	7.8
M186T503	1.98429e+06	1.9582e+06	29.37	2.31277e+06	1.98388e+06	59.86	0.86	-0.22	0.95913	0.02	0.990641	0.0398308	186.112	502.6	8.4
M186T513	3.81545e+06	3.8049e+06	37.72	3.66613e+06	3.65674e+06	21.59	1.04	0.06	1	0	1	0.0580972	186.112	513.4	8.6
M186T519	1.90134e+06	1.87968e+06	16.3	3.96701e+06	2.1397e+06	143.42	0.48	-1.06	0.278632	0.55	0.649698	0.571262	186.058	518.9	8.6
M186T538	2.81919e+06	2.46902e+06	46.52	2.57689e+06	2.23207e+06	46.45	1.09	0.13	0.645377	0.19	0.878848	0.403907	186.058	538.3	9
M186T548	712778	793831	22.32	699946	753951	30.77	1.02	0.03	0.798446	0.1	0.941385	0.215389	186.149	548.1	9.1
M186T585	2.3323e+06	2.29637e+06	40.61	1.89766e+06	1.93574e+06	36.18	1.23	0.3	0.328205	0.48	0.69011	0.785884	186.149	584.6	9.7
M186T614	9.55277e+07	9.73173e+07	37.65	6.85578e+07	7.19641e+07	49.14	1.39	0.48	0.130381	0.88	0.480121	1.1952	186.222	614.4	10.2
M186T621	2.29549e+06	2417829	37.99	2.20331e+06	1.95938e+06	57.45	1.04	0.06	0.720901	0.14	0.912378	0.391904	186.149	620.6	10.3
M186T635	1.56779e+06	1.61838e+06	17.14	1.66206e+06	1.87567e+06	31.49	0.94	-0.08	0.234499	0.63	0.606344	0.0673116	186.149	634.9	10.6
M186T645	1.53435e+06	1.70482e+06	30.3	1.38225e+06	1.38952e+06	30.63	1.11	0.15	0.645377	0.19	0.878848	0.505348	186.149	644.6	10.7
M186T72	1.47518e+06	1.60312e+06	36.16	1.24775e+06	1.11763e+06	47.9	1.18	0.24	0.328205	0.48	0.69011	0.646692	185.984	72.3	1.2
M186T734	341687	293822	52.21	331247	276948	66.48	1.03	0.04	0.798446	0.1	0.941385	0.360291	186.092	733.6	12.2
M186T750	1.61508e+07	1.7482e+07	40.11	1.26753e+07	1.20137e+07	51.25	1.27	0.35	0.278632	0.55	0.649698	0.784191	186.222	750.1	12.5
M186T757	2.16817e+06	1.88925e+06	37.37	1.3067e+06	1.22671e+06	38.33	1.66	0.73	0.0206682	1.68	0.228643	1.75467	185.985	757.1	12.6
M186T809	3.91548e+06	3.4904e+06	57.9	4.05167e+06	3.9296e+06	37.57	0.97	-0.05	0.505361	0.3	0.809141	0.357052	185.987	808.7	13.5
M186T812	3.70419e+06	3.10153e+06	43.67	2.3236e+06	2.18702e+06	43.67	1.59	0.67	0.0649573	1.19	0.368412	1.49185	186.185	811.9	13.5
M186T815	2.04533e+07	2.24185e+07	42.31	2.25313e+07	2.34783e+07	60.91	0.91	-0.14	0.798446	0.1	0.941385	0.0624511	186.221	814.6	13.6
M186T83_1	4.42559e+07	4.42935e+07	12.16	4.56302e+07	4.30024e+07	18.57	0.97	-0.04	0.878477	0.06	0.967431	0.22696	185.96	83.4	1.4
M186T91	940971	924462	15.76	1.20706e+06	1.17065e+06	22.44	0.78	-0.36	0.0498834	1.3	0.330421	1.60203	186.054	90.9	1.5
M186T98	2.44384e+07	2.15034e+07	24.57	1.8634e+07	1.89828e+07	21.97	1.31	0.39	0.0829837	1.08	0.403171	1.57374	186.076	98.1	1.6
M187T112	3.32648e+07	2.76237e+07	66.66	2.32142e+07	1.59994e+07	87.26	1.43	0.52	0.160528	0.79	0.521677	1.02425	187.108	112.5	1.9
M187T120	1.22248e+07	1.31816e+07	61.27	1.75689e+07	1.14206e+07	93.58	0.7	-0.52	0.441803	0.35	0.769616	0.420362	187.091	120	2
M187T325	935909	986207	31.05	1.54671e+06	1.54118e+06	42.82	0.61	-0.72	0.0649573	1.19	0.368412	1.44912	187.144	325.5	5.4
M187T35	28342826	2.8919e+07	9.54	2.65382e+07	2.61859e+07	18.28	1.07	0.09	0.505361	0.3	0.809141	0.829403	186.955	34.8	0.6
M187T364	928161	992810	16.98	724804	661814	68.27	1.28	0.36	0.382284	0.42	0.730096	1.21999	187.079	364.4	6.1
M187T523	1.37518e+06	1.2703e+06	21.21	1.3193e+06	1.3576e+06	26.07	1.04	0.06	0.505361	0.3	0.809141	0.319032	187.097	522.8	8.7
M187T548	1.06633e+06	1.08622e+06	39.59	1.26421e+06	1.33668e+06	25.03	0.84	-0.25	0.160528	0.79	0.521677	0.792384	187.097	548.3	9.1
M187T580	1.48733e+06	1.51858e+06	26.63	1.30103e+06	1.36764e+06	22.13	1.14	0.19	0.328205	0.48	0.69011	0.816798	187.144	579.5	9.7
M187T614	1.22974e+07	1.26528e+07	41.52	1.09736e+07	1.27335e+07	46.05	1.12	0.16	0.720901	0.14	0.912378	0.521947	187.225	614.4	10.2
M187T62	4.5917e+07	3.23911e+07	70.8	2.7146e+07	2.84873e+07	28.79	1.69	0.76	0.160528	0.79	0.521677	1.42255	186.955	62.3	1
M187T65	3.53389e+06	3.34833e+06	15.58	3.639e+06	3.63465e+06	8.71	0.97	-0.04	0.278632	0.55	0.649698	0.539193	187.126	65.1	1.1
M187T671	609737	636992	38.08	705742	674624	66.02	0.86	-0.21	0.95913	0.02	0.990641	0.0582991	187.157	671.3	11.2
M187T79	538726	529874	19.84	542849	519177	25.65	0.99	-0.01	0.878477	0.06	0.967431	0.0385726	187.07	78.5	1.3
M187T91	8.34397e+06	6.52838e+06	49.31	6.56576e+06	5.59647e+06	56.56	1.27	0.35	0.505361	0.3	0.809141	0.81384	187	90.6	1.5
M188T101	1.23611e+06	903314	97.23	1.20929e+06	1.03594e+06	56.98	1.02	0.03	0.645377	0.19	0.878848	0.719938	188.128	100.8	1.7
M188T103	366157	365632	73.85	231699	131750	91.14	1.58	0.66	0.234499	0.63	0.606344	0.92991	187.611	103.3	1.7
M188T105	3.23097e+06	2.34223e+06	56.58	5.44421e+06	4.41168e+06	55.44	0.59	-0.75	0.0498834	1.3	0.330421	1.48632	188.091	105.1	1.8
M188T113	1.2837e+06	1.25107e+06	4.69	1.31538e+06	1.3335e+06	3.7	0.98	-0.04	0.328205	0.48	0.69011	0.929828	188.111	112.6	1.9
M188T137	3.72549e+06	3.97026e+06	18.35	4.25636e+06	3.20907e+06	40.78	0.88	-0.19	0.95913	0.02	0.990641	0.34656	187.991	136.7	2.3
M188T139	592838	575078	37.02	970915	868415	50.85	0.61	-0.71	0.0829837	1.08	0.403171	1.38631	188.037	138.5	2.3
M188T312	6.28334e+06	6.31072e+06	19.81	7.69876e+06	7.64321e+06	22.28	0.82	-0.29	0.104895	0.98	0.440144	1.27969	188.128	312.4	5.2
M188T332	1.07676e+06	1.10163e+06	12.88	568265	551513	57.57	1.89	0.92	0.000621601	3.21	0.069967	1.99724	188.165	332.5	5.5
M188T397	6.7933e+08	7.6106e+08	37.69	5.76812e+08	5.23971e+08	39.62	1.18	0.24	0.505361	0.3	0.809141	0.478819	188.071	397.2	6.6
M188T458	444425	432379	13.28	457814	446604	14.94	0.97	-0.04	0.573737	0.24	0.846615	0.376637	188.074	458.2	7.6
M188T485	4.59148e+06	5.09471e+06	37.82	5.07715e+06	5.10328e+06	20.82	0.9	-0.15	0.645377	0.19	0.878848	0.684647	188.128	484.9	8.1
M188T514	139801	132399	26.55	124758	131030	31.72	1.12	0.16	0.573737	0.24	0.846615	0.644944	188.074	514.2	8.6
M188T549	984348	1.07359e+06	48.55	937421	823627	53.37	1.05	0.07	1	0	1	0.129567	188.164	549	9.2
M188T585	713510	411914	115.57	1.45665e+06	950426	103.38	0.49	-1.03	0.234499	0.63	0.606344	0.726977	188.165	584.7	9.7
M188T614	666962	606044	44.3	606123	583849	38.77	1.1	0.14	0.720901	0.14	0.912378	0.30854	188.228	614.5	10.2
M188T76	165646	151647	80.74	149667	159514	57.5	1.11	0.15	0.878477	0.06	0.967431	0.0903503	188.176	75.9	1.3
M188T803	1.03595e+07	1.12415e+07	36.65	1.20412e+07	1.23869e+07	18.16	0.86	-0.22	0.645377	0.19	0.878848	0.833771	188	802.9	13.4
M188T83_2	4.25251e+06	4.17398e+06	6.89	3.3475e+06	3.09555e+06	29.13	1.27	0.35	0.0829837	1.08	0.403171	1.65701	188.176	82.9	1.4
M188T92	799209	789695	8.76	841695	818735	9.95	0.95	-0.07	0.278632	0.55	0.649698	0.843716	188.115	91.7	1.5
M189T103	2.2087e+06	2.21827e+06	3.78	2.33667e+06	2.33384e+06	3.58	0.95	-0.08	0.0104118	1.98	0.169968	1.87953	189.123	102.7	1.7
M189T114	341746	357520	28.21	297977	262910	36.75	1.15	0.2	0.382284	0.42	0.730096	0.680114	188.948	114.4	1.9
M189T120	6.19771e+06	6.67903e+06	17.76	6.62183e+06	6.19932e+06	27.06	0.94	-0.1	0.95913	0.02	0.990641	0.395424	189.123	120.4	2
M189T125	2.23158e+07	2.20766e+07	12.17	2.03524e+07	1.8477e+07	16.96	1.1	0.13	0.104895	0.98	0.440144	1.02314	188.987	125.2	2.1
M189T137	4.91263e+07	4.19847e+07	84.49	5.40047e+07	3.79035e+07	87.95	0.91	-0.14	0.878477	0.06	0.967431	0.088344	188.987	137.1	2.3
M189T311	517946	524156	10.1	547416	546762	10.09	0.95	-0.08	0.382284	0.42	0.730096	0.82432	189.132	310.9	5.2
M189T366	6.92831e+06	6969076	27.62	3.90443e+06	4.05125e+06	43.38	1.77	0.83	0.00699301	2.16	0.14968	1.84037	189.123	366.3	6.1
M189T397	4.79736e+07	4.82404e+07	17.16	7.10059e+07	6.7111e+07	27.95	0.68	-0.57	0.0104118	1.98	0.169968	1.872	189.074	397.2	6.6
M189T485	363149	332423	49.64	425770	484089	31.18	0.85	-0.23	0.441803	0.35	0.769616	0.73971	189.131	484.9	8.1
M189T62	1.30225e+07	1.19913e+07	30.87	16635876	1.45364e+07	31.95	0.78	-0.35	0.014763	1.83	0.200021	1.32425	188.997	62	1
M189T665	882251	872403	29.7	794826	705557	43.39	1.11	0.15	0.505361	0.3	0.809141	0.600006	189.091	664.9	11.1
M189T749	689906	727780	38.27	638397	627398	32.99	1.08	0.11	0.573737	0.24	0.846615	0.20308	189.164	748.7	12.5
M189T82	8.94856e+07	8.84468e+07	12.19	1.10057e+08	1.0511e+08	18.45	0.81	-0.3	0.0206682	1.68	0.228643	1.67761	189.16	81.7	1.4
M189T85	4.56398e+06	2.40336e+06	74.61	4.42766e+06	3.50473e+06	55.97	1.03	0.04	0.573737	0.24	0.846615	0.211667	189.135	84.6	1.4
M190T105	487023	471393	22.44	416618	418352	16.05	1.17	0.23	0.328205	0.48	0.69011	1.0749	190.015	105	1.8
M190T106_1	561205	529299	14.61	634571	617794	19.64	0.88	-0.18	0.160528	0.79	0.521677	0.998045	190.082	105.6	1.8
M190T106_2	1.85056e+07	1.75416e+07	21.28	1.4238e+07	1.41646e+07	13.29	1.3	0.38	0.014763	1.83	0.200021	1.88847	190.144	106.2	1.8
M190T116	4.75028e+07	4.61506e+07	36.46	4.64258e+07	4.34643e+07	30.35	1.02	0.03	0.798446	0.1	0.941385	0.0218786	190.107	116	1.9
M190T137	2.71576e+06	2.79853e+06	36.58	1.91931e+06	1.40515e+06	52.78	1.41	0.5	0.104895	0.98	0.440144	1.21245	189.987	137.1	2.3
M190T261	2.14343e+06	2.10293e+06	17.22	2.0583e+06	2.09363e+06	14.1	1.04	0.06	0.720901	0.14	0.912378	0.330134	190.033	260.6	4.3
M190T315	1.3385e+06	1.34794e+06	19.38	1.1689e+06	1.24787e+06	22.27	1.15	0.2	0.278632	0.55	0.649698	0.994709	190.053	314.6	5.2
M190T366	310796	311638	38.75	412565	474133	56.45	0.75	-0.41	0.278632	0.55	0.649698	0.370062	190.127	366.4	6.1
M190T426	694038	686548	34.16	844182	752538	29.59	0.82	-0.28	0.382284	0.42	0.730096	1.02631	190.053	426.4	7.1
M190T441	1.53704e+06	991123	91.73	2.96878e+06	2.84108e+06	69.62	0.52	-0.95	0.160528	0.79	0.521677	1.17682	190.107	441	7.3
M190T454	236379	228173	12.15	247271	245483	14.78	0.96	-0.06	0.720901	0.14	0.912378	0.442409	190.097	454.4	7.6
M190T517	453502	370839	46.25	432843	392942	41.98	1.05	0.07	0.878477	0.06	0.967431	0.114773	189.671	516.5	8.6
M190T565	8.33244e+06	6.82699e+06	55.64	1.34815e+07	1.16657e+07	33.93	0.62	-0.69	0.104895	0.98	0.440144	1.44605	190.034	565.1	9.4
M190T566	1.62157e+06	1.25864e+06	66.3	1.42039e+06	1.37581e+06	54.16	1.14	0.19	0.720901	0.14	0.912378	0.199833	190.071	565.6	9.4
M190T63	7.82285e+06	9.21041e+06	36.88	7.72054e+06	7.45312e+06	61.43	1.01	0.02	0.95913	0.02	0.990641	0.383643	189.999	63	1
M190T651	492281	432891	66.75	381817	350882	31.83	1.29	0.37	0.573737	0.24	0.846615	0.102507	190.086	651.2	10.9
M190T701	2.25737e+06	1.79826e+06	38.56	1.97512e+06	1.82913e+06	33.19	1.14	0.19	0.645377	0.19	0.878848	0.566405	190.126	700.6	11.7
M190T87	1.63588e+06	1.95727e+06	46.22	2.13657e+06	2.50611e+06	50.07	0.77	-0.39	0.0649573	1.19	0.368412	0.428889	190.071	87.3	1.5
M190T99	4.45714e+06	3.94575e+06	39.04	4.02522e+06	4.01764e+06	19.11	1.11	0.15	0.878477	0.06	0.967431	0.240416	190.119	98.5	1.6
M191T100	580168	623248	53.06	805737	794348	46.32	0.72	-0.47	0.160528	0.79	0.521677	0.941222	191.103	100	1.7
M191T113	1.11216e+07	1.3011e+07	61.83	1.82887e+07	1.58357e+07	60.91	0.61	-0.72	0.328205	0.48	0.69011	0.963677	191.049	113.3	1.9
M191T114	1.65624e+06	1.6274e+06	16.16	1.38813e+06	1.17292e+06	50.85	1.19	0.25	0.278632	0.55	0.649698	0.97693	190.986	114.3	1.9
M191T116	3.67469e+06	3.41318e+06	45.04	4.12579e+06	3.58905e+06	34.69	0.89	-0.17	0.573737	0.24	0.846615	0.664122	191.111	116	1.9
M191T133	113018	106868	28.15	109251	107553	38.02	1.03	0.05	0.720901	0.14	0.912378	0.378626	191.055	132.9	2.2
M191T137	1.27079e+07	1.3586e+07	25.04	1.31373e+07	1.39983e+07	16.93	0.97	-0.05	0.720901	0.14	0.912378	0.288583	190.982	137.1	2.3
M191T316	1.72761e+07	1.77092e+07	22.21	1.6923e+07	1.74081e+07	15.33	1.02	0.03	0.798446	0.1	0.941385	0.0277654	190.99	315.7	5.3
M191T323	1.7389e+07	2.06376e+07	74.59	2.0928e+07	1.99858e+07	88.82	0.83	-0.27	0.95913	0.02	0.990641	0.140239	190.996	323.1	5.4
M191T342	1.48973e+07	1.48208e+07	6.69	1.4807e+07	1.49139e+07	12.46	1.01	0.01	0.95913	0.02	0.990641	0.147834	190.994	342.2	5.7
M191T351	6.00904e+07	5.72367e+07	30.98	4.24819e+07	3.98185e+07	58.79	1.41	0.5	0.160528	0.79	0.521677	1.32276	190.991	351.4	5.9
M191T363	5.80344e+07	3.84574e+07	87.34	4.68884e+07	3.14142e+07	73.47	1.24	0.31	0.720901	0.14	0.912378	0.280445	190.994	362.7	6
M191T404	2.98793e+07	2.83942e+07	23.29	3.50278e+07	2.90126e+07	41.23	0.85	-0.23	0.645377	0.19	0.878848	0.70179	190.993	403.7	6.7
M191T466	206309	214887	8.98	229317	221097	13.73	0.9	-0.15	0.104895	0.98	0.440144	1.22313	191.085	466.2	7.8
M191T472	1.46428e+07	1.45984e+07	25.3	1.36455e+07	1.40255e+07	42.16	1.07	0.1	1	0	1	0.507993	190.99	471.8	7.9
M191T504	19592415	9.30586e+06	106.68	2.1518e+07	7.13449e+06	102.87	0.91	-0.14	0.382284	0.42	0.730096	0.0728458	190.997	504.3	8.4
M191T539	1.35271e+07	1.3626e+07	62.7	1.49203e+07	1.40171e+07	21.31	0.91	-0.14	0.382284	0.42	0.730096	0.73423	190.991	538.9	9
M191T558	1.0536e+07	9.9903e+06	37.51	9.66773e+06	8.82355e+06	47.41	1.09	0.12	0.645377	0.19	0.878848	0.492048	190.996	558.3	9.3
M191T565_3	1.59792e+06	1.64771e+06	23.07	1.31832e+06	1.26031e+06	37.32	1.21	0.28	0.160528	0.79	0.521677	1.09874	191.053	565.1	9.4
M191T575	2.60404e+07	2.29304e+07	46.04	3.12554e+07	2.69373e+07	40.39	0.83	-0.26	0.328205	0.48	0.69011	0.682074	190.99	574.7	9.6
M191T62	1.16039e+08	1.17988e+08	10.93	9.06375e+07	8.85514e+07	8.38	1.28	0.36	0.000621601	3.21	0.069967	2.43128	190.992	62	1
M191T633	2.04842e+07	1.82592e+07	43.58	1.95459e+07	1.90117e+07	36.16	1.05	0.07	0.95913	0.02	0.990641	0.194725	190.996	633.3	10.6
M191T654	6.77003e+06	6.84889e+06	27.81	5.69471e+06	6.19519e+06	26.05	1.19	0.25	0.160528	0.79	0.521677	0.731042	190.99	653.9	10.9
M191T671	6.24187e+06	6.1717e+06	45.62	3.79886e+06	3.3758e+06	42.07	1.64	0.72	0.0829837	1.08	0.403171	1.49254	190.99	671	11.2
M191T690	7.42971e+06	7.08236e+06	23.43	1.17174e+07	1.07997e+07	42.47	0.63	-0.66	0.0829837	1.08	0.403171	1.55059	190.996	689.6	11.5
M191T704	4.23189e+06	3.72237e+06	52.26	3.1645e+06	3.29527e+06	30.57	1.34	0.42	0.441803	0.35	0.769616	0.725261	190.989	703.6	11.7
M191T73	5.09203e+06	5.25673e+06	29.36	3.97361e+06	4011170	43.69	1.28	0.36	0.328205	0.48	0.69011	0.923965	190.979	72.9	1.2
M191T81	1.34631e+08	1.27124e+08	18.8	1.07114e+08	9.30193e+07	32.46	1.26	0.33	0.0649573	1.19	0.368412	1.50243	190.912	80.7	1.3
M191T810_1	3.98639e+07	3.68414e+07	26.27	3.73747e+07	3.5424e+07	35.78	1.07	0.09	0.720901	0.14	0.912378	0.539506	191.143	810.2	13.5
M191T810_2	1.38122e+06	1.30321e+06	22.36	1.427e+06	1.38057e+06	16.37	0.97	-0.05	0.798446	0.1	0.941385	0.360565	191.179	810.4	13.5
M191T88	2.50293e+06	2.41029e+06	15.09	2.27718e+06	2.20219e+06	14.28	1.1	0.14	0.234499	0.63	0.606344	1.02925	191.066	88.3	1.5
M191T92	2.36773e+06	2.36101e+06	8.33	2.5517e+06	2.52932e+06	6.9	0.93	-0.11	0.104895	0.98	0.440144	1.39768	191.102	92.1	1.5
M192T105	1.74872e+07	1.70346e+07	30.42	6.44167e+06	4.96393e+06	73.23	2.71	1.44	0.0029526	2.53	0.116769	2.39571	192.056	104.5	1.7
M192T114	3.45241e+06	4.02266e+06	43.63	3.26272e+06	3.76399e+06	40.49	1.06	0.08	0.645377	0.19	0.878848	0.250109	192.033	113.5	1.9
M192T334	2.50077e+06	2.3175e+06	52.07	1.69991e+06	1.67534e+06	70.29	1.47	0.56	0.130381	0.88	0.480121	0.621842	192.066	333.8	5.6
M192T363	7.36937e+06	2.09032e+06	204.43	4.12409e+06	2.04589e+06	107.47	1.79	0.84	0.798446	0.1	0.941385	0.286895	192.138	363.2	6.1
M192T378	1.05807e+06	1.15479e+06	50.91	1.57568e+06	1.87528e+06	61.15	0.67	-0.57	0.194872	0.71	0.56435	0.731685	192.033	377.6	6.3
M192T384	145133	120184	67.65	360760	131877	111.54	0.4	-1.31	0.441803	0.35	0.769616	0.958628	192.077	384.1	6.4
M192T418	1.10191e+07	1.21812e+07	71.32	2.05433e+07	2.37703e+07	52	0.54	-0.9	0.0649573	1.19	0.368412	1.26826	192.068	417.9	7
M192T439	286510	271978	24.06	306988	313629	46.69	0.93	-0.1	0.573737	0.24	0.846615	0.194111	191.626	438.5	7.3
M192T440	2.75736e+06	2.49164e+06	55.48	3.46368e+06	3.05604e+06	39.24	0.8	-0.33	0.328205	0.48	0.69011	0.991893	192.106	440.5	7.3
M192T536	1.40088e+06	1.41092e+06	44.12	1.0972e+06	865723	70.02	1.28	0.35	0.328205	0.48	0.69011	0.908677	192.102	536	8.9
M192T62	1.95164e+06	1.9835e+06	13.8	1.95828e+06	2.02519e+06	16.98	1	0	0.95913	0.02	0.990641	0.0874026	191.992	62.4	1
M192T746	5.25988e+06	5.54405e+06	18.03	4.38965e+06	4.44964e+06	20.65	1.2	0.26	0.104895	0.98	0.440144	1.22603	192.138	746.4	12.4
M192T78	3.13764e+06	2.92857e+06	36.87	5.62226e+06	6.26871e+06	34.56	0.56	-0.84	0.014763	1.83	0.200021	1.82401	192.08	77.9	1.3
M192T81	2.63039e+06	2.62235e+06	21.52	2.47933e+06	2.54933e+06	31.17	1.06	0.09	0.505361	0.3	0.809141	0.462386	191.916	80.7	1.3
M192T810	3.87462e+06	4.2962e+06	25.41	3.46069e+06	3.10716e+06	38.43	1.12	0.16	0.441803	0.35	0.769616	0.639501	192.146	810.2	13.5
M193T105_1	856933	876102	7.18	778409	802911	14.67	1.1	0.14	0.104895	0.98	0.440144	1.25443	192.558	104.5	1.7
M193T105_2	459630	469623	50.01	569144	562026	14.38	0.81	-0.31	0.0829837	1.08	0.403171	1.22989	193.054	104.5	1.7
M193T113	164365	6007.2	181.7	121956	5297.86	179.88	1.35	0.43	0.441803	0.35	0.769616	0.131614	193.044	113	1.9
M193T122	5.3785e+07	4.91415e+07	52.77	5.13438e+07	4.01429e+07	39.9	1.05	0.07	0.95913	0.02	0.990641	0.129039	193.067	121.9	2
M193T173	7.1126e+06	6.79281e+06	14.64	6.01936e+06	6.03801e+06	10.48	1.18	0.24	0.0379176	1.42	0.297283	1.71667	193.068	172.6	2.9
M193T308	1382120	1.42718e+06	21.31	1.82272e+06	1.92982e+06	29.12	0.76	-0.4	0.0379176	1.42	0.297283	1.14812	192.982	308.5	5.1
M193T390	193594	199938	18.9	207046	206545	10.16	0.94	-0.1	0.720901	0.14	0.912378	0.732554	193.083	390	6.5
M193T406	659764	734673	56.6	821473	311608	104.07	0.8	-0.32	0.95913	0.02	0.990641	0.286143	193.138	406.1	6.8
M193T440	678445	620463	43.69	830032	942318	42.91	0.82	-0.29	0.505361	0.3	0.809141	0.411415	193.108	440.4	7.3
M193T461	1.13521e+06	1.18034e+06	37.07	1.46727e+06	1.52174e+06	25.31	0.77	-0.37	0.0829837	1.08	0.403171	1.27609	193.144	461.3	7.7
M193T551	371229	378975	36.1	380256	324342	32.85	0.98	-0.03	0.878477	0.06	0.967431	0.191492	193.097	551.2	9.2
M193T630	372627	378203	51.24	426469	470202	44.74	0.87	-0.19	0.645377	0.19	0.878848	0.461973	193.133	629.9	10.5
M193T73	1.39842e+06	841455	88.6	2.10477e+06	2.276e+06	49.75	0.66	-0.59	0.194872	0.71	0.56435	1.22044	192.976	72.9	1.2
M193T744	2.31043e+07	2.13793e+07	31.33	1.93878e+07	2.04595e+07	12.67	1.19	0.25	0.328205	0.48	0.69011	0.927647	193.159	744.3	12.4
M193T78_2	818830	862014	29.83	612950	621210	26.11	1.34	0.42	0.0829837	1.08	0.403171	1.30019	193.131	78.4	1.3
M193T81	1.8973e+07	1.9102e+07	43.24	2.45215e+07	2.32349e+07	30.56	0.77	-0.37	0.278632	0.55	0.649698	1.11351	192.91	80.7	1.3
M193T823	7.56834e+06	8.20045e+06	31.82	6.2194e+06	5.84487e+06	21.32	1.22	0.28	0.278632	0.55	0.649698	1.01114	193.122	823.2	13.7
M193T90	1.35527e+07	1.07857e+07	45.75	1.12017e+07	9.46766e+06	50.24	1.21	0.27	0.573737	0.24	0.846615	0.701896	193.154	90.1	1.5
M194T101	729602	593871	79.45	1.1328e+06	1.00878e+06	89.55	0.64	-0.63	0.798446	0.1	0.941385	0.332645	194.139	100.8	1.7
M194T102	1.13912e+07	1.23917e+07	49.36	9.77389e+06	1.04909e+07	62.65	1.17	0.22	0.573737	0.24	0.846615	0.581154	193.93	102	1.7
M194T106	2.53537e+06	2.46773e+06	7.76	4.0616e+06	2.5701e+06	79.44	0.62	-0.68	0.573737	0.24	0.846615	0.938386	194.048	105.6	1.8
M194T114	3.50273e+06	3.20608e+06	79.9	944167	974737	44.21	3.71	1.89	0.0829837	1.08	0.403171	1.60482	193.994	114.4	1.9
M194T122	2.77376e+06	1.05673e+06	89.68	5.58808e+06	5.76307e+06	42.02	0.5	-1.01	0.130381	0.88	0.480121	1.31564	193.57	121.9	2
M194T142	3.64725e+07	3.60899e+07	14.37	3.53331e+07	2.7728e+07	36.3	1.03	0.05	0.505361	0.3	0.809141	0.486594	194.118	141.6	2.4
M194T160	1.20144e+07	7.4702e+06	79.21	1.01151e+07	9.9042e+06	57.87	1.19	0.25	0.798446	0.1	0.941385	0.174503	194.118	160.1	2.7
M194T309	1.17634e+06	1.2183e+06	37.09	647719	544447	51.47	1.82	0.86	0.0206682	1.68	0.228643	1.85811	193.98	308.6	5.1
M194T313	5.82098e+07	5.77413e+07	36.53	6.03583e+07	5.72971e+07	34.68	0.96	-0.05	0.878477	0.06	0.967431	0.207762	194.117	313	5.2
M194T440	268784	231718	77.56	350529	334603	48.83	0.77	-0.38	0.328205	0.48	0.69011	0.979069	194.101	440.4	7.3
M194T492	6.39164e+06	6.35051e+06	12.79	5.15019e+06	4.9998e+06	34.88	1.24	0.31	0.160528	0.79	0.521677	1.34869	194.081	492.3	8.2
M194T744	4.08731e+06	3.78899e+06	38.93	3.22805e+06	2.69221e+06	71.18	1.27	0.34	0.0829837	1.08	0.403171	1.03135	194.162	744.2	12.4
M194T768	1.2385e+07	1.29894e+07	28.25	1.40247e+07	1.3458e+07	25.93	0.88	-0.18	0.573737	0.24	0.846615	0.691236	194.118	767.8	12.8
M194T82	5.93478e+06	5.98488e+06	14.97	1.49176e+07	1.42552e+07	57.89	0.4	-1.33	0.0018648	2.73	0.096514	1.9146	194.032	82.1	1.4
M194T84	2.75526e+06	2.7807e+06	7.37	3.12923e+06	3.19143e+06	8.24	0.88	-0.18	0.014763	1.83	0.200021	1.97568	194.102	84.4	1.4
M194T98	5.42865e+06	5.04258e+06	38.43	6.30731e+06	5.91732e+06	34.48	0.86	-0.22	0.441803	0.35	0.769616	0.681098	194.048	98.1	1.6
M195T106	621189	559049	73.97	439847	471570	54.64	1.41	0.5	0.505361	0.3	0.809141	0.364567	195.052	105.6	1.8
M195T309	1.20691e+07	1.38117e+07	46.78	9.69722e+06	1.08503e+07	44.98	1.24	0.32	0.130381	0.88	0.480121	0.450801	194.977	308.9	5.1
M195T325	636981	622164	12.49	571640	581862	13.46	1.11	0.16	0.194872	0.71	0.56435	1.14763	195.076	325.1	5.4
M195T383	5.85403e+06	4.20383e+06	97.81	6.119e+06	5.03908e+06	70.5	0.96	-0.06	0.645377	0.19	0.878848	0.433059	195.113	383	6.4
M195T437	2.73395e+06	2.80231e+06	16.27	6.39799e+06	2.98585e+06	142.76	0.43	-1.23	0.505361	0.3	0.809141	0.998306	195.088	436.9	7.3
M195T461	3.19032e+06	3.02801e+06	25.28	2.34543e+06	2.40112e+06	53.05	1.36	0.44	0.328205	0.48	0.69011	1.25398	195.113	460.5	7.7
M195T569	818148	722343	61.39	729472	733037	48.04	1.12	0.17	0.878477	0.06	0.967431	0.233203	194.662	569.3	9.5
M195T609	467367	412348	32.35	289604	270192	54.9	1.61	0.69	0.0379176	1.42	0.297283	1.63614	195.092	609.4	10.2
M195T68	428969	420080	37.46	419192	393692	24.91	1.02	0.03	0.878477	0.06	0.967431	0.0629863	195.129	68.4	1.1
M195T698	3.96906e+06	4.03451e+06	36.31	5.03304e+06	4.62885e+06	33.95	0.79	-0.34	0.382284	0.42	0.730096	1.08112	195.138	698.4	11.6
M195T707	6.59851e+06	6.49504e+06	31.21	5.21793e+06	5.14865e+06	25.61	1.26	0.34	0.160528	0.79	0.521677	1.15845	195.065	706.7	11.8
M195T72_1	1.00862e+06	961498	15.12	1.047e+06	1.04484e+06	8.31	0.96	-0.05	0.278632	0.55	0.649698	0.668749	194.925	71.8	1.2
M195T72_2	2.61018e+06	2.59891e+06	29.72	2.89714e+06	3.05135e+06	27.33	0.9	-0.15	0.382284	0.42	0.730096	0.496196	195.025	71.9	1.2
M195T73	1.73082e+06	818795	85.85	1.93802e+06	1.74077e+06	40.48	0.89	-0.16	0.328205	0.48	0.69011	0.736101	194.975	72.9	1.2
M195T730	2.96384e+06	2.81868e+06	38.59	3.95249e+06	2.66862e+06	114.4	0.75	-0.42	0.720901	0.14	0.912378	0.0425347	195.138	729.8	12.2
M195T750	3.02855e+06	2.7425e+06	64.27	5.55491e+06	5.31843e+06	46.73	0.55	-0.88	0.0498834	1.3	0.330421	1.6203	195.138	749.5	12.5
M195T751	1.942e+06	774922	181.36	1.12569e+06	805881	81.87	1.73	0.79	0.573737	0.24	0.846615	0.547781	195.174	750.7	12.5
M195T79	1.40301e+06	1.5979e+06	55.81	1.66454e+06	1.82441e+06	60.74	0.84	-0.25	0.382284	0.42	0.730096	0.357485	195.099	79.5	1.3
M195T823	2.8031e+08	2.61594e+08	19.57	3.00795e+08	3.00599e+08	37	0.93	-0.1	0.505361	0.3	0.809141	0.0775997	195.102	823.2	13.7
M196T105	3.24649e+07	4.32168e+07	64.95	4.84024e+07	4.80963e+07	60.17	0.67	-0.58	0.278632	0.55	0.649698	0.702322	196.064	104.7	1.7
M196T267	4.50336e+06	4.02218e+06	39.36	3.44447e+06	3451767	69.9	1.31	0.39	0.328205	0.48	0.69011	1.07426	196.155	267.2	4.5
M196T302	1.38841e+07	7.87528e+06	62.74	1.89356e+07	1.42428e+07	75.7	0.73	-0.45	0.95913	0.02	0.990641	0.491625	196.155	302.3	5
M196T309	339705	330930	26.15	337419	366307	28.29	1.01	0.01	1	0	1	0.146556	195.977	308.6	5.1
M196T353	6.33908e+06	1.87279e+06	156.19	5.9049e+06	1.73221e+06	146.92	1.07	0.1	0.878477	0.06	0.967431	0.375434	196.126	353.5	5.9
M196T362	1.21921e+06	1.30824e+06	41.49	2.50303e+06	1.21384e+06	109.85	0.49	-1.04	0.645377	0.19	0.878848	0.56383	196.097	362.1	6
M196T387	6.50722e+06	6.50987e+06	17.19	6.12873e+06	5.95077e+06	38.15	1.06	0.09	0.798446	0.1	0.941385	0.578611	196.108	386.7	6.4
M196T402	1.31616e+07	1.29195e+07	17.21	1.18756e+07	1.08272e+07	67.25	1.11	0.15	0.720901	0.14	0.912378	0.852915	196.133	401.6	6.7
M196T437	282224	265513	29.76	167822	157226	43.42	1.68	0.75	0.0281274	1.55	0.261699	1.83978	196.091	436.9	7.3
M196T552	482467	542286	41.28	396137	369511	38.55	1.22	0.28	0.573737	0.24	0.846615	0.691079	196.061	552.2	9.2
M196T567	431112	379414	44.7	427200	366141	50.13	1.01	0.01	0.798446	0.1	0.941385	0.0853056	196.133	566.9	9.4
M196T582	244403	242814	25.02	306810	314442	67.05	0.8	-0.33	0.645377	0.19	0.878848	0.0249371	196.052	581.8	9.7
M196T668	403004	389238	28.21	406552	432535	30.31	0.99	-0.01	0.878477	0.06	0.967431	0.111791	196.097	668.3	11.1
M196T707	501256	488158	40.46	385624	353551	43.55	1.3	0.38	0.160528	0.79	0.521677	0.990807	196.069	706.7	11.8
M196T730	537752	470334	51.05	320306	219168	59.1	1.68	0.75	0.0498834	1.3	0.330421	1.52389	196.052	729.6	12.2
M196T823	2.80021e+07	2.5295e+07	33.5	4.20392e+07	2.83363e+07	74.86	0.67	-0.59	0.573737	0.24	0.846615	0.519997	196.105	823.2	13.7
M196T97	4.09016e+06	4.17182e+06	22.44	3.7111e+06	3.95988e+06	27.46	1.1	0.14	0.573737	0.24	0.846615	0.551015	196.009	97.2	1.6
M197T102	5.49203e+06	5.36424e+06	17.83	6.53332e+06	6.79673e+06	29.94	0.84	-0.25	0.0649573	1.19	0.368412	0.610031	196.933	101.8	1.7
M197T105	2.19587e+06	2.30567e+06	56.28	2.42432e+06	2.31322e+06	38.78	0.91	-0.14	0.720901	0.14	0.912378	0.431019	197.067	104.7	1.7
M197T109	5.71902e+06	5.6653e+06	9.23	5.33709e+06	5.11259e+06	25.48	1.07	0.1	0.441803	0.35	0.769616	0.752432	196.933	108.7	1.8
M197T114_1	1.87412e+06	1.9709e+06	12.85	1.99964e+06	1.96713e+06	7.27	0.94	-0.09	0.441803	0.35	0.769616	1.01599	196.956	114.5	1.9
M197T114_2	3.56248e+06	4.16005e+06	49.16	3.6131e+06	4.27461e+06	41.95	0.99	-0.02	0.95913	0.02	0.990641	0.0940756	197.096	113.9	1.9
M197T267	863023	797884	51.23	553048	436370	61.57	1.56	0.64	0.104895	0.98	0.440144	1.18874	197.158	266.6	4.4
M197T308	825797	805820	30.47	690292	654859	32.77	1.2	0.26	0.234499	0.63	0.606344	0.885441	196.974	308.3	5.1
M197T310	1.04343e+06	1.02351e+06	15.38	973047	1.00033e+06	16.81	1.07	0.1	0.720901	0.14	0.912378	0.651296	197.059	309.5	5.2
M197T323	1.51921e+06	435359	209.3	430987	123814	131.12	3.52	1.82	0.720901	0.14	0.912378	0.394696	197.092	322.9	5.4
M197T353	1.22918e+06	1.36684e+06	46.25	1.49611e+06	1.57587e+06	73.41	0.82	-0.28	0.720901	0.14	0.912378	0.108153	197.128	353.3	5.9
M197T387	343804	337939	26.8	198188	149989	73.99	1.73	0.79	0.0498834	1.3	0.330421	1.72002	197.111	386.7	6.4
M197T402	1.36894e+06	1.40471e+06	42.83	952271	967998	41.56	1.44	0.52	0.130381	0.88	0.480121	1.08228	197.136	401.9	6.7
M197T412	131777	20835.5	180.87	372423	144001	154.23	0.35	-1.5	0.441803	0.35	0.769616	0.869265	197.056	412.2	6.9
M197T570	736617	738510	15.26	690002	722458	16.31	1.07	0.09	0.505361	0.3	0.809141	0.689547	197.117	570.1	9.5
M197T74	97393.9	95018.9	29.39	130770	141589	24.05	0.74	-0.43	0.0498834	1.3	0.330421	1.44149	196.928	73.6	1.2
M197T742	1.55954e+06	1.4898e+06	25.32	1.54136e+06	1.68559e+06	34.18	1.01	0.02	1	0	1	0.173053	197.117	742.2	12.4
M197T778	287001	258948	38.45	292330	253272	44.86	0.98	-0.03	0.95913	0.02	0.990641	0.0331003	197.117	778.5	13
M197T82_2	2.27567e+07	2.36681e+07	41.56	2.40146e+07	2.49974e+07	57.11	0.95	-0.08	0.720901	0.14	0.912378	0.0682295	197.101	82.3	1.4
M197T88	1.39909e+06	1.35753e+06	10.15	1.48419e+06	1.42922e+06	12.67	0.94	-0.09	0.328205	0.48	0.69011	0.777482	196.961	88.5	1.5
M197T90	2.63494e+06	2.79373e+06	18.37	2.85955e+06	2.7162e+06	18.78	0.92	-0.12	0.505361	0.3	0.809141	0.667306	197.059	89.9	1.5
M198T102_1	1.4903e+06	1.45003e+06	7.78	1.12851e+06	1.20104e+06	29.23	1.32	0.4	0.0018648	2.73	0.096514	1.53542	197.988	102	1.7
M198T105	1.27355e+06	1.25573e+06	15.27	800854	832192	53.07	1.59	0.67	0.0379176	1.42	0.297283	1.74288	198.06	104.6	1.7
M198T108	1.12553e+07	7.66075e+06	69.76	8.57283e+06	5.74118e+06	76.39	1.31	0.39	0.798446	0.1	0.941385	0.562225	198.043	108.2	1.8
M198T122	5.67799e+06	5.03619e+06	41.03	5.36895e+06	5.32332e+06	19.47	1.06	0.08	0.798446	0.1	0.941385	0.103519	198.088	122	2
M198T372	4.19916e+06	3.92273e+06	31.44	3.28444e+06	3.66106e+06	51.32	1.28	0.35	0.441803	0.35	0.769616	1.04052	198.076	372.5	6.2
M198T526	2.72445e+07	2.85757e+07	30.37	2.53323e+07	2.5714e+07	29.39	1.08	0.1	0.720901	0.14	0.912378	0.367714	198.128	525.6	8.8
M198T535	1.35045e+06	1.29116e+06	24.66	1.05513e+06	881891	41.52	1.28	0.36	0.0829837	1.08	0.403171	1.27634	198.076	535.1	8.9
M198T536	1.32196e+06	1.34745e+06	39.54	1.26796e+06	951412	64.38	1.04	0.06	0.720901	0.14	0.912378	0.352355	198.113	535.5	8.9
M198T592	3.9427e+06	3.3927e+06	35.17	2.94092e+06	2.92211e+06	27.77	1.34	0.42	0.104895	0.98	0.440144	1.25088	198.149	592.4	9.9
M198T611	3.48985e+06	1.44647e+06	148.17	2.57714e+06	1.54206e+06	134.13	1.35	0.44	0.645377	0.19	0.878848	0.205122	198.149	611.5	10.2
M198T73	979021	856362	35.86	1.05906e+06	1.02783e+06	20.48	0.92	-0.11	0.441803	0.35	0.769616	0.675166	197.927	73.5	1.2
M198T807	1.85392e+06	1.30112e+06	62.69	1.38172e+06	1.23845e+06	32.48	1.34	0.42	0.645377	0.19	0.878848	0.616295	198.185	807.2	13.5
M198T90	1.6658e+07	9.3444e+06	87.57	2.51616e+07	2.4857e+07	50.51	0.66	-0.6	0.328205	0.48	0.69011	1.05591	198.043	90.5	1.5
M199T108	450427	402789	28.81	524719	523967	27.77	0.86	-0.22	0.441803	0.35	0.769616	0.808651	199.047	108.2	1.8
M199T137	1.67236e+07	1.66933e+07	13.36	1.44367e+07	1.31425e+07	35.26	1.16	0.21	0.130381	0.88	0.480121	1.13896	198.971	136.5	2.3
M199T323	2.21082e+06	2146254	41.35	1.29977e+06	1.10147e+06	55.57	1.7	0.77	0.0281274	1.55	0.261699	1.65194	199.108	323.2	5.4
M199T395	187357	143239	87.47	46038.9	46512.2	71.64	4.07	2.02	0.004662	2.33	0.129379	1.95532	199.008	395.4	6.6
M199T396	1.00928e+06	779198	69.1	869588	926489	48.55	1.16	0.21	0.878477	0.06	0.967431	0.162097	199.157	395.8	6.6
M199T455	701823	668516	43.41	665877	704763	27.69	1.05	0.08	0.878477	0.06	0.967431	0.0760675	199.06	454.8	7.6
M199T519	4.60487e+06	4.70762e+06	41.57	5.23627e+06	5.83201e+06	47.27	0.88	-0.19	0.798446	0.1	0.941385	0.282002	199.144	519.2	8.7
M199T526	3.83765e+06	3.72709e+06	27.38	4.11988e+06	4.34326e+06	24.51	0.93	-0.1	0.878477	0.06	0.967431	0.436144	199.131	525.6	8.8
M199T606	339593	258387	54.53	323820	347956	46.33	1.05	0.07	0.878477	0.06	0.967431	0.129694	199.123	606	10.1
M199T611	513023	263474	135.13	488556	259611	142.37	1.05	0.07	0.573737	0.24	0.846615	0.356265	199.153	611.5	10.2
M199T655	156643	154443	22.47	154546	140203	49.94	1.01	0.02	0.720901	0.14	0.912378	0.369412	199.188	655.4	10.9
M199T752	2258172	2.22671e+06	31.62	2.09686e+06	1.96647e+06	22.11	1.08	0.11	0.720901	0.14	0.912378	0.341684	199.132	752.3	12.5
M199T770	1.2586e+07	1.3611e+07	41.88	1.35083e+07	1.32847e+07	29.07	0.93	-0.1	0.645377	0.19	0.878848	0.448535	199.169	770.3	12.8
M199T82	9.6838e+06	9.57268e+06	5.36	9.42943e+06	9.51942e+06	6.83	1.03	0.04	0.573737	0.24	0.846615	0.56898	198.876	82.1	1.4
M199T91	594833	594422	3.94	682864	680167	7.69	0.87	-0.2	0.000621601	3.21	0.069967	2.2401	199.047	90.8	1.5
M200T113	1.37234e+06	1.42502e+06	49.04	1.40594e+06	1.37252e+06	22.18	0.98	-0.03	0.798446	0.1	0.941385	0.536507	200.091	112.6	1.9
M200T327	7.70789e+06	7.81526e+06	15.5	8.05449e+06	7.65311e+06	19.47	0.96	-0.06	0.645377	0.19	0.878848	0.366256	200.091	327.4	5.5
M200T400_1	625822	574812	23.32	1.79597e+06	1.21883e+06	79.02	0.35	-1.52	0.0206682	1.68	0.228643	1.77317	199.88	399.6	6.7
M200T400_2	2.93593e+09	3.01582e+09	35.81	4.38913e+09	4.47079e+09	24.53	0.67	-0.58	0.0206682	1.68	0.228643	1.67187	200.047	399.5	6.7
M200T400_3	3.3043e+06	3.28152e+06	31.62	2.33196e+06	1.72074e+06	84.25	1.42	0.5	0.0281274	1.55	0.261699	1.49039	200.214	399.6	6.7
M200T426	815180	880634	35.1	748528	772746	43.37	1.09	0.12	0.645377	0.19	0.878848	0.498925	200.165	426.1	7.1
M200T461	159409	145941	27.52	143809	124448	32.39	1.11	0.15	0.382284	0.42	0.730096	0.628893	200.056	461.5	7.7
M200T519	197399	189001	55.55	185263	147828	63.14	1.07	0.09	0.798446	0.1	0.941385	0.241275	200.148	519.2	8.7
M200T525	428117	438918	32.43	390034	356113	45.81	1.1	0.13	0.798446	0.1	0.941385	0.570683	200.074	525.4	8.8
M200T526	153840	128749	72.75	125458	125124	73.79	1.23	0.29	0.798446	0.1	0.941385	0.378275	200.135	525.6	8.8
M200T577	5.49147e+06	4.35101e+06	53.94	4.39227e+06	4.56572e+06	51.31	1.25	0.32	0.573737	0.24	0.846615	0.646752	200.143	577.2	9.6
M200T582	2.32334e+06	2.16943e+06	73.87	3.44913e+06	2.05723e+06	93.22	0.67	-0.57	0.720901	0.14	0.912378	0.261555	200.047	581.8	9.7
M200T625	477926	406818	43.22	433773	453191	16.82	1.1	0.14	0.95913	0.02	0.990641	0.208104	200.128	625.1	10.4
M200T64	5.29751e+06	5.41764e+06	56.75	4.30776e+06	4.22243e+06	61.19	1.23	0.3	0.441803	0.35	0.769616	0.512678	200.237	64.2	1.1
M200T648	1.79448e+07	1.97488e+07	39.98	9.90333e+06	9.22641e+06	36.31	1.81	0.86	0.0206682	1.68	0.228643	1.63482	200.165	647.7	10.8
M200T703	2.24403e+06	2.11579e+06	29.6	1.61949e+06	1.64357e+06	28.76	1.39	0.47	0.130381	0.88	0.480121	1.38298	200.165	703.2	11.7
M200T742	6.13259e+06	6.09467e+06	56.88	4.01161e+06	4.51567e+06	46.67	1.53	0.61	0.278632	0.55	0.649698	1.00155	200.147	742	12.4
M200T770	926291	790233	52.06	1.57942e+06	1.38202e+06	30.05	0.59	-0.77	0.0498834	1.3	0.330421	1.70874	200.172	770.5	12.8
M200T80	1.48228e+07	1.4226e+07	11.7	1.55844e+07	1.56004e+07	12.49	0.95	-0.07	0.382284	0.42	0.730096	0.604119	200.041	79.6	1.3
M201T102	6.66967e+06	6.49334e+06	12.25	6.28393e+06	6.29444e+06	10.71	1.06	0.09	0.328205	0.48	0.69011	0.742802	201.065	101.8	1.7
M201T104	3.04471e+07	2.84571e+07	40.48	3.13315e+07	3.21905e+07	27.13	0.97	-0.04	0.645377	0.19	0.878848	0.285259	201.016	103.7	1.7
M201T113	2.07875e+06	1.99878e+06	69.07	1.94337e+06	2.14182e+06	50.92	1.07	0.1	0.720901	0.14	0.912378	0.151102	201.052	112.7	1.9
M201T327	598004	420063	69.05	670273	625735	49.61	0.89	-0.16	0.505361	0.3	0.809141	0.396998	201.095	327.4	5.5
M201T48	3.94495e+06	3.68282e+06	30.55	4.45469e+06	4.90121e+06	29.51	0.89	-0.18	0.441803	0.35	0.769616	0.566475	200.971	47.7	0.8
M201T540	507779	441718	34.94	671177	653855	29.11	0.76	-0.4	0.0829837	1.08	0.403171	1.26948	201.128	540.1	9
M201T559	925978	853638	55.68	1.34846e+06	1.52601e+06	54.59	0.69	-0.54	0.130381	0.88	0.480121	0.733964	201.128	558.8	9.3
M201T573_1	8.33565e+07	7.85643e+07	46.38	7.62232e+07	7.41461e+07	41.9	1.09	0.13	0.798446	0.1	0.941385	0.325226	200.521	573.2	9.6
M201T573_2	2.76009e+07	2.66221e+07	36.24	4.42935e+07	4.60507e+07	36.34	0.62	-0.68	0.0379176	1.42	0.297283	1.59551	200.856	573.1	9.6
M201T573_3	4.2267e+06	3.62444e+06	55.41	3937727	4.0557e+06	57.99	1.07	0.1	0.573737	0.24	0.846615	0.249741	201.19	573.2	9.6
M201T577	727287	582020	53.18	671661	587581	54.89	1.08	0.11	0.95913	0.02	0.990641	0.176524	201.147	577.2	9.6
M201T642	1.22244e+07	1.42105e+07	46.38	1.20718e+07	1.2161e+07	51.66	1.01	0.02	0.798446	0.1	0.941385	0.213222	201.159	642	10.7
M201T72	7.30073e+06	7.59611e+06	45.01	7.38782e+06	6.31723e+06	33.63	0.99	-0.02	1	0	1	0.307408	200.974	71.6	1.2
M201T726	1.43045e+06	1.34957e+06	38.81	990850	906148	28.04	1.44	0.53	0.0649573	1.19	0.368412	1.44565	201.172	725.5	12.1
M201T734	1.15884e+06	1.07046e+06	32.96	1.13095e+06	1.06766e+06	44.73	1.02	0.04	0.798446	0.1	0.941385	0.301078	201.127	734	12.2
M201T779	1677636	1.65599e+06	27.68	962834	902365	36.68	1.74	0.8	0.00699301	2.16	0.14968	1.98645	201.196	779	13
M201T797	4.66971e+06	4.30449e+06	42.63	4.6841e+06	4.92252e+06	47.91	1	0	0.798446	0.1	0.941385	0.147146	201.128	796.6	13.3
M201T84	5.83954e+06	5.74382e+06	11.93	5.72052e+06	5.68616e+06	11.12	1.02	0.03	0.798446	0.1	0.941385	0.234728	201.054	84.3	1.4
M201T98	1.20276e+06	1.30896e+06	51.21	1.7716e+06	1.76854e+06	52.35	0.68	-0.56	0.234499	0.63	0.606344	0.332113	200.987	97.7	1.6
M202T102	678763	551680	54.93	603000	387080	78.83	1.13	0.17	0.234499	0.63	0.606344	0.564838	201.567	101.8	1.7
M202T104	1.31022e+06	1.1307e+06	42.56	1.71229e+06	1.73809e+06	30.94	0.77	-0.39	0.194872	0.71	0.56435	1.06374	202.019	103.7	1.7
M202T110	782251	875499	50.53	527102	238743	91.45	1.48	0.57	0.573737	0.24	0.846615	0.943919	202.071	109.8	1.8
M202T111	1.97997e+06	1.82501e+06	22.49	4.92854e+06	4.59361e+06	61	0.4	-1.32	0.0281274	1.55	0.261699	1.82852	202.082	110.9	1.8
M202T122	2.37806e+08	2.39516e+08	10.6	3.3272e+08	3.27891e+08	26.78	0.71	-0.48	0.0104118	1.98	0.169968	1.9059	202.18	121.9	2
M202T140	1.84402e+07	1.73226e+07	27.31	1.46924e+07	1.38293e+07	20.12	1.26	0.33	0.0829837	1.08	0.403171	1.3231	202.107	140	2.3
M202T160	1.75386e+07	1.75221e+07	66.19	3.46202e+07	3.29092e+07	50.2	0.51	-0.98	0.0649573	1.19	0.368412	1.49299	202.18	159.7	2.7
M202T228	2.2793e+06	2.43944e+06	27.76	1.26971e+06	787438	66.52	1.8	0.84	0.0206682	1.68	0.228643	1.70511	202.071	227.9	3.8
M202T233	1.61827e+07	1.64776e+07	15.65	1.10067e+07	1.13207e+07	42.37	1.47	0.56	0.0206682	1.68	0.228643	1.76746	202.108	232.8	3.9
M202T260	6.04852e+07	6.12494e+07	23.91	3.31005e+07	3.41776e+07	26.92	1.83	0.87	0.0001554	3.81	0.0532196	2.1532	202.108	260.2	4.3
M202T288	579363	359826	71.76	771694	671295	62.71	0.75	-0.41	0.441803	0.35	0.769616	0.65902	202.071	288.4	4.8
M202T298	1.18595e+06	863160	60.11	1.44051e+06	1.20008e+06	50.87	0.82	-0.28	0.573737	0.24	0.846615	0.649104	202.18	297.7	5
M202T301	3.76847e+06	4.12172e+06	32.14	2.3635e+06	2.20966e+06	75.36	1.59	0.67	0.104895	0.98	0.440144	1.42175	202.071	301.4	5
M202T356	4.66047e+07	5.11252e+07	27.79	2.45148e+07	2.29788e+07	24.13	1.9	0.93	0.0029526	2.53	0.116769	2.29593	202.107	356.4	5.9
M202T358	1.01476e+06	1.01583e+06	48.7	866109	1.01339e+06	45	1.17	0.23	0.645377	0.19	0.878848	0.326154	202.144	357.5	6
M202T400	7.54847e+08	6.87839e+08	48.48	1.39218e+09	1.23081e+09	50.57	0.54	-0.88	0.0281274	1.55	0.261699	1.49572	202.044	399.5	6.7
M202T439	3.66177e+06	3.52676e+06	59.73	3.55689e+06	3.55027e+06	60.62	1.03	0.04	0.878477	0.06	0.967431	0.0326059	202.18	438.7	7.3
M202T465	186280	180802	32.58	153960	159656	27.74	1.21	0.27	0.234499	0.63	0.606344	0.880178	202.053	465.4	7.8
M202T502	565579	396581	82.99	453137	319140	77.64	1.25	0.32	0.720901	0.14	0.912378	0.341911	202.217	501.9	8.4
M202T573	388403	325200	37.27	205761	165619	77.8	1.89	0.92	0.130381	0.88	0.480121	1.68938	201.524	573.2	9.6
M202T582	997902	1.04967e+06	32.03	1.11331e+06	881536	77.31	0.9	-0.16	0.878477	0.06	0.967431	0.343474	202.045	581.8	9.7
M202T595	673252	618637	55.59	442830	433262	32.02	1.52	0.6	0.130381	0.88	0.480121	1.27091	202.144	595.2	9.9
M202T624	693711	552020	53.12	320246	301579	39.07	2.17	1.12	0.0281274	1.55	0.261699	1.83257	202.217	623.7	10.4
M202T642	729265	668534	22.32	623540	586619	35.03	1.17	0.23	0.234499	0.63	0.606344	0.966796	202.163	642	10.7
M202T680	4.168e+06	4.52518e+06	29.6	5.12823e+06	5.31842e+06	22.22	0.81	-0.3	0.160528	0.79	0.521677	1.07261	202.217	680.5	11.3
M202T694	1.0232e+06	1.05104e+06	26.83	1.20377e+06	1.24982e+06	21.33	0.85	-0.23	0.130381	0.88	0.480121	0.9084	202.162	694.4	11.6
M202T72	1.62379e+06	1.70284e+06	37.49	2.27143e+06	2.14273e+06	35.45	0.71	-0.48	0.0829837	1.08	0.403171	1.17241	201.974	71.7	1.2
M202T725	302507	297175	23.87	222624	221519	18.62	1.36	0.44	0.0379176	1.42	0.297283	1.71183	201.674	725.4	12.1
M202T83_1	2.51164e+07	2.56474e+07	6.12	2.58759e+07	2.66217e+07	11.81	0.97	-0.04	0.278632	0.55	0.649698	0.352729	201.933	83.3	1.4
M203T101	2.84738e+06	2.85951e+06	3.36	2.74817e+06	2.6116e+06	14.48	1.04	0.05	0.441803	0.35	0.769616	0.624067	203.049	101.4	1.7
M203T109	5.11294e+06	5.17428e+06	12.47	5.84904e+06	5.62328e+06	8.85	0.87	-0.19	0.104895	0.98	0.440144	1.66656	203.114	109.5	1.8
M203T111	452843	440787	15.53	427759	368309	58.08	1.06	0.08	0.234499	0.63	0.606344	0.684167	203.086	111	1.9
M203T122	5.08989e+07	4.96888e+07	25.68	3.61961e+07	2.61596e+07	69.14	1.41	0.49	0.0498834	1.3	0.330421	1.41438	203.183	121.9	2
M203T258	1.36852e+06	1.33259e+06	33.04	1.26006e+06	1.15835e+06	44.37	1.09	0.12	0.798446	0.1	0.941385	0.501296	203.003	257.9	4.3
M203T311	1.63056e+06	1.70906e+06	35.5	2.31934e+06	2.48111e+06	28.99	0.7	-0.51	0.104895	0.98	0.440144	1.49702	202.566	310.7	5.2
M203T323	1.79343e+06	1.67465e+06	17.54	1.59987e+06	1.48707e+06	40.71	1.12	0.16	0.645377	0.19	0.878848	0.846168	202.566	323.4	5.4
M203T356	1.554e+06	1548924	26.93	2.31156e+06	2.54609e+06	39.28	0.67	-0.57	0.130381	0.88	0.480121	1.32515	203.111	356.4	5.9
M203T365	1.12676e+06	1.18249e+06	33.99	1.18036e+06	1.13092e+06	24.34	0.95	-0.07	0.95913	0.02	0.990641	0.41538	203.139	365.5	6.1
M203T400	1.85627e+08	1.76716e+08	23.73	1.42272e+08	1.38905e+08	30.19	1.3	0.38	0.0829837	1.08	0.403171	1.48744	203.048	399.5	6.7
M203T439	332063	374569	53.81	480268	526316	35.63	0.69	-0.53	0.0829837	1.08	0.403171	1.03525	203.183	438.7	7.3
M203T555	5.15792e+06	4.86426e+06	27.51	4.09661e+06	3.81465e+06	47.57	1.26	0.33	0.0829837	1.08	0.403171	1.1784	203.11	554.8	9.2
M203T565	868580	904185	37.14	1.03846e+06	975990	58.81	0.84	-0.26	0.720901	0.14	0.912378	0.401863	202.561	565.1	9.4
M203T681	457618	378877	46.89	497090	446401	45.8	0.92	-0.12	0.720901	0.14	0.912378	0.312288	203.22	680.6	11.3
M203T70	1.06605e+06	1.12915e+06	21.34	1.06781e+06	937602	32.47	1	0	0.573737	0.24	0.846615	0.132762	202.629	70	1.2
M203T707	410616	468388	51.34	595801	627518	37.31	0.69	-0.54	0.0829837	1.08	0.403171	0.9619	203.091	707.2	11.8
M203T72_1	2.95667e+06	3.48331e+06	61.24	1.98134e+06	1.76079e+06	75.26	1.49	0.58	0.160528	0.79	0.521677	0.749874	202.97	71.7	1.2
M203T72_2	1.08706e+06	1.07879e+06	6.68	1.12498e+06	1.13212e+06	4.31	0.97	-0.05	0.278632	0.55	0.649698	0.951282	203.007	71.8	1.2
M203T747	2.09695e+06	1.81853e+06	44.43	2.06223e+06	1.90307e+06	25.47	1.02	0.02	0.798446	0.1	0.941385	0.151887	203.107	747	12.4
M203T91	339926	287219	50.03	927167	912158	45.16	0.37	-1.45	0.0029526	2.53	0.116769	2.21627	203.053	90.9	1.5
M203T94	4.43402e+07	4.3529e+07	25.93	5.69539e+07	4.99109e+07	45.22	0.78	-0.36	0.382284	0.42	0.730096	0.905102	203.15	94.3	1.6
M203T97	9.5807e+06	9.64086e+06	7.03	1.06889e+07	1.07514e+07	10.72	0.9	-0.16	0.130381	0.88	0.480121	1.59604	203.102	96.7	1.6
M204T105_1	8.08884e+06	6.8132e+06	36.17	7.04019e+06	6.63883e+06	21.08	1.15	0.2	0.573737	0.24	0.846615	0.696462	204.032	105.3	1.8
M204T117	4.81806e+07	4.88894e+07	10.57	5.26427e+07	5.2617e+07	7.23	0.92	-0.13	0.0379176	1.42	0.297283	1.36092	204.087	116.6	1.9
M204T122	2.9961e+09	2.75481e+09	30.42	4.31116e+09	4.73456e+09	25.79	0.69	-0.52	0.0281274	1.55	0.261699	1.62381	204.122	121.5	2
M204T136	2.74355e+08	2.30153e+08	71.52	3.03962e+08	2.99515e+08	28.62	0.9	-0.15	0.505361	0.3	0.809141	0.738008	204.122	135.9	2.3
M204T204	1.49954e+06	1.50201e+06	10.25	1.40128e+06	1.37347e+06	10.17	1.07	0.1	0.234499	0.63	0.606344	1.02586	203.971	203.5	3.4
M204T304	1.01878e+06	992314	19.86	1.18217e+06	1.11357e+06	60.34	0.86	-0.21	0.878477	0.06	0.967431	0.0911735	204.124	303.7	5.1
M204T324	1.28582e+06	440224	178.92	1.32788e+06	360772	188.75	0.97	-0.05	0.505361	0.3	0.809141	0.476803	204.123	324	5.4
M204T371	1415440	737481	98.8	1.14627e+06	1.16764e+06	60.6	1.23	0.3	0.95913	0.02	0.990641	0.0174002	204.123	371	6.2
M204T375	9.68821e+06	9.07358e+06	58.72	6.48314e+06	5.86481e+06	77.21	1.49	0.58	0.234499	0.63	0.606344	0.996411	204.032	375	6.2
M204T390	488703	532240	60.49	500571	566193	41.44	0.98	-0.03	0.878477	0.06	0.967431	0.278779	204.113	390	6.5
M204T474	160858	128492	60.85	842929	313613	112.77	0.19	-2.39	0.014763	1.83	0.200021	1.84928	204.069	473.7	7.9
M204T478	1.64182e+06	1.45396e+06	38.95	2.15396e+06	2.20103e+06	47.97	0.76	-0.39	0.441803	0.35	0.769616	0.730253	204.195	477.6	8
M204T511	7.01479e+06	6.85328e+06	31.64	6.118e+06	6.47024e+06	36.75	1.15	0.2	0.573737	0.24	0.846615	0.675077	204.123	511.4	8.5
M204T527	332003	366360	37.42	246905	256058	43.2	1.34	0.43	0.160528	0.79	0.521677	1.00473	204.105	527.4	8.8
M204T555	505354	464317	33.48	389238	383067	25.62	1.3	0.38	0.104895	0.98	0.440144	1.27354	204.113	554.8	9.2
M204T75	1.79732e+06	1.84753e+06	53.07	1.3351e+06	804934	64.92	1.35	0.43	0.328205	0.48	0.69011	0.895159	204.134	75.1	1.3
M204T90	1.27628e+07	1.48978e+07	37.05	1.45095e+07	1.66114e+07	32.24	0.88	-0.19	0.328205	0.48	0.69011	0.491025	204.087	90.4	1.5
M204T94	2.40545e+06	2.52094e+06	45.14	3.26376e+06	2.95634e+06	35.15	0.74	-0.44	0.160528	0.79	0.521677	1.19248	204.153	94.1	1.6
M204T98	1.54491e+07	1.41979e+07	30.67	1.87113e+07	1.95286e+07	20.48	0.83	-0.28	0.234499	0.63	0.606344	1.10313	204.098	98	1.6
M204T99	2.63597e+07	2.58562e+07	12.16	3.30389e+07	3.16897e+07	34.08	0.8	-0.33	0.382284	0.42	0.730096	1.04481	204.087	99.2	1.7
M205T105	162484	108480	85.02	314217	319677	74.95	0.52	-0.95	0.278632	0.55	0.649698	0.630322	205.036	105.3	1.8
M205T115	437049	437073	67.42	670821	712662	50.64	0.65	-0.62	0.160528	0.79	0.521677	1.11649	204.993	114.6	1.9
M205T116	3.68298e+06	4.16398e+06	37.57	5.96044e+06	5.63027e+06	39.63	0.62	-0.69	0.0281274	1.55	0.261699	1.47195	205.09	116.4	1.9
M205T121	2.51287e+06	2.64653e+06	21.37	3.05047e+06	2.79979e+06	44.39	0.82	-0.28	0.645377	0.19	0.878848	0.581914	205.064	120.9	2
M205T122	4.35061e+08	4.30786e+08	19.45	2.90441e+08	3.29316e+08	54.12	1.5	0.58	0.0379176	1.42	0.297283	1.55933	205.126	121.5	2
M205T137	1.4194e+06	1.52973e+06	40.01	1.41032e+06	1.55165e+06	34.51	1.01	0.01	0.878477	0.06	0.967431	0.0679604	205.029	137.1	2.3
M205T203	2.30227e+06	2.18813e+06	47.63	1.09176e+06	1.08527e+06	27.41	2.11	1.08	0.014763	1.83	0.200021	1.6515	204.98	203.3	3.4
M205T712	2.05974e+06	1.70046e+06	39.16	1.86514e+06	1.71586e+06	34.47	1.1	0.14	0.645377	0.19	0.878848	0.486032	205.122	711.8	11.9
M205T737	7.09159e+06	7.625e+06	36.33	6.29044e+06	6.58094e+06	35.84	1.13	0.17	0.573737	0.24	0.846615	0.494887	205.143	737.5	12.3
M205T769	1.61792e+06	1.70237e+06	20.84	1.54544e+06	1.45511e+06	20.3	1.05	0.07	0.878477	0.06	0.967431	0.278192	205.122	769.5	12.8
M205T77	35476.6	7407.73	129.47	119036	100134	82.92	0.3	-1.75	0.0379176	1.42	0.297283	1.68814	204.957	77	1.3
M205T79	3.74998e+06	3.81178e+06	5.95	4.06785e+06	3.75764e+06	20.05	0.92	-0.12	0.95913	0.02	0.990641	0.711329	205.155	78.5	1.3
M205T804	4.33252e+06	4.30561e+06	38.31	5.64473e+06	6.3447e+06	29.27	0.77	-0.38	0.160528	0.79	0.521677	1.16848	205.137	803.7	13.4
M205T836	5.68945e+06	6.09403e+06	34.86	4.25087e+06	3.75635e+06	30.26	1.34	0.42	0.130381	0.88	0.480121	1.29721	205.159	835.9	13.9
M205T98	4.8804e+06	5.15835e+06	58.45	1.43669e+06	1.11992e+06	77.96	3.4	1.76	0.0104118	1.98	0.169968	1.90081	205.101	98.2	1.6
M206T101	1.24106e+06	1.16741e+06	22.09	1.25943e+06	1.15601e+06	60.73	0.99	-0.02	0.95913	0.02	0.990641	0.5807	206.121	100.8	1.7
M206T110	1.46219e+06	1.42352e+06	16.55	1.3029e+06	1.29748e+06	15.38	1.12	0.17	0.234499	0.63	0.606344	1.03478	206.066	109.5	1.8
M206T112	2.53236e+06	2.47566e+06	20	1.76925e+06	1.54368e+06	61.08	1.43	0.52	0.278632	0.55	0.649698	1.43389	206.139	112.4	1.9
M206T113	2.22044e+07	2.08394e+07	22.12	2.98099e+07	31449021	31.3	0.74	-0.42	0.0649573	1.19	0.368412	1.3378	206.152	112.8	1.9
M206T122	2.38697e+07	1.64948e+07	85.23	4.83671e+07	4.89784e+07	19.15	0.49	-1.02	0.0281274	1.55	0.261699	1.92664	206.127	121.5	2
M206T356	4.9104e+06	4.69982e+06	17.35	4.3568e+06	3.97439e+06	35	1.13	0.17	0.382284	0.42	0.730096	0.824506	206.138	356.1	5.9
M206T390	451326	239039	98.37	312513	118693	103.39	1.44	0.53	0.328205	0.48	0.69011	0.75103	206.049	390.2	6.5
M206T403	2.17153e+06	2.49695e+06	46.78	2.25815e+06	2.28657e+06	36.13	0.96	-0.06	0.95913	0.02	0.990641	0.223184	206.056	403.4	6.7
M206T454_2	277382	284069	27.83	319277	324790	40.49	0.87	-0.2	0.645377	0.19	0.878848	0.498264	206.048	454.3	7.6
M206T545	1.0273e+06	824288	52.46	848240	699986	45.46	1.21	0.28	0.645377	0.19	0.878848	0.451148	206.081	545.3	9.1
M206T689	231104	207916	25.2	262995	280127	37.87	0.88	-0.19	0.382284	0.42	0.730096	0.382566	206.19	688.8	11.5
M206T697	736381	683529	38.32	891420	849698	29.69	0.83	-0.28	0.194872	0.71	0.56435	0.897808	205.614	697.3	11.6
M206T737	649234	580317	32.2	716252	728483	51.48	0.91	-0.14	1	0	1	0.119663	206.147	737.4	12.3
M206T83	1.25838e+07	6.83004e+06	73.27	1.0969e+07	5.50698e+06	82.67	1.15	0.2	0.328205	0.48	0.69011	0.415623	206.055	83.5	1.4
M206T91	776789	688322	32.71	715525	712555	30.99	1.09	0.12	0.95913	0.02	0.990641	0.371541	206.066	91.2	1.5
M206T99	1.05868e+07	1.00351e+07	22.41	8072321	7.65601e+06	32.07	1.31	0.39	0.0379176	1.42	0.297283	1.48304	206.102	98.9	1.6
M207T113_2	255521	222971	75.3	343465	425516	45.02	0.74	-0.43	0.382284	0.42	0.730096	0.864474	207.155	112.8	1.9
M207T114	602581	604508	22.19	530831	569065	14.85	1.14	0.18	0.441803	0.35	0.769616	0.960124	206.959	114.3	1.9
M207T348	1.9333e+06	1.95013e+06	13.75	1.6566e+06	1.54525e+06	17.84	1.17	0.22	0.0649573	1.19	0.368412	1.46942	207.088	347.9	5.8
M207T377	1.22337e+06	1.1926e+06	28.6	1.03837e+06	817911	48.1	1.18	0.24	0.0829837	1.08	0.403171	0.97836	207.076	377.5	6.3
M207T397	4.11064e+06	3.9094e+06	36.66	8.14404e+06	4.75264e+06	101.12	0.5	-0.99	0.573737	0.24	0.846615	0.522254	207.103	397.2	6.6
M207T423	219577	112192	100.29	207680	116984	120.7	1.06	0.08	0.645377	0.19	0.878848	0.275028	207.059	423.1	7.1
M207T587	382684	362586	41.04	346313	349286	27.46	1.11	0.14	0.720901	0.14	0.912378	0.315157	206.662	586.7	9.8
M207T596	3.42856e+06	3.4551e+06	29.57	3.12764e+06	2.90729e+06	38.9	1.1	0.13	0.505361	0.3	0.809141	0.520855	207.159	596.3	9.9
M207T597	258028	258115	12.23	224716	264540	33.66	1.15	0.2	0.720901	0.14	0.912378	0.934591	207.124	597.4	10
M207T653	349598	329243	54.51	374550	249619	74.65	0.93	-0.1	0.95913	0.02	0.990641	0.0228504	207.102	653.1	10.9
M207T701	1.06133e+06	1.0232e+06	31.56	1.01601e+06	1140694	29.75	1.04	0.06	0.645377	0.19	0.878848	0.235874	207.138	701.1	11.7
M207T749	1.64309e+06	1.2111e+06	61.49	2.46939e+06	2.67845e+06	27.21	0.67	-0.59	0.130381	0.88	0.480121	1.45139	207.174	748.9	12.5
M207T78	5.09346e+07	5.0794e+07	1.95	5.12359e+07	5.10225e+07	1.33	0.99	-0.01	0.441803	0.35	0.769616	0.490725	207.05	78.4	1.3
M207T81	3.48235e+07	2.60205e+07	48.82	2.66989e+07	2.05249e+07	59.7	1.3	0.38	0.328205	0.48	0.69011	0.905019	206.886	81.1	1.4
M207T88	1.95373e+06	1.85019e+06	19.82	1.6856e+06	1.49772e+06	48.21	1.16	0.21	0.130381	0.88	0.480121	0.990096	207.005	88.4	1.5
M207T99	472271	463449	31.9	541700	581876	32.27	0.87	-0.2	0.441803	0.35	0.769616	0.573553	207.106	99.1	1.7
M208T330	5.33527e+06	4.87341e+06	44.61	3.77002e+06	4.29172e+06	37.12	1.42	0.5	0.234499	0.63	0.606344	1.22676	208.133	329.6	5.5
M208T346	869355	722267	69.97	1.04803e+07	9.74988e+06	82.87	0.08	-3.59	0.0104118	1.98	0.169968	1.96199	208.133	346.4	5.8
M208T372	4.1471e+06	4.17552e+06	18.9	4.09204e+06	3.91538e+06	30.34	1.01	0.02	0.798446	0.1	0.941385	0.171657	207.639	371.7	6.2
M208T373	2.55521e+06	2.87965e+06	53.67	1.77216e+06	1.73629e+06	87.89	1.44	0.53	0.382284	0.42	0.730096	0.962792	208.134	372.7	6.2
M208T528	1.39921e+06	1.59938e+06	40.92	1.06831e+06	1.16279e+06	46.45	1.31	0.39	0.234499	0.63	0.606344	0.66547	208.096	527.6	8.8
M208T575	365226	162776	156.71	569148	499049	67.61	0.64	-0.64	0.104895	0.98	0.440144	1.23193	208.19	574.5	9.6
M208T596	425359	488210	43.35	304132	303655	36.31	1.4	0.48	0.234499	0.63	0.606344	0.838979	208.162	596.4	9.9
M208T616_1	920702	830713	60.19	1.59642e+06	1.80473e+06	39.71	0.58	-0.79	0.0206682	1.68	0.228643	1.39211	207.67	616.3	10.3
M208T616_2	347706	291179	41.38	318685	305270	15.79	1.09	0.13	0.878477	0.06	0.967431	0.177667	208.171	616.2	10.3
M208T690	554188	596451	46.57	578353	596368	29.4	0.96	-0.06	1	0	1	0.367897	208.169	689.8	11.5
M208T71	491044	495011	10.48	471888	450568	11.53	1.04	0.06	0.573737	0.24	0.846615	0.653408	207.957	71.4	1.2
M208T72	1.48945e+06	1.47371e+06	10.1	1.40929e+06	1.40007e+06	7.19	1.06	0.08	0.328205	0.48	0.69011	0.956184	207.986	72	1.2
M208T78	4.10282e+06	4.10132e+06	41.65	2.82108e+06	2.69236e+06	35.17	1.45	0.54	0.104895	0.98	0.440144	1.2906	208.054	78.3	1.3
M208T83	841003	844540	11.72	759390	620064	33.51	1.11	0.15	0.234499	0.63	0.606344	0.917906	207.972	82.5	1.4
M208T87	1.27001e+06	1.3529e+06	40.68	1.28232e+06	1.23463e+06	35.21	0.99	-0.01	0.95913	0.02	0.990641	0.190055	208.081	87.4	1.5
M209T130	1.37942e+06	1.16927e+06	38.02	1.49152e+06	1.38297e+06	38.84	0.92	-0.11	0.798446	0.1	0.941385	0.382907	209.092	129.7	2.2
M209T260	2.21321e+06	1963250	52.33	1.16265e+06	1.16651e+06	27.33	1.9	0.93	0.0206682	1.68	0.228643	1.81517	208.992	259.6	4.3
M209T303	403094	428734	92.66	258260	156233	124.27	1.56	0.64	0.382284	0.42	0.730096	0.567148	209.067	303.2	5.1
M209T334	6.02919e+06	5.79474e+06	77.07	3.93774e+06	3.03874e+06	81.65	1.53	0.61	0.278632	0.55	0.649698	0.740337	209.092	333.6	5.6
M209T355	568120	468444	46.99	1.05922e+06	1.11989e+06	29.45	0.54	-0.9	0.00699301	2.16	0.14968	2.10339	209.129	355	5.9
M209T357	8.13985e+06	7.47495e+06	33.49	5.08776e+06	5.49538e+06	26.48	1.6	0.68	0.0281274	1.55	0.261699	1.85386	209.103	356.7	5.9
M209T366	5.7248e+06	5.2989e+06	28.17	2.82629e+06	2.9105e+06	29.17	2.03	1.02	0.0001554	3.81	0.0532196	2.38868	209.128	366.4	6.1
M209T396	3.03881e+07	2.44189e+07	72.57	1.42258e+07	1.50335e+07	36.9	2.14	1.1	0.004662	2.33	0.129379	1.73558	209.137	396.2	6.6
M209T527	464121	393611	38.86	495094	523766	42.81	0.94	-0.09	0.720901	0.14	0.912378	0.0492758	209.128	527	8.8
M209T544	522734	582008	53.28	714676	694516	83.93	0.73	-0.45	0.573737	0.24	0.846615	0.00534996	209.128	544.4	9.1
M209T590	1.33883e+06	1.29874e+06	19.26	1.56685e+06	1.49274e+06	14.34	0.85	-0.23	0.160528	0.79	0.521677	1.29033	209.063	590.2	9.8
M209T642	466166	422688	42.36	528194	477545	31.99	0.88	-0.18	0.505361	0.3	0.809141	0.634827	208.678	642.3	10.7
M209T693	1.00936e+06	504994	91.84	415427	290259	84.01	2.43	1.28	0.0379176	1.42	0.297283	1.4872	209.117	692.9	11.5
M209T792	1.63571e+06	1.62659e+06	63.35	1.83616e+06	1.92399e+06	59.9	0.89	-0.17	0.878477	0.06	0.967431	0.312683	209.154	792.3	13.2
M209T797	1.11239e+06	1.0795e+06	14.89	1.13673e+06	964836	36.81	0.98	-0.03	0.505361	0.3	0.809141	0.114706	209.096	797.4	13.3
M209T81	8.82639e+06	8.96769e+06	59.32	7.3413e+06	6.44086e+06	71.63	1.2	0.27	0.798446	0.1	0.941385	0.26168	208.884	81.1	1.4
M209T810	3.36907e+06	3.41911e+06	37.93	5.45057e+06	5.42651e+06	18.37	0.62	-0.69	0.004662	2.33	0.129379	2.03915	209.19	810.4	13.5
M209T99	1.38326e+06	1.35961e+06	5.75	1.36933e+06	1.38991e+06	7.24	1.01	0.01	0.878477	0.06	0.967431	0.208764	209.103	98.9	1.6
M210T103	9.31708e+06	9.20167e+06	15.95	6.92887e+06	7.10845e+06	26.65	1.34	0.43	0.0104118	1.98	0.169968	1.70224	210.043	102.9	1.7
M210T107	421712	476081	30.66	460650	447717	38.97	0.92	-0.13	0.720901	0.14	0.912378	0.199801	210.098	107.1	1.8
M210T108	826052	880597	24.23	954154	778130	55	0.87	-0.21	1	0	1	0.0846796	210.087	107.8	1.8
M210T112	489461	537282	71.32	624314	603611	91.96	0.78	-0.35	0.720901	0.14	0.912378	0.0776109	210.124	111.9	1.9
M210T137	1.28041e+06	922366	51.99	1.80074e+06	1.69313e+06	38.28	0.71	-0.49	0.194872	0.71	0.56435	1.20012	210.008	136.7	2.3
M210T145	3.5134e+06	3318218	72.7	3.25034e+06	2.92264e+06	64.83	1.08	0.11	1	0	1	0.0619341	210.135	144.7	2.4
M210T309	4.14632e+06	4.06338e+06	18.73	4.86277e+06	4.95698e+06	12.31	0.85	-0.23	0.0498834	1.3	0.330421	1.42208	209.985	308.8	5.1
M210T322	910010	396293	87.94	1.3361e+06	1.02019e+06	80.91	0.68	-0.55	0.505361	0.3	0.809141	0.52077	210.124	321.9	5.4
M210T333	535738	524277	12.73	457730	473269	21.96	1.17	0.23	0.0829837	1.08	0.403171	1.3437	210.096	333.4	5.6
M210T360_2	485354	72744.9	139.21	857278	552323	108.17	0.57	-0.82	0.645377	0.19	0.878848	0.768376	210.197	359.9	6
M210T366	417137	448657	61.33	437646	396984	49.49	0.95	-0.07	1	0	1	0.237224	210.132	366.4	6.1
M210T396	7.4413e+06	4.67137e+06	94.17	4.16707e+06	3.2009e+06	86.81	1.79	0.84	0.328205	0.48	0.69011	0.868509	210.142	396	6.6
M210T485	472131	492933	58.05	736309	743077	20.6	0.64	-0.64	0.0498834	1.3	0.330421	1.60797	210.111	484.9	8.1
M210T597	1.19817e+06	1.25283e+06	44.7	1.09046e+06	1.03859e+06	45.35	1.1	0.14	0.95913	0.02	0.990641	0.347799	210.112	596.9	9.9
M210T720	1.94442e+06	1.96191e+06	47.56	1.34378e+06	1.27531e+06	24.93	1.45	0.53	0.194872	0.71	0.56435	1.14297	210.112	720.3	12
M210T728	2.84288e+06	2.67664e+06	33.2	2.50756e+06	2.25231e+06	35.59	1.13	0.18	0.382284	0.42	0.730096	0.617531	210.185	728.1	12.1
M210T99	821395	727318	29.1	777645	666398	40.94	1.06	0.08	0.382284	0.42	0.730096	0.411917	209.988	99.2	1.7
M211T108	106461	96812.8	23.46	220700	189479	51.36	0.48	-1.05	0.00699301	2.16	0.14968	1.92228	211.071	107.9	1.8
M211T121	8.21162e+06	9.76257e+06	41.3	6.83433e+06	7.69799e+06	53.02	1.2	0.26	0.382284	0.42	0.730096	0.517289	211.119	121.5	2
M211T137	2.93574e+06	1.81565e+06	77.56	3.73543e+06	3.9282e+06	40.05	0.79	-0.35	0.382284	0.42	0.730096	0.868844	211.007	137	2.3
M211T203	703135	705612	51.08	748697	856333	67	0.94	-0.09	0.95913	0.02	0.990641	0.107353	210.992	203	3.4
M211T319	825331	800188	17.19	615926	635712	38.31	1.34	0.42	0.0829837	1.08	0.403171	1.49319	211.107	318.6	5.3
M211T349	732322	851407	60.49	953950	858940	30.48	0.77	-0.38	0.573737	0.24	0.846615	1.20641	210.597	348.9	5.8
M211T360	85600.4	83957.5	33.24	101195	110021	41.7	0.85	-0.24	0.278632	0.55	0.649698	0.398211	211.174	359.9	6
M211T406	728749	703377	21.89	558388	532816	71.27	1.31	0.38	0.573737	0.24	0.846615	1.20059	211.107	405.9	6.8
M211T417	3.11514e+06	2.34404e+06	93.52	2.37335e+06	2.17046e+06	69.08	1.31	0.39	0.95913	0.02	0.990641	0.242942	211.107	417.4	7
M211T421	672622	675279	25.24	879802	822460	28.95	0.76	-0.39	0.104895	0.98	0.440144	1.39677	211.06	421.4	7
M211T495	3.1504e+06	3.28829e+06	50.52	4.82275e+06	5.33836e+06	36	0.65	-0.61	0.0829837	1.08	0.403171	1.35443	211.144	495.1	8.3
M211T512	2.52006e+06	2.45571e+06	59.09	4.02053e+06	3.87345e+06	97.13	0.63	-0.67	0.573737	0.24	0.846615	0.393937	211.144	512.5	8.5
M211T565	649960	653650	25.73	494445	418988	41.18	1.31	0.39	0.104895	0.98	0.440144	1.31928	210.547	565.1	9.4
M211T605	2.51618e+06	3.07348e+06	40.73	2.21113e+06	2.17151e+06	38.34	1.14	0.19	0.505361	0.3	0.809141	0.252061	211.133	605.3	10.1
M211T614	1.47264e+06	1.58034e+06	29.81	1.25121e+06	1.24452e+06	34.96	1.18	0.24	0.160528	0.79	0.521677	0.765954	211.169	614	10.2
M211T622	522430	482490	39.01	420029	435599	35.1	1.24	0.31	0.328205	0.48	0.69011	1.05152	211.107	622.2	10.4
M211T744	3.49556e+07	3.31232e+07	10.76	2.70024e+07	2.4482e+07	41.23	1.29	0.37	0.234499	0.63	0.606344	1.39939	211.169	744.2	12.4
M211T755	3.31961e+06	2.99345e+06	43.31	3.84101e+06	3.96216e+06	36.03	0.86	-0.21	0.505361	0.3	0.809141	0.562365	211.144	754.7	12.6
M211T78	1.51053e+06	1.49862e+06	24.98	1.38673e+06	1.40027e+06	14.75	1.09	0.12	0.573737	0.24	0.846615	0.504478	211.142	77.9	1.3
M211T812	1.2859e+06	1.3561e+06	23.63	1.00698e+06	1.0164e+06	21.74	1.28	0.35	0.0649573	1.19	0.368412	1.29038	211.133	812.1	13.5
M212T113	1.77974e+07	2.26833e+07	58	1.73138e+07	2.2526e+07	59.21	1.03	0.04	0.505361	0.3	0.809141	0.169042	212.139	113	1.9
M212T114	4.43847e+06	3.20285e+06	81.17	6.86123e+06	5.6611e+06	88.78	0.65	-0.63	0.278632	0.55	0.649698	0.830624	212.102	113.8	1.9
M212T136	4.88049e+07	5.10061e+07	15.71	2.45133e+07	2.22404e+07	45.39	1.99	0.99	0.000621601	3.21	0.069967	2.26518	212.003	136.5	2.3
M212T354	5.59702e+06	5.6699e+06	21.34	3.20963e+06	3.37033e+06	35.79	1.74	0.8	0.0018648	2.73	0.096514	2.08715	212.149	353.5	5.9
M212T377	2.98058e+06	2.60735e+06	77.35	2.01736e+06	2.21631e+06	63.45	1.48	0.56	0.328205	0.48	0.69011	0.730283	212.103	376.5	6.3
M212T427	3.02468e+06	1.35413e+06	92.5	2.81769e+06	2.805e+06	68.98	1.07	0.1	0.878477	0.06	0.967431	0.0383564	212.092	427.5	7.1
M212T465	511408	354857	66.23	329277	283623	40.1	1.55	0.64	0.234499	0.63	0.606344	0.925252	212.092	465.4	7.8
M212T506	3.58835e+06	3.53944e+06	17.09	4.2594e+06	4.29184e+06	25.67	0.84	-0.25	0.194872	0.71	0.56435	0.98053	212.165	505.6	8.4
M212T533	1.53117e+06	1.27673e+06	63.72	741470	697465	59.41	2.07	1.05	0.0649573	1.19	0.368412	1.58098	212.091	532.8	8.9
M212T542	288542	310288	57.95	210893	147897	92.34	1.37	0.45	0.328205	0.48	0.69011	0.867579	212.143	542.2	9
M212T549	1.13411e+06	1.01841e+06	47.89	1.48652e+06	1.51099e+06	52.02	0.76	-0.39	0.441803	0.35	0.769616	0.617072	212.165	548.7	9.1
M212T643	7.06449e+06	8.15596e+06	49.42	1.11658e+07	1.23446e+07	44.85	0.63	-0.66	0.0829837	1.08	0.403171	1.1573	212.165	642.5	10.7
M212T669	9.6266e+06	8.50281e+06	37.09	1.32778e+07	8.48182e+06	72.02	0.73	-0.46	0.878477	0.06	0.967431	0.22998	212.165	669.2	11.2
M212T701	323003	330065	25.38	235520	212359	30.65	1.37	0.46	0.0649573	1.19	0.368412	1.50048	212.02	700.8	11.7
M212T744	2.85322e+06	2.82193e+06	39.84	2.72353e+06	2.23463e+06	50.79	1.05	0.07	0.798446	0.1	0.941385	0.258109	212.172	744.1	12.4
M212T91_1	68244.8	67317.1	42.99	227358	112990	139.42	0.3	-1.74	0.0206682	1.68	0.228643	1.5842	212.043	90.7	1.5
M213T108	3.98807e+06	3.97997e+06	25.83	2.5326e+06	2.6774e+06	27.43	1.57	0.66	0.00699301	2.16	0.14968	1.79198	213.123	108.5	1.8
M213T111	781190	812913	42.95	653222	649911	57.59	1.2	0.26	0.382284	0.42	0.730096	0.0743164	213.087	111	1.9
M213T115	708842	806553	32.24	734771	746504	20.35	0.96	-0.05	0.798446	0.1	0.941385	0.422643	212.971	114.7	1.9
M213T137	646045	691064	31.13	749434	681383	49.24	0.86	-0.21	0.95913	0.02	0.990641	0.246608	213.007	137	2.3
M213T146	6.75921e+06	6.7667e+06	5.19	6.7595e+06	6.68073e+06	9.17	1	0	0.720901	0.14	0.912378	0.0380184	213.123	146.5	2.4
M213T179	1.47056e+07	1.75933e+07	54.91	1.61971e+07	2.01848e+07	49.55	0.91	-0.14	0.798446	0.1	0.941385	0.168658	212.988	178.8	3
M213T203	1.19353e+07	1.27033e+07	19.52	1.01885e+07	1.00779e+07	20.75	1.17	0.23	0.234499	0.63	0.606344	1.16596	212.988	203	3.4
M213T309	2.60972e+06	2.37884e+06	43.1	5.10466e+06	4.84752e+06	44.55	0.51	-0.97	0.00699301	2.16	0.14968	1.82083	212.987	309	5.2
M213T377	1.01159e+06	881638	54.87	402140	476236	46.27	2.52	1.33	0.0003108	3.51	0.0568482	2.08797	212.987	376.8	6.3
M213T382	1.53315e+06	1.32665e+06	97.25	1.8113e+06	756063	115.59	0.85	-0.24	0.95913	0.02	0.990641	0.500621	213.113	381.9	6.4
M213T457	716710	663981	63.58	493280	416820	44.45	1.45	0.54	0.441803	0.35	0.769616	0.789188	213.023	457.3	7.6
M213T548	571229	621640	37.57	488162	540239	26.71	1.17	0.23	0.234499	0.63	0.606344	0.420709	213.16	547.7	9.1
M213T643	633444	556888	40.89	897636	861505	39.67	0.71	-0.5	0.130381	0.88	0.480121	1.27372	213.168	642.5	10.7
M213T698	3.01959e+06	3.19327e+06	38.35	3.19148e+06	3.33741e+06	33.16	0.95	-0.08	0.798446	0.1	0.941385	0.0949198	213.148	697.7	11.6
M213T705	1.45883e+06	1.49732e+06	16.6	1.13263e+06	1.07277e+06	29.84	1.29	0.37	0.0829837	1.08	0.403171	1.4959	213.102	705.2	11.8
M213T72	2.7544e+06	2.79135e+06	15.32	2.33042e+06	1.9264e+06	40.27	1.18	0.24	0.104895	0.98	0.440144	1.18231	212.936	71.9	1.2
M213T76	1.4587e+06	958550	83.32	1.73647e+06	1.53693e+06	29.96	0.84	-0.25	0.160528	0.79	0.521677	1.02682	213.098	76	1.3
M213T82_1	2.91687e+07	2.86337e+07	17.72	3.38869e+07	3.65619e+07	37.87	0.86	-0.22	0.441803	0.35	0.769616	0.376155	212.851	82.1	1.4
M213T82_2	2.59051e+07	1.52954e+07	103.47	4.39476e+07	3.7032e+07	36.56	0.59	-0.76	0.0649573	1.19	0.368412	1.74177	213.075	82.4	1.4
M213T91	1.16603e+06	1.17466e+06	6.09	1.3193e+06	1.29412e+06	14.78	0.88	-0.18	0.104895	0.98	0.440144	1.43396	213.016	90.7	1.5
M214T105	435953	230526	89.69	373829	212363	85.15	1.17	0.22	0.234499	0.63	0.606344	0.290459	214.038	105.3	1.8
M214T115	771439	710867	52.21	600212	576049	56.76	1.29	0.36	0.573737	0.24	0.846615	0.624793	213.97	114.5	1.9
M214T137	1.2139e+06	1.20201e+06	20.49	1.45993e+06	1.34632e+06	26.67	0.83	-0.27	0.382284	0.42	0.730096	1.03301	214.001	137	2.3
M214T384	974827	973547	10.8	838972	831896	13.51	1.16	0.22	0.0379176	1.42	0.297283	1.60862	214.107	384.4	6.4
M214T412	1.04107e+06	1.05455e+06	26.76	755009	699507	32.59	1.38	0.46	0.0498834	1.3	0.330421	1.58805	214.107	411.8	6.9
M214T464	453542	437061	41.04	470883	486003	36.6	0.96	-0.05	0.95913	0.02	0.990641	0.202514	214.18	464.2	7.7
M214T530	9.52109e+06	7.85724e+06	51.84	8.61008e+06	6.56933e+06	63.63	1.11	0.15	0.720901	0.14	0.912378	0.495619	214.107	530.1	8.8
M214T570	5.03903e+07	5.44876e+07	32.92	4.94719e+07	5.10573e+07	20.55	1.02	0.03	0.573737	0.24	0.846615	0.0532026	214.123	570.2	9.5
M214T573	3.32874e+06	3.57258e+06	41.31	1.78726e+06	1.5185e+06	87.55	1.86	0.9	0.0649573	1.19	0.368412	1.53396	214.196	573.2	9.6
M214T598	1.96417e+07	1.34335e+07	66.77	1.85943e+07	2.16315e+07	32.77	1.06	0.08	0.878477	0.06	0.967431	0.241007	214.123	597.8	10
M214T619	294202	289573	38.65	282453	242614	47.27	1.04	0.06	0.878477	0.06	0.967431	0.234134	213.637	619.1	10.3
M214T62	4.56454e+06	4.56059e+06	6.78	4.48096e+06	4.62725e+06	10.54	1.02	0.03	0.798446	0.1	0.941385	0.376813	214.001	61.6	1
M214T704	4.04449e+07	4.41952e+07	30.2	3.32964e+07	3.04828e+07	39.04	1.21	0.28	0.382284	0.42	0.730096	0.82058	214.18	704.5	11.7
M214T705	31923.9	32279.8	33.11	32467.5	28877.5	28.34	0.98	-0.02	0.798446	0.1	0.941385	0.161988	214.106	705.2	11.8
M214T774	2.97703e+07	2.75389e+07	22.15	2.43823e+07	2.50381e+07	37.26	1.22	0.29	0.278632	0.55	0.649698	1.16783	214.253	773.7	12.9
M214T789	1.80194e+07	2.02669e+07	28.24	1.21204e+07	1.02118e+07	55.94	1.49	0.57	0.0829837	1.08	0.403171	1.36224	214.253	789.4	13.2
M214T83	1.38961e+06	1.4561e+06	21.69	1.42146e+06	1.4959e+06	19.56	0.98	-0.03	0.95913	0.02	0.990641	0.21242	214.078	82.7	1.4
M214T96	1.91519e+07	2.00585e+07	22.39	1.16706e+07	1.0766e+07	21.32	1.64	0.71	0.004662	2.33	0.129379	2.15104	214.051	96.4	1.6
M215T114_1	9.58646e+06	9.94123e+06	26.57	1.02249e+07	1.01189e+07	12.66	0.94	-0.09	0.798446	0.1	0.941385	0.523368	214.966	114.5	1.9
M215T114_2	2.9922e+06	2.66775e+06	68.55	6.18526e+06	6.61567e+06	69.4	0.48	-1.05	0.194872	0.71	0.56435	1.04333	215.102	113.6	1.9
M215T122	3.61723e+07	3.65284e+07	34.49	3.59017e+07	3.85856e+07	22.98	1.01	0.01	0.878477	0.06	0.967431	0.237082	215.139	122.5	2
M215T124	3.57411e+06	2.60877e+06	79.5	2.94361e+06	2.74808e+06	48.84	1.21	0.28	0.95913	0.02	0.990641	0.172189	215.003	124.2	2.1
M215T127	575638	362888	63.85	670401	412436	67.31	0.86	-0.22	0.328205	0.48	0.69011	0.473767	214.518	127.1	2.1
M215T137	8.39423e+06	7.99459e+06	18.2	6.85486e+06	6.63095e+06	23.76	1.22	0.29	0.160528	0.79	0.521677	1.45226	215.003	137.1	2.3
M215T164	4.70587e+06	4.01834e+06	86.63	4.54766e+06	5.44886e+06	66.57	1.03	0.05	1	0	1	0.194627	215.139	163.7	2.7
M215T326	4.08139e+06	2.67023e+06	68.73	3.93761e+06	2.97284e+06	58.07	1.04	0.05	0.441803	0.35	0.769616	0.108618	215.048	326.1	5.4
M215T333	2.05519e+06	2.16719e+06	16.94	2.68611e+06	2.72138e+06	33.5	0.77	-0.39	0.0649573	1.19	0.368412	1.17354	215.139	332.6	5.5
M215T530	1.03077e+06	1.00423e+06	43.99	666367	660044	42.8	1.55	0.63	0.0829837	1.08	0.403171	1.19279	215.111	530.1	8.8
M215T570	9.64227e+06	9.83705e+06	23.14	7.7879e+06	8.04268e+06	29.5	1.24	0.31	0.194872	0.71	0.56435	1.21246	215.126	570.1	9.5
M215T573	1.15455e+06	1.05273e+06	28.47	1.81326e+06	1.98388e+06	23.09	0.64	-0.65	0.004662	2.33	0.129379	1.94222	214.53	573.1	9.6
M215T598	2.57541e+06	2.40922e+06	43.44	2.60192e+06	2.39967e+06	43.77	0.99	-0.01	0.95913	0.02	0.990641	0.0273491	215.126	597.7	10
M215T704_1	2.29968e+06	1.96636e+06	60.21	2.5988e+06	2.5846e+06	47.83	0.88	-0.18	0.720901	0.14	0.912378	0.35698	215.165	704.1	11.7
M215T704_2	5.42508e+06	5.32409e+06	25.44	4.24178e+06	3.62391e+06	45.27	1.28	0.35	0.104895	0.98	0.440144	1.21468	215.184	704.3	11.7
M215T722	811625	784612	38.57	542321	539002	23.8	1.5	0.58	0.0379176	1.42	0.297283	1.47917	215.164	722.4	12
M215T76	7.28245e+06	7.56987e+06	32.27	4.31223e+06	4.24604e+06	38.06	1.69	0.76	0.014763	1.83	0.200021	1.71656	215.087	75.7	1.3
M215T774	3.89489e+06	3.66704e+06	34.64	3.35024e+06	3.35699e+06	31.92	1.16	0.22	0.441803	0.35	0.769616	0.601761	215.256	773.7	12.9
M215T82	7.85592e+06	6.13071e+06	65.65	3.37594e+06	3.27678e+06	24.14	2.33	1.22	0.000621601	3.21	0.069967	2.13324	214.85	82.1	1.4
M215T86	7.17333e+07	6.95596e+07	15.27	9.17234e+07	8.45929e+07	32.25	0.78	-0.35	0.278632	0.55	0.649698	1.25869	215.069	86	1.4
M215T91	817971	803195	11.25	842203	855729	11.83	0.97	-0.04	0.505361	0.3	0.809141	0.378674	215.043	90.8	1.5
M216T108	2.06079e+07	1.97981e+07	46	1.86783e+07	1.33738e+07	64.97	1.1	0.14	0.573737	0.24	0.846615	0.47002	216.098	107.6	1.8
M216T109	1.36906e+06	751877	87.28	2.43382e+06	2.58906e+06	51.28	0.56	-0.83	0.104895	0.98	0.440144	1.30266	216.122	109.2	1.8
M216T116	5.13654e+06	5.21652e+06	40.53	7.93089e+06	7.78974e+06	36.74	0.65	-0.63	0.0379176	1.42	0.297283	1.33439	216.087	115.9	1.9
M216T124	1.54937e+06	279354	125.99	1.30211e+06	89374.4	142.65	1.19	0.25	0.160528	0.79	0.521677	0.750546	216.142	123.7	2.1
M216T326	165797	166057	11.79	168744	171325	7.33	0.98	-0.03	0.645377	0.19	0.878848	0.234843	216.052	325.6	5.4
M216T334	294485	220331	50.8	320455	216895	61.79	0.92	-0.12	0.95913	0.02	0.990641	0.0781995	216.196	334.1	5.6
M216T364	1.15843e+06	1.47189e+06	57.76	851844	944593	65.91	1.36	0.44	0.104895	0.98	0.440144	0.52718	216.123	363.9	6.1
M216T368	1.71152e+06	1.65706e+06	43.19	1.26178e+06	1.01265e+06	61.07	1.36	0.44	0.328205	0.48	0.69011	1.07641	216.087	368.1	6.1
M216T408	1.39043e+06	1.11124e+06	61.65	2419478	1.2139e+06	94.29	0.57	-0.8	0.382284	0.42	0.730096	0.824726	216.087	408.2	6.8
M216T570	463128	490230	43.37	350473	380733	28.65	1.32	0.4	0.130381	0.88	0.480121	0.95009	216.129	569.9	9.5
M216T592	578479	518605	23.55	403183	245633	97.39	1.43	0.52	0.104895	0.98	0.440144	1.50692	216.196	592.3	9.9
M216T593	3.20703e+06	3.61761e+06	28.8	4.12093e+06	4.05349e+06	17.83	0.78	-0.36	0.0379176	1.42	0.297283	1.39426	216.159	592.6	9.9
M216T608	131535	142526	41.82	258169	249414	22.71	0.51	-0.97	0.000621601	3.21	0.069967	2.21066	216.069	608.4	10.1
M216T618	8.29169e+06	7.6971e+06	37.49	7.77161e+06	7.65421e+06	31.84	1.07	0.09	0.720901	0.14	0.912378	0.129516	216.102	618.2	10.3
M216T626	856728	792994	22.42	547050	475653	65.89	1.57	0.65	0.0498834	1.3	0.330421	1.51487	215.587	626.3	10.4
M216T655	2.20463e+07	2.14886e+07	27.51	2.06363e+07	2.02512e+07	32.34	1.07	0.1	0.878477	0.06	0.967431	0.382224	216.196	655.4	10.9
M216T699	4.59432e+06	4.55754e+06	18.71	3.048e+06	3.25547e+06	48.6	1.51	0.59	0.0498834	1.3	0.330421	1.60769	216.159	698.9	11.6
M216T712	87151.6	76536.4	35.14	77748.5	81214.3	40.61	1.12	0.16	0.798446	0.1	0.941385	0.513171	216.102	711.9	11.9
M216T72	1.96815e+06	1.96966e+06	10.42	2.31436e+06	2.24071e+06	18.18	0.85	-0.23	0.0649573	1.19	0.368412	1.42448	215.994	72.2	1.2
M216T76	747356	865116	36.54	787803	851154	48.69	0.95	-0.08	0.505361	0.3	0.809141	0.0220437	216.09	75.6	1.3
M216T799	1.26395e+06	1.18174e+06	45.64	1.31834e+06	1.29901e+06	27.54	0.96	-0.06	0.878477	0.06	0.967431	0.402195	216.138	798.8	13.3
M216T85	5.80143e+06	5.51221e+06	20.22	6.59176e+06	6.4788e+06	9.81	0.88	-0.18	0.0649573	1.19	0.368412	1.37275	216.063	85.3	1.4
M216T86	2.71616e+06	2.48121e+06	32.61	3.56542e+06	3.72842e+06	30.58	0.76	-0.39	0.0829837	1.08	0.403171	1.06586	216.074	86	1.4
M217T108	2.1003e+06	2.02228e+06	13.13	2.45497e+06	2.43533e+06	19.94	0.86	-0.23	0.104895	0.98	0.440144	1.21007	217.102	107.6	1.8
M217T109	7.4311e+06	8.17214e+06	37.29	8.97506e+06	9.9092e+06	34.38	0.83	-0.27	0.130381	0.88	0.480121	0.543938	217.064	109.2	1.8
M217T114	628001	602943	19.3	727934	644432	30.32	0.86	-0.21	0.573737	0.24	0.846615	0.82365	216.963	114.4	1.9
M217T118	526057	181551	137.21	344083	157317	142.9	1.53	0.61	0.382284	0.42	0.730096	0.796767	217.102	117.9	2
M217T323	857114	778016	34.95	881062	897536	25.66	0.97	-0.04	0.645377	0.19	0.878848	0.162852	217.154	322.8	5.4
M217T354	1.57511e+07	1.42912e+07	31.75	1.45637e+07	1.40772e+07	28.46	1.08	0.11	0.573737	0.24	0.846615	0.424468	217.105	353.5	5.9
M217T368	487813	443120	39.95	762365	733144	50.63	0.64	-0.64	0.130381	0.88	0.480121	0.992692	217.09	368.1	6.1
M217T440	623417	621640	21.66	861245	889745	20.68	0.72	-0.47	0.0206682	1.68	0.228643	1.81806	217.097	440.2	7.3
M217T517	2.56629e+07	2.29917e+07	77.08	3.6502e+07	40711584	44.71	0.7	-0.51	0.328205	0.48	0.69011	0.774214	217.191	516.8	8.6
M217T557	2.38166e+07	2.62091e+07	36.45	1.39002e+07	1.53442e+07	51.23	1.71	0.78	0.0498834	1.3	0.330421	1.55039	217.107	557.4	9.3
M217T592	253892	218776	46.69	296701	268590	53.4	0.86	-0.22	0.720901	0.14	0.912378	0.301497	217.162	592.5	9.9
M217T618	2.85011e+06	2.90047e+06	30.3	2.96498e+06	3.05135e+06	18.27	0.96	-0.06	0.878477	0.06	0.967431	0.488333	217.105	618.2	10.3
M217T655	4.45451e+06	4.35568e+06	34.76	3.00434e+06	2.34744e+06	53.24	1.48	0.57	0.0281274	1.55	0.261699	1.51646	217.199	655.5	10.9
M217T699	287991	187764	77.7	109990	101853	52.36	2.62	1.39	0.0498834	1.3	0.330421	1.43166	217.163	698.8	11.6
M217T72	1.02521e+07	1.06435e+07	13.1	1.05394e+07	1.09976e+07	31.4	0.97	-0.04	0.798446	0.1	0.941385	0.0608694	216.95	72	1.2
M217T727	1.72805e+06	1.74319e+06	15.72	1.4253e+06	1.45818e+06	30	1.21	0.28	0.0829837	1.08	0.403171	1.25299	217.122	727	12.1
M217T728	495389	476542	13.38	453261	411287	32.41	1.09	0.13	0.573737	0.24	0.846615	0.780267	217.143	728	12.1
M217T740	1.38572e+06	1.26953e+06	44.35	1.0008e+06	951308	30.35	1.38	0.47	0.278632	0.55	0.649698	1.11357	217.159	740.1	12.3
M217T748	5.4556e+06	5.43599e+06	15.55	4.61032e+06	4.46415e+06	24.72	1.18	0.24	0.130381	0.88	0.480121	1.27282	217.122	747.6	12.5
M217T76	782829	765655	20.36	763361	777585	22.43	1.03	0.04	0.878477	0.06	0.967431	0.157817	217.085	75.6	1.3
M217T786	1.00192e+07	9.87105e+06	36.2	8.23681e+06	7.9654e+06	38.52	1.22	0.28	0.441803	0.35	0.769616	0.715408	217.122	786.5	13.1
M217T86	5.55039e+06	5.40788e+06	11.22	3.90175e+06	3.76893e+06	17.73	1.42	0.51	0.000621601	3.21	0.069967	2.38982	217.065	85.9	1.4
M217T98	654974	711416	43.67	1.12394e+06	1.2257e+06	67.24	0.58	-0.78	0.382284	0.42	0.730096	0.58083	217.082	98.1	1.6
M218T104	6.37106e+06	7.12164e+06	41.12	8.66495e+06	8.85026e+06	37.18	0.74	-0.44	0.130381	0.88	0.480121	1.07815	218.113	104.2	1.7
M218T109	612540	568869	22.81	581417	550395	20.2	1.05	0.08	0.573737	0.24	0.846615	0.448933	218.067	109	1.8
M218T113	867182	816354	38.19	1.78281e+06	1.81448e+06	39.15	0.49	-1.04	0.014763	1.83	0.200021	2.01254	218.122	113.3	1.9
M218T121	6.05619e+07	4.58725e+07	52.37	8.38097e+07	6.35553e+07	54.15	0.72	-0.47	0.160528	0.79	0.521677	0.976312	218.102	121.2	2
M218T122	1.25509e+07	1.44497e+07	30.52	1.263e+07	1.18956e+07	37.8	0.99	-0.01	0.645377	0.19	0.878848	0.0196036	218.139	121.9	2
M218T236	7.00621e+07	5.87671e+07	98.56	5.69151e+07	1.53805e+07	116.42	1.23	0.3	0.878477	0.06	0.967431	0.390968	218.139	236.2	3.9
M218T253	4.34842e+07	4.2652e+07	11.5	4.63636e+07	4.80733e+07	9.98	0.94	-0.09	0.441803	0.35	0.769616	0.822287	218.139	253.1	4.2
M218T277	5.77593e+07	5.30779e+07	42.83	6.62487e+07	5.44929e+07	46.81	0.87	-0.2	0.720901	0.14	0.912378	0.508834	218.139	277.5	4.6
M218T353	1.16196e+06	985006	32.72	1.06119e+06	900932	54.41	1.09	0.13	0.382284	0.42	0.730096	0.62376	218.109	353.3	5.9
M218T422	486538	472502	38.62	402077	437750	37.47	1.21	0.28	0.573737	0.24	0.846615	0.51479	218.084	421.9	7
M218T423	511563	512209	21.29	621152	625812	56.17	0.82	-0.28	0.441803	0.35	0.769616	0.0115356	218.048	423.2	7.1
M218T517	1.96166e+06	1.70699e+06	66.56	2.47777e+06	2.81073e+06	52.23	0.79	-0.34	0.505361	0.3	0.809141	0.291588	218.194	516.9	8.6
M218T575	3.0387e+07	3.02406e+07	49.35	3.79197e+07	4.31482e+07	51.21	0.8	-0.32	0.382284	0.42	0.730096	0.420745	218.211	575.5	9.6
M218T589	2.51553e+06	2.85059e+06	57.82	2.00591e+06	2.33763e+06	46.47	1.25	0.33	0.328205	0.48	0.69011	0.0518897	218.211	589.5	9.8
M218T646	169771	181199	29.85	146267	138031	47.29	1.16	0.21	0.278632	0.55	0.649698	0.76746	218.175	646.4	10.8
M218T69	1.18161e+06	877136	67.17	1.05903e+06	1.03148e+06	54.37	1.12	0.16	0.798446	0.1	0.941385	0.043849	218.186	69.2	1.2
M218T786	1.16646e+06	1.19551e+06	26.28	1.06461e+06	974277	35.42	1.1	0.13	0.382284	0.42	0.730096	0.529977	218.125	786.5	13.1
M218T83	1.4672e+06	1.40499e+06	26.71	1.94145e+06	1.85626e+06	35.72	0.76	-0.4	0.160528	0.79	0.521677	1.20022	217.938	82.8	1.4
M219T102	898653	882964	15.42	733449	817177	27.9	1.23	0.29	0.104895	0.98	0.440144	1.10886	219.061	101.7	1.7
M219T104	621026	592164	14.95	611713	637144	15.21	1.02	0.02	0.95913	0.02	0.990641	0.231294	219.117	104.2	1.7
M219T113	5.94976e+06	6.41254e+06	19.15	3.37707e+06	3.31734e+06	39.13	1.76	0.82	0.0029526	2.53	0.116769	2.09708	219.134	112.7	1.9
M219T122	9.90681e+06	1.03833e+07	55.89	6.69051e+06	4.88418e+06	80.38	1.48	0.57	0.278632	0.55	0.649698	0.817804	219.097	121.6	2
M219T139	1.0095e+06	836824	61.34	1.19977e+06	894563	49.59	0.84	-0.25	0.278632	0.55	0.649698	0.773323	219.097	139.3	2.3
M219T277	8.75332e+06	7.63842e+06	35.06	8.69534e+06	9.12122e+06	18.96	1.01	0.01	0.798446	0.1	0.941385	0.0554094	219.142	277.1	4.6
M219T354	1.28062e+06	1.48017e+06	41.16	1.31378e+06	1.35601e+06	52.87	0.97	-0.04	0.878477	0.06	0.967431	0.210793	219.134	353.5	5.9
M219T475	569172	672963	43.23	728811	727661	21.35	0.78	-0.36	0.234499	0.63	0.606344	1.13909	219.113	475.3	7.9
M219T573_1	298544	285368	20.97	301729	261376	44.09	0.99	-0.02	0.645377	0.19	0.878848	0.182136	219.065	572.9	9.5
M219T573_2	1.05555e+06	1.03779e+06	27.45	1.10248e+06	1.123e+06	20.5	0.96	-0.06	1	0	1	0.412811	219.138	573.1	9.6
M219T575	4.41834e+06	4.18203e+06	41.26	2.66849e+06	2.54353e+06	52.29	1.66	0.73	0.0649573	1.19	0.368412	1.53942	219.215	575.5	9.6
M219T64	1.19506e+06	877710	53.36	1.33694e+06	996470	108.39	0.89	-0.16	0.95913	0.02	0.990641	0.249773	219.174	64	1.1
M219T658	2.51334e+06	1.01197e+06	113.63	1.92626e+06	917457	111.96	1.3	0.38	0.382284	0.42	0.730096	0.324777	219.174	657.9	11
M219T691	7.45598e+06	7.05694e+06	32.72	7.06603e+06	6.32838e+06	51.06	1.06	0.08	0.573737	0.24	0.846615	0.485456	219.174	691.1	11.5
M219T72	1.54188e+07	1.47119e+07	28.94	1.4606e+07	1.48707e+07	29.8	1.06	0.08	0.95913	0.02	0.990641	0.359631	218.983	71.7	1.2
M219T740	3.28371e+06	2.91513e+06	59.7	2.60915e+06	2.89647e+06	36.92	1.26	0.33	0.798446	0.1	0.941385	0.461495	219.138	740.2	12.3
M219T749	1.38317e+06	1.74185e+06	51.15	1.1867e+06	988478	68.51	1.17	0.22	0.441803	0.35	0.769616	0.4621	219.138	749	12.5
M219T767	758747	669456	54.04	358882	343072	55.76	2.11	1.08	0.00699301	2.16	0.14968	1.76733	219.095	767.4	12.8
M219T792	2.03687e+06	2.19697e+06	37.17	1.83212e+06	2.05711e+06	40.3	1.11	0.15	0.720901	0.14	0.912378	0.414883	219.138	791.7	13.2
M219T816	2.88546e+06	2.66912e+06	30.41	3.10035e+06	3.52672e+06	41.97	0.93	-0.1	0.573737	0.24	0.846615	0.0389883	219.174	816	13.6
M219T82	1.14835e+07	8.02159e+06	82.36	4.75973e+06	4.75074e+06	22.09	2.41	1.27	0.004662	2.33	0.129379	1.85374	219.083	82.1	1.4
M219T88	2.1959e+06	2.18607e+06	8.63	1.78036e+06	1.73374e+06	16.51	1.23	0.3	0.00699301	2.16	0.14968	2.01713	219.005	88.5	1.5
M220T102	2.47631e+07	2.6155e+07	10.77	2.50004e+07	2.52795e+07	21.65	0.99	-0.01	0.573737	0.24	0.846615	0.0695753	220.118	102	1.7
M220T112	7.24418e+06	7.2555e+06	34.7	2.29722e+06	1.63138e+06	102.48	3.15	1.66	0.004662	2.33	0.129379	1.97462	220.129	112.4	1.9
M220T223	1.98229e+06	1.84748e+06	71.64	1.84857e+06	1.16469e+06	100.69	1.07	0.1	0.505361	0.3	0.809141	0.517136	220.082	222.7	3.7
M220T356_1	457723	419605	41.91	612872	638914	43.37	0.75	-0.42	0.328205	0.48	0.69011	1.01815	219.925	356.4	5.9
M220T356_2	1.96873e+09	1.95392e+09	14.4	1.79308e+09	1.98475e+09	44.18	1.1	0.13	1	0	1	0.762538	220.118	356.4	5.9
M220T356_3	749958	682257	27.73	681387	649999	27.85	1.1	0.14	0.573737	0.24	0.846615	0.579598	220.311	356.4	5.9
M220T368	213578	213772	16.86	245561	255272	10.2	0.87	-0.2	0.0829837	1.08	0.403171	1.44763	220.17	368.5	6.1
M220T429	1.01355e+06	1.11223e+06	59.08	818651	907994	53.21	1.24	0.31	0.645377	0.19	0.878848	0.250564	220.064	429.4	7.2
M220T487	161077	159543	26.65	409496	353209	63.38	0.39	-1.35	0.00699301	2.16	0.14968	1.85599	220.064	486.7	8.1
M220T533	4.56026e+06	4.0451e+06	27.28	2.41292e+06	2.02649e+06	41.75	1.89	0.92	0.0018648	2.73	0.096514	2.12628	220.097	533.1	8.9
M220T555	1.28428e+07	1.39258e+07	47.27	8.279e+06	6.01012e+06	44.4	1.55	0.63	0.160528	0.79	0.521677	1.28897	220.136	554.8	9.2
M220T612	307397	296625	29.71	293816	228259	48.74	1.05	0.07	0.645377	0.19	0.878848	0.387756	220.131	611.5	10.2
M220T691	1.14907e+06	955936	33.04	631750	620429	57.9	1.82	0.86	0.004662	2.33	0.129379	1.70399	220.177	691.1	11.5
M220T72	4.29486e+06	4.21432e+06	15.18	4.31759e+06	3.93832e+06	39.51	0.99	-0.01	0.160528	0.79	0.521677	0.214986	219.984	71.8	1.2
M220T91	949214	917752	19.81	525797	583672	39.56	1.81	0.85	0.000621601	3.21	0.069967	1.8434	220.025	90.8	1.5
M220T99	1.42394e+07	1.39243e+07	43.44	1.2068e+07	1.19297e+07	34.27	1.18	0.24	0.328205	0.48	0.69011	0.267282	220.081	98.6	1.6
M221T102	1.12679e+06	646369	108.01	710621	246188	132.57	1.59	0.67	0.194872	0.71	0.56435	0.837659	221.114	102.2	1.7
M221T110	1.47314e+07	1.397e+07	38.06	1.21941e+07	1.23323e+07	47.29	1.21	0.27	0.573737	0.24	0.846615	0.830825	221.059	109.8	1.8
M221T114	980943	969519	31.61	1.728e+06	1.66536e+06	36.23	0.57	-0.82	0.0104118	1.98	0.169968	1.8782	221.013	114.3	1.9
M221T121	1.3155e+07	1.06764e+07	97.32	2.25418e+07	2.06202e+07	62.06	0.58	-0.78	0.160528	0.79	0.521677	1.31662	221.059	120.9	2
M221T246	1.64458e+06	1.60624e+06	10.23	1.64713e+06	1.64886e+06	5.75	1	0	0.798446	0.1	0.941385	0.0322989	221.092	245.6	4.1
M221T289	150913	164507	48.28	85229.1	68842.2	63.87	1.77	0.82	0.0829837	1.08	0.403171	1.40373	221.067	288.7	4.8
M221T347	3.9844e+06	1.79046e+06	128.5	2.68852e+06	2.09474e+06	79.74	1.48	0.57	0.95913	0.02	0.990641	0.130147	221.092	347.4	5.8
M221T356	2.07582e+08	222242226	17.36	1.9518e+08	2.01861e+08	13.73	1.06	0.09	0.278632	0.55	0.649698	0.636989	221.121	356.4	5.9
M221T378	1.83044e+06	1.72433e+06	13.35	1.24322e+06	1.21643e+06	30.42	1.47	0.56	0.004662	2.33	0.129379	1.96366	221.09	377.6	6.3
M221T388	2.9182e+07	3.40007e+07	47.88	3.74614e+07	4.15751e+07	30.35	0.78	-0.36	0.0829837	1.08	0.403171	0.86847	221.17	387.9	6.5
M221T394	1.08229e+06	1.08056e+06	17.33	1.48276e+06	1.41145e+06	23.08	0.73	-0.45	0.014763	1.83	0.200021	1.85949	221.103	394.1	6.6
M221T397	2.36873e+06	2.19995e+06	22.3	2.5293e+06	2.08724e+06	53.05	0.94	-0.09	0.573737	0.24	0.846615	0.0018375	221.092	397.4	6.6
M221T533	281675	297512	27.7	261526	280491	39.13	1.08	0.11	0.798446	0.1	0.941385	0.419303	221.101	533	8.9
M221T593	1.27146e+07	1.19482e+07	50.22	9.80008e+06	6.57555e+06	66	1.3	0.38	0.382284	0.42	0.730096	0.908563	221.174	592.8	9.9
M221T708	519490	496122	51.08	276772	105896	133.09	1.88	0.91	0.0649573	1.19	0.368412	1.60731	221.074	707.9	11.8
M221T749	1.4478e+06	1.34222e+06	27.33	1.49095e+06	1.38353e+06	40.81	0.97	-0.04	0.878477	0.06	0.967431	0.14447	221.117	749.2	12.5
M221T774	899053	738377	56.5	710798	826792	48.18	1.26	0.34	0.645377	0.19	0.878848	0.614631	221.154	773.9	12.9
M222T101_1	325961	293259	51.8	500592	485632	9.24	0.65	-0.62	0.0498834	1.3	0.330421	1.83261	222.079	100.5	1.7
M222T101_2	3.28865e+06	2.79207e+06	39.51	2.98962e+06	2.30664e+06	58.44	1.1	0.14	0.194872	0.71	0.56435	0.546052	222.113	101	1.7
M222T110	1.52755e+07	1.51973e+07	23.28	1.73936e+07	1.70094e+07	13.76	0.88	-0.19	0.328205	0.48	0.69011	1.10456	222.043	109.6	1.8
M222T122	1.94827e+07	1.87231e+07	22.91	2.09122e+07	2.05903e+07	12.48	0.93	-0.1	0.441803	0.35	0.769616	0.770903	222.043	122.1	2
M222T302	83720.4	44297.7	142.77	343233	240650	94.02	0.24	-2.04	0.0018648	2.73	0.096514	1.7356	222.123	301.5	5
M222T315	227446	213650	47.84	264441	251626	62.59	0.86	-0.22	0.328205	0.48	0.69011	0.137035	222.043	314.5	5.2
M222T335	5.47705e+07	5.2892e+07	13.24	3.22391e+07	3.49158e+07	66.57	1.7	0.76	0.0379176	1.42	0.297283	1.66061	222.112	334.6	5.6
M222T347	2.4381e+06	2.37614e+06	35.13	1.23239e+06	1.30469e+06	57.85	1.98	0.98	0.0206682	1.68	0.228643	1.68214	222.095	347.4	5.8
M222T356	2.00765e+07	1.42083e+07	58.1	1.89677e+07	1.59805e+07	48.38	1.06	0.08	0.798446	0.1	0.941385	0.00710901	222.123	356.4	5.9
M222T376	1.17503e+07	1.27492e+07	29.91	1.1468e+07	1.20752e+07	25.43	1.02	0.04	0.720901	0.14	0.912378	0.00543843	222.112	376.4	6.3
M222T388_1	1.14436e+07	1.17281e+07	24.75	7.38424e+06	8.05933e+06	37.83	1.55	0.63	0.0206682	1.68	0.228643	1.49484	221.671	387.9	6.5
M222T424	5.09079e+06	5.02645e+06	43.95	4.80716e+06	4.25777e+06	35.89	1.06	0.08	0.95913	0.02	0.990641	0.215824	222.149	424.5	7.1
M222T432	1.24523e+06	869462	68.96	681092	623441	42.06	1.83	0.87	0.130381	0.88	0.480121	1.33705	222.079	432.3	7.2
M222T473	1.37259e+06	1.32812e+06	29.37	1.59901e+06	1.40207e+06	40.18	0.86	-0.22	0.573737	0.24	0.846615	0.591376	222.149	473.4	7.9
M222T555	708080	614729	37.34	595027	403990	74.34	1.19	0.25	0.194872	0.71	0.56435	0.887471	222.132	554.7	9.2
M222T571	519847	408067	68.96	535891	462598	45.96	0.97	-0.04	0.645377	0.19	0.878848	0.302082	222.16	570.7	9.5
M222T593	3.11351e+06	3.19533e+06	22.27	2.92679e+06	2.72971e+06	26.84	1.06	0.09	0.573737	0.24	0.846615	0.475466	222.178	592.6	9.9
M222T619	748896	726318	46.22	659279	630490	47.13	1.14	0.18	0.720901	0.14	0.912378	0.486651	222.15	618.7	10.3
M222T621	1.21256e+08	1.16648e+08	38.06	1.52399e+08	1.46218e+08	43.39	0.8	-0.33	0.328205	0.48	0.69011	0.704643	222.185	621.4	10.4
M222T674	589802	490633	50.02	302709	303417	58.55	1.95	0.96	0.0829837	1.08	0.403171	1.54696	222.076	673.9	11.2
M222T677	660622	832206	47.75	397308	275646	75.59	1.66	0.73	0.0498834	1.3	0.330421	1.28259	221.685	677	11.3
M222T737	1.03358e+06	1.03157e+06	39.32	957761	918393	53.27	1.08	0.11	0.720901	0.14	0.912378	0.371575	222.17	737.4	12.3
M222T83	2.89345e+07	2.89998e+07	10.59	3.32478e+07	3.17891e+07	24.42	0.87	-0.2	0.278632	0.55	0.649698	0.886198	222.029	83.4	1.4
M222T91	1.47349e+07	1.47483e+07	2.75	1.54036e+07	1.55281e+07	2.79	0.96	-0.06	0.004662	2.33	0.129379	1.87198	222.097	91	1.5
M222T98	1.7055e+07	1.66422e+07	27.33	1.72024e+07	1.49349e+07	31.12	0.99	-0.01	0.95913	0.02	0.990641	0.00111105	222.054	98.3	1.6
M223T104_1	594814	564871	38.76	639502	691076	52.08	0.93	-0.1	0.720901	0.14	0.912378	0.0594923	222.998	103.6	1.7
M223T104_2	916409	908827	19.11	915787	963993	15.71	1	0	1	0	1	0.0179259	223.075	104.1	1.7
M223T113	2.70869e+06	2.5288e+06	22	1.50439e+06	1.45633e+06	62.28	1.8	0.85	0.014763	1.83	0.200021	1.55253	223.116	113	1.9
M223T127	6.94867e+06	7.18872e+06	12.17	5.21591e+06	5.45582e+06	33.45	1.33	0.41	0.0104118	1.98	0.169968	1.40751	222.504	126.8	2.1
M223T309	2.19806e+06	1.40824e+06	102.03	1.9887e+06	1.82807e+06	52.4	1.11	0.14	0.505361	0.3	0.809141	0.437922	222.971	308.8	5.1
M223T33	1.65532e+06	1.63596e+06	11.63	1.64765e+06	1.64517e+06	11.97	1	0.01	0.878477	0.06	0.967431	0.0530354	222.903	33.2	0.6
M223T356	1.74925e+06	1.78953e+06	13.45	1.42885e+06	1.31915e+06	17.03	1.22	0.29	0.014763	1.83	0.200021	1.73992	223.125	356.4	5.9
M223T361	300217	313279	62.18	372586	205650	150.78	0.81	-0.31	0.505361	0.3	0.809141	0.615415	223.082	360.8	6
M223T376	1.12283e+06	1.1955e+06	32.92	1.06869e+06	942102	67.06	1.05	0.07	0.798446	0.1	0.941385	0.676877	223.116	376.3	6.3
M223T395	4.47485e+06	3.99661e+06	29.13	1.92117e+06	1.5588e+06	101.73	2.33	1.22	0.0104118	1.98	0.169968	1.67746	223.107	395.3	6.6
M223T439	8.38282e+06	9.38721e+06	35.81	1.50315e+07	1.34017e+07	48.57	0.56	-0.84	0.0379176	1.42	0.297283	1.63501	223.154	439.2	7.3
M223T61	2.40734e+06	1.37361e+06	94.41	1.65767e+06	1.42455e+06	68.42	1.45	0.54	0.382284	0.42	0.730096	0.553717	222.903	61.5	1
M223T621	1.86072e+07	1.39812e+07	72.44	1.97984e+07	1.6472e+07	55.82	0.94	-0.09	0.645377	0.19	0.878848	0.311474	223.188	621.4	10.4
M223T712	2.20102e+06	2.01862e+06	36.4	2.60386e+06	2.04108e+06	54.4	0.85	-0.24	0.95913	0.02	0.990641	0.29406	223.133	711.5	11.9
M223T719	3.58602e+06	3.09343e+06	28.5	3.80338e+06	3.30561e+06	28.61	0.94	-0.08	0.382284	0.42	0.730096	0.342886	223.133	719	12
M223T72	1.76068e+06	1.55636e+06	30.41	1.2055e+06	1.23523e+06	45.75	1.46	0.55	0.130381	0.88	0.480121	1.23591	222.92	71.8	1.2
M223T739	1.10385e+06	1.03857e+06	35.99	898175	732147	61.72	1.23	0.3	0.382284	0.42	0.730096	0.891085	223.096	738.9	12.3
M223T759	2.43647e+07	2.15755e+07	50	2.58291e+07	1.86728e+07	58.03	0.94	-0.08	0.95913	0.02	0.990641	0.0105896	223.064	758.7	12.6
M223T768	1.2112e+06	1.26381e+06	34.12	1.30088e+06	1.18583e+06	46	0.93	-0.1	0.798446	0.1	0.941385	0.0214873	223.133	767.8	12.8
M223T785	690381	659640	63.2	577041	546265	38.14	1.2	0.26	0.798446	0.1	0.941385	0.0449775	223.096	784.9	13.1
M223T79	1.42495e+07	1.19673e+07	26.49	1.21092e+07	1.19801e+07	12.33	1.18	0.23	0.382284	0.42	0.730096	1.13048	223.024	78.9	1.3
M224T101	1.7566e+07	1.60085e+07	36.12	1.83512e+07	1.54283e+07	60.86	0.96	-0.06	0.720901	0.14	0.912378	0.0454406	224.127	100.9	1.7
M224T114	2.43678e+07	2.45696e+07	6.22	2.49713e+07	2.56108e+07	6.74	0.98	-0.04	0.328205	0.48	0.69011	0.469307	224.128	114.1	1.9
M224T151	2.75644e+06	2.8275e+06	31.12	3.4259e+06	2.84374e+06	62.61	0.8	-0.31	0.645377	0.19	0.878848	0.160569	224.039	151.3	2.5
M224T281	5.52684e+07	5.73928e+07	17.96	65608698	6.25847e+07	15.37	0.84	-0.25	0.130381	0.88	0.480121	1.38624	224.128	281	4.7
M224T302	700409	735160	27.46	675573	668821	17.21	1.04	0.05	0.573737	0.24	0.846615	0.139848	224.185	302.1	5
M224T320	3.32036e+06	3.22529e+06	14.65	3.30079e+06	3.4666e+06	15.1	1.01	0.01	0.878477	0.06	0.967431	0.0431897	224.078	320.2	5.3
M224T329	895151	996207	48.62	956189	990729	24.18	0.94	-0.1	0.95913	0.02	0.990641	0.484155	224.078	329.1	5.5
M224T348	1.016e+06	84980.7	173.88	1.03114e+06	62708.9	178.4	0.99	-0.02	0.505361	0.3	0.809141	0.371893	224.092	347.7	5.8
M224T356	3.21211e+06	3.35403e+06	45.82	1.83855e+06	1.72852e+06	49.69	1.75	0.8	0.0281274	1.55	0.261699	1.34695	224.078	356.1	5.9
M224T363	472139	411730	48.05	490851	462439	48.09	0.96	-0.06	1	0	1	0.137351	224.111	363.3	6.1
M224T372	686459	740695	24.71	498300	429682	44.54	1.38	0.46	0.0498834	1.3	0.330421	1.29725	224.149	372	6.2
M224T39	9.57036e+06	7.52453e+06	66.43	9.26098e+06	7.53022e+06	62.36	1.03	0.05	0.878477	0.06	0.967431	0.00114605	224.126	38.6	0.6
M224T409	344189	254432	77.29	545604	589777	61.85	0.63	-0.66	0.278632	0.55	0.649698	0.874907	224.091	409.3	6.8
M224T415	852991	814455	27.26	697609	706811	35.44	1.22	0.29	0.234499	0.63	0.606344	1.03856	224.185	414.9	6.9
M224T428	801835	804634	8.76	770012	745904	16.53	1.04	0.06	0.278632	0.55	0.649698	0.576626	224.091	428	7.1
M224T439	966342	1.00509e+06	31.43	894363	927831	26.32	1.08	0.11	0.645377	0.19	0.878848	0.184703	224.157	439.2	7.3
M224T491	223995	239297	18.46	247361	242939	20.75	0.91	-0.14	0.505361	0.3	0.809141	0.690989	224.074	491.1	8.2
M224T576	9.04897e+06	9.30584e+06	65.6	5.16316e+06	4.57457e+06	79.85	1.75	0.81	0.160528	0.79	0.521677	1.15424	224.124	576.1	9.6
M224T582	743595	519114	63.1	219787	72430.8	114.49	3.38	1.76	0.014763	1.83	0.200021	1.96603	224.047	581.9	9.7
M224T594	374001	368086	36.12	381183	355475	30.95	0.98	-0.03	0.878477	0.06	0.967431	0.190903	224.164	594.2	9.9
M224T596	706353	700237	10.25	851471	849527	46.95	0.83	-0.27	0.645377	0.19	0.878848	0.361096	224.185	596.4	9.9
M224T60	2.81873e+06	1.21508e+06	96.81	1.99675e+06	2.19117e+06	54	1.41	0.5	0.878477	0.06	0.967431	0.1102	223.902	60.4	1
M224T621	1.64041e+06	1767217	64.8	1.04614e+06	991378	37.61	1.57	0.65	0.382284	0.42	0.730096	0.629737	224.192	621.4	10.4
M224T64	4.21794e+07	3.99604e+07	54	2.85217e+07	2.10572e+07	95.49	1.48	0.56	0.234499	0.63	0.606344	0.968726	224.126	64	1.1
M224T705	1.2372e+06	1.30531e+06	36.1	1.77292e+06	1.35696e+06	55.54	0.7	-0.52	0.382284	0.42	0.730096	0.934685	224.091	705.1	11.8
M224T712	6.37288e+06	6.38443e+06	36.48	4.52405e+06	3.99388e+06	55.1	1.41	0.49	0.130381	0.88	0.480121	1.22768	224.135	711.6	11.9
M224T72	4.68639e+07	4.6825e+07	20.35	4.80287e+07	4.87808e+07	12.47	0.98	-0.04	1	0	1	0.360363	223.991	71.6	1.2
M224T759	5.17829e+06	4.01411e+06	49.84	5.78963e+06	4.39256e+06	81.43	0.89	-0.16	0.798446	0.1	0.941385	0.187026	224.063	758.7	12.6
M224T769	7.33585e+06	6.85446e+06	27.1	7.67071e+06	7.26598e+06	34.9	0.96	-0.06	0.720901	0.14	0.912378	0.102287	224.128	768.8	12.8
M224T804	2.79543e+08	2.79397e+08	31.87	3.03428e+08	3.08437e+08	28.83	0.92	-0.12	0.505361	0.3	0.809141	0.393728	223.989	803.5	13.4
M224T83	1.47294e+06	1.81452e+06	64.9	1.95411e+06	2.15333e+06	41.39	0.75	-0.41	0.505361	0.3	0.809141	0.754768	223.946	82.5	1.4
M224T838	4.88035e+07	5.0185e+07	30.61	3.56838e+07	3.138e+07	52.71	1.37	0.45	0.194872	0.71	0.56435	1.23212	223.988	838.3	14
M224T86	2.67344e+06	1.31343e+06	107.45	1.32236e+07	5.76385e+06	98.33	0.2	-2.31	0.0829837	1.08	0.403171	1.68628	223.999	86.4	1.4
M224T99_1	227069	113483	147.09	1.29058e+06	1.11815e+06	88.9	0.18	-2.51	0.014763	1.83	0.200021	1.83996	224.05	98.5	1.6
M224T99_2	7.14565e+07	7.18921e+07	11.06	5.18373e+07	5.94981e+07	53.47	1.38	0.46	0.328205	0.48	0.69011	1.3761	224.113	99.2	1.7
M225T102	2.61173e+06	2.70559e+06	29.33	2.03642e+06	2.19081e+06	52.8	1.28	0.36	0.505361	0.3	0.809141	0.944097	225.131	101.6	1.7
M225T106	760904	682186	31.81	543541	506955	39.87	1.4	0.49	0.130381	0.88	0.480121	1.31115	224.56	106.4	1.8
M225T109	2.93555e+06	3.06619e+06	28.42	2.74751e+06	2.88031e+06	39.81	1.07	0.1	0.878477	0.06	0.967431	0.424562	224.927	108.7	1.8
M225T281	1.69956e+06	872767	108.15	3.42202e+06	4.33892e+06	70.52	0.5	-1.01	0.234499	0.63	0.606344	0.91502	225.128	281.2	4.7
M225T287	5.1154e+06	4.79318e+06	20.34	4.90852e+06	5.06741e+06	24.66	1.04	0.06	0.878477	0.06	0.967431	0.391657	224.899	287.4	4.8
M225T308	2.2875e+06	2.16196e+06	14.77	2.48054e+06	2.15713e+06	26.97	0.92	-0.12	0.798446	0.1	0.941385	0.444807	224.988	308.3	5.1
M225T344	925624	841821	48.55	917613	964610	39.31	1.01	0.01	0.798446	0.1	0.941385	0.069264	225.196	343.9	5.7
M225T377	1.34973e+06	1.27166e+06	47.07	872950	804035	29.04	1.55	0.63	0.0498834	1.3	0.330421	1.41398	225.087	377.3	6.3
M225T413	1.06397e+07	1.11067e+07	43.4	1.134e+07	1.14005e+07	36.37	0.94	-0.09	1	0	1	0.420961	225.124	413.3	6.9
M225T470	391280	261524	71.47	368112	359994	36.63	1.06	0.09	0.573737	0.24	0.846615	0.114257	225.076	469.9	7.8
M225T552	601345	513026	46.18	413420	378535	46	1.45	0.54	0.160528	0.79	0.521677	1.14043	225.06	551.7	9.2
M225T602	358971	391852	36.39	316074	277773	47.92	1.14	0.18	0.441803	0.35	0.769616	0.547259	225.16	602.5	10
M225T62	1.74055e+07	1.6239e+07	17.11	1.67168e+07	1.7302e+07	11.86	1.04	0.06	1	0	1	0.34852	224.897	61.7	1
M225T626	401475	407622	20.5	315234	335463	26.56	1.27	0.35	0.014763	1.83	0.200021	1.32275	224.593	626.2	10.4
M225T701	1.22983e+06	1.24661e+06	16.7	1.10322e+06	1.02682e+06	18.36	1.11	0.16	0.160528	0.79	0.521677	0.912443	225.112	701.1	11.7
M225T72	7.82949e+06	8.47341e+06	31.75	9.83219e+06	1.04191e+07	48.77	0.8	-0.33	0.382284	0.42	0.730096	0.204631	224.989	71.7	1.2
M225T724	1.51205e+06	1.25143e+06	39.89	798217	761125	53.7	1.89	0.92	0.014763	1.83	0.200021	1.67021	225.148	724	12.1
M225T739	397003	381272	45.09	332080	312272	47.1	1.2	0.26	0.441803	0.35	0.769616	0.581904	225.196	739.1	12.3
M225T749	792722	852682	28.73	634261	479403	69.81	1.25	0.32	0.194872	0.71	0.56435	1.08667	225.185	748.8	12.5
M225T759	5.07906e+06	4.8426e+06	66.89	4.1667e+06	2.61955e+06	86.45	1.22	0.29	0.382284	0.42	0.730096	0.687189	225.06	758.7	12.6
M225T763	3.91801e+06	3.44945e+06	47.16	3.98784e+06	3.83374e+06	36.13	0.98	-0.03	0.95913	0.02	0.990641	0.180254	225.196	762.6	12.7
M225T767	3.83505e+06	3.80108e+06	44.4	2.06503e+06	1.855e+06	70.75	1.86	0.89	0.0649573	1.19	0.368412	1.62132	225.148	767.4	12.8
M225T79	1.42115e+06	1.42829e+06	10.28	1.67432e+06	1.64852e+06	16.64	0.85	-0.24	0.0829837	1.08	0.403171	1.55544	225.023	78.7	1.3
[truncated: 14,097 more rows]
