# Supplementary material for: The impact of dapagliflozin for the myocardial metabolomic profiles of mice with chronic heart failure induced by a high fat diet
Source: Research Square preprint supplement (doi:10.21203/rs.3.rs-6881055/v1), 2025-06-25
Supplement: Supplementary file 13 [file d013a5ef5285640cfa42dd90.xlsx]

## Sheet: Table S17
Pathway_id	Pathway_name	Hits	P value	-Log10(Pvalue)	Holm adjust	FDR	Impact	Compounds	Pathway	Links
Choline metabolism in cancer	11	2	0.0011367	6.7796	0.61496	0.47444	0.18182	C00157;C04230	map05231	http://www.kegg.jp/pathway/map05231+C00157+C04230
Glycerophospholipid metabolism	52	3	0.0017539	6.3459	0.94712	0.47444	0.057692	C00157;C00350;C04230	map00564	http://www.kegg.jp/pathway/map00564+C00157+C00350+C04230
Retrograde endocannabinoid signaling	19	2	0.0034529	5.6685	1	0.62268	0.10526	C00157;C00350	map04723	http://www.kegg.jp/pathway/map04723+C00157+C00350
Autophagy - other	3	1	0.013998	4.2688	1	1	0.33333	C00350	map04136	http://www.kegg.jp/pathway/map04136+C00350
Autophagy - yeast	3	1	0.013998	4.2688	1	1	0.33333	C00350	map04138	http://www.kegg.jp/pathway/map04138+C00350
Pathogenic Escherichia coli infection	3	1	0.013998	4.2688	1	1	0.33333	C00350	map05130	http://www.kegg.jp/pathway/map05130+C00350
Glycosylphosphatidylinositol (GPI)-anchor biosynthesis	3	1	0.013998	4.2688	1	1	0.33333	C00350	map00563	http://www.kegg.jp/pathway/map00563+C00350
Kaposi sarcoma-associated herpesvirus infection	5	1	0.023225	3.7625	1	1	0.2	C00350	map05167	http://www.kegg.jp/pathway/map05167+C00350
Autophagy - animal	6	1	0.027807	3.5825	1	1	0.16667	C00350	map04140	http://www.kegg.jp/pathway/map04140+C00350
Linoleic acid metabolism	28	1	0.12352	2.0914	1	1	0.035714	C00157	map00591	http://www.kegg.jp/pathway/map00591+C00157
alpha-Linolenic acid metabolism	44	1	0.18734	1.6748	1	1	0.022727	C00157	map00592	http://www.kegg.jp/pathway/map00592+C00157
Arachidonic acid metabolism	75	1	0.29848	1.2091	1	1	0.013333	C00157	map00590	http://www.kegg.jp/pathway/map00590+C00157
Biosynthesis of secondary metabolites	2072	2	0.99989	0.00011102	1	1	0.00096525	C00157;C00350	map01110	http://www.kegg.jp/pathway/map01110+C00157+C00350
Metabolic pathways	2827	2	1	4.96e-07	1	1	0.00070746	C00157;C00350	map01100	http://www.kegg.jp/pathway/map01100+C00157+C00350
