# Supplementary material for: The impact of dapagliflozin for the myocardial metabolomic profiles of mice with chronic heart failure induced by a high fat diet
Source: Research Square preprint supplement (doi:10.21203/rs.3.rs-6881055/v1), 2025-06-25
Supplement: Supplementary file 14 [file d261fb31e764f17828421e08.xlsx]

## Sheet: DEM
Accession	Chow1	Chow2	Chow3	Chow4	Chow5	Chow6	Chow7	Chow8	HDF1	HDF2	HDF3	HDF4	HDF5	HDF6	HDF7	HDF8	HDF_Mean	HDF_Median	HDF_RSD	Chow_Mean	Chow_Median	Chow_RSD	FC	log2FC	P.value	-log10(P.value)	FDR	VIP	Mass-to-charge ratio	Retention indices	Retention times(min)	Regulation
M100T343	4.2657e+06	602750	2.1928e+06	7.09583e+06	2.26015e+06	2.0245e+06	2.21375e+06	7.51918e+06	8.96531e+06	6.52917e+06	5.56269e+06	2.48335e+06	1.14558e+07	2.66258e+06	2.55072e+06	1.15972e+07	6.47586e+06	6.04593e+06	59.51	3.52183e+06	2.23695e+06	72.1	1.84	0.88	0.0498834	1.3	0.201689	1.1299	100.076	343.1	5.7	Up
M101T72	2.62891e+06	2.47279e+06	3.0816e+06	794556	2.36848e+06	2.12794e+06	2.893e+06	2.92274e+06	3.51171e+06	3.32357e+06	3.31942e+06	3.77122e+06	3.10089e+06	3.35045e+06	3.33735e+06	4.05398e+06	3.47107e+06	3.3439e+06	8.75	2.41125e+06	2.55085e+06	30.11	1.44	0.53	0.0001554	3.81	0.00610078	1.47926	101.025	71.7	1.2	Up
M102T89	3.9296e+06	3.42342e+06	3.85139e+06	3.35441e+06	3.24606e+06	3.33966e+06	3.87129e+06	3.72594e+06	3.264e+06	3.44202e+06	3.01669e+06	3.28273e+06	3.54395e+06	3.24359e+06	2.90048e+06	3.14156e+06	3.22938e+06	3.25379e+06	6.51	3.59272e+06	3.57468e+06	7.77	0.9	-0.15	0.0206682	1.68	0.117429	1.55123	102.091	89.5	1.5	Down
M103T72	3.75811e+06	3.50826e+06	3.70763e+06	2.94613e+06	3.23763e+06	3.73405e+06	3.92273e+06	4.07887e+06	2.6741e+06	779508	2.43111e+06	6.32496e+06	2.12678e+06	2.34646e+06	1.23996e+06	2.29451e+06	2.52717e+06	2.32049e+06	65.9	3.61168e+06	3.72084e+06	10.22	0.7	-0.52	0.0104118	1.98	0.0771942	1.35047	102.97	72.1	1.2	Down
M104T418	137919	186320	141628	199756	121445	133621	260657	237901	268141	215709	265862	207049	255241	229359	208001	280282	241205	242300	12.26	177406	163974	29.41	1.36	0.44	0.014763	1.83	0.0952789	1.56126	104.053	417.9	7	Up
M104T86	3.9607e+08	1.14059e+09	1.21045e+09	3.56659e+08	1.20832e+09	1.02186e+09	1.22955e+09	1.20357e+09	1.34219e+09	1.30468e+09	1.50368e+09	1.59087e+09	1.3649e+09	1.22964e+09	1.30358e+09	1.49168e+09	1.3914e+09	1.35354e+09	8.88	9.70884e+08	1.17208e+09	38.42	1.43	0.52	0.0001554	3.81	0.00610078	1.37633	104.107	85.6	1.4	Up
M104T89	1.45028e+08	2.11366e+08	1.55007e+08	2.02258e+08	2.04329e+08	7.55633e+07	1.45666e+08	1.23261e+08	1.30489e+08	4.54488e+07	1.37416e+08	1.53448e+08	1.27511e+08	4.02951e+07	4.48976e+07	6.84799e+07	9.34982e+07	9.79952e+07	51.41	1.5781e+08	1.50337e+08	29.61	0.59	-0.76	0.0206682	1.68	0.117429	1.44721	104.07	88.8	1.5	Down
M104T99	3.40839e+07	3.23174e+07	2.13846e+07	6.01172e+07	2.15064e+07	2.3839e+07	2.21643e+07	3.79705e+07	1.61095e+07	2.95223e+07	2.05922e+07	2.27111e+07	1.51318e+07	2.66988e+07	2.16831e+07	1.6906e+07	2.11693e+07	2.11377e+07	24.19	3.16729e+07	2.80782e+07	41.61	0.67	-0.58	0.0498834	1.3	0.201689	1.34108	104.107	99.3	1.7	Down
M105T86	6.33069e+06	2.17484e+07	4.94949e+07	6.00318e+07	1.19159e+07	3.02419e+06	2.84288e+07	1.0194e+08	2.35948e+08	6.49575e+06	9.02691e+07	1.35777e+08	2.03362e+08	8.50197e+07	1.52292e+07	1.61086e+08	1.16648e+08	1.13023e+08	71.14	3.53643e+07	2.50886e+07	95.07	3.3	1.72	0.0498834	1.3	0.201689	1.14318	105.11	85.6	1.4	Up
M105T89	5.88941e+06	5.07563e+06	5.51834e+06	5.50248e+06	6.34984e+06	4.97869e+06	5.68026e+06	5.07038e+06	3.99902e+06	4.7273e+06	3.729e+06	4.38768e+06	4.61205e+06	4.58431e+06	4.82836e+06	4.39512e+06	4.40785e+06	4.48972e+06	8.49	5.50813e+06	5.51041e+06	8.52	0.8	-0.32	0.0001554	3.81	0.00610078	2.00945	105.074	88.8	1.5	Down
M106T468	71436.7	21502.1	9250.49	245426	47199.4	25868.2	23652.2	16692.8	147920	568605	482116	210805	172987	217329	406209	169051	296878	214067	55.16	57628.4	24760.2	136.08	5.15	2.37	0.0029526	2.53	0.0361958	2.00285	106.086	468.1	7.8	Up
M108T115	1.34331e+06	930684	650951	1.36619e+06	313859	63314.1	1.00481e+06	1.10516e+06	2.06976e+06	2.91029e+06	1.66216e+06	1.38976e+06	2.30149e+06	1.16616e+06	995247	3.05776e+06	1.94408e+06	1.86596e+06	39.89	847286	967749	55.56	2.29	1.2	0.004662	2.33	0.0475536	1.41439	107.505	114.5	1.9	Up
M109T89	3.39767e+06	3.45842e+06	3.36829e+06	2.88254e+06	3.88717e+06	3.14102e+06	3.14244e+06	3.02447e+06	1.94219e+06	2.36548e+06	1.74419e+06	2.85594e+06	2.49642e+06	2.68453e+06	2.5823e+06	2.65107e+06	2.41527e+06	2.53936e+06	15.91	3.28775e+06	3.25537e+06	9.5	0.73	-0.44	0.0001554	3.81	0.00610078	1.935	109.028	88.8	1.5	Down
M110T811	1.12771e+08	1.43936e+08	1.39991e+08	1.05188e+08	2.8884e+08	4.60889e+08	1.16552e+08	5.66407e+07	3.21771e+07	2.42955e+07	6.61953e+07	6.76041e+07	4.1019e+07	1.13333e+08	1.32666e+08	1.44024e+07	6.14615e+07	5.36071e+07	69.28	1.78101e+08	1.28272e+08	74.42	0.35	-1.53	0.014763	1.83	0.0952789	1.58015	110.02	811.1	13.5	Down
M111T801	8.6497e+08	8.46161e+08	1.2753e+09	1.02916e+09	1.68819e+09	1.36558e+09	1.03011e+09	1.82602e+09	1.38298e+09	3.40833e+09	1.17496e+09	1.47046e+09	1.27907e+09	1.46918e+09	1.89712e+09	3.48469e+09	1.94585e+09	1.46982e+09	48.82	1.24069e+09	1.15271e+09	29.62	1.57	0.65	0.0498834	1.3	0.201689	1.29619	111.019	801.1	13.4	Up
M112T104	1.90984e+06	1.56036e+06	1.36443e+06	1.92648e+06	969300	786564	1.74151e+06	1.84418e+06	2.53936e+06	2.34275e+06	2.18347e+06	2.16546e+06	2.50838e+06	1.85708e+06	1.79988e+06	2.88145e+06	2.28473e+06	2.26311e+06	15.84	1.51283e+06	1.65094e+06	28.9	1.51	0.59	0.0029526	2.53	0.0361958	1.64102	112.076	103.6	1.7	Up
M112T814	1.99016e+07	1.15377e+07	2.25112e+07	2.15806e+07	1.62963e+07	1.97285e+07	3.28837e+07	2.6956e+07	6.78012e+07	8.27652e+07	2.31599e+07	3.45881e+07	2.42243e+07	6.42764e+07	5.91012e+07	5.23313e+07	5.10309e+07	5.57162e+07	42.52	2.14245e+07	2.07411e+07	30.16	2.38	1.25	0.0018648	2.73	0.0275628	1.82414	111.522	814	13.6	Up
M113T115	1.68629e+06	1.98605e+06	1.82331e+06	1.9977e+06	2.66352e+06	2.62273e+06	4.5666e+06	3.78288e+06	135441	1.18835e+06	212116	826941	1.00252e+06	179395	94429.4	609987	531148	411052	81.78	2.64114e+06	2.31022e+06	39.02	0.2	-2.31	0.0001554	3.81	0.00610078	2.01172	113.071	114.7	1.9	Down
M113T118	4.62949e+07	2.12564e+07	3.17115e+07	5.21826e+06	3.27348e+07	2.24048e+07	4.27017e+07	3.50309e+07	2.53688e+06	1.76374e+06	1.97973e+06	5.11254e+06	1.73388e+07	2.76004e+07	1.83531e+06	2.43528e+07	1.0315e+07	3.82471e+06	106.66	2.96692e+07	3.22231e+07	44.31	0.35	-1.52	0.00699301	2.16	0.0602244	1.57668	113.054	118	2	Down
M113T724	496411	747757	811950	741300	1.40658e+06	1.87794e+06	1.03682e+06	886487	379642	345010	343240	357377	411381	333779	775555	167257	389155	351193	44.22	1.00065e+06	849219	44.21	0.39	-1.36	0.0010878	2.96	0.0203124	1.8913	113.06	723.8	12.1	Down
M113T73	87287.7	1.03194e+06	1.15028e+06	327838	680867	98878	424530	594687	825446	389657	1.17858e+06	1.63335e+06	1.39841e+06	890764	875345	1.29277e+06	1.06054e+06	1.03467e+06	37.01	549539	509608	71.95	1.93	0.95	0.0281274	1.55	0.141969	1.33474	113.09	73.1	1.2	Up
M113T89_1	9.34604e+07	8.31903e+07	1.50407e+08	9.0606e+07	1.31584e+08	1.47071e+08	2.04664e+08	1.16909e+08	4.61328e+07	1.95194e+07	4.4146e+07	6.51128e+07	5.19434e+07	3.75136e+07	2.70724e+07	4.05628e+07	4.15004e+07	4.23544e+07	34.12	1.27236e+08	1.24247e+08	31.82	0.33	-1.62	0.0001554	3.81	0.00610078	2.16357	113	89.1	1.5	Down
M114T108	2.15238e+06	6.78869e+06	4.46009e+06	4.57558e+06	7.83569e+06	2.82267e+06	5.42427e+06	3.73791e+06	9.34093e+06	1.11277e+07	1.72073e+07	1.06488e+07	6.14056e+06	5.03913e+06	5.59411e+06	7.4456e+06	9.06801e+06	8.39326e+06	44.22	4.72466e+06	4.51784e+06	40.58	1.92	0.94	0.0104118	1.98	0.0771942	1.57982	114.091	107.6	1.8	Up
M114T121	1.79172e+06	1.21752e+06	1.90346e+06	544502	1.98473e+06	1.83593e+06	7.13553e+06	1.23881e+06	1.50628e+07	1.80527e+07	1.15026e+07	3.24471e+06	4.77386e+06	1.25464e+07	1.53154e+07	1.04971e+07	1.13744e+07	1.20245e+07	45.26	2.20652e+06	1.81382e+06	92.91	5.15	2.37	0.000621601	3.21	0.0140919	2.04825	114.055	121.4	2	Up
M114T130	1.91272e+08	1.36746e+08	2.41746e+08	1.79261e+08	1.85633e+08	2.08882e+08	2.82769e+08	2.00077e+08	6.28401e+07	7.95791e+06	4.64009e+07	8.22264e+06	9.33449e+06	2.81616e+07	3.98945e+07	6.9464e+06	2.62198e+07	1.8748e+07	82.22	2.03298e+08	1.95674e+08	21.44	0.13	-2.95	0.0001554	3.81	0.00610078	2.19213	114.065	129.9	2.2	Down
M114T143	3.69673e+07	4.9473e+07	3.77804e+07	8.25294e+07	3.83375e+07	3.7998e+07	5.16578e+07	5.64584e+07	7.02442e+07	7.13614e+07	1.10938e+08	7.65577e+07	7.47134e+07	6.1264e+07	6.60145e+07	6.8979e+07	7.50091e+07	7.08028e+07	20.38	4.89002e+07	4.39052e+07	31.8	1.53	0.62	0.00699301	2.16	0.0602244	1.77149	114.065	143.4	2.4	Up
M114T165	4.8904e+07	2.73524e+07	3.72878e+07	4.34419e+07	4.06565e+07	2.72624e+07	3.34908e+07	2.93846e+07	4.3998e+07	4.61187e+07	3.91682e+07	4.30311e+07	4.47083e+07	4.72984e+07	5.24321e+07	4.93398e+07	4.57618e+07	4.54135e+07	8.85	3.59725e+07	3.53893e+07	22.2	1.27	0.35	0.014763	1.83	0.0952789	1.57928	114.065	164.7	2.7	Up
M114T174	1.92971e+06	3.31277e+06	3.54225e+06	1.69243e+06	2.95514e+06	2.99867e+06	3.04528e+06	3.65568e+06	4.48622e+06	3.12242e+06	4.56742e+06	5.08552e+06	4.23741e+06	4.88568e+06	3.15655e+06	4.08612e+06	4.20342e+06	4.36181e+06	17.38	2.89149e+06	3.02198e+06	24.76	1.45	0.54	0.004662	2.33	0.0475536	1.65164	114.038	173.9	2.9	Up
M114T194	3.17003e+07	5.75928e+07	3.07547e+07	6.38639e+07	3.02069e+07	8.14082e+07	3.32019e+07	5.02222e+07	6.27037e+07	1.69929e+08	8.28278e+07	4.78591e+07	8.18677e+07	8.14602e+07	1.35336e+08	1.12614e+08	9.68247e+07	8.23478e+07	41.49	4.73689e+07	4.1712e+07	40.37	2.04	1.03	0.004662	2.33	0.0475536	1.71756	114.065	193.7	3.2	Up
M114T208	6.78024e+06	7.23991e+06	1.1959e+07	8.90962e+06	8.2093e+06	8.60035e+06	8.11648e+06	8.27875e+06	9.66386e+06	3.65943e+07	1.44764e+07	9.20317e+06	1.41613e+07	2.38579e+07	2.67044e+07	3.92037e+07	2.17331e+07	1.91672e+07	54.11	8.5117e+06	8.24402e+06	18.29	2.55	1.35	0.000621601	3.21	0.0140919	1.80647	114.065	208.3	3.5	Up
M114T577	4.19118e+07	1.29933e+08	4.05058e+06	1.96567e+08	6.11297e+07	2.29027e+07	2.20883e+07	3.11061e+06	2.12701e+08	1.25682e+08	2.21976e+08	5.89786e+07	7.53753e+07	6.55746e+07	1.50349e+08	2.13537e+08	1.40522e+08	1.38016e+08	49.6	6.02118e+07	3.24072e+07	114.12	2.33	1.22	0.0206682	1.68	0.117429	1.37872	114.065	576.7	9.6	Up
M114T634	1.19289e+08	1.13613e+08	1.17357e+08	5.90954e+07	1.11617e+08	7.40123e+07	8.49197e+07	1.12378e+08	5.36704e+07	5.10829e+07	9.80109e+07	4.64616e+07	9.64051e+07	7.5446e+07	7.92584e+07	9.50707e+07	7.44257e+07	7.73522e+07	28.94	9.90352e+07	1.11998e+08	23.26	0.75	-0.41	0.0498834	1.3	0.201689	1.17629	114.065	634.3	10.6	Down
M114T799	3.2068e+08	2.97529e+08	2.56591e+08	3.20894e+08	3.48128e+08	2.24316e+08	2.305e+08	2.26401e+08	2.37178e+08	1.06813e+08	2.40746e+08	2.72245e+08	1.79374e+08	1.61872e+08	2.4354e+08	2.13603e+08	2.06921e+08	2.2539e+08	26.17	2.7813e+08	2.7706e+08	17.83	0.74	-0.43	0.0498834	1.3	0.201689	1.41652	113.963	798.9	13.3	Down
M115T36	3.38231e+06	2.98222e+06	3.51256e+06	2.94717e+06	3.05988e+06	2.90448e+06	3.49748e+06	3.1602e+06	2.85038e+06	2.87351e+06	2.67965e+06	3.06042e+06	2.92142e+06	3.02939e+06	2.95894e+06	2.5129e+06	2.86083e+06	2.89746e+06	6.41	3.18079e+06	3.11004e+06	7.85	0.9	-0.15	0.0206682	1.68	0.117429	1.52749	114.971	35.7	0.6	Down
M115T419	606124	438200	572033	835550	528880	337536	475507	537822	1.61378e+06	1.8908e+06	1.90929e+06	793493	1.67614e+06	1.61372e+06	887830	2.25652e+06	1.5802e+06	1.64496e+06	31.84	541457	533351	26.89	2.92	1.55	0.0003108	3.51	0.00894927	2.15143	115.095	418.7	7	Up
M115T89	3.5077e+06	3.47539e+06	3.51825e+06	3.30521e+06	3.41883e+06	3.37516e+06	3.35747e+06	3.24937e+06	802899	1.4346e+06	1.27989e+06	1.3675e+06	1.00835e+06	1.24235e+06	1.01392e+06	1.12271e+06	1.15903e+06	1.18253e+06	18.24	3.40092e+06	3.39699e+06	2.85	0.34	-1.55	0.0001554	3.81	0.00610078	2.42128	115.087	89	1.5	Down
M115T92	2.99055e+06	1.03737e+07	3.01522e+07	7.38115e+06	6.42211e+06	3.17598e+06	3.00798e+07	3.21157e+07	6.88555e+07	2.45538e+07	3.57878e+07	4.16764e+07	6.37698e+07	3.50763e+07	3.31044e+07	6.99939e+07	4.66022e+07	3.87321e+07	38.72	1.53364e+07	8.87741e+06	84.88	3.04	1.6	0.0010878	2.96	0.0203124	1.77956	115.07	91.7	1.5	Up
M115T94	1.00606e+07	4.6404e+06	9.11212e+06	428569	8.94342e+06	8.99953e+06	1.91583e+07	9.1027e+06	582337	68022.8	2.56646e+06	7.37619e+06	3.84659e+06	9.65088e+06	8.43042e+06	396703	4.1147e+06	3206528	94.15	8.8057e+06	9.05111e+06	60.17	0.47	-1.1	0.0498834	1.3	0.201689	1.00232	115.05	94.2	1.6	Down
M116T103	5.03728e+06	9.83838e+06	5.88083e+06	9.39647e+06	4.12107e+06	3.22629e+06	6.30362e+06	8.51025e+06	1.41749e+07	6.24397e+06	7.92246e+06	8.05246e+06	1.2704e+07	1.11105e+07	8.46192e+06	1.61197e+07	1.05987e+07	9.7862e+06	32.91	6.53927e+06	6092225	37.68	1.62	0.7	0.0498834	1.3	0.201689	1.42486	116.107	103.1	1.7	Up
M116T356	854197	687832	1.17647e+06	556719	922421	128179	880126	822569	1.23384e+06	1.51631e+06	1.31317e+06	1.15398e+06	1.47995e+06	1.52926e+06	1.27998e+06	1.29868e+06	1.35065e+06	1.30593e+06	10.38	753565	838383	41.13	1.79	0.84	0.0003108	3.51	0.00894927	1.53668	116.034	356.4	5.9	Up
M118T35	3.37586e+07	3.45738e+07	3.61372e+07	3.41291e+07	3.77494e+07	4.30923e+07	3.52826e+07	3.46003e+07	2.96686e+07	2.9553e+07	3.24765e+07	3.4652e+07	2.99295e+07	3.81731e+07	3.34038e+07	2.54915e+07	3.16685e+07	3.1203e+07	12.2	3.61654e+07	3.49414e+07	8.5	0.88	-0.19	0.0281274	1.55	0.141969	1.40962	118.085	35.3	0.6	Down
M119T139	4.94473e+06	4.98462e+06	5.30432e+06	4.16855e+06	3.98128e+06	4.44746e+06	5.17096e+06	7.633e+06	5.70763e+06	518894	2.75566e+06	1.90772e+06	3.26817e+06	3.7055e+06	465726	4.0635e+06	2.7991e+06	3.01191e+06	64.11	5.07936e+06	4.96467e+06	22.38	0.55	-0.86	0.0104118	1.98	0.0771942	1.42178	119.049	139.2	2.3	Down
M119T400	1.75428e+06	5.71255e+06	3.53818e+06	2.31245e+06	5.75472e+06	2.07391e+06	5.10397e+06	3.68447e+06	4.02951e+06	2.47182e+07	5.78004e+06	5.13316e+06	2.69746e+06	1.80715e+07	2.37765e+07	1.78281e+07	1.27543e+07	1.18041e+07	72.75	3.74181e+06	3.61132e+06	43.58	3.41	1.77	0.0206682	1.68	0.117429	1.52411	119.073	399.5	6.7	Up
M119T585	227922	555445	614448	182867	609215	437043	874754	724748	734759	661481	725927	968514	870152	771827	614021	846807	774186	753293	15.01	528305	582330	44.75	1.47	0.55	0.0206682	1.68	0.117429	1.36883	119.049	584.9	9.7	Up
M119T790	1.04214e+07	3.77321e+06	4.96495e+06	9.26158e+06	2.72045e+06	4.07078e+06	3.29841e+06	9.35627e+06	5.99163e+06	1.21408e+07	1.12352e+07	1.257e+07	9.98213e+06	1.06825e+07	9.89164e+06	1.16373e+07	1.05164e+07	1.09589e+07	19.62	5.98338e+06	4.51786e+06	52.57	1.76	0.81	0.0029526	2.53	0.0361958	1.6428	119.014	789.6	13.2	Up
M119T802_2	4.83405e+06	1.3974e+06	2.32551e+06	2.28626e+06	1.61333e+06	1.66357e+06	1.42064e+06	2.1226e+06	3.50842e+06	2.51544e+06	4.89975e+06	1.58655e+06	4.25157e+06	3.45465e+06	4.70724e+06	7.52257e+06	4.05577e+06	3.87999e+06	44.03	2.20792e+06	1.89308e+06	50.93	1.84	0.88	0.0281274	1.55	0.141969	1.48712	119.084	801.6	13.4	Up
M120T100	5.73744e+06	6.51398e+06	6.44046e+06	8.09893e+06	6.90246e+06	5.64845e+06	7.4154e+06	6.85517e+06	7.52208e+06	7.20725e+06	8.50765e+06	6.59556e+06	8.12035e+06	6.94105e+06	6.8868e+06	8.05222e+06	7.47912e+06	7.36467e+06	9.17	6.70154e+06	6.68458e+06	12.19	1.12	0.16	0.0498834	1.3	0.201689	1.21646	120.066	99.7	1.7	Up
M120T87	5.87208e+07	1.02116e+08	1.03579e+08	1.41852e+08	3.26718e+07	6.98246e+07	1.09974e+08	1.39691e+08	1.9957e+08	1.76152e+08	2.9051e+08	1.67432e+08	1.65585e+08	1.59972e+08	1.4031e+08	1.91168e+08	1.86337e+08	1.71792e+08	24.64	9.48037e+07	1.02848e+08	40.61	1.97	0.97	0.0003108	3.51	0.00894927	1.77522	120.066	87.4	1.5	Up
M121T338_2	7.97899e+07	5.97762e+07	4.48797e+07	5.72821e+07	7.23028e+07	7.16033e+07	2.92095e+07	7.64495e+07	1.59679e+08	2.15957e+08	5.00097e+07	1.3684e+08	8.85848e+07	1.3021e+08	1.99715e+08	1.8034e+08	1.45167e+08	1.4826e+08	38.6	6.14116e+07	6.56897e+07	28.31	2.36	1.24	0.004662	2.33	0.0475536	1.80275	121.084	338.4	5.6	Up
M122T338	2.02028e+06	1.77356e+06	2.00451e+06	1.41475e+06	1.73865e+06	1.67594e+06	2.17856e+06	2.38454e+06	2.22987e+06	2.31946e+06	2.13268e+06	2.64748e+06	2.14588e+06	2.53549e+06	1.93051e+06	2.47858e+06	2.30249e+06	2.27467e+06	10.4	1.89885e+06	1.88904e+06	16.24	1.21	0.28	0.0206682	1.68	0.117429	1.53809	122.088	338.4	5.6	Up
M122T34	1.05207e+07	9.20588e+06	1.15948e+07	1.77799e+06	9.10175e+06	1.02316e+07	8.96944e+06	6.11241e+06	1.23813e+07	1.82243e+07	1.63301e+07	1.20447e+07	1.45661e+07	8.89416e+06	1.0204e+07	1.39293e+07	1.33217e+07	1.31553e+07	23.2	8.43932e+06	9.15382e+06	37.09	1.58	0.66	0.014763	1.83	0.0952789	1.34419	121.972	33.9	0.6	Up
M123T139	3.95993e+06	3.47999e+06	3.96064e+06	2.68558e+06	5.3436e+06	2.47371e+06	4.3815e+06	3.25616e+06	8.57579e+06	9.47599e+06	9.08057e+06	8.22304e+06	9.94284e+06	9.99467e+06	9.00292e+06	1.03271e+07	9.32787e+06	9.27828e+06	7.89	3.69264e+06	3.71996e+06	25.24	2.53	1.34	0.0001554	3.81	0.00610078	2.34366	123.044	139.5	2.3	Up
M123T140	2.87926e+08	3.79976e+08	3.04705e+08	2.6817e+08	1.04928e+09	5.26395e+08	3.31225e+08	7.15925e+08	6.70907e+08	5.19753e+08	1.24989e+09	9.7701e+08	1.08887e+09	7.43054e+08	8.88636e+08	7.26703e+08	8.58103e+08	8.15845e+08	27.92	4.8295e+08	3.556e+08	56.78	1.78	0.83	0.014763	1.83	0.0952789	1.70147	123.055	140.2	2.3	Up
M124T140	656013	4.12953e+06	3.13426e+06	750058	2.92662e+06	1.28402e+06	3.8024e+07	2.4409e+07	7.88375e+06	5.89367e+07	6.86828e+06	9.25923e+06	3.47085e+07	8.49666e+07	9.58298e+06	7.18339e+07	3.5505e+07	2.21458e+07	90.7	9.41419e+06	3.03044e+06	148.64	3.77	1.92	0.014763	1.83	0.0952789	1.51998	124.059	140	2.3	Up
M124T83_2	4.10242e+06	3.76428e+06	3.06696e+06	3.5841e+06	3.39076e+06	4.21616e+06	4.64567e+06	3.2683e+06	2.68312e+06	2.50941e+06	3.32796e+06	4.57939e+06	2.75767e+06	3.35635e+06	2.7827e+06	3.30741e+06	3.163e+06	3.04506e+06	20.9	3.75483e+06	3.67419e+06	14.23	0.84	-0.25	0.0498834	1.3	0.201689	1.2646	124.096	83.2	1.4	Down
M125T122	8.21324e+06	7.28908e+06	8.52531e+06	3.71169e+06	7.46737e+06	3.552e+06	8.43386e+06	4.00125e+06	1.00324e+07	1.93159e+07	1.50718e+07	5.89022e+06	8.86173e+06	5.78743e+06	8.23871e+06	9.60819e+06	1.03508e+07	9.23496e+06	44.83	6.39922e+06	7.37823e+06	34.92	1.62	0.69	0.0379176	1.42	0.171246	1.29838	125.06	121.9	2	Up
M125T81	1.57641e+07	2.25929e+07	7.29959e+07	1.50683e+07	1.84964e+07	1.98068e+07	2.29358e+07	5.14041e+07	1.20264e+08	2.12293e+07	1.00142e+08	1.13287e+08	9.93742e+07	2.41276e+07	1.88683e+07	7.77364e+07	7.18787e+07	8.85553e+07	60.64	2.9883e+07	2.11998e+07	70.12	2.41	1.27	0.0281274	1.55	0.141969	1.28773	124.923	80.9	1.3	Up
M126T315	4.8661e+06	5.52887e+06	4.47853e+06	7.16829e+06	4.54916e+06	2.69468e+06	4.65281e+06	5.06481e+06	6.35659e+06	1.64481e+07	1.20704e+07	8.97801e+06	1.24077e+07	1.00502e+07	1.059e+07	1.16636e+07	1.10706e+07	1.11268e+07	26.43	4.87541e+06	4.75946e+06	25.46	2.27	1.18	0.0003108	3.51	0.00894927	2.10594	126.037	314.8	5.2	Up
M126T86	9.60361e+08	1.48229e+09	1.22884e+09	8.51097e+08	1.2695e+09	1.16918e+09	1.12501e+09	8.08131e+08	8.96631e+08	6.80785e+08	1.06409e+09	6.06215e+08	1.33987e+08	5.76231e+08	1.52357e+09	7.67583e+08	7.81136e+08	7.24184e+08	51.8	1.1118e+09	1.1471e+09	20.47	0.7	-0.51	0.0498834	1.3	0.201689	1.12684	126.022	85.7	1.4	Down
M127T101_1	7.57802e+06	2.67446e+06	7.13325e+06	4.39001e+06	5.10159e+06	4.02295e+06	7.58967e+06	7.89622e+06	3.07555e+06	3.70882e+06	4.80144e+06	2.75519e+06	3.79314e+06	2.90197e+06	4.19174e+06	4.99753e+06	3.77817e+06	3.75098e+06	22.41	5.79827e+06	6.11742e+06	34.46	0.65	-0.62	0.0498834	1.3	0.201689	1.29792	127.016	100.6	1.7	Down
M127T101_2	1.60847e+07	1.01239e+07	1.32224e+07	2.94013e+06	4.69889e+06	2.97469e+06	1.54986e+07	2.21652e+06	2.32484e+07	1.85977e+07	2.16173e+07	4.95051e+06	3.4281e+06	1.99181e+07	1.82246e+07	2.17282e+07	1.64641e+07	1.92579e+07	47.18	8.46997e+06	7.41138e+06	70.11	1.94	0.96	0.014763	1.83	0.0952789	1.10047	127.039	101.1	1.7	Up
M127T244	2.83011e+06	3.01523e+06	2.78755e+06	2.86755e+06	3.17165e+06	2.9907e+06	3.00972e+06	3.74787e+06	3.06804e+06	3.79756e+06	3.4976e+06	3.64795e+06	3.6436e+06	3.49338e+06	4.00535e+06	4.10164e+06	3.65689e+06	3.64577e+06	8.88	3.05255e+06	3.00021e+06	10.05	1.2	0.26	0.004662	2.33	0.0475536	1.84857	127.05	244.2	4.1	Up
M127T682	402277	969409	1.55316e+06	630026	1.82949e+06	3.18139e+06	1.24866e+06	904204	107721	304907	158634	252229	69023.3	1.22393e+06	981099	14143.9	388961	205431	116.95	1.33983e+06	1.10903e+06	65.52	0.29	-1.78	0.0104118	1.98	0.0771942	1.59212	127.112	681.6	11.4	Down
M127T72_3	3.29127e+06	3.72235e+06	2.97003e+06	3.29227e+06	3.28861e+06	2.88125e+06	3.29057e+06	1.96679e+06	2.96195e+06	2.32232e+06	2.6764e+06	2.84242e+06	2.77383e+06	2.38045e+06	2.48229e+06	2.6544e+06	2.63676e+06	2.6654e+06	8.57	3.08789e+06	3.28959e+06	16.79	0.85	-0.23	0.014763	1.83	0.0952789	1.23673	127.003	71.6	1.2	Down
M127T86	5.24342e+07	4.14844e+07	5.15476e+07	3.74376e+07	3.30315e+07	3.74111e+07	5.62997e+07	5.73379e+07	3.69021e+07	2.79295e+07	3.72522e+07	3.20171e+07	2.93431e+07	3.9931e+07	5.25025e+07	3.59677e+07	3.64806e+07	3.64349e+07	21.07	4.5873e+07	4.6516e+07	20.88	0.8	-0.33	0.0379176	1.42	0.171246	1.24196	127.025	85.7	1.4	Down
M127T89	1.82467e+07	9.44168e+06	1.46178e+07	1.26746e+07	1.26654e+07	1.22129e+07	1.70501e+07	1.51513e+07	1.93115e+07	1.72035e+07	1.53306e+07	2.01792e+07	2.09484e+07	1.78441e+07	1.6386e+07	1.86512e+07	1.82318e+07	1.82477e+07	10.48	1.40076e+07	1.36462e+07	20.29	1.3	0.38	0.004662	2.33	0.0475536	1.67018	127.039	88.8	1.5	Up
M128T364	4.08853e+06	1.17358e+06	1.41841e+06	2.88721e+06	2.04275e+06	1.07568e+06	2.16278e+06	2.569e+06	4.41342e+06	4.36567e+06	2.29829e+06	3.01371e+06	3.37476e+06	3.05475e+06	3.73175e+06	2.47915e+06	3.34144e+06	3.21476e+06	23.65	2.17724e+06	2.10277e+06	46.34	1.53	0.62	0.0206682	1.68	0.117429	1.4673	128.143	364.5	6.1	Up
M129T137	79616.9	129068	199665	57641.8	54580.7	65119.7	159114	197822	150854	845577	261741	193429	254064	473896	774531	521979	434509	367818	61.19	117829	104342	52.5	3.69	1.88	0.0029526	2.53	0.0361958	1.87774	128.951	137	2.3	Up
M129T818	4.52192e+06	989882	4.53005e+06	2.8925e+06	3.91009e+06	2.4695e+06	3.07597e+06	7.4486e+06	9.32765e+06	1.30175e+07	4.76042e+06	8.8784e+06	3.20554e+06	5.50964e+06	9.90321e+06	6.55311e+06	7.64443e+06	7.71575e+06	41.98	3.72981e+06	3.49303e+06	51.03	2.05	1.04	0.00699301	2.16	0.0602244	1.57538	129.127	817.7	13.6	Up
M130T123	1.39932e+08	8.34686e+07	4.99744e+07	1.02509e+08	1.21908e+08	6.06147e+07	1.16707e+08	6.18571e+07	4.3569e+07	4.12816e+07	6.06366e+07	4.44751e+07	4.32576e+07	8.87803e+07	4.45572e+07	3.22068e+07	4.98455e+07	4.4022e+07	35.21	9.21213e+07	9.29888e+07	35.87	0.54	-0.89	0.004662	2.33	0.0475536	1.6983	130.05	122.7	2	Down
M130T260	970925	1.08694e+06	1.19822e+06	1.01662e+06	1.29556e+06	1.27077e+06	1.20564e+06	1.07957e+06	1.1853e+06	1.52762e+06	1.34311e+06	1.23019e+06	1.23349e+06	1.14268e+06	1.43903e+06	1.49457e+06	1.3245e+06	1.2883e+06	11.17	1.14053e+06	1.14258e+06	10.44	1.16	0.22	0.0379176	1.42	0.171246	1.50957	130.059	259.6	4.3	Up
M130T435	176997	257660	120116	258620	211041	34265.7	486458	454584	296520	396942	415107	696650	504293	419095	388133	769094	485729	417101	33.72	249968	234350	62	1.94	0.96	0.0206682	1.68	0.117429	1.45102	130.123	434.5	7.2	Up
M130T72_2	7.98929e+07	3.81673e+07	5.73385e+07	4.88502e+07	4.1788e+07	2.7977e+07	9.01065e+07	3.63314e+07	1.53219e+07	4.53217e+06	1.21812e+07	2.23126e+07	1.23126e+07	9.76178e+06	7.7461e+07	3.81356e+07	2.40024e+07	1.38172e+07	99.52	5.25565e+07	4.53191e+07	41.84	0.46	-1.13	0.0104118	1.98	0.0771942	1.60364	130.017	71.7	1.2	Down
M130T76	1.69609e+08	1.86545e+08	1.88349e+08	1.79879e+08	1.15473e+08	1.74051e+08	1.60208e+08	1.84226e+08	8.75443e+07	3.63226e+07	1.64881e+08	4.25028e+07	1.68338e+08	9.05437e+07	1.45503e+08	4.12688e+07	9.71131e+07	8.9044e+07	57.65	1.69793e+08	1.76965e+08	14.07	0.57	-0.81	0.0029526	2.53	0.0361958	1.55899	130.086	76.3	1.3	Down
M130T838	6.57324e+07	5.40931e+07	5.24112e+07	3.77439e+07	5.16091e+07	4.78753e+07	5.21212e+07	5.88519e+07	5.54203e+07	6.61914e+07	5.49575e+07	6.13126e+07	6.13426e+07	5.9781e+07	4.9231e+07	1.00819e+08	6.36319e+07	6.05468e+07	24.95	5.25548e+07	5.22662e+07	15.39	1.21	0.28	0.0498834	1.3	0.201689	1.12589	130.049	838.1	14	Up
M130T839	1.69096e+08	5.93651e+07	3.29124e+07	1.39594e+08	1.31032e+07	5.72751e+06	7.42411e+07	8.60254e+07	1.69332e+08	6.90911e+07	1.72965e+08	2.06546e+08	2.0723e+08	1.64763e+08	1.69178e+08	5.94649e+07	1.52321e+08	1.69255e+08	37.35	7.25081e+07	6.68031e+07	80.32	2.1	1.07	0.014763	1.83	0.0952789	1.33556	130.159	838.8	14	Up
M131T116	457193	674267	518646	664099	505452	555437	516219	670794	408776	456734	291919	606412	464789	360444	287265	382675	407377	395725	25.56	570263	537041	15.19	0.71	-0.49	0.004662	2.33	0.0475536	1.715	130.602	115.9	1.9	Down
M131T35	6.42469e+06	5.11832e+06	5.3013e+06	4.52382e+06	4.21136e+06	4.3935e+06	5.53695e+06	5.31759e+06	6.29387e+06	6.43601e+06	5.93721e+06	6.86581e+06	7.21099e+06	7.0937e+06	7.13093e+06	8.02245e+06	6.87387e+06	6.97976e+06	9.45	5.10344e+06	5.20981e+06	14.16	1.35	0.43	0.000621601	3.21	0.0140919	1.99114	130.966	34.9	0.6	Up
M131T550	1.30411e+06	652605	2.96923e+06	724016	766913	270045	1.15367e+06	617034	4.27916e+06	3.96929e+06	4.75876e+06	793407	2.88736e+06	881896	3.29242e+06	3.45367e+06	3.0395e+06	3.37305e+06	48.67	1.0572e+06	745464	79.13	2.88	1.52	0.00699301	2.16	0.0602244	1.60696	131.085	550.1	9.2	Up
M131T89	1.47461e+06	1.75502e+06	1.51288e+06	1.91548e+06	663832	727210	1.41672e+06	453390	684851	1.57554e+06	1.67677e+06	1.85455e+06	2.65291e+06	2.22068e+06	1.66761e+06	2.4678e+06	1.85009e+06	1.76566e+06	33.32	1.23989e+06	1.44566e+06	44.13	1.49	0.58	0.0498834	1.3	0.201689	1.03749	131.034	88.6	1.5	Up
M132T128	7.87592e+06	2.19956e+07	1.58495e+07	8.54846e+06	2.87256e+07	1.70098e+07	1.86608e+07	2.45247e+07	2.21181e+07	1.18078e+08	2.85248e+07	2.31853e+07	1.81627e+07	3.58195e+07	1.34824e+08	9.95223e+07	6.00293e+07	3.21722e+07	81.24	1.78988e+07	1.78353e+07	40.69	3.35	1.75	0.014763	1.83	0.0952789	1.5784	132.077	127.6	2.1	Up
M132T202	6.04978e+06	2.53091e+06	2.53421e+06	7.107e+06	1.00793e+07	1.27584e+07	2.28083e+06	8.8239e+06	8.62861e+06	643626	1.96004e+06	1.82514e+06	6.86267e+06	4.29088e+06	2.0657e+06	752411	3.37864e+06	2.01287e+06	87.42	6.52054e+06	6.57839e+06	60.02	0.52	-0.95	0.0379176	1.42	0.171246	1.15185	132.066	201.8	3.4	Down
M132T770	1.12967e+07	7.07036e+06	1.20031e+07	1.10879e+07	8.72975e+06	7.6734e+06	1.08733e+07	6.76946e+06	1.25489e+07	1.44607e+07	1.27979e+07	9.57379e+06	1.46607e+07	1.07169e+07	8.26782e+06	1.41341e+07	1.21451e+07	1.26734e+07	19.66	9.438e+06	9.80152e+06	22.35	1.29	0.36	0.0498834	1.3	0.201689	1.28545	132.077	769.8	12.8	Up
M132T94_2	2.41688e+10	2.33538e+10	2.18914e+10	2.41444e+10	1.91867e+10	1.85928e+10	2.48382e+10	2.54386e+10	2.48864e+10	2.54533e+10	2.51715e+10	2.63736e+10	2.5607e+10	2.56742e+10	2.47309e+10	2.5005e+10	2.53627e+10	2.53124e+10	2.1	2.27018e+10	2.37491e+10	11.37	1.12	0.16	0.0029526	2.53	0.0361958	1.44838	132.077	94.4	1.6	Up
M132T94_3	1.81016e+06	5.15701e+06	3.95646e+06	3.40359e+06	4.7882e+06	5.82856e+06	4.32389e+06	6.18085e+06	6.7037e+06	8.88454e+06	1.11994e+07	6.96291e+06	5.87505e+06	6.96189e+06	5.73911e+06	9.03699e+06	7.67045e+06	6.9624e+06	24.48	4.43109e+06	4.55605e+06	31.72	1.73	0.79	0.0010878	2.96	0.0203124	1.75517	132.118	94.3	1.6	Up
M133T768	1.82559e+06	2.43616e+06	3.06573e+06	1.45739e+06	2.93109e+06	3.00855e+06	3.71145e+06	1.60387e+06	1.41745e+06	1.04336e+06	213429	1.56409e+06	1.77069e+06	633111	233479	540916	927065	838235	65.71	2.50498e+06	2.68363e+06	32.29	0.37	-1.43	0.0010878	2.96	0.0203124	1.79638	133.101	767.6	12.8	Down
M133T94	7.64132e+08	8.76295e+08	8.05337e+08	8.55661e+08	7.42988e+08	7.91569e+08	9.42955e+08	7.9267e+08	1.02806e+09	1.36419e+09	1.23829e+09	1.11311e+09	1.08648e+09	1.41042e+09	1.00023e+09	1.39774e+09	1.20482e+09	1.1757e+09	14.08	8.21451e+08	7.99004e+08	8.02	1.47	0.55	0.0001554	3.81	0.00610078	2.14903	133.08	94.3	1.6	Up
M134T122	6.26772e+06	6.91383e+06	5.30686e+06	6.66132e+06	4.27781e+06	6.729e+06	3.3409e+06	5.29791e+06	2.41038e+06	900169	3.65735e+06	3.01424e+06	3.12661e+06	4.47127e+06	3.46205e+06	2.57258e+06	2.95183e+06	3.07042e+06	35.64	5.59942e+06	5.78729e+06	22.99	0.53	-0.92	0.0018648	2.73	0.0275628	1.73062	134.035	121.6	2	Down
M134T189	2.96001e+06	4.41323e+06	5.4901e+06	5.28523e+06	4.28167e+06	4.43468e+06	4.6612e+06	4.73004e+06	5.66373e+06	1.52802e+07	6.84276e+06	8.05758e+06	7.33523e+06	1.1883e+07	1.23473e+07	1.50631e+07	1.03091e+07	9.97027e+06	36.93	4.53202e+06	4.54794e+06	16.88	2.27	1.19	0.0001554	3.81	0.00610078	2.01648	134.107	189.3	3.2	Up
M134T222	2.14326e+06	4.76151e+06	4.14325e+06	4.46863e+06	4.24012e+06	3.66082e+06	2.34678e+06	4.7787e+06	6.54927e+06	1.63257e+07	6.97522e+06	6.01517e+06	6.7695e+06	6.76489e+06	8.04175e+06	1.03455e+07	8.47337e+06	6.87236e+06	40.68	3.81788e+06	4.19169e+06	27.14	2.22	1.15	0.0001554	3.81	0.00610078	1.97656	134.107	222.4	3.7	Up
M134T76	223591	86338.9	105587	200527	131692	76869.2	93311	100671	497252	356702	522416	266421	309077	634405	573912	147125	413414	426977	40.9	127323	103129	43.23	3.25	1.7	0.000621601	3.21	0.0140919	2.03163	134.101	76	1.3	Up
M134T85	5.75947e+08	6.7689e+08	5.63522e+08	5.67901e+08	5.82529e+08	2.52467e+08	9.79554e+08	7.84951e+08	6.5781e+08	6.69471e+07	3.98087e+08	7.19019e+08	4.34795e+08	7.708e+07	6.0061e+07	7.23144e+07	3.10764e+08	2.37583e+08	89.7	6.2297e+08	5.79238e+08	33.45	0.5	-1	0.0498834	1.3	0.201689	1.46426	134.045	85.2	1.4	Down
M135T90	258815	1.68755e+06	2.52401e+06	1.73789e+06	1.71161e+06	2.01386e+06	2.71883e+06	2.36124e+06	2.81068e+06	5.94258e+06	2.95783e+06	2.95156e+06	3.22043e+06	2.57002e+06	2.76752e+06	2.33756e+06	3.19477e+06	2.88112e+06	35.73	1.87673e+06	1.87588e+06	40.69	1.7	0.77	0.0018648	2.73	0.0275628	1.30999	135.065	90.1	1.5	Up
M136T105	243392	210228	947738	254109	233100	250346	244494	238810	264268	3.35337e+06	930892	1.36302e+06	1.42048e+06	1.01539e+06	956019	2.66348e+06	1.49586e+06	1.18921e+06	67.78	327777	243943	76.53	4.56	2.19	0.000621601	3.21	0.0140919	1.90828	136.043	104.8	1.7	Up
M136T124	4.14582e+07	5.345e+07	4.71822e+07	4.2009e+07	3.73967e+07	4.26141e+07	4.77825e+07	4.83437e+07	4.78207e+07	7.85566e+07	4.87136e+07	4.97739e+07	4.87437e+07	6.88563e+07	6.33554e+07	4.40847e+07	5.62381e+07	4.92588e+07	22.1	4.50295e+07	4.48981e+07	11.26	1.25	0.32	0.014763	1.83	0.0952789	1.37319	136.076	124.4	2.1	Up
M136T139	1.15183e+07	1.01735e+07	4.80226e+06	1.09562e+07	2.3635e+07	1.07671e+07	2.19028e+07	1.0451e+07	3.63676e+07	2.90969e+07	3.36267e+07	3.41228e+07	3.42479e+07	2.95618e+07	4.19829e+07	3.50564e+07	3.42579e+07	3.41854e+07	11.77	1.30258e+07	1.08617e+07	49.02	2.63	1.4	0.0001554	3.81	0.00610078	2.11776	136.076	139.4	2.3	Up
M136T662	3.35323e+06	3.21764e+06	4.458e+06	2.50599e+06	4.31928e+06	4.57809e+06	3.30309e+06	2.58353e+06	2.15801e+06	3.68198e+06	2.32353e+06	3.90006e+06	2.39835e+06	3.01537e+06	1.99551e+06	1.47656e+06	2.61867e+06	2.36094e+06	32.18	3.53986e+06	3.32816e+06	23.16	0.74	-0.43	0.0379176	1.42	0.171246	1.28955	136.022	662.3	11	Down
M136T92	2.34418e+06	1.55555e+06	1.54607e+06	1.79048e+06	1.74123e+06	1.81363e+06	2.11605e+06	1.63296e+06	3.32234e+06	1.57526e+06	3.35494e+06	3.61483e+06	1.93777e+06	2.14968e+06	2.9291e+06	2.29463e+06	2.64732e+06	2.61186e+06	28.54	1.81752e+06	1.76586e+06	15.41	1.46	0.54	0.0206682	1.68	0.117429	1.53158	136.048	91.8	1.5	Up
M137T125	5.75394e+06	2.34388e+06	4.2341e+06	5.73392e+06	7.48924e+06	3.52388e+06	5.46725e+06	4.86758e+06	2.22203e+06	3.19249e+06	4.8749e+06	3.48502e+06	2.21787e+06	4.60741e+06	2.18104e+06	3.19197e+06	3.24659e+06	3.19223e+06	32.53	4.92672e+06	5.16742e+06	31.92	0.66	-0.6	0.0206682	1.68	0.117429	1.30802	137.079	124.7	2.1	Down
M137T146_2	2.41366e+09	1.98785e+09	2.34144e+09	2.34632e+09	2.04272e+09	2.60131e+09	2.83118e+09	2.89286e+09	2.57922e+09	3.33036e+09	2.74633e+09	2.88222e+09	3.48825e+09	3.03998e+09	2.73468e+09	3.52028e+09	3.04016e+09	2.9611e+09	12.01	2.43217e+09	2.37999e+09	13.59	1.25	0.32	0.0104118	1.98	0.0771942	1.72383	137.046	145.7	2.4	Up
M137T385	127319	109197	193650	165665	135210	224400	134630	170516	245742	833557	537298	285017	351792	275428	425178	403819	419729	377805	45.85	157574	150438	24.32	2.66	1.41	0.0001554	3.81	0.00610078	2.09983	137.065	385.2	6.4	Up
M137T517	734560	738307	734093	824446	33016.5	39554.4	931184	900247	804771	774252	1.23906e+06	870445	1.30894e+06	929192	968636	1.20799e+06	1012910	948914	20.65	616926	736433	59.36	1.64	0.72	0.014763	1.83	0.0952789	1.09864	137.096	516.8	8.6	Up
M137T88	871566	471506	1.0275e+06	584452	1.58991e+06	822312	1.84616e+06	1.46119e+06	1.9055e+06	1.71061e+06	2.03951e+06	2.13384e+06	1.59379e+06	1.61103e+06	1.46669e+06	1.7238e+06	1.7731e+06	1.71721e+06	13.09	1.08432e+06	949532	45.72	1.64	0.71	0.004662	2.33	0.0475536	1.69852	137.071	88.5	1.5	Up
M138T180	1.33376e+08	1.14659e+08	1.56061e+08	1.17749e+08	1.61801e+08	1.48834e+08	1.82798e+08	1.27738e+08	1.75758e+08	2.71178e+08	1.82105e+08	1.92831e+08	1.91278e+08	1.91075e+08	1.82567e+08	2.25769e+08	2.0157e+08	1.91176e+08	15.83	1.42877e+08	1.41105e+08	16.54	1.41	0.5	0.0010878	2.96	0.0203124	1.92843	138.049	180	3	Up
M138T400	238103	570721	199934	769302	396349	151823	363238	139479	2.70375e+06	5.91866e+06	4.02497e+06	553021	806591	727764	3.18616e+06	2.74714e+06	2.58351e+06	2.72545e+06	72.16	353619	300671	62.82	7.31	2.87	0.0010878	2.96	0.0203124	1.95844	138.023	399.6	6.7	Up
M139T280	1.56777e+07	4.89782e+06	1.3983e+07	1.804e+06	1.30067e+07	1.10664e+07	1.47444e+07	1.15774e+07	2.82668e+06	310150	517371	3.13353e+06	4.72048e+06	8.81091e+06	1.48294e+06	4.1662e+06	3.24603e+06	2.98011e+06	85.05	1.08447e+07	1.22921e+07	45.55	0.3	-1.74	0.004662	2.33	0.0475536	1.56688	139.05	280.1	4.7	Down
M139T710	2.67115e+06	2.42098e+06	2.69873e+06	2.75833e+06	2.53073e+06	3.43778e+06	2.16788e+06	2.8516e+06	2.63563e+06	1.45647e+06	2.66725e+06	1.98984e+06	2.37993e+06	2.06511e+06	2.41372e+06	2.62428e+06	2.27903e+06	2.39683e+06	18.4	2.69215e+06	2.68494e+06	13.76	0.85	-0.24	0.0281274	1.55	0.141969	1.16891	139.112	710.4	11.8	Down
M140T111	6.27382e+06	1.54998e+07	1.19096e+07	6.69966e+06	1.12925e+07	6.76179e+06	9.38218e+06	9.17912e+06	1.84463e+07	1.2453e+07	1.49368e+07	1.12309e+07	1.61122e+07	1.38873e+07	1.06794e+07	1.6136e+07	1.42352e+07	1.4412e+07	18.84	9.6248e+06	9.28065e+06	33.03	1.48	0.56	0.014763	1.83	0.0952789	1.59413	140.082	111.1	1.9	Up
M140T250	1.76634e+08	2.54171e+08	1.75846e+08	1.80671e+08	1.4976e+08	1.42899e+08	2.06897e+08	1.8439e+08	1.27029e+08	1.265e+08	1.26124e+08	1.71102e+08	1.07925e+08	1.08563e+08	1.00577e+08	1.07952e+08	1.21972e+08	1.17343e+08	18.36	1.83908e+08	1.78652e+08	18.88	0.66	-0.59	0.000621601	3.21	0.0140919	1.9878	139.98	250	4.2	Down
M140T405	5.25931e+07	2.4928e+07	2.57131e+07	7.88288e+06	1.78747e+07	1.84298e+07	4.90161e+07	2.14547e+07	1.41009e+07	8.13613e+06	6.94221e+06	4.67838e+07	8.16606e+06	1.51395e+07	7.94869e+06	9.50975e+06	1.45909e+07	8.83791e+06	91.52	2.72366e+07	2.31914e+07	57.19	0.54	-0.9	0.0379176	1.42	0.171246	1.31476	139.984	404.6	6.7	Down
M140T575	3.4132e+06	4.27412e+06	7.28068e+06	5.11415e+06	9.78599e+06	6.38415e+06	5.05455e+06	1.14723e+07	9.65234e+06	1.14232e+07	1.75617e+07	1.27891e+07	1.02739e+07	1.08502e+07	1.12874e+07	1.56839e+07	1.24402e+07	1.13553e+07	22.37	6.59739e+06	5.74915e+06	42.32	1.89	0.92	0.004662	2.33	0.0475536	1.9223	139.981	575.5	9.6	Up
M140T593	3.12313e+06	4.55315e+06	6.87769e+06	2.94434e+06	1.18698e+07	2.16695e+07	4.28415e+06	3.30391e+06	988830	538465	2.03661e+06	827688	1.41028e+06	4.27608e+06	3.00831e+06	152605	1.65486e+06	1.19955e+06	84.04	7.32821e+06	4.41865e+06	88.82	0.23	-2.15	0.0018648	2.73	0.0275628	1.69614	139.98	593.4	9.9	Down
M140T69	7.30937e+06	6.69406e+06	7.10584e+06	6.39497e+06	6.84922e+06	5.41712e+06	6.78877e+06	6.31121e+06	9.41109e+06	1.1094e+07	8.9683e+06	8.4758e+06	7.64853e+06	8.00099e+06	5.88738e+06	7.59375e+06	8.38498e+06	8.2384e+06	18.2	6.60882e+06	6.74141e+06	8.84	1.27	0.34	0.00699301	2.16	0.0602244	1.57108	139.963	68.9	1.1	Up
M140T77	990446	1.04727e+06	1.11889e+06	1.17028e+06	1.04027e+06	1.0952e+06	1.15438e+06	1.06728e+06	1.25889e+06	1.61131e+06	1.26908e+06	1.28475e+06	1.17145e+06	1.23491e+06	1.17936e+06	1.19095e+06	1.27509e+06	1.2469e+06	11.17	1.0855e+06	1.08124e+06	5.62	1.17	0.23	0.0001554	3.81	0.00610078	1.76872	140.068	76.8	1.3	Up
M141T104	1.23283e+06	2.39336e+06	1.54203e+06	2.12333e+06	2.46917e+06	1.44066e+06	1.35531e+06	1.38547e+06	1.35146e+06	795480	853278	1.58616e+06	1.09509e+06	1.83495e+06	666628	1.2298e+06	1.17661e+06	1.16244e+06	34.46	1.74277e+06	1.49134e+06	28.81	0.68	-0.57	0.0281274	1.55	0.141969	1.46327	140.995	103.6	1.7	Down
M141T111	251326	122928	123842	209543	193804	72922.2	108161	238987	155421	333000	468680	340241	343956	321707	313412	113538	298745	327354	37.83	165189	158823	40.23	1.81	0.85	0.0206682	1.68	0.117429	1.45128	141.085	111.2	1.9	Up
M141T364	445566	299498	438244	40702.8	495181	48109.2	801601	302892	257511	6723.58	28730	213169	35790.8	302167	26971.4	389778	157605	124480	95.67	358974	370568	69.27	0.44	-1.19	0.0281274	1.55	0.141969	1.08798	141.074	364.4	6.1	Down
M142T135	1.95198e+07	1.42656e+07	1.52638e+07	1.37466e+07	2.14618e+07	8.61138e+06	2.28325e+07	1.43639e+07	5.10638e+07	2.39291e+07	7.00455e+07	3.19631e+07	3.45089e+07	1.46156e+07	1.67351e+07	3.0339e+07	3.415e+07	3.1151e+07	54.03	1.62582e+07	1.48139e+07	28.87	2.1	1.07	0.00699301	2.16	0.0602244	1.57606	141.958	135.1	2.3	Up
M142T485	457321	112106	135468	132594	253116	451761	114690	113353	602853	484004	162136	597920	428808	156800	136094	357685	365788	393247	53.29	221301	134031	68.32	1.65	0.72	0.0498834	1.3	0.201689	1.01334	142.123	485	8.1	Up
M142T625	457779	343408	444973	550126	460504	557871	476375	589879	527342	457572	251509	246064	534546	416384	204079	286786	365535	351585	36.61	485114	468440	16.27	0.75	-0.41	0.0498834	1.3	0.201689	1.27935	142.123	625	10.4	Down
M142T72_2	986178	721892	885560	770211	697409	674944	838579	887876	1.10285e+06	1.22911e+06	1.14465e+06	1.1815e+06	1.28608e+06	1.037e+06	1.08117e+06	1.22604e+06	1.16105e+06	1.16308e+06	7.3	807831	804395	13.55	1.44	0.52	0.0001554	3.81	0.00610078	2.18392	142.052	71.5	1.2	Up
M143T542	1.28106e+06	2.01982e+06	1.7997e+06	1.35001e+06	1.87615e+06	2.14316e+06	1.96667e+06	1.2138e+06	5.14981e+06	2.23943e+06	4.6713e+06	2.90805e+06	3.65414e+06	2.19669e+06	2.15449e+06	2.39416e+06	3.17101e+06	2.65111e+06	37.55	1.70629e+06	1.83792e+06	21.53	1.86	0.89	0.0001554	3.81	0.00610078	1.78863	143.107	542.1	9	Up
M143T82	1.47244e+07	1.85348e+07	2.56423e+07	1.41766e+07	3.06171e+07	4.71826e+07	2.17179e+07	1.7898e+07	9.64608e+06	9.43871e+06	1.29699e+07	1.44891e+07	1.16558e+07	1.97037e+07	1.99556e+07	7.30707e+06	1.31458e+07	1.23129e+07	35.62	2.38117e+07	2.01264e+07	45.96	0.55	-0.86	0.014763	1.83	0.0952789	1.5265	142.948	82.1	1.4	Down
M144T315_1	301834	1.34282e+06	1.07037e+06	747413	555611	460715	983845	270795	1.3596e+06	1.08438e+06	718908	914495	1.2876e+06	1.08256e+06	1.25984e+06	1.03397e+06	1.09267e+06	1.08347e+06	19.33	716675	651512	54.09	1.52	0.61	0.0498834	1.3	0.201689	1.3041	143.946	314.8	5.2	Up
M144T315_2	9.84377e+08	9.22678e+08	1.18549e+09	1.47242e+09	1.65961e+09	4.82087e+08	1.44336e+09	1.05191e+09	1.94011e+09	1.95176e+09	2.17688e+09	2.42297e+09	1.70709e+09	1.08529e+09	1.62247e+09	1.65258e+09	1819894730	1.8236e+09	22.2	1.15024e+09	1.1187e+09	32.63	1.58	0.66	0.004662	2.33	0.0475536	1.57328	144.048	314.8	5.2	Up
M144T315_3	1.20208e+07	6.58252e+06	2.22036e+06	1.04561e+07	4.73596e+06	6.46075e+06	1.24724e+07	7.90397e+06	9.02624e+06	1.30222e+07	1.76824e+07	1.59851e+07	8.85636e+06	1.13062e+07	1.00253e+07	1.75315e+07	1.29294e+07	1.21642e+07	28.64	7.85661e+06	7.24325e+06	45.76	1.65	0.72	0.0281274	1.55	0.141969	1.40057	144.15	314.7	5.2	Up
M144T397	5.11967e+06	486916	964669	4.81388e+06	4.03487e+06	424563	4.7576e+06	951201	6.5604e+06	8.17403e+06	9.32167e+06	3.61471e+06	1.06402e+06	3.72094e+06	7.68957e+06	5.25742e+06	5.67535e+06	5.90891e+06	48.89	2.69417e+06	2.49977e+06	79.96	2.11	1.07	0.0379176	1.42	0.171246	1.27752	144.081	397.1	6.6	Up
M144T428	5.47508e+06	6.8167e+06	1.03938e+07	3.50755e+06	1.82288e+07	3.20245e+07	8.41538e+06	2.10684e+06	336613	948320	547284	5.31781e+06	2.32079e+06	8.127e+06	6.57971e+06	61006.2	3.02982e+06	1.63456e+06	105.03	1.08711e+07	7.61604e+06	90.96	0.28	-1.84	0.0206682	1.68	0.117429	1.43945	144.081	427.8	7.1	Down
M144T464	315.841	928.009	1043.11	1030.04	21681.2	286.971	337.879	61913.2	321438	757998	580841	459.146	219409	82304.4	335591	482174	347527	328514	72.88	10942	979.02	199.89	31.76	4.99	0.0029526	2.53	0.0361958	1.87446	144.175	464.3	7.7	Up
M144T689	2.72858e+06	450809	1.78617e+06	1.6189e+06	4.04926e+06	1.72978e+06	1.62957e+06	2.19039e+06	1.65107e+06	3.35713e+06	6.24962e+06	5.95152e+06	5.04745e+06	4.70382e+06	5.14202e+06	2.49497e+06	4.3247e+06	4.87564e+06	38.21	2.02293e+06	1.75797e+06	51.38	2.14	1.1	0.0104118	1.98	0.0771942	1.6077	144.138	688.5	11.5	Up
M144T98	1.7733e+06	1.99592e+06	2.09031e+06	3.86766e+06	4.50704e+06	1.61289e+06	2.01036e+06	4.02663e+06	7.34578e+06	7.42438e+06	7.6854e+06	5.09497e+06	6.58729e+06	6.2442e+06	6.01785e+06	6.55637e+06	6.61953e+06	6.57183e+06	12.95	2.73551e+06	2.05033e+06	43.17	2.42	1.27	0.0001554	3.81	0.00610078	2.15994	144.065	98.1	1.6	Up
M145T34	1.76613e+07	1.73035e+07	1.77464e+07	1.61272e+07	1.56701e+07	1.5071e+07	1.70813e+07	1.65147e+07	2.08418e+07	2.82275e+07	2.52685e+07	2.05276e+07	2.01779e+07	1.63365e+07	1.78926e+07	2.30019e+07	2.15343e+07	2.06847e+07	17.94	1.66469e+07	1.6798e+07	5.83	1.29	0.37	0.0029526	2.53	0.0361958	1.74868	145.049	33.6	0.6	Up
M145T815	1.62483e+07	5.70895e+07	4.06357e+07	7.02644e+07	3.42609e+07	2.96445e+07	5.288e+07	4.88684e+07	2.24502e+07	1.37244e+07	1.93197e+07	5.24529e+07	2.62661e+07	1.80534e+07	1.46152e+07	1.48459e+07	2.2716e+07	1.86866e+07	56.15	4.37365e+07	4.4752e+07	39.09	0.52	-0.95	0.014763	1.83	0.0952789	1.58343	144.982	815.3	13.6	Down
M146T115	2.06067e+07	9.91073e+07	1.39014e+07	1.57097e+07	1.25738e+07	1.09062e+07	1.50341e+07	1.41766e+07	9.49822e+06	1.14047e+07	1.53577e+07	1.85262e+07	8.56407e+06	8.80466e+06	8.26134e+06	8.85881e+06	1.11595e+07	9.17851e+06	33.99	2.5252e+07	1.46053e+07	118.71	0.44	-1.18	0.0379176	1.42	0.171246	1.23387	146.118	115.2	1.9	Down
M146T314	3.76427e+06	6.04913e+06	2.9134e+06	5.57564e+06	628331	2.98721e+06	3.00015e+06	2.77277e+06	1.30584e+06	164661	919877	1.36967e+06	978690	626866	819722	843143	878559	881510	43.3	3.46136e+06	2.99368e+06	49.44	0.25	-1.98	0.004662	2.33	0.0475536	1.85913	146.055	314.2	5.2	Down
M146T383	2.54949e+06	3.93661e+06	2.9805e+06	4.11864e+06	97195.4	991670	2.16834e+06	1.77075e+06	133872	739868	288002	1.58182e+06	400267	468050	166277	1.22443e+06	625323	434159	83.93	2.32665e+06	2.35892e+06	59.39	0.27	-1.9	0.0206682	1.68	0.117429	1.39539	146.118	382.5	6.4	Down
M146T395	1.94678e+06	922411	805366	1.19001e+06	671429	1.07234e+06	735273	236263	274309	141798	307054	593746	183774	385296	164713	245765	287057	260037	51.45	947484	863888	52.33	0.3	-1.72	0.0029526	2.53	0.0361958	1.91933	146.118	395	6.6	Down
M146T72	1.81486e+07	1.56284e+07	1.79674e+07	1.47651e+07	1.67248e+07	1.65218e+07	1.87603e+07	1.78095e+07	1.50539e+07	1.54255e+07	1.46788e+07	1.68314e+07	1.50108e+07	1.61082e+07	1.56846e+07	1.37602e+07	1.53192e+07	1.52397e+07	6.07	1.70407e+07	1.72672e+07	8.05	0.9	-0.15	0.0281274	1.55	0.141969	1.49908	146.03	71.7	1.2	Down
M146T97	5.18271e+07	5.54954e+07	1.35584e+08	1.57448e+08	6.22676e+07	4.40961e+07	7.15008e+07	1.99866e+08	2.34987e+08	2.96269e+08	6.6141e+07	2.86353e+08	5.92637e+07	2.0534e+08	3.02954e+08	2.7129e+08	2.15325e+08	2.53138e+08	46.28	9.72606e+07	66884224	60.38	2.21	1.15	0.014763	1.83	0.0952789	1.38985	146.118	96.8	1.6	Up
M147T113	1.23849e+07	1.21762e+07	1.90246e+07	5.9132e+06	4.01072e+07	1.9389e+07	4.75434e+07	3.56778e+07	5.67906e+07	5.24027e+07	6.81572e+07	5.81004e+07	5.07514e+07	4.48068e+07	4.46086e+07	5.39801e+07	5.36997e+07	5.31914e+07	14.25	2.4027e+07	1.92068e+07	62.88	2.23	1.16	0.000621601	3.21	0.0140919	1.84427	147.077	113.2	1.9	Up
M147T139	1.18575e+06	4.71702e+06	4.22253e+06	840390	8.74805e+06	935434	5.24051e+06	526219	1.21246e+07	1.03886e+07	1.36585e+07	8.15884e+06	1.13268e+07	8.38427e+06	1.09679e+07	1.16543e+07	1.0833e+07	1.11474e+07	17.07	3.30199e+06	2.70414e+06	88.75	3.28	1.71	0.000621601	3.21	0.0140919	1.85674	147.044	139.5	2.3	Up
M147T191	4.85168e+06	2.76006e+06	5.12702e+06	4.10083e+06	3.99448e+06	3.14171e+06	5.07751e+06	4.81845e+06	6.57374e+06	7.40988e+06	6.72744e+06	8.7839e+06	6.28112e+06	6.15541e+06	5.36764e+06	6.8479e+06	6.76838e+06	6.65059e+06	14.87	4.23397e+06	4.45964e+06	21.26	1.6	0.68	0.0001554	3.81	0.00610078	2.00557	147.044	191	3.2	Up
M147T578	722838	626107	1.59987e+06	1.62479e+06	2.46835e+06	2.41866e+06	1.08893e+06	1.71437e+06	424409	461886	585481	670724	812439	634549	886798	585172	632682	610015	25.02	1.53299e+06	1.61233e+06	45.34	0.41	-1.28	0.004662	2.33	0.0475536	1.76439	147.063	578.2	9.6	Down
M147T97	7.0708e+06	5.1529e+06	8.65792e+06	9.89335e+06	1.14292e+07	8.45586e+06	7.94254e+06	6.356e+06	1.57346e+07	1.69987e+07	1.63227e+07	1.40405e+07	1.50234e+07	1.44553e+07	1.39258e+07	1.59592e+07	1.53075e+07	1.5379e+07	7.33	8.11982e+06	8.1992e+06	24.43	1.89	0.91	0.0001554	3.81	0.00610078	2.21866	147.121	96.9	1.6	Up
M148T116	3.44894e+07	2.12013e+07	3.10781e+07	6.49047e+06	5.0166e+07	2.79869e+07	4.31189e+07	2.54505e+07	1.20561e+07	1.49746e+07	1.14079e+07	1.18259e+07	1.13e+07	2.00703e+07	1.08315e+07	1.94946e+07	1.39952e+07	1.1941e+07	27.08	2.99977e+07	2.95325e+07	44.64	0.47	-1.1	0.0104118	1.98	0.0771942	1.44323	148.06	116.3	1.9	Down
M148T72	2.51373e+06	1.94138e+06	2.16189e+06	1.85359e+06	1.70415e+06	1.55951e+06	1.84997e+06	1.8375e+06	2.65461e+06	2.99119e+06	2.58457e+06	2.66678e+06	2.71642e+06	2.84974e+06	2.74359e+06	2.90528e+06	2.76402e+06	2.73001e+06	5.03	1.92771e+06	1.85178e+06	15.23	1.43	0.52	0.0001554	3.81	0.00610078	2.16359	148.027	71.8	1.2	Up
M148T77	1.80367e+06	1.76404e+06	1.79334e+06	1.75176e+06	1.53532e+06	1.69769e+06	2.19479e+06	1.90725e+06	988336	1.1401e+06	1.07139e+06	1.37265e+06	1.03268e+06	1.25669e+06	979593	1.28447e+06	1.14074e+06	1.10575e+06	12.98	1.80598e+06	1.77869e+06	10.49	0.63	-0.66	0.0001554	3.81	0.00610078	2.26663	148.084	77.1	1.3	Down
M148T85	4.08494e+06	2.89331e+06	2.78921e+06	4.58171e+06	3.62836e+06	4.57153e+06	4.34712e+06	2.37702e+06	3.67564e+06	2.38374e+08	5.24158e+06	3.81685e+06	3.95471e+06	2.38013e+08	2.08413e+08	1.82442e+08	1.10491e+08	9.38416e+07	104.09	3.65915e+06	3.85665e+06	23.84	30.2	4.92	0.0379176	1.42	0.171246	1.50613	148.08	85.3	1.4	Up
M148T99_1	568053	701306	549752	843386	652593	528731	1.42667e+06	574443	719091	2.83348e+06	698840	676733	1.85716e+06	2.88137e+06	2.3945e+06	3.36761e+06	1.9286e+06	2.12583e+06	57.34	730617	613518	41.01	2.64	1.4	0.0104118	1.98	0.0771942	1.56216	148.097	99.4	1.7	Up
M150T107	896204	774803	879224	935559	1.27028e+06	702592	1.08966e+06	1.14896e+06	835965	277531	895213	656962	906505	320266	323863	311706	566001	490412	50.52	962160	915881	20.05	0.59	-0.77	0.014763	1.83	0.0952789	1.58954	149.664	107.3	1.8	Down
M150T122	1.39392e+08	3.77972e+07	2.19444e+08	5.36759e+07	1.65424e+08	1.56601e+08	3.41645e+08	2.61645e+08	5.18016e+08	7.5273e+08	6.38356e+08	2.95921e+08	3.50252e+08	7.59322e+08	1.10261e+09	1.35335e+08	5.69067e+08	5.78186e+08	54.47	1.71953e+08	1.61012e+08	59.15	3.31	1.73	0.00699301	2.16	0.0602244	1.74977	150.058	121.7	2	Up
M150T338	1.02722e+06	2.5078e+06	1.52596e+06	771823	1.72783e+06	4.26864e+06	1.73881e+06	2.3626e+06	2.26706e+06	9.07222e+06	2.80206e+06	1.36204e+06	3.77673e+06	4.0283e+06	5.27533e+06	7.76296e+06	4.54334e+06	3.90252e+06	59.18	1.99133e+06	1.73332e+06	54.87	2.28	1.19	0.0379176	1.42	0.171246	1.47794	150.063	338.4	5.6	Up
M150T418	2.47796e+06	2.36371e+06	1.33552e+06	1.43741e+06	2.5393e+06	2.58767e+06	3.61004e+06	2.42672e+06	1.05181e+06	545773	1.32801e+06	2.96948e+06	2.07117e+06	1.51154e+06	1.03224e+06	1.71141e+06	1.52768e+06	1.41978e+06	48.76	2.34729e+06	2.45234e+06	30.4	0.65	-0.62	0.0498834	1.3	0.201689	1.3086	150.057	417.8	7	Down
M150T686	509473	54692.7	153033	239147	138478	383127	242374	227364	298008	933298	498379	422788	854696	429219	812860	507952	594650	503166	39.78	243461	233255	59.19	2.44	1.29	0.004662	2.33	0.0475536	1.7514	150.092	686.4	11.4	Up
M150T84_1	3.34719e+06	2.50684e+06	5.0633e+06	1.32986e+06	6.57262e+06	3.3893e+06	6.02703e+06	4.3728e+06	6.23547e+06	1.13609e+07	1.10393e+07	7.03308e+06	4.85708e+06	5.32968e+06	4.48519e+06	5.26267e+06	6.95043e+06	5.78258e+06	39.45	4.07612e+06	3.88105e+06	43.6	1.71	0.77	0.0281274	1.55	0.141969	1.46185	150	83.8	1.4	Up
M151T122	5.95634e+07	6.99906e+07	6.28507e+07	7.93591e+07	7.14704e+07	6.77287e+07	5.74325e+07	6.26876e+07	6.54636e+07	1.64552e+07	6.5224e+07	5.70062e+07	6.47715e+07	2.96355e+07	3.07019e+07	2.49909e+07	4.42811e+07	4.3854e+07	46.86	6.63854e+07	6.52897e+07	10.83	0.67	-0.58	0.0379176	1.42	0.171246	1.45543	151.061	121.7	2	Down
M151T140	2.61981e+06	3.64792e+06	3.99639e+06	3.68243e+06	2.65993e+06	2.59883e+06	3.77271e+06	3.92546e+06	6.52166e+06	1.84573e+07	6.27961e+06	4.90013e+06	6.86423e+06	1.47352e+07	1.49578e+07	1.55317e+07	1.10309e+07	1.07997e+07	48.75	3.36294e+06	3.66518e+06	18.47	3.28	1.71	0.0001554	3.81	0.00610078	2.06167	151.061	140	2.3	Up
M151T302	3.9385e+06	1.32807e+06	1.93497e+06	4.07525e+06	1.34398e+06	902001	1.0787e+06	652382	1.61513e+06	5.70635e+06	1.36453e+06	4.3705e+06	7.06892e+06	6.63965e+06	4.96538e+06	4.22261e+06	4.49413e+06	4.66794e+06	46.9	1.90673e+06	1.33602e+06	70.78	2.36	1.24	0.004662	2.33	0.0475536	1.47354	151.097	302.3	5	Up
M151T353	1.00552e+06	955149	881399	931088	775980	559265	878251	1.19912e+06	1.3499e+06	1.11085e+06	1.34558e+06	993938	1.31931e+06	1.0721e+06	854887	955023	1.1252e+06	1.09147e+06	17.1	898221	906243	20.48	1.25	0.33	0.0498834	1.3	0.201689	1.32027	151.097	352.6	5.9	Up
M152T112	441569	711384	345682	912646	748459	255036	617612	409628	1.26035e+06	1.90951e+06	1.87837e+06	550450	722554	771254	616974	763389	1.05911e+06	767321	52.6	555252	529591	40.93	1.91	0.93	0.0379176	1.42	0.171246	1.428	152.082	112.1	1.9	Up
M152T398	3.54298e+06	3.22295e+06	2.71199e+06	2.18289e+06	5.02776e+06	2.02061e+06	3.98913e+06	3.9082e+06	1.38337e+07	2.42701e+06	6.26288e+06	8.3119e+06	5.7227e+06	5.81481e+06	3.59633e+06	4.09591e+06	6.25815e+06	5768755	56.83	3.32581e+06	3.38297e+06	30.32	1.88	0.91	0.0206682	1.68	0.117429	1.38505	152.107	397.6	6.6	Up
M152T417	24822	136554	17382.8	17735.6	5749.93	4415.38	14730	9662.67	55407.3	100032	460186	363420	31036.6	38096.2	20771.2	306203	171894	77719.9	102.46	28881.6	16056.4	152.45	5.95	2.57	0.004662	2.33	0.0475536	1.56213	152.034	416.6	6.9	Up
M152T620	5.21735e+06	904065	790052	7.28592e+06	543166	682392	1.97493e+06	3.81119e+06	1.2855e+07	1.50704e+07	8.6543e+06	6.40752e+06	1.20615e+07	4.51965e+06	4.51763e+06	1.67349e+07	1.01026e+07	1.03579e+07	47.06	2.65113e+06	1.4395e+06	95.32	3.81	1.93	0.0029526	2.53	0.0361958	1.83153	152.017	620.1	10.3	Up
M153T122	1.32115e+08	1.10705e+08	1.15511e+08	1.21272e+08	1.0291e+08	8.06244e+07	2.39101e+08	9.83841e+07	3.53387e+08	8.4171e+08	1.2751e+08	2.65528e+08	3.71441e+08	4.52353e+08	4.87528e+08	6.06056e+08	4.38189e+08	4.11897e+08	49.67	1.25078e+08	1.13108e+08	38.87	3.5	1.81	0.000621601	3.21	0.0140919	1.99316	153.041	121.9	2	Up
M153T318	4.93982e+06	7.53102e+06	9.07308e+06	1.04305e+07	7.48403e+06	9.46958e+06	9.16465e+06	9.09695e+06	1.07467e+07	3.21581e+07	1.63124e+07	1.61533e+07	1.50035e+07	1.23693e+07	2.72989e+07	3.45564e+07	2.05748e+07	1.62329e+07	45.28	8.3987e+06	9.08501e+06	20.3	2.45	1.29	0.0001554	3.81	0.00610078	1.95515	153.041	318.1	5.3	Up
M153T90	3.05473e+06	7.63632e+06	6.68413e+06	4.89138e+06	6.30535e+06	4.55806e+06	1.24184e+07	6.80555e+06	3.66481e+06	1.23882e+06	2.44968e+06	2.85711e+06	1.92674e+06	1.72632e+06	1.68413e+06	2.73778e+06	2.28567e+06	2.18821e+06	34.53	6.54425e+06	6.49474e+06	42.71	0.35	-1.52	0.0003108	3.51	0.00894927	2.0575	153.076	90.1	1.5	Down
M154T111	439262	458162	504729	528330	510622	432588	719897	591790	776686	2.81474e+06	933513	463108	880868	1.64212e+06	1.9703e+06	2.15352e+06	1.45436e+06	1.28782e+06	56.24	523173	507676	18.19	2.78	1.48	0.0029526	2.53	0.0361958	1.81505	154.097	111.2	1.9	Up
M154T400	3.53923e+08	1.21356e+08	1.77695e+08	3.882e+08	4.36647e+08	1.95061e+08	1.36249e+08	2.33654e+08	4.40898e+08	3.27033e+08	4.77452e+08	4.09015e+08	4.9758e+08	5.36489e+08	4.95549e+08	1.64652e+08	4.18584e+08	4.59175e+08	28.98	2.55348e+08	2.14358e+08	47.39	1.64	0.71	0.0206682	1.68	0.117429	1.40951	154.042	399.5	6.7	Up
M154T72	4.65311e+06	4.54847e+06	4.61341e+06	4.60156e+06	4.32599e+06	4.01324e+06	5.06884e+06	4.70974e+06	4.93183e+06	5.34723e+06	5.04303e+06	4.59415e+06	4.94662e+06	4.66527e+06	4.76999e+06	4.998e+06	4.91202e+06	4.93923e+06	4.85	4.5668e+06	4.60748e+06	6.66	1.08	0.11	0.0379176	1.42	0.171246	1.38505	154.036	71.8	1.2	Up
M155T77	436048	126865	607886	253463	1.32746e+06	453313	223575	1.01033e+06	2.08272e+06	1.56892e+06	1.92383e+06	1.99486e+06	1.5503e+06	2.10033e+06	1.96135e+06	1.79571e+06	1.87225e+06	1.94259e+06	11.48	554867	444680	75.1	3.37	1.75	0.0001554	3.81	0.00610078	2.0808	155.079	77.3	1.3	Up
M156T400	1.0756e+08	3.567e+08	9.60048e+07	8.93734e+07	2.11815e+07	5.52452e+07	7.98636e+07	7.70603e+07	1.11883e+08	1.63571e+08	2.96564e+08	3.03761e+08	1.18735e+08	9.6856e+07	9.30526e+07	1.63027e+08	1.68431e+08	1.40881e+08	50.81	1.10374e+08	8.46185e+07	93.38	1.53	0.61	0.0281274	1.55	0.141969	1.04742	156.039	399.5	6.7	Up
M156T427	302534	260443	316340	188961	899796	659714	180376	164604	1.64557e+06	1.97317e+06	1.3287e+06	2.06991e+06	2.0494e+06	2.9717e+06	2.83053e+06	4.33244e+06	2.40018e+06	2.05966e+06	39.77	371596	281489	71.56	6.46	2.69	0.0001554	3.81	0.00610078	2.25191	156.102	427.4	7.1	Up
M156T83	7.06492e+07	1.51987e+08	1.67734e+08	7.77142e+07	2.1388e+08	1.71493e+08	1.81187e+08	2.15535e+08	3.13014e+07	3.61926e+07	1.68851e+08	3.20626e+07	3.2077e+07	1.15474e+08	1.45993e+08	1.72401e+08	9.17942e+07	7.58331e+07	71.1	1.56272e+08	1.69613e+08	35.33	0.59	-0.77	0.0498834	1.3	0.201689	1.23239	156.077	82.8	1.4	Down
M157T90	116221	268145	155074	221716	477351	105767	1.79488e+06	301379	2.59986e+06	1.26039e+07	8.7099e+06	2.78721e+06	2.14934e+06	409890	3.45976e+06	3.50719e+06	4.52838e+06	3.12349e+06	89.22	430066	244931	131.25	10.53	3.4	0.000621601	3.21	0.0140919	2.00872	156.99	90.1	1.5	Up
M157T99	5.69311e+06	5.94686e+06	8.27147e+06	5.49428e+06	5.6667e+06	5.51078e+06	8.1207e+06	9.24808e+06	5.14952e+06	1.33155e+06	3.6983e+06	1.0115e+07	4.58789e+06	3.7358e+06	1.43916e+06	3.195e+06	4.15653e+06	3.71705e+06	66.42	6.744e+06	5.81999e+06	22.75	0.62	-0.7	0.0104118	1.98	0.0771942	1.44663	157.097	98.6	1.6	Down
M158T108	282302	291481	290433	318919	346736	163222	141761	274130	427947	4.19015e+06	360782	108506	308544	2.72919e+06	3.22586e+06	2.95423e+06	1.78815e+06	1.57857e+06	92.09	263623	286367	27.52	6.78	2.76	0.0206682	1.68	0.117429	1.42457	158.1	108.3	1.8	Up
M158T115_1	1.24675e+06	1.22703e+06	4.20776e+06	1.79211e+06	1.39586e+06	3.69544e+06	1.36267e+06	3.78271e+06	3.61835e+06	1.02344e+07	1.37917e+06	3.1239e+06	3.97067e+06	7.92202e+06	9.17147e+06	1.0084e+07	6.18799e+06	5.94635e+06	57.13	2.33879e+06	1.59399e+06	55.95	2.65	1.4	0.0379176	1.42	0.171246	1.53493	158.081	115.1	1.9	Up
M158T115_2	1.35059e+06	1.26221e+06	1.41552e+06	1.5224e+06	1.58343e+06	1.1921e+06	870461	1.05646e+06	1.53758e+06	2.52186e+06	2.01927e+06	796612	1.7097e+06	1.30704e+06	2.04966e+06	4.10135e+06	2.00539e+06	1.86449e+06	49.57	1.28164e+06	1.3064e+06	18.65	1.56	0.65	0.0498834	1.3	0.201689	1.173	158.118	115.1	1.9	Up
M158T375	145508	182933	145854	187714	190369	177684	180553	172092	219714	205671	263094	217976	247443	192662	157939	216296	215099	217136	14.95	172838	179118	10.23	1.24	0.32	0.004662	2.33	0.0475536	1.60973	158.064	374.9	6.2	Up
M158T634	1.03305e+07	1.04653e+07	1.0407e+07	1.09202e+07	1.77163e+07	1.27414e+07	8.98991e+06	1.2825e+07	1.85163e+07	2.52196e+07	1.58035e+07	2.1121e+07	1.09206e+07	1.1569e+07	1.22999e+07	1.45286e+07	1.62473e+07	1.5166e+07	31.07	1.17994e+07	1.06928e+07	22.99	1.38	0.46	0.0281274	1.55	0.141969	1.339	158.001	634	10.6	Up
M158T74_2	1.22915e+06	2.04181e+06	1.6156e+06	1.74797e+06	1.48834e+06	1.58408e+06	1.23247e+06	1.13264e+06	1.29105e+06	726952	1.16291e+06	1.25304e+06	663145	1.04333e+06	1.59197e+06	795420	1.06598e+06	1.10312e+06	30.14	1.50901e+06	1.53621e+06	20.27	0.71	-0.5	0.0379176	1.42	0.171246	1.53078	158.173	74.5	1.2	Down
M158T83	4.80436e+06	3.897e+06	6.5668e+06	5.72906e+06	5.33161e+06	4.55001e+06	7.86505e+06	6.21535e+06	1.81851e+06	2.42017e+06	564804	2.19456e+06	1.64292e+06	1.80914e+06	406186	1.74046e+06	1.57459e+06	1774803	45.74	5.6199e+06	5.53033e+06	22.47	0.28	-1.84	0.0001554	3.81	0.00610078	2.09526	158.093	83.3	1.4	Down
M159T397	1.53454e+07	7.67378e+06	3.79929e+06	1.72381e+07	6.57277e+06	4.70217e+06	1.50894e+07	1.31255e+07	2.58903e+07	2.19755e+07	1.95625e+07	2.20561e+07	2.6488e+07	8.85081e+06	1.38649e+07	2.81843e+07	2.0859e+07	2.20158e+07	31.81	1.04433e+07	1.03996e+07	51.02	2	1	0.00699301	2.16	0.0602244	1.57133	159.091	397.2	6.6	Up
M159T403	705240	2.21944e+06	918572	682050	1.58794e+07	356780	7.74723e+06	1.25928e+06	1.77243e+07	3.4813e+07	4.00294e+07	9.66609e+06	671948	8.96957e+06	1.90989e+07	1.95451e+07	1.88148e+07	1.84116e+07	70.1	3.721e+06	1.08892e+06	147.15	5.06	2.34	0.014763	1.83	0.0952789	1.61013	158.96	403.4	6.7	Up
M159T91	206069	498299	618618	243308	497613	468318	643493	124836	1.14185e+06	1.40132e+06	1.49001e+06	1.57882e+06	1.13968e+06	875438	762025	974719	1.17048e+06	1.14077e+06	25.35	412569	482966	47.39	2.84	1.5	0.0001554	3.81	0.00610078	1.96406	159.017	91	1.5	Up
M160T119	1.65609e+08	9.1882e+08	2.44175e+08	2.36775e+08	1.83043e+08	1.69856e+08	7.96885e+08	1.47678e+08	9.51823e+08	2.4689e+09	1.6585e+09	1.32728e+08	2.35778e+08	1.49771e+09	1.91524e+09	1.9102e+09	1.34636e+09	1.5781e+09	62.04	3.57855e+08	2.09909e+08	87.23	3.76	1.91	0.0379176	1.42	0.171246	1.43875	160.133	118.8	2	Up
M160T397_2	284468	266693	369857	1.01843e+06	174817	52803.5	315669	217629	1.67327e+06	6.13698e+06	4.25796e+06	1.467e+06	1.76689e+06	530873	1.28751e+06	3.67177e+06	2.59903e+06	1.72008e+06	73.07	337545	275581	86.37	7.7	2.94	0.0003108	3.51	0.00894927	1.99965	160.095	397	6.6	Up
M160T69	2.72542e+07	2.89237e+07	2.56923e+07	2.69241e+07	2.28639e+07	2.83542e+07	3.08581e+07	3.56343e+07	1.81392e+07	2.00366e+07	1.84843e+07	2.02824e+07	2.08575e+07	1.97998e+07	1.77985e+07	2.3056e+07	1.98068e+07	1.99182e+07	8.64	2.83131e+07	2.78042e+07	13.35	0.7	-0.52	0.0003108	3.51	0.00894927	2.14925	159.97	68.8	1.1	Down
M160T87	1.47281e+06	2.9372e+06	2.24439e+06	1.30943e+06	2.83459e+06	2.27767e+06	3.32118e+06	1.85481e+06	4.13486e+06	3.35668e+06	4.01186e+06	3.96962e+06	3.84082e+06	4.09505e+06	3.55616e+06	3.75777e+06	3.84035e+06	3.90522e+06	7.09	2.28151e+06	2.26103e+06	31.43	1.68	0.75	0.0001554	3.81	0.00610078	1.94052	160.097	87.4	1.5	Up
M161T127	3.25043e+06	2.4381e+06	3.35534e+06	3.57614e+06	2.66901e+06	6.09349e+06	792559	2.26743e+06	9.24669e+06	1.32869e+07	1.20863e+07	6.42182e+06	8.87201e+06	1.03342e+07	1.29143e+07	6.89821e+06	1.00075e+07	9.79042e+06	26.17	3.05531e+06	2.95972e+06	49.33	3.28	1.71	0.0001554	3.81	0.00610078	2.08465	161.003	127.4	2.1	Up
M161T34	1.70238e+07	1.63137e+07	1.76492e+07	1.99003e+07	1.58158e+07	1.64626e+07	1.78517e+07	1.59501e+07	1.36287e+07	1.8257e+07	1.57423e+07	1.56378e+07	1.46961e+07	1.49759e+07	1.38286e+07	1.69152e+07	1.54602e+07	1.53068e+07	10.05	1.71209e+07	1.67432e+07	7.87	0.9	-0.15	0.0281274	1.55	0.141969	1.35574	161.002	33.6	0.6	Down
M161T428	3.03427e+06	4.97315e+06	5.09521e+06	2.66967e+06	1.30841e+06	3.10981e+06	8.36759e+06	1.1811e+06	1.26913e+06	894552	1.14474e+06	854054	4.43822e+06	1.84546e+06	1.90523e+06	1.09126e+06	1.68033e+06	1.20693e+06	70.37	3.7174e+06	3.07204e+06	63.71	0.45	-1.15	0.0206682	1.68	0.117429	1.42736	161.107	427.8	7.1	Down
M161T433	152911	254986	179699	298141	243416	162698	151989	229576	176702	109401	175031	138039	160482	148820	161692	158651	153602	159567	14.24	209177	204638	26.23	0.73	-0.45	0.0379176	1.42	0.171246	1.46011	161.071	432.6	7.2	Down
M161T463	184205	238881	153587	359334	170620	124565	180274	200572	256773	357972	219012	318962	289066	240162	181435	389884	281658	272920	25.21	201505	182239	35.7	1.4	0.48	0.0281274	1.55	0.141969	1.31599	161.136	463.4	7.7	Up
M161T768	5.68577e+06	8.37884e+06	8.08046e+06	4.80505e+06	1.00237e+07	2.73688e+06	6.17108e+06	1.00929e+07	5.23346e+06	4.69127e+06	5.92146e+06	4.72109e+06	2.03222e+06	2.78257e+06	3.71118e+06	1.98601e+06	3.88491e+06	4.20122e+06	38.43	6.99683e+06	7.12577e+06	37.11	0.56	-0.85	0.014763	1.83	0.0952789	1.43605	161.096	767.6	12.8	Down
M161T77	8.89587e+06	3.68438e+06	4.57719e+06	7.15623e+06	9.81264e+06	2.63269e+06	5.98138e+06	7.6819e+06	9.38246e+06	1.29601e+07	1.01706e+07	1.09879e+07	4.14137e+06	1.18937e+07	9.52519e+06	1.37556e+07	1.03521e+07	1.05793e+07	28.61	6.30279e+06	6.56881e+06	40.26	1.64	0.72	0.0104118	1.98	0.0771942	1.41891	161.128	77.1	1.3	Up
M161T82	1.89074e+06	1.73666e+06	1.78851e+06	2.14506e+06	1.37922e+06	1.47829e+06	1.83867e+06	2.31886e+06	1.10346e+06	1.37954e+06	1.17625e+06	1.47608e+06	1.35175e+06	1.55735e+06	1.14476e+06	1.86655e+06	1.38197e+06	1.36565e+06	18.38	1.822e+06	1.81359e+06	17.09	0.76	-0.4	0.014763	1.83	0.0952789	1.62402	160.92	82.1	1.4	Down
M161T98	439723	5.13851e+06	979592	358094	3.77833e+06	1.05223e+06	5.67823e+06	4.72763e+06	5.76252e+06	1.00017e+07	5.36095e+06	4.02866e+06	6.37475e+06	8.46612e+06	1.0517e+07	9.66925e+06	7.52263e+06	7.42044e+06	32.53	2.76904e+06	2.41528e+06	82.26	2.72	1.44	0.0018648	2.73	0.0275628	1.68278	161.092	97.7	1.6	Up
M162T114	6.09511e+07	3.8375e+07	4.87943e+07	5.62946e+07	3.34925e+07	1.8003e+07	5.82525e+07	4.23536e+07	7.32729e+07	8.45286e+07	6.6079e+07	7.07869e+07	6.234e+07	5.61244e+07	3.94975e+07	9.94354e+07	6.90081e+07	6.8433e+07	26.14	4.45646e+07	4.5574e+07	32.66	1.55	0.63	0.0104118	1.98	0.0771942	1.42404	162.113	114.3	1.9	Up
M162T129	1.91715e+07	1.57724e+07	1.63089e+07	2.05078e+07	2.00909e+07	1.8709e+07	1.77232e+07	2.05195e+07	2.17448e+07	2.78172e+07	2.48744e+07	2.1413e+07	1.85983e+07	2.26373e+07	1.69664e+07	2.15353e+07	2.19483e+07	2.164e+07	15.4	1.86004e+07	1.89402e+07	9.93	1.18	0.24	0.0281274	1.55	0.141969	1.39043	162.113	129	2.1	Up
M162T34	2.63283e+07	1.73429e+07	2.46662e+07	2.00608e+07	1.7194e+07	1.60067e+07	2.7047e+07	2.39269e+07	1.89024e+07	8.97824e+06	1.29563e+07	1.28805e+07	1.8084e+07	1.48008e+07	1.26449e+07	1.88868e+07	1.47667e+07	1.38786e+07	24.27	2.15716e+07	2.19939e+07	20.58	0.68	-0.55	0.014763	1.83	0.0952789	1.65852	162.001	34.3	0.6	Down
M162T364	6.12009e+06	3.4048e+06	4.83782e+06	1.5058e+06	7.35742e+06	4.86176e+06	9.23878e+06	4.94276e+06	1.74079e+06	1.33274e+06	956517	2.73392e+06	2.82554e+06	4.96691e+06	322400	2.1491e+06	2.12849e+06	1.94494e+06	67.22	5.28366e+06	4.90226e+06	44.64	0.4	-1.31	0.014763	1.83	0.0952789	1.54664	162.004	364.1	6.1	Down
M162T73	125055	134133	133299	141283	220285	202432	168812	148650	113342	127091	133400	127673	120886	130144	122522	104400	122432	124807	7.8	159244	144966	22	0.77	-0.38	0.0029526	2.53	0.0361958	1.54832	162.453	73.3	1.2	Down
M163T127	3.33027e+07	1.35894e+07	4.39716e+07	1.01078e+07	5.05114e+07	4.63851e+07	5.06346e+07	3.18886e+07	5.67952e+07	1.2416e+08	4.32641e+07	4.613e+07	5.54066e+07	1.19433e+08	1.22901e+08	1.08417e+08	8.45634e+07	8.26062e+07	43.85	3.50489e+07	3.86372e+07	45.57	2.41	1.27	0.00699301	2.16	0.0602244	1.70589	162.998	126.8	2.1	Up
M163T212	3.89649e+06	2.14821e+07	2.64427e+06	5.29381e+06	2.24013e+06	2.16621e+06	2.1213e+06	2.03879e+06	6.97589e+06	1.11296e+08	3.42281e+06	2.42428e+06	2.31519e+06	1.02182e+08	1.08781e+08	9.12924e+07	5.35861e+07	4.91342e+07	99.99	5.23539e+06	2.4422e+06	127.27	10.24	3.36	0.0379176	1.42	0.171246	1.29557	162.996	211.8	3.5	Up
M163T230	7.08553e+07	5.0522e+07	4.50766e+07	8.45824e+07	3.52552e+07	4.20043e+07	5.53223e+07	7.60444e+07	1.26063e+08	9.84728e+07	1.43901e+08	1.15294e+08	3.36152e+07	1.15595e+08	7.40435e+07	1.35538e+08	1.05315e+08	1.15444e+08	34.43	5.74578e+07	5.29221e+07	30.84	1.83	0.87	0.0206682	1.68	0.117429	1.48793	162.996	229.8	3.8	Up
M163T280	1.51144e+06	4.42531e+06	537480	2.39912e+06	1.89223e+06	1.72231e+06	1.43078e+06	2.12378e+06	2.64844e+06	4.54627e+06	3.15049e+06	2.1301e+06	2.37354e+06	3.4818e+06	3.37445e+06	3.96493e+06	3.20875e+06	3.26247e+06	25.38	2.00531e+06	1.80727e+06	56.06	1.6	0.68	0.014763	1.83	0.0952789	1.38561	163.026	279.7	4.7	Up
M163T300	4.20576e+07	3.23852e+07	5.88102e+07	3.8143e+07	4.99569e+07	3.85484e+07	4.64679e+07	4.65196e+07	5.03963e+07	1.7203e+08	1.34609e+08	1.05955e+08	1.10073e+08	7.41284e+07	6.37952e+07	5.28516e+07	9.54798e+07	9.00416e+07	45.18	4.41111e+07	4.42628e+07	18.57	2.16	1.11	0.000621601	3.21	0.0140919	1.86193	163.001	299.9	5	Up
M163T448	214739	171572	196420	248974	292642	238161	193042	235198	236153	297962	254869	357077	265361	373211	365685	253378	300462	281662	18.84	223843	224969	17.07	1.34	0.42	0.004662	2.33	0.0475536	1.68287	163.09	447.9	7.5	Up
M163T573_1	2.33164e+06	732157	2.06611e+06	1.69818e+06	3.35933e+06	507388	792155	820317	2.3992e+06	5.61237e+06	5.02717e+06	2.35924e+06	817782	2.67772e+06	3.32114e+06	4.07155e+06	3.28577e+06	2.99943e+06	47.66	1.53841e+06	1.25925e+06	65.16	2.14	1.09	0.014763	1.83	0.0952789	1.42674	163.146	573.2	9.6	Up
M163T76_1	4.64635e+06	5.06099e+06	6.68737e+06	4.66331e+06	8.02573e+06	7.45492e+06	6.98947e+06	5.40965e+06	4.42174e+06	3.43833e+06	5.1366e+06	5.56555e+06	4.37802e+06	5.78789e+06	4.87741e+06	3.2811e+06	4.61083e+06	4.64957e+06	19.87	6.11722e+06	6.04851e+06	21.77	0.75	-0.41	0.0498834	1.3	0.201689	1.39572	163.084	75.9	1.3	Down
M164T35	7.7005e+06	1.07406e+07	1.01192e+07	6.08925e+06	1.26843e+07	9.00066e+06	1.02374e+07	1.0375e+07	1.07776e+07	1.04301e+07	1.33997e+07	1.19902e+07	1.13034e+07	1.02595e+07	1.08041e+07	1.16329e+07	1.13247e+07	1.10538e+07	9.05	9.61836e+06	1.01783e+07	20.93	1.18	0.24	0.0206682	1.68	0.117429	1.26224	163.997	35.1	0.6	Up
M165T101	822482	812908	837585	922352	911601	939194	882023	895301	1.04457e+06	1.15322e+06	1.06805e+06	931323	909733	943781	894223	914994	982487	937552	9.59	877931	888662	5.46	1.12	0.16	0.0206682	1.68	0.117429	1.5441	165.076	100.6	1.7	Up
M166T124	1.54864e+07	1.76192e+07	1.55367e+07	1.56979e+07	1.44037e+07	1.99555e+07	1.752e+07	1.80453e+07	1.80085e+07	2.01101e+07	2.23488e+07	1.81675e+07	2.15e+07	3.04699e+07	1.90567e+07	3.92746e+07	2.3617e+07	2.08051e+07	31.7	1.67831e+07	1.66089e+07	10.79	1.41	0.49	0.0018648	2.73	0.0275628	1.53399	166.058	124.4	2.1	Up
M166T137	57742.6	51817.1	308858	319656	252236	24346.7	47327.2	64512.9	103521	3.14914e+06	505505	273459	365586	1.77499e+06	2.9663e+06	1.1264e+06	1.28311e+06	815953	95.17	140812	61127.7	91.26	9.11	3.19	0.0029526	2.53	0.0361958	1.77926	165.998	136.5	2.3	Up
M166T139	6.34666e+06	7.54176e+06	8.25443e+06	6.66822e+06	9.7364e+06	1.19188e+07	7.95616e+06	7.1219e+06	5.44575e+06	4.70705e+06	6.28503e+06	6.93166e+06	5.21239e+06	9.48994e+06	7.2801e+06	3.96714e+06	6.16488e+06	5.86539e+06	28.28	8.19304e+06	7.74896e+06	22.42	0.75	-0.41	0.0281274	1.55	0.141969	1.33881	166.058	139.4	2.3	Down
M166T33	5.07108e+06	4.95883e+06	4.89224e+06	5.28588e+06	3.91018e+06	3.49941e+06	5.15585e+06	5.51072e+06	7.24109e+06	8.03871e+06	6.86813e+06	6.61378e+06	7.87407e+06	6.46462e+06	7.14702e+06	8.61886e+06	7.35828e+06	7.19405e+06	10.23	4.78552e+06	5.01495e+06	14.68	1.54	0.62	0.0001554	3.81	0.00610078	2.14903	165.981	33.1	0.6	Up
M166T332	6.08367e+06	6.56975e+06	5.3349e+06	5.47232e+06	6.51445e+06	5.71199e+06	7.28642e+06	7.13413e+06	5.42472e+06	4.26459e+06	4.62068e+06	5.89436e+06	4.2323e+06	5.83932e+06	5.07803e+06	3.06083e+06	4.80185e+06	4.84936e+06	19.93	6.26345e+06	6.29906e+06	11.74	0.77	-0.38	0.00699301	2.16	0.0602244	1.60684	166.073	331.5	5.5	Down
M166T497	436005	263253	333464	236098	422017	288070	349132	284797	585319	520685	634086	708365	715521	631859	526022	546373	608529	608589	12.66	326604	310767	22.28	1.86	0.9	0.0001554	3.81	0.00610078	2.21615	166.123	497.3	8.3	Up
M167T34	2.03371e+06	1.02533e+07	1.12245e+07	1.53156e+06	1.19464e+07	8.19292e+06	1.10164e+07	1.00721e+07	1.19826e+07	1.06073e+07	1.38683e+07	1.25156e+07	1.07783e+07	1.07843e+07	1.04589e+07	1.21029e+07	1.16373e+07	1.13834e+07	10.27	8.28386e+06	1.01627e+07	50.25	1.4	0.49	0.0379176	1.42	0.171246	1.14413	166.98	33.7	0.6	Up
M167T823	3.56928e+07	1.20124e+08	4.41979e+07	1.12742e+08	3.84342e+07	3.20305e+07	4.21262e+07	2.1716e+07	1.15507e+08	1.7866e+08	1.13323e+08	4.51116e+07	5.02149e+07	4.5931e+07	7.73064e+07	1.3859e+08	9.55804e+07	9.53147e+07	51.36	5.5883e+07	4.02802e+07	68.09	1.71	0.77	0.0206682	1.68	0.117429	1.14051	167.07	823.2	13.7	Up
M167T89	651864	498116	564960	735742	239916	480623	269123	221589	285329	4.02462e+06	578320	597780	508961	1.55543e+07	9.44507e+06	2.83079e+07	7.41278e+06	2.3112e+06	135.87	457742	489370	42.7	16.19	4.02	0.0379176	1.42	0.171246	1.41398	167.056	89.3	1.5	Up
M168T231	6.06411e+07	1.33523e+08	5.09955e+07	5.71207e+07	9.07407e+07	4.90059e+07	9.95771e+07	5.85792e+07	5.87161e+07	4.78435e+06	9.95551e+07	5.06948e+07	1.80904e+07	4.81966e+07	2.40389e+07	4.07015e+07	4.30972e+07	4.44491e+07	67.8	7.50229e+07	5.96102e+07	40.06	0.57	-0.8	0.0281274	1.55	0.141969	1.27927	167.975	231.1	3.9	Down
M168T472	2.11939e+08	1.94286e+08	1.75438e+08	1.04584e+07	1.81133e+08	2.0723e+08	1.92249e+08	1.84517e+08	1.11149e+07	3.18043e+07	3.07005e+07	9.85254e+06	1.06953e+07	5.80474e+06	1.02683e+07	2.19126e+07	1.65192e+07	1.09051e+07	61.62	1.69656e+08	1.88383e+08	38.62	0.1	-3.36	0.0029526	2.53	0.0361958	2.01269	167.975	472.2	7.9	Down
M168T62	1.3414e+08	1.61952e+08	1.40295e+08	1.44415e+08	1.39551e+08	1.19416e+08	1.83401e+08	1.33403e+08	1.34893e+08	1.07331e+08	1.28896e+08	1.3055e+08	1.27553e+08	1.26728e+08	1.13906e+08	1.2356e+08	1.24177e+08	1.2714e+08	7.36	1.44572e+08	1.39923e+08	13.63	0.86	-0.22	0.0104118	1.98	0.0771942	1.52051	167.976	62	1	Down
M168T690	1.06385e+06	678772	322422	1.37534e+06	159995	118002	641562	883215	1.82796e+06	1.48662e+06	2.13419e+06	1.35431e+06	3.09246e+06	620318	1.34163e+06	1.79977e+06	1.70716e+06	1.6432e+06	42.08	655395	660167	67.82	2.6	1.38	0.00699301	2.16	0.0602244	1.60667	167.975	689.9	11.5	Up
M168T77	4.13275e+06	4.32417e+06	3.72707e+06	2.3126e+06	3.82918e+06	3.33669e+06	5.23765e+06	3.56944e+06	2.25972e+06	2.07382e+06	645731	4.5877e+06	3.64226e+06	3.0817e+06	1.35666e+06	3.3757e+06	2.62791e+06	2.67071e+06	49.03	3.80869e+06	3.77812e+06	22.05	0.69	-0.54	0.0498834	1.3	0.201689	1.23628	168.077	76.7	1.3	Down
M169T115	2.99159e+06	876431	4.25586e+06	2.32605e+06	4.32115e+06	3.04487e+06	4.37404e+06	3.49139e+06	4.89599e+06	4.31279e+06	3.68476e+06	4.58718e+06	3.20556e+06	4.63248e+06	3.67361e+06	6.50122e+06	4.4367e+06	4.44999e+06	22.88	3.21017e+06	3.26813e+06	37.35	1.38	0.47	0.0379176	1.42	0.171246	1.20406	168.961	114.5	1.9	Up
M169T350	1.14046e+06	2.16428e+06	4.66905e+06	3.69478e+06	2.73488e+06	4.19274e+06	3.0484e+06	1.21278e+06	1.14271e+06	2.45045e+07	3.06042e+06	4.29178e+06	7.11216e+06	1.17137e+07	1.51463e+07	1.43882e+07	1.017e+07	9.41292e+06	76.74	2.85717e+06	2.89164e+06	45.73	3.56	1.83	0.0281274	1.55	0.141969	1.39923	169.097	349.6	5.8	Up
M169T464	31139.5	36944	35422.2	16502.1	43951.6	181990	73189.5	50749.4	71019.6	142035	441358	234333	101246	438416	490896	541432	307592	336375	62	58736	40447.8	89.27	5.24	2.39	0.0018648	2.73	0.0275628	1.93217	169.076	464	7.7	Up
M169T72	1.79539e+07	1.67974e+07	1.99369e+07	1.66599e+07	1.7243e+07	1.68692e+07	1.92982e+07	1.78981e+07	1.58609e+07	1.69567e+07	1.58103e+07	1.74189e+07	1.64476e+07	1.72075e+07	1.63203e+07	1.52458e+07	1.64085e+07	1.63839e+07	4.59	1.78321e+07	1.75706e+07	6.81	0.92	-0.12	0.0206682	1.68	0.117429	1.50526	169.046	71.7	1.2	Down
M170T101	1.42739e+06	454124	1.49268e+06	1.55304e+06	1.6544e+06	1.13758e+06	1.56319e+06	1.63048e+06	2.54565e+06	2.28076e+06	2.62057e+06	2.17834e+06	2.34991e+06	1.87483e+06	1.77909e+06	1.89209e+06	2.19015e+06	2.22955e+06	14.47	1.36411e+06	1.52286e+06	29.46	1.61	0.68	0.0001554	3.81	0.00610078	1.68343	170.081	100.8	1.7	Up
M170T173	2.18993e+06	1.80139e+06	1.91654e+06	1.80003e+06	2.27901e+06	1.78077e+06	1.89706e+06	3.12019e+06	1.76242e+06	2.10584e+06	1.43932e+06	1.16382e+06	1.24616e+06	1.75278e+06	1.61574e+06	1.50511e+06	1.5739e+06	1.56042e+06	19.37	2.09812e+06	1.9068e+06	21.59	0.75	-0.41	0.0029526	2.53	0.0361958	1.49497	170.065	172.6	2.9	Down
M170T397	2.48281e+06	2.55857e+06	2.51278e+06	3.87134e+06	1.91273e+06	2.78965e+06	2.31555e+06	2.41384e+06	3.81349e+06	5.35659e+06	3.24411e+06	4.01475e+06	4.04703e+06	7.2193e+06	5.69358e+06	5.99458e+06	4.92293e+06	4.70181e+06	27.52	2.60716e+06	2.4978e+06	21.81	1.89	0.92	0.000621601	3.21	0.0140919	1.99895	170.06	397.2	6.6	Up
M170T699	3.80388e+06	769988	1.87445e+06	361947	2.26892e+06	1.43998e+06	2.20849e+06	2.4061e+06	1.25207e+06	1.07615e+06	269867	420981	446085	1.85076e+06	514634	861619	836522	688127	64.05	1891719	2.04147e+06	56.39	0.44	-1.18	0.0379176	1.42	0.171246	1.27109	170.117	698.8	11.6	Down
M170T824	2.15545e+07	2.46126e+07	1.32881e+07	4.6586e+07	1.10127e+07	4.68526e+06	5.88817e+06	7.16951e+06	5.76934e+07	2.53633e+07	5.1696e+07	3.31687e+07	2.79559e+07	1.05813e+07	4.05777e+07	2.95262e+07	3.45703e+07	3.13474e+07	43.67	1.68496e+07	1.21504e+07	83.19	2.05	1.04	0.0206682	1.68	0.117429	1.40087	170.096	823.6	13.7	Up
M171T108	4.34451e+06	3.57403e+06	3.9726e+06	4.30067e+06	4.10286e+06	2.88299e+06	3.93523e+06	3.45562e+06	2.61744e+06	1.05318e+06	1.70947e+06	2.62653e+06	2.91109e+06	1.25984e+06	1.1635e+06	1.76383e+06	1.88811e+06	1.73665e+06	38.96	3.82106e+06	3.95392e+06	12.87	0.49	-1.02	0.0003108	3.51	0.00894927	2.0329	171.113	108.4	1.8	Down
M171T124	1.18977e+06	912609	1.82609e+06	752554	933586	674760	1.22243e+06	1.76537e+06	1.15157e+06	5.1312e+06	5.77465e+06	1.80627e+06	1.62279e+06	4.59351e+07	2.82682e+07	3.05769e+07	15033343	5.45293e+06	115.3	1.15965e+06	1.06168e+06	37.57	12.96	3.7	0.00699301	2.16	0.0602244	1.69379	171.149	124.4	2.1	Up
M171T629	1.50109e+06	1.51761e+06	1.16948e+06	2.26354e+06	1.30386e+06	1.78583e+06	1.26515e+06	1.3831e+06	1.73907e+06	2.61537e+06	2.50449e+06	3.9251e+06	3.04806e+06	1.54017e+06	2.15871e+06	3.85397e+06	2.67312e+06	2.55993e+06	33.32	1.52371e+06	1442093	23.23	1.75	0.81	0.0029526	2.53	0.0361958	1.7402	171.102	628.6	10.5	Up
M172T116	2.64652e+07	2.08511e+07	2.03432e+07	2.17086e+07	1.42093e+07	2.35696e+07	2.03173e+07	2.12363e+07	2.70633e+07	3.76259e+07	3.30017e+07	2.28961e+07	2.59485e+07	4.42446e+07	3.78276e+07	3.95842e+07	3.3524e+07	3.53138e+07	22.53	2.10876e+07	2.10437e+07	16.43	1.59	0.67	0.0010878	2.96	0.0203124	1.88396	172.097	116	1.9	Up
M172T126_1	223572	843355	201753	278589	212067	145635	205167	220375	373559	1.30511e+06	532052	3.03429e+06	947592	1.08147e+06	1.02063e+06	2.21486e+06	1.31369e+06	1.05105e+06	67.73	291314	216221	77.57	4.51	2.17	0.000621601	3.21	0.0140919	1.93153	171.977	125.9	2.1	Up
M172T126_2	1.28176e+06	1.41626e+06	1.26991e+06	1.40139e+06	1.58021e+06	242498	347795	1.04856e+06	2.47585e+06	1.56309e+06	2.99676e+06	1.86161e+06	1.59869e+06	1.35199e+06	1.31875e+06	1.39731e+06	1.82051e+06	1.58089e+06	33.35	1.07355e+06	1.27583e+06	46.99	1.7	0.76	0.0206682	1.68	0.117429	1.33273	172.153	125.6	2.1	Up
M172T137	9.96976e+06	5.72318e+06	5.68665e+06	1.10999e+07	7.014e+06	2.9802e+06	4.87646e+06	2.47222e+06	5.51663e+06	3.20222e+06	4.70435e+06	4.37535e+06	3.53203e+06	1.43232e+06	2.0154e+06	4.11295e+06	3.6114e+06	3.82249e+06	37.92	6.2278e+06	5.70491e+06	49.07	0.58	-0.79	0.0498834	1.3	0.201689	1.25502	171.977	136.9	2.3	Down
M172T33	2.40571e+06	3.28762e+06	2.61008e+06	2.81132e+06	2.51764e+06	3.4024e+06	1.69937e+06	3.61334e+06	2.13039e+06	1.44197e+06	2.29491e+06	2.10578e+06	1.99072e+06	1.79448e+06	2.14879e+06	1.9822e+06	1.98616e+06	2.04825e+06	13.32	2.79344e+06	2.7107e+06	22.42	0.71	-0.49	0.00699301	2.16	0.0602244	1.62147	171.994	32.6	0.5	Down
M172T815	1.59456e+07	2.75566e+07	1.19341e+07	2.18834e+07	4.24142e+06	4.59374e+06	1.38387e+07	2.07029e+07	7.15173e+06	1.02472e+06	2.78037e+06	1.62426e+07	5.9701e+06	5.96316e+06	3.57007e+06	4.64497e+06	5.91847e+06	5.30407e+06	77.97	1.50871e+07	1.48921e+07	54.5	0.39	-1.35	0.0498834	1.3	0.201689	1.5024	172.115	815.5	13.6	Down
M173T554	1.63933e+06	807145	1.03396e+06	877415	1.04398e+06	616015	1.28344e+06	1.5991e+06	1.84481e+06	2.29734e+06	1.92081e+06	1.1584e+06	1.79896e+06	1.28902e+06	1.59032e+06	2.54133e+06	1.80512e+06	1.82189e+06	25.9	1.11255e+06	1.03897e+06	33.1	1.62	0.7	0.00699301	2.16	0.0602244	1.67676	173.085	553.9	9.2	Up
M174T450	1.70446e+06	4.11862e+06	2.3176e+06	4.23086e+06	1.40017e+06	1.80692e+06	1.62405e+06	2.73681e+06	3.08636e+06	607110	885127	1.84394e+06	617863	821822	1.5894e+06	1.43507e+06	1.36084e+06	1.1601e+06	61.52	2.49244e+06	2.06226e+06	44.97	0.55	-0.87	0.0379176	1.42	0.171246	1.48933	174.055	449.6	7.5	Down
M174T565	255341	110986	132318	220990	330508	131100	217832	193396	331603	935324	418158	248068	133155	141807	334739	477021	377485	333171	67.81	199059	205614	37.08	1.9	0.92	0.0379176	1.42	0.171246	1.19541	174.059	565	9.4	Up
M174T824	1.46795e+07	9.53001e+06	2.1617e+07	599743	9.0665e+06	1.24846e+07	2.03517e+07	1.38178e+07	3.00047e+06	3.34017e+06	755635	2.84241e+06	4.98385e+06	7.99042e+06	1.58997e+06	3.75991e+06	3.53285e+06	3.17032e+06	62.67	1.27684e+07	1.31512e+07	52.36	0.28	-1.85	0.0104118	1.98	0.0771942	1.34739	174.128	824.3	13.7	Down
M175T102	89653.7	396419	347821	1.51266e+06	40656.4	38529.3	1.14983e+06	2.39507e+06	4.79025e+06	1.04535e+06	1.45944e+06	2.02697e+06	4.67262e+06	3.44169e+06	1.46335e+06	7.98895e+06	3.36108e+06	2.73433e+06	70.72	746329	372120	115.26	4.5	2.17	0.0104118	1.98	0.0771942	1.66919	174.972	102.1	1.7	Up
M175T280	1.09477e+06	1.20238e+06	2.37503e+06	947634	749014	582487	1.50924e+06	1.48579e+06	2.52262e+06	2.85094e+06	3.59953e+06	2.4747e+06	3.33792e+06	2.211e+06	2.52368e+06	2.99755e+06	2.81474e+06	2.68731e+06	16.85	1.24329e+06	1.14858e+06	45.12	2.26	1.18	0.0003108	3.51	0.00894927	2.03973	174.534	280.1	4.7	Up
M175T387	68037.2	42258.7	63013.4	55562.2	117303	84194.8	93029.5	71370.7	726903	1.35353e+06	1.38735e+06	492037	450581	1.33397e+06	854619	1.03366e+06	954082	944142	40.14	74346.2	69703.9	31.55	12.83	3.68	0.0001554	3.81	0.00610078	2.40904	175.06	386.6	6.4	Up
M175T447	195049	501947	241628	554303	323654	292792	246822	153341	138974	40182.4	250478	106346	88062.2	88256.7	163171	134700	126271	120523	49.85	313692	269807	45.61	0.4	-1.31	0.0029526	2.53	0.0361958	1.80507	175.03	446.8	7.4	Down
M175T652	1.49057e+06	906723	817903	219049	1.00834e+06	592142	2.38746e+06	2.26549e+06	896340	274906	66985.8	725422	339737	433130	204512	452598	424204	386434	64.24	1.21096e+06	957533	64.19	0.35	-1.51	0.014763	1.83	0.0952789	1.4501	175.096	652.1	10.9	Down
M175T758	6.53198e+06	7.83682e+06	7.84859e+06	3.83028e+06	1.43872e+07	1.83552e+07	9.69849e+06	5.90423e+06	2.13748e+06	2.18355e+06	4.70319e+06	4.04778e+06	3.23319e+06	8.65014e+06	5.02645e+06	3.14716e+06	4.14112e+06	3.64049e+06	50.9	9.2991e+06	7.8427e+06	51.64	0.45	-1.17	0.0104118	1.98	0.0771942	1.62553	175.112	757.6	12.6	Down
M176T106	6.19151e+06	625581	666089	1.34381e+07	408865	325108	360670	237853	1.29463e+07	9.38082e+06	1.54339e+07	306569	7.20431e+06	2.96607e+06	1.36074e+07	1.39491e+07	9.4743e+06	1.11635e+07	58.66	2.78172e+06	517223	170.96	3.41	1.77	0.0379176	1.42	0.171246	1.45872	176.092	106.5	1.8	Up
M176T115	1.21563e+06	5.04934e+06	978054	761976	1.72119e+06	1.90788e+06	1.27983e+06	944764	201998	791362	925273	2.15915e+06	192292	217189	208245	221536	614631	219363	112.38	1.73233e+06	1.24773e+06	80.57	0.35	-1.49	0.014763	1.83	0.0952789	1.65709	176.092	115.2	1.9	Down
M177T100	256512	239480	205977	238136	256380	215571	242422	328161	338367	1.59276e+06	1.12142e+06	680148	188274	1.05042e+06	2.64382e+06	2.59366e+06	1.27611e+06	1.08592e+06	73.75	247830	240951	14.93	5.15	2.36	0.0104118	1.98	0.0771942	1.83362	177.065	100	1.7	Up
M177T110	2.7804e+06	995824	699205	3.31396e+06	2.03319e+06	1.90845e+06	906128	745988	604179	626391	1.76487e+06	573435	493845	1.62903e+06	694960	814630	900168	660676	55.75	1.67289e+06	1.45214e+06	59.6	0.54	-0.89	0.0206682	1.68	0.117429	1.20444	177.132	110.4	1.8	Down
M177T328	1.12147e+06	2.29454e+06	2.72436e+06	1.49663e+06	2.31481e+06	2.35126e+06	2.17987e+06	2.5894e+06	3.22004e+06	6.2674e+06	3.58674e+06	3.36954e+06	3.3042e+06	4.54213e+06	4.55786e+06	4.83851e+06	4.2108e+06	4.06444e+06	25	2.13404e+06	2.30468e+06	25.64	1.97	0.98	0.0001554	3.81	0.00610078	2.0254	177.106	327.7	5.5	Up
M177T78	674746	1.65232e+06	1.7544e+06	623624	1.69033e+06	1.50168e+06	1.80875e+06	1.69961e+06	1.76406e+06	1.85281e+06	1.96518e+06	2.20544e+06	1.95259e+06	1.74106e+06	1.75743e+06	1.72275e+06	1.87016e+06	1.80843e+06	8.83	1.42568e+06	1.67132e+06	34.2	1.31	0.39	0.004662	2.33	0.0475536	1.26121	177.061	77.9	1.3	Up
M177T80	4.39241e+06	4.14839e+06	6.03088e+06	4.45047e+06	4.86803e+06	5.63645e+06	7.24693e+06	5.69504e+06	3.93142e+06	4.73077e+06	5.02316e+06	4.20413e+06	4.06233e+06	3.79076e+06	3.4719e+06	4.41332e+06	4.20347e+06	4.13323e+06	12.04	5.30857e+06	5.25224e+06	19.69	0.79	-0.34	0.0206682	1.68	0.117429	1.46297	176.936	80.1	1.3	Down
M178T428	1.59261e+06	1.84752e+06	1.84097e+06	2.50921e+06	1.83249e+06	1.27493e+06	1.81617e+06	2.44635e+06	1.13134e+06	802569	1.01973e+06	1.49079e+06	973390	998604	768496	993906	1.02235e+06	996255	21.8	1.89503e+06	1.83673e+06	21.6	0.54	-0.89	0.0003108	3.51	0.00894927	2.10405	178.086	427.8	7.1	Down
M178T619	580760	694230	1.34273e+06	909543	1.37153e+06	974697	1.01781e+06	1.59571e+06	1.30557e+06	1.90301e+06	1.37132e+06	1.12367e+06	1.62925e+06	1.51897e+06	1.39033e+06	1.05825e+06	1.41255e+06	1.38083e+06	19.32	1.06088e+06	996255	33.02	1.33	0.41	0.0498834	1.3	0.201689	1.37127	178.036	618.7	10.3	Up
M179T116	351009	309799	304821	398041	391161	239933	346732	206687	221380	210801	266745	198860	158036	330756	217414	260357	233044	219397	22.41	318523	328266	21.36	0.73	-0.45	0.0281274	1.55	0.141969	1.50187	179.082	115.6	1.9	Down
M179T72	298295	349703	2.60789e+06	2.19178e+06	347264	380156	2.43298e+06	2.39276e+06	2.59658e+06	3.35828e+06	6.64322e+06	5.92103e+06	8.43605e+06	1.91993e+06	308757	3.62748e+06	4.10142e+06	3.49288e+06	65.65	1.3751e+06	1.28597e+06	80.6	2.98	1.58	0.0379176	1.42	0.171246	1.29132	179.496	71.8	1.2	Up
M179T767	3.66657e+06	8.17745e+06	1.32172e+07	4.00658e+06	4.63772e+06	1.57297e+07	1.85268e+07	4.21638e+06	8.19378e+06	3.7456e+06	1.26582e+06	1.07125e+07	3.13507e+06	2.18373e+06	1.02619e+06	2.12934e+06	4.04901e+06	2.6594e+06	86.85	9.02231e+06	6.40759e+06	66.21	0.45	-1.16	0.0281274	1.55	0.141969	1.39391	179.107	767.4	12.8	Down
M180T107	2.51281e+06	1.30603e+06	2.65836e+06	1.95097e+06	1.0939e+06	1.19077e+06	2.77904e+06	2.26326e+06	779113	152729	495049	2.484e+06	608062	1.29153e+06	279894	487288	822207	551556	91.84	1.96939e+06	2.10712e+06	35	0.42	-1.26	0.00699301	2.16	0.0602244	1.69972	180.069	107.4	1.8	Down
M180T114	1.04232e+06	245031	183131	1.34437e+06	1.76825e+06	120529	1.64581e+06	195094	822386	1.87542e+06	1.58214e+06	1.92303e+06	327003	1.97085e+06	2.39996e+06	1.49205e+06	1.54911e+06	1.72878e+06	43.47	818067	643678	86.7	1.89	0.92	0.0379176	1.42	0.171246	1.2275	180.069	113.6	1.9	Up
M180T690	613013	694428	1.36897e+06	981737	1.38151e+06	1.08465e+06	422253	1.48979e+06	1.7871e+06	2.89313e+06	1.84803e+06	2.1076e+06	1.80397e+06	2.32601e+06	2.27791e+06	895866	1.99245e+06	1.97782e+06	28.88	1.00454e+06	1.0332e+06	39.57	1.98	0.99	0.0029526	2.53	0.0361958	1.76742	180.175	689.9	11.5	Up
M180T83	3.25902e+06	1.54689e+06	2.59416e+06	327728	2.65688e+06	1.88813e+06	2.7818e+06	1.91396e+06	5.06413e+06	4.95899e+06	4.1769e+06	4.11641e+06	3.97696e+06	4.37056e+06	4.18205e+06	5.66975e+06	4.56447e+06	4.27631e+06	13.11	2.12107e+06	2.25406e+06	43.23	2.15	1.11	0.0001554	3.81	0.00610078	1.72571	179.982	83.2	1.4	Up
M180T92	3.84513e+06	4.20872e+06	3.90404e+06	3.42429e+06	3.25726e+06	3.28062e+06	4.93968e+06	3.80029e+06	3.38535e+06	1.56962e+06	2.62917e+06	4.59075e+06	3.72118e+06	3.0518e+06	2.2486e+06	2.79051e+06	2.99837e+06	2.92115e+06	30.86	3.83251e+06	3.82271e+06	14.55	0.78	-0.35	0.0379176	1.42	0.171246	1.31625	179.63	91.6	1.5	Down
M181T115_2	93145.7	248266	258857	85713.1	236305	201103	255949	220421	412177	638803	584688	333119	259463	321716	347976	382873	410102	365424	32.43	199970	228363	35.43	2.05	1.04	0.0001554	3.81	0.00610078	1.81349	181.053	115	1.9	Up
M181T319	20123.2	34931	35703.1	43441.8	134543	24792.4	33359.5	29866.8	1.94284e+06	6.2703e+06	2.9801e+06	32501.5	1.39129e+06	629357	3.34111e+06	2.37902e+06	2.37081e+06	2.16093e+06	81.54	44595.1	34145.3	83.04	53.16	5.73	0.0029526	2.53	0.0361958	2.11283	181.064	319.5	5.3	Up
M181T461	348404	966144	1.53227e+06	156658	332515	80585.6	1.25145e+06	1.11319e+06	4.89976e+06	1.54704e+07	3.82287e+06	126071	2.07074e+06	8.54146e+06	1.1574e+07	1.75186e+06	6.03215e+06	4.36131e+06	88.87	722652	657274	77.08	8.35	3.06	0.00699301	2.16	0.0602244	1.54152	181.097	460.5	7.7	Up
M181T655	97342.8	244704	602038	164413	772539	978896	280837	565616	655068	3.15364e+06	3.14446e+06	1.14174e+06	464598	569344	1.90579e+06	1.22131e+06	1.53199e+06	1.18152e+06	71.73	463298	423227	68.04	3.31	1.73	0.014763	1.83	0.0952789	1.64585	181.159	655.4	10.9	Up
M181T690	614827	513999	654354	202713	754496	660707	540091	422712	406802	1.25157e+06	922685	846063	1.31625e+06	755695	911321	1.07909e+06	936184	917003	30.91	545487	577459	31.54	1.72	0.78	0.00699301	2.16	0.0602244	1.52453	181.159	689.9	11.5	Up
M181T70	1.03926e+06	861493	985684	762732	838507	705902	926390	864460	1.1615e+06	1.14721e+06	1.16474e+06	1.09806e+06	1.00091e+06	1.01442e+06	916195	1.12651e+06	1.07869e+06	1.11229e+06	8.45	873054	862976	12.6	1.24	0.31	0.0029526	2.53	0.0361958	1.79519	180.621	70	1.2	Up
M181T752	5.27778e+06	4.0414e+06	4.53701e+06	3.2203e+06	3.17454e+06	2.1694e+06	4.53667e+06	4.15885e+06	6.48634e+06	6.13348e+06	6.55465e+06	5.94667e+06	6.81986e+06	5.55289e+06	4.70462e+06	5.81201e+06	6.00132e+06	6.04008e+06	11.18	3.88949e+06	4100128	25.3	1.54	0.63	0.0003108	3.51	0.00894927	1.85702	181.122	752.4	12.5	Up
M181T770	2.46448e+06	3.02622e+06	1.81555e+06	3.75823e+06	1.64324e+06	1.61436e+06	2.10126e+06	2.87017e+06	4.76444e+06	4.87882e+06	3.3813e+06	3.45489e+06	5.32735e+06	3.35206e+06	2.49887e+06	5.43005e+06	4.13597e+06	4.10966e+06	26.44	2.41169e+06	2.28287e+06	31.66	1.71	0.78	0.004662	2.33	0.0475536	1.71713	181.159	770.5	12.8	Up
M182T291	2.47265e+06	2.03447e+06	2.24026e+06	1.89141e+06	1.70346e+06	1.43152e+06	2.43619e+06	2.8199e+06	2.97583e+06	2.04369e+06	3.14315e+06	2.99586e+06	2.28653e+06	2.48843e+06	2.15333e+06	2.77248e+06	2.60741e+06	2.63046e+06	16.15	2.12873e+06	2.13737e+06	21.27	1.22	0.29	0.0498834	1.3	0.201689	1.25068	182.103	291.2	4.9	Up
M182T597	1.92298e+07	1.55827e+07	1.50769e+07	1.93314e+07	1.27536e+07	4.83566e+06	2.19493e+07	1.85708e+07	3.16705e+07	2.30161e+07	2.97827e+07	2.13993e+07	2.7628e+07	2.05752e+07	1.76409e+07	2.15329e+07	2.41557e+07	2.22745e+07	20.47	1.59163e+07	1.70767e+07	33.56	1.52	0.6	0.00699301	2.16	0.0602244	1.39988	182.118	596.7	9.9	Up
M182T83	1.16887e+07	1.30322e+07	1.26087e+07	1.2115e+07	1.15768e+07	1.37554e+07	1.34363e+07	1.13596e+07	1.14099e+07	7.43534e+06	1.42805e+07	1.02132e+07	1.10696e+07	6.34501e+06	6.02959e+06	6.91114e+06	9.2118e+06	8.82427e+06	32.25	1.24466e+07	1.23619e+07	7.24	0.74	-0.43	0.014763	1.83	0.0952789	1.55979	181.961	82.9	1.4	Down
M183T124	1.44206e+08	9.34723e+07	5.58075e+07	9.16e+07	1.29559e+08	6.85567e+07	1.38705e+08	7.12592e+07	6.1803e+07	4.62048e+07	7.4155e+07	6.03482e+07	4.67744e+07	9.84332e+07	4.54194e+07	4.75734e+07	6.00889e+07	5.39608e+07	30.9	9.91456e+07	9.25362e+07	34.52	0.61	-0.72	0.0206682	1.68	0.117429	1.57304	183.084	124.4	2.1	Down
M183T134	6.16243e+06	5.7446e+06	9.87889e+06	5.60883e+06	5.77325e+06	7.153e+06	7.6964e+06	6.6119e+06	7.93377e+06	3.66152e+07	9.94423e+06	1.01359e+07	1.12046e+07	2.2083e+07	2.36261e+07	2.2935e+07	1.80597e+07	1.66438e+07	55.11	6.82866e+06	6.38717e+06	21.03	2.64	1.4	0.0003108	3.51	0.00894927	1.86338	182.985	133.6	2.2	Up
M183T140	1.05038e+08	9.1709e+07	2.85303e+07	9.11858e+07	1.01065e+08	1.00089e+08	1.09871e+08	9.65337e+07	7.18527e+07	4.44795e+07	8.35202e+07	9.27758e+07	6.8139e+07	5.59681e+07	3.69183e+07	3.29827e+07	6.08296e+07	6.20536e+07	35.96	9.05028e+07	9.83113e+07	28.54	0.67	-0.57	0.0206682	1.68	0.117429	1.1266	183.083	139.6	2.3	Down
M183T648	495024	721023	1.51855e+06	1.19422e+06	804758	1.3412e+06	1.72415e+06	897075	1.52018e+06	1.5568e+06	3.17756e+06	1.54448e+06	3.43961e+06	2.28731e+06	4.13325e+06	2.11239e+06	2.47145e+06	2.19985e+06	40.35	1.087e+06	1.04565e+06	39.16	2.27	1.19	0.0010878	2.96	0.0203124	1.84218	183.138	647.5	10.8	Up
M183T72	3.55029e+06	3.73744e+06	3.89763e+06	4.28162e+06	3.91306e+06	4.03471e+06	4.07054e+06	4.0955e+06	4.60269e+06	5.43652e+06	4.41133e+06	4.41875e+06	4.52228e+06	4.44698e+06	4.72095e+06	4.81199e+06	4.67144e+06	4.56248e+06	7.31	3.9476e+06	3.97388e+06	5.76	1.18	0.24	0.0001554	3.81	0.00610078	2.0339	182.962	71.6	1.2	Up
M183T730	674869	562425	636221	657571	1.84814e+06	419996	1.88153e+06	1.26411e+06	2.27417e+06	4.18776e+06	7.03478e+06	1.5443e+06	1.71335e+06	824798	3.93847e+06	1.9264e+06	2.9305e+06	2.10028e+06	69.12	993107	666220	59.56	2.95	1.56	0.00699301	2.16	0.0602244	1.69477	183.102	730.1	12.2	Up
M183T744	940330	1.25156e+06	1.43274e+06	1.22836e+06	1.12071e+06	1.32132e+06	1.43324e+06	1.05288e+06	1.47123e+06	1.56013e+06	1.48711e+06	1.24827e+06	1.49891e+06	1.33159e+06	1.32165e+06	1.49989e+06	1.42735e+06	1.47917e+06	7.76	1.22264e+06	1.23996e+06	14.43	1.17	0.22	0.0104118	1.98	0.0771942	1.43334	183.174	744.3	12.4	Up
M183T772	2.65129e+08	2.49218e+08	1.60554e+08	6.02616e+08	4.23263e+08	2.40597e+08	1.8656e+08	1.08675e+08	9.93656e+07	1.45149e+08	2.15358e+08	9.25894e+07	9.26414e+07	3.76083e+08	1.24155e+08	1.81423e+08	1.65846e+08	1.34652e+08	57.75	2.79577e+08	2.44908e+08	57.31	0.59	-0.75	0.0498834	1.3	0.201689	1.18006	182.986	771.5	12.9	Down
M183T82	2.74551e+06	3.5831e+06	2.8002e+06	3.32114e+06	2.56959e+06	2.41396e+06	2.91587e+06	2.13279e+06	6.5391e+06	7.29427e+06	6.77268e+06	7.23873e+06	6.08568e+06	5.45508e+06	5.84603e+06	7.02052e+06	6.53151e+06	6.65589e+06	10.36	2.81027e+06	2.77285e+06	16.73	2.32	1.22	0.0001554	3.81	0.00610078	2.3513	182.902	81.9	1.4	Up
M184T140	67364.6	196306	54922.8	307507	1.10803e+06	228861	70701.8	154208	454409	613091	479309	705957	592948	1.17726e+06	2.22045e+06	1.12819e+06	921452	659524	64.32	273488	175257	127.5	3.37	1.75	0.0029526	2.53	0.0361958	1.82048	184.086	140.1	2.3	Up
M184T191	1.40981e+06	306892	803785	339329	220427	261737	321599	1.32369e+06	279504	1.61631e+06	1.46131e+06	377643	1.70209e+06	1.30473e+06	1.42073e+06	2.02471e+06	1.27338e+06	1.44102e+06	48.9	623409	330464	79.2	2.04	1.03	0.0281274	1.55	0.141969	1.26385	184.085	191.4	3.2	Up
M184T291	2.30272e+06	2.67728e+06	3.56963e+06	2.12824e+06	3.54772e+06	3.57209e+06	3.32408e+06	2.2966e+06	1.65164e+06	1.14084e+06	1.83035e+06	1.80883e+06	1.72231e+06	2.15111e+06	2.38379e+06	1.12401e+06	1.72661e+06	1.76557e+06	25.35	2.9273e+06	3.00068e+06	21.83	0.59	-0.76	0.0018648	2.73	0.0275628	1.86547	184.06	291.4	4.9	Down
M184T346	1.84765e+06	2.19687e+06	1.52236e+06	1.96612e+06	1.07858e+06	1.42443e+06	1.97033e+06	1.33638e+06	953707	726525	658294	560599	873105	948134	1.28664e+06	1.59922e+06	950778	910620	36.16	1.66784e+06	1.685e+06	23	0.57	-0.81	0.0029526	2.53	0.0361958	1.85002	184.108	346.3	5.8	Down
M184T362	3.22674e+06	561197	3.37666e+06	3.35127e+06	618487	3.60521e+06	2.71734e+06	2.69037e+06	7.56531e+06	1.99165e+07	8.98905e+06	7.63885e+06	9.63977e+06	8.45549e+06	1.28034e+07	9.16359e+06	1.05215e+07	9.07632e+06	39.31	2.51841e+06	2.97204e+06	48.91	4.18	2.06	0.0001554	3.81	0.00610078	2.04114	184.17	362.4	6	Up
M184T416	108109	224126	208417	16309.7	439770	220762	340153	312086	456099	372235	650752	107467	414849	566185	463269	391121	427747	435474	37.29	233716	222444	56.92	1.83	0.87	0.0206682	1.68	0.117429	1.18678	184.17	416.4	6.9	Up
M184T465	215443	620063	840100	308826	318341	594888	1.56419e+06	412612	4.03416e+06	4.23767e+06	3.44878e+06	1.47514e+06	1.64609e+06	1.81693e+06	2.67855e+06	2.69297e+06	2.75379e+06	2.68576e+06	39	609308	503750	71.65	4.52	2.18	0.0003108	3.51	0.00894927	2.11375	184.06	465	7.8	Up
M184T644	874685	308880	365396	964341	107160	62865	527064	904286	2.51259e+06	3.33319e+06	1.57882e+06	1.21246e+06	2.45358e+06	769820	1.57625e+06	3.9119e+06	2.16858e+06	2.0162e+06	49.8	514335	446230	70.43	4.22	2.08	0.0010878	2.96	0.0203124	1.82087	184.133	643.8	10.7	Up
M184T72	264025	1.27827e+06	277043	1.02475e+06	259169	243355	344414	482430	578563	1.18305e+06	1.41647e+06	1.42673e+06	1.50771e+06	1.18667e+06	296682	1.43098e+06	1.12836e+06	1.30157e+06	39.75	521682	310729	77.05	2.16	1.11	0.0104118	1.98	0.0771942	1.44545	183.963	71.7	1.2	Up
M184T777	1.32976e+06	740375	491978	1.16112e+06	346296	391302	896236	1.08486e+06	2.37155e+06	3.34742e+06	1.58853e+06	1.46831e+06	2.31512e+06	1.25109e+06	1.13399e+06	3.26348e+06	2092437	1.95183e+06	41.76	805242	818305	46.29	2.6	1.38	0.0010878	2.96	0.0203124	1.8341	184.17	777.4	13	Up
M184T824	1.22345e+07	1.94801e+07	1.02259e+07	3.04048e+07	8.03971e+06	3.58461e+06	4.50836e+06	5.53397e+06	2.18819e+07	1.57359e+07	4.06963e+07	2.33849e+07	4.21534e+07	7.88903e+06	2.66287e+07	2.24463e+07	2.51021e+07	2.29156e+07	46.18	1.17515e+07	9.13279e+06	77.58	2.14	1.09	0.0281274	1.55	0.141969	1.44458	184.075	823.5	13.7	Up
M185T102	364392	342274	328801	320093	527180	431986	271389	314646	508102	830139	237550	472108	687324	909112	563425	833478	630155	625375	36.03	362595	335538	22.33	1.74	0.8	0.0206682	1.68	0.117429	1.52698	184.956	102	1.7	Up
M185T111	3.73046e+06	4.67041e+06	3.7442e+06	2.93013e+06	3.53651e+06	911455	3.49125e+06	3.18442e+06	3.38616e+06	3.45247e+06	5.6963e+06	4.14366e+06	5.8522e+06	4.9476e+06	6.70886e+06	3.89792e+06	4.76065e+06	4.54563e+06	25.88	3.27486e+06	3.51388e+06	33.06	1.45	0.54	0.0379176	1.42	0.171246	1.23352	185.092	110.8	1.8	Up
M185T356	794458	114033	522107	118328	118833	80912.4	127601	335372	727366	1.62969e+06	504238	970628	576569	286054	241707	763584	712479	651967	62.23	276456	123217	93.61	2.58	1.37	0.0281274	1.55	0.141969	1.56366	185.1	356.5	5.9	Up
M185T372	266570	632706	484288	455476	525031	431516	275729	440562	2.02395e+06	2.4778e+06	1.97734e+06	1.6083e+06	703321	2.28847e+06	1.07796e+06	1.52131e+06	1.70981e+06	1.79282e+06	35.32	438985	448019	27.73	3.89	1.96	0.0001554	3.81	0.00610078	2.20597	185.129	371.8	6.2	Up
M186T364	7.36877e+06	1.03712e+07	5.03994e+06	1.7645e+07	1.30376e+07	1.16584e+07	1.31452e+07	1.0329e+07	3.55361e+07	2.38875e+07	1.88692e+07	5.45484e+06	1.83661e+07	1.25261e+07	1.80457e+07	1.98057e+07	1.90614e+07	1.86177e+07	45.42	1.10744e+07	1.10148e+07	34.61	1.72	0.78	0.0206682	1.68	0.117429	1.2143	186.076	364.3	6.1	Up
M186T369	498109	606816	965176	566420	800755	411758	1.16444e+06	1.05115e+06	3.28444e+06	919842	2.46364e+06	1.2006e+06	2.08053e+06	1.05941e+06	1.50337e+06	1.7846e+06	1.78705e+06	1.64399e+06	44.83	758078	703785	36.74	2.36	1.24	0.0018648	2.73	0.0275628	1.84853	186.185	369	6.2	Up
M186T468	123790	32879.3	24394	576291	105227	43537.6	89544.6	59303.1	543079	1.5937e+06	902198	152795	300695	154397	940741	446365	629246	494722	78.39	131871	74423.9	138.79	4.77	2.25	0.0029526	2.53	0.0361958	1.80153	186.149	468.2	7.8	Up
M186T750	4.94956e+06	5.93596e+06	7.06353e+06	4.02375e+06	4.27543e+06	1.2805e+07	5.55185e+06	8.30426e+06	1.21496e+07	7.5056e+06	1.49396e+07	2.59966e+07	1.54458e+07	8.6387e+06	4.84869e+06	1.18778e+07	1.26753e+07	1.20137e+07	51.25	6.61366e+06	5.74391e+06	43.49	1.92	0.94	0.0281274	1.55	0.141969	1.4493	186.222	750.1	12.5	Up
M187T112	2.44699e+06	4.49291e+06	2.82676e+06	2.66428e+06	8.93355e+06	2.35073e+07	2.96661e+06	4.55392e+06	3.93129e+06	6.59193e+07	8.85e+06	1.77027e+07	1.4221e+07	2.10114e+07	3.97815e+07	1.42961e+07	2.32142e+07	1.59994e+07	87.26	6.54904e+06	3.72976e+06	109.52	3.54	1.83	0.0206682	1.68	0.117429	1.6301	187.108	112.5	1.9	Up
M187T548	662513	413443	1.12001e+06	228414	1.39927e+06	1.1221e+06	828615	1.12969e+06	1.54232e+06	1.39316e+06	1.45881e+06	1.28021e+06	545668	1.22834e+06	1.18774e+06	1.47746e+06	1.26421e+06	1.33668e+06	25.03	863007	974310	46.72	1.46	0.55	0.0206682	1.68	0.117429	1.20079	187.097	548.3	9.1	Up
M187T65	3.04194e+06	3.1002e+06	3.20881e+06	3.01032e+06	3.03764e+06	2.73357e+06	3.32538e+06	3.54145e+06	3.87349e+06	3.14498e+06	3.41094e+06	3.43677e+06	3.6086e+06	4.16911e+06	3.66069e+06	3.80744e+06	3.639e+06	3.63465e+06	8.71	3124912	3.07107e+06	7.67	1.16	0.22	0.0029526	2.53	0.0361958	1.75429	187.126	65.1	1.1	Up
M188T397	1.09393e+09	6.65866e+08	1.14269e+09	7.89065e+08	9.63652e+08	9.43273e+08	3.97639e+08	7.22282e+08	4.60111e+08	2.96726e+08	8.72965e+08	8.83678e+08	5.83611e+08	4.64331e+08	3.34247e+08	7.18827e+08	5.76812e+08	5.23971e+08	39.62	8.398e+08	8.66169e+08	29.32	0.69	-0.54	0.0498834	1.3	0.201689	1.22474	188.071	397.2	6.6	Down
M188T549	714389	470743	1.17947e+06	330772	315733	388586	385494	341054	619541	1.6639e+06	1.511e+06	517540	477462	1.27674e+06	1.02771e+06	405473	937421	823627	53.37	515780	387040	57.7	1.82	0.86	0.0206682	1.68	0.117429	1.28349	188.164	549	9.2	Up
M188T585	103871	41736.5	337846	200930	601710	500262	189814	61317.7	802571	4.53178e+06	2.87389e+06	110195	1.24172e+06	192228	877942	1.02291e+06	1.45665e+06	950426	103.38	254686	195372	81.32	5.72	2.52	0.014763	1.83	0.0952789	1.51958	188.165	584.7	9.7	Up
M188T76	771771	1.08738e+06	537372	1.38644e+06	689095	1.19282e+06	8.18343e+06	1.39664e+06	57722.3	53873.7	191636	185381	61499.5	266790	133647	246784	149667	159514	57.5	1.90562e+06	1.1401e+06	134.16	0.08	-3.67	0.0001554	3.81	0.00610078	2.12254	188.176	75.9	1.3	Down
M189T114	492325	477143	495583	573704	570862	665447	1.03981e+06	468667	449202	172102	276188	458770	347733	201571	228616	249632	297977	262910	36.75	597942	533222	31.86	0.5	-1	0.0001554	3.81	0.00610078	1.93941	188.948	114.4	1.9	Down
M189T120	3.78939e+06	2.84957e+06	3.63493e+06	1.94816e+06	4.34602e+06	3.19401e+06	3.03783e+06	2.10233e+06	6.36517e+06	1.08143e+07	5.84338e+06	6.31919e+06	5.04913e+06	5.51189e+06	6.07944e+06	6.99213e+06	6.62183e+06	6.19932e+06	27.06	3.11278e+06	3.11592e+06	26.35	2.13	1.09	0.0001554	3.81	0.00610078	2.11126	189.123	120.4	2	Up
M189T125	1.59732e+07	1.71072e+07	1.77609e+07	1.69331e+07	1.7718e+07	1.61434e+07	2.27113e+07	1.98104e+07	1.79179e+07	2.72016e+07	1.83754e+07	1.79448e+07	1.85787e+07	2.07211e+07	1.816e+07	2.39193e+07	2.03524e+07	1.8477e+07	16.96	1.80197e+07	1.74126e+07	12.43	1.13	0.18	0.0281274	1.55	0.141969	1.03428	188.987	125.2	2.1	Up
M189T397	5.87545e+07	272143	3.43693e+07	2.74593e+07	4.69023e+07	4.30093e+07	4.81661e+07	1.61631e+07	6.70244e+07	9.96807e+07	6.71977e+07	8.7676e+07	8.90655e+07	5.19178e+07	4.11658e+07	6.43194e+07	7.10059e+07	6.7111e+07	27.95	3.4387e+07	3.86893e+07	55.6	2.06	1.05	0.0029526	2.53	0.0361958	1.19589	189.074	397.2	6.6	Up
M189T82	8.66826e+07	7.4008e+07	8.43506e+07	7.48591e+07	9.47892e+07	7.37873e+07	9.67894e+07	8.52908e+07	1.19356e+08	1.52534e+08	1.18296e+08	9.46585e+07	1.09058e+08	9.45112e+07	1.01163e+08	9.0878e+07	1.10057e+08	1.0511e+08	18.45	8.38196e+07	8.48207e+07	10.83	1.31	0.39	0.004662	2.33	0.0475536	1.77558	189.16	81.7	1.4	Up
M190T106_1	279778	371871	583988	208846	617873	468565	611527	482527	622127	723995	876846	663862	553217	554351	468711	613461	634571	617794	19.64	453122	475546	34.07	1.4	0.49	0.0281274	1.55	0.141969	1.41218	190.082	105.6	1.8	Up
M190T106_2	2.06095e+07	2.83153e+07	3.13757e+07	3.22325e+07	4.01632e+07	4.05984e+07	4.03298e+07	3.76377e+07	1.33315e+07	1.37766e+07	1.57853e+07	1.45525e+07	1.55447e+07	1.19192e+07	1.18225e+07	1.7172e+07	1.4238e+07	1.41646e+07	13.29	3.39078e+07	3.49351e+07	21.04	0.42	-1.25	0.0001554	3.81	0.00610078	2.28005	190.144	106.2	1.8	Down
M190T116	1.79681e+07	2.54894e+07	6.89528e+06	7.20135e+06	7.86955e+06	8.0608e+06	6.63558e+06	6.37858e+06	4.83696e+07	3.85591e+07	5.24627e+07	7.64231e+07	4.94076e+07	3.34092e+07	3.44408e+07	3.83347e+07	4.64258e+07	4.34643e+07	30.35	1.08123e+07	7.53545e+06	65.24	4.29	2.1	0.0001554	3.81	0.00610078	2.19709	190.107	116	1.9	Up
M190T261	762226	788879	939007	537695	1.37848e+06	987405	1.37866e+06	2.22176e+06	2.01062e+06	2.2495e+06	2.17665e+06	2.28065e+06	2.48115e+06	1.77555e+06	1.87584e+06	1.61642e+06	2.0583e+06	2.09363e+06	14.1	1.12426e+06	963206	47.24	1.83	0.87	0.0029526	2.53	0.0361958	1.91207	190.033	260.6	4.3	Up
M190T454	205716	136865	205720	186375	155124	136313	217684	208750	209823	290026	259961	248267	217887	204966	242699	304535	247271	245483	14.78	181568	196046	18.59	1.36	0.45	0.0029526	2.53	0.0361958	1.75757	190.097	454.4	7.6	Up
M190T566	270375	250670	54263	1.16627e+06	826047	407351	782976	816403	2.16676e+06	2.55874e+06	704514	786629	548051	912620	1.84679e+06	1.83899e+06	1.42039e+06	1.37581e+06	54.16	571794	595163	66.47	2.48	1.31	0.0379176	1.42	0.171246	1.45242	190.071	565.6	9.4	Up
M191T323	3.08268e+07	3.15073e+07	5.55331e+07	3.24039e+07	2.08172e+07	3.11603e+07	5.6791e+07	4.16986e+07	3.93238e+06	388622	3.07578e+06	3.73885e+07	2.16702e+07	5.31252e+07	1.83015e+07	2.95417e+07	2.0928e+07	1.99858e+07	88.82	3.75923e+07	3.19556e+07	33.94	0.56	-0.85	0.0498834	1.3	0.201689	1.23509	190.996	323.1	5.4	Down
M191T62	6.96644e+07	7.31604e+07	7.99512e+07	8.40505e+07	7.50053e+07	8.26021e+07	8.61714e+07	7.93053e+07	8.87091e+07	1.09108e+08	8.92079e+07	8.528e+07	8.83937e+07	8.70777e+07	8.74186e+07	8.99052e+07	9.06375e+07	8.85514e+07	8.38	7.87388e+07	7.96283e+07	7.24	1.15	0.2	0.0003108	3.51	0.00894927	1.76046	190.992	62	1	Up
M191T633	1.78372e+07	2.89921e+06	1.16032e+07	9.13497e+06	7.22892e+06	1.3941e+07	1.10442e+07	2.03621e+07	2.31313e+07	1.21958e+07	1.03951e+07	2.68048e+07	2.08843e+07	3.0527e+07	1.71391e+07	1.529e+07	1.95459e+07	1.90117e+07	36.16	1.17564e+07	1.13237e+07	47.92	1.66	0.73	0.0379176	1.42	0.171246	1.33347	190.996	633.3	10.6	Up
M191T690	5.36855e+06	4.08949e+06	6.56636e+06	9.78255e+06	4.25037e+06	1.02246e+07	5.7071e+06	6.32536e+06	1.48466e+07	6.86976e+06	1.23626e+07	8.12756e+06	2.01063e+07	6.12284e+06	9.23687e+06	1.60665e+07	1.17174e+07	1.07997e+07	42.47	6.5393e+06	6.01623e+06	35.37	1.79	0.84	0.0206682	1.68	0.117429	1.50766	190.996	689.6	11.5	Up
M191T810_2	1.36132e+06	1.06743e+06	1.17403e+06	1.09066e+06	584082	342406	1.23397e+06	1.01174e+06	1.81126e+06	1.59316e+06	1.24529e+06	1.50147e+06	1.60386e+06	1.14513e+06	1.25612e+06	1.25967e+06	1.427e+06	1.38057e+06	16.37	983204	1.07904e+06	35.06	1.45	0.54	0.004662	2.33	0.0475536	1.34878	191.179	810.4	13.5	Up
M192T105	1.59669e+06	1.85855e+06	1.75028e+06	1.13383e+06	1.50103e+06	955516	2.68845e+06	1.84255e+06	4.0793e+06	1.76402e+07	4.88511e+06	3.65236e+06	3.29027e+06	5.31475e+06	7.62858e+06	5.04275e+06	6.44167e+06	4.96393e+06	73.23	1.66586e+06	1.67348e+06	31.61	3.87	1.95	0.0001554	3.81	0.00610078	2.08475	192.056	104.5	1.7	Up
M192T334	1.10241e+06	4.18155e+06	2.9397e+06	5.05127e+06	3.33093e+06	2.11294e+06	3.38618e+06	3.58481e+06	295616	41118	2.24443e+06	2.97772e+06	3.46428e+06	1.68707e+06	1.22544e+06	1.6636e+06	1.69991e+06	1.67534e+06	70.29	3.21122e+06	3.35856e+06	37.66	0.53	-0.92	0.0498834	1.3	0.201689	1.16106	192.066	333.8	5.6	Down
M192T363	96567.2	2.31842e+07	1.68127e+07	5.67773e+06	2.45267e+07	2.08094e+07	2.35466e+07	7.88799e+06	2.70962e+06	76915	460926	943641	8.93805e+06	6.7367e+06	1.17447e+07	1.38215e+06	4.12409e+06	2.04589e+06	107.47	1.53177e+07	1.8811e+07	61.77	0.27	-1.89	0.0379176	1.42	0.171246	1.0397	192.138	363.2	6.1	Down
M192T378	118524	1.98926e+06	370706	10099	288758	12656.7	455779	220375	1.92671e+06	3.22258e+06	1.93574e+06	360855	1.92566e+06	283017	1.12593e+06	1.8249e+06	1.57568e+06	1.87528e+06	61.15	433270	254567	149.75	3.64	1.86	0.0379176	1.42	0.171246	1.52691	192.033	377.6	6.3	Up
M192T418	283975	699106	343549	1.95158e+06	1.89081e+06	399677	2.00202e+06	410402	1.40937e+07	2.96697e+07	2.63857e+07	4.36778e+06	2.33766e+07	7.79767e+06	3.44916e+07	2.41641e+07	2.05433e+07	2.37703e+07	52	997640	554754	79.88	20.59	4.36	0.0001554	3.81	0.00610078	2.25831	192.068	417.9	7	Up
M192T78	6.38961e+06	2.34679e+06	2.41713e+06	4.6719e+06	2.29051e+06	1.98231e+06	2.60804e+06	1.57142e+06	3.29496e+06	7.94583e+06	6.80511e+06	6.84409e+06	3.06347e+06	3.89121e+06	5.73232e+06	7.40114e+06	5.62226e+06	6.26871e+06	34.56	3.03472e+06	2.38196e+06	53.97	1.85	0.89	0.00699301	2.16	0.0602244	1.56788	192.08	77.9	1.3	Up
M193T122	2.32328e+07	4.43112e+07	1.39847e+07	1.98167e+07	2.34308e+07	1.36024e+07	1.66494e+06	1.96124e+07	3.50288e+07	6.90893e+07	9.03497e+07	3.60123e+07	3.96097e+07	4.06762e+07	6.3128e+07	3.68561e+07	5.13438e+07	4.01429e+07	39.9	1.9957e+07	1.97145e+07	60.68	2.57	1.36	0.0029526	2.53	0.0361958	1.61131	193.067	121.9	2	Up
M193T173	4.48467e+06	3.69526e+06	1.16962e+06	4.32382e+06	4.15664e+06	843280	1.17278e+06	4.54808e+06	5.67403e+06	6.46752e+06	5.85042e+06	6.84614e+06	5.6779e+06	6.2256e+06	4.87056e+06	6.54274e+06	6.01936e+06	6.03801e+06	10.48	3.04927e+06	3.92595e+06	54.73	1.97	0.98	0.0001554	3.81	0.00610078	1.65902	193.068	172.6	2.9	Up
M193T551	519678	670102	1.13414e+06	462748	399068	415350	397968	698997	326960	490470	304106	586184	319035	321723	482071	211495	380256	324342	32.85	587257	491213	42.66	0.65	-0.63	0.0498834	1.3	0.201689	1.34061	193.097	551.2	9.2	Down
M194T106	9.19031e+06	2.98097e+07	1.44216e+07	1.02207e+07	2.19886e+07	3.60151e+06	2.2889e+07	1.3446e+07	6.70723e+06	2.25125e+06	2.52738e+06	1.11217e+07	2.58679e+06	2.72022e+06	2.55341e+06	2.0248e+06	4.0616e+06	2.5701e+06	79.44	1.56959e+07	1.39338e+07	54.69	0.26	-1.95	0.0018648	2.73	0.0275628	1.90735	194.048	105.6	1.8	Down
M194T114	7.67663e+06	6.6925e+06	7.10089e+06	1.3019e+07	6.78573e+06	6.74857e+06	1.2566e+07	9.24187e+06	1.10534e+06	1.48076e+06	439918	1.00707e+06	1.38838e+06	273664	942405	915798	944167	974737	44.21	8.7289e+06	7.38876e+06	30.31	0.11	-3.21	0.0001554	3.81	0.00610078	2.34	193.994	114.4	1.9	Down
M194T160	2.98046e+07	1.33807e+07	2.9188e+07	9.42037e+06	3.09555e+07	2.16649e+07	3.01374e+07	1.78289e+07	8.607e+06	4.23716e+06	4.25064e+06	1.12014e+07	1.27847e+07	2.02203e+07	4.42264e+06	1.51968e+07	1.01151e+07	9.9042e+06	57.87	2.27975e+07	2.54264e+07	37.22	0.44	-1.17	0.00699301	2.16	0.0602244	1.65378	194.118	160.1	2.7	Down
M194T313	2.1449e+08	1.48206e+08	1.42548e+08	1.82481e+08	1.88894e+08	1.26271e+08	3.06905e+08	1.927e+08	6.49319e+07	8.67178e+07	9.11692e+07	4.08703e+07	5.55438e+07	2.90394e+07	5.75928e+07	5.70015e+07	6.03583e+07	5.72971e+07	34.68	1.87812e+08	1.85688e+08	30.09	0.32	-1.64	0.0001554	3.81	0.00610078	2.18401	194.117	313	5.2	Down
M194T84	3.11226e+06	2.29904e+06	2.75457e+06	2.04328e+06	2.03057e+06	2.09596e+06	2.4972e+06	2.50673e+06	2.72217e+06	2.93711e+06	3.09677e+06	3.43993e+06	3.29229e+06	3.36867e+06	2.89078e+06	3.28609e+06	3.12923e+06	3.19143e+06	8.24	2.41745e+06	2.39812e+06	15.77	1.29	0.37	0.0029526	2.53	0.0361958	1.87337	194.102	84.4	1.4	Up
M195T325	458806	412027	586199	473364	380371	469105	457833	439530	647734	641176	534468	449376	598618	565105	651001	485641	571640	581862	13.46	459654	458319	13.07	1.24	0.31	0.0104118	1.98	0.0771942	1.63795	195.076	325.1	5.4	Up
M195T461	237994	380345	233490	261817	196997	1.09692e+06	382827	318438	1.09582e+06	3.71769e+06	2.38245e+06	2.41978e+06	506570	3.83086e+06	3.35108e+06	1.45922e+06	2.34543e+06	2.40112e+06	53.05	388603	290128	75.73	6.04	2.59	0.000621601	3.21	0.0140919	2.08372	195.113	460.5	7.7	Up
M195T698	4.4846e+06	2.82472e+06	1.47399e+06	4.64543e+06	936224	625208	3.35794e+06	4.14055e+06	4.54982e+06	6.12875e+06	3.24499e+06	4.87331e+06	4.70787e+06	3.81035e+06	4.23561e+06	8.71363e+06	5.03304e+06	4.62885e+06	33.95	2.81108e+06	3.09133e+06	57.54	1.79	0.84	0.0206682	1.68	0.117429	1.37945	195.138	698.4	11.6	Up
M195T72_1	902893	892844	892986	874104	894945	778294	972434	1.00504e+06	1.07445e+06	913119	1.00601e+06	989402	1.03771e+06	1.21213e+06	1.05197e+06	1.09125e+06	1.047e+06	1.04484e+06	8.31	901692	893966	7.48	1.16	0.22	0.0010878	2.96	0.0203124	1.77379	194.925	71.8	1.2	Up
M195T72_2	2.79835e+06	1.79299e+06	1.66457e+06	1.90253e+06	1.81383e+06	1.79483e+06	1.86079e+06	2.2194e+06	2.88456e+06	3.92176e+06	3.55927e+06	3.21815e+06	1.82607e+06	1.69449e+06	2.74861e+06	3.32417e+06	2.89714e+06	3.05135e+06	27.33	1.98091e+06	1.83731e+06	18.53	1.46	0.55	0.0379176	1.42	0.171246	1.53211	195.025	71.9	1.2	Up
M195T730	931734	185550	1.64461e+06	848307	1.07413e+06	485776	2.63328e+06	1.80676e+06	1.25096e+06	3.15358e+06	1.49773e+07	3.3902e+06	1.99031e+06	1.52026e+06	3.0213e+06	2.31595e+06	3.95249e+06	2.66862e+06	114.4	1.20127e+06	1.00293e+06	65.78	3.29	1.72	0.0104118	1.98	0.0771942	1.53907	195.138	729.8	12.2	Up
M196T402	767277	4.73959e+06	4.01602e+06	2.50026e+06	3.28218e+06	3.90143e+06	5.68974e+06	4.91099e+06	1.93037e+06	2.40906e+07	6.98078e+06	4.4653e+06	7.36135e+06	1.48029e+07	2.10806e+07	1.42931e+07	1.18756e+07	1.08272e+07	67.25	3.72593e+06	3.95872e+06	41.65	3.19	1.67	0.0206682	1.68	0.117429	1.48788	196.133	401.6	6.7	Up
M196T437	44523.3	12094.8	62413.5	70808.2	41726.7	53622.7	38150.3	45766	133168	243109	116570	81754.9	90884.4	181284	273838	221966	167822	157226	43.42	46138.2	45144.7	38.2	3.64	1.86	0.0001554	3.81	0.00610078	2.04566	196.091	436.9	7.3	Up
M196T668	91877.6	71898.4	235834	62971.3	59419.8	70960.2	393025	124425	318937	441466	562312	471506	151299	419461	463830	423604	406552	432535	30.31	138801	81888	85.06	2.93	1.55	0.0010878	2.96	0.0203124	1.90983	196.097	668.3	11.1	Up
M196T823	1.86607e+07	1.69755e+07	1.68316e+07	6.89955e+07	8.25102e+06	5.92353e+06	7.66532e+06	8.78103e+06	6.88015e+07	2.2149e+07	2.68397e+07	1.63092e+07	2.98329e+07	9.29977e+06	6.44211e+07	9.86604e+07	4.20392e+07	2.83363e+07	74.86	1.90105e+07	1.28063e+07	109.4	2.21	1.14	0.0498834	1.3	0.201689	1.20989	196.105	823.2	13.7	Up
M196T97	5.0016e+06	5.08264e+06	4.57202e+06	6.4835e+06	4.49072e+06	3.17351e+06	5.00376e+06	3.7887e+06	4.81615e+06	2.37529e+06	4.48468e+06	4.36748e+06	3.35448e+06	2.17531e+06	3.55229e+06	4.56313e+06	3.7111e+06	3.95988e+06	27.46	4.69956e+06	4.78681e+06	20.87	0.79	-0.34	0.0498834	1.3	0.201689	1.18497	196.009	97.2	1.6	Down
M197T114_1	1.73425e+06	2.12153e+06	1.85851e+06	1.82202e+06	2.06694e+06	1.78491e+06	1.66413e+06	1.55024e+06	2.23421e+06	2.13741e+06	1.85464e+06	1.98185e+06	2.10504e+06	1.95241e+06	1.90636e+06	1.82523e+06	1.99964e+06	1.96713e+06	7.27	1.82531e+06	1.80346e+06	10.53	1.1	0.13	0.0498834	1.3	0.201689	1.16661	196.956	114.5	1.9	Up
M197T74	67229.9	79168.6	19063.6	88199.9	61428.6	121251	86628.8	48151.4	88746.6	132616	150562	153743	100237	163705	161488	95061.7	130770	141589	24.05	71390.2	73199.3	42.54	1.83	0.87	0.0010878	2.96	0.0203124	1.59894	196.928	73.6	1.2	Up
M198T102_1	1.42398e+06	1.35803e+06	1.37658e+06	1.23004e+06	1.51923e+06	1.8891e+06	1.6255e+06	1.45203e+06	1.15996e+06	1.24212e+06	1.3689e+06	1.43923e+06	1.1273e+06	402294	1.32524e+06	963027	1.12851e+06	1.20104e+06	29.23	1.48431e+06	1.438e+06	13.52	0.76	-0.4	0.0104118	1.98	0.0771942	1.21003	197.988	102	1.7	Down
M198T105	1.48069e+06	2.5412e+06	402198	2.28848e+06	1.53364e+06	1.81964e+06	1.13799e+06	1.58564e+06	313304	1.23378e+06	895133	1.4653e+06	532147	941296	769250	256630	800854	832192	53.07	1.59868e+06	1.55964e+06	41.46	0.5	-1	0.0104118	1.98	0.0771942	1.35754	198.06	104.6	1.7	Down
M198T122	8.36389e+06	6.84618e+06	8.20562e+06	5.84919e+06	7.67019e+06	7.60254e+06	6.84504e+06	6.78584e+06	5.14887e+06	5.94076e+06	4.41099e+06	5.49778e+06	7.41925e+06	4.28682e+06	4.4735e+06	5.77365e+06	5.36895e+06	5.32332e+06	19.47	7.27106e+06	7.22436e+06	11.57	0.74	-0.44	0.0029526	2.53	0.0361958	1.821	198.088	122	2	Down
M198T611	1.4902e+07	1.34351e+06	1.684e+06	8.69634e+06	3.23597e+06	1.68525e+07	2.77967e+06	3.47359e+06	1.91411e+06	1.96037e+06	3.02216e+06	723060	1.17002e+06	1.08524e+07	487109	487950	2.57714e+06	1.54206e+06	134.13	6.62095e+06	3.35478e+06	93.09	0.39	-1.36	0.0498834	1.3	0.201689	1.24133	198.149	611.5	10.2	Down
M199T108	510062	379905	399974	366626	90830.4	59724.5	340012	274909	418833	350199	710948	357517	527434	586375	520500	725941	524719	523967	27.77	302755	353319	51.26	1.73	0.79	0.014763	1.83	0.0952789	1.32494	199.047	108.2	1.8	Up
M199T137	1.51212e+07	1.94238e+07	1.81257e+07	1.50399e+07	2.14937e+07	2.41152e+07	1.462e+07	1.81971e+07	9.60011e+06	1.00426e+07	1.49256e+07	1.40038e+07	1.15705e+07	2.50468e+07	1.80226e+07	1.22811e+07	1.44367e+07	1.31425e+07	35.26	1.82671e+07	1.81614e+07	18.46	0.79	-0.34	0.0379176	1.42	0.171246	1.17589	198.971	136.5	2.3	Down
M199T323	2.00916e+06	1.78131e+06	3.17717e+06	1.03461e+06	3.54009e+06	3.59712e+06	1.39914e+06	2.5296e+06	2.32486e+06	2.52019e+06	1.09257e+06	1.19286e+06	1.11038e+06	644042	778362	734938	1.29977e+06	1.10147e+06	55.57	2.38352e+06	2.26938e+06	41.21	0.55	-0.87	0.0281274	1.55	0.141969	1.41405	199.108	323.2	5.4	Down
M199T91	721312	563788	668077	571198	498011	539733	611258	591194	682336	677998	743132	716951	639721	754046	605290	643439	682864	680167	7.69	595571	581196	11.97	1.15	0.2	0.0206682	1.68	0.117429	1.47982	199.047	90.8	1.5	Up
M200T400_2	2.92918e+09	2.28812e+09	1.89499e+09	2.9534e+09	1.1267e+09	8.00361e+08	3.07301e+09	3.24127e+09	5.6227e+09	5.34098e+09	4.14226e+09	4.08781e+09	5.32076e+09	2.7266e+09	3.07259e+09	4.79932e+09	4.38913e+09	4.47079e+09	24.53	2.28838e+09	2.60865e+09	40.78	1.92	0.94	0.004662	2.33	0.0475536	1.67646	200.047	399.5	6.7	Up
M200T400_3	327187	1.39659e+06	3.8703e+06	244254	897549	655728	1.02129e+06	953769	1.07723e+06	1.68415e+06	1.55883e+06	7.05362e+06	1.00289e+06	2.37226e+06	2.14935e+06	1.75732e+06	2.33196e+06	1.72074e+06	84.25	1.17083e+06	925659	98.54	1.99	0.99	0.0206682	1.68	0.117429	1.26968	200.214	399.6	6.7	Up
M200T770	1.17258e+06	434511	560181	673579	256523	497275	755071	1.06338e+06	1.91331e+06	2.39676e+06	1.36095e+06	1.33447e+06	2.00204e+06	965209	1.2595e+06	1.40308e+06	1.57942e+06	1.38202e+06	30.05	676637	616880	46.15	2.33	1.22	0.000621601	3.21	0.0140919	1.90957	200.172	770.5	12.8	Up
M201T113	3.58039e+06	4.16005e+06	4.12369e+06	5.61897e+06	1.77541e+06	2.97497e+06	3.11338e+06	2.42751e+06	2.0864e+06	298641	3.09157e+06	2.82622e+06	608254	2.17959e+06	2.35224e+06	2.10405e+06	1.94337e+06	2.14182e+06	50.92	3.4718e+06	3.34689e+06	34.19	0.56	-0.84	0.014763	1.83	0.0952789	1.34352	201.052	112.7	1.9	Down
M201T573_2	2.69722e+07	2.16344e+07	1.96652e+07	2.29521e+07	1.36549e+07	7.72469e+06	1.56609e+07	2.89526e+07	6.62395e+07	5.81606e+07	4.03925e+07	3.36319e+07	5.1709e+07	2.19632e+07	2.63386e+07	5.59125e+07	4.42935e+07	4.60507e+07	36.34	1.96521e+07	2.06498e+07	35.93	2.25	1.17	0.0029526	2.53	0.0361958	1.78916	200.856	573.1	9.6	Up
M201T577	1.17161e+06	670523	1.08681e+06	650584	1.29045e+06	1.63258e+06	3.61269e+06	1.19326e+06	658295	408478	516867	701004	432212	861881	321966	1.47258e+06	671661	587581	54.89	1.41357e+06	1.18244e+06	66.83	0.48	-1.07	0.0281274	1.55	0.141969	1.48036	201.147	577.2	9.6	Down
M201T726	1.34389e+06	2.10271e+06	1.19898e+06	1.69356e+06	2.86003e+06	1.23831e+06	1.69391e+06	1.81163e+06	1.27499e+06	1.31955e+06	763744	1.31391e+06	715715	772187	1.04011e+06	726608	990850	906148	28.04	1.74288e+06	1.69373e+06	31.4	0.57	-0.81	0.004662	2.33	0.0475536	1.79612	201.172	725.5	12.1	Down
M202T104	776821	1.92355e+06	1.22694e+06	1.58533e+06	461593	862713	1.09318e+06	1.15749e+06	2.26217e+06	789715	1.98222e+06	1.50458e+06	1.67048e+06	1.80571e+06	1.27085e+06	2.41258e+06	1.71229e+06	1.73809e+06	30.94	1.13595e+06	1.12533e+06	40.63	1.51	0.59	0.0379176	1.42	0.171246	1.19131	202.019	103.7	1.7	Up
M202T110	784661	1.45465e+06	952391	910446	813350	1.83709e+06	1.04582e+06	1.22399e+06	1.18417e+06	91386.5	198786	1.18638e+06	921961	278700	159959	195471	527102	238743	91.45	1.1278e+06	999105	32.15	0.47	-1.1	0.0498834	1.3	0.201689	1.61409	202.071	109.8	1.8	Down
M202T111	1.0448e+07	2.10063e+07	1.11107e+07	1.56662e+07	1.5979e+07	3.72714e+06	1.17103e+07	1.15029e+07	6.51029e+06	2.21872e+06	7.14141e+06	8.89427e+06	8.07541e+06	1.68711e+06	2.22418e+06	2.67693e+06	4.92854e+06	4.59361e+06	61	1.26438e+07	1.16066e+07	40	0.39	-1.36	0.0018648	2.73	0.0275628	1.70441	202.082	110.9	1.8	Down
M202T140	2.41216e+07	9.1188e+07	1.81765e+07	2.01154e+07	1.37564e+07	1.51133e+07	1.80209e+07	1.77689e+07	1.13091e+07	1.27142e+07	1.95891e+07	1.86111e+07	1.48168e+07	1.47028e+07	1.29557e+07	1.28402e+07	1.46924e+07	1.38293e+07	20.12	2.72826e+07	1.80987e+07	95.33	0.54	-0.89	0.0379176	1.42	0.171246	1.17657	202.107	140	2.3	Down
M202T160	5.1537e+06	3.69743e+06	5.14735e+06	2.18697e+07	3.16496e+06	1.85238e+06	6.33536e+06	3.12518e+06	3.94273e+07	3.54819e+07	5.92162e+07	1.88144e+07	3.03366e+07	2.4442e+07	1.10203e+07	5.82228e+07	3.46202e+07	3.29092e+07	50.2	6.29326e+06	4.42239e+06	102.54	5.5	2.46	0.000621601	3.21	0.0140919	2.05582	202.18	159.7	2.7	Up
M202T573	339437	204227	421063	274630	504116	667589	354477	588459	70208.3	37510.3	187510	392985	143727	373354	400626	40167.3	205761	165619	77.8	419250	387770	37.74	0.49	-1.03	0.0379176	1.42	0.171246	1.40639	201.524	573.2	9.6	Down
M202T694	799786	1.36763e+06	663295	567415	812556	389619	1.1727e+06	933799	862404	1.15769e+06	1.18593e+06	1.40783e+06	1.31371e+06	1.491e+06	1.41177e+06	799824	1.20377e+06	1.24982e+06	21.33	838350	806171	37.95	1.44	0.52	0.0281274	1.55	0.141969	1.37085	202.162	694.4	11.6	Up
M202T725	352693	428257	336119	418267	209228	395159	298686	324874	163754	294092	245899	231202	204117	181360	211835	248730	222624	221519	18.62	345411	344406	20.74	0.64	-0.63	0.0029526	2.53	0.0361958	1.87071	201.674	725.4	12.1	Down
M202T83_1	2.37513e+07	1.57091e+07	1.4645e+07	2.18603e+07	2.44343e+07	2.82909e+07	2.36802e+07	2.10342e+07	2.77051e+07	2.40003e+07	2.78316e+07	2.95121e+07	1.9641e+07	2.72816e+07	2.50737e+07	2.59618e+07	2.58759e+07	2.66217e+07	11.81	2.16757e+07	2.27702e+07	21.01	1.19	0.26	0.0498834	1.3	0.201689	1.24452	201.933	83.3	1.4	Up
M203T109	5.13785e+06	5.0735e+06	5.37806e+06	4.47633e+06	4.59779e+06	3.75494e+06	4.85886e+06	4.82567e+06	5.51226e+06	6.22127e+06	6.9928e+06	5.52305e+06	5.56192e+06	5.7464e+06	5.54997e+06	5.68463e+06	5.84904e+06	5.62328e+06	8.85	4.76288e+06	4.84227e+06	10.51	1.23	0.3	0.0001554	3.81	0.00610078	1.86485	203.114	109.5	1.8	Up
M203T111	590175	638275	547179	809279	451871	425626	1.54242e+06	605991	415825	124487	982935	364923	367014	369604	301148	496137	427759	368309	58.08	701352	598083	51.31	0.61	-0.71	0.014763	1.83	0.0952789	1.28193	203.086	111	1.9	Down
M203T311	1.80344e+06	797413	1.67877e+06	1.39058e+06	1.44404e+06	1.51997e+06	1.68749e+06	2.32197e+06	2.74357e+06	2.95253e+06	3.19194e+06	2.38282e+06	2.5794e+06	1.73864e+06	1.56404e+06	1.40178e+06	2.31934e+06	2.48111e+06	28.99	1.58046e+06	1.59937e+06	27.18	1.47	0.55	0.0379176	1.42	0.171246	1.42087	202.566	310.7	5.2	Up
M203T365	2.12031e+06	795481	683787	697155	726635	890298	355899	692450	1.0494e+06	1.60921e+06	1.02048e+06	909595	807248	1.52996e+06	1.30453e+06	1.21244e+06	1.18036e+06	1.13092e+06	24.34	870252	711895	60.65	1.36	0.44	0.014763	1.83	0.0952789	1.19767	203.139	365.5	6.1	Up
M203T439	463080	74654.6	102523	347249	43218.3	8038.54	475706	189710	631078	627512	522217	554324	530416	363232	110720	502645	480268	526316	35.63	213023	146116	89.12	2.25	1.17	0.004662	2.33	0.0475536	1.32877	203.183	438.7	7.3	Up
M203T707	309986	378893	172768	504993	64815.1	25258.4	383953	252820	633424	678185	729477	539747	911638	514480	137847	621613	595801	627518	37.31	261686	281403	63.43	2.28	1.19	0.004662	2.33	0.0475536	1.33283	203.091	707.2	11.8	Up
M203T97	6.79051e+06	6.25978e+06	7.98949e+06	7.54991e+06	6.61674e+06	4.80625e+06	8.79285e+06	7.80656e+06	1.23174e+07	1.15023e+07	9.62238e+06	9.70545e+06	1.15041e+07	1.00004e+07	9.31005e+06	1.15488e+07	1.06889e+07	1.07514e+07	10.72	7.07651e+06	7.17021e+06	17.43	1.51	0.59	0.0001554	3.81	0.00610078	2.05581	203.102	96.7	1.6	Up
M204T117	1.89534e+07	3.98622e+07	5.32073e+07	2.05216e+07	4.85791e+07	4.11578e+07	4.77175e+07	4.03172e+07	5.71967e+07	4.74811e+07	5.81402e+07	5.17002e+07	5.22514e+07	5.29827e+07	4.79522e+07	5.34373e+07	5.26427e+07	5.2617e+07	7.23	3.87895e+07	4.07375e+07	32.61	1.36	0.44	0.0104118	1.98	0.0771942	1.43104	204.087	116.6	1.9	Up
M204T371	2.87929e+06	1.33175e+06	2.92862e+06	1.16456e+06	3.32052e+06	2.52399e+06	3.26533e+06	2.32329e+06	958695	514893	446697	1.37658e+06	1.56588e+06	2.36663e+06	389674	1.55111e+06	1.14627e+06	1.16764e+06	60.6	2.46717e+06	2.70164e+06	33.42	0.46	-1.11	0.014763	1.83	0.0952789	1.61733	204.123	371	6.2	Down
M204T478	232146	1.14453e+06	771581	763157	590419	124850	723812	1.32442e+06	2.2493e+06	3.96839e+06	2.63512e+06	792962	1.46476e+06	1.10255e+06	2.15276e+06	2.86582e+06	2.15396e+06	2.20103e+06	47.97	709364	743485	57.34	3.04	1.6	0.0018648	2.73	0.0275628	1.72243	204.195	477.6	8	Up
M204T90	1.07444e+07	3.98729e+06	8.53779e+06	4.62817e+06	1.35911e+07	1.10443e+07	4.57197e+06	1.44579e+07	4.62162e+06	1.58288e+07	1.75816e+07	1.19749e+07	1.25139e+07	1.73939e+07	1.8198e+07	1.79634e+07	1.45095e+07	1.66114e+07	32.24	8.94537e+06	9.64112e+06	46.69	1.62	0.7	0.0206682	1.68	0.117429	1.30734	204.087	90.4	1.5	Up
M204T94	4.63432e+06	2.88655e+06	5.15504e+06	3.02006e+06	4.84046e+06	7.64423e+06	7.96118e+06	5.61302e+06	4.85854e+06	3.00304e+06	3.40436e+06	5.04501e+06	2.90964e+06	2.34762e+06	1.78596e+06	2.75594e+06	3.26376e+06	2.95634e+06	35.15	5.21936e+06	4.99775e+06	35.71	0.63	-0.68	0.0379176	1.42	0.171246	1.39496	204.153	94.1	1.6	Down
M205T116	3.07697e+06	2.82592e+06	2.0599e+06	3.31442e+06	1.2292e+06	140935	3.79042e+06	3.34205e+06	7.74869e+06	8.08405e+06	5.41104e+06	5.38092e+06	5.84949e+06	2.6771e+06	3.12473e+06	9.40746e+06	5.96044e+06	5.63027e+06	39.63	2.47248e+06	2.95145e+06	50.34	2.41	1.27	0.0104118	1.98	0.0771942	1.40238	205.09	116.4	1.9	Up
M206T112	393501	565416	582671	582231	540250	399036	692906	536447	852612	3.34116e+06	888106	504499	1.04333e+06	2.04403e+06	2.75782e+06	2.72244e+06	1.76925e+06	1.54368e+06	61.08	536557	552833	18.49	3.3	1.72	0.004662	2.33	0.0475536	1.82466	206.139	112.4	1.9	Up
M206T356	2.4568e+06	3.74875e+06	3.43561e+06	4.61901e+06	2.67827e+06	2.59662e+06	2.09027e+06	3.0059e+06	2.75789e+06	4.10629e+06	3.84248e+06	2.69804e+06	3.14094e+06	6.00586e+06	6.15302e+06	6.14984e+06	4.3568e+06	3.97439e+06	35	3.0789e+06	2.84208e+06	26.64	1.42	0.5	0.0498834	1.3	0.201689	1.20201	206.138	356.1	5.9	Up
M206T545	1.48859e+06	1.89795e+06	1.2361e+06	1.40283e+06	1.13435e+06	1.37502e+06	1.14467e+06	710095	593430	464735	1.60914e+06	689194	710778	1.2183e+06	592944	907403	848240	699986	45.46	1.2987e+06	1.30556e+06	26.24	0.65	-0.61	0.0379176	1.42	0.171246	1.481	206.081	545.3	9.1	Down
M206T689	97117.7	44232.1	64565.2	67905.8	69647.5	78606.8	73525.6	146825	243073	396541	129026	317180	140743	353079	322436	201885	262995	280127	37.87	80303.3	71586.6	38.16	3.28	1.71	0.000621601	3.21	0.0140919	2.14034	206.19	688.8	11.5	Up
M206T99	1.21713e+07	1.39484e+07	1.39008e+07	1.0354e+07	1.60103e+07	1.52026e+07	1.44471e+07	1.14805e+07	5.80495e+06	7.93453e+06	7.37749e+06	1.29248e+07	7.9362e+06	1.08603e+07	6.21378e+06	5.52647e+06	8072321	7.65601e+06	32.07	1.34394e+07	1.39246e+07	14.39	0.6	-0.74	0.0018648	2.73	0.0275628	1.9296	206.102	98.9	1.6	Down
M207T113_2	654025	796711	841906	1.04855e+06	706993	1.15629e+06	60039.3	1.47712e+06	452441	450873	450787	88697.8	340835	403665	447366	113054	343465	425516	45.02	842703	819308	49.37	0.41	-1.29	0.0104118	1.98	0.0771942	1.07731	207.155	112.8	1.9	Down
M207T114	69822.8	57505.4	145940	49757.1	241043	48072.9	145724	40709.9	579189	574107	489017	576510	426798	564024	410765	626240	530831	569065	14.85	99821.9	63664.1	71.39	5.32	2.41	0.0001554	3.81	0.00610078	2.24787	206.959	114.3	1.9	Up
M207T348	869637	1.04925e+06	1.29418e+06	1.04512e+06	1.04712e+06	948208	1.14438e+06	1.33689e+06	1.42353e+06	2.29862e+06	1.59325e+06	1.44922e+06	1.44482e+06	1.49725e+06	1.78623e+06	1.7599e+06	1.6566e+06	1.54525e+06	17.84	1.09185e+06	1.04819e+06	14.68	1.52	0.6	0.0001554	3.81	0.00610078	2.0645	207.088	347.9	5.8	Up
M207T587	65749.9	270284	201376	280164	222702	199722	176996	350827	378530	422320	285449	193620	330727	286895	367845	505116	346313	349286	27.46	220978	212039	38.12	1.57	0.65	0.014763	1.83	0.0952789	1.37461	206.662	586.7	9.8	Up
M207T99	751061	792764	723441	755175	717341	602995	936247	810700	762061	278738	713825	598195	565558	515252	299500	600471	541700	581876	32.27	761215	753118	12.42	0.71	-0.49	0.004662	2.33	0.0475536	1.51017	207.106	99.1	1.7	Down
M208T616_1	1.3007e+06	522504	276201	1.22251e+06	153805	74987.3	909419	436606	2.34558e+06	1.98383e+06	1.91921e+06	718476	1.98937e+06	1.55855e+06	566079	1.69024e+06	1.59642e+06	1.80473e+06	39.71	612092	479555	77.75	2.61	1.38	0.004662	2.33	0.0475536	1.53144	207.67	616.3	10.3	Up
M208T71	423567	431130	417926	411399	395599	350234	470119	420343	400950	536431	532007	449598	441880	451538	426912	535786	471888	450568	11.53	415040	419135	8.14	1.14	0.19	0.0281274	1.55	0.141969	1.38216	207.957	71.4	1.2	Up
M208T78	4.18168e+06	4.62787e+06	7.18938e+06	1.0316e+07	4.4017e+06	6.34889e+06	5.37944e+06	8.4785e+06	2.27095e+06	1.67662e+06	3.68663e+06	4.6625e+06	2.38932e+06	2.9954e+06	1.87933e+06	3.00787e+06	2.82108e+06	2.69236e+06	35.17	6.36543e+06	5.86416e+06	34.3	0.44	-1.17	0.0010878	2.96	0.0203124	1.97661	208.054	78.3	1.3	Down
M208T83	1.14186e+06	1.21271e+06	944920	1.05109e+06	1.41527e+06	729754	1.15804e+06	984323	997976	566382	859080	1.25359e+06	623080	602008	555957	617048	759390	620064	33.51	1.07975e+06	1.09647e+06	18.88	0.7	-0.51	0.0281274	1.55	0.141969	1.564	207.972	82.5	1.4	Down
M209T130	1.9097e+06	1.61638e+06	2.70335e+06	2.14277e+06	2.70771e+06	2.69816e+06	1.9247e+06	2.16205e+06	999405	918229	1.54851e+06	1.53426e+06	1.07455e+06	2.6154e+06	2.01013e+06	1.23167e+06	1.49152e+06	1.38297e+06	38.84	2.2331e+06	2.15241e+06	18.97	0.67	-0.58	0.0104118	1.98	0.0771942	1.54879	209.092	129.7	2.2	Down
M209T334	5.46583e+06	5.69825e+06	6.19018e+06	2.31342e+06	4.3994e+06	4.98762e+06	2.42735e+07	6.13525e+06	2.53642e+06	4.95759e+06	1.12343e+07	4.15474e+06	2.91012e+06	961158	1.58027e+06	3.16736e+06	3.93774e+06	3.03874e+06	81.65	7.43293e+06	5.58204e+06	93.09	0.53	-0.92	0.0498834	1.3	0.201689	1.09331	209.092	333.6	5.6	Down
M209T642	263396	105919	390775	288151	696518	258306	297784	453984	432552	374492	858282	438444	560641	516646	366037	678459	528194	477545	31.99	344354	292968	50.81	1.53	0.62	0.0498834	1.3	0.201689	1.37957	208.678	642.3	10.7	Up
M209T693	467448	555185	1.89981e+06	611143	3.8483e+06	8.60197e+06	1.079e+06	774629	249741	210250	330777	371885	241260	1.18799e+06	632015	99503.8	415427	290259	84.01	2.22969e+06	926814	126.06	0.19	-2.42	0.0104118	1.98	0.0771942	1.55122	209.117	692.9	11.5	Down
M209T810	2.61429e+06	1.83976e+06	2.94691e+06	4.63221e+06	700700	975391	3.82695e+06	4.08664e+06	6.15195e+06	4.62911e+06	5.29452e+06	5.5585e+06	6.92351e+06	4.21482e+06	4.38793e+06	6.4442e+06	5.45057e+06	5.42651e+06	18.37	2.70285e+06	2.7806e+06	53.63	2.02	1.01	0.0010878	2.96	0.0203124	1.65246	209.19	810.4	13.5	Up
M210T107	637611	817505	653117	685570	569992	737422	617581	467636	663234	170906	477545	684213	417890	393778	292053	585581	460650	447717	38.97	648304	645364	16.26	0.71	-0.49	0.0498834	1.3	0.201689	1.38208	210.098	107.1	1.8	Down
M210T137	2.91179e+06	3.67993e+06	2.19927e+06	3.74556e+06	2.40762e+06	2.42265e+06	2.07043e+06	2.04151e+06	2.58792e+06	785581	2.30258e+06	2.66946e+06	1.71733e+06	1.66453e+06	1.66894e+06	1.00962e+06	1.80074e+06	1.69313e+06	38.28	2.68485e+06	2.41514e+06	25.73	0.67	-0.58	0.0498834	1.3	0.201689	1.43536	210.008	136.7	2.3	Down
M210T309	3.96749e+06	3.8599e+06	3.50838e+06	3.74065e+06	2.57007e+06	2.17971e+06	4.57288e+06	4.48672e+06	5.80389e+06	5.01988e+06	5.30447e+06	4.44761e+06	4.89409e+06	3.89576e+06	4.39604e+06	5.14045e+06	4.86277e+06	4.95698e+06	12.31	3.61072e+06	3.80028e+06	23.5	1.35	0.43	0.00699301	2.16	0.0602244	1.57119	209.985	308.8	5.1	Up
M210T485	395938	657516	637203	711561	557264	338004	668779	388028	421586	800535	742620	939009	705271	743535	686453	851464	736309	743077	20.6	544287	597233	27.26	1.35	0.44	0.00699301	2.16	0.0602244	1.28876	210.111	484.9	8.1	Up
M210T720	638753	908307	615213	1.36236e+06	622728	869030	540012	739143	1.2804e+06	980719	1.3575e+06	1.84494e+06	1.27021e+06	1.16449e+06	1.84258e+06	1.00938e+06	1.34378e+06	1.27531e+06	24.93	786943	688948	33.77	1.71	0.77	0.004662	2.33	0.0475536	1.81484	210.112	720.3	12	Up
M211T108	367482	613585	304233	406886	492622	386686	459900	243231	284019	109670	342633	408505	213275	105761	136056	165682	220700	189479	51.36	409328	396786	28.03	0.54	-0.89	0.0104118	1.98	0.0771942	1.69169	211.071	107.9	1.8	Down
M211T319	827364	785498	1.11702e+06	446104	1.43859e+06	1.45022e+06	1.25844e+06	723315	517889	311637	688120	583303	726574	942289	861490	296101	615926	635712	38.31	1.00582e+06	972194	36.33	0.61	-0.71	0.0498834	1.3	0.201689	1.30042	211.107	318.6	5.3	Down
M211T360	399105	288097	95148.5	286857	260789	269463	360977	252669	113014	44936.2	117130	163754	124093	104905	34699.7	107028	101195	110021	41.7	276638	278160	32.38	0.37	-1.45	0.004662	2.33	0.0475536	1.89431	211.174	359.9	6	Down
M211T755	1.80412e+06	921708	3.25652e+06	2.84714e+06	1.25392e+06	2.4627e+06	3.89386e+06	1.83168e+06	3.64086e+06	2.51226e+06	3.28968e+06	4.47054e+06	4.28346e+06	4.96776e+06	1.61091e+06	5.9526e+06	3.84101e+06	3.96216e+06	36.03	2.28396e+06	2.14719e+06	44.52	1.68	0.75	0.0281274	1.55	0.141969	1.32902	211.144	754.7	12.6	Up
M212T136	7.65249e+06	4.35124e+06	9.70874e+06	4.18845e+06	9.24134e+06	1.03008e+07	7.09222e+06	7.38107e+06	1.42285e+07	4.05446e+07	1.48231e+07	1.50035e+07	1.42955e+07	2.94773e+07	3.1095e+07	3.66393e+07	2.45133e+07	2.22404e+07	45.39	7.48954e+06	7.51678e+06	30.63	3.27	1.71	0.0001554	3.81	0.00610078	2.0948	212.003	136.5	2.3	Up
M212T354	1.03288e+06	1.32769e+06	1.97103e+06	1.6754e+06	1.32625e+06	1.46011e+06	1.60028e+06	1.49718e+06	1.48622e+06	4.36886e+06	2.53787e+06	2.64515e+06	2.07995e+06	4.19418e+06	4.09551e+06	4.26927e+06	3.20963e+06	3.37033e+06	35.79	1.48635e+06	1.47864e+06	18.7	2.16	1.11	0.0018648	2.73	0.0275628	1.93257	212.149	353.5	5.9	Up
M212T465	934084	311046	394547	823191	772476	288190	640682	643895	257968	228246	426683	185042	309277	424055	233150	569791	329277	283623	40.1	601014	642289	40.64	0.55	-0.87	0.0206682	1.68	0.117429	1.45678	212.092	465.4	7.8	Down
M212T533	1.21408e+06	1.50431e+06	2.67348e+06	1.17925e+06	4.54623e+06	6.65004e+06	1.91729e+06	1.72664e+06	456367	273386	892204	783631	611298	1.46131e+06	1.22571e+06	227864	741470	697465	59.41	2.67642e+06	1.82197e+06	72.72	0.28	-1.85	0.0018648	2.73	0.0275628	1.76747	212.091	532.8	8.9	Down
M212T643	1.01197e+07	2.02918e+06	5.14564e+06	2.58572e+06	1.39239e+06	2.19117e+06	3.00954e+06	6.35518e+06	1.33933e+07	1.37717e+07	6.64501e+06	1.1296e+07	1.45016e+07	8.14783e+06	2.95024e+06	1.86206e+07	1.11658e+07	1.23446e+07	44.85	4.10357e+06	2.79763e+06	72.03	2.72	1.44	0.004662	2.33	0.0475536	1.67364	212.165	642.5	10.7	Up
M212T91_1	4.85364e+06	1.20268e+07	2.98118e+06	6.12333e+06	2.86804e+06	3.26686e+06	5.64943e+06	3.12587e+06	99433.6	45583.5	183771	110169	162943	1.00489e+06	96262.4	115811	227358	112990	139.42	5.1119e+06	4.06025e+06	60.12	0.04	-4.49	0.0001554	3.81	0.00610078	2.33539	212.043	90.7	1.5	Down
M213T137	341212	243066	354249	314947	459129	191311	452720	271910	1.03277e+06	660397	1.483e+06	647203	702369	314425	395758	759549	749434	681383	49.24	328568	328080	28.83	2.28	1.19	0.00699301	2.16	0.0602244	1.76364	213.007	137	2.3	Up
M213T457	125313	164096	185189	179206	210877	173965	315063	110046	328422	962000	403470	324358	458255	430170	672285	367282	493280	416820	44.45	182969	176585	34.15	2.7	1.43	0.0001554	3.81	0.00610078	2.06669	213.023	457.3	7.6	Up
M213T643	368269	445302	514842	494628	533497	367077	577902	460520	1.50251e+06	1.02321e+06	699801	526368	1.15441e+06	492998	668307	1.11349e+06	897636	861505	39.67	470255	477574	16.06	1.91	0.93	0.004662	2.33	0.0475536	1.76521	213.168	642.5	10.7	Up
M214T384	1.44798e+06	1.08162e+06	1.7327e+06	869919	1.34968e+06	869929	1.33242e+06	1.43948e+06	708507	701492	884790	923106	987801	769016	958062	779002	838972	831896	13.51	1.26546e+06	1.34105e+06	23.9	0.66	-0.59	0.0104118	1.98	0.0771942	1.76159	214.107	384.4	6.4	Down
M214T573	3.76799e+06	4.91807e+06	5.18727e+06	2.51263e+06	5.52955e+06	7.12238e+06	3.98216e+06	3.86928e+06	469393	250337	1.67327e+06	2.19111e+06	1.36374e+06	3.71142e+06	4.37075e+06	268082	1.78726e+06	1.5185e+06	87.55	4.61117e+06	4.45011e+06	30.27	0.39	-1.37	0.0029526	2.53	0.0361958	1.62495	214.196	573.2	9.6	Down
M214T62	3.86742e+06	3.52086e+06	3.6424e+06	3.16413e+06	3.99729e+06	3.5652e+06	4.15308e+06	3.22043e+06	4.0012e+06	4.77957e+06	4.57288e+06	5.14083e+06	4.81539e+06	4.68161e+06	3.79345e+06	4.06278e+06	4.48096e+06	4.62725e+06	10.54	3.64135e+06	3.6038e+06	9.65	1.23	0.3	0.0029526	2.53	0.0361958	1.82365	214.001	61.6	1	Up
M215T114_1	5.44256e+06	5.3938e+06	5.02591e+06	6.74834e+06	5.49917e+06	4.90489e+06	6.16501e+06	6.75669e+06	9.2883e+06	1.04754e+07	9.5283e+06	1.00875e+07	1.14542e+07	1.01504e+07	8.32242e+06	1.24928e+07	1.02249e+07	1.01189e+07	12.66	5.74205e+06	5.47087e+06	12.67	1.78	0.83	0.0001554	3.81	0.00610078	2.30553	214.966	114.5	1.9	Up
M215T573	1.69051e+06	983695	747972	1.42597e+06	810128	205402	2.08789e+06	1.03016e+06	2.00038e+06	1.96737e+06	2.05826e+06	2.05477e+06	2.27124e+06	1.24017e+06	1.09808e+06	1.81579e+06	1.81326e+06	1.98388e+06	23.09	1.12272e+06	1.00693e+06	52.73	1.62	0.69	0.0281274	1.55	0.141969	1.28835	214.53	573.1	9.6	Up
M215T82	6.6425e+06	8.3111e+06	6.54986e+06	8.009e+06	1.02577e+07	9.11459e+06	1.74728e+07	1.45629e+07	3.03437e+06	5.0463e+06	3.4932e+06	3.8059e+06	3.441e+06	2.36137e+06	2.71284e+06	3.11255e+06	3.37594e+06	3.27678e+06	24.14	1.01151e+07	8.71285e+06	38.72	0.33	-1.58	0.0001554	3.81	0.00610078	2.18563	214.85	82.1	1.4	Down
M216T108	3.12363e+07	5.11629e+07	5.37176e+07	3.09682e+07	3.04255e+07	3.41474e+07	5.2998e+07	4.53067e+07	1.60465e+07	9.14133e+06	8.72685e+06	4.27721e+07	2.77561e+07	2.43033e+07	9.97867e+06	1.07011e+07	1.86783e+07	1.33738e+07	64.97	4.12453e+07	3.97271e+07	25.62	0.45	-1.14	0.0018648	2.73	0.0275628	1.85032	216.098	107.6	1.8	Down
M216T368	6.55473e+06	2.9298e+07	2.21956e+06	4.4241e+06	3.0297e+06	2.68809e+06	3.4108e+06	2.54956e+06	1.77289e+06	781947	2.19657e+06	2.35571e+06	794471	847386	167368	1.17792e+06	1.26178e+06	1.01265e+06	61.07	6.77182e+06	3.22025e+06	135.98	0.19	-2.42	0.0003108	3.51	0.00894927	1.75704	216.087	368.1	6.1	Down
M216T593	3.08532e+06	1.27303e+06	2.07636e+06	1.66931e+06	4.74093e+06	1.44145e+06	2.79242e+06	1.79414e+06	4.17437e+06	2.84883e+06	5.01258e+06	3.78882e+06	5.19639e+06	3.99917e+06	3.83945e+06	4.10781e+06	4.12093e+06	4.05349e+06	17.83	2.35912e+06	1.93525e+06	48.82	1.75	0.8	0.00699301	2.16	0.0602244	1.79554	216.159	592.6	9.9	Up
M216T608	347038	136332	171938	120646	187539	45442.4	175364	169595	213716	330392	198668	334522	211358	285112	292019	199564	258169	249414	22.71	169237	170766	50.32	1.53	0.61	0.0104118	1.98	0.0771942	1.35395	216.069	608.4	10.1	Up
M216T626	822954	832976	973902	638175	1.13741e+06	1.58309e+06	909567	1.03921e+06	358598	394727	556580	721514	208434	1.16242e+06	886952	87173.6	547050	475653	65.89	992161	941735	28.48	0.55	-0.86	0.0281274	1.55	0.141969	1.39489	215.587	626.3	10.4	Down
M217T114	516056	547504	452189	634380	446030	401701	576325	455421	553793	938518	1.17237e+06	567088	723156	585335	579690	703529	727934	644432	30.32	503701	485738	15.58	1.45	0.53	0.004662	2.33	0.0475536	1.58535	216.963	114.4	1.9	Up
M217T440	561398	382513	542923	707510	308202	114915	555278	439068	1.06725e+06	931025	883110	896380	851685	613804	590149	1.05655e+06	861245	889745	20.68	451476	490996	40.63	1.91	0.93	0.000621601	3.21	0.0140919	1.64603	217.097	440.2	7.3	Up
M217T699	345478	245527	598537	43172	650364	380630	594593	300692	64752	75100	32275	151665	135875	104804	98901.1	216550	109990	101853	52.36	394874	363054	52.79	0.28	-1.84	0.00699301	2.16	0.0602244	1.59634	217.163	698.8	11.6	Down
M217T86	2.73498e+06	2.63291e+06	2.76734e+06	2.5833e+06	2.54744e+06	2.36096e+06	2.83837e+06	2.49607e+06	3.74356e+06	5.14181e+06	3.45794e+06	3.08172e+06	3.25327e+06	3.7943e+06	4.21967e+06	4.52169e+06	3.90175e+06	3.76893e+06	17.73	2.62017e+06	2.6081e+06	5.98	1.49	0.57	0.0001554	3.81	0.00610078	2.10809	217.065	85.9	1.4	Up
M218T109	471677	380900	347280	417869	530453	343213	481006	454739	730766	751947	498894	551728	461183	452664	655088	549063	581417	550395	20.2	428392	436304	15.77	1.36	0.44	0.0104118	1.98	0.0771942	1.67156	218.067	109	1.8	Up
M218T575	9.18236e+06	1.48772e+07	2.68745e+07	1.18027e+07	3.56923e+07	1.99197e+07	2.01057e+07	1.04952e+07	1.17312e+07	4.55108e+07	5.675e+07	4.41089e+07	4.21874e+07	2.42167e+07	1.40013e+07	6.48517e+07	3.79197e+07	4.31482e+07	51.21	1.86187e+07	1.73985e+07	48.85	2.04	1.03	0.0498834	1.3	0.201689	1.32442	218.211	575.5	9.6	Up
M218T83	958840	1.07839e+06	875393	440704	1.26737e+06	855993	1.80988e+06	885553	2.17403e+06	2.40506e+06	3.25783e+06	2.10311e+06	1.58114e+06	1.21677e+06	1.60942e+06	1.18422e+06	1.94145e+06	1.85626e+06	35.72	1.02152e+06	922197	38.7	1.9	0.93	0.004662	2.33	0.0475536	1.71629	217.938	82.8	1.4	Up
M219T102	729364	989151	1.00427e+06	876657	972583	987010	893006	1.03032e+06	873155	819327	250255	840944	815028	702400	717763	848717	733449	817177	27.9	935295	979796	10.57	0.78	-0.35	0.0029526	2.53	0.0361958	1.16653	219.061	101.7	1.7	Down
M219T113	1.21073e+06	1.3198e+06	939472	1.45201e+06	751082	1.02148e+06	662507	761170	1.32553e+06	4.1157e+06	5.60138e+06	2.29535e+06	2.74964e+06	3.55451e+06	3.08017e+06	4.29429e+06	3.37707e+06	3.31734e+06	39.13	1.01478e+06	980477	28.52	3.33	1.73	0.0003108	3.51	0.00894927	2.12532	219.134	112.7	1.9	Up
M219T139	285189	508251	276604	582538	1.1898e+06	1.03338e+06	62257.8	563137	703536	911198	829384	877927	824905	1.45394e+06	2.46035e+06	1.53691e+06	1.19977e+06	894563	49.59	562644	535694	68.09	2.13	1.09	0.0206682	1.68	0.117429	1.46436	219.097	139.3	2.3	Up
M219T277	903153	1.01635e+06	5.48188e+06	1.44748e+06	898816	388566	7.79246e+06	6.55026e+06	7.55391e+06	9.86668e+06	9.25405e+06	1.10303e+07	9.78142e+06	8.98839e+06	6.71285e+06	6.37515e+06	8.69534e+06	9.12122e+06	18.96	3.05987e+06	1.23192e+06	98.57	2.84	1.51	0.0018648	2.73	0.0275628	1.79691	219.142	277.1	4.6	Up
M219T767	1.03938e+06	1.48856e+06	1.32018e+06	245171	272668	1.39745e+06	1.09542e+06	377014	685422	345369	153354	359004	614636	340775	131854	240643	358882	343072	55.76	904480	1.0674e+06	57.96	0.4	-1.33	0.0379176	1.42	0.171246	1.43008	219.095	767.4	12.8	Down
M219T82	9.06397e+06	1.30797e+07	1.11089e+07	1.08538e+07	1.49681e+07	1.46502e+07	2.73097e+07	1.88109e+07	3.21607e+06	5.90317e+06	6.0193e+06	4.44166e+06	5.627e+06	5.05982e+06	3.73935e+06	4.0715e+06	4.75973e+06	4.75074e+06	22.09	1.49807e+07	1.3865e+07	38.88	0.32	-1.65	0.0001554	3.81	0.00610078	2.20926	219.083	82.1	1.4	Down
M219T88	1.90749e+06	1.90618e+06	2.6383e+06	1.89607e+06	2.62921e+06	2.57006e+06	2.37682e+06	2.20634e+06	1.65069e+06	1.45179e+06	2.0843e+06	2.0931e+06	1.72391e+06	2.12403e+06	1.74356e+06	1.37149e+06	1.78036e+06	1.73374e+06	16.51	2.26631e+06	2.29158e+06	14.67	0.79	-0.35	0.014763	1.83	0.0952789	1.54466	219.005	88.5	1.5	Down
M220T102	1.98568e+07	1.41354e+07	2.12711e+07	1.212e+07	1.59134e+07	1.49728e+07	2.24484e+07	2.01533e+07	2.32395e+07	3.52576e+07	2.81591e+07	2.58668e+07	2.49776e+07	1.81408e+07	1.87798e+07	2.55815e+07	2.50004e+07	2.52795e+07	21.65	1.76089e+07	1.78851e+07	21.5	1.42	0.51	0.0104118	1.98	0.0771942	1.64644	220.118	102	1.7	Up
M220T112	88350	60672.5	156866	81720.6	150302	935545	134275	84379.9	149792	4.81123e+06	207165	254970	224367	4.03143e+06	5.69101e+06	3.00779e+06	2.29722e+06	1.63138e+06	102.48	211514	111313	139.32	10.86	3.44	0.004662	2.33	0.0475536	1.56812	220.129	112.4	1.9	Up
M220T533	163368	1.38237e+06	142288	348759	231446	745878	80309.9	185605	2.18199e+06	1.87099e+06	1.80863e+06	1.53874e+06	1.25765e+06	4.07997e+06	3.2517e+06	3.31366e+06	2.41292e+06	2.02649e+06	41.75	410003	208526	108.51	5.89	2.56	0.0003108	3.51	0.00894927	2.07604	220.097	533.1	8.9	Up
M220T691	849120	1.26945e+06	1.91648e+06	1.04725e+06	1.37095e+06	1.50199e+06	1.41519e+06	1.15234e+06	530041	333935	704551	674175	566684	1.37386e+06	750306	120447	631750	620429	57.9	1.31535e+06	1.3202e+06	24.5	0.48	-1.06	0.0029526	2.53	0.0361958	1.6412	220.177	691.1	11.5	Down
M221T102	2.02153e+06	2.07096e+06	1.41173e+06	3.74146e+06	2.82232e+06	2.00384e+06	1.95971e+06	289426	239994	252382	2.49362e+06	124083	129733	1.93615e+06	218453	290557	710621	246188	132.57	2.04012e+06	2.01269e+06	48.93	0.35	-1.52	0.014763	1.83	0.0952789	1.61761	221.114	102.2	1.7	Down
M221T114	1.1292e+06	772331	612441	1.07461e+06	331672	230366	708199	1.01885e+06	2.03011e+06	2.49286e+06	1.49245e+06	1.30121e+06	1.83827e+06	994434	1.04487e+06	2.62976e+06	1.728e+06	1.66536e+06	36.23	734708	740265	45.6	2.35	1.23	0.0029526	2.53	0.0361958	1.74649	221.013	114.3	1.9	Up
M221T246	1.40831e+06	1.51351e+06	1.45392e+06	1.61526e+06	1.41475e+06	1.08632e+06	1.55694e+06	1.32593e+06	1.73766e+06	1.64152e+06	1.79034e+06	1.48863e+06	1.65621e+06	1.68531e+06	1.57292e+06	1.60447e+06	1.64713e+06	1.64886e+06	5.75	1.42187e+06	1.43434e+06	11.5	1.16	0.21	0.0029526	2.53	0.0361958	1.57465	221.092	245.6	4.1	Up
M221T347	2.14852e+07	7.24268e+07	5.40863e+06	1.25992e+07	1.37297e+07	1.22039e+07	1.58343e+07	1.36712e+07	2.07551e+06	310409	4.46227e+06	6.31692e+06	729927	2.11398e+06	1.06824e+06	4.43093e+06	2.68852e+06	2.09474e+06	79.74	2.09199e+07	1.37005e+07	101.71	0.13	-2.96	0.0003108	3.51	0.00894927	1.99324	221.092	347.4	5.8	Down
M221T356	1.47332e+08	1.63338e+08	1.44699e+08	1.59411e+08	1.58148e+08	1.57753e+08	1.68401e+08	1.72549e+08	1.75483e+08	2.23702e+08	2.08208e+08	2.01064e+08	1.46105e+08	2.02659e+08	1.79109e+08	2.25109e+08	1.9518e+08	2.01861e+08	13.73	1.58954e+08	1.58779e+08	5.99	1.23	0.3	0.00699301	2.16	0.0602244	1.7243	221.121	356.4	5.9	Up
M221T378	112854	689777	594515	164800	1.18114e+06	859001	923264	1.34576e+06	1.152e+06	1.07905e+06	1.28086e+06	1.46515e+06	1.49545e+06	635150	1.87726e+06	960850	1.24322e+06	1.21643e+06	30.42	733890	774389	59.99	1.69	0.76	0.0379176	1.42	0.171246	1.3083	221.09	377.6	6.3	Up
M221T394	1.215e+06	386504	690909	502068	748238	820001	580966	628773	1.63718e+06	1.35642e+06	1.86989e+06	1.46648e+06	996145	1.27634e+06	1.23793e+06	2.02173e+06	1.48276e+06	1.41145e+06	23.08	696557	659841	35.94	2.13	1.09	0.0003108	3.51	0.00894927	2.06277	221.103	394.1	6.6	Up
M221T708	458579	824526	710563	568986	1.86806e+06	2.18076e+06	991411	509053	48947.8	10784.2	139396	201214	72396.3	789682	933308	18445	276772	105896	133.09	1.01399e+06	767544	64.35	0.27	-1.87	0.014763	1.83	0.0952789	1.67724	221.074	707.9	11.8	Down
M222T110	1.2289e+07	9.77346e+06	9.65555e+06	1.26178e+07	7.12971e+06	7.96461e+06	1.15333e+07	1.34288e+07	1.74764e+07	2.03779e+07	1.61105e+07	1.46653e+07	1.963e+07	1.43217e+07	1.65423e+07	2.00243e+07	1.73936e+07	1.70094e+07	13.76	1.0549e+07	1.06534e+07	21.6	1.65	0.72	0.0001554	3.81	0.00610078	2.04555	222.043	109.6	1.8	Up
M222T122	1.17316e+07	1.34442e+07	1.19785e+07	1.8044e+07	1.21028e+07	1.35203e+07	1.7385e+07	9.56288e+06	2.4774e+07	1.93459e+07	1.94451e+07	2.43117e+07	2.01832e+07	2.13133e+07	1.69272e+07	2.09974e+07	2.09122e+07	2.05903e+07	12.48	1.34712e+07	1.27735e+07	21.48	1.55	0.63	0.000621601	3.21	0.0140919	1.97484	222.043	122.1	2	Up
M222T315	6181.03	5782.11	13089.7	67347.7	102034	18586	5376.44	5048.38	267835	590420	367958	17645.3	201453	166965	245354	257898	264441	251626	62.59	27930.7	9635.37	130.84	9.47	3.24	0.0010878	2.96	0.0203124	1.96377	222.043	314.5	5.2	Up
M222T335	7.47948e+06	7.84118e+06	6.5591e+06	7.40096e+06	6.85754e+06	5.05954e+06	5.91376e+06	5.54605e+06	8.26194e+06	5.71247e+07	1.11084e+07	2.84821e+07	6.74265e+06	4.13495e+07	5.57351e+07	4.91088e+07	3.22391e+07	3.49158e+07	66.57	6.5822e+06	6.70832e+06	15.17	4.9	2.29	0.0018648	2.73	0.0275628	1.82844	222.112	334.6	5.6	Up
M222T347	13200.9	118716	225349	38697.8	147230	97466	206489	866571	1.06875e+06	2.3157e+06	1.29192e+06	161005	340690	1.68611e+06	1.31746e+06	1.6775e+06	1.23239e+06	1.30469e+06	57.85	214215	132973	127.75	5.75	2.52	0.0018648	2.73	0.0275628	1.82186	222.095	347.4	5.8	Up
M222T356	4.44091e+07	1.01699e+08	1.31914e+07	8.19379e+07	1.77742e+07	4.14555e+07	4.74028e+07	3.01905e+07	1.0875e+07	1.79349e+07	3.17258e+07	1.13897e+07	1.03923e+07	2.25858e+07	3.28124e+07	1.40261e+07	1.89677e+07	1.59805e+07	48.38	4.72575e+07	4.29323e+07	64.63	0.4	-1.32	0.0281274	1.55	0.141969	1.50031	222.123	356.4	5.9	Down
M222T593	1.67845e+06	930002	968101	1.46093e+06	1.23318e+06	1.08141e+06	2.95636e+06	859869	3.43892e+06	2.58077e+06	4.32133e+06	2.3013e+06	2.87866e+06	2.14862e+06	2.16968e+06	3.57503e+06	2.92679e+06	2.72971e+06	26.84	1.39604e+06	1.15729e+06	49.42	2.1	1.07	0.0029526	2.53	0.0361958	1.92659	222.178	592.6	9.9	Up
M222T674	412592	630387	817483	239337	565147	1.18642e+06	464686	589307	400577	539904	111249	432475	464439	206257	71267.4	195500	302709	303417	58.55	613170	577227	46.76	0.49	-1.02	0.0104118	1.98	0.0771942	1.44141	222.076	673.9	11.2	Down
M222T677	625694	928017	880138	285740	455586	1.20333e+06	1.56106e+06	552861	838248	306590	110684	763160	623690	221708	69685.6	244701	397308	275646	75.59	811553	752916	51.82	0.49	-1.03	0.0379176	1.42	0.171246	1.38984	221.685	677	11.3	Down
M222T83	3.40151e+07	5.12361e+07	3.59684e+07	4.98182e+07	3.61992e+07	3.65354e+07	4.28032e+07	4.31059e+07	3.53175e+07	2.78652e+07	4.7774e+07	2.96539e+07	2.13701e+07	4.04237e+07	2.98802e+07	3.36979e+07	3.32478e+07	3.17891e+07	24.42	4.12102e+07	3.96693e+07	16.07	0.81	-0.31	0.0281274	1.55	0.141969	1.29519	222.029	83.4	1.4	Down
M223T104_1	1.19739e+06	1.08478e+06	894180	1.16481e+06	1.02184e+06	910482	862973	824048	931421	164092	844297	1.08255e+06	852146	537855	297629	406023	639502	691076	52.08	995063	966163	14.34	0.64	-0.64	0.0281274	1.55	0.141969	1.40774	222.998	103.6	1.7	Down
M223T104_2	1.38951e+06	1.16351e+06	1.28427e+06	824740	1.37283e+06	791751	2.37935e+06	1.35758e+06	966333	845124	961652	1.01282e+06	992204	793314	651602	1.10325e+06	915787	963993	15.71	1.32044e+06	1.32092e+06	37.12	0.69	-0.53	0.0498834	1.3	0.201689	1.33998	223.075	104.1	1.7	Down
M223T113	459270	458554	731816	548269	366437	78209	726158	547838	919200	3.09921e+06	944718	111285	977264	1.99956e+06	1.9354e+06	2.0485e+06	1.50439e+06	1.45633e+06	62.28	489569	503554	42.83	3.07	1.62	0.00699301	2.16	0.0602244	1.26598	223.116	113	1.9	Up
M223T356	2.27927e+06	1.39708e+06	1.54473e+06	1.59537e+06	1.73473e+06	1.95311e+06	1.68824e+06	1.6786e+06	1.31085e+06	1.32744e+06	1.2522e+06	1.28943e+06	1.27973e+06	1.98051e+06	1.44962e+06	1.541e+06	1.42885e+06	1.31915e+06	17.03	1.73389e+06	1.68342e+06	15.7	0.82	-0.28	0.014763	1.83	0.0952789	1.39034	223.125	356.4	5.9	Down
M223T395	190045	19330.7	20705.4	187449	166703	159045	38720	172246	41729.1	3.69791e+06	486315	22276.6	229279	4.9223e+06	3.33827e+06	2.63128e+06	1.92117e+06	1.5588e+06	101.73	119280	162874	65.31	16.11	4.01	0.0281274	1.55	0.141969	1.36647	223.107	395.3	6.6	Up
M223T439	2.76482e+06	1.77779e+06	3.78799e+06	871741	6.80549e+06	2.18724e+06	1.82038e+06	1.38542e+06	2.92504e+07	1.21251e+07	1.46783e+07	1.16781e+07	1.85252e+07	1.9398e+07	7.60175e+06	6.99535e+06	1.50315e+07	1.34017e+07	48.57	2.67511e+06	2.00381e+06	70.64	5.62	2.49	0.0001554	3.81	0.00610078	2.16237	223.154	439.2	7.3	Up
M223T719	1.36542e+06	3.33706e+06	2.17727e+06	2.92087e+06	2.764e+06	2.619e+06	2.14951e+06	3.84861e+06	5.1371e+06	2.80091e+06	5.56694e+06	2.97051e+06	3.3397e+06	3.27152e+06	2.90615e+06	4.43421e+06	3.80338e+06	3.30561e+06	28.61	2.64772e+06	2.6915e+06	28.98	1.44	0.52	0.0281274	1.55	0.141969	1.39316	223.133	719	12	Up
M224T329	142321	186715	363640	229164	389246	622148	613288	828787	1.20344e+06	998158	905874	1.004e+06	1.26138e+06	749380	543978	983300	956189	990729	24.18	421913	376443	57.87	2.27	1.18	0.0018648	2.73	0.0275628	1.84009	224.078	329.1	5.5	Up
M224T356	1.16135e+06	1.09986e+06	1.46566e+06	1.3237e+06	633791	732290	626941	786676	1.52188e+06	2.86621e+06	2.68482e+06	675872	1.11953e+06	2.96906e+06	935906	1.93515e+06	1.83855e+06	1.72852e+06	49.69	978782	943268	33.32	1.88	0.91	0.0498834	1.3	0.201689	1.32687	224.078	356.1	5.9	Up
M224T363	1.62141e+06	824151	636186	1.26478e+06	1.60242e+06	980649	818586	946328	551547	227351	839790	373331	760864	618138	250351	305439	490851	462439	48.09	1.08681e+06	963489	34.05	0.45	-1.15	0.0018648	2.73	0.0275628	1.80256	224.111	363.3	6.1	Down
M224T415	501768	523845	368591	448734	467106	324549	418409	237476	636058	539744	419667	412277	1.13911e+06	778209	878241	777564	697609	706811	35.44	411310	433572	23.42	1.7	0.76	0.014763	1.83	0.0952789	1.57835	224.185	414.9	6.9	Up
M224T576	7.47026e+06	1.34974e+07	1.43652e+07	3.75673e+06	1.73354e+07	1.51531e+07	8.36109e+06	1.03815e+07	1.89877e+06	1.2463e+06	1.16664e+07	5.94443e+06	6.06786e+06	1.03808e+07	3.20471e+06	896012	5.16316e+06	4.57457e+06	79.85	1.12901e+07	1.19394e+07	40.53	0.46	-1.13	0.014763	1.83	0.0952789	1.43379	224.124	576.1	9.6	Down
M224T582	10194	22122.5	10978.9	43980.2	8928.84	13097.2	8328.71	6180.06	77984.6	459485	66877	19400.2	26044.9	401090	666653	40759.2	219787	72430.8	114.49	15476.3	10586.4	80.66	14.2	3.83	0.0018648	2.73	0.0275628	1.79517	224.047	581.9	9.7	Up
M224T705	1.41034e+06	701192	486827	1.33546e+06	1.00103e+06	147214	714480	410749	817598	2.86593e+06	3.53974e+06	1.27931e+06	1.43461e+06	1.22313e+06	894703	2.12837e+06	1.77292e+06	1.35696e+06	55.54	775911	707836	57.39	2.28	1.19	0.0206682	1.68	0.117429	1.47484	224.091	705.1	11.8	Up
M224T99_2	8.04072e+07	6.99731e+07	5.42769e+07	7.64624e+07	8.27355e+07	8.06795e+07	9.55441e+07	8.0997e+07	3.43941e+07	8.17541e+07	1.57696e+07	7.53233e+07	7.14219e+07	7.43104e+07	1.4151e+07	4.75742e+07	5.18373e+07	5.94981e+07	53.47	7.76345e+07	8.05434e+07	15.25	0.67	-0.58	0.0379176	1.42	0.171246	1.29484	224.113	99.2	1.7	Down
M225T102	4.50051e+06	1.68406e+06	2.57558e+06	4.72414e+06	3.74212e+06	4.56464e+06	3.3987e+06	2.54662e+06	3.15451e+06	2.73775e+06	989433	2.77479e+06	1.64386e+06	992033	3.31533e+06	683648	2.03642e+06	2.19081e+06	52.8	3.46705e+06	3.57041e+06	32.26	0.59	-0.77	0.0379176	1.42	0.171246	1.36642	225.131	101.6	1.7	Down
M225T413	2.62102e+06	3.973e+06	4.96792e+06	8.29965e+06	1.20015e+06	3.03485e+06	1.60545e+06	6.51524e+06	1.69377e+07	7.07022e+06	6.65202e+06	7.14911e+06	1.58916e+07	1.20838e+07	1.42182e+07	1.07171e+07	1.134e+07	1.14005e+07	36.37	4.02716e+06	3.50393e+06	60.93	2.82	1.49	0.0010878	2.96	0.0203124	1.85064	225.124	413.3	6.9	Up
M225T470	194305	123543	182450	155821	142673	204047	240011	190554	158798	345107	227203	570624	415708	349593	370395	507468	368112	359994	36.63	179175	186502	20.73	2.05	1.04	0.004662	2.33	0.0475536	1.83398	225.076	469.9	7.8	Up
M225T552	814759	524251	858579	471280	1.17485e+06	1.0546e+06	997695	302201	299803	227963	442395	461543	314675	624944	734748	201287	413420	378535	46	774777	836669	40.08	0.53	-0.91	0.014763	1.83	0.0952789	1.44728	225.06	551.7	9.2	Down
M225T724	1.83995e+06	1.41877e+06	2.0303e+06	1.24619e+06	2.95162e+06	2.37562e+06	1.51252e+06	1.15257e+06	526474	533554	800752	1.00923e+06	721498	1.48169e+06	1.19682e+06	115710	798217	761125	53.7	1.81594e+06	1.67624e+06	33.97	0.44	-1.19	0.0018648	2.73	0.0275628	1.60211	225.148	724	12.1	Down
M225T767	4.08031e+06	7.2243e+06	7.24358e+06	3.54701e+06	3.37669e+06	4.95545e+06	6.44394e+06	2.2183e+06	2.6672e+06	2.95513e+06	620520	4.5159e+06	3.16218e+06	1.04281e+06	521253	1.03525e+06	2.06503e+06	1.855e+06	70.75	4.8862e+06	4.51788e+06	38.9	0.42	-1.24	0.00699301	2.16	0.0602244	1.68152	225.148	767.4	12.8	Down
M225T801	662516	747229	473933	777921	548947	137168	509882	367547	141899	90355	515147	263598	134769	622075	367095	20806.3	269468	202749	79.66	528143	529414	39.9	0.51	-0.97	0.0379176	1.42	0.171246	1.2649	225.185	800.8	13.3	Down
M225T89	1.80511e+06	47541.8	226479	219636	402624	322562	46135.7	48795	1.92223e+06	6.10941e+06	2.68204e+06	529006	1.66815e+06	8.27419e+06	5.47195e+06	7.45024e+06	4.2634e+06	4.077e+06	68.54	389861	223057	150.66	10.94	3.45	0.000621601	3.21	0.0140919	2.00592	225.016	88.5	1.5	Up
M225T98	1.09008e+06	974487	1.55223e+06	867304	1.62893e+06	1.30612e+06	1.30822e+06	1.16849e+06	893446	211302	954453	888307	994297	1.18339e+06	1.06322e+06	173465	795234	923950	48.31	1.23698e+06	1.23731e+06	21.49	0.64	-0.64	0.0281274	1.55	0.141969	1.22509	224.624	98	1.6	Down
M225T99	2.47103e+06	1.743e+06	2.80053e+06	2.46802e+06	2.67647e+06	2.00463e+06	2.16186e+06	1.94135e+06	4.18679e+06	1.08538e+07	4.66678e+06	3.69472e+06	3.39881e+06	7.82534e+06	7.49024e+06	1.00549e+07	6.52142e+06	6.07851e+06	45.09	2.28336e+06	2.31494e+06	16.49	2.86	1.51	0.0001554	3.81	0.00610078	2.0784	225.116	99.2	1.7	Up
M226T156	1.67092e+06	227800	1.71304e+06	949059	1.80156e+06	1.08684e+06	1.4444e+06	1.26686e+06	181789	120325	82776.6	122222	606866	1.24504e+06	116049	713280	398544	152005	105.57	1.27006e+06	1.35563e+06	40.94	0.31	-1.67	0.0029526	2.53	0.0361958	1.66907	226.002	155.5	2.6	Down
M226T323	1.48775e+07	1.30245e+07	1.61633e+07	1.30584e+07	1.42521e+07	1.22108e+07	1.42169e+07	1.32219e+07	1.67708e+07	2.70968e+07	1.60054e+07	1.7648e+07	1.17433e+07	2.0729e+07	2.08511e+07	2.25895e+07	1.91792e+07	1.91885e+07	24.38	1.38782e+07	1.37194e+07	9.07	1.38	0.47	0.014763	1.83	0.0952789	1.60672	226.071	323.1	5.4	Up
M226T373	563243	471701	3.12414e+06	553830	487405	507164	484319	287241	3.67537e+06	1.19545e+07	8.30648e+06	4.70828e+06	5.20311e+06	4.41605e+06	1.99219e+06	1.06785e+07	6.36681e+06	4.95569e+06	55.65	809881	497284	115.94	7.86	2.97	0.0003108	3.51	0.00894927	2.17196	226.071	372.7	6.2	Up
M226T413	811177	497658	1.11454e+06	736922	1.18914e+06	230837	1.0989e+06	1.09388e+06	739612	206806	333042	797772	242376	242961	315596	138003	377021	279278	66.23	846631	952529	40.63	0.45	-1.17	0.0206682	1.68	0.117429	1.53745	226.127	413.3	6.9	Down
M226T566_2	501479	87646.1	267430	499001	616728	207997	209830	476188	528731	326161	578379	723773	1.0719e+06	1.08631e+06	790851	636470	717821	680121	36.55	358288	371809	52.44	2	1	0.004662	2.33	0.0475536	1.57654	226.159	566.1	9.4	Up
M226T63	1.52594e+06	2.19218e+06	1.70706e+06	2.97477e+06	1.91719e+06	1.48604e+06	1.36899e+06	2.27728e+06	2.43493e+06	2.71558e+06	2.12424e+06	3.01953e+06	2.46447e+06	2.62441e+06	2.21344e+06	2.94593e+06	2.56782e+06	2.54444e+06	12.51	1.93118e+06	1.81212e+06	27.72	1.33	0.41	0.0206682	1.68	0.117429	1.53783	225.899	62.6	1	Up
M227T126	5.75996e+06	1.27346e+06	877631	5.97878e+06	5.04447e+06	5.46006e+06	896432	799215	197100	248877	5.72623e+06	88797.6	20860.8	5.70853e+06	194606	247459	1.55406e+06	222280	165.43	3.26125e+06	3.15896e+06	75.94	0.48	-1.07	0.0379176	1.42	0.171246	1.38244	227.139	125.8	2.1	Down
M227T260	4.94512e+06	5.05541e+06	5.14096e+06	5.63159e+06	6.04797e+06	1.57958e+07	1.58135e+06	1.11908e+07	9.76732e+06	7.33722e+06	6.26325e+06	7.64752e+06	1.49968e+07	8.26982e+06	1.8105e+07	6.32583e+06	9.8391e+06	7.95867e+06	44.4	6.92363e+06	5.38628e+06	64.24	1.42	0.51	0.0498834	1.3	0.201689	1.05675	227.003	259.8	4.3	Up
M227T390	625616	880837	1.52901e+06	630309	2.58697e+06	2.20035e+06	2.08795e+06	2.89941e+06	4.16902e+06	1.20119e+06	2.95387e+06	2.65492e+06	3.51482e+06	2.1989e+06	2.23058e+06	2.75628e+06	2.70995e+06	2.7056e+06	33.03	1.68006e+06	1.80848e+06	53.34	1.61	0.69	0.0379176	1.42	0.171246	1.32871	227.175	389.5	6.5	Up
M227T737	6.74997e+06	6.19889e+06	7.76604e+06	6.42859e+06	6.40263e+06	7.72667e+06	7.67994e+06	7.35289e+06	3.00542e+06	1.87011e+06	4.41685e+06	5.4276e+06	4.00105e+06	8.08517e+06	7.64714e+06	1.55134e+06	4.50058e+06	4.20895e+06	54.24	7.0382e+06	7.05143e+06	9.42	0.64	-0.65	0.0498834	1.3	0.201689	1.44697	227.126	737.3	12.3	Down
M227T768	1.99679e+06	1.72718e+06	3.07256e+06	1.86814e+06	3.4216e+06	1.46018e+06	2.66644e+06	3.38111e+06	1.35135e+06	1.33251e+06	1.09458e+06	1.82705e+06	1.22385e+06	1.48685e+06	1.11947e+06	1.25634e+06	1.3365e+06	1.29442e+06	17.62	2.44925e+06	2.33161e+06	31.97	0.55	-0.87	0.0010878	2.96	0.0203124	1.86242	226.601	767.6	12.8	Down
M228T379_1	1.98478e+06	1.61509e+06	2.6268e+06	1.64987e+06	2.789e+06	1.57529e+06	3.01217e+06	2.93497e+06	3.5986e+06	2.72683e+06	2.52717e+06	2.6366e+06	2.99066e+06	3.36883e+06	3.05725e+06	4.43356e+06	3.16744e+06	3.02395e+06	19.82	2.2735e+06	2.30579e+06	27.65	1.39	0.48	0.0281274	1.55	0.141969	1.563	227.575	379	6.3	Up
M228T411	266848	237812	297606	289958	245006	73297.3	204536	184738	288600	823919	440263	222387	312348	925921	758656	813248	573168	599460	49.75	224975	241409	32.25	2.55	1.35	0.00699301	2.16	0.0602244	1.67971	227.834	410.6	6.8	Up
M228T573	34489.7	308434	158875	70887.8	256214	4412.37	160395	224613	901447	1.22487e+06	360851	219683	337756	246830	348083	243772	485412	342919	76.37	152290	159635	71.46	3.19	1.67	0.00699301	2.16	0.0602244	1.44789	228.042	573	9.6	Up
M228T690	971470	279722	225711	518212	428118	600737	212305	556449	385494	1.22489e+06	836076	977805	788941	368724	1.14971e+06	822613	819282	829345	38.36	474091	473165	53.02	1.73	0.79	0.0498834	1.3	0.201689	1.36953	228.186	689.8	11.5	Up
M228T768	2.06373e+07	7.89403e+06	3.0836e+07	2.13383e+07	1.19889e+07	2.05218e+07	1.63214e+07	3.97982e+07	3.46873e+07	5.5074e+07	4.55486e+07	5.83738e+07	3.85454e+07	5.35388e+07	3.17239e+07	2.53069e+07	4.28499e+07	4.2047e+07	28.29	2.1167e+07	2.05795e+07	48.09	2.02	1.02	0.0029526	2.53	0.0361958	1.79014	228.195	767.7	12.8	Up
M228T80	1.09543e+07	9.85539e+06	1.03975e+07	1.13734e+07	9.47586e+06	9.09315e+06	1.33777e+07	1.2312e+07	1.03867e+07	2.85986e+06	7.92322e+06	7.05567e+06	8.67286e+06	5.80443e+06	4.33244e+06	6.61862e+06	6.70673e+06	6.83714e+06	35.76	1.08549e+07	1.06759e+07	13.48	0.62	-0.69	0.0010878	2.96	0.0203124	1.72356	227.955	79.6	1.3	Down
M229T101	281403	248635	326127	342952	357474	305887	360338	309016	677319	480945	665901	698840	389383	545413	529679	617434	575614	581423	18.81	316479	317572	12.18	1.82	0.86	0.0001554	3.81	0.00610078	2.20009	229.073	101.2	1.7	Up
M229T102	2.64982e+06	4.06844e+06	2.37825e+06	3.6001e+06	2.31573e+06	2.95783e+06	2.2737e+06	2.36603e+06	1.48222e+06	1.17112e+06	1.18635e+06	1.96918e+06	1.35504e+06	1.66737e+06	1.57336e+06	1.70675e+06	1.51392e+06	1.52779e+06	18.05	2.82624e+06	2.51404e+06	23.81	0.54	-0.9	0.0001554	3.81	0.00610078	2.16548	229.088	102	1.7	Down
M229T215	3.62781e+07	4.13726e+07	4.00357e+07	2.99245e+08	2.01867e+07	1.20776e+07	2.79787e+08	2.55618e+07	5.64636e+08	1.15335e+09	4.07597e+08	2.30275e+08	6.3085e+08	1.10109e+09	8.66291e+08	1.02983e+09	7.4799e+08	7.48571e+08	45.58	9.43181e+07	3.81569e+07	128.3	7.93	2.99	0.000621601	3.21	0.0140919	2.05462	229.154	215	3.6	Up
M229T279	6.93989e+07	5.34268e+07	5.11865e+07	1.07665e+08	3.99807e+07	2.38483e+07	9.70715e+07	5.12577e+07	6.37979e+06	2.41269e+07	1.26272e+07	2.39395e+07	4.34428e+07	2.26399e+07	1.33279e+07	3.29499e+07	2.24293e+07	2.32897e+07	53.13	6.17294e+07	5.23423e+07	45.88	0.36	-1.46	0.0029526	2.53	0.0361958	1.8066	229.154	279.3	4.7	Down
M229T421	279930	494555	315613	145921	321965	301350	589188	210498	229630	199595	107417	282677	287167	227816	232865	97300.7	208058	228723	34.36	332378	308482	43.45	0.63	-0.68	0.0498834	1.3	0.201689	1.24959	229.138	421	7	Down
M229T471	156182	120152	89706.5	160342	151460	75524.7	41707.4	69272.9	227969	278721	319736	168602	68254.3	241280	230632	236742	221492	233687	34.11	108043	104929	41.95	2.05	1.04	0.00699301	2.16	0.0602244	1.56555	229.028	470.9	7.8	Up
M229T562	585833	474005	705747	837848	763457	491967	1.2876e+06	746652	44926.4	33657.6	16164.5	3255.44	9616.41	5154.33	8395.77	11938.4	16638.6	10777.4	89.16	736638	726200	35.07	0.02	-5.47	0.0001554	3.81	0.00610078	2.3779	229.191	562.4	9.4	Down
M230T112	477751	309160	406474	213766	585772	177580	844944	317289	263673	7319.75	166958	199712	201091	295357	16529.3	426864	197188	200402	70.8	416592	361881	52.56	0.47	-1.08	0.0281274	1.55	0.141969	1.25656	230.122	112.2	1.9	Down
M230T114	2.55125e+07	3.3325e+07	2.42968e+07	2.74596e+07	3.97243e+07	3.40826e+07	6.23989e+07	5.10026e+07	1.12579e+07	1.89025e+07	1.46062e+07	1.70254e+07	1.34855e+07	1.07859e+07	1.10846e+07	1.31906e+07	1.37923e+07	1.3338e+07	21.31	3.72253e+07	3.37038e+07	35.96	0.37	-1.43	0.0001554	3.81	0.00610078	2.16972	229.974	114.4	1.9	Down
M230T122_2	9.86319e+07	3.37317e+07	9.0366e+07	7.8268e+07	5.93242e+07	1.478e+08	6.03827e+07	8.59037e+07	2.0139e+08	7.75656e+08	2.77798e+08	1.78346e+08	2.54452e+08	3.00122e+08	4.65855e+08	3.18024e+08	3.46455e+08	2.8896e+08	56.04	8.18011e+07	8.20858e+07	41.37	4.24	2.08	0.0001554	3.81	0.00610078	2.16225	230.157	122.1	2	Up
M230T148	2.81819e+08	2.4476e+08	3.63382e+08	3.47875e+08	8.26216e+07	4.68543e+08	3.4542e+08	2.29327e+08	3.21394e+08	6.08479e+08	7.17297e+08	8.64352e+08	4.63102e+08	4.49463e+08	2.54186e+08	6.50323e+08	5.41074e+08	5.3579e+08	38.07	2.95469e+08	3.1362e+08	38.85	1.83	0.87	0.0281274	1.55	0.141969	1.40414	230.157	148.3	2.5	Up
M230T208	8.4839e+06	4.94671e+06	1.38896e+07	7.61356e+06	9.53184e+06	1.06016e+07	9.37958e+06	1.02754e+07	5.49487e+06	4.36629e+07	1.77024e+07	1.49853e+07	1.40532e+07	1.62957e+07	3.22597e+07	2.93097e+07	2.17205e+07	1.6999e+07	56.74	9.34028e+06	9.45571e+06	27.51	2.33	1.22	0.00699301	2.16	0.0602244	1.56421	230.157	208.3	3.5	Up
M230T227	7.03436e+06	8.01962e+06	8.04764e+06	6.49624e+06	7.19206e+06	5.9943e+06	6.70245e+06	5.96234e+06	8.8233e+06	8.84466e+06	1.05439e+07	8.35402e+06	9.50603e+06	7.94606e+06	5.12283e+06	1.08384e+07	8.74741e+06	8.83398e+06	20.32	6.93113e+06	6.8684e+06	11.65	1.26	0.34	0.0206682	1.68	0.117429	1.28913	230.157	227.3	3.8	Up
M230T257	3.63559e+06	2.75758e+06	6.14064e+06	2.24139e+06	9.14977e+06	4.80745e+06	5.54049e+06	6.76636e+06	8.87609e+06	8.54429e+06	6.87372e+06	7.82887e+06	8.40475e+06	7.8836e+06	6.07704e+06	6.44776e+06	7.61702e+06	7.85624e+06	13.56	5.12991e+06	5.17397e+06	44.41	1.48	0.57	0.0281274	1.55	0.141969	1.53665	230.158	256.5	4.3	Up
M230T321	431827	1.06703e+06	582643	447334	513437	666338	538465	471899	408625	57692	466848	469385	356631	432843	457200	378222	378431	420734	35.94	589871	525951	35.17	0.64	-0.64	0.00699301	2.16	0.0602244	1.19329	230.158	321.1	5.4	Down
M230T507	245995	283453	685020	459573	292616	271587	1.27815e+06	771398	127233	162638	158603	277048	430184	198616	135161	183470	209119	173054	48.21	535973	376094	67.32	0.39	-1.36	0.004662	2.33	0.0475536	1.63851	230.118	507	8.4	Down
M230T704	4.49162e+06	5.12288e+06	7.23798e+06	2.51338e+06	3.84342e+06	1.16362e+07	3.1836e+06	2.93038e+06	1.39787e+06	1.46064e+06	1.40271e+06	3.63397e+06	1.51338e+06	3.99376e+06	3.02536e+06	748675	2.14705e+06	1.48701e+06	56.6	5.11994e+06	4.16752e+06	59.2	0.42	-1.25	0.014763	1.83	0.0952789	1.63665	230.211	704.2	11.7	Down
M230T768	5.1896e+06	4.66108e+06	3.01939e+06	8.60862e+06	914308	1.5632e+06	7.12755e+06	8.73205e+06	1.46163e+07	1.17517e+07	1.10841e+07	1.11264e+07	1.72649e+07	1.00198e+07	1.07016e+07	1.83608e+07	1.31157e+07	1.1439e+07	24.51	4.97697e+06	4.92534e+06	60.78	2.64	1.4	0.0001554	3.81	0.00610078	1.77234	230.248	768	12.8	Up
M230T771	1.16386e+07	8.32892e+06	1.16911e+07	7.29615e+06	8.56009e+06	9.0111e+06	1.06513e+07	1.33916e+07	1.85878e+07	1.22172e+07	1.24483e+07	1.47093e+07	2.26948e+07	1.92811e+07	1.69398e+07	2.14022e+07	1.72851e+07	1.77638e+07	22.7	1.00711e+07	9.83122e+06	20.76	1.72	0.78	0.000621601	3.21	0.0140919	1.97823	230.14	770.8	12.8	Up
M231T137	4.75228e+06	8.0275e+06	5.75175e+06	6.17551e+06	6.31703e+06	3.91753e+06	7.73051e+06	8.00582e+06	2.41807e+06	2.397e+06	918071	889898	1.64508e+06	509378	3.38823e+06	505333	1.58388e+06	1.28157e+06	66.9	6.33474e+06	6.24627e+06	24.1	0.25	-2	0.0001554	3.81	0.00610078	2.07712	230.982	136.8	2.3	Down
M231T362	6.60786e+06	6.73267e+06	6.29572e+06	8.14724e+06	1.85135e+07	1.8434e+07	2.71094e+07	6.05508e+06	2.97592e+07	5.27906e+07	3.83458e+07	5.89033e+06	3.16691e+07	2.02517e+07	3.39842e+07	2.68101e+07	2.99376e+07	3.07141e+07	45.42	1.22369e+07	7.43996e+06	65.61	2.45	1.29	0.0206682	1.68	0.117429	1.55659	231.144	362.3	6	Up
M231T384	4.52596e+06	1.10789e+07	3.91234e+06	1.0086e+07	5.81584e+06	3.30382e+06	3.83877e+06	2.8712e+06	1.05114e+06	2.25282e+06	3.81577e+06	3.62269e+06	2.14577e+06	2.0084e+06	3.40683e+06	3.38823e+06	2.71146e+06	2.82052e+06	36.28	5.6791e+06	4.21915e+06	55.67	0.48	-1.07	0.0104118	1.98	0.0771942	1.57273	231.124	383.8	6.4	Down
M231T390	462623	643856	97444	867268	79000.3	444320	323258	774044	937542	1.55166e+06	1.23408e+06	859297	1.25711e+06	456098	828200	391223	939401	898419	42.49	461477	453471	63.12	2.04	1.03	0.0281274	1.55	0.141969	1.34987	231.17	389.5	6.5	Up
M231T704	102178	236513	72905.1	135155	128527	61827.8	82718.5	87971.7	436251	496497	2.24369e+06	122631	146621	123807	946438	413033	616121	424642	115.62	113474	95074.7	49.26	5.43	2.44	0.00699301	2.16	0.0602244	1.64588	231.215	704.1	11.7	Up
M232T116	311538	290419	304095	344248	304611	308459	356939	332560	402412	683925	539206	475942	343165	501880	354156	618965	489956	488911	24.96	319109	309999	7.18	1.54	0.62	0.0010878	2.96	0.0203124	1.89278	232.081	115.8	1.9	Up
M232T370	2.55289e+06	2.8581e+06	5.02544e+06	3.17176e+06	3.39935e+06	1.90504e+06	5.13943e+06	5.00924e+06	1.38416e+07	4.3337e+06	1.06875e+07	5.8278e+06	1.06538e+07	5.2596e+06	7.64983e+06	1.0023e+07	8.53461e+06	8.83641e+06	38.6	3.63265e+06	3.28555e+06	34.7	2.35	1.23	0.0010878	2.96	0.0203124	1.89538	232.154	370.5	6.2	Up
M232T379	1.364e+08	8.46814e+07	1.55791e+08	1.36797e+07	1.55288e+08	9.1577e+07	2.04079e+08	1.12966e+08	5.6712e+07	1.38949e+07	5.38559e+06	1.2631e+07	1.08882e+07	8.95577e+07	5.23613e+06	5.46568e+07	3.11203e+07	1.3263e+07	101.64	1.19308e+08	1.24683e+08	48.33	0.26	-1.94	0.0029526	2.53	0.0361958	1.66717	232.154	378.6	6.3	Down
M232T582_1	2.23371e+06	2.55503e+06	2.80408e+06	2.46335e+06	4.0018e+06	2.34772e+06	2.32429e+06	1.9402e+06	1.33119e+06	965732	1.92708e+06	1.8061e+06	1.55726e+06	1.82548e+06	2.34139e+06	913896	1.58351e+06	1.68168e+06	31.07	2.58377e+06	2.40553e+06	24.19	0.61	-0.71	0.0010878	2.96	0.0203124	1.72166	232.17	582	9.7	Down
M232T99	463660	388481	606287	806478	889238	941168	588591	518024	980883	2.92905e+06	1.41418e+06	938979	1.1183e+06	783244	966432	865639	1.24959e+06	973657	56.41	650241	597439	31.45	1.92	0.94	0.004662	2.33	0.0475536	1.65618	232.129	99.4	1.7	Up
M233T100	178002	1.10785e+06	1.40488e+06	543852	1.18556e+06	1.88596e+06	2.67522e+06	1.1968e+06	817227	16616.3	330198	175975	173662	107520	58441.9	135064	226838	154363	112.99	1.27227e+06	1.19118e+06	60.38	0.18	-2.49	0.0010878	2.96	0.0203124	1.81827	233.149	100.3	1.7	Down
M233T109_1	2.48956e+06	4.00512e+06	2.44253e+06	4.40242e+06	3.11196e+06	1.93697e+06	2.27302e+06	2.79927e+06	7.36262e+06	2.60773e+06	4.19366e+06	3.65004e+06	4.87836e+06	4.16329e+06	3.81924e+06	5.77319e+06	4.55602e+06	4.17848e+06	32.03	2.93261e+06	2.64442e+06	29.46	1.55	0.64	0.0206682	1.68	0.117429	1.48944	233.059	109	1.8	Up
M233T679	821638	957346	320606	368963	175987	210799	637412	796615	998548	912598	1.06059e+06	1.06625e+06	1.02425e+06	894835	653595	761541	921527	955573	16.14	536171	503187	56.7	1.72	0.78	0.0104118	1.98	0.0771942	1.50278	233.174	679	11.3	Up
M233T82	7.51934e+06	4.97842e+06	5.83328e+06	5.21987e+06	9.42158e+06	5.8981e+06	1.0245e+07	7.09537e+06	7.63459e+06	1.13226e+07	1.0112e+07	1.28622e+07	7.45114e+06	7.41645e+06	1.11091e+07	8.50051e+06	9.55107e+06	9.30626e+06	21.89	7.02637e+06	6.49673e+06	27.69	1.36	0.44	0.0281274	1.55	0.141969	1.47302	232.917	81.7	1.4	Up
M234T114_2	768126	935514	677224	918195	979116	1.03978e+06	1.78913e+06	1.37938e+06	285856	497920	391597	406438	293819	241163	252026	339436	338532	316628	26.08	1.06081e+06	957315	33.95	0.32	-1.65	0.0001554	3.81	0.00610078	2.24133	233.97	114.4	1.9	Down
M234T137	1.50622e+06	1.12213e+06	989557	1.17438e+06	3.0151e+06	2.81613e+06	1.16839e+06	1.05196e+06	2.39882e+06	4.54389e+06	4.21503e+06	4.71064e+06	3.21914e+06	2.70978e+06	2.93329e+06	3.66484e+06	3.54943e+06	3.44199e+06	24.54	1.60548e+06	1.17138e+06	51.36	2.21	1.14	0.0029526	2.53	0.0361958	1.98419	233.982	137	2.3	Up
M234T348	795196	624094	691564	921790	104585	303040	725002	703422	1.09165e+06	1.48725e+06	1.0309e+06	972774	1.59032e+06	580684	1.07999e+06	1.4682e+06	1.16272e+06	1.08582e+06	28.81	608587	697493	44.35	1.91	0.93	0.004662	2.33	0.0475536	1.4305	234.043	348.1	5.8	Up
M234T99	135667	529858	563887	112179	603906	651117	588968	560555	619354	601419	604053	760762	628566	617992	656728	648706	642197	623960	8.05	468267	562221	46.03	1.37	0.46	0.00699301	2.16	0.0602244	1.15223	234.108	98.6	1.6	Up
M235T102	3.70703e+06	2.75393e+06	3.78065e+06	3.91314e+06	2.69148e+06	2.61188e+06	3.84178e+06	3.01151e+06	4.22846e+06	4.11857e+06	3.36665e+06	4.47145e+06	3.84603e+06	3.80202e+06	2.88103e+06	4.55148e+06	3.90821e+06	3.9823e+06	14.48	3.28893e+06	3.35927e+06	17.39	1.19	0.25	0.0379176	1.42	0.171246	1.17883	234.957	102	1.7	Up
M235T341	315523	278857	454359	671888	610149	339510	581640	397793	1.15924e+06	850980	2.02006e+06	934548	825581	458744	1.00994e+06	356569	951959	892764	53.44	456215	426076	32.54	2.09	1.06	0.0104118	1.98	0.0771942	1.57235	235.066	341.1	5.7	Up
M235T483	2.15209e+07	2.18254e+07	1.73191e+07	1.7823e+07	2.01397e+07	1.18682e+07	2.69139e+07	1.04988e+07	2.40165e+07	1.95479e+07	2.3931e+07	2.57494e+07	2.63814e+07	2.49659e+07	2.19314e+07	2.68502e+07	2.41717e+07	2.44912e+07	10.09	1.84886e+07	1.89813e+07	29.16	1.31	0.39	0.0281274	1.55	0.141969	1.35376	235.181	483	8.1	Up
M235T531	163709	225320	159638	207948	61445.9	161577	121713	82011.6	72166.2	70085.6	120157	23960.8	73246.8	134814	52891.4	92511.5	79979.1	72706.5	44.47	147920	160608	38.48	0.54	-0.89	0.0206682	1.68	0.117429	1.46012	235.19	531.1	8.9	Down
M235T664	309014	139473	593135	349126	226226	458489	205862	184124	711473	190173	1.39008e+06	631362	597058	1.00261e+06	667034	1.07715e+06	783368	689254	46.55	308181	267620	50.05	2.54	1.35	0.004662	2.33	0.0475536	1.65538	235.133	664.3	11.1	Up
M236T309	1.79697e+06	2.23114e+06	2.11684e+06	2.00497e+06	1.90726e+06	2.17258e+06	1.85935e+06	2.68334e+06	2.47242e+06	2.16743e+06	2.97813e+06	2.2692e+06	2.65295e+06	2.48876e+06	2.60742e+06	2.67526e+06	2.53895e+06	2.54809e+06	9.95	2.09656e+06	2.0609e+06	13.48	1.21	0.28	0.014763	1.83	0.0952789	1.70511	236.003	309.2	5.2	Up
M236T350	4.16674e+06	8.52359e+06	4.2671e+06	8.04271e+06	5.30116e+06	4.82971e+06	4.34383e+06	3.2516e+06	2.55007e+06	2.6172e+06	3.30026e+06	3.1918e+06	2.68142e+06	1.66315e+06	2.72348e+06	2.93804e+06	2.70818e+06	2.70245e+06	18.53	5.3408e+06	4.58677e+06	35.79	0.51	-0.98	0.0003108	3.51	0.00894927	1.97781	236.128	350.4	5.8	Down
M236T387	285133	357824	459098	185111	183200	246664	237081	265365	370915	601191	872209	491158	526138	539822	606090	698943	588308	570507	25.39	277435	256015	33.27	2.12	1.08	0.0003108	3.51	0.00894927	2.04792	236.04	387.5	6.5	Up
M236T406	1.33989e+06	420236	1.89496e+06	627332	2.02421e+06	2.11939e+06	1.47904e+06	1.7902e+06	792644	309533	1.32994e+06	1.55669e+06	233962	1.42866e+06	281374	210881	767961	551089	76.52	1.46191e+06	1.63462e+06	43.57	0.53	-0.93	0.0281274	1.55	0.141969	1.23059	236.128	406.3	6.8	Down
M236T687	942168	402983	736608	1.53437e+06	702275	1.01589e+06	1.89784e+06	2.09656e+06	1.18063e+06	2.02169e+06	1.54732e+06	2.70328e+06	1.881e+06	5.04248e+06	1.70637e+06	1.92126e+06	2.2505e+06	1.90113e+06	53.72	1.16609e+06	979031	52.18	1.93	0.95	0.0281274	1.55	0.141969	1.50837	236.23	686.8	11.4	Up
M236T704	2.09316e+06	2.00754e+06	2.29704e+06	1.80626e+06	2.89625e+06	3.80254e+06	1.97165e+06	3.85668e+06	6.07192e+06	6.34834e+06	2.4427e+06	4.39282e+06	6.25125e+06	3.00214e+06	2.08327e+06	6.73809e+06	4.66632e+06	5.23237e+06	41.36	2.59139e+06	2.1951e+06	32.08	1.8	0.85	0.0206682	1.68	0.117429	1.47037	236.162	704.4	11.7	Up
M237T102	1.03776e+06	1.72941e+06	964928	950761	1.02503e+06	791167	1.22322e+06	1.0495e+06	981480	1.30755e+06	1.81598e+06	1.44212e+06	1.14211e+06	1.68184e+06	1.37901e+06	1.35649e+06	1.38832e+06	1.36775e+06	19.36	1.09647e+06	1.0314e+06	25.78	1.27	0.34	0.0379176	1.42	0.171246	1.27839	236.928	102	1.7	Up
M237T341	3.43596e+06	2.88951e+06	3.817e+06	4.36511e+06	2.25072e+06	5.23464e+06	3.68626e+06	3.30123e+06	3.16621e+06	9.19236e+06	7.31e+06	6.65658e+06	4.75974e+06	5.15163e+06	5.10912e+06	7.73384e+06	6.13494e+06	5.90411e+06	31.58	3.62255e+06	3.56111e+06	25.02	1.69	0.76	0.014763	1.83	0.0952789	1.66861	237.087	341.3	5.7	Up
M237T483	108860	87496.5	188491	61630.6	183612	60817.5	262005	331383	782200	621622	851379	617817	764920	722695	642921	826981	728817	743807	12.71	160537	146236	61.63	4.54	2.18	0.0001554	3.81	0.00610078	2.23923	237.186	483.2	8.1	Up
M237T77_2	1.47796e+06	1.35591e+06	1.4247e+06	357582	950441	1.10179e+06	1.2017e+06	900195	1.1003e+06	1.24564e+06	270341	231462	1.07623e+06	207454	242582	255170	578648	262756	80.94	1.09629e+06	1.15175e+06	33.38	0.53	-0.92	0.0281274	1.55	0.141969	1.43208	237.069	76.5	1.3	Down
M237T89	331829	1.33908e+06	1.49028e+06	1.74757e+06	728158	703636	1.0621e+06	1.73823e+06	2.65406e+06	1.393e+06	1.4723e+06	1.54209e+06	2.3697e+06	2.19936e+06	1.61769e+06	3.05612e+06	2.03804e+06	1.90852e+06	30.53	1.14261e+06	1.20059e+06	45.7	1.78	0.83	0.0206682	1.68	0.117429	1.50146	237.016	88.6	1.5	Up
M238T412	106728	96645.1	124219	275732	153207	75600	131134	94297.9	611735	661216	580758	128428	620090	544590	716942	574941	554838	596246	32.53	132195	115474	47.55	4.2	2.07	0.0010878	2.96	0.0203124	2.10088	238.165	411.5	6.9	Up
M238T465	26282.8	199337	198443	238598	224556	33808.3	210743	89297.8	519746	997260	572382	88049.6	326518	130849	538307	468054	455146	493900	62.99	152633	198890	57.71	2.98	1.58	0.0281274	1.55	0.141969	1.42514	238.11	465	7.8	Up
M238T589	271186	234178	90486.5	116533	60199.4	54271.8	274096	114132	260559	300110	383419	273237	543534	285408	282111	300332	328589	292759	28.76	151885	115332	61.12	2.16	1.11	0.0010878	2.96	0.0203124	1.7284	238.165	588.6	9.8	Up
M238T593	83147.8	261422	241163	213180	395756	563259	165159	152951	71596	96978.2	82069.9	113380	121525	331224	155365	68881.8	130127	105179	66.24	259505	227172	59.1	0.5	-1	0.0281274	1.55	0.141969	1.35531	238.142	592.6	9.9	Down
M239T201	1.69423e+06	2.1485e+06	2.51742e+06	2.30179e+06	1.77604e+06	2.21632e+06	2.21046e+06	2.22027e+06	2.88762e+06	6.64391e+06	3.48179e+06	3.63171e+06	3.32946e+06	5.76343e+06	5.51481e+06	6.46274e+06	4.71443e+06	4.57326e+06	32.53	2.13563e+06	2.21339e+06	12.72	2.21	1.14	0.0001554	3.81	0.00610078	2.1033	239.105	200.6	3.3	Up
M239T384	1.23183e+07	3.99928e+07	7.55968e+07	2.28303e+07	6.93403e+07	5.156e+06	9.8846e+07	8.56441e+07	2.96651e+08	8.51284e+07	2.93222e+08	7.53274e+07	2.14112e+08	1.26e+07	1.03118e+08	2.37701e+08	1.64732e+08	1.58615e+08	66.08	5.12156e+07	5.46666e+07	69.79	3.22	1.69	0.0281274	1.55	0.141969	1.3018	239.148	384.3	6.4	Up
M239T704	226439	69168.5	80476.4	208062	50132.6	72823	110254	124141	164202	328590	306075	313180	190200	204151	278411	156103	242614	241281	29.37	117687	95365.1	56	2.06	1.04	0.0104118	1.98	0.0771942	1.7551	239.175	704.2	11.7	Up
M239T730	544769	184819	502687	190308	263526	126408	279912	213649	513968	634812	4.57483e+06	622608	361015	290321	884985	724903	1.07593e+06	628710	132.59	288260	238588	53.18	3.73	1.9	0.0029526	2.53	0.0361958	1.55828	239.127	729.7	12.2	Up
M240T222	372133	570987	387280	508815	596539	380376	425007	516072	612149	9.21246e+06	685700	769665	690056	5.8234e+06	7.72761e+06	3.27519e+06	3.59953e+06	2.02243e+06	98.21	469651	466911	19.1	7.66	2.94	0.0001554	3.81	0.00610078	1.70183	240.034	222.4	3.7	Up
M240T380	1.18114e+06	1.78311e+06	1.72711e+06	2.12579e+06	2.07821e+06	994851	1.28668e+06	2.40941e+06	3.38272e+06	3.56041e+06	5.23658e+06	2.17449e+06	3.56959e+06	533565	2.62575e+06	2.75347e+06	2.97957e+06	3.06809e+06	45.29	1.69829e+06	1.75511e+06	29.63	1.75	0.81	0.014763	1.83	0.0952789	1.05392	240.179	380	6.3	Up
M240T412	171398	188383	106079	170026	130864	116871	142234	179186	268064	551225	431519	289013	322514	238854	251566	218129	321360	278538	35.52	150630	156130	20.44	2.13	1.09	0.0001554	3.81	0.00610078	2.05049	240.144	411.9	6.9	Up
M240T548	329164	178660	346601	147447	432320	306175	257217	160034	514057	492745	549056	495599	213192	364697	319827	291074	405031	428721	30.55	269702	281696	37.77	1.5	0.59	0.0498834	1.3	0.201689	1.32698	240.171	548.2	9.1	Up
M240T569	2.66416e+06	724367	2.23621e+06	433636	2.5272e+06	1.47354e+06	1.92207e+06	1.47275e+06	254199	93617	33735.2	24790.3	64974.4	288299	23597.9	105257	111059	79295.7	93.47	1.68174e+06	1.6978e+06	48.24	0.07	-3.92	0.0001554	3.81	0.00610078	2.20383	240.16	568.5	9.5	Down
M241T105	1.88854e+06	2.29394e+06	2.06022e+06	55283.2	3.04032e+06	1.82164e+06	2.40318e+06	2.70716e+06	9.32851e+06	7.23801e+06	8.13131e+06	4.09182e+06	6.75929e+06	8.02261e+06	5.96549e+06	4.97257e+06	6.8137e+06	6.99865e+06	25.55	2.03379e+06	2.17708e+06	44.18	3.35	1.74	0.0001554	3.81	0.00610078	1.64926	241.121	104.9	1.7	Up
M241T208	6.40551e+07	8.38943e+06	6.74287e+06	7.38389e+07	7.44436e+07	6.87158e+07	1.2564e+07	7.78431e+06	6.82196e+06	8.27962e+06	4.63082e+07	3.6005e+06	4.2644e+06	5.3345e+07	6.17276e+06	6.43412e+06	1.69033e+07	6.62804e+06	121.04	3.95668e+07	3.83096e+07	83.44	0.43	-1.23	0.0281274	1.55	0.141969	1.00777	241.155	208.2	3.5	Down
M241T386	2.73038e+06	6.9286e+06	2.94856e+06	5.76632e+06	5.68943e+06	4.70422e+06	3.17493e+06	2.24919e+06	1.71033e+06	1.43144e+06	2.72142e+06	2.19768e+06	1.61777e+06	586719	1.96956e+06	1.27843e+06	1.68917e+06	1.66405e+06	37.83	4.27395e+06	3.93958e+06	40.44	0.4	-1.34	0.0003108	3.51	0.00894927	1.88499	241.118	385.9	6.4	Down
M241T398	2.02838e+07	5.62833e+07	2.73452e+07	4.24827e+07	4.91325e+07	4.49511e+07	2.75485e+07	1.59141e+07	3.63884e+06	2.69926e+06	1.86446e+07	1.78259e+07	1.13285e+07	3.31838e+06	1.71967e+07	7.65959e+06	1.0289e+07	9.49403e+06	67.01	3.54927e+07	3.50156e+07	41.25	0.29	-1.79	0.0010878	2.96	0.0203124	1.87906	241.118	398.4	6.6	Down
M241T679	22541.6	99265.5	38784.2	29253.9	28656.2	113996	128576	96173.6	170352	927965	220866	72153.8	134141	436697	514456	471972	368575	328781	76.29	69655.9	67478.9	63.05	5.29	2.4	0.0018648	2.73	0.0275628	1.84407	241.191	678.8	11.3	Up
M241T83	1.74177e+06	2.0515e+06	283868	1.66232e+06	1.29779e+06	2.41331e+06	2.08062e+06	1.49404e+06	1.8369e+06	5.73943e+06	3.49265e+06	2.88483e+06	2.36587e+06	1.35548e+06	2.81244e+06	2.93832e+06	2.92824e+06	2.84863e+06	45.12	1.62815e+06	1.70204e+06	39.86	1.8	0.85	0.0206682	1.68	0.117429	1.29021	241.13	83.2	1.4	Up
M242T113	752071	511353	855735	808315	314929	453677	1.09284e+06	923935	924512	6.18298e+06	1.0274e+06	701938	870378	3.80083e+06	4.33186e+06	5.17715e+06	2.87713e+06	2.41411e+06	77.92	714107	780193	36.9	4.03	2.01	0.014763	1.83	0.0952789	1.60045	242.114	113	1.9	Up
M242T137	4.5361e+06	4.52079e+06	5.5836e+06	4.77652e+06	4.74941e+06	4.72139e+06	5.76553e+06	1.44347e+06	1.17936e+06	3.657e+06	4.26581e+06	3.88387e+06	1.01244e+06	4.55899e+06	3.04221e+06	1.13404e+06	2.84171e+06	3.34961e+06	52.86	4.5121e+06	4.7354e+06	29.39	0.63	-0.67	0.00699301	2.16	0.0602244	1.19127	242.002	136.9	2.3	Down
M242T228	2.18171e+06	3.22069e+06	2.26032e+06	3.14077e+06	1.81632e+06	1.04195e+06	5.03534e+06	2.88565e+06	1.1388e+06	1.08253e+06	1.45042e+06	1.66441e+06	1.2968e+06	1.63962e+06	733368	1.6818e+06	1.33597e+06	1.37361e+06	25.31	2.69784e+06	2.57298e+06	44.18	0.5	-1.01	0.00699301	2.16	0.0602244	1.69171	242.158	228.1	3.8	Down
M242T428	93594.3	245602	138512	116320	81033.6	36998.8	168414	408661	804878	1.20084e+06	884865	149669	253370	2.07251e+06	1.62626e+06	3.21673e+06	1.27614e+06	1.04285e+06	79.57	161142	127416	73.19	7.92	2.99	0.0018648	2.73	0.0275628	1.88078	242.102	428.1	7.1	Up
M242T573	1.05073e+06	616112	492306	1.433e+06	196505	105292	850739	1.40881e+06	1.88625e+06	1.9406e+06	1.17429e+06	1.3644e+06	1.46015e+06	1.10665e+06	1.18103e+06	1.61362e+06	1.46587e+06	1.41228e+06	22.02	769187	733425	66.01	1.91	0.93	0.0104118	1.98	0.0771942	1.4349	241.705	572.7	9.5	Up
M242T765	1.1267e+07	1.39463e+07	1.35271e+07	7.65124e+06	3.41606e+06	3.31454e+06	1.18824e+07	1.42387e+07	1.47996e+07	1.79184e+07	1.75031e+07	1.25299e+07	2.02534e+07	2.15764e+07	1.46002e+07	1.66103e+07	1.69739e+07	1.70567e+07	17.72	9.90543e+06	1.15747e+07	45.89	1.71	0.78	0.0010878	2.96	0.0203124	1.50977	242.284	764.9	12.7	Up
M242T91	3.29691e+06	4.20612e+06	6.90832e+06	2.87409e+06	9.63619e+06	1.11347e+07	5.71882e+06	4.54362e+06	591631	1.63342e+06	3.40819e+06	3.39158e+06	2.33902e+06	4.0031e+06	3.07315e+06	1.30218e+06	2.46779e+06	2.70609e+06	48.56	6.03985e+06	5.13122e+06	49.63	0.41	-1.29	0.00699301	2.16	0.0602244	1.60208	242.069	90.8	1.5	Down
M243T116_1	3.94844e+06	2.04021e+07	2.79993e+06	2.80521e+06	2.33257e+06	1.73173e+06	3.03607e+06	2.89812e+06	1.52459e+06	1.74029e+06	2.66865e+06	3.35913e+06	1.50008e+06	1.45836e+06	1.2637e+06	1.4524e+06	1.8709e+06	1.51234e+06	39.59	4.99427e+06	2.85167e+06	125.29	0.37	-1.42	0.014763	1.83	0.0952789	1.37679	242.562	115.8	1.9	Down
M243T116_3	337320	96330.9	429443	52556.6	684186	36382.8	584248	452658	179110	936543	1.03188e+06	801506	945599	1.13625e+06	946149	863909	855119	941071	34.05	334141	383382	74.41	2.56	1.36	0.0029526	2.53	0.0361958	1.52624	243.063	115.5	1.9	Up
M243T116_4	165994	104635	104811	154895	437142	446754	104581	100921	107190	881329	694534	115266	488187	1.93536e+06	1.23215e+06	1.19733e+06	831418	787932	74.55	202467	129853	74.05	4.11	2.04	0.0104118	1.98	0.0771942	1.51431	243.144	116.1	1.9	Up
M243T137	1.60755e+07	1.09375e+08	1.26415e+08	1.10607e+08	1.43198e+08	2.20422e+08	1.5097e+07	2.10525e+07	1.42379e+07	1.78043e+07	1.53074e+07	2.31766e+07	1.51045e+07	1.46631e+07	1.33815e+07	1.36684e+07	1.5918e+07	1.48838e+07	20.31	9.52803e+07	1.09991e+08	76.89	0.17	-2.58	0.00699301	2.16	0.0602244	1.7242	242.998	137.1	2.3	Down
M243T152	2.9521e+06	3.49658e+06	2.83244e+06	3.84952e+06	2.87263e+06	2.29502e+06	2.90273e+06	1.98036e+06	1.54373e+06	2.19347e+06	2.51769e+06	1.8134e+06	1.48095e+06	2.44612e+06	1.89876e+06	2.56434e+06	2.05731e+06	2.04612e+06	21.1	2.89767e+06	2.88768e+06	20.53	0.71	-0.49	0.00699301	2.16	0.0602244	1.65587	243.134	151.8	2.5	Down
M243T356	455284	2.93481e+06	1.05315e+06	950536	327166	648580	343919	474728	546704	3.48386e+06	616035	1.22871e+06	502744	4.36725e+06	4.83742e+06	5.04799e+06	2.57884e+06	2.35629e+06	79.38	898522	561654	96.34	2.87	1.52	0.0498834	1.3	0.201689	1.16688	243.103	356.4	5.9	Up
M243T405_2	847157	967593	1.23799e+06	1.73543e+06	888291	639243	1.19574e+06	1.1026e+06	2.78115e+06	3.69348e+06	2.83909e+06	1.37016e+06	2.54285e+06	1.63079e+06	2.41852e+06	2.89466e+06	2.52134e+06	2.662e+06	29.26	1.07676e+06	1.0351e+06	30.73	2.34	1.23	0.000621601	3.21	0.0140919	2.04713	242.844	405.2	6.8	Up
M243T724	825458	1.15529e+06	1.86437e+06	1.75361e+06	1.61275e+06	3.7962e+06	1.60972e+06	1.03191e+06	130519	504042	192786	568704	230916	1.91459e+06	885963	52017.7	559942	367479	109.47	1.70616e+06	1.61123e+06	54.02	0.33	-1.61	0.0104118	1.98	0.0771942	1.69083	243.159	724	12.1	Down
M243T80	2.8191e+08	4.34459e+08	2.90753e+08	4.9009e+08	2.77604e+08	4.2632e+08	3.04055e+08	3.45914e+08	3.84173e+08	6.25067e+08	4.96262e+08	3.59199e+08	4.48989e+08	4.35329e+08	4.60566e+08	5.29671e+08	4.67407e+08	4.54778e+08	18.01	3.56388e+08	3.24984e+08	23.18	1.31	0.39	0.014763	1.83	0.0952789	1.46356	242.924	80.1	1.3	Up
M244T114	1.03725e+06	1.2645e+06	746433	1.04686e+06	424192	557411	895780	777761	812920	703493	113731	713779	133903	170503	578185	761456	498496	640839	61.19	843773	836771	32.62	0.59	-0.76	0.0498834	1.3	0.201689	1.32171	244.113	114.4	1.9	Down
M244T365	2.82091e+06	1.87239e+06	3.28122e+06	2.5313e+06	1.00039e+06	919309	4.72516e+06	3.54056e+06	642470	527189	1.40849e+06	1.18009e+06	1.55163e+06	791251	1.199e+06	1.60209e+06	1.11278e+06	1.18954e+06	37.19	2.58641e+06	2.67611e+06	50.26	0.43	-1.22	0.0206682	1.68	0.117429	1.57026	244.186	365	6.1	Down
M244T373	2.71829e+06	8.05255e+06	1.06145e+07	6.06489e+06	1.03017e+07	8.66043e+06	1.10628e+07	7.4021e+06	1.1048e+07	9.09185e+06	1.22067e+07	1.06597e+07	8.15326e+06	1.10064e+07	1.06588e+07	1.23459e+07	1.06463e+07	1.0833e+07	13.4	8.10967e+06	8.35649e+06	34.2	1.31	0.39	0.0281274	1.55	0.141969	1.18366	244.081	372.8	6.2	Up
M244T381_1	4.93832e+06	7.73235e+07	2.56159e+07	1.18631e+07	2.76421e+07	3.62166e+07	1.77988e+07	1.93043e+07	2.55642e+07	1.37503e+08	4.07336e+07	4.0057e+07	3.82457e+07	1.20032e+08	5.59194e+07	7.60567e+07	6.67639e+07	4.83265e+07	61.88	2.75878e+07	2.24601e+07	80.78	2.42	1.28	0.014763	1.83	0.0952789	1.48591	243.684	380.5	6.3	Up
M244T429	171044	263284	150905	234969	197008	183224	138833	162909	290393	893812	633960	273970	654210	682328	934514	528753	611492	644085	39.83	187772	177134	22.67	3.26	1.7	0.0001554	3.81	0.00610078	2.13739	244.215	429	7.2	Up
M244T519	850018	265001	1.55646e+06	685830	923375	929302	1.63716e+06	1.48563e+06	2.1568e+06	1.81278e+06	1.70624e+06	1.53128e+06	2.01026e+06	1.43012e+06	1.65881e+06	1.40794e+06	1.71428e+06	1.68252e+06	15.66	1.0416e+06	926339	46.04	1.65	0.72	0.0104118	1.98	0.0771942	1.55611	244.202	519.3	8.7	Up
M244T526	973023	1.46415e+06	1.24945e+06	980619	1.9472e+06	1.32935e+06	2.54379e+06	2.34099e+06	118095	388868	103494	654100	177710	37605.8	71252.3	134843	210746	126469	98.99	1.60357e+06	1.39675e+06	37.65	0.13	-2.93	0.0001554	3.81	0.00610078	2.17427	244.227	525.6	8.8	Down
M244T560	261088	148326	323746	168087	132546	269572	267123	358104	320475	528317	289300	354875	323339	385585	554222	754221	438792	370230	36.58	241074	264105	34.4	1.82	0.86	0.00699301	2.16	0.0602244	1.69957	244.154	560	9.3	Up
M244T615_1	25084.7	161145	152794	274001	231595	43596.7	289292	199021	560664	740980	598105	156050	205792	360087	672816	685964	497557	579384	45.59	172066	180083	56.86	2.89	1.53	0.0104118	1.98	0.0771942	1.60331	244.133	615.2	10.3	Up
M244T758	8.06128e+07	1.70182e+08	2.50203e+08	1.0806e+08	1.94624e+08	3.80264e+08	1.97285e+08	1.63381e+08	6.59221e+07	3.91571e+07	9.54885e+07	1.273e+08	8.5277e+07	1.11091e+08	1.601e+08	6.64952e+07	9.38539e+07	9.03827e+07	41.07	1.93077e+08	1.82403e+08	47.79	0.49	-1.04	0.0104118	1.98	0.0771942	1.5559	244.264	757.6	12.6	Down
M244T76	571261	396704	314994	551754	935257	370238	736653	316704	1.13765e+06	2.34394e+06	2.19571e+06	930246	526074	365911	1.12378e+06	631147	1.15681e+06	1.02701e+06	64.03	524195	474229	42.28	2.21	1.14	0.0498834	1.3	0.201689	1.40579	244.11	75.7	1.3	Up
M244T820	2.2749e+06	967334	4.1313e+06	1.39542e+06	1.20195e+06	2.79681e+06	1.28648e+06	4.06058e+06	6.61337e+06	3.76596e+06	2.73725e+06	1.29833e+06	5.06369e+06	7.05279e+06	5.25763e+06	7.91782e+06	4.96335e+06	5.16066e+06	45.52	2.26435e+06	1.83516e+06	56.65	2.19	1.13	0.0206682	1.68	0.117429	1.49589	244.227	819.6	13.7	Up
M245T100_2	1.45537e+07	9.06428e+06	1.28445e+07	9.81592e+06	1.38836e+07	1.12431e+07	1.50565e+07	1.998e+07	1.00743e+07	1.18499e+07	9.02534e+06	1.69124e+06	1.53082e+06	9.89116e+06	1.06007e+07	1.17339e+07	8.29966e+06	9.98272e+06	50.99	1.33052e+07	1.33641e+07	26.06	0.62	-0.68	0.0379176	1.42	0.171246	1.18828	245.485	99.6	1.7	Down
M245T137	1.41914e+06	1.05193e+06	905816	1.01579e+06	1.01552e+06	855948	1.00664e+06	1.00117e+06	1.20064e+06	3.29012e+06	3.74045e+06	3.17426e+06	2.38509e+06	2.34713e+06	1.78689e+06	2.33783e+06	2.5328e+06	2.36611e+06	32.93	1.034e+06	1.01108e+06	16.32	2.45	1.29	0.0003108	3.51	0.00894927	2.1269	244.994	137	2.3	Up
M245T381	1.69851e+06	162702	1.60248e+06	1.27511e+06	1.7596e+06	1.36442e+06	85049.8	974443	2.081e+06	1.27662e+06	2.1645e+06	2.38583e+06	1.96668e+06	1.94757e+06	1.38296e+06	1.64581e+06	1.85637e+06	1.95712e+06	20.87	1.11529e+06	1.31976e+06	59.37	1.66	0.74	0.014763	1.83	0.0952789	1.23615	244.687	380.6	6.3	Up
M245T582	470066	493257	293199	469715	560760	297771	270614	385838	192145	112349	234823	395690	235503	255899	331802	131187	236175	235163	40.26	405153	427776	26.86	0.58	-0.78	0.00699301	2.16	0.0602244	1.62374	245.058	581.9	9.7	Down
M245T690_1	460655	376436	553642	850041	1.08027e+06	501152	439847	1.4478e+06	821339	977232	803921	1.70392e+06	1.47006e+06	1.3814e+06	1.95686e+06	2.12037e+06	1.40439e+06	1.42573e+06	36.06	713730	527397	53.36	1.97	0.98	0.014763	1.83	0.0952789	1.7017	245.175	689.9	11.5	Up
M245T72_1	3.20125e+06	3.77876e+06	5.62918e+06	3.4687e+06	6.60796e+06	7.98047e+06	2.61217e+06	3.35528e+06	1.74065e+06	372289	3.35993e+06	4.484e+06	2.87e+06	3.7705e+06	1.01814e+06	394848	2.25129e+06	2.30532e+06	70.56	4.57922e+06	3.62373e+06	42.03	0.49	-1.02	0.0498834	1.3	0.201689	1.40815	244.947	71.8	1.2	Down
M246T118	5.52678e+06	6.492e+06	6.05489e+06	5.30849e+06	4.95393e+06	5.3855e+06	6.66412e+06	4.76259e+06	7.80308e+06	1.55568e+07	1.07507e+07	5.57107e+06	7.56555e+06	1.0043e+07	1.28544e+07	1.57884e+07	1.07416e+07	1.03968e+07	35.02	5.64354e+06	5.45614e+06	12.3	1.9	0.93	0.0010878	2.96	0.0203124	1.87972	246.097	117.9	2	Up
M246T119	4.65823e+07	2.39913e+07	2.12837e+07	5.0695e+07	2.61616e+07	4.93087e+06	2.67895e+07	2.47002e+07	4.64691e+07	1.40909e+08	4.87436e+07	2.64036e+07	3.80463e+07	8.46254e+07	8.14872e+07	7.97744e+07	6.83073e+07	6.4259e+07	53.57	2.81418e+07	2.54309e+07	51.48	2.43	1.28	0.0104118	1.98	0.0771942	1.5394	246.109	119.5	2	Up
M246T417	27377.9	63033.2	60585.7	62290	38074.5	64268.4	71014.4	60292.1	142921	214248	196535	132378	128590	202323	257896	214628	186190	199429	25.02	55867	61437.9	26.74	3.33	1.74	0.0001554	3.81	0.00610078	2.26593	246.16	417.1	7	Up
M246T445	35604.2	79335	325808	441679	264936	70524.9	176527	4.67312e+06	733832	1.16721e+06	2.51867e+06	645530	6.00807e+06	5.28218e+06	8.33084e+06	1.61294e+06	3.28741e+06	2.0658e+06	87.72	758442	220731	209.37	4.33	2.12	0.0029526	2.53	0.0361958	1.78521	246.169	444.6	7.4	Up
M246T544	293701	91380	224924	59386.7	260643	234196	236206	134662	84102.7	127627	65719.9	119692	51889.4	251769	52492.4	86881.3	105022	85492	62.5	191887	229560	44.43	0.55	-0.87	0.0498834	1.3	0.201689	1.25674	246.17	543.8	9.1	Down
M246T676	2.66259e+07	2.96858e+07	4.41131e+07	2.57765e+07	3.97368e+07	4.52382e+07	3.00161e+07	2.64848e+07	1.63803e+07	8.85041e+06	2.05388e+07	2.12755e+07	1.45772e+07	3.26118e+07	3.15598e+07	1.30688e+07	1.98578e+07	1.84596e+07	42.95	3.34596e+07	2.9851e+07	24.54	0.59	-0.75	0.0206682	1.68	0.117429	1.62097	246.242	676.4	11.3	Down
M246T72	2.65058e+06	1.85375e+06	1.70273e+06	3.07853e+06	2.26949e+06	2.37002e+06	2.06401e+06	2.86856e+06	1.4471e+06	1.18537e+06	1.51501e+06	2.03761e+06	1.70104e+06	1.50315e+06	1.54614e+06	2.54349e+06	1.68486e+06	1.53057e+06	25.07	2.35721e+06	2.31975e+06	20.56	0.71	-0.48	0.00699301	2.16	0.0602244	1.58174	245.994	71.7	1.2	Down
M246T76	444138	501259	550999	571495	797632	421466	580816	609670	154127	228660	166415	228423	145533	228584	115733	403459	208867	197419	43.02	559684	561247	20.89	0.37	-1.42	0.0001554	3.81	0.00610078	2.17749	246.03	75.9	1.3	Down
M247T105_2	3.07583e+07	2.47017e+07	2.10474e+07	2.94609e+07	1.48051e+07	1.17489e+07	2.63304e+07	2.91178e+07	3.92201e+07	4.57369e+07	3.25183e+07	3.33954e+07	3.82201e+07	2.81611e+07	2.92716e+07	4.46618e+07	3.63982e+07	3.58077e+07	18.27	2.34963e+07	2.55161e+07	30.05	1.55	0.63	0.0029526	2.53	0.0361958	1.63681	247.112	105	1.8	Up
M247T121	2.40489e+06	1.02204e+06	2.29233e+06	1.51127e+06	5.16612e+06	2.01548e+06	5.3435e+06	3.46206e+06	5.47664e+06	5.73164e+06	8.27227e+06	4.77401e+06	4.37109e+06	3.83855e+06	4.79651e+06	5.20826e+06	5.30862e+06	5.00238e+06	25.26	2.90221e+06	2.34861e+06	55.67	1.83	0.87	0.014763	1.83	0.0952789	1.7049	247.14	121.5	2	Up
M247T294	62076.3	63552.8	63860.3	53944.7	69603.3	61418.5	142440	96200.7	132785	517313	63229.3	74114.9	63437.6	320278	303702	385316	232522	218243	74.4	76637.1	63706.5	38.38	3.03	1.6	0.0498834	1.3	0.201689	1.43587	247.126	294.4	4.9	Up
M247T312	452815	2.47272e+06	553058	277176	5.1473e+06	233056	4.18457e+06	615589	7.82763e+06	1.4726e+07	1.31733e+07	2.5638e+06	2.69329e+06	3.86592e+06	7.74665e+06	7.9654e+06	7.57026e+06	7.78714e+06	60.21	1.74204e+06	584324	112.45	4.35	2.12	0.004662	2.33	0.0475536	1.80429	247.21	311.5	5.2	Up
M247T391	368728	2.28521e+06	554234	684739	644409	977482	670098	617795	1.79142e+06	1.48532e+06	3.23718e+06	1.71883e+06	1.60809e+06	1.96123e+06	1.67595e+06	2.8372e+06	2.0394e+06	1.75513e+06	31.38	850336	657254	70.99	2.4	1.26	0.004662	2.33	0.0475536	1.9085	247.128	391.1	6.5	Up
M247T76	2.56725e+06	2.74646e+06	3.18431e+06	3.17782e+06	4.69312e+06	2.31553e+06	3.18413e+06	3.55176e+06	899315	1.37666e+06	1.15952e+06	1.35365e+06	878901	1.28632e+06	657566	2.08308e+06	1.21188e+06	1.22292e+06	35.97	3.17755e+06	3.18097e+06	23	0.38	-1.39	0.0001554	3.81	0.00610078	2.17687	247.037	76.2	1.3	Down
M247T89	7.16489e+06	8.2201e+06	9.16037e+06	1.11431e+07	7.93462e+06	6.2954e+06	1.06588e+07	7.85149e+06	1.39123e+07	1.72958e+07	1.80347e+07	1.13234e+07	9.93267e+06	1.43933e+07	1.50946e+07	1.72546e+07	1.46552e+07	1.4744e+07	19.87	8.5536e+06	8.07736e+06	19.52	1.71	0.78	0.000621601	3.21	0.0140919	2.02517	247.057	89	1.5	Up
M248T118	3.93175e+06	4.14658e+07	6.54745e+06	3.0988e+06	7.59556e+06	4.47034e+07	6.51257e+06	4.27179e+06	4.03476e+07	5.8567e+07	5.07917e+07	1.13949e+07	4.74065e+07	2.1589e+08	2.00648e+08	5.45623e+07	8.4951e+07	5.2677e+07	91.32	1.47659e+07	6.53001e+06	118.96	5.75	2.52	0.0018648	2.73	0.0275628	1.7938	248.113	117.6	2	Up
M248T158	504892	6.18074e+06	1.38747e+06	5.55276e+06	6.47024e+06	148780	5.17305e+06	8.04231e+06	2.6979e+07	3.28295e+07	4.05833e+07	1.07037e+07	2.93669e+07	1.18983e+07	2.00435e+07	1.95211e+07	2.39907e+07	2.35112e+07	43.13	4.18253e+06	5.36291e+06	72.63	5.74	2.52	0.0001554	3.81	0.00610078	1.84359	248.149	158.2	2.6	Up
M248T183	9.31444e+06	2.61013e+07	3.24643e+07	2.90226e+07	3.57e+07	2.69908e+07	3.39008e+07	2.52897e+07	3.9492e+07	5.37908e+07	4.29152e+07	3.74415e+07	3.60054e+07	3.22109e+07	3.12168e+07	3.65403e+07	3.87016e+07	3.69909e+07	18.47	2.7348e+07	2.80067e+07	30.05	1.42	0.5	0.004662	2.33	0.0475536	1.36425	248.149	183.5	3.1	Up
M248T351	160148	238435	214808	257142	153658	216427	115929	213962	351860	487325	397863	457425	405088	345511	490720	290310	403263	401475	17.89	196314	214385	24.45	2.05	1.04	0.0001554	3.81	0.00610078	2.14255	247.652	351.1	5.9	Up
M248T62	8.6592e+06	8.13873e+06	7.15514e+06	7.86589e+06	7.44713e+06	6.82349e+06	9.11021e+06	7.656e+06	5.71949e+06	3.04981e+06	5.8057e+06	9.46907e+06	6.66183e+06	7.02226e+06	4.97854e+06	5.8489e+06	6.06945e+06	5.8273e+06	30.1	7.85697e+06	7.76095e+06	9.7	0.77	-0.37	0.014763	1.83	0.0952789	1.4074	247.913	61.8	1	Down
M249T82	4.94692e+06	85401.8	8.65243e+06	7.55956e+06	92599.2	1.02072e+07	1.00071e+07	7.06767e+06	4.27933e+07	1.77117e+08	6.60116e+07	8.04753e+06	2.40339e+07	1.09097e+07	8.13828e+07	5.5045e+07	5.81676e+07	4.89191e+07	93.95	6.07737e+06	7.31361e+06	66.78	9.57	3.26	0.0010878	2.96	0.0203124	1.66168	248.89	81.8	1.4	Up
M249T93	6.71104e+06	5.8069e+06	5.55008e+06	6.49412e+06	9.57391e+06	6.67966e+06	9.15054e+06	6.77611e+06	1.08372e+07	1.18632e+07	1.07216e+07	1.01484e+07	7.13285e+06	6.67668e+06	6.70346e+06	8.15196e+06	9.02942e+06	9.1502e+06	23.2	7.09279e+06	6.69535e+06	20.77	1.27	0.35	0.0498834	1.3	0.201689	1.26498	249.158	92.8	1.5	Up
M250T72	164994	638845	160834	687092	139100	155311	160930	651238	751181	740257	727058	728151	733208	778824	773402	832638	758090	745719	4.75	344793	162962	75.61	2.2	1.14	0.0001554	3.81	0.00610078	1.78416	249.968	71.7	1.2	Up
M250T745	7.42873e+07	5.92386e+07	6.78081e+07	9.24973e+07	1.15388e+08	6.44586e+07	8.52891e+07	9.747e+07	1.06335e+08	1.19852e+08	1.04077e+08	7.25106e+07	1.19636e+08	9.9578e+07	7.99079e+07	2.07008e+08	1.13613e+08	1.05206e+08	36.39	8.20547e+07	7.97882e+07	23.31	1.38	0.47	0.0379176	1.42	0.171246	1.27948	250.178	744.5	12.4	Up
M250T751	1.51091e+06	878458	1.63605e+06	1.54114e+06	1.37536e+06	1.85199e+06	1.17258e+06	1.39119e+06	5.41651e+06	2.48649e+06	3.29371e+06	1.4843e+06	2.25583e+06	8.23996e+06	5.1746e+06	3.26714e+06	3.95232e+06	3.28042e+06	55.8	1.41971e+06	1.45105e+06	20.85	2.78	1.48	0.0018648	2.73	0.0275628	1.89867	250.144	750.9	12.5	Up
M251T109_2	1.60617e+06	750844	480473	2.11292e+06	1.20743e+06	954094	646488	525513	458054	429162	1.0773e+06	427322	112834	182614	128840	615857	428998	428242	74.07	1.03549e+06	852469	55.63	0.41	-1.27	0.00699301	2.16	0.0602244	1.56882	251.06	109.3	1.8	Down
M251T155	1.77544e+06	623643	2.15495e+06	1.65188e+06	2.05473e+06	1.69789e+06	1.6779e+06	1.64893e+06	2.15698e+06	2.6065e+06	2.58654e+06	2.10335e+06	1.96471e+06	3.01533e+06	2.00156e+06	2.97964e+06	2.42683e+06	2.37176e+06	17.63	1.66067e+06	1.6879e+06	27.78	1.46	0.55	0.0029526	2.53	0.0361958	1.53308	251.014	155.1	2.6	Up
M251T160	3.45684e+06	7.98737e+06	3.4969e+06	757574	8.24013e+06	3.47869e+06	1.03599e+07	5.97424e+06	1.21521e+07	1.14303e+07	1.74603e+07	1.7692e+07	1.17032e+07	9.94635e+06	9.80301e+06	1.12252e+07	1.26766e+07	1.15668e+07	24.7	5.46896e+06	4.73557e+06	58.76	2.32	1.21	0.000621601	3.21	0.0140919	1.70072	250.989	160.2	2.7	Up
M251T416	113326	840978	268453	93172	19891.7	37725.2	82662.5	54373	219562	471642	1.95938e+06	1.02658e+06	360524	467993	120775	1.03638e+06	707854	469817	85.98	188823	87917.2	145.34	3.75	1.91	0.00699301	2.16	0.0602244	1.55596	250.847	416.2	6.9	Up
M251T661	699505	383064	190334	371532	281346	311329	349725	585098	428549	407434	450505	671809	584081	607468	805858	651862	575946	595775	24.09	396492	360629	41.92	1.45	0.54	0.0281274	1.55	0.141969	1.39464	251.127	660.6	11	Up
M251T690	177438	216264	504240	192668	204744	392849	233928	158287	267034	224368	438575	264871	490562	271710	376764	990397	415535	324237	60.34	260052	210504	47.02	1.6	0.68	0.0498834	1.3	0.201689	1.13132	251.115	690.4	11.5	Up
M251T769	1.65283e+06	764399	145414	1.62967e+06	338048	1.15833e+06	415252	1.07261e+06	668471	2.22722e+06	2.62114e+06	2.91689e+06	2.31367e+06	1.37028e+06	2.64177e+06	1.96395e+06	2.09043e+06	2.27045e+06	35.68	897070	918505	64.37	2.33	1.22	0.00699301	2.16	0.0602244	1.53889	251.164	769.4	12.8	Up
M252T106_2	4.09853e+06	7.72336e+06	9.98753e+06	3.7523e+06	8.30982e+06	8.70606e+06	1.02766e+07	8.05715e+06	1.0352e+07	9.07653e+06	1.02213e+07	1.08499e+07	1.03596e+07	8.7694e+06	8.64794e+06	8.60806e+06	9.61059e+06	9.6489e+06	9.59	7.61391e+06	8.18348e+06	32.12	1.26	0.34	0.0281274	1.55	0.141969	1.21184	252.053	106.4	1.8	Up
M252T693_1	2.72669e+06	2.96833e+06	3.99368e+06	3.14505e+06	2.78594e+06	3.69881e+06	4.87033e+06	4.73917e+06	2.19591e+06	2.51375e+06	2.56651e+06	2.04337e+06	2.40741e+06	3.0802e+06	4.03986e+06	1.80126e+06	2.58103e+06	2.46058e+06	27.23	3.616e+06	3.42193e+06	23.62	0.71	-0.49	0.014763	1.83	0.0952789	1.46148	251.733	693.3	11.6	Down
M252T724	588757	588470	489449	309255	613610	1.02482e+06	1.04103e+06	1.09147e+06	1.49845e+06	1.76117e+06	1.61322e+06	2.1858e+06	669854	1.18708e+06	655420	974953	1.31824e+06	1.34276e+06	41.18	718357	601184	40.81	1.84	0.88	0.014763	1.83	0.0952789	1.49041	252.215	723.7	12.1	Up
M252T89	6.34593e+06	1.58672e+06	7.91597e+06	1.13473e+06	7.92292e+06	1.37323e+06	6.66954e+06	9.31e+06	1.31248e+07	1.98588e+07	7.73808e+06	1.14997e+06	1.11546e+07	2.71909e+07	2.25084e+07	1.2453e+07	1.43973e+07	1.27889e+07	58.41	5.28238e+06	6.50773e+06	63.73	2.73	1.45	0.0206682	1.68	0.117429	1.28323	252.107	89.4	1.5	Up
M253T368_2	1.09412e+06	1.11237e+06	1.47302e+06	1.25628e+06	1.53775e+06	808442	1.78961e+06	2.24454e+06	730646	374827	791737	574935	729267	1.02937e+06	381920	484113	637102	652101	35.41	1.41452e+06	1.36465e+06	32	0.45	-1.15	0.0003108	3.51	0.00894927	1.93683	253.1	368.1	6.1	Down
M253T413_1	4.36812e+06	1.53638e+07	9.09626e+06	7.65559e+06	6.00923e+06	8.01917e+06	7.13314e+06	5.60517e+06	7.2789e+06	3.90943e+06	3.99836e+06	3.12215e+06	3.10418e+06	1.49828e+06	3.22546e+06	3.10237e+06	3.65489e+06	3.1738e+06	45.13	7.90631e+06	7.39436e+06	42.52	0.46	-1.11	0.0018648	2.73	0.0275628	1.82868	252.677	412.8	6.9	Down
M253T413_3	1.49289e+06	817590	718286	1.91793e+06	827795	1.1137e+06	724463	1.56834e+06	1.58344e+06	2.70558e+06	3.92719e+06	1.23384e+06	2.0657e+06	1.31767e+06	1.79057e+06	1.30376e+06	1.99097e+06	1.68701e+06	46.39	1.14762e+06	970748	39.87	1.73	0.79	0.0281274	1.55	0.141969	1.49748	253.179	412.8	6.9	Up
M253T422	286037	1.3139e+06	388151	1.38411e+06	1.07689e+06	169043	897705	877804	1.82296e+06	1.06096e+06	3.34937e+06	601383	1.49245e+06	1.49423e+06	2.67542e+06	2.18607e+06	1.83535e+06	1.65859e+06	48.2	799205	887754	58.49	2.3	1.2	0.0104118	1.98	0.0771942	1.48779	253.164	421.7	7	Up
M253T451	1.30783e+06	272438	704452	544318	107047	15881.4	1.12916e+06	1.33928e+06	2.66285e+06	1.34917e+06	1.25334e+06	2.05423e+06	3.3854e+06	1.53121e+06	435593	3.37853e+06	2.00629e+06	1.79272e+06	52.98	677551	624385	78.59	2.96	1.57	0.00699301	2.16	0.0602244	1.39047	253.118	451.4	7.5	Up
M253T59	1.07636e+07	1.03523e+07	9.47477e+06	1.20299e+07	9.5868e+06	9.13098e+06	9.81356e+06	1.04437e+07	7.25553e+06	9.11466e+06	6.26194e+06	6.48965e+06	7.71813e+06	7.44247e+06	7.13966e+06	6.43936e+06	7.23268e+06	7.1976e+06	12.75	1.01995e+07	1.00829e+07	9.03	0.71	-0.5	0.0001554	3.81	0.00610078	2.1685	252.893	58.7	1	Down
M253T76	381313	288103	419288	309022	300129	284598	323026	351383	423641	358234	533157	476547	476528	400990	327035	394030	423770	412316	16.1	332108	316024	14.5	1.28	0.35	0.00699301	2.16	0.0602244	1.621	253.049	76.3	1.3	Up
M254T108	1.00717e+07	8.14805e+06	1.72812e+07	4.68169e+06	1.51554e+07	1.79889e+07	1.90177e+07	9.13352e+06	6.60966e+06	6.73544e+06	801125	1.44767e+07	8.729e+06	1.47535e+07	5.40613e+06	1.99407e+06	7.4382e+06	6.67255e+06	68.87	1.26848e+07	1.26135e+07	42.09	0.59	-0.77	0.0498834	1.3	0.201689	1.15127	254.49	107.7	1.8	Down
M254T117	992641	579533	662341	1.26687e+06	1.08407e+06	751048	474819	600286	3.11657e+06	5.25182e+06	2.32384e+06	2.26083e+06	2.00678e+06	5.1879e+06	6.19446e+06	6.59379e+06	4.117e+06	4.15223e+06	45.9	801450	706694	35.02	5.14	2.36	0.0001554	3.81	0.00610078	2.22913	254.149	117.2	2	Up
M254T377	83555.3	111399	105530	281153	111507	99721.2	109356	137405	561336	888795	209224	398057	990610	742143	1.09339e+06	679774	695416	710959	43.08	129953	110377	48.4	5.35	2.42	0.0003108	3.51	0.00894927	2.1921	254.014	376.9	6.3	Up
M254T390	144369	221940	199858	120115	7035.99	5249.67	17608.9	165235	986823	172484	1.01113e+06	45241.4	621227	183089	485051	452153	494650	468602	73.68	110177	132242	80.49	4.49	2.17	0.014763	1.83	0.0952789	1.45067	253.64	389.7	6.5	Up
M254T425	284354	1.36212e+06	1.82541e+06	766525	1.29682e+06	950180	1.59773e+06	1.57712e+06	1.57847e+06	3.36999e+06	2.38246e+06	840805	1.40041e+06	1.81329e+06	2.0915e+06	2.72792e+06	2.02561e+06	1.95239e+06	39.46	1.20753e+06	1.32947e+06	42.17	1.68	0.75	0.0379176	1.42	0.171246	1.26582	254.103	425.1	7.1	Up
M254T473	372513	74795.5	363589	255974	181255	94946.5	302168	390629	234075	191890	117739	81018.5	115724	80516.8	68394.3	70133.5	119936	98371.1	51.24	254484	279071	49.2	0.47	-1.09	0.0379176	1.42	0.171246	1.36	254.121	472.9	7.9	Down
M254T582	20926.1	46181.8	22535	276203	18344.2	20358	17102.8	12589.5	259438	846939	133220	39866.2	53505.9	809973	1.02173e+06	81020.6	405711	196329	101.91	54280.1	20642.1	166.24	7.47	2.9	0.004662	2.33	0.0475536	1.6693	254.058	581.8	9.7	Up
M254T605	808854	2.82155e+06	53006	27036.6	29106.9	76664.1	3.89415e+06	92405.6	5.9143e+06	2.0951e+07	2.6401e+06	1.47919e+06	1.79445e+06	2.37998e+06	1.31977e+07	1.32296e+07	7.69829e+06	4.2772e+06	94.06	975347	84534.8	155.92	7.89	2.98	0.0104118	1.98	0.0771942	1.78572	254.185	605	10.1	Up
M254T719	162300	274183	322844	157118	141532	220815	311436	193160	419469	430335	287976	382477	447343	298941	278807	373076	364803	377776	18.57	222924	206988	32.15	1.64	0.71	0.004662	2.33	0.0475536	1.76848	254.138	719	12	Up
M254T721	301937	296578	232865	278007	114428	24712.1	146067	199599	360262	342452	226527	340976	455099	324317	235493	208547	311709	332647	26.73	199274	216232	49.4	1.56	0.65	0.0281274	1.55	0.141969	1.13672	254.223	720.8	12	Up
M255T121	2.84002e+06	4.04243e+06	5.14628e+06	1.53443e+06	4.98347e+06	4.44105e+06	6.17495e+06	5.20322e+06	6.53421e+06	1.5217e+07	1.12288e+07	5.57136e+06	4.82088e+06	5.33858e+06	6.30121e+06	7.38825e+06	7.80004e+06	6.41771e+06	46.15	4.29573e+06	4.71226e+06	34.51	1.82	0.86	0.004662	2.33	0.0475536	1.53324	255.127	120.8	2	Up
M255T309	2.3461e+06	1.96477e+06	2.33016e+06	1.61654e+06	1.21409e+06	1.49182e+06	2.09674e+06	1.29269e+06	923295	635332	1.99807e+06	999217	1.306e+06	1.21228e+06	934707	1.91642e+06	1.24066e+06	1105747	39.19	1.79411e+06	1.79065e+06	25.14	0.69	-0.53	0.0281274	1.55	0.141969	1.3988	254.983	308.7	5.1	Down
M255T588	347564	394628	333409	394755	354344	184064	387461	326411	244246	227942	275652	229954	294583	352005	291630	201266	264660	259949	18.27	340329	350954	20.19	0.78	-0.36	0.0281274	1.55	0.141969	1.28372	255.206	588.2	9.8	Down
M255T90	1.69e+06	2.46449e+06	1.78528e+06	1.97608e+06	2.26677e+06	1.45362e+06	2.06161e+06	1.86041e+06	2.45793e+06	6.00237e+06	2.93267e+06	4.44782e+06	2.7313e+06	2.93645e+06	3.75723e+06	3.95635e+06	3.65276e+06	3.34684e+06	32	1.94478e+06	1.91824e+06	16.57	1.88	0.91	0.0003108	3.51	0.00894927	1.98667	255.064	90.4	1.5	Up
M256T114_1	9.9617e+06	1.8393e+07	1.2332e+07	2.66831e+07	9.35643e+06	1.24408e+07	1.03846e+07	1.79056e+07	4.94193e+06	1.64254e+06	1.68284e+06	1.38922e+06	3.81874e+06	4.45422e+06	4.09044e+06	4.05785e+06	3.25972e+06	3.93829e+06	44.15	1.46822e+07	1.23864e+07	40.53	0.22	-2.17	0.0001554	3.81	0.00610078	2.19808	256.065	113.9	1.9	Down
M256T115	5.40723e+06	3.64696e+06	5.23838e+06	6.52259e+06	3.043e+06	2.7239e+06	4.25174e+06	8.9286e+06	6.74207e+06	4.78642e+06	7.17448e+06	7.03253e+06	9.45903e+06	9.80369e+06	6.85082e+06	8.07337e+06	7.4903e+06	7.1035e+06	21.5	4.9703e+06	4.74506e+06	41.21	1.51	0.59	0.014763	1.83	0.0952789	1.51587	255.993	114.7	1.9	Up
M256T394	317950	168015	141907	519108	358002	360073	408854	338680	421435	573091	530205	352455	441659	362383	526239	513783	465156	477721	17.75	326574	348341	37.58	1.42	0.51	0.014763	1.83	0.0952789	1.3991	256.1	394.3	6.6	Up
M256T72_1	8.99338e+06	8.19386e+06	9.47661e+06	8.05079e+06	8.50314e+06	8.4023e+06	9.59884e+06	8.8914e+06	7.85425e+06	8.17531e+06	7.85377e+06	8.51394e+06	8.10726e+06	8.4728e+06	8.12886e+06	7.42923e+06	8.06693e+06	8.11806e+06	4.39	8.76379e+06	8.69727e+06	6.55	0.92	-0.12	0.0206682	1.68	0.117429	1.51905	255.938	71.6	1.2	Down
M256T72_2	3.09389e+06	3.03854e+06	2.49315e+06	2.84899e+06	3.24389e+06	2.80104e+06	3.41912e+06	2.7934e+06	3.41772e+06	3.34058e+06	3.28178e+06	4.92252e+06	3.31219e+06	3.26621e+06	3.91142e+06	3.84478e+06	3.66215e+06	3.37915e+06	15.55	2.9665e+06	2.94376e+06	9.86	1.23	0.3	0.0029526	2.53	0.0361958	1.64615	256.015	71.7	1.2	Up
M256T721	668049	410470	400197	375769	198854	67000	503963	422119	793017	1.40759e+06	457632	706586	786931	375476	473662	1.75264e+06	844193	746758	57.93	380803	405334	47.83	2.22	1.15	0.0206682	1.68	0.117429	1.39128	256.145	721.2	12	Up
M257T295	7648.4	209800	83076.4	47870.6	177975	139915	183051	91820.4	26775.3	10096.8	15346.4	27253.1	63855.5	55555	67589	16376	35355.9	27014.2	65.87	117645	115868	60.73	0.3	-1.73	0.0281274	1.55	0.141969	1.32041	257.069	295.2	4.9	Down
M257T389_1	2.4777e+07	1.00282e+07	3.03854e+06	2.21086e+07	7.46866e+06	6.66144e+06	1.79743e+07	6.641e+06	2.70684e+07	3.31652e+07	5.68213e+07	2.57738e+07	3.87751e+07	3.30504e+07	5.07745e+07	2.82357e+07	3.6708e+07	3.31078e+07	31.18	1.23372e+07	8.74841e+06	65.86	2.98	1.57	0.0001554	3.81	0.00610078	1.91847	256.849	389.1	6.5	Up
M257T460	2242.29	1375.89	3397.38	3366.26	3491.53	11070.1	16055.8	3026.96	26047.5	143714	34317.3	14462.7	26439.6	43615.5	76095.2	38001.2	50336.7	36159.2	83.22	5503.28	3381.82	94.47	9.15	3.19	0.0003108	3.51	0.00894927	2.13599	257.149	460.3	7.7	Up
M257T699	1.47967e+06	963418	2.21814e+06	1.45536e+06	1.86261e+06	609897	492157	1.72897e+06	1.735e+06	390904	436053	1.27893e+06	373466	328189	307732	295095	643170	382185	85.33	1.35128e+06	1.46751e+06	45.28	0.48	-1.07	0.014763	1.83	0.0952789	1.49872	257.157	699.5	11.7	Down
M257T72_1	1.13563e+06	1.00626e+06	1.35963e+06	963918	1.0309e+06	933281	1.24005e+06	1.52873e+06	1.61171e+06	1.85927e+06	1.66437e+06	1.66315e+06	1.09677e+06	1.76964e+06	1.53226e+06	1.80902e+06	1.62577e+06	1.66376e+06	14.71	1.1498e+06	1.08327e+06	18.37	1.41	0.5	0.0018648	2.73	0.0275628	1.85595	256.939	71.6	1.2	Up
M257T72_2	477829	341472	260954	698468	208158	514362	590968	699291	1.12148e+06	1.7724e+06	205113	943458	813892	1.34697e+06	1.00383e+06	906565	1.01421e+06	973644	44.23	473938	496096	39.88	2.14	1.1	0.0104118	1.98	0.0771942	1.38486	257.016	71.8	1.2	Up
M258T122	814878	1.88464e+07	1.14973e+07	5.92567e+06	1.61999e+07	9.59663e+06	1.97432e+07	1.21382e+07	3.1741e+07	4.49208e+07	4.37618e+07	2.69065e+07	2.98816e+07	5.27924e+06	2.75257e+07	2.61699e+07	2.95233e+07	2.87037e+07	41.58	1.18453e+07	1.18177e+07	54.56	2.49	1.32	0.00699301	2.16	0.0602244	1.36379	258.108	121.6	2	Up
M258T343	376564	402350	508893	506578	510670	391182	502834	462990	492133	659914	783217	595530	643655	633651	617247	714566	642489	638653	13.26	457758	482912	12.78	1.4	0.49	0.0018648	2.73	0.0275628	2.02562	258.062	342.6	5.7	Up
M258T357	223832	1.00997e+06	269531	245495	1.04643e+06	659223	1.44023e+06	1.14049e+06	3.5878e+06	5.19421e+06	1.27259e+06	1.68575e+06	1.59591e+06	6.86752e+06	6.4514e+06	3.72e+06	3.7969e+06	3.6539e+06	58.17	754400	834597	62.47	5.03	2.33	0.0003108	3.51	0.00894927	1.95255	258.074	356.5	5.9	Up
M258T367	46455.2	85113.9	108927	49527.2	190152	78062.9	150787	59124.8	190998	136359	237663	188490	199135	187547	170936	176580	185964	188019	15.28	96018.9	81588.4	53.46	1.94	0.95	0.004662	2.33	0.0475536	1.84384	258.097	367	6.1	Up
M258T376	30300	282966	32308.7	338060	193899	258529	277040	255762	446799	613634	648967	96797.1	340093	362816	507533	371684	423540	409242	41.34	208608	257146	55.78	2.03	1.02	0.004662	2.33	0.0475536	1.25617	258.098	375.8	6.3	Up
M258T483	1.31318e+06	1.6493e+06	1.97473e+06	1.0175e+06	1.74102e+06	1.01644e+06	1.70367e+06	2.30354e+06	3.60805e+06	4.87049e+06	5.20041e+06	3.97128e+06	5.29789e+06	3.13896e+06	4.41731e+06	2.60507e+06	4.13868e+06	4.19429e+06	23.72	1.58992e+06	1.67648e+06	28.43	2.6	1.38	0.0001554	3.81	0.00610078	2.2223	258.098	482.8	8	Up
M258T569	1.36218e+06	372133	607790	973694	1.45567e+06	188477	959868	160952	1.58863e+06	6.03536e+06	2.2808e+06	1.19689e+06	1.08798e+06	323794	2.38759e+06	2.15932e+06	2.13254e+06	1.87397e+06	80.94	760095	783829	66.55	2.81	1.49	0.0206682	1.68	0.117429	1.34698	258.17	568.5	9.5	Up
M258T72_2	1.12245e+07	7.45632e+06	1.29413e+07	1.31267e+07	1.3914e+07	9.3781e+06	1.62508e+06	1.23282e+07	1.35787e+07	1.5053e+07	2.01252e+07	1.99855e+07	7.9824e+06	1.3503e+07	1.35844e+07	1.3457e+07	1.46587e+07	1.35816e+07	26.81	1.02493e+07	1.17764e+07	39.92	1.43	0.52	0.0206682	1.68	0.117429	1.07265	257.977	72.1	1.2	Up
M258T84	2.65934e+06	2.9067e+06	2.92129e+06	2.6443e+06	2.62583e+06	2.52379e+06	3.41958e+06	3.35304e+06	2.25232e+06	1.87061e+06	2.50667e+06	2.83895e+06	2.71794e+06	1.69971e+06	1.56597e+06	2.117e+06	2.19615e+06	2.18466e+06	21.36	2.88173e+06	2.78302e+06	11.83	0.76	-0.39	0.0104118	1.98	0.0771942	1.649	258.075	84.4	1.4	Down
M259T122_1	2.8088e+07	1.04292e+07	2.13155e+07	1.93618e+07	5.73104e+07	2.77695e+07	6.30203e+07	4.07473e+07	6.1455e+07	6.06486e+07	9.72515e+07	6.06726e+07	5.06152e+07	4.41948e+07	5.5052e+07	6.07729e+07	6.13328e+07	6.06606e+07	25.7	3.35052e+07	2.79287e+07	55.65	1.83	0.87	0.0206682	1.68	0.117429	1.6849	259.093	121.7	2	Up
M259T122_2	2.21315e+06	1.1518e+06	1.58556e+06	2.15693e+06	5.96614e+06	2.12824e+06	6.40678e+06	3.46561e+06	8.74186e+06	7.68003e+06	1.13206e+07	7.46054e+06	6.83759e+06	7.49883e+06	6.31956e+06	6.65401e+06	7.81412e+06	7.47969e+06	20.48	3.13428e+06	2.18504e+06	63.79	2.49	1.32	0.0003108	3.51	0.00894927	1.99428	259.105	121.7	2	Up
M259T371	40037.1	270067	146344	49069.7	48159.7	18594.5	143143	44258.8	484238	40766.5	344361	57027.6	237259	77847.5	274137	296411	226506	255698	69.39	94959.3	48614.7	90.19	2.39	1.25	0.0498834	1.3	0.201689	1.13161	259.042	371.2	6.2	Up
M259T546	288619	332398	453329	232014	445801	272352	214264	427567	85310.7	47892.6	78670.6	227457	54152.3	394522	422223	21167.8	166424	81990.6	97.21	333293	310509	29.15	0.5	-1	0.0281274	1.55	0.141969	1.4902	259.107	545.8	9.1	Down
M259T72_2	1.95637e+06	1.87478e+06	1.89489e+06	1.82681e+06	1.69761e+06	1.51898e+06	2.26103e+06	1.99567e+06	3.24749e+06	3.06202e+06	2.43527e+06	2.62412e+06	2.76912e+06	2.66421e+06	2.05409e+06	2.7085e+06	2.6956e+06	2.68635e+06	13.52	1.87827e+06	1.88483e+06	11.58	1.44	0.52	0.0003108	3.51	0.00894927	2.04637	258.978	71.7	1.2	Up
M259T87	7.46205e+06	7.90762e+06	8.15305e+06	7.79205e+06	7.27205e+06	7.1276e+06	7.25107e+06	6.84614e+06	9.85916e+06	1.53585e+07	9.55959e+06	7.4856e+06	8.76807e+06	1.0234e+07	1.15552e+07	1.29559e+07	1.0722e+07	1.00466e+07	23.33	7.47645e+06	7.36705e+06	5.88	1.43	0.52	0.0010878	2.96	0.0203124	1.83541	259.114	86.5	1.4	Up
M260T107	1.60997e+06	1.61232e+06	2.01018e+06	2.12509e+06	2.43237e+06	2.73521e+06	1.97717e+06	2.16452e+06	945925	148542	159441	225344	190918	154149	132584	297894	281850	175180	97.08	2.08335e+06	2.06763e+06	18.3	0.14	-2.89	0.0001554	3.81	0.00610078	2.32187	260.112	106.8	1.8	Down
M260T359	2.32232e+07	3.02731e+06	3.09347e+07	760406	3.67982e+07	2.40946e+07	2.97647e+07	3.55131e+07	1.70877e+07	1.53238e+06	474743	886712	500840	1.73976e+07	749636	1.58274e+06	5.02655e+06	1.20955e+06	150.24	2.30145e+07	2.69296e+07	60.35	0.22	-2.19	0.00699301	2.16	0.0602244	1.47806	260.15	359	6	Down
M260T360	574562	503419	542630	473051	652659	500219	647020	539046	730989	738221	739915	735030	627916	736213	715540	916977	742600	735622	10.74	554076	540838	12.04	1.34	0.42	0.000621601	3.21	0.0140919	2.04921	260.162	359.8	6	Up
M260T373_1	2.65845e+07	1.07339e+07	2.78353e+07	7.61599e+06	3.02845e+07	1.84308e+07	3.79888e+07	2.01014e+07	1.04672e+07	4.98818e+06	3.88849e+06	1.3449e+07	1.59974e+07	2.59316e+07	4.42095e+06	1.34701e+07	1.15766e+07	1.19581e+07	64.28	2.24469e+07	2.33429e+07	45.43	0.52	-0.96	0.0281274	1.55	0.141969	1.33646	260.149	373.3	6.2	Down
M260T519	2.8544e+07	9.65146e+06	5.58535e+07	2.73551e+07	4.31885e+07	3.74854e+07	1.53368e+07	1.07434e+07	2.18253e+07	4.72272e+06	1.09749e+07	1.84415e+07	1.7946e+07	1.39078e+07	8.7478e+06	2.53586e+06	1.23877e+07	1.24414e+07	55.42	2.85198e+07	2.79495e+07	57.61	0.43	-1.2	0.0498834	1.3	0.201689	1.36204	260.185	519.2	8.7	Down
M260T569	70653.9	50738.6	59682.4	32010.3	90140.6	114143	48674	51903.2	23650	13692	15732.9	27768.1	18229.8	95403.7	25545.2	12395.3	29052.1	20939.9	94.3	64743.3	55792.8	40.6	0.45	-1.16	0.00699301	2.16	0.0602244	1.71607	260.149	569.1	9.5	Down
M260T72_1	380666	1.61815e+06	1.36782e+06	455403	1.48149e+06	438144	339351	1.26988e+06	3.05505e+06	2.78417e+06	2.7825e+06	2.97015e+06	2.99599e+06	2.12179e+06	2.12228e+06	3.29787e+06	2.76622e+06	2.87716e+06	15.52	918863	862641	61.04	3.01	1.59	0.0001554	3.81	0.00610078	2.02032	259.974	71.9	1.2	Up
M260T99_1	3.44042e+06	4.44767e+06	2.94784e+06	4.48645e+06	2.6285e+06	3.40488e+06	2.82006e+06	2.79359e+06	3.85427e+06	3.62747e+06	4.26215e+06	2.9169e+06	3.64351e+06	7.4893e+06	6.01827e+06	6.79864e+06	4.82631e+06	4.05821e+06	35.15	3.37118e+06	3.17636e+06	21.79	1.43	0.52	0.0498834	1.3	0.201689	1.27425	260.135	99.2	1.7	Up
M260T99_2	219904	190511	255136	228388	245165	204316	214328	193067	372697	966427	433504	341095	281047	653786	632832	871407	569099	533168	44.67	218852	217116	10.65	2.6	1.38	0.0001554	3.81	0.00610078	2.04	260.171	98.7	1.6	Up
M261T123	2.23617e+07	2.25903e+07	2.37956e+07	2.03951e+07	1.71522e+07	1.91196e+07	2.16984e+07	2.53055e+07	3.12932e+07	2.88167e+07	2.3701e+07	2.19408e+07	3.48e+07	2.54524e+07	2.78028e+07	2.76409e+07	2.7681e+07	2.77218e+07	14.88	2.15523e+07	2.20301e+07	12.09	1.28	0.36	0.004662	2.33	0.0475536	1.7233	261.145	123.2	2.1	Up
M261T321_1	32347.8	33199.9	58535.8	42757.6	96246.2	61594.5	31336.3	33948.8	2.31131e+06	4.89121e+06	3.83308e+06	40156.8	2.07091e+06	846655	4.92148e+06	2.94516e+06	2.7325e+06	2.62823e+06	65.07	48745.8	38353.2	46.43	56.06	5.81	0.0018648	2.73	0.0275628	2.14622	260.58	320.8	5.3	Up
M261T593	490316	1.93109e+06	2.23977e+06	1.53417e+06	4.36506e+06	7.72596e+06	1.80254e+06	1.43012e+06	427866	579066	490179	619689	734978	2.34521e+06	1.72504e+06	411391	916678	599377	78.29	2.68988e+06	1.86682e+06	86.04	0.34	-1.55	0.0379176	1.42	0.171246	1.44339	261.217	592.6	9.9	Down
M261T798	965262	533297	829998	1.10665e+06	798766	809014	501856	1.13392e+06	1.02765e+06	1.45654e+06	1.82467e+06	918401	1.16673e+06	1.12663e+06	1.04836e+06	1.24929e+06	1.22728e+06	1.14668e+06	23.68	834846	819506	28.06	1.47	0.56	0.0104118	1.98	0.0771942	1.61711	261.181	798.2	13.3	Up
M261T81	1.02454e+08	8.51737e+07	1.03559e+08	1.33992e+08	8.80765e+07	7.58924e+07	1.38044e+08	1.10739e+08	1.40023e+08	8.77394e+06	8.54008e+07	7.98449e+07	7.43442e+07	1.55914e+07	1.3926e+07	1.82644e+07	5.45211e+07	4.63043e+07	87.33	1.04741e+08	1.03006e+08	21.35	0.52	-0.94	0.0281274	1.55	0.141969	1.50645	260.898	80.5	1.3	Down
M262T335	9.61306e+06	1.14425e+07	8.34164e+06	1.06592e+07	5.59036e+06	1.16246e+07	5.67753e+06	8.23767e+06	5.79291e+06	580824	6.05293e+06	7.21149e+06	5.93694e+06	5.2014e+06	6.28392e+06	5.88798e+06	5.36855e+06	5.91246e+06	37.54	8.89833e+06	8.97735e+06	26.72	0.6	-0.73	0.0379176	1.42	0.171246	1.23128	262.165	334.9	5.6	Down
M262T363	4.00299e+06	2.22829e+06	4.82158e+06	146209	5.8139e+06	2.68264e+06	5.49192e+06	3.32462e+06	1.83772e+06	1.64172e+06	184940	1.46119e+06	1.44386e+06	1.66242e+06	643647	1.2851e+06	1.27007e+06	1.45252e+06	44.65	3.56402e+06	3.66381e+06	52.87	0.36	-1.49	0.0104118	1.98	0.0771942	1.02994	262.128	363	6	Down
M262T409	811408	1.31857e+06	1.31643e+06	2.74372e+06	864868	918774	1.01188e+06	1.39243e+06	862980	802467	1.15214e+06	998420	874364	402556	561208	439044	761648	832723	35.31	1.29726e+06	1.16416e+06	48.31	0.59	-0.77	0.0206682	1.68	0.117429	1.45478	262.119	408.6	6.8	Down
M262T419_2	1.00993e+06	445551	943768	69648.4	968406	592496	927652	487185	301494	330297	18968.5	291465	342013	271067	51915	299898	238390	295682	53.47	680580	760074	49.53	0.35	-1.51	0.004662	2.33	0.0475536	1.31398	261.857	419.3	7	Down
M262T573	1.26367e+06	1.13774e+06	1.12448e+06	935701	444516	148571	1.21243e+06	1.32703e+06	1.35554e+06	2.17234e+06	1.63664e+06	1.77872e+06	1.90328e+06	1.12312e+06	1.21936e+06	1.90999e+06	1637374	1.70768e+06	22.73	949268	1.13111e+06	44.93	1.72	0.79	0.00699301	2.16	0.0602244	1.35082	262.18	572.6	9.5	Up
M262T753	1.05958e+06	807038	2.052e+06	1.19759e+06	996044	1.04418e+06	1.20088e+06	846472	745392	430815	647969	592037	604365	1.18786e+06	589386	1.12706e+06	740610	626167	36.71	1.15047e+06	1.05188e+06	34	0.64	-0.64	0.0206682	1.68	0.117429	1.53127	262.178	752.8	12.5	Down
M262T80	148972	103543	1.01868e+06	207232	155379	104932	130365	233067	1.71281e+06	2.50916e+06	1.71399e+06	1.31875e+06	2.40862e+06	2.60399e+06	1.82698e+06	2.09745e+06	2.02397e+06	1.96222e+06	22.52	262772	152176	117.53	7.7	2.95	0.0001554	3.81	0.00610078	2.28783	261.901	80.4	1.3	Up
M262T91	2.93454e+06	6.08554e+06	7.68431e+06	3.35714e+06	5.83605e+06	5.80308e+06	8.08032e+06	1.19595e+07	1.36573e+07	1.4308e+07	1.55641e+07	1.87676e+07	1.33596e+07	9.78434e+06	9.19067e+06	1.18875e+07	1.33149e+07	1.35084e+07	23.31	6.46756e+06	5.9608e+06	44.27	2.06	1.04	0.0010878	2.96	0.0203124	1.90637	262.103	91	1.5	Up
M263T121	4.47681e+06	2.40977e+06	3.09612e+06	3.00623e+06	8.55349e+06	3.73296e+06	8.88587e+06	5.6965e+06	1.08163e+07	6.81881e+06	1.47991e+07	1.00092e+07	8.28014e+06	8.14688e+06	8.55204e+06	8.60106e+06	9.50295e+06	8.57655e+06	25.86	4.98222e+06	4.10489e+06	50.55	1.91	0.93	0.014763	1.83	0.0952789	1.82203	263.069	121.3	2	Up
M263T122	5.82873e+06	2.00518e+07	1.53975e+07	8.93514e+06	1.57303e+07	7.37398e+06	1.62846e+07	2.15436e+07	3.4877e+07	1.98086e+07	4.01753e+07	2.98118e+07	3.21471e+07	1.4063e+07	1.08205e+07	3.45096e+07	2.70266e+07	3.09795e+07	39.73	1.38932e+07	1.55639e+07	42.14	1.95	0.96	0.0379176	1.42	0.171246	1.48092	263.132	121.8	2	Up
M263T328	167534	38572.8	442407	181339	198918	207486	632522	536677	1.38993e+06	1.19546e+06	338442	327648	1.4253e+06	1.22169e+06	1.00225e+06	361007	907717	1.09886e+06	53.49	300682	203202	69.49	3.02	1.59	0.014763	1.83	0.0952789	1.61873	263.069	327.5	5.5	Up
M263T423	281512	181492	356613	267250	248565	39339.3	355951	375293	337142	390967	284723	453070	399113	397117	266232	391518	364985	391243	17.42	263252	274381	42.41	1.39	0.47	0.0281274	1.55	0.141969	1.05526	263.106	423.3	7.1	Up
M263T437	1.2287e+06	458335	670887	467928	23972.1	541899	278603	913859	562387	652771	1.42449e+06	1.09999e+06	1.61725e+06	1.08582e+06	734845	866125	1.00546e+06	975973	37.19	573023	504913	64.93	1.75	0.81	0.0379176	1.42	0.171246	1.12582	263.138	437.1	7.3	Up
M263T444	1510.12	3365.49	23220.5	34814.8	24240.5	2991.02	13546.8	148309	91828.8	137803	45376.5	80380.2	284430	321702	545996	206401	214240	172102	77.68	31499.8	18383.7	154.61	6.8	2.77	0.0018648	2.73	0.0275628	1.89349	263.122	444.4	7.4	Up
M263T72	3.66345e+06	3.70032e+06	3.77878e+06	3.84486e+06	3.9523e+06	3.29399e+06	4.16119e+06	4.13565e+06	4.56398e+06	3.68315e+06	4.13677e+06	4.05657e+06	4.34285e+06	5.20224e+06	4.49113e+06	4.75553e+06	4.40403e+06	4.41699e+06	10.54	3.81632e+06	3.81182e+06	7.35	1.15	0.21	0.014763	1.83	0.0952789	1.58653	262.95	71.8	1.2	Up
M264T103	1.72587e+06	1.80137e+06	2.15826e+06	1.87513e+06	3.19026e+06	1.29215e+06	2.5954e+06	2.82002e+06	467628	1.18404e+06	579704	640924	445222	814548	484786	1.74886e+06	795714	610314	57.34	2.18231e+06	2.0167e+06	29.16	0.36	-1.46	0.000621601	3.21	0.0140919	2.02923	264.09	102.9	1.7	Down
M264T118	3.25404e+06	3.42058e+06	4.96761e+06	4.80156e+06	4.86201e+06	4.72971e+06	5.40871e+06	243668	6.49968e+06	8.10972e+06	7.68072e+06	7.06767e+06	6.83258e+06	4.52116e+06	5.81344e+06	6.8172e+06	6.66777e+06	6.82489e+06	16.7	3.96099e+06	4.76563e+06	42.49	1.68	0.75	0.0029526	2.53	0.0361958	1.13252	264.108	118.3	2	Up
M264T613	102603	397704	379034	215580	1.21909e+06	2.817e+06	379856	386194	72425.3	52592.8	81783.7	142415	78535.6	470531	309101	44482.3	156483	80159.7	97.87	737133	383025	122.71	0.21	-2.24	0.014763	1.83	0.0952789	1.53106	264.086	612.7	10.2	Down
M264T94	9.34763e+07	8.85237e+07	6.26462e+07	1.13793e+08	8.80376e+07	5.96467e+07	7.97376e+07	9.84955e+07	1.20257e+08	1.46059e+08	1.26023e+08	1.04431e+08	8.93814e+07	1.30785e+08	1.16746e+08	1.14686e+08	1.18546e+08	1.18502e+08	14.38	8.55446e+07	8.82806e+07	21.06	1.39	0.47	0.0018648	2.73	0.0275628	1.72784	264.15	94.4	1.6	Up
M264T99_2	1.36047e+06	1.404e+06	1.47125e+06	1.55755e+06	1.2822e+06	1.52894e+06	1.36216e+06	1.34604e+06	1.08986e+06	925913	1.31869e+06	1.0818e+06	962910	1.34154e+06	1.16672e+06	1.31415e+06	1.1502e+06	1.12829e+06	14.17	1.41408e+06	1.38308e+06	6.8	0.81	-0.3	0.0010878	2.96	0.0203124	1.78515	264.118	99.5	1.7	Down
M265T441	2851.87	11071.7	5988.63	99012.8	107990	7408.95	11329.9	11302.1	277038	639140	556925	24258.1	267566	92916.3	313374	403861	321885	295206	65.24	32119.5	11186.9	137.68	10.02	3.33	0.0018648	2.73	0.0275628	1.95222	265.155	440.9	7.3	Up
M265T528	133924	620400	844253	330509	65641.8	114406	718371	90130.4	1.91647e+06	95135.8	1.17572e+06	1.61827e+06	760383	184929	1.03711e+06	687274	934411	898745	68.39	364704	232216	86.85	2.56	1.36	0.0498834	1.3	0.201689	1.08332	265.129	528.1	8.8	Up
M265T698	942432	799065	609982	365966	172335	278161	302699	318590	1.93866e+06	746578	1.40842e+06	345538	1.96455e+06	1.11414e+06	891506	1.80884e+06	1.27728e+06	1.26128e+06	47.11	473654	342278	58.54	2.7	1.43	0.00699301	2.16	0.0602244	1.64515	265.216	698.4	11.6	Up
M265T72_1	1.34459e+07	1.12382e+07	7.9844e+06	1.19067e+07	1.14645e+07	9.82855e+06	1.02288e+07	5.60721e+06	7.65854e+06	9.99252e+07	1.29549e+07	1.56895e+07	1.205e+07	1.11205e+08	1.17592e+08	1.22552e+08	6.24534e+07	5.78073e+07	86.89	1.0213e+07	1.07335e+07	24.06	6.12	2.61	0.014763	1.83	0.0952789	1.53049	264.947	71.7	1.2	Up
M265T86	8.95108e+06	5.84117e+06	7.91968e+06	9.15546e+06	5.29165e+06	1.22903e+07	5.2786e+06	5.41259e+06	2.65056e+07	3.76853e+07	3.46742e+07	2.3607e+07	2.95554e+07	2.70823e+07	2.44724e+07	3.30211e+07	2.95754e+07	2.83188e+07	17.19	7.51757e+06	6.88042e+06	33.69	3.93	1.98	0.0001554	3.81	0.00610078	2.35065	265.112	86.4	1.4	Up
M265T99	370092	361466	610252	826944	593142	559820	366979	551842	834703	2.11154e+06	1.33237e+06	640571	579084	729967	831698	541425	950170	780833	55.85	530067	555831	30.3	1.79	0.84	0.0206682	1.68	0.117429	1.47642	265.001	99.4	1.7	Up
M266T111	301385	359442	285839	352345	301095	265585	385638	266003	343012	428375	433440	350747	318675	341758	362031	391152	371149	356389	11.37	314667	301240	14.43	1.18	0.24	0.0498834	1.3	0.201689	1.39835	266.099	110.8	1.8	Up
M266T118	540211	1.09226e+06	914224	1.21483e+06	1.08792e+06	949248	1.34682e+06	1.39788e+06	1.69333e+06	2.84065e+06	3.04242e+06	1.96097e+06	2.10674e+06	1.66977e+06	1.69218e+06	2.25501e+06	2.15763e+06	2.03386e+06	24.59	1.06792e+06	1.09009e+06	25.65	2.02	1.01	0.0001554	3.81	0.00610078	2.04921	266.075	117.7	2	Up
M266T338	6.40811e+06	3.95044e+06	7.18048e+06	7.09804e+06	1.53722e+06	816174	6.90671e+06	9.12827e+06	1.089e+07	7.42354e+06	8.38949e+06	7.65537e+06	1.24707e+07	7.3244e+06	6.63644e+06	4.4323e+06	8.15279e+06	7.53946e+06	30.68	5.37818e+06	6.65741e+06	55.01	1.52	0.6	0.0498834	1.3	0.201689	1.10464	266.011	338.4	5.6	Up
M266T615	2.73243e+06	3.46793e+06	1.6721e+06	1.37602e+06	2.08901e+06	1.16308e+06	2.28731e+06	2.71938e+06	4.06867e+06	4.07874e+06	3.96187e+06	1.80027e+06	3.52562e+06	1.49112e+06	4.51495e+06	3.8775e+06	3.41484e+06	3.91968e+06	33.04	2.18841e+06	2.18816e+06	35.45	1.56	0.64	0.0281274	1.55	0.141969	1.27192	266.232	615.1	10.3	Up
M267T328	934881	387078	1.03897e+06	382399	1.18694e+06	825687	1.00604e+06	782764	357719	190303	164040	469046	537847	946090	178826	503317	418398	413382	62.61	818095	880284	36.1	0.51	-0.97	0.0281274	1.55	0.141969	1.49099	267.135	328.1	5.5	Down
M267T420	91419.5	148682	137751	174019	83545.1	97925.2	99474.8	127747	40869.5	27647.6	38882.6	40301.2	48829.4	44913.4	32842.2	30837	38140.3	39591.9	18.91	120070	113611	26.66	0.32	-1.65	0.0001554	3.81	0.00610078	2.344	267.206	420.2	7	Down
M267T454	355713	422069	193915	280394	455128	138936	352671	168489	1.03172e+06	707744	1.13989e+06	723476	1.63605e+06	922139	866115	894781	990239	908460	30.09	295914	316533	40.31	3.35	1.74	0.0001554	3.81	0.00610078	2.16679	266.952	454	7.6	Up
M267T642	630045	133743	348038	176517	91741	144377	215649	397791	459386	1.13534e+06	374269	476491	891611	299165	191339	1.14846e+06	622008	467938	61.13	267238	196083	67.8	2.33	1.22	0.0281274	1.55	0.141969	1.42997	267.206	642.3	10.7	Up
M267T91	551664	518843	1.01719e+06	1.49734e+06	1.90606e+06	955894	3.28581e+06	2.9757e+06	2.77812e+06	2.14181e+06	2.01098e+06	3.34878e+06	2.58138e+06	2.42423e+06	2.51101e+06	3.03337e+06	2.60371e+06	2.54619e+06	17.03	1.58856e+06	1.25727e+06	66.71	1.64	0.71	0.0498834	1.3	0.201689	1.49891	267.126	91.3	1.5	Up
M268T346_1	143849	143080	134153	165035	238347	123167	145097	122717	774729	656823	2.01852e+06	195435	810085	430529	381487	54981.9	665324	543676	91.48	151931	143464	24.66	4.38	2.13	0.014763	1.83	0.0952789	1.51542	267.596	345.5	5.8	Up
M268T346_2	534869	474455	582431	506146	566997	389312	558751	496088	661461	950071	665491	609092	718630	711732	836492	753622	738324	715181	14.81	513631	520508	12.19	1.44	0.52	0.0001554	3.81	0.00610078	2.04828	268.13	345.8	5.8	Up
M268T405	403317	539986	238918	638257	255396	224884	106125	216935	400683	1.19204e+06	680750	322619	377138	1.24253e+06	1.28726e+06	393721	737092	540716	58.48	327977	247157	55.54	2.25	1.17	0.0379176	1.42	0.171246	1.44482	267.637	404.8	6.7	Up
M268T414_1	3.08387e+06	3.96063e+06	2.68379e+06	3.33466e+06	4.26802e+06	2.39951e+06	1.9756e+06	2.19721e+06	1.59466e+06	1.35591e+07	1.26304e+07	4.27286e+06	3.99543e+06	1.18929e+07	6.54918e+06	5.70239e+06	7.52462e+06	6.12578e+06	60.28	2.98791e+06	2.88383e+06	27.72	2.52	1.33	0.014763	1.83	0.0952789	1.49043	267.784	414.3	6.9	Up
M268T63	3.64708e+06	6.17034e+06	2.60195e+06	2.84909e+06	628368	8.53296e+06	2.98627e+06	7.29474e+06	9.60538e+06	8.21991e+06	3.37704e+06	7.35319e+06	1.07699e+07	3.10924e+06	8.56144e+06	7.45378e+06	7.30623e+06	7.83685e+06	37.58	4.33885e+06	3.31668e+06	62.21	1.68	0.75	0.0281274	1.55	0.141969	1.1507	267.9	63.4	1.1	Up
M269T105	3.12257e+06	1.34047e+07	2.33172e+06	2.5294e+06	2.08509e+06	1.93269e+06	2.69319e+06	2.63879e+06	1.76843e+06	1.87307e+06	2.34989e+06	2.65381e+06	1.62404e+06	1.5061e+06	1.62629e+06	1.91751e+06	1.91489e+06	1.82075e+06	20.64	3.84226e+06	2.5841e+06	101.02	0.5	-1	0.0104118	1.98	0.0771942	1.26584	269.153	104.8	1.7	Down
M269T111	379892	388704	561679	321110	713109	649948	643799	498933	301366	43625.6	365249	373197	323108	458450	341934	46220.3	281644	332521	54.42	519647	530306	27.99	0.54	-0.88	0.00699301	2.16	0.0602244	1.32125	269.162	110.7	1.8	Down
M269T125	5.71996e+06	5.81695e+06	6.26914e+06	6.39899e+06	2.90016e+06	9.23777e+06	2.93036e+06	3.39286e+06	1.44515e+07	2.30711e+07	1.92697e+07	1.14396e+07	1.46064e+07	1.57148e+07	2.23947e+07	1.13529e+07	1.65376e+07	1.51606e+07	27.62	5.33327e+06	5.76845e+06	40.77	3.1	1.63	0.0001554	3.81	0.00610078	2.15287	269.107	125.1	2.1	Up
M269T137	41844.1	38080.5	40694.2	66377.2	46422	36051.7	69664.9	55501.9	2001.31	16646.3	9053.01	9315.15	8238.34	9844.44	23484.9	1673.71	10032.1	9184.08	71.86	49329.6	44133.1	26.37	0.2	-2.3	0.0001554	3.81	0.00610078	2.03091	268.997	136.8	2.3	Down
M269T148	5.99234e+08	5.84431e+08	4.33744e+08	5.72025e+08	5.22882e+08	7.0556e+08	9.5734e+08	5.65972e+08	6.26301e+08	1.30476e+09	7.74453e+08	6.84537e+08	9.18767e+08	1.20042e+09	9.24269e+08	1.28467e+09	9.64773e+08	9.21518e+08	27.88	6.17649e+08	5.78228e+08	25.39	1.56	0.64	0.00699301	2.16	0.0602244	1.66171	269.088	147.7	2.5	Up
M269T242	1.28313e+06	781552	2.24439e+06	891781	4.16362e+06	1.96322e+06	2.90169e+06	2.99957e+06	4.86516e+06	3.82362e+06	3.34483e+06	4.09494e+06	4.1541e+06	3.66853e+06	2.68828e+06	2.94768e+06	3.69839e+06	3.74607e+06	18.99	2.15362e+06	2.10381e+06	54.36	1.72	0.78	0.0206682	1.68	0.117429	1.6178	269.107	241.5	4	Up
M269T439	804456	423035	448154	1.44357e+06	825694	488569	811266	890880	1.28414e+06	2.04704e+06	1.24157e+06	1.5695e+06	871365	1.28115e+06	1.32144e+06	1.30965e+06	1.36573e+06	1.2969e+06	24.51	766953	807861	43.45	1.78	0.83	0.00699301	2.16	0.0602244	1.76288	269.216	439	7.3	Up
M269T679	1.10264e+06	780254	1.36888e+06	283237	1.54806e+06	159234	2.58635e+06	1.75462e+06	660354	291374	148151	747993	468213	247161	173320	393790	391294	342582	56.57	1.19791e+06	1.23576e+06	66.85	0.33	-1.61	0.0379176	1.42	0.171246	1.34897	269.174	679.2	11.3	Down
M269T686	290945	38436.4	128657	342230	108515	331457	202384	302490	333421	762062	325518	610256	602520	526205	376832	300879	479712	451518	35.39	218139	246665	52.9	2.2	1.14	0.004662	2.33	0.0475536	1.62733	269.139	686.5	11.4	Up
M270T505	283606	76896	1.14335e+06	69824.3	1.17149e+06	117896	818558	88620.6	3.79208e+06	3.3453e+06	3.00608e+06	2.52575e+06	4.00957e+06	3.20623e+06	3.37038e+06	4.26916e+06	3.44057e+06	3.35784e+06	16.4	471280	200751	104.13	7.3	2.87	0.0001554	3.81	0.00610078	2.11154	270.115	505.2	8.4	Up
M270T548	508708	270369	273871	396547	195556	174418	299373	451199	572749	507458	463638	660041	547804	429896	376238	224316	472767	485548	28.25	321255	286622	37.27	1.47	0.56	0.0498834	1.3	0.201689	1.28277	270.149	547.6	9.1	Up
M270T736	319937	1.5535e+06	516690	1.038e+06	698254	544939	709535	783311	538393	53119.1	389876	590846	459879	487097	414874	99433.1	379190	437377	52.2	770520	703894	49.35	0.49	-1.02	0.014763	1.83	0.0952789	1.35782	270.186	735.9	12.3	Down
M271T155	2.28654e+06	2.22789e+06	2.91371e+06	1.86875e+06	3.76043e+06	3.15098e+06	2.88889e+06	2.73833e+06	1.60137e+06	1.37599e+06	1.70746e+06	2.46138e+06	1.63029e+06	2.3458e+06	1.97324e+06	1.0806e+06	1.77202e+06	1.66887e+06	26.41	2.72944e+06	2.81361e+06	21.85	0.65	-0.62	0.00699301	2.16	0.0602244	1.68288	271.001	155.3	2.6	Down
M271T316	2.56177e+06	1.79135e+06	1.8376e+06	2.22626e+06	3.1842e+06	2.46841e+06	2.58847e+06	3.19652e+06	1.71903e+06	2.75809e+06	2.30647e+06	1.28548e+06	1.05771e+06	1.4894e+06	1.7201e+06	2.13902e+06	1.80941e+06	1.71956e+06	31.08	2.48182e+06	2.51509e+06	21.42	0.73	-0.46	0.0281274	1.55	0.141969	1.32215	271.14	316.1	5.3	Down
M271T372	243969	378225	570674	272177	497163	438959	417348	311126	261072	148565	331991	280526	267419	394147	241210	135073	257501	264246	33.47	391205	397787	28.8	0.66	-0.6	0.0281274	1.55	0.141969	1.4104	271.238	371.9	6.2	Down
M271T417	1.39278e+06	2.25069e+06	2.04871e+06	438274	1.0104e+06	2.03359e+06	4.05478e+06	1.07782e+06	4.00813e+06	2.25006e+06	3.61426e+06	4.08044e+06	1.75828e+06	2.35609e+06	2.31948e+06	2.87756e+06	2.90804e+06	2.61682e+06	30.45	1.78838e+06	1.71319e+06	61.86	1.63	0.7	0.0281274	1.55	0.141969	1.31865	271.178	416.5	6.9	Up
M271T512	1.28789e+06	1.06485e+06	1.02345e+06	1.52356e+06	1.32296e+06	1.0236e+06	1.55183e+06	1.44643e+06	1.66378e+06	2.21045e+06	1.46948e+06	1.6467e+06	1.733e+06	1.45865e+06	1.0596e+06	2.08743e+06	1.66614e+06	1.65524e+06	21.86	1.28057e+06	1.30543e+06	17.23	1.3	0.38	0.0206682	1.68	0.117429	1.37545	271.165	512.4	8.5	Up
M271T82	9.29779e+06	9.47048e+06	2.11063e+06	6.25944e+06	8.20872e+06	8.70171e+06	6.80121e+06	6.34364e+06	5.28886e+06	2.70391e+06	4.88565e+06	5.30138e+06	969821	5.15952e+06	2.52817e+06	8.39595e+06	4.40416e+06	5.02258e+06	51.87	7.1492e+06	7.50496e+06	33.64	0.62	-0.7	0.0281274	1.55	0.141969	1.15472	270.872	81.7	1.4	Down
M272T200	419536	426552	344375	407857	315820	228162	375451	393062	399056	437512	685500	465464	535611	690741	306846	786546	538409	500537	31	363852	384256	18.31	1.48	0.57	0.0206682	1.68	0.117429	1.43561	272.089	199.7	3.3	Up
M272T326	408497	170350	368820	135127	418885	298971	436115	281908	105627	63295.1	48726.3	158794	160049	319254	62767.8	157343	134482	131485	65.49	314834	333895	36.36	0.43	-1.23	0.00699301	2.16	0.0602244	1.69746	272.133	326.3	5.4	Down
M272T407	190006	433176	192060	327893	153729	152176	175846	132273	336531	830288	487416	433315	340859	1.88276e+06	1.21927e+06	1.01487e+06	818163	658852	66.15	219645	182926	47.87	3.72	1.9	0.000621601	3.21	0.0140919	1.89212	272.151	407	6.8	Up
M272T411_2	8.1854e+06	7.22089e+06	7.61257e+06	6.42698e+06	8.98169e+06	790518	1.01575e+07	3.02791e+06	2.76044e+06	4.9116e+06	1.97633e+06	1.26675e+06	4.84969e+06	3.46408e+06	1.45359e+06	2.73397e+06	2.92706e+06	2.74721e+06	48	6.55043e+06	7.41673e+06	47.85	0.45	-1.16	0.0281274	1.55	0.141969	1.20193	271.86	411	6.8	Down
M272T452	480945	682386	305959	1.04894e+06	606966	747726	281892	805409	1.0848e+06	4.0948e+06	2.01858e+06	1.74792e+06	1.17315e+06	2.11935e+06	5.05497e+06	1.08527e+06	2.29736e+06	1.88325e+06	64.67	620027	644676	41.84	3.71	1.89	0.0001554	3.81	0.00610078	1.96371	272.185	452.4	7.5	Up
M272T527	542188	591715	628152	155467	465199	902109	544027	890071	1.17209e+06	1.16051e+06	771933	923888	817380	866330	515826	1.13165e+06	919950	895109	24.82	589866	567871	40.41	1.56	0.64	0.0379176	1.42	0.171246	1.35719	272.186	526.6	8.8	Up
M272T58	3.17041e+06	3.68216e+06	3.07033e+06	2.87222e+06	2.54884e+06	3.34288e+06	3.12413e+06	3.60252e+06	3.0247e+06	5.20474e+06	3.03614e+06	3.73294e+06	3.74012e+06	4.71387e+06	4.25121e+06	3.846e+06	3.94372e+06	3.79306e+06	19.27	3.17668e+06	3.14727e+06	11.69	1.24	0.31	0.0379176	1.42	0.171246	1.41085	271.872	58	1	Up
M272T591_2	561239	1.98944e+06	965444	588310	1.5435e+06	724271	1.33363e+06	1.1421e+06	2.53003e+06	1.3778e+06	3.44859e+06	2.77193e+06	1.18349e+06	873860	1.49919e+06	2.15884e+06	1.98047e+06	1.82901e+06	45.04	1.10599e+06	1.05377e+06	45.28	1.79	0.84	0.0379176	1.42	0.171246	1.37595	272.186	591.1	9.9	Up
M272T72	1.95636e+06	1.54651e+06	1.83048e+06	1.44572e+06	1.54401e+06	1.72161e+06	1.85903e+06	2.21646e+06	1.84481e+06	2.09573e+06	2.05422e+06	2.20569e+06	1.66075e+06	3.79412e+06	2.65905e+06	2.38513e+06	2.33744e+06	2.15071e+06	28.4	1.76502e+06	1.77604e+06	14.43	1.32	0.41	0.0281274	1.55	0.141969	1.42234	271.557	71.8	1.2	Up
M272T99	416309	506998	593782	982811	903323	821286	677887	688617	889216	2.73271e+06	1.55693e+06	1.08779e+06	1.14472e+06	937193	971188	831361	1.26889e+06	1.02949e+06	49.92	698877	683252	27.87	1.82	0.86	0.004662	2.33	0.0475536	1.64642	272.134	99.4	1.7	Up
M273T432	162756	467405	200704	120447	42586.8	219297	55662.7	54242.6	428019	1.39251e+06	1.02197e+06	364890	576376	930781	492777	967477	771849	753579	46.74	165388	141601	84.55	4.67	2.22	0.000621601	3.21	0.0140919	1.97262	273.134	431.6	7.2	Up
M273T452	179865	134024	115879	144741	362212	100982	144154	147406	158719	169646	493534	165997	260846	433664	834149	345190	357718	303018	64.48	166158	144447	49.7	2.15	1.11	0.0104118	1.98	0.0771942	1.49684	273.188	452.4	7.5	Up
M273T550	155908	126244	153191	153237	92811.7	55800.9	162673	140659	233600	245830	200617	205667	115016	219679	214111	279539	214257	216895	22.15	130065	146925	28.82	1.65	0.72	0.004662	2.33	0.0475536	1.61457	273.199	549.5	9.2	Up
M273T72	2.13957e+06	1.86401e+06	1.9614e+06	2.27719e+06	2.44518e+06	647616	3.16195e+06	2.91619e+06	6.86777e+06	6.35383e+06	6.57635e+06	1.0156e+07	9.99806e+06	7.36853e+06	7.2347e+06	7.71771e+06	7.78412e+06	7.30161e+06	19.02	2.17664e+06	2.20838e+06	35.09	3.58	1.84	0.0001554	3.81	0.00610078	2.21496	272.942	71.8	1.2	Up
M273T747	551110	529931	1.93104e+06	910764	1.26944e+06	527890	1.27286e+06	658143	340039	195159	402820	817269	358867	594140	353765	126452	398564	356316	54.97	956397	784453	52.56	0.42	-1.26	0.00699301	2.16	0.0602244	1.65259	273.184	747.3	12.5	Down
M273T88	1.95577e+07	1.55621e+07	2.52205e+07	1.64214e+07	2.13975e+07	1.87862e+07	2.39462e+07	3.33714e+07	2.10278e+07	3.98776e+07	3.13121e+07	2.22566e+07	2.86857e+07	3.66753e+07	3.8836e+07	4.0056e+07	3.23409e+07	3.39937e+07	23.99	2.17829e+07	2.04776e+07	26.45	1.48	0.57	0.014763	1.83	0.0952789	1.65367	273.075	87.8	1.5	Up
M274T105_1	418991	641355	398966	703667	445025	371739	427448	524370	275890	393995	233608	454371	297399	285026	328830	299631	321094	298515	22.07	491445	436236	24.68	0.65	-0.61	0.004662	2.33	0.0475536	1.80699	273.584	105	1.8	Down
M274T341	6.72082e+06	6.1408e+06	6.64121e+06	6.98039e+06	3.32463e+06	7.40696e+06	6.71892e+06	4.21342e+06	5.83514e+06	1.13817e+07	1.36739e+07	9.37465e+06	7.65006e+06	8.50642e+06	6.82336e+06	1.14942e+07	9.34243e+06	8.94053e+06	28.54	6.01839e+06	6.68007e+06	24.12	1.55	0.63	0.0104118	1.98	0.0771942	1.53341	274.165	341.2	5.7	Up
M274T418	49045.5	439600	382859	64200	488427	41204.7	871276	407544	605928	860824	580287	591256	469489	534166	714096	718164	634276	598592	19.54	343020	395202	83.23	1.85	0.89	0.014763	1.83	0.0952789	1.40333	274.163	418.5	7	Up
M274T553	146509	110735	150779	92726	67345.2	104288	97759.1	211122	95191.4	320922	211339	254106	281982	189609	209556	319048	235219	232722	32.07	122658	107511	36.77	1.92	0.94	0.0104118	1.98	0.0771942	1.7107	274.238	553.2	9.2	Up
M274T589	186054	528569	902159	94295.6	1.20746e+06	221144	769621	1.08983e+06	1.74142e+06	871644	824270	2.32197e+06	1.42108e+06	1.03595e+06	983707	1.9117e+06	1.38897e+06	1.22852e+06	39.85	624892	649095	68.96	2.22	1.15	0.0206682	1.68	0.117429	1.54612	274.201	588.9	9.8	Up
M274T692	626383	872484	798973	467523	1.86019e+06	2.33252e+06	630471	1.35229e+06	1.52012e+06	2.53125e+06	3.5189e+06	1.70129e+06	1.78578e+06	1.54281e+06	3.10804e+06	3.13867e+06	2.35586e+06	2.15851e+06	34.69	1.1176e+06	835728	59.98	2.11	1.08	0.0104118	1.98	0.0771942	1.77109	274.201	692	11.5	Up
M275T105	1.37502e+06	733992	1.56032e+06	1.03188e+06	2.41419e+06	1.47337e+06	2.77047e+06	2.63819e+06	3.10636e+06	3.16302e+06	4.20846e+06	3.7249e+06	3.24695e+06	2.96357e+06	2.92909e+06	3.23244e+06	3321848	3.19773e+06	13.05	1.74968e+06	1.51685e+06	43.59	1.9	0.92	0.0001554	3.81	0.00610078	1.92175	275.096	104.5	1.7	Up
M275T362	1.58146e+06	758170	727557	1.68814e+06	746471	864966	873828	775381	542681	648285	749656	695464	683612	779097	761755	781411	705245	722560	11.58	1.002e+06	820174	39.44	0.7	-0.51	0.0498834	1.3	0.201689	1.33643	275.106	361.7	6	Down
M275T428	750706	759983	738196	566488	629912	280295	655762	622851	599283	151639	1.11178e+06	540978	183284	209747	80585.5	105021	372790	196516	95.87	625524	642837	24.92	0.6	-0.75	0.0281274	1.55	0.141969	1.38593	275.142	428	7.1	Down
M275T464	16379.5	48108.1	54101.3	53425	368663	14884.7	17522.8	781367	1.07031e+06	8.51919e+06	4.28213e+06	23813.6	5.54909e+06	1.96277e+06	1.3183e+06	1.05758e+07	4.16268e+06	3.12245e+06	91.55	169306	50766.6	161.91	24.59	4.62	0.0029526	2.53	0.0361958	1.85407	275.105	464.3	7.7	Up
M275T643	716202	1.7297e+06	1.62862e+06	479534	1.65456e+06	1.004e+06	1.1285e+06	920047	2.04295e+06	2.75447e+06	1.02954e+06	1.36327e+06	1.94617e+06	1.14192e+06	1.6229e+06	2.01928e+06	1.74006e+06	1.78453e+06	32.65	1.15765e+06	1.06625e+06	40.41	1.5	0.59	0.0498834	1.3	0.201689	1.27115	275.233	642.6	10.7	Up
M275T699_1	2.66883e+06	2.30206e+06	1.50727e+06	3.83715e+06	1.1939e+06	1.04225e+06	2.67465e+06	3.28388e+06	4.26434e+06	4.91538e+06	3.03802e+06	3.21672e+06	4.5352e+06	3.34123e+06	3.06264e+06	4.97239e+06	3.91824e+06	3.80278e+06	21.44	2313749	2.48544e+06	43.34	1.69	0.76	0.00699301	2.16	0.0602244	1.60267	275.187	699.4	11.7	Up
M275T81	5.21039e+07	1.19797e+08	1.68215e+08	4.8509e+07	2.01634e+08	1.68985e+08	1.68436e+08	1.34778e+08	1.74561e+08	1.80023e+08	1.75434e+08	1.70134e+08	1.89341e+08	1.96431e+08	1.74949e+08	1.4027e+08	1.75143e+08	175191443	9.46	1.32807e+08	1.51497e+08	42.56	1.32	0.4	0.0281274	1.55	0.141969	1.18592	274.873	80.8	1.3	Up
M275T816_1	3.10684e+07	4.03635e+07	2.23034e+07	8.48664e+07	1.38e+07	5.09021e+06	1.63904e+07	2.05825e+07	3.88977e+07	4.40948e+07	5.21864e+07	4.89501e+07	3.1941e+07	3.39079e+07	6.39799e+07	8.53754e+07	4.99167e+07	4.65225e+07	35.48	2.93081e+07	2.14429e+07	84.87	1.7	0.77	0.0206682	1.68	0.117429	1.31867	274.625	816.4	13.6	Up
M276T105	353005	464629	549047	312071	550945	570468	603114	536922	643157	620338	689400	573403	581431	499759	555809	597363	595082	589397	9.66	492525	542985	21.66	1.21	0.27	0.0206682	1.68	0.117429	1.32852	276.002	104.7	1.7	Up
M276T424_1	945175	716787	668365	855031	458632	274603	728025	1.02351e+06	1.20386e+06	783070	630064	989145	1.18175e+06	876860	967011	1.32855e+06	995038	978078	23.5	708766	722406	34.95	1.4	0.49	0.0498834	1.3	0.201689	1.22804	275.514	423.6	7.1	Up
M276T424_2	368867	279206	182777	371083	119882	102147	292446	260293	856643	1.06468e+06	700615	445033	465290	328655	253434	297610	551495	455161	53.11	247088	269749	41.83	2.23	1.16	0.014763	1.83	0.0952789	1.55169	275.848	423.6	7.1	Up
M276T490	1281.79	5618.67	3894.39	14366.3	24912.5	5326.56	19209.8	6594.87	19845.5	72537.3	38606.5	1871.31	19527.6	48317.8	53634.2	67338	40209.8	43462.1	61.94	10150.6	6106.77	82.59	3.96	1.99	0.014763	1.83	0.0952789	1.40893	276.127	489.6	8.2	Up
M276T59	1.32062e+07	1.28965e+07	1.15048e+07	1.1942e+07	1.15751e+07	1.07861e+07	1.47133e+07	1.19474e+07	9.39761e+06	5.42013e+06	9.58517e+06	1.49044e+07	1.02716e+07	1.09783e+07	8.19946e+06	9.27768e+06	9.75429e+06	9.49139e+06	27.36	1.23214e+07	1.19447e+07	10.03	0.79	-0.34	0.014763	1.83	0.0952789	1.40428	275.908	58.9	1	Down
M277T344	2.32952e+06	1.92205e+06	1.40356e+06	1.38575e+06	2.38028e+06	2.9397e+06	1.63107e+06	1.15125e+06	1.67788e+07	2.60645e+07	1.85683e+07	1.88823e+06	1.13703e+07	6.44562e+06	1.22438e+07	1.3932e+07	1.34114e+07	1.30879e+07	55.31	1.8929e+06	1.77656e+06	32.44	7.09	2.82	0.0018648	2.73	0.0275628	2.0996	277.184	344	5.7	Up
M277T392	8.80916e+06	7.58964e+06	1.04288e+07	8.99396e+06	8.97071e+06	9.86425e+06	1.11048e+07	1.11722e+07	7.05638e+06	3.97567e+06	8.93264e+06	8.6817e+06	7.80658e+06	9.56021e+06	8.19781e+06	6.63235e+06	7.60542e+06	8.00219e+06	23.07	9.61669e+06	9.4291e+06	12.99	0.79	-0.34	0.014763	1.83	0.0952789	1.30208	277.183	391.5	6.5	Down
M277T417	9951.86	58815.6	6332.59	6894.17	55212.8	4831.36	5746.08	180323	74702.5	387455	892702	109153	84330.2	289957	130913	627865	324635	210435	91.97	41013.4	8423.02	148.05	7.92	2.98	0.0018648	2.73	0.0275628	1.91768	276.532	417.4	7	Up
M277T704	305977	219287	118123	103466	186172	82603.2	148073	122531	230764	458785	1.76047e+06	251708	647772	522124	911704	187137	621308	490454	83.78	160779	135302	45.82	3.86	1.95	0.0018648	2.73	0.0275628	1.79797	277.248	704.1	11.7	Up
M277T707	1.67039e+06	1.88185e+06	847212	1.93712e+06	1.26651e+06	1.0287e+06	2.4328e+06	1.3957e+06	2.68625e+06	1.96398e+06	1.41131e+06	1.96883e+06	2.52421e+06	1.96489e+06	1.83706e+06	2.7997e+06	2.14453e+06	1.96686e+06	22.26	1.55753e+06	1.53305e+06	33.65	1.38	0.46	0.0206682	1.68	0.117429	1.27576	277.128	707.2	11.8	Up
M277T816	4.05759e+06	5.73138e+06	5.13228e+06	1.277e+07	1.91911e+06	441207	3.28168e+06	3.44605e+06	8.11853e+06	4.30922e+06	9.50139e+06	6.59716e+06	9.2996e+06	4.79427e+06	1.00491e+07	1.38978e+07	8.32089e+06	8.70906e+06	37.45	4.59742e+06	3.75182e+06	80.62	1.81	0.86	0.0281274	1.55	0.141969	1.26196	276.623	816.4	13.6	Up
M278T133	96797.5	239108	292831	94471.2	238242	251396	290105	218267	263058	293131	277764	326031	258115	308357	255162	274182	281975	275973	8.98	215152	238675	36.28	1.31	0.39	0.0206682	1.68	0.117429	1.22927	277.98	132.6	2.2	Up
M278T679	831368	493642	523616	503583	159393	79402.1	464931	714076	1.02959e+06	830697	641605	594861	1.10995e+06	822361	623626	1.02057e+06	834157	826529	24.31	471251	498612	53.43	1.77	0.82	0.0104118	1.98	0.0771942	1.37355	278.232	679.1	11.3	Up
M278T815	4.67279e+06	3.19026e+06	9.47091e+06	7.00789e+06	6.95941e+06	2.13241e+06	5.07073e+06	1.9206e+06	6.97518e+06	1.47793e+07	2.1378e+07	9.489e+06	5.52953e+06	6.8891e+06	1.23851e+07	2.05255e+07	1.22438e+07	1.09371e+07	50.5	5.05312e+06	4.87176e+06	52.32	2.42	1.28	0.0104118	1.98	0.0771942	1.64472	278.247	815	13.6	Up
M279T155	2.38178e+06	5.24876e+06	8.96307e+06	2.4455e+06	2.9072e+06	7.57019e+06	5.73361e+06	8.87454e+06	8.55414e+06	8.22965e+06	8.43772e+06	8.3756e+06	9.97036e+06	9.00231e+06	8.33989e+06	7.7546e+06	8.58304e+06	8.40666e+06	7.67	5.51558e+06	5.49119e+06	50.15	1.56	0.64	0.0379176	1.42	0.171246	1.52448	279.008	155.1	2.6	Up
M279T457_2	425192	384158	481976	401765	549771	586683	468742	408097	325956	302635	375971	397489	322488	510929	348180	272489	357017	337068	20.64	463298	446967	15.83	0.77	-0.38	0.00699301	2.16	0.0602244	1.55322	279.188	456.7	7.6	Down
M279T790	8.37101e+06	5.55868e+06	3.7276e+06	7.23168e+06	1.82066e+06	2.61218e+06	5.35619e+06	6.1847e+06	8.5523e+06	1.04657e+07	8.07871e+06	9.15374e+06	1.21109e+07	7.30557e+06	8.7376e+06	9.39805e+06	9.22533e+06	8.94567e+06	16.18	5.10784e+06	5.45744e+06	44.1	1.81	0.85	0.000621601	3.21	0.0140919	1.68048	279.093	789.6	13.2	Up
M279T82_1	2.09158e+07	9.9028e+06	1.19845e+07	2.12699e+07	1.86032e+06	7.95341e+06	1.21038e+07	1.31842e+07	2.01077e+06	9.87461e+06	2.06133e+06	4.91668e+06	2.87491e+06	5.25196e+06	3.86471e+06	7.83596e+06	4.83637e+06	4.3907e+06	57.98	1.23968e+07	1.20442e+07	51.85	0.39	-1.36	0.014763	1.83	0.0952789	1.46917	278.88	82.3	1.4	Down
M279T83	5.76514e+06	6.61931e+06	5.13353e+06	6.09604e+06	4.82102e+06	3.36064e+06	4.8347e+06	4.49944e+06	6.16786e+06	1.69527e+08	7.138e+06	5.49645e+06	6.50833e+06	2.16334e+07	5.56353e+06	7.48458e+06	2.86899e+07	6.82316e+06	199.23	5.14123e+06	4.98411e+06	19.81	5.58	2.48	0.0104118	1.98	0.0771942	1.10657	279.153	82.9	1.4	Up
M280T324	165150	29945.8	120557	155814	38017.3	10022.9	124276	175406	751600	118931	547480	301152	377153	37188.8	274829	305138	339184	303145	66.99	102398	122416	64.84	3.31	1.73	0.0281274	1.55	0.141969	1.38995	280.084	323.7	5.4	Up
M280T389	166831	213058	614390	691477	117752	106398	693436	249109	911152	1.31057e+06	763184	904427	697953	1.69753e+06	1.43408e+06	1.11073e+06	1.1037e+06	1.01094e+06	31.79	356556	231083	73.43	3.1	1.63	0.0001554	3.81	0.00610078	1.89377	280.129	389.4	6.5	Up
M280T451	4.79447e+06	4.51787e+06	3.83627e+06	3.7071e+06	2.39911e+06	2.22397e+06	1.91816e+06	4.78341e+06	5.89825e+06	3.31684e+06	3.90896e+06	5.43636e+06	9.05038e+06	4.97531e+06	3.12816e+06	5.19179e+06	5.11326e+06	5.08355e+06	36.86	3.52254e+06	3.77168e+06	33.68	1.45	0.54	0.0498834	1.3	0.201689	1.188	280.185	451.4	7.5	Up
M280T504	248727	871448	436089	304411	602033	193141	159349	523487	269407	1.06867e+06	1.92289e+06	1.01275e+06	1.11669e+06	819637	971925	1.98004e+06	1.14525e+06	1.04071e+06	49.27	417335	370250	57.99	2.74	1.46	0.004662	2.33	0.0475536	1.68436	280.201	504.4	8.4	Up
M280T59	271770	786927	920833	812453	609880	628479	784392	881045	1.13924e+06	1.39009e+06	1.57056e+06	1.33379e+06	1.33672e+06	940599	870104	1.05035e+06	1.20393e+06	1.23651e+06	20.15	711972	785659	29.29	1.69	0.76	0.000621601	3.21	0.0140919	1.71979	279.923	59	1	Up
M280T654	75180.8	26423.1	107045	46232.6	44636.3	190317	171314	265310	265687	238413	58972.3	294482	315973	220695	200362	139423	216751	229554	38.96	115807	91112.9	73.42	1.87	0.9	0.0281274	1.55	0.141969	1.32838	280.157	653.8	10.9	Up
M280T733	266732	264528	425605	856300	1.0409e+06	958187	686978	1.31816e+06	758715	5.95065e+06	3.32913e+06	1.07475e+06	1.3873e+06	1.53392e+06	2.78214e+06	2.49776e+06	2.4143e+06	2.01584e+06	69.75	727174	771639	52.91	3.32	1.73	0.0029526	2.53	0.0361958	1.77839	280.191	733.1	12.2	Up
M280T90_2	300904	333204	297795	330867	272641	231737	239326	302874	351758	2.78855e+06	378766	309600	359122	2.06681e+06	2.42976e+06	2.20736e+06	1.36147e+06	1.22279e+06	80.88	288668	299350	13.18	4.72	2.24	0.000621601	3.21	0.0140919	1.6108	280.194	90.1	1.5	Up
M281T111	458108	487315	519759	544594	82586.9	311290	462440	579484	702511	825636	641459	649345	878498	538177	640870	897443	721742	675928	18.03	430697	474878	37.59	1.68	0.74	0.000621601	3.21	0.0140919	1.4001	281.108	110.7	1.8	Up
M281T121	380125	2.71558e+06	4.86915e+06	312870	2.17375e+06	624313	4.70716e+06	3.42183e+06	7.13527e+06	9.03163e+06	7.14401e+06	8.26599e+06	8.64877e+06	6.2716e+06	6.42759e+06	7.67418e+06	7.57488e+06	7.40909e+06	13.35	2.4006e+06	2.44467e+06	77.46	3.16	1.66	0.0001554	3.81	0.00610078	1.81368	281.141	121.4	2	Up
M281T199	1.76988e+06	1.48565e+06	1.95063e+06	2.12365e+06	2.15035e+06	1.75686e+06	2.75731e+06	2.09327e+06	2.93041e+06	4.10616e+06	2.67365e+06	2.69089e+06	3.15772e+06	3.11813e+06	3.38829e+06	3.36711e+06	3.17905e+06	3.13793e+06	14.55	2.01095e+06	2.02195e+06	18.78	1.58	0.66	0.000621601	3.21	0.0140919	2.10171	281.116	199	3.3	Up
M281T304	93552.5	153721	89584.8	135511	69881.9	81319.1	121048	101853	138910	874698	134324	70466.2	126419	790381	780106	668960	448033	403935	79.96	105809	97703	27.04	4.23	2.08	0.0379176	1.42	0.171246	1.47944	281.117	303.9	5.1	Up
M281T350	1.47233e+06	2.01896e+06	2.73389e+06	1.27563e+06	3.63131e+06	5.54408e+06	2.30575e+06	2.00317e+06	656765	563671	1.02135e+06	1.4614e+06	896801	1.53039e+06	1.65667e+06	431902	1.02737e+06	959076	45.97	2.62314e+06	2.16236e+06	53.04	0.39	-1.35	0.0029526	2.53	0.0361958	1.75093	281.107	350.1	5.8	Down
M281T38	4.05275e+06	4.35998e+06	4.77619e+06	4.36708e+06	3.4916e+06	3.154e+06	4.6321e+06	4.94389e+06	5.05845e+06	5.95382e+06	4.70692e+06	4.32389e+06	5.6909e+06	4.76942e+06	5.20971e+06	5.89356e+06	5.20083e+06	5.13408e+06	11.51	4.2222e+06	4.36353e+06	14.82	1.23	0.3	0.014763	1.83	0.0952789	1.57738	281.245	37.6	0.6	Up
M281T64	3.45686e+06	3.13085e+06	1.84588e+06	3.86618e+06	1.62958e+06	7.20115e+06	1.15215e+07	1.06174e+06	1.56458e+07	2.22096e+06	1.10395e+07	9.41804e+06	8.18673e+06	6.78442e+06	8.10867e+06	5.85883e+06	8.40786e+06	8.1477e+06	46.69	4.21422e+06	3.29385e+06	83.37	2	1	0.0498834	1.3	0.201689	1.32253	281.244	64	1.1	Up
M281T769	635104	722797	265577	926135	1.15527e+06	389525	479516	1.47843e+06	2.19991e+06	1.27711e+06	1.37292e+06	2.46624e+06	2.32499e+06	1.47562e+06	1.02681e+06	1.5291e+06	1.70909e+06	1.50236e+06	31.63	756545	678951	54.21	2.26	1.18	0.0029526	2.53	0.0361958	1.81347	281.267	769.2	12.8	Up
M281T92	803314	1.8473e+06	313257	1.05158e+06	748028	186514	912958	209629	1.49609e+06	2.45453e+06	2.14098e+06	1.47768e+06	1.3563e+06	2.01011e+06	1.75324e+06	2.98904e+06	1.95975e+06	1.88167e+06	28.57	759072	775671	72.57	2.58	1.37	0.0018648	2.73	0.0275628	1.7343	281.104	91.7	1.5	Up
M282T327	3.68526e+06	4.31897e+06	1.09041e+06	3.43034e+06	2.02904e+06	1.21742e+06	1.00078e+06	871300	674702	1.23978e+06	3.16162e+06	592647	192531	763549	153499	693826	934020	684264	103.05	2.20544e+06	1.62323e+06	63.29	0.42	-1.24	0.014763	1.83	0.0952789	1.44954	281.594	326.7	5.4	Down
M282T356	989030	2.13666e+06	2.93471e+06	1.61493e+06	2.31493e+06	213635	3.47017e+06	3.24254e+06	1.83988e+07	8.11039e+07	2.30417e+07	3.48659e+06	5.7901e+06	3.30465e+06	1.83893e+07	5.20783e+06	1.98404e+07	1.20897e+07	130.88	2.11458e+06	2.22579e+06	53.48	9.38	3.23	0.0003108	3.51	0.00894927	1.76828	282.044	356.4	5.9	Up
M282T371	719435	1.46106e+06	436756	637200	2.21785e+06	54105.6	1.43474e+06	704456	3.07166e+06	2.0246e+06	4.54005e+06	2.77136e+06	1.10573e+06	666369	3.0641e+06	1.13252e+06	2.29705e+06	2.39798e+06	56.89	958201	711945	72.52	2.4	1.26	0.0379176	1.42	0.171246	1.31365	282.117	371.2	6.2	Up
M282T395	458106	559924	364002	255265	363166	360821	285337	417132	579559	1.77702e+06	1.02754e+06	592543	861111	452765	830263	643764	845570	737014	49.59	382969	363584	25.2	2.21	1.14	0.000621601	3.21	0.0140919	1.87533	282.227	395.4	6.6	Up
M282T819	693168	329940	850431	1.38995e+06	1.05743e+06	566341	965049	572003	6.37807e+06	5.52594e+06	2.93974e+06	3.60497e+06	4.86105e+06	2.42193e+06	2.90482e+06	4.43256e+06	4.13363e+06	4.01876e+06	33.89	803039	771799	41.65	5.15	2.36	0.0001554	3.81	0.00610078	2.27102	281.604	819	13.7	Up
M283T121	3.49576e+06	1.83419e+06	1.54369e+06	3.07295e+06	382450	2.09869e+06	2.91418e+06	2.60859e+06	4.34231e+06	4.67882e+06	5.74392e+06	4.06183e+06	5.31997e+06	4.99098e+06	6.04994e+06	4.94501e+06	5.0166e+06	4.968e+06	13.42	2.24381e+06	2.35364e+06	44.51	2.24	1.16	0.0001554	3.81	0.00610078	1.73746	283.122	121.5	2	Up
M283T141	3.71451e+06	965477	3.65459e+06	664946	4.01942e+06	2.1919e+06	3.34788e+06	576447	9.25967e+06	1.02546e+07	9.52968e+06	6.63847e+06	7.28137e+06	7.84781e+06	8.34143e+06	9.93034e+06	8.63542e+06	8.80055e+06	15.17	2.3919e+06	2.76989e+06	61.73	3.61	1.85	0.0001554	3.81	0.00610078	2.0165	283.042	140.9	2.3	Up
M283T214	2.59408e+06	3.70613e+06	3.23452e+06	2.44149e+06	3.55338e+06	4.1533e+06	3.56666e+06	4.43935e+06	3.9868e+06	5.03875e+07	4.48856e+06	4.05533e+06	3.50582e+06	2.91193e+07	4.37896e+07	1.84746e+07	1.97259e+07	1.14816e+07	97.66	3.46111e+06	3.56002e+06	20.01	5.7	2.51	0.014763	1.83	0.0952789	1.54815	283.042	213.7	3.6	Up
M283T321_1	1.68301e+06	1.24583e+06	1.70478e+06	831421	693365	1.17994e+06	1.22871e+06	1.6571e+06	699534	1.31731e+07	1.78099e+06	2.83696e+06	989064	3.30703e+07	3.20442e+06	1.55853e+07	8.91745e+06	3.02069e+06	126.93	1.27802e+06	1.23727e+06	30.22	6.98	2.8	0.0498834	1.3	0.201689	1.33787	282.575	320.6	5.3	Up
M283T321_2	3.69933e+06	1.88922e+07	3.37217e+06	3.65285e+06	2.27436e+06	2.01756e+06	3.21976e+06	3.26838e+06	1.97301e+06	2.02631e+06	3.09835e+06	3.36104e+06	1.98395e+06	1.62571e+06	1.40126e+06	1.64539e+06	2.13938e+06	1.97848e+06	33.19	5.04958e+06	3.32027e+06	111.43	0.42	-1.24	0.00699301	2.16	0.0602244	1.3644	283.076	320.6	5.3	Down
M283T63	7.22006e+06	4.20951e+06	3.32875e+06	8.41711e+06	7.14324e+06	7.07509e+06	6.53188e+06	5.8743e+06	6.05684e+06	9.45231e+06	9.48247e+06	8.52007e+06	9.40771e+06	9.28623e+06	8.7945e+06	4.6064e+06	8.20082e+06	9.04037e+06	22.49	6.22499e+06	6.80349e+06	27.17	1.32	0.4	0.0281274	1.55	0.141969	1.19447	283.266	63.4	1.1	Up
M283T780	509288	628336	789442	1.43977e+06	2.03995e+06	875347	649103	1.01238e+06	865844	3.13342e+06	1.05532e+06	1.87039e+06	2.30113e+06	928230	2.25182e+06	3.07759e+06	1.93547e+06	2.0611e+06	47.48	992951	832394	51.59	1.95	0.96	0.0206682	1.68	0.117429	1.46426	283.189	780.2	13	Up
M284T279	4.00307e+07	1.74868e+07	1.55775e+07	3.00375e+07	1.75172e+08	5.68664e+07	4.42601e+07	1.49001e+07	2.04405e+08	2.8293e+08	3.44777e+08	7.45776e+07	1.80364e+07	1.93847e+07	1.05252e+08	6.72897e+07	1.39581e+08	8.99146e+07	88.45	4.92914e+07	3.50341e+07	107.67	2.83	1.5	0.0498834	1.3	0.201689	1.14838	284.098	279.1	4.7	Up
M284T313	61436.1	50334	62691.9	57302.5	47276	54234.2	74058.7	51287.2	61853.3	1.82537e+06	68123.5	52652.4	70175	2.2456e+06	1.71214e+06	1.78085e+06	977095	891157	101.29	57327.6	55768.4	15.06	17.04	4.09	0.014763	1.83	0.0952789	1.49573	284.099	313	5.2	Up
M284T321_1	370606	101090	310785	339669	327810	65472.7	686865	461533	516168	1.8557e+06	413434	551409	464897	1.15079e+06	1.01428e+06	1.23896e+06	900704	782845	56.29	332979	333740	58.88	2.7	1.44	0.0029526	2.53	0.0361958	1.62946	283.573	320.6	5.3	Up
M284T356	465014	62242.2	777105	409600	939322	834655	1.15683e+06	822506	1.17175e+06	1.33329e+06	1.19537e+06	1.49627e+06	941621	883554	604990	744839	1046461	1.05669e+06	29.03	683409	799806	50.96	1.53	0.61	0.0498834	1.3	0.201689	1.14222	284.041	356.4	5.9	Up
M284T443	64597.3	318597	499767	281544	481828	27488.9	710908	64542.7	1.96335e+06	2.22757e+06	2.34419e+06	552396	1.48322e+06	1.16535e+06	1.12381e+06	3.43915e+06	1.78738e+06	1.72328e+06	50.52	306159	300071	80.7	5.84	2.55	0.0003108	3.51	0.00894927	1.89755	284.206	442.5	7.4	Up
M284T570	5.56864e+06	4.40298e+06	6.03318e+06	4.29588e+06	4.62572e+06	9.34422e+06	2.12949e+06	4.68827e+06	3.00646e+06	878664	1.07723e+06	4.28996e+06	2.94657e+06	1.95897e+06	2.1333e+06	1.71273e+06	2.25048e+06	2.04613e+06	50	5.13605e+06	4.657e+06	39.93	0.44	-1.19	0.0018648	2.73	0.0275628	1.75033	284.057	569.8	9.5	Down
M284T72_1	206559	775761	506218	172488	443751	506907	363974	900522	993555	458767	550405	605730	726464	934608	719102	1.60514e+06	824221	722783	44.17	484522	474985	52.31	1.7	0.77	0.0379176	1.42	0.171246	1.35339	283.94	72.4	1.2	Up
M284T80	2.57053e+06	9.16468e+06	2.4346e+06	2.56418e+06	2.13969e+06	9.98932e+06	8.7805e+06	8.64101e+06	3.09064e+06	5.7784e+06	9.57144e+06	1.06327e+07	9.37621e+06	1.07552e+07	1.12658e+07	9.08634e+06	8.69458e+06	9.47382e+06	32.5	5.78556e+06	5.60577e+06	62.47	1.5	0.59	0.0379176	1.42	0.171246	1.10616	284.002	80.2	1.3	Up
M284T83	6.25127e+07	5.30306e+07	8.12066e+07	7.24644e+07	6.14651e+07	5.88417e+07	9.86766e+07	7.02795e+07	4.77565e+06	3.88405e+06	6.80511e+06	3.64249e+06	4.70274e+06	3.14583e+06	3.46056e+06	3.76121e+06	4.2722e+06	3.82263e+06	27.4	6.98096e+07	6.63961e+07	20.94	0.06	-4.03	0.0001554	3.81	0.00610078	2.45926	284.137	82.5	1.4	Down
M285T128	1.42441e+06	1.57566e+06	294288	2.37565e+06	1.90194e+06	3.21181e+06	1.74524e+06	1.29185e+06	227659	351763	2.01714e+06	1.11438e+06	168726	325388	1.01999e+06	1.32369e+06	818591	685874	80.67	1.72761e+06	1.66045e+06	48.98	0.47	-1.08	0.0379176	1.42	0.171246	1.26654	285.007	128.4	2.1	Down
M285T213	178776	281032	352943	275212	323168	328700	285679	263473	330994	2.6705e+06	463577	793701	308015	1.82509e+06	2.41312e+06	1.965e+06	1.34625e+06	1.3094e+06	72.66	286123	283355	18.6	4.71	2.23	0.0018648	2.73	0.0275628	1.78109	285.037	213.5	3.6	Up
M285T235	1.13246e+06	686190	528467	1.93474e+06	1.42004e+06	1.0545e+06	412040	528493	506647	526455	974751	268672	383900	1.15804e+06	74072.7	388584	535141	447616	67.38	962116	870347	54.83	0.56	-0.85	0.0379176	1.42	0.171246	1.1779	285.037	235.3	3.9	Down
M285T300	3.67442e+06	3.84863e+06	4.06583e+06	4.4942e+06	3.63946e+06	3.39382e+06	1.14213e+07	7.44646e+06	1.92675e+07	2.28204e+07	7.25495e+06	4.19413e+06	4.55234e+06	6.82567e+06	2.52726e+07	2.67723e+07	1.462e+07	1.32612e+07	67.17	5.24801e+06	3.95723e+06	53.59	2.79	1.48	0.014763	1.83	0.0952789	1.47387	285.082	300.1	5	Up
M285T490	699678	603698	968412	555275	860915	670534	721168	576540	214607	208013	693244	616189	394921	227999	631507	332955	414929	363938	49.04	707027	685106	20.31	0.59	-0.77	0.0206682	1.68	0.117429	1.60841	285.16	489.7	8.2	Down
M285T591	804540	1.39697e+06	1.54244e+06	1.02268e+06	3.05165e+06	3.73253e+06	1.19815e+06	1.01888e+06	197003	1.39312e+06	418251	635914	259902	1.17303e+06	921433	1.3016e+06	787532	778673	60.4	1.72098e+06	1.29756e+06	62.3	0.46	-1.13	0.0379176	1.42	0.171246	1.39747	285.152	591	9.8	Down
M285T744	1.41938e+06	362986	642016	1.15575e+06	699754	448774	580385	791347	1.39342e+06	766928	1.40656e+06	2.32094e+06	2.10198e+06	1.87668e+06	1.21089e+06	1.74363e+06	1.60263e+06	1.57509e+06	31.59	762548	670885	46.93	2.1	1.07	0.004662	2.33	0.0475536	1.78557	285.289	743.6	12.4	Up
M285T95	1.81691e+07	1.53646e+07	1.71134e+07	1.25992e+07	1.95934e+07	7.29037e+06	1.96113e+07	1.73671e+07	6.86781e+06	838707	1.30049e+07	4.37194e+06	3.54235e+06	799888	1.70322e+06	3.06549e+06	4.27428e+06	3.30392e+06	95.01	1.58886e+07	1.72403e+07	26.22	0.27	-1.89	0.000621601	3.21	0.0140919	1.92275	285.127	94.6	1.6	Down
M286T122	3.55255e+07	1.74591e+07	3.90702e+07	3.40484e+07	5.24076e+07	4.04195e+07	7.24046e+07	6.96098e+07	7.90452e+07	7.13387e+07	6.1038e+07	8.21416e+07	6.99848e+07	6.22872e+07	5.57456e+07	7.09915e+07	6.90716e+07	7.04881e+07	13.04	4.51181e+07	3.97448e+07	41.34	1.53	0.61	0.014763	1.83	0.0952789	1.6093	286.095	121.6	2	Up
M287T108	1.47325e+06	1.39279e+06	1.93639e+06	1.07858e+06	1.84839e+06	1.07774e+06	2.11843e+06	1.3475e+06	2.42652e+06	2.53401e+06	2.71036e+06	1.93044e+06	1.80607e+06	1.92125e+06	1.82109e+06	1.88304e+06	2.1291e+06	1.92585e+06	17.14	1.53414e+06	1.43302e+06	25.56	1.39	0.47	0.0379176	1.42	0.171246	1.62787	287.135	107.5	1.8	Up
M287T122	28615	2.93197e+06	79558.2	29105.8	21416.7	24318.3	3.7373e+06	105832	242434	2.71738e+06	2.71998e+06	9.60374e+06	2.98443e+06	3.47191e+06	356649	8.92438e+06	3.87761e+06	2.85221e+06	91.19	869764	54332	176.69	4.46	2.16	0.0206682	1.68	0.117429	1.60335	287.1	121.6	2	Up
M287T323	553518	469723	407588	452016	457070	441658	523925	375624	161897	255612	179972	374253	266285	372141	225667	207754	255448	240640	31.55	460140	454543	12.51	0.56	-0.85	0.0001554	3.81	0.00610078	2.05185	286.892	323.4	5.4	Down
M287T394	194814	66280.4	201130	266975	388215	130721	222776	222374	759154	573291	701140	400477	307545	369106	677515	400989	523652	487140	33.38	211661	211752	44.66	2.47	1.31	0.000621601	3.21	0.0140919	1.92696	287.179	393.6	6.6	Up
M287T599	501442	334936	720115	173112	615323	117147	533764	261908	681892	800515	484871	1.60185e+06	523960	807665	336761	1.059e+06	787064	741203	50.66	407218	418189	53.43	1.93	0.95	0.0379176	1.42	0.171246	1.36569	287.149	598.8	10	Up
M287T610	367215	299729	325976	848913	334458	209495	409621	666539	1.15838e+06	1.36637e+06	970407	329822	1.15885e+06	894057	306549	1.22315e+06	925948	1.06439e+06	43.44	432743	350837	49.51	2.14	1.1	0.0281274	1.55	0.141969	1.47629	287.204	609.6	10.2	Up
M287T63	928219	315379	957621	972854	3.90877e+06	3.10769e+06	3.92167e+06	3.43365e+06	3.73652e+06	3.7274e+06	4.34275e+06	3.54569e+06	4.39971e+06	5.93079e+06	6.31937e+06	6.65688e+06	4.83239e+06	4.37123e+06	26.24	2.19323e+06	2.04027e+06	69.89	2.2	1.14	0.004662	2.33	0.0475536	1.66725	287.221	62.7	1	Up
M287T691_1	2.6862e+06	3.15841e+06	2.06607e+06	2.85678e+06	3.22606e+06	3.42723e+06	3.71263e+06	2.64834e+06	2.00718e+06	1.51719e+06	2.30617e+06	2.67479e+06	2.1812e+06	3.68313e+06	2.56731e+06	1.32817e+06	2.28314e+06	2.24368e+06	32.19	2.97272e+06	3.0076e+06	17.41	0.77	-0.38	0.0379176	1.42	0.171246	1.27894	286.739	691.2	11.5	Down
M287T72	4.36659e+06	4.01412e+06	4.15178e+06	4.50909e+06	3.3904e+06	3.22479e+06	4.35961e+06	4.33754e+06	5.63833e+06	6.56853e+06	5.53025e+06	5.1992e+06	5.92948e+06	5.12102e+06	5.38935e+06	6.52773e+06	5.73799e+06	5.58429e+06	9.76	4.04424e+06	4.24466e+06	11.88	1.42	0.5	0.0001554	3.81	0.00610078	2.12678	286.958	71.7	1.2	Up
M287T771	2.80432e+07	1.79513e+07	4.17526e+07	1.20406e+07	3.0269e+07	4.33948e+07	3.06439e+07	3.03097e+07	5.18503e+06	7.93893e+06	1.73545e+07	1.09995e+07	1.4654e+07	1.64459e+07	1.58137e+07	7.28793e+06	1.19599e+07	1.28267e+07	39.49	2.93006e+07	3.02894e+07	36.16	0.41	-1.29	0.0018648	2.73	0.0275628	1.79833	287.276	771	12.8	Down
M287T804	6.58986e+06	5.74881e+06	1.66086e+07	1.37284e+07	1.55398e+07	6.6069e+06	6.01651e+06	1.22458e+07	1.56369e+07	2.62884e+07	2.26994e+07	1.29294e+07	1.81076e+07	2.69786e+07	3.17515e+07	3.811e+07	2.40627e+07	2.44939e+07	35.2	1.03856e+07	9.42634e+06	44.45	2.32	1.21	0.0018648	2.73	0.0275628	1.89579	286.624	804.2	13.4	Up
M288T116	784446	413672	464942	562676	511439	463715	1.27712e+06	610377	502730	377392	385557	287184	475330	295479	295838	482602	387764	381475	23.29	636048	537058	44.59	0.61	-0.71	0.014763	1.83	0.0952789	1.53747	288.192	115.8	1.9	Down
M288T485_1	941860	1.08398e+06	620507	1.62096e+06	682301	599440	262434	949589	832488	195021	597370	371869	763048	570558	528195	487955	543313	549377	37.43	845134	812081	48.09	0.64	-0.64	0.0498834	1.3	0.201689	1.01057	288.193	484.6	8.1	Down
M288T505	778160	376402	319575	708686	194223	384787	924981	600507	1.55909e+06	1.07965e+06	1.44684e+06	1.02457e+06	1.19316e+06	652405	490948	985043	1.05396e+06	1.05211e+06	34.27	535915	492647	47.62	1.97	0.98	0.00699301	2.16	0.0602244	1.57624	288.126	505.2	8.4	Up
M288T565	111661	186666	214366	104186	633160	75864.3	120035	69152.1	285192	423576	167866	327213	228380	227837	663863	134417	307293	256786	55.47	189386	115848	98.38	1.62	0.7	0.0281274	1.55	0.141969	1.21208	288.145	565	9.4	Up
M288T728	180065	346961	189309	425443	498705	144461	254883	386534	688256	1.23886e+06	3.93646e+06	808059	424882	560528	1.26e+06	742563	1.20745e+06	775311	94.57	303295	300922	42.75	3.98	1.99	0.000621601	3.21	0.0140919	1.88349	288.198	727.7	12.1	Up
M288T733	1.04528e+06	2.97803e+06	1.59683e+06	2.96739e+06	1.84127e+06	1.22871e+06	1.8756e+06	2.67297e+06	1.24053e+06	787712	1.29042e+06	2.15971e+06	746015	811100	1.42091e+06	1.26108e+06	1.21468e+06	1.2508e+06	38.22	2.02576e+06	1.85844e+06	37.55	0.6	-0.74	0.0498834	1.3	0.201689	1.45881	288.253	732.9	12.2	Down
M288T804_1	2.76888e+06	2.42221e+06	7.53189e+06	5.34108e+06	6.10806e+06	3.06773e+06	2.76739e+06	5.73454e+06	5.77061e+06	1.27612e+07	8.10998e+06	4.5655e+06	7.10582e+06	6.04395e+06	4.662e+06	1.08886e+07	7.48846e+06	6.57489e+06	39.57	4.46772e+06	4.20441e+06	43.44	1.68	0.75	0.0498834	1.3	0.201689	1.46576	287.625	804.2	13.4	Up
M288T811_2	2.10396e+07	1.73479e+07	6.43269e+06	2.16952e+07	9.32042e+06	9.92349e+06	1.22598e+07	1.81198e+07	2.87285e+07	4.78808e+07	2.25341e+07	2.3939e+07	4.38863e+07	2.35801e+07	2.22332e+07	3.40692e+07	3.08564e+07	2.63338e+07	32.84	1.45174e+07	1.48039e+07	39.79	2.13	1.09	0.0001554	3.81	0.00610078	1.83225	288.252	810.6	13.5	Up
M288T811_3	2.90835e+08	1.91703e+08	1.55949e+08	2.42819e+08	1.62137e+08	5.16714e+08	3.91451e+08	2.57629e+08	1.43585e+08	3.48785e+08	2.32771e+08	1.72395e+08	1.35748e+08	1.68419e+08	8.55559e+07	1.27563e+08	1.76853e+08	1.56002e+08	46.01	2.76155e+08	250224059	44.86	0.64	-0.64	0.0498834	1.3	0.201689	1.22633	288.29	811.4	13.5	Down
M289T422_1	1.59892e+06	1.49601e+06	1.02775e+06	1.5886e+06	256130	135290	1.40688e+06	1.6602e+06	2.50587e+06	2.10766e+06	1.86779e+06	2.16965e+06	2.72141e+06	1.63836e+06	1.81763e+06	2.79142e+06	2.20247e+06	2.13866e+06	19.54	1.14622e+06	1.45144e+06	54.02	1.92	0.94	0.0003108	3.51	0.00894927	1.38751	288.687	422.2	7	Up
M289T422_2	1.70042e+06	2.35919e+06	1.55547e+06	1.03115e+06	1.589e+06	1.60725e+06	1.65591e+06	2.0848e+06	1.39274e+06	1.02003e+06	1.19782e+06	1.68223e+06	1.47472e+06	1.29019e+06	1.06341e+06	1.15283e+06	1.28425e+06	1.244e+06	17.41	1.6979e+06	1.63158e+06	23.07	0.76	-0.4	0.0281274	1.55	0.141969	1.41304	288.938	422.2	7	Down
M289T442	126063	116419	124274	104512	66404.7	53393.5	150491	94897.7	152472	352361	165883	160058	203329	221003	154178	206502	201973	184606	32.84	104557	110466	30.82	1.93	0.95	0.0001554	3.81	0.00610078	1.83753	289.162	442.3	7.4	Up
M289T443	38499.4	65187.4	94818.3	276171	107944	16381.4	139557	38463.6	390850	295146	2.21478e+06	513049	469900	248105	274436	430028	604537	410439	108.78	97127.8	80002.9	85.61	6.22	2.64	0.000621601	3.21	0.0140919	1.93442	289.121	443.1	7.4	Up
M289T560	126506	218040	160895	185344	132423	148406	132464	174226	213118	200312	176204	237848	163524	243205	196681	227049	207243	206715	13.76	159788	154650	19.77	1.3	0.38	0.0104118	1.98	0.0771942	1.5709	289.212	560.1	9.3	Up
M289T72	1.85134e+06	1.26893e+06	1.95554e+06	1.45435e+06	1.85184e+06	1.56763e+06	2.12517e+06	1.82817e+06	1.68251e+06	2.27552e+06	2.09302e+06	2.41919e+06	1.88808e+06	2.02072e+06	2.0817e+06	1.94714e+06	2.05099e+06	2.05121e+06	11.1	1.73787e+06	1.83976e+06	16.28	1.18	0.24	0.0379176	1.42	0.171246	1.38996	288.955	71.7	1.2	Up
M289T99	1.11104e+06	2.2352e+06	719442	2.98207e+06	993033	888466	699811	524200	764022	322729	871313	602727	664882	319313	498387	654243	587202	628485	33.59	1.26916e+06	940749	68.53	0.46	-1.11	0.014763	1.83	0.0952789	1.49491	289.493	99.2	1.7	Down
M290T100_2	934936	573242	476987	749827	731203	594938	359672	563385	1.56928e+06	884382	1.21752e+06	1.18366e+06	1.02886e+06	1.39268e+06	986563	1.08833e+06	1.16891e+06	1.136e+06	19.22	623024	584090	28.62	1.88	0.91	0.0003108	3.51	0.00894927	2.02426	290.469	100.1	1.7	Up
M290T356	1.0089e+06	490634	1.31214e+06	1.06344e+06	1.82386e+06	1.14542e+06	1.67547e+06	1.59815e+06	1.90979e+06	2.83206e+06	1.62669e+06	2.96378e+06	2.00841e+06	1.52934e+06	1.52965e+06	1.40702e+06	1.97584e+06	1.76824e+06	30.6	1.26475e+06	1.22878e+06	34.26	1.56	0.64	0.0281274	1.55	0.141969	1.49225	290.081	356.4	5.9	Up
M290T419	1.00684e+07	5.67711e+06	7.85658e+06	5.74405e+06	6.55526e+06	6.53191e+06	1.07061e+07	4.5132e+06	8.0836e+06	7.35216e+06	8.82239e+06	2.04225e+07	1.50205e+07	1.27239e+07	8.19725e+06	1.88247e+07	1.24309e+07	1.07732e+07	41.6	7.20658e+06	6.54359e+06	30.34	1.72	0.79	0.014763	1.83	0.0952789	1.48092	290.189	418.6	7	Up
M290T486_2	467383	414311	325018	307402	396358	648548	507285	250253	232562	225113	201696	357440	304061	446822	377649	131738	284635	268311	36.88	414570	405335	30.64	0.69	-0.54	0.0379176	1.42	0.171246	1.29879	289.941	485.9	8.1	Down
M290T636	576346	482587	1.3281e+06	2.29111e+06	2.45235e+06	2.08348e+06	2.01015e+06	1.84394e+06	2.65041e+06	1.1413e+07	6.10682e+06	1.58885e+06	2.64371e+06	948282	6.663e+06	3.10455e+06	4.38983e+06	2.87748e+06	79.31	1.63351e+06	1.92705e+06	46.43	2.69	1.43	0.0281274	1.55	0.141969	1.37939	290.232	635.5	10.6	Up
M290T690	3.89988e+06	2.49803e+06	894593	3.47011e+06	387990	355240	2.92933e+06	2.54915e+06	7.30417e+06	7.67562e+06	5.4903e+06	4.85793e+06	8.11779e+06	2.41644e+06	4.34287e+06	8.56058e+06	6.09571e+06	6.39723e+06	35.42	2.12304e+06	2.52359e+06	65.63	2.87	1.52	0.0029526	2.53	0.0361958	1.65487	290.251	689.8	11.5	Up
M290T806_1	4.42894e+06	3.32763e+06	9.45391e+06	1.1529e+07	4.97985e+06	4.05725e+06	5.71668e+06	2.55335e+06	1.13418e+07	6.57385e+06	1.4397e+07	1.0342e+07	9.57721e+06	6.51961e+06	5.40052e+06	1.4861e+07	9.87663e+06	9.95959e+06	36.29	5.75583e+06	4.70439e+06	54.31	1.72	0.78	0.0206682	1.68	0.117429	1.40776	289.601	806	13.4	Up
M290T91	4.39606e+06	2.13937e+06	1.76934e+06	5.90621e+06	2.94191e+06	2.00749e+06	519763	2.20879e+06	5.19059e+06	4.51746e+06	6.79886e+06	1.47761e+06	2.55167e+06	6.13172e+06	4.92681e+06	7.4737e+06	4.88355e+06	5.0587e+06	41.82	2.73612e+06	2.17408e+06	61.56	1.78	0.84	0.0498834	1.3	0.201689	1.21108	290.089	90.6	1.5	Up
M291T122	3.87469e+06	392802	5.19424e+06	4.31385e+06	1.15873e+07	6.0384e+06	6.58667e+06	8.30539e+06	1.07245e+07	9.55443e+06	1.49134e+07	7.10205e+06	9.58402e+06	8.05587e+06	6.92954e+06	7.96581e+06	9.35371e+06	8.80515e+06	27.83	5.78667e+06	5.61632e+06	56.93	1.62	0.69	0.0281274	1.55	0.141969	1.2295	291.081	121.9	2	Up
M291T309	1.3502e+06	233500	1.03457e+06	208810	1.01591e+06	196963	1.05142e+06	1.18655e+06	1.45785e+06	1.87966e+06	1.20694e+06	2.0882e+06	1.25427e+06	706378	987120	1.21026e+06	1.34883e+06	1.23226e+06	33.53	784739	1.02524e+06	61.85	1.72	0.78	0.0498834	1.3	0.201689	1.34611	290.998	308.8	5.1	Up
M291T636	238831	136164	327668	485836	186013	206954	147891	230460	443371	2.82041e+06	522224	155116	290593	209856	899300	878139	777377	482797	112.16	244977	218707	46.62	3.17	1.67	0.0498834	1.3	0.201689	1.31211	291.235	635.6	10.6	Up
M291T680	1.54145e+06	1.76647e+06	1.75162e+06	2.17656e+06	2.11972e+06	1.70804e+06	1.52547e+06	1.66975e+06	2.58329e+06	1.81559e+06	1.82394e+06	2.30788e+06	2.65643e+06	1.89457e+06	1.80339e+06	1.67469e+06	2.06997e+06	1.85925e+06	18.69	1.78238e+06	1.72983e+06	13.62	1.16	0.22	0.0498834	1.3	0.201689	1.06464	291.181	680.5	11.3	Up
M291T728	343640	438990	249922	510522	298184	329667	696276	490362	886326	944376	4.57082e+06	969882	670819	602138	851106	356834	1.23154e+06	868716	110.83	419695	391315	34.6	2.93	1.55	0.004662	2.33	0.0475536	1.53417	291.185	727.7	12.1	Up
M291T825	1.68126e+07	7.15896e+06	5.69244e+06	2.02144e+07	3.82486e+06	5.09253e+06	8.76797e+06	2.4794e+07	3.36587e+07	4.50199e+07	3.11346e+07	3.25605e+07	4.03962e+07	2.94756e+07	3.58992e+07	3.52874e+07	3.5429e+07	3.44731e+07	14.4	1.15447e+07	7.96347e+06	68.74	3.07	1.62	0.0001554	3.81	0.00610078	2.03469	290.609	825.2	13.8	Up
M292T101	83400.3	98467.2	219811	113238	99634.3	16980.5	889708	141114	1.29863e+06	2.92505e+06	1.20941e+06	128074	1.45192e+06	1.92809e+06	2.43131e+06	2.12548e+06	1687246	1690004	51.09	207794	106436	135.39	8.12	3.02	0.0010878	2.96	0.0203124	1.93211	291.907	100.5	1.7	Up
M292T114_2	3.18503e+06	4.31986e+06	3.86378e+06	3.24357e+06	2.98659e+06	2.76624e+06	3.85561e+06	3.2781e+06	672811	76312.2	2.15046e+06	2.38288e+06	1.64989e+06	197864	119367	808590	1.00727e+06	740701	92.48	3.43735e+06	3.26084e+06	15.22	0.29	-1.77	0.0001554	3.81	0.00610078	1.79233	292.102	114.2	1.9	Down
M292T414	557667	281239	537914	253966	416103	317681	533229	239683	241047	166659	178179	149749	192291	292184	138816	200270	194899	185235	25.94	392185	366892	34.66	0.5	-1.01	0.0018648	2.73	0.0275628	1.9082	292.048	413.6	6.9	Down
M292T443	2.3331e+06	2.11739e+06	2.01224e+06	3.03692e+06	2.11941e+06	2.2881e+06	4.26605e+06	3.75969e+06	3.81701e+06	2.72868e+07	5.50901e+06	3.79954e+06	3.91776e+06	1.12527e+07	1.31982e+07	7.51846e+06	9.53744e+06	6.51373e+06	83.97	2.74161e+06	2.3106e+06	31.22	3.48	1.8	0.0010878	2.96	0.0203124	1.79845	292.192	443.5	7.4	Up
M292T444	1.28813e+06	1.13958e+06	3.41282e+06	1.72885e+06	1.28132e+06	1.2727e+06	4.24331e+06	2.02114e+06	2.53427e+06	7.05409e+06	2.60368e+06	2.03832e+06	3.13484e+06	7.0669e+06	8.08996e+06	5.80273e+06	4.7906e+06	4.46878e+06	51.38	2.04848e+06	1.50849e+06	56.5	2.34	1.23	0.0104118	1.98	0.0771942	1.62763	292.442	443.5	7.4	Up
M292T500_2	1.03601e+06	1.78719e+06	2.48577e+06	3.20443e+06	1.89774e+06	1.44047e+06	2.10577e+06	1.57764e+06	2.07125e+06	2.66234e+06	2.44614e+06	2.07074e+06	3.17243e+06	2.24599e+06	2.66498e+06	3.69515e+06	2.62863e+06	2.55424e+06	21.51	1.94188e+06	1.84246e+06	34.53	1.35	0.44	0.0498834	1.3	0.201689	1.31252	291.859	499.9	8.3	Up
M292T500_3	90284.2	312464	214374	134092	228146	202055	332867	439528	323339	963985	520552	348649	986175	501294	187763	1.1345e+06	620782	510923	57.42	244226	221260	46.28	2.54	1.35	0.014763	1.83	0.0952789	1.57896	292.193	500	8.3	Up
M292T570	489931	533435	880203	539848	625302	656460	940419	683282	2.24016e+06	651762	727888	611469	1.8933e+06	1.9437e+06	839765	1.36604e+06	1284261	1.1029e+06	51.7	668610	640881	24.49	1.92	0.94	0.0498834	1.3	0.201689	1.43438	292.065	569.8	9.5	Up
M292T770	978978	1.07615e+06	1.71192e+06	3.30549e+06	1.68404e+06	1.18305e+06	3.08893e+06	988482	5.64404e+06	2.59629e+06	4.71253e+06	2.78522e+06	2.99771e+06	2.80387e+06	3.09454e+06	4.09547e+06	3.59121e+06	3046125	30.84	1.75213e+06	1.43355e+06	53.57	2.05	1.04	0.014763	1.83	0.0952789	1.78631	292.211	769.8	12.8	Up
M292T771	532083	340599	535255	292537	554118	1.00326e+06	546170	653897	706418	1.18559e+06	1.10241e+06	619620	2.50678e+06	1.12205e+06	1.61683e+06	918496	1.22227e+06	1.11223e+06	49.41	557240	540712	38.76	2.19	1.13	0.0018648	2.73	0.0275628	1.79088	292.121	770.8	12.8	Up
M292T819_1	5.38361e+06	2.56282e+06	6.61255e+06	6.64996e+06	8.21477e+06	4.40029e+06	7.7608e+06	4.44431e+06	9.96989e+07	1.94756e+07	3.86214e+07	2.32953e+07	7.41223e+07	1.77344e+07	6.82186e+07	7.9978e+07	5.26431e+07	5.342e+07	60.25	5.75364e+06	5.99808e+06	33.17	9.15	3.19	0.0001554	3.81	0.00610078	2.22657	291.609	819	13.7	Up
M292T819_2	7.52924e+06	4.76759e+06	5.24541e+06	7.76626e+06	6.83822e+06	4.90549e+06	4.65158e+06	6.78988e+06	8.37565e+06	1.16811e+07	8.28078e+06	6.3592e+06	1.20172e+07	1.15473e+07	1.20097e+07	1.16994e+07	1.02463e+07	1.16142e+07	21.69	6.06171e+06	6.01764e+06	21.47	1.69	0.76	0.0018648	2.73	0.0275628	1.94715	292.111	819.1	13.7	Up
M292T825_1	7.02889e+06	4.37891e+06	7.47058e+06	1.98365e+06	2.97495e+07	2.19246e+06	2.50462e+07	1.24991e+07	7.46771e+07	3.1481e+07	2.40966e+07	3.64249e+07	5.43411e+07	3.33904e+07	1.71943e+07	2.94845e+07	3.76362e+07	3.24357e+07	48.95	1.12937e+07	7.24973e+06	93.55	3.33	1.74	0.0029526	2.53	0.0361958	1.81851	291.609	825.3	13.8	Up
M292T825_2	8.28887e+06	4.14842e+06	5.46574e+06	4.58405e+06	8.16879e+06	7.53709e+06	3.11436e+06	5.32044e+06	8.0989e+06	3.4305e+07	8.57726e+06	7.94763e+06	2.0393e+07	5.73605e+06	4.95031e+06	3.39232e+07	1.54914e+07	8.33808e+06	80.31	5.82847e+06	5.39309e+06	33.43	2.66	1.41	0.0379176	1.42	0.171246	1.39544	292.111	825	13.8	Up
M293T114_1	798700	584075	250832	4.74588e+06	380066	2.7125e+06	1.74246e+06	871393	3.18883e+06	1.03971e+07	1.89327e+06	998876	5.17411e+06	7.63029e+06	8.35327e+06	4.77348e+06	5.30116e+06	4.97379e+06	61.99	1.51074e+06	835046	101.95	3.51	1.81	0.004662	2.33	0.0475536	1.6189	293.007	114.3	1.9	Up
M293T326	1.90113e+06	2.36018e+06	2.14777e+06	1.92422e+06	1.92591e+06	2.17931e+06	1.97328e+06	1.97655e+06	1.97202e+06	2.51168e+06	4.79835e+06	2.39629e+06	2.2183e+06	2.25276e+06	2.08928e+06	2.0691e+06	2.53847e+06	2.23553e+06	36.64	2.04854e+06	1.97492e+06	7.98	1.24	0.31	0.0498834	1.3	0.201689	1.03195	293.171	326.1	5.4	Up
M293T619	4.63878e+06	3.18343e+06	2.50812e+06	4.8764e+06	878055	510400	5.36377e+06	7.87167e+06	1.22947e+07	1.39855e+07	5.52038e+06	5.39741e+06	8.23854e+06	3.86414e+06	7.6729e+06	9.51438e+06	8.311e+06	7.95572e+06	42.17	3.72883e+06	3.91111e+06	65.89	2.23	1.16	0.00699301	2.16	0.0602244	1.46286	293.205	619.2	10.3	Up
M293T654	1.02734e+06	918570	1.32791e+06	1.24388e+06	1.4669e+06	670122	1.01839e+06	1.25948e+06	765116	940734	564410	892294	501996	1.64724e+06	829732	277438	802370	797424	50.86	1.11657e+06	1.13561e+06	22.96	0.72	-0.48	0.0498834	1.3	0.201689	1.17318	293.214	654.1	10.9	Down
M293T660	494077	186022	470599	576210	898002	337253	404843	322533	463400	798651	525557	730281	1.24364e+06	497308	1.80684e+06	516647	822790	627919	57.59	461192	437721	46.26	1.78	0.84	0.0379176	1.42	0.171246	1.35239	293.196	660.1	11	Up
M293T766	665856	1.18306e+06	1.03992e+06	483282	1.23661e+06	1.62749e+06	822225	1.0749e+06	230929	11629.2	457012	447744	421801	861161	1.07869e+06	45527.1	444312	434773	83.72	1.01667e+06	1.05741e+06	35.24	0.44	-1.19	0.0104118	1.98	0.0771942	1.35377	293.201	766	12.8	Down
M293T819_1	2.39592e+06	2.70352e+06	4.66934e+06	2.64668e+06	3.28909e+06	1.63901e+06	5.25995e+06	2.81148e+06	3.02018e+07	1.311e+07	1.12899e+07	6.34929e+06	1.20308e+07	5.95936e+06	6.07534e+06	2.36204e+07	1.35796e+07	1.16604e+07	65.37	3.17687e+06	2.7575e+06	37.98	4.27	2.1	0.0001554	3.81	0.00610078	2.01712	292.607	818.9	13.6	Up
M293T819_2	1.21762e+06	78375.3	1.23013e+06	1.43582e+06	2.39328e+06	667924	2.99916e+06	604877	1.09149e+07	3.58526e+06	4.88492e+06	4.04914e+06	1.17151e+07	6.09957e+06	2.76742e+06	1.07951e+07	6.85143e+06	5.49225e+06	53.87	1.3284e+06	1.22388e+06	72.44	5.16	2.37	0.0003108	3.51	0.00894927	1.87506	293.108	819	13.7	Up
M293T839_2	447082	1.83231e+06	1.08582e+06	689336	1.16062e+06	750641	1.24485e+06	676161	1.41839e+06	1.69949e+06	2.05369e+06	7.08898e+06	755775	1.57648e+06	693731	1.37922e+06	2.08322e+06	1.49743e+06	99.53	985853	918229	44.6	2.11	1.08	0.0498834	1.3	0.201689	1.08451	293.118	838.9	14	Up
M294T116_2	77126.9	631405	707862	78563.4	709048	727446	1.31757e+06	754345	805290	1.32714e+06	1.02263e+06	674512	923676	913385	987291	980590	954314	952133	19.75	625421	708455	63.95	1.53	0.61	0.0281274	1.55	0.141969	1.17949	294.477	116.5	1.9	Up
M294T141	2.27532e+07	2.47162e+07	2.39693e+07	2.17641e+07	2.76153e+07	3.48559e+07	2.68407e+07	2.35944e+07	1.80589e+07	1.57377e+07	2.15509e+07	2.24018e+07	1.76709e+07	2.74803e+07	2.60977e+07	1.27566e+07	2.02194e+07	1.98049e+07	25.13	2.57636e+07	2.43428e+07	16.16	0.78	-0.35	0.0379176	1.42	0.171246	1.34393	294.155	140.7	2.3	Down
M294T379_1	452588	293711	390219	456915	244870	122106	487147	442264	691960	641552	606721	489678	644808	385238	364582	705230	566221	624137	23.87	361227	416242	35.64	1.57	0.65	0.0206682	1.68	0.117429	1.41295	293.604	378.9	6.3	Up
M294T392	335275	741304	364391	715858	388679	365332	432106	338247	154172	271769	293037	361286	219177	82054.5	244054	284168	238715	257911	36.53	460149	377006	36.64	0.52	-0.95	0.000621601	3.21	0.0140919	1.70302	294.144	392	6.5	Down
M294T410_2	1.11013e+06	1.39927e+06	1.31753e+06	1.881e+06	1.72933e+06	1.87663e+06	2.04615e+06	1.28172e+06	1.35291e+06	994757	1.37613e+06	1.27793e+06	947368	1.81205e+06	996262	531624	1.16113e+06	1.1371e+06	32.83	1.58022e+06	1.5643e+06	21.78	0.73	-0.44	0.0379176	1.42	0.171246	1.28403	294.193	410	6.8	Down
M294T548	9.4507e+06	3.36272e+06	1.66853e+07	1.00349e+07	1.41921e+07	3.19992e+06	1.76299e+07	1.04078e+07	2.58806e+07	3.14806e+07	3.56759e+07	1.66773e+07	1.26975e+07	1.54132e+07	1.33955e+07	2.0886e+07	2.15133e+07	1.87817e+07	40.2	1.06204e+07	1.02214e+07	51.35	2.03	1.02	0.0206682	1.68	0.117429	1.56099	294.19	548.3	9.1	Up
M294T619	518326	321504	251580	679926	93278.5	50564.1	210515	450520	873985	689219	606512	559500	1.15553e+06	563576	477359	1.07022e+06	749488	647866	33.91	322027	286542	67.07	2.33	1.22	0.0029526	2.53	0.0361958	1.59267	294.208	619.2	10.3	Up
M294T653	276166	119380	251019	407129	163716	255509	216518	465212	603571	938590	382630	446384	505519	397526	517233	597309	548595	511376	32.4	269331	253264	43.11	2.04	1.03	0.0029526	2.53	0.0361958	1.85013	294.164	652.8	10.9	Up
M294T839_2	206362	173007	312407	142095	184857	194564	279433	287066	203800	312277	383086	271858	398348	411985	204231	303160	311093	307719	26.48	222474	200463	27.85	1.4	0.48	0.0498834	1.3	0.201689	1.37966	294.243	838.9	14	Up
M294T99_2	1.48836e+06	1.11781e+06	1.07805e+06	2.88353e+06	833911	685421	132362	1.08953e+06	543845	609102	714543	242904	425897	380829	452246	499604	483621	475925	29.84	1.16362e+06	1.08379e+06	68.75	0.42	-1.27	0.014763	1.83	0.0952789	1.17042	294.082	98.9	1.6	Down
M295T152	8.8343e+06	3.75752e+06	7.6814e+06	3.29813e+06	7.75654e+06	5.35765e+06	9.00036e+06	5.84354e+06	2.98982e+06	1.56755e+06	1.09851e+06	4.13673e+06	3.88553e+06	7.46472e+06	1.35522e+06	4.61143e+06	3.38869e+06	3.43768e+06	62.87	6.44118e+06	6.76247e+06	34.29	0.53	-0.93	0.0206682	1.68	0.117429	1.50124	295.131	151.9	2.5	Down
M295T186	2.04153e+06	3.24669e+06	2.35269e+06	4.41954e+06	4.12515e+06	5.01308e+06	1.75535e+06	5.17961e+06	1.93488e+07	7.1575e+06	4.59249e+06	6.95876e+06	5.80486e+06	7.87217e+06	6.07816e+06	6.82985e+06	8.08032e+06	6.89431e+06	57.68	3.51671e+06	3.68592e+06	38.6	2.3	1.2	0.000621601	3.21	0.0140919	1.77976	295.158	186.2	3.1	Up
M295T350	3.12831e+06	944146	2.50378e+06	3.45201e+06	1.65297e+06	1.39797e+06	5.21023e+06	3.18341e+06	723460	648445	1.64788e+06	465186	730816	200279	566551	466864	681185	607498	62.7	2.6841e+06	2.81605e+06	51.15	0.25	-1.98	0.000621601	3.21	0.0140919	1.95212	295.129	349.6	5.8	Down
M295T415	35752.8	33551.3	30084.5	21532.2	37028.5	25716.1	34599.2	199845	30004.8	85055.1	203560	35812.7	222635	198586	169451	67275.9	126548	127253	63.35	52263.7	34075.2	114.55	2.42	1.28	0.0379176	1.42	0.171246	1.45182	295.137	415.3	6.9	Up
M295T447_2	1.37794e+07	1.61255e+07	1.13165e+07	2.27974e+07	1.05882e+07	1.87613e+07	1.88306e+07	2.31984e+07	6.94517e+06	5.66582e+06	1.10496e+07	1.4125e+07	8.53273e+06	1.1007e+07	1.01625e+07	9.69079e+06	9.64734e+06	9.92666e+06	27.29	1.69247e+07	1.74434e+07	28.51	0.57	-0.81	0.0029526	2.53	0.0361958	1.77793	295.195	446.5	7.4	Down
M295T548	2.08331e+06	1.12383e+06	1.70404e+06	1.29934e+06	1.50301e+06	236778	2.00462e+06	1.69024e+06	2.78855e+06	3.66979e+06	3.78028e+06	1.71619e+06	1.59487e+06	1.17808e+06	2.8903e+06	2.16017e+06	2.47228e+06	2.47436e+06	39.08	1.45565e+06	1.59663e+06	40.51	1.7	0.76	0.0379176	1.42	0.171246	1.22468	295.193	548.3	9.1	Up
M295T697	5.33904e+06	4.74946e+06	6.23057e+06	7.29184e+06	8.04446e+06	7.215e+06	3.81683e+06	1.1202e+07	1.86949e+07	8.83069e+06	6.64313e+06	8.8547e+06	8.99937e+06	9.1038e+06	1.11657e+07	7.57944e+06	9.98396e+06	8.92703e+06	37.59	6.73615e+06	6.72278e+06	34.07	1.48	0.57	0.0281274	1.55	0.141969	1.39694	295.227	697.1	11.6	Up
M295T760	2.10914e+07	3.72586e+07	1.95183e+07	1.96966e+07	1.54585e+07	2.01344e+07	2.01526e+07	2.01699e+07	4.7904e+07	1.91396e+07	2.6547e+07	6.9563e+07	3.20063e+07	2.19611e+07	4.53244e+07	2.7571e+07	3.62521e+07	2.97887e+07	46.77	2.1685e+07	2.01435e+07	30.06	1.67	0.74	0.0281274	1.55	0.141969	1.36379	295.216	759.8	12.7	Up
M296T125	87710.3	87277.4	94287.9	114057	61115.5	132233	57149	77191.4	294704	473704	464770	196522	282050	302717	456680	276816	343495	298711	30.8	88877.7	87493.9	28.4	3.86	1.95	0.0001554	3.81	0.00610078	2.30085	296.135	125.1	2.1	Up
M296T34	6.47695e+06	7.09458e+06	6.40502e+06	8.18657e+06	6.49402e+06	5.44357e+06	7.36734e+06	6.41564e+06	5.84526e+06	5.92633e+06	6.22705e+06	5.52446e+06	6.19748e+06	4.85407e+06	5.68316e+06	6.1483e+06	5.80076e+06	5.8858e+06	7.88	6.73546e+06	6.48548e+06	12.09	0.86	-0.22	0.00699301	2.16	0.0602244	1.53127	295.894	33.9	0.6	Down
M296T348	249376	177938	198643	206064	117081	84300.8	175114	174335	297174	301782	274243	263004	329350	244970	236285	329207	284502	285708	12.55	172857	176526	29.83	1.65	0.72	0.000621601	3.21	0.0140919	1.81685	296.098	348	5.8	Up
M296T380	1.04583e+06	1.18993e+06	700987	1.00843e+06	914705	707977	1.4889e+06	664673	1.51483e+06	2.36882e+06	1.77588e+06	1.13345e+06	1.22999e+06	999179	1.19365e+06	1.12468e+06	1.41756e+06	1.21182e+06	32.32	965179	961568	29.36	1.47	0.55	0.0206682	1.68	0.117429	1.41534	296.135	380.3	6.3	Up
M296T90	1.14488e+06	6.97376e+06	8.82989e+06	1.00767e+06	8.56383e+06	8.00239e+06	1.71255e+07	9.10537e+06	8.99349e+06	1.53598e+07	1.12177e+07	7.7655e+06	1.14212e+07	1.08529e+07	1.04555e+07	1.55351e+07	1.14502e+07	1.10353e+07	24.03	7.59416e+06	8.28311e+06	66.98	1.51	0.59	0.0498834	1.3	0.201689	1.16993	296.02	89.9	1.5	Up
M297T100	102601	606422	660132	663623	123034	84495.6	148785	167918	1.24255e+06	3.93624e+06	984260	795066	1.38049e+06	2.53464e+06	3.40102e+06	2.65191e+06	2.11577e+06	1.95757e+06	55.8	319626	158352	84.43	6.62	2.73	0.0001554	3.81	0.00610078	2.03255	297.201	99.9	1.7	Up
M297T303	154891	285373	302689	189936	205397	262408	353313	220913	237071	472172	323540	256171	447357	314750	368055	386186	350663	345797	23.99	246865	241661	26.64	1.42	0.51	0.0206682	1.68	0.117429	1.47401	297.111	303.2	5.1	Up
M297T474	288861	411467	191398	370850	263416	233691	260033	289749	222242	436311	585884	367763	272427	436068	432574	443287	399569	434321	28.22	288683	276138	24.76	1.38	0.47	0.0498834	1.3	0.201689	1.27876	297.186	473.7	7.9	Up
M297T765	3.62343e+07	3.83498e+07	7.4758e+07	3.97614e+07	9.17829e+07	6.81287e+07	6.25763e+07	5.27806e+07	1.61301e+07	1.4344e+07	1.08912e+07	2.60404e+07	2.29337e+07	4.70006e+07	4.18449e+07	1.47993e+07	2.4248e+07	1.95319e+07	55.42	5.80465e+07	5.76785e+07	34.24	0.42	-1.26	0.004662	2.33	0.0475536	1.84587	297.232	765.4	12.8	Down
M298T312	1.64754e+07	1.80724e+07	1.62929e+07	1.84661e+07	1.09892e+07	1.09336e+07	2.1698e+07	2.04255e+07	2.8049e+07	2.84825e+07	2.25818e+07	2.48092e+07	2.59649e+07	1.95792e+07	1.54237e+07	2.44003e+07	2.36613e+07	2.46047e+07	18.58	1.66691e+07	1.72739e+07	23.77	1.42	0.51	0.0104118	1.98	0.0771942	1.54927	298.114	312.2	5.2	Up
M298T344	1.22626e+06	300399	505844	1.02659e+06	615982	1.63602e+06	634069	672366	461888	399692	669407	536265	311016	177405	274641	355131	398181	377412	39.15	827191	653217	52.89	0.48	-1.05	0.0206682	1.68	0.117429	1.48652	298.151	343.5	5.7	Down
M298T385	1.83941e+08	4.91936e+07	2.0777e+08	2.86944e+08	1.47361e+08	4.14576e+07	1.21522e+08	1.47067e+08	3.49608e+08	5.44556e+08	1.89541e+08	2.67455e+08	3.8266e+08	2.66202e+08	3.87109e+08	6.24302e+08	3.76429e+08	3.66134e+08	38.83	1.48157e+08	1.47214e+08	54.71	2.54	1.35	0.0018648	2.73	0.0275628	1.7664	298.095	385.2	6.4	Up
M299T203	1.89589e+06	1.76147e+06	2.48319e+06	1.19012e+06	2.81154e+06	2.37916e+06	1.93408e+06	1.917e+06	1.00226e+06	1.0169e+06	1.61229e+06	1.14916e+06	1.17188e+06	1.36644e+06	1.16003e+06	964177	1.18039e+06	1.1546e+06	18.33	2.04656e+06	1.92554e+06	24.45	0.58	-0.79	0.000621601	3.21	0.0140919	1.92478	299.023	202.9	3.4	Down
M299T314	5.07629e+06	6.58742e+06	5.07814e+06	9.40783e+06	6.32164e+06	1.41368e+06	5.97423e+06	6.10353e+06	1.0739e+07	1.1874e+07	1.06108e+07	1.10528e+07	1.13341e+07	5.89179e+06	1.00507e+07	1.04351e+07	1.02485e+07	1.06749e+07	18.03	5.74534e+06	6.03888e+06	38.52	1.78	0.83	0.0029526	2.53	0.0361958	1.57982	299.082	314.5	5.2	Up
M299T324	4.41982e+06	4.77147e+06	4.53225e+06	4.3498e+06	4.45136e+06	4.45043e+06	4.49298e+06	4.26906e+06	3.97381e+06	4.80291e+06	1.09979e+07	4.99123e+06	5.45245e+06	4.929e+06	5.51286e+06	5.26339e+06	5.74045e+06	5.12731e+06	37.95	4.46715e+06	4.45089e+06	3.31	1.29	0.36	0.0104118	1.98	0.0771942	1.16777	299.118	324.3	5.4	Up
M299T351	2.77434e+06	5.43408e+06	2.12202e+06	2.45736e+06	1.42613e+06	922970	2.36757e+06	1.55043e+06	814492	888972	936111	1.79444e+06	1.15218e+06	947911	874697	837688	1.03081e+06	912542	31.59	2.38186e+06	2.24479e+06	57.82	0.43	-1.21	0.004662	2.33	0.0475536	1.78292	299.131	351	5.8	Down
M299T352	358372	300797	385177	472450	363372	382322	374344	372065	603670	1.66676e+06	835220	613594	500741	1.05832e+06	1.53654e+06	1.11053e+06	990672	946769	44	376112	373204	12.54	2.63	1.4	0.0001554	3.81	0.00610078	2.06803	299.171	352	5.9	Up
M299T419	5225.27	11139.7	8155.73	143971	123630	9044.08	48257.8	10959.9	394820	1.27166e+06	695956	68048.2	354636	124973	574578	602887	510944	484699	74.29	45047.9	11049.8	125.93	11.34	3.5	0.0010878	2.96	0.0203124	2.00614	298.514	419.1	7	Up
M299T481_1	2.49588e+07	5.53623e+06	1.22554e+06	3.44792e+07	1.44614e+07	1.03991e+07	3.96148e+06	3.52153e+06	1.11355e+06	1.47392e+06	6.27857e+06	1.82623e+06	676276	8.0392e+06	2.5641e+06	1.69006e+06	2.95774e+06	1.75814e+06	90.99	1.23179e+07	7.96765e+06	95.83	0.24	-2.06	0.0379176	1.42	0.171246	1.41695	299.2	480.8	8	Down
M299T568	342306	138539	251343	782128	1.05171e+06	328520	232874	365937	889199	1.05382e+06	616087	723818	622601	686607	627416	908355	765988	705212	21.43	436670	335413	71.79	1.75	0.81	0.0379176	1.42	0.171246	1.60594	299.209	568.4	9.5	Up
M299T97	1.96438e+06	473944	2.0024e+06	830854	2.13912e+06	1.54442e+06	505517	602361	2.10364e+06	3.21728e+06	3.42958e+06	2.12468e+06	2.12281e+06	2.25319e+06	2.06124e+06	2.56927e+06	2.48521e+06	2.18894e+06	21.91	1.25787e+06	1.18764e+06	57.84	1.98	0.98	0.0018648	2.73	0.0275628	1.71638	299.091	97.3	1.6	Up
M300T114	531079	2.46166e+06	2.51046e+06	494111	3.39372e+06	1.39789e+06	3.31275e+06	2.11475e+06	3.08973e+06	2.85254e+06	3.07713e+06	2.92407e+06	3.04178e+06	3.04162e+06	3.92402e+06	4.33412e+06	3.28563e+06	3.05946e+06	16.37	2.02705e+06	2.2882e+06	55.73	1.62	0.7	0.0379176	1.42	0.171246	1.38873	300.129	114	1.9	Up
M300T140	1.08635e+08	1.65119e+08	1.21768e+08	1.26292e+08	1.31898e+08	1.78587e+08	1.28435e+08	9.45187e+07	9.06151e+07	1.19622e+08	1.05718e+08	1.09121e+08	7.70163e+07	1.11543e+08	9.25089e+07	8.83351e+07	9.93099e+07	9.91134e+07	14.44	1.31907e+08	1.27364e+08	20.99	0.75	-0.41	0.00699301	2.16	0.0602244	1.6087	300.083	139.8	2.3	Down
M300T232	1.97441e+07	4.01597e+07	3.82498e+07	2.91317e+07	4.91765e+07	7.95352e+06	4.2555e+07	3.09217e+07	7.15195e+07	9.68179e+07	1.18684e+08	5.18076e+07	4.92583e+07	5.01237e+07	7.25323e+07	8.4364e+07	7.43884e+07	7.20259e+07	33.34	3.22365e+07	3.45858e+07	41.44	2.31	1.21	0.0001554	3.81	0.00610078	1.7818	300.086	232.3	3.9	Up
M300T314	227155	1.02764e+06	440115	1.20726e+06	599675	172572	482081	630887	1.59204e+06	2.20622e+06	1.72797e+06	1.45673e+06	1.39518e+06	1.62019e+06	2.06944e+06	1.9045e+06	1.74653e+06	1.67408e+06	16.6	598423	540878	60.37	2.92	1.55	0.0001554	3.81	0.00610078	1.98909	299.584	314.3	5.2	Up
M300T356	3.45517e+07	1.9011e+07	1.75969e+07	3.16063e+07	2.15733e+07	1.51583e+07	2.90762e+07	2.41463e+07	728405	3.91719e+06	5.01251e+06	677979	975867	748765	902531	5.82434e+06	2.34845e+06	939199	93.28	2.409e+07	2.28598e+07	29.14	0.1	-3.36	0.0001554	3.81	0.00610078	2.23077	300.055	356.4	5.9	Down
M300T385_2	5.76462e+06	932856	3.26394e+06	6.30597e+06	1.53258e+07	2.31881e+06	6.95068e+06	4.11455e+06	2.53662e+06	1.7044e+06	6.25645e+06	813863	1.44363e+06	1.49107e+06	807927	1.14244e+06	2.02455e+06	1.46735e+06	88.79	5.62215e+06	4.93958e+06	78.73	0.36	-1.47	0.0281274	1.55	0.141969	1.37359	300.104	385.2	6.4	Down
M300T436	1.06006e+06	1.99772e+06	3.1406e+06	2.94808e+06	2.99126e+06	4.20471e+06	4.22597e+06	4.65889e+06	8.36076e+06	2.5766e+07	8.48112e+06	3.42753e+06	4.40502e+06	9.11963e+06	2.06246e+07	6.91459e+06	1.08874e+07	8.42094e+06	73.23	3.15341e+06	3.06593e+06	38.48	3.45	1.79	0.0018648	2.73	0.0275628	1.79719	300.198	436.1	7.3	Up
M300T534	931792	485809	427046	1.27024e+06	1.09687e+06	835860	669899	1.02121e+06	1.5059e+06	959755	1.32062e+06	759730	1.56437e+06	1.0864e+06	1.85914e+06	1.3943e+06	1.30628e+06	1.35746e+06	27.25	842340	883826	35.25	1.55	0.63	0.0206682	1.68	0.117429	1.49883	300.159	534.1	8.9	Up
M300T728	2.70309e+07	2.25456e+07	3.34282e+07	2.42557e+07	1.80195e+07	1.04971e+07	2.18966e+07	1.66791e+07	4.80234e+07	3.62831e+07	3.80875e+07	2.73977e+07	2.3994e+07	4.186e+07	3.88997e+07	3.9008e+07	3.66942e+07	3.84936e+07	20.99	2.17941e+07	2.22211e+07	31.86	1.68	0.75	0.0018648	2.73	0.0275628	1.72647	300.2	727.9	12.1	Up
M300T730	4.03751e+06	1.66971e+06	6.08823e+06	5.49576e+06	2.39022e+06	4.05491e+06	2.69164e+06	1.83217e+06	3.57052e+06	1.24945e+07	3.20589e+07	5.96648e+06	8.18816e+06	4.31951e+06	5.11844e+06	5.55492e+06	9.65892e+06	5.7607e+06	98.11	3.53252e+06	3.36457e+06	46.99	2.73	1.45	0.0206682	1.68	0.117429	1.48517	300.253	729.8	12.2	Up
M300T793_2	1.61946e+07	2.38016e+07	3.14921e+07	1.40807e+07	2.24014e+07	2.56879e+07	1.89479e+07	1.16181e+07	7.1584e+06	3.96251e+06	9.23568e+06	1.43486e+07	8.34391e+06	1.3294e+07	1.8551e+07	1.90168e+06	9.59947e+06	8.7898e+06	57.74	2.0528e+07	2.06747e+07	32.07	0.47	-1.1	0.004662	2.33	0.0475536	1.60355	300.325	792.6	13.2	Down
M300T833	6.88801e+07	1.57945e+08	7.51795e+07	2.88114e+08	9.14171e+07	7.38863e+07	8.26818e+07	1.70864e+08	4.15439e+07	7.49943e+06	2.84462e+07	2.48315e+07	6.13668e+07	2.79734e+07	2.87802e+07	3.51334e+07	3.19469e+07	2.86132e+07	48.12	1.26121e+08	8.70495e+07	60.64	0.25	-1.98	0.0001554	3.81	0.00610078	1.98746	299.633	832.9	13.9	Down
M301T260	1.10512e+07	2.19623e+07	1.62851e+07	9.15652e+06	5.90551e+07	2.58256e+07	2.38486e+07	2.50942e+07	3.47273e+07	2.15475e+07	4.01951e+07	7.97236e+07	3.30357e+07	8.92532e+07	2.44144e+07	5.48146e+07	4.72139e+07	3.74612e+07	53.5	2.40348e+07	2.29055e+07	64.55	1.96	0.97	0.0379176	1.42	0.171246	1.43418	301.087	260.2	4.3	Up
M301T385	1.58168e+06	1.36642e+06	1.24795e+06	1.59067e+06	1.17202e+06	876034	1.82409e+06	2.02416e+06	1.81879e+06	2.2346e+06	2.06581e+06	2.069e+06	2.18881e+06	1.90914e+06	1.97792e+06	2.34072e+06	2.0756e+06	2.0674e+06	8.38	1.46038e+06	1.47405e+06	25.36	1.42	0.51	0.0018648	2.73	0.0275628	1.78474	301.095	385.1	6.4	Up
M301T573_1	4.03568e+07	1.86606e+07	2.15306e+07	4.55132e+07	3.23126e+07	1.96359e+07	2.74103e+07	2.61376e+07	5.07774e+07	4.32086e+07	3.55788e+07	3.66847e+07	2.75847e+07	2.44275e+07	6.852e+07	6.39131e+07	4.38369e+07	3.99467e+07	36.79	2.89447e+07	2.6774e+07	33.89	1.51	0.6	0.0498834	1.3	0.201689	1.31039	300.778	573.1	9.6	Up
M301T730	625670	776686	1.44653e+06	640784	1.19004e+06	913324	1.79209e+06	515615	1.36966e+06	2.84815e+06	7.86564e+06	1.62543e+06	3.02188e+06	663662	1.58236e+06	930973	2.48847e+06	1.60389e+06	93.51	987591	845005	45.65	2.52	1.33	0.0379176	1.42	0.171246	1.32425	300.754	729.9	12.2	Up
M301T792_2	2.06276e+06	2.45778e+06	2.26604e+06	1.92091e+06	4.335e+06	2.89861e+06	2.11866e+06	1.97201e+06	892627	494110	1.15939e+06	1.82855e+06	1.04047e+06	2.65408e+06	1.79621e+06	237132	1.26282e+06	1.09993e+06	62.64	2.50397e+06	2.19235e+06	32.14	0.5	-0.99	0.004662	2.33	0.0475536	1.53267	301.329	792.5	13.2	Down
M301T833_1	6.76938e+07	1.58765e+08	6.18706e+07	2.19293e+08	6.20194e+07	7.03915e+07	2.67611e+07	1.163e+08	4.77509e+07	1.88464e+07	3.12203e+07	5.47881e+07	3.45685e+07	3.21909e+07	2.85482e+07	3.13597e+07	3.49091e+07	3.17753e+07	32.34	9.78869e+07	6.90427e+07	64.72	0.36	-1.49	0.00699301	2.16	0.0602244	1.72272	300.633	832.7	13.9	Down
M302T342	705581	546271	400680	741177	193076	42606.6	557425	675166	987191	1.49102e+06	916599	828888	997335	598921	592741	1.22887e+06	955195	951895	31.67	482748	551848	52.37	1.98	0.98	0.004662	2.33	0.0475536	1.35276	302.171	342	5.7	Up
M302T408	853131	641875	1.03636e+06	601945	1.08e+06	565205	1.23918e+06	369434	2.29943e+06	1.50888e+06	2.04959e+06	2.01481e+06	2.67316e+06	2.54099e+06	2.0577e+06	1.80696e+06	2.11894e+06	2.05364e+06	17.9	798391	747503	37.72	2.65	1.41	0.0001554	3.81	0.00610078	2.14656	302.206	407.8	6.8	Up
M302T619	627364	787206	937677	490027	1.06834e+06	1.71398e+06	1.12158e+06	647344	157972	182454	212656	457647	165421	762486	631051	167562	342156	197555	70.85	924189	862441	42.02	0.37	-1.43	0.0029526	2.53	0.0361958	1.83255	302.14	619.2	10.3	Down
M302T647	657100	742931	704101	773356	667549	789442	902543	1.35865e+06	181664	143989	645529	796426	334445	799646	494239	114402	438793	414342	65.21	824459	758144	27.85	0.53	-0.91	0.0379176	1.42	0.171246	1.50127	302.196	646.7	10.8	Down
M302T692	609953	462776	581914	397280	656692	648988	704943	787933	874395	1.21136e+06	1.4175e+06	1.19395e+06	1.10321e+06	975041	1.21477e+06	1.74376e+06	1.21675e+06	1.20265e+06	22.12	606310	629471	20.86	2.01	1	0.0001554	3.81	0.00610078	2.18441	302.269	691.7	11.5	Up
M302T743	2.04278e+06	917652	750687	1.75979e+06	833165	409270	1.22434e+06	724644	2.75103e+06	3.73445e+06	3.3506e+06	1.27104e+06	1.27859e+06	854139	1.63934e+06	1.48414e+06	2.04542e+06	1.56174e+06	52.72	1.08279e+06	875408	51.56	1.89	0.92	0.0379176	1.42	0.171246	1.33456	302.288	742.6	12.4	Up
M302T767	5.19203e+07	3.2673e+07	4.26589e+07	9.95496e+07	3.54525e+07	1.13016e+07	4.58147e+07	5.61477e+07	1.11448e+08	9.2352e+07	5.43908e+07	8.98392e+07	3.90433e+07	5.28563e+07	6.84806e+07	7.51715e+07	7.29476e+07	7.1826e+07	33.04	4.69398e+07	4.42368e+07	54.03	1.55	0.64	0.0498834	1.3	0.201689	1.21231	302.268	767.1	12.8	Up
M303T376	112632	299921	95393.3	32253.5	114805	102116	63366.6	90322.3	161577	235002	369400	358128	156541	85503.1	228263	184680	222387	206472	44.46	113851	98754.7	70.32	1.95	0.97	0.0281274	1.55	0.141969	1.45642	303.167	376.3	6.3	Up
M303T381	25732.2	85482.6	81275.9	418150	79092.9	52146.6	363217	415988	108724	736721	223891	127832	603995	377525	490963	567429	404635	434244	57.7	190136	83379.2	91.99	2.13	1.09	0.0281274	1.55	0.141969	1.28725	303.1	381.2	6.4	Up
M303T744	1.93208e+06	1.00549e+06	937947	2.37284e+06	1.15752e+06	1.56467e+06	1.19744e+06	2.32109e+06	6.16611e+06	7.86233e+06	4.5064e+06	2.96551e+06	5.54276e+06	1.53421e+06	1.31303e+06	7.3519e+06	4.65528e+06	5.02458e+06	54.11	1.56113e+06	1.38105e+06	37.24	2.98	1.58	0.0104118	1.98	0.0771942	1.70041	303.231	743.8	12.4	Up
M303T754	4.13004e+06	2.19309e+07	5.8612e+06	1.18015e+07	7.53323e+06	1.10079e+07	1.23875e+07	7.12446e+06	1.57251e+07	2.44592e+07	2.20169e+07	9.1855e+06	2.69809e+07	9.92643e+06	7.73643e+06	2.32374e+07	1.74085e+07	1.8871e+07	44.31	1.02221e+07	9.27055e+06	54.57	1.7	0.77	0.0498834	1.3	0.201689	1.20594	303.272	754.3	12.6	Up
M303T77	1.83099e+06	2.01553e+06	2.12702e+06	2.33549e+06	2.11834e+06	2.1851e+06	2.32552e+06	2.03815e+06	2.54608e+06	3.09319e+06	2.59213e+06	2.4439e+06	2.34288e+06	2.4618e+06	2.4643e+06	2.27655e+06	2.5276e+06	2.46305e+06	9.88	2.12202e+06	2.12268e+06	7.85	1.19	0.25	0.000621601	3.21	0.0140919	1.82368	303.241	77.3	1.3	Up
M304T102	516983	435371	437932	501182	442098	460109	519055	546521	680816	464350	563040	681376	717183	749791	604550	825299	660801	681096	17.19	482406	480646	9.04	1.37	0.45	0.0018648	2.73	0.0275628	1.85899	304.113	101.7	1.7	Up
M304T186	240015	300439	293087	392138	476714	246181	278883	248085	1.0574e+06	2.45021e+06	1.43317e+06	372272	1.03671e+06	652958	1.36488e+06	1.23903e+06	1.20083e+06	1.14821e+06	51.5	309443	285985	26.95	3.88	1.96	0.000621601	3.21	0.0140919	2.10766	304.059	185.6	3.1	Up
M304T407	265289	829073	244639	554801	1.13407e+06	354417	561377	336699	1.13364e+06	1.34717e+06	2.65831e+06	712594	748970	424481	1.19904e+06	1.08721e+06	1.16393e+06	1.11043e+06	58.07	535046	454609	58.06	2.18	1.12	0.0206682	1.68	0.117429	1.52925	304.12	407.1	6.8	Up
M304T608	5.40625e+06	1.99995e+06	2.48042e+06	1.40629e+06	1.98502e+06	4.53135e+06	2.87317e+06	4.27917e+06	954438	989927	490529	1.95568e+06	1.13965e+06	1.19883e+06	460258	3.81741e+06	1.37584e+06	1.06479e+06	79.3	3.1202e+06	2.6768e+06	46.15	0.44	-1.18	0.004662	2.33	0.0475536	1.62366	304.284	607.9	10.1	Down
M304T639	233470	92255.3	214896	262761	375396	313523	163566	297183	356478	561416	439943	267977	405337	294952	423655	502499	406532	414496	24.38	244131	248116	36.55	1.67	0.74	0.00699301	2.16	0.0602244	1.65281	304.121	639.5	10.7	Up
M304T694	120311	29446.4	106330	190943	120784	157715	28748.3	91990	159010	96141.6	230341	203702	131810	361638	194458	448394	228187	199080	52.26	105783	113320	53.4	2.16	1.11	0.0104118	1.98	0.0771942	1.47805	304.211	694.4	11.6	Up
M304T728	366272	443118	558711	535048	730240	352776	719009	257406	929456	1.83153e+06	2.30507e+06	964572	616025	711609	656296	397295	1.05148e+06	820533	63.2	495323	489083	34.73	2.12	1.09	0.0281274	1.55	0.141969	1.45887	304.263	727.8	12.1	Up
M304T749_2	2.36729e+06	939876	1.75324e+06	1.75696e+06	1.51135e+06	2.64903e+06	1.82997e+06	1.39841e+06	763895	510628	1.05459e+06	1.00178e+06	613950	2.44136e+06	1.15355e+06	399453	992401	882838	64.95	1.77577e+06	1.7551e+06	30.31	0.56	-0.84	0.0206682	1.68	0.117429	1.54178	304.222	748.8	12.5	Down
M304T765	1.10251e+08	1.40571e+07	2.51454e+07	1.10909e+08	5.05012e+07	9.5636e+07	3.09919e+07	1.88362e+07	6.53946e+06	1.62411e+07	4.88726e+07	1.948e+07	6.17294e+06	6.58257e+07	9.42385e+06	1.03246e+07	2.286e+07	1.32829e+07	97.26	5.7041e+07	4.07466e+07	73.39	0.4	-1.32	0.0379176	1.42	0.171246	1.31284	304.284	765.2	12.8	Down
M305T529	78962.9	2.01983e+06	76893.6	173770	44192.6	90565.7	89046.3	199556	127824	247228	3.2892e+06	1.62682e+06	246356	220746	141308	780136	834953	246792	133.55	346602	89806	195.65	2.41	1.27	0.0281274	1.55	0.141969	1.06957	305.214	529.2	8.8	Up
M305T615	8511.81	65968.8	76873.3	85026.1	67836.4	14780.7	82225.3	91879	231937	391422	257961	81990.4	104205	133493	209201	223319	204191	216260	48.64	61637.7	72354.8	52.01	3.31	1.73	0.0010878	2.96	0.0203124	1.73796	305.095	615.4	10.3	Up
M305T725	798341	1.24317e+06	1.41202e+06	1.24272e+06	1.62896e+06	1.4501e+06	1.2942e+06	984824	476637	386554	304713	681384	750029	1.51057e+06	975970	299898	673219	579010	61.37	1256792	1.26868e+06	20.96	0.54	-0.9	0.0104118	1.98	0.0771942	1.68233	305.196	725	12.1	Down
M305T765	2.90766e+07	4.78218e+06	2.41856e+06	3.21557e+07	1.28672e+07	1.46435e+07	3.20673e+06	2.8675e+06	2.37009e+06	1.06493e+06	1.44607e+07	1.08802e+06	789124	2.14889e+07	1.12197e+06	1.43613e+06	5.47749e+06	1.27905e+06	145.19	1.27522e+07	8.82468e+06	93.99	0.43	-1.22	0.0281274	1.55	0.141969	1.21338	305.287	765.2	12.8	Down
M305T78	1.15006e+06	1.40929e+06	1.40722e+06	1.40219e+06	1.46251e+06	1.6172e+06	1.32141e+06	1.51042e+06	1.66743e+06	1.49815e+06	1.41404e+06	1.43184e+06	1.69917e+06	1.57273e+06	1.54956e+06	2.38988e+06	1.65285e+06	1.56114e+06	19.03	1.41004e+06	1.40825e+06	9.71	1.17	0.23	0.0206682	1.68	0.117429	1.24851	304.893	77.8	1.3	Up
M306T321	169298	284524	299645	227870	268284	256418	266992	324267	369961	394096	431295	342089	409079	270073	314049	376173	363352	373067	14.51	262162	267638	18.04	1.39	0.47	0.0018648	2.73	0.0275628	1.78132	305.583	321.2	5.4	Up
M306T529	134141	245372	274681	164096	345548	293340	215436	248945	80772.8	67373.4	164378	138999	36737.5	217541	163543	14845	110524	109886	64.27	240195	247158	28.53	0.46	-1.12	0.00699301	2.16	0.0602244	1.5249	306.218	529.2	8.8	Down
M306T677	201655	148247	226050	121307	186230	341406	521009	190221	210460	119366	66267	144118	190255	80959.4	30884.5	154523	124604	131742	49.91	242016	195938	53.82	0.51	-0.96	0.0379176	1.42	0.171246	1.41944	306.216	676.9	11.3	Down
M306T686	81886.1	75501.3	75542.7	158097	22187.2	65986.6	77031.3	136316	186028	217591	156588	178844	194952	89789.3	177179	189006	173747	182436	21.9	86568.6	76287	48.85	2.01	1.01	0.0010878	2.96	0.0203124	1.67527	306.264	686.2	11.4	Up
M306T766	406295	540380	232847	626038	149406	140014	539984	603764	726983	829479	694461	645877	478947	417235	655038	690428	642306	672733	20.78	404841	473140	50.29	1.59	0.67	0.0104118	1.98	0.0771942	1.3535	306.291	765.5	12.8	Up
M306T82	1.43372e+06	1.27422e+06	1.13704e+06	1.34182e+06	1.60949e+06	1.62474e+06	1.46518e+06	1.39539e+06	1.58436e+06	1.62986e+06	1.50762e+06	1.5164e+06	1.54542e+06	1.70494e+06	1.65873e+06	1.65866e+06	1.60075e+06	1.60711e+06	4.57	1.4102e+06	1.41456e+06	11.6	1.14	0.18	0.0104118	1.98	0.0771942	1.57344	306.119	82.5	1.4	Up
M306T839	3.46173e+06	1.69645e+06	7.07235e+06	2.88514e+06	1.78109e+06	2.944e+06	4.35667e+06	3.11379e+06	5.99948e+06	4.76568e+06	9.12776e+06	4.27461e+06	5.80022e+06	9.83939e+06	5.26461e+06	1.05265e+07	6.94978e+06	5.89985e+06	35.61	3.4139e+06	3.02889e+06	50.1	2.04	1.03	0.004662	2.33	0.0475536	1.7501	306.243	838.6	14	Up
M306T92	9.94852e+06	1.14355e+07	1.04693e+07	1.04248e+07	1.20724e+07	9.89611e+06	7.99745e+06	1.0357e+07	1.08719e+07	1.32919e+07	1.27814e+07	1.16856e+07	1.22728e+07	1.05695e+07	1.08869e+07	1.00363e+07	1.15495e+07	1.12862e+07	9.95	1.03251e+07	1.03909e+07	11.61	1.12	0.16	0.0379176	1.42	0.171246	1.22094	306.093	92.1	1.5	Up
M307T188	1.54739e+06	1.07516e+06	1.47008e+06	1.45838e+06	1.24736e+06	878165	1.39902e+06	1.2798e+06	1.33082e+06	31453.6	1.4054e+06	784178	904217	662681	552553	220250	736445	723429	65.6	1.29442e+06	1.33941e+06	17.43	0.57	-0.81	0.0206682	1.68	0.117429	1.23599	307.043	188.3	3.1	Down
M307T317	1.33479e+06	1.51134e+06	1.45735e+06	1.20892e+06	1.47122e+06	3.31092e+06	1.3893e+06	1.86569e+06	4.32107e+06	8.59733e+06	6.50309e+06	3.87102e+06	8.18644e+06	7.97005e+06	1.24923e+07	5.83697e+06	7.22229e+06	7.23657e+06	38.18	1.69369e+06	1.46429e+06	40.17	4.26	2.09	0.0001554	3.81	0.00610078	2.28647	307.081	317.2	5.3	Up
M307T739	1.00134e+06	746020	970017	585923	588870	298596	763114	1.02952e+06	1.1484e+06	1.24597e+06	867038	1.67605e+06	992855	1.09507e+06	794418	614895	1.05434e+06	1.04396e+06	30.7	747926	754567	33.77	1.41	0.5	0.0498834	1.3	0.201689	1.18002	307.241	739.5	12.3	Up
M308T114_3	289015	501344	588439	236230	456734	494794	614466	562809	696187	533708	648759	736187	592095	613968	513028	627156	620136	620562	12.17	467979	498069	29.42	1.33	0.41	0.0104118	1.98	0.0771942	1.38587	308.491	114	1.9	Up
M308T375	115169	93134.2	76615.7	64045.3	71867.5	68912.6	100155	91646.3	130992	186544	129325	130147	131745	99464.3	99676	165299	134149	130570	22.12	85193.2	84131	20.76	1.57	0.66	0.0018648	2.73	0.0275628	1.86426	307.988	375	6.2	Up
M308T454	224580	96614.8	336960	185915	270398	266938	353260	301931	722915	585344	765636	716012	761057	647713	624644	672700	687003	694356	9.49	254575	268668	33.11	2.7	1.43	0.0001554	3.81	0.00610078	2.22185	307.978	454	7.6	Up
M308T627	416256	367458	567181	111506	562182	562442	403872	391404	88650.5	65869.4	101829	139516	68663	508972	403630	39253.5	177048	95239.6	100.02	422788	410064	35.88	0.42	-1.26	0.014763	1.83	0.0952789	1.57121	308.221	626.7	10.4	Down
M309T114	8299.91	8639.03	20359.5	67604.9	8582.54	7153.51	14883.5	4885.47	170951	432370	146773	14955.5	172610	361798	587591	548346	304424	267204	68.36	17551	8610.78	118.63	17.35	4.12	0.000621601	3.21	0.0140919	2.05472	308.99	114	1.9	Up
M309T619	4.57644e+06	2.13352e+06	1.01937e+07	2.93965e+06	8.57953e+06	1.29325e+07	2.93187e+06	3.94212e+06	932947	1.21996e+06	1.34422e+06	2.72449e+06	1.1052e+06	5.17018e+06	4.16983e+06	1.09914e+06	2.22075e+06	1.28209e+06	73.56	6.02867e+06	4.25928e+06	66.43	0.37	-1.44	0.0206682	1.68	0.117429	1.53933	309.23	619.2	10.3	Down
M309T72_2	2.12794e+06	2.86042e+06	2.61238e+06	3.38006e+06	2.64995e+06	2.72271e+06	3.14373e+06	3.54883e+06	4.1657e+06	6.00405e+06	6.13611e+06	4.61955e+06	5.34837e+06	3.77579e+06	3.95547e+06	4.88181e+06	4.86086e+06	4.75068e+06	18.58	2.88075e+06	2.79156e+06	15.97	1.69	0.75	0.0001554	3.81	0.00610078	2.12049	309.066	71.8	1.2	Up
M309T76	6.18759e+06	6.3382e+06	6.35232e+06	7.89022e+06	4.46781e+06	4.16603e+06	6.31419e+06	9.0735e+06	1.17896e+07	5.41825e+06	8.77518e+06	8.31184e+06	1.23949e+07	1.01461e+07	8.2215e+06	1.44256e+07	9.93538e+06	9.46063e+06	28.73	6.34873e+06	6.32619e+06	25.35	1.56	0.65	0.014763	1.83	0.0952789	1.56635	309.165	76.5	1.3	Up
M309T85	909280	2.82269e+06	3.06745e+06	820975	7.37531e+06	9.53299e+06	2.62309e+06	7.02049e+06	8.69587e+06	2.82358e+06	9.60887e+06	1.0617e+07	8.10923e+06	3.20066e+06	8.66904e+06	9.63812e+06	7.6703e+06	8.68246e+06	38.81	4271536	2.94507e+06	76.3	1.8	0.84	0.0206682	1.68	0.117429	1.29112	309.087	85.2	1.4	Up
M309T89	4.58331e+08	2.37979e+08	1.72492e+08	5.20973e+08	2.38249e+08	2.75865e+08	9.38146e+07	7.76718e+07	1.64422e+08	1.62645e+08	1.0399e+08	1.06294e+08	8.32945e+07	8.16752e+07	7.88141e+07	9.93588e+07	1.10062e+08	1.01675e+08	31.44	2.59422e+08	2.38114e+08	61.32	0.42	-1.24	0.0498834	1.3	0.201689	1.51285	309.128	89.3	1.5	Down
M310T321	1.42668e+06	459843	947255	4.93961e+06	1.05772e+06	3.5728e+06	1.96819e+06	5.41448e+06	6.75127e+06	1.35575e+07	6.89377e+06	5.92838e+06	1.46268e+06	7.8929e+06	9.46578e+06	2.84246e+06	6.84934e+06	6.82252e+06	54.87	2.47332e+06	1.69744e+06	77.44	2.77	1.47	0.00699301	2.16	0.0602244	1.55675	310.175	321.4	5.4	Up
M310T559	1.72814e+06	2.55087e+06	3.27514e+06	1.49509e+06	2.02645e+06	4.73156e+06	2.59155e+06	2.62747e+06	765769	230866	1.22033e+06	1.67928e+06	744224	3.03691e+06	2.3112e+06	173668	1.27028e+06	993052	79.78	2.62828e+06	2.57121e+06	38.87	0.48	-1.05	0.0206682	1.68	0.117429	1.44204	310.147	558.7	9.3	Down
M310T762	1.12376e+07	5.15384e+06	6.55356e+06	5.40673e+06	4.64918e+06	4.59939e+06	6.71805e+06	9.90651e+06	1.71886e+07	1.03425e+07	1.26538e+07	3.34497e+07	1.23148e+07	1.04428e+07	6.7878e+06	6.32229e+06	1.36878e+07	1.13788e+07	63.53	6.77811e+06	5.98014e+06	36.79	2.02	1.01	0.0104118	1.98	0.0771942	1.48394	310.271	761.8	12.7	Up
M310T79	159810	30940.2	55893.2	25780.6	105983	84705.6	36501.4	31870.4	941358	1.39276e+06	164069	480446	875416	171988	159332	1.03483e+06	652526	677931	72.57	66435.5	46197.3	71.36	9.82	3.3	0.0003108	3.51	0.00894927	2.03992	310.207	78.9	1.3	Up
M311T101	372262	412333	387546	458079	602622	262446	691754	559382	708910	4.68305e+06	1.20376e+06	1.55258e+06	940913	417895	849563	432605	1.34866e+06	895238	103.77	468303	435206	29.94	2.88	1.53	0.0104118	1.98	0.0771942	1.46225	311.09	101.3	1.7	Up
M311T114	6.47899e+06	8.78136e+06	7.14645e+06	6.26853e+06	2.76309e+06	3.72079e+06	6.19756e+06	5.65934e+06	4.70933e+06	4.79353e+06	2.57262e+06	4.01905e+06	3.73208e+06	4.9697e+06	3.34017e+06	5.4257e+06	4.19527e+06	4.36419e+06	22.69	5.87702e+06	6.23305e+06	32.19	0.71	-0.49	0.0498834	1.3	0.201689	1.22247	310.97	114.3	1.9	Down
M311T379	1.23884e+06	548564	828255	642661	1.03554e+06	668628	1.81679e+06	1.20837e+06	393413	961058	1.00812e+06	578016	532183	522898	491551	831308	664819	555099	35.15	998456	931897	42.15	0.67	-0.59	0.0498834	1.3	0.201689	1.14936	311.126	379.4	6.3	Down
M311T559	352394	352570	366915	303126	93096.8	30270	309324	344027	664922	391605	427829	319158	570467	412425	377913	391849	444521	402137	25.72	268965	326675	48.65	1.65	0.72	0.0018648	2.73	0.0275628	1.20728	311.15	558.7	9.3	Up
M311T669	495198	318423	249093	265825	83300.4	40102.2	374740	387604	478964	485068	374547	397956	525781	487087	439842	261962	431401	459403	19.65	276786	292124	55.58	1.56	0.64	0.0498834	1.3	0.201689	1.19132	311.305	669.1	11.2	Up
M311T92	4.90965e+06	5.41212e+06	5.23199e+06	5.22855e+06	6.96217e+06	6.54401e+06	5.11758e+06	8.02764e+06	8.18649e+06	6.8376e+06	6.73239e+06	6.93044e+06	7.72839e+06	7.53411e+06	1.0217e+07	6.77497e+06	7.61768e+06	7.23228e+06	15.43	5.92921e+06	5.32206e+06	18.9	1.28	0.36	0.0206682	1.68	0.117429	1.67257	311.116	92	1.5	Up
M312T388	162923	17575.2	37089.1	38061.7	156717	26488.3	202356	23939.7	588324	493535	753217	430966	712572	522322	448577	609118	569829	555323	20.76	83143.6	37575.4	92.22	6.85	2.78	0.0001554	3.81	0.00610078	2.16984	312.144	388.1	6.5	Up
M312T441	1.32824e+06	637012	1.84055e+06	63005.5	1.91222e+06	1.23985e+06	548533	962011	826020	760255	57072.5	541484	114231	685175	346412	205543	442024	443948	68.32	1.06643e+06	1.10093e+06	60.19	0.41	-1.27	0.0498834	1.3	0.201689	1.00102	312.201	441	7.3	Down
M313T117_2	2.59839e+06	1.80162e+06	2.84738e+06	2.4959e+06	275145	1.38791e+06	3.8005e+06	3.2967e+06	159043	701130	1.16651e+06	1.02958e+06	1.32666e+06	498518	626939	1.05418e+06	820321	865357	47.6	2.31294e+06	2.54715e+06	48.62	0.35	-1.5	0.00699301	2.16	0.0602244	1.42096	313.1	117.1	2	Down
M313T442	147708	101784	103621	87191.8	57323.1	49955.8	176878	149450	61213.8	4889.91	31189.5	97233.9	60747.2	95238.6	4882.43	8406.12	45475.2	45968.3	85.21	109239	102702	41.6	0.42	-1.26	0.0206682	1.68	0.117429	1.50492	313.24	442.3	7.4	Down
M313T80	8.03974e+06	6.94489e+06	8.21396e+06	6.40507e+06	7.06234e+06	4.17294e+06	1.07511e+07	7.78264e+06	5.78899e+06	2.9562e+06	5.07426e+06	8.37243e+06	4.96874e+06	4.98833e+06	3.05836e+06	4.12955e+06	4.91711e+06	4.97854e+06	34.93	7.42158e+06	7.42249e+06	25.04	0.66	-0.59	0.0281274	1.55	0.141969	1.5206	312.913	79.9	1.3	Down
M313T821	60288.3	2.44122e+06	90273.4	18897.8	931615	69000.4	2.71727e+06	93185.8	1.32617e+07	1.50114e+07	1.42819e+07	20453.9	8.25378e+06	7.54882e+06	1.65242e+07	1.761e+07	1.1564e+07	1.37718e+07	51.02	802719	91729.6	141.9	14.41	3.85	0.00699301	2.16	0.0602244	1.60388	313.134	821.5	13.7	Up
M313T822	8.94558e+06	1.04363e+07	9.54005e+06	1.49009e+07	810566	4.76709e+06	1.10125e+07	1.0386e+07	4.33845e+07	5.88969e+07	4.8833e+07	1.00185e+07	3.33871e+07	2.63578e+07	4.70524e+07	6.1779e+07	4.12137e+07	4.52184e+07	41.9	8.84987e+06	9.96305e+06	48.31	4.66	2.22	0.0018648	2.73	0.0275628	1.84249	312.633	821.6	13.7	Up
M314T104	425419	628589	514709	563897	462613	455438	392841	235995	359012	307818	400868	352183	211987	274617	507349	302069	339488	330001	26.19	459938	459025	25.74	0.74	-0.44	0.0379176	1.42	0.171246	1.27858	314.083	104.5	1.7	Down
M314T114	7.00192e+06	6.58178e+06	4.52973e+06	1.36824e+07	9.24928e+06	7.26387e+06	4.77296e+06	4.6606e+06	4.13221e+06	3.96692e+06	6.69353e+06	3.21948e+06	2.07267e+06	7.57659e+06	3.27018e+06	4.39948e+06	4.41638e+06	4.04957e+06	41.66	7.21782e+06	6.79185e+06	42.58	0.61	-0.71	0.0206682	1.68	0.117429	1.3921	313.968	114.3	1.9	Down
M314T122	1.37194e+06	2.7829e+06	1.87094e+06	2.58341e+06	2.41494e+06	6.19799e+06	1.04897e+07	2.50322e+06	1.9084e+07	1.7277e+07	1.97942e+07	1.85015e+06	1.70889e+07	2.09086e+06	1.58826e+07	1.69309e+07	1.37498e+07	1.70099e+07	53.64	3.77688e+06	2.54331e+06	81.44	3.64	1.86	0.0498834	1.3	0.201689	1.51019	314.09	122.2	2	Up
M314T180	7.56113e+07	9.81508e+07	1.68078e+08	6.72686e+07	2.58319e+08	3.24484e+08	1.26379e+08	1.00684e+08	4.39101e+07	3.05547e+07	6.58066e+07	7.22256e+07	4.87308e+07	9.40419e+07	8.53167e+07	6.59499e+06	5.58977e+07	5.72687e+07	52.17	1.52372e+08	1.13531e+08	61.02	0.37	-1.45	0.0029526	2.53	0.0361958	1.51104	314.145	179.5	3	Down
M314T280	1.52131e+08	1.7018e+08	2.20358e+08	1.32337e+08	2.36442e+08	2.17277e+08	1.55823e+08	1.38495e+08	1.07756e+08	1.16564e+08	1.35108e+08	1.30737e+08	1.26248e+08	1.60969e+08	1.88755e+08	7.03422e+07	1.2956e+08	1.28493e+08	27.19	1.7788e+08	1.63001e+08	22.91	0.73	-0.46	0.0206682	1.68	0.117429	1.36026	314.145	280	4.7	Down
M314T314	765295	193008	675736	549097	6.34478e+06	341610	3.3644e+06	3.02453e+06	6.47533e+06	6.28176e+06	1.14342e+07	5.91692e+06	6.77915e+06	5.19325e+06	4.54821e+06	6.97237e+06	6.70014e+06	6.37854e+06	31.02	1.90731e+06	720516	114.04	3.51	1.81	0.0018648	2.73	0.0275628	1.90351	314.145	313.7	5.2	Up
M314T317	193510	314432	303934	225405	26634.1	249095	317588	364931	425201	373499	413226	397610	453132	279259	295475	361904	374913	385554	16.34	249441	276515	42.46	1.5	0.59	0.014763	1.83	0.0952789	1.0954	314.09	317.4	5.3	Up
M314T505	622418	1.16231e+06	533268	821975	263811	502184	282268	890070	1.45422e+06	1.22249e+06	1.23437e+06	826269	1.06326e+06	1.0113e+06	820246	1.1763e+06	1.10106e+06	1.11978e+06	19.62	634788	577843	48.68	1.73	0.79	0.00699301	2.16	0.0602244	1.59846	314.175	505.3	8.4	Up
M314T691	1.10488e+06	1.34439e+06	984056	540618	1.19465e+06	825856	852423	644987	160384	84436.3	215869	786512	513362	832299	332760	73219.3	374855	274314	81.06	936482	918240	29.23	0.4	-1.32	0.0029526	2.53	0.0361958	1.70302	314.231	691.5	11.5	Down
M314T703	6.8566e+06	1.27252e+07	1.18057e+07	5.17581e+06	5.63971e+06	5.18186e+06	4.66477e+06	1.54612e+07	9.68523e+06	1.70333e+07	2.03068e+07	2.24352e+07	2.32091e+07	7.67627e+06	1.41967e+07	1.63044e+07	1.63559e+07	1.66688e+07	34.62	8.43886e+06	6.24815e+06	50.05	1.94	0.95	0.00699301	2.16	0.0602244	1.63035	314.232	703	11.7	Up
M314T759	1.27425e+06	2.19803e+06	1.41685e+06	750794	3.12842e+06	3.47174e+06	2.11615e+06	1.66857e+06	689561	950831	1.03013e+06	1.19596e+06	1.13121e+06	1.32635e+06	1.44228e+06	1.20552e+06	1.12148e+06	1.16358e+06	20.82	2.0031e+06	1.89236e+06	46.33	0.56	-0.84	0.0206682	1.68	0.117429	1.37452	314.231	759.3	12.7	Down
M314T821	38493	1.18246e+06	84645.9	1.79475e+06	488672	64686.6	1.12093e+06	87376.8	4.05566e+06	7.66265e+06	4.61198e+06	19178.8	2.04133e+06	2.61265e+06	5.43515e+06	5.92408e+06	4.04534e+06	4.33382e+06	59.93	607752	288025	110.9	6.66	2.73	0.0104118	1.98	0.0771942	1.33294	314.132	821.5	13.7	Up
M315T179	1.1648e+07	1.55819e+07	3.17908e+07	2.31295e+06	3.08738e+07	2.23898e+07	3.3204e+07	1.9122e+07	9.65616e+06	1.18022e+07	900105	1.25009e+07	9.51107e+06	2.53464e+07	958120	1.16813e+07	1.02945e+07	1.06687e+07	74.53	2.08654e+07	2.07559e+07	52.32	0.49	-1.02	0.0498834	1.3	0.201689	1.05166	315.149	179	3	Down
M315T280_1	432531	647019	443905	413642	707806	1.28824e+06	567271	1.12715e+06	938494	3.12665e+06	803610	1.49928e+07	2.78974e+06	2.17729e+06	2.94487e+06	2.8524e+06	3.82823e+06	2.82107e+06	120.18	703445	607145	47.09	5.44	2.44	0.0018648	2.73	0.0275628	1.80869	315.093	279.6	4.7	Up
M315T318	45270	47699.4	48984.1	44803.2	44819.2	52247.1	54458.1	51509.3	385104	708595	807864	86445.1	219106	480842	960146	604219	531540	542530	55.83	48723.8	48341.8	7.63	10.91	3.45	0.0001554	3.81	0.00610078	2.255	315.077	317.7	5.3	Up
M315T356_1	1.39e+06	531802	1.82226e+06	188068	1.91663e+06	1.18036e+06	1.78619e+06	1.66736e+06	673503	608780	297896	485095	504329	750707	370571	419997	513860	494712	30.1	1.31033e+06	1.52868e+06	48.89	0.39	-1.35	0.0281274	1.55	0.141969	1.33982	315.039	356.5	5.9	Down
M315T363	285630	301709	375562	278515	426836	556071	334574	324596	202916	159406	246486	292265	197085	356059	344254	142364	242604	224701	33.52	360437	329585	25.82	0.67	-0.57	0.0379176	1.42	0.171246	1.48583	315.103	363.4	6.1	Down
M315T378	756132	339560	317359	731904	248993	360216	345381	256559	232811	43601.5	237192	580485	234396	599228	210581	145311	285451	233604	69.68	419513	342470	48.72	0.68	-0.56	0.0379176	1.42	0.171246	1.04727	315.108	377.7	6.3	Down
M315T416	281504	859215	850161	432628	1.54287e+06	1.77957e+06	1.37197e+06	3.29472e+06	1.36066e+06	4.24587e+06	1.071e+06	2.27775e+06	2.95031e+06	1.97898e+06	2.76505e+06	5.4133e+06	2.75787e+06	2.5214e+06	52.97	1.30158e+06	1.11559e+06	73.8	2.12	1.08	0.0379176	1.42	0.171246	1.45969	315.204	416	6.9	Up
M315T434	477945	527980	615600	1.11034e+06	556123	431739	825673	1.66913e+06	1.51043e+06	7.04054e+06	944734	1.05585e+06	976676	2.55635e+06	2.58103e+06	2.95535e+06	2.45262e+06	2.03339e+06	82.44	776816	585861	54.5	3.16	1.66	0.00699301	2.16	0.0602244	1.70347	315.203	433.7	7.2	Up
M315T645	1.71682e+06	822518	1.32092e+06	1.992e+06	2.34085e+06	1.54392e+06	1.2359e+06	2.40193e+06	2.94056e+06	2.54895e+06	1.83644e+06	3.12694e+06	2.12433e+06	3.36206e+06	2.03664e+06	2.56474e+06	2.56758e+06	2.55685e+06	21.31	1.67186e+06	1.63037e+06	33.04	1.54	0.62	0.00699301	2.16	0.0602244	1.63002	315.134	644.6	10.7	Up
M315T703	1.16132e+06	2.10617e+06	2.38184e+06	1.98278e+06	1.58083e+06	1.7579e+06	2.03631e+06	1.95882e+06	3.18892e+06	2.81839e+06	3.84059e+06	2.72874e+06	4.39064e+06	2.298e+06	1.8224e+06	3.23209e+06	3.03997e+06	3.00366e+06	26.96	1.87075e+06	1.9708e+06	19.84	1.63	0.7	0.004662	2.33	0.0475536	1.74731	315.235	703	11.7	Up
M315T805	1.98563e+07	1.12735e+07	2.04962e+07	2.46479e+07	6.4827e+06	7.51398e+06	6.17687e+06	4.562e+06	2.16269e+07	1.51274e+07	2.62404e+07	2.26489e+07	2.21565e+07	1.31801e+07	1.25219e+07	3.34226e+07	2.08656e+07	2.18917e+07	34.06	1.26262e+07	9.39376e+06	62.15	1.65	0.72	0.0379176	1.42	0.171246	1.29629	315.308	805.1	13.4	Up
M316T113	3.36331e+06	6.42133e+06	4.54135e+06	9.48279e+06	2.5567e+06	3.38441e+06	3.02173e+06	4.85992e+06	1.75537e+06	1.94508e+06	1.86788e+06	1.41176e+06	1.4464e+06	1.58026e+06	1.57126e+06	1.42807e+06	1.62576e+06	1.57576e+06	12.72	4.70394e+06	3.96288e+06	48.75	0.35	-1.53	0.0001554	3.81	0.00610078	2.15117	315.996	113.5	1.9	Down
M316T356	890775	933409	833650	855784	933773	802872	892355	904926	988345	943837	931639	967324	945804	937516	950416	890213	944387	944821	3.01	880943	891565	5.31	1.07	0.1	0.00699301	2.16	0.0602244	1.62651	316.067	356.4	5.9	Up
M316T592	249702	107663	251900	250700	212452	145999	243222	208594	117771	81244.7	172335	164741	142823	171651	72066.9	212339	141871	153782	34.15	208779	227837	26.02	0.68	-0.56	0.0281274	1.55	0.141969	1.31427	316.137	592.3	9.9	Down
M316T615	133251	231177	236470	208455	50431	33802.2	306206	263336	248345	246327	314668	241198	273441	238187	254462	288297	263116	251403	10.23	182891	219816	54.59	1.44	0.52	0.0379176	1.42	0.171246	1.14087	316.137	615.1	10.3	Up
M316T768	2.21382e+07	7.01761e+06	2.84293e+07	2.9771e+07	9.58615e+06	1.32582e+07	1.54732e+07	4.00348e+07	4.53161e+07	5.89011e+07	4.31841e+07	5.42006e+07	5.81043e+07	4.04794e+07	3.89694e+07	4.53476e+07	4.80628e+07	4.53319e+07	16.4	2.07136e+07	1.88057e+07	55.09	2.32	1.21	0.0003108	3.51	0.00894927	1.92402	316.284	767.7	12.8	Up
M316T793_2	4.42702e+09	5.87425e+09	6.47528e+09	4.51313e+09	7.35454e+09	9.16439e+09	5.20557e+09	6.33083e+09	1.68254e+09	4.35694e+08	2.44671e+09	4.32177e+09	8.50624e+08	7.18413e+09	6.23245e+09	2.03194e+08	2.91964e+09	2.06463e+09	92.19	6.16813e+09	6.10254e+09	25.48	0.47	-1.08	0.0206682	1.68	0.117429	1.4608	316.323	793.1	13.2	Down
M316T91	299815	570174	393924	349004	485401	584674	709681	442622	709732	1.74939e+06	1.4673e+06	467621	1.42395e+06	1.44541e+06	1.212e+06	1.14514e+06	1.20257e+06	1.31798e+06	35.33	479412	464011	28.46	2.51	1.33	0.0018648	2.73	0.0275628	1.96945	316.079	91	1.5	Up
M317T690	125075	60313.9	360084	305172	353380	314849	98764	247970	254131	752664	435098	253326	441681	469877	788730	401724	474654	438389	42.25	233201	276571	51.83	2.04	1.03	0.0104118	1.98	0.0771942	1.56301	317.279	689.9	11.5	Up
M317T699	4.00992e+06	1.49086e+06	2.99243e+06	303972	3.10287e+06	1.72336e+06	2.65518e+06	2.43099e+06	789506	2.64972e+06	448376	741241	788586	1.41783e+06	463584	1.4357e+06	1.09182e+06	789046	67.18	2.3387e+06	2.54308e+06	48.89	0.47	-1.1	0.0281274	1.55	0.141969	1.1749	317.21	698.6	11.6	Down
M317T768	6.94028e+06	4.18597e+06	1.9148e+06	9.26208e+06	1.5639e+06	2.44171e+06	6.28651e+06	6.77169e+06	9.71535e+06	9.02456e+06	6.21596e+06	8.97767e+06	1.61428e+07	8.62716e+06	6.12186e+06	1.34665e+07	9.78648e+06	9.00111e+06	35.12	4.92087e+06	5.23624e+06	57.07	1.99	0.99	0.0281274	1.55	0.141969	1.54689	317.288	767.7	12.8	Up
M317T774	6.31138e+06	7.16326e+06	7.21282e+06	4.71123e+06	3.80968e+06	5.16621e+06	1.09023e+07	8.4002e+06	6.72494e+06	5.1882e+06	3.88211e+06	2.68857e+06	6.33954e+06	2.56292e+06	3.69268e+06	1.72161e+06	4.10007e+06	3.78739e+06	44.51	6.70963e+06	6.73732e+06	33.72	0.61	-0.71	0.0379176	1.42	0.171246	1.42372	317.287	773.9	12.9	Down
M317T784	3.73069e+08	4.70662e+08	5.87457e+08	3.61302e+08	6.40385e+08	8.52128e+08	5.38021e+08	3.21703e+08	2.10264e+08	1.6844e+08	2.08035e+08	2.16168e+08	1.38908e+08	3.72004e+08	5.16336e+08	4.05726e+07	2.33841e+08	2.09149e+08	62.82	5.18091e+08	5.04341e+08	34.08	0.45	-1.15	0.004662	2.33	0.0475536	1.62175	317.324	784.3	13.1	Down
M318T373	43901.1	121923	342872	86965.6	106805	151107	431034	153866	761657	2.80099e+06	590871	540956	821492	1.81461e+06	1.7953e+06	2.21706e+06	1.41787e+06	1.30839e+06	60.15	179809	136515	74.9	7.89	2.98	0.0001554	3.81	0.00610078	2.13216	317.605	373.1	6.2	Up
M318T416	512064	639151	718297	387868	436561	278240	415750	722176	367012	93285.1	244987	274767	122679	121977	87698.6	389811	212777	183833	57.91	513763	474313	31.89	0.41	-1.27	0.0010878	2.96	0.0203124	1.84104	317.613	415.7	6.9	Down
M318T440	929934	1.17628e+06	1.36074e+06	1.25402e+06	1.014e+06	1.45969e+06	1.05236e+06	757276	2.32253e+06	5.61218e+06	2.81854e+06	1.60061e+06	1.82589e+06	1.46813e+06	1.52683e+06	1.88485e+06	2.38245e+06	1.85537e+06	57.99	1.12554e+06	1.11432e+06	20.64	2.12	1.08	0.0001554	3.81	0.00610078	1.76362	318.217	439.7	7.3	Up
M318T613	529766	1.09784e+06	1.41092e+06	735655	1.40176e+06	945701	1.18297e+06	2.08804e+06	1.05766e+06	1.40318e+06	1.76209e+06	1.76228e+06	1.48514e+06	1.75379e+06	1.77316e+06	1.58887e+06	1.57327e+06	1.67133e+06	16.06	1.17408e+06	1.14041e+06	40.83	1.34	0.42	0.0498834	1.3	0.201689	1.31439	318.191	613.3	10.2	Up
M318T626	1.60728e+06	844419	855360	1.81154e+06	350106	335084	2.03967e+06	1.09305e+06	3.15486e+06	3.07622e+06	2.7747e+06	1.33127e+06	3.42772e+06	1.97743e+06	1.63103e+06	3.5287e+06	2.61274e+06	2.92546e+06	32.5	1.11706e+06	974206	57.79	2.34	1.23	0.004662	2.33	0.0475536	1.67649	318.214	626.3	10.4	Up
M318T744	2.1115e+08	8.65419e+07	7.9607e+07	3.79848e+08	9.82594e+07	1.3282e+08	1.05166e+08	1.6869e+08	2.59583e+08	4.96305e+08	2.20204e+08	3.30381e+08	5.01405e+08	1.38504e+08	1.59835e+08	3.01893e+08	3.01014e+08	2.80738e+08	45.92	1.5776e+08	1.18993e+08	63.57	1.91	0.93	0.0206682	1.68	0.117429	1.46126	318.299	743.8	12.4	Up
M318T793	1.15681e+08	2.36292e+08	2.63537e+08	1.98846e+08	3.02524e+08	3.47745e+08	9.0321e+07	9.10537e+07	9.12483e+07	1.97967e+08	7.27343e+07	8.45648e+07	1.14162e+08	1.19906e+08	7.62607e+07	1.83332e+08	1.17522e+08	1.02705e+08	41.07	2.0575e+08	2.17569e+08	48.06	0.57	-0.81	0.0498834	1.3	0.201689	1.26738	318.327	793.1	13.2	Down
M319T109	299707	249228	195107	253278	132129	96414.6	280937	312591	452544	475061	460419	407392	430364	237173	260180	441948	395635	436156	23.54	227424	251253	34.77	1.74	0.8	0.0104118	1.98	0.0771942	1.63306	319.06	108.8	1.8	Up
M319T213	139441	158189	233875	151036	167228	116133	176837	211261	328354	2.20328e+06	319576	168611	322127	1.55878e+06	1.63803e+06	857937	924587	593146	83.84	169250	162709	22.52	5.46	2.45	0.0010878	2.96	0.0203124	1.80827	319.095	212.6	3.5	Up
M319T719	44089.8	23255.8	76170.3	24419.7	21644.2	19375.3	36142.9	47433.3	25977.8	90308.9	60060.5	42930.5	58016.4	39329.7	50083.4	104923	58953.8	54049.9	44.91	36566.4	30281.3	52.57	1.61	0.69	0.0498834	1.3	0.201689	1.25739	319.267	719.4	12	Up
M319T82_2	351217	1.1988e+06	1.32997e+06	419423	1.23516e+06	964222	1.04766e+06	1.1239e+06	1.24462e+06	1.77866e+06	2.13155e+06	1.69453e+06	1.60188e+06	1.50948e+06	1.24008e+06	2.04716e+06	1.656e+06	1.64821e+06	19.93	958793	1.08578e+06	38.77	1.73	0.79	0.000621601	3.21	0.0140919	1.63738	318.876	81.7	1.4	Up
M319T99	783223	769207	730256	881210	598663	603687	714505	644372	710063	558805	691705	553551	501426	502260	513617	639698	583891	556178	14.56	715640	722381	13.61	0.82	-0.29	0.0104118	1.98	0.0771942	1.58946	318.514	98.8	1.6	Down
M320T109	3.55393e+06	3.71577e+06	3.29608e+06	3.97689e+06	3.07719e+06	2.76848e+06	3.39643e+06	3.48225e+06	3.88549e+06	3.78325e+06	4.94953e+06	4.53439e+06	3.30264e+06	4.62829e+06	4.45485e+06	4.02299e+06	4.19518e+06	4.23892e+06	12.84	3.40838e+06	3.43934e+06	10.96	1.23	0.3	0.00699301	2.16	0.0602244	1.64712	320.109	108.7	1.8	Up
M320T112	511383	365860	484472	517005	279328	313750	488230	411391	477177	517635	746911	870496	614721	696154	450168	682385	631956	648553	22.94	421427	447932	22.09	1.5	0.58	0.0104118	1.98	0.0771942	1.6618	320.145	112.3	1.9	Up
M320T356_1	222232	316229	273546	161385	415979	238816	909996	177319	1.55309e+06	1.28794e+06	1.56461e+06	1.13386e+06	1.50217e+06	1.20188e+06	1.21045e+06	1.5654e+06	1.37743e+06	1.39505e+06	13.52	339438	256181	72	4.06	2.02	0.0001554	3.81	0.00610078	2.23391	320.042	356.4	5.9	Up
M320T356_2	352731	667921	870178	960944	614378	411449	1.08956e+06	934453	2.09186e+06	5.92352e+06	2.04746e+06	1.18397e+06	2.69758e+06	4.61742e+06	4.32801e+06	5.08518e+06	3.49687e+06	3.5128e+06	48.84	737702	769050	36.4	4.74	2.24	0.0001554	3.81	0.00610078	2.12696	320.206	356.3	5.9	Up
M320T376	573740	402406	396461	927233	505075	293505	337725	406073	756774	462533	1.27414e+06	1.48496e+06	824470	357844	706816	1.04261e+06	863768	790622	44.64	480277	404240	41.86	1.8	0.85	0.0379176	1.42	0.171246	1.4059	320.127	376.3	6.3	Up
M320T440	118994	112483	76684.6	109054	81621.6	54355.4	168317	81966.9	158659	113676	127860	131116	188103	98719.8	202648	206511	153412	144888	27.21	100435	95510.4	34.81	1.53	0.61	0.014763	1.83	0.0952789	1.46929	320.123	439.6	7.3	Up
M320T711	344317	272249	503199	829552	483408	500074	331735	412621	1.11597e+06	948699	789933	880401	1.04121e+06	421436	394194	568125	769996	835167	36.11	459644	448014	37.5	1.68	0.74	0.0281274	1.55	0.141969	1.44328	320.189	710.9	11.8	Up
M320T744	2.62148e+06	5.04955e+06	6.69294e+06	2.27817e+06	1.88173e+06	5.42859e+06	3.37976e+06	2.57589e+06	8.03596e+06	5.26472e+06	4.77147e+06	1.26717e+07	6.08642e+06	5.56865e+06	1.18731e+07	6.97699e+06	7.65613e+06	6.5317e+06	39.62	3.73851e+06	3.00062e+06	47	2.05	1.03	0.00699301	2.16	0.0602244	1.69213	320.306	743.8	12.4	Up
M321T109	1.48839e+06	168856	270793	486144	598559	811827	458341	480289	79959	450151	300390	95931.8	46500.2	330933	230677	94696.3	203655	163305	72	595400	483217	68.83	0.34	-1.55	0.00699301	2.16	0.0602244	1.55042	321.112	108.8	1.8	Down
M321T112	235730	161880	191141	223020	139686	131082	185430	233202	310138	366799	296112	237766	365923	207533	252530	338838	296955	303125	20.14	187646	188286	21.9	1.58	0.66	0.0010878	2.96	0.0203124	1.86235	321.048	111.9	1.9	Up
M321T477	298006	645080	430298	1.03695e+06	1.39283e+06	439715	884117	462488	1.95454e+06	3.62807e+06	2.49174e+06	1.59486e+06	715858	680832	1.8826e+06	1.9733e+06	1.86523e+06	1.91857e+06	50.93	698685	553784	53.8	2.67	1.42	0.004662	2.33	0.0475536	1.71131	321.202	476.6	7.9	Up
M321T561	1.95092e+06	1.94715e+06	2.22209e+06	3.37849e+06	1.81352e+06	45764.2	2.41545e+06	2.66522e+06	1.30085e+07	2.73679e+07	2.0136e+07	4.74233e+06	1.14282e+07	4.01069e+06	2.9148e+07	1.17677e+07	1.52012e+07	1.23881e+07	62.52	2.05483e+06	2.08651e+06	46.53	7.4	2.89	0.0001554	3.81	0.00610078	1.79839	321.221	560.8	9.3	Up
M321T606	130511	257303	404444	116279	237264	298357	469178	420052	586012	466933	872297	916411	672422	528866	334573	506144	610457	557439	32.81	291673	277830	45.19	2.09	1.07	0.0018648	2.73	0.0275628	1.75375	321.181	606	10.1	Up
M321T725	2.20139e+06	2.17227e+06	2.09228e+06	2.17472e+06	1.42164e+06	1.97204e+06	1.48506e+06	1.41969e+06	1.29542e+06	598797	1.38273e+06	756482	1.26729e+06	463658	597946	824875	898400	790678	40.42	1.86739e+06	2.03216e+06	19.26	0.48	-1.06	0.0001554	3.81	0.00610078	1.99309	321.192	725.1	12.1	Down
M321T78	719125	726199	669401	515700	676091	1.11843e+06	740815	1.28639e+06	887176	1.62686e+06	1.31895e+06	838519	790129	1.17129e+06	1.31128e+06	704500	1.08109e+06	1.02923e+06	30.04	806520	722662	32	1.34	0.42	0.0379176	1.42	0.171246	1.23187	320.867	78.1	1.3	Up
M321T787	1.17784e+06	266219	893130	391711	219982	411046	919561	1.36643e+06	1.5722e+06	1.57536e+06	708485	1.33536e+06	1.46364e+06	1.627e+06	704768	1.20264e+06	1.27368e+06	1.3995e+06	29.57	705741	652088	62.34	1.8	0.85	0.0206682	1.68	0.117429	1.4568	321.242	787.2	13.1	Up
M322T375	448683	854007	554581	617244	666166	881091	1.02673e+06	795599	1.09055e+06	1.88128e+06	1.63909e+06	882847	906141	887865	1.26763e+06	1.63814e+06	1.27419e+06	1.17909e+06	31.19	730512	730883	26.24	1.74	0.8	0.0010878	2.96	0.0203124	1.77267	322.178	375.1	6.3	Up
M322T707	3.1369e+06	7.17192e+06	8.3499e+06	3.31289e+06	8.54851e+06	1.31931e+07	4.2437e+06	4.93502e+06	1.05222e+06	758860	1.82131e+06	2.3912e+06	2.33696e+06	6.64849e+06	3.11538e+06	810352	2.36685e+06	2.07913e+06	81.31	6.61149e+06	6.05347e+06	51.7	0.36	-1.48	0.0018648	2.73	0.0275628	1.72486	322.186	707.1	11.8	Down
M323T319	1.20839e+06	981917	1.30663e+06	1.1426e+06	1.24188e+06	1.02188e+06	1.86796e+06	1.52425e+06	1.66146e+06	5.96769e+06	1.32597e+06	1.68232e+06	1.55439e+06	3.57113e+06	3.91833e+06	3.9e+06	2.94766e+06	2.62672e+06	56.16	1.28694e+06	1.22513e+06	22.49	2.29	1.2	0.0029526	2.53	0.0361958	1.67341	323.069	318.5	5.3	Up
M323T334	121395	200168	27485.9	58980.5	479299	386750	8672.58	218658	274952	402194	324757	369272	407976	836388	1.2969e+06	899295	601467	405085	60.98	187676	160782	91.06	3.2	1.68	0.0104118	1.98	0.0771942	1.60553	323.034	333.9	5.6	Up
M323T707	636707	1.02533e+06	1.12375e+06	687876	1.91268e+06	3.05734e+06	970786	966754	227633	102820	431176	498277	288567	562694	1.18364e+06	109797	425575	359872	82.39	1.29765e+06	998057	62.5	0.33	-1.61	0.004662	2.33	0.0475536	1.71099	323.19	707.1	11.8	Down
M323T90	254442	1.11428e+06	438681	206395	351913	504598	946694	763071	788614	5.15257e+06	1.02924e+06	955579	1.37795e+06	4.87735e+06	4.52127e+06	4.91869e+06	2.95266e+06	2.94961e+06	69.79	572509	471640	58.17	5.16	2.37	0.0018648	2.73	0.0275628	1.84251	323.218	90	1.5	Up
M324T319_2	336070	373467	320507	437879	376713	325973	468365	427527	296159	791651	753220	501236	491114	479402	343091	708732	545576	496175	34.14	383313	375090	14.55	1.42	0.51	0.0498834	1.3	0.201689	1.29079	324.067	318.6	5.3	Up
M324T476	410653	413100	352540	510482	367553	216052	338355	426242	428861	474744	564422	533668	481728	543027	499179	558445	510509	516423	9.28	379372	389103	22.44	1.35	0.43	0.0018648	2.73	0.0275628	1.64726	324.179	476.2	7.9	Up
M324T493_1	1.26931e+06	1.19104e+06	764638	1.28333e+06	679454	892609	1.13919e+06	978735	609340	304345	793205	634600	739126	507229	620227	587024	599387	614783	24.79	1.02479e+06	1.05896e+06	22.55	0.58	-0.77	0.0010878	2.96	0.0203124	1.85873	324.105	492.8	8.2	Down
M324T545	188773	211566	264664	116362	409472	358424	242189	228463	26766.4	49529.5	199665	166128	110853	201209	183472	23565.1	120148	138490	64.58	252489	235326	36.96	0.48	-1.07	0.004662	2.33	0.0475536	1.43905	324.264	544.6	9.1	Down
M324T755	1.16785e+06	1.05882e+06	1.4978e+06	1.16951e+06	4.07722e+06	5.92049e+06	1.35391e+06	1.12006e+06	180100	144708	551995	764543	278574	1.32868e+06	1.5357e+06	100163	610559	415285	91.23	2.17071e+06	1.26171e+06	83.8	0.28	-1.83	0.0206682	1.68	0.117429	1.63804	324.234	754.9	12.6	Down
M324T759	1.59596e+06	906423	2.0915e+06	1.30952e+06	1.15909e+06	953804	1.43345e+06	1.69231e+06	2.05681e+06	3.15947e+06	1.80592e+06	2.1054e+06	3.11101e+06	1.82025e+06	1.81739e+06	4.71188e+06	2.57352e+06	2.08111e+06	40	1.39276e+06	1.37149e+06	28.61	1.85	0.89	0.0018648	2.73	0.0275628	1.74899	324.216	759.4	12.7	Up
M325T109	2.04296e+07	2.54544e+07	2.70764e+07	2.58394e+07	2.06997e+07	2.47716e+07	2.62704e+07	2.52838e+07	2.38407e+07	4.36961e+07	3.06793e+07	2.65147e+07	2.66105e+07	3.94029e+07	3.27389e+07	2.62387e+07	3.12152e+07	2.86449e+07	22.58	2.44782e+07	2.53691e+07	10.26	1.28	0.35	0.0206682	1.68	0.117429	1.45713	325.042	109.3	1.8	Up
M325T174	557823	892942	810025	796187	584220	598947	1.31378e+06	588872	4.73889e+06	1.21568e+07	1.88772e+06	3.80038e+06	5.59867e+06	1.33127e+06	5.18351e+06	6.80507e+06	5.18779e+06	4.9612e+06	64.85	767850	697567	33.19	6.76	2.76	0.0001554	3.81	0.00610078	2.14232	325.014	173.8	2.9	Up
M325T189	582296	625474	557232	898161	1.04159e+06	528735	881614	604525	3.11421e+06	6.02906e+06	3.65918e+06	943612	2.22288e+06	1.87065e+06	3.33535e+06	2.96019e+06	3.01689e+06	3.0372e+06	49.87	714953	614999	27.23	4.22	2.08	0.0003108	3.51	0.00894927	2.1566	325.123	189	3.1	Up
M325T222	824643	495956	422696	994961	528210	314921	330337	477491	638581	7.85866e+06	4.54063e+06	1.23341e+06	1.33102e+06	512695	3.26549e+06	1.4622e+06	2.60534e+06	1.39661e+06	97.14	548652	486723	43.67	4.75	2.25	0.0029526	2.53	0.0361958	1.69421	325.123	222.2	3.7	Up
M325T508	243444	183378	194965	163999	200258	116308	228919	244284	327218	285236	287580	341399	325861	260512	225295	279276	291547	286408	13.28	196944	197612	22.06	1.48	0.57	0.0010878	2.96	0.0203124	1.84274	325.222	508.4	8.5	Up
M325T770	2.65042e+06	1.88724e+06	1.35647e+06	2.58855e+06	503209	438986	1.94646e+06	2.34407e+06	2.37266e+06	4.44282e+06	2.94456e+06	2.86696e+06	3.95074e+06	2.38554e+06	2.61731e+06	4.26672e+06	3.23091e+06	2.90576e+06	26.42	1.71443e+06	1.91685e+06	50.96	1.88	0.91	0.0029526	2.53	0.0361958	1.49595	325.215	770	12.8	Up
M325T99_1	5.59737e+06	7.11322e+06	6.39398e+06	4.69683e+06	6.92508e+06	7.54399e+06	6.49099e+06	6.08183e+06	7.09609e+06	8.03064e+06	6.95115e+06	7.40919e+06	6.41343e+06	6.85142e+06	8.21797e+06	8.32621e+06	7.41201e+06	7.25264e+06	9.53	6.35541e+06	6.44248e+06	14.24	1.17	0.22	0.0379176	1.42	0.171246	1.408	325.062	99.4	1.7	Up
M325T99_2	2.43489e+06	2.46735e+06	2.46839e+06	2.56466e+06	2.62399e+06	2.57262e+06	2.6029e+06	3.11983e+06	2.4886e+06	2.7293e+06	2.97777e+06	3.094e+06	2.77432e+06	3.31077e+06	2.75893e+06	2.90793e+06	2.8802e+06	2.84112e+06	8.74	2.60683e+06	2.56864e+06	8.39	1.1	0.14	0.0281274	1.55	0.141969	1.3892	325.113	99.1	1.7	Up
M326T100	1.61528e+06	487658	628199	447364	616017	554517	1.73685e+06	1.49153e+06	3.52439e+06	3.62903e+06	4.15171e+06	4.39922e+06	3.49861e+06	3.46009e+06	3.37966e+06	3.97825e+06	3.75262e+06	3.57671e+06	10	947177	622108	59.09	3.96	1.99	0.0001554	3.81	0.00610078	2.2378	326.063	99.6	1.7	Up
M326T306	59915.9	1.06237e+06	204764	39103.5	731605	129036	226457	653513	1.46721e+06	2.23623e+06	3.27768e+06	1.69048e+06	1.08076e+06	678736	1.86832e+06	230945	1.56629e+06	1.57885e+06	60.57	388346	215610	97.3	4.03	2.01	0.0029526	2.53	0.0361958	1.67773	326.182	306.1	5.1	Up
M326T654	611980	571120	2.0076e+06	75189	2.0463e+06	904580	1.2934e+06	1.37112e+06	558226	151539	49152.9	125429	563433	581209	60670.3	206055	286964	178797	82.82	1.11016e+06	1.09899e+06	63.11	0.26	-1.95	0.00699301	2.16	0.0602244	1.45169	326.252	653.7	10.9	Down
M326T722	749813	1.26556e+06	1.19366e+06	1.36961e+06	935410	1.01598e+06	1.25608e+06	1.26235e+06	1.72212e+06	1.77104e+06	1.74344e+06	1.32502e+06	2.06517e+06	1.11314e+06	1.28297e+06	1.35008e+06	1.54662e+06	1.5361e+06	20.94	1.13106e+06	1.22487e+06	18.57	1.37	0.45	0.0104118	1.98	0.0771942	1.5463	326.231	722.2	12	Up
M326T75_1	701550	319046	246595	313943	338744	79329	290591	290914	365463	503817	411265	1.59134e+06	2.2089e+06	1.55295e+06	2.23342e+06	1.15932e+06	1.25331e+06	1.35613e+06	61.4	322589	302428	53.81	3.89	1.96	0.0010878	2.96	0.0203124	1.75686	325.59	74.8	1.2	Up
M326T755	1.77672e+07	3.52174e+06	7.63922e+06	2.34694e+06	2.51538e+07	6.74286e+06	3.06642e+07	2.00467e+06	3.55994e+07	2.36237e+07	2.66898e+07	1.33807e+07	3.21725e+07	2.57526e+07	2.0658e+07	2.34475e+07	2.51655e+07	2.46881e+07	27.08	1.19801e+07	7.19104e+06	92.86	2.1	1.07	0.0281274	1.55	0.141969	1.55518	326.162	754.6	12.6	Up
M326T76	840928	885015	924564	1.04602e+06	989421	967642	1.02585e+06	985072	1.07539e+06	1.30795e+06	1.1202e+06	1.19451e+06	1.12923e+06	1.02074e+06	1.04208e+06	1.02801e+06	1.11476e+06	1.09779e+06	8.78	958064	976357	7.31	1.16	0.22	0.0018648	2.73	0.0275628	1.78223	326.164	75.9	1.3	Up
M326T763	2.24521e+07	1.28457e+08	3.67166e+07	6.34687e+07	1.85805e+07	1.54942e+07	2.81146e+07	7.84628e+07	1.94075e+07	2.59042e+07	4.08927e+07	8.17216e+06	9.63766e+06	1.36152e+07	1.17052e+07	8.0209e+06	1.71694e+07	1.26602e+07	66.33	4.89683e+07	3.24156e+07	79.96	0.35	-1.51	0.0206682	1.68	0.117429	1.51362	326.162	763.2	12.7	Down
M326T840	4.96086e+06	1.24224e+07	9.53841e+06	1.79945e+07	3.58637e+06	9.09982e+06	5.60695e+06	2.04378e+07	3.77495e+06	4.5956e+06	2.90774e+06	6.47758e+06	5.25533e+06	4.57835e+06	2.99578e+06	5.09787e+06	4.4604e+06	4.58698e+06	27.02	1.04559e+07	9.31911e+06	58.72	0.43	-1.23	0.0206682	1.68	0.117429	1.58466	326.378	839.6	14	Down
M326T89	7.89263e+06	7.35997e+06	6.80085e+06	6.95243e+06	6.56491e+06	6.84034e+06	7.3034e+06	7.33983e+06	4.72457e+06	2.71313e+06	4.08148e+06	5.57622e+06	4.60439e+06	5.68772e+06	3.49068e+06	5.50112e+06	4.54741e+06	4.66448e+06	23.51	7.1318e+06	7.12792e+06	5.93	0.64	-0.65	0.0001554	3.81	0.00610078	2.02551	326.03	88.8	1.5	Down
M327T105_1	407202	475189	428454	461098	504798	370395	472730	515745	480679	242518	428512	450762	388123	242145	259165	303493	349424	345808	28.3	454451	466914	10.87	0.77	-0.38	0.0498834	1.3	0.201689	1.45475	327.105	104.8	1.7	Down
M327T114_2	4.09378e+06	4.1581e+06	4.68532e+06	4.40025e+06	4.09405e+06	4.20102e+06	4.34873e+06	4.96336e+06	4.17823e+06	4.79984e+06	5.01617e+06	5.88247e+06	4.21876e+06	6.25802e+06	4.72431e+06	4.99437e+06	5.00902e+06	4.89711e+06	14.64	4.36807e+06	4.27487e+06	7.13	1.15	0.2	0.0281274	1.55	0.141969	1.32486	327.158	114.1	1.9	Up
M327T116	3.53221e+06	4.03699e+06	4.11142e+06	5.38753e+06	3.39546e+06	3.62553e+06	3.78727e+06	2.43657e+06	2.42838e+06	2.34956e+06	3.48129e+06	1.71112e+06	1.66192e+06	3.76254e+06	2.20433e+06	2.84316e+06	2.55529e+06	2.38897e+06	29.91	3.78912e+06	3.7064e+06	21.85	0.67	-0.57	0.00699301	2.16	0.0602244	1.63016	327.085	115.6	1.9	Down
M327T416	148948	137726	210698	143616	162454	174087	130052	198389	194506	174102	199064	256688	260484	322175	198022	172224	222158	198543	23.66	163246	155701	17.86	1.36	0.44	0.0206682	1.68	0.117429	1.58085	326.677	415.7	6.9	Up
M327T567	2.6851e+06	189327	1.30988e+06	145062	2.20847e+06	620257	1.39209e+06	1.52909e+06	220581	113625	60829.8	60834.5	75314.4	783277	43776.5	119905	184768	94469.9	134.35	1.25991e+06	1.35098e+06	72.38	0.15	-2.77	0.0029526	2.53	0.0361958	1.77826	327.224	567.2	9.5	Down
M327T606	290303	139913	367053	84989.6	173130	119699	438208	102739	661894	323057	313642	1.15e+06	552999	519640	298404	340959	520074	430300	55.38	214504	156521	62.19	2.42	1.28	0.0104118	1.98	0.0771942	1.6605	327.154	606.4	10.1	Up
M328T324	214492	53401.5	242774	46037.4	249597	51692.4	57065.5	179834	317487	538049	96830.2	64544.3	305981	364393	421845	415965	315637	340940	51.39	136862	118450	68	2.31	1.21	0.0104118	1.98	0.0771942	1.34837	328.096	323.9	5.4	Up
M328T408	4.92572e+07	3.0251e+07	5.63119e+07	4.75988e+07	7.63308e+07	2.7746e+07	2.72144e+07	5.17963e+07	8.77865e+07	6.06418e+07	7.35265e+07	2.55823e+07	9.20993e+07	1.268e+08	8.18764e+07	6.61704e+07	7.68104e+07	7.77015e+07	37.76	4.58133e+07	4.8428e+07	36.96	1.68	0.75	0.0281274	1.55	0.141969	1.35808	328.232	407.8	6.8	Up
M328T427	246745	79086.9	1.09365e+06	580729	512328	1.17625e+06	1.60394e+06	1.12095e+06	2.24012e+06	1.44972e+06	1.46353e+06	2.68096e+06	1.21238e+06	2.17953e+06	1.20095e+06	531127	1.61979e+06	1.45663e+06	43.05	801711	837188	65.56	2.02	1.01	0.014763	1.83	0.0952789	1.35123	328.203	426.9	7.1	Up
M328T435	151824	229473	143629	1.31819e+06	420859	103726	276017	252460	3.48846e+06	3.62842e+06	4.28485e+06	541409	5.10515e+06	467323	5.55379e+06	4.39353e+06	3.43287e+06	3.95664e+06	56.29	362022	240966	110.16	9.48	3.25	0.000621601	3.21	0.0140919	2.00337	328.223	435.3	7.3	Up
M328T471_2	7757.25	4851.27	8118.3	9093.9	2810.02	3229.78	264042	42001.5	7305.86	22072	227430	12004.8	214669	305900	409913	48374.7	155959	131522	99.29	42738.1	7937.77	211.37	3.65	1.87	0.0379176	1.42	0.171246	1.35049	328.163	471.1	7.9	Up
M328T540	5.45242e+06	5.1126e+06	6.2126e+06	5.83343e+06	3.67631e+06	3.32005e+06	5.39989e+06	4.84006e+06	1.03464e+07	9.3676e+06	4.98186e+06	9.41128e+06	1.0867e+07	4.42565e+06	5.6414e+06	8.63626e+06	7.95968e+06	9.00193e+06	32	4.98092e+06	5.25624e+06	20.28	1.6	0.68	0.0498834	1.3	0.201689	1.49701	328.157	540	9	Up
M328T554	413366	664777	629434	391867	726113	815524	777607	834745	450388	559101	144879	85424.2	730715	374255	476040	430065	406358	440227	51.64	656679	695445	26.16	0.62	-0.69	0.0498834	1.3	0.201689	1.26154	328.212	554.3	9.2	Down
M328T604	427145	303297	455996	464010	147846	189288	243874	313849	458447	594104	424518	985513	649490	452006	345532	408763	539796	455226	38.11	318163	308573	38.22	1.7	0.76	0.0379176	1.42	0.171246	1.4784	328.201	603.6	10.1	Up
M328T632	249506	212356	201038	227858	117409	102585	214944	322186	470093	413170	294182	358884	603445	188047	235189	406218	371154	382551	35.98	205985	213650	34.11	1.8	0.85	0.014763	1.83	0.0952789	1.56535	328.19	631.9	10.5	Up
M328T759	1.44602e+07	1.09046e+07	1.50474e+07	8.45191e+06	7.20893e+06	6.81007e+06	8.814e+06	7.88441e+06	3.01625e+06	3.4006e+06	3.6947e+06	4.34287e+06	3.80603e+06	1.20752e+07	1.16116e+07	4.31364e+06	5.78262e+06	4.05984e+06	65.17	9.94769e+06	8.63296e+06	32.33	0.58	-0.78	0.0379176	1.42	0.171246	1.54103	328.23	759.3	12.7	Down
M328T78	1.76887e+06	1.88372e+06	2.14482e+06	1.59167e+06	2.3131e+06	2.32388e+06	2.10201e+06	2.02821e+06	426583	1.50388e+06	1.87581e+06	1.76448e+06	413877	1.57371e+06	1.67694e+06	1.39736e+06	1329080	1.53879e+06	43.66	2.01953e+06	2.06511e+06	12.77	0.66	-0.6	0.0018648	2.73	0.0275628	1.31429	328.053	78	1.3	Down
M329T107	306062	444501	228176	528992	166785	351620	182660	246462	410283	765393	467555	252946	379358	931955	963688	983554	644341	616474	46.33	306907	276262	41.8	2.1	1.07	0.014763	1.83	0.0952789	1.54362	329.217	106.8	1.8	Up
M329T471	65431	80019.3	699386	66596.5	38147	32013.5	91608.9	124095	2.15949e+06	3.03118e+06	2.82022e+06	781523	1.87446e+06	899812	935479	1.65061e+06	1.7691e+06	1.76254e+06	49.19	149662	73307.9	149.69	11.82	3.56	0.0001554	3.81	0.00610078	2.22777	329.154	471.2	7.9	Up
M329T602	311478	431710	317457	334366	255822	365980	321573	325830	384970	533891	430545	869758	480513	416358	284563	375511	472014	423451	37.47	333027	323701	15.09	1.42	0.5	0.0281274	1.55	0.141969	1.31477	329.16	601.5	10	Up
M329T724	592263	318336	330601	675882	156950	282838	360397	369813	687694	944138	837943	546075	497775	534626	664354	730574	680397	676024	22.89	385885	345499	43.61	1.76	0.82	0.00699301	2.16	0.0602244	1.68732	328.938	723.6	12.1	Up
M329T759	1.1406e+06	1.23783e+06	1.3932e+06	1.11721e+06	3.34767e+06	3.65526e+06	1.26417e+06	966324	635673	715720	800867	1.13544e+06	894398	1.02527e+06	2.4535e+06	913836	1.07184e+06	904117	54.2	1.76528e+06	1.251e+06	61.28	0.61	-0.72	0.014763	1.83	0.0952789	1.11671	329.233	759.3	12.7	Down
M329T782	1.45744e+06	1.72856e+06	2.20748e+06	2.21351e+06	4.32232e+06	3.42049e+06	1.84522e+06	2.94062e+06	3.70419e+06	4.67334e+06	4.3347e+06	2.98295e+06	3.40358e+06	4.05256e+06	5.78031e+06	5.10769e+06	4.25492e+06	4.19363e+06	21.62	2.51696e+06	2.2105e+06	38.69	1.69	0.76	0.004662	2.33	0.0475536	1.8184	329.316	782.1	13	Up
M330T318	3.46076e+06	1.73982e+07	2.50144e+06	3.54695e+06	2.50984e+06	2.01805e+06	3.15299e+06	2.98998e+06	1.47434e+06	2.02418e+06	2.16889e+06	3.20793e+06	1.52124e+06	1.74292e+06	1.44989e+06	1.70658e+06	1.912e+06	1.72475e+06	30.54	4.69727e+06	3.07148e+06	109.81	0.41	-1.3	0.00699301	2.16	0.0602244	1.46803	330.14	318.1	5.3	Down
M330T382	174836	558312	289345	335686	477854	303991	266858	344529	1.34249e+06	1.40585e+06	1.06785e+06	1.09289e+06	868344	1.31366e+06	3.10286e+06	1.25506e+06	1.43112e+06	1.28436e+06	48.78	343926	319838	35.28	4.16	2.06	0.0001554	3.81	0.00610078	2.24302	330.202	382.2	6.4	Up
M330T452	13062.1	20825.6	20801.6	14160	13754	53161.3	42497.5	25829.1	142404	339220	61945	151660	201629	222189	444916	226920	223861	211909	53.59	25511.4	20813.6	57.75	8.77	3.13	0.0001554	3.81	0.00610078	2.24127	330.074	452.4	7.5	Up
M330T699	1.59577e+06	1.18412e+06	904654	867477	699633	564841	413279	1.01117e+06	988064	460644	427573	660333	340084	350723	356764	331196	489423	392168	46.76	905118	886066	41.07	0.54	-0.89	0.014763	1.83	0.0952789	1.58661	330.227	699.4	11.7	Down
M330T771	4.7053e+06	1.1419e+07	1.18266e+07	5.80284e+06	1.88334e+07	3.97537e+07	9.36136e+06	8.78551e+06	807611	483568	4.5575e+06	4.56218e+06	1.51535e+06	9.40392e+06	8.69192e+06	314781	3.7921e+06	3.03643e+06	96.54	1.3811e+07	1.03902e+07	82.1	0.27	-1.86	0.004662	2.33	0.0475536	1.59649	330.263	771.4	12.9	Down
M330T782	1.86442e+06	2.30185e+06	2.81246e+06	3.86632e+06	8.33471e+06	5.88485e+06	2.21967e+06	3.3496e+06	6.00456e+06	3.86218e+06	7.89197e+06	5.27217e+06	6.2309e+06	7.15276e+06	6.86423e+06	3.89878e+06	5.8972e+06	6.11773e+06	24.94	3.82923e+06	3.08103e+06	58.04	1.54	0.62	0.0379176	1.42	0.171246	1.4586	330.319	782	13	Up
M330T790	3.95366e+06	4.73275e+06	3.8436e+06	4.28779e+06	4.58986e+06	4.93929e+06	5.31518e+06	5.62039e+06	4.10821e+06	4.96399e+06	3.71387e+06	2.21594e+06	3.75728e+06	4.40943e+06	3.95597e+06	2.79297e+06	3.73971e+06	3.85662e+06	23.38	4.66031e+06	4.6613e+06	13.43	0.8	-0.32	0.0498834	1.3	0.201689	1.27483	330.299	790.4	13.2	Down
M330T819	2.49863e+06	1.82943e+06	6.79184e+06	6.84366e+06	6.61564e+06	1.36166e+06	3.3698e+06	3.00027e+06	3.77306e+07	2.10953e+07	2.16569e+07	1.20719e+07	1.32563e+07	1.52555e+07	1.70776e+07	2.95549e+07	2.09624e+07	1.90865e+07	41.96	4.03887e+06	3.18504e+06	57.71	5.19	2.38	0.0001554	3.81	0.00610078	2.17316	330.299	818.7	13.6	Up
M331T180	1.84217e+07	1.67785e+07	2.08806e+07	1.69893e+07	1.94326e+07	1.25036e+07	2.24097e+07	2.29632e+07	1.22017e+07	8.15723e+06	7.56577e+06	2.19227e+06	1.06896e+07	1.48297e+06	5.42187e+06	5.90951e+06	6.70261e+06	6.73764e+06	56.07	1.87974e+07	1.89271e+07	18.24	0.36	-1.49	0.0001554	3.81	0.00610078	1.8925	331.014	179.7	3	Down
M331T469	791.665	5493.17	9475.54	18081.4	12308.8	4083.48	8669.2	84780.2	35356	73670.8	73873.2	36458.6	127818	189307	216640	51985.4	100639	73772	69.5	17960.4	9072.37	153.17	5.6	2.49	0.0029526	2.53	0.0361958	1.90995	331.195	469.3	7.8	Up
M331T598	447391	509768	745074	1.14022e+06	406156	1.05525e+06	1.02631e+06	971039	1.20432e+06	1.69595e+06	1.79257e+06	2.31195e+06	1.17229e+06	811407	2.20115e+06	1.44828e+06	1.57974e+06	1.57212e+06	32.94	787652	858057	37.99	2.01	1	0.0018648	2.73	0.0275628	1.75774	331.209	598.2	10	Up
M331T771	1.82466e+06	1.29149e+06	1.02734e+06	3.40055e+06	2.11283e+06	1.6772e+06	1.12416e+06	896204	959113	1.03512e+06	1.29685e+06	461847	787360	1.97533e+06	696095	524296	967002	873237	50.77	1.66931e+06	1.48435e+06	48.92	0.58	-0.79	0.0498834	1.3	0.201689	1.3639	331.265	771.5	12.9	Down
M331T815	1.68375e+07	2.76642e+07	3.53374e+07	4.27113e+07	3.10223e+07	1.01156e+07	4.60588e+07	6.22515e+07	1.96513e+07	1.71135e+06	4.60651e+06	5.02074e+07	2.33988e+07	1.72529e+07	5.83914e+06	7.22445e+06	16236487	1.22387e+07	97.48	3.39998e+07	3.31798e+07	48.9	0.48	-1.07	0.0498834	1.3	0.201689	1.37665	331.339	815.5	13.6	Down
M332T113	800625	1.4268e+06	1.80251e+06	2.48523e+06	479567	797797	724540	1.21108e+06	243724	107594	106909	57726.9	311065	74458.9	403580	66775.9	171479	107252	76.4	1.21602e+06	1.00585e+06	55	0.14	-2.83	0.0001554	3.81	0.00610078	2.15412	332.126	113.5	1.9	Down
M332T287_1	2.83528e+06	1.33047e+06	520524	1.31866e+06	2.27527e+06	203738	3.23757e+06	2.34032e+06	9.12444e+06	1.0279e+07	1.24185e+07	8.6433e+06	1.07786e+07	9.84877e+06	1.00328e+07	1.04723e+07	1.01997e+07	1.01559e+07	11.16	1.75773e+06	1.80287e+06	61.87	5.8	2.54	0.0001554	3.81	0.00610078	2.12316	332.273	287.4	4.8	Up
M332T569	1.47207e+06	1.75229e+06	352336	1.82221e+06	404397	921432	2.19217e+06	686999	3.22195e+06	7.05974e+06	1.984e+06	2.51157e+06	672479	2.30546e+06	4.03828e+06	4.33641e+06	3.26624e+06	2.86676e+06	59	1.20049e+06	1.19675e+06	58.42	2.72	1.44	0.00699301	2.16	0.0602244	1.48176	332.243	569.3	9.5	Up
M332T628_1	6.39537e+06	7.40075e+06	1.2311e+07	8.13551e+06	1.59741e+07	2.14771e+07	9.17579e+06	2.04667e+07	2.05445e+07	4.56764e+07	3.7806e+07	1.52284e+07	1.49029e+07	1.54756e+07	2.46491e+07	2.19508e+07	2.45292e+07	2.12477e+07	46.41	1.2667e+07	1.07434e+07	47.11	1.94	0.95	0.0206682	1.68	0.117429	1.63038	332.243	628.2	10.5	Up
M332T697	71687.7	272507	174615	246852	305895	23164	112211	132686	315552	567090	816401	271472	441455	94768	232858	308086	380960	311819	58.97	167452	153650	60.06	2.28	1.19	0.0281274	1.55	0.141969	1.33175	332.315	697.5	11.6	Up
M333T348_1	8.84916e+07	2.78627e+07	8.22555e+07	8.83261e+07	5.61979e+07	3.97377e+07	1.31739e+08	8.14196e+07	2.37724e+07	1.98987e+07	5.55567e+07	1.60949e+07	2.34321e+07	6.41592e+06	1.63615e+07	1.73346e+07	2.23583e+07	1.86166e+07	64.72	7.45038e+07	8.18375e+07	43.9	0.3	-1.74	0.000621601	3.21	0.0140919	1.90592	332.588	347.9	5.8	Down
M334T168	196310	152319	388882	193983	244206	217146	584579	239570	2.12126e+06	5.32314e+06	305966	405710	278319	3.68568e+06	3.40599e+06	3.37507e+06	2.36264e+06	2.74817e+06	80.13	277124	228358	51.42	8.53	3.09	0.0029526	2.53	0.0361958	1.75152	334.042	168.3	2.8	Up
M334T377	249200	1.24723e+06	118419	109759	100312	83234.5	83004.6	80579.4	737167	1.11578e+06	1.82166e+06	1.39295e+06	202293	1.1161e+06	621104	674794	960231	926475	52.79	258967	105036	155.67	3.71	1.89	0.00699301	2.16	0.0602244	1.81856	334.095	377.1	6.3	Up
M334T452	86876.3	93316.3	218275	125708	114990	118720	201913	200509	248076	383848	260502	235887	257103	159681	149454	277094	246456	252589	29.57	145038	122214	36.58	1.7	0.76	0.004662	2.33	0.0475536	1.66018	334.139	451.8	7.5	Up
M334T489_2	19579.5	55924.8	86027.2	197271	296379	144816	63576.4	56112.6	418462	4.90639e+06	2.18264e+06	29665.5	1.06636e+06	1.21538e+06	783155	2.33416e+06	1.61703e+06	1140868	95.72	114961	74801.8	80.6	14.07	3.81	0.00699301	2.16	0.0602244	1.77158	333.874	489.4	8.2	Up
M334T689	683516	362822	411691	893315	380838	1.26664e+06	368502	1.05057e+06	1.69601e+06	3.72796e+06	1.26109e+06	1.9133e+06	2.08677e+06	2.0559e+06	2.58514e+06	1.18429e+06	2.06381e+06	1.9846e+06	39.35	677238	547603	52.53	3.05	1.61	0.000621601	3.21	0.0140919	2.04075	334.295	689.2	11.5	Up
M334T743	2.51725e+06	1.95317e+06	2.29541e+06	1.65585e+06	701069	819758	1.82742e+06	1.34583e+06	2.0423e+06	3.59568e+06	2.17311e+06	2.6407e+06	3.21325e+06	2.08714e+06	2.45856e+06	2.72377e+06	2.61682e+06	2.54963e+06	21.22	1.63947e+06	1.74163e+06	39.75	1.6	0.67	0.00699301	2.16	0.0602244	1.50238	334.295	743.5	12.4	Up
M335T325_2	139603	19375.6	98004.5	85203.6	184724	58913.2	162005	119634	265977	197042	237781	216277	198974	218460	202780	253598	223861	217369	11.6	108433	108819	50.29	2.06	1.05	0.0001554	3.81	0.00610078	1.73359	335.089	324.7	5.4	Up
M335T414_2	504847	539808	920264	1.68851e+06	650210	878139	1.00034e+06	1.90478e+06	551987	522694	547084	416398	617313	424191	400706	293669	471755	473442	22.37	1.01086e+06	899201	51.43	0.47	-1.1	0.00699301	2.16	0.0602244	1.67823	334.98	414.4	6.9	Down
M335T561	678694	472014	1.15364e+06	1.89667e+06	1.13069e+06	1.42392e+06	452404	2.63273e+06	1.53014e+06	2.64819e+06	3.69491e+06	1.32201e+06	2.7029e+06	2.22643e+06	1.55326e+06	1.84855e+06	2.1908e+06	2.03749e+06	36.39	1.23009e+06	1.14216e+06	61.06	1.78	0.83	0.0206682	1.68	0.117429	1.51407	335.181	561.5	9.4	Up
M335T626	2.06307e+07	1.14447e+07	1.33739e+07	1.32508e+07	4.54882e+06	4.1144e+06	1.22112e+07	1.96471e+07	3.80249e+07	3.58455e+07	3.20932e+07	2.20559e+07	2.7459e+07	1.05013e+07	1.73673e+07	2.92255e+07	2.65716e+07	2.83423e+07	35.39	1.24027e+07	1.2731e+07	48.49	2.14	1.1	0.0104118	1.98	0.0771942	1.59059	335.222	626.3	10.4	Up
M335T743	710297	706346	758531	820858	738596	406284	854099	826685	514757	160344	374311	704450	490422	287971	174622	348322	381900	361317	48.03	727712	748564	19.41	0.52	-0.93	0.0010878	2.96	0.0203124	1.75835	335.297	743.5	12.4	Down
M335T767	4.83996e+07	7.10011e+07	6.08288e+07	2.5032e+07	1.85614e+08	1.55388e+08	4.11869e+07	6.82078e+07	1.87388e+07	1.10286e+07	3.41466e+07	1.9931e+07	1.18068e+07	3.97928e+07	7.15296e+07	3.53414e+06	2.63135e+07	1.93349e+07	83.12	8.19572e+07	6.45183e+07	69.82	0.32	-1.64	0.0104118	1.98	0.0771942	1.55996	335.17	766.9	12.8	Down
M335T772	1.51391e+07	1.00713e+07	2.10503e+07	1.14987e+07	1.53988e+07	6.13968e+06	1.29369e+07	1.51407e+07	9.11714e+06	3.41689e+06	1.05328e+07	1.08392e+07	9.74885e+06	1.16895e+07	1.2835e+07	2.82014e+06	8.87495e+06	1.01408e+07	42.05	1.34219e+07	1.4038e+07	32.86	0.66	-0.6	0.0379176	1.42	0.171246	1.13408	335.221	772.3	12.9	Down
M336T517	9.28823e+06	8.39221e+06	6.45986e+06	8.12566e+06	1.23025e+06	3.34747e+06	2.4719e+06	1.32765e+07	1.50773e+07	1.3842e+07	9.0019e+06	1.12903e+07	1.35983e+07	1.45311e+07	1.36641e+07	2.98972e+06	1.17493e+07	1.36312e+07	34.46	6.57401e+06	7.29276e+06	61.34	1.79	0.84	0.014763	1.83	0.0952789	1.20288	336.167	517.4	8.6	Up
M336T527	4.69936e+06	2.32666e+06	4.48559e+06	4.01663e+06	1.73928e+06	4.9063e+06	6.56046e+06	4.97048e+06	6.81061e+06	1.26198e+07	9.46025e+06	5.43885e+06	7.45219e+06	8.32993e+06	9.63387e+06	1.10711e+07	8.85208e+06	8.89509e+06	26.37	4.21309e+06	4.59247e+06	36.54	2.1	1.07	0.0003108	3.51	0.00894927	1.8886	336.226	527.1	8.8	Up
M336T591	515447	318093	796962	114618	186355	185944	286815	623610	1.26132e+06	745689	434790	1.40291e+06	431380	696432	691968	303717	746026	694200	52.99	378480	302454	63.92	1.97	0.98	0.0498834	1.3	0.201689	1.37486	335.74	591.3	9.9	Up
M336T625	6.4246e+06	8.13868e+06	2.86485e+06	1.03895e+07	3.02377e+06	9.72781e+06	7.96786e+06	9.29147e+06	3.08149e+06	1.69129e+06	2.70683e+06	2.42303e+06	2.29259e+06	1.00753e+07	2.0819e+06	3.11391e+06	3.43329e+06	2.56493e+06	79.43	7.22857e+06	8.05327e+06	40.24	0.47	-1.07	0.0281274	1.55	0.141969	1.60138	336.122	624.5	10.4	Down
M336T79	2.49521e+06	2.71696e+06	3.7054e+06	2.21167e+06	4.97617e+06	5.06699e+06	3.43985e+06	2.81705e+06	1.8204e+06	1.42781e+06	2.44961e+06	2.57685e+06	1.86607e+06	2.84917e+06	2.37251e+06	1.22991e+06	2.07404e+06	2.11929e+06	27.77	3.42866e+06	3.12845e+06	31.93	0.6	-0.73	0.0104118	1.98	0.0771942	1.60517	336.013	79	1.3	Down
M336T837	9.90829e+06	1.41073e+07	1.01907e+07	8.01468e+06	5.47736e+06	1.11907e+07	6.47092e+06	8.67823e+06	1.27588e+07	1.18583e+07	1.18697e+07	2.86614e+07	1.47882e+07	1.08133e+07	1.27181e+07	6.38114e+06	1.37311e+07	1.22939e+07	47.32	9.25477e+06	9.29326e+06	29.59	1.48	0.57	0.0498834	1.3	0.201689	1.11729	336.301	837.5	14	Up
M336T99	334059	316554	377268	314237	349817	277542	419557	420786	515257	1.03388e+06	558107	478336	500305	602628	739370	853279	660146	580367	30.11	351227	341938	14.63	1.88	0.91	0.0001554	3.81	0.00610078	2.06824	336.047	98.6	1.6	Up
M337T413_1	2.43067e+06	3.85156e+06	2.92289e+06	3.93113e+06	3.0691e+06	5.13617e+06	2.99797e+06	3.61125e+06	2.98281e+06	745608	309693	1.29533e+06	1.442e+06	3.05475e+06	399136	1.90619e+06	1.51694e+06	1.36867e+06	70.57	3.49384e+06	3.34017e+06	23.98	0.43	-1.2	0.0029526	2.53	0.0361958	1.72463	336.568	412.7	6.9	Down
M337T452	335817	216992	219797	255512	223156	200254	255536	228597	368918	903044	355345	285522	331372	706037	398522	433651	472801	383720	45.66	241958	225877	17.51	1.95	0.97	0.000621601	3.21	0.0140919	1.82366	337.196	452.4	7.5	Up
M337T531	1.06989e+06	734158	621703	1.15043e+06	352224	203063	1.00089e+06	924928	1.30314e+06	999457	1.27432e+06	1.04946e+06	1.32678e+06	1.17862e+06	1.11326e+06	1.31192e+06	1.19462e+06	1.22647e+06	10.75	757161	829543	45.48	1.58	0.66	0.004662	2.33	0.0475536	1.41329	337.129	531	8.8	Up
M337T77_1	275481	204936	254375	206165	328506	250776	253282	230981	213477	549825	298966	381652	292245	262409	285284	256590	317556	288764	33.17	250563	252029	15.93	1.27	0.34	0.0498834	1.3	0.201689	1.11364	337.006	77	1.3	Up
M337T82	1.46175e+06	1.5872e+06	1.3407e+06	1.24296e+06	1.82412e+06	1.8948e+06	1.50588e+06	1.5751e+06	1.62294e+06	1.72738e+06	1.51473e+06	1.96679e+06	2.05006e+06	1.84641e+06	1.66803e+06	1.58759e+06	1.74799e+06	1.69771e+06	10.84	1.55406e+06	1.54049e+06	14.26	1.12	0.17	0.0498834	1.3	0.201689	1.16706	336.949	82	1.4	Up
M338T374	337877	285331	505374	225062	512668	365727	349499	481499	822103	682474	873678	810981	664889	739661	361910	664332	702504	711068	22.57	382880	357613	27.82	1.83	0.88	0.0018648	2.73	0.0275628	1.9089	338.136	374.1	6.2	Up
M338T375	224147	324728	432090	321780	445094	416913	422742	394143	598812	533869	586649	542174	579237	433011	429111	469575	521555	538021	13.2	372705	405528	20.45	1.4	0.48	0.0010878	2.96	0.0203124	1.76697	337.676	374.8	6.2	Up
M338T605	16050.3	40663.3	527.23	269.765	273.444	764.317	13821.3	921.149	312690	790363	452827	31579.2	191204	64413.5	529537	400560	346647	356625	73.04	9161.35	842.73	156.15	37.84	5.24	0.0003108	3.51	0.00894927	2.07863	338.178	604.9	10.1	Up
M339T112	39012.6	154529	31012.4	221630	22322	39812.6	25208.9	15048	312733	318632	284829	276244	319643	293987	276863	336502	302429	303360	7.44	68571.9	35012.5	111.35	4.41	2.14	0.0001554	3.81	0.00610078	2.03402	339.011	111.9	1.9	Up
M339T114_2	941824	1.16423e+06	1.06025e+06	1.14195e+06	815378	1.06346e+06	845642	991409	595711	1.01476e+06	618276	619514	557433	710560	648715	782538	693438	634114	21.29	1.00302e+06	1.02583e+06	12.84	0.69	-0.53	0.0018648	2.73	0.0275628	1.95076	339.08	113.9	1.9	Down
M339T811	6.31997e+06	5.14528e+06	4.10148e+06	3.28649e+06	4.97953e+06	3.61468e+06	6.50006e+06	5.9042e+06	8.09594e+06	8.07937e+06	5.89598e+06	9.36635e+06	6.02153e+06	6.28941e+06	6.7136e+06	5.08593e+06	6.94351e+06	6.5015e+06	20.63	4.98146e+06	5.0624e+06	24.58	1.39	0.48	0.0281274	1.55	0.141969	1.54802	339.289	810.8	13.5	Up
M339T82_2	3.34873e+06	7.04753e+06	7.80816e+06	2.72172e+06	7.03036e+06	6.18923e+06	7.68913e+06	7.09479e+06	7.95081e+06	7.82315e+06	8.17218e+06	9.79311e+06	8.3388e+06	7.52995e+06	7.79324e+06	7.99043e+06	8.17396e+06	7.97062e+06	8.55	6.11621e+06	7.03894e+06	32.22	1.34	0.42	0.0010878	2.96	0.0203124	1.36046	338.859	81.7	1.4	Up
M339T83	3.58949e+06	1.29298e+06	817962	6.26524e+06	2.80918e+06	1.32691e+06	2.06074e+06	1.21832e+06	2.92225e+06	5.36587e+06	4.50582e+06	3.02252e+06	4.0725e+06	5.7751e+06	3.18342e+06	7.78976e+06	4.57966e+06	4.28916e+06	36.66	2.4226e+06	1.69383e+06	74.68	1.89	0.92	0.0206682	1.68	0.117429	1.52906	339.107	82.6	1.4	Up
M340T730	1.35078e+06	1.50118e+06	1.49056e+06	1.54434e+06	2.30056e+06	1.12099e+06	2.43161e+06	1.49422e+06	2.8691e+06	5.50997e+06	1.27781e+07	3.45931e+06	3.16526e+06	1.19374e+06	4.41188e+06	2.95937e+06	4.54334e+06	3.31228e+06	78.2	1.65428e+06	1.4977e+06	27.86	2.75	1.46	0.00699301	2.16	0.0602244	1.66853	340.247	730.3	12.2	Up
M340T763	3.7055e+06	1.49326e+06	3.49337e+06	3.30681e+06	2.20353e+06	1.17515e+06	3.88427e+06	1.66982e+06	1.44841e+06	652585	3.25857e+06	1.25447e+06	1.1648e+06	1.36453e+06	1.29902e+06	798855	1.40515e+06	1.27674e+06	56.83	2.61646e+06	2.75517e+06	41.98	0.54	-0.9	0.0104118	1.98	0.0771942	1.46311	340.236	763	12.7	Down
M340T824	2.56782e+06	7.64156e+06	5.38786e+06	3.5804e+06	7.83675e+06	1.57047e+07	8.99059e+06	8.26639e+06	420601	1.86381e+06	1.82793e+06	5.4504e+06	1.58582e+06	4.60311e+06	4.19922e+06	73888.9	2.5031e+06	1.84587e+06	79.78	7.49701e+06	7.73915e+06	53.93	0.33	-1.58	0.00699301	2.16	0.0602244	1.45323	340.321	824.1	13.7	Down
M341T351	2.26742e+06	2.25163e+06	1.8256e+06	2.22422e+06	2.62878e+06	2.4884e+06	2.26386e+06	3.20907e+06	1.69562e+06	2.58021e+06	1.81053e+06	1.92465e+06	1.73836e+06	2.111e+06	1.43301e+06	1.95581e+06	1.90615e+06	1.86759e+06	17.79	2.39487e+06	2.26564e+06	16.8	0.8	-0.33	0.014763	1.83	0.0952789	1.43632	341.108	351.1	5.9	Down
M341T369	1.47081e+06	2.66466e+06	839721	447254	767198	719756	831134	632347	1.48062e+06	2.7078e+06	2.83121e+06	669629	1.63535e+06	1.68414e+06	1.82244e+06	2.36153e+06	1.89909e+06	1.75329e+06	37.47	1.04661e+06	799166	68.55	1.81	0.86	0.0281274	1.55	0.141969	1.41814	341.108	369.2	6.2	Up
M341T561	20692.3	25835.1	25483.3	49440.5	32560.6	25927.2	29323.8	23426.4	74680.5	61669.1	117148	29439.9	25775.5	30238.4	160995	63794.7	70467.6	62731.9	67.45	29086.1	25881.2	30.82	2.42	1.28	0.014763	1.83	0.0952789	1.52027	341.242	560.6	9.3	Up
M341T679	17484.1	51585.5	64280.2	57608.5	38045.1	106531	109086	84643.8	153853	1.04794e+06	194994	85567.5	367026	1.63058e+06	1.49729e+06	1.4491e+06	803294	707484	83.38	66158	60944.3	48.69	12.14	3.6	0.000621601	3.21	0.0140919	1.93985	341.233	679.4	11.3	Up
M341T99	3.19455e+07	3.20857e+07	7.6426e+07	5.068e+06	7.87207e+07	4.8243e+07	8.62012e+07	5.53916e+07	2.31652e+07	6.50713e+06	1.6915e+06	2.34524e+07	1.97176e+07	1.17221e+07	2.44383e+06	2.04657e+07	1.36457e+07	1.57198e+07	67.46	5.17602e+07	5.18173e+07	54.19	0.26	-1.92	0.004662	2.33	0.0475536	1.53488	341.002	99.4	1.7	Down
M342T179	2.45957e+08	1.26397e+08	1.32417e+08	1.80835e+08	2.27695e+08	1.01488e+08	2.23335e+08	1.34437e+08	9.65289e+07	1.24344e+08	9.30364e+07	1.08328e+08	1.20448e+08	2.24905e+07	1.42336e+08	8.6923e+07	9.93045e+07	1.02429e+08	36.32	1.7157e+08	1.57636e+08	32.16	0.58	-0.79	0.00699301	2.16	0.0602244	1.39691	342.177	179.3	3	Down
M342T500	94667.3	214456	116648	174969	58429	87348.7	119437	185536	228373	308012	168521	127973	204208	196687	185873	183765	200426	191280	26.09	131436	118043	41.38	1.52	0.61	0.0281274	1.55	0.141969	1.41016	342.202	500.4	8.3	Up
M342T534	832739	478769	136149	803330	806915	758419	712651	1.08762e+06	1.35228e+06	1.24165e+06	822433	850971	1.28761e+06	897557	1.54723e+06	1.03643e+06	1.12952e+06	1.13904e+06	23.57	702074	780875	40.3	1.61	0.69	0.0029526	2.53	0.0361958	1.36675	342.226	534.5	8.9	Up
M342T535	8.76277e+06	1.34511e+06	1.75365e+06	6.64275e+06	6.58669e+06	6.29794e+06	4.15685e+06	8.51487e+06	2.16704e+07	8.556e+06	9.43006e+06	3.32331e+06	1.76755e+07	1.60767e+07	2.29883e+07	9.67577e+06	1.36745e+07	1.28762e+07	50.95	5.50758e+06	6.44232e+06	51.34	2.48	1.31	0.00699301	2.16	0.0602244	1.52513	342.213	534.6	8.9	Up
M342T588	344746	136402	348957	495112	395689	229408	347556	620739	358478	624476	1.34076e+06	296051	591501	413856	507641	696425	603649	549571	54.31	364826	348257	40.77	1.65	0.73	0.0498834	1.3	0.201689	1.27782	342.19	588.1	9.8	Up
M342T736	22489.5	8861.48	42219.1	12538.7	93537.9	48363.3	14858.3	86473	61127.1	110607	165860	54869	61151.2	42794.2	63031.3	104106	82943.2	62091.2	49.58	41167.7	32354.3	80.84	2.01	1.01	0.0281274	1.55	0.141969	1.51872	342.15	736.1	12.3	Up
M343T280	3.42305e+07	3.11015e+07	3.25145e+07	3.38411e+07	3.38926e+07	2.80383e+07	3.57543e+07	3.16991e+07	2.98135e+07	3.10489e+07	3.18012e+07	3.10276e+07	2.94518e+07	3.04147e+07	2.85547e+07	3.04106e+07	3.03154e+07	3.04126e+07	3.38	3.2634e+07	3.31778e+07	7.3	0.93	-0.11	0.0206682	1.68	0.117429	1.37347	343.182	280.1	4.7	Down
M343T344	387514	413960	382114	490654	358542	281144	566328	510345	523840	726076	485098	473107	656360	538181	686640	476061	570670	531010	18.01	423825	400737	21.85	1.35	0.43	0.0281274	1.55	0.141969	1.57519	343.098	344	5.7	Up
M343T436	62059.4	46414.1	119238	67246.9	46465.8	56992.7	109077	344191	496315	1.33757e+06	142954	378128	557913	637261	612232	1.12617e+06	661068	585073	58.95	106461	64653.1	93.83	6.21	2.63	0.0003108	3.51	0.00894927	2.0834	343.201	435.9	7.3	Up
M343T535_1	1.52627e+07	6.04709e+06	1.11085e+07	1.72625e+06	4.51299e+06	6.72261e+06	3.75854e+06	1.74922e+06	3.00433e+06	2.59715e+06	1.1656e+06	1.42084e+06	3.50151e+06	8.98008e+06	1.22368e+06	1.43679e+06	2.91625e+06	2.01697e+06	89.4	6.36099e+06	5.28004e+06	73.96	0.46	-1.13	0.0379176	1.42	0.171246	1.23914	342.548	534.6	8.9	Down
M343T535_3	1.10823e+06	179897	843578	99171.2	876802	505673	621999	337721	453966	143233	67310.2	81650.4	293736	187782	190513	93345.8	188942	165508	68.94	571634	563836	62.49	0.33	-1.6	0.0206682	1.68	0.117429	1.46043	343.216	534.6	8.9	Down
M343T81_1	1.57563e+07	4.43842e+07	2.11417e+07	1.99576e+07	7.48558e+07	8.66914e+06	4.75721e+07	2.77139e+07	1.23242e+08	8.24294e+07	1.83566e+08	1.45491e+08	6.15902e+07	2.63825e+07	1.08009e+08	4.2775e+07	9.66857e+07	9.52193e+07	55.35	3.25063e+07	2.44278e+07	67	2.97	1.57	0.0104118	1.98	0.0771942	1.66944	342.86	80.8	1.3	Up
M343T81_3	1.84269e+06	4.38603e+06	2.5255e+06	2.22857e+06	1.88724e+06	1.65829e+06	2.71127e+06	4.23527e+06	2.88518e+06	81111.9	1.59567e+06	1.58939e+06	2.49302e+06	924724	523065	1.26769e+06	1.41998e+06	1.42854e+06	66.4	2.68436e+06	2.37703e+06	39.65	0.53	-0.92	0.0206682	1.68	0.117429	1.28413	342.955	81.4	1.4	Down
M344T317_1	773750	359020	985737	947852	1.10481e+06	576302	707215	965582	1.38681e+06	2.06993e+06	1.40525e+06	1.22391e+06	1.43481e+06	1.65162e+06	1.31541e+06	1.22776e+06	1.46444e+06	1.39603e+06	19.11	802533	860801	30.9	1.82	0.87	0.0001554	3.81	0.00610078	1.94664	343.683	317.2	5.3	Up
M344T317_2	431044	481876	505104	691722	570434	288822	365210	428306	784111	595961	1.42281e+06	654462	896938	570220	788393	525387	779785	719286	37.09	470315	456460	26.37	1.66	0.73	0.004662	2.33	0.0475536	1.65531	343.933	317	5.3	Up
M344T348	645373	468137	536134	378276	585398	461787	661170	504044	268859	452461	337254	360568	279478	415406	353578	421168	361096	357073	18.34	530040	520089	18.29	0.68	-0.55	0.0010878	2.96	0.0203124	1.81543	344.18	347.6	5.8	Down
M344T421	195285	636665	538479	229078	240101	136991	56638.6	440564	924420	730579	551906	256891	967397	783669	740237	478844	679243	735408	34.98	309225	234590	66.35	2.2	1.14	0.004662	2.33	0.0475536	1.55097	344.205	421.4	7	Up
M344T763	2.14758e+07	2.01085e+07	2.94753e+07	2.27462e+07	3.30304e+07	1.72098e+07	3.31229e+07	2.47512e+07	3.8306e+07	5.12212e+07	1.03379e+08	2.93831e+07	2.7758e+07	2.35897e+07	4.46139e+07	3.19701e+07	4.37777e+07	3.5138e+07	58.87	2.524e+07	2.37487e+07	23.78	1.73	0.79	0.0379176	1.42	0.171246	1.4259	344.28	762.9	12.7	Up
M344T89	645171	699539	749320	670571	568804	507353	937934	696279	759363	1.4542e+06	962650	1.10174e+06	999999	1.37861e+06	1.10227e+06	1.82412e+06	1.19787e+06	1.102e+06	28.15	684371	683425	18.75	1.75	0.81	0.0003108	3.51	0.00894927	1.92668	344.111	89.3	1.5	Up
M344T91	1.26313e+06	2.44335e+06	1.60038e+06	1.81176e+06	1.78861e+06	970544	1.7181e+06	1.07643e+06	3.75714e+06	5.59545e+06	3.22191e+06	3.20604e+06	2.81745e+06	3.06885e+06	2.91633e+06	4.00822e+06	3.57392e+06	3.21397e+06	25.53	1.58404e+06	1.65924e+06	30.06	2.26	1.17	0.0001554	3.81	0.00610078	2.09713	344.084	90.9	1.5	Up
M345T115	1.00962e+06	1.07783e+06	560812	734832	1.60011e+06	2.62537e+06	1.11546e+06	1.14503e+06	1.25166e+06	2.75139e+06	1.21247e+06	1.09094e+06	1.60661e+06	2.12052e+06	1.22675e+06	2.39384e+06	1.70678e+06	1.42914e+06	37.09	1.23363e+06	1.09664e+06	51.9	1.38	0.47	0.0498834	1.3	0.201689	1.09075	345.14	115.4	1.9	Up
M345T427_2	1.2706e+06	36142.1	183084	295576	568175	129800	246272	123289	554828	2.22655e+06	1.5402e+06	1.23301e+06	651641	342539	1.11391e+06	1.21362e+06	1.10954e+06	1.16376e+06	54.56	356617	214678	112.9	3.11	1.64	0.0104118	1.98	0.0771942	1.69774	345.242	426.9	7.1	Up
M345T763_1	1.8583e+06	2.06887e+06	4.3634e+06	1.29589e+06	2.67005e+06	558941	2.8728e+06	806853	1.60686e+06	386385	842893	787247	513238	876029	648384	436143	762147	717816	50.96	2.06189e+06	1.96359e+06	60.2	0.37	-1.44	0.014763	1.83	0.0952789	1.62087	345.187	763	12.7	Down
M345T81	2.00583e+07	2.03605e+07	2.0371e+07	2.07118e+07	2.09927e+07	2.22366e+07	1.933e+07	2.14463e+07	2.15923e+07	2.88737e+07	2.0996e+07	2.31656e+07	2.19316e+07	2.25609e+07	2.33443e+07	2.58501e+07	2.35393e+07	2.28633e+07	11.1	2.06884e+07	2.05414e+07	4.29	1.14	0.19	0.0018648	2.73	0.0275628	1.60232	344.858	80.8	1.3	Up
M346T402	1.33789e+06	6.39238e+06	3.30161e+06	1.99792e+06	5.31691e+06	3.11486e+06	4.20515e+06	7.80074e+06	1.31033e+07	1.92647e+07	5.04806e+06	3.90362e+06	5.16968e+06	1.22769e+07	1.752e+07	1.34305e+07	1.12146e+07	1.26901e+07	52.45	4.18343e+06	3.75338e+06	52.71	2.68	1.42	0.0206682	1.68	0.117429	1.64168	346.222	401.5	6.7	Up
M346T744	1.4901e+06	477634	681511	1.33937e+06	1.25608e+06	530755	1.79429e+06	1.05468e+06	4.7088e+06	1.34872e+06	2.12482e+06	3.79251e+06	4.7642e+06	5.39477e+06	1.78732e+06	3.12736e+06	3.38106e+06	3.45993e+06	45.01	1.07805e+06	1.15538e+06	44.36	3.14	1.65	0.0010878	2.96	0.0203124	1.90967	346.203	743.7	12.4	Up
M347T402	463310	1.3708e+06	1.08921e+06	590705	888973	1.1535e+06	1.22558e+06	1.2126e+06	1.4126e+06	3.52898e+06	1.80872e+06	1.05162e+06	1.79502e+06	3.61954e+06	3.03404e+06	4.08107e+06	2.54145e+06	2.42138e+06	45.45	999336	1.12136e+06	32.38	2.54	1.35	0.0029526	2.53	0.0361958	1.82239	347.224	401.8	6.7	Up
M347T470	413509	425318	444543	393709	538900	567898	470783	458861	311884	345426	154592	273589	344300	475541	460688	251345	327171	328092	32.49	464190	451702	13.09	0.7	-0.5	0.0281274	1.55	0.141969	1.52122	347.123	469.7	7.8	Down
M347T764	5.11468e+06	6.75174e+06	5.91213e+06	8.08213e+06	3.61451e+06	2.90211e+06	7.33889e+06	8.39709e+06	8.98695e+06	9.66092e+06	8.4241e+06	5.45113e+06	1.00299e+07	8.40477e+06	8.75668e+06	8.91481e+06	8.57866e+06	8.83574e+06	16.14	6.01416e+06	6.33193e+06	33.56	1.43	0.51	0.0029526	2.53	0.0361958	1.42267	347.298	763.5	12.7	Up
M348T146	6.46604e+06	3.50018e+06	5.07357e+06	5.81516e+06	5.05184e+06	6.31218e+06	6.42963e+06	6.74642e+06	7.84806e+06	7.79102e+06	7.28009e+06	9.20413e+06	5.7895e+06	7.08038e+06	7.76385e+06	6.53018e+06	7.4109e+06	7.52197e+06	13.69	5.67438e+06	6.06367e+06	19.13	1.31	0.39	0.004662	2.33	0.0475536	1.60921	348.069	145.7	2.4	Up
M348T174	11030.5	147886	24791.8	16222	28102	21688.4	56783.9	28570.8	143669	228692	441217	341238	155833	168094	42723.6	452959	246803	198393	60.54	41884.4	26447	107.29	5.89	2.56	0.0010878	2.96	0.0203124	1.9407	348.03	174	2.9	Up
M348T332	757222	674931	510375	652342	476489	537414	571867	465590	113065	89130.7	452892	663467	670573	402067	467811	282477	392685	427480	56.32	580779	554641	17.96	0.68	-0.56	0.0498834	1.3	0.201689	1.22526	348.085	332	5.5	Down
M348T345	3.28457e+06	2.09718e+06	2.54738e+06	243958	3.39301e+06	2.11803e+06	3.56108e+06	2.28139e+06	297596	219423	365539	561444	554041	2.1021e+06	593650	1.60448e+06	787284	557743	86.94	2.44082e+06	2.41438e+06	43.69	0.32	-1.63	0.0104118	1.98	0.0771942	1.51694	348.121	345	5.8	Down
M348T391_2	20532.1	1.60314e+06	222788	125278	178277	326869	102049	278519	270666	5.18123e+06	718608	301811	307405	4.49039e+06	2.88125e+06	3.41885e+06	2.19628e+06	1.79993e+06	92.97	357182	200533	143.61	6.15	2.62	0.0104118	1.98	0.0771942	1.53154	347.954	391.1	6.5	Up
M348T520	36214.2	50610.5	36265.2	33002.7	51982.4	32155.3	104754	110720	52790.3	119526	125331	188196	66547	176591	37696.5	146956	114204	122428	49.63	56963	43437.8	56.64	2	1	0.0104118	1.98	0.0771942	1.38499	348.238	520.2	8.7	Up
M349T304	270843	331372	275417	195810	276744	153452	196720	149306	451160	417908	503897	422142	612537	585824	402001	464726	482524	457943	16.36	231208	233781	28.7	2.09	1.06	0.0001554	3.81	0.00610078	2.12488	349.106	304.3	5.1	Up
M349T427	370915	460340	280954	984818	1.12443e+06	355037	197679	307044	3.48967e+06	3.49691e+06	5.68016e+06	264098	3.53482e+06	1.24951e+06	2.06193e+06	5.17203e+06	3.11864e+06	3.49329e+06	59.36	510152	362976	67.9	6.11	2.61	0.00699301	2.16	0.0602244	1.84482	349.182	427.2	7.1	Up
M349T644	1.64499e+06	944741	1.07887e+06	420633	869871	365423	387251	507798	1.7772e+06	1.96551e+06	1.81349e+06	1.53992e+06	1.81479e+06	1.51538e+06	2.0726e+06	2.29583e+06	1.84934e+06	1.81414e+06	14.12	777448	688835	57.57	2.38	1.25	0.000621601	3.21	0.0140919	1.9715	349.237	643.9	10.7	Up
M349T687	387852	101916	177365	285188	318672	211554	238568	647019	483286	1.40301e+06	426697	690555	628129	1.2297e+06	1.24904e+06	448375	819849	659342	49.47	296017	261878	56.3	2.77	1.47	0.0018648	2.73	0.0275628	1.86703	349.186	686.8	11.4	Up
M349T697	1.22925e+06	218408	1.51691e+06	2.21402e+06	1.63994e+06	563611	412437	1.1245e+06	1.89134e+06	1.99699e+06	2.03835e+06	4.46867e+06	994747	4.52724e+06	2.47671e+06	1.68959e+06	2.51046e+06	2.01767e+06	51.6	1.11488e+06	1.17687e+06	61.21	2.25	1.17	0.014763	1.83	0.0952789	1.51757	349.276	697.3	11.6	Up
M349T772	888051	959344	1.48398e+06	901453	1.49875e+06	1.70135e+06	1.13496e+06	1.41591e+06	2.50723e+06	4.09353e+06	3.08698e+06	2.40817e+06	2.24801e+06	2.23968e+06	1.33416e+06	1.3252e+06	2.40537e+06	2.32809e+06	37.49	1.24798e+06	1.27544e+06	25.3	1.93	0.95	0.0104118	1.98	0.0771942	1.80654	349.198	771.8	12.9	Up
M349T82_2	2.73087e+06	1.2782e+06	2.28943e+06	889162	2.7165e+06	2.02695e+06	2.88887e+06	1.82941e+06	768327	437829	317652	1.05117e+06	1.35841e+06	1.97398e+06	434505	1.34695e+06	961103	909747	60.2	2.08117e+06	2.15819e+06	34.71	0.46	-1.11	0.0104118	1.98	0.0771942	1.62494	348.838	82	1.4	Down
M350T105	2.19454e+06	1.5125e+06	1.95509e+06	1.28247e+06	1.64035e+06	1.45548e+06	1.4956e+06	1.68205e+06	1.26105e+06	1.37404e+06	1.50448e+06	1.41984e+06	1.37493e+06	1.88411e+06	1.43039e+06	1.0785e+06	1.41592e+06	1.39738e+06	16.21	1.65226e+06	1.57643e+06	17.81	0.86	-0.22	0.0498834	1.3	0.201689	1.0735	350.118	105.3	1.8	Down
M350T427	202367	87079.5	93707.9	264148	315636	64308.9	135220	308279	468783	517861	255964	115063	277536	449723	639052	675858	424980	459253	45.89	183843	168793	55.85	2.31	1.21	0.0206682	1.68	0.117429	1.55032	350.185	427.1	7.1	Up
M350T644	312429	46309.7	54762.7	162195	16060.3	9421.7	110162	226522	500789	405669	339814	261177	391143	170180	215858	387539	334021	363677	33.03	117233	82462.4	92.83	2.85	1.51	0.0029526	2.53	0.0361958	1.64409	350.24	643.8	10.7	Up
M351T677	174431	368971	384575	61655.6	177780	661578	453195	182644	232220	110000	39148.6	202487	79235.9	116232	33316.8	145718	119795	113116	59.77	308104	275808	63.37	0.39	-1.36	0.0379176	1.42	0.171246	1.43044	351.275	677	11.3	Down
M352T335	133430	501157	402641	202085	515756	222032	579165	345768	755646	858902	793896	538308	573550	515394	611840	676755	665536	644298	19.02	362754	374205	45.36	1.83	0.88	0.0018648	2.73	0.0275628	1.71826	351.698	335.1	5.6	Up
M352T346	223956	287878	403398	259243	572157	951435	351808	316995	127433	20740.6	161708	177342	133841	334431	253910	12832.4	152780	147775	70.81	420859	334401	57	0.36	-1.46	0.0029526	2.53	0.0361958	1.51456	352.063	346.2	5.8	Down
M352T372	181984	186685	189312	242807	182624	159132	244161	204894	262068	230764	433142	478624	268392	283988	155728	438290	318875	276190	36.38	198950	187999	15.18	1.6	0.68	0.0206682	1.68	0.117429	1.49838	352.103	371.6	6.2	Up
M352T413	153026	238250	285439	492392	184844	213293	244271	157432	70443.6	46906.4	150707	136069	62132.6	46164	57633.1	44959.6	76876.9	59882.8	54.84	246118	225772	44.41	0.31	-1.68	0.0001554	3.81	0.00610078	2.08806	352.15	413.2	6.9	Down
M352T420	19773.4	31406.4	27313.5	46517.8	39386.4	15869.5	58295.1	21812.9	294365	257932	332332	132925	99825.5	71709.6	304014	318050	226394	276148	47.2	32546.9	29359.9	44.83	6.96	2.8	0.0001554	3.81	0.00610078	2.19972	352.226	419.9	7	Up
M352T565	257187	132114	92764.1	187512	26087	12324.9	136608	190120	444369	427485	346256	298080	258665	194242	204377	376618	318761	322168	30.07	129340	134361	64.8	2.46	1.3	0.000621601	3.21	0.0140919	1.54708	352.022	565.1	9.4	Up
M352T661	179903	138473	58993	125455	87795.9	98859.1	115651	145983	296382	382932	328400	135306	339016	116443	188971	369581	269629	312391	39.61	118889	120553	31.55	2.27	1.18	0.00699301	2.16	0.0602244	1.76429	352.248	660.6	11	Up
M352T771	217597	39525.3	86041.2	36454.1	55933.1	66418.7	211946	159913	164494	217439	199346	387530	110716	306934	294772	413252	261811	256106	40.84	109228	76230	69.4	2.4	1.26	0.0104118	1.98	0.0771942	1.69098	352.283	771.4	12.9	Up
M352T80	4.26523e+06	1.46195e+06	1.65649e+06	1.58923e+06	3.91183e+06	1.46864e+06	1.60179e+06	3.83904e+06	5.90214e+06	7.15513e+06	5.19472e+06	5.15821e+06	6.75083e+06	6.42975e+06	5.8786e+06	6.3752e+06	6.10557e+06	6.13867e+06	11.61	2.47427e+06	1.62914e+06	51.55	2.47	1.3	0.0001554	3.81	0.00610078	2.11369	351.988	79.7	1.3	Up
M352T813	1.12222e+06	1.42178e+06	3.08971e+06	795644	3.07546e+06	4.81439e+06	2.01344e+06	1.24327e+06	172612	167181	248203	754814	333037	1.9508e+06	2.25967e+06	97111.8	747928	290620	115.75	2.19699e+06	1.71761e+06	62.23	0.34	-1.55	0.014763	1.83	0.0952789	1.60815	352.321	812.8	13.5	Down
M353T107	3.61541e+06	2.02173e+06	3.81278e+06	2.73321e+06	1.571e+06	1.78939e+06	4.77866e+06	3.36792e+06	1.17698e+06	153594	738433	3.65451e+06	931842	1.87996e+06	369433	709352	1.20176e+06	835137	93.29	2.96126e+06	3.05056e+06	38	0.41	-1.3	0.0104118	1.98	0.0771942	1.65925	353.108	107.4	1.8	Down
M353T174	586217	2.3623e+06	647286	765623	2.4831e+06	1.48159e+06	1.20997e+06	2.31974e+06	3.8147e+06	8.18124e+06	5.18543e+06	2.8043e+06	4.26881e+06	4.07976e+06	4.00857e+06	5.05483e+06	4.6747e+06	4.17428e+06	34.21	1.48198e+06	1.34578e+06	54.49	3.15	1.66	0.0001554	3.81	0.00610078	2.05258	353.009	173.8	2.9	Up
M354T340	1.70486e+06	1.51499e+06	2.69202e+06	2.02081e+06	2.05408e+06	2.48465e+06	3.53606e+06	2.59222e+06	129357	208406	261074	82193.5	133280	101781	136923	112801	145727	131318	40.83	2.32496e+06	2.26936e+06	27.71	0.06	-4	0.0001554	3.81	0.00610078	2.41932	354.104	340.1	5.7	Down
M354T348	618686	205715	402841	126486	525552	281585	468286	275116	759080	312186	735995	776018	668158	611203	506316	703631	634073	685894	24.77	363033	342213	46.5	1.75	0.8	0.00699301	2.16	0.0602244	1.55413	354.05	347.6	5.8	Up
M354T621	234121	206219	348346	141132	340602	185951	274363	188474	628090	476267	534948	321358	273696	480728	186353	450470	418989	463369	34.94	239901	220170	31.34	1.75	0.8	0.0281274	1.55	0.141969	1.54617	354.1	621.4	10.4	Up
M354T775_2	1.10629e+06	1.14645e+06	1.72996e+06	1.26084e+06	1.19386e+06	255138	592765	1.5392e+06	1.83904e+06	1.82768e+06	2.01572e+06	1.11431e+06	2.06494e+06	1.52687e+06	1.38838e+06	2.56529e+06	1.79278e+06	1.83336e+06	25.11	1.10306e+06	1.17016e+06	43.31	1.63	0.7	0.014763	1.83	0.0952789	1.37162	354.246	774.7	12.9	Up
M354T813	5.03082e+06	2.90134e+06	3.81625e+06	3.17313e+06	4.22833e+06	3.74364e+06	4.4401e+06	4.43285e+06	4.47184e+06	3.27054e+06	5.46285e+06	1.10335e+07	3.90177e+06	4.64957e+06	5.80621e+06	8.13276e+06	5.84113e+06	5.05621e+06	43.9	3.97081e+06	4.02229e+06	17.75	1.47	0.56	0.0379176	1.42	0.171246	1.23937	354.262	812.9	13.5	Up
M355T312	3.47236e+06	1.80055e+06	1.76e+06	3.20313e+06	2.40891e+06	989796	1.75384e+06	1.34497e+06	1.63198e+06	1.07368e+06	1.84016e+06	1.77134e+06	1.0624e+06	192375	871158	955228	1.17479e+06	1.06804e+06	47.02	2.09169e+06	1.78027e+06	41.69	0.56	-0.83	0.0498834	1.3	0.201689	1.29338	355.094	311.6	5.2	Down
M356T348	2.15829e+06	1.30774e+07	2.34693e+06	3.07092e+06	1.2454e+06	873513	981277	1.53975e+06	986816	997572	427743	585135	640701	538614	357352	353911	610980	561874	42.02	3.16168e+06	1.84902e+06	128.92	0.19	-2.37	0.0018648	2.73	0.0275628	1.83586	355.546	347.7	5.8	Down
M356T363_1	523969	4.09376e+06	5.03018e+06	381248	4.51127e+06	4.28797e+06	5.98287e+06	4.09805e+06	2.0867e+06	43144.9	1.82535e+06	3.192e+06	1.59379e+06	212994	47339	185815	1.14839e+06	903393	103.81	3.61366e+06	4.19301e+06	56.65	0.32	-1.65	0.0104118	1.98	0.0771942	1.34424	355.595	362.9	6	Down
M356T568	745954	135682	246609	635222	480711	258575	892257	124855	818216	2.69075e+06	5.22436e+06	1.23563e+06	387902	522766	1.86949e+06	2.60902e+06	1.91977e+06	1.55256e+06	83.46	439983	369643	66.55	4.36	2.13	0.0104118	1.98	0.0771942	1.66366	356.241	568.5	9.5	Up
M357T119	8.86913e+06	9.29639e+06	6.55007e+06	9.95789e+06	6.1615e+06	5.52267e+06	7.5537e+06	7.61519e+06	1.1961e+06	5.92353e+06	1.30674e+06	6.05267e+06	803334	918839	1.02153e+06	4.41042e+06	2.70415e+06	1.25142e+06	86.55	7.69082e+06	7.58444e+06	20.54	0.35	-1.51	0.000621601	3.21	0.0140919	1.89963	357.022	119	2	Down
M357T768	859175	552283	204944	890190	167425	261399	784338	1.1339e+06	1.41904e+06	1.62052e+06	1.0236e+06	547851	1.63856e+06	1.20192e+06	894226	1.3643e+06	1.21375e+06	1.28311e+06	31.02	606707	668311	60.08	2	1	0.00699301	2.16	0.0602244	1.51173	357.281	767.7	12.8	Up
M357T771	376511	730143	533602	690117	444593	499850	532818	801590	475774	168458	355035	420360	329607	604112	604932	178147	392053	387698	43.02	576153	533210	25.76	0.68	-0.56	0.0498834	1.3	0.201689	1.30017	357.219	770.7	12.8	Down
M358T587	1.54701e+06	373142	504044	2.71058e+06	823079	1.30318e+06	444239	2.39631e+06	1.13125e+06	3.49671e+06	1.84162e+06	2.96691e+06	2.62374e+06	4.38651e+06	4.66553e+06	3.75279e+06	3.10813e+06	3.23181e+06	39.2	1.2627e+06	1.06313e+06	71.43	2.46	1.3	0.00699301	2.16	0.0602244	1.68353	358.233	587.2	9.8	Up
M359T348	665329	261904	579197	314176	384526	351802	682789	657680	889226	924403	927645	1.2036e+06	982951	894263	569998	887478	909945	909333	18.98	487175	481861	36.15	1.87	0.9	0.0018648	2.73	0.0275628	1.90276	359.045	347.6	5.8	Up
M359T425	62400.7	29300	257534	111708	76002.9	232346	367106	208855	442387	452884	479885	630121	328214	250169	172678	254112	376306	385301	40.18	168156	160282	69.46	2.24	1.16	0.014763	1.83	0.0952789	1.5676	359.482	425.1	7.1	Up
M359T587	254841	273198	397219	830870	191169	191429	301156	703323	476129	483314	447059	1.00849e+06	779943	401020	599322	1.03776e+06	654129	541318	39.16	392901	287177	61.69	1.66	0.74	0.0281274	1.55	0.141969	1.37223	359.237	587.2	9.8	Up
M359T663	140222	92979.6	377772	128445	110269	104169	157669	154038	240839	226516	219339	286559	200000	130978	216994	226095	218415	222717	19.93	158195	134334	57.99	1.38	0.47	0.0281274	1.55	0.141969	1.31895	359.2	663	11.1	Up
M359T716	2.17423e+06	799331	841191	1.26404e+06	457281	326409	1.62976e+06	556704	2.39727e+06	2.43475e+06	1.92404e+06	1.73706e+06	2.10913e+06	987063	1.02536e+06	2.47424e+06	1.88611e+06	2.01659e+06	31.88	1.00612e+06	820261	63.48	1.87	0.91	0.014763	1.83	0.0952789	1.46044	359.253	715.8	11.9	Up
M359T81_1	2.15186e+07	1.7258e+07	1.39562e+07	2.24547e+07	8.04914e+06	6.41436e+06	1.6606e+07	2.18833e+07	3.4344e+07	3.91125e+07	2.5221e+07	2.52351e+07	3.18884e+07	1.87304e+07	1.92969e+07	4.2593e+07	2.95527e+07	2.85618e+07	29.98	1.60175e+07	1.6932e+07	38.63	1.85	0.88	0.004662	2.33	0.0475536	1.61373	358.833	81	1.4	Up
M360T114	1.01983e+07	3.11967e+06	4.2402e+06	5.37455e+06	2.89781e+06	2.84666e+06	1.24752e+07	4.38414e+06	1.47457e+07	1.45372e+07	3.93371e+06	1.45004e+07	1.50333e+07	1.37648e+07	1.3701e+07	4.02237e+06	1.17798e+07	1.41326e+07	41.06	5.69206e+06	4.31217e+06	63.95	2.07	1.05	0.0206682	1.68	0.117429	1.4062	360.105	113.5	1.9	Up
M360T348_1	8.41461e+06	8.06453e+06	6.55923e+06	6.66285e+06	6.03119e+06	6.12391e+06	8.17966e+06	7.68115e+06	3.13844e+06	298673	390968	3.61212e+06	2.9451e+06	4.59024e+06	376180	4.5025e+06	2.48178e+06	3.04177e+06	74.65	7.21464e+06	7.172e+06	13.49	0.34	-1.54	0.0001554	3.81	0.00610078	1.745	359.548	347.6	5.8	Down
M360T425	6984.29	1843.98	6867.6	4099.47	7896.93	1102.56	1645.24	2926.16	407008	1.10379e+06	301509	6133.95	271069	84830.9	533740	489594	399710	354259	84.69	4170.78	3512.81	65.24	95.84	6.58	0.0010878	2.96	0.0203124	2.18374	359.732	424.8	7.1	Up
M361T320	65763.4	336750	69697.6	308244	334346	16733	50647.4	59282.7	539937	1.22422e+06	1.17071e+06	318256	525483	139721	455416	812274	648252	532710	60.12	155183	67730.5	92.13	4.18	2.06	0.0029526	2.53	0.0361958	1.73289	361.442	320	5.3	Up
M361T371	8113.32	1680.07	109601	27548.6	134075	13411.6	2216.14	13848.4	213539	865446	290133	401926	243692	303257	613003	21883.6	369110	296695	70.79	38811.7	13630	134.73	9.51	3.25	0.0010878	2.96	0.0203124	1.89156	361.106	370.8	6.2	Up
M361T488	878578	3.59447e+06	4.67256e+06	1.81627e+06	5.93801e+06	5.57224e+06	1.58411e+06	8.19368e+06	1.15911e+07	8.56528e+06	6.74476e+06	6.6664e+06	4.57136e+06	1.98524e+07	6.59187e+06	5.67389e+06	8.78213e+06	6.70558e+06	56.33	4.03124e+06	4.13351e+06	62.74	2.18	1.12	0.014763	1.83	0.0952789	1.53235	361.139	488	8.1	Up
M361T550_2	435237	186281	444534	256089	498293	151249	590511	86534.2	1.0861e+06	414257	1.4689e+06	982320	397684	210616	671201	643603	734334	657402	57.02	331091	345663	55.66	2.22	1.15	0.0498834	1.3	0.201689	1.35862	361.15	550.3	9.2	Up
M361T89	1.15059e+07	2.84252e+06	957416	8.28833e+06	5.88771e+06	5.6522e+06	1.62876e+06	3.48802e+06	3.26535e+07	1.44916e+07	5.11053e+06	2.16844e+07	3.41153e+07	3.06349e+06	6.9232e+06	2.04405e+07	1.73103e+07	1.7466e+07	69.54	5.03136e+06	4.57011e+06	70.87	3.44	1.78	0.0281274	1.55	0.141969	1.47266	361.127	89.2	1.5	Up
M362T571	3.34852e+06	4.0224e+06	3.06703e+06	2.28846e+06	1.53785e+06	2.54818e+06	2.69755e+06	2.19963e+06	4.23595e+06	5.67652e+06	2.3835e+06	6.5394e+06	4.07152e+06	5.05123e+06	4.19579e+06	2.76132e+06	4.3644e+06	4.21587e+06	31.88	2.7137e+06	2.62286e+06	28.19	1.61	0.69	0.0104118	1.98	0.0771942	1.47375	362.217	571.4	9.5	Up
M362T577	193299	1.09477e+06	22691.2	992518	424570	175679	100025	17421.7	1.15918e+06	1.34935e+06	2.10268e+06	612632	1.00863e+06	186136	1.48165e+06	502491	1.05034e+06	1.08391e+06	58.41	377622	184489	114.21	2.78	1.48	0.014763	1.83	0.0952789	1.40115	362.254	576.7	9.6	Up
M362T661	358179	549223	676539	631502	273797	242606	485472	391425	543014	440979	897055	822070	1.0049e+06	867632	734862	552709	732902	778466	27.33	451093	438448	35.67	1.62	0.7	0.014763	1.83	0.0952789	1.52879	362.175	660.8	11	Up
M362T699	1.25714e+06	248228	180723	894191	226236	282226	571820	645331	886792	2.76902e+06	1.22145e+06	1.4044e+06	2.14928e+06	613609	1.10828e+06	2.67806e+06	1.60386e+06	1.31293e+06	51.28	538237	427023	71.3	2.98	1.58	0.00699301	2.16	0.0602244	1.76551	362.216	698.5	11.6	Up
M362T717	205151	537372	585199	197657	228520	166776	260276	259204	245996	779057	337540	741302	776636	385078	381549	338615	498221	383313	45.31	305019	243862	53.02	1.63	0.71	0.0379176	1.42	0.171246	1.23905	362.216	717.3	12	Up
M362T89	1.90185e+06	2.50214e+06	1.58503e+06	2.02518e+06	1.62439e+06	1.10311e+06	1.27251e+06	1.49719e+06	2.08492e+06	3.13124e+06	2.99309e+06	2.28283e+06	1.69694e+06	2.68447e+06	2.60095e+06	3.24256e+06	2.58962e+06	2.64271e+06	20.83	1.68892e+06	1.60471e+06	26.37	1.53	0.62	0.0029526	2.53	0.0361958	1.70077	362.13	89.3	1.5	Up
M363T100	2.08169e+06	2.18946e+06	3.12883e+06	2.06163e+06	1.63476e+06	893697	3.04507e+06	2.71593e+06	1.16623e+06	679030	1.15231e+06	1.9407e+06	837084	1.29981e+06	484853	1.32476e+06	1.1106e+06	1.15927e+06	40.67	2.21888e+06	2.13558e+06	33.64	0.5	-1	0.004662	2.33	0.0475536	1.68769	362.986	99.8	1.7	Down
M363T105	194223	100019	213535	141052	396530	226805	430503	398126	498908	452845	647251	562434	478505	399354	388095	456584	485497	467544	17.6	262599	220170	48.61	1.85	0.89	0.0018648	2.73	0.0275628	1.80014	363.187	104.8	1.7	Up
M363T442_3	40315.4	87842.3	133242	129598	139598	2723.46	119432	16510.8	525477	293554	834573	199025	402874	341222	307191	716656	452572	372048	49.16	83657.7	103637	66.91	5.41	2.44	0.0001554	3.81	0.00610078	1.7894	363.488	442.3	7.4	Up
M363T797_1	1.64403e+07	1.36081e+07	1.84864e+07	2.43582e+07	2.5421e+07	2.59295e+07	2.01794e+07	2.16591e+07	2.43676e+07	3.10371e+07	5.15045e+07	2.8301e+07	3.3033e+07	2.50448e+07	4.67018e+07	2.5246e+07	3.31545e+07	29669038	31.3	2.07603e+07	2.09193e+07	21.35	1.6	0.68	0.004662	2.33	0.0475536	1.7561	362.799	796.9	13.3	Up
M363T797_2	3.92561e+06	2.6828e+06	1.80632e+06	4.65207e+06	5.7094e+06	2.41229e+06	3.68515e+06	4.31796e+06	4.67388e+06	5.7185e+06	3.21694e+06	3.75927e+06	6.54177e+06	4.79596e+06	7.24398e+06	5.8646e+06	5.22686e+06	5.25723e+06	26.2	3.64895e+06	3.80538e+06	35.33	1.43	0.52	0.0281274	1.55	0.141969	1.34531	363.301	797	13.3	Up
M364T351_2	246568	226846	262987	300448	361570	239460	376332	224878	384622	500416	289213	544293	349705	449105	455695	506091	434892	452400	20	279886	254778	21.47	1.55	0.64	0.0029526	2.53	0.0361958	1.8516	364.194	351	5.8	Up
M364T565	612367	637873	301071	822118	73155.5	37503.1	432107	571103	1.8475e+06	1.31648e+06	757493	1.16076e+06	1.12996e+06	497967	952293	2.51521e+06	1.27221e+06	1.14536e+06	50.4	435912	501605	64.18	2.92	1.55	0.0029526	2.53	0.0361958	1.5336	364.05	565.1	9.4	Up
M365T704	1.22228e+06	1.31325e+06	943920	857937	2.53492e+06	436160	2.10455e+06	646890	2.79304e+06	2.2091e+06	7.50204e+06	3.29715e+06	3.99412e+06	2.13306e+06	5.79722e+06	2.1735e+06	3.7374e+06	3.0451e+06	52.47	1.25749e+06	1.0831e+06	57.5	2.97	1.57	0.0010878	2.96	0.0203124	1.87859	365.254	704.1	11.7	Up
M366T222	1.18091e+06	1.32497e+06	2.01522e+06	1.26671e+06	1.97908e+06	1.83926e+06	1.72534e+06	1.49082e+06	1.02221e+06	837425	1.73291e+06	1.0711e+06	759411	1.51139e+06	1.25599e+06	730399	1.11511e+06	1.04666e+06	32.52	1602788	1.60808e+06	20.6	0.7	-0.52	0.0206682	1.68	0.117429	1.48298	365.978	221.7	3.7	Down
M366T417_1	144208	400577	718692	392350	121730	91220.6	204499	298940	893754	424295	775306	715757	251312	419515	547252	1.0346e+06	632725	631504	42.18	296527	251719	70.12	2.13	1.09	0.0104118	1.98	0.0771942	1.50612	365.917	416.9	6.9	Up
M366T704	473629	188016	228253	253822	416552	166364	289546	133668	384035	953696	2.35671e+06	609022	714513	447088	519546	841879	853311	661767	74.72	268731	241037	44.78	3.18	1.67	0.0010878	2.96	0.0203124	1.87643	366.257	704.1	11.7	Up
M366T782	440643	536297	1.24708e+06	873032	804797	703426	876061	1.54485e+06	1.29134e+06	2.16623e+06	1.42612e+06	1.20288e+06	616544	1.70322e+06	1.01681e+06	1.9396e+06	1.42034e+06	1.35873e+06	35.49	878274	838915	41.39	1.62	0.69	0.0379176	1.42	0.171246	1.38609	365.697	782.3	13	Up
M367T355	946927	971724	1.02402e+06	1.13033e+06	947305	1.01981e+06	996861	1.06621e+06	1.25465e+06	1.472e+06	1.26939e+06	1.26173e+06	1.20909e+06	1.20456e+06	1.12141e+06	1.40205e+06	1.27436e+06	1.25819e+06	8.82	1.0129e+06	1.00833e+06	6.18	1.26	0.33	0.0003108	3.51	0.00894927	2.11534	367.198	355.2	5.9	Up
M367T384	6.60746e+06	2.79336e+06	8.69317e+06	1.69785e+06	8.41266e+06	6.37246e+06	1.33335e+07	2.03976e+06	1.51129e+07	2.52106e+07	2.12367e+07	9.12626e+06	1.11563e+07	5.87654e+06	1.35857e+07	8.467e+06	1.37215e+07	1.2371e+07	48.29	6.24378e+06	6.48996e+06	63.88	2.2	1.14	0.014763	1.83	0.0952789	1.52965	367.149	384.4	6.4	Up
M368T565	535402	106002	211854	397040	30445.7	15608	341401	402073	716522	1.24155e+06	635617	443910	916787	449335	327215	1.03095e+06	720236	676070	44.48	254978	276628	75.54	2.82	1.5	0.004662	2.33	0.0475536	1.52386	368.065	565.1	9.4	Up
M368T720	206708	459320	226488	495566	119158	220964	320875	309832	323797	563509	266814	483559	447288	517190	500308	772479	484368	491934	31.71	294864	268160	43.85	1.64	0.72	0.014763	1.83	0.0952789	1.39979	368.264	720.2	12	Up
M368T757	819918	2.99029e+06	4.5646e+06	1.66514e+06	5.30391e+06	1.10089e+07	2.5495e+06	3.11632e+06	133578	77661.9	240619	555288	108399	2.92626e+06	2.6729e+06	32464.9	843396	187098	144.66	4.00233e+06	3.0533e+06	79.36	0.21	-2.25	0.004662	2.33	0.0475536	1.73947	368.351	757.2	12.6	Down
M368T80	921765	888485	910518	900635	767848	2.65344e+06	798683	790381	879621	5.64079e+06	2.58734e+06	1.03871e+06	2.93499e+06	3.96519e+06	4.00311e+06	5.13603e+06	3.27322e+06	3.45009e+06	53.41	1.07897e+06	894560	59.23	3.03	1.6	0.00699301	2.16	0.0602244	1.73804	367.963	80.5	1.3	Up
M368T82	2.76412e+06	3.62299e+06	4.50994e+06	2.8333e+06	6.27916e+06	8.25348e+06	3.53476e+06	3.50966e+06	1.75093e+06	1.18347e+06	2.48362e+06	2.41632e+06	2.27199e+06	3.94616e+06	3.47219e+06	1.06352e+06	2.32353e+06	2.34416e+06	43.66	4.41342e+06	3.57887e+06	43.39	0.53	-0.93	0.00699301	2.16	0.0602244	1.55557	368.097	82.4	1.4	Down
M369T104	802777	1.42625e+06	692921	642830	791385	423922	695838	549545	958626	1.65449e+06	1.98885e+06	1.47367e+06	692674	1.40622e+06	1.46548e+06	1.93449e+06	1.44681e+06	1.46958e+06	30.74	753183	694379	39.7	1.92	0.94	0.00699301	2.16	0.0602244	1.73503	369.095	104.3	1.7	Up
M369T746	2.04673e+06	5.34157e+06	2.38811e+06	4.39162e+06	1.89897e+06	3.67713e+06	3.61921e+06	5.02439e+06	6.20472e+06	5.41826e+06	5.34925e+06	1.16234e+07	5.81807e+06	2.766e+06	4.93529e+06	2.88901e+06	5.6255e+06	5.38375e+06	48.73	3.54847e+06	3.64817e+06	37.58	1.59	0.66	0.0379176	1.42	0.171246	1.1652	369.283	746.2	12.4	Up
M369T767	781756	880354	738834	381131	2.41536e+06	2.30266e+06	543004	1.08283e+06	283530	178791	467962	260499	232188	445717	908668	57306.8	354333	272015	73.62	1.14074e+06	831055	68.47	0.31	-1.69	0.00699301	2.16	0.0602244	1.61397	369.225	766.9	12.8	Down
M370T101	695608	269016	391884	710561	324925	56551.1	251450	329179	498538	780721	602773	661918	785435	609229	568355	657175	645518	633202	15.38	378647	327052	58.89	1.7	0.77	0.0379176	1.42	0.171246	1.399	370.253	100.9	1.7	Up
M370T119	1.78916e+06	1.71304e+06	250835	1.54036e+06	1.86067e+06	1.89015e+06	387855	1.91285e+06	2.57969e+06	1.85221e+06	1.96799e+06	2.2488e+06	2.75376e+06	2.07834e+06	2.51655e+06	2.0302e+06	2.25344e+06	2.16357e+06	14.52	1.41812e+06	1.7511e+06	48.61	1.59	0.67	0.0010878	2.96	0.0203124	1.30171	370.027	118.5	2	Up
M370T375	263317	1.54149e+06	1.57737e+06	312604	1.14442e+06	1.268e+06	286410	394107	1.48135e+06	1.64742e+06	1.57977e+06	487259	1.57632e+06	1.72468e+06	1.67682e+06	1.40341e+06	1.44713e+06	1.57805e+06	27.75	848465	769264	69.4	1.71	0.77	0.014763	1.83	0.0952789	1.30311	370.136	375	6.2	Up
M370T654_2	3.31772e+06	2.52549e+06	4.35973e+06	2.80736e+06	3.38698e+06	2.95482e+06	3.10987e+06	3.64346e+06	2.457e+06	1.82392e+06	2.37128e+06	2.87186e+06	1.73877e+06	3.54532e+06	3.3691e+06	914378	2.38645e+06	2.41414e+06	36.98	3.26318e+06	3.2138e+06	17.32	0.73	-0.45	0.0498834	1.3	0.201689	1.25147	370.309	653.8	10.9	Down
M371T115	427605	276575	370685	532860	371907	289229	419695	475734	699467	1.01236e+06	1.0785e+06	454881	494092	517018	585024	435854	659650	551021	38.3	395536	395801	22.11	1.67	0.74	0.004662	2.33	0.0475536	1.65312	370.973	114.6	1.9	Up
M371T644	122553	55598.7	47245.8	87019.1	102652	46964.4	32054.2	60977.6	104701	61294	84680.5	119632	124970	69666.8	165275	112790	105376	108746	31.83	69383.1	58288.1	45.22	1.52	0.6	0.0379176	1.42	0.171246	1.33025	371.291	644.3	10.7	Up
M371T661	413349	309649	369530	278329	383921	283929	420732	465231	765070	631948	590662	400676	459340	430919	408216	704741	548947	525001	26.07	365584	376725	18.79	1.5	0.59	0.0104118	1.98	0.0771942	1.70748	371.233	660.8	11	Up
M371T700	118564	183109	357897	119950	501304	656004	284457	178251	22013.7	10158.2	81977.9	104741	19081.4	199398	119431	3983.38	70098.1	51995.8	98.5	299942	233783	64.83	0.23	-2.1	0.0029526	2.53	0.0361958	1.69358	371.299	700.3	11.7	Down
M371T72	1.48966e+06	1.3751e+06	1.39417e+06	1.58437e+06	1.15771e+06	1.12159e+06	1.47676e+06	1.42745e+06	2.0045e+06	2.22463e+06	1.86237e+06	1.74281e+06	2.04214e+06	1.75971e+06	1.80309e+06	2.28429e+06	1.96544e+06	1.93344e+06	10.62	1.37835e+06	1.41081e+06	11.69	1.43	0.51	0.0001554	3.81	0.00610078	2.11757	370.888	71.7	1.2	Up
M372T117	543165	824883	494269	1.05515e+06	3.13333e+06	1.95211e+06	368000	1.81564e+06	2.13694e+06	2.08888e+06	4.07285e+06	2.20368e+06	1.74209e+06	3.76627e+06	5.2892e+06	5.05432e+06	3.29428e+06	2.98497e+06	43.38	1.27332e+06	940017	75.23	2.59	1.37	0.004662	2.33	0.0475536	1.77204	372.058	117.1	2	Up
M372T66	2.3165e+06	2.40792e+06	2.00156e+06	2.21844e+06	2.03476e+06	2.45151e+06	2.66454e+06	2.97635e+06	1.91121e+06	1.70945e+06	1.7001e+06	1.87803e+06	2.11073e+06	1.71969e+06	1.54166e+06	2.07711e+06	1.831e+06	1.79886e+06	10.83	2.38395e+06	2.36221e+06	13.59	0.77	-0.38	0.0018648	2.73	0.0275628	1.88115	372.099	66.5	1.1	Down
M372T730	1.79567e+06	1.58375e+06	1.74083e+06	1.83433e+06	1.47385e+06	1.19726e+06	1.66864e+06	1.1624e+06	2.09972e+06	4.17805e+06	1.57138e+07	3.21776e+06	3.91443e+06	2.20815e+06	5.32196e+06	2.81168e+06	4.93319e+06	3.56609e+06	90.94	1.55709e+06	1.62619e+06	16.69	3.17	1.66	0.0001554	3.81	0.00610078	1.83211	372.274	730.2	12.2	Up
M372T771	1.04107e+06	301736	768817	284688	440059	1.04777e+06	1.09099e+06	1.52536e+06	1.18088e+06	592753	1.12551e+06	1.67051e+06	903554	2.06383e+06	1.91756e+06	1.48518e+06	1.36747e+06	1.33303e+06	37.1	812562	904945	54.51	1.68	0.75	0.0379176	1.42	0.171246	1.33168	372.2	771.4	12.9	Up
M372T779	1.50924e+06	1.84739e+06	1.0539e+06	1.87684e+06	812498	972608	1.35356e+06	908118	828275	867982	638480	710928	540873	1.08748e+06	749723	550349	746761	730326	24.35	1.29177e+06	1.20373e+06	32.55	0.58	-0.79	0.004662	2.33	0.0475536	1.80888	372.3	778.8	13	Down
M372T797_2	1.22477e+08	1.10555e+08	1.14237e+08	1.13156e+08	1.60974e+08	5.08521e+07	1.09655e+08	1.09447e+08	1.6352e+08	2.2873e+07	6.78181e+07	5.5611e+07	8.06359e+07	3.33113e+07	1.04667e+08	8.50281e+07	7.6683e+07	7.4227e+07	57.71	1.11419e+08	1.11856e+08	26.85	0.69	-0.54	0.0498834	1.3	0.201689	1.1605	372.31	797.3	13.3	Down
M372T813_1	1.58312e+07	1.52468e+07	2.23984e+07	1.61304e+07	1.48536e+07	1.74787e+07	2.00277e+07	2.05871e+07	3.47609e+07	2.74816e+07	3.136e+07	3.45055e+07	3.01849e+07	1.61941e+07	2.08164e+07	3.16518e+07	2.83694e+07	3.07724e+07	23.37	1.78192e+07	1.68046e+07	15.85	1.59	0.67	0.0029526	2.53	0.0361958	1.82878	371.634	812.6	13.5	Up
M373T106	555942	728469	568614	309836	784970	468338	631370	491670	1.07277e+06	1.28676e+06	1.49746e+06	888177	789601	804186	809208	1.00242e+06	1.01882e+06	945297	25.26	567401	562278	26.59	1.8	0.84	0.0001554	3.81	0.00610078	1.92115	373.073	106.4	1.8	Up
M373T117	2.44748e+06	1.70958e+06	2.90344e+06	2.91385e+06	1.46527e+06	1.62109e+06	3.49433e+06	2.73921e+06	581753	500647	1.04022e+06	616617	527148	201299	443129	439726	543817	513898	43.6	2.41178e+06	2.59335e+06	30.5	0.23	-2.15	0.0001554	3.81	0.00610078	2.23806	373.058	117	2	Down
M373T493	197563	109593	169260	130033	360229	112654	384598	121553	525090	389265	348119	494929	335262	242984	295391	141257	346537	341691	36.39	198185	149647	56.42	1.75	0.81	0.0379176	1.42	0.171246	1.44411	373.244	493	8.2	Up
M374T100	997962	1.46385e+06	1.04487e+06	1.45123e+06	1.20371e+06	705196	1.52032e+06	1.22992e+06	1.01644e+06	302837	1.26524e+06	1.16779e+06	745114	927143	531448	847011	850378	887077	37.69	1.20213e+06	1.21682e+06	23.23	0.71	-0.5	0.0498834	1.3	0.201689	1.25479	374.178	100.2	1.7	Down
M374T123	1.77447e+06	1.48336e+06	1.75678e+06	1.50647e+06	1.87797e+06	1.60934e+06	1.96574e+06	1.61118e+06	1.81724e+06	2.59855e+06	1.98786e+06	2.27682e+06	1.94007e+06	2.13729e+06	1.94092e+06	2.45923e+06	2.14475e+06	2.06258e+06	12.92	1.69816e+06	1.68398e+06	10.24	1.26	0.34	0.0018648	2.73	0.0275628	1.83558	374.12	123.2	2.1	Up
M374T385	363685	322181	281870	401067	225183	188680	359040	309378	487096	382540	371251	470579	438583	396734	291056	354364	399026	389637	16.17	306386	315780	23.51	1.3	0.38	0.0281274	1.55	0.141969	1.36083	374.174	385.3	6.4	Up
M374T427	399508	533312	772769	576341	1.18737e+06	1.90187e+06	587388	734449	178868	198777	146535	350530	360186	847321	716347	110084	363581	274654	75.77	836626	660918	58.65	0.43	-1.2	0.0206682	1.68	0.117429	1.53998	374.263	427	7.1	Down
M374T774_1	1.32639e+07	6.0724e+06	5.98496e+06	1.04676e+07	4.68517e+06	7.31713e+06	7.03699e+06	1.01358e+07	1.36081e+07	1.24464e+07	2.03945e+07	7.91294e+06	1.51851e+07	1.15968e+07	5.33121e+06	1.87869e+07	1.31577e+07	1.30273e+07	38.55	8.12049e+06	7.17706e+06	35.57	1.62	0.7	0.0379176	1.42	0.171246	1.296	374.289	773.8	12.9	Up
M375T609	900027	912703	746415	1.04637e+06	772150	371047	644996	530856	182041	18339.6	218771	420957	92545.4	185367	100837	105163	165503	143602	73.49	740570	759282	29.73	0.22	-2.16	0.0003108	3.51	0.00894927	2.01798	375.192	608.7	10.1	Down
M375T78_2	455628	380884	387933	481204	302935	265721	458102	430183	575417	631225	520380	541736	603252	540513	568120	676663	582163	571769	9	395324	409058	19.54	1.47	0.56	0.0001554	3.81	0.00610078	1.96505	375.25	77.8	1.3	Up
M375T79	6.88216e+06	1.44958e+06	2.70565e+06	1.07548e+06	1.27776e+06	1.10079e+06	2.55213e+06	1.15764e+06	5.08539e+06	6.58877e+06	3.30684e+06	6.84027e+06	4.51715e+06	2.94631e+06	1.47693e+06	1.9746e+06	4.09203e+06	3.912e+06	49.05	2.27515e+06	1.36367e+06	86.69	1.8	0.85	0.0379176	1.42	0.171246	1.26692	374.972	79	1.3	Up
M376T311	626259	536578	745833	906760	706723	269361	760626	852518	1.07601e+06	1.20509e+06	1.01672e+06	655057	950126	758346	1.02302e+06	1.17463e+06	982375	1.01987e+06	19.49	675582	726278	29.85	1.45	0.54	0.0104118	1.98	0.0771942	1.44681	376.171	310.8	5.2	Up
M376T333	3.91566e+06	685191	1.10737e+06	2.62554e+06	5.46192e+06	917082	861980	1.03717e+06	3.41209e+06	5.15899e+06	4.54555e+06	4.23717e+06	3.97003e+06	3.09744e+06	2.19724e+06	3.839e+06	3.80719e+06	3.90451e+06	23.98	2.07649e+06	1.07227e+06	85.22	1.83	0.87	0.0498834	1.3	0.201689	1.56432	375.607	333.3	5.6	Up
M376T387	620967	816056	763006	854633	811387	707411	746598	627017	695843	1.79929e+06	1.25832e+06	1.68722e+06	1.33133e+06	2.18234e+06	1.62397e+06	2.22779e+06	1.60076e+06	1.6556e+06	31.57	743384	754802	11.65	2.15	1.11	0.004662	2.33	0.0475536	2.01059	376.185	387	6.4	Up
M376T416_2	188697	137036	112255	146725	21863.3	41413	108873	57762.3	204945	310644	1.17518e+06	816345	348455	167450	127808	279367	428775	295005	86.33	101828	110564	56.23	4.21	2.07	0.0018648	2.73	0.0275628	1.69431	376.268	416.2	6.9	Up
M376T698	3.04205e+06	196526	144007	366934	224402	135295	2.00028e+06	416427	1.0254e+06	2.93237e+06	1.04397e+06	545507	2.95205e+06	1.68283e+06	2.26159e+06	2.06251e+06	1.81328e+06	1.87267e+06	49.54	815740	295668	134.03	2.22	1.15	0.0379176	1.42	0.171246	1.52642	376.305	697.5	11.6	Up
[truncated: 2,525 more rows]
