# Supplementary material for: The impact of dapagliflozin for the myocardial metabolomic profiles of mice with chronic heart failure induced by a high fat diet
Source: Research Square preprint supplement (doi:10.21203/rs.3.rs-6881055/v1), 2025-06-25
Supplement: Supplementary file 15 [file de27cd537a76b808aeebe23c.xlsx]

## Sheet: normalized
Peak names	Mass-to-charge ratio	Retention indices	Retention times(min)	Chow1	Chow2	Chow3	Chow4	Chow5	Chow6	Chow7	Chow8	DAPA1	DAPA2	DAPA3	DAPA4	DAPA5	DAPA6	DAPA7	DAPA8	HDF1	HDF2	HDF3	HDF4	HDF5	HDF6	HDF7	HDF8	QC1	QC2	QC3	QC4	QC5	QC6	QC7
M100T108	100.012	107.6	1.8	251844	308931	140275	40635.7	110973	96862.8	212549	71918.4	47959.4	52697.6	64533.9	54983.2	74419.1	92154.9	119426	52675	31884.3	124791	130505	243549	30429.9	60011.3	87864.3	25217.5	169082	119313	197654	169218	107452	155155	174629
M101T108	101.024	107.6	1.8	5.83459e+06	1.21276e+07	2.67381e+06	2.71944e+06	9.53341e+06	7.44727e+06	1.61202e+07	8.00392e+06	9.77479e+06	2.16322e+06	5.32638e+06	2.27171e+06	8.10375e+06	7.73347e+06	8.94396e+06	3.95849e+06	7.84076e+06	2.33663e+06	6.64133e+06	8.67838e+06	2.51115e+06	8.30047e+06	7.41984e+06	6.92904e+06	7.22704e+06	7.37461e+06	9.19421e+06	6.38641e+06	4.33181e+06	4.70637e+06	7.83823e+06
M101T37	100.954	36.9	0.6	168670	150143	159827	151708	118661	123731	171919	156599	147916	229650	135398	160021	169935	186428	201778	140872	150795	196287	169638	137193	193292	184118	166015	246380	141792	156660	161967	156693	160035	157543	166391
M101T387	101.061	386.6	6.4	35708.7	170062	112730	172094	117405	156788	99328.7	139553	141566	170575	117667	100705	78626.6	178667	36064.8	52511.6	109009	85544.3	128562	108880	113448	171664	86641	140721	128272	123675	125571	128442	128999	118873	93016.9
M101T57	100.954	56.8	0.9	279601	304384	273828	287911	308207	284411	339182	296682	299865	293297	326440	321597	197576	367518	307233	366982	245745	344430	359452	442520	326434	347376	298173	301938	306196	306626	309305	311609	301235	315159	306037
M101T98	101.024	97.5	1.6	6.03211e+06	1.37386e+07	7.6426e+06	9.51063e+06	9.42999e+06	1.61784e+07	1.03241e+07	1.58819e+07	1.90076e+07	6.7736e+06	1.37499e+07	8.47864e+06	7.43856e+06	8.9274e+06	8.88263e+06	1.84199e+07	8.94169e+06	1.00038e+07	1.83493e+07	1.05597e+07	8.44525e+06	7.46254e+06	1.74585e+07	8.0954e+06	8.36182e+06	8.93631e+06	5.93642e+06	8.81438e+06	8.23766e+06	9.46449e+06	8.6286e+06
M102T31	101.934	31.1	0.5	566909	252545	431757	478367	503676	258496	615279	580303	563788	238422	692801	1.10118e+06	88987.8	130671	269346	646441	408781	120928	607624	823630	538853	145009	698046	742496	525433	401713	405152	527914	471912	517626	575764
M102T38	101.952	37.8	0.6	91659.3	146850	101355	123254	104492	119476	100305	130192	143446	128675	191593	119145	126078	117462	126891	160133	257509	143998	277188	216591	171810	105593	103274	115438	122951	128204	85980.2	121655	133218	121893	126750
M102T51	101.952	51.1	0.9	289752	280140	272566	308003	286190	321796	300632	260361	353576	281370	290013	263609	252322	265698	295689	295230	337674	275248	347219	417691	277770	377475	419611	259369	236630	295621	279694	281497	281219	264590	271694
M102T80	102.056	80.5	1.3	2.85254e+07	3.30253e+07	3.00157e+07	3.15904e+07	2.98823e+07	3.16531e+07	3.67143e+07	3.6117e+07	3.25653e+07	3.0213e+07	2.97661e+07	2.95859e+07	2.97494e+07	3.02527e+07	3.22576e+07	3.51658e+07	2.88258e+07	2.89205e+07	3.34221e+07	3.00132e+07	2.94908e+07	3.37341e+07	3.47516e+07	2.89602e+07	2.90461e+07	2.88716e+07	2.81834e+07	2.91534e+07	2.41191e+07	2.91462e+07	2.86949e+07
M102T90	102.02	90.3	1.5	2.3215e+06	1.95139e+06	3.22037e+06	1.83962e+06	2.40984e+06	1.5438e+06	1.83663e+06	2.13053e+06	1.00657e+06	1.89609e+06	781460	1.60865e+06	473576	1.22508e+06	789214	918637	5.11001e+06	922498	2.31909e+06	5.56394e+06	2.54765e+06	1.60616e+06	1.17392e+06	3.03772e+06	2.50786e+06	1.89277e+06	1.77473e+06	1.92854e+06	1.93432e+06	1.78184e+06	1.77409e+06
M102T91	102.056	91.5	1.5	1.49828e+06	1.95178e+06	1.39503e+06	1.36351e+06	1.13806e+06	973433	1.54807e+06	1.43151e+06	1.07079e+06	256348	650947	1.08087e+06	442898	340728	1.2654e+06	1.16521e+06	949767	1.17203e+06	1.34327e+06	712643	1.07266e+06	1.52521e+06	1.53819e+06	854262	1.11798e+06	1.07858e+06	1.07848e+06	1.07841e+06	1.09212e+06	970847	1.09238e+06
M103T122	103.04	121.7	2	8.23003e+06	8.41196e+06	9.15905e+06	7.72538e+06	7.92583e+06	9.40415e+06	6.47358e+06	9.03417e+06	1.13359e+07	1.02865e+07	6.93444e+06	7.26898e+06	3.85763e+06	8.87017e+06	8.86592e+06	1.02213e+07	8.52793e+06	9.10444e+06	1.03909e+07	1.1665e+07	8.40327e+06	8.21585e+06	1.01116e+07	9.02918e+06	8.74656e+06	8.95579e+06	8.56809e+06	8.76024e+06	9.62895e+06	8.79249e+06	8.95673e+06
M103T286	103.004	285.8	4.8	180764	1.76128e+06	279097	273028	243043	123097	232836	65645.8	1.26106e+06	2.79157e+06	1.2331e+06	317502	1.11557e+06	1.86348e+06	1.49852e+06	3.02924e+06	23103.4	2.15096e+06	243884	147303	183695	2.75908e+06	3.87665e+06	4.09135e+06	1.53608e+06	1.59055e+06	1.53701e+06	1.69353e+06	1.62903e+06	1.62935e+06	1.62862e+06
M103T303	103.004	303.1	5.1	577074	913469	388641	522184	425376	81785.6	406974	548868	1.13961e+06	1.01399e+06	1.24731e+06	1.27372e+06	1.04744e+06	1.14786e+06	1.03645e+06	1.1178e+06	726747	805001	974183	1.69811e+06	939245	990654	1.00516e+06	981280	820551	759261	733117	839924	803450	803408	759803
M103T52	102.949	52.4	0.9	1.58356e+06	8.93276e+06	7.82156e+06	1.10476e+07	5.64365e+06	7.4177e+06	7.75069e+06	1.00711e+07	1.10563e+07	1.13175e+07	1.1469e+07	9.11882e+06	1.03861e+07	1.57732e+07	1.06765e+07	1.28673e+07	1.27332e+07	1.28974e+07	1.2468e+07	1.19838e+07	1.45232e+07	1.02809e+07	1.22434e+07	1.20418e+07	1.08575e+07	1.08401e+07	1.19374e+07	1.12928e+07	1.02693e+07	1.04971e+07	8.94448e+06
M103T54	102.933	53.7	0.9	1.88581e+06	2.95445e+06	3.18167e+06	1.78855e+06	851251	1.08354e+06	4.14904e+06	3.31177e+06	4.07931e+06	3.00889e+06	3.95907e+06	2.6576e+06	2.0441e+06	1.01889e+06	3.58834e+06	3.41302e+06	4.07195e+06	3.2694e+06	2.33944e+06	4.01916e+06	3.74263e+06	4.21916e+06	3.4636e+06	3.98975e+06	3.02594e+06	2.58272e+06	3.01973e+06	3.02329e+06	2.57967e+06	2.81302e+06	3.02286e+06
M103T69	102.934	69	1.1	566368	636472	626023	633902	631976	669819	569134	680730	227898	725855	178909	59497.2	613984	652236	238336	515517	577538	660679	702398	884027	650158	225590	235598	706306	732188	617179	712798	713529	693388	659127	713188
M103T80	103.059	80.4	1.3	77225.4	512224	4.39173e+06	1.61244e+06	937499	806956	2.32507e+06	1.13118e+06	1.48822e+06	2.8114e+06	1.98358e+06	2.7483e+06	1.34243e+06	1.4963e+06	1.66374e+06	2.8048e+06	1.03816e+06	1.34493e+06	1.15667e+06	1.51201e+06	716221	2.20185e+06	1.22276e+06	1.37816e+06	921378	1.00605e+06	985249	1.28715e+06	928986	931685	1.00203e+06
M103T83	102.957	83.3	1.4	6.08885e+07	5.59213e+07	5.67648e+07	7.67691e+07	5.65209e+07	5.00916e+07	5.96857e+07	6.95609e+07	7.59542e+07	5.20626e+07	6.70834e+07	3.81122e+07	5.47375e+07	6.16021e+07	5.95742e+07	5.85593e+07	5.98269e+07	7.87918e+07	9.95817e+07	6.8733e+07	8.40628e+07	6.52393e+07	6.68371e+07	8.76719e+07	5.77135e+07	5.87818e+07	5.81688e+07	5.7305e+07	5.96401e+07	5.80576e+07	5.7459e+07
M103T92	103.04	92.2	1.5	1.17277e+08	2.72369e+08	1.37776e+08	2.69904e+07	1.42797e+08	6.73136e+07	1.12052e+08	3.18693e+08	1.72831e+07	3.10153e+07	2.15353e+07	2.07036e+07	1.09933e+07	2.66972e+07	1.88775e+07	1.48006e+07	2.84611e+08	2.92638e+06	9.22085e+07	3.64422e+07	1.65817e+08	8.35082e+07	1.27019e+07	4.43356e+07	1.28463e+08	1.19958e+08	3.79242e+07	1.20087e+08	1.28933e+08	1.28207e+08	1.20413e+08
M103T93	103.004	92.7	1.5	2.19518e+06	2.52416e+06	2.3414e+06	2.40015e+06	2.312e+06	516273	2.35585e+06	2.52485e+06	2.33212e+06	2.36424e+06	2.41339e+06	2.41133e+06	2.44781e+06	2.2084e+06	2.54443e+06	2.54443e+06	2.21857e+06	1.73246e+06	2.49448e+06	2.4416e+06	2.22351e+06	2.04626e+06	1.72825e+06	2.09563e+06	2.44949e+06	2.32401e+06	2.30146e+06	2.32481e+06	2.27851e+06	2.31024e+06	2.27976e+06
M104T83	103.96	83.3	1.4	567242	586909	673338	781172	664971	700245	550335	606932	792825	719184	635504	681251	588123	571368	601502	620381	769906	671693	642071	648742	691604	766103	739340	703806	655545	642749	656141	603154	655333	687449	643159
M104T85	104.035	84.6	1.4	1.0502e+07	2.88103e+07	1.12207e+07	9.40154e+06	1.21498e+07	1.01331e+07	1.20409e+07	1.06822e+07	4.24077e+07	1.24144e+07	4.36107e+07	1.13944e+07	1.01366e+07	5.00654e+07	3.06846e+07	4.33148e+07	2.92648e+07	4.72017e+07	4.80354e+07	1.32066e+07	4.8652e+07	6.60149e+06	3.56896e+07	1.9145e+07	2.54207e+07	2.1442e+07	2.16295e+07	3.12104e+07	1.28753e+07	2.12735e+07	2.50029e+07
M105T74	105.019	74.2	1.2	2.15956e+06	1.57534e+06	1.72847e+06	2.11514e+06	2.06659e+06	2.13582e+06	1.16433e+06	1.41563e+06	986511	500211	1.14633e+06	1.29338e+06	1.81346e+06	1.45995e+06	2.43648e+06	1.15732e+06	855774	3.15036e+06	1.75543e+06	1.11983e+06	4.2765e+06	750099	985057	3.36846e+06	1.67089e+06	1.80084e+06	1.98906e+06	1.66612e+06	1.9787e+06	1.70086e+06	1.99139e+06
M105T82	105.019	81.7	1.4	5.66096e+07	1.19805e+07	2.82148e+07	2.69485e+07	1.22551e+07	8.07828e+07	1.13454e+08	8.88706e+07	5.33218e+07	6.24182e+07	3.1849e+07	6.18092e+07	5.0513e+07	1.48775e+07	4.74422e+07	4.73638e+07	2.00605e+07	4.03105e+07	8.79965e+07	4.57508e+07	4.17798e+07	2.45434e+07	2.34501e+07	5.37809e+07	2.9573e+07	3.41053e+07	3.26337e+07	4.54727e+07	5.02911e+07	3.50494e+07	4.4263e+07
M105T83	104.954	83.3	1.4	1.4016e+07	1.93844e+07	1.4982e+07	1.88225e+07	1.92099e+07	1.65505e+07	1.55854e+07	1.5452e+07	2.06579e+07	1.95346e+07	2.38778e+07	2.54746e+07	2.27729e+07	1.40099e+07	2.00066e+07	2.67796e+07	1.64739e+07	2.96748e+07	2.47706e+07	2.01036e+07	1.71095e+07	1.11101e+07	1.70253e+07	1.66112e+07	2.11262e+07	2.11293e+07	2.11317e+07	2.11298e+07	2.23132e+07	1.98931e+07	1.99427e+07
M105T92	105.044	92.2	1.5	615375	706518	641546	245980	1.01299e+06	758345	491598	401452	1.44473e+06	110232	799982	618803	488177	231231	344577	89514.7	135732	749212	636403	621768	387882	874202	109328	118278	464891	467093	493492	224930	492021	494241	494692
M106T434	106.04	433.9	7.2	678639	628691	411899	718380	529966	289014	1.24018e+06	736125	537023	1.25944e+06	904112	694959	403247	1.46569e+06	504168	1.03471e+06	1.5871e+06	407687	442370	631686	728110	121737	77518.7	136928	520202	519919	517332	519984	632561	600630	423101
M106T455	106.04	454.7	7.6	710214	244137	828124	237854	2.50697e+06	284831	1.72802e+06	906481	819077	1.44659e+06	779910	1.14714e+06	3.97348e+06	1.27598e+06	1.34598e+06	1.5333e+06	679622	587673	1.05118e+06	420945	608647	528063	370240	456746	926617	926688	926833	920202	927123	863747	850901
M106T482	106.04	482	8	3.01684e+06	3.22056e+06	916903	3.03478e+06	2.9358e+06	5.37691e+06	3.34138e+06	830765	3.27662e+06	1.84474e+06	3.01698e+06	1.46979e+06	1.92638e+06	2.22091e+06	780513	1.56246e+06	1.81615e+06	2.16315e+06	4.85507e+06	1.2587e+06	1.03478e+06	2.043e+06	1.86978e+06	1.7254e+06	2.44531e+06	2.86648e+06	2.73752e+06	2.73671e+06	2.74527e+06	3.00787e+06	2.9712e+06
M106T82	106.023	81.8	1.4	1.43256e+06	1.40742e+06	1.0846e+06	1.63811e+06	1.11997e+06	1.10311e+06	1.104e+06	1.31568e+06	1.01446e+06	634682	1.01505e+06	823660	1.40911e+06	1.01639e+06	1.10594e+06	1.16528e+06	1.57359e+06	1.31201e+06	1.88935e+06	1.01777e+06	945199	811456	1.18493e+06	1.12045e+06	1.15624e+06	1.18633e+06	927054	1.18654e+06	1.16779e+06	1.19324e+06	1.15471e+06
M107T472	107.05	471.6	7.9	171122	216890	198267	155936	126030	142249	228821	139807	253092	217815	206529	190355	113614	159744	141172	232886	136433	123206	178772	228145	123406	162918	237937	233482	99506.3	152098	133831	142562	98488.7	142625	164823
M107T88	106.981	88.3	1.5	1.49823e+06	1.99112e+06	1.31279e+06	1.72827e+06	1.73767e+06	1.17419e+06	1.65955e+06	1.85297e+06	1.70408e+06	3.10841e+06	2.0739e+06	1.93162e+06	2.52873e+06	1.93229e+06	2.02477e+06	2.44566e+06	1.34587e+06	2.50418e+06	2.04014e+06	1.70991e+06	2.12718e+06	1.75509e+06	1.33366e+06	2.01816e+06	1.92459e+06	2.08805e+06	1.94625e+06	1.94623e+06	1.97385e+06	1.94631e+06	2.13483e+06
M108T122	108.02	121.7	2	2.78668e+07	2.47486e+07	2.15256e+07	5.94113e+06	1.03209e+07	2.8719e+06	3.1216e+07	2.27649e+07	5.3704e+06	3.68576e+06	1.45328e+07	1.2067e+07	3.69718e+06	1.60875e+07	1.21442e+07	3.26643e+06	6.87043e+06	5.4327e+06	7.12729e+06	2.24015e+07	7.0726e+06	1.24945e+07	4.08264e+06	5.94288e+06	1.40565e+07	1.20171e+07	1.38548e+07	1.13386e+07	1.81779e+07	1.13191e+07	1.10847e+07
M108T251	108.02	250.5	4.2	272643	265098	196290	307865	229147	167414	254078	172581	184523	146453	151089	145713	269450	129216	152712	123219	259418	226782	292161	181295	178767	152975	206624	221627	199240	210154	229035	209167	209449	210929	213579
M108T336	108.046	335.7	5.6	310664	265168	357406	198239	328583	57366.9	359971	339487	121918	121092	277088	128722	35844.2	220954	119560	185954	131876	4358.63	90110.5	363093	90108.7	136296	15613.6	60823.4	190153	175415	180944	193868	193756	190101	193833
M108T456	108.046	456.3	7.6	89094.6	241791	50980.4	224447	301228	123394	142525	87373.6	289946	173044	250453	122346	374352	67972.4	178359	164706	357580	521529	639672	162404	197751	133469	377580	199229	196270	173531	204364	204230	204761	228750	196712
M108T87	108.013	86.7	1.4	6.86909e+06	1.45851e+07	7.75461e+06	1.1399e+07	1.42139e+07	4.76084e+06	5.50251e+06	1.42897e+07	6.6026e+06	3.30074e+06	4.40989e+06	1.84769e+06	6.214e+06	3.98866e+06	3.7994e+06	3.97162e+06	1.21926e+07	2.15143e+06	4.54116e+06	8.61766e+06	3.60157e+06	2.48713e+06	2.5097e+06	3.40681e+06	3.53906e+06	4.79234e+06	4.74553e+06	5.30098e+06	5.30209e+06	4.78671e+06	6.02479e+06
M108T94	108.057	93.5	1.6	27919.5	159953	200819	111771	153548	259341	175624	102132	1.42459e+06	1.44514e+06	1.69441e+06	1.4214e+06	2.07993e+06	1.54812e+06	1.82974e+06	1.42178e+06	28264.6	1.30665e+06	130693	177692	135938	1.0042e+06	1.00318e+06	1.1653e+06	729448	746568	728937	729394	828119	729616	746792
M109T122	109.041	121.7	2	2.11929e+06	1.30797e+06	1.82098e+06	1.27888e+06	1.99213e+06	1.37223e+06	2.01173e+06	1.35214e+06	1.66514e+06	1.37423e+06	1.88468e+06	1.42432e+06	1.24998e+06	1.36452e+06	1.46397e+06	1.37709e+06	1.73064e+06	1.397e+06	2.71888e+06	2.20597e+06	1.7209e+06	1.61598e+06	1.43014e+06	1.4651e+06	1.30932e+06	1.43663e+06	1.24486e+06	1.35017e+06	860556	1.28198e+06	1.39179e+06
M109T147	109.041	146.7	2.4	596837	153017	658453	571289	597955	621659	177525	617219	33111.5	33205.4	47316	30982.3	47962.5	63149.5	32525.9	43514	378773	29828.6	385373	576694	509516	348650	263980	298109	401256	167848	407141	403243	398688	379186	391701
M109T480	109.04	479.7	8	3.00399e+06	5.79699e+06	1.29656e+06	5.94641e+06	4.07678e+06	3.21492e+06	1.54192e+06	4.02967e+06	3.20259e+06	4.72318e+06	828378	3.64991e+06	663584	3.12051e+06	156874	195706	472226	278649	3.5035e+06	3.47147e+06	6.69506e+06	3.26914e+06	784680	1.27786e+06	2.31565e+06	3.4939e+06	2.53391e+06	2.84751e+06	2.57173e+06	1.62654e+06	3.35446e+06
M109T83	108.902	82.6	1.4	2.88128e+07	3.21584e+07	2.26402e+07	3.42568e+07	2.10431e+07	2.28581e+07	2.14059e+07	2.16114e+07	2.1112e+07	2.15801e+07	2.19434e+07	2.08606e+07	1.77788e+07	2.05536e+07	2.09947e+07	2.01807e+07	2.81939e+07	2.02909e+07	3.28652e+07	2.47116e+07	2.56635e+07	2.10955e+07	2.11764e+07	2.28401e+07	2.13267e+07	2.04914e+07	2.09856e+07	2.05628e+07	1.7898e+07	2.03632e+07	2.07048e+07
M109T87	109.041	87	1.4	372190	549553	3.93478e+06	2.0211e+06	363410	546609	2.29282e+06	354276	3.11195e+06	4.37212e+06	3.61617e+06	4.00951e+06	3.31729e+06	4.21321e+06	6.11735e+06	4.09565e+06	381137	3.18139e+06	486129	2.71671e+06	3.14528e+06	4.31135e+06	5.59939e+06	4.15382e+06	4.55413e+06	3.0112e+06	3.16942e+06	3.00785e+06	2.98451e+06	3.00768e+06	2.99305e+06
M110T123	110.025	123.2	2.1	1.07883e+06	1.08066e+06	1.14596e+06	1.03511e+06	1.26164e+06	925809	1.39299e+06	1.09514e+06	1.08072e+06	1.16593e+06	987770	1.14196e+06	887770	1.01521e+06	1.14773e+06	1.08114e+06	1.03557e+06	946364	1.06916e+06	1.15137e+06	1.09643e+06	1.23464e+06	965287	1.14802e+06	1.0271e+06	1.15733e+06	1.01143e+06	1.14328e+06	1.12671e+06	1.16397e+06	1.08194e+06
M110T94	110.072	93.6	1.6	1.55435e+06	1.5609e+06	1.50446e+06	1.72908e+06	1.50534e+06	1.52074e+06	1.49896e+06	1.48584e+06	1.58549e+06	1.21672e+06	1.4442e+06	1.52671e+06	1.48854e+06	1.44662e+06	1.57905e+06	1.47772e+06	1.46653e+06	1.37533e+06	1.63874e+06	1.57044e+06	1.40761e+06	1.60951e+06	1.57057e+06	1.44199e+06	1.49356e+06	1.50819e+06	1.51746e+06	1.51536e+06	1.51534e+06	1.46683e+06	1.51535e+06
M111T108	111.009	107.6	1.8	1.84875e+06	1.52305e+06	2.57646e+06	2.58724e+06	2.11072e+06	1.45979e+06	3.05065e+06	1.39288e+06	581980	1.10073e+06	1.85041e+06	3.70243e+06	4.6773e+06	1.14365e+06	1.41169e+06	1.05236e+06	1.35717e+06	1.09096e+06	2.39131e+06	498245	1.31376e+06	411184	495667	510302	2.32798e+06	3.14738e+06	2.56268e+06	2.32747e+06	1.41162e+06	2.66864e+06	1.87217e+06
M111T122	111.02	121.9	2	6.90388e+07	9.46882e+07	7.65323e+07	9.9381e+07	8.17675e+07	1.18983e+08	1.1362e+08	9.08965e+07	8.4487e+07	1.28632e+08	1.14721e+08	1.01349e+08	4.84171e+07	1.25025e+08	6.01496e+07	8.85561e+07	6.12457e+07	5.68292e+07	4.9248e+07	9.46981e+07	7.22183e+07	5.59149e+07	5.87458e+07	9.68591e+07	7.64512e+07	8.23622e+07	8.29682e+07	8.38452e+07	8.38591e+07	7.99495e+07	8.3856e+07
M111T393	111.045	393.5	6.6	4.38013e+06	7.47404e+06	6.35074e+06	6.3372e+06	6.47221e+06	5.04447e+06	5.14249e+06	5.9482e+06	4.65678e+06	705249	5.26558e+06	3.74916e+06	1.10235e+06	4.96698e+06	3.69151e+06	4.89828e+06	667717	4.57272e+06	1.10857e+06	2.40813e+06	729118	3.02076e+06	4.77828e+06	3.87047e+06	2.9e+06	2.42033e+06	2.92047e+06	2.74592e+06	2.86824e+06	2.10669e+06	2.53212e+06
M111T70	111.009	70.3	1.2	4.19629e+06	4.44938e+06	3.17909e+06	4.60251e+06	4.16662e+06	5.35116e+06	3.35902e+06	3.72206e+06	4.37966e+06	3.13892e+06	734252	3.66791e+06	4.47046e+06	3.70025e+06	3.75218e+06	4.13139e+06	1.06843e+06	3.73323e+06	4.15548e+06	3.82374e+06	3.4361e+06	5.56631e+06	6.25192e+06	3.49075e+06	1.65692e+06	3.79673e+06	3.80066e+06	4.0344e+06	4.03117e+06	4.13956e+06	3.61299e+06
M111T79	110.985	79	1.3	1.85803e+07	2.01927e+07	1.33593e+07	1.2511e+07	1.55252e+07	1.15004e+07	1.4786e+07	1.88432e+07	1.36156e+07	1.43739e+07	1.8327e+07	1.38131e+07	1.12846e+07	1.30345e+07	1.88694e+07	1.29908e+07	1.78175e+07	1.25737e+07	1.26993e+07	1.44221e+07	1.43733e+07	1.39636e+07	1.75308e+07	1.43851e+07	1.25248e+07	1.23738e+07	1.31721e+07	1.38954e+07	1.57749e+07	1.29501e+07	1.25781e+07
M111T83	110.899	82.6	1.4	1.77648e+07	3.71872e+07	1.21985e+07	1.04103e+07	4.67094e+07	1.27978e+07	1.38718e+07	2.93269e+07	5.47953e+06	1.74244e+07	8.59416e+06	8.40469e+06	6.07069e+06	1.07335e+07	2.51659e+07	3.4975e+07	1.11452e+07	1.30646e+07	7.59344e+06	2.6742e+07	1.74018e+07	1.70021e+07	1.28635e+07	3.81424e+07	1.42784e+07	1.36547e+07	1.39041e+07	1.43096e+07	7.89029e+06	1.40657e+07	1.36318e+07
M111T97_1	110.958	97.3	1.6	1.37825e+06	340727	2.17467e+06	944296	655354	1.10704e+06	1.96192e+06	1.64599e+06	651511	151123	1.30496e+06	536965	33451.7	147414	282218	155960	111908	8746.36	14080	827279	34550.4	1.03722e+06	12213.8	165156	817529	765182	703457	732074	739835	727666	727545
M111T97_2	111.02	96.6	1.6	724206	902863	965964	577210	717230	871215	940811	889065	1.51391e+07	1.53428e+07	1.51716e+07	1.64522e+07	1.63225e+07	1.61e+07	2.11111e+07	1.8793e+07	1.0794e+06	1.72434e+07	3.99283e+06	860514	5.38033e+06	1.04731e+07	1.13063e+07	2.15095e+06	6.80787e+06	6.81066e+06	6.62691e+06	6.6895e+06	5.84853e+06	6.6091e+06	6.88072e+06
M112T110	112.004	110.1	1.8	715760	1.24196e+06	1.08197e+06	662745	1.02521e+06	475257	842938	808954	70434.2	335490	325235	439388	371416	669578	590694	584167	739674	71219.8	725112	950600	848901	498602	404288	453382	643052	654977	642964	642719	654775	654756	553865
M112T121_1	112.04	121.5	2	2.0072e+06	1.62433e+06	1.81032e+06	2.00216e+06	1.33086e+06	796701	5.85676e+06	2.52306e+06	840356	2.11827e+06	1.75767e+06	1.51999e+06	107981	1.26366e+06	843867	1.42381e+06	1.54628e+06	899468	1.98757e+06	997389	2.19065e+06	1.39858e+06	1.50767e+06	955340	1.15079e+06	1.07216e+06	1.01162e+06	1.10011e+06	1.20833e+06	1.07111e+06	1.03724e+06
M112T121_2	112.052	120.8	2	3.0644e+07	2.9946e+07	2.5456e+07	2.60029e+07	2.47206e+07	2.95321e+07	2.79753e+07	2.78622e+07	2.67162e+07	2.82518e+07	3.62674e+07	3.43398e+07	2.65696e+07	3.172e+07	2.92782e+07	3.04449e+07	3.51811e+07	2.36737e+07	3.90311e+07	2.74991e+07	3.49569e+07	2.44221e+07	2.0927e+07	4.75799e+07	2.97503e+07	2.44457e+07	2.87945e+07	3.25349e+07	3.01817e+07	2.99805e+07	2.81881e+07
M112T122	112.023	121.9	2	1.00599e+06	917607	795947	902715	4.36297e+06	721230	5.22792e+06	2.83547e+06	5.1644e+06	5.03415e+06	4.68889e+06	3.9124e+06	4.18145e+06	4.29012e+06	5.02404e+06	5.51346e+06	5.56737e+06	4.53699e+06	6.8067e+06	5.10613e+06	4.58931e+06	3.92936e+06	4.07259e+06	4.19607e+06	3.5563e+06	3.54115e+06	3.97455e+06	3.48026e+06	3.47991e+06	3.47953e+06	3.47956e+06
M112T136	112.023	136.1	2.3	1.71186e+06	1.2313e+06	1.43574e+06	1.47685e+06	1.35063e+06	1.45829e+06	1.51319e+06	1.30315e+06	1.36081e+06	1.13118e+06	1.29071e+06	1.10879e+06	832486	1.19378e+06	1.47262e+06	1.15023e+06	288099	1.0672e+06	1.40383e+06	1.35892e+06	1.18926e+06	1.66324e+06	1.48365e+06	1.34181e+06	1.35447e+06	1.37224e+06	1.31656e+06	1.37098e+06	1.37217e+06	1.37638e+06	886052
M112T717	112.051	717.4	12	4.06402e+06	1.28272e+06	3.91756e+06	1.95521e+06	2.01151e+06	6.59448e+06	3.43336e+06	5.1278e+06	2.57757e+06	2.86503e+06	4.6867e+06	7.29496e+06	3.63645e+06	4.20378e+06	3.18475e+06	4.04413e+06	2.97065e+06	3.55175e+06	5.44887e+06	5.17236e+06	4.24799e+06	3.74133e+06	4.46887e+06	3.58112e+06	3.44248e+06	3.78862e+06	3.29363e+06	2.81027e+06	3.82174e+06	3.24199e+06	2.43981e+06
M112T759	112.052	758.5	12.6	1.67235e+06	990097	428323	3.66578e+06	3.93913e+06	820056	882218	500817	1.2496e+06	5.40141e+06	834090	4.48091e+06	3.82007e+06	4.407e+06	8.26395e+06	8.91185e+06	5.92301e+06	3.59687e+06	8.71424e+06	1.01166e+06	5.74106e+06	841666	6.14849e+06	4.15554e+06	3.38333e+06	2.1331e+06	1.98771e+06	3.67432e+06	3.65388e+06	3.87585e+06	4.12673e+06
M112T770	112.051	770.3	12.8	1.17878e+06	2.57574e+06	3.33717e+06	9.59604e+06	8.04076e+06	2.90318e+06	1.68535e+06	740499	1.63818e+06	2.07405e+06	4.86915e+06	1.8205e+06	3.87821e+06	3.36817e+06	5.25317e+06	4.27907e+06	6.24247e+06	3.26772e+06	1.12384e+07	5.20907e+06	5.38882e+06	7.06816e+06	8.83429e+06	2.30794e+06	6.117e+06	3.9068e+06	5.38355e+06	4.49185e+06	4.5992e+06	4.71549e+06	5.12374e+06
M112T802	112.052	801.9	13.4	514107	108554	3.14676e+06	181406	1.0516e+07	114795	6.37697e+06	1.53227e+06	2.88408e+06	4.1854e+06	1.76188e+06	3.39507e+06	1.26729e+07	7.48885e+06	3.9603e+06	4.66474e+06	3.30972e+06	2.00446e+06	2.87756e+06	1.67197e+06	901939	1.01508e+06	581217	476283	3.57309e+06	3.38783e+06	3.38539e+06	1.45294e+06	3.8629e+06	3.57098e+06	3.39085e+06
M112T819	112.052	819.1	13.7	1.65947e+06	1.10019e+07	2.34591e+06	2.55116e+06	7.9459e+06	4.00622e+06	2.03567e+06	1.94809e+06	1.47823e+07	1.75944e+07	3.6766e+06	3.88611e+06	1.90769e+07	1.30525e+07	6.6954e+06	1.06707e+07	7.64295e+06	3.08575e+07	2.89636e+07	1.47777e+07	3.01547e+06	1.84058e+06	1.14119e+07	9.7427e+06	7.38715e+06	7.74242e+06	7.02944e+06	6.89275e+06	5.13105e+06	4.2676e+06	5.05683e+06
M112T95	112.052	94.8	1.6	1.4553e+07	1.79224e+07	1.68938e+07	2.73106e+07	6.27488e+06	1.27718e+07	3.84285e+07	2.64504e+07	2.3457e+07	1.01947e+07	2.18353e+07	8.33239e+06	2.14101e+07	6.44442e+06	1.6382e+07	1.32689e+07	1.91147e+07	2.01114e+07	4.81669e+06	1.3152e+07	2.45509e+07	7.02462e+06	2.19951e+07	2.87196e+07	1.38612e+07	1.4105e+07	1.19705e+07	1.17279e+07	1.17094e+07	1.20553e+07	1.47957e+07
M113T117	112.986	117	2	1.09158e+08	1.15338e+08	1.12259e+08	1.04642e+08	9.55394e+07	1.02688e+08	1.02865e+08	9.62405e+07	1.32471e+08	1.09708e+08	1.04076e+08	1.00544e+08	6.39274e+07	8.88985e+07	7.23064e+07	1.15107e+08	9.09423e+07	6.92932e+07	1.05831e+08	1.08921e+08	8.50277e+07	1.13089e+08	1.30252e+08	1.17035e+08	7.23207e+07	7.57211e+07	6.80533e+07	7.33328e+07	7.52264e+07	7.33488e+07	7.23389e+07
M113T120	113.055	120.4	2	4.2649e+06	3.77942e+06	5.93908e+06	260700	3.42401e+06	303525	3.42043e+06	2.10395e+06	115846	118355	485714	1.02954e+06	2.05628e+06	116170	1.11185e+06	211772	1.10683e+06	612255	246194	4.13097e+06	336260	1.65536e+06	86498.4	942837	758781	716938	1.072e+06	749750	1.07058e+06	514898	902775
M113T121	113.024	120.9	2	1.15038e+06	675338	1.36049e+06	752034	1.98393e+06	1.1213e+06	2.3663e+06	1.95732e+06	2.0479e+06	2.3809e+06	2.01019e+06	1.73517e+06	1.87286e+06	1.7907e+06	2.23711e+06	2.05751e+06	1.76572e+06	1.84293e+06	2.50247e+06	2.08013e+06	1.71026e+06	1.40166e+06	1.59009e+06	1.75277e+06	1.65607e+06	1.75762e+06	1.62872e+06	1.70822e+06	1.73993e+06	1.70809e+06	1.74854e+06
M113T374	112.986	373.8	6.2	3.15185e+06	3.07723e+07	7.36828e+06	7.94968e+06	5.43821e+06	9.47387e+06	3.74696e+06	9.13116e+06	3.68954e+07	1.67368e+08	1.36799e+08	2.14969e+08	1.53607e+08	1.73868e+08	1.42392e+08	2.62598e+08	9.02182e+07	8.24257e+07	8.78218e+07	4.06465e+07	6.83377e+07	5.03431e+07	1.03405e+08	4.31974e+07	5.61834e+07	5.88783e+07	6.11077e+07	6.51682e+07	5.1873e+07	6.01592e+07	9.90031e+07
M113T696	112.984	695.7	11.6	9.97636e+06	1.59777e+08	7.80842e+07	1.67878e+08	1.55398e+08	8.44784e+07	1.16279e+08	1.50576e+08	1.63667e+08	1.41008e+08	1.43987e+08	1.47523e+08	1.37554e+08	1.48859e+08	1.29237e+08	5.88441e+07	1.38911e+08	2.40857e+07	5.94761e+07	1.26956e+08	1.48173e+08	1.85382e+08	1.96558e+08	1.21189e+08	1.215e+08	1.60857e+08	1.13182e+08	1.28493e+08	1.25173e+08	1.29396e+08	1.14188e+08
M113T719	112.985	718.6	12	3.81999e+08	3.32972e+08	3.47095e+08	3.13374e+08	2.27751e+08	1.49977e+08	2.26289e+08	2.86973e+08	2.16959e+08	1.88516e+08	2.43602e+08	2.70012e+08	2.04328e+08	3.61447e+08	1.20869e+08	3.56942e+08	4.30165e+08	3.02942e+08	5.52161e+08	2.59558e+08	2.963e+08	2.76194e+08	2.30264e+08	3.39272e+08	2.59152e+08	3.24725e+08	2.51287e+08	2.39899e+08	2.59124e+08	2.59001e+08	2.51231e+08
M113T732	112.984	732.4	12.2	2.33169e+08	1.27268e+08	2.64501e+08	8.47033e+07	2.06051e+08	1.97325e+08	2.81921e+08	1.72976e+08	2.26591e+08	2.05105e+08	2.58397e+08	7.38785e+08	1.56027e+08	2.17918e+08	3.74914e+08	2.20566e+08	6.53654e+08	1.9191e+08	2.2821e+08	3.71312e+08	1.0144e+08	3.5849e+08	6.69002e+07	3.15744e+08	1.77055e+08	1.16463e+08	1.76744e+08	2.77281e+08	1.62768e+08	1.77011e+08	1.61527e+08
M113T765	112.985	764.9	12.7	1.00456e+09	8.50483e+08	7.36495e+08	3.56294e+07	7.25039e+08	9.01262e+08	2.94403e+09	6.43796e+08	7.60436e+08	1.34581e+08	3.28164e+08	1.31814e+08	2.199e+08	1.8197e+08	3.52542e+08	1.46345e+08	5.96621e+07	2.36293e+07	9.99587e+07	4.74927e+08	1.11039e+08	4.42379e+08	3.20683e+07	4.51794e+08	5.25344e+08	3.46448e+08	4.689e+08	5.31426e+08	7.66113e+08	4.61796e+08	4.72557e+08
M113T780	112.985	779.8	13	4.20953e+08	1.00767e+09	3.29822e+08	1.00901e+09	5.40977e+08	3.63316e+08	2.94616e+08	1.35488e+08	2.46268e+08	4.94992e+07	3.35745e+08	1.17158e+08	1.48171e+08	2.74302e+07	5.89906e+07	3.63024e+07	1.06266e+08	1.74962e+08	2.30999e+08	3.01365e+08	1.64154e+08	2.60968e+07	1.0691e+08	1.4996e+08	2.19826e+08	2.31903e+08	2.09491e+08	2.33191e+08	2.04245e+08	2.46178e+08	2.0751e+08
M113T810	112.986	809.6	13.5	9.3874e+08	9.59143e+08	9.74955e+08	2.61058e+09	1.27854e+09	5.96633e+08	4.81811e+08	1.68458e+09	9.80791e+08	1.33825e+09	8.88533e+08	7.62393e+08	1.2123e+09	4.28718e+08	1.64528e+09	1.41906e+09	9.03127e+08	7.02993e+08	1.9925e+09	1.60741e+09	1.11427e+09	1.27547e+09	1.8385e+09	8.6922e+08	1.10175e+09	1.04266e+09	1.2017e+09	1.10351e+09	1.33067e+09	9.71361e+08	1.24638e+09
M113T83	112.896	82.6	1.4	3.69532e+06	2.23338e+06	3.13854e+06	2.53446e+06	3.46238e+06	1.93773e+06	2.8868e+06	2.30808e+06	2.39498e+06	2.19558e+06	3.09702e+06	2.1141e+06	2.15749e+06	2.03677e+06	2.05817e+06	2.11487e+06	3.12809e+06	2.11254e+06	3.55843e+06	3.14119e+06	2.75236e+06	2.39111e+06	2.20678e+06	3.097e+06	2.2827e+06	2.34526e+06	2.34469e+06	2.29486e+06	1.67136e+06	2.24603e+06	2.27314e+06
M113T84	112.986	84.1	1.4	1.5554e+08	9.12623e+07	9.39637e+07	3.04935e+08	1.50575e+08	2.07239e+08	1.2066e+08	1.73841e+08	3.22394e+08	2.57639e+08	3.11486e+08	2.26008e+08	2.92626e+08	3.5241e+08	1.35441e+08	3.17466e+08	4.18902e+08	3.23818e+08	8.56224e+08	1.6689e+08	4.38055e+08	1.55796e+08	4.91404e+08	4.07639e+08	1.96787e+08	2.28461e+08	2.14918e+08	2.28839e+08	1.72412e+08	2.14965e+08	2.56991e+08
M113T85	113.036	85.2	1.4	13930.1	17271.4	17399.2	16696.8	18703.6	18314.7	17871.9	18420.3	2.56575e+06	3.22362e+06	2.41147e+06	3.34937e+06	2.65327e+06	3.42218e+06	3.27267e+06	3.48057e+06	19034.4	2.64783e+06	21184.4	21202.2	19773.1	1.71949e+06	1.8999e+06	1.87386e+06	1.22814e+06	1.24007e+06	1.22915e+06	1.25761e+06	1.32602e+06	1.2431e+06	1.2578e+06
M113T90	113.024	90.2	1.5	9.77735e+06	9.61146e+06	1.17161e+07	8.03865e+06	9.78878e+06	1.13414e+07	9.43231e+06	1.13401e+07	7.95806e+06	8.69237e+06	9.73191e+06	8.45339e+06	7.98596e+06	4.23175e+06	8.02081e+06	8.22726e+06	8.40844e+06	9.64866e+06	1.09341e+07	1.18629e+07	6.5928e+06	6.51515e+06	3.78986e+06	7.98304e+06	6.51945e+06	6.5157e+06	6.70725e+06	5.15792e+06	6.69918e+06	6.51891e+06	6.70525e+06
M113T98	112.986	98.3	1.6	2.53148e+06	1.32645e+07	1.17183e+07	1.40928e+07	1.23039e+07	1.44236e+07	1.36451e+07	1.50576e+07	1.64525e+07	1.41612e+07	1.19264e+07	1.24366e+07	1.24199e+07	1.53366e+07	1.09541e+07	1.13586e+07	1.10629e+07	1.15094e+07	1.38845e+07	1.20938e+07	1.61101e+07	1.33928e+07	1.75233e+07	1.20459e+07	1.21717e+07	1.27585e+07	1.29561e+07	1.21505e+07	1.04662e+07	1.24096e+07	1.19318e+07
M114T117	113.989	117	2	3.63217e+06	3.77792e+06	1.46735e+06	790285	1.24931e+06	1.40206e+06	2.78601e+06	3.50048e+06	1.38903e+06	1.31119e+06	1.37434e+06	3.81016e+06	1.50053e+06	1.63266e+06	4.02469e+06	2.39822e+06	1.45873e+06	1.43329e+06	3.07559e+06	2.82076e+06	506640	1.86304e+06	2.90787e+06	2.70263e+06	773932	1.59829e+06	2.14039e+06	1.42708e+06	1.44684e+06	1.6088e+06	1.58637e+06
M114T122	114.056	121.6	2	2.9167e+06	5.98294e+06	2.0031e+06	189282	1.06648e+07	311960	2.30853e+06	4.03319e+06	1.89838e+06	221633	1.81739e+06	2.4056e+06	2.1932e+06	291399	278847	248547	6.16952e+06	1.81572e+06	9.25861e+06	2.58952e+06	152942	45546.1	3.41933e+06	325596	3.47942e+06	2.58754e+06	3.96752e+06	3.04387e+06	4.53947e+06	3.05804e+06	3.04314e+06
M114T709	113.989	708.9	11.8	542647	1.33278e+06	1.14105e+06	1.3691e+06	468937	529753	586576	1.11652e+06	1.14548e+06	1.6954e+06	1.87571e+06	1.89613e+06	733302	1.52857e+06	2.12907e+06	1.41659e+06	1.31438e+06	1.07093e+06	609817	1.20269e+06	660741	1.40917e+06	1.40079e+06	1.40428e+06	1.19552e+06	1.27792e+06	1.3019e+06	1.12564e+06	1.25017e+06	1.27827e+06	1.39188e+06
M114T718	113.989	718.2	12	3.35665e+06	2.90106e+06	2.42089e+06	3.33021e+06	3.59095e+06	2.67306e+06	3.20583e+06	1.92151e+06	3.24894e+06	3.86568e+06	3.15238e+06	3.01967e+06	3.55291e+06	4.30794e+06	4.62313e+06	3.01455e+06	2.81966e+06	3.77712e+06	2.85948e+06	3.63911e+06	3.30152e+06	2.95312e+06	3.55065e+06	4.67807e+06	3.4687e+06	3.24216e+06	2.73394e+06	3.34157e+06	3.13062e+06	3.121e+06	3.12771e+06
M114T742	113.989	742.2	12.4	3.87333e+06	2.48381e+06	4.74866e+06	870840	3.78941e+06	2.77638e+06	4.04535e+06	3.51767e+06	4.79786e+06	5.3051e+06	7.08527e+06	4.78796e+06	2.07851e+06	3.34729e+06	4.62461e+06	4.91109e+06	5.53092e+06	3.88308e+06	5.82978e+06	5.45109e+06	3.18288e+06	5.80851e+06	4.32336e+06	5.2102e+06	2.44945e+06	3.84488e+06	3.67839e+06	4.16039e+06	3.49934e+06	2.94315e+06	3.68949e+06
M114T767	113.989	767.2	12.8	7.2776e+06	3.61234e+06	3.91717e+06	2.78923e+06	1.67592e+06	4.37215e+06	9.63043e+06	1.01801e+07	7.68987e+06	5.17358e+06	5.83844e+06	9.84945e+06	2.51991e+06	7.64082e+06	797286	9.00919e+06	1.14088e+07	1.26372e+06	3.07599e+06	4.68526e+06	7.41697e+06	4.43005e+06	4.51547e+06	5.58857e+06	5.20024e+06	6.3256e+06	5.75411e+06	4.07293e+06	5.17829e+06	5.19642e+06	5.18887e+06
M114T80	114.02	80.3	1.3	1.70961e+06	1.46061e+06	4.95294e+06	1.76572e+06	1.66583e+06	2.75524e+06	2.98307e+06	1.7648e+06	1.28347e+06	2.23295e+06	2.16625e+06	989445	4.81731e+06	1.35935e+06	3.61637e+06	4.11215e+06	2.5361e+06	3.94642e+06	8.36332e+06	2.25753e+06	7.19818e+06	1.58833e+06	1.79092e+06	2.58261e+06	4.76564e+06	4.14743e+06	3.80404e+06	3.86174e+06	3.80213e+06	3.81476e+06	3.80285e+06
M114T84	113.989	84.1	1.4	6.81095e+06	3.52338e+06	6.23301e+06	2.90047e+06	7.70987e+06	3.53881e+06	3.31418e+06	3.14167e+06	4.64933e+06	3.59166e+06	4.93561e+06	6.53778e+06	5.4304e+06	2.27387e+06	4.75563e+06	3.02506e+06	7.4659e+06	3.85593e+06	6.38364e+06	5.08556e+06	3.07394e+06	6.33394e+06	2.86396e+06	6.76509e+06	5.64999e+06	4.01772e+06	4.61226e+06	4.39529e+06	5.47131e+06	3.59836e+06	4.61901e+06
M114T91	114.02	90.9	1.5	344158	264677	420594	84826.1	360622	254593	305047	104592	356413	328156	386319	247470	295917	305749	415413	325603	421530	99010.2	525645	417158	498684	388590	357717	548331	316584	323709	334660	316802	359336	316784	323855
M114T94	114.031	94.5	1.6	633291	545933	577359	695801	430984	323326	527420	514643	474233	510725	476649	415377	556435	616293	601621	633709	816362	911170	866686	693039	765700	590516	591130	861349	564996	565038	560867	560823	584390	548410	564987
M114T96	114.056	96.3	1.6	5.34606e+06	5.52136e+06	6.1253e+06	6.32065e+06	5.88998e+06	5.1052e+06	5.82861e+06	5.60479e+06	8.89871e+06	1.42936e+07	1.19352e+07	1.60479e+07	1.40519e+07	1.38988e+07	1.59443e+07	1.5393e+07	8.7876e+06	9.97538e+06	1.084e+07	8.96802e+06	6.34545e+06	9.66544e+06	1.15745e+07	8.99944e+06	8.69905e+06	8.82857e+06	8.2878e+06	8.0579e+06	8.83008e+06	9.22986e+06	8.82928e+06
M114T98	114.02	98.2	1.6	1.00177e+07	6.18036e+06	4.59697e+06	2.55161e+06	6.27365e+06	1.90261e+06	6.11215e+06	3.79112e+06	2.44738e+06	1.34824e+06	2.67754e+06	2.71324e+06	1.67056e+06	1.9481e+06	2.08629e+06	3.61401e+06	1.66783e+06	6.38921e+06	2.5353e+06	2.46253e+06	2.4242e+06	3.47541e+06	2.17578e+06	2.29814e+06	2.49238e+06	2.47975e+06	2.49659e+06	2.67919e+06	2.49174e+06	2.56759e+06	2.92596e+06
M115T111_1	115.004	110.8	1.8	4.41066e+06	1.73427e+07	3.24093e+06	2.22469e+07	5.09375e+06	4.09759e+06	2.9867e+06	3.10635e+06	3.1657e+06	1.52627e+06	3.02294e+06	1.75539e+06	3.41466e+06	2.08251e+06	2.02015e+06	2.78846e+06	6.30577e+06	5.00922e+06	1.02824e+07	4.94007e+06	5.42111e+06	1.62502e+06	282032	4.45438e+06	5.12006e+06	5.08583e+06	4.95514e+06	4.96501e+06	4.95123e+06	5.17399e+06	4.64221e+06
M115T111_2	115.04	111.4	1.9	3.46969e+06	3.55494e+06	3.39083e+06	3.62876e+06	3.49632e+06	2.88358e+06	3.43564e+06	2.84869e+06	4.33934e+06	3.82818e+06	4.34146e+06	3.57301e+06	3.50491e+06	4.50334e+06	1.59155e+06	3.99748e+06	2.76288e+06	3.69073e+06	4.46927e+06	3.30936e+06	3.16366e+06	3.90146e+06	3.15631e+06	3.21367e+06	3.19078e+06	3.28615e+06	3.3797e+06	3.29331e+06	3.38631e+06	3.30851e+06	3.45086e+06
M115T117	114.99	117.4	2	229776	226766	273758	256713	341929	368461	327436	311716	341812	392465	312594	391743	417874	391836	450436	368913	297561	332861	297969	324296	319014	368836	417165	346265	293834	328673	257206	339731	338851	342250	338931
M115T126	115.004	125.8	2.1	694520	817639	772265	797501	713328	747706	669401	805289	735361	852224	542443	671616	585554	646224	763445	562688	704452	726005	772059	717994	697511	740195	731946	682630	578129	591721	468439	578313	588291	588253	581073
M115T31	114.934	31.1	0.5	443880	436275	476166	403815	597671	792028	388252	558193	476177	609047	420903	483538	691445	612093	375025	475459	551582	562226	392761	453407	492498	415577	390040	469477	322319	369389	459751	371538	397615	369186	444194
M115T84	114.99	84	1.4	1.60787e+06	1.91698e+06	2.07896e+06	1.45464e+06	2.48508e+06	2.97852e+06	1.70433e+06	1.7569e+06	1.83515e+06	1.5835e+06	1.43961e+06	2.29701e+06	1.80909e+06	1.45013e+06	1.71174e+06	1.64052e+06	1.24863e+06	946847	1.34964e+06	1.52316e+06	1.06744e+06	1.92036e+06	1.60121e+06	904512	1.66922e+06	1.60511e+06	1.62022e+06	1.57323e+06	1.66713e+06	1.60507e+06	1.60529e+06
M115T91	114.989	90.6	1.5	1.37203e+06	1.50693e+06	1.39469e+06	1.52091e+06	1.50989e+06	526326	1.89377e+06	1.69204e+06	822100	881250	835887	868490	638409	1.32526e+06	971880	1.12099e+06	1.90808e+06	504139	1.77226e+06	1.62528e+06	1.57382e+06	730740	614860	808467	1.13771e+06	1.14075e+06	1.12964e+06	1.14069e+06	1.18046e+06	1.13212e+06	1.13221e+06
M116T108	116.072	108	1.8	5.7147e+07	4.87102e+07	5.20563e+07	5.26868e+07	5.19251e+07	6.44054e+07	6.48093e+07	6.79375e+07	6.51399e+07	6.70645e+07	7.00826e+07	7.7088e+07	6.29368e+07	6.33968e+07	8.47899e+07	7.3104e+07	5.44228e+07	6.24342e+07	6.66513e+07	6.71481e+07	6.49103e+07	7.17878e+07	7.42979e+07	6.02412e+07	5.40696e+07	5.8798e+07	5.81781e+07	6.77817e+07	5.96634e+07	5.82325e+07	6.29558e+07
M116T157	116.071	156.9	2.6	3.1282e+06	3.56646e+06	3.54748e+06	5.45625e+06	1.86644e+06	2.22244e+06	5.80348e+06	4.05364e+06	5.08588e+06	8.5035e+06	5.93281e+06	5.75654e+06	3.14529e+06	6.64968e+06	4.45195e+06	5.28278e+06	4.36782e+06	3.04886e+06	3.01466e+06	4.42675e+06	5.86575e+06	4.78373e+06	2.79295e+06	3.35129e+06	4.40131e+06	4.47733e+06	4.45794e+06	4.40121e+06	5.09518e+06	4.47713e+06	3.90166e+06
M116T206	116.071	205.7	3.4	1.71059e+06	2.32398e+06	1.93773e+06	1.4725e+06	1.73415e+06	1.35443e+06	1.95122e+06	2.26612e+06	2.60014e+06	1.31211e+06	1.88315e+06	5.12423e+06	3.58494e+06	1.41262e+06	1.81432e+06	2.5536e+06	1.59811e+06	4.00545e+06	3.62194e+06	2.43971e+06	1.84233e+06	1.63734e+06	5.13687e+06	3.9865e+06	1.8064e+06	1.82625e+06	2.2387e+06	1.99395e+06	1.69749e+06	1.84814e+06	1.97703e+06
M116T287	116.071	286.7	4.8	1.83737e+06	3.75316e+06	2.46069e+06	4.55778e+06	1.7564e+06	2.6586e+06	442019	4.66797e+06	2.03431e+06	1.11023e+06	2.3076e+06	2.21235e+06	805707	2.82508e+06	1.18136e+06	2.37687e+06	2.2894e+06	1.82441e+06	2.70315e+06	2.31163e+06	2.04575e+06	4.201e+06	2.08246e+06	1.88132e+06	1.31301e+06	2.21961e+06	2.3007e+06	1.92127e+06	1.00315e+06	1.9311e+06	1.4375e+06
M116T31	115.921	31.1	0.5	663619	927508	863577	833730	801590	772953	876433	894958	1.07416e+06	1.04359e+06	924759	941296	820524	931693	1.06101e+06	899999	841323	905190	998435	897436	969917	929949	1.00349e+06	958751	894056	893989	857412	893981	932633	893921	886138
M116T324	116.073	324.5	5.4	1.26732e+06	1.12655e+06	1.45182e+06	713109	1.30993e+06	1.184e+06	1.66068e+06	1.6243e+06	1.15019e+06	1.4076e+06	1.44976e+06	1.31574e+06	1.63507e+06	1.45124e+06	1.08372e+06	1.56871e+06	1.81867e+06	1.24451e+06	1.88982e+06	1.86639e+06	1.01673e+06	1.05034e+06	1.26452e+06	1.16772e+06	1.15489e+06	1.29271e+06	1.25018e+06	1.23013e+06	1.32165e+06	1.23111e+06	1.2504e+06
M116T363	116.051	363	6	550891	1.54428e+06	908378	1.48344e+06	1.31222e+06	160037	830361	1.01027e+06	131197	22669.2	178332	23027.9	189287	81777.3	18876.2	46721	1.00567e+06	120621	774849	1.01408e+06	786702	17972	136152	170406	543025	536972	525195	524338	501676	435334	536843
M116T532	116.073	532.3	8.9	990176	2.09693e+06	831090	2.34173e+06	1.39574e+06	1.50879e+06	1.35672e+06	1.47894e+06	1.64326e+06	827055	1.45644e+06	1.76739e+06	1.8371e+06	774338	766005	1.15511e+06	863216	1.60821e+06	2.03134e+06	1.38538e+06	1.52371e+06	972406	867962	742658	1.37306e+06	1.30353e+06	1.10183e+06	1.30314e+06	1.44966e+06	1.60001e+06	1.39138e+06
M116T549	116.073	548.9	9.1	6.45026e+06	5.85676e+06	5.08264e+06	5.50968e+06	5.71446e+06	3.67131e+06	5.41443e+06	3.94966e+06	3.24715e+06	4.40273e+06	5.3825e+06	4.28868e+06	2.62973e+06	4.31724e+06	4.50709e+06	5.45923e+06	5.6752e+06	1.89142e+06	4.41574e+06	4.86621e+06	3.99869e+06	4.69313e+06	4.32362e+06	6.72418e+06	3.35673e+06	4.88459e+06	4.06442e+06	3.91313e+06	4.20417e+06	4.07324e+06	4.20968e+06
M116T565	116.071	565.5	9.4	1.32736e+06	1.21701e+06	3.91035e+06	3.98236e+06	1.24525e+06	3.30351e+06	1.18171e+06	1.16125e+06	3.16231e+06	3.98437e+06	5.13366e+06	3.55242e+06	2.10341e+06	3.42786e+06	3.45e+06	3.81165e+06	4.36544e+06	2.95617e+06	4.01324e+06	5.19754e+06	4.33214e+06	4.0967e+06	3.44658e+06	3.73421e+06	3.49987e+06	4.01951e+06	3.56131e+06	3.42415e+06	2.72921e+06	3.56689e+06	3.45763e+06
M116T590	116.073	589.8	9.8	2.84263e+06	2.1911e+06	2.09808e+06	2.84018e+06	1.57557e+06	766765	2.10689e+06	2.24461e+06	2.55098e+06	2.37061e+06	2.23223e+06	1.76926e+06	1.59777e+06	3.6464e+06	2.03896e+06	2.34136e+06	2.45006e+06	2.98484e+06	2.32492e+06	2.46916e+06	1.51341e+06	2.53422e+06	2.49029e+06	3.28911e+06	2.78259e+06	2.4258e+06	2.40972e+06	2.5508e+06	2.37358e+06	2.57334e+06	1.97847e+06
M116T660	116.073	660.3	11	2.3334e+06	4.58673e+06	3.57786e+06	3.49647e+06	2.81999e+06	2.8658e+06	2.81962e+06	3.33165e+06	2.64085e+06	3.44408e+06	4.06321e+06	3.5384e+06	3.18781e+06	3.63273e+06	1.97638e+06	1.34445e+06	3.34769e+06	3.19806e+06	3.71682e+06	3.2765e+06	3.52588e+06	2.71407e+06	2.8474e+06	1.61256e+06	3.28902e+06	2.19818e+06	3.33995e+06	3.56833e+06	3.29823e+06	3.27416e+06	3.75247e+06
M116T675	116.071	675.3	11.3	2.24656e+06	1.2996e+06	4.20127e+06	2.42443e+06	2.75875e+06	3.64348e+06	3.33701e+06	2.31692e+06	1.10623e+06	1.25254e+06	1.36343e+06	906442	665214	792392	986325	667666	1.14248e+06	1.13506e+06	891547	1.62278e+06	757531	1.36904e+06	1.2868e+06	721358	1.89183e+06	1.90247e+06	1.98073e+06	1.75232e+06	1.98494e+06	2.31992e+06	1.89278e+06
M116T696	116.071	696.5	11.6	4.93451e+06	3.89858e+06	3.11572e+06	3.93243e+06	4.85759e+06	2.95402e+06	4.85417e+06	3.40709e+06	1.33528e+06	2.2752e+06	2.66339e+06	1.98908e+06	779820	2.07231e+06	2.00713e+06	2.10853e+06	4.03805e+06	1.3729e+06	4.67415e+06	5.57558e+06	5.1173e+06	1.99707e+06	1.72543e+06	2.31155e+06	3.22786e+06	3.2926e+06	3.08052e+06	3.22686e+06	3.29269e+06	2.8014e+06	3.44664e+06
M116T732	116.071	732	12.2	4.2505e+06	5.06349e+06	3.53063e+06	3.85373e+06	2.65881e+06	3.6152e+06	1.79759e+06	3.5081e+06	1.43862e+06	3.11077e+06	2.70209e+06	2.15382e+06	1.94975e+06	1.39077e+06	2.14475e+06	1.83112e+06	2.21461e+06	1.79798e+06	1.09549e+06	1.88098e+06	2.76028e+06	1.93584e+06	2.61444e+06	1.22697e+06	2.6692e+06	2.6631e+06	2.66908e+06	2.56482e+06	1.75464e+06	2.54524e+06	2.52241e+06
M116T751	116.073	751	12.5	4.5726e+06	1.86778e+06	5.01444e+06	5.20689e+06	3.09076e+06	2.60715e+06	5.46645e+06	1.69359e+06	5.22611e+06	2.89918e+06	6.82539e+06	2.96827e+06	5.5572e+06	2.5409e+06	4.68315e+06	3.52279e+06	1.95976e+06	2.30752e+06	7.77785e+06	1.60122e+06	7.17531e+06	5.04688e+06	6.11319e+06	5.31285e+06	4.12068e+06	3.74341e+06	2.25654e+06	3.75203e+06	2.32724e+06	3.74405e+06	3.36185e+06
M116T766	116.072	766.4	12.8	5.09119e+06	2.95444e+06	3.3734e+06	3.44455e+06	5.74418e+06	4.54035e+06	3.04066e+06	5.68523e+06	6.89109e+06	1.56474e+06	5.86271e+06	5.34114e+06	6.35424e+06	3.08456e+06	4.26161e+06	4.66429e+06	2.63962e+06	2.36734e+06	5.92964e+06	2.85524e+06	4.31599e+06	5.27351e+06	2.95902e+06	4.1543e+06	3.25495e+06	3.24578e+06	2.70257e+06	3.80047e+06	3.65428e+06	3.28839e+06	3.61446e+06
M116T91	116.035	90.6	1.5	1.00383e+07	1.52516e+07	4.58499e+06	3.3231e+06	3.93312e+06	2.39459e+06	7.70926e+06	3.41189e+06	5.5074e+06	3.42117e+06	3.44243e+06	4.88316e+06	6.34887e+06	5.07869e+06	5.58817e+06	5.09636e+06	3.26403e+06	7.10602e+06	4.7895e+06	4.15519e+06	3.8824e+06	5.71941e+06	4.54342e+06	4.93742e+06	4.42413e+06	7.31242e+06	4.52155e+06	4.53203e+06	4.55894e+06	4.44822e+06	5.07188e+06
M116T99	116.035	99.2	1.7	1.18015e+06	2.50955e+06	1.27008e+06	2.06185e+06	3.6666e+06	4.64938e+06	1.05602e+06	2.79665e+06	5.57658e+06	2.55732e+06	2.99601e+06	2.59459e+06	1.84655e+06	3.80915e+06	1.65215e+06	2.23824e+06	2.93313e+06	2.60363e+06	3.00933e+06	3.50263e+06	4.79209e+06	4.33494e+06	3.96952e+06	6.37728e+06	2.80079e+06	3.05601e+06	2.79984e+06	3.05173e+06	3.04878e+06	2.97502e+06	3.05046e+06
M117T107	117.019	107.3	1.8	1.99086e+06	3.72358e+06	2.8406e+06	4.73053e+06	2.5768e+06	1.13643e+06	1.38932e+06	2.87355e+06	1.49797e+06	1.22533e+06	2.07884e+06	1.45103e+06	1.15616e+06	1.69546e+06	880684	1.27255e+06	5.31075e+06	982569	3.12236e+06	3.73133e+06	3.47692e+06	1.23869e+06	1.67997e+06	1.50099e+06	2.32925e+06	2.50829e+06	2.2745e+06	2.32958e+06	2.3334e+06	2.2697e+06	2.20617e+06
M117T122	117.056	121.6	2	1.5909e+07	4.006e+06	1.14239e+07	9.64303e+06	1.11501e+07	913180	3.32575e+06	2.27122e+06	1.28324e+07	1.12173e+07	1.8114e+07	1.36303e+07	1.91082e+07	1.76141e+06	1.62315e+06	3.11912e+06	1.47867e+07	1.26843e+07	3.11379e+07	2.75772e+06	3.26057e+06	1.27493e+06	1.65594e+07	1.46189e+07	1.20434e+07	1.13709e+07	1.02734e+07	1.26507e+07	1.50383e+07	5.73755e+06	8.56036e+06
M117T309	116.907	309.4	5.2	704020	888234	551524	524853	747660	489401	1.01211e+06	437005	63358.7	228778	257540	275232	27995.1	145400	18943	30960.2	817458	320618	563890	266931	628642	341797	387779	620123	417017	417332	399211	417963	439102	457609	447811
M117T74_1	116.983	74.2	1.2	2.11238e+06	6.07284e+06	6.10596e+06	5.96939e+06	4.44829e+06	5.89245e+06	3.96143e+06	9.28221e+06	1.40595e+07	1.388e+07	1.31349e+07	9.16328e+06	1.38763e+07	1.6423e+07	1.2014e+07	1.14645e+07	1.05683e+07	1.78513e+07	8.20882e+06	1.09145e+07	1.12047e+07	1.62592e+07	2.35602e+07	1.38653e+07	8.74984e+06	9.99232e+06	8.76353e+06	8.46322e+06	8.0634e+06	8.75427e+06	8.45272e+06
M117T74_2	117.008	74.4	1.2	1.36663e+06	1.53457e+06	1.6355e+06	563207	1.99197e+06	1.3439e+06	502519	3.50983e+06	2.05113e+06	613558	573202	610652	2.00398e+06	645104	1.77523e+06	1.55771e+06	1.86283e+06	1.73812e+06	1.76742e+06	1.77282e+06	2.57551e+06	596953	1.6555e+06	525614	1.4042e+06	1.39997e+06	1.40423e+06	1.40127e+06	1.09835e+06	1.45112e+06	959139
M117T77	117.019	76.5	1.3	9.17299e+06	9.35841e+06	8.93706e+06	2.24292e+06	7.04356e+06	8.40418e+06	6.77056e+06	9.49513e+06	2.30521e+07	2.28907e+06	6.22719e+06	5.09524e+06	6.39199e+06	2.38375e+06	7.55399e+06	3.96027e+06	6.81214e+06	8.45743e+06	5.61543e+06	1.71357e+07	9.78988e+06	9.80127e+06	2.35388e+07	8.36454e+06	7.08378e+06	9.32235e+06	8.35037e+06	6.49239e+06	8.33683e+06	8.01732e+06	9.33326e+06
M117T92	117.019	91.5	1.5	3.34954e+06	3.64921e+06	3.74552e+06	3.34353e+06	3.25565e+06	3.5194e+06	3.32464e+06	3.23614e+06	3.61211e+06	3.5832e+06	3.63294e+06	3.76072e+06	3.5288e+06	3.06739e+06	3.93416e+06	3.25255e+06	3.42621e+06	3.50432e+06	4.26602e+06	4.09955e+06	3.48267e+06	3.88819e+06	3.96842e+06	3.47391e+06	3.49181e+06	3.50677e+06	3.50654e+06	3.56879e+06	3.56651e+06	3.50801e+06	3.8107e+06
M118T118	118.059	117.9	2	390240	429576	334318	525312	436684	28480.9	248901	588186	285545	441912	339739	443067	333343	740595	401500	378939	649715	272340	564444	400446	716915	185731	323346	563401	370157	404063	363091	363082	362793	369947	351670
M118T31	117.928	31.1	0.5	785731	840301	880913	749868	694258	608285	602325	693090	863793	826869	845023	833958	599120	629483	806192	770191	991414	773688	1.17385e+06	782311	898274	603157	897530	676780	872114	872132	809006	859948	872248	872231	787765
M118T374	118.066	374.1	6.2	170370	65998.2	206648	46139.1	190995	64000.5	214470	169566	183250	194100	116476	208955	118061	211225	209478	273317	110045	192451	50397.4	176625	176449	152721	169520	199878	169935	151866	167617	150093	170501	192142	167693
M118T557	118.03	557.2	9.3	162575	358401	40871.8	276478	369541	121969	157787	339039	13073.7	19148.4	10594.9	42750.1	792332	7574.25	5064.43	5167.25	228408	1.48926e+06	477000	7289.73	208150	50117.2	46355.9	553165	297388	288455	297471	330229	297675	235753	297717
M118T88	118.051	87.8	1.5	4.3769e+07	3.94991e+07	3.59289e+07	3.95977e+07	3.00195e+07	2.93879e+07	4.58342e+07	2.84064e+07	6.5704e+07	1.10167e+08	8.61572e+07	7.86799e+07	7.37981e+07	1.0311e+08	6.45101e+07	1.0559e+08	6.88272e+07	7.33195e+07	4.32745e+07	4.78223e+07	5.56982e+07	6.82808e+07	1.04556e+08	9.24712e+07	7.25891e+07	8.53989e+07	7.24454e+07	8.47526e+07	9.06433e+07	7.91865e+07	8.46552e+07
M119T148	119.05	147.7	2.5	20037	27382.2	38786.6	32798	34362.6	25172.7	30083.6	19251.5	30072.3	39207.2	49859.4	31057.3	37326.6	28402.4	27638.2	23799.5	32401.3	37509.2	29898.7	30686.5	27768.6	28561	27816.4	23109	27195	30468.5	27989.9	28524.4	25507.7	28544.8	27302.3
M119T220	119.037	219.9	3.7	1.18002e+07	9.91077e+06	3.69753e+06	9.68839e+06	1.2116e+07	9.69605e+06	5.05586e+06	8.14616e+06	8.59298e+06	3.52337e+06	7.15853e+06	2.11335e+06	4.59641e+06	1.4401e+07	6.73041e+06	3.24175e+06	1.14128e+07	8.41376e+06	2.91571e+07	9.54511e+06	5.6342e+06	3.23268e+06	2.16321e+06	1.08652e+07	5.68371e+06	7.61028e+06	4.8802e+06	4.97358e+06	4.95781e+06	5.63539e+06	4.98539e+06
M119T309	118.904	309.3	5.2	265609	486248	431450	897220	544162	728771	246367	528451	473340	580587	565005	270692	567585	533200	532512	502545	413588	193754	546435	427789	633954	399734	101773	638785	399309	333040	382148	526984	448661	441813	404771
M119T31_1	118.9	30.8	0.5	56501.6	60246.9	61048.3	56341.1	72438.8	72836.7	61791.5	58669.6	60755.1	58818.2	59213.6	67295.1	59355.2	55855.5	60738.7	61622.4	49816.5	46766	58609.7	59632.6	49357.6	57934	56707.9	43757.6	61780.4	58832.5	58212.5	58399	58644.5	58673.9	58202.7
M119T31_2	118.927	31.1	0.5	248912	197844	233432	163716	182462	245266	220455	180767	236213	335282	190941	139528	251835	208311	187439	58348.3	176723	31421	32146.1	238171	48419.7	35362.3	162220	40908	200892	188548	187763	201007	73295.9	192685	186363
M119T74	118.999	74.2	1.2	2.88392e+06	4.21546e+06	3.97707e+06	4.21023e+06	3.3616e+06	4.96356e+06	933171	5.56638e+06	3.83437e+06	2.29916e+06	2.5915e+06	1.40082e+06	2.61716e+06	2.69755e+06	2.89631e+06	3.35545e+06	2.62126e+06	2.74294e+06	3.30615e+06	4.11439e+06	3.06393e+06	1.69189e+06	3.25624e+06	2.63371e+06	4.10909e+06	4.10746e+06	4.12175e+06	3.95486e+06	3.93709e+06	4.19047e+06	3.07747e+06
M119T83	118.931	83.4	1.4	8.34836e+06	6.30906e+06	1.3059e+07	5.99599e+06	6.04719e+06	8.45814e+06	5.95808e+06	1.04692e+07	4.38262e+06	6.55319e+06	8.53584e+06	7.95518e+06	5.45344e+06	1.22198e+07	5.81421e+06	6.07807e+06	7.33136e+06	1.00472e+07	6.31981e+06	3.69417e+06	7.58235e+06	4.41165e+06	1.44244e+07	3.79846e+06	7.42663e+06	7.40656e+06	8.56017e+06	7.47471e+06	6.46253e+06	9.06809e+06	9.61573e+06
M119T88	119.054	87.8	1.5	2.74912e+06	4.1971e+06	3.45963e+06	2.58047e+06	3.5399e+06	2.31537e+06	2.36905e+06	3.49089e+06	2.14884e+06	2.49314e+06	2.42558e+06	2.89815e+06	4.05796e+06	2.59295e+06	1.97786e+06	3.45774e+06	1.9884e+06	2.61386e+06	2.8642e+06	4.42039e+06	2.50641e+06	3.60279e+06	1.77682e+06	4.30825e+06	3.29959e+06	3.27232e+06	3.27241e+06	3.30987e+06	3.43896e+06	3.27557e+06	3.27305e+06
M119T90	119.035	90.2	1.5	9.60809e+06	9.36829e+06	8.69477e+06	8.92144e+06	9.18158e+06	5.07328e+06	9.63661e+06	4.76515e+06	1.73386e+07	3.21119e+07	2.84925e+07	1.45641e+07	1.99724e+07	1.02646e+07	1.70692e+07	2.01339e+07	8.10833e+06	1.87866e+07	8.78384e+06	5.01147e+06	9.20771e+06	2.26411e+07	1.77385e+07	9.13273e+06	6.08999e+06	7.19252e+06	7.2164e+06	7.2263e+06	7.65963e+06	7.81698e+06	8.13696e+06
M120T104	120.013	104.3	1.7	177976	203800	230816	288491	278033	244959	195866	241333	320770	273623	261735	205738	184053	217217	201472	388395	224840	186250	294559	311295	216357	339043	311093	247503	194653	224354	249229	218245	224025	218244	218050
M121T108	121.03	107.5	1.8	989716	1.16458e+06	1.06772e+06	1.17899e+06	1.05088e+06	1.20185e+06	2.63872e+06	1.04482e+06	1.15912e+06	1.30111e+06	1.12169e+06	1.29873e+06	1.07196e+06	1.19484e+06	1.18034e+06	1.12748e+06	1.08644e+06	1.18897e+06	1.4132e+06	1.28049e+06	1.1431e+06	1.24091e+06	1.13966e+06	1.31132e+06	1.07138e+06	1.12684e+06	1.15147e+06	1.14998e+06	1.14046e+06	1.11291e+06	1.14079e+06
M121T257	121.029	257	4.3	1.35837e+07	1.52061e+07	1.94434e+07	1.90642e+07	1.65024e+07	1.72974e+07	1.64937e+07	1.51615e+07	1.98475e+07	1.66908e+07	1.71048e+07	1.748e+07	1.82391e+07	1.46019e+07	2.05963e+07	1.6704e+07	9.68929e+06	1.09403e+07	1.59565e+07	1.81482e+07	1.64039e+07	2.01297e+07	2.02435e+07	1.25643e+07	1.73717e+07	1.79092e+07	1.79202e+07	1.72803e+07	1.6644e+07	1.79376e+07	1.71929e+07
M121T286	121.041	285.6	4.8	115191	10774	176814	171450	151962	24743.2	167951	34546.2	89494.9	171698	162666	120582	143642	100909	312720	123547	123953	17548.2	167939	162610	138281	62969.6	81011	217451	108514	106984	107322	111357	54461.3	108353	88994.9
M121T456	121.041	455.8	7.6	555629	1.0111e+06	897875	1.47039e+06	982172	306519	893927	367144	119497	114432	439850	168023	1.08921e+06	339191	213377	154411	780059	210855	850712	689182	782203	363346	457673	203949	908549	550382	578979	549501	550085	618325	563734
M121T494	121.029	493.6	8.2	9.8499e+06	1.09125e+08	4.97002e+07	1.27441e+08	1.3748e+07	1.39718e+07	2.12735e+07	1.05341e+08	1.69945e+07	6.78894e+06	1.71777e+07	1.76405e+07	8.00995e+06	1.9519e+07	1.69633e+07	1.25512e+07	1.58922e+07	5.87472e+06	7.9757e+07	1.29793e+08	1.80574e+07	1.25228e+07	6.3295e+06	5.25355e+07	1.19554e+07	1.21285e+07	1.15924e+07	1.35769e+07	1.34785e+07	2.22466e+07	1.36431e+07
M121T83	120.928	83.4	1.4	3.46221e+06	3.83128e+06	3.74822e+06	3.11488e+06	1.23044e+06	2.38372e+06	173273	2.06117e+06	2.03355e+06	3.61753e+06	2.74712e+06	2.5645e+06	2.44556e+06	3.52909e+06	2.60875e+06	2.51021e+06	2.16478e+06	3.20211e+06	2.16553e+06	2.81862e+06	2.76901e+06	2.8509e+06	2.81348e+06	2.56532e+06	2.89503e+06	2.65523e+06	2.76437e+06	3.35415e+06	2.82885e+06	2.78193e+06	2.90232e+06
M122T257	122.034	257.3	4.3	482429	890536	560988	756046	538719	528436	636298	851557	312748	221872	238938	94765	47343.5	463958	115579	333769	980705	180791	571312	373202	774976	327105	392319	705483	567265	765706	763894	764914	654335	771667	539089
M122T433	122.036	433.5	7.2	646715	2.22291e+06	125336	1.62041e+06	638722	651950	357931	144434	411079	90883.1	1.02947e+06	96609.4	377161	73670.4	101650	78867	696312	822655	798360	96173.4	168545	108901	612128	654702	268533	687396	579116	482505	685144	594593	659111
M122T454	122.036	454.5	7.6	1.55785e+06	2.43699e+06	1.52842e+06	2.95076e+06	1.02475e+06	490387	1.17051e+06	1.14886e+06	577009	384610	902872	409175	600272	400633	582362	438080	1.57871e+06	623267	1.10122e+06	1.64854e+06	395226	413592	265291	974537	982618	1.00124e+06	1.02848e+06	1.10197e+06	999494	998741	1.07659e+06
M122T494	122.034	493.6	8.2	1.33811e+06	2.06255e+06	1.64875e+06	2.22428e+06	1.47423e+06	995190	1.41124e+06	1.56894e+06	904009	1.20903e+06	777832	804430	382146	1.36054e+06	1.25663e+06	802724	1.01926e+06	874947	829835	1.61266e+06	1.39594e+06	1.2215e+06	809639	1.38617e+06	1.21695e+06	1.17309e+06	1.12656e+06	1.14834e+06	1.21694e+06	1.21687e+06	1.21712e+06
M123T113	123.02	112.7	1.9	155215	62073.1	239207	161729	135176	55676.1	297855	151361	27960.2	209328	6051.8	174030	123923	8091.1	250172	2635.56	261011	149939	362767	166361	265215	233881	125993	213950	173312	181179	154473	178053	177966	141967	176753
M123T374	122.976	374.4	6.2	146375	364409	341194	323666	109305	559987	379465	340355	441357	309826	319701	379513	371791	294154	425594	125667	399493	529816	325238	267506	342273	366172	468918	173146	182968	254259	310216	267449	244046	278738	147774
M123T81	122.976	81.3	1.4	1.59102e+07	1.51589e+07	1.3417e+07	1.27213e+07	1.49894e+07	8.60777e+06	1.40887e+07	1.31952e+07	1.27119e+07	1.6077e+07	1.70332e+07	2.52953e+07	1.3592e+07	1.50048e+07	1.56866e+07	1.85723e+07	2.01792e+07	1.37337e+07	1.82526e+07	1.51323e+07	1.45664e+07	1.31132e+07	1.28109e+07	2.08473e+07	1.37506e+07	1.37297e+07	1.44216e+07	1.37818e+07	1.38034e+07	1.36899e+07	1.79295e+07
M123T91	122.976	90.6	1.5	1.87018e+06	1.31111e+06	2.10678e+06	1.90489e+06	3.03446e+06	1.59958e+06	2.19511e+06	1.7616e+06	2.00937e+06	516722	2.41633e+06	1.89545e+06	3.54532e+06	2.09724e+06	2.68333e+06	2.84496e+06	3.02952e+06	4.51653e+06	5.52993e+06	3.62254e+06	2.33507e+06	2.49224e+06	2.26598e+06	2.51378e+06	3.38386e+06	2.8326e+06	2.72871e+06	2.80911e+06	2.73371e+06	2.26221e+06	2.73364e+06
M124T108	124.007	107.6	1.8	4.56364e+07	4.68498e+07	8.55374e+07	3.68823e+07	3.23315e+07	1.60943e+07	4.63091e+07	1.02218e+07	4.02599e+07	1.48497e+07	1.70479e+07	2.52353e+07	1.05008e+08	3.32615e+07	2.57424e+07	4.09649e+07	4.29595e+07	8.11377e+07	5.31352e+07	2.38094e+07	2.05053e+07	2.73879e+07	1.20366e+07	1.91264e+08	4.72714e+07	5.82594e+07	4.89175e+07	4.87922e+07	4.54825e+07	5.87505e+07	6.67348e+07
M124T116	123.902	115.8	1.9	126681	1.34835e+06	810340	784290	212890	1.12225e+06	870633	747987	1.08846e+06	52666.7	125166	711710	1.00293e+06	717177	781738	516761	1.06151e+06	1.1397e+06	1.03682e+06	889880	1.62392e+06	1.42249e+06	1.6937e+06	1.19694e+06	855767	1.10896e+06	978985	889550	1.01339e+06	1.01325e+06	994860
M124T363	124.006	363.1	6.1	1.16817e+06	1.15752e+06	1.09995e+06	1.20548e+06	1.02457e+06	1.25441e+06	1.09676e+06	285325	891301	934727	1.04467e+06	972607	1.07707e+06	1.02252e+06	1.11639e+06	990669	1.42695e+06	803608	1.36147e+06	1.03196e+06	838155	1.28403e+06	1.20018e+06	973142	1.06047e+06	1.04159e+06	1.18547e+06	1.18607e+06	1.1848e+06	1.18383e+06	1.18351e+06
M124T53	123.902	52.5	0.9	4.30261e+06	4.31374e+06	4.13326e+06	4.46379e+06	2.72718e+06	3.94438e+06	4.18322e+06	4.67009e+06	5.43209e+06	3.84319e+06	4.41208e+06	3.68418e+06	4.43204e+06	5.57976e+06	3.9644e+06	5.40313e+06	4.88037e+06	4.26887e+06	7.08452e+06	4.95176e+06	5.67163e+06	4.00398e+06	5.22169e+06	4.18383e+06	4.23436e+06	4.35084e+06	4.31419e+06	4.2354e+06	4.43354e+06	4.31559e+06	3.7884e+06
M124T68	124.007	68.2	1.1	548399	6.60895e+06	697001	619208	540536	644298	2.05283e+06	537969	7.34955e+06	3.15181e+06	2.72776e+06	2.22301e+06	2.306e+06	2.36238e+06	2.9668e+06	819065	581425	839402	511136	628438	2.19833e+06	2.07464e+06	604046	3.16624e+06	1.2611e+06	2.52392e+06	2.51236e+06	2.50587e+06	3.1725e+06	2.72019e+06	2.81539e+06
M124T74	124.007	74.5	1.2	6.83482e+06	6.25287e+06	8.69302e+06	6.73826e+06	8.25721e+06	5.6973e+06	5.97597e+06	4.41691e+06	7.74828e+06	1.26588e+07	9.68724e+06	1.14658e+07	8.73912e+06	9.99356e+06	1.27707e+07	7.4892e+06	7.36605e+06	8.48579e+06	6.93879e+06	1.39839e+06	6.19076e+06	1.11761e+07	1.07824e+07	1.29698e+07	7.10635e+06	7.10735e+06	7.10534e+06	8.28918e+06	7.77724e+06	7.11192e+06	6.99879e+06
M124T86_1	124.008	86.1	1.4	2.09556e+09	2.58917e+09	2.11818e+09	1.97722e+09	1.80744e+09	1.93047e+09	2.06143e+09	1.90115e+09	2.07472e+09	2.20772e+09	1.9532e+09	2.04671e+09	1.9279e+09	2.0548e+09	2.21728e+09	2.05361e+09	1.89113e+09	2.02716e+09	2.87041e+09	2.65798e+09	2.0178e+09	2.19883e+09	2.08981e+09	1.89543e+09	1.85e+09	2.07884e+09	2.00092e+09	2.02895e+09	2.0291e+09	2.00035e+09	2.00084e+09
M124T86_2	124.044	86.2	1.4	1.00415e+06	969786	1.13592e+06	1.19498e+06	1.02176e+06	1.05543e+06	971900	934410	1.04209e+06	1.10529e+06	1.19559e+06	1.0114e+06	1.07884e+06	1.04873e+06	775789	1.16298e+06	1.03228e+06	1.08997e+06	1.16821e+06	1.09499e+06	1.10911e+06	1.2232e+06	1.04707e+06	1.12119e+06	1.11743e+06	1.09965e+06	1.09984e+06	1.14031e+06	1.11655e+06	1.11315e+06	1.06861e+06
M125T104	125.018	104.4	1.7	4.61338e+06	8.60953e+06	5.38521e+06	2.20232e+06	4.8923e+06	4.9816e+06	6.53054e+06	4.91946e+06	8.33697e+06	4.63172e+06	9.14185e+06	3.91214e+06	1.19082e+06	3.05393e+06	2.41393e+06	2.5132e+06	1.93644e+06	1.43922e+06	1.77965e+06	5.03367e+06	3.21526e+06	7.50199e+06	5.36418e+06	2.21952e+06	4.3278e+06	4.41388e+06	4.49367e+06	4.36854e+06	4.32703e+06	4.16506e+06	4.33434e+06
M125T114	124.992	113.9	1.9	4513.95	5859.07	4932.36	7606.36	8077.71	8197.8	4539.75	8069.37	238130	238653	245589	278739	146831	242702	214623	207503	2360.63	133622	2738.45	7568.14	4533.61	190070	109652	176544	106171	100592	100579	101726	100581	101724	95498.3
M125T192	125.036	191.6	3.2	461531	321394	524603	749459	531613	47714	426185	381579	602346	955790	522947	723870	652669	999491	1.20919e+06	1.36897e+06	812748	481983	1.02333e+06	564492	843390	243701	461631	572011	521281	580976	581753	569017	620780	564847	578657
M125T256	125.097	256.4	4.3	148386	242699	189637	160052	212775	185846	252478	213528	300201	310644	346451	290444	422751	225370	450288	358819	373862	336801	332940	348813	329419	276374	265106	257032	266270	273540	266267	233538	266161	271986	272295
M125T281	125.047	281.5	4.7	297416	297608	287833	257069	325467	314024	210719	263503	203867	118916	181529	130346	268992	40488.3	112221	122308	224742	176652	285862	218611	213768	239602	299119	150773	211120	243823	247759	227785	246461	246942	247333
M125T329	125.036	329.3	5.5	640179	2.55518e+06	850858	1.7748e+06	719407	972566	717992	1.97891e+06	903019	935948	5.37046e+06	1.48788e+06	652210	2.34436e+06	904906	3.59091e+06	1.02044e+06	471047	1.7211e+06	668787	2.61177e+06	742254	807071	799281	1.18048e+06	1.10905e+06	1.08189e+06	1.17858e+06	942808	1.19552e+06	1.06186e+06
M125T374	125.016	374.2	6.2	175512	448877	234906	239888	152229	156679	207223	156085	45058.2	164063	110936	252259	220466	249057	211896	370407	232082	152159	136838	250856	206430	207041	224346	390455	187093	182632	215798	213838	215549	216450	215441
M125T499	125.097	498.9	8.3	77903.2	101486	52505.1	109160	113928	115768	107783	102631	70270.6	147117	94504.4	130690	78006.4	89133.1	97920.9	87945.2	57819.2	75434.7	145444	74616.9	53871.3	125330	144329	190489	153522	160361	149993	149103	153455	120523	155388
M125T70	125.025	70.5	1.2	664903	655914	565957	625313	589818	394324	593617	795957	550559	1.16208e+06	648508	811569	984549	1.1874e+06	929516	2.21614e+06	2.17887e+06	597826	1.84036e+06	1.23696e+06	894958	541004	551057	1.36214e+06	825725	793886	792490	809262	1.00407e+06	793200	792977
M125T85	124.991	84.6	1.4	546095	772166	467014	790335	863906	154252	1.15123e+06	372456	1.13409e+06	1.02129e+06	528286	601541	1.14013e+06	981256	812976	634427	720514	574209	962214	777068	352987	1.00487e+06	701779	488888	1.11612e+06	995936	801664	1.03976e+06	1.03828e+06	894433	1.04155e+06
M125T86	125.011	86.1	1.4	5.65813e+07	5.76848e+07	5.13791e+07	4.36749e+07	3.54682e+07	5.00052e+07	4.93456e+07	5.8437e+07	5.46714e+07	5.06989e+07	5.09276e+07	4.5872e+07	5.24649e+07	4.34678e+07	4.65411e+07	8.44255e+07	2.9302e+07	7.18623e+07	5.69424e+07	5.88776e+07	4.55099e+07	6.97108e+07	5.49613e+07	5.18869e+07	4.33733e+07	4.24137e+07	4.24923e+07	4.25393e+07	4.53174e+07	4.21479e+07	4.51751e+07
M125T91	125.025	91	1.5	537611	590976	611964	612610	650646	544991	478419	389419	620619	581278	631806	502069	623496	607060	530172	629223	547010	646608	441612	658628	608609	643293	557785	583307	579814	563808	521880	583680	581424	578846	365635
M126T154	126.092	153.5	2.6	393317	401779	474286	503192	447381	462401	467822	481828	366338	550749	399352	449388	1.46378e+06	448310	438361	449521	418499	489516	405401	426721	513193	422460	481315	387492	495499	409824	444039	448948	568287	448180	582288
M126T159	126.002	159	2.6	800070	3.15248e+06	3.13915e+06	5.15823e+06	3.8977e+06	5.42113e+06	526369	2.9692e+06	4.65155e+06	6.13079e+06	6.26141e+06	3.38939e+06	4.68247e+06	3.47202e+06	8.44458e+06	3.902e+06	4.40795e+06	4.54732e+06	2.24972e+06	3.99017e+06	4.09281e+06	4.04166e+06	1.20229e+07	3.18264e+06	4.6858e+06	4.40233e+06	5.01845e+06	3.69397e+06	4.83634e+06	3.84273e+06	4.76163e+06
M126T166	126.001	166.5	2.8	3.07285e+06	2.42185e+06	2.9796e+06	3.48303e+06	3.57672e+06	4.03721e+06	3.641e+06	1.82817e+06	4.73194e+06	2.98894e+06	3.94328e+06	2.6021e+06	2.48939e+06	2.34901e+06	2.93679e+06	2.33069e+06	2.17455e+06	6.05804e+06	2.62014e+06	3.47663e+06	3.16715e+06	3.15234e+06	3.79394e+06	3.4158e+06	3.16274e+06	3.07101e+06	3.16155e+06	3.1613e+06	1.30666e+06	2.9814e+06	2.96024e+06
M126T53	125.9	53.1	0.9	567397	2.4339e+06	2.24142e+06	2.45935e+06	2.02142e+06	1.96981e+06	1.46053e+06	1.52574e+06	2.38631e+06	1.56388e+06	2.10975e+06	1.64705e+06	1.61054e+06	1.75767e+06	1.72992e+06	1.62802e+06	1.98591e+06	2.3964e+06	2.26323e+06	2.25623e+06	2.19021e+06	1.9781e+06	2.49606e+06	1.73712e+06	2.34598e+06	2.34411e+06	2.34551e+06	2.34584e+06	2.26257e+06	2.23325e+06	2.26105e+06
M126T86	126.003	86.1	1.4	9.6503e+07	9.66642e+07	8.09568e+07	1.3304e+08	9.09619e+07	3.16382e+07	7.91532e+07	9.32116e+07	7.51615e+07	8.47209e+07	7.02144e+07	7.97508e+07	7.15015e+07	1.08879e+08	8.22076e+07	7.49509e+07	1.28413e+08	4.35789e+07	1.16982e+08	1.16333e+08	1.10939e+08	7.88588e+07	5.88199e+07	1.13913e+08	8.82279e+07	8.8264e+07	9.04978e+07	9.26976e+07	9.06238e+07	8.36591e+07	8.80435e+07
M126T89	126.02	88.7	1.5	1.3601e+06	1.63653e+06	1.00024e+06	1.08181e+06	1.20247e+06	1.25365e+06	1.20642e+06	1.23916e+06	1.00431e+06	1.26769e+06	1.11535e+06	1.35057e+06	907032	423705	1.00106e+06	1.17147e+06	1.0601e+06	1.13322e+06	1.27964e+06	1.42766e+06	1.09721e+06	1.24819e+06	1.11631e+06	1.08196e+06	1.03622e+06	1.13937e+06	1.04705e+06	1.03642e+06	1.04077e+06	1.03658e+06	1.09267e+06
M127T103	127.04	102.7	1.7	1.43234e+06	1.46341e+06	1.86434e+06	1.14748e+06	4.40747e+06	2.14361e+06	4.44267e+06	4.01066e+06	5.23825e+06	6.66791e+06	6.30806e+06	4.82165e+06	5.4175e+06	5.40956e+06	5.89446e+06	5.93841e+06	6.54575e+06	5.13881e+06	6.86882e+06	5.93196e+06	5.25957e+06	5.04369e+06	4.75921e+06	5.09383e+06	4.46973e+06	4.47125e+06	4.40066e+06	4.25791e+06	4.47096e+06	4.4355e+06	4.01361e+06
M127T121	127.04	121.2	2	3.07563e+07	4.72385e+07	2.56706e+07	4.12196e+07	3.9287e+07	4.09624e+07	2.5643e+07	2.23766e+07	7.14057e+07	3.51477e+07	4.9806e+07	4.70596e+07	8.35884e+07	2.60317e+07	5.3512e+07	5.30117e+07	3.24481e+07	7.40805e+07	4.70569e+07	2.6321e+07	2.20589e+07	3.62713e+07	7.18422e+07	4.86294e+07	4.56901e+07	4.5715e+07	4.43652e+07	4.57196e+07	4.7043e+07	4.73943e+07	4.70893e+07
M127T147	127.004	147.4	2.5	8.94763e+06	2.46442e+07	6.21377e+06	2.47318e+07	6.62717e+06	9.49669e+06	2.00027e+07	1.93821e+07	1.92851e+07	2.55375e+07	2.99937e+07	9.04036e+06	9.25617e+06	1.85806e+07	7.11617e+06	2.17097e+07	2.33333e+07	6.99749e+06	8.39708e+06	3.25167e+07	2.03826e+07	3.36087e+07	1.73116e+07	3.97113e+07	1.96221e+07	1.81607e+07	1.28215e+07	1.96011e+07	1.82612e+07	1.96733e+07	1.71274e+07
M127T277	126.881	277.1	4.6	208649	152889	174302	250693	192263	140834	218964	164075	180658	303590	191330	206107	178236	315807	238282	319774	243514	183698	161374	189276	244183	187423	309331	261384	199707	201477	190289	202173	194970	184931	195170
M127T303	127.076	303.3	5.1	859511	822185	781932	732140	583765	431511	1.18876e+06	595482	359247	620926	375225	418037	187602	584544	328061	537192	833713	214093	1.77573e+06	568370	556127	268275	372486	350905	500193	517814	483667	353586	499819	412139	499568
M127T368	126.881	368.2	6.1	22049.9	40743.3	25438.4	48524.7	19312.2	10331.9	17863.6	37319.2	19438.9	29409	17660.5	11603.4	33422.1	9054.63	38632.1	16231.1	17953.8	11048.1	42958	34129.6	15736	33638.3	11138.3	12580.8	15129.3	13639.9	15019.9	13602.9	9123.86	19763.1	15259.4
M127T383	126.881	382.6	6.4	86815.1	58908	74534.6	36561.7	61401.1	32424.3	63257.2	30599.6	102460	130500	209669	156819	59636.2	66386.7	75193.6	55304.5	82478.7	45250.6	75293.8	22007	53479	144482	95201.5	151130	77569.8	77730.3	69419.4	54076.9	85182.6	68846.8	82355.8
M127T44	126.881	43.8	0.7	204334	202967	200689	259934	187806	193540	217164	262659	246237	283350	239354	247302	228589	355175	250557	298297	265762	285108	274231	260562	321591	255732	276397	299919	257869	257809	257955	254568	251430	257857	238245
M127T493	127.113	493.5	8.2	68528.8	130688	135091	143510	89994.2	42499.1	79447.7	241421	52986.5	24533.8	53694.8	50399.5	32232.4	137251	58113.9	59006.3	344852	19912.6	84794	142641	202570	42222.3	36761.3	111557	86604.1	56501.3	79423	94002.2	80273.3	86601.4	108798
M127T506	127.113	506.2	8.4	222959	157215	179373	268861	155560	247529	187571	232738	176341	169332	211622	142561	186507	204927	183497	206150	268111	248639	336138	291099	196616	217834	209703	333985	220164	232542	219954	203230	220014	188708	219723
M127T86	127.007	86.1	1.4	1.27787e+06	745043	1.2589e+06	1.13486e+06	2.24934e+06	1.37189e+06	1.72175e+06	1.18641e+06	3.30533e+06	1.82835e+06	2.52145e+06	1.35634e+06	1.39888e+06	1.2949e+06	1.42854e+06	1.86534e+06	2.05099e+06	1.04191e+06	990948	2.36685e+06	1.63529e+06	2.02221e+06	1.5086e+06	870264	1.46976e+06	1.76248e+06	1.77481e+06	1.55232e+06	1.75561e+06	1.38847e+06	2.23269e+06
M128T120	128.072	119.6	2	491064	764406	433631	639652	599684	668448	464884	435278	1.54781e+06	824577	1.29829e+06	1.41471e+06	808767	378723	948116	940897	394562	653621	793885	272403	455429	1.07287e+06	1.05871e+06	877254	688537	762471	761439	756736	728287	778412	806860
M128T121	128.043	121.1	2	2.6785e+06	4.10761e+06	4.85731e+06	849129	987671	2.33245e+06	1.40107e+06	2.47991e+06	737898	2.75029e+06	3.251e+06	1.26468e+06	3.1167e+06	7.96687e+06	1.3751e+06	4.10069e+06	1.57727e+06	2.63267e+06	1.64162e+06	2.40684e+06	3.21149e+06	4.48633e+06	2.57955e+06	3.06759e+06	2.36255e+06	3.37389e+06	2.18964e+06	1.45658e+06	3.57582e+06	2.90978e+06	3.52354e+06
M128T147	128.007	147.2	2.5	882388	766190	1.09915e+06	1.05296e+06	715358	199599	1.25144e+06	1.11715e+06	420877	1.22323e+06	966837	537195	1.25538e+06	755983	891801	1.0846e+06	655501	1.22008e+06	1.83915e+06	2.59992e+06	1.47354e+06	709365	416293	1.32218e+06	974790	950275	902739	954599	1.01733e+06	974270	973606
M128T164	128.007	164.1	2.7	656607	164165	570833	725804	491893	505210	502385	611310	338107	303930	500221	536994	315663	427352	143468	346605	498878	89950.4	335333	763892	432524	470664	275688	527607	434489	462720	460527	503907	440154	461612	440040
M128T173	128.018	173.5	2.9	76872.1	834960	123298	113118	132689	145723	95790.1	105233	208633	325319	1.01943e+06	561380	1.2877e+06	2.23571e+06	400509	2.24204e+06	108207	145709	422952	1.15205e+06	276060	580728	412335	1.38688e+06	586152	302943	397799	584576	644959	364172	388479
M128T204	127.998	204.1	3.4	134897	186959	172759	189756	240582	24936	275184	241798	65505.7	125793	109820	115974	75022.2	194676	140127	133668	240732	8559.02	221017	189289	178120	20808.6	59551.2	80636	100044	98804.9	98852.3	40128.3	98783.4	92643.9	92289.1
M128T32	127.957	31.5	0.5	130794	147111	132150	139462	153042	188782	143525	146154	165676	136818	135960	150636	149025	139307	146572	138742	115629	122003	140459	141259	135490	149218	162659	107430	137927	138715	137924	137922	140092	143405	136639
M128T471	128.018	470.7	7.8	563391	417883	552202	462418	509092	74599.3	737085	888438	33841	622616	722394	372628	64585.5	845259	284032	332832	1.34374e+06	90459.2	373920	661067	694471	36839.7	44086.2	67407.7	477489	374833	485718	522314	472280	485450	485315
M128T55	127.897	55	0.9	385404	561423	281483	430132	426598	466713	499175	377295	656103	587809	507710	414427	454791	404134	627536	810087	397542	386811	638113	664972	439904	630288	552402	474645	350388	338249	352414	353621	253729	332732	402049
M128T80	128.035	80.4	1.3	3.50592e+07	2.51961e+07	5.27112e+07	3.83672e+07	4.30139e+07	4.55633e+07	8.31169e+07	6.61128e+07	3.47461e+07	1.11857e+08	1.13214e+08	4.92255e+07	3.80933e+07	1.0966e+08	6.53758e+07	8.76381e+07	5.21039e+07	1.57524e+07	6.55429e+07	1.14068e+08	1.05924e+08	4.76975e+07	5.03357e+07	3.8216e+07	6.77372e+07	5.71451e+07	6.78011e+07	7.428e+07	6.5646e+07	6.77945e+07	6.60289e+07
M128T87	128.055	87.2	1.5	1.13053e+06	679844	1.20384e+06	1.00192e+06	990543	991840	1.19693e+06	792975	1.60319e+06	2.3114e+06	1.63235e+06	1.54897e+06	1.33361e+06	1.22882e+06	1.38566e+06	1.40582e+06	759702	1.40586e+06	1.49289e+06	1.29628e+06	1.38091e+06	1.43759e+06	1.03853e+06	1.45063e+06	1.35461e+06	1.35422e+06	1.35929e+06	1.39074e+06	1.70901e+06	1.36549e+06	1.39251e+06
M128T90	128.035	90.2	1.5	6.0518e+08	6.40997e+08	5.36022e+08	6.44173e+08	6.01552e+08	4.94634e+08	6.93413e+08	5.45444e+08	2.4054e+08	2.04721e+08	2.19852e+08	3.31498e+08	1.93241e+08	3.18344e+08	2.24223e+08	2.55185e+08	6.03536e+08	2.87818e+08	7.44676e+08	6.85585e+08	5.32798e+08	2.81414e+08	2.02466e+08	2.87851e+08	2.15346e+08	3.36207e+08	3.43342e+08	4.81375e+08	3.63152e+08	3.38004e+08	3.62251e+08
M129T100	128.96	99.8	1.7	7.71362e+06	927252	1.16187e+07	5.85159e+06	2.99258e+06	316225	7.22463e+06	1.01434e+07	194516	176172	3.09332e+06	375791	340458	4.01838e+06	401885	331738	3.61326e+06	324476	504911	9.96207e+06	2.44645e+06	417273	230238	224096	3.14619e+06	3.13825e+06	3.50881e+06	3.2356e+06	3.82752e+06	3.12578e+06	2.98167e+06
M129T101	128.983	101.5	1.7	520891	515521	478511	530664	653021	838554	584641	481372	335667	275263	339331	278022	185686	352198	349634	347751	426938	217565	573494	537172	509116	399537	270673	391848	400077	379038	361525	361269	245489	380482	334295
M129T108	129.019	107.6	1.8	8.25033e+06	9.95348e+06	8.09211e+06	7.53406e+06	9.61582e+06	8.45589e+06	8.08613e+06	6.67131e+06	6.2853e+06	7.69999e+06	6.35345e+06	9.33297e+06	1.00123e+07	7.33212e+06	6.80281e+06	6.96476e+06	7.45397e+06	9.64022e+06	7.45194e+06	7.39715e+06	7.13434e+06	7.96827e+06	7.56812e+06	5.11721e+06	8.6591e+06	8.54894e+06	8.66383e+06	8.6504e+06	8.68527e+06	8.22996e+06	5.88478e+06
M129T111	128.96	111.4	1.9	2.97964e+06	1.30712e+06	2.73229e+06	2.1378e+06	1.39578e+06	793132	3.19434e+06	915574	1.42817e+06	5.31765e+06	1.3748e+06	989134	1.07341e+06	3.4276e+06	1.39132e+06	4.85148e+06	2.85188e+06	3.67244e+06	5.69563e+06	3.62634e+06	4.7921e+06	4.09059e+06	1.90346e+06	4.19789e+06	1.70903e+06	2.37852e+06	1.73823e+06	1.69544e+06	2.17763e+06	1.92949e+06	1.02771e+06
M129T148	129.018	147.8	2.5	1.26526e+06	645514	692737	1.34507e+06	807554	1.36848e+06	136551	934042	161249	1.3046e+06	922559	1.56568e+06	730172	739259	976534	455418	2.15487e+06	315820	2.14106e+06	2.20155e+06	1.21559e+06	1.2131e+06	1.31928e+06	1.07949e+06	914264	985127	984199	1.19711e+06	1.00039e+06	883217	806209
M129T603	129.129	603.4	10.1	81522.4	338518	16728.2	136639	5547.56	96577.2	72128.2	18088.2	38808.1	141550	22576.7	20632.2	38765.7	44645.9	131466	182402	18921	5581.37	251752	355535	73434.6	40657.7	7493.19	226095	103426	106118	102506	102008	91970.4	44552.1	82230.7
M129T70	129.019	70	1.2	3.74269e+06	4.68664e+06	3.52815e+06	3.79486e+06	2.41137e+06	2.4983e+06	2.91119e+06	1.96399e+06	2.98729e+06	6.35049e+06	4.45489e+06	8.37147e+06	6.21073e+06	2.76521e+06	7.36657e+06	4.33108e+06	4.60822e+06	4.52508e+06	4.07e+06	2.96713e+06	2.44138e+06	7.49435e+06	4.43478e+06	7.91715e+06	5.01515e+06	4.7003e+06	4.7508e+06	4.63554e+06	4.99345e+06	2.97507e+06	5.0004e+06
M129T80	129.039	80.4	1.3	4.18399e+06	4.05058e+06	4.42455e+06	5.05521e+06	9.82916e+06	4.10801e+06	6.16657e+06	8.40989e+06	502363	542946	516365	524155	446480	528028	543591	500117	4.11482e+06	557015	9.20505e+06	3.99692e+06	3.86952e+06	561300	539668	540217	3.30695e+06	3.40018e+06	3.43137e+06	3.40029e+06	3.40089e+06	4.13759e+06	4.31129e+06
M129T82	128.892	82.2	1.4	599345	2.03183e+06	568438	2.02112e+06	539445	799511	312226	1.26343e+06	598712	297525	694329	294730	217720	843425	282343	634135	849359	653363	2.14528e+06	1.3909e+06	1.2875e+06	238309	788621	316693	820090	745816	473011	819833	577838	822305	698360
M129T84	128.96	84.4	1.4	4.26296e+07	4.36e+07	4.90124e+07	4.26348e+07	4.5276e+07	5.23236e+07	4.58631e+07	4.36699e+07	3.44769e+07	3.87386e+07	3.82238e+07	4.65763e+07	4.10663e+07	4.69074e+07	5.16579e+07	3.69725e+07	3.71662e+07	4.62451e+07	3.46788e+07	3.45813e+07	4.12679e+07	3.68686e+07	3.00931e+07	4.6387e+07	4.04042e+07	4.25668e+07	4.04598e+07	4.24886e+07	4.87364e+07	4.24719e+07	4.05396e+07
M129T88	129.019	88.3	1.5	8.88109e+06	2.93327e+07	2.40652e+07	2.2125e+07	3.5417e+07	7.69942e+06	2.51803e+07	2.76675e+07	7.72911e+06	2.71437e+07	3.6353e+07	3.05942e+07	2.53185e+07	2.67214e+07	2.99486e+07	3.57713e+07	2.75644e+07	7.96679e+06	2.7339e+07	8.71074e+06	8.99054e+06	2.91375e+07	2.85914e+07	7.47484e+06	3.00158e+07	2.84658e+07	2.94795e+07	1.22657e+07	3.01167e+07	2.82926e+07	2.83086e+07
M129T96	129.019	96.4	1.6	4.06699e+06	2.00143e+06	1.85512e+07	2.45084e+06	3.15663e+06	4.20159e+06	4.23593e+07	1.46488e+07	2.06376e+07	4.44517e+07	1.23191e+07	2.35919e+07	8.54158e+06	2.98458e+07	2.85349e+07	4.96366e+07	1.83041e+07	6.08263e+06	3.61783e+06	1.76936e+07	1.02907e+07	2.03931e+07	3.58129e+06	1.41559e+07	7.20877e+06	7.77507e+06	1.05409e+07	4.96483e+06	1.07116e+07	1.09454e+07	1.07123e+07
M130T102	130.051	101.9	1.7	1.0143e+07	2.47291e+07	1.82457e+07	1.99818e+07	9.38963e+06	7.57983e+06	9.24984e+06	1.55091e+07	1.49444e+07	2.16959e+07	1.31945e+07	1.66032e+07	1.19715e+07	1.97162e+07	1.81148e+07	2.05491e+07	2.46848e+07	1.41094e+07	2.32511e+07	1.48597e+07	2.5358e+07	1.06572e+07	1.16999e+07	2.36107e+07	1.60623e+07	1.37448e+07	1.71992e+07	1.60678e+07	1.63157e+07	1.64338e+07	1.60624e+07
M130T106	130.033	106.1	1.8	79495.4	61850.1	64989.8	42257.8	78027.3	51355.4	68847.8	38228.1	65045.8	32858.3	94162.9	51093.4	25096.7	35195.7	35743.9	34936.8	95756.2	14776.2	41335.6	3391.82	53967.4	62674.9	32162.9	64806.8	50255.6	46858.1	49191.8	49600.2	51888.7	49928.4	51089.7
M130T125	130.087	124.7	2.1	2.63209e+08	2.67561e+08	2.22641e+08	3.1328e+08	3.94095e+08	3.35476e+08	2.36723e+08	2.82624e+08	2.00337e+08	1.97407e+08	1.82967e+08	1.50178e+08	1.56468e+08	2.2004e+08	1.46807e+08	1.5662e+08	4.23315e+08	1.53774e+08	5.03851e+08	4.05527e+08	3.6693e+08	1.84956e+08	1.90288e+08	2.77702e+08	1.69927e+08	1.69892e+08	1.69648e+08	1.78388e+08	1.38935e+08	1.77939e+08	1.85418e+08
M130T153	130.087	153.2	2.6	4.18253e+07	2.71852e+07	2.8892e+07	3.0984e+07	2.49561e+07	4.66445e+07	1.97336e+07	1.74189e+07	1.20128e+08	1.02678e+08	1.14143e+08	7.77716e+07	9.5258e+07	6.92403e+07	1.20648e+08	8.80966e+07	1.979e+07	1.5994e+08	5.65831e+07	5.14245e+07	4.33292e+07	1.47547e+08	1.26396e+08	1.11391e+08	7.92704e+07	8.44912e+07	7.93499e+07	7.6383e+07	7.63526e+07	6.97279e+07	6.81659e+07
M130T32	130.015	31.8	0.5	172874	145283	1.86643e+06	729389	61518.9	135733	134418	139564	179154	127738	458668	133069	705543	487950	123314	488995	136686	610707	888758	630902	636873	126937	398451	127131	321491	369928	190620	194518	359850	366516	356026
M130T417	130.033	417.2	7	35611.7	26063.6	12855.5	28268.2	30909.8	24206.7	29183.5	37423.6	19092	32806.2	32503	19050.1	37531.6	35077.5	22242.1	31937	38256	41083.7	41376.9	37748.8	30296.5	22200.8	17107	22978.3	29490.3	25598.5	22794.6	29149	30253.8	30333.6	31971.9
M130T457	130.041	457.1	7.6	55961.1	118926	59894.6	74642.3	33050.2	35672.6	44141.6	150869	278477	769055	360642	601962	285604	188409	215784	1.52007e+06	301478	356152	598577	144694	158545	200917	153042	370331	218511	253317	217307	220177	319774	221260	239895
M130T88_1	130.023	88.4	1.5	955756	1.2953e+06	1.02755e+06	1.15246e+06	720182	436397	1.12981e+06	1.25941e+06	637972	1.53987e+06	1.14552e+06	833495	410486	1.9457e+06	1.10371e+06	1.54072e+06	1.69468e+06	613704	1.73132e+06	1.47597e+06	1.73908e+06	1.13306e+06	732200	1.73235e+06	1.16004e+06	1.04866e+06	1.02562e+06	1.12553e+06	1.02376e+06	1.02437e+06	918551
M130T95	130.062	94.7	1.6	7.35312e+08	6.84424e+08	2.80783e+08	6.93713e+08	8.40168e+08	5.14968e+08	5.85893e+08	5.53503e+08	8.70642e+08	6.76839e+08	7.86018e+08	6.01109e+08	6.76236e+08	6.34243e+08	7.4099e+08	6.39755e+08	1.08903e+09	7.01387e+08	6.4281e+08	8.93353e+08	9.88955e+08	8.49433e+08	8.18784e+08	7.14778e+08	6.13819e+08	4.86053e+08	7.41276e+08	7.01635e+08	6.18778e+08	5.7109e+08	6.59074e+08
M131T102	131.054	102	1.7	1.54991e+06	1.16483e+06	827381	889407	1.19297e+06	1.11439e+06	1.1948e+06	713777	1.08439e+06	597262	646208	685819	790360	630530	751528	816304	440226	503643	538262	1.50764e+06	988679	1.01602e+06	515172	458857	874160	933082	588844	872741	824330	873725	550689
M131T122	131.071	121.9	2	636584	250557	706093	114986	994741	985049	1.76834e+06	1.1856e+06	1.50159e+06	1.3715e+06	1.19064e+06	1.06784e+06	1.28367e+06	973571	1.41009e+06	1.07982e+06	1.55662e+06	1.3486e+06	1.73672e+06	1.6862e+06	1.449e+06	1.31591e+06	1.21367e+06	1.10794e+06	1.22944e+06	1.3114e+06	1.16283e+06	1.22887e+06	1.14742e+06	1.15642e+06	1.1447e+06
M131T125	131.091	124.7	2.1	1.78918e+06	2.46064e+06	1.72738e+07	3.02838e+06	4.53028e+06	8.92448e+06	1.26116e+07	6.96279e+06	1.45413e+07	1.84884e+07	2.02164e+07	1.36821e+07	1.67685e+07	1.12064e+07	2.11628e+07	3.61025e+07	8.96112e+06	1.24356e+07	1.8515e+07	1.65988e+07	6.08057e+06	1.91738e+07	1.34827e+07	1.36585e+07	7.49317e+06	1.20879e+07	1.06822e+07	1.06543e+07	1.0536e+07	1.11861e+07	1.27924e+07
M131T133	130.94	132.7	2.2	73209.2	113832	97223.5	123069	62013.7	54935.9	52683.5	61298.4	259391	233730	249192	189934	148923	194421	261776	297644	92147.8	175720	67608.3	147061	55154.8	574292	368369	397623	309134	208710	204983	190629	190717	189508	187172
M131T154	131.091	153.7	2.6	8.05217e+06	8.96602e+06	4.40807e+06	4.15308e+06	3.58957e+06	4.07826e+06	5.11899e+06	7.52654e+06	5.43476e+06	3.61116e+06	3.92611e+06	3.8311e+06	3.01238e+06	6.13558e+06	8.10757e+06	6.33591e+06	6.68249e+06	7.01456e+06	4.81245e+06	6.65846e+06	5.94496e+06	8.17863e+06	8.88202e+06	6.44231e+06	4.65519e+06	4.96844e+06	4.66588e+06	4.97536e+06	3.96977e+06	5.70329e+06	5.63935e+06
M131T216	131.072	216.1	3.6	904912	1.47522e+06	976783	923250	1.73468e+06	1.55914e+06	170383	1.58428e+06	1.07855e+06	717272	1.43159e+06	890932	1.05099e+06	982979	940238	1.43736e+06	2.81451e+06	1.67306e+06	1.56245e+06	2.75914e+06	1.15131e+06	765044	1.39559e+06	702961	1.05984e+06	1.09256e+06	702052	1.25027e+06	692961	1.48861e+06	869099
M131T236	131.071	236.3	3.9	2.46072e+06	1.28787e+07	1.40439e+06	1.63096e+06	1.08652e+06	873151	1.66805e+06	1.38092e+06	747345	1.54461e+06	688093	865799	2.65819e+06	902497	514157	649895	511380	928123	1.52198e+06	1.97127e+06	440176	507934	523545	684865	1.62651e+06	1.58819e+06	1.61955e+06	1.61959e+06	1.62739e+06	1.649e+06	1.6627e+06
M131T355	131.071	354.6	5.9	2.86797e+06	304113	3.29477e+06	2.22691e+06	2.46684e+06	2.07993e+06	4.04745e+06	3.45386e+06	3.7373e+06	3.62426e+06	2.27333e+06	2.45635e+06	420463	4.49782e+06	3.44759e+06	2.73801e+06	2.27355e+06	243001	2.72939e+06	578385	2.95538e+06	2.63389e+06	1.76442e+06	2.88937e+06	1.94211e+06	1.88767e+06	2.0351e+06	1.89124e+06	2.03078e+06	884547	2.04058e+06
M131T363	130.993	362.9	6	1.19212e+07	1.00048e+07	9.59329e+06	1.02288e+07	9.2931e+06	1.12367e+07	1.27432e+07	8.92928e+06	1.16607e+07	9.14479e+06	1.07589e+07	8.58773e+06	8.61004e+06	9.4239e+06	8.98989e+06	9.00444e+06	7.94377e+06	8.62662e+06	1.40392e+07	1.43665e+07	9.77031e+06	1.17203e+07	1.1224e+07	8.94934e+06	9.71e+06	1.04763e+07	9.68074e+06	1.03355e+07	5.20182e+06	9.38328e+06	1.04519e+07
M131T57	130.94	57.1	1	954206	1.52421e+06	937476	1.89524e+06	1.08235e+06	1.56177e+06	1.0428e+06	1.2198e+06	1.64455e+06	1.01819e+06	1.54875e+06	1.01257e+06	937209	2.58351e+06	1.1451e+06	2.53784e+06	1.24033e+06	2.12883e+06	2.90131e+06	1.56983e+06	1.10778e+06	957237	1.5258e+06	1.01525e+06	1.42678e+06	1.06711e+06	942707	1.06748e+06	1.09219e+06	1.06574e+06	998260
M131T768	130.993	768.1	12.8	8.39357e+06	3.80436e+06	7.1571e+06	3.6337e+06	8.03359e+06	7.30506e+06	4.2412e+06	7.98764e+06	1.17242e+06	3.22306e+06	2.32021e+06	2.6033e+06	3.20994e+06	2.58702e+06	1.77845e+06	4.02563e+06	5.86179e+06	1.03579e+06	2.25359e+06	3.02274e+06	4.8532e+06	4.43734e+06	1.6314e+06	1.51918e+06	4.50315e+06	4.49502e+06	4.50354e+06	4.51107e+06	4.25723e+06	3.84458e+06	4.49052e+06
M131T815	130.993	814.8	13.6	8.22478e+06	5.59414e+06	5.46857e+06	4.33869e+06	4.62787e+06	9.7641e+06	9.69886e+06	9.9186e+06	5.98939e+06	7.45634e+06	7.12859e+06	1.26685e+07	1.82829e+07	7.01293e+06	8.12548e+06	1.90818e+07	8.07378e+06	1.40088e+07	7.64311e+06	8.38285e+06	1.49268e+07	1.29641e+07	5.6682e+06	1.49843e+07	1.05636e+07	1.07764e+07	1.14547e+07	6.29593e+06	1.14002e+07	1.13942e+07	1.13992e+07
M131T89	131.083	89	1.5	6.50987e+07	1.54266e+07	4.71254e+07	2.6974e+07	1.18381e+07	3.0475e+07	3.16935e+07	2.03511e+07	2.4671e+07	3.18924e+07	3.36462e+07	1.66362e+07	2.46223e+07	3.13208e+07	3.21969e+07	2.59726e+07	6.04422e+07	2.74235e+07	8.33379e+07	3.8408e+07	2.24976e+07	3.58985e+07	2.96393e+07	5.55013e+07	2.91813e+07	2.49272e+07	1.33279e+07	3.84241e+07	2.27103e+07	2.44401e+07	2.92542e+07
M131T90	130.984	90.3	1.5	7.08049e+06	3.18147e+06	6.16156e+06	6.37749e+06	6.1574e+06	4.9761e+06	5.98724e+06	6.85631e+06	9.81973e+06	1.39218e+07	1.19268e+07	1.49209e+07	3.96785e+06	1.36491e+07	1.24723e+07	1.4544e+07	7.47245e+06	4.01621e+06	4.13198e+06	8.23469e+06	7.7105e+06	5.27298e+06	8.71975e+06	1.11867e+07	7.82456e+06	7.83189e+06	7.82309e+06	7.82283e+06	4.93472e+06	3.91955e+06	7.84519e+06
M131T91	131.035	90.9	1.5	1.64013e+06	606147	7.71133e+06	661680	1.5107e+06	1.5548e+06	1.19319e+07	7.05024e+06	1.22204e+07	1.7879e+07	1.48963e+07	2.42335e+06	1.9879e+06	1.10362e+07	2.46824e+06	8.97278e+06	2.25743e+06	6.0978e+06	8.82265e+06	1.39418e+07	1.10066e+07	1.51435e+07	9.69204e+06	1.30122e+06	6.46088e+06	5.9607e+06	4.18669e+06	6.86528e+06	6.51968e+06	6.46161e+06	2.88606e+06
M131T95	131.066	94.7	1.6	4.33121e+07	1.25841e+07	4.39426e+07	1.19866e+07	1.28982e+07	1.3024e+07	3.22102e+07	1.26468e+07	5.11896e+07	1.19574e+07	5.43301e+07	2.03093e+07	2.26318e+07	1.21641e+07	1.13456e+07	3.48494e+07	1.51585e+07	4.45584e+07	1.10497e+08	1.0149e+08	1.20977e+07	3.12074e+07	1.26877e+07	1.23585e+07	2.93277e+07	3.36406e+07	3.06919e+07	2.44402e+07	2.40839e+07	1.85613e+07	2.72582e+07
M132T114	132.012	113.9	1.9	411688	3.10313e+06	2.64163e+06	2.24272e+06	2.19239e+06	2.74111e+06	2.37567e+06	1.95707e+06	2.31641e+06	720648	406096	1.50593e+06	2.00024e+06	1.53858e+06	1.54002e+06	412330	3.10814e+06	2.77464e+06	2.60572e+06	2.49482e+06	3.3151e+06	3.30909e+06	4.37256e+06	2.81434e+06	2.21435e+06	2.37744e+06	2.35011e+06	2.35312e+06	2.4438e+06	2.50783e+06	2.43893e+06
M132T125	132.092	125.2	2.1	335483	220717	229409	912498	247585	332828	271326	217292	487841	323663	458744	297318	343877	280985	393227	342447	416018	615279	521392	261442	311954	297170	723587	489972	457787	437209	436514	440093	447030	467170	428659
M132T126	132.03	125.6	2.1	127375	145676	135496	124007	193038	149804	142024	260729	216201	152315	212690	93820.1	171956	133384	141445	154936	151030	174711	182478	332964	251930	354714	318724	165076	173029	171251	171846	214658	180853	172846	202206
M132T216	132.075	216.3	3.6	222325	177466	214700	206884	298513	228033	139043	201844	226893	170456	203283	260727	985934	64017.5	377009	253861	235846	658572	430184	305536	248034	258556	243508	254110	260909	221524	238071	241494	148811	212765	228949
M132T354	132.075	354	5.9	53201.2	57231	9687.67	9657.8	1872.4	11943	37730.2	12626.2	1448.51	127167	901.925	8261.55	62230.4	18278.5	41088.6	22866.1	18498.5	528.868	176007	218035	8184.02	7800.17	5569.42	26684.2	55924.7	41484.9	42949	50946.5	42973.8	37170.9	47891.2
M132T374	132.03	373.9	6.2	459604	292077	411741	271865	339977	287843	365612	289952	626263	1.05089e+06	580134	432743	677571	459582	466709	317081	513703	177282	119688	737191	142741	293083	242324	883829	329249	166825	322090	207838	316269	370933	319613
M132T89	132.086	89.1	1.5	1.50947e+06	1.15452e+06	1.49134e+06	1.14595e+06	1.87161e+06	664290	1.84401e+06	1.79969e+06	725859	796572	973941	601671	747391	1.09714e+06	856568	845275	1.68994e+06	869530	1.60303e+06	2.06316e+06	1.69176e+06	787580	735812	932746	1.20857e+06	1.19011e+06	1.22449e+06	1.20811e+06	1.14622e+06	1.20856e+06	1.0632e+06
M132T91	131.984	90.6	1.5	770617	1.01492e+06	941843	1.0446e+06	993611	345504	1.20677e+06	1.15957e+06	749892	661730	495991	534819	432925	619799	673735	725377	1.17882e+06	321453	1.17051e+06	1.07074e+06	948496	375219	379816	468009	699313	722467	699382	699151	685670	614486	685755
M132T94	132.067	94.4	1.6	3.66188e+06	6.33145e+06	9.23755e+06	5.47137e+06	2.65698e+06	2.13471e+06	4.73542e+06	2.10971e+06	3.5197e+06	1.08071e+06	3.85334e+06	5.88795e+06	1.85561e+06	3.64736e+06	3.37363e+06	8.01207e+06	1.39268e+06	931899	6.28386e+06	4.74979e+06	3.5424e+06	4.94955e+06	7.04105e+06	1.84039e+06	2.28436e+06	3.14521e+06	5.06545e+06	4.27235e+06	4.26078e+06	4.28871e+06	4.29515e+06
M132T95	132.03	95.1	1.6	3.21188e+06	6.17689e+06	3.98745e+06	4.43461e+06	6.39259e+06	5.68623e+06	3.21131e+06	1.84596e+06	8.383e+06	2.45802e+06	5.18438e+06	4.08033e+06	2.83527e+06	1.24892e+06	4.21922e+06	2.17022e+06	3.5731e+06	1.60912e+06	3.62686e+06	3.90946e+06	1.24878e+06	5.36374e+06	6.90459e+06	2.39027e+06	4.2304e+06	4.34395e+06	4.38721e+06	3.84674e+06	4.22258e+06	4.21937e+06	4.22463e+06
M133T109	133.014	108.8	1.8	4.17735e+07	3.8908e+07	5.51192e+07	2.89321e+07	6.81703e+07	3.50201e+07	5.90211e+07	3.68776e+07	3.82859e+07	3.70755e+07	5.0328e+07	3.90059e+07	2.4001e+07	3.30818e+07	4.3848e+07	5.43371e+07	3.99494e+07	2.25479e+07	3.40504e+07	5.43215e+07	4.04559e+07	4.67989e+07	3.011e+07	2.76987e+07	3.61563e+07	3.33889e+07	3.59925e+07	3.68888e+07	3.59885e+07	3.62879e+07	3.62847e+07
M133T137	132.868	137	2.3	1.63372e+07	1.23249e+07	1.25175e+07	1.12061e+07	1.2058e+07	1.31293e+07	1.09159e+07	1.08513e+07	4.4351e+06	6.96822e+06	3.82933e+06	3.64336e+06	5.2919e+06	3.95464e+06	5.84895e+06	3.84959e+06	3.87408e+06	2.44761e+06	6.30064e+06	5.43284e+06	6.15669e+06	8.55862e+06	7.72452e+06	4.08172e+06	7.99345e+06	8.56929e+06	7.99903e+06	8.14547e+06	8.15119e+06	6.55238e+06	7.96709e+06
M133T153	133.013	153.5	2.6	1.00563e+07	1.14869e+07	9.72496e+06	8.34097e+06	9.81371e+06	6.47441e+06	1.07602e+07	9.52294e+06	1.02539e+07	1.4067e+07	1.65162e+07	1.58975e+07	9.812e+06	1.37758e+07	1.18908e+07	1.70659e+07	1.0633e+07	1.0218e+07	1.15464e+07	9.95218e+06	1.43656e+07	1.19735e+07	9.6653e+06	1.56685e+07	6.97015e+06	8.21865e+06	8.6466e+06	8.6385e+06	9.57762e+06	8.64304e+06	8.23084e+06
M133T250	133.014	250.5	4.2	2.5436e+06	2.45094e+06	1.64823e+06	1.39689e+06	3.74564e+06	2.11381e+06	4.50603e+06	3.03712e+06	3.36445e+06	4.75513e+06	3.97097e+06	3.96874e+06	3.51087e+06	3.89958e+06	5.49972e+06	7.11157e+06	4.59366e+06	6.25513e+06	4.92618e+06	7.37428e+06	5.6297e+06	4.40006e+06	5.829e+06	7.2905e+06	4.01942e+06	4.3687e+06	4.21425e+06	4.20886e+06	4.03319e+06	3.64957e+06	4.02898e+06
M133T285	133.014	285.5	4.8	5.09926e+06	3.79746e+06	5.00012e+06	5.91239e+06	5.35017e+06	4.43921e+06	4.11526e+06	5.03624e+06	5.19195e+06	5.72697e+06	4.82818e+06	4.40846e+06	4.66953e+06	5.21252e+06	3.18172e+06	4.42512e+06	5.17623e+06	5.29774e+06	6.17789e+06	4.29152e+06	4.0522e+06	4.08201e+06	6.32292e+06	5.0248e+06	5.28774e+06	5.30688e+06	5.02399e+06	4.8045e+06	5.10279e+06	4.71179e+06	4.71596e+06
M133T303	133.014	303.5	5.1	2.98858e+06	3.67139e+06	3.21199e+06	3.51955e+06	3.30666e+06	789639	2.58308e+06	3.27554e+06	1.70116e+06	2.12583e+06	3.06897e+06	2.23195e+06	1.25957e+06	3.32471e+06	2.40904e+06	2.69186e+06	4.31466e+06	906446	4.256e+06	3.66031e+06	3.58631e+06	2.23552e+06	2.02339e+06	2.85138e+06	3.18255e+06	2.71125e+06	2.60235e+06	2.67829e+06	2.73646e+06	2.74427e+06	2.67791e+06
M133T31_2	132.923	31	0.5	409419	653607	445523	777695	527082	494704	516604	745092	686986	730918	955918	457691	516468	849007	696054	1.00833e+06	153809	886973	631264	730574	572495	644551	871310	1.02497e+06	738138	701518	703330	819281	739769	707259	644098
M133T363	133.014	362.9	6	2.41765e+06	2.96642e+06	2.31516e+06	3.12651e+06	3.40117e+06	1.02589e+06	1.4476e+06	1.0223e+06	786827	518574	832887	303939	986792	450267	537088	412924	2.11074e+06	2.0258e+06	3.11884e+06	3.64419e+06	2.40307e+06	661900	1.32452e+06	892140	1.48295e+06	1.4325e+06	1.47997e+06	1.56698e+06	991177	896252	1.43228e+06
M133T37	132.868	37	0.6	1.50074e+07	7.85152e+06	1.82204e+07	3.25752e+06	8.06011e+06	2.92051e+06	1.79799e+07	1.60181e+07	1.07785e+07	1.57125e+07	1.66344e+07	1.11204e+07	2.62548e+06	9.95707e+06	1.29702e+07	1.13066e+07	9.95913e+06	3.23129e+06	1.49787e+07	1.0174e+07	1.31942e+07	1.1113e+07	1.5559e+07	2.0281e+07	1.02355e+07	1.22569e+07	1.16692e+07	1.03515e+07	1.11304e+07	4.41627e+06	1.07262e+07
M133T374	133.014	374.2	6.2	5.69786e+06	3.90723e+06	5.72875e+06	948346	4.77724e+06	4.44665e+06	6.48568e+06	4.47946e+06	3.33143e+06	1.46943e+06	7.35083e+06	2.70916e+06	895462	1.53666e+06	186162	859913	2.25942e+06	761065	174890	2.1504e+06	2.76397e+06	3.58233e+06	153406	3.56874e+06	1.4557e+06	2.50549e+06	2.78516e+06	2.77137e+06	2.95959e+06	2.56596e+06	2.75817e+06
M133T56	132.868	56	0.9	1.61874e+07	2.2409e+07	2.29596e+07	2.15594e+07	2.91346e+07	2.09775e+07	1.16486e+06	1.45764e+07	2.69409e+06	1.3697e+06	2.10022e+06	2.81718e+06	4.81229e+06	1.13076e+07	2.79386e+06	2.59616e+06	1.89024e+07	4.58138e+06	2.68294e+07	2.86001e+06	1.35779e+07	1.57587e+07	2.26961e+07	2.47442e+06	1.04355e+07	7.93669e+06	5.99256e+06	1.37886e+07	8.19146e+06	1.02962e+07	1.09412e+07
M133T57	132.935	56.9	0.9	296910	109726	368494	212716	354268	175733	332622	266930	294004	447755	498563	399673	420323	414639	338284	348184	152995	113285	130911	418231	360583	386709	179972	158626	432366	298811	349763	257122	349124	231325	351700
M133T74_1	132.976	74.2	1.2	120370	620362	711810	496787	67677	455467	830297	543040	679716	492736	479548	79588.4	69488.8	525827	59228.5	470507	66560.6	79895.9	503797	75134.9	84316	502977	103579	79186	572662	830355	677472	668594	1.07514e+06	822128	825873
M133T74_2	133.014	74.4	1.2	3.88525e+08	1.73611e+09	1.49056e+09	1.82491e+09	1.44314e+09	1.40888e+09	1.68786e+09	4.05268e+08	3.78003e+08	1.37336e+09	1.8178e+09	3.3057e+08	1.23173e+09	2.12285e+09	2.0316e+09	1.16544e+09	1.18932e+09	3.35175e+08	1.29446e+09	1.3328e+09	2.16935e+09	1.42744e+09	1.56211e+09	1.26049e+09	1.49423e+09	1.64083e+09	1.45748e+09	1.49322e+09	1.4405e+09	1.3957e+09	1.42886e+09
M133T74_3	133.055	74.2	1.2	809492	1.19198e+06	920469	970017	795418	577719	1.61029e+06	1.04054e+06	749217	656180	726338	791572	388289	612955	818932	686569	674811	628444	2.08701e+06	863256	621467	854770	652562	447961	838159	873616	875941	875997	862947	546424	828654
M133T80	133.034	80.3	1.3	2.3298e+07	2.66467e+07	3.31671e+07	2.21338e+07	2.14422e+07	2.63443e+07	2.84331e+07	2.53795e+07	3.2585e+07	2.89614e+07	2.98091e+07	1.91362e+07	4.57996e+07	2.99566e+07	3.85321e+07	3.88886e+07	3.11339e+07	8.04913e+07	4.04734e+07	3.5977e+07	4.41826e+07	1.66739e+07	2.9448e+07	1.70464e+07	2.84465e+07	2.84261e+07	2.83967e+07	3.00655e+07	2.92824e+07	2.78095e+07	3.26064e+07
M133T81	132.946	81.3	1.4	2.17392e+07	2.68158e+07	1.69002e+07	2.19723e+07	2.65772e+07	1.50698e+07	2.51783e+07	2.15206e+07	2.2016e+07	2.05616e+07	2.2419e+07	2.04532e+07	2.4053e+07	1.69592e+07	1.91037e+07	2.4914e+07	2.54205e+07	2.2742e+07	2.38902e+07	2.66277e+07	2.84894e+07	2.10666e+07	2.21203e+07	2.28312e+07	2.45949e+07	2.28039e+07	2.28057e+07	2.32979e+07	2.21536e+07	2.56939e+07	2.27849e+07
M133T89	133.051	88.7	1.5	3.26407e+06	2.66754e+06	2.75936e+06	721853	2.33369e+06	2.61066e+06	1.96462e+06	2.17812e+06	2.34513e+06	2.11605e+06	2.01026e+06	1.79699e+06	2.18816e+06	455192	2.28676e+06	1.5639e+06	2.10738e+06	445647	690343	825438	2.52506e+06	2.58665e+06	3.38502e+06	1.85413e+06	1.23992e+06	1.11354e+06	1.14105e+06	1.98662e+06	1.36684e+06	1.24015e+06	1.39451e+06
M133T97	133.051	96.9	1.6	4.00452e+06	3.70975e+06	7.32048e+06	3.48129e+06	7.5843e+06	951032	7.39981e+06	7.03784e+06	5.91066e+06	3.17078e+06	1.17765e+07	6.62276e+06	6.72119e+06	7.39393e+06	4.12631e+06	8.17926e+06	1.51727e+07	9.48149e+06	1.04266e+07	9.96327e+06	1.06285e+07	7.47106e+06	1.27404e+07	1.00707e+07	3.44042e+06	5.26491e+06	5.20798e+06	5.24481e+06	6.20317e+06	6.17301e+06	6.22026e+06
M134T103	134.028	103.1	1.7	393611	421372	108037	476800	87321.9	269558	320328	236833	209064	189809	156030	158506	200951	71152.1	314632	186361	270242	88215.6	342161	193805	243219	189296	203648	196386	208281	222889	145206	209502	226076	227355	100901
M134T111	134.074	111.5	1.9	47882.6	8971.42	69267.9	36900.6	74438.4	73045.3	76825.1	58991.7	88347.4	72806.9	96618.5	101923	59042.4	68049.3	97527.4	24891.4	77897.6	19150.6	45399.4	60294.6	57755.2	88961.2	23678.4	82278	46377.4	46410.6	46360.1	46729.5	32271.3	28436.9	43332.9
M134T114	134.008	113.7	1.9	108517	108743	113631	29619	142789	148713	175837	44712.4	121316	186050	75466.5	222881	117426	145061	191387	125275	125865	128353	100994	113701	35137.8	204962	109835	110780	110493	109811	51982.2	112066	137447	93759.6	99212.2
M134T126	134.018	125.7	2.1	36809.7	17984.8	25555.8	21528	34756	22106	47416.6	46773.2	440084	293315	712974	1.13734e+06	518169	614043	785921	671681	774700	56427.8	538388	58611.5	44958.9	798931	487793	169078	294515	278422	298515	267812	122692	295274	285270
M134T184	134.047	183.5	3.1	2.2212e+07	2.50845e+07	2.007e+07	2.04493e+07	2.89576e+07	2.26782e+07	1.83365e+07	2.43746e+07	2.11738e+07	2.66495e+07	2.1304e+07	1.80421e+07	2.66583e+07	2.23922e+07	1.64643e+07	2.6927e+07	1.79654e+07	2.19956e+07	2.60229e+07	2.32333e+07	2.30047e+07	2.20831e+07	2.4121e+07	1.52167e+07	1.12587e+07	1.71535e+07	1.60015e+07	1.92923e+07	1.89793e+07	2.19334e+07	1.90315e+07
M134T243	134.047	243.4	4.1	1.99755e+07	1.17207e+08	1.06068e+07	1.14154e+07	8.64984e+06	5.79148e+06	1.3329e+07	1.03397e+07	4.37894e+06	1.04042e+07	3.53926e+06	3.97599e+06	2.09088e+07	5.32207e+06	3.19298e+06	4.54222e+06	3.92079e+06	5.10276e+06	1.23097e+07	1.81418e+07	2.45653e+06	1.96481e+06	2.17795e+06	4.45653e+06	1.1887e+07	1.18872e+07	1.21032e+07	1.30347e+07	1.18573e+07	1.18786e+07	1.22578e+07
M134T284	134.018	284.3	4.7	866322	1.01661e+06	845413	912295	917976	412177	1.0656e+06	763518	277476	172603	304369	178272	266756	222121	149685	191520	675664	350815	630425	641157	638498	139731	297484	490802	553036	555691	556480	598694	538721	526159	466084
M134T31	133.924	30.8	0.5	38334.4	34260.2	49355.8	39285.5	46226.4	54477	66093.6	54751.3	109799	83215.4	84846.8	75606.7	40045.8	108590	77478.2	80461.4	72422.3	34329.1	62755.9	86169.8	71778.8	65044.1	59578.6	50425.6	63195.8	64064.3	63032.5	64199.1	62827	62825.8	61967.9
M134T335	134.048	334.9	5.6	2.70792e+06	1.50674e+06	3.45902e+06	1.39882e+06	2.49227e+06	2.23842e+06	2.99106e+06	1.87955e+06	3.1205e+06	2.29724e+06	4.87699e+06	2.65398e+06	427615	2.77881e+06	1.37542e+06	1.69413e+06	2.55541e+06	379202	1.06194e+06	3.77815e+06	2.67483e+06	2.92194e+06	1.36818e+06	2.60704e+06	2.05313e+06	2.05364e+06	1.81151e+06	1.92367e+06	2.05203e+06	2.15158e+06	2.03804e+06
M134T378	134.047	378	6.3	1.73747e+06	1.73074e+06	1.82648e+06	1.87184e+06	1.94559e+06	2.00363e+06	1.84649e+06	2.19853e+06	2.11543e+06	1.48018e+06	1.86332e+06	1.80085e+06	2.94775e+06	1.77212e+06	2.17922e+06	2.03995e+06	1.73307e+06	2.05246e+06	2.55627e+06	1.80894e+06	1.92848e+06	1.94166e+06	2.03883e+06	2.07788e+06	1.34671e+06	1.86924e+06	1.97093e+06	1.85402e+06	2.02023e+06	2.11799e+06	1.96486e+06
M134T433	134.048	433	7.2	3.10266e+06	7.07023e+06	3.72525e+06	9.53344e+06	2.36837e+06	2.41503e+06	4.60218e+06	4.49163e+06	1.23214e+06	3.73752e+06	2.57486e+06	3.53658e+06	3.224e+06	2.8942e+06	2.82929e+06	1.91938e+06	2.17307e+06	3.14066e+06	3.01072e+06	1.93726e+06	3.09226e+06	2.37139e+06	1.21846e+06	2.85579e+06	2.36826e+06	2.52183e+06	2.53408e+06	2.37106e+06	2.26837e+06	2.52132e+06	3.46011e+06
M134T456	134.036	455.7	7.6	81676.9	59827.3	92963.4	154342	169764	37156.4	72511.6	89167.7	141746	369881	105271	146409	1.77418e+06	320308	290071	286872	575567	3.62646e+06	581826	175192	611706	206719	979352	314621	514678	497059	514657	359641	514396	497061	496857
M134T74	134.018	74.4	1.2	6.40736e+07	7.92405e+07	1.20407e+08	1.12708e+08	3.97063e+07	3.78584e+07	4.09507e+07	9.51188e+07	1.39524e+08	3.9254e+07	9.88268e+07	1.30277e+07	1.00494e+08	8.12994e+07	1.23471e+08	3.89698e+07	1.73323e+08	4.09102e+07	9.562e+07	1.24622e+08	8.98981e+07	1.01059e+08	1.43161e+08	3.96851e+07	8.4151e+07	6.09605e+07	5.92544e+07	5.98711e+07	5.84546e+07	6.69975e+07	7.42514e+07
M135T122	135.031	121.9	2	9.02346e+08	2.53612e+09	6.42585e+08	2.72171e+09	1.0328e+09	9.08379e+08	6.36427e+08	5.42777e+08	7.25102e+08	3.45646e+08	6.32078e+08	3.78718e+08	5.68606e+08	5.02071e+08	3.97222e+08	4.50551e+08	1.0408e+09	4.28482e+08	1.23418e+09	9.03516e+08	8.05714e+08	4.61979e+08	7.47568e+08	8.28155e+08	6.90743e+08	7.98422e+08	8.15196e+08	8.00297e+08	8.07683e+08	8.18284e+08	8.22053e+08
M135T138	134.865	137.6	2.3	7.04163e+06	6.96296e+06	6.19468e+06	6.68444e+06	1.08674e+07	3.01954e+06	5.63865e+06	7.67053e+06	4.38932e+06	4.10587e+06	6.00783e+06	4.6074e+06	4.95284e+06	4.25771e+06	5.49663e+06	5.99967e+06	1.05349e+07	7.04616e+06	9.04101e+06	9.48149e+06	7.76401e+06	5.72029e+06	5.52676e+06	7.28954e+06	6.70696e+06	5.928e+06	6.99985e+06	6.76435e+06	6.78927e+06	6.91312e+06	6.70821e+06
M135T148	135.031	148.5	2.5	1.6973e+08	2.00227e+08	1.72964e+08	1.62541e+08	2.21471e+08	1.58121e+08	1.52482e+08	3.61251e+08	1.93288e+08	1.9234e+08	2.5705e+08	2.87385e+08	1.96483e+08	2.04882e+08	2.73911e+08	2.23032e+08	1.98142e+08	2.33591e+08	4.04006e+08	2.12418e+08	2.90551e+08	3.139e+08	2.56263e+08	2.21502e+08	2.00954e+08	2.24199e+08	1.94509e+08	2.06958e+08	2.06673e+08	2.01679e+08	2.06893e+08
M135T149_2	135.073	148.6	2.5	104536	142712	132154	115898	104999	96992.7	155962	132581	156641	70739.2	138021	143269	113223	115970	59179.3	47304.2	153085	198492	53368.6	41571.2	69446.6	167847	102101	123296	100539	134707	99979.9	116074	95772.9	135952	92284.8
M135T165	135.032	165.2	2.8	3.79796e+07	3.04537e+07	3.29709e+07	3.59399e+07	2.70054e+07	2.25629e+07	4.00955e+07	2.57234e+07	1.31089e+07	4.21587e+07	3.77614e+07	4.03356e+07	1.61912e+07	1.63052e+07	1.41009e+07	1.94277e+07	4.03673e+07	1.75015e+07	3.0272e+07	2.85249e+07	3.56719e+07	1.18274e+07	1.93755e+07	3.78594e+07	2.5583e+07	2.66051e+07	2.6591e+07	2.72995e+07	2.38662e+07	2.88104e+07	2.56908e+07
M135T183	135.051	183.1	3.1	1.8678e+06	1.65776e+06	1.30148e+06	1.50916e+06	1.69008e+06	1.04861e+06	1.24901e+06	1.17859e+06	857276	612406	1.00792e+06	552687	1.47308e+06	521025	163979	1.07455e+06	1.49312e+06	1.36678e+06	1.47041e+06	1.54226e+06	1.08769e+06	145563	1.12723e+06	1.09889e+06	1.04385e+06	1.0715e+06	1.08463e+06	1.08491e+06	1.08464e+06	1.0851e+06	1.02179e+06
M135T243	135.051	243.3	4.1	887647	1.14608e+06	729544	570864	1.60948e+06	940020	862860	53838.8	664041	322115	138443	246555	122704	108596	1.09405e+06	1.59767e+06	214725	89065.5	296748	2.36444e+06	61775.7	707349	340387	83775.8	615193	578036	309960	485983	481283	616835	612648
M135T251	135.032	250.6	4.2	1.11676e+07	1.32242e+07	6.88111e+06	1.34535e+07	9.24329e+06	5.30611e+06	9.22603e+06	1.44971e+07	9.96338e+06	8.46037e+06	8.23732e+06	9.64474e+06	9.06224e+06	7.25706e+06	9.07342e+06	1.25201e+07	1.66058e+07	1.72787e+07	1.73214e+07	1.1133e+07	1.04882e+07	1.181e+07	1.19522e+07	1.04026e+07	1.14701e+07	1.08946e+07	1.02994e+07	9.68028e+06	1.16737e+07	1.31172e+07	1.05671e+07
M135T31	134.894	30.7	0.5	4.51782e+06	4.70976e+06	5.97726e+06	5.95953e+06	5.78277e+06	2.24748e+06	4.04217e+06	8.74732e+06	4.25916e+06	8.41908e+06	5.41498e+06	6.20886e+06	2.68501e+06	8.85735e+06	5.96559e+06	4.72993e+06	8.10933e+06	3.86569e+06	4.71627e+06	5.21422e+06	6.81413e+06	7.0861e+06	7.10234e+06	1.00827e+07	7.49836e+06	5.82485e+06	6.16984e+06	5.83131e+06	6.17269e+06	5.83765e+06	5.84679e+06
M135T327	135.051	326.6	5.4	132034	24949.7	106832	20428.6	163183	124509	86791.7	24746.5	105381	114374	80964.6	164261	120801	101575	110761	93647.2	100472	80174.4	26809	97358.1	92933.5	107092	91239.1	94594.6	33257.8	107133	102103	113078	113586	112374	110987
M135T328	135.02	327.8	5.5	164619	147823	202653	80648.4	84666.6	276898	239842	162520	190698	386301	398802	341787	412500	368957	150266	260099	95872.1	439519	278595	524907	132175	309504	421507	201946	71038.9	208007	169671	201585	177475	209207	208039
M135T335	135.051	334.9	5.6	4084.86	7325.01	26739.5	14671.9	4977.74	16590	24808.7	14101.5	91666.4	89864.2	96438	31943.8	68575	108802	90004.1	37744.9	7540.9	109983	36084.7	30055.1	40451.2	78461.6	62815.2	82534.4	58385.6	48053.2	57476.6	50819	50834.4	37967.7	43465.7
M135T37	134.865	37	0.6	1.39324e+07	7.7551e+06	1.16157e+07	1.28851e+07	1.51631e+07	4.95889e+06	1.02427e+07	8.88023e+06	9.78266e+06	1.3783e+07	1.08153e+07	3.74986e+06	4.59806e+06	8.80815e+06	5.39624e+06	5.33998e+06	1.45106e+07	1.12068e+07	1.46226e+07	1.55261e+07	1.91079e+07	4.9031e+06	1.82646e+07	1.38659e+07	8.74657e+06	7.5791e+06	8.06668e+06	8.05336e+06	7.13663e+06	8.9582e+06	8.65224e+06
M135T433	135.051	433.1	7.2	53223.2	28115.8	47692.7	156606	86829.2	39466.5	48073.1	43575.3	126000	120676	81543	95374.2	452882	123598	157939	173536	224543	405390	502224	78582.6	158522	82084.3	258402	268711	135338	60980.7	143709	143434	135723	143551	142907
M135T521	135.046	520.6	8.7	1.17236e+06	1.25672e+06	1.08575e+06	438617	1.52789e+06	304488	1.90434e+06	1.30741e+06	1.71047e+06	3.46566e+06	962616	2.31129e+06	185051	2.16421e+06	4.3276e+06	3.97893e+06	3.90441e+06	268923	1.82937e+06	1.97258e+06	1.73189e+06	1.96163e+06	1.55083e+06	2.42929e+06	1.71534e+06	1.92688e+06	1.65425e+06	1.71188e+06	1.71819e+06	1.64619e+06	1.41412e+06
M135T528	135.082	528.5	8.8	81831.7	80752.9	87471.3	89853.5	50607.5	72927.3	25591.4	95880.4	33170	17590.2	19860.1	47959.8	37590.1	50063.6	30294	15212.6	26986.1	5775.08	38143.7	55930.3	29303	24124.7	29367.4	36470.7	42736.3	42787.9	39908.4	42825.9	43174.3	33857	27170.5
M135T56	134.865	55.6	0.9	8.16323e+06	3.70451e+06	1.2229e+07	4.21749e+06	1.31209e+07	1.198e+07	4.05867e+06	1.3108e+07	2.8274e+06	1.8973e+07	3.24939e+06	8.86196e+06	9.35472e+06	1.25269e+07	1.44506e+07	2.86613e+06	3.21868e+06	2.30979e+06	1.26839e+07	1.44554e+07	1.16282e+07	9.87056e+06	1.00125e+07	6.26997e+06	1.25931e+07	7.32226e+06	8.50741e+06	4.82118e+06	8.4819e+06	7.02317e+06	8.49388e+06
M135T74	135.018	74.4	1.2	4.15307e+06	1.73528e+07	8.76206e+06	3.37972e+07	2.14501e+07	5.08123e+06	3.1926e+07	3.53457e+06	1.80869e+07	1.87475e+07	3.81093e+07	3.90375e+07	3.03987e+07	3.55017e+07	1.36906e+07	2.50433e+07	6.27361e+06	1.10773e+07	4.75608e+06	1.39061e+07	3.45858e+06	1.85738e+07	7.74883e+06	2.62933e+07	1.28532e+07	1.97154e+07	1.30845e+07	1.45714e+07	1.07449e+07	1.24398e+07	1.7728e+07
M135T798	134.865	797.6	13.3	2.50669e+06	2.828e+06	2.26091e+06	2.88311e+06	3.57833e+06	2.07564e+06	3.24223e+06	2.07314e+06	2.43735e+06	3.06737e+06	2.57349e+06	4.27209e+06	3.14755e+06	2.57687e+06	3.55155e+06	3.14379e+06	3.10301e+06	2.24101e+06	4.01872e+06	3.2674e+06	3.25327e+06	3.27152e+06	3.10803e+06	4.08605e+06	2.65356e+06	2.71721e+06	3.00566e+06	2.75966e+06	994739	2.94694e+06	2.94938e+06
M135T836	134.895	836.4	13.9	3.49216e+07	5.01416e+07	3.49653e+07	6.81004e+07	3.69998e+07	4.12685e+07	3.41526e+07	3.4694e+07	5.12579e+07	4.97078e+07	5.41806e+07	4.65446e+07	6.6959e+07	7.4146e+07	5.76954e+07	5.50257e+07	4.447e+07	4.79296e+07	5.21347e+07	5.89717e+07	2.44771e+07	2.53498e+07	5.10756e+07	1.64838e+07	4.48771e+07	4.79154e+07	4.43422e+07	4.78332e+07	3.99915e+07	4.80447e+07	4.78107e+07
M136T101	135.988	100.7	1.7	2.3871e+06	481728	2.84119e+06	534499	1.25999e+06	224260	2.91165e+06	487523	2.29371e+06	1.6262e+06	600296	1.54458e+06	1.40329e+06	2.34635e+06	1.74886e+06	1.76492e+06	1.85773e+06	280396	339769	1.70531e+06	1.9501e+06	404008	230922	1.71006e+06	1.52372e+06	1.46806e+06	1.47553e+06	589186	1.43054e+06	1.38008e+06	1.38786e+06
M136T102	135.971	102	1.7	5.18768e+06	5.3141e+06	6.34377e+06	7.05134e+06	6.52247e+06	7.88099e+06	8.17946e+06	7.03277e+06	1.16975e+07	8.96432e+06	9.48155e+06	2.96316e+06	2.659e+06	9.09654e+06	4.72576e+06	1.05709e+07	2.42797e+06	1.84231e+06	549531	5.65906e+06	1.90617e+06	8.60479e+06	1.89674e+06	9.47766e+06	4.09786e+06	4.09681e+06	4.58686e+06	4.34727e+06	6.64081e+06	4.02659e+06	5.87343e+06
M136T122	136.034	121.9	2	2.79555e+07	2.02188e+07	3.70073e+07	2.61583e+07	2.94064e+07	2.33268e+07	2.76905e+07	3.96586e+07	4.39633e+07	4.8881e+07	4.84423e+07	4.26947e+07	5.19292e+07	5.95896e+07	5.16046e+07	6.45343e+07	6.23503e+07	6.52585e+07	6.49026e+07	4.23043e+07	5.83686e+07	4.41287e+07	3.96618e+07	5.74028e+07	4.05871e+07	4.30649e+07	4.21807e+07	4.40415e+07	4.40276e+07	4.76641e+07	4.47376e+07
M136T148	136.034	148.5	2.5	9.83559e+06	8.00009e+06	2.38364e+06	728762	2.31529e+07	7.00807e+06	1.52085e+06	2.5386e+07	548683	1.0742e+07	1.50823e+06	1.05826e+06	676904	8.49816e+06	1.37922e+07	1.33416e+07	2.09622e+06	9.23467e+06	1.19153e+06	3.80046e+07	1.33857e+06	1.19725e+07	2.04113e+06	5.08307e+07	1.12226e+07	1.09405e+07	1.09541e+07	1.12177e+07	1.1884e+07	9.80369e+06	1.12246e+07
M136T165	136.034	165.5	2.8	1.16564e+06	845025	1.15956e+06	1.58713e+06	1.13707e+06	246845	975922	1.03763e+06	1.19153e+06	1.77702e+06	1.15867e+06	1.61112e+06	1.41068e+06	2.0894e+06	2.00201e+06	2.11969e+06	1.78823e+06	834410	2.02316e+06	1.27306e+06	1.59757e+06	825351	1.14424e+06	1.34224e+06	1.36666e+06	1.31015e+06	1.42335e+06	1.31746e+06	1.30984e+06	1.31046e+06	1.30973e+06
M136T251	136.034	250.6	4.2	591665	628433	683804	579889	630822	326401	1.01387e+06	835748	712195	888646	707055	793889	510512	1.12221e+06	815972	880143	451986	724214	505432	156595	507664	1.00128e+06	437267	1.18141e+06	540235	474096	536320	510281	544853	539966	465063
M136T31	135.894	30.7	0.5	241338	304301	225139	293186	216855	209983	195995	198759	1.06774e+06	850643	958819	863045	757523	810177	927388	824514	222522	178059	997737	780968	205502	962446	1.53282e+06	963986	708910	615655	580461	695133	702377	698208	561016
M136T455	136.051	455.1	7.6	905161	1.14459e+06	1.22062e+06	1.12861e+06	1.03677e+06	1.33375e+06	960997	1.11851e+06	1.29167e+06	1.2242e+06	1.12311e+06	1.21712e+06	1.25262e+06	959705	1.10783e+06	1.12152e+06	1.23676e+06	1.50319e+06	1.0797e+06	1.19813e+06	1.27848e+06	1.72858e+06	1.61509e+06	899178	1.11654e+06	1.18755e+06	1.25872e+06	1.27572e+06	1.28487e+06	1.08421e+06	1.26863e+06
M136T478	136.051	478.3	8	901744	2.11898e+06	4.03779e+06	6.05364e+06	2.29337e+06	3.4953e+06	3.24005e+06	1.29285e+06	1.09689e+06	718250	2.96156e+06	1.85259e+06	871836	2.20722e+06	850034	743835	1.72694e+06	719676	3.14515e+06	2.67666e+06	878064	2.28515e+06	3.10877e+06	918057	1.83547e+06	1.33985e+06	1.54089e+06	1.44234e+06	1.9049e+06	1.65746e+06	1.6553e+06
M136T520	136.05	520.2	8.7	841101	382656	649233	276494	937020	764008	1.16529e+06	659711	606780	50870.9	1.16339e+06	240564	54210.2	74462	24624.4	54200.1	85561.9	41248.6	5854.4	238881	487057	473124	15310.2	536302	317481	434259	331632	387868	421228	424225	467219
M136T603	136.017	603.2	10.1	135902	51914.7	111961	74262.3	75483.9	45296.9	116882	97201.3	159346	99309.8	112052	123795	72022.9	38379.7	97915.7	109437	117851	77012.1	171077	49734.3	64731.7	86257.7	194323	83537	87345.3	72719.6	88172.1	88192.2	67767.2	101775	85336.3
M136T732	135.971	732.2	12.2	1.80544e+06	1.19546e+06	1.93704e+06	1.32032e+06	1.7771e+06	808430	2.48593e+06	1.69161e+06	1.91383e+06	2.90589e+06	2.3563e+06	2.07768e+06	1.43581e+06	2.26668e+06	1.40628e+06	2.30794e+06	1.53145e+06	498392	1.04197e+06	1.61297e+06	1.95952e+06	1.3108e+06	1.65199e+06	2.46327e+06	1.53962e+06	1.52633e+06	1.64863e+06	1.5198e+06	1.98787e+06	1.642e+06	1.52873e+06
M136T74	136.022	74.1	1.2	374137	519617	459082	530173	443117	363361	450325	475519	476519	544527	536897	504301	367613	587363	487991	550867	523366	672990	537641	708217	581365	558131	529522	578926	499048	498989	495796	499074	492554	499019	462378
M136T766	135.971	766.4	12.8	3.37655e+06	4.03022e+06	4.32044e+06	3.58277e+06	2.14969e+06	2.12163e+06	2.8697e+06	1.60097e+06	1.54616e+06	723676	2.12318e+06	1.02904e+06	1.35249e+06	2.70697e+06	777434	2.08222e+06	2.40213e+06	2.04384e+06	2.15e+06	2.36023e+06	1.71571e+06	2.82692e+06	2.15285e+06	1.80103e+06	2.94013e+06	2.80522e+06	1.49416e+06	2.61326e+06	2.7986e+06	2.80854e+06	2.61727e+06
M136T82	136.033	81.7	1.4	4.33404e+06	5.65614e+06	3.84959e+06	3.24264e+06	5.026e+06	3.10805e+06	3.2267e+06	7.08017e+06	4.6732e+06	4.67509e+06	3.43676e+06	1.95728e+06	4.50743e+06	1.84379e+06	4.48527e+06	3.35042e+06	4.53686e+06	6.28152e+06	3.83294e+06	5.55402e+06	4.407e+06	5.36447e+06	2.78548e+06	4.73877e+06	4.12087e+06	4.3356e+06	1.74658e+06	4.12049e+06	3.3468e+06	3.6103e+06	3.51067e+06
M136T837	135.971	836.7	13.9	2.87795e+06	3.43009e+06	3.25047e+06	4.05471e+06	2.56195e+06	4.37025e+06	3.4837e+06	3.84109e+06	2.87506e+06	5.0141e+06	2.68738e+06	2.51936e+06	2.67196e+06	2.63313e+06	5.12761e+06	5.45261e+06	4.98536e+06	4.84405e+06	1.96096e+06	4.4604e+06	3.57047e+06	2.07823e+06	2.37689e+06	1.99704e+06	4.55344e+06	4.48625e+06	4.21428e+06	4.49077e+06	2.51235e+06	4.13309e+06	2.16299e+06
M137T116	137.024	116.2	1.9	149284	129699	336349	281319	461605	300829	458637	456407	378081	247279	767645	575640	360667	531571	474327	395024	414005	525116	419517	191473	491355	534043	460683	624478	347898	450489	442587	484379	448363	459531	448545
M137T122	137.035	121.9	2	2.15275e+06	2.43192e+06	1.7661e+06	2.2565e+06	2.08773e+06	3.27654e+06	3.91799e+06	2.35223e+06	2.63744e+06	2.25485e+06	2.75332e+06	2.55516e+06	2.40882e+06	2.56261e+06	2.54474e+06	2.9065e+06	3.05809e+06	2.05575e+06	4.12229e+06	4.18691e+06	2.94247e+06	2.36824e+06	2.4462e+06	1.99047e+06	2.49875e+06	2.96304e+06	2.45338e+06	2.41319e+06	2.49372e+06	2.46765e+06	2.45261e+06
M137T137	136.863	136.9	2.3	2.3203e+06	1.15034e+06	3.08608e+06	2.56485e+06	1.96349e+06	550983	3.03752e+06	2.28866e+06	1.86488e+06	2.66558e+06	2.58012e+06	2.92288e+06	2.49612e+06	3.89947e+06	4.62745e+06	4.25509e+06	2.2736e+06	796071	3.64137e+06	2.8095e+06	2.55178e+06	1.56855e+06	2.13413e+06	2.79913e+06	2.49797e+06	2.14104e+06	2.29939e+06	2.29772e+06	2.35371e+06	2.33623e+06	2.29761e+06
M137T148	137.036	147.7	2.5	1.42788e+06	1.2681e+06	1.22514e+06	1.50791e+06	1.09185e+06	951684	756730	1.03799e+06	761067	353554	603259	819039	1.21005e+06	646621	741214	657046	1.00815e+06	1.24207e+06	1.62402e+06	1.08183e+06	915750	1.23177e+06	1.01815e+06	836134	1.01865e+06	1.03653e+06	1.02708e+06	1.04803e+06	1.1113e+06	1.04745e+06	896271
M137T294	137.036	293.6	4.9	28396.9	167289	30932.4	23997.6	32890.8	156729	9498.06	114360	804277	1.11914e+06	930738	701768	581855	997962	980752	1.17061e+06	37513.7	611352	45656.1	318643	73409.3	1.20009e+06	1.38456e+06	2.0167e+06	626349	544289	637231	628257	624166	637014	686550
M137T31	136.891	30.7	0.5	2.2042e+06	1.01858e+06	774849	1.3697e+06	876725	2.56888e+06	1.23141e+06	1.34799e+06	2.32143e+06	1.19406e+06	1.52353e+06	922000	3.83309e+06	1.65345e+06	4.16063e+06	1.15265e+06	1.83954e+06	1.08054e+06	2.49323e+06	919990	1.65537e+06	5.07187e+06	1.23701e+06	789915	1.94878e+06	1.51026e+06	1.5419e+06	1.62746e+06	2.72948e+06	1.54529e+06	1.63938e+06
M137T366	137.024	365.9	6.1	3.54489e+06	2.41496e+06	2.56282e+06	2.70136e+06	3.59572e+06	2.2298e+06	3.61178e+06	2.13293e+06	2.74786e+06	2.42323e+06	3.47511e+06	2.23772e+06	2.2356e+06	1.99613e+06	2.63545e+06	2.08674e+06	2.95006e+06	1.91534e+06	2.38829e+06	2.68889e+06	3.29597e+06	3.29761e+06	2.28159e+06	3.05508e+06	2.81127e+06	2.30685e+06	2.81451e+06	2.72812e+06	2.80933e+06	2.51772e+06	2.81279e+06
M137T54	136.91	53.7	0.9	522331	884400	930792	650614	599035	716005	906736	583639	885515	838270	783626	787797	756716	462255	834489	851799	640607	879955	1.04511e+06	612769	731304	493291	965382	660171	743335	717201	743521	717115	816862	718216	701231
M137T56	136.863	55.9	0.9	2.65707e+06	3.47738e+06	2.75747e+06	1.89468e+06	1.54162e+06	3.57076e+06	3.53237e+06	9.49537e+06	3.01327e+06	4.67942e+06	2.38771e+06	2.63727e+06	2.92021e+06	2.11071e+06	2.51542e+06	8.02209e+06	1.86323e+06	3.31768e+06	4.31405e+06	4.50271e+06	6.15298e+06	2.31611e+06	3.66928e+06	6.68338e+06	1.36257e+06	3.23567e+06	3.06355e+06	3.47234e+06	2.58538e+06	3.35362e+06	3.34478e+06
M137T72	136.965	71.7	1.2	1.35029e+06	991215	1.37763e+06	1.01312e+06	1.62746e+06	571212	1.94217e+06	1.19128e+06	1.22845e+06	1.42847e+06	1.28434e+06	1.44737e+06	792425	1.26389e+06	1.3189e+06	1.16632e+06	1.62632e+06	604866	962899	1.17924e+06	1.1379e+06	804139	588612	1.02734e+06	977761	1.05384e+06	1.078e+06	1.07715e+06	1.17935e+06	1.05285e+06	1.0526e+06
M137T82	136.918	81.8	1.4	1.18773e+06	222733	1.61228e+06	444348	1.05483e+06	454178	2.23e+06	1.36196e+06	1.49487e+06	2.22456e+06	864449	1.44662e+06	1.33812e+06	1.37744e+06	1.64604e+06	2.70266e+06	1.86516e+06	1.18728e+06	1.23812e+06	1.11804e+06	892287	1.77791e+06	1.23215e+06	1.58658e+06	809672	956704	1.04889e+06	973036	1.03547e+06	856051	1.03696e+06
M137T837	136.892	836.5	13.9	1.23795e+07	1.01805e+07	1.16082e+07	7.93552e+06	1.12935e+07	7.81428e+06	1.11189e+07	1.09618e+07	1.89448e+07	3.04877e+07	2.00239e+07	1.06624e+07	1.0989e+07	1.61246e+07	2.63199e+07	3.16372e+07	1.38578e+07	1.77414e+07	1.50695e+07	9.97756e+06	2.15753e+07	1.48838e+07	2.01915e+07	1.46184e+07	1.47789e+07	1.41931e+07	6.62663e+06	1.37354e+07	1.37928e+07	1.4792e+07	1.47898e+07
M137T94	137.036	93.5	1.6	2.94803e+06	3.1569e+06	3.6917e+06	3.8514e+06	3.64184e+06	2.95009e+06	3.84028e+06	3.15525e+06	6.46183e+06	9.45211e+06	8.24182e+06	9.05429e+06	9.78259e+06	8.49095e+06	9.93269e+06	1.04215e+07	5.36469e+06	7.15985e+06	6.92925e+06	5.04927e+06	4.01403e+06	6.4375e+06	5.85953e+06	6.60081e+06	5.75027e+06	5.9162e+06	5.78106e+06	5.75011e+06	5.91633e+06	5.70774e+06	5.78107e+06
M138T224	138.056	223.8	3.7	609099	554195	611406	875328	412848	581756	853254	851239	1.09494e+06	1.75451e+06	1.54831e+06	1.11632e+06	870475	1.26133e+06	1.84435e+06	1.37289e+06	1.17922e+06	1.75263e+06	1.02205e+06	1.22487e+06	995931	1.85653e+06	2.21895e+06	2.03253e+06	1.216e+06	1.21641e+06	1.21683e+06	1.21532e+06	1.37307e+06	1.30282e+06	1.21696e+06
M138T256	138.056	255.7	4.3	635864	702982	589796	828949	328648	545760	490567	856221	876366	798507	166394	632258	666652	728720	650999	222212	456576	1.32796e+06	787576	584748	776514	674550	824472	318507	567245	432445	606375	446837	461636	601070	482944
M138T31	137.892	30.7	0.5	32854.4	185169	187565	139504	144011	117409	226240	118824	146170	253545	158736	170781	235605	158459	236412	323736	275673	115500	263640	223086	175024	174252	201496	236377	189843	243490	186633	205009	198800	204868	203498
M138T336	138.056	335.9	5.6	279736	239027	333518	377282	275830	217749	354463	315693	1.29203e+06	1.56399e+06	1.16116e+06	1.25517e+06	854125	1.40994e+06	1.75078e+06	1.03292e+06	808772	680694	604264	983569	481560	949010	661282	948159	802885	673458	709581	707273	738777	685509	739738
M138T611	138.02	611	10.2	6.93426e+06	5.46838e+06	7.30213e+06	6.41495e+06	4.53719e+06	4.13082e+06	1.59649e+06	9.92412e+06	3.10234e+06	1.97407e+06	3.19539e+06	1.929e+06	2.34916e+06	1.61692e+06	2.19494e+06	2.71087e+06	3.86781e+06	3.4782e+06	3.76097e+06	3.47931e+06	3.1562e+06	2.00974e+06	4.6024e+06	2.36283e+06	4.21477e+06	5.28768e+06	5.2963e+06	5.28894e+06	5.2926e+06	5.28448e+06	4.3006e+06
M138T637	138.02	637	10.6	318821	716989	760285	840410	995884	1.17429e+06	1.80827e+06	1.11099e+06	781596	382424	696861	432373	323770	653375	484265	455944	760263	424630	1.6545e+06	1.014e+06	838355	851509	396098	252119	1.17173e+06	1.17118e+06	1.12334e+06	1.17084e+06	1.17082e+06	1.17151e+06	980548
M139T118	139.004	118.4	2	353265	154520	483193	257316	433088	361774	430798	349576	648710	999395	202235	597686	148593	1.32122e+06	714137	976367	167300	237666	128819	210929	770514	125445	723430	766980	375572	395360	265879	402223	388303	424294	373960
M139T31	138.89	30.7	0.5	58709.7	56796.2	55166.2	61568.1	71062.9	26235.5	453731	452175	70842.7	71150.8	78212.1	424888	117564	45722.1	62336.6	53324.1	73430.6	74660.4	74799.3	57980.9	42829.5	65678.6	64188.5	436044	77629.9	44139.7	65604.3	59097.8	65647.3	60242	65490
M139T37	138.86	37	0.6	463480	445282	449507	431738	450908	122217	433341	406514	518409	457408	301334	466028	463278	426702	575041	460548	419304	429700	522519	529541	432885	607510	600208	449676	449247	454402	452392	454366	471924	449175	441684
M139T611	139.023	611.1	10.2	496130	570858	460034	596085	394833	960030	65218.9	743935	213525	144513	233003	197279	148817	110538	139632	172228	305191	213613	272978	412434	346440	150013	121231	265877	313740	319040	202976	312885	296224	316027	294887
M139T71	139.04	70.8	1.2	519482	614519	500398	506671	572869	290076	609851	497144	306478	434027	339603	445086	296153	216956	577451	388540	470220	335695	443104	441526	418159	256911	265036	307375	359277	359235	341948	198354	313446	375158	355450
M139T77	138.98	77	1.3	3.4569e+06	3.33189e+06	4.17607e+06	2.99185e+06	5.00691e+06	3.94145e+06	3.93776e+06	3.17129e+06	2.79099e+06	3.31417e+06	3.08784e+06	4.57273e+06	3.50302e+06	3.01438e+06	3.6046e+06	3.50364e+06	2.72947e+06	2.61033e+06	2.57791e+06	3.29703e+06	2.30551e+06	3.33008e+06	2.72931e+06	2.27649e+06	3.40781e+06	3.40776e+06	3.40973e+06	3.35909e+06	3.53254e+06	3.53761e+06	3.65782e+06
M140T118	140.083	118.1	2	4.08178e+06	4.36624e+06	4.41149e+06	4.40974e+06	4.56065e+06	4.14236e+06	4.34119e+06	4.59836e+06	4.30627e+06	4.16306e+06	4.38049e+06	4.33787e+06	4.35702e+06	4.55748e+06	4.7173e+06	4.41214e+06	4.53938e+06	4.43409e+06	4.22019e+06	4.03673e+06	4.7167e+06	4.43844e+06	4.42494e+06	4.31928e+06	4.37522e+06	4.43856e+06	4.46273e+06	4.46235e+06	4.34664e+06	4.47556e+06	4.00345e+06
M140T80	140.012	80.1	1.3	2.6631e+07	3.31444e+07	2.42059e+07	3.31598e+07	2.30535e+07	3.49831e+07	2.88353e+07	3.57805e+07	1.40197e+07	1.11365e+07	2.34175e+07	3.055e+07	2.67387e+07	2.75407e+07	1.78931e+07	9.89697e+06	1.58114e+07	2.6469e+07	2.53417e+07	1.87225e+07	8.15502e+06	3.05429e+07	3.466e+07	2.28687e+07	2.21649e+07	2.65037e+07	1.59109e+07	2.31276e+07	2.95537e+07	2.89396e+07	2.89156e+07
M140T92	139.985	92.3	1.5	9.79122e+06	1.89446e+07	3.05988e+07	2.13321e+07	3.2987e+07	3.36622e+07	1.02146e+07	9.00008e+06	4.35663e+07	7.66793e+06	2.68772e+07	9.09869e+06	2.08233e+07	6.75815e+06	5.72112e+06	1.56039e+07	2.5229e+07	4.36353e+07	4.39808e+07	4.19682e+07	2.46155e+07	7.72518e+06	3.2222e+07	4.70551e+06	2.6172e+07	2.51395e+07	1.37489e+07	2.52288e+07	1.67518e+07	2.53094e+07	2.53263e+07
M141T118	141.086	118.2	2	424411	1.45323e+06	277951	239175	236365	229546	300622	268651	127041	446697	150041	130139	359959	150040	116350	129128	89329.2	68174	228538	439180	97582.2	97736.6	76492	103364	246279	256827	256824	263972	255128	266421	253977
M141T120	141.019	120.1	2	501121	608268	898426	569142	1.12213e+06	1.52951e+06	803461	624654	853338	613616	605962	871488	682937	583528	623028	655253	404199	281718	611127	585088	474844	646333	668068	171681	709726	643291	596063	659734	641721	642029	642242
M141T303	140.986	302.9	5	283279	82703.8	308220	114881	282502	430411	222126	288575	556189	130710	545313	238780	74056.7	242310	176919	531415	291870	1.01962e+06	506188	395380	93767.7	308389	935222	284383	216250	291907	195794	218184	284180	279460	284040
M141T82_2	141.056	81.5	1.4	2.05181e+06	1.50691e+06	1.82072e+06	1.6435e+06	1.52472e+06	3.60477e+06	2.10431e+06	1.84169e+06	2.59594e+06	4.07514e+06	3.69958e+06	3.93039e+06	2.85098e+06	3.7637e+06	4.15162e+06	3.42899e+06	2.34385e+06	2.48263e+06	1.85007e+06	3.37234e+06	3.55857e+06	2.8831e+06	2.90383e+06	3.00674e+06	2.99557e+06	2.95302e+06	2.7967e+06	3.41915e+06	3.04078e+06	2.79332e+06	2.79425e+06
M141T92	140.988	92	1.5	503145	502528	447238	422799	440803	462045	445495	453681	285142	410278	392577	468042	427690	441891	329871	404803	438374	452535	406324	456317	395248	384881	334395	434453	440997	467746	441155	462222	441094	416959	440896
M142T119	142.051	118.7	2	1.14029e+06	1.48571e+06	1.20411e+06	2.33043e+06	1.05452e+06	731693	2.04978e+06	2.08568e+06	1.54391e+06	1.69047e+06	1.96431e+06	1.95966e+06	2.41557e+06	2.40563e+06	2.16288e+06	2.1019e+06	2.46716e+06	2.49219e+06	2.76836e+06	2.39002e+06	2.26422e+06	2.14572e+06	2.27629e+06	1.66137e+06	2.14704e+06	2.36954e+06	1.91869e+06	2.36114e+06	2.58807e+06	2.13727e+06	2.1404e+06
M142T342	142.087	342.1	5.7	242795	274949	343165	236373	479671	373166	343033	271753	830273	393872	532265	746427	782965	303232	588323	611537	719753	932091	856794	463722	605410	394910	692087	590555	421543	421650	409549	300547	305211	419587	419409
M142T363	142.066	363.2	6.1	144911	201158	194358	148821	120614	150273	208933	69398.8	184857	168289	143963	142309	168282	162394	193796	144309	131884	156828	132002	110571	81897.9	137613	204254	106846	116938	124122	119470	119598	105286	113935	105398
M142T441	141.997	440.8	7.3	57592.1	296899	13618.6	70963	819.99	7392.9	69684.8	8381.55	2430.41	168164	1494.07	1679.6	76580	67000	64767.7	47252.8	5610.34	681.46	263632	329705	10271	3831.71	532.771	97627	86431.9	79254.4	76612	85283.6	80947.4	72859.6	82213.7
M142T92	141.98	92.3	1.5	3.39198e+06	2.46899e+06	3.78174e+06	2.88274e+06	2.7473e+06	1.11927e+06	3.70416e+06	3.54916e+06	1.23226e+06	1.42844e+06	1.63837e+06	1.70238e+06	580981	2.55649e+06	1.15849e+06	1.43322e+06	3.53208e+06	117164	3.06155e+06	3.77367e+06	3.65697e+06	1.15635e+06	725829	1.54267e+06	2.09266e+06	2.34075e+06	2.12472e+06	2.12556e+06	2.08657e+06	2.08611e+06	2.08861e+06
M143T100	143.046	99.9	1.7	2.68209e+06	3.52397e+06	1.78372e+06	715259	699776	3.75298e+06	858467	2.32873e+06	861050	2.63718e+06	2.69325e+06	790528	2.93431e+06	800670	841254	1.88116e+06	2.78222e+06	2.40393e+06	3.02433e+06	1.00333e+06	858895	2.0278e+06	4.49595e+06	548173	1.426e+06	1.28524e+06	1.00819e+06	1.00103e+06	1.07506e+06	1.014e+06	1.00935e+06
M143T109	143.035	108.7	1.8	2.31521e+06	68770.9	2.63397e+06	56843.5	2.98412e+06	2.94012e+06	4.67355e+06	3.16038e+06	3.98443e+06	4.64007e+06	4.47534e+06	1.57512e+06	1.06212e+06	1.78257e+06	1.32515e+06	1.63186e+06	727020	103199	242351	2.14602e+06	1.37439e+06	2.21064e+06	2.36332e+06	66036.5	1.98238e+06	2.1277e+06	2.07669e+06	2.07771e+06	2.2889e+06	1.82423e+06	2.12855e+06
M143T119	143.054	118.6	2	291288	366128	311836	116179	233444	168556	363394	234247	279221	332410	39313.6	267778	163023	378860	131324	344523	250240	73485.8	288059	356410	351034	266333	287209	256197	215375	215212	214882	101054	170443	186558	213849
M143T31	142.929	31.4	0.5	50159.9	48655.5	39078.3	15590.7	15128.7	15768.6	16282.4	100807	16593.7	56065	49295.5	93977.9	3189.22	7264.75	25898.7	123404	16550.3	99641.3	64552.4	15894.3	15631.4	18287.2	68819.2	160595	52078.1	71721.6	52305.3	41511.8	37914.9	37711.8	50280.3
M143T539	142.993	538.6	9	547465	135284	594917	729484	955837	715840	597145	63041.7	861285	80343.2	51806.5	92020.1	315964	55447.8	679649	105161	670799	51587.1	536781	870693	92002.7	767238	711578	15960.4	543219	542275	544034	198827	489976	528375	546826
M143T679	143.108	678.8	11.3	479568	2.47936e+06	365692	2.06614e+06	1.35933e+06	199141	1.07265e+06	743426	176705	467449	259696	277108	276706	399365	488750	347104	777451	914241	458876	827998	435751	434043	204863	346310	418594	442108	448112	484622	469576	470153	470210
M143T79	142.975	78.6	1.3	1.25862e+06	3.30507e+06	2.02908e+06	2.0623e+06	2.06776e+06	1.11086e+06	2.05257e+06	2.15956e+06	858554	813529	953780	928902	783613	726329	1.00514e+06	1.00137e+06	1.54693e+06	829374	1.3415e+06	951758	1.2895e+06	812163	801139	1.12115e+06	1.4556e+06	1.4639e+06	1.15897e+06	1.58103e+06	1.40619e+06	1.4662e+06	1.04597e+06
M143T91	143.035	90.9	1.5	4.66904e+06	3.7e+06	4.75899e+06	3.77895e+06	5.61784e+06	5.48467e+06	3.73411e+06	4.57846e+06	3.7253e+06	4.45456e+06	3.98286e+06	4.08896e+06	3.99046e+06	3.87333e+06	3.94438e+06	3.88221e+06	3.79499e+06	3.49024e+06	4.40493e+06	3.42215e+06	3.5222e+06	4.98895e+06	4.19707e+06	3.11049e+06	4.36083e+06	4.36564e+06	3.37856e+06	4.36691e+06	4.19175e+06	4.23119e+06	4.33386e+06
M144T107	144.03	107.4	1.8	2.06165e+06	2.14259e+06	2.01686e+06	2.0957e+06	1.88168e+06	1.74069e+06	1.68725e+06	1.82201e+06	2.85838e+06	1.90727e+06	2.86771e+06	3.35153e+06	2.22978e+06	2.72376e+06	1.93647e+06	2.03751e+06	2.33072e+06	2.56028e+06	4.43643e+06	2.29337e+06	2.04494e+06	2.19878e+06	3.12508e+06	2.06904e+06	2.47809e+06	2.17246e+06	2.12778e+06	2.21705e+06	2.3605e+06	2.15643e+06	731870
M144T108	144.002	107.6	1.8	333055	286205	353551	231896	301909	224267	308332	226335	308711	250524	396165	225563	121621	183235	116347	146158	243809	59991.5	196101	424462	253134	280844	106992	320324	224755	221810	221805	235718	227068	209441	221712
M144T111	144.103	111.4	1.9	7.81089e+06	7.20114e+06	8.3818e+06	6.49044e+06	8.39201e+06	6.65055e+06	1.89364e+06	6.63013e+06	7.41792e+06	7.34052e+06	6.14153e+06	6.29366e+06	9.83665e+06	6.86743e+06	8.38052e+06	8.57168e+06	6.26553e+06	9.0391e+06	8.43532e+06	8.14496e+06	7.4674e+06	6.88429e+06	8.05458e+06	6.28199e+06	6.92611e+06	7.05265e+06	7.55251e+06	6.92587e+06	7.10243e+06	6.4138e+06	7.09793e+06
M144T122	144.067	122.4	2	2.3571e+06	4.60975e+06	1.60891e+06	3.78038e+06	1.74162e+06	3.33767e+06	1.84312e+06	1.43671e+06	4.94947e+06	3.01602e+06	5.4976e+06	5.00307e+06	2.3764e+06	3.82512e+06	2.53505e+06	3.21234e+06	1.85013e+06	764182	2.19901e+06	1.86644e+06	1.42021e+06	4.36629e+06	2.25332e+06	3.61473e+06	2.03044e+06	1.93314e+06	1.93339e+06	2.03008e+06	2.02198e+06	1.35386e+06	2.30702e+06
M144T128	143.952	127.6	2.1	122813	191882	168510	174944	124333	131542	432374	143885	186033	181754	191546	238402	193357	205323	174529	154122	237174	186871	108645	126383	113268	131845	325522	176002	152725	146255	152683	138425	181705	147013	146449
M144T303	143.952	303	5	154295	229441	178153	153357	180098	59568.8	153776	168782	227916	274443	247337	285458	281109	236481	269343	195740	262613	255871	204176	266499	340703	248627	234470	278295	234523	246787	212380	242789	266817	234788	234789
M144T374	143.952	373.9	6.2	251581	489726	234443	487126	202575	631278	180468	595551	460213	298479	333355	292741	129963	260536	226989	210677	215343	5913.46	231210	286625	223207	267596	265258	259950	275919	285343	255087	269286	230004	279554	260826
M144T578	144.046	577.8	9.6	6.79448e+06	8.33583e+06	9.67965e+06	4.84898e+06	1.08784e+07	5.16489e+06	1.1951e+07	5.50706e+06	1.62711e+07	9.26438e+06	9.38569e+06	1.79444e+07	8.69514e+06	8.18688e+06	4.05701e+06	9.579e+06	7.79659e+06	1.00555e+07	7.33859e+06	1.38699e+07	1.61897e+07	1.36228e+07	1.36727e+07	7.44016e+06	8.64745e+06	1.05777e+07	9.79429e+06	7.71099e+06	1.03851e+07	1.06439e+07	1.49945e+07
M144T89	144.03	88.6	1.5	2.32836e+06	2.74091e+06	2.22284e+06	3.06804e+06	1.48687e+06	1.93381e+06	1.63723e+06	2.15955e+06	1.83776e+06	1.5949e+06	2.69754e+06	1.60034e+06	1.10755e+06	2.19858e+06	1.96261e+06	2.48814e+06	2.47476e+06	2.17884e+06	4.56287e+06	3.92228e+06	3.39834e+06	2.1064e+06	2.14121e+06	2.34248e+06	2.53172e+06	2.12031e+06	2.18418e+06	2.05622e+06	2.0115e+06	2.03412e+06	1.74151e+06
M144T92	144.067	91.7	1.5	1.5862e+07	1.32582e+07	8.01195e+06	1.2112e+07	2.80094e+06	1.34147e+07	1.07539e+07	1.84301e+07	1.34679e+07	8.90516e+06	7.57314e+06	9.50984e+06	6.11557e+06	1.04131e+07	8.23051e+06	6.69536e+06	8.93584e+06	4.82403e+06	2.2256e+07	1.4164e+07	1.5548e+07	1.19984e+07	1.25897e+07	1.7971e+07	6.9017e+06	1.18596e+07	9.32979e+06	6.45826e+06	1.16452e+07	7.22057e+06	8.43144e+06
M145T103	145.051	102.6	1.7	6.73081e+07	6.46074e+07	7.18084e+07	5.17459e+07	6.01705e+07	3.31715e+07	6.50612e+07	6.31677e+07	6.25914e+07	4.99812e+07	4.39174e+07	2.22251e+07	5.12894e+07	5.12802e+07	5.51591e+07	4.86134e+07	6.61134e+07	5.62209e+07	2.99317e+07	6.94163e+07	2.32539e+07	6.16776e+07	6.25848e+07	5.85844e+07	6.55621e+07	5.52501e+07	7.40031e+07	6.73265e+07	6.10313e+07	6.09059e+07	6.0176e+07
M145T108	145.014	107.8	1.8	5.752e+06	4.34706e+06	3.59383e+06	5.66997e+06	4.10226e+06	3.17855e+06	5.21002e+06	4.60009e+06	4.07785e+06	3.55634e+06	4.94485e+06	3.9674e+06	3.89448e+06	2.78006e+06	5.57249e+06	5.24438e+06	2.95584e+06	3.11785e+06	4.98075e+06	5.55272e+06	4.35604e+06	4.72438e+06	3.21531e+06	5.29223e+06	4.32581e+06	4.32638e+06	3.93613e+06	3.97129e+06	4.32379e+06	4.10462e+06	4.39441e+06
M145T109	145.051	109.3	1.8	3.06109e+07	1.12798e+07	3.4076e+07	1.26763e+07	2.56238e+07	1.97864e+07	2.76585e+07	2.69262e+07	2.78011e+07	2.02645e+07	3.18246e+07	2.69541e+07	1.17775e+07	2.4917e+07	2.62974e+07	6.96608e+06	2.27646e+07	1.49541e+07	7.00098e+06	6.71165e+06	2.61645e+07	2.34312e+07	1.80485e+07	2.59535e+07	2.61395e+07	2.61819e+07	2.61257e+07	1.68178e+07	2.61203e+07	2.52247e+07	2.52132e+07
M145T112	145.106	111.6	1.9	582704	762672	508806	918855	685382	649661	513396	74756.5	833250	611133	728572	790105	94651.3	363703	548705	446230	494764	72967.4	137376	641710	71938	464393	550424	781383	537469	537273	537490	528505	489563	537349	528560
M145T126	145.062	125.9	2.1	1.19788e+06	4.79908e+06	627348	5.42977e+06	1.90592e+06	3.58229e+06	562280	4.4209e+06	1.65089e+06	1.61473e+06	1.31193e+06	510701	3.66731e+06	1.80484e+07	450483	508394	1.5515e+06	1.16612e+06	610433	1.41734e+06	555967	3.56541e+06	5.27585e+06	2.55105e+06	1.36751e+06	1.27825e+06	1.55405e+06	1.26581e+06	1.53716e+06	1.97688e+06	1.37241e+06
M145T148	144.992	148.1	2.5	1.35636e+06	1.15097e+06	1.27761e+06	1.43293e+06	1.49672e+06	1.46542e+06	1.72779e+06	1.67473e+06	1.43855e+06	1.40401e+06	1.41706e+06	1.33219e+06	1.54338e+06	1.24901e+06	1.30402e+06	1.46366e+06	1.54908e+06	1.3727e+06	1.56913e+06	1.70869e+06	1.53794e+06	1.5662e+06	2.06173e+06	1.48232e+06	1.32787e+06	1.32842e+06	1.3644e+06	1.36363e+06	1.36331e+06	1.33129e+06	1.11717e+06
M145T303	145.014	302.9	5	2913.34	4912.44	5765.32	7717.81	28274.1	3313.27	4337.29	4421.84	58845.6	293940	30953	74940.4	143388	234551	195553	243919	108697	1.68115e+06	579333	6145.99	427539	141439	676665	601128	285828	91888.5	285589	286539	257523	286044	288339
M145T31	144.924	31.1	0.5	1.14942e+06	1.51987e+06	1.37468e+06	1.49642e+06	2.99843e+06	2.76115e+06	2.05514e+06	1.3627e+06	1.0649e+06	685567	1.1588e+06	1.51137e+06	429265	1.3862e+06	757326	2.19777e+06	2.28807e+06	1.6214e+06	1.54426e+06	1.49879e+06	1.54459e+06	1.84563e+06	1.02533e+06	807534	1.41315e+06	1.54539e+06	1.11728e+06	1.54898e+06	1.04146e+06	1.57948e+06	1.03898e+06
M145T374	145.014	373.8	6.2	65788.4	41835.9	41418.9	136194	180059	13026.9	25501.4	47240.4	1.28885e+06	208956	969767	1.72374e+06	1.21834e+06	1.53691e+06	836852	286885	258814	562336	572984	324081	70676.9	121422	745945	281149	495017	501615	460724	233834	493349	494883	252251
M145T378	145.087	377.5	6.3	1.10004e+06	1.48769e+06	518622	856256	1.53449e+06	164936	1.21671e+06	1.94994e+06	262790	1.14176e+06	640495	883509	813540	1.65755e+06	878950	588849	1.35171e+06	569862	1.62772e+06	687151	2.38011e+06	287706	327956	1.35005e+06	600195	555068	1.16415e+06	762741	824658	1.09548e+06	850496
M145T399	145.087	398.9	6.6	2.36312e+06	1.7828e+06	2.39529e+06	2.30358e+06	2.79476e+06	1.22602e+06	3.54725e+06	3.69891e+06	1.28253e+06	1.71177e+06	1.83034e+06	1.93339e+06	2.51714e+06	2.96245e+06	1.40454e+06	1.06863e+06	1.04777e+06	95506.8	994115	613899	961192	1.25708e+06	37936.8	883486	1.85101e+06	1.62865e+06	1.64873e+06	1.62977e+06	1.66457e+06	1.62909e+06	1.56368e+06
M145T429	144.962	428.9	7.1	1.19521e+06	1.3232e+06	1.15207e+06	1.48183e+06	1.2794e+06	353427	1.22226e+06	764020	2.3646e+06	1.16394e+06	2.15768e+06	534728	2.92357e+06	1.29224e+06	1.92329e+06	1.46402e+06	2.21845e+06	4.73708e+06	3.22545e+06	1.01826e+06	1.83924e+06	2.83674e+06	4.94921e+06	2.99654e+06	1.714e+06	1.72397e+06	2.25961e+06	1.72454e+06	1.40638e+06	1.71504e+06	1.81603e+06
M145T578	145.049	577.8	9.6	1.4855e+06	1.34148e+06	1.35863e+06	1.41113e+06	1.32563e+06	1.7374e+06	1.25763e+06	1.7842e+06	1.5853e+06	2.56579e+06	2.61087e+06	1.64096e+06	2.23623e+06	2.10034e+06	2.74281e+06	2.57445e+06	2.3061e+06	2.53957e+06	1.90273e+06	1.45299e+06	1.74274e+06	1.31374e+06	1.33174e+06	1.98601e+06	1.76847e+06	1.70293e+06	1.71344e+06	1.9011e+06	1.76968e+06	1.51977e+06	1.41501e+06
M145T61	144.924	61.4	1	280006	312901	318982	308569	335491	279479	311725	332977	393186	338226	435895	369414	315869	349222	340433	344705	363484	310503	364431	317874	326707	393435	347465	363439	322754	330801	330803	330807	335704	332568	332588
M145T741	144.992	741.3	12.4	2.13413e+07	1.21086e+07	6.12344e+06	1.44516e+07	5.71939e+06	1.83194e+07	2.24693e+07	1.52409e+07	1.2482e+07	1.51941e+07	9.20351e+06	1.99528e+07	3.40291e+06	1.46229e+07	1.53271e+07	9.48848e+06	5.82994e+06	1.28421e+07	2.16667e+07	1.83915e+07	1.71016e+07	4.5077e+06	1.76023e+07	1.92138e+07	1.51265e+07	9.04366e+06	8.47865e+06	9.58331e+06	8.27132e+06	8.06569e+06	1.34343e+07
M145T76	145.014	75.8	1.3	1.00261e+06	1.12168e+06	1.05269e+06	1.10451e+06	1.07378e+06	1.10787e+06	1.30267e+06	1.28664e+06	1.12753e+06	940235	1.07726e+06	1.01425e+06	1.05649e+06	1.02961e+06	1.12589e+06	1.25081e+06	1.02355e+06	1.04058e+06	1.1728e+06	1.02005e+06	1.04922e+06	1.16281e+06	1.17445e+06	994057	1.00312e+06	1.00543e+06	954946	1.00537e+06	852836	1.05537e+06	1.00574e+06
M145T768	144.992	767.8	12.8	5.52961e+06	7.63725e+06	3.32656e+06	6.24906e+06	2.22244e+06	2.55076e+06	1.89735e+06	2.53361e+06	269397	2.91938e+06	17553.5	199776	7.00346e+06	1.37153e+06	2.18762e+06	5.75936e+06	1.0985e+07	7.441e+07	3.14472e+07	2.51474e+06	7.79056e+06	932643	2.57786e+07	5.11911e+06	6.88469e+06	5.84909e+06	5.89674e+06	6.28736e+06	4.60613e+06	6.3945e+06	4.37856e+06
M145T785	144.992	785.1	13.1	3.49499e+07	4.33917e+06	3.14783e+07	288078	3.36503e+07	1.74951e+07	1.74405e+07	3.08948e+07	3.91063e+07	223186	3.65182e+07	7.34668e+06	1.05275e+06	9.45479e+06	606870	799724	9.34994e+06	1.90309e+06	1.8332e+06	559130	1.51595e+06	1.42142e+07	245660	345571	9.83169e+06	9.7995e+06	1.23337e+07	9.11926e+06	7.99472e+06	9.8061e+06	9.18096e+06
M145T84	145.098	84	1.4	7.02481e+06	6.58071e+06	6.98968e+06	9.10547e+06	7.17702e+06	6.81833e+06	8.473e+06	5.8944e+06	8.29307e+06	7.89921e+06	7.70763e+06	6.66492e+06	1.07951e+07	8.40048e+06	9.44806e+06	6.79416e+06	7.16278e+06	9.33886e+06	6.0104e+06	8.32265e+06	6.41854e+06	9.6246e+06	1.1655e+07	6.45305e+06	7.49842e+06	7.48246e+06	7.8761e+06	5.67137e+06	7.89e+06	7.7889e+06	7.83683e+06
M145T87	145.062	87	1.4	6.32279e+08	2.82197e+08	6.83146e+09	3.31205e+08	1.79029e+08	3.75987e+08	5.84157e+09	1.00346e+10	5.57094e+08	8.67976e+08	5.72998e+08	2.60486e+09	6.46855e+08	5.55594e+08	2.4645e+09	5.10074e+08	1.14703e+10	6.04168e+08	8.08015e+08	2.74836e+08	6.0848e+08	4.91999e+08	5.31016e+08	8.54373e+08	4.45447e+08	4.44915e+08	3.46004e+08	4.68157e+08	5.11809e+08	4.43122e+08	4.6898e+08
M145T96	145.014	96.3	1.6	1.87917e+06	1.88615e+06	1.47104e+06	2.08412e+06	1.93502e+06	1.72991e+06	1.53506e+06	1.74901e+06	615228	574043	512674	620941	483410	850154	690671	649558	3.0325e+06	741789	3.74994e+06	1.90059e+06	2.48565e+06	793161	993761	704619	1.3227e+06	1.36937e+06	1.39155e+06	1.39174e+06	1.39139e+06	1.37919e+06	1.39174e+06
M146T103	146.054	102.6	1.7	2.18108e+06	1.29653e+06	3.46173e+06	1.17643e+06	3.63931e+06	2.72957e+06	7.09655e+06	4.58641e+06	8.4474e+06	9.76749e+06	1.03304e+07	5.65805e+06	524515	4.46819e+06	1.99677e+06	2.10275e+06	2.12671e+06	522013	3.21713e+06	6.98652e+06	4.57235e+06	7.31099e+06	5.69835e+06	688326	3.75409e+06	3.64248e+06	3.91595e+06	3.75422e+06	3.75329e+06	3.70833e+06	3.57698e+06
M146T109	146.054	109.4	1.8	674217	328557	376555	309758	374417	243200	335270	1.03044e+06	1.45516e+06	2.83218e+06	2.36544e+06	2.72192e+06	2.42266e+06	2.66894e+06	3.3697e+06	4.62258e+06	1.58146e+06	2.53979e+06	1.20344e+06	845271	1.68849e+06	1.56151e+06	1.32792e+06	1.86715e+06	1.51692e+06	1.71663e+06	1.6888e+06	1.66008e+06	1.77854e+06	1.65361e+06	1.64835e+06
M146T126	146.046	125.7	2.1	73571.9	147806	117371	161582	349962	59710.8	96919.6	127398	116480	313522	135018	158265	227751	276003	196334	212151	142123	241848	168095	126959	205502	130265	148623	408039	158270	154136	143617	154169	167313	154251	158506
M146T224	146.061	223.8	3.7	71684	79883.8	8330.93	49640.3	174441	149827	71781.1	64435.2	76981.3	75392.1	69097.1	118475	87572.3	54255.7	67822.7	45172.9	32630.7	31486.6	51636.2	76586.2	46321.3	64898.6	61583.8	28999.6	70910.5	71055.9	68506.8	69518.8	70979.4	51003.2	68211.6
M146T32	145.914	31.5	0.5	205223	461314	118850	488019	171256	183985	164701	252294	263329	224700	396801	271284	264413	137787	172833	194401	164679	365434	268256	121192	157873	168223	370687	260004	215223	214616	212241	218050	212132	215228	209896
M146T37	145.931	36.9	0.6	108058	130428	152278	252117	130567	177577	97932.7	161195	258349	602873	368242	159831	336843	268146	239668	240291	174321	126482	83109.8	319266	91224.1	214768	241423	504485	300243	301655	285731	298162	301638	311110	295332
M146T374	146.046	374.2	6.2	67163	81336.4	47051.8	118852	90116.4	72777	77379.1	80337.8	66547.6	33719.8	71576.9	31852.7	73115.6	61865.9	76126.8	79190.6	59586.4	38530	137086	79932.8	46059.9	102752	93769.7	132344	95486.5	98720.1	96991.1	99985.1	98939.8	76429.1	98766.7
M146T80	146.046	80.4	1.3	7.29497e+08	6.32956e+08	7.56476e+08	6.58084e+08	7.0379e+08	6.2898e+08	8.46722e+08	7.75502e+08	7.55738e+08	8.32038e+08	8.00736e+08	7.34341e+08	6.47382e+08	8.75658e+08	8.1796e+08	8.94495e+08	7.94712e+08	6.55699e+08	8.15018e+08	7.76649e+08	8.57904e+08	7.93091e+08	7.48736e+08	7.59178e+08	7.26463e+08	7.23762e+08	7.23904e+08	7.24939e+08	7.31742e+08	7.23758e+08	7.10989e+08
M146T87	146.065	87	1.4	2.83497e+07	6.81248e+07	3.15736e+07	3.21018e+07	2.82477e+07	2.18029e+07	2.83742e+07	5.05125e+07	1.23709e+07	1.93637e+07	1.2083e+07	1.25802e+07	5.52499e+06	1.94844e+07	1.14481e+07	9.81145e+06	5.68172e+07	9.75492e+06	2.78468e+07	2.79012e+07	4.84734e+07	1.6479e+07	1.45893e+07	2.60939e+07	2.5828e+07	2.5944e+07	2.59436e+07	2.5104e+07	2.73505e+07	2.57425e+07	2.57452e+07
M146T89	146.082	89.5	1.5	3.49209e+07	4.29305e+07	2.91463e+07	2.94123e+07	2.86586e+07	3.14273e+07	3.29514e+07	3.33359e+07	3.32454e+07	2.82074e+07	3.17669e+07	3.26616e+07	3.27074e+07	2.59431e+07	4.07188e+07	3.20213e+07	3.16457e+07	3.35851e+07	3.7159e+07	3.78327e+07	3.14176e+07	3.73606e+07	3.11137e+07	3.42458e+07	3.0475e+07	3.19685e+07	3.06911e+07	3.36558e+07	3.10063e+07	3.1204e+07	3.79799e+07
M147T104_1	146.908	104.1	1.7	383592	583376	200621	588781	236581	156418	181224	365749	314865	412140	378130	112751	209535	329889	472711	117496	281496	258034	647364	192010	162519	512405	416618	403988	255990	239274	228557	239681	257720	256625	256515
M147T104_2	146.961	104.3	1.7	696797	149611	1.03477e+06	785207	124897	169435	860201	960354	2.99937e+06	4.49431e+06	3.73107e+06	2.39117e+06	2.39574e+06	4.29078e+06	3.86457e+06	3.22156e+06	839199	2.60043e+06	1.35267e+06	1.14097e+06	1.2407e+06	2.3095e+06	2.05316e+06	2.4978e+06	1.81075e+06	1.81058e+06	1.87812e+06	1.76388e+06	1.84728e+06	1.8315e+06	1.81135e+06
M147T104_3	147.066	103.8	1.7	6.73382e+06	5.59506e+06	6.63767e+06	6.91787e+06	7.1067e+06	5.28109e+06	6.37357e+06	6.09498e+06	5.4952e+06	6.67431e+06	6.41359e+06	6.06633e+06	3.21487e+06	6.15807e+06	5.0977e+06	5.23e+06	5.03233e+06	4.0175e+06	7.10533e+06	8.02928e+06	6.55027e+06	7.06674e+06	5.99859e+06	7.67878e+06	5.58539e+06	5.58593e+06	5.58531e+06	5.626e+06	5.78083e+06	5.4961e+06	5.73494e+06
M147T116	146.939	116.1	1.9	1.40905e+07	1.36547e+07	1.20414e+07	9.96911e+06	1.24185e+07	6.71233e+06	1.44291e+07	8.8641e+06	5.57813e+06	1.00831e+07	7.42832e+06	7.80582e+06	1.15675e+07	8.5989e+06	5.7608e+06	7.07144e+06	7.22948e+06	1.16866e+07	8.70347e+06	6.72533e+06	1.25898e+07	1.10842e+07	7.22889e+06	8.0186e+06	7.40219e+06	7.69899e+06	7.39564e+06	9.84484e+06	7.38234e+06	7.38212e+06	7.40068e+06
M147T120	147.066	119.8	2	708135	518333	592488	603115	675867	534615	763041	865627	359524	731459	629839	724653	650037	394895	765122	748055	457086	574147	636220	398208	396790	478896	687863	542709	590952	621529	615048	623538	621416	615041	612246
M147T129	146.939	128.9	2.1	1.55195e+07	3.68427e+06	2.64534e+07	964605	2.94309e+07	285389	2.88445e+07	124287	1.6333e+06	1.90798e+07	876242	1.66928e+07	2.3161e+07	408200	1.02652e+07	158305	4.18516e+06	7.83132e+06	820907	6.99367e+06	1.85364e+06	5.45975e+06	559240	3.8492e+06	1.50778e+07	1.2352e+07	1.23369e+07	1.34303e+07	1.37394e+07	1.22955e+07	9.47386e+06
M147T285	147.045	285.5	4.8	8.38972e+06	8.81173e+06	5.62157e+06	8.33772e+06	5.98208e+06	8.57533e+06	7.88501e+06	7.51941e+06	1.22726e+07	7.80431e+06	6.67217e+06	6.67809e+06	2.4686e+06	8.86762e+06	7.99805e+06	9.05475e+06	7.64541e+06	6.02296e+06	1.48287e+07	1.35539e+07	8.68122e+06	7.77373e+06	1.48955e+07	9.73316e+06	6.3563e+06	8.87083e+06	9.24411e+06	9.24638e+06	8.87339e+06	9.22746e+06	9.2222e+06
M147T303	147.045	303.4	5.1	3.7476e+06	3.80012e+06	8.27779e+06	1.65583e+07	9.19488e+06	6.46523e+06	1.39821e+07	8.04696e+06	1.06195e+07	3.01523e+07	1.432e+07	1.14275e+07	1.69087e+07	1.13831e+07	1.2507e+07	1.41073e+07	1.02969e+07	1.61811e+07	1.57298e+07	1.29796e+07	1.06292e+07	1.29025e+07	9.94033e+06	1.82646e+07	9.84728e+06	9.14803e+06	8.23562e+06	9.13054e+06	9.83433e+06	1.38857e+07	9.80566e+06
M147T37	146.939	37.2	0.6	6.14582e+06	4.68977e+06	7.97701e+06	6.50038e+06	5.78419e+06	4.69087e+06	9.26005e+06	6.43187e+06	314680	208962	293315	194254	288277	312028	254133	255043	387983	328160	534536	269926	376474	90321.7	285983	355380	2.5024e+06	2.35905e+06	2.40015e+06	2.40022e+06	2.40022e+06	2.28934e+06	2.38296e+06
M147T429	146.959	428.7	7.1	710453	840226	857395	1.06189e+06	559286	1.87725e+06	1.06015e+06	811367	1.14208e+06	590207	837804	1.15014e+06	854838	827534	928733	727375	599735	669992	1.1669e+06	857080	424795	1.12494e+06	1.43324e+06	525185	816904	898747	870237	898846	703439	898099	898901
M147T52	146.939	52.2	0.9	8.74759e+06	4.96782e+07	9.93127e+06	3.75928e+07	3.48843e+07	1.24452e+07	8.75229e+06	3.6902e+07	1.8019e+07	3.81521e+07	3.93894e+07	3.99467e+07	1.29276e+07	3.28218e+07	3.85994e+07	4.87644e+07	4.23283e+07	5.27276e+07	2.47743e+07	3.53022e+07	3.44311e+07	4.48548e+07	1.28955e+07	4.03909e+07	3.20428e+07	3.19095e+07	2.68511e+07	2.96413e+07	2.05182e+07	3.18239e+07	3.18937e+07
M147T55	146.923	55	0.9	5.06645e+06	7.48287e+06	5.71098e+06	6.80273e+06	2.86003e+06	1.01387e+07	5.4659e+06	4.38389e+06	1.17861e+07	7.31651e+06	9.25672e+06	6.63217e+06	6.67261e+06	6.54282e+06	9.85061e+06	7.16587e+06	5.53393e+06	1.37551e+07	7.99794e+06	7.04121e+06	6.41496e+06	6.87468e+06	9.54558e+06	5.55316e+06	8.18007e+06	7.57476e+06	7.30019e+06	6.21996e+06	7.21334e+06	6.74095e+06	6.60168e+06
M147T672	146.988	672.3	11.2	1.883e+06	6.77586e+06	374420	198824	181247	422610	720911	669727	46111.2	3.12643e+06	36360.8	100162	4.49027e+06	94292.2	395301	458170	60084.7	10084.9	1.86736e+06	4.19882e+06	41239.4	28995.8	37295.5	164330	1.03597e+06	1.14997e+06	1.23084e+06	1.1496e+06	1.14912e+06	1.11874e+06	1.14973e+06
M147T70	146.938	69.6	1.2	1.81035e+06	1.36113e+06	1.77439e+06	1.19195e+06	1.95958e+06	1.58963e+06	1.81894e+06	1.5595e+06	1.96368e+06	2.06237e+06	2.17925e+06	2.2695e+06	2.02591e+06	1.57842e+06	1.61086e+06	1.97346e+06	1.69448e+06	1.42902e+06	1.90925e+06	1.93889e+06	1.79133e+06	1.72932e+06	1.55419e+06	1.92315e+06	1.87754e+06	1.7299e+06	1.82722e+06	1.80085e+06	1.87368e+06	1.80046e+06	1.81459e+06
M147T732	146.994	732.4	12.2	5.3898e+06	4.85291e+06	7.09604e+06	4.88296e+06	2.77269e+06	5.24812e+06	6.72475e+06	5.96245e+06	3.71322e+06	6.52612e+06	4.2098e+06	3.45454e+06	2.72026e+06	1.03192e+07	2.52714e+06	3.63536e+06	6.29858e+06	672118	7.16968e+06	7.58547e+06	1.07731e+07	3.31746e+06	4.19303e+06	5.20792e+06	3.74731e+06	3.73978e+06	5.15111e+06	3.73369e+06	3.96596e+06	2.52207e+06	3.96869e+06
M147T765	146.994	765.4	12.8	1.35948e+06	3.15717e+06	6.05692e+06	2.9099e+06	3.91364e+06	2.57239e+06	4.05995e+06	1.90778e+06	2.88868e+06	2.85516e+06	3.3185e+06	3.01137e+06	2.70979e+06	4.41153e+06	3.69095e+06	3.98515e+06	3.25283e+06	3.81321e+06	3.59164e+06	2.66616e+06	4.5108e+06	4.80117e+06	2.61998e+06	3.00085e+06	1.56681e+06	3.24893e+06	3.24056e+06	3.51715e+06	3.50669e+06	3.5109e+06	3.46519e+06
M147T773	146.994	773.2	12.9	497326	764345	567636	362726	706522	298312	707043	233670	587308	395649	654475	681644	321778	312277	326144	334760	1.75409e+06	444554	1.60269e+06	1.00876e+06	1.16887e+06	595518	966883	1.00438e+06	517418	825045	678202	679099	386799	681589	613801
M147T80	147.049	80.4	1.3	6.74056e+07	5.92617e+07	3.74431e+07	6.51711e+07	1.39682e+07	4.69273e+07	2.38927e+07	5.31574e+07	3.72838e+07	6.48409e+07	4.63956e+07	5.92984e+07	2.04678e+07	1.73533e+07	5.18356e+07	1.74036e+07	4.9787e+07	4.93e+07	3.41811e+07	5.34596e+07	5.24212e+07	5.41108e+07	8.76144e+07	2.07324e+07	3.76723e+07	3.68164e+07	3.8251e+07	4.40157e+07	4.71285e+07	3.66485e+07	4.36294e+07
M147T84	146.983	84.1	1.4	6.17964e+06	378555	7.37715e+06	672776	2.74362e+06	3.35648e+06	465468	243188	1.08145e+07	1.21848e+07	1.46955e+07	1.29084e+07	1.39908e+07	1.48157e+07	1.42006e+07	8.93761e+06	6.92442e+06	1.60012e+07	668730	7.35494e+06	1.13143e+06	3.43103e+07	2.57425e+07	4.75025e+07	1.5398e+07	1.29543e+07	1.40062e+07	1.40329e+07	1.28918e+07	9.73491e+06	1.28273e+07
M147T96	147.066	95.6	1.6	3.3789e+07	2.74325e+07	2.9219e+07	3.90377e+07	3.94553e+07	1.2654e+07	2.53508e+07	3.25709e+07	7.13504e+06	6.17326e+06	1.05572e+07	7.00858e+06	2.88489e+06	9.29479e+06	5.96363e+06	5.62739e+06	1.75806e+07	2.75114e+06	2.25239e+07	3.62837e+07	1.69871e+07	7.6806e+06	7.43406e+06	9.01128e+06	1.64376e+07	1.67442e+07	1.49741e+07	1.54829e+07	7.14525e+06	1.42236e+07	1.43197e+07
M147T99	147.03	98.8	1.6	8.76819e+06	805841	1.77158e+06	9.44864e+06	9.19842e+06	1.09807e+07	1.63276e+06	1.19718e+07	1.11681e+07	1.50336e+07	6.8276e+06	1.08783e+07	1.54372e+07	1.72764e+07	1.73606e+07	1.44976e+07	1.7998e+07	2.20177e+07	1.65487e+07	9.3736e+06	1.90155e+07	1.5037e+07	1.14533e+07	1.75522e+07	1.36455e+07	1.25581e+07	1.34168e+07	1.4464e+07	1.36492e+07	1.42635e+07	1.3254e+07
M148T122	148.044	121.7	2	2.86309e+07	4.59056e+07	6.55969e+07	3.77078e+07	5.28342e+07	3.77227e+07	7.40765e+07	4.10482e+07	3.27195e+07	3.43201e+07	4.3655e+07	8.48986e+07	3.67729e+07	6.67088e+07	7.91608e+07	7.4069e+07	4.29755e+07	3.26378e+07	6.2931e+07	3.09977e+07	4.36644e+07	8.27706e+07	6.78854e+07	6.58869e+07	4.63499e+07	4.84169e+07	4.32536e+07	4.63163e+07	2.25717e+07	4.60851e+07	4.33593e+07
M148T285	148.049	284.9	4.7	627302	597444	625098	399449	569995	295812	661388	483678	1.19905e+06	1.58159e+06	1.49426e+06	1.35317e+06	1.11232e+06	2.0756e+06	1.53379e+06	1.3734e+06	595235	1.22825e+06	818570	958079	960670	683061	874829	1.11341e+06	812864	814065	799449	787020	392512	788748	814390
M148T37	147.94	37.3	0.6	243471	244024	190019	226328	217927	207628	295674	260566	222541	183929	198924	200018	214508	214695	181129	232417	225405	240184	232374	183095	216489	234766	215579	199568	197879	216975	191656	191412	174277	195381	214679
M148T381	148.063	380.8	6.3	8393.93	68422.2	10726.7	71771.8	15152.1	85202.8	15860.9	12700.2	80279.3	78412.9	61602.7	21939.6	83848.9	76376.1	64495.4	86650	17113.9	70370.5	79115.6	11675.2	68989.7	65904.1	107732	90693.3	63456.8	69639.2	57233.5	60873.7	78262.4	59164.5	60182.3
M148T457	148.05	456.6	7.6	9579.57	1.03285e+06	22007.4	13793.1	735454	508705	31246.5	627201	733403	26040.3	51684.6	180642	60166.5	25403.5	53212	36891.5	760228	15846.8	302326	342044	348653	16118.3	37679.5	24109.3	129258	262393	253180	255373	263758	246119	263289
M148T480	148.05	480.3	8	749220	420317	793600	696924	541046	191170	857556	1.03803e+06	47661.8	192116	183368	136180	285972	156944	188771	242058	332212	845815	777216	39122.7	349344	73466.8	102175	566054	368801	429289	472848	400718	691450	464667	474698
M148T58	147.942	57.6	1	314210	361010	333035	340103	332727	318207	333312	328013	350035	332593	317651	318628	327172	348308	343353	333181	378626	311764	400379	374126	339595	363293	347735	333292	337129	342474	337240	350892	352856	342738	328655
M148T80	148.05	80.4	1.3	4.21187e+06	1.81823e+07	1.55889e+07	1.54789e+07	1.40491e+07	2.40191e+07	1.37557e+07	4.38267e+06	3.18569e+06	1.26159e+07	1.33992e+07	3.76875e+06	1.25892e+07	4.27336e+06	1.35401e+07	3.43241e+06	1.1115e+07	9.12385e+06	2.73747e+06	1.87149e+07	1.16829e+07	1.80136e+07	3.50064e+06	1.57553e+07	4.80539e+06	5.85075e+06	4.99719e+06	4.83319e+06	8.43519e+06	4.97788e+06	5.23758e+06
M148T96	148.07	95.6	1.6	562419	673263	664827	629178	855648	1.00801e+06	926604	321188	1.7901e+06	552569	693415	518874	688428	466933	1.08526e+06	654069	428049	681443	602892	807855	372870	1.03414e+06	864355	299986	921156	859031	879131	781389	741468	883420	841140
M148T99	148.033	99.5	1.7	447863	800306	313703	732752	475079	243232	202386	216421	534598	196682	336927	351268	739991	98006.1	420476	340940	492645	807581	659986	293539	162346	420345	876468	513260	556730	591768	558596	582770	595918	304917	581243
M149T104_1	148.907	103.9	1.7	109499	113303	118294	96711.2	93623.4	112319	118970	130813	119135	88011	95338.7	81984	89089.7	80337.9	106263	126033	108346	102811	145299	101331	83081.2	113562	147334	87905.6	109801	105696	81753.5	107328	116252	109960	91405.3
M149T104_2	149.011	104.2	1.7	177994	176215	141800	158175	124981	91940.9	41564	97905.2	56864.6	16093.5	61650.2	67538.9	13448.8	14029.6	56338.7	30695.6	181811	13017.7	197733	138693	110087	18110.4	58168.2	14966.4	85328.5	85914.5	99515.5	85774.7	72866.6	41514.8	79411.5
M149T37	148.942	36.9	0.6	146308	105456	166501	117322	31204	20103.7	44928.8	45971.7	141606	39970.8	38304.8	116754	34132	35257.3	12371.2	147673	24972.2	29878.6	17381.9	24507	35563.4	34408.5	28265.2	38719	108243	108141	69188.5	108273	89665.1	108513	87971.3
M149T399	149.097	399.3	6.7	140314	185116	297022	190356	324531	159794	209005	186078	203675	279752	361540	283381	240915	236630	170779	217833	327641	211972	299863	368028	240234	360770	93188.2	352429	167110	240580	240480	238160	240425	241205	231458
M149T56	148.941	56.1	0.9	334310	480540	366453	330576	402118	417820	290568	381696	391737	338496	394010	404766	356025	350359	584114	453781	409410	575482	413097	455032	360980	416965	443597	241583	413037	413370	413141	450509	413886	424844	464735
M149T57	148.955	56.7	0.9	260232	349791	306006	112900	290643	251537	333730	303197	336230	293504	401370	293280	327633	313289	262116	283336	348743	449522	421953	327058	404093	307467	286398	386579	288067	295111	296321	280028	291886	127506	284851
M149T617	149.061	617.4	10.3	921332	1.21905e+06	968640	1.52188e+06	924023	707562	655029	1.1574e+06	585742	680914	189410	695329	261946	526218	633845	338974	959988	335346	322883	403399	700187	274607	637828	735955	809669	816210	873278	848624	627283	813725	874693
M149T82	149.046	81.7	1.4	1.73118e+06	1.99737e+06	1.8073e+06	1.95096e+06	1.85502e+06	1.95863e+06	2.31514e+06	2.27081e+06	1.99816e+06	1.83832e+06	1.83123e+06	1.86785e+06	1.8928e+06	1.84441e+06	1.96999e+06	2.16026e+06	1.84513e+06	1.78168e+06	2.07578e+06	1.85053e+06	1.78371e+06	2.08474e+06	2.12979e+06	1.74017e+06	1.78149e+06	1.75507e+06	1.78184e+06	1.76873e+06	1.46232e+06	1.75327e+06	1.73488e+06
M149T93	149.046	93.4	1.6	2.96179e+06	2.04726e+06	3.25201e+06	1.87558e+06	2.33883e+06	2.76732e+06	2.09309e+06	3.4651e+06	2.34882e+06	1.60661e+06	1.81246e+06	2.90254e+06	5.93231e+06	1.98299e+06	4.57868e+06	7.9936e+06	1.67301e+06	6.71643e+06	2.01605e+06	502228	1.49851e+06	1.92776e+06	2.08918e+06	3.05086e+06	4.0346e+06	5.6958e+06	5.69093e+06	6.05548e+06	5.92221e+06	6.00652e+06	5.71409e+06
M150T104	150.003	104.2	1.7	156356	40604.3	86802.3	42353.6	74629	46760.5	240748	13651.2	155760	187435	148499	119726	236160	120186	154647	489806	58780.1	81138.5	25648.9	28789.2	27982	145186	120986	119238	109448	96677.5	90717.8	59028.3	53017	118372	101943
M150T122_1	150.023	121.6	2	2.44482e+06	3.92823e+06	2.05353e+06	4.33378e+06	1.91596e+06	1.88204e+06	1.95511e+06	1.97514e+06	104517	522362	120966	495221	41604.9	764087	71736.3	104147	3.16722e+06	32139.7	2.73104e+06	2.49617e+06	2.33996e+06	616737	515506	1.07648e+06	1.69096e+06	1.75846e+06	1.67288e+06	1.67198e+06	2.00564e+06	1.66965e+06	1.6775e+06
M150T122_2	150.04	121.6	2	1.73051e+06	3.6567e+06	2.13989e+06	4.25147e+06	1.91195e+06	1.72206e+06	2.52151e+06	1.78901e+06	302020	428627	349109	403696	116802	594719	201168	250085	2.96191e+06	92855.3	3.1091e+06	2.29315e+06	2.098e+06	571066	442340	813154	1.54791e+06	1.69121e+06	1.71037e+06	1.59682e+06	1.95409e+06	1.70509e+06	1.59201e+06
M150T176	150.042	175.6	2.9	374427	256534	261885	351718	189402	195965	273648	301554	187784	288251	245898	211085	350546	287781	294877	249960	425813	463847	459189	341327	392348	343271	334669	458700	316206	316047	273561	322320	322317	322210	316192
M150T269	150.041	268.7	4.5	118976	402903	316195	378877	378989	690360	96657.8	367244	468344	385415	325690	263514	344997	104506	117606	385321	315057	261833	94255.6	294821	507595	95499.8	406983	65414.9	182464	309240	125388	310316	312832	287746	315664
M150T334	150.056	333.7	5.6	99118.1	48467.2	115430	26966.7	84854.7	75000.2	225751	214248	85410.4	35417.4	146163	50834	26240.1	135505	174228	153616	84774.2	33288.6	18273.1	69925.7	201810	65706.9	32122.5	190239	75667.2	82554.7	84514.8	101406	45353.6	100430	93361.9
M150T617	150.064	617.3	10.3	53015.8	22978.5	39575.7	25598.3	45032.2	76748	26291.7	25475.2	128242	59516.7	67516.2	67572.8	40145.2	65519.7	99183.6	111038	39922.9	49989.8	34524.9	11949.6	32403.8	50591.4	110301	60392.3	64338.9	61340.8	64380.2	64460	40985.1	38397.9	64465.2
M150T620	150.002	619.8	10.3	3.42337e+06	6.43143e+06	1.12922e+07	3.58209e+06	6.08381e+06	5.9169e+06	5.90797e+06	5.77123e+06	1.02461e+07	3.54588e+06	1.13922e+07	1.46901e+07	7.19634e+06	7.05992e+06	3.93362e+06	7.52995e+06	7.91069e+06	6.77253e+06	4.35194e+06	4.24861e+06	5.69141e+06	6.35139e+06	2.58487e+06	9.56341e+06	6.77774e+06	6.45474e+06	6.46903e+06	5.13084e+06	5.28716e+06	5.98439e+06	6.48579e+06
M150T69	150.023	68.6	1.1	766656	495684	614392	664943	1.22e+06	786576	874928	992091	884273	1.05085e+06	499484	601189	432973	665304	1.12433e+06	1.06062e+06	1.69037e+06	683439	754236	704137	1.0789e+06	1.16779e+06	1.34958e+06	1.09682e+06	907060	994347	960920	851503	1.04511e+06	955676	789421
M150T90	149.987	90.3	1.5	9.59044e+06	1.1253e+07	1.01981e+07	1.02283e+07	1.08538e+07	9.77497e+06	9.4777e+06	1.16902e+07	1.79497e+07	1.27502e+07	1.4244e+07	1.55712e+07	1.75367e+07	1.19169e+07	2.29629e+07	1.752e+07	1.32941e+07	1.33386e+07	1.84863e+07	1.1533e+07	1.11429e+07	2.29346e+07	1.83883e+07	1.20407e+07	1.41281e+07	1.44619e+07	1.51138e+07	1.45088e+07	1.35929e+07	1.35858e+07	1.35714e+07
M151T114	151.061	114	1.9	560651	558386	509627	548761	523035	563126	235560	532827	484345	483767	419420	477563	431026	497725	504871	483230	481847	447803	507844	580502	394910	515631	543713	433213	518873	530936	542760	530952	516513	514564	514733
M151T151	151.026	151	2.5	1.84113e+08	9.78924e+07	1.50423e+08	1.3464e+08	1.49425e+08	1.67542e+08	2.08861e+08	7.84349e+07	8.09784e+07	7.73818e+07	1.67644e+08	4.65158e+07	1.72757e+08	1.62313e+08	1.50441e+08	1.7793e+08	1.37182e+08	1.67329e+08	1.66005e+08	1.72641e+08	1.50364e+08	1.88184e+08	2.55022e+08	1.78817e+08	1.51595e+08	1.27613e+08	1.0803e+08	1.53766e+08	1.53276e+08	1.45753e+08	1.52551e+08
M151T31	150.891	30.7	0.5	248191	477022	223129	489265	253589	307118	240034	236291	365296	276777	339482	308730	316621	287973	299602	315932	265536	379065	312782	239111	238224	256697	388364	327906	317882	318005	392699	316895	306973	310089	309814
M151T322	151.051	322.3	5.4	404841	242801	507581	372782	363739	630788	408374	333483	413832	208189	304998	146605	150652	240938	339749	142707	111908	93349	297990	1.23134e+06	71653.9	408641	49387	35589.5	456019	396931	434710	385321	380373	386037	379654
M151T370	150.999	370.2	6.2	377294	459665	292819	1.06866e+06	272060	748466	248927	748527	1.05127e+06	4.66894e+06	789334	461866	4.41257e+07	1.53477e+06	2.93276e+06	438482	981988	4.58363e+07	5.58525e+06	1.59872e+06	1.83007e+06	1.64738e+06	4.6991e+06	1.54268e+06	4.35403e+06	4.53454e+06	4.52699e+06	4.73361e+06	3.05372e+06	4.53542e+06	4.34321e+06
M151T433	150.999	432.8	7.2	6.29907e+06	4.06061e+06	6.05635e+06	7.17971e+06	5.62814e+06	4.81477e+06	6.73134e+06	8.00677e+06	9.81793e+06	3.28153e+06	1.10981e+07	7.5339e+06	3.6908e+06	3.83787e+06	1.53828e+06	5.38405e+06	1.28034e+06	7.96487e+06	4.40898e+06	1.89181e+06	9.28424e+06	1.38362e+07	5.18071e+06	1.39999e+06	3.95678e+06	3.58624e+06	3.91035e+06	3.57978e+06	2.41262e+06	3.06099e+06	2.37392e+06
M151T57	150.935	57.4	1	158852	99177	120437	94923.5	136414	76765	144164	100053	134692	103331	138715	106560	94047.5	105237	109011	153588	127857	131233	174568	146082	101470	157065	123010	148214	38115	102316	104172	109238	108513	102693	106303
M151T603	151.04	603.2	10.1	2.39336e+06	3.46131e+06	3.69165e+06	757190	3.83162e+06	2.22561e+06	3.5074e+06	2.93898e+06	3.92247e+06	1.25516e+06	6.68181e+06	1.82827e+06	1.99211e+06	3.15394e+06	1.27439e+06	1.34914e+06	3.31974e+06	2.16571e+06	1.34921e+06	4.55378e+06	3.32113e+06	5.41242e+06	1.70117e+06	4.98307e+06	3.35712e+06	3.51822e+06	3.34343e+06	3.34321e+06	1.86123e+06	3.55066e+06	3.33151e+06
M151T619	151.004	619.1	10.3	47056.3	273676	61540.1	664066	314436	262120	340484	318657	501853	317199	386194	453317	247209	47634.3	68484	54476.2	25264.6	162355	389486	308993	56775.5	68830.3	90331.8	418027	359015	442248	430140	416876	429982	479773	441893
M151T653	151.026	652.9	10.9	699172	1.28497e+06	1.19775e+06	375492	964917	1.45844e+06	1.01182e+06	538501	1.84313e+06	484518	1.98151e+06	547454	1.81413e+06	1.40177e+06	1.6171e+06	543258	1.65034e+06	505667	1.67465e+06	1.16583e+06	1.69332e+06	1.80871e+06	1.64974e+06	637252	1.39104e+06	1.03018e+06	1.40715e+06	1.32028e+06	1.39297e+06	1.5107e+06	1.11037e+06
M151T668	151.149	667.6	11.1	650367	66060.3	598619	46521.8	774390	267457	531068	369473	331864	444773	911179	523275	343845	110889	292683	157560	382879	566017	98244.3	126249	162408	772078	540928	564738	346104	263500	391550	295859	386542	535354	385960
M151T729	150.999	729.5	12.2	1.32597e+07	5.51715e+07	5.44511e+06	6.36202e+06	2.7328e+06	1.71335e+06	5.94776e+06	3.1257e+06	2.59141e+06	1.92462e+07	1.00593e+06	2.7798e+06	5.90173e+06	1.00167e+07	1.20804e+07	9.15766e+06	1.86656e+06	32279	3.40315e+07	6.28609e+07	5.07927e+06	4.25494e+06	70867.6	1.85911e+07	1.10966e+07	1.05798e+07	1.10964e+07	1.15918e+07	1.11287e+07	1.40893e+07	1.32653e+07
M151T759	150.999	759	12.7	3.52371e+07	3.72256e+07	1.82178e+07	4.12111e+07	1.39675e+07	2.83031e+07	2.07314e+07	1.4608e+07	3.01345e+07	2.48925e+07	3.86178e+07	1.85394e+07	2.41849e+07	1.51707e+07	1.26249e+07	2.5479e+07	1.61333e+07	1.97567e+07	1.39077e+07	4.18136e+07	9.88583e+06	1.84646e+07	2.98392e+07	3.68582e+07	1.52601e+07	2.10105e+07	2.10383e+07	2.09832e+07	1.74988e+07	2.01391e+07	2.18573e+07
M151T768	150.999	768.3	12.8	1.3342e+06	1.12155e+06	729975	1.44298e+06	174538	881492	1.33242e+06	2.04361e+06	621918	3.20472e+06	1.35989e+06	676866	176678	1.90341e+06	1.46482e+06	1.19752e+06	2.84113e+06	717937	1.51728e+06	1.3126e+06	1.37781e+06	2.31947e+06	1.62538e+06	2.42064e+06	1.25763e+06	1.25841e+06	1.25525e+06	1.28975e+06	1.19828e+06	938196	1.04407e+06
M151T815	150.999	814.8	13.6	1.32977e+07	7.59199e+06	1.35745e+07	1.65671e+07	1.37934e+07	5.1862e+06	6.00039e+06	5.46934e+06	1.66748e+07	2.74845e+07	2.07996e+07	7.68631e+06	1.12146e+07	2.46715e+07	2.5164e+07	1.01203e+07	2.33444e+07	7.12207e+06	2.57733e+07	2.38185e+07	7.69706e+06	6.65851e+06	1.61634e+07	8.96966e+06	1.23669e+07	1.10074e+07	1.09486e+07	1.19407e+07	1.2305e+07	1.09738e+07	1.09466e+07
M151T82	150.887	82.4	1.4	1.56671e+07	9.60424e+06	1.31356e+07	1.06187e+07	1.42571e+07	8.51104e+06	1.2833e+07	9.60375e+06	1.02401e+07	1.00529e+07	1.31164e+07	9.81043e+06	9.39161e+06	9.00173e+06	8.96675e+06	9.06621e+06	1.26698e+07	9.13033e+06	1.5317e+07	1.3188e+07	1.14983e+07	1.05903e+07	9.4752e+06	1.3355e+07	9.61222e+06	9.76338e+06	9.80493e+06	9.80577e+06	7.08508e+06	9.80221e+06	9.73194e+06
M151T84	151.013	84.2	1.4	4.69869e+06	5.57523e+06	5.04396e+06	2.65582e+06	4.64137e+06	4.75342e+06	5.54505e+06	4.7204e+06	4.43204e+06	4.50863e+06	4.806e+06	3.83348e+06	4.60165e+06	3.81572e+06	3.65606e+06	5.14671e+06	4.22454e+06	4.71939e+06	3.98143e+06	4.16695e+06	4.4228e+06	5.5957e+06	3.05305e+06	8.08921e+06	4.63481e+06	4.02145e+06	4.00671e+06	5.76971e+06	4.43375e+06	4.16862e+06	3.90232e+06
M151T91_2	151.061	90.6	1.5	1.31769e+07	3.94424e+07	1.12537e+07	1.29244e+07	6.92066e+06	1.25316e+07	7.74081e+06	1.46395e+07	8.02568e+06	1.0252e+07	3.73497e+07	3.65405e+07	3.17778e+07	2.13208e+07	3.24725e+07	3.58058e+07	1.74711e+07	4.42371e+07	1.10472e+07	4.0064e+07	1.86365e+07	1.25308e+07	1.25332e+07	1.72564e+07	1.63607e+07	1.67279e+07	2.00874e+07	2.43988e+07	2.0747e+07	1.0425e+07	1.68014e+07
M152T122	152.029	121.7	2	2.11884e+07	1.80997e+07	2.28107e+07	2.37446e+07	2.12585e+07	1.92957e+07	2.21843e+07	2.49611e+07	4.58647e+07	5.48144e+07	5.93955e+07	5.31069e+07	5.35677e+07	4.97908e+07	5.19058e+07	6.59081e+07	2.72089e+07	5.06899e+07	2.61828e+07	2.80666e+07	2.76364e+07	4.74585e+07	3.6402e+07	4.81852e+07	4.10484e+07	4.10928e+07	4.32042e+07	4.31409e+07	4.92503e+07	4.27436e+07	4.10625e+07
M152T151	152.029	151	2.5	1.07643e+07	1.441e+06	8.10545e+06	1.14075e+07	1.19113e+07	1.23161e+07	1.05576e+07	1.07275e+07	1.10921e+07	7.4318e+06	1.11137e+07	8.03653e+06	9.897e+06	7.40869e+06	8.12654e+06	9.11385e+06	9.4516e+06	7.55732e+06	9.28546e+06	1.16065e+07	1.15596e+07	1.20178e+07	1.33046e+07	1.13999e+07	8.25378e+06	9.21913e+06	8.38768e+06	8.25e+06	8.25462e+06	8.63212e+06	8.32841e+06
M152T31	151.89	30.8	0.5	18203.9	20799	15848.3	23182.3	16568.7	13637.9	17259.1	10028.7	60781.8	35762.7	30931.5	60644.4	62248.8	28002.5	44780.6	30170	54773	51651.8	28932.5	23400.2	17861.8	35894.3	34956.8	44590.1	26900.6	24288.7	32159.4	29742.4	32520.5	29609.6	31357.6
M152T523	152.044	522.7	8.7	422439	20619.6	417212	11200	744170	361653	423443	279769	977501	787604	1.62722e+06	583180	208140	756673	332761	332269	319505	45434.5	157389	92450.2	249238	476742	29672.6	451353	491641	381389	315345	400404	443633	381492	382913
M152T603	152.044	603.3	10.1	691699	2.02029e+06	448178	169150	219690	121533	152017	233013	363347	1.7156e+06	411981	609686	215915	420933	1.08038e+06	684428	219669	255245	1.7504e+06	2.00081e+06	375072	834426	292435	391688	534547	488208	545112	528965	730971	327432	491009
M152T619	151.998	619.3	10.3	346189	518361	324986	902317	306939	393656	355092	664173	293549	209992	387386	349793	220421	108619	249462	249041	318469	239376	383467	302835	402625	232385	288216	297900	336041	289479	288917	299825	288130	245465	300606
M152T676	152.035	675.7	11.3	231973	302228	210590	685826	159537	450866	133462	322896	1.24112e+06	1.36868e+06	632166	1.07951e+06	323302	971292	935040	1.10169e+06	622619	407649	233232	110759	213028	1.31696e+06	1.35812e+06	1.02203e+06	682199	704556	917832	919302	854269	922430	913953
M152T698	152.035	697.9	11.6	3.1087e+06	3.43884e+06	1.5994e+06	3.11474e+06	3.36196e+06	2.52338e+06	2.39704e+06	2.45063e+06	2.74092e+06	2.65885e+06	1.96042e+06	3.11645e+06	2.52741e+06	2.48669e+06	2.49603e+06	2.31671e+06	3.74224e+06	1.78573e+06	2.32326e+06	2.63495e+06	1.68385e+06	2.83889e+06	2.91396e+06	1.54932e+06	2.61651e+06	1.73945e+06	2.67031e+06	2.74964e+06	2.75291e+06	2.74663e+06	2.75393e+06
M152T89	152.002	88.7	1.5	1.01469e+08	9.26421e+07	1.32262e+08	1.29631e+08	9.0409e+07	9.22644e+07	1.01805e+08	1.234e+08	1.24928e+08	9.31149e+07	8.6233e+07	8.45791e+07	1.14699e+08	9.02779e+07	9.31697e+07	1.14814e+08	1.09343e+08	9.34924e+07	1.26422e+08	1.30167e+08	1.10888e+08	1.14799e+08	9.49487e+07	1.12452e+08	9.40792e+07	9.93014e+07	9.64636e+07	9.40438e+07	8.96206e+07	1.02031e+08	9.39288e+07
M152T91_1	151.982	90.6	1.5	493526	556941	384279	469921	583431	341666	531064	413312	567950	505517	531428	510835	563293	445026	555026	560251	587830	622273	581804	612660	577542	545796	561929	573161	523750	540805	540824	514320	540773	574952	511344
M152T91_2	152.065	90.7	1.5	1.62023e+06	2.10538e+06	1.63181e+06	2.28713e+06	1.75417e+06	1.05492e+06	1.70831e+06	2.05129e+06	1.25434e+06	224140	1.26165e+06	1.10601e+06	1.27835e+06	1.13495e+06	1.16443e+06	242056	1.33184e+06	759341	1.52281e+06	2.11152e+06	1.36408e+06	1.04857e+06	924373	1.18614e+06	506406	560700	950915	951524	953467	885328	953385
M153T147	153.067	146.7	2.4	30543.4	125522	36447.2	75977.1	39846.1	62325.9	75628.8	99087.6	93671.8	39907.1	86611.3	38526.2	61532.5	94141.4	66157.9	38121.6	76859	66053.7	83124.6	102571	41190.3	33064.7	74128.9	90013.8	82869	53017.5	61730.8	77042	78517.4	77713.4	77938.1
M153T281	153.041	281.4	4.7	299552	425948	627588	191287	888224	382893	446403	365642	415903	228498	330741	609777	302765	250537	563232	367097	274392	257401	222542	241180	536031	288525	202134	324783	427480	303778	273421	333182	351013	336546	197340
M153T31	152.887	30.7	0.5	33083.4	40532.8	146874	41784.3	29361.6	29694.8	27702.9	29323.5	139121	239791	194400	40828.6	45625.2	162564	177361	164542	49981.8	145295	141013	131063	116228	126475	35600.8	42824.4	121309	121695	71213.6	113181	121741	122010	81835
M153T332	153.067	332.4	5.5	53466.1	41566.1	114117	69824.2	94163.8	17368.7	84334.4	19318.3	462707	2.75745e+06	463768	1.32451e+06	2.07135e+06	1.273e+06	1.61907e+06	1.91985e+06	109951	326286	1.88361e+06	189071	179742	971857	1.04182e+06	1.69688e+06	964548	1.35203e+06	962261	961496	965964	1.02381e+06	1.03103e+06
M153T355	153.021	355.5	5.9	1.90727e+06	1.58297e+06	3.22437e+06	2.16065e+06	2.32096e+06	1.35642e+06	1.88097e+06	1.8367e+06	1.25665e+06	324986	801366	283477	652803	280201	469793	1.02972e+06	2.08e+06	916994	2.65673e+06	2.30936e+06	1.87405e+06	1.05017e+06	2.01064e+06	771477	751800	959403	1.05364e+06	961065	679834	1.02593e+06	1.16907e+06
M153T567	153.092	566.7	9.4	213285	62791.3	241699	180565	115501	26878.1	277497	147731	68117.2	129000	179204	157061	85033.6	111536	64672	60058.6	230788	45681.8	205184	182638	180201	62319	104706	124928	129666	97004.1	128810	111655	128765	130263	63942
M153T69	152.986	69.3	1.2	2.49022e+06	3.98715e+06	2.17112e+06	3.07491e+06	2.36605e+06	2.53902e+06	2.58186e+06	2.32262e+06	1.31766e+06	4.61515e+06	1.95613e+06	6.00153e+06	2.64637e+06	977144	1.65817e+06	3.93005e+06	2.52326e+06	3.77854e+06	937554	2.40122e+06	1.10197e+06	1.32108e+06	4.00863e+06	829502	2.73449e+06	2.73687e+06	2.439e+06	2.6963e+06	2.80267e+06	2.40069e+06	2.43395e+06
M153T698	153.039	697.8	11.6	146388	53839.6	149386	130307	197023	97714.9	213101	162258	158957	140080	219310	78599.1	88236	99379.8	180958	56952.4	231538	142156	214685	153013	46768.2	202429	89178.2	116276	155815	155988	155592	73244.3	143752	157899	138167
M153T75	152.986	74.9	1.2	1.15312e+06	1.17868e+06	1.2396e+06	1.42104e+06	1.20543e+06	1.20737e+06	1.18801e+06	1.21651e+06	1.36595e+06	1.03751e+06	1.13586e+06	1.09934e+06	1.08636e+06	1.15001e+06	1.25866e+06	1.08753e+06	1.14236e+06	1.14576e+06	1.14499e+06	1.09183e+06	1.08612e+06	1.21456e+06	1.29991e+06	1.05306e+06	1.21602e+06	1.27925e+06	1.21616e+06	1.22785e+06	1.22204e+06	1.216e+06	1.21605e+06
M153T82	152.884	82.4	1.4	1.98714e+07	1.02464e+07	1.32801e+07	1.25951e+07	9.93391e+06	9.20041e+06	9.05837e+06	9.48267e+06	8.99562e+06	8.3841e+06	1.02751e+07	8.2215e+06	9.15417e+06	9.18345e+06	9.02989e+06	8.08038e+06	2.03599e+07	8.81005e+06	2.11275e+07	1.50338e+07	9.14246e+06	9.62953e+06	9.24171e+06	1.5632e+07	1.0974e+07	1.05071e+07	1.13165e+07	1.01025e+07	6.66459e+06	9.8315e+06	1.09725e+07
M153T89	153.006	88.7	1.5	2.51088e+06	2.94614e+06	3.43513e+06	2.97492e+06	2.52611e+06	2.58104e+06	3.47485e+06	2.4087e+06	2.58104e+06	3.20663e+06	2.36929e+06	3.83113e+06	2.26884e+06	9.38584e+06	3.01885e+06	3.28714e+06	2.5351e+06	1.86052e+06	2.56268e+06	2.97655e+06	1.92927e+06	2.16881e+06	5.33907e+06	1.72311e+06	2.67254e+06	2.67355e+06	2.67381e+06	3.67625e+06	3.30477e+06	2.66259e+06	2.64921e+06
M154T101	153.982	101.4	1.7	6.31891e+06	6.11733e+06	6.35821e+06	6.22926e+06	6.94001e+06	7.06244e+06	5.71819e+06	7.52096e+06	7.48159e+06	7.11047e+06	7.74223e+06	6.61589e+06	6.30621e+06	6.70285e+06	5.97483e+06	7.1173e+06	7.04773e+06	7.67354e+06	7.99442e+06	6.69108e+06	7.73233e+06	6.59898e+06	8.33215e+06	7.47948e+06	6.25762e+06	6.45139e+06	6.13331e+06	6.21755e+06	5.91125e+06	5.87252e+06	5.86249e+06
M154T108	154.06	108.1	1.8	1.42692e+06	580333	1.36227e+06	585276	2.41658e+06	2.08322e+06	287974	2.46452e+06	283465	1.4591e+06	697213	387755	2.1874e+06	800650	893117	1.58782e+06	1.08243e+06	484009	949683	1.66397e+06	540763	1.20313e+06	1.69212e+06	500512	758985	969941	730934	737491	760635	710400	1.04826e+06
M154T31	153.869	31.1	0.5	314572	330955	363620	354094	106220	106254	356317	250875	296134	281039	22913.6	374278	438947	290217	341107	91424.2	296534	85622.3	97395.1	105439	291403	103497	436815	101392	206590	299845	194384	240582	123202	210798	241515
M154T391	154.088	391	6.5	138814	135620	83889.3	120978	132414	21723.4	128588	155366	74338.4	77121.6	101430	115416	348224	73451.6	424322	341825	263381	462384	382355	207508	91642.4	64217.4	187964	40259.1	142766	184573	178442	184838	215224	178166	179194
M154T667	154.124	666.5	11.1	139795	315284	145147	389420	216309	349758	231601	509468	63852	237608	100231	70129.2	64591.9	88605.3	72544	89675.6	324692	70991.6	266183	223947	333204	87100.7	75888.6	100745	166227	158737	106478	176891	179721	176820	197016
M154T720	153.992	720.4	12	6.38552e+06	4.96634e+06	5.34832e+06	3.53211e+06	6.02373e+06	4.36062e+06	8.06199e+06	4.27709e+06	7.21633e+06	1.11107e+07	2.44477e+07	2.205e+07	1.162e+07	8.09909e+06	9.1408e+06	9.72713e+06	2.02522e+07	1.96102e+07	9.13448e+06	8.51408e+06	2.15834e+07	9.47758e+06	2.29342e+07	3.17987e+07	1.44222e+07	1.44238e+07	1.34629e+07	1.44303e+07	9.64083e+06	1.40612e+07	1.37469e+07
M154T733	153.992	732.7	12.2	4.67968e+07	9.26741e+07	2.19591e+07	1.60324e+07	1.13072e+07	1.00379e+07	3.2034e+07	1.23432e+07	1.17444e+07	4.94535e+07	1.1649e+07	6.69961e+06	4.13342e+07	2.82183e+07	8.4328e+06	2.66024e+07	1.09185e+07	3.0225e+06	3.86744e+07	8.29871e+07	4.8813e+06	7.27636e+06	3.30717e+06	1.24724e+07	2.47635e+07	2.47775e+07	2.25538e+07	1.7489e+07	2.49235e+07	2.35484e+07	3.15894e+07
M154T742	153.992	741.8	12.4	9.28393e+06	9.00577e+06	4.89409e+06	3.38046e+06	2.87301e+06	7.39243e+06	1.0567e+07	6.74721e+06	1.12261e+07	8.92348e+06	1.72605e+07	7.56154e+06	4.01651e+06	1.1799e+07	6.62827e+06	8.92584e+06	7.42537e+06	3.43461e+06	2.87803e+06	7.72438e+06	1.17708e+07	4.40701e+06	3.8474e+06	6.60885e+06	7.39615e+06	6.69182e+06	5.9686e+06	9.30071e+06	6.64251e+06	5.90941e+06	7.09279e+06
M154T750	153.992	750	12.5	3.1856e+07	1.84262e+07	2.5555e+07	1.27461e+07	2.71091e+07	1.51562e+07	3.13146e+07	1.97855e+07	3.72377e+07	5.26906e+07	4.94307e+07	5.39243e+07	2.72006e+07	2.92032e+07	4.65681e+07	2.83179e+07	2.69799e+07	2.04425e+07	2.44842e+07	4.25827e+07	1.78243e+07	3.77864e+07	2.21593e+07	5.6428e+07	2.48711e+07	2.15811e+07	3.06122e+07	2.32414e+07	3.21649e+07	2.62451e+07	2.78022e+07
M154T760	154.064	760	12.7	181710	135039	199387	216268	172305	193239	351248	295615	154144	194855	222225	196995	92052.1	256630	267598	290981	263844	487697	302548	328752	303961	292427	253762	368478	209378	204044	201119	112289	213079	200052	270841
M154T766	153.992	766.4	12.8	3.95886e+07	1.37683e+07	1.48346e+08	2.0807e+07	1.58507e+08	8.41551e+07	9.46907e+07	2.3217e+07	2.23341e+07	2.63573e+08	1.09547e+08	1.50368e+08	5.53612e+08	2.96905e+07	2.78825e+08	1.00273e+08	1.83687e+08	1.35197e+09	1.93883e+08	8.11575e+07	2.62928e+08	6.84155e+07	2.16796e+08	1.58355e+08	5.81247e+07	5.81576e+07	7.76441e+07	6.0642e+07	5.92027e+07	5.93656e+07	9.75551e+07
M154T783	153.992	783.4	13.1	4.58416e+07	2.98537e+06	1.34326e+07	1.4907e+07	4.46486e+07	2.05405e+06	5.94291e+07	1.96022e+07	8.33079e+07	7.52883e+07	1.13726e+08	4.98445e+07	5.48612e+07	1.02811e+08	4.23007e+07	5.04348e+07	4.47587e+07	7.09426e+07	1.21683e+08	5.6989e+07	4.20078e+07	1.68572e+07	1.31973e+08	4.46667e+07	6.51751e+07	6.99389e+07	5.74326e+07	6.83777e+07	8.99335e+07	5.45826e+07	6.53174e+07
M154T794	153.992	794	13.2	8.00561e+07	1.95692e+07	8.11329e+07	8.13239e+07	7.12413e+07	6.84687e+07	5.60161e+07	4.96704e+07	8.27082e+07	1.99103e+07	6.96615e+07	8.08306e+07	1.03244e+08	1.92131e+07	3.51441e+07	8.18676e+07	7.29087e+07	1.21433e+08	6.43294e+07	4.04047e+07	5.97232e+07	5.61767e+07	5.17406e+07	4.17717e+07	7.36229e+07	7.41981e+07	3.11221e+07	4.13915e+07	7.18794e+07	7.28031e+07	6.87764e+07
M154T798	153.869	797.8	13.3	2.53582e+06	1.87079e+06	2.67084e+06	1.85912e+06	3.32482e+06	437687	3.2696e+06	2.28945e+06	2.96757e+06	2.23557e+06	2.25799e+06	2.76249e+06	1.04802e+06	4.62829e+06	1.65555e+06	3.11519e+06	2.77703e+06	2.08748e+06	2.16155e+06	2.05284e+06	2.98547e+06	1.88782e+06	3.0159e+06	2.48461e+06	1.74712e+06	1.75584e+06	1.97037e+06	1.87129e+06	1.28459e+06	1.72906e+06	1.88143e+06
M154T809	153.992	809.4	13.5	1.36876e+08	3.14168e+07	5.88255e+07	1.26822e+08	5.40974e+07	4.6542e+07	1.10362e+08	3.65552e+07	9.59149e+07	6.95508e+07	9.91614e+07	6.28715e+07	1.56378e+08	2.15735e+07	1.12902e+08	4.71488e+07	4.45729e+07	3.22295e+07	5.34277e+07	1.33549e+08	1.1887e+08	1.0682e+08	4.71539e+07	1.20639e+08	8.99681e+07	9.729e+07	1.17212e+08	1.009e+08	8.88027e+07	8.42152e+07	7.6889e+07
M154T816	153.869	815.9	13.6	4.50993e+06	1.24195e+07	2.91598e+06	1.57778e+07	5.3798e+06	7.67049e+06	3.80004e+06	2.56964e+06	9.78983e+06	1.89725e+06	8.88477e+06	1.27437e+06	8.18535e+06	1.63843e+06	768751	2.22779e+06	1.14256e+06	6.22178e+06	4.83898e+06	2.46935e+06	978283	3.39342e+06	9.85451e+06	8.61928e+06	3.67715e+06	3.68154e+06	4.21627e+06	3.89051e+06	3.19476e+06	4.16387e+06	4.07793e+06
M154T819	153.992	818.7	13.6	1.2366e+08	1.21775e+08	1.44307e+08	1.42185e+08	2.77158e+07	5.93059e+07	1.39765e+08	9.95822e+07	1.16582e+08	1.86529e+08	6.59044e+07	8.4735e+07	1.14018e+08	8.82041e+07	1.35361e+08	1.87764e+08	1.33981e+08	1.28452e+08	1.87999e+08	6.0176e+07	1.04112e+08	1.06269e+08	9.26572e+07	9.14031e+07	7.44491e+07	9.47034e+07	1.66279e+08	9.16274e+07	1.26903e+08	1.16195e+08	1.46991e+08
M154T832	153.992	832.5	13.9	6.02622e+07	2.46274e+07	5.154e+07	5.3082e+07	4.36343e+07	7.00614e+07	2.87219e+07	3.30642e+07	1.96432e+07	7.43953e+07	5.93813e+07	7.80742e+07	4.8959e+07	4.27394e+07	3.05372e+07	6.96157e+07	3.71893e+07	7.98313e+07	1.09372e+08	3.42887e+07	6.53488e+07	5.8162e+07	2.78322e+07	3.51541e+07	3.89767e+07	4.32774e+07	4.32162e+07	3.65814e+07	3.97019e+07	5.05143e+07	3.96148e+07
M154T836	153.869	836.3	13.9	9.77241e+06	2.83259e+07	7.60059e+06	1.07135e+07	8.64524e+06	2.15534e+07	5.75306e+06	7.71032e+06	1.08959e+07	4.50584e+07	3.0179e+07	7.57246e+06	5.92952e+07	5.66557e+07	1.06469e+07	3.7996e+07	2.62518e+07	2.46201e+07	5.54258e+06	8.53539e+06	1.4839e+07	3.01743e+07	2.90202e+07	1.23316e+07	8.89593e+06	1.36832e+07	8.68089e+06	1.02571e+07	8.15412e+06	8.20726e+06	8.13629e+06
M154T89	153.998	88.7	1.5	696847	715111	848058	903163	7.00931e+06	1.05945e+06	5.52125e+06	5.66507e+06	7.36264e+06	1.6895e+06	5.99849e+06	6.07039e+06	1.38125e+06	6.45714e+06	8.26673e+06	5.61677e+06	5.10981e+06	1.60781e+06	9.23635e+06	7.20105e+06	6.24935e+06	7.00782e+06	1.52165e+06	9.40145e+06	4.4749e+06	1.73229e+06	4.13384e+06	4.52735e+06	4.12655e+06	4.1322e+06	4.1198e+06
M154T94	154.062	93.7	1.6	3.70824e+08	1.19062e+09	4.61067e+08	6.08675e+08	3.63947e+08	2.77374e+08	5.1469e+08	9.38598e+08	2.00785e+08	3.25325e+08	2.01873e+08	1.68586e+08	1.7383e+06	3.50904e+08	1.71208e+08	2.00127e+08	7.77793e+08	1.00278e+08	3.98529e+08	1.65013e+08	6.13512e+08	3.95199e+08	1.98031e+08	4.87193e+08	3.43124e+08	3.43338e+08	3.532e+08	3.42925e+08	3.89053e+08	3.22516e+08	3.52754e+08
M155T108	155.035	108	1.8	1.73096e+06	864789	1.10313e+06	1.11899e+06	1.60819e+06	1.64152e+06	1.51651e+06	1.14816e+06	1.36149e+06	1.30996e+06	2.44283e+06	1.47962e+06	1.37888e+06	1.7467e+06	982493	1.14009e+06	969878	1.10622e+06	1.79765e+06	3.248e+06	1.48388e+06	1.23917e+06	2.38382e+06	2.14458e+06	1.44225e+06	1.4117e+06	1.43494e+06	1.41151e+06	1.41149e+06	1.42785e+06	1.25536e+06
M155T121	155.035	120.6	2	939010	915963	876087	271006	793058	1.10922e+06	988190	1.05516e+06	1.15733e+06	174161	937016	821131	1.02874e+06	1.18068e+06	1.30974e+06	956016	801651	929228	1.57325e+06	995294	846117	1.11612e+06	1.45552e+06	680565	871960	873335	874869	831488	520677	876941	825610
M155T31	154.869	31.1	0.5	18930	17833.8	16176.9	17866.6	17566.2	13230.8	17450.2	17770	14827	19221.8	17921.7	16414.9	16964.2	18756.2	19832.8	22156.9	20292.4	20089.8	21558.3	19492	18184.8	16044.1	14273.6	20753.8	19230.9	18607.6	18249.4	18767.5	19213.1	18753.7	18558.1
M155T344	155.071	343.9	5.7	945806	1.303e+06	1.03844e+06	1.66852e+06	691545	906393	977076	1.19943e+06	918361	951301	1.2229e+06	1.07912e+06	1.0471e+06	1.19441e+06	1.10154e+06	933094	879215	1.10312e+06	1.11472e+06	1.08555e+06	1.05845e+06	657116	832138	1.22618e+06	1.15512e+06	1.12171e+06	1.1218e+06	1.10832e+06	1.10495e+06	1.08985e+06	1.12205e+06
M155T393	155.035	393.4	6.6	7.30435e+06	1.3505e+07	1.26389e+07	4.68873e+06	3.96833e+06	3.02078e+06	1.16803e+07	1.28018e+07	5.38676e+06	5.5437e+06	5.72237e+06	7.26666e+06	1.39784e+06	7.7423e+06	6.85084e+06	8.46267e+06	1.06027e+07	9.42242e+06	1.12168e+07	5.4536e+06	9.56834e+06	1.26341e+07	1.3317e+07	1.0283e+07	7.25773e+06	4.35487e+06	6.82547e+06	6.848e+06	7.85891e+06	7.39807e+06	7.19642e+06
M155T572	155.108	572.4	9.5	132385	29224.7	282151	124364	880908	60470.6	473405	258491	205620	194135	258949	144345	226988	175250	219315	615319	391017	225576	530700	110831	515150	195504	442413	196322	165976	166372	175780	170219	168574	306478	190583
M155T648	155.108	647.6	10.8	574585	511860	368532	1.42561e+06	438738	176328	551078	488431	805573	1.77662e+06	1.04505e+06	767937	203503	841184	317837	822085	844690	1.07327e+06	1.95064e+06	862747	760171	651324	737578	1.13795e+06	514610	531756	560691	539733	500639	496519	412108
M155T82_1	154.881	82.4	1.4	3.05686e+06	4.96907e+06	4.49381e+06	5.87048e+06	5.52715e+06	250532	5.09405e+06	3.44733e+06	3.63653e+06	2.23911e+06	4.28664e+06	2.56687e+06	2.25721e+06	2.01052e+06	3.15954e+06	4.10651e+06	3.94108e+06	4.52171e+06	5.80697e+06	4.46972e+06	3.9902e+06	2.93799e+06	2.52014e+06	3.30874e+06	2.09571e+06	3.41261e+06	3.20332e+06	3.70892e+06	3.11848e+06	3.68166e+06	2.48823e+06
M155T82_2	154.928	82	1.4	1.35751e+07	1.38494e+07	1.29648e+07	1.20887e+07	1.25908e+07	1.15328e+07	1.3984e+07	1.3419e+07	1.26549e+07	1.64919e+07	1.24781e+07	1.23587e+07	1.35314e+07	1.26934e+07	1.09996e+07	1.12163e+07	1.0052e+07	9.4487e+06	9.45146e+06	1.03409e+07	9.27131e+06	1.05687e+07	9.50918e+06	9.97554e+06	1.11271e+07	1.08304e+07	1.08222e+07	1.17801e+07	1.41162e+07	1.14415e+07	1.08472e+07
M155T93	155.035	92.6	1.5	950447	710740	1.02667e+06	894273	1.03442e+06	821793	835307	782985	1.79905e+06	1.02083e+06	1.5545e+06	2.06099e+06	1.17735e+06	1.7179e+06	2.43274e+06	2.07324e+06	1.42199e+06	1.74947e+06	810798	747039	1.21414e+06	1.75868e+06	2.3519e+06	1.18399e+06	1.36404e+06	1.20208e+06	1.0609e+06	1.20226e+06	1.16088e+06	1.01553e+06	1.16123e+06
M155T94_1	155.046	93.7	1.6	2.47394e+06	2.18121e+06	2.87699e+06	2.64888e+06	3.34644e+06	3.25513e+06	2.01592e+06	2.07178e+06	4.27504e+06	7.72448e+06	6.4524e+06	3.37218e+06	5.16133e+06	3.60228e+06	4.17115e+06	3.90238e+06	1.90831e+06	5.62637e+06	3.00867e+06	4.06992e+06	3.53277e+06	3.78945e+06	3.47662e+06	6.16349e+06	3.23308e+06	3.22829e+06	3.42809e+06	3.4308e+06	1.50241e+06	3.23592e+06	3.42338e+06
M155T97	155.01	96.7	1.6	6.15604e+06	6.44625e+06	6.14584e+06	4.66723e+06	6.39185e+06	5.53819e+06	6.67194e+06	1.59596e+06	4.3075e+06	2.78292e+06	5.45155e+06	4.72846e+06	2.17168e+06	4.39514e+06	3.40424e+06	3.83351e+06	6.87709e+06	4.45472e+06	9.9539e+06	6.11569e+06	7.4853e+06	4.51766e+06	4.55876e+06	3.78679e+06	4.87224e+06	4.96074e+06	4.95979e+06	5.35453e+06	4.95953e+06	4.87122e+06	4.73486e+06
M156T104	155.874	103.8	1.7	120111	260894	571468	308744	841663	473251	251853	980961	854707	521600	196378	1.0384e+06	807297	1.11786e+06	717689	317018	437442	495198	661185	953980	741727	352646	854872	832748	207242	543219	421112	376457	333059	523959	516646
M156T107	155.953	107.4	1.8	341898	209597	254427	271612	385078	265675	148688	272400	157920	623009	258809	386725	401812	227364	355039	224689	104372	70427.3	153453	93636	197010	792667	215445	896620	261680	322804	306392	231790	305832	454835	306490
M156T126	155.953	126.3	2.1	103488	66277.3	135845	74685.2	142361	59602.5	109406	77590.5	94363	130812	120634	132158	135055	70508.6	118131	100186	169053	123339	175598	105183	115602	134746	102852	137086	102040	104130	101799	95699.8	106173	101894	118465
M156T31	155.916	30.8	0.5	184633	39372.2	57643.8	128541	65188.6	47205.7	126304	152507	144789	45874.9	46246.7	141078	38891.5	174285	42905.5	156761	167678	32434.4	46530.2	230800	216145	41109.6	146094	171931	78369.7	95477.1	75106.8	103682	77810.6	76750.7	76292.8
M156T326	156.042	326	5.4	108050	340449	75951.9	431206	140828	79380.6	74906.9	52956.1	69069.7	33360.9	63390.7	36900.4	71687	19747	39491.7	46922.1	131094	89368.6	218941	86448	83016.6	36813.3	103230	92263	99930.1	99964.8	97768.9	99878.2	59560.7	95695.4	100012
M156T37	155.874	37	0.6	661600	639862	715657	654118	431467	461077	773215	658558	485400	619854	379430	446287	393282	506201	428593	517486	689410	457055	432036	786232	543456	403695	419074	517537	335466	339596	399121	405857	405098	406280	377903
M156T393	156.038	393.4	6.6	565055	766650	423919	720577	505728	501689	610061	624986	503684	392645	529610	384078	420837	458538	444699	191771	568194	477636	578975	568303	397072	495293	524621	529357	485668	499764	469386	470266	497892	207746	499099
M156T408	156.103	408.4	6.8	571691	498739	599565	664040	417894	762337	478813	463515	569667	927410	809058	573176	501419	581327	582841	580722	539577	650673	718499	1.23446e+06	545694	774609	612574	758581	553668	425207	575564	554572	581042	555453	604606
M156T54	155.874	54.4	0.9	126480	244568	235004	338998	295661	81374.1	278516	286286	413697	342693	358481	288410	131527	144362	357328	492240	314692	105654	123259	293924	351921	400722	403625	376296	300297	255953	278496	299246	258647	324688	324039
M156T631	155.874	630.8	10.5	272000	438206	338936	151161	208230	120908	225291	435039	161397	481270	354020	359669	100703	315736	234242	311171	219211	288088	618959	487883	409276	381288	162975	372587	334330	234453	335228	385725	316271	315612	316657
M156T644	155.875	644.4	10.7	1.70537e+06	1.28771e+06	1.39466e+06	1.64155e+06	663027	1.91514e+06	1.41573e+06	1.69074e+06	1.05157e+06	1.29421e+06	1.54457e+06	1.47317e+06	1.16096e+06	1.20438e+06	776023	1.15018e+06	1.55337e+06	2.08649e+06	911364	868304	1.43356e+06	1.16978e+06	1.33455e+06	1.51149e+06	1.44597e+06	1.38858e+06	1.38695e+06	1.58774e+06	1.39327e+06	1.73077e+06	1.38576e+06
M156T686	155.875	686.1	11.4	1.34307e+06	3.27547e+06	1.62606e+06	3.12885e+06	2.39102e+06	310852	1.51832e+06	2.09311e+06	967569	1.68451e+06	1.24284e+06	1.65411e+06	848604	1.69296e+06	1.47337e+06	1.12335e+06	1.63066e+06	640321	1.42127e+06	1.92696e+06	1.53573e+06	464289	1.0076e+06	1.90183e+06	1.33025e+06	1.33003e+06	1.43526e+06	1.30709e+06	1.30671e+06	1.33068e+06	1.30689e+06
M156T72	155.978	72.4	1.2	1.41293e+06	1.34687e+06	1.44051e+06	1.27792e+06	2.14053e+07	7.24712e+06	1.44059e+06	1.20007e+06	938146	1.35562e+06	1.43127e+06	1.16975e+06	7.17874e+06	1.23604e+06	984887	1.02426e+06	1.36214e+06	1.28101e+06	1.35861e+06	1.37954e+06	1.34343e+06	7.42374e+06	784167	1.39293e+06	1.08538e+06	1.19181e+06	1.1831e+06	1.22437e+06	1.22415e+06	1.18648e+06	1.22563e+06
M156T723	155.874	722.5	12	3.86822e+06	1.26586e+06	1.12335e+06	3.18895e+06	1.91363e+07	2.08177e+06	5.39963e+06	2.90626e+07	1.13671e+07	9.9228e+06	4.34742e+06	2.53409e+06	6.39615e+06	1.02984e+07	2.9557e+06	1.01358e+07	1.48543e+07	6.16395e+06	1.1446e+07	1.74466e+07	3.01723e+06	1.04355e+07	8.73355e+06	9.62182e+06	2.2437e+06	2.25552e+06	2.25225e+06	2.25354e+06	2.44175e+06	2.64948e+06	2.41434e+06
M156T750	155.874	750.1	12.5	1.97531e+06	1.53674e+06	1.28643e+06	1.54101e+06	974734	493474	1.9405e+06	1.12396e+06	1.79871e+06	1.84731e+06	1.8609e+06	2.47092e+06	613664	1.90996e+06	1.20416e+06	1.74528e+06	2.90444e+06	710223	2.02551e+06	2.52199e+06	1.35806e+06	855821	862536	2.22772e+06	1.22422e+06	1.7613e+06	1.46125e+06	1.17523e+06	1.26381e+06	1.36423e+06	1.26231e+06
M156T836	155.866	836.3	13.9	3.81351e+06	7.48587e+06	6.18802e+06	1.19029e+07	4.8107e+06	9.4908e+06	5.84315e+06	1.33922e+07	5.94529e+06	4.94958e+06	8.71987e+06	1.70316e+07	8.7854e+06	8.19061e+06	7.66032e+06	1.17638e+07	9.20653e+06	5.70047e+06	1.01196e+07	7.6824e+06	5.75071e+06	4.7178e+06	7.4722e+06	3.60304e+06	5.87775e+06	5.8846e+06	6.20479e+06	5.90335e+06	5.88304e+06	6.46051e+06	6.16075e+06
M156T85	156.028	85.2	1.4	5.03305e+06	5.6146e+06	5.28074e+06	6.18692e+06	5.21857e+06	5.38826e+06	5.43839e+06	5.09519e+06	5.68721e+06	5.0277e+06	5.17642e+06	5.07826e+06	5.21984e+06	5.13254e+06	5.03101e+06	5.09789e+06	5.02074e+06	5.05242e+06	5.58986e+06	5.84147e+06	5.35666e+06	1.42309e+06	4.96207e+06	5.10481e+06	4.77861e+06	4.88807e+06	4.76958e+06	5.22664e+06	5.32144e+06	4.95556e+06	4.95442e+06
M156T88	156.078	88.4	1.5	1.6326e+06	1.90584e+06	1.10904e+06	1.21697e+06	1.7894e+06	1.5489e+06	1.60067e+06	1.60373e+06	2.20328e+06	1.91391e+06	1.93522e+06	1.52472e+06	1.72265e+06	1.24475e+06	1.37253e+06	1.84127e+06	1.15164e+06	1.69211e+06	2.02329e+06	1.73735e+06	1.47659e+06	1.54531e+06	1.46007e+06	1.37713e+06	1.52738e+06	1.45108e+06	1.38604e+06	1.35518e+06	1.64747e+06	1.45749e+06	1.64219e+06
M156T94	156.066	93.6	1.6	1.34911e+06	1.69977e+06	1.98051e+06	1.89626e+06	1.34591e+06	1.43099e+06	1.69853e+06	1.38837e+06	1.63297e+06	1.53522e+06	1.93911e+06	1.37035e+06	1.5125e+06	1.40625e+06	1.63407e+06	1.51306e+06	1.71842e+06	1.56288e+06	1.87669e+06	1.59543e+06	1.67717e+06	1.73495e+06	1.78066e+06	1.60587e+06	1.78441e+06	1.42e+06	1.8527e+06	1.96005e+06	1.8223e+06	1.73614e+06	1.66239e+06
M157T753	157.123	753.5	12.6	3.11894e+06	6.1756e+06	4.75264e+06	1.19425e+07	3.65246e+06	6.81016e+06	6.75089e+06	5.75729e+06	1.64441e+07	2.02289e+07	2.57651e+07	132315	1.60233e+07	3.50785e+07	1.10149e+07	1.09267e+07	113639	6.98077e+06	7.13783e+06	6.40732e+06	1.75291e+07	9.69196e+06	1.36104e+07	1.09406e+07	7.1408e+06	7.89831e+06	8.03269e+06	7.75551e+06	6.89587e+06	6.95996e+06	6.70914e+06
M157T82	156.925	82	1.4	4.42625e+06	3.62232e+06	4.51354e+06	3.80461e+06	3.5009e+06	2.51286e+06	3.0185e+06	1.20315e+06	2.96584e+06	4.05206e+06	4.15799e+06	1.21877e+06	3.3757e+06	1.97462e+06	2.17172e+06	2.16365e+06	3.29195e+06	4.32168e+06	5.60719e+06	4.03977e+06	3.57032e+06	3.96073e+06	3.81388e+06	6.08204e+06	3.76376e+06	3.50019e+06	3.16727e+06	3.81791e+06	4.42544e+06	3.76199e+06	3.63575e+06
M157T85	157.012	84.7	1.4	4.34831e+08	2.76455e+08	3.01467e+08	1.04433e+08	8.84318e+07	1.04441e+08	5.8574e+08	3.64465e+08	3.39006e+08	3.43235e+08	3.57909e+08	3.74701e+08	3.31804e+08	3.69861e+08	4.88382e+08	2.62049e+08	1.01816e+08	2.74508e+08	7.29309e+08	3.92786e+08	2.5916e+08	3.30971e+08	3.33671e+08	3.21435e+08	1.75324e+08	2.8287e+08	1.04467e+08	2.30273e+08	2.31965e+08	1.6869e+08	2.31208e+08
M157T90_1	156.999	89.5	1.5	1.04686e+06	926403	1.08803e+06	1.16416e+06	1.02322e+06	125308	1.01486e+06	1.12966e+06	807513	1.64241e+06	701506	924898	1.18109e+06	1.20753e+06	937798	1.2603e+06	645446	995770	1.41433e+06	1.22143e+06	1.48467e+06	916872	960789	1.28905e+06	1.07031e+06	1.07002e+06	1.0704e+06	955769	1.08538e+06	1.09615e+06	1.07056e+06
M157T90_2	157.062	89.9	1.5	933390	642218	784010	516642	805681	505968	811283	608198	79850.7	65736.4	68637.9	63574.7	45714.2	77741.5	51436.1	45499.1	987036	40274.7	963323	795572	647989	55647.4	53757.9	58745.6	372330	355720	361039	361092	350576	353141	358331
M157T98	156.963	98.5	1.6	788917	2.07412e+06	712821	1.01489e+06	570721	1.08546e+06	530689	1.19025e+06	626231	2.86701e+06	722760	927430	838315	1.94521e+06	1.90513e+06	1.50022e+06	2.61869e+06	5.98113e+06	3.27134e+06	1.06146e+06	1.78928e+06	1.50957e+06	1.22046e+06	3.42374e+06	955208	1.15111e+06	1.06951e+06	960717	961543	960978	1.47967e+06
M158T104	157.872	103.8	1.7	303504	710328	740248	596264	976271	660462	192962	223991	594623	665143	637826	545169	197187	505205	193611	892737	174820	726303	1.34089e+06	168239	160491	245313	929028	203880	288887	467157	289708	289933	390728	287788	289932
M158T111_1	158.082	111.4	1.9	950289	7.94591e+06	3.68157e+06	6.98639e+06	4.91098e+06	1.77176e+06	4.6963e+06	3.40955e+06	696750	974253	995389	712979	2.76971e+06	455661	2.32204e+06	513419	1.00017e+06	692387	6.56598e+06	3.8108e+06	3.62558e+06	455987	2.09892e+06	5.41809e+06	2.42655e+06	2.29348e+06	2.26386e+06	2.16773e+06	1.56591e+06	1.22084e+06	2.26106e+06
M158T111_2	158.119	111.4	1.9	129484	526431	350965	465615	319385	611217	196604	448722	659352	169793	321382	4368.18	260752	533986	221723	417444	394313	366763	151225	290211	272587	175232	250054	248690	599983	474047	484739	485430	484548	507019	495574
M158T121	158.046	121.5	2	2.05885e+06	1.90623e+06	2.05498e+06	1.63818e+06	2.13028e+06	1.97468e+06	2.02901e+06	2.34554e+06	2.10755e+06	3.18448e+06	2.07188e+06	2.74297e+06	3.27877e+06	2.30839e+06	3.52071e+06	1.87803e+06	2.27969e+06	2.40542e+06	1.90167e+06	1.93619e+06	2.25958e+06	2.54706e+06	2.5779e+06	3.16891e+06	1.5905e+06	2.37131e+06	2.18901e+06	1.89181e+06	2.28445e+06	2.316e+06	2.28481e+06
M158T127	157.931	126.7	2.1	214739	221116	217738	422948	237483	46952.2	247454	347815	51888.9	209167	79775.3	97174.1	196905	244046	134392	275906	268358	48249.8	370527	254648	269754	67518.8	77216.3	116144	132423	133958	133688	145565	82016.8	152861	180724
M158T148	158.046	147.7	2.5	222534	242097	262597	292509	265930	396705	263133	371188	393166	396305	315705	545209	360221	537023	411585	531299	307987	416835	405401	412504	486188	481530	458145	394335	368874	368989	368785	368870	368883	421555	376704
M158T285	157.931	285.2	4.8	143628	229914	352570	6348.29	133619	180992	3592.83	187974	573859	802069	355274	666106	895880	694104	722663	653981	212990	968384	275454	343144	313797	361404	494086	390618	177230	177164	124774	94720	140979	177478	206730
M158T304	158.082	304.2	5.1	3.35882e+06	2.90454e+06	3.3823e+06	2.33284e+06	2.64678e+06	6.10826e+06	3.55674e+06	3.82911e+06	3.72604e+06	3.44049e+06	5.10257e+06	5.34339e+06	3.7088e+06	4.92602e+06	3.95951e+06	4.30175e+06	3.40625e+06	4.02139e+06	6.18843e+06	5.76777e+06	5.1677e+06	4.59792e+06	4.38237e+06	4.59144e+06	3.62685e+06	3.83412e+06	3.73412e+06	3.83437e+06	4.13184e+06	3.76157e+06	3.83261e+06
M158T374	157.931	374.1	6.2	99179.8	264419	64213.3	354294	241497	240679	313356	136830	228133	292993	422578	170055	65412.5	149237	101307	793251	156953	244936	323436	413519	405697	829980	455026	144517	153815	210355	154666	180225	157760	193323	113704
M158T431	158.119	430.5	7.2	96843.9	239025	101577	162700	76711.9	89122.4	76389.7	92603	31185.7	10271.1	35898.2	6916.57	34873.7	13483.4	12369.6	9908.59	57514.9	33202.8	113896	102147	55164.3	20253	41029.3	23925.9	67463.1	64375.3	65605.8	60370.5	64384.6	66348.6	66259.2
M158T461	158.065	461	7.7	131302	167409	160440	233133	141288	95286.8	139780	114917	70454.6	68016.4	114102	49951.3	88182.7	53554.1	48804.6	53645.8	102126	90768.6	115285	130982	84416.2	61365	81182.8	104444	95963.1	95951.9	94287.9	101253	105627	97988.2	96022.8
M158T54	157.872	54.4	0.9	216121	228191	233867	215015	200478	202935	240614	160661	214580	187313	218111	201668	184544	149596	221904	146731	210768	168045	201805	214987	219077	217512	259569	283300	166901	160756	174625	171178	187163	164159	171081
M158T754	158.127	753.5	12.6	235567	758651	162436	596781	311592	451405	1.20433e+06	697467	1.8791e+06	369704	940658	33887	165146	1.67978e+06	164337	2.55409e+06	24259.3	534050	731769	906821	1.70676e+06	396898	683082	101696	835424	601830	369094	559228	603379	834607	703343
M158T90	158.046	90.4	1.5	217475	1.40756e+06	503467	1.60519e+06	874636	549447	206827	157840	821003	881485	758780	774909	1.18305e+06	194741	765986	232595	197640	1.06609e+06	1.10872e+06	170031	824569	693009	1.11165e+06	1.13807e+06	737152	831702	724506	762640	768570	718751	750518
M158T97	158.046	97.4	1.6	820993	936728	818316	950823	894806	871657	870901	899931	1.09576e+06	945924	853429	947430	921097	874851	1.10778e+06	956072	791256	834288	946959	921829	967494	933861	1.02429e+06	762559	891818	903608	957458	875542	874154	875200	835374
M159T116_2	159.001	115.8	1.9	55642.8	63843.3	52805.1	59083.7	56142.6	55329.9	49326.3	53205.4	57104.9	55277.1	53320.4	55107.1	49137	50503	58082.1	46196.5	48523.3	54294.8	69174.6	66263.1	52888.2	61752.4	59415.5	51625.8	50661.1	51737.6	50646.2	57218.6	52363.3	50572.2	49044.3
M159T128	158.978	128.1	2.1	1.06685e+06	1.06198e+06	1.18815e+06	961835	883809	563921	1.18244e+06	958521	540496	615915	782627	569277	401397	871810	575391	599512	1.12193e+06	301248	901512	1.05895e+06	929963	678122	418733	647609	690335	780063	795199	795110	794873	779711	814479
M159T141	158.847	141.3	2.4	351784	138779	159990	159037	398556	146905	744367	133996	604695	696095	575276	874910	610306	722638	501685	684289	580994	562312	818568	272970	379785	229261	762850	635617	548894	574270	534778	671057	563658	389819	523623
M159T304	159.086	304.2	5.1	315777	503958	259452	314702	311239	34704.2	52347.1	411519	38431	30225.4	325600	42947.3	52705.5	390294	45768	224877	431189	26163.4	388893	375881	375795	256269	60336.6	327331	266900	285867	129428	283718	289649	286890	264509
M159T32	158.932	31.6	0.5	29418.6	34242.1	34304.1	38559.8	55283.1	66089.2	54712	12892.6	26828.1	24100.5	22511.3	21301.7	48368.7	51518.7	26469.6	33670.5	30646.3	48091.6	56747	48841.9	33800.5	20513.5	12810.2	27929	36527.9	36444.8	43802.4	36125.7	38047	43266.7	43039
M159T329	158.991	328.8	5.5	30679.4	49893.3	68472.7	88915.2	66011.2	79995.8	9707.68	7408.26	791965	475999	482131	728639	252023	707538	635473	548080	89989.2	41004.3	12321.7	121654	34098.7	957945	653239	469144	381334	381381	385092	359269	363912	382570	375465
M159T369	158.847	368.7	6.1	77296.7	173668	283313	187279	249812	244704	121117	55327.4	260112	206065	299896	343781	331609	179994	284349	151126	89857.9	93016.4	366555	107925	110386	227529	214582	104676	104306	153538	207297	206601	168099	209566	207264
M159T387	159.103	387.2	6.5	1.58409e+06	1.41074e+06	1.82429e+06	1.51915e+06	1.45083e+06	1.11759e+06	1.5697e+06	1.30676e+06	1.35231e+06	1.9165e+06	1.93748e+06	1.48777e+06	607717	1.8079e+06	2.51248e+06	2.23406e+06	1.74096e+06	654714	1.63558e+06	1.87012e+06	2.07802e+06	1.53291e+06	1.57646e+06	1.36783e+06	1.44163e+06	1.44166e+06	1.46607e+06	1.44214e+06	1.49375e+06	1.32814e+06	1.4673e+06
M159T393	158.99	393.4	6.6	229238	141499	128039	780637	213682	637849	177312	178933	345022	378986	128986	170099	133699	163312	137607	136558	104526	189859	1.023e+06	160980	164250	451127	215020	248552	392769	242686	245547	270930	247654	272754	270167
M159T453	159.082	453.4	7.6	14364	62743.2	58111.7	72244	20994.5	34961.2	39094.6	21419	89863.8	49147.2	85105.3	52187.6	16097.7	105550	61088.9	97131.1	48402.2	40937.9	35677.7	41328.9	29809.4	3708.12	23611.1	10199.6	28857.5	28899.9	12842.6	27494.4	21217.2	25923.9	33822.8
M159T465	159.102	465.1	7.8	1.64093e+06	2.22964e+06	3.44925e+06	2.11159e+06	2.7023e+06	3.21417e+06	4.88902e+06	1.41458e+07	1.36002e+07	3.32377e+07	4.20975e+06	3.97281e+06	1.95413e+07	2.639e+07	5.56623e+07	5.39395e+07	6.32317e+06	1.08942e+08	3.48655e+07	6.79583e+07	2.58348e+07	1.88872e+07	2.12503e+07	3.77442e+06	1.26256e+07	1.66393e+07	8.75363e+06	1.5489e+07	1.66122e+07	1.65956e+07	1.67909e+07
M159T497	159.102	496.6	8.3	7.45044e+06	1.09598e+07	5.36896e+06	8.56863e+06	5.59441e+06	3.35853e+06	7.69955e+06	5.99335e+06	1.89376e+06	1.41442e+06	1.02367e+06	533320	2.00907e+06	899520	248339	656049	3.98974e+06	2.19981e+06	5.91859e+06	6.88868e+06	5.03986e+06	1.31271e+06	2.36627e+06	1.3248e+06	3.84146e+06	3.83306e+06	3.79064e+06	3.8267e+06	4.85136e+06	3.83217e+06	3.96935e+06
M159T525	159.056	525.3	8.8	85662.2	287235	16592.5	293198	177654	78244.9	12939.8	7169.01	98170.8	14055.5	42531.3	18429.6	85093.4	4512.28	71417.2	74459.5	136498	59310.9	143676	24154.1	80005.6	72709.4	135809	147403	102709	99481.2	124335	106219	102882	103308	102898
M159T550	159.056	549.8	9.2	1925.29	2613.4	7068.86	9229.78	8322.9	2569.54	9629.07	129593	25890.7	826938	130352	630816	6562.84	193022	124010	106598	34973	57968.7	150031	27810.5	130340	103686	191533	54743.2	98394.8	117860	123096	123115	78763.3	122876	129387
M159T698	158.847	698.3	11.6	422309	2.32535e+06	3.49457e+06	1.51822e+06	2.80134e+06	2.82747e+06	1.63292e+06	2.06693e+06	2.40318e+06	2.44379e+06	2.62049e+06	3.01639e+06	9.46823e+06	2.19649e+06	3.35017e+06	3.6076e+06	1.81581e+06	5.01387e+06	6.90798e+06	5.02944e+06	2.46538e+06	2.45356e+06	773242	3.29156e+06	3.23011e+06	3.6836e+06	3.22845e+06	3.31738e+06	3.22348e+06	3.32065e+06	3.22697e+06
M159T79	158.925	78.7	1.3	4.53177e+07	5.47105e+07	3.82299e+07	5.50946e+07	3.91697e+07	4.22218e+07	1.30499e+07	5.5578e+07	7.1442e+07	1.58506e+07	6.41855e+07	7.70509e+06	4.91827e+07	5.47632e+07	1.1139e+07	2.94863e+07	3.68608e+07	4.69071e+07	3.93111e+07	1.83916e+07	1.58905e+07	1.6543e+07	1.15284e+07	2.60283e+07	3.05656e+07	3.08093e+07	1.98862e+07	3.08639e+07	3.6675e+07	3.652e+07	3.68627e+07
M159T85	159.016	84.6	1.4	273414	249814	2.17374e+06	2.32492e+06	4.32777e+06	5.80486e+06	563494	1.92467e+06	1.51431e+06	5.62668e+06	57239.1	101778	2.00458e+06	129834	437863	187857	270418	109310	3.60439e+06	5.09423e+06	1.4007e+06	418682	123154	3.53167e+06	2.60053e+06	2.04191e+06	2.05321e+06	1.79964e+06	1.66181e+06	1.91199e+06	2.05149e+06
M159T89	159.072	89.2	1.5	633696	520829	513224	326271	383261	509314	508251	124143	609835	922416	716607	633723	905349	628542	1.19009e+06	764362	625610	707795	858125	843334	185208	1.41111e+06	981921	733143	526488	518036	517186	518063	571543	513834	526371
M159T90	158.978	90.1	1.5	1.25938e+07	2.39421e+06	1.69021e+06	1.40843e+07	2.54347e+06	3.15877e+07	1.23821e+07	2.5882e+06	7.7352e+07	5.2395e+07	6.48358e+07	4.39292e+07	1.52739e+08	4.2658e+07	8.10365e+07	7.81076e+07	1.72762e+06	1.14123e+08	3.34059e+07	2.0655e+07	2.0212e+07	8.71586e+07	8.63366e+07	5.36291e+07	4.17314e+07	4.14627e+07	3.98354e+07	4.18611e+07	3.48635e+07	4.17211e+07	2.77673e+07
M159T97	159.03	96.6	1.6	912341	871637	936963	871946	1.10895e+06	1.0645e+06	1.10758e+06	648640	2.9924e+06	2.96739e+06	2.18028e+06	2.02742e+06	1.87234e+06	1.95319e+06	2.2531e+06	2.8961e+06	873971	2.15273e+06	1.07354e+06	2.57127e+06	1.69786e+06	2.88619e+06	3.21434e+06	2.85011e+06	2.02879e+06	1.853e+06	1.95919e+06	1.79389e+06	2.02233e+06	2.02261e+06	2.023e+06
M160T116	160.061	116.2	1.9	2.17808e+06	2.5818e+06	2.40717e+06	924182	2.37477e+06	872122	2.16592e+06	3.25786e+06	796158	1.23012e+06	2.04666e+06	2.9759e+06	3.30042e+06	1.38856e+06	2.30031e+06	3.43959e+06	1.23752e+06	585484	1.09055e+06	2.89182e+06	587396	1.65748e+06	1.13919e+06	580221	2.25252e+06	2.09662e+06	2.25646e+06	2.34944e+06	2.26247e+06	1.92526e+06	1.92472e+06
M160T119	160.007	118.8	2	281313	272091	271689	243669	198955	187811	272022	259762	200100	243937	234561	172418	118889	232790	236176	214245	265633	176283	272037	54582.3	282751	148774	120011	182846	233382	233264	245211	234152	301679	233634	244401
M160T31	159.939	31.2	0.5	35759.6	30732.7	6849.97	27113.7	50516.2	73157.7	27351.4	22204.1	16311.5	19679.8	30076.6	31187.1	22275	64837.3	22335.5	17819.4	22385.4	23477.5	82760.8	21442.1	14511.5	14041	11858.1	17718.2	18755.3	15579.8	14350.2	22424.8	18304.2	19286.9	26512.2
M160T32	159.894	31.5	0.5	76755.1	88483	90256.5	77582.3	86374	77427.7	86377.2	80451.6	208292	218968	187101	160453	168725	159809	224852	171422	79056.8	149668	86393	89229.5	73411.3	257659	291052	202980	138363	138371	138661	138361	156754	134885	141075
M160T431	160.052	430.9	7.2	50268.3	118265	101923	30631.4	21585.8	145270	33212.8	30852.8	20308.9	273514	356128	244019	182856	119125	41635.6	164540	193583	492154	294802	298062	195328	385805	700122	343181	186698	183709	71623.2	139362	183115	160772	214390
M160T465	160.106	465.1	7.8	3.2822e+06	1.90699e+06	2.58707e+06	1.87202e+06	2.39382e+06	1.0755e+06	2.31173e+06	1.79967e+06	850319	719484	1.54747e+06	917639	87482	1.08879e+06	1.11366e+06	874025	1.11233e+06	148038	1.80481e+06	1.63738e+06	1.39462e+06	1.36938e+06	885051	1.09374e+06	1.40463e+06	1.37964e+06	1.37961e+06	1.71364e+06	1.38032e+06	1.421e+06	1.68261e+06
M160T497	160.106	496.6	8.3	675526	70060.2	482330	438205	482938	364882	611971	426120	501204	525762	520633	548746	363619	217616	581115	582894	287394	384004	399665	411253	377152	109911	164083	240853	358684	414371	384346	392717	393012	384296	379912
M160T90	159.979	90.2	1.5	6.68361e+06	6.06362e+06	6.67277e+06	6.71853e+06	7.12983e+06	5.31089e+06	7.87168e+06	5.61283e+06	1.70537e+06	759429	2.40643e+06	1.86458e+06	2.27665e+06	3.15474e+06	3.41213e+06	503952	6.40879e+06	498994	6.8272e+06	6.65166e+06	6.00041e+06	452021	377792	3.98067e+06	4.02193e+06	3.84783e+06	4.23524e+06	4.02125e+06	2.65435e+06	3.83419e+06	3.83572e+06
M160T99_1	159.979	99.3	1.7	330850	1.49624e+06	1.39115e+06	275001	1.44547e+06	1.03692e+06	1.33549e+06	1.01762e+06	1.4237e+06	307355	2.12785e+06	1.3481e+06	332435	1.33247e+06	347271	1.05224e+06	285527	237710	1.09103e+06	327083	326770	1.6078e+06	253673	255093	821727	954536	681320	660853	951577	962365	954823
M161T134	160.842	134.5	2.2	8.36979e+06	8.44479e+06	8.42997e+06	1.04083e+07	5.44659e+06	7.82721e+06	6.20828e+06	8.70454e+06	1.44301e+07	1.41633e+07	1.4584e+07	1.49981e+07	1.37827e+07	8.33153e+06	1.51785e+07	2.38817e+07	8.94817e+06	1.45475e+07	1.01499e+07	1.2844e+07	9.87962e+06	1.46441e+07	1.57708e+07	1.59378e+07	1.04886e+07	1.00597e+07	1.48482e+07	1.09189e+07	1.09439e+07	1.0258e+07	1.0957e+07
M161T31_1	160.918	30.8	0.5	114100	99749.9	105692	86836.1	97446.5	82368.3	106633	92921	130446	125090	140491	127393	122449	116412	118455	118737	118644	109324	130131	138962	129567	114104	113681	139528	113979	113923	113931	113909	115473	114693	115070
M161T31_2	160.936	31.1	0.5	71026.6	79959.6	93867.6	103030	81155.4	81604.4	104215	119829	96234	109069	81779.5	96899.5	69180.4	136292	108299	119415	97208.4	124345	108532	109615	146759	92232.4	107296	124835	107201	107207	98433.4	107209	107198	97431	107191
M161T310	160.897	309.6	5.2	138962	115913	132788	228707	121477	83255.4	102496	167165	160800	159908	108212	148282	65945.4	173615	148558	149845	104506	179636	162317	118358	160249	146400	117503	92718.6	142331	134351	159483	135339	141931	135041	121243
M161T32	160.893	31.6	0.5	128610	78027.8	123710	472783	290542	269996	311370	56119.2	85247.7	87349.2	211653	72442.2	67865	193712	88638.1	101060	120927	344238	246062	141865	267807	96744.7	580369	80200.8	126712	132617	180998	133468	128910	113777	147048
M161T384	160.842	384.1	6.4	2.28249e+07	2.44399e+07	3.2332e+07	2.09843e+07	2.47207e+07	1.97918e+07	3.27693e+07	2.2752e+07	2.60401e+07	3.35335e+07	2.48553e+07	2.91314e+07	2.82829e+06	1.08942e+07	4.07689e+07	3.76487e+07	2.53164e+07	1.27928e+07	2.10508e+07	2.83226e+07	3.55449e+07	3.18673e+07	2.36343e+07	2.69476e+07	2.21517e+07	2.38087e+07	2.24618e+07	2.37143e+07	2.37226e+07	1.03472e+07	2.37365e+07
M161T465	161.107	465.2	7.8	40713.2	21054.6	6500.38	37455.6	27505.2	4221.4	43485.7	33254.5	67409.2	76271.2	111139	69818.2	32035.5	148197	67557.6	111762	101777	9647.84	93045.5	51120.6	61253.4	47671.8	120809	66240.5	43127.9	61263.6	54393.4	54731.5	54254.1	38851.1	37014.8
M161T517	160.842	517.1	8.6	6.79337e+06	5.36536e+06	5.95316e+06	6.96917e+06	1.42638e+07	3.73591e+06	6.29393e+06	3.0385e+07	1.6391e+07	3.80835e+07	2.92329e+07	2.84914e+07	3.83798e+07	5.38859e+07	2.65022e+07	6.11207e+07	5.12487e+07	5.56024e+07	4.22886e+07	3.24154e+07	6.7936e+07	3.59115e+07	4.22189e+07	6.24214e+07	2.64847e+07	2.92866e+07	2.81118e+07	2.82111e+07	3.25338e+07	2.97511e+07	2.80812e+07
M161T592	160.842	591.9	9.9	2.18986e+07	1.86371e+07	9.71613e+06	1.04728e+07	1.67526e+07	8.46175e+06	2.29398e+07	9.80036e+06	2.09705e+07	2.63494e+07	1.9695e+07	2.04044e+07	2.07561e+07	1.80262e+07	2.17249e+07	1.80972e+07	3.53387e+07	1.52677e+07	3.09432e+07	1.82885e+07	1.86159e+07	1.79756e+07	2.256e+07	2.58411e+07	1.36061e+07	1.89048e+07	1.69934e+07	1.99538e+07	1.88606e+07	1.99088e+07	2.0145e+07
M161T602	160.842	601.7	10	1.17238e+08	3.30759e+07	5.20453e+07	6.38265e+07	3.24832e+07	2.21504e+07	8.80737e+07	8.45514e+07	2.08886e+07	6.18021e+07	7.63485e+07	6.94613e+07	8.37072e+07	6.76066e+07	3.29953e+07	1.68218e+07	7.06343e+07	4.78169e+07	8.05618e+07	9.36295e+07	5.49287e+07	2.52221e+07	2.46053e+07	2.46291e+07	3.5075e+07	3.49354e+07	4.5784e+07	3.10424e+07	2.98784e+07	3.66483e+07	2.95814e+07
M161T683	160.842	682.6	11.4	6.76474e+07	1.07419e+08	5.54444e+07	3.84998e+07	9.22821e+07	8.79079e+07	9.33924e+07	8.55572e+07	1.99796e+08	1.05367e+08	9.57912e+07	9.28964e+07	1.98625e+07	8.26589e+07	5.65144e+07	1.4906e+08	4.27249e+07	4.90217e+07	1.32465e+08	1.31477e+08	7.05098e+07	1.69401e+08	2.01762e+08	1.28565e+08	4.26676e+07	4.62804e+07	4.63918e+07	4.50888e+07	2.37718e+07	4.65436e+07	4.64752e+07
M161T697_1	160.842	697.5	11.6	2.68922e+07	7.95262e+07	4.64017e+07	9.80509e+07	3.09236e+07	1.43973e+07	2.70268e+07	4.66171e+07	3.75194e+07	6.72071e+07	5.89943e+07	4.06793e+07	3.11467e+07	3.31672e+07	3.56329e+07	2.62044e+07	4.20974e+07	1.07539e+08	7.17906e+07	5.05731e+07	4.73526e+07	3.11651e+07	2.10829e+07	4.56998e+07	5.4432e+07	6.09895e+07	5.46322e+07	4.8745e+07	3.51431e+07	4.17423e+07	4.88964e+07
M161T70	161.009	70.3	1.2	1.27721e+06	1.0425e+06	1.30842e+06	813633	1.3753e+06	742782	1.01499e+06	200762	1.20495e+06	1.46742e+06	1.36287e+06	1.56179e+06	1.67817e+06	1.30931e+06	1.41775e+06	1.26588e+06	1.18393e+06	980073	1.2906e+06	326597	1.23175e+06	1.34032e+06	1.09576e+06	1.36495e+06	1.33161e+06	1.42665e+06	1.39567e+06	1.30682e+06	1.46155e+06	1.33231e+06	1.33312e+06
M161T754	160.842	754	12.6	1.2458e+06	5.0585e+06	1.0102e+06	7.99302e+06	2.24613e+06	1.25882e+06	1.04358e+06	176065	4.023e+06	2.60859e+06	3.14793e+06	2.18275e+06	6.72302e+06	1.96767e+06	3.80811e+06	2.66669e+06	2.97494e+06	1.19503e+07	8.74877e+06	868735	1.62946e+06	2.43492e+06	6.97737e+06	8.56311e+06	3.49267e+06	1.93995e+06	3.36045e+06	3.46336e+06	3.08924e+06	2.48821e+06	3.3835e+06
M161T82	160.842	81.8	1.4	1.70028e+07	3.79349e+07	2.57961e+07	4.65247e+07	3.22613e+07	3.54878e+07	5.34253e+07	3.718e+07	1.03594e+08	9.78322e+07	9.74236e+07	1.00784e+08	8.65761e+07	8.19698e+07	1.25811e+08	1.11373e+08	1.21665e+07	1.38698e+08	2.1927e+07	1.857e+07	2.29689e+07	7.50433e+07	8.59222e+07	7.00444e+07	5.48519e+07	5.38016e+07	5.62428e+07	5.38643e+07	5.54443e+07	5.47679e+07	4.22093e+07
M161T83_1	160.915	83.1	1.4	505176	834922	1.20607e+06	1.58598e+06	1.22375e+06	296229	767203	1.58247e+06	342171	1.21712e+06	807749	864724	1.04325e+06	1.52664e+06	803286	1.06312e+06	953430	631972	2.41319e+06	1.96817e+06	2.16594e+06	504924	862915	1.21684e+06	1.1243e+06	1.17363e+06	1.09147e+06	1.12236e+06	966919	1.15659e+06	1.17361e+06
M161T83_2	161.057	82.5	1.4	376542	457324	597591	419834	374655	368593	469367	127713	616078	716507	581207	479362	734711	484343	483051	1.05024e+06	890618	776348	1.53862e+06	914841	554601	843877	666799	688333	401264	495218	495086	495482	533722	507603	507129
M161T89	161.009	89.4	1.5	676428	3.06561e+06	1.59409e+06	1.00605e+06	523261	443136	3.01156e+06	1.47095e+06	216095	1.1736e+06	1.8594e+06	2.33689e+06	1.58776e+06	2.46046e+06	1.76175e+06	1.8907e+06	1.45547e+06	581825	446781	2.70658e+06	1.18902e+06	614974	1.34569e+06	2.44064e+06	1.63867e+06	1.7177e+06	1.71826e+06	1.74822e+06	1.83552e+06	1.7725e+06	1.77131e+06
M161T90	160.976	90.2	1.5	3.33945e+06	6.86009e+06	4.30183e+06	6.00878e+06	4.8091e+06	2.88699e+06	3.2983e+06	3.24935e+06	6.75613e+06	5.95664e+06	3.82518e+06	2.98047e+06	4.87332e+06	4.24082e+06	9.8486e+06	5.67855e+06	3.44686e+06	3.89117e+06	4.74413e+06	7.63827e+06	2.20935e+06	6.6697e+06	6.17036e+06	3.3378e+06	6.5768e+06	5.60834e+06	6.03658e+06	5.65565e+06	5.67614e+06	6.74933e+06	5.66968e+06
M161T99_1	160.976	99.5	1.7	1.05767e+06	713000	970384	1.15436e+06	1.27895e+06	1.3217e+06	1.31848e+06	1.89769e+06	1.46627e+06	938000	1.12537e+06	1.04487e+06	1.22321e+06	445141	1.20774e+06	410265	1.07608e+06	598638	287038	914891	413734	1.22097e+06	433761	1.04335e+06	836811	739555	1.02952e+06	731603	1.15456e+06	1.24795e+06	1.29519e+06
M161T99_2	161.065	99	1.6	1.01591e+06	4895.98	1.08275e+06	38909.9	1.1581e+06	34765.3	1.18006e+06	2238.42	185114	1.61517e+06	195222	1.33065e+06	1.4476e+06	90601.5	1.80227e+06	40854.1	1.6026e+06	1.08463e+06	33435.9	441536	346949	1.24929e+06	141207	1.45435e+06	1.04537e+06	484984	1.14662e+06	617754	1.04437e+06	1.1577e+06	1.03067e+06
M162T111	162.023	110.6	1.8	406735	378161	423629	448005	432156	402654	537335	414862	422916	279686	267707	276771	400909	437199	527762	411402	452915	407087	432820	375545	527868	500536	509621	414394	451363	425434	437993	481044	437218	452197	437289
M162T138	161.843	138.4	2.3	251913	202896	183491	187934	185550	151832	216596	136906	230524	280373	273792	207954	310775	322188	25129.4	55794.5	204926	162694	171675	189776	242732	223014	92305.6	203754	178732	181992	178581	181901	165846	145198	165605
M162T139	162.023	138.9	2.3	607836	800575	646716	833898	520460	532329	601778	734383	579556	35651.5	767296	451928	100493	101150	780186	836655	593091	524921	656875	414932	447179	571523	581182	591468	488276	454394	488399	512360	447850	321336	447738
M162T149	162.042	149.1	2.5	140046	268144	12766.9	259056	24175.8	238216	168198	212478	224430	120576	226923	130102	92063.5	356876	140058	215077	20156.6	112549	677288	280426	369143	147816	260530	124677	162661	221301	168175	196260	149699	196411	218904
M162T303	162.056	303.4	5.1	178002	563167	131674	71291.3	194654	84756.1	155505	138683	53769	130155	74522.1	296964	58631	67994.4	72562.6	401113	37423.9	38410.4	250184	215178	42572	60132.4	45440.9	311539	116664	213910	207028	213100	280916	186584	210528
M162T31	161.914	31.1	0.5	48068.1	216835	24141.3	82966.5	215361	16690.9	85965	9934.82	111825	16573.7	42872.9	167404	66412.4	46067.2	109989	93491.9	15975	62328.7	76718.6	142483	68912.8	73118	57711.2	199187	66521.3	110477	65469.8	61618.9	51851.7	74042.9	75221.6
M162T374	162.056	374.1	6.2	847273	4.73526e+06	709235	6.92216e+06	750744	8.3565e+06	1.04412e+06	1.41602e+06	4.45075e+06	6.9691e+06	7.99047e+06	1.51118e+07	1.29517e+06	3.10956e+06	3.5842e+06	5.75138e+06	4.66824e+06	5.18513e+06	6.18044e+06	5.77616e+06	1.22905e+06	4.73484e+06	6.4983e+06	2.48875e+06	4.92024e+06	4.89837e+06	4.59035e+06	4.96177e+06	3.02863e+06	3.27546e+06	2.55401e+06
M162T383	161.843	383.2	6.4	81720.4	117681	83622.5	41862.6	126039	60818.7	140082	66896	56313.1	92742.4	52017.8	35297.5	34694	24362	35203.2	46790.5	30286.4	25422	8386.95	94273.5	36311.3	77824.1	25592.7	96115.4	65978.2	65610.7	65845.9	57318.2	65308.8	60611.1	63653
M162T660	162.056	660.3	11	246474	651262	161165	468407	175175	124106	206342	273190	275844	274029	179146	241629	196112	344396	301316	225969	330769	173868	392724	199184	331444	163725	119529	212111	259505	259796	148990	166168	258683	246187	259352
M162T698	161.843	697.8	11.6	2.34042e+06	97733.6	579592	64954.1	3.14292e+06	1.18617e+06	1.09289e+06	2.14152e+06	2.15479e+06	1.96276e+06	3.09838e+06	1.1061e+06	1.80718e+06	238253	307232	1.10987e+06	1.47095e+06	976656	1.92187e+06	2.10034e+06	2.13094e+06	347976	1.0859e+06	116437	1.00047e+06	992982	980860	1.13323e+06	801133	422548	679141
M162T82	161.843	81.8	1.4	1.41506e+06	1.09798e+06	1.55432e+06	891913	1.46836e+06	1.02001e+06	1.20538e+06	1.13986e+06	1.38684e+06	1.21697e+06	1.46867e+06	1.49628e+06	620380	988832	1.12407e+06	1.03862e+06	1.20747e+06	796815	1.01007e+06	1.5024e+06	1.02996e+06	1.44695e+06	977915	1.27372e+06	1.16022e+06	1.11125e+06	1.21942e+06	1.1466e+06	1.14659e+06	1.14671e+06	1.20145e+06
M162T83	161.994	83.4	1.4	2.19869e+06	3.49683e+06	3.34675e+06	2.65882e+06	3.92633e+06	3.74516e+06	3.29815e+06	3.23881e+06	2.54452e+06	2.53209e+06	3.48843e+06	3.824e+06	3.75523e+06	3.5614e+06	4.1703e+06	3.2775e+06	3.21734e+06	3.10526e+06	3.78991e+06	2.69979e+06	5.82943e+06	3.65654e+06	3.67893e+06	3.57049e+06	3.08686e+06	4.03509e+06	3.62301e+06	3.03448e+06	3.63337e+06	3.12903e+06	2.68755e+06
M162T91_1	162.049	91.3	1.5	454964	423054	556325	558751	417516	510467	535814	639221	235669	270447	327992	235242	249574	293981	207248	244970	428476	263687	531599	784301	527295	314086	208136	336637	400364	404883	399888	400184	438938	424515	400183
M162T91_2	162.077	90.9	1.5	874053	203915	339429	91110.8	222585	735301	273861	725581	647984	255786	698977	795451	246616	1.24979e+06	837658	1.3882e+06	1.13696e+06	216432	1.18215e+06	923438	1.16312e+06	683239	721281	261751	407387	754179	485124	753901	449404	756633	856805
M163T100	163.061	100.3	1.7	231478	249631	288709	263705	217891	172148	274160	373631	302374	326633	226338	341870	281493	342681	292215	278364	344397	261909	223642	209640	234012	315298	226447	372660	245065	245018	248384	248482	253602	239274	248374
M163T112	163.013	112.1	1.9	226556	181209	230512	167237	152705	123995	242602	242046	223560	285349	247067	193104	176854	304639	249616	239320	265101	303970	201104	249375	248406	203527	222053	263308	205829	223988	222701	221354	227211	221386	224014
M163T118	163.025	118.4	2	719854	327928	672165	426890	312036	426650	845922	430995	249610	165047	209542	570143	443890	671224	182002	495268	509991	714833	465926	352900	742595	207642	609561	681639	514183	560169	559471	543420	555552	334038	560277
M163T122	163.04	122.1	2	548995	462069	1.00395e+06	1.14895e+06	1.02925e+06	511837	677305	624396	1.34063e+06	1.63465e+06	1.22995e+06	981365	1.30473e+06	1.09982e+06	1.66634e+06	1.73077e+06	1.38185e+06	1.28787e+06	1.74135e+06	1.51655e+06	1.4342e+06	1.03717e+06	1.19189e+06	1.7424e+06	1.24227e+06	1.24362e+06	1.37587e+06	1.50231e+06	1.2444e+06	1.24086e+06	1.2413e+06
M163T141	162.839	141.1	2.4	2.61194e+06	1.13201e+06	2.46212e+06	790961	1.98182e+06	1.07039e+06	2.05788e+06	987073	2.53283e+06	1.74667e+06	2.37481e+06	2.61748e+06	2.14937e+06	2.23055e+06	2.90203e+06	2.24587e+06	2.17591e+06	2.90175e+06	4.85488e+06	2.32577e+06	1.46567e+06	1.54437e+06	1.85311e+06	2.55961e+06	1.4223e+06	1.35041e+06	2.79967e+06	2.96834e+06	2.73945e+06	2.28054e+06	2.80722e+06
M163T147	163.04	147.4	2.5	212865	235455	513145	452130	158362	52411.7	566105	497966	430289	619342	641141	485249	734102	756887	634628	749846	532212	784404	817429	477496	658414	941399	1.45514e+06	1.30489e+06	226424	577573	598765	549605	546403	617353	552603
M163T310	162.894	309.7	5.2	416627	613110	317240	299360	436845	108316	400507	518765	234664	363525	349081	348178	196312	330641	131588	72376	371494	559790	511388	292014	374210	364187	301560	280781	211051	244871	245146	245211	238764	221040	245210
M163T32	162.894	31.6	0.5	205663	196694	207825	207539	215864	201621	215588	198418	243228	204533	213334	210368	210123	202581	235427	207726	212065	201356	264235	249669	204780	247772	245664	212282	203532	219923	215196	225426	228683	210812	215080
M163T384	162.839	384.4	6.4	8.808e+06	2.39579e+07	2.64335e+07	2.97245e+07	1.42282e+07	1.27553e+07	2.60918e+07	6.43063e+06	1.78938e+07	2.80896e+07	2.58863e+07	2.33196e+07	1.15545e+07	2.83066e+07	2.89112e+07	2.92823e+07	1.85013e+07	8.95812e+06	1.62402e+07	2.48994e+07	2.09258e+07	2.25254e+07	4.11873e+06	2.35236e+07	2.06632e+07	2.12259e+07	1.97389e+07	1.131e+07	1.97817e+07	1.95912e+07	2.07867e+07
M163T396	163.04	395.5	6.6	1.89209e+06	2.37001e+06	1.86346e+06	3.31899e+06	1.32108e+06	910174	2.07001e+06	2.42452e+06	98481.4	110334	99315.5	32009.1	15649	156039	61449.1	227150	2.34966e+06	42969.9	2.30249e+06	3.07067e+06	2.04372e+06	83301.5	133786	96445.9	919419	969791	888421	1.06835e+06	684538	969566	936449
M163T421	163.077	420.6	7	363236	1.99384e+06	201536	289376	174314	90562.4	243104	191301	130071	262642	80981.4	116206	378084	124150	102952	98268.4	75663.2	139604	259685	364001	73063.2	88898.7	75675.1	80742.4	286361	257293	265452	257096	313198	253783	256882
M163T479	163.062	478.9	8	462408	530312	975193	1.20962e+06	993772	1.48456e+06	437166	419932	954692	1.23292e+06	493926	572050	722515	541047	170925	406041	554713	885932	1.40043e+06	825234	425756	1.65239e+06	705620	654781	735819	997077	774378	774226	702814	734474	734880
M163T498	162.999	497.8	8.3	806818	400307	1.1362e+06	713015	190487	554790	899210	580218	973328	1.17866e+06	1.04664e+06	1.24695e+06	656253	1.32874e+06	796028	1.37569e+06	1.47302e+06	1.22844e+06	1.78315e+06	1.14719e+06	1.84896e+06	779584	1.09113e+06	287752	963471	1.01552e+06	1.02482e+06	1.01611e+06	749549	962002	956174
M163T517	162.839	516.6	8.6	4.23218e+07	4.05054e+07	9.59878e+07	5.30184e+07	1.30518e+07	1.14597e+07	1.13209e+07	9.98372e+06	3.41106e+07	1.25801e+07	9.66492e+07	6.86717e+07	2.05605e+07	8.3945e+07	1.23288e+07	2.37033e+07	1.11984e+07	2.34952e+07	2.74444e+07	3.89707e+07	2.12275e+07	1.09851e+07	1.10268e+07	4.01641e+07	2.47184e+07	3.42911e+07	2.62703e+07	3.26803e+07	2.20179e+07	2.20471e+07	2.18436e+07
M163T550	162.954	549.9	9.2	20631.2	35613.5	59713.4	88892	59212.7	20344.5	43352.1	516348	155449	3.71217e+06	1.5108e+06	2.6969e+06	64871.8	1.10178e+06	638544	1.13216e+06	79776	136616	463184	191808	514546	1.01081e+06	1.19325e+06	456743	775575	774092	773466	758026	811207	803963	807688
M163T582	163.077	581.9	9.7	63181.6	61186.4	59011.8	50952.1	22226.6	40688	13737.5	39577.4	51376.7	87137.9	59424.6	81591.2	18988.4	82460.8	27995.5	33846.2	48965.1	57024.1	28223.8	24519.3	55921.5	46177	68770.6	54362.6	61729.5	25833.2	63046.9	57191.9	60909.9	60808.6	51777.1
M163T592	162.839	592.2	9.9	5.6028e+07	8.17413e+07	8.37496e+07	5.79972e+07	3.61844e+07	3.70404e+07	4.93581e+07	6.76613e+07	4.37238e+07	3.9529e+07	1.00693e+08	4.28541e+07	1.69883e+07	4.1877e+07	5.8944e+07	5.33418e+07	8.37433e+07	2.91715e+07	3.18399e+07	5.15625e+07	2.10538e+07	4.57691e+07	2.20939e+07	6.70486e+07	4.49754e+07	4.7419e+07	4.49787e+07	4.03803e+07	4.5903e+07	4.50279e+07	4.90101e+07
M163T60	162.894	60	1	240000	165117	202716	209602	242575	165843	257585	178664	224809	227025	268390	209113	177223	192989	242959	223537	295417	215206	303487	252498	258944	296714	261444	181024	195596	209517	231631	231657	231657	226353	227062
M163T609	163.04	608.9	10.1	662633	3.05019e+06	927338	2.91804e+06	965147	634325	1.14549e+06	1.12648e+06	1.9682e+06	905622	1.76241e+06	1.07501e+06	1.67829e+06	475537	707228	869401	975761	915793	799713	379354	742312	738679	1.77292e+06	1.28401e+06	945856	1.01208e+06	1.00948e+06	1.0082e+06	1.09518e+06	921678	748105
M163T655	162.839	655.1	10.9	1.99572e+08	1.46152e+09	5.39293e+07	3.38529e+09	2.10114e+08	1.86786e+08	3.79735e+07	4.56937e+07	5.80627e+07	1.5783e+07	5.7012e+07	1.21467e+07	6.26239e+07	1.73282e+07	2.4608e+07	2.75027e+07	2.37533e+08	4.80454e+07	1.85762e+08	9.51796e+07	2.20797e+08	1.45951e+07	2.71923e+08	1.1456e+08	1.13412e+08	1.12881e+08	1.02648e+08	1.13596e+08	1.00858e+08	1.04388e+08	1.00445e+08
M163T686	163.076	685.8	11.4	415278	344531	66476.6	265254	283334	34692.4	572022	29630	456825	398044	363741	560148	591869	220415	537345	528053	1.00641e+06	18956.7	966650	717363	261757	308670	524793	346890	358266	341019	464626	322903	339360	398025	339965
M163T692	163.077	691.9	11.5	22506.7	49874.8	77249.6	24280.2	30062	32478.6	71661.7	40203.5	33070.2	41846	54844.5	68151.7	35980.5	27830.8	73787.1	54869.7	49245.3	48794.2	1.49177e+06	81040.5	54332	8987.31	74509.9	57940.7	64371.8	56953.2	53620.2	56662.1	51705.5	56838.3	40558.5
M163T698	162.839	697.9	11.6	7.04446e+07	1.83183e+07	3.97596e+07	1.97712e+07	1.37786e+07	3.58909e+07	5.28439e+07	4.15779e+07	4.03362e+07	4.37402e+07	6.48232e+07	1.55401e+07	1.39879e+07	4.43616e+07	1.01537e+07	3.81683e+07	1.45737e+07	5.00557e+07	5.18808e+07	6.01252e+07	3.90397e+07	4.41053e+07	1.48762e+07	5.15892e+07	4.05284e+07	4.03309e+07	3.50771e+07	3.5101e+07	4.06815e+07	2.48251e+07	3.97958e+07
M163T75	163.025	74.5	1.2	1.08733e+06	5.10869e+06	6.74612e+06	3.07785e+06	5.01038e+06	8.31469e+06	5.35356e+06	7.3263e+06	7.74777e+06	8.41493e+06	7.96938e+06	1.00909e+07	7.74097e+06	5.11533e+06	7.09144e+06	7.14556e+06	7.58758e+06	8.42045e+06	6.06474e+06	3.38711e+06	228500	7.74837e+06	9.88778e+06	8.24095e+06	5.97179e+06	6.00418e+06	6.50698e+06	5.99406e+06	4.76871e+06	5.12949e+06	4.08994e+06
M163T82_1	162.839	81.8	1.4	5.59682e+07	5.93655e+07	5.35236e+07	4.01734e+07	9.17419e+07	8.0995e+06	6.81191e+07	4.76083e+07	6.11461e+07	5.45234e+07	7.00292e+07	6.41096e+07	5.26327e+07	5.38339e+07	6.03798e+07	5.55003e+07	5.63511e+07	4.27315e+07	5.14965e+07	6.47343e+07	5.09146e+07	6.20436e+07	4.01442e+07	7.53038e+07	5.25406e+07	5.47869e+07	5.36246e+07	5.25379e+07	5.46658e+07	5.24785e+07	4.93904e+07
M163T82_2	163.025	82	1.4	1.49567e+06	762372	1.43035e+06	1.15111e+06	1.14574e+06	1.39277e+06	1.22191e+06	990150	984984	1.22616e+06	1.42882e+06	1.18397e+06	1.13119e+06	1.44022e+06	1.02202e+06	1.04844e+06	1.20717e+06	1.1835e+06	1.11871e+06	962691	1.2179e+06	1.27872e+06	1.08155e+06	737787	1.11879e+06	1.15479e+06	1.09777e+06	1.08953e+06	1.15013e+06	855734	1.15378e+06
M163T84	162.957	84.1	1.4	4.30963e+06	3.23286e+06	4.35855e+06	5.9701e+06	3.77115e+06	1.93607e+06	4.20867e+06	1.75387e+06	1.12366e+06	1.11944e+06	6.39753e+06	950448	1.17343e+07	1.44509e+06	1.43627e+06	5.70962e+06	4.85037e+06	3.12444e+06	1.60677e+06	5.06367e+06	5.54649e+06	4.24347e+06	3.76269e+06	578852	2.89245e+06	2.87361e+06	2.85982e+06	2.20782e+06	3.44506e+06	1.83653e+06	2.03542e+06
M163T89	163.025	89.5	1.5	2.21179e+06	2.06023e+06	4.02971e+06	1.97046e+06	1.74044e+06	1.36452e+06	3.27482e+06	4.28743e+06	972566	847028	1.69872e+06	711847	903590	886037	1.09889e+06	1.16979e+06	1.11196e+06	542244	1.49878e+06	5.61837e+06	1.25328e+06	1.23778e+06	515305	844074	1.79046e+06	1.76428e+06	1.79123e+06	1.74874e+06	1.91924e+06	1.79127e+06	1.76436e+06
M163T96	163.018	95.7	1.6	6.40301e+06	6.20664e+06	9.20092e+06	1.07833e+07	4.82549e+06	3.03339e+06	8.51001e+06	8.82979e+06	8.2033e+06	2.67799e+06	1.889e+07	7.64942e+06	1.66168e+06	9.28853e+06	6.39245e+06	5.55397e+06	4.53592e+06	7.76806e+06	1.24118e+07	1.25923e+07	2.5661e+06	7.28012e+06	2.57652e+06	6.59163e+06	6.55028e+06	6.61883e+06	6.9314e+06	6.94119e+06	6.96165e+06	8.23804e+06	6.62085e+06
M164T112	164.083	112	1.9	276519	184241	213820	147597	193218	105059	281284	364215	11172.7	92197.4	24791.9	7988.66	68634.6	24002.6	78655	16402.5	341469	54236.5	194386	181367	237976	18173.3	68673.2	11859.4	133035	135353	134842	141587	143560	127746	133001
M164T139	163.84	138.7	2.3	244444	151673	196555	206695	143355	132264	799735	388319	122986	258856	203194	232565	155773	212377	114553	266602	194943	154145	208849	106804	296665	254048	176668	192539	143437	146495	148443	147593	148826	144656	127861
M164T285	164.072	285.5	4.8	9.65124e+07	4.716e+07	3.91171e+08	1.29214e+08	2.08714e+08	1.59508e+08	1.59825e+08	1.54447e+08	2.85173e+08	1.37721e+08	2.39482e+08	1.94068e+08	6.20045e+08	2.96748e+08	1.59651e+08	2.22624e+08	1.77496e+08	3.91435e+08	8.5178e+08	2.61849e+08	7.01589e+08	3.6776e+08	2.93292e+08	2.48341e+08	1.80472e+08	1.72526e+08	1.94804e+08	1.89083e+08	1.37626e+08	1.88798e+08	1.89067e+08
M164T303_1	164.019	303.1	5.1	16587.8	22873	30582.1	101982	22782.5	14879.4	21660.6	47754.2	73737.2	70239.4	27528.9	98515.4	63443.8	30959	84897.9	110551	25079.4	49338	59730.9	27222.3	97459.1	110317	84920.5	59332.4	56366.4	57123	58333.9	70997.4	71588.3	71972.5	71368.2
M164T303_2	164.072	303.4	5.1	1.75932e+08	2.57541e+08	9.90728e+07	1.55319e+08	1.15681e+08	9.89229e+07	1.30756e+08	1.12683e+08	2.26973e+08	3.13228e+08	2.06712e+08	1.56088e+08	3.2285e+08	2.83961e+08	2.00513e+08	2.15132e+08	3.4702e+08	2.62475e+08	2.87506e+08	3.03173e+08	1.73815e+08	2.50189e+08	1.85354e+08	2.31917e+08	1.90011e+08	1.62767e+08	1.93261e+08	1.93256e+08	1.92206e+08	1.79586e+08	1.93256e+08
M164T303_3	164.127	303.1	5.1	113941	23387.6	192753	31677.8	92581.6	92357.6	159204	71404.9	126929	157722	104209	39115.9	38372.2	84074.5	91445.5	133287	52089.1	113602	71093.1	104273	69640.6	157183	124484	108580	57492.1	110431	60242.1	58615.5	86847.3	85960.7	54461.4
M164T349	164.035	349.1	5.8	2.51562e+06	2.64156e+06	2.06212e+06	2.69436e+06	2.10035e+06	1.62579e+06	812119	1.97307e+06	2.51311e+06	2.22798e+06	3.7029e+06	2.34396e+06	2.7476e+06	2.41445e+06	2.85946e+06	606775	857849	2.68509e+06	2.41668e+06	1.09744e+06	5.20251e+06	2.43473e+06	2.43905e+06	2.80049e+06	1.70604e+06	1.78757e+06	2.26515e+06	1.74579e+06	2.46248e+06	2.0219e+06	2.35546e+06
M164T498	164.07	498.1	8.3	4.48858e+06	552922	3.26675e+06	1.40205e+06	2.82053e+06	1.53795e+06	860972	1.63796e+06	3.04891e+06	3.23722e+06	1.14792e+06	3.52553e+06	514474	1.67208e+06	1.31446e+06	556465	2.71047e+06	2.85492e+06	2.41412e+06	3.39596e+06	1.61306e+06	3.64475e+06	1.91531e+06	3.03716e+06	2.6911e+06	2.85643e+06	2.85948e+06	2.69949e+06	2.86518e+06	1.78164e+06	2.88424e+06
M164T530	164.07	530.2	8.8	2.17154e+06	1.95288e+06	2.17616e+06	1.92201e+06	1.64969e+06	852963	839051	776001	1.29197e+06	539516	1.90448e+06	590720	644337	542136	1.14296e+06	1.16312e+06	605043	779449	681333	1.32802e+06	1.47011e+06	1.57896e+06	429092	1.4391e+06	1.46563e+06	1.30393e+06	1.30409e+06	978957	1.26124e+06	1.26033e+06	1.30601e+06
M164T542	164.07	541.9	9	1.1568e+06	2.40593e+06	2.12744e+06	1.73635e+06	1.23103e+06	4.07974e+06	163460	962159	1.5696e+06	129916	3.17941e+06	319483	2.0474e+06	1.79758e+06	1.43528e+06	3.40989e+06	1.27709e+06	2.62642e+06	1.65872e+06	1.43258e+06	2.43596e+06	1.10826e+06	1.27909e+06	577013	1.58259e+06	1.85995e+06	1.26316e+06	1.57801e+06	1.2119e+06	1.38793e+06	1.68182e+06
M164T568	164.07	568.5	9.5	2.73831e+06	2.3393e+06	1.70109e+06	154621	2.00918e+06	2.71439e+06	3.25356e+06	252810	2.12609e+06	1.94908e+06	826190	1.19148e+06	4.6324e+06	2.46076e+06	898849	1.63352e+06	2.16502e+06	715267	1.12895e+06	2.81567e+06	1.00666e+06	758809	3.04677e+06	3.37481e+06	1.85059e+06	1.84954e+06	1.61465e+06	1.84871e+06	1.47641e+06	1.48303e+06	1.85175e+06
M164T589	164.07	589.5	9.8	2.43061e+06	2.37377e+06	1.94533e+06	1.5206e+06	1.52102e+06	1.13189e+06	1.36696e+06	3.05844e+06	522376	1.12262e+06	2.02284e+06	1.47249e+06	1.14526e+06	1.52009e+06	1.5291e+06	527370	1.51447e+06	807393	876614	914204	1.18105e+06	1.73679e+06	993839	1.56902e+06	1.32467e+06	1.56471e+06	1.24101e+06	1.24065e+06	1.31823e+06	1.3159e+06	1.24835e+06
M164T631	164.07	630.9	10.5	1.45434e+06	1.00539e+06	478318	4.80699e+06	2.01131e+06	1.70082e+06	112033	1.06559e+06	1.71441e+06	8.54909e+06	127619	795288	459461	93564.8	406690	504461	123992	627217	2.79687e+06	50209.4	1.3503e+06	3.5852e+06	482871	693299	1.81059e+06	1.83319e+06	1.81005e+06	1.8129e+06	1.66668e+06	1.76192e+06	1.6399e+06
M164T666	164.069	666	11.1	573111	1.36202e+06	1.04956e+06	923662	388315	544271	418199	1.06081e+06	1.50757e+06	3.0979e+06	2.10586e+06	2.56207e+06	574874	3.20093e+06	1.94413e+06	1.97601e+06	1.58262e+06	1.48716e+06	816580	551874	1.47065e+06	1.11232e+06	2.31518e+06	3.53431e+06	1.44818e+06	1.61824e+06	1.26791e+06	1.45369e+06	1.49406e+06	1.4555e+06	1.50834e+06
M164T679	164.069	679.1	11.3	5.76218e+06	3.7408e+06	6.99124e+06	2.70267e+06	3.27028e+06	6.12128e+06	1.36167e+06	2.54721e+06	9.97944e+06	1.50108e+06	1.61747e+06	1.24523e+06	1.97708e+06	4.24286e+06	2.23717e+06	6.02317e+06	4.76484e+06	1.27703e+06	3.80164e+06	6.9177e+06	3.49327e+06	8.11847e+06	3.01219e+06	2.17802e+06	1.51693e+06	1.46607e+06	1.66678e+06	1.56061e+06	2.36685e+06	1.5075e+06	2.5704e+06
M164T758	164.07	758.3	12.6	1.54718e+06	3.15082e+06	1.3365e+06	2.6477e+06	3.12853e+06	1.30833e+06	1.47149e+06	1.3299e+06	4.26999e+06	1.78359e+06	1.16042e+06	761334	3.0882e+06	1.58463e+06	1.16318e+06	438270	776739	3.62831e+06	2.68838e+06	1.69778e+06	708742	609638	3.28842e+06	3.49533e+06	1.80896e+06	2.16983e+06	946828	1.95364e+06	1.95548e+06	1.95278e+06	1.95631e+06
M164T82	163.839	81.8	1.4	1.01713e+06	860275	991431	983406	730288	846123	827972	799359	1.33919e+06	919576	1.00267e+06	1.00403e+06	1.15195e+06	996315	1.22864e+06	1.11657e+06	1.57298e+06	1.66497e+06	1.83807e+06	1.22212e+06	1.38599e+06	1.45331e+06	2.3586e+06	1.28632e+06	1.15021e+06	1.17329e+06	1.20236e+06	1.22694e+06	1.17746e+06	1.16749e+06	1.1667e+06
M164T83	163.991	83.5	1.4	1.33338e+06	1.43959e+06	1.44266e+06	1.11877e+06	933671	804577	1.45807e+06	1.79441e+06	1.61481e+06	1.20346e+06	816966	598640	1.12045e+06	926911	1.00061e+06	1.06833e+06	1.24205e+06	1.39724e+06	1.96359e+06	1.89008e+06	1.5217e+06	1.3144e+06	1.36586e+06	1.55443e+06	1.019e+06	900456	1.0685e+06	1.11534e+06	1.11133e+06	1.19423e+06	1.11171e+06
M164T91	164.039	90.5	1.5	9.62595e+06	5.65676e+06	1.19158e+07	6.14591e+06	9.59903e+06	8.52486e+06	1.53996e+07	1.35189e+07	1.69476e+07	2.07042e+07	1.94091e+07	1.28059e+07	9.79636e+06	1.4673e+07	1.23504e+07	1.26127e+07	9.99526e+06	2.07016e+06	1.13993e+07	1.70035e+07	1.35787e+07	1.97485e+07	1.41301e+07	7.08991e+06	1.1239e+07	1.1461e+07	1.28472e+07	1.15189e+07	1.13178e+07	1.12352e+07	1.12371e+07
M165T106	164.986	106.2	1.8	193996	163193	163213	154317	130398	128028	179007	169645	229437	200077	209224	210808	153186	151667	257401	177339	202859	154420	202939	184083	206773	219302	149929	153485	169307	164842	169749	169360	184297	212657	175160
M165T141	164.836	141.1	2.4	1.54676e+06	2.37887e+06	1.24779e+06	2.12684e+06	1.39039e+06	1.27363e+06	1.34616e+06	999197	362547	267954	321915	203511	255230	221189	150068	172110	856411	471683	1.33516e+06	1.31039e+06	1.02215e+06	279979	364378	468767	882299	882819	868984	768391	882691	879060	882619
M165T284	165.076	284.3	4.7	1.09861e+07	3.02939e+07	1.53933e+07	1.01079e+07	1.18111e+07	5.18589e+06	1.25367e+07	1.0162e+07	1.34678e+07	3.78529e+07	4.16143e+07	4.04535e+06	1.22934e+07	3.97171e+07	8.61775e+06	7.57268e+06	2.40104e+07	1.74503e+07	1.81918e+07	2.25988e+07	1.7278e+07	5.50297e+07	1.25401e+07	1.10323e+07	1.75591e+07	1.60863e+07	1.61873e+07	1.26235e+07	1.77052e+07	1.92442e+07	1.61241e+07
M165T303	165.076	303.4	5.1	2.47507e+07	2.80963e+07	1.45967e+07	7.85186e+06	1.38976e+07	1.43951e+07	1.64375e+07	1.61266e+07	2.69433e+07	4.58471e+07	1.98958e+07	1.47764e+07	2.67806e+07	1.66109e+07	1.98827e+07	2.03154e+07	1.18434e+07	1.40522e+07	4.18222e+07	4.01698e+07	1.88437e+07	2.62473e+07	9.73302e+06	2.29279e+07	1.94965e+07	2.17969e+07	1.84938e+07	1.26459e+07	1.8526e+07	1.94474e+07	1.6315e+07
M165T31	164.927	31.5	0.5	70034.3	61398.6	91821.7	54576.9	58345.5	60261.2	44571.6	45329.5	85309.5	85327.8	95857.8	67451.4	75675.6	51042.3	80402.2	69037.3	72500.7	82290.7	72168.3	61231.1	72738.7	60773.5	75058.2	73834.3	64526.8	68611.5	70454.2	68898.2	67950.8	63833.4	68877.5
M165T344	165.056	343.9	5.7	1.7061e+06	1.68199e+06	1.51763e+06	1.72987e+06	1.90231e+06	1.68114e+06	1.8359e+06	1.7844e+06	3.12915e+06	3.54771e+06	2.55957e+06	3.0443e+06	3.14074e+06	3.1504e+06	3.44592e+06	3.19962e+06	1.99873e+06	3.17074e+06	2.2331e+06	1.92829e+06	2.1114e+06	1.62261e+06	1.82414e+06	2.02195e+06	1.21672e+06	1.3367e+06	1.33688e+06	1.33712e+06	1.40332e+06	1.30917e+06	1.30951e+06
M165T365	165.067	364.7	6.1	976981	1.42329e+06	198730	762446	1.18478e+06	115419	1.31099e+06	527515	953242	1.34352e+06	1.19345e+06	1.58574e+06	1.40846e+06	1.03422e+06	1.01937e+06	1.28036e+06	1.08114e+06	1.01652e+06	1.15189e+06	1.53074e+06	734019	209005	898265	1.36728e+06	1.04756e+06	1.20835e+06	774239	1.06012e+06	1.3215e+06	1.06551e+06	1.32592e+06
M165T374	165.021	374	6.2	2.09299e+06	596685	671493	700665	1.75233e+06	2.56046e+06	1.89248e+06	2.50047e+06	2.01468e+06	2.73521e+06	2.91899e+06	2.64697e+06	5.06811e+06	2.4782e+06	2.56768e+06	2.64488e+06	2.50705e+06	4.10188e+06	2.65163e+06	1.59727e+06	2.76291e+06	1.97396e+06	1.80168e+06	2.14881e+06	2.43624e+06	2.02805e+06	2.51771e+06	2.56468e+06	2.51816e+06	2.30717e+06	2.51696e+06
M165T385	164.836	385.1	6.4	1.90181e+06	1.41351e+06	1.58623e+06	1.75942e+06	1.94794e+06	1.93739e+06	1.76356e+06	1.99491e+06	2.19578e+06	2.3308e+06	2.08298e+06	2.01872e+06	2.34297e+06	2.36525e+06	2.20696e+06	2.02154e+06	1.63763e+06	2.22454e+06	1.93212e+06	2.01462e+06	2.06901e+06	1.85623e+06	1.8432e+06	1.80144e+06	1.85335e+06	1.84177e+06	1.84098e+06	1.892e+06	1.89011e+06	1.95715e+06	1.78305e+06
M165T550	164.951	550	9.2	539088	1.05793e+06	986402	1.22257e+06	840307	355408	80313.4	342297	345250	714425	812867	521813	310281	475061	341975	350269	980311	298272	740095	634894	362661	328539	437768	184336	353383	602818	398418	353663	349691	348315	347652
M165T593	165.092	592.9	9.9	428070	427880	227787	289558	392371	328582	217743	190863	178667	315609	230485	234683	195947	232310	89458.9	247993	286666	176523	182489	275379	298680	340203	221741	185774	236824	237255	247598	268126	235847	237837	298826
M165T602	165.128	602.3	10	12121.5	17535.9	13858.7	144516	147017	12000.6	51041.7	17279	99430.7	105299	45815.9	53070.1	168263	113742	146922	92709.1	119082	219488	164644	13357	317532	34808.8	259577	256913	158578	157912	130573	94430.5	158135	158205	158389
M165T615	165.092	614.8	10.2	506602	516541	517428	310789	464898	397925	499252	468650	368476	434201	258810	441312	321492	397066	255956	580396	361608	184445	455177	303056	387305	289747	563356	424622	248648	436467	436774	436744	436622	417403	417325
M165T627	165.092	627.3	10.5	67880.8	112704	105806	28024.8	77237.6	25705.3	670777	97467.8	499439	621472	297102	743467	427283	333857	136920	378984	218719	164516	547371	475218	124451	191258	120331	329191	244074	247706	245694	186501	348263	198981	197387
M165T654	164.835	654.5	10.9	1.64732e+07	5.78987e+07	2.97976e+07	2.34782e+07	5.13329e+07	4.61023e+07	7.54886e+07	7.61942e+07	3.39992e+07	2.36677e+07	8.44074e+06	1.54713e+07	2.35512e+07	3.556e+07	3.94413e+07	1.92804e+07	4.52888e+07	5.51119e+07	4.12699e+07	2.81728e+07	3.583e+07	6.19149e+07	2.07408e+07	6.27112e+07	3.42223e+07	3.44068e+07	3.43221e+07	4.98199e+07	3.44043e+07	3.93251e+07	3.94938e+07
M165T679	165.056	678.8	11.3	7.94815e+06	1.64432e+07	5.69121e+06	1.46395e+07	9.21188e+06	2.18137e+06	6.67255e+06	5.34867e+06	2.71179e+07	2.94645e+07	3.91832e+07	2.07577e+07	2.73186e+07	2.53033e+07	3.38947e+07	2.66223e+07	1.24594e+07	5.95466e+07	1.55845e+07	6.27938e+06	1.95512e+07	2.72821e+07	3.60062e+07	3.25454e+07	1.56597e+07	1.38301e+07	1.32711e+07	1.79425e+07	1.56531e+07	1.52157e+07	1.54582e+07
M165T698	164.836	697.7	11.6	8.52538e+06	2.50876e+06	8.13631e+06	2.23123e+06	2.42968e+06	1.23878e+06	8.74719e+06	2.42857e+06	1.35483e+07	8.63177e+06	1.2579e+07	8.10819e+06	3.67099e+06	1.05385e+07	9.93911e+06	1.06329e+07	2.01229e+07	1.07073e+07	2.19856e+07	3.0447e+07	3.00728e+07	1.40127e+07	1.79801e+07	1.21414e+07	1.51214e+07	1.09342e+07	1.0306e+07	1.17159e+07	1.03473e+07	1.0923e+07	8.92139e+06
M165T718	164.836	718.1	12	7.57703e+06	2.20228e+06	8.3257e+06	6.23691e+06	2.45854e+07	9.63042e+06	1.19784e+07	1.11197e+07	6.90723e+06	1.1498e+07	7.43133e+06	1.31877e+07	2.35614e+07	1.11578e+07	1.53294e+07	1.37558e+07	1.34606e+07	1.0128e+07	1.22945e+07	4.70743e+06	6.99219e+06	7.22719e+06	1.07781e+07	6.35581e+06	8.15534e+06	1.07078e+07	1.1206e+07	1.0696e+07	1.21426e+07	1.11137e+07	1.00877e+07
M165T72	165.041	72.5	1.2	2.68128e+07	8.2131e+06	2.40769e+07	3.8156e+07	2.16672e+07	2.26116e+07	2.5974e+07	1.05964e+07	3.01288e+07	8.03985e+06	2.98588e+07	5.02767e+06	9.95522e+06	1.11428e+07	9.83333e+06	1.00244e+07	5.77773e+07	1.36045e+07	1.07679e+07	1.24111e+07	3.31734e+07	2.6395e+07	1.35398e+07	9.22017e+06	1.31429e+07	1.17203e+07	1.51539e+07	1.62364e+07	1.33342e+07	1.42667e+07	2.27683e+07
M165T731	165.092	730.8	12.2	81947.4	371645	340438	244869	438324	340856	381412	651377	107149	145276	344523	328860	178382	382629	471411	245895	410969	607403	583277	269358	477307	461973	292530	394463	372350	371494	371283	359480	341480	322066	377890
M165T749	164.836	748.8	12.5	1.86883e+06	2.42172e+06	1.35816e+06	2.03397e+06	3.69459e+06	2.13816e+06	2.36114e+06	3.08738e+06	1.9581e+06	2.68505e+06	2.13989e+06	2.76812e+06	2.73403e+06	2.81428e+06	2.80867e+06	3.055e+06	2.56311e+06	2.97374e+06	2.63524e+06	951048	2.00268e+06	2.54375e+06	3.01084e+06	2.0161e+06	2.34221e+06	2.25994e+06	1.85188e+06	2.3471e+06	2.32032e+06	1.36031e+06	2.31293e+06
M165T798	165.019	798.2	13.3	2.86149e+06	1.75128e+06	3.74666e+06	3.96955e+06	3.03295e+06	2.87929e+06	3.67718e+06	4.3463e+06	3.02331e+06	4.02839e+06	3.777e+06	4.89308e+06	5.96509e+06	2.68625e+06	2.69092e+06	3.8984e+06	2.21765e+06	4.2533e+06	4.39963e+06	3.4542e+06	3.30135e+06	4.57116e+06	4.29643e+06	3.40843e+06	3.42782e+06	3.4535e+06	3.70934e+06	3.7366e+06	1.08393e+06	3.41698e+06	3.70992e+06
M165T82_1	164.836	81.8	1.4	2.61634e+07	1.49992e+07	1.48152e+07	1.40864e+07	2.65165e+07	8.76943e+06	1.34047e+07	6.76051e+06	7.79787e+06	1.74109e+07	1.0836e+07	1.23436e+07	1.52914e+07	1.25104e+06	1.81961e+07	6.74688e+06	2.46429e+07	8.60404e+06	1.30532e+07	1.63014e+07	8.83224e+06	1.55039e+07	8.90987e+06	1.90434e+07	1.77942e+07	1.58975e+07	1.80002e+07	1.44566e+07	1.77799e+07	1.78674e+07	1.7077e+07
M165T83	164.957	83.3	1.4	1.39337e+06	1.58171e+06	1.44846e+06	1.63961e+06	1.53753e+06	1.21576e+06	1.52804e+06	1.74121e+06	1.35278e+06	1.23174e+06	1.18989e+06	1.09963e+06	1.18775e+06	1.48061e+06	1.26128e+06	1.25936e+06	1.00359e+06	1.12843e+06	1.19136e+06	1.0965e+06	1.16638e+06	1.02811e+06	1.16258e+06	1.06114e+06	1.26374e+06	1.26057e+06	1.2158e+06	1.26368e+06	1.26423e+06	1.2636e+06	1.20154e+06
M165T96	165.041	95.9	1.6	1.97216e+07	1.8587e+07	1.40577e+07	1.96528e+07	1.8093e+07	5.6754e+06	1.79892e+07	1.51162e+07	290854	611064	286051	417664	43155.9	152354	465611	118915	1.06617e+07	81429.7	4.89185e+06	1.06024e+07	5.99123e+06	478819	295124	1.08859e+06	3.74182e+06	5.05908e+06	5.6547e+06	2.33702e+06	5.64983e+06	5.48303e+06	6.72396e+06
M166T108	166.023	108	1.8	268344	467923	328607	621539	171423	235034	168422	115989	188473	553003	21008.5	331998	252104	212685	439928	491577	139702	471220	311954	492734	77755	134037	85944	327207	261698	261690	253440	265423	261749	286637	265481
M166T109	166.051	109	1.8	1.83643e+06	2.49735e+06	2.27978e+06	1.49539e+06	2.7554e+06	1.94659e+06	2.41902e+06	1.67821e+06	1.67113e+06	1.68448e+06	1.75302e+06	2.28571e+06	1.72911e+06	1.79224e+06	1.7549e+06	1.64254e+06	1.60965e+06	1.05811e+06	1.21257e+06	1.65669e+06	1.36713e+06	1.48941e+06	1.27682e+06	859884	1.65511e+06	1.65648e+06	1.93592e+06	1.69954e+06	1.69737e+06	1.65479e+06	1.65779e+06
M166T114	165.964	113.7	1.9	49152.8	21399.5	43960.6	27737.1	65888.7	12427.8	12803.8	15770.5	13187.3	21353.2	12254.5	49692.7	66790.2	25392.8	52018.2	13228.1	92204.6	45522.5	36266.9	72938.1	90586.7	36279.2	15094.7	66761.2	58567.2	63010.7	58875.5	63071.1	74956.8	27654.5	58266.8
M166T119	166.018	119	2	502337	205045	459773	544355	199904	176070	279208	366695	362780	1.34093e+06	676763	1.01134e+06	726803	1.38814e+06	1.80872e+06	1.7454e+06	906191	293734	929118	446946	758265	327436	410813	659794	521952	619666	635537	627995	635765	619940	684688
M166T284	166.076	284.1	4.7	367668	831706	537291	981737	322784	719622	463869	535661	475581	349058	568865	452060	240057	414362	429817	341537	833057	267590	626483	417749	564000	498752	537894	418949	465076	466097	466792	469842	530611	521431	603723
M166T303	166.076	303.4	5.1	185912	261747	198732	397018	165605	199401	178031	159045	741790	604717	829980	550889	572781	1.10808e+06	1.09947e+06	1.13072e+06	459770	580002	473967	444871	358448	661803	651146	372823	569466	517821	503416	518466	518000	502778	441169
M166T304	166.099	304.1	5.1	43998.3	74547.9	61912.7	59170.7	54546.5	39889.1	59443.2	57317.9	185351	61818	246476	358854	169963	327382	328690	318436	211401	164985	170930	142560	174959	269167	203623	172763	140276	154766	149878	138647	149707	156277	170652
M166T433	165.986	432.8	7.2	1.4951e+06	3.27931e+06	3.74465e+06	5.05115e+06	2.19175e+06	1.84526e+06	3.00921e+06	4.41645e+06	503103	1.27238e+06	1.52537e+06	1.29019e+06	1.31502e+06	1.95206e+06	1.3423e+06	1.96111e+06	1.20722e+06	231652	452210	1.18792e+06	1.84515e+06	1.10217e+06	874874	1.06698e+06	2.00047e+06	1.89081e+06	1.88976e+06	1.82477e+06	1.89322e+06	1.82608e+06	1.56564e+06
M166T549	166.087	549.1	9.2	103061	91597.7	94408.4	102106	122232	104589	101436	82099.9	205310	244135	258663	228533	196084	317916	257630	253012	197669	65155.8	186841	180039	202902	69305.9	203958	269329	158273	157746	158288	167213	161569	160076	161589
M166T672	165.979	672.1	11.2	222926	542378	363362	139620	525159	217257	459139	216426	461610	370154	232841	457512	455821	326726	174974	230171	320050	150326	325204	166191	217568	205491	109771	519466	340680	332614	333631	427933	372198	344416	344115
M166T679	166.059	678.8	11.3	2.13405e+06	2.23301e+06	2.53183e+06	3.0765e+06	2.8141e+06	1.38221e+06	3.0804e+06	1.98691e+06	5.21395e+06	3.48962e+06	3.23587e+06	3.29583e+06	1.10259e+06	2.46407e+06	2.6291e+06	3.29163e+06	2.12716e+06	1.40317e+06	3.26711e+06	3.39637e+06	1.93131e+06	4.08447e+06	6.2989e+06	4.19309e+06	1.37532e+06	652409	1.42185e+06	1.35775e+06	1.60871e+06	1.6295e+06	1.50311e+06
M166T692	166.016	691.7	11.5	66265.1	172224	257633	79554.7	131825	55955.4	155583	178412	73728.5	82250.3	239878	135202	183979	150303	131967	248583	191252	108099	1.18321e+07	271246	99625.6	17376	139163	128236	135051	173963	143722	174135	173754	145469	173794
M166T738	166.051	738.2	12.3	6.07848e+06	1.5774e+07	1.06523e+06	1.52386e+06	1.93736e+06	1.03163e+06	1.56734e+06	1.48958e+06	2.48126e+06	3.94683e+06	1.79449e+06	2.09277e+06	6.71369e+06	1.94395e+06	2.80258e+06	2.14103e+06	1.65972e+06	1.88324e+06	5.38585e+06	9.38163e+06	1.86917e+06	1.91698e+06	2.15166e+06	1.82896e+06	2.0557e+06	2.0671e+06	2.05569e+06	2.09572e+06	1.77132e+06	2.26409e+06	2.0956e+06
M166T82	166.044	81.5	1.4	3.10321e+07	4.56401e+07	2.17801e+07	4.51764e+07	2.51708e+07	2.18586e+07	1.79284e+07	2.65538e+07	2.80916e+07	3.08725e+07	3.44719e+07	2.97272e+07	2.88856e+07	2.16311e+07	2.8365e+07	2.60001e+07	3.06128e+07	3.93059e+07	4.11466e+07	2.85313e+07	3.50807e+07	2.22219e+07	3.73742e+07	4.87091e+07	2.85182e+07	2.88798e+07	2.86878e+07	2.85179e+07	2.82489e+07	2.86894e+07	2.85166e+07
M166T98	166.018	98.3	1.6	2.49238e+08	2.01442e+08	1.87405e+08	1.7258e+08	1.44607e+08	1.11879e+08	2.22204e+08	2.26084e+08	2.59303e+08	3.11e+08	3.28721e+08	2.09646e+08	2.38561e+08	2.71818e+08	2.4799e+08	2.52139e+08	2.73345e+08	2.76105e+08	2.56076e+08	2.77325e+08	3.09298e+08	1.81748e+08	2.37027e+08	3.33201e+08	2.26957e+08	2.23628e+08	2.23623e+08	2.24917e+08	2.2955e+08	2.2275e+08	2.23605e+08
M167T108	167.046	108.2	1.8	846300	837306	680360	600494	555468	595313	701606	556941	679432	615577	403654	493979	653380	329999	632086	425229	686699	685257	747269	723438	777747	558664	914572	669280	525133	660280	656304	627905	706487	632297	631407
M167T368	166.833	368.5	6.1	1651.48	333.494	11645.7	11064	2732.96	215.503	1952.21	2901.35	28854	37486.6	22042.1	32919.6	34011.6	47542.5	34358.8	34299.3	26561.9	41482.6	28075.6	21165.6	30781.8	29410.1	27474.5	28237.6	23309.3	23320.6	20637.2	23302.5	23316.8	25025.6	21148.1
M167T380	167.083	380	6.3	565582	1.29399e+06	178436	934680	161820	733977	147531	223886	632371	621571	509733	365625	83897.6	131787	357889	131175	67385	604721	95243.1	750602	455399	587957	97157.7	226298	495639	526652	565305	480943	204015	527969	528246
M167T521	167.083	521.5	8.7	136560	174159	148487	91700.2	53072.3	85787.1	115061	140026	88020.8	104675	104540	94442.9	55174.4	120590	51162.3	120226	119032	70553.4	52583	95064	68369.1	103530	86215.9	89885.2	92954.8	96053.1	95924.5	59600.2	96003.6	87509.5	102029
M167T588	166.994	588	9.8	527732	829564	1.80854e+06	1.9307e+06	271320	313544	337022	611910	2.09189e+06	2.98995e+06	1.88263e+06	2.19912e+06	159082	2.20829e+06	4.03773e+06	5.12861e+06	744813	137979	561854	1.19307e+06	1.61762e+06	724301	769772	882094	797297	796328	839736	376045	839118	981309	797486
M167T655	167.144	654.9	10.9	16850.2	25708	67120.3	37368.7	68072.8	58241.3	239584	47246.5	255744	193468	564368	255774	856134	338584	84090.1	67761.7	41929.5	133731	194763	436752	193325	273308	360415	97148.4	213814	216236	157228	208764	211154	264685	232254
M167T698	166.833	698.1	11.6	965006	1.30344e+06	705854	1.07763e+06	928338	1.53507e+06	1.55267e+06	1.92538e+06	648942	1.73438e+06	686630	783941	1.9273e+06	2.14722e+06	2.56687e+06	652413	611655	1.08516e+06	690820	1.85684e+06	2.21633e+06	1.69652e+06	1.10914e+06	1.47207e+06	1.35117e+06	1.6269e+06	1.33016e+06	1.6123e+06	1.6065e+06	973244	1.93709e+06
M167T722	166.994	721.7	12	588190	1.67292e+06	1.23626e+06	422363	1.83521e+06	449381	1.18891e+06	1.20612e+06	1.08565e+06	989010	961503	977593	502379	1.36869e+06	864415	996935	955760	1.17018e+06	664528	766014	994863	374431	1.11199e+06	1.47923e+06	1.05126e+06	1.12992e+06	1.15032e+06	1.18143e+06	1.08923e+06	1.09056e+06	888564
M167T765	166.994	765.4	12.8	1.28168e+07	8.8402e+06	9.47997e+06	5.21633e+06	7.22352e+06	7.22896e+06	6.89333e+06	1.07281e+07	4.68336e+06	1.68333e+07	9.23289e+06	9.87191e+06	5.27239e+06	6.56373e+06	5.56474e+06	7.71712e+06	1.18313e+07	1.91071e+07	1.01723e+07	1.02046e+07	7.55395e+06	9.06412e+06	5.30266e+06	1.32004e+07	1.14529e+07	8.69359e+06	8.66688e+06	9.17358e+06	9.1685e+06	9.26405e+06	7.10745e+06
M167T82_1	166.833	81.8	1.4	2.21956e+06	1.41588e+06	1.19155e+06	1.79766e+06	2.61473e+06	377040	1.5579e+06	241848	531146	1.19373e+06	1.25059e+06	1.90967e+06	1.41691e+06	796690	1.23533e+06	356924	2.99843e+06	1.10429e+06	1.06072e+06	1.75989e+06	442098	1.56475e+06	754479	2.47697e+06	1.65642e+06	1.71159e+06	1.75957e+06	1.68978e+06	1.9067e+06	1.64507e+06	1.76508e+06
M167T82_2	166.861	82.5	1.4	2.46498e+06	2.18693e+06	2.85572e+06	2.24978e+06	726428	479503	2.0017e+06	2.53481e+06	2.3982e+06	2.12507e+06	2.85523e+06	418530	2.55189e+06	1.85359e+06	1.87865e+06	1.98253e+06	1.86113e+06	4.515e+06	3.67329e+06	2.96148e+06	3.04306e+06	4.09705e+06	4.29388e+06	5.28936e+06	2.15448e+06	2.1557e+06	2.15546e+06	2.15881e+06	1.44846e+06	2.15748e+06	1.00871e+06
M167T98	167.021	98.4	1.6	4.30093e+07	1.20194e+07	5.75143e+07	7.24102e+07	3.90505e+07	6.28567e+07	8.35107e+07	9.51072e+07	6.44325e+07	9.64281e+07	4.92097e+07	9.90236e+07	8.00368e+07	6.94108e+07	1.2983e+07	3.02198e+07	5.61841e+07	9.40526e+07	1.18176e+07	8.01012e+07	9.90619e+07	3.10546e+07	9.0588e+07	8.22627e+07	7.05886e+07	1.00596e+08	6.67026e+07	8.97783e+07	8.96021e+07	8.95743e+07	8.40559e+07
M168T100_1	168.067	99.8	1.7	513167	692301	720975	645545	450699	382995	556473	570489	624034	640816	633325	551353	647382	699897	631182	606191	690675	788609	642306	624968	684387	579828	513734	680673	574615	632645	574623	584239	600257	574538	581124
M168T100_2	168.078	100.3	1.7	4.0798e+06	2.14383e+06	9.43017e+06	2.03257e+06	3.16769e+06	5.23114e+06	2.677e+06	2.59564e+06	4.88382e+06	908057	4.98465e+06	4.17478e+06	6.06543e+06	1.93196e+06	5.38279e+06	6.90483e+06	2.45417e+06	6.66161e+06	3.54232e+06	3.85195e+06	3.1698e+06	4.24725e+06	1.23378e+06	6.93234e+06	3.40978e+06	2.05739e+06	4.07701e+06	4.09456e+06	4.07192e+06	3.36168e+06	4.07502e+06
M168T106	167.979	106.1	1.8	817564	2.32468e+06	251828	501006	4.07608e+06	8.44715e+06	1.50475e+06	479125	1.57187e+06	6.11262e+06	6.46063e+06	1.57953e+06	5.24921e+06	486029	248609	2.14166e+06	466422	3.6356e+06	2.75194e+06	1.8983e+06	3.71588e+06	1.21859e+06	6.31164e+06	6.34945e+06	2.03782e+06	2.16619e+06	3.12921e+06	2.14616e+06	4.20652e+06	2.72814e+06	2.16407e+06
M168T111	168.053	111.1	1.9	226929	189216	141994	80415.6	168775	146257	181101	154505	170171	152243	51409.3	138659	109096	266609	178174	77015	163038	157638	176870	354554	176417	256715	246953	249424	146483	146121	146382	144789	149287	118294	84795.8
M168T121	167.979	121.4	2	809113	653441	452117	829291	626034	481978	851130	611823	1.44011e+06	668571	2.18447e+06	4.43676e+06	2.44678e+06	3.25929e+06	4.45075e+06	6.19185e+06	1.36269e+06	2.9338e+06	981491	208275	898153	1.17727e+06	1.75561e+06	598379	1.95478e+06	1.61672e+06	1.54066e+06	1.57993e+06	1.61782e+06	1.58096e+06	1.72006e+06
M168T33	167.837	32.6	0.5	34143.2	41678	33224.3	53053.3	31813.6	33538.5	38400.3	43348.8	78857.8	100382	57430.5	45661.7	34082.9	58578.6	47925.9	53034.9	36430.2	38636.6	43235.5	45043.5	48611.3	42212.5	52092.1	83274.3	46730.2	48150	45654.3	45836.6	45751	65273.6	45698.9
M168T346	168.103	345.9	5.8	185919	173438	178864	198243	196359	220900	157753	138440	156575	125368	106715	159704	126207	103257	134252	140374	145782	122270	189036	142359	130108	174618	170982	81239.7	153327	157339	166513	154807	161625	157305	164547
M168T380	168.086	380.1	6.3	74595.5	529296	11319.5	10745.7	1140.68	7547.39	26208	12037	260.898	16314.7	796.118	844.464	19769.3	2298.36	4201.54	2299.98	611.44	65.9951	100857	169131	622.16	416.316	257.307	3432.08	28300.7	17500.9	37076.6	31636	31345.6	22749.5	31673.2
M168T443	168.103	443.1	7.4	77833.5	80703.1	150556	180266	154345	168274	83048.4	117610	91349.7	75989.3	185127	74966.2	149471	55946.8	138842	128769	179289	129464	144468	115787	175051	124015	239379	92600.3	176916	121033	149328	154666	166344	101735	137367
M168T474	168.103	473.7	7.9	770583	753052	900454	1.06717e+06	910246	611620	711792	980847	662275	1.78554e+06	931992	599719	288495	708408	1.53402e+06	1.75124e+06	892057	315099	917235	881069	1.0521e+06	491634	731249	614247	700515	775394	761287	756398	802913	663922	664726
M168T624	168.03	624.4	10.4	22741.1	175267	213083	225085	102706	295805	47084.8	174152	476194	979558	116094	63426.5	1.59307e+06	412216	780854	89815.5	791663	3.08436e+06	978076	111294	229806	554439	392662	1.04256e+06	646340	491946	251075	498422	509593	551365	603937
M168T720	168.139	719.6	12	429359	652870	749551	1.0628e+06	424811	776635	516390	752756	411604	739043	467686	1.0457e+06	430307	516158	478843	561026	1.12404e+06	379018	419095	513543	603038	390922	566855	413177	596688	706601	708721	776577	561535	566660	565324
M168T81	168.043	81.1	1.4	4.1632e+07	4.3912e+07	4.30199e+07	4.36519e+07	4.32798e+07	4.13643e+07	4.16345e+07	4.11179e+07	4.47029e+07	4.45803e+07	4.33345e+07	4.54942e+07	4.29076e+07	4.40221e+07	4.93726e+07	4.35984e+07	4.25934e+07	4.46032e+07	5.50443e+07	4.83919e+07	4.63376e+07	4.76386e+07	4.75754e+07	4.44966e+07	4.30227e+07	4.33551e+07	4.35812e+07	4.30244e+07	4.41558e+07	4.30201e+07	4.24992e+07
M168T82	168.028	82.1	1.4	2.82765e+06	2.10047e+06	2.60974e+06	1.24183e+06	1.56988e+06	1.30189e+06	1.35044e+06	1.67439e+06	4.26816e+06	2.22799e+06	1.61195e+06	4.02787e+06	2.21873e+06	1.93517e+06	2.96384e+06	2.08715e+06	1.47727e+06	1.29099e+06	1.72469e+06	1.52177e+06	1.5017e+06	2.38556e+06	1.29893e+06	3.39466e+06	1.98956e+06	1.93606e+06	2.00866e+06	1.5843e+06	1.99065e+06	1.90639e+06	1.90888e+06
M168T98	168.014	98.3	1.6	6.7788e+06	2.10795e+07	5.90219e+06	1.92159e+07	8.53692e+06	6.33782e+06	5.13577e+06	3.19325e+06	1.0963e+07	5.68635e+06	1.28867e+07	9.49789e+06	1.17546e+07	3.9231e+06	7.93494e+06	4.1879e+06	8.67148e+06	1.14092e+07	8.74133e+06	6.6509e+06	2.73131e+06	6.7903e+06	1.50767e+07	1.01589e+07	9.17699e+06	9.45574e+06	9.61492e+06	9.41294e+06	9.76671e+06	9.7744e+06	9.91339e+06
M168T99	168.025	98.6	1.6	3.40222e+06	3.26797e+06	3.42747e+06	2.60821e+06	3.07829e+06	1.62701e+06	4.51243e+06	4.12118e+06	3.63939e+06	7.91063e+06	4.26783e+06	2.82985e+06	5.93801e+06	5.76796e+06	7.9074e+06	6.94755e+06	5.04557e+06	1.27125e+07	7.51839e+06	8.64436e+06	8.9841e+06	1.92218e+06	3.71798e+06	4.2688e+06	4.54649e+06	4.54426e+06	4.35565e+06	4.48326e+06	2.76173e+06	4.54479e+06	4.54111e+06
M169T101_1	169.062	100.9	1.7	543259	415080	133447	101538	519924	146943	519937	98173.2	254696	319394	185081	176464	264211	259156	234073	228575	260762	382198	302806	215000	298879	294778	419691	383807	227711	212525	212441	226711	212529	212472	218915
M169T101_2	169.081	100.6	1.7	123188	85821.7	239584	167027	122651	45101.2	163835	93949.4	184150	378470	242542	154885	183634	143048	188764	151970	37099.5	302507	136344	187212	289835	188141	58707	239340	149032	184349	228268	210215	238995	214183	203408
M169T104	169.008	104.4	1.7	858688	854631	742915	934465	647338	664747	670627	688520	950548	1.09429e+06	741007	1.30903e+06	1.236e+06	536624	1.0465e+06	720408	758768	773002	876148	623573	752132	825714	855423	1.20014e+06	709576	756892	753856	728774	721049	717454	896044
M169T121	169.013	121.2	2	349564	421954	398158	428045	260424	527984	420054	484799	835909	672595	926670	207299	738322	972782	752120	923789	1.30917e+06	3.17163e+06	1.19987e+06	806714	921241	791445	1.92145e+06	999084	716229	781409	732905	716517	716615	750845	711687
M169T227	168.836	227	3.8	1.00872e+06	934606	1.07033e+06	1.00576e+06	989298	864016	998964	1.27999e+06	628968	1.10817e+06	1.02294e+06	1.35795e+06	888229	1.02314e+06	1.13898e+06	1.0387e+06	776568	934172	1.17449e+06	1.14257e+06	1.07353e+06	1.01026e+06	764773	588462	751884	677453	1.10473e+06	1.14599e+06	1.13162e+06	1.14168e+06	1.13236e+06
M169T247	168.836	247.2	4.1	246775	351639	407780	58321.1	520233	576179	243087	331144	1.15132e+06	406695	827648	589070	354931	398653	296397	577699	517642	397517	424986	380433	388522	1.02653e+06	577837	708281	475998	455506	507103	475388	456059	476007	283209
M169T315	168.836	315	5.2	1.44547e+06	3.25896e+06	2.05381e+06	5.00377e+06	2.13261e+06	3.08759e+06	1.95523e+06	3.83147e+06	2.84962e+06	3.00036e+06	3.34363e+06	2.9275e+06	1.95564e+06	4.75071e+06	1.53464e+06	4.7094e+06	3.78865e+06	3.25136e+06	3.73332e+06	2.90001e+06	3.89069e+06	782732	2.39708e+06	1.07196e+06	2.88966e+06	3.19567e+06	1.9818e+06	3.19473e+06	2.16463e+06	3.19709e+06	3.49659e+06
M169T344	168.836	344.5	5.7	737206	1.02471e+06	970659	862443	953009	938439	1.04637e+06	840523	1.029e+06	1.28993e+06	1.29122e+06	1.04917e+06	317139	948042	1.04086e+06	890986	952844	822565	977614	839152	967913	877792	1.14957e+06	1.03245e+06	987097	985089	984134	940215	901145	899257	892379
M169T374	169.014	373.7	6.2	127934	366242	521699	423792	103500	642883	633889	493839	66014.3	194644	494841	334360	743089	208305	44713.6	452887	420180	663687	200205	244619	518659	91481.8	53099	183054	383739	383712	310852	374998	374250	240896	138015
M169T472	168.99	472.4	7.9	765422	74936.6	710777	150939	691056	816949	834304	950216	812411	1.11353e+06	695968	684419	510798	724524	1.00108e+06	858543	978110	1.13842e+06	260595	795222	891913	636749	379168	1.26194e+06	415020	574388	708956	877123	709505	616328	699267
M169T473	169.106	473.3	7.9	49347.1	62886.7	24435	92700.3	37014.4	31800.9	21425	33323.8	37129.6	20782	41336	27338.1	27746.9	36370.4	33948.5	30834.9	87556.2	88677.9	136394	55596.2	47789	19776.8	59650.2	64584.1	51532.2	48289	43243.9	70809.9	47981.9	53723.9	51700.3
M169T77	169.014	76.5	1.3	3.41107e+06	6.24289e+06	2.80521e+06	6.40458e+06	3.77437e+06	2.59313e+06	2.86401e+06	2.43408e+06	1.92653e+06	1.00259e+06	1.98001e+06	1.10612e+06	1.7613e+06	1.07779e+06	870911	1.0026e+06	2.15922e+06	2.12138e+06	2.90988e+06	2.64144e+06	1.991e+06	1.1022e+06	1.71968e+06	2.42862e+06	2.3906e+06	2.395e+06	2.39499e+06	2.40947e+06	2.38381e+06	2.3794e+06	2.39501e+06
M169T83	168.858	82.5	1.4	888068	991050	1.56271e+06	970918	801207	1.12148e+06	861651	671598	1.22995e+06	869707	1.00344e+06	1.41102e+06	2.57584e+06	1.07404e+06	2.30169e+06	3.29255e+06	629355	2.79834e+06	892856	717952	63141.3	62049.6	56837.2	1.31285e+06	2.27478e+06	2.29692e+06	2.24937e+06	2.2302e+06	2.33928e+06	2.27509e+06	2.29352e+06
M169T91	169.018	91.1	1.5	2.72974e+06	1.71714e+06	2.68419e+06	1.84254e+06	2.66877e+06	2.81088e+06	1.50093e+06	1.33745e+06	3.56742e+06	2.3087e+06	2.62318e+06	2.25106e+06	2.12806e+06	2.75636e+06	1.88663e+06	2.20057e+06	2.79986e+06	1.27551e+06	2.92138e+06	2.79811e+06	2.1569e+06	2.21764e+06	3.46749e+06	2.38183e+06	2.3433e+06	2.41802e+06	2.74154e+06	2.51617e+06	1.85745e+06	2.60614e+06	1.85821e+06
M170T111	170.094	110.5	1.8	141416	178353	146020	200556	138469	19998.2	162335	133440	317376	524531	417027	372112	300375	447913	445904	430114	346410	294502	382210	308231	287766	541310	438639	643060	285483	291288	314883	291366	299270	298714	291578
M170T159	169.992	158.9	2.6	6.3733e+06	5.73879e+06	5.31692e+06	7.49231e+06	1.36572e+07	8.55719e+06	5.29758e+06	5.85954e+06	4.56131e+06	2.06494e+06	614186	355759	1.52134e+06	1.37139e+06	4.68519e+06	374495	6.33405e+06	1.68224e+06	6.14005e+06	5.29922e+06	7.33427e+06	4.64126e+06	5.07067e+06	2.56506e+06	7.40557e+06	6.58765e+06	7.00784e+06	4.80782e+06	6.96359e+06	6.524e+06	6.73468e+06
M170T183	170.024	183	3	491159	722056	370222	337459	427775	1.00527e+06	352234	760744	1.217e+06	788611	298580	825299	1.10275e+06	883892	487219	805476	211535	504583	901401	242479	867184	471711	428180	899770	505270	559736	560194	457623	489973	676106	501199
M170T205	169.992	204.8	3.4	6.78571e+06	5.32685e+06	4.7243e+06	3.37238e+06	1.769e+06	3.3157e+06	6.33942e+06	2.68591e+06	4.56972e+06	3.4838e+06	4.73043e+06	3.47826e+06	7.49391e+06	4.23668e+06	3.76408e+06	2.42464e+06	2.85815e+06	5.9972e+06	2.44446e+06	5.99288e+06	2.18271e+06	3.19212e+06	2.06047e+06	5.33056e+06	3.43136e+06	3.0706e+06	3.0821e+06	3.07137e+06	1.91792e+06	4.01386e+06	1.78559e+06
M170T31	169.916	31.5	0.5	58865.2	14458.9	17802.5	56148.3	53413.2	69802.3	72496.2	71842.1	84777.2	18576.3	63170.1	61443.9	68365.7	62490.1	81923.9	70937.9	65145.3	20282.5	68702.6	58802.7	65980.1	68456.9	30241.3	60567.7	62864.3	64662.4	65576.1	65587.3	72040.8	59959.1	26150.3
M170T32	169.952	31.5	0.5	201830	360958	266774	209562	280603	459704	358010	620226	233289	467036	866860	250725	128904	399718	725200	458365	237054	450305	178612	203469	102957	419046	229679	236406	291105	304302	305444	401279	382261	363661	293203
M170T33	169.834	32.6	0.5	96479.5	85732.9	116016	27360.5	90441	65115	106624	79028.2	98059.6	32301.5	117396	110216	41152.2	64554.3	121631	81921.9	106437	88379.2	81347.4	120985	82325.7	108783	79631.5	28442.3	75291.5	69173.6	75039.6	69179.2	75568.9	61337.9	63495.5
M170T363	170.082	362.5	6	109512	120728	123159	188153	131287	82748.7	106494	49190.9	313584	260696	398579	252115	202125	522188	270689	452891	382103	348421	487413	349294	406766	261308	445196	227387	134669	298394	288605	301366	274930	280714	295432
M170T677	170.082	677.2	11.3	118433	254393	231387	351215	158045	138629	165316	219747	33504.6	158734	192538	104839	189845	228944	170366	226681	148001	44072.7	185130	236602	171432	187857	39856.4	167903	166366	183092	164551	63938.5	180709	180607	120614
M171T100	171.077	99.6	1.7	2.01769e+06	3.26097e+06	2.80422e+06	3.14893e+06	2.46183e+06	2.52697e+06	2.28945e+06	1.92108e+06	1.70417e+06	3.48503e+06	2.11408e+06	2.68303e+06	3.4334e+06	3.89747e+06	1.93475e+06	2.8816e+06	2.15898e+06	3.42956e+06	2.91311e+06	2.66055e+06	2.5806e+06	2.4433e+06	2.071e+06	3.66577e+06	2.64076e+06	2.78445e+06	3.0747e+06	3.07594e+06	3.16489e+06	2.8196e+06	3.0768e+06
M171T112	171.078	112.4	1.9	2.0635e+06	1.83362e+06	1.3005e+06	1.56095e+06	1.90921e+06	1.29945e+06	1.71407e+06	1.1344e+06	2.12433e+06	1.8099e+06	2.00405e+06	1.697e+06	1.61077e+06	1.53367e+06	1.52246e+06	1.8759e+06	1.82471e+06	2.39523e+06	2.10455e+06	2.38497e+06	2.0622e+06	2.37244e+06	2.13104e+06	2.15855e+06	1.84109e+06	1.91446e+06	1.86443e+06	1.86469e+06	1.86699e+06	2.00912e+06	2.02742e+06
M171T113	171.041	112.7	1.9	328054	329858	444590	512015	587318	284941	779261	683733	400426	419467	352078	353140	131558	398611	215210	335579	586959	163613	285326	1.12114e+06	339443	489029	504116	378321	306477	443949	323381	437215	293025	298838	275998
M171T118	170.994	117.6	2	112997	140550	121849	138031	141579	240285	130809	109497	90904.8	151821	111677	195795	224233	97465.2	66542.7	129163	214783	91477.5	102504	146684	93277.2	262990	125936	189622	101949	106467	144052	130319	97767.6	97987.4	96420.8
M171T121_1	171.03	121.3	2	2.26749e+07	2.63801e+07	3.10445e+07	2.76489e+07	1.84967e+07	1.38318e+07	1.93863e+07	2.07699e+07	1.29464e+07	1.16531e+07	1.78987e+07	1.02305e+07	8.78207e+06	1.31911e+07	9.81847e+06	1.115e+07	2.26812e+07	9.02685e+06	2.63703e+07	1.62936e+07	1.78158e+07	1.69523e+07	1.16445e+07	2.34889e+07	2.02863e+07	1.96343e+07	1.962e+07	2.05123e+07	2.4525e+07	2.02518e+07	1.96882e+07
M171T121_2	171.066	121.5	2	4.46589e+06	5.2079e+06	7.95513e+06	5.31105e+06	9.88567e+06	1.22926e+07	6.09648e+06	6.34641e+06	6.58084e+06	4.96216e+06	4.29974e+06	7.86679e+06	6.25154e+06	3.99446e+06	3.25316e+06	4.65256e+06	2.65776e+06	2.35522e+06	4.73658e+06	3.81867e+06	3.3913e+06	5.68337e+06	6.0154e+06	2.5772e+06	4.90386e+06	4.81966e+06	4.88785e+06	4.91469e+06	4.76985e+06	4.91698e+06	4.76846e+06
M171T125	171.008	125.4	2.1	1.07458e+06	237373	985134	565737	258235	1.50976e+06	389328	366220	702061	573671	725544	749125	512715	459112	266109	237594	612017	313544	727584	1.22248e+06	620276	1.09147e+06	1.11171e+06	1.03113e+06	547186	452555	489077	717183	553649	408378	334462
M171T148	171.008	148.2	2.5	372016	340397	596844	474911	1.66981e+06	1.41907e+06	489465	1.64153e+06	1.20754e+06	411284	1.01376e+06	2.27709e+06	1.60714e+06	2.55506e+06	1.75479e+06	2.26313e+06	1.76285e+06	1.75649e+06	719176	1.25166e+06	496962	2.77301e+06	1.94825e+06	1.17512e+06	1.12392e+06	1.2459e+06	974208	564638	975366	1.11655e+06	1.12582e+06
M171T159	170.995	159.3	2.7	313888	197997	196470	238121	255379	176752	266463	248977	114435	131109	101742	86431.6	111354	84681.8	74275.3	81280.4	309531	101273	227564	295290	310585	174682	32801.7	169210	220857	220415	234465	221264	281326	220393	234037
M171T214	170.871	214.4	3.6	103674	122999	123247	128377	529573	264973	151636	141352	327913	437741	145692	195901	696437	522436	318070	704737	165962	343750	346667	147689	693511	344232	913871	349246	224837	283807	354906	342161	305577	245980	290362
M171T274	170.871	274.4	4.6	819159	167567	315212	576747	342544	99002.7	785258	492450	489991	293929	774734	558893	168469	1.40277e+06	1.53216e+06	1.01491e+06	1.12621e+06	808674	1.65132e+06	4.15411e+06	756643	188486	1.19741e+06	228558	665905	552549	489589	553161	331549	483211	492322
M171T279	170.833	279.4	4.7	889105	236918	441548	403112	883829	656718	669245	357846	375922	706893	712649	780917	515273	739929	512266	711678	701094	118142	839138	1.14931e+06	475179	576481	647762	849954	654515	939548	636563	633939	638604	616264	693224
M171T303	171.066	303.4	5.1	3.35401e+06	3.21204e+06	3.21621e+06	3.68316e+06	2.60475e+06	3.16526e+06	2.62493e+06	3.20068e+06	2.9571e+06	3.69679e+06	3.59071e+06	4.29675e+06	3.88361e+06	4.10375e+06	2.64411e+06	3.17492e+06	2.76319e+06	3.0395e+06	4.35137e+06	3.17883e+06	3.10197e+06	3.34995e+06	3.04767e+06	4.81583e+06	3.41723e+06	3.38536e+06	3.38491e+06	3.3401e+06	3.24704e+06	3.00239e+06	3.22502e+06
M171T345	170.833	344.5	5.7	1.03636e+06	898687	1.2074e+06	1.15825e+06	2.6226e+06	684213	3.65146e+06	1.4091e+06	2.43041e+06	3.98324e+06	4.05669e+06	1.63072e+06	904641	1.68331e+06	1.36522e+06	966813	2.5194e+06	3.75636e+06	3.53248e+06	2.66237e+06	2.48541e+06	1.81214e+06	1.13937e+06	4.11216e+06	1.42218e+06	2.32814e+06	1.57418e+06	1.40007e+06	1.62262e+06	991241	1.63413e+06
M171T362	171.067	362.1	6	1.87801e+06	2.76301e+06	367269	3.82473e+06	1.19705e+06	1.68695e+06	1.44298e+06	1.991e+06	1.66114e+06	1.17337e+06	1.89347e+06	1.16211e+06	389904	1.28429e+06	1.1544e+06	289790	1.49709e+06	1.78688e+06	324943	1.70355e+06	1.55214e+06	294649	1.4869e+06	348312	1.72696e+06	1.77237e+06	1.72797e+06	1.51384e+06	1.86035e+06	1.77098e+06	1.75818e+06
M171T368	170.871	368.4	6.1	154849	60150	142878	210541	168214	37184.6	130457	29993.1	146161	235757	425234	235431	52098.9	44559.2	295495	210161	145328	24766	65878.7	184811	165419	117801	47660	271531	156592	138688	142162	88973.8	140076	116913	115065
M171T374	171.066	374.1	6.2	1.53721e+06	2.98555e+06	356885	1.70412e+06	5.89535e+06	9.1568e+06	157983	5.38622e+06	6.55134e+06	67038.4	3.28072e+06	1.30543e+06	41011.7	2.65251e+06	880677	1.09913e+06	1.18566e+06	36098	213764	7.37239e+06	1.31403e+06	4.68348e+06	265495	424613	2.04972e+06	2.53519e+06	2.53333e+06	2.24342e+06	2.65085e+06	2.79605e+06	2.64887e+06
M171T375	171.012	375.4	6.3	2.02915e+06	5.84318e+06	1.6521e+06	2.47686e+06	1.5537e+06	876355	1.65551e+06	1.58401e+06	728841	1.00518e+06	400101	265661	105097	721087	300168	892504	819924	230851	2.29275e+06	1.34935e+06	818386	1.17719e+06	317860	1.95744e+06	1.19725e+06	1.11072e+06	1.28851e+06	1.19725e+06	1.2015e+06	1.10374e+06	626349
M171T383_1	170.833	383.2	6.4	6.98502e+06	6.93116e+06	7.35293e+06	7.45532e+06	2.85656e+06	450872	5.93987e+06	4.72678e+06	684029	1.63153e+06	1.111e+06	1.12708e+06	7.0919e+06	1.42834e+06	1.01238e+06	1.40204e+06	1.11047e+07	1.30003e+07	1.09042e+07	1.09852e+07	3.39033e+06	1.20725e+06	4.7456e+06	7.65991e+06	3.63731e+06	5.94424e+06	3.05594e+06	4.58594e+06	4.62355e+06	4.597e+06	2.67917e+06
M171T383_2	170.871	382.6	6.4	334023	154455	260935	262119	357073	104762	145583	37376.8	1.09461e+06	491306	1.49833e+06	561291	891286	519209	629429	367449	755709	2.00478e+06	781203	572877	390602	761536	1.29797e+06	859590	501376	481233	510963	483598	510710	307508	517081
M171T479	170.985	478.5	8	1.39609e+06	205079	692679	529588	592332	207706	551766	154561	271276	1.22227e+06	428671	397356	571230	321947	973096	1.20487e+06	442751	684255	646083	586649	760163	662290	331224	568189	245454	422826	476503	397088	416911	413618	399697
M171T484	171.103	484.4	8.1	2.04673e+06	9.19083e+06	1.94857e+06	1.74256e+06	1.30532e+06	1.07551e+06	7.61191e+06	6.79189e+06	8.51926e+06	1.07666e+07	7.70144e+06	9.78281e+06	458286	9.08679e+06	1.08762e+07	4.77411e+06	1.2725e+07	1.22822e+06	1.7346e+06	2.84626e+06	1.17681e+07	1.13288e+07	8.32378e+06	1.55707e+07	7.19228e+06	7.67112e+06	7.66882e+06	7.64113e+06	7.2131e+06	2.65513e+06	7.18903e+06
M171T493	170.985	493	8.2	1.15247e+06	1.22527e+06	1.39276e+06	1.42807e+06	1.56489e+06	554928	1.02338e+06	1.9969e+06	745571	726137	791034	797147	467067	1.64757e+06	884649	892430	1.20437e+06	188130	1.67819e+06	2.0819e+06	973049	581562	594230	943054	1.23116e+06	1.24472e+06	1.26777e+06	903679	1.27006e+06	1.26914e+06	1.27096e+06
M171T508	170.986	508.2	8.5	859318	921584	748683	948969	697931	981845	804710	885375	1.01332e+06	662522	928297	893860	998409	1.19115e+06	1.48934e+06	876195	788083	1.02854e+06	1.02393e+06	1.02502e+06	798803	666838	739465	1.00979e+06	926654	931583	929147	852031	370865	949794	927894
M171T532	171.114	532.4	8.9	326047	151533	269067	186363	244055	240895	143366	203550	122673	72007.1	117101	105235	164526	73687.7	189671	115765	203500	160428	229825	132947	95692.9	326007	288381	206010	144060	164676	196649	150922	148809	147194	147659
M171T565	171.103	564.8	9.4	638931	1.99646e+06	1.3576e+06	1.32096e+06	1.33539e+06	994096	2.41712e+06	1.87771e+06	2.44841e+06	2.9471e+06	1.93809e+06	5.64635e+06	1.81153e+06	1.82112e+06	2.01617e+06	9.27375e+06	1.72027e+06	2.41566e+06	2.16131e+06	2.03432e+06	905797	1.93819e+06	1.03125e+06	1.89413e+06	1.52647e+06	1.41499e+06	1.90133e+06	2.65819e+06	1.54451e+06	1.56157e+06	1.57116e+06
M171T69	171.03	69.2	1.2	724561	735680	858252	784121	979723	626600	902767	626315	1.69974e+06	1.56983e+06	716498	814453	472207	1.29992e+06	1.11311e+06	630067	1.52834e+06	461445	1.05672e+06	1.02054e+06	873195	1.08523e+06	831498	645793	1.16287e+06	1.1659e+06	1.04337e+06	1.18992e+06	910481	1.06977e+06	1.03899e+06
M171T721	171.101	720.6	12	751533	1.19813e+06	1.01753e+06	513571	982225	1.4649e+06	1.11256e+06	3.0859e+06	1.93937e+06	2.8172e+06	1.03845e+06	3.7818e+06	1.35834e+06	5.89233e+06	2.66033e+06	3.40432e+06	1.71203e+06	2.41256e+06	1.89793e+06	1.94673e+06	2.06209e+06	3.41328e+06	2.46663e+06	2.80699e+06	1.50265e+06	1.4983e+06	901707	998065	1.75831e+06	1.38087e+06	1.70857e+06
M171T75	170.943	75.1	1.3	1.97473e+06	3.02479e+06	4.87024e+06	4.93792e+06	1.74443e+06	2.19918e+06	2.31949e+06	3.90026e+06	3.35582e+06	2.94435e+06	2.59572e+06	3.11115e+06	3.77049e+06	2.70829e+06	3.44752e+06	3.2514e+06	2.31049e+06	3.52762e+06	974674	5.47468e+06	6.59977e+06	3.17186e+06	2.65492e+06	2.69079e+06	2.77666e+06	2.96922e+06	2.84354e+06	3.10036e+06	2.94227e+06	2.7494e+06	2.56505e+06
M171T768	171.1	768.2	12.8	748729	1.27907e+06	994211	964847	1.03559e+06	1.11685e+06	1.03466e+06	1.20671e+06	1.39192e+06	2.74464e+06	1.73348e+06	2.50427e+06	2.67666e+06	1.25311e+06	1.29708e+06	2.40641e+06	542920	2.23447e+06	875576	493546	1.35113e+06	2.46527e+06	1.0714e+06	1.58269e+06	1.42129e+06	1.35054e+06	1.41239e+06	817477	1.34181e+06	1.41719e+06	1.41453e+06
M171T78	171.006	77.7	1.3	6.98946e+07	6.3791e+07	6.32765e+07	6.2202e+07	1.6364e+08	7.94075e+07	5.05972e+07	5.22996e+07	2.96681e+07	8.96275e+06	9.31002e+06	9.44535e+06	1.03259e+07	6.89804e+06	2.38676e+07	8.7092e+06	3.48066e+07	9.28628e+06	5.84762e+07	1.0275e+08	2.96542e+07	4.34308e+07	4.47134e+07	2.71673e+07	4.73544e+07	4.7777e+07	4.74488e+07	4.54065e+07	4.73265e+07	4.56119e+07	4.55374e+07
M171T82_1	170.855	82.4	1.4	1.7497e+06	1.93478e+06	1.67672e+06	2.17246e+06	1.34137e+06	1.00089e+06	1.73312e+06	1.59609e+06	260140	183621	221646	232251	29345.1	380845	42783.7	171503	1.84144e+06	101847	1.71803e+06	1.82396e+06	1.27184e+06	217431	176102	241780	898685	902792	898704	868675	805286	880605	903030
M171T82_2	170.902	82.1	1.4	3.4025e+06	3.80994e+06	2.0315e+06	863068	3.07457e+06	740457	3.76217e+06	1.25627e+06	994842	1.33715e+06	1.80256e+06	1.66432e+06	3.23678e+06	830036	1.82216e+06	4.57601e+06	2.3637e+06	1.97876e+06	1.16823e+07	1.1889e+06	1.6488e+06	4.43306e+06	4.11051e+06	1.74381e+06	1.2473e+06	1.26122e+06	1.39707e+06	1.02974e+06	1.37314e+06	1.40261e+06	1.68144e+06
M171T92_1	171.015	91.6	1.5	285994	23780.2	480440	247867	1.20884e+06	408028	727410	574818	738466	688426	811258	388418	1.0015e+06	678723	614023	510383	571087	373126	505781	484987	558646	466534	459657	239492	478013	473650	484436	477969	517601	467879	491129
M171T92_2	171.028	91.7	1.5	423701	1.17918e+06	2.52729e+06	950599	2.26896e+06	1.40482e+06	583591	1.01114e+06	979501	1.08302e+06	1.07513e+06	166789	707576	1.04143e+06	193144	702174	2.73016e+06	1.74635e+06	2.1692e+06	2.4008e+06	1.28778e+06	2.13497e+06	1.25218e+06	448033	1.46034e+06	1.21772e+06	780986	1.36963e+06	1.519e+06	1.44274e+06	1.27824e+06
M172T100	172.081	99.8	1.7	38276.6	36009.1	41317.1	35108.2	41281.6	46996.6	29175.3	33827.2	49784.9	29207.9	38871.2	33163.9	31574.4	32655.2	29239.4	42628	38587.8	35520.5	43086.8	44872.8	38075.2	46139.7	41136.7	38643	37643.8	37644.3	37514.5	36338.7	35762.7	37865.1	37398.2
M172T101	172.018	101.4	1.7	157298	405946	346174	342859	306364	107297	397814	331479	488505	502384	389960	313920	65938.8	462151	437620	578525	491979	339304	410526	360236	563949	403070	359772	501673	376247	351391	368343	360237	350657	351401	350732
M172T113_1	172.007	113.1	1.9	68851.3	106432	62701.2	105763	54671	72504.2	59629.6	71366.4	60910.5	41643.6	69158.6	50419.1	51995.3	51053.6	40142.1	42476.1	48992.6	55087.6	44543.2	60148.8	46671.4	52743.4	48462.5	58695.9	56935.2	56913.6	55941.1	50972.8	62938.9	55932.7	56939.7
M172T113_2	172.073	113.3	1.9	131250	394933	95301.6	595142	145779	97122.6	84439.6	118978	93909.7	76599.8	98533.4	78349.3	106851	84147.5	84222.7	100199	195465	161302	289953	177148	188267	81404.1	158708	183946	154275	157131	144405	152238	156389	168175	151902
M172T121_1	172.033	121.2	2	1.13609e+06	1.43661e+06	1.23393e+06	772832	1.73665e+06	664171	1.10723e+06	921705	1.86411e+06	1.01648e+06	1.4209e+06	1.7727e+06	1.16267e+06	611795	1.07341e+06	1.15792e+06	1.96867e+06	956078	2.15999e+06	1.74125e+06	1.08447e+06	1.29209e+06	1.464e+06	1.71498e+06	1.27621e+06	1.25413e+06	1.2543e+06	1.25419e+06	1.27565e+06	1.3908e+06	1.25508e+06
M172T121_2	172.061	120.5	2	1.47804e+06	1.41048e+06	1.52204e+06	930556	1.66925e+06	1.19506e+06	1.41707e+06	1.46212e+06	1.40847e+06	1.41853e+06	1.48774e+06	1.46429e+06	1.35919e+06	1.45207e+06	1.16688e+06	1.55085e+06	1.44217e+06	867764	883750	1.28881e+06	1.51082e+06	1.41894e+06	1.37045e+06	1.45662e+06	1.53812e+06	736407	1.39402e+06	1.54913e+06	1.49588e+06	1.51939e+06	1.51176e+06
M172T124	172.098	123.5	2.1	483313	492063	528009	582848	540524	466732	556125	550397	515344	484475	410075	336951	493985	481814	532098	465591	536910	522890	531421	649494	419154	481615	482827	502800	527264	540097	539944	539972	527347	428059	542650
M172T183	172.021	183	3	180444	186819	135967	189138	75457.6	232881	173533	134349	250020	291341	285926	203701	127851	131665	234144	226883	144628	204933	153598	138964	161314	281763	324348	258548	190917	191147	192650	191151	165679	161957	190742
M172T240	172.098	239.6	4	976242	1.06708e+06	1.11646e+06	1.08713e+06	1.03346e+06	1.03301e+06	1.01556e+06	944635	1.21858e+06	946180	831920	784951	632214	802788	687200	830079	901864	674985	1.06998e+06	1.00245e+06	633053	1.3416e+06	1.47089e+06	918225	583735	650006	633355	649625	647882	629212	649419
M172T303	172.07	303.3	5.1	229272	211161	260759	244192	238588	124064	229362	202674	66222.2	217881	176134	180569	104335	325609	55267.3	197563	256095	30295.2	221569	327560	383037	146510	224736	246917	231446	262768	262960	262823	262803	255048	215474
M172T31	171.91	31.5	0.5	7.703e+06	963221	2.00749e+06	535165	1.76552e+06	1.83096e+06	2.29635e+06	2.02329e+06	902286	2.44581e+06	700570	506360	3.40352e+06	2.25859e+06	569235	2.28187e+06	507691	2.78489e+06	193207	302669	4.79399e+06	564695	583205	483132	1.32359e+06	961684	1.68408e+06	1.82071e+06	1.46693e+06	1.63271e+06	1.66634e+06
M172T346	172.098	346.2	5.8	1.56615e+06	2.06088e+06	2.6688e+06	2.89941e+06	1.79914e+06	839703	1.49276e+06	1.94428e+06	1.88048e+06	1.75558e+06	1.17039e+06	1.02673e+06	536091	2.16817e+06	1.17904e+06	1.88054e+06	1.69983e+06	1.04383e+06	2.50985e+06	2.65171e+06	3.14407e+06	2.04911e+06	1.82069e+06	1.20484e+06	2.49676e+06	2.71352e+06	2.40576e+06	2.44075e+06	3.56891e+06	3.25193e+06	3.18492e+06
M172T407	172.098	406.6	6.8	5.34929e+06	5.39136e+06	4.96966e+06	1.24155e+06	3.13667e+06	410043	2.51864e+06	2.91547e+06	1.18238e+06	151607	1.36223e+06	438641	1.18367e+06	693374	172514	303988	3.09128e+06	1.8964e+06	4.62459e+06	1.17684e+06	925723	625917	447494	1.24897e+06	670891	1.69985e+06	1.57575e+06	1.70579e+06	1.70419e+06	1.14777e+06	1.89941e+06
M172T447	172.041	447.2	7.5	722013	623155	843369	823566	721858	443756	723851	436764	685314	669503	649467	564728	301448	573928	540202	1.12696e+06	710521	739112	871619	376161	924339	1.07043e+06	797312	672547	648592	657539	670308	657279	648568	666312	608478
M172T471	172.007	470.7	7.8	727854	413273	798937	1.57394e+06	494396	691995	720088	650650	519134	212357	792120	971111	785781	542594	137343	744562	602463	1.10451e+06	681101	733932	937000	393895	833559	383082	654052	657525	651136	740445	674233	517141	682471
M172T475_1	172.053	475	7.9	90373.2	86798.8	57134.1	86811.7	41197.6	36877.5	65558.3	71313.7	98311	90940	78724.1	56569.7	61428.4	150002	118632	77193.5	82852.6	118717	106980	82208.1	63068.3	71364	43968.3	179037	53720.3	57682.1	94359.2	50016.8	50816.8	51290.6	50593
M172T484	172.106	484.4	8.1	1.43348e+06	813652	572211	897105	805230	588903	2522.22	633296	1.21445e+06	1.38496e+06	1.51326e+06	1.00938e+06	1.16179e+06	1.50896e+06	1.43229e+06	1.11347e+06	824460	1.09171e+06	1.04029e+06	932809	204961	916029	1.05685e+06	1.12449e+06	1.03732e+06	521274	1.09878e+06	692700	909122	717595	649961
M172T58	171.91	58.1	1	755213	721771	754049	701172	747003	694581	708211	852455	848570	695789	725041	752956	856522	747989	801960	651164	652431	717495	861875	875728	738636	1.06886e+06	843299	766850	743312	844297	742389	759748	790185	756321	742081
M172T78	172.01	77.6	1.3	1.37286e+06	1.25781e+06	1.25524e+06	1.2196e+06	1.34802e+06	1.06355e+06	1.31542e+06	1.07806e+06	2.31189e+06	1.38196e+06	1.39845e+06	1.3911e+06	1.90298e+06	1.24208e+06	2.51238e+06	1.44335e+06	1.33862e+06	1.36737e+06	1.3384e+06	1.3309e+06	881390	337694	1.41662e+06	1.1412e+06	1.10051e+06	1.10209e+06	889977	1.15973e+06	1.13737e+06	1.22654e+06	1.12363e+06
M172T84	172.023	84.3	1.4	1.5284e+07	1.23618e+07	1.33132e+07	1.24845e+07	1.34293e+07	8.14448e+06	1.88726e+07	1.35906e+07	1.21303e+07	1.08842e+07	1.54161e+07	1.13771e+07	1.20187e+07	1.17455e+07	1.01421e+07	1.14863e+07	1.38653e+07	1.01268e+07	1.6423e+07	1.30743e+07	1.11686e+07	1.03102e+07	1.31211e+07	1.01995e+07	1.4401e+07	1.43931e+07	1.4929e+07	1.12607e+07	1.43881e+07	1.44006e+07	1.60757e+07
M172T94	172.026	94.2	1.6	246820	160292	676505	341755	235764	275604	248312	804021	1.28416e+06	1.68655e+06	1.42621e+06	2.31988e+06	1.85868e+06	1.43605e+06	1.65798e+06	1.40958e+06	235706	1.15308e+06	266245	315483	950510	3.10887e+06	1.19317e+06	1.75802e+06	718622	1.73578e+06	1.20471e+06	1.68472e+06	1.48328e+06	1.75938e+06	1.67846e+06
M173T103	173.093	103.1	1.7	2.9178e+06	6.18283e+06	3.17304e+06	1.91086e+06	858814	2.35296e+06	2.69642e+06	3.24193e+06	2.84589e+06	4.05267e+06	3.76318e+06	3.80697e+06	1.71893e+06	2.62411e+06	2.9283e+06	3.20325e+06	3.59525e+06	550731	2.75515e+06	3.0435e+06	4.22848e+06	4.69524e+06	2.05477e+06	5.38265e+06	2.96239e+06	2.56265e+06	2.92287e+06	2.3707e+06	2.48964e+06	2.48858e+06	2.49467e+06
M173T106	173.057	106	1.8	1.52166e+06	2.13224e+06	899955	1.68922e+06	1.62547e+06	1.28135e+06	1.71188e+06	1.83851e+06	2.56086e+06	1.38032e+06	1.65856e+06	1.52714e+06	1.47466e+06	1.42523e+06	1.65273e+06	1.45418e+06	2.40561e+06	1.98912e+06	1.723e+06	1.49712e+06	2.77972e+06	1.77637e+06	1.20701e+06	2.03499e+06	1.14736e+06	1.72999e+06	1.7096e+06	1.63048e+06	1.68664e+06	1.62934e+06	1.44004e+06
M173T108_2	173.046	107.8	1.8	3.70226e+06	2.01988e+06	2.30692e+06	2.17615e+06	1.85466e+06	1.63441e+06	140037	2.06847e+06	2.45744e+06	1.36909e+06	2.56283e+06	2.02745e+06	1.19911e+06	3.17754e+06	2.35332e+06	2.92136e+06	1.47684e+06	1.36755e+06	2.02711e+06	1.94697e+06	2.5128e+06	1.88874e+06	1.96734e+06	2.22981e+06	1.94221e+06	1.80363e+06	2.7039e+06	1.79866e+06	1.80041e+06	1.94606e+06	1.45035e+06
M173T227	172.831	227.3	3.8	2.52765e+06	4.74355e+06	5.11467e+06	1.58482e+06	3.0812e+06	2.61394e+06	3.35464e+06	747812	4.83311e+06	6.27517e+06	3.76803e+06	5.5963e+06	3.55381e+06	5.16001e+06	4.57605e+06	1.03178e+07	1.18066e+06	1.02912e+06	2.3739e+06	1.43567e+06	2.6441e+06	4.49919e+06	6.21683e+06	3.93302e+06	1.82151e+06	2.52401e+06	2.52626e+06	2.52083e+06	2.84134e+06	2.49384e+06	1.86831e+06
M173T276	172.868	275.7	4.6	457314	177343	361701	265577	319233	189132	271951	199620	177061	156617	429120	219155	107363	150484	92254.1	132633	266257	123168	171077	224882	196930	174932	123693	353286	229852	229213	229158	241704	287623	240150	229384
M173T31	172.918	31.1	0.5	497966	540012	577282	481836	542922	418882	384150	492168	516689	530238	474438	532633	483186	482050	460039	570675	534195	474967	623037	544107	477848	474989	456188	487628	488261	488296	546242	488180	497769	490235	409075
M173T345	172.831	344.6	5.7	843658	783340	2.58502e+06	2.00842e+06	1.46704e+06	1.37965e+06	1.69356e+06	2.57812e+06	1.41881e+06	1.38503e+06	2.91183e+06	1.38397e+06	490209	2.89268e+06	1.88945e+06	1.52474e+06	653466	2.8507e+06	677014	679838	1.45324e+06	1.64433e+06	1.53434e+06	1.66061e+06	1.40121e+06	1.37025e+06	1.47517e+06	1.55711e+06	2.18421e+06	1.54169e+06	1.30066e+06
M173T347	173.101	346.7	5.8	2324.39	26588.6	13897	107261	13519.5	71041.5	89800.5	12506.8	11422.3	243901	208493	134857	240997	185300	159542	301017	85959.1	166990	209460	261030	23895.1	140168	105695	190662	113151	117312	117241	116073	113311	71393.1	124315
M173T35	172.958	35.3	0.6	125864	117157	184802	103491	62598.7	105431	153631	101882	106122	138756	137877	108360	132610	96979.1	80196.3	124920	80408.1	189031	48971.5	92003.3	112267	106166	68761.7	98172.7	112569	112521	107079	112509	105003	105348	113407
M173T368	172.868	368.2	6.1	864.277	1384.58	592.772	958.796	1018.92	5932.49	230.322	324.541	34455.4	25049.5	32648.7	48467	13258.6	31186.4	43712.3	59351.5	20276.8	26782.6	27281.5	2275.75	2247.52	41232.3	40524.5	25122.1	23173.2	23224.4	21319.7	20857.1	7883.93	23340.2	23253.3
M173T383_1	172.831	383.4	6.4	920981	2.00133e+06	1.585e+06	676499	1.15981e+06	2.25397e+06	648361	1.37793e+06	1.05108e+06	5.24406e+06	452855	1.2477e+06	1.93275e+06	1.37156e+06	3.24962e+06	6.12125e+06	411812	1.24911e+06	1.83343e+06	4.19637e+06	1.26439e+06	893996	1.96032e+06	1.45179e+06	1.85407e+06	1.8042e+06	1.76666e+06	2.40444e+06	1.76946e+06	1.84413e+06	1.75534e+06
M173T387	172.992	387.3	6.5	1.9524e+07	1.05685e+08	4.92063e+06	7.80337e+06	1.91309e+06	4.30261e+06	5.02011e+06	5.08362e+06	656926	5.72624e+06	5.5319e+06	1.55178e+06	6.81399e+06	774188	4.40573e+06	1.6983e+06	9.36574e+06	1.03944e+06	2.63834e+07	4.05885e+06	4.83921e+06	1.12847e+06	3.84228e+06	2.36021e+06	7.50696e+06	8.57633e+06	7.01298e+06	1.25037e+07	6.39496e+06	6.61846e+06	6.47545e+06
M173T420	173.072	419.9	7	153916	33560.4	98672.4	58903.7	148086	32209.8	213309	123699	52123.7	59499.7	8025.04	105525	72634.7	16030.3	39870.3	5905.09	2600.58	24837.3	5038.55	3396.78	6660.3	5954.09	9553.54	2043.46	63323.1	67812.4	63178.2	67817.5	93367.1	63523.2	63338.7
M173T44	172.868	44.4	0.7	479160	325026	680653	732315	618003	271313	734779	538205	507353	206938	939603	255736	132330	467719	1.00172e+06	390893	636027	124487	132488	839152	187124	550334	142998	181520	630786	630267	626962	732130	734216	622155	794687
M173T471	173.011	470.8	7.8	121624	40170.4	105022	32320.2	109798	51593.7	82919.1	60539	125080	20847.3	104963	46314.9	11914.2	26129.6	7082.28	23721.6	22856.3	14997.1	3902.87	40820.3	49715	92576.6	5372.79	50519.9	48254	54282.7	52170.3	52026.5	54819	54932.4	55198.7
M173T503	173.118	502.9	8.4	1.50975e+06	762810	586982	970610	1.15504e+06	2.07107e+06	1.78662e+06	470424	2.07692e+06	1.24092e+06	1.07562e+06	635158	1.39828e+06	852471	1.70311e+06	2.26326e+06	1.21574e+06	840227	992235	1.74017e+06	855629	2.79918e+06	1.45155e+06	988464	1.5126e+06	1.1665e+06	672478	1.01238e+06	843258	1.15374e+06	1.18203e+06
M173T508	172.982	508.3	8.5	433454	423087	509213	467019	151707	196178	240798	608606	202887	222507	702716	261893	198733	418185	377888	209604	824597	223752	899578	291293	186217	173833	192352	584254	346790	380508	377120	500847	348865	375379	229526
M173T536	173.118	536.3	8.9	1.07361e+06	1.61306e+06	1.44796e+06	4.86813e+06	3.02371e+06	410917	1.31584e+06	2.4686e+06	1.12907e+06	2.20346e+06	1.17456e+06	3.38033e+06	8.45707e+06	2.20026e+06	1.92896e+06	5.67773e+06	1.14879e+07	1.24595e+07	6.44162e+06	1.76988e+06	4.04486e+06	3.06375e+06	8.0758e+06	7.56144e+06	3.25527e+06	3.26405e+06	3.22106e+06	4.70258e+06	2.75561e+06	3.54405e+06	4.07098e+06
M173T70	173.009	70.1	1.2	7.25608e+06	8.09074e+06	4.55347e+06	9.56525e+06	6.12793e+06	7.42643e+06	8.06696e+06	7.80691e+06	6.67613e+06	8.99539e+06	8.16064e+06	9.64322e+06	9.30019e+06	7.08115e+06	8.102e+06	9.58448e+06	9.0471e+06	7.30257e+06	1.07644e+07	1.14584e+07	7.72176e+06	7.03125e+06	6.75412e+06	4.75887e+06	8.09807e+06	6.62304e+06	7.57118e+06	7.03263e+06	4.72692e+06	6.68221e+06	7.41081e+06
M173T83	172.941	83.4	1.4	942706	654665	1.8435e+06	669113	674209	430558	2.26661e+06	570493	1.66852e+06	944570	1.96569e+06	2.13102e+06	722942	2.15537e+06	2.19293e+06	1.42048e+06	1.69936e+06	1.89059e+06	860744	2.14364e+06	1.11417e+06	2.0481e+06	1.56056e+06	1.89463e+06	1.45286e+06	1.31127e+06	1.1056e+06	1.45122e+06	1.46151e+06	1.30425e+06	1.44489e+06
M173T84	173.026	84	1.4	5.46791e+06	3.04058e+06	3.39679e+06	3.88419e+06	3.7678e+06	2.87048e+06	4.76915e+06	4.6517e+06	5.30954e+06	5.63501e+06	5.33261e+06	3.34078e+06	4.18453e+06	2.95061e+06	5.46705e+06	4.57862e+06	5.38699e+06	6.18584e+06	3.17151e+06	4.51034e+06	4.7839e+06	5.4444e+06	4.34324e+06	4.55778e+06	3.98378e+06	4.55198e+06	4.56031e+06	4.67506e+06	4.5627e+06	4.66953e+06	4.70211e+06
M173T85	172.986	84.8	1.4	1.0225e+07	3.33035e+07	3.76783e+07	3.13799e+07	2.019e+07	4.03469e+07	1.46564e+07	4.57363e+07	3.50688e+07	3.73739e+07	3.49271e+07	3.1752e+07	3.81512e+07	3.733e+07	2.36973e+07	3.01012e+07	4.17997e+07	3.6129e+07	1.88195e+07	4.07733e+07	3.75016e+07	3.5243e+07	1.6735e+07	3.32137e+07	2.82028e+07	3.54507e+07	3.54586e+07	2.89262e+07	2.95257e+07	3.55316e+07	3.26331e+07
M173T88	173.104	88.3	1.5	1.18439e+08	1.08732e+08	1.19362e+08	1.0075e+08	1.174e+08	1.00816e+08	1.09301e+08	1.09923e+08	1.07582e+08	8.96232e+07	9.72963e+07	1.05984e+08	1.15333e+08	1.0199e+08	1.00933e+08	1.10704e+08	1.01394e+08	1.0721e+08	1.16196e+08	1.03703e+08	9.88564e+07	1.26144e+08	9.4218e+07	8.71906e+07	1.03695e+08	1.03391e+08	1.06851e+08	1.03194e+08	1.07367e+08	1.06567e+08	1.02409e+08
M174T103	174.097	103.2	1.7	163570	143385	132110	381893	67101.9	51503.7	182160	198796	58155.5	55276.3	67762.7	358241	56895.1	157444	55615.8	57775.7	101478	60914.9	970875	878873	651829	53539.2	437772	122688	134981	140106	146615	141053	166512	163945	164983
M174T104	174.041	104.2	1.7	1.9418e+06	1.13641e+06	1.71e+06	1.04114e+06	4.53015e+06	2.93126e+06	3.68681e+06	183973	343462	78882.3	49414.9	18741.8	63516.4	53042.5	140371	22537.3	2.27975e+06	228616	1.9771e+06	4.2213e+06	1.70484e+06	230148	301759	143402	1.92138e+06	1.84314e+06	1.84384e+06	1.7981e+06	1.84481e+06	1.79895e+06	1.80176e+06
M174T108	174.013	107.6	1.8	717196	520395	680249	348859	1.06871e+06	246036	638909	513453	328254	478613	1.76687e+06	281989	321633	855634	44189.8	684410	1.62396e+06	1.93893e+06	235715	537006	448372	1.20201e+06	615441	650228	950655	714668	889812	727710	446079	719860	682983
M174T110	174.077	109.9	1.8	1.59889e+06	2.21094e+06	2.07475e+06	2.55362e+06	1.12707e+06	952522	1.20665e+06	1.68838e+06	3.59704e+06	3.44876e+06	3.23598e+06	2.59224e+06	3.52845e+06	2.60489e+06	698963	1.64546e+06	2.56608e+06	2.82179e+06	3.2411e+06	3.16797e+06	3.53779e+06	3.18487e+06	2.77402e+06	8.68456e+06	2.51188e+06	2.61264e+06	2.61417e+06	1.87269e+06	2.61202e+06	2.61617e+06	2.51487e+06
M174T114	173.987	114.1	1.9	78351	174483	86493.2	171454	83406.4	113253	66072.5	73512.7	93766.2	62866.9	123185	79344.9	73126.2	62501.7	59019.5	59499.5	62644.3	86499.3	63787.4	78161	69799.9	68037.4	91239.6	99351.3	91039.7	91047.3	91035.2	90178.1	84733.7	90171.6	91064.1
M174T122	174.023	122.4	2	1.2734e+06	1.50002e+06	1.35672e+06	1.09537e+06	2.00441e+06	1.84845e+06	1.33496e+06	1.17292e+06	2.68231e+06	2.4569e+06	2.68771e+06	2.85524e+06	2.42218e+06	2.60023e+06	2.63101e+06	1.92887e+06	2.45705e+06	2.07149e+06	2.88526e+06	2.61374e+06	2.04157e+06	2.516e+06	3.00765e+06	1.7934e+06	1.08902e+06	1.85741e+06	1.95756e+06	2.03464e+06	1.93473e+06	1.9512e+06	1.85713e+06
M174T143	174.085	143.5	2.4	35478.8	30958.1	36231.5	35876.7	55342.5	36499.3	21259.5	27627.6	38037.9	49727.3	42616	45575.2	24892.9	34580.7	37968.7	29596.1	73593.3	33692	62104.6	55716.9	34625	30652.6	48081.8	38951.5	43817.5	36290.7	33765.7	36250.6	32761	36699.2	29860.5
M174T152	174.023	152	2.5	740584	680804	916817	741538	866527	756781	728586	729033	718817	379820	368791	393208	253677	463396	869417	361336	724438	205653	654337	662489	692696	802034	953244	684936	679170	674573	673390	636613	690812	668270	638998
M174T174	174.077	173.7	2.9	83221.8	51745.2	19522.3	101867	35975.1	43142.8	13966.2	58632.9	37060.7	38641.3	23436.7	41128.3	118398	78081.4	75973.9	83095.8	83588.8	104928	130092	68830.5	116181	18919.1	53756.5	75852.3	50278.5	50153.7	45480.2	56693.5	50297.7	56666	51685.4
M174T315	174.023	315	5.2	2.6605e+06	3.37848e+06	1.59906e+06	3.59839e+06	1.66029e+06	4.80892e+06	1.00854e+06	2.58807e+06	6.02948e+06	2.52415e+06	2.67121e+06	1.65873e+06	1.0698e+07	3.29932e+06	2.75947e+06	1.91372e+06	3.54449e+06	7.50153e+06	7.98575e+06	2.65762e+06	5.43317e+06	3.9256e+06	8.86358e+06	6.54595e+06	3.26177e+06	3.25581e+06	3.27412e+06	3.25393e+06	2.74019e+06	2.88765e+06	2.60709e+06
M174T32_2	173.945	31.5	0.5	52403	266777	55334.3	73265.6	140387	272583	55455.2	109602	51309.8	369952	42260	99060	75527	246312	242364	186253	51949.5	114963	201308	180211	306559	180202	141782	165669	176429	176529	175839	190659	190101	206053	175968
M174T32_3	173.963	31.8	0.5	48329.3	40129.5	154216	45439.2	53732.2	165717	121875	55040.9	36289.5	24336	55569.8	18134.3	140004	107823	41811.9	47584.1	37081.8	149991	135128	93822.6	110806	27293.8	293991	80695.8	63835.3	78763.1	92378.5	62648.8	58911.8	68923	107795
M174T387	173.995	387.3	6.5	824485	914722	662623	799507	520614	658086	436693	904455	517992	426193	731242	781589	81497.6	451181	380868	307600	315421	289527	664003	226080	420887	538452	453464	301086	494379	496464	507160	522531	481212	553061	496295
M174T453	174.122	453.4	7.6	31694.3	100835	68952.5	30266.8	80894.5	26116.9	123741	27710.7	128759	111691	126349	44280.8	44321.1	144671	44239.8	82832.7	31340.3	48815.7	40843.6	70104.3	47335.4	41503.5	47369.3	22437.6	75071.8	76029.9	71660.4	54778.1	71237.6	75082.9	71865.5
M174T536	174.122	536.4	8.9	168376	66109.4	947445	494110	73465.6	15345.2	434321	123478	117140	1.06295e+06	109255	454253	411019	1.3373e+06	872760	1.04924e+06	535741	52137.8	577869	109317	581341	54343	322451	416205	285161	179984	394467	309795	338464	386019	310328
M174T76	174.041	75.6	1.3	8.94606e+06	1.57341e+07	2.38115e+07	1.75029e+07	1.82355e+07	1.77626e+07	2.11836e+07	1.88959e+07	2.09869e+07	2.23209e+07	5.6065e+06	1.45695e+07	1.52249e+07	1.66134e+07	2.11693e+07	1.99932e+07	2.30888e+07	2.06063e+07	2.68789e+07	1.5435e+07	2.39212e+07	2.65331e+07	5.48958e+06	1.48543e+07	1.86885e+07	1.85987e+07	7.76482e+06	1.22549e+07	1.8218e+07	1.8393e+07	1.83849e+07
M174T85_1	173.989	84.7	1.4	1.83381e+06	3.69865e+06	1.83418e+06	3.30248e+06	2.62453e+06	547471	2.18668e+06	1.72067e+06	369283	207769	425653	268254	258989	342137	263473	244609	1.41539e+06	340551	2.20464e+06	2.37916e+06	1.42589e+06	359496	346953	464606	1.26758e+06	1.24561e+06	1.14243e+06	1.24541e+06	1.24565e+06	1.34235e+06	1.24607e+06
M174T85_2	174.002	85.5	1.4	1.28117e+06	1.50627e+06	1.26731e+06	1.37572e+06	1.41514e+06	1.57117e+06	357731	687694	735839	985834	1.30837e+06	1.30392e+06	58541.1	698373	1.03891e+06	468083	783388	835226	1.02245e+06	744728	867600	1.11112e+06	960888	967816	951810	880999	885964	948888	881793	925380	346986
M174T88	174.108	88.3	1.5	1.03459e+07	1.5389e+07	3.22358e+06	2.82675e+06	1.10127e+07	9.48541e+06	1.11367e+07	1.13041e+07	5.17225e+06	3.23204e+07	2.2407e+07	5.59632e+06	1.48634e+07	8.03359e+06	2.73955e+07	3.9394e+07	1.10045e+07	2.99633e+06	9.86365e+06	3.03876e+06	4.60397e+06	3.13507e+07	4.7105e+06	1.61775e+07	6.94205e+06	5.49798e+06	9.89926e+06	5.63358e+06	5.72713e+06	7.01267e+06	5.54439e+06
M174T93	174.077	92.8	1.5	1.03705e+06	1.11977e+06	1.8358e+06	852115	1.19589e+06	1.82502e+06	2.09162e+06	4.76499e+06	1.65042e+06	1.69582e+06	1.31415e+06	1.69693e+06	1.13242e+06	3.23517e+06	1.13715e+06	2.00546e+06	1.31294e+06	2.15039e+06	3.35797e+06	4.91883e+06	1.9004e+06	851160	1.063e+06	405565	1.76115e+06	1.76224e+06	1.09187e+06	1.62431e+06	1.30456e+06	1.7607e+06	1.3464e+06
M174T95	174.017	94.7	1.6	1.00543e+06	1.08454e+06	962431	878651	1.03173e+06	960248	1.02739e+06	949764	926045	920645	1.07946e+06	994627	1.00766e+06	1.0218e+06	993193	1.09092e+06	1.01558e+06	855789	1.06718e+06	1.1119e+06	927057	1.06184e+06	1.08106e+06	778890	1.09472e+06	1.07257e+06	1.05652e+06	1.05694e+06	1.05921e+06	1.07291e+06	1.03281e+06
M174T96	173.963	95.9	1.6	622090	617199	658758	677552	552887	514221	673673	670255	666487	720382	642389	654038	533322	811454	605423	728424	621218	628380	767873	625210	742411	625810	626905	632318	667677	659773	656614	659776	652530	659904	629506
M175T104	174.956	104.4	1.7	1.08357e+07	2.7748e+07	1.80352e+07	2.04162e+07	1.2949e+07	1.45994e+07	2.68793e+07	2.69292e+07	3.01551e+07	3.74512e+07	2.91325e+07	1.54672e+07	1.98214e+07	2.6889e+07	3.63583e+07	3.00728e+07	2.97328e+07	1.59762e+07	3.14594e+07	2.73993e+07	3.29546e+07	1.91181e+07	3.18482e+07	2.24883e+07	2.03072e+07	2.59721e+07	2.54547e+07	1.81287e+07	2.58568e+07	2.57717e+07	2.46127e+07
M175T107_2	175.061	107	1.8	504959	586589	688066	694043	806575	850329	601399	903979	968089	551267	756739	779840	538923	660739	573921	697212	583039	547929	942143	930029	558086	924633	873768	881847	539701	575066	667443	634497	652486	709321	632513
M175T126_1	174.956	126.1	2.1	1.46018e+07	2.34828e+07	1.06727e+07	1.23173e+07	1.98395e+07	8.92338e+06	1.50531e+07	1.80248e+07	1.01259e+07	1.19288e+07	1.12503e+07	1.28201e+07	7.6649e+06	1.21688e+07	7.32141e+06	1.0305e+07	1.2277e+07	2.15312e+07	2.10859e+07	1.08233e+07	1.37396e+07	1.37006e+07	9.62327e+06	1.33693e+07	9.14936e+06	9.77308e+06	9.76653e+06	9.73492e+06	1.04158e+07	9.77658e+06	9.40775e+06
M175T179	174.955	179.1	3	1.60116e+07	1.29494e+07	1.54783e+07	1.33684e+07	1.81984e+07	1.96211e+07	1.75362e+07	1.57721e+07	1.19872e+07	1.27097e+07	7.2792e+06	3.08018e+06	1.54266e+07	1.03501e+07	9.92414e+06	1.00516e+07	9.45388e+06	3.00411e+06	1.16881e+07	9.29385e+06	1.05573e+07	1.57655e+07	3.88305e+06	1.4973e+07	1.15434e+07	1.16148e+07	1.1924e+07	1.19395e+07	1.19289e+07	1.11679e+07	1.33092e+07
M175T190	175.098	190	3.2	167743	190571	190459	254406	256804	330871	147789	53894.7	168663	80143.8	193564	154128	173056	71266.9	208954	121483	247840	216862	303450	286873	120361	312566	291120	114837	226512	238070	217894	215979	213229	212241	246263
M175T227	174.829	226.7	3.8	572399	560304	564721	865965	539803	495041	706118	1.17356e+06	1.24116e+06	1.21721e+06	883661	973437	858794	2.08567e+06	1.13651e+06	1.52949e+06	1.17043e+06	1.55221e+06	1.16419e+06	1.24575e+06	1.68329e+06	1.14114e+06	1.42666e+06	1.47662e+06	885155	990637	993604	963152	992038	1.03736e+06	961216
M175T295	175.098	294.9	4.9	1.79415e+06	2.30479e+06	923217	1.96056e+06	1.83613e+06	1.01236e+06	2.09856e+06	1.74078e+06	1.05457e+06	684219	1.44186e+06	705594	631197	718445	898817	1.24549e+06	2.15448e+06	1.48239e+06	2.9394e+06	2.67673e+06	1.39733e+06	1.00167e+06	1.51076e+06	1.37939e+06	1.23721e+06	1.2876e+06	1.17544e+06	1.2867e+06	1.23138e+06	1.54085e+06	1.28491e+06
M175T302	175.062	302	5	521045	462526	528605	545682	448306	578934	555274	496234	648619	473012	466873	557958	526468	484456	556435	466006	630598	510614	514135	568370	495163	503320	473720	519773	522135	520677	531315	507089	488888	520724	499684
M175T303	175.098	302.6	5	388755	411167	517369	442268	428739	450413	396305	456637	1.00153e+06	1.0224e+06	1.16717e+06	1.1163e+06	859334	1.11844e+06	879873	1.08653e+06	621637	1.20929e+06	535015	612954	626350	924226	1.01682e+06	944599	956336	968657	909590	1.00564e+06	1.0288e+06	843284	915948
M175T314	174.829	314.4	5.2	1.00706e+06	3.08459e+06	719767	474487	727435	498636	1.41446e+06	914222	655450	753147	793283	456167	1.45886e+06	114221	88889.8	245333	658002	571682	1.79549e+06	973166	586335	501486	123976	957987	573712	832986	833568	837363	607113	784233	834447
M175T32	174.927	31.5	0.5	33944.7	32513	35674.6	30026.4	38730.9	33313.8	65466.6	34224.8	36703.9	33518.9	44948.9	37591	30949.6	35817.2	33717.8	31625.7	37671.7	31646.9	33067.6	34194	31332.1	49480.4	32226.2	36969.1	32350.2	32350.2	29701.7	32358	32840.6	32820.6	33905.2
M175T344	174.828	344.4	5.7	428492	455142	349066	470422	300120	368391	645546	475476	552212	1.08711e+06	1.07277e+06	695106	1.0999e+06	1.2282e+06	826659	1.79268e+06	615436	763549	1.12366e+06	1.19794e+06	540859	877839	622737	884865	660281	576444	660188	659879	658643	649502	654035
M175T362	175.061	362.3	6	202519	214366	210647	212133	163837	133622	191669	155369	96468.7	141891	147997	143050	65947.3	155086	121236	95067.6	168126	100614	146387	208629	169056	181782	145375	158338	140686	135297	150596	143357	143387	158927	140682
M175T368_1	174.829	368.4	6.1	316285	117773	292760	288523	218890	22039.1	385590	273302	182865	161141	307929	179250	16136.2	348302	267850	211389	193462	17041.3	51538.1	238721	226905	154261	133162	67637.4	197903	72795.2	198373	197316	190945	185651	186130
M175T368_2	174.957	368	6.1	2.21448e+06	1.66898e+06	1.77943e+06	844061	1.89353e+06	1.53202e+06	3.26602e+06	1.86644e+06	2.64985e+06	2.19535e+06	1.51033e+06	1.05258e+06	1.58446e+06	2.97579e+06	1.3547e+06	2.67822e+06	2.15899e+06	4.2418e+06	2.31005e+06	2.58068e+06	3.34148e+06	737785	1.52865e+06	1.89904e+06	1.79697e+06	1.79664e+06	1.88363e+06	1.87479e+06	1.78718e+06	2.04754e+06	1.40705e+06
M175T374	175.061	373.9	6.2	523706	366102	293648	343114	613313	409503	519169	412967	415897	722811	369180	322820	728034	514817	686606	496638	538934	435153	441622	393009	455554	667846	436173	676814	414708	298888	256549	507699	348293	415296	542954
M175T375	175.098	374.7	6.2	10742.2	7056.38	4707.54	98721	46707.9	34229.2	21424.3	83067.4	97287.2	114803	19667.8	64823.7	145515	97235.9	107149	131310	92888.6	120919	126942	140638	128130	103357	171365	118595	106930	112279	101156	122757	135219	123363	99844.5
M175T380	174.954	380.4	6.3	2.31686e+06	1.43821e+06	2.52903e+06	1.56956e+06	1.884e+06	1.34659e+06	1.04455e+06	1.85234e+06	1.05292e+06	1.15832e+06	1.6782e+06	1.80868e+06	1.65843e+06	1.75714e+06	1.08949e+06	2.10445e+06	2.40773e+06	2.31835e+06	2.43784e+06	1.70938e+06	1.9185e+06	1.00266e+06	1.41997e+06	1.28113e+06	1.8648e+06	2.09655e+06	1.84748e+06	1.84946e+06	2.06663e+06	2.0512e+06	2.05503e+06
M175T387	174.988	387.2	6.5	803030	775633	1.13443e+06	948172	964758	987445	881177	773604	1.11518e+06	629828	1.06843e+06	567118	373838	932542	108851	230129	671792	613003	667442	773671	187221	290373	896850	922649	442644	431999	304003	343070	335280	352549	522285
M175T396	175.098	395.8	6.6	646727	669678	582224	792861	428014	856097	505155	589792	439891	342724	470609	387591	197653	303337	357829	397344	564065	263343	667540	499343	626745	448137	329241	375131	289410	425489	392034	392141	326727	456518	374982
M175T433	175.098	433	7.2	258193	1.75423e+06	223816	1.83185e+06	233982	207369	246235	384311	120509	95657.5	116207	77212.9	137511	126117	79642.2	136680	198313	639262	303380	217841	314614	95419.3	210023	85994.2	293678	311977	292018	312964	314959	312625	96466.6
M175T534	175.06	533.5	8.9	253830	262234	221991	315672	235389	262765	263300	318782	304972	336745	237306	251667	276617	239385	312615	167960	189346	277235	296833	254384	294714	171366	299555	226797	276659	267508	274556	273657	273475	263970	246481
M175T56	174.955	56	0.9	7.45582e+06	8.17691e+06	8.29805e+06	8.66119e+06	8.2361e+06	7.96955e+06	8.12138e+06	8.78964e+06	9.10612e+06	8.33909e+06	9.05395e+06	8.57212e+06	5.904e+06	8.91987e+06	8.23542e+06	9.07858e+06	8.45399e+06	9.52075e+06	8.95778e+06	1.10596e+07	9.24307e+06	8.50731e+06	8.2378e+06	8.55687e+06	8.23555e+06	8.33028e+06	8.23457e+06	8.23767e+06	8.33476e+06	8.58862e+06	8.23505e+06
M175T69	174.988	69.3	1.2	204268	552796	794878	415849	677034	587821	182679	639392	696883	208662	790230	328705	907724	772410	743846	786754	220146	760936	706005	813120	627531	726220	184252	162335	306216	572928	274209	436578	314805	325244	335300
M175T741	175.116	741.4	12.4	252822	260506	596520	272237	336376	177263	259479	173146	734841	252855	1.01637e+06	259465	447213	391813	325189	436322	688157	237352	1.02352e+06	274037	760394	227100	228817	845869	346705	349555	279502	392857	398350	340931	520220
M175T76_2	175.044	75.7	1.3	59595.5	40990	60219.2	2.03378e+06	90862.3	77169.7	43180.1	66325.2	1.3139e+06	2.87884e+06	1.03049e+06	3.74331e+06	5.11866e+06	2.34985e+06	6.88078e+06	4.03484e+06	2.61226e+06	2.94175e+06	3.69838e+06	3.18166e+06	1.87416e+06	3.31556e+06	1.69767e+06	4.3936e+06	875312	765113	882847	922083	937535	916862	919980
M175T833	174.982	832.8	13.9	5.6172e+07	4.41476e+07	4.35569e+07	5.35033e+07	9.03385e+07	1.0661e+08	4.25542e+07	3.14033e+07	7.16312e+07	1.04608e+08	8.27732e+07	1.06015e+08	7.44704e+07	5.37053e+07	3.53224e+07	9.68769e+07	8.53207e+07	1.02759e+08	1.44439e+08	3.54584e+07	9.27647e+07	8.82098e+07	1.12613e+08	1.21543e+08	6.39335e+07	6.82878e+07	6.82884e+07	6.9056e+07	5.2195e+07	6.82933e+07	5.11355e+07
M175T85	174.984	84.8	1.4	1.4397e+06	458427	1.84787e+06	788744	4.53937e+06	1.91068e+06	3.08346e+06	2.20144e+06	3.83782e+06	3.63294e+06	4.36484e+06	1.88202e+06	3.70459e+06	2.60651e+06	2.53576e+06	2.44118e+06	2.36163e+06	1.06266e+06	1.82004e+06	2.41169e+06	1.89023e+06	2.10394e+06	2.55382e+06	836015	2.15261e+06	2.27727e+06	2.25835e+06	2.25849e+06	2.278e+06	2.27833e+06	2.27798e+06
M175T88	175.072	88.3	1.5	471677	755895	446985	806832	457066	530660	541982	500498	680617	662146	710266	502763	844276	635624	665962	703849	909891	741194	967563	505263	802941	557558	691754	731309	640814	690831	654656	668695	641724	601174	643054
M176T128	175.942	128.2	2.1	493743	397464	457874	132488	395926	540981	471694	512728	251612	58640.7	250277	56752.7	206284	75135.7	187635	187823	413081	322451	455651	493000	393172	291214	224521	275925	136335	294443	311857	312240	311976	303621	294414
M176T147	176.039	147.3	2.5	2.94849e+06	2.81484e+06	1.92853e+06	1.64284e+06	2.16059e+06	965376	2.55596e+06	1.46327e+06	1.37649e+06	314382	1.25652e+06	791356	224679	787308	218863	474300	747710	185773	774165	1.49489e+06	1.0131e+06	300307	287808	1.94731e+06	1.11829e+06	1.18353e+06	1.1518e+06	1.18402e+06	1.18321e+06	1.35311e+06	1.15168e+06
M176T303	175.942	302.9	5	49133.1	58559.5	241826	82091.2	242984	84916.2	72169.7	74843.6	127586	346992	134679	424981	972824	262063	460791	478515	502839	1.32604e+06	772812	153844	640868	156188	469242	355727	375692	381873	376698	380904	390759	367447	386779
M176T315	176.019	315	5.2	252043	103410	76485.2	64488.4	76474.9	82754.4	16966.2	522590	546181	113058	433084	2676.98	358793	872154	173032	97395	109810	538031	64047.1	54803.4	60725	290492	77655	134081	76513.5	62846.8	119533	86592.1	119248	119577	124481
M176T35	175.942	34.5	0.6	43793.5	252645	29484.7	5245.26	3291.92	1042.57	5596.41	2534.53	3071.22	104525	2482.34	8145.52	7643.87	67750.4	18040.6	30884.2	3265.14	421.84	74822.5	123174	2135.79	3481.33	2008.49	55639.2	39127	39097.2	38282.4	39754	41868	39851.1	39856.1
M176T67	175.942	67.2	1.1	176573	173392	61056.6	157002	178301	65437.2	50625.6	167152	201094	57218.5	49642.5	73281.8	61546.9	75780.4	55857	189885	174893	69910.6	189303	70619.2	172687	74343.9	72750.5	190728	210494	199230	186144	188503	185859	185333	75642.5
M176T81	176.056	81.4	1.4	1.51067e+07	1.71573e+07	1.56011e+07	1.65178e+07	1.5645e+07	1.66956e+07	1.93889e+07	1.90502e+07	1.70894e+07	1.55251e+07	1.55715e+07	1.53633e+07	1.54774e+07	1.57293e+07	1.72622e+07	1.85154e+07	1.54406e+07	1.50386e+07	1.75568e+07	1.56359e+07	1.52139e+07	1.76419e+07	1.80732e+07	1.50052e+07	1.50966e+07	1.50082e+07	1.50373e+07	1.49471e+07	1.25268e+07	1.50977e+07	1.47816e+07
M176T96	176.002	96.4	1.6	1.34065e+06	1.28849e+06	1.73751e+06	1.16813e+06	1.72982e+06	1.18762e+06	1.71471e+06	1.87498e+06	1.82264e+06	1.38699e+06	990690	1.50415e+06	1.01078e+06	1.67382e+06	1.49033e+06	1.64852e+06	1.3236e+06	1.38774e+06	2.29771e+06	1.90721e+06	1.60562e+06	1.44942e+06	1.24184e+06	1.5863e+06	1.62288e+06	1.62164e+06	1.38253e+06	1.62135e+06	1.54162e+06	1.62403e+06	1.6321e+06
M177T107	177.077	106.9	1.8	84079.9	81539.5	40530	96246.1	114367	97716.4	165526	120221	95986	101026	112137	112171	65901.9	106217	100196	112551	131040	27322.1	104360	138124	104885	136661	38404.7	73545.4	87463.1	85746.3	92172.3	86184.2	55388.1	91594.6	91968
M177T111	176.986	111.1	1.9	160113	159564	150633	162826	154867	106847	165581	148856	156959	149767	154645	140198	103468	159618	159596	158742	153317	143454	161910	162178	155650	159221	149503	162005	144987	155117	143462	151998	155358	171754	151906
M177T618	177.092	618.4	10.3	318268	340223	177316	212526	304213	154358	359792	162311	339735	274966	203243	409753	341613	157040	301534	166912	388291	136071	138640	174973	190325	125230	614129	101988	190226	263840	296782	266353	231324	244716	278922
M177T73	176.926	72.5	1.2	222492	257456	200924	249449	190159	282949	198706	198021	261403	462912	257649	296712	354841	339226	684058	708625	340278	1.49054e+06	505223	896295	332243	236590	380270	284457	389454	390195	387663	394929	387671	388427	381157
M177T76	177.04	76.2	1.3	7.59757e+06	6.47065e+06	5.53358e+06	6.14795e+06	6.1852e+06	2.68346e+06	8.94705e+06	9.02726e+06	3.21625e+06	3.46609e+06	3.66726e+06	3.14676e+06	2.95204e+06	6.53732e+06	3.67205e+06	3.7147e+06	8.83295e+06	1.53862e+06	6.80867e+06	8.37335e+06	8.36521e+06	2.82174e+06	3.23685e+06	3.73617e+06	5.40497e+06	5.33309e+06	5.40321e+06	5.33079e+06	5.51123e+06	5.33225e+06	5.01449e+06
M177T765	177.092	765.2	12.8	6.97059e+06	6.81799e+06	3.46628e+06	3.43114e+06	8.51612e+06	1.13632e+07	7.72388e+06	8.88297e+06	9.24921e+06	5.97326e+06	1.1788e+07	7.06779e+06	6.22217e+06	6.81103e+06	5.48106e+06	7.70343e+06	3.1567e+06	3.23824e+06	2.92182e+06	5.69004e+06	4.41706e+06	8.56796e+06	7.37422e+06	1.97058e+06	6.55077e+06	7.47147e+06	5.11387e+06	5.79456e+06	6.55246e+06	6.55922e+06	6.30607e+06
M177T79	176.935	78.7	1.3	5.42901e+08	6.53362e+08	6.87947e+08	6.96183e+08	5.34854e+08	6.07112e+08	4.60961e+08	8.35236e+08	1.1657e+09	1.14802e+09	1.29491e+09	7.30369e+08	1.27477e+09	1.58382e+09	1.05964e+09	1.30417e+09	1.01424e+09	9.37473e+08	1.10899e+09	1.14206e+09	1.25577e+09	7.22482e+08	9.49659e+08	1.01415e+09	9.6768e+08	1.03304e+09	9.62117e+08	9.86966e+08	9.88214e+08	9.79749e+08	9.60211e+08
M177T809	177.165	809	13.5	1.4847e+06	2.15404e+06	4.11472e+06	2.2984e+06	722606	1.31256e+06	2.1973e+06	2.44756e+06	1.93421e+06	3.87738e+06	2.18879e+06	2.58179e+06	1.91834e+06	1.93749e+06	2.55918e+06	2.58824e+06	2.52224e+06	3.63575e+06	3.18928e+06	2.75172e+06	1.89407e+06	1.66924e+06	3.63147e+06	1.67936e+06	2.2389e+06	2.04026e+06	1.17376e+06	2.82768e+06	2.2562e+06	2.28128e+06	2.03998e+06
M178T108	178.018	108.4	1.8	1.73394e+08	2.00977e+08	1.28395e+08	9.90683e+07	1.18783e+08	1.70979e+08	1.22472e+08	9.75625e+07	2.39939e+08	1.31816e+08	2.14221e+08	2.41609e+08	1.64632e+08	1.24654e+08	1.37155e+08	1.55215e+08	2.66889e+08	7.6153e+07	1.6599e+08	1.90537e+08	1.52352e+08	1.81771e+08	1.0695e+08	2.03289e+08	1.3362e+08	1.34272e+08	1.30155e+08	1.34218e+08	8.75481e+07	1.24744e+08	1.25115e+08
M178T276	177.845	276.5	4.6	135603	72257.4	164343	114567	160213	65129.1	122949	51295.7	128764	91296.9	62964.8	118700	183665	64354.3	111573	60498.5	50921.2	61329.7	196257	243263	119295	151773	167225	77216.9	70317.2	114144	44026.3	70175.3	78920.9	64246.1	81295.8
M178T31	177.903	31.5	0.5	308150	382899	316672	329753	398251	478129	337904	343966	403963	358446	345598	387594	363268	323390	332105	330400	263565	269763	337169	339777	339210	335228	384982	234342	340373	333689	337071	333641	333620	337063	316279
M178T334	178.051	333.9	5.6	3.37008e+06	1.55735e+06	3.18702e+06	2.80409e+06	3.39248e+06	1.09754e+06	423143	3.37599e+06	211349	2.09228e+06	2.11201e+06	1.3819e+06	4.62112e+06	2.94542e+06	3.17297e+06	3.30405e+06	3.07842e+06	3.78522e+06	3.76059e+06	2.94864e+06	4.15765e+06	1.94873e+06	2.75873e+06	2.55547e+06	2.92882e+06	3.08925e+06	2.83078e+06	2.57224e+06	2.26196e+06	2.83332e+06	3.0714e+06
M178T432	178.015	431.9	7.2	106054	89298.4	66678.2	49238.5	98836.1	87984.3	80464.2	85948.6	86064.2	34428.5	117735	101440	35608.7	111755	116059	86336.3	88848.5	112145	35369.3	94637.4	36170.3	39334.7	89758.5	36637.3	91388.1	91498.1	43870.5	90844.6	62385.9	85050.5	91285.5
M178T477	178.049	477.2	8	436734	316307	691498	583705	1.03438e+06	74092.9	609389	1.30594e+06	681783	618779	670787	435745	1.07261e+06	710956	778638	935629	1.04275e+06	1.71469e+06	1.47819e+06	698959	1.41768e+06	491951	466640	882343	812255	795584	786642	969340	838083	791978	837811
M178T565	178.124	564.7	9.4	92006.9	74777.7	22152.8	91801.4	29064.2	28299.7	147454	89977.8	38852.9	76582.6	91744.8	47010.6	57718	60357.4	55869.5	76525.9	158973	55711.7	130452	113467	63925	92319.7	53578.5	79649.7	74622.8	106258	77760.4	70086.8	69245	64167.9	78791.1
M178T659	178.1	659.3	11	275334	272560	100737	301857	309947	165619	204152	139690	179159	82234.4	187376	51121.4	106491	83847.7	35720.9	93854.4	247090	161239	161460	361396	240985	70993	201596	195338	122700	137713	140236	100951	123126	131682	179360
M178T713	178.168	713.4	11.9	48674.9	99521.5	109463	63413.6	139306	95890.3	115776	76386.8	123228	235217	260820	118865	210102	145410	205788	155258	135554	481519	68815.4	80500.6	22724.7	164488	148717	69766.8	103128	129945	95343.5	44387.7	94349.4	103602	94655.1
M178T79	177.94	78.6	1.3	3.40692e+06	2.68596e+06	2.59538e+06	2.59458e+06	2.1275e+06	1.06434e+06	2.02684e+06	2.2325e+06	2.11083e+06	1.36253e+06	3.07759e+06	1.76678e+06	1.13867e+06	1.65382e+06	1.38488e+06	1.87879e+06	3.18904e+06	1.55057e+06	4.8598e+06	3.43848e+06	2.45797e+06	2.47461e+06	2.13406e+06	2.74424e+06	2.26908e+06	2.26801e+06	1.81328e+06	2.26859e+06	2.26871e+06	2.26704e+06	2.26792e+06
M179T104	178.88	103.7	1.7	53380.7	34672.6	57699.4	208225	40349.9	46956.5	102872	147545	417657	965696	731462	302826	387690	573914	459563	398495	178481	541135	342376	219648	213795	479206	498864	554378	321238	306414	335881	335983	196077	335743	336454
M179T108	179.021	108.3	1.8	7.05415e+06	6.59885e+06	8.44988e+06	6.08951e+06	9.11602e+06	8.19909e+06	9.04331e+06	6.70706e+06	3.6969e+06	6.7691e+06	7.24467e+06	9.21637e+06	7.58566e+06	6.41827e+06	6.56023e+06	7.10499e+06	5.79751e+06	4.02988e+06	5.76411e+06	6.31882e+06	5.58329e+06	6.58793e+06	3.06323e+06	4.17178e+06	7.04708e+06	6.33143e+06	6.62607e+06	6.8546e+06	6.55625e+06	6.55595e+06	6.55594e+06
M179T260	179.035	259.6	4.3	292033	331776	356854	1.29041e+06	1.03149e+06	613240	317652	1.25397e+06	1.01837e+06	1.53377e+06	1.46522e+06	783476	617086	1.06741e+06	358209	1.33987e+06	1.1129e+06	771584	693553	976488	1.69555e+06	765407	1.24528e+06	1.34022e+06	696841	699107	889168	891024	854549	651842	758373
M179T303	179.046	302.6	5	532950	380985	408550	687912	224817	232326	446374	473298	208776	385616	313831	339527	371118	406501	366147	399405	493644	180796	729495	558076	548682	324470	204590	456950	405395	388480	389741	367183	435220	404388	404285
M179T332	179.072	332.3	5.5	537501	711252	783014	723177	438193	405133	666919	599571	570870	555765	655870	633397	183080	615907	418426	521887	394080	179778	392089	543528	382599	460172	202870	451423	465305	485596	478343	485385	485519	451506	477238
M179T445	179.108	444.7	7.4	383748	317888	528205	642346	345043	262512	275671	273711	536108	618349	429893	515123	546446	131615	471249	568923	432675	62462.1	731246	434606	92393.7	326539	734030	681761	518160	473149	519423	449747	169548	500103	518339
M179T492	179.083	491.9	8.2	70430.9	51431.4	81698.3	45720.3	89236.8	64493.7	1589.16	77242.9	100558	160295	136785	46059.5	540309	5935.75	222601	46267.5	318633	1.20495e+06	90344.5	99430.5	17179.5	75734.9	301696	511124	112405	106416	104451	130265	105663	62836.4	112819
M179T537	178.996	536.9	8.9	4.37171e+06	3.84109e+06	1.48181e+06	6.69218e+06	4.60579e+06	4.32218e+06	1.58207e+06	2.61998e+06	5.25725e+06	4.10748e+06	1.69698e+06	1.45391e+06	1.71715e+06	1.04134e+06	1.88501e+06	1.44532e+06	1.5869e+06	1.53145e+06	4.30645e+06	1.57266e+06	2.98284e+06	7.33426e+06	1.55722e+06	2.24828e+06	2.5461e+06	2.87195e+06	2.88146e+06	3.13387e+06	3.40721e+06	3.02442e+06	3.80323e+06
M179T737	179.071	737.1	12.3	2.16745e+06	1.83917e+06	2.44608e+06	1.51332e+06	2.50505e+06	2.96841e+06	2.51922e+06	3.29186e+06	2.77068e+06	3.04404e+06	3.58764e+06	3.24446e+06	2.57525e+06	1.28203e+06	3.084e+06	3.41289e+06	3.1414e+06	2.50508e+06	3.87665e+06	3.07593e+06	2.26842e+06	2.6497e+06	3.84365e+06	2.71635e+06	2.91396e+06	2.91926e+06	2.39688e+06	1.99288e+06	2.97993e+06	2.70785e+06	3.00268e+06
M179T744	179.18	743.7	12.4	3.90389e+06	2.11557e+06	6.05484e+06	9.29861e+06	9.76531e+06	5.81486e+06	1.26776e+07	4.35569e+06	3.63513e+06	516542	235579	730042	1.31274e+07	243250	501977	470213	2.41433e+06	354133	3.27147e+06	4.45707e+06	3.55054e+06	996783	285075	2.45644e+06	3.21637e+06	3.20377e+06	3.00018e+06	2.99627e+06	1.00506e+06	3.19759e+06	3.19159e+06
M179T761	178.978	760.7	12.7	7.08778e+06	8.98984e+06	5.22266e+06	2.62539e+06	2.65341e+06	3.30786e+06	1.13792e+07	3.76561e+06	3.42568e+06	4.41702e+06	5.23906e+06	3.18672e+06	2.89792e+06	5.86068e+06	2.64445e+06	3.848e+06	9.61421e+06	3.0465e+06	6.52388e+06	1.1632e+07	1.29875e+07	5.87345e+06	3.45278e+06	1.02312e+07	4.91986e+06	5.49728e+06	6.66165e+06	5.53612e+06	6.38497e+06	5.88318e+06	5.5254e+06
M179T765	179.108	764.9	12.7	37305.9	17688.9	25588.9	3846.94	17006.4	3152.18	16314	16598.1	368152	240515	1.94552e+06	3.70759e+06	1.63313e+06	2.51252e+06	4.32988e+06	3.52666e+06	308954	1.60333e+06	157613	5458.33	84021.8	412854	430973	99693.4	623606	281501	687458	680564	680534	632735	766051
M179T79	178.94	78.7	1.3	1.25032e+07	1.11486e+07	1.39436e+07	1.02202e+07	1.19798e+07	7.15126e+06	1.19842e+07	1.06003e+07	1.1312e+07	1.45433e+07	1.39453e+07	1.41521e+07	2.25536e+06	1.79912e+07	1.22484e+07	1.17237e+07	1.23352e+07	6.83933e+06	1.36947e+07	1.42681e+07	2.21235e+07	1.13563e+07	9.81248e+06	1.14629e+07	1.71053e+07	1.32579e+07	1.34918e+07	1.28343e+07	1.35279e+07	1.25516e+07	1.27906e+07
M179T814	178.977	814.3	13.6	3.30156e+06	2.45368e+06	5.17995e+06	3.92549e+06	3.72375e+06	4.0153e+06	4.77143e+06	6.35578e+06	6.84837e+06	6.15224e+06	5.763e+06	5.88982e+06	6.88129e+06	7.43005e+06	7.53678e+06	7.78281e+06	5.8159e+06	1.14243e+07	1.62039e+07	4.76682e+06	4.82464e+06	8.7789e+06	6.71609e+06	1.15207e+07	7.68699e+06	4.68026e+06	7.15096e+06	7.42737e+06	7.53244e+06	6.47516e+06	7.55009e+06
M179T90	179.056	90.2	1.5	6.08455e+07	6.57142e+07	5.65319e+07	3.51404e+07	7.55233e+07	6.55166e+07	7.53803e+07	3.41733e+07	4.2299e+07	5.42497e+07	2.75391e+07	5.32524e+07	6.83619e+07	3.89419e+07	5.11755e+07	3.93507e+07	5.40362e+07	5.85361e+07	7.05583e+07	7.57188e+07	4.47441e+07	8.67928e+07	6.48361e+07	4.73227e+07	7.47291e+07	5.23962e+07	4.8338e+07	4.80688e+07	4.82914e+07	4.87192e+07	5.11197e+07
M180T104	179.997	104.3	1.7	324431	304894	335891	296585	321576	239217	452539	447888	546951	878950	667356	603358	571910	670767	847758	843296	619037	607944	526426	675341	634745	507080	552477	627245	491802	512015	491926	454584	497451	497520	491794
M180T108	180.014	108.3	1.8	7.04818e+06	7.1871e+06	6.83094e+06	5.62629e+06	6.81039e+06	3.81661e+06	8.90516e+06	6.69358e+06	5.99539e+06	6.8085e+06	5.55607e+06	6.24276e+06	3.92182e+06	6.50313e+06	6.68592e+06	6.86244e+06	8.24354e+06	2.69218e+06	5.132e+06	5.69254e+06	4.83705e+06	4.17369e+06	3.52959e+06	3.62425e+06	7.04114e+06	4.95063e+06	5.65502e+06	5.61157e+06	5.60941e+06	5.419e+06	5.42363e+06
M180T122_1	180.034	121.6	2	2.58387e+06	2.24872e+06	2.78199e+06	2.12869e+06	2.53795e+06	283260	3.25628e+06	2.26927e+06	4.74217e+06	1.18337e+07	7.16911e+06	7.54097e+06	6.76374e+06	1.03096e+07	9.90223e+06	8.02468e+06	4.13998e+06	1.06912e+07	3.24171e+06	3.28182e+06	3.99947e+06	4.48367e+06	5.27392e+06	5.829e+06	5.02309e+06	5.84429e+06	5.99552e+06	6.66701e+06	6.48903e+06	6.17161e+06	4.57637e+06
M180T122_2	180.067	121.9	2	9.22086e+07	6.34252e+07	1.06662e+08	6.4225e+07	1.03132e+08	6.09513e+07	1.26514e+08	8.85632e+07	1.09999e+08	1.76586e+08	1.50895e+08	1.91791e+08	8.33653e+07	1.54412e+08	1.49919e+08	1.46017e+08	1.41148e+08	1.20867e+08	1.32673e+08	1.86844e+08	1.13798e+08	1.5285e+08	1.0335e+08	1.76939e+08	1.03781e+08	9.2346e+07	1.04483e+08	1.03743e+08	1.18711e+08	1.10193e+08	1.11586e+08
M180T303	180.066	303.2	5.1	847048	870718	488819	946027	556819	730461	567572	601353	580555	576790	491357	634141	442111	633512	712582	570118	794478	514689	970429	724019	599069	482524	684733	530583	520225	530326	628510	646417	498241	501721	463309
M180T309	180.034	309.5	5.2	91204.1	183357	122186	207224	100438	137076	66498.4	171771	843028	1.06744e+06	913895	1.092e+06	1.16897e+06	1.17286e+06	1.4285e+06	1.16753e+06	217693	1.02687e+06	347526	220896	271829	596286	743768	569266	393604	391765	393922	391751	392370	160567	372898
M180T316	180.016	316	5.3	66970.7	120721	61934	127949	52921.5	92728	53654.8	52416.9	95832.7	42924.2	87354.4	53942.4	66509.8	23827.7	51478	55426	53866.6	132787	70100.7	53403.5	46838	62102.2	92485.2	94657.2	71887.3	72566.5	76505.8	75626.8	74783.5	75967.9	74648.7
M180T318	180.034	317.7	5.3	763412	1.18641e+06	510311	968462	455615	658016	470510	602630	951977	462087	1.07806e+06	580426	721603	433141	448056	550239	426934	1.06008e+06	608297	531473	377197	464177	705121	853551	671200	612756	592415	670823	793566	645269	670849
M180T35	179.842	34.6	0.6	22913.4	57049.2	45048.6	40601	29554.9	112340	3849.62	133547	81794.7	45405.9	52437.8	30745.1	43145.8	67927.4	77781.9	80010.2	119238	41007.3	120325	119595	40971.4	113193	72235.7	122452	79965.2	79985.7	67084.4	65851.4	80207.4	85615.7	63116.3
M180T37	179.936	36.9	0.6	113771	156238	169509	168772	152848	172827	40968.5	163121	182128	126229	213676	36247.2	92890.7	159545	41288.2	123895	155155	140010	145637	165498	128335	174177	174233	170475	197716	144529	143205	152683	143090	143600	152849
M180T384	180.03	384.1	6.4	77564.5	790939	145990	177934	52005	57870.6	161103	81632.2	36147	503678	40375.1	55208.9	190961	141796	214831	150970	63365.5	7410.07	701517	850630	84867.7	57070.2	4196.28	304815	204682	230349	229204	240562	230167	223789	222343
M180T391	180.066	391.3	6.5	684300	935790	607159	642248	622891	887941	715326	622639	523321	814764	878619	266363	696203	778747	456573	547784	357206	748275	624988	471229	672485	792083	582094	700682	630266	630316	530397	613627	629899	628188	629904
M180T426	180.111	426.3	7.1	45156.4	36442.6	41898.6	39805.9	63412.1	20268.8	46187.9	61591.1	28096.4	16107.8	21773.3	31686.5	47998.9	35362	2888.91	42534.9	63780.7	32537.9	26701.2	6117.64	46571.3	38106	43217.5	30707.9	47418.5	45092.3	61594.6	56113.6	51559.7	49756.9	39637.1
M180T444	180.111	444.3	7.4	44371.5	41034.4	41498.3	19734.6	40679.6	44334.2	38898.7	42960.4	33614.2	54244.1	46806.8	48273.3	34728.8	59109.5	52775.2	47862.3	43215.8	49705.9	30274.1	45685	52422.6	42515.9	34864.3	53442.8	36715.1	37566.5	36701.4	39862.6	39873.7	39857.6	37256.7
M180T511	180.103	511.3	8.5	234305	381271	268515	384977	152426	484737	121360	462694	246557	118299	377535	230309	89717.5	400801	562817	144011	98445.9	86747.1	328642	104635	373675	410661	264388	103952	238612	238269	238984	164986	198663	241895	170251
M180T57	179.936	57.2	1	57709	54264.1	58742.7	51327.2	62536	53420.8	61778.3	60312.8	46625.9	60705.9	53658	49756.8	57666.2	62869.7	64448.5	16147.7	56412.3	48725.6	87128.5	62107.8	45556.1	91297.5	54680.8	77504.7	55065.4	50904.8	52418.5	49086.4	52536.5	47499.4	36574.5
M180T737	180.075	736.9	12.3	202273	38627.3	45623.8	231103	27501.5	15042.8	146844	178219	156139	322470	256556	42359.2	186104	501210	274063	383116	376844	514229	225410	217700	468684	82340.8	161136	649927	69845.1	204303	220554	252692	218971	202190	219669
M180T744	180.184	743.9	12.4	290595	194152	425936	586772	515499	595146	210882	775210	846737	335065	139213	614485	243754	209875	695969	622806	271622	247391	592996	501061	365243	368389	671926	210573	318608	471618	309484	352835	363321	360667	319105
M180T91	180.059	90.5	1.5	2.15582e+06	918149	2.76665e+06	1.50295e+06	5.84959e+06	2.56895e+06	4.04012e+06	2.90696e+06	4.05016e+06	4.04849e+06	4.55517e+06	2.61727e+06	5.33115e+06	3.50242e+06	3.44107e+06	3.47009e+06	3.46554e+06	1.98473e+06	2.98326e+06	2.99319e+06	3.01124e+06	2.69591e+06	2.94469e+06	1.6705e+06	3.0189e+06	3.15903e+06	2.95803e+06	3.00611e+06	3.07502e+06	3.0061e+06	3.006e+06
M180T99	180.034	98.9	1.6	6.40109e+07	1.73408e+07	7.47714e+07	3.03734e+07	2.06942e+08	6.49992e+07	1.34024e+08	6.71063e+07	1.12061e+08	1.2245e+08	1.23511e+08	6.51097e+07	1.58021e+08	1.06089e+08	9.73381e+07	9.54927e+07	9.7511e+07	5.95375e+07	8.02939e+07	8.64732e+07	8.74235e+07	7.56525e+07	8.0934e+07	3.95087e+07	9.0359e+07	8.98962e+07	9.11295e+07	8.97142e+07	8.62762e+07	8.84723e+07	8.86345e+07
M181T104	180.879	103.7	1.7	82995.3	57069.4	59537	72438.5	120042	141274	66275.7	81873.6	124916	148547	110938	121175	367665	107884	200852	142993	72265.5	136361	122794	64989.1	115992	97048.8	217334	90457.6	133967	138402	138425	123883	154109	116877	127416
M181T108	181.017	108.3	1.8	299626	231678	269106	189332	281380	181336	296730	187302	315521	281100	347006	309077	382874	236743	301718	258558	254357	242375	380374	314195	260103	287971	259157	304466	272597	285610	272374	226275	266655	264362	270648
M181T122_1	181.05	122.2	2	4.7177e+06	6.36546e+06	3.92017e+06	7.36595e+06	4.66228e+06	5.14284e+06	3.83272e+06	1.67642e+06	8.37098e+06	5.95205e+06	6.57561e+06	6.7524e+06	1.23555e+07	3.66833e+06	6.26213e+06	5.51717e+06	5.38206e+06	1.06498e+07	5.03075e+06	2.79852e+06	2.92393e+06	6.29605e+06	1.1785e+07	8.33679e+06	6.99053e+06	6.19915e+06	7.32567e+06	7.34618e+06	8.21608e+06	6.38722e+06	7.47195e+06
M181T122_2	181.07	122	2	6.66401e+06	3.78321e+06	7.00309e+06	3.62627e+06	4.75031e+06	1.33527e+07	1.14869e+07	5.87641e+06	1.05956e+07	1.10242e+07	1.14036e+07	8.5097e+06	1.04316e+07	7.3509e+06	6.73985e+06	1.13359e+07	9.20093e+06	4.91364e+06	1.91652e+07	2.48869e+07	1.48781e+07	1.09929e+07	7.20334e+06	7.92677e+06	1.02915e+07	9.85227e+06	1.032e+07	9.84251e+06	1.03305e+07	1.11451e+07	7.22447e+06
M181T143	180.9	142.8	2.4	315645	445805	534793	172200	428557	352084	283921	365398	325830	502204	404794	484528	189369	390794	162287	470192	424301	567415	351666	285682	450146	474188	485346	282365	305568	304848	360086	402180	361184	348124	292164
M181T154	181.05	153.8	2.6	1.49372e+06	1.98545e+06	1.46749e+06	1.8839e+06	2.49994e+06	1.3085e+06	1.33545e+06	1.9899e+06	4.29272e+06	3.49946e+06	4.90017e+06	1.40041e+06	3.18978e+06	1.607e+06	2.28651e+06	1.94359e+06	1.58249e+06	9.34762e+06	2.3385e+06	2.40301e+06	1.82174e+06	1.07585e+07	1.01066e+07	7.65001e+06	2.15125e+06	2.79155e+06	2.58302e+06	2.78223e+06	3.11848e+06	1.84635e+06	2.77822e+06
M181T279	181.037	278.8	4.6	120524	144996	32049.6	183690	93115	154784	102364	40241.6	359407	410366	293732	376749	423708	291214	400966	363667	159093	453212	181085	108145	170268	304614	349693	342106	233332	230806	230917	245425	240496	233344	230914
M181T303	181.037	302.9	5	8914.93	27740.8	9816.77	172923	68476.7	58257	22328.6	29133.8	174052	129369	98489	99946.3	354743	163675	193948	221223	175636	369594	289322	215846	201548	136462	141380	168040	139159	139841	176903	139677	139609	165314	147282
M181T363	181.087	363.1	6.1	1.37012e+06	2.43281e+06	839440	2.17798e+06	1.73965e+06	919098	572049	576122	645866	178302	637592	240009	755113	66094.4	61976.6	145207	547417	568495	979998	957638	383178	389708	445516	747188	810267	810857	776843	788060	774398	660851	817599
M181T368	180.9	368.1	6.1	213894	248007	208024	290707	138751	172550	201041	180989	174881	79955.6	240196	143586	57430.2	151293	141250	134664	113282	66549.3	144594	136323	126595	118869	98932.4	123440	153772	142840	116470	175576	136984	137245	136965
M181T40	180.935	39.7	0.7	273828	228930	349609	227901	161949	149684	164155	354072	297358	376912	403279	467284	429958	427704	367178	473042	261912	339695	316347	253356	413574	336131	300238	395198	308328	363107	351263	308669	309600	305347	324330
M181T51	180.9	51.2	0.9	385670	419607	342192	466086	343199	331555	458433	341813	2.30236e+06	2.29416e+06	1.87759e+06	1.64793e+06	1.78707e+06	1.3506e+06	1.93832e+06	1.93936e+06	318393	2.21597e+06	466992	378036	309734	1.21467e+06	1.12465e+06	1.0267e+06	1.03259e+06	1.09229e+06	1.20174e+06	1.09375e+06	1.40442e+06	1.09704e+06	1.10706e+06
M181T545	180.989	545.4	9.1	1.45176e+07	8.62801e+06	7.89043e+06	2.23043e+07	2.07655e+07	7.32497e+06	2.0633e+07	1.64819e+07	1.85014e+07	1.02669e+07	1.30681e+07	2.57643e+07	1.36391e+07	2.14352e+07	1.95987e+07	3.35151e+07	2.98208e+07	1.06888e+07	1.07976e+07	3.29068e+07	2.82513e+07	2.35962e+07	1.23975e+07	9.39838e+06	1.86239e+07	1.83118e+07	1.83349e+07	1.83216e+07	1.62514e+07	1.61165e+07	1.61996e+07
M181T709	180.989	708.6	11.8	4.36104e+06	2.97126e+06	2.52886e+06	6.02837e+06	5.21306e+06	7.30384e+06	5.59356e+06	4.09446e+06	5.20436e+06	6.66943e+06	3.55566e+06	5.45744e+06	3.2189e+06	6.30621e+06	4.19765e+06	4.25963e+06	2.0686e+06	2.26379e+06	1.89515e+06	3.70925e+06	4.05131e+06	3.21914e+06	3.10618e+06	5.6866e+06	4.17182e+06	4.37019e+06	2.85552e+06	4.36512e+06	4.37748e+06	4.3765e+06	4.17122e+06
M181T710	181.16	709.7	11.8	302494	479781	356355	500085	78428.9	254615	98782.5	153302	518306	169052	263359	269104	143562	420499	575744	436043	337281	425245	422256	554524	550100	298681	237742	336152	330143	368889	402940	368823	368999	359108	350123
M181T75	180.981	75.5	1.3	1.95176e+06	2.43615e+06	1.84462e+06	1.61849e+06	1.53238e+06	1.23123e+06	1.54624e+06	1.28204e+06	1.98066e+06	2.01379e+06	2.19328e+06	2.24186e+06	1.69383e+06	1.70272e+06	2.34243e+06	1.78493e+06	1.82349e+06	1.68897e+06	1.80738e+06	1.85023e+06	1.61186e+06	2.66565e+06	2.05391e+06	2.62243e+06	1.78097e+06	1.77603e+06	1.80971e+06	1.80763e+06	1.81218e+06	1.58294e+06	1.7629e+06
M181T84	180.973	84.1	1.4	2.72848e+07	4.6134e+06	1.47107e+07	2.00944e+07	2.65267e+07	1.49509e+07	1.74035e+07	2.32532e+07	3.03801e+07	9.22622e+06	8.85003e+06	3.74993e+07	3.31813e+07	2.46344e+07	2.1155e+07	1.35123e+07	2.24609e+07	1.17862e+07	3.82195e+07	3.91583e+07	5.86227e+06	2.41243e+07	2.69383e+07	2.9269e+07	2.19076e+07	2.19225e+07	1.81728e+07	2.18609e+07	2.19304e+07	1.75969e+07	1.51401e+07
M181T87	181.029	86.7	1.4	1.76454e+06	1.79977e+06	1.90971e+06	2.11798e+06	1.92553e+06	1.66248e+06	1.70094e+06	1.9346e+06	1.64813e+06	1.87858e+06	2.48613e+06	1.58928e+06	1.72639e+06	1.88609e+06	1.78812e+06	1.65537e+06	1.81322e+06	2.04731e+06	1.64343e+06	2.79761e+06	1.67095e+06	1.7525e+06	1.88013e+06	1.72406e+06	1.72489e+06	1.75569e+06	1.60658e+06	1.73254e+06	1.61697e+06	1.60793e+06	1.44756e+06
M181T99	181.037	98.9	1.6	5.27993e+06	5.40943e+06	5.19105e+06	5.85439e+06	5.09584e+06	4.61397e+06	3.79466e+06	4.6692e+06	3.89662e+06	2.49187e+06	3.70264e+06	4.32187e+06	5.85458e+06	2.95346e+06	4.65358e+06	3.53557e+06	4.436e+06	4.07156e+06	6.05399e+06	4.1556e+06	3.84735e+06	4.70701e+06	4.81905e+06	4.01533e+06	4.49607e+06	4.55966e+06	4.73062e+06	4.55929e+06	5.00115e+06	4.56764e+06	4.68725e+06
M182T121	181.995	121.3	2	2.10801e+07	2.30594e+07	1.74653e+07	3.59063e+07	1.62818e+07	1.46418e+07	1.75036e+07	1.88605e+07	3.81185e+06	5.29657e+06	5.84327e+06	5.43704e+06	2.93747e+06	6.5967e+06	3.43753e+06	3.37904e+06	2.74971e+07	2.58257e+06	3.05231e+07	2.17546e+07	2.24437e+07	5.85553e+06	6.10451e+06	1.14151e+07	1.57014e+07	1.53821e+07	1.3632e+07	1.69652e+07	1.78775e+07	1.53919e+07	1.54039e+07
M182T122_1	182.013	121.7	2	7.13676e+07	4.95696e+07	6.59618e+07	5.29832e+07	4.69542e+07	3.95368e+07	4.25685e+07	4.39332e+07	2.83674e+07	1.42096e+07	6.71908e+07	4.29465e+07	2.37578e+07	4.97786e+07	3.05689e+07	3.93719e+07	7.21884e+07	2.79673e+07	4.7899e+07	4.82589e+07	5.37082e+07	5.96447e+07	3.00553e+07	6.3449e+07	4.69257e+07	3.91193e+07	4.137e+07	4.63448e+07	4.84856e+07	4.45412e+07	5.05075e+07
M182T122_2	182.046	121.6	2	98377.2	241250	3.09761e+06	83198	889275	123461	114858	41750.8	2.40243e+06	5.47331e+06	2.9197e+06	4.5414e+06	4.29767e+06	4.99361e+06	2.77553e+06	4.28346e+06	1.20634e+06	2.19079e+06	134587	202910	62133.5	1.88106e+06	1.74823e+06	3.09298e+06	1.68477e+06	1.70428e+06	1.83423e+06	1.87818e+06	1.86842e+06	1.87205e+06	1.871e+06
M182T126	182.094	126	2.1	1.06311e+06	398881	739178	472544	1.17531e+06	847019	918648	1.15742e+06	1.04012e+06	829191	850048	919383	1.06487e+06	1.35841e+06	737729	1.08047e+06	1.47181e+06	758397	1.48062e+06	973225	1.00728e+06	1.10176e+06	1.27871e+06	943421	1.05162e+06	997205	976006	969035	965474	978763	965609
M182T155	182.046	154.6	2.6	824841	1.01169e+06	615600	1.13653e+06	775281	1.08557e+06	780250	928909	1.19891e+06	1.09217e+06	1.07344e+06	1.01124e+06	581933	1.49089e+06	837832	1.22318e+06	944344	1.00255e+06	1.34548e+06	1.51115e+06	1.29711e+06	973575	1.00657e+06	1.05482e+06	981799	1.13385e+06	1.034e+06	1.00204e+06	959515	1.02716e+06	950101
M182T314_1	181.514	314.1	5.2	71514.3	76249.9	73437.6	135243	57167.7	9692.25	106454	71963	49551.4	76977.7	78514.4	55391.2	321638	59686.6	58439.5	82265.6	113566	330823	137041	62442.6	81083.9	57681.2	67177.7	123003	109601	100895	117641	118646	118503	125082	114728
M182T314_2	182.01	313.7	5.2	31664.8	121074	32871.9	108457	34307.5	209056	114120	34899.7	121888	100537	241278	131229	112103	78958.2	44160.3	136954	202528	131584	256596	91004	142895	105895	273177	33509.5	91856.7	120996	119158	71502.1	118790	117175	159843
M182T374	182.01	374.2	6.2	482601	508086	567801	659980	525262	556333	458166	556340	669978	665655	710868	727314	618670	651585	707047	718412	543072	674648	650825	702323	545901	649514	626293	518360	584053	583496	585063	603408	642357	547129	601810
M182T393	182.046	393.4	6.6	1.56147e+06	1.05291e+06	1.63781e+06	3.49016e+06	1.82016e+06	497609	1.10629e+06	1.85236e+06	2.93607e+06	2.85878e+06	1.27462e+06	1.60498e+06	1.43163e+06	1.16755e+06	1.41059e+06	1.40173e+06	479505	1.24554e+06	742742	995480	1.63051e+06	3.45109e+06	1.54358e+06	1.6246e+06	694969	1.71256e+06	1.64532e+06	1.32213e+06	1.71009e+06	1.71026e+06	1.71489e+06
M182T407	182.119	407.5	6.8	14260.5	13561.7	13532.5	41499.6	16706.2	18170.7	10027.6	20792.2	45823.4	228800	21218.3	37641.7	233636	130905	186781	248491	264742	571847	96208.3	20464.4	199922	25965.8	296757	210528	124693	124487	128431	129643	128579	126726	105271
M182T462	182.046	462.4	7.7	434856	1.1411e+06	1.4086e+06	901286	1.66304e+06	1.41954e+06	2.1993e+06	1.48242e+06	504013	696004	1.15564e+06	826361	259189	690932	1.50822e+06	643510	1.36853e+06	851934	798014	868854	1.30132e+06	959698	485001	716168	1.10264e+06	1.24455e+06	994104	997522	996120	1.4068e+06	996510
M182T477	182.01	477.4	8	316873	218478	383762	285187	407110	448959	437381	493205	555462	537439	358543	624004	422561	466552	537680	611606	472219	572507	416166	521575	414850	508436	648377	551174	440988	191170	443454	413157	441038	440026	440738
M182T546	181.993	545.6	9.1	702474	664348	809928	761350	388554	465935	263337	770521	850329	1.00833e+06	752602	907840	1.08033e+06	1.20022e+06	1.10116e+06	499270	738058	612849	368275	468927	738019	686776	840148	687814	573071	766116	766296	578505	754876	755425	755301
M182T549	182.119	549.3	9.2	94398.7	85941.3	101254	97402.7	48445.7	33378.1	75158.6	89097.2	115373	122966	78377	117768	71094	101311	97205.5	94674.9	83306.3	73460.3	103001	82073.9	89081.4	88523.4	109734	84751.5	83451	80397	89233.4	84791	84265.6	88694.8	103220
M182T66	182.021	65.7	1.1	83928.8	26828.7	114295	154797	146127	123889	165356	292541	52660.4	113533	123977	69505.5	150681	24765.7	122735	84068	112569	149415	170777	63748.1	96134.7	29614.2	20644.5	40097.1	82356	84180	98592	107215	55878.3	104374	104541
M182T81	182.013	80.6	1.3	1.30915e+07	1.19693e+07	1.26525e+07	1.25437e+07	1.60953e+07	9.20236e+06	1.52065e+07	1.68809e+07	8.75878e+06	7.37878e+06	6.40838e+06	4.91656e+06	1.12013e+07	7.09856e+06	8.93714e+06	9.56994e+06	1.37967e+07	1.35119e+07	2.60741e+07	2.40068e+07	1.8439e+07	1.17114e+07	1.05261e+07	1.08745e+07	1.2752e+07	1.28106e+07	1.27467e+07	1.25354e+07	1.30694e+07	1.25356e+07	1.25338e+07
M182T84	181.966	84.2	1.4	2.09548e+07	2.02856e+07	2.14085e+07	2.39039e+07	2.3068e+07	2.34341e+07	2.27012e+07	2.34856e+07	2.39981e+07	2.17036e+07	2.41224e+07	2.46474e+07	2.47946e+07	1.96708e+07	2.14162e+07	4.52471e+07	2.65012e+07	2.38598e+07	2.22135e+07	2.49804e+07	2.55629e+07	2.63212e+07	2.76072e+07	2.40028e+07	2.14878e+07	2.12697e+07	2.01741e+07	2.22574e+07	2.23531e+07	2.18251e+07	2.15021e+07
M182T90	182.075	89.6	1.5	664329	967068	899204	829652	1.24567e+06	1.44202e+06	817568	852010	1.01609e+06	679595	821714	1.10328e+06	917403	693858	836275	796139	533735	498844	680474	800760	613916	762698	783569	475023	820922	781501	810002	796757	768158	781006	780419
M182T99_1	182.029	98.9	1.6	3.64713e+06	3.34541e+06	1.87661e+06	6.36801e+06	2.91015e+06	4.68344e+06	1.62767e+06	1.88028e+06	5.21576e+06	1.89863e+06	3.28897e+06	4.58856e+06	5.65805e+06	3.21239e+06	3.30477e+06	4.17568e+06	2.98289e+06	7.85091e+06	4.45651e+06	2.67333e+06	1.47932e+06	4.30939e+06	301897	4.45653e+06	3.51796e+06	3.56401e+06	3.85549e+06	3.514e+06	3.83406e+06	3.56912e+06	3.83066e+06
M182T99_2	182.049	98.9	1.6	932318	1.47863e+07	752148	1.20162e+07	1.25345e+06	970936	3.21619e+06	637492	4.46145e+06	1.5973e+06	907282	1.07035e+06	579349	2.45187e+06	939487	856467	5.74104e+06	5.70833e+06	7.95542e+06	965617	3.17252e+06	788992	9.48153e+06	4.53052e+06	2.10415e+06	2.03007e+06	3.49319e+06	1.98639e+06	3.07967e+06	3.04274e+06	2.12669e+06
M183T108	183.006	107.5	1.8	5.01172e+06	3.96229e+06	5.46205e+06	3.28137e+06	4.32209e+06	3.05379e+06	5.66398e+06	2.59144e+06	5.63004e+06	4.37399e+06	5.70181e+06	4.2567e+06	4.31734e+06	4.33909e+06	3.62857e+06	5.0312e+06	4.29611e+06	4.04021e+06	3.38746e+06	5.08897e+06	5.70887e+06	5.82953e+06	6.90142e+06	3.35259e+06	4.13089e+06	4.36165e+06	4.15049e+06	3.45881e+06	4.50029e+06	4.34763e+06	4.20522e+06
M183T121	182.998	121	2	342045	375611	373454	381628	378928	322258	368812	429951	384397	344586	411930	392593	348797	401847	390980	581312	416066	339834	369861	368879	393620	437243	462446	344773	344609	389050	406500	396453	399420	389046	389158
M183T122	183.016	121.7	2	2.78136e+06	2.6203e+06	2.08552e+06	2.43658e+06	4.24375e+06	4.0271e+06	2.20917e+06	2.57784e+06	2.39183e+06	2.55887e+06	2.46949e+06	2.3196e+06	2.35119e+06	2.20324e+06	1.56422e+06	2.01394e+06	3.57021e+06	2.01819e+06	2.39275e+06	3.49212e+06	2.76836e+06	1.84523e+06	2.59751e+06	2.77969e+06	2.35917e+06	1.64156e+06	1.61297e+06	1.95871e+06	1.87532e+06	1.80906e+06	1.59961e+06
M183T31	182.879	30.6	0.5	101895	86006.5	104782	99756.8	131050	99973.1	82971.4	84046.9	139539	190064	91940.6	114607	69598.1	58015.3	85688.2	56363.2	124398	240449	192638	180069	116630	127767	179096	141740	104472	105625	104390	107568	115859	125039	104389
M183T336	183.049	335.7	5.6	2.62526e+06	3.12644e+06	2.37257e+06	1.56492e+06	524310	2.6797e+06	2.60053e+06	3.35335e+06	1.85701e+06	299671	2.59544e+06	449471	264125	228437	247622	325036	133835	162592	217358	1.49349e+06	245073	1.70288e+06	105008	257374	1.47801e+06	1.55717e+06	1.37904e+06	1.51768e+06	1.41742e+06	1.42007e+06	1.27768e+06
M183T394	183.049	393.6	6.6	3852.81	11630.4	1896.05	8533.82	126286	84123.2	58796.6	64286.8	459157	52451.5	105684	64475.3	11421.7	175623	81842.1	82003.6	78753.2	111172	111751	118247	53310.4	255145	405498	257109	103172	97883.5	98330.5	102564	134468	98233.1	103237
M183T465	183.104	464.7	7.7	1.11149e+06	1.88894e+06	3.28631e+06	1.60875e+06	883732	2.18203e+06	2.69916e+06	4.82729e+06	317720	209213	2.26123e+06	980853	138015	286113	289044	841335	194072	696709	204370	5.29958e+06	367817	2.85838e+06	125510	289954	1.55357e+06	1.65853e+06	1.52875e+06	1.52771e+06	1.5276e+06	1.57054e+06	1.52839e+06
M183T474	183.139	474.4	7.9	119979	169400	116175	211814	120743	159056	210874	165510	6083.37	74129	16952.3	164736	96685.8	164674	35819.8	18677.5	186174	108735	265574	39984.5	20652	24769.2	79513.7	6354.02	79072.5	78057.7	78087.6	53210.4	66993.5	78230.7	66022.5
M183T503	183.103	503.4	8.4	274388	308004	283905	1.80307e+06	470812	190994	1.40673e+06	256704	1.42458e+06	1.50514e+06	552066	2.16549e+06	7.6377e+06	399713	342103	2.41326e+06	1.91233e+06	7.95178e+06	3.85431e+06	211039	477201	357167	1.63181e+06	3.02762e+06	2.26796e+06	2.27387e+06	2.31111e+06	2.27878e+06	2.92589e+06	2.4458e+06	2.24354e+06
M183T548	183.139	547.6	9.1	2519.56	12356.7	9689.07	9219.61	4129.73	1312.09	1569.92	25971	5997.14	1.03969e+06	376019	573193	11296.4	105586	122902	145939	14284.2	84805.2	85002.4	53140.1	79041.8	30774.6	49484.2	41094.3	108380	101746	101845	108390	108366	54835.7	104613
M183T55_1	182.897	54.9	0.9	299850	242549	306571	247154	372706	340365	66664	285718	407121	303469	77405.1	78451.9	52632.1	234483	314345	265815	108217	231306	429840	444252	74593	86813.6	357932	290569	299806	298354	278354	271361	297572	98167.5	299480
M183T55_2	182.933	55.2	0.9	201640	502566	348178	50029.4	230886	412572	426855	197276	225092	454801	114010	402253	157359	95218.9	125586	500343	133421	195435	184245	119611	75534.1	223191	131714	104145	239912	230035	297172	241756	166010	153552	158816
M183T576	182.988	576	9.6	1.9381e+08	8.87594e+07	2.02441e+08	1.55604e+08	2.75318e+08	3.03031e+07	1.11408e+08	2.07118e+08	1.35974e+08	1.51385e+08	1.65685e+08	9.35093e+07	1.07972e+08	1.1335e+08	8.8703e+07	1.59612e+08	1.60674e+08	1.65785e+08	1.33821e+08	2.95189e+07	1.14095e+08	1.31309e+08	1.01213e+08	1.24592e+08	8.39361e+07	8.34765e+07	7.31948e+07	8.38063e+07	7.80149e+07	6.73896e+07	7.77338e+07
M183T695	182.99	694.9	11.6	3.94872e+07	2.62043e+07	1.72138e+07	1.78807e+07	1.6421e+07	4.56169e+07	1.2539e+07	1.46833e+07	1.30507e+08	6.96029e+07	3.96899e+07	1.72166e+08	1.39748e+08	5.97437e+07	2.35934e+08	8.28881e+07	2.44237e+07	2.21567e+08	6.42089e+06	8.01224e+06	3.50284e+07	8.46574e+07	5.26984e+07	1.19038e+08	6.24305e+07	4.87874e+07	6.71193e+07	6.15622e+07	3.91664e+07	5.78296e+07	5.71656e+07
M183T71	182.97	71.5	1.2	146002	164854	272906	150887	146765	246381	132954	262714	188993	173260	170104	171581	157121	177704	210139	155721	297135	153097	222324	322868	264443	202965	185313	163250	161412	161821	172329	163509	163530	154483	161392
M183T735	182.988	735.2	12.3	4.44497e+08	8.72889e+08	9.46964e+08	6.23317e+08	4.86329e+08	6.9095e+08	5.86854e+08	3.032e+08	1.5214e+09	1.37817e+09	2.19764e+09	9.86384e+08	1.81738e+09	2.40644e+09	1.82742e+09	2.89555e+09	7.76533e+08	1.56784e+09	1.03644e+09	2.04857e+09	7.07342e+08	5.62501e+08	6.40435e+08	8.71428e+08	1.62498e+09	1.62694e+09	2.13077e+09	1.72726e+09	1.81909e+09	1.68854e+09	1.17154e+09
M183T75_1	182.51	75.4	1.3	3.6969e+07	3.03555e+07	3.25884e+07	4.81959e+07	4.41748e+07	3.59345e+07	2.47067e+07	2.72723e+07	9.206e+06	1.04648e+07	1.05418e+07	1.02869e+07	1.11299e+07	9.16283e+06	1.14259e+07	1.01693e+07	3.23695e+07	1.05004e+07	4.72559e+07	4.42873e+07	4.59403e+07	1.83439e+07	8.52362e+06	1.11422e+07	1.85043e+07	2.09494e+07	2.31658e+07	1.41701e+07	1.62981e+07	1.63107e+07	1.8437e+07
M183T75_2	183.011	75.3	1.3	1.30621e+06	1.04786e+06	614088	470340	2.18387e+06	519739	759116	736220	1.77888e+06	1.52184e+06	662173	1.92478e+06	1.59228e+06	754934	1.91963e+06	1.89902e+06	2.10907e+06	1.6273e+06	2.65585e+06	929590	368969	1.04851e+06	448422	1.83917e+06	732221	918207	1.46801e+06	1.56428e+06	1.5798e+06	1.1307e+06	1.48591e+06
M183T765	182.989	765.4	12.8	6.58516e+08	4.25359e+08	9.64411e+08	1.14507e+09	1.07407e+09	6.7193e+08	9.68173e+08	4.12139e+08	5.42671e+08	8.92814e+08	5.44843e+08	8.88332e+08	5.77543e+08	9.54549e+08	5.65618e+08	1.0665e+09	3.3118e+08	1.24631e+09	8.3805e+08	9.91953e+08	1.05446e+09	4.5931e+08	3.90861e+08	9.02209e+08	9.57382e+08	6.93166e+08	1.31808e+09	8.85249e+08	1.13431e+09	1.19012e+09	5.98122e+08
M183T781	182.988	781	13	8.83134e+08	9.20169e+08	4.32229e+08	6.85185e+08	5.45622e+08	7.73915e+08	5.55767e+08	9.407e+08	5.5968e+08	1.02614e+09	6.8424e+08	1.06941e+09	7.00377e+08	1.86308e+09	5.31519e+08	1.39677e+09	1.34563e+09	1.07043e+09	8.97874e+08	6.56582e+08	1.15855e+09	1.06333e+09	1.29784e+09	5.51253e+08	6.12418e+08	4.46548e+08	6.08929e+08	7.53776e+08	5.7437e+08	5.97048e+08	5.67121e+08
M183T794	183.139	793.9	13.2	281612	249909	967717	1.9822e+06	2.10405e+06	2.73536e+06	28454.7	1.1114e+06	484742	2.29004e+06	650342	287187	399353	295300	440269	361746	196814	3.717e+06	886908	111168	2.02984e+06	582330	2.35715e+06	2.54775e+06	1.41569e+06	1.42043e+06	1.43462e+06	1.30779e+06	1.32893e+06	929013	1.60409e+06
M183T837	182.988	836.9	13.9	1.94321e+08	5.41982e+08	1.91436e+08	2.7636e+08	5.06626e+08	3.50184e+08	2.33682e+08	2.63567e+08	3.6846e+08	3.04866e+08	3.96551e+08	2.51954e+08	1.97897e+08	4.08743e+08	4.06114e+08	1.13991e+08	4.95857e+08	3.16915e+08	5.19969e+08	2.31963e+08	5.74909e+08	2.29042e+08	2.60381e+08	4.68084e+08	2.91171e+08	4.2456e+08	4.14627e+08	4.10601e+08	3.54509e+08	3.93997e+08	3.7539e+08
M183T99	183.006	98.8	1.6	4.90041e+06	5.38149e+06	4.15723e+06	8.62798e+06	4.77935e+06	5.05622e+06	4.4471e+06	3.48301e+06	6.31105e+06	7.34308e+06	5.92031e+06	4.61577e+06	6.23143e+06	7.05899e+06	7.78104e+06	7.66735e+06	5.28185e+06	5.46043e+06	5.56508e+06	3.35919e+06	4.43161e+06	5.29719e+06	5.0306e+06	7.32182e+06	4.41157e+06	4.22294e+06	6.21755e+06	5.25533e+06	4.82735e+06	4.81483e+06	5.3137e+06
M184T104	183.848	104.3	1.7	403376	371628	457322	531212	231993	190375	238540	452181	309290	417167	232518	218995	413500	224680	322409	307567	550234	431676	284484	484108	376322	258224	242420	239652	247391	313707	262246	247222	261634	263555	231066
M184T107_1	184.061	106.5	1.8	8.19299e+06	5.44107e+06	1.04382e+07	1.10908e+07	9.13611e+06	1.01094e+07	9.74314e+06	1.79527e+07	7.14747e+06	6.09982e+06	1.05962e+07	6.80982e+06	5.79941e+06	1.14876e+07	5.84844e+06	2.26549e+06	2.43665e+06	9.14189e+06	1.1671e+07	4.57288e+06	1.22917e+07	7.52427e+06	1.06445e+07	9.62853e+06	8.74811e+06	8.96467e+06	8.07717e+06	8.9671e+06	8.96284e+06	9.13963e+06	8.74065e+06
M184T118	184.073	118.1	2	3.94744e+07	3.56672e+07	4.05983e+07	3.26261e+07	3.61903e+07	3.49219e+07	4.57152e+07	3.39437e+07	4.30426e+07	4.53998e+07	3.75627e+07	3.47926e+07	3.56649e+07	4.42948e+07	4.8105e+07	4.07112e+07	4.4897e+07	3.63999e+07	4.4103e+07	4.7469e+07	5.26906e+07	4.19018e+07	3.33088e+07	4.34036e+07	3.90555e+07	3.90487e+07	3.90602e+07	4.06609e+07	3.96699e+07	3.96738e+07	3.58439e+07
M184T121_2	184.025	120.9	2	451454	538674	488034	395621	466508	487973	637107	718458	490420	825999	662238	909464	470488	793111	701768	517569	746290	458677	687153	777050	727720	590409	484274	636528	532582	509746	536794	575594	516350	541011	513666
M184T122_1	184.008	121.6	2	354232	561274	351353	1.10759e+06	355027	187599	795716	246554	1.68124e+06	3.58263e+06	2.53108e+06	2.52099e+06	377700	1.43114e+06	2.66654e+06	2.47965e+06	251234	1.3565e+06	359158	458822	1.33621e+06	2.4665e+06	2.03939e+06	3.93129e+06	948025	1.86555e+06	1.95853e+06	1.35779e+06	1.74689e+06	1.8499e+06	1.85219e+06
M184T122_2	184.061	122.2	2	2.81766e+06	1.95736e+06	1.93118e+06	2.57187e+06	2.83112e+06	3.10847e+06	2.77854e+06	2.62443e+06	2.06702e+06	2.43417e+06	2.17001e+06	2.09285e+06	2.96999e+06	3.7164e+06	2.17997e+06	3.49296e+06	5.97395e+06	5.84496e+06	8.23049e+06	2.60434e+06	4.78819e+06	2.71442e+06	7.84451e+06	3.6596e+06	3.19396e+06	3.56212e+06	3.19396e+06	3.19386e+06	3.19437e+06	3.33653e+06	3.37575e+06
M184T148	184.062	148	2.5	509118	98872.6	111582	334819	1.0072e+06	935789	98251.4	140900	969617	1.01438e+06	800237	777587	2.93043e+06	617581	1.44131e+06	789145	286646	1.06288e+06	992604	116973	699495	555101	1.55179e+06	452419	923658	971924	848721	669475	1.09855e+06	979159	895959
M184T336	184.05	335.8	5.6	399281	77322.2	346719	460713	86127.7	114347	547708	107523	149476	402576	377271	88419.3	536166	76474.6	159244	1.5066e+06	106259	330457	460082	609548	603798	566100	563275	455594	190632	116551	176705	115531	117344	119499	143725
M184T373	184.098	373.1	6.2	7.24512e+06	7.20911e+06	9.75235e+06	3.09003e+06	1.21337e+07	1.06686e+07	9.00761e+06	7.33812e+06	7.27295e+06	2.38151e+06	2.51702e+06	9.58769e+06	7.47562e+06	2.10841e+06	4.96642e+06	5.40929e+06	1.65472e+06	4.36873e+06	7.29662e+06	2.34224e+06	1.58172e+06	7.90144e+06	2.21174e+06	4.59307e+06	6.19497e+06	6.96124e+06	6.18006e+06	6.21349e+06	3.61715e+06	4.64478e+06	6.29489e+06
M184T374	184.007	374.2	6.2	208482	160080	152435	210069	163459	21807.4	39750.4	169075	170456	129311	42539.1	121588	220456	199466	192156	201944	181320	271556	286348	196801	202000	197021	187044	292205	71012	152098	149678	160837	160499	150342	186691
M184T407	184.044	407	6.8	49700.2	82566.2	35917.3	41643.1	14461.5	23942.4	47213.6	26859.7	38521.9	139972	83134.1	106339	122043	106018	122359	161346	55733.1	83162.6	119654	142102	64387.5	47785.8	36011.5	92044.1	67350.9	59029.4	67536.9	74088.3	70526.8	70767.6	67643.9
M184T463	184.008	463	7.7	20292.8	22321	26335.3	20464.6	24555.1	22923.3	28009.9	25509.6	26826.7	14811.5	32466.6	37109.6	33812.3	39543.6	29533.3	33919.4	36358.7	24271.1	41294.3	45187.5	21174.1	25704.9	22556.5	34052.8	29922.1	28504.3	29830.1	29831.9	29805.9	18947.5	29806.1
M184T465	184.106	464.9	7.7	24301.5	20811.4	25955.9	19959.1	24696.8	6760.59	26508.2	22956.9	234486	181370	198957	464328	179245	391142	273315	365063	179832	59870.4	251464	251601	113305	213728	185442	44697.8	153177	134350	161939	221004	169121	168718	162037
M184T69	183.996	69.2	1.2	1.88972e+06	1.37953e+06	1.65827e+06	891318	1.93918e+06	1.27729e+06	1.66758e+06	1.27746e+06	1.27499e+06	1.12064e+06	772275	864595	1.2305e+06	1.08764e+06	1.2968e+06	1.29147e+06	1.75484e+06	1.34498e+06	1.83863e+06	1.6932e+06	1.46145e+06	915232	1.21034e+06	1.60029e+06	1.19928e+06	1.25708e+06	1.20871e+06	1.26908e+06	867155	1.19951e+06	1.29786e+06
M184T84	183.963	84.2	1.4	8.01456e+06	4.8251e+06	7.57015e+06	4.03316e+06	8.16213e+06	7.20135e+06	8.32648e+06	7.49287e+06	7.03055e+06	1.1792e+07	1.03599e+07	6.49842e+06	5.92569e+06	5.75953e+06	7.71019e+06	8.08694e+06	5.59815e+06	3.98026e+06	6.18694e+06	7.62729e+06	6.41552e+06	1.51888e+07	6.39892e+06	1.21369e+07	6.79771e+06	6.7233e+06	6.58567e+06	6.79823e+06	6.85065e+06	6.79758e+06	6.75884e+06
M185T107_4	185.078	107.4	1.8	415517	366734	407479	345301	409939	362223	441051	307829	266937	271142	270980	304200	209211	285949	331328	282002	306656	216097	303326	301053	282922	275649	305601	272181	268728	298855	298860	310859	328642	298808	298866
M185T126	185.057	125.5	2.1	206847	250783	227564	301725	71293.7	260049	249588	79416.2	93685.6	264618	300293	253651	285000	86873.4	427875	283055	241546	323889	287864	99263.6	70461.9	98319.7	98541	299744	220216	241474	245687	164310	250400	240504	107275
M185T373	185.101	373.1	6.2	1.06079e+06	272346	308000	815674	958014	1.39176e+06	93919.1	129507	575230	523627	152092	826340	993714	285965	758715	835553	672957	476182	22390.2	326236	1.0177e+06	719018	1.05555e+06	455042	232615	584072	538771	503665	537527	474407	538014
M185T541	185.119	541.4	9	736252	739202	762394	954519	1.56378e+06	1.37152e+06	1.39257e+06	685197	2.21991e+06	3.51795e+06	2.33134e+06	2.42531e+06	1.79186e+06	3.00713e+06	1.11866e+06	2.21649e+06	2.48338e+06	2.10618e+06	2.56362e+06	3.58064e+06	2.88728e+06	1.82454e+06	2.75491e+06	3.06172e+06	1.26789e+06	2.01956e+06	2.40792e+06	1.875e+06	1.88989e+06	1.52842e+06	2.0769e+06
M185T562	185.001	562	9.4	97384.2	109237	64212	93804.4	76423.7	67754.4	116559	81491.2	72210.6	112730	100351	53429.7	112391	105911	120971	105533	95108.5	108439	81561.4	92488.3	96621.1	62763.7	83790.6	88083.8	107606	91080.1	59010.1	88824.2	61055.7	104225	84322.6
M185T597	184.984	597	9.9	713894	3.84908e+06	509202	3.65209e+06	241968	997252	388389	490318	216444	328700	984744	397489	720282	461663	413489	764617	434582	819310	1.64408e+06	298648	832541	212320	1.81911e+06	1.18053e+06	884750	884723	622524	970085	826094	882678	821296
M185T615	185.118	614.5	10.2	800640	1.61778e+06	1.78528e+06	1.41842e+06	1.2363e+06	576398	1.60771e+06	2.24408e+06	1.47402e+06	1.92154e+06	1.91409e+06	1.97044e+06	1.48194e+06	1.72585e+06	1.47655e+06	1.52817e+06	1.71645e+06	1.03599e+06	2.92717e+06	2.07958e+06	2.63245e+06	655749	1.83573e+06	2.27664e+06	1.68201e+06	1.53461e+06	1.05959e+06	1.1555e+06	1.87489e+06	1.51894e+06	1.58994e+06
M185T70_1	185.026	69.9	1.2	202986	291318	863126	740331	412459	776608	1.02254e+06	720707	494503	249548	1.67205e+06	266617	408531	889846	475001	582132	1.59012e+06	556467	469844	619029	1.19873e+06	1.6753e+06	963157	629249	384102	398883	383795	382500	331986	332155	326929
M185T70_2	185.046	69.6	1.2	677379	2.6462e+06	214661	2.31363e+06	579562	177068	632083	517820	1.15504e+06	86483.9	1.11003e+06	86623.7	820048	61644.7	546974	97640.9	135001	1.47653e+06	955580	387628	475460	87562.4	1.38936e+06	181276	890467	777468	776756	775973	793401	778090	957381
M185T72	184.985	72.5	1.2	6.10701e+07	5.12132e+07	6.65297e+07	6.17046e+07	6.58787e+07	6.42199e+07	7.90621e+07	6.70866e+07	6.76386e+07	8.97805e+07	8.28345e+07	7.78036e+07	7.41675e+07	8.53981e+07	8.29453e+07	1.02792e+08	7.74256e+07	7.41813e+07	7.12758e+07	7.38421e+07	7.98923e+07	7.42804e+07	7.30442e+07	8.40516e+07	7.32425e+07	7.54027e+07	7.25805e+07	7.32349e+07	7.01839e+07	7.32387e+07	7.25633e+07
M185T769	184.988	768.6	12.8	149828	703783	174605	792942	390966	149475	220227	507904	591248	408571	237382	534906	570859	398522	549081	635081	431933	492296	1.01607e+06	335419	617991	503578	513123	483661	430058	280519	555569	314244	428090	427433	430417
M185T784	184.984	784.1	13.1	932010	699588	539561	559683	692224	271640	860910	1.02971e+06	1.1232e+06	560028	1.29835e+06	545081	858462	1.36225e+06	563941	603124	1.06526e+06	1.15526e+06	687677	427229	1.0078e+06	603363	464069	554060	585269	858143	807628	857610	755795	919986	853732
M185T82	185.046	81.5	1.4	4.70999e+06	4.52232e+06	723590	4.40426e+06	821801	424648	869746	751526	4.85768e+06	4.96476e+06	5.65344e+06	4.29596e+06	747899	5.32093e+06	2.76256e+06	3.75712e+06	4.32527e+06	2.22213e+06	5.37658e+06	655547	2.4965e+06	3.47443e+06	4.66596e+06	6.7889e+06	2.98348e+06	3.17638e+06	3.04753e+06	3.17942e+06	1.4619e+06	3.1757e+06	2.99703e+06
M185T88	185.022	87.6	1.5	5.64929e+06	6.22357e+06	1.27193e+07	5.14796e+06	4.98275e+06	5.29286e+06	7.96208e+06	1.00998e+07	4.18536e+06	3.39996e+06	6.36546e+06	3.69662e+06	631055	1.17232e+06	3.60963e+06	4.27025e+06	2.77087e+06	3.50281e+06	3.92016e+06	1.24646e+07	3.45586e+06	4.34626e+06	754548	3.26417e+06	4.07097e+06	1.50145e+06	3.89051e+06	4.20798e+06	4.18608e+06	4.73326e+06	4.08272e+06
M185T91	185.046	90.8	1.5	2.59796e+06	3.29091e+06	3.79375e+06	2.90897e+06	2.57931e+06	1.53758e+06	2.118e+06	2.12655e+06	2.65608e+06	3.53312e+06	2.53659e+06	2.89483e+06	2.72765e+06	3.41817e+06	2.69247e+06	4.47763e+06	2.92161e+06	2.25361e+06	3.92409e+06	2.07202e+06	1.57336e+06	4.45891e+06	3.12412e+06	4.69855e+06	3.62742e+06	3.13541e+06	2.90557e+06	3.2436e+06	3.67751e+06	2.89706e+06	2.68851e+06
M185T95	185.093	95.4	1.6	960290	1.03653e+06	594142	1.1064e+06	1.16331e+06	908247	973669	974165	1.04143e+06	1.49123e+06	1.51848e+06	1.22506e+06	886509	1.18174e+06	1.23505e+06	1.10473e+06	1.04096e+06	1.18209e+06	1.64104e+06	1.91543e+06	1.57986e+06	1.31539e+06	1.41808e+06	1.45232e+06	1.15695e+06	1.15678e+06	1.145e+06	1.13516e+06	1.18379e+06	1.13654e+06	1.15677e+06
M185T97	185.022	96.8	1.6	605920	937096	597545	1.095e+06	833670	1.1589e+06	836344	1.10043e+06	1.17106e+06	538031	944743	615623	352019	1.58017e+06	626707	1.24844e+06	1.71828e+06	1.05339e+06	2.57363e+06	2.65027e+06	1.26579e+06	174005	978669	245718	874931	922721	348342	1.02486e+06	668309	958603	856532
M185T99	185.003	98.7	1.6	1.46721e+06	1.37135e+06	1.41199e+06	1.39098e+06	1.34946e+06	1.3887e+06	1.34103e+06	1.22584e+06	1.3719e+06	977439	1.17733e+06	1.0777e+06	1.32815e+06	1.17299e+06	1.08472e+06	1.25419e+06	1.33361e+06	1.4227e+06	1.22826e+06	1.29704e+06	1.37882e+06	1.43898e+06	1.42689e+06	1.44494e+06	1.52857e+06	1.49459e+06	1.46846e+06	1.49575e+06	1.4515e+06	1.44853e+06	1.49615e+06
M186T105	185.845	105	1.8	90579.3	84814.6	157457	139201	104778	94312.7	118467	92051.6	151709	175444	193756	240453	174465	202450	156897	193856	155015	136594	135351	135139	176411	131269	178160	174372	170115	164363	132443	184990	169531	167573	169750
M186T110	186.041	109.7	1.8	229139	259150	1.52713e+06	1.13739e+06	850319	468637	548409	1.03957e+06	2.04695e+06	1.09542e+06	261263	118217	1.09802e+06	148447	223819	832893	235087	1.54632e+06	259208	287404	1.12087e+06	154442	834117	238957	938950	875620	935316	939876	374630	739027	943174
M186T118	186.077	117.9	2	974335	511954	1.07688e+06	1.05235e+06	1.05835e+06	1.06166e+06	1.07597e+06	1.04679e+06	691370	791551	724898	923626	703645	947581	935624	841721	1.09494e+06	971906	1.24592e+06	1.12808e+06	990673	1.1232e+06	1.24165e+06	1.57125e+06	815345	736465	818835	812231	789652	763655	814856
M186T119	186.041	119	2	900672	690500	840150	907693	943084	792495	933505	731753	765635	774552	707856	699829	703514	753889	824288	720672	717893	662396	756172	782552	766210	848330	828090	731237	712704	730084	774852	730292	711528	706765	731589
M186T128	185.947	127.9	2.1	37105.6	66608.1	63918.2	52994	44997.8	47168.8	17451.9	49627.2	52880.1	48510.5	62691.6	76587.9	63933.7	65855.1	48381.2	49717.4	10440.7	38389.5	40100	42905.2	28683.8	47569.8	14938.6	9034.44	49006	47256.1	17994.4	49249.9	45915.4	49487.5	46589.3
M186T279	186.113	279.1	4.7	932752	1.59733e+06	840893	976692	996576	209601	992477	895398	834941	973403	919617	1.56147e+06	780489	760093	1.33215e+06	550472	879287	1.1342e+06	1.62422e+06	1.64208e+06	1.04607e+06	830366	659197	1.01105e+06	881236	485464	486446	874439	809845	874017	807138
M186T286	185.947	286.2	4.8	165427	110332	227102	219820	154209	214309	189757	207705	240710	159805	208733	185705	49138.1	241381	198790	163905	90535.3	134549	191452	261631	130416	180509	210745	129883	148732	184745	178896	184740	181787	199796	177121
M186T303	185.947	302.8	5	254665	219959	275606	301026	518652	367298	151978	229104	95677.1	78903	307139	143725	211102	386863	422159	265459	170207	135185	189906	173990	192518	228902	132448	258391	198720	154232	115370	196839	197355	178611	150696
M186T32	185.963	31.8	0.5	57192.3	53766.2	68705.4	14843.1	82569	111856	36072.2	40927.8	36241.4	34995.3	73492.1	33064	72320.1	111232	26844.4	90002	29491.8	74509.9	89479.8	48219.9	67963.9	23715.5	52425.5	31648.5	52063.4	62928.2	61779.8	52350.3	54029.6	61784.2	56873
M186T348	186.023	348.3	5.8	33323.3	25573.3	26290.2	23921.2	27140.5	30450.6	29443.1	33333	26707.8	23565.5	19129.5	23033	28723.3	20667.2	22422.2	25353	26481.8	24880.6	26724.4	23020.8	49326.4	27032.9	23444.1	25070.3	24018.9	24956.4	16214.4	28790	27296	25718.1	23969.2
M186T361	186.114	360.9	6	2.46108e+07	2.36131e+07	9.37345e+06	2.85385e+07	2.839e+06	2.24447e+06	9.48202e+06	9.61857e+06	3.45439e+06	1.74343e+06	1.12563e+06	1.85264e+06	1.00255e+06	4.2838e+06	2.14285e+06	5.04178e+06	1.20067e+07	3.59932e+06	2.67175e+07	1.12628e+07	1.09826e+07	8.18361e+06	1.34791e+07	1.53505e+06	1.04211e+07	8.73741e+06	9.4926e+06	7.45869e+06	5.75566e+06	6.1957e+06	7.38293e+06
M186T363	186.056	363.2	6.1	265811	367747	308061	337508	186648	154553	591410	278414	143351	153075	262512	149823	96334.8	218267	116360	143251	151436	204745	185628	155177	172877	184218	93171.4	369626	112350	129392	155921	156119	155857	155992	155916
M186T374_1	185.947	373.8	6.2	502627	478373	264953	471725	199327	218293	399997	424986	5487.94	12634.7	21242.2	13812.5	2189.21	23507.8	5550.11	9286.68	373254	4424.4	259734	191187	359251	7262.76	52631.9	9185.07	194639	151083	141400	162672	162996	151916	58801.2
M186T374_2	186.113	374.4	6.2	1.23362e+06	1.1227e+06	786270	1.42308e+06	709773	399216	463973	1.13185e+06	443579	912754	841778	462591	1.17652e+06	858354	960344	814248	1.95829e+06	1.52124e+06	1.95473e+06	1.06645e+06	1.23477e+06	955122	1.12657e+06	1.64862e+06	980859	978852	1.0528e+06	980380	1.02246e+06	761147	1.02271e+06
M186T463	186.114	463.1	7.7	420911	565352	430014	533665	500133	433164	430343	531876	465171	413917	475075	525645	403251	453820	407446	428621	435922	342179	415498	532394	429178	381532	323228	361424	430689	423540	397029	430670	413993	438686	430871
M186T547	186.121	547.3	9.1	71239.3	351925	147559	167678	242375	108544	140766	57958.4	115981	393857	338141	221144	249637	179291	152489	119689	62829.4	290189	430844	362879	400211	399851	407050	386523	202508	224557	170138	202035	176290	208921	174284
M186T615	186.121	614.6	10.2	120545	122440	224474	174541	156261	135520	182715	163968	173876	227788	248261	197881	112842	151976	172288	216785	207009	237135	190505	224222	281794	254537	66235.8	303173	108583	158110	135370	141726	142685	134974	142705
M186T715	186.113	714.7	11.9	242482	387326	388193	213346	605606	189441	400063	260597	259923	641617	595584	491384	327765	863705	696247	629728	707113	561714	757476	629557	829215	816632	559843	702701	539547	261334	504335	538285	542332	539269	511907
M186T72	185.989	72.4	1.2	1.61201e+06	515903	1.75215e+06	1.65747e+06	1.83386e+06	2.13962e+06	1.123e+06	3.49253e+06	5.90742e+06	5.55202e+06	1.81038e+06	1.72024e+06	1.23546e+06	2.20474e+06	529764	1.62835e+06	2.14573e+06	531382	1.79007e+06	1.64257e+06	2.11859e+06	1.32171e+06	537513	493662	1.64967e+06	3.2929e+06	1.63222e+06	1.61103e+06	2.02859e+06	1.9437e+06	2.09192e+06
M187T102	186.983	101.5	1.7	203640	337495	159403	321457	203165	303951	145174	21807.5	358913	160826	174247	246326	160100	112260	170483	164648	156520	25490.1	198362	189231	20288.3	243687	325556	141053	218436	218594	211292	210456	146642	219119	218780
M187T113	187.025	113.4	1.9	566392	493411	311100	488343	1.08895e+06	372321	357579	406745	357863	282549	408635	1.03844e+06	1.22718e+06	722802	924214	730284	689037	1.25752e+06	1.12609e+06	1.0573e+06	824519	966584	590384	593911	623261	489978	1.01491e+06	589296	663196	625405	756085
M187T118	187.109	117.6	2	190823	792373	157395	163542	165326	150515	1.27658e+06	831917	1.85517e+06	3.96363e+06	1.84496e+06	1.40094e+06	2.71771e+06	2.9077e+06	3.42948e+06	3.05435e+06	1.3835e+06	2.5743e+06	2.0343e+06	2.32932e+06	1.40353e+06	184691	808030	614914	1.39054e+06	1.39058e+06	1.39071e+06	1.48729e+06	1.40353e+06	1.41662e+06	1.33828e+06
M187T128	186.934	128	2.1	284901	76726.2	132126	133873	154667	69646.5	190455	49922.9	102093	25791.3	163483	123810	158012	55532.2	126992	78911.9	8224.18	140291	108489	109153	45970.9	67670.2	145767	137582	132958	108310	134669	145295	144869	134711	145485
M187T148	187.061	147.8	2.5	217028	201909	284621	448244	393729	383255	191894	232186	330966	394195	290367	451696	1.26327e+06	361021	457033	446142	422950	234439	567512	368588	439943	325549	426211	391923	356170	359075	358066	336581	359459	135214	327909
M187T194	187.109	194.4	3.2	1.45581e+06	1.50157e+06	233899	495111	242527	150668	246300	286283	388385	279889	349861	309668	297862	477963	228191	296679	675135	277796	395058	453212	310048	312868	416329	1.17529e+06	286891	260381	319010	339732	371220	368100	340147
M187T256	187.097	256.3	4.3	2.21819e+07	2.05255e+07	2.32281e+07	2.34154e+07	1.95114e+07	1.12541e+07	2.05483e+07	2.09309e+07	1.58686e+07	3.28769e+07	2.0818e+07	1.04027e+07	1.85155e+07	1.39789e+07	1.66963e+07	1.522e+07	1.38536e+07	9.94679e+06	1.49151e+07	2.84767e+07	8.25213e+06	7.58871e+06	1.91367e+07	1.84026e+07	1.53091e+07	8.63948e+06	1.48831e+07	1.52673e+07	1.45379e+07	1.52843e+07	1.4538e+07
M187T303_1	186.934	302.8	5	136988	137236	126124	129275	132568	145193	122032	113310	119730	122740	97753.8	126388	129666	109389	139268	105845	139035	125553	129870	134175	126328	109870	122497	137422	138254	132568	139126	139859	135251	133071	134436
M187T303_2	187.061	303.1	5.1	65817	96818	198389	70279.8	168389	242114	65840.8	59867.9	437871	1.08609e+06	457414	579780	97960.4	442709	511309	1.42275e+06	340460	370513	121052	762601	426097	1.34277e+06	479922	426238	503771	398301	411027	563458	400371	398422	404304
M187T35	186.866	34.8	0.6	66515.6	62196.2	62084.9	73842.3	49364.7	43072.7	71321	68123.7	62576.8	77049.2	72631	56100.4	70621.9	74009.8	78075.5	82162.7	87529.2	85606.3	89327.3	85006.7	81784.5	65170.3	63334.7	88122.7	75876.9	72339.7	72328.1	78996.4	72322.6	73311.6	71591.7
M187T361	187.117	360.7	6	563995	763089	450676	1.31269e+06	552359	399837	754505	1.08576e+06	596709	679749	599019	257543	382441	640284	384157	746846	847095	1.24782e+06	755690	844675	740127	1.2016e+06	1.75316e+06	435338	661741	467167	869085	737562	688406	733953	735280
M187T406	187.007	406	6.8	6556.82	681.235	3500.86	23038.2	35842.2	2720.61	42601.1	8292.93	5983.31	46209.1	8770.27	5383.91	2321.73	48779.2	66771.5	13563.3	79620.4	32947.5	98361.3	81617.4	79161.9	47689.7	8364.35	36915.4	40510	40138.8	40615.7	17125	40398.5	38790.5	38955.7
M187T472	187.007	471.6	7.9	2.92912e+06	4.63544e+07	3.14182e+06	5.64273e+06	301702	246022	1.47709e+06	516610	329108	1.59123e+07	428989	2.85289e+06	3.79102e+06	1.12121e+06	2.14447e+06	2.01007e+06	275047	713226	3.69049e+07	2.92887e+07	204070	178966	138868	7.47392e+06	4.62902e+06	6.38123e+06	6.07231e+06	6.56266e+06	6.05007e+06	6.02201e+06	6.70704e+06
M187T516	187.134	515.8	8.6	274188	394124	101695	829804	286884	260226	340358	603306	734710	974282	588911	623174	1.03137e+06	807379	1.02682e+06	956439	1.03697e+06	901101	1.14013e+06	1.15724e+06	953378	782892	814070	948807	1.00426e+06	785681	835203	825269	999808	787859	788374
M187T70	187.025	70	1.2	2.69731e+06	1.54793e+06	2.81386e+06	2.14818e+06	2.5307e+06	810260	1.24524e+06	1.39246e+06	2.02983e+06	2.271e+06	2.21685e+06	2.09286e+06	2.16479e+06	2.17025e+06	2.00514e+06	1.99301e+06	2.21283e+06	1.99399e+06	946263	1.51969e+06	2.28457e+06	2.32493e+06	1.20063e+06	2.07824e+06	1.88738e+06	1.72564e+06	2.90726e+06	1.76528e+06	1.90248e+06	2.12256e+06	2.04157e+06
M187T84_1	186.918	83.6	1.4	1.32208e+06	1.21171e+06	547986	1.36009e+06	1.15296e+06	1.20021e+06	1.3235e+06	425916	1.03616e+06	797772	658024	657010	906258	769478	1.42836e+06	929550	1.02705e+06	693051	1.19363e+06	1.02354e+06	988171	962346	1.35944e+06	770485	1.13724e+06	1.52129e+06	1.13151e+06	1.23573e+06	1.22831e+06	1.04237e+06	1.12407e+06
M187T84_2	187.022	83.8	1.4	111290	464351	263074	94271.6	101718	98654.4	403815	466534	91868.8	440164	319331	385431	284145	246028	91481.2	380095	83880.8	172817	341547	113331	381365	353609	330176	423460	147879	249403	137480	148169	188621	147468	187893
M187T92	187.001	91.5	1.5	837119	944161	571745	941254	961716	736574	781987	768777	86388.5	281558	70198.8	85882.2	238533	416148	311874	277080	1.45587e+06	412098	1.50693e+06	821127	1.22042e+06	326986	339535	349558	620858	624658	644354	624560	650432	624547	632207
M187T94	187.072	93.9	1.6	1.94454e+06	2.26996e+06	2.43386e+06	2.45385e+06	1.95973e+06	967829	2.26193e+06	2.31359e+06	2.60904e+06	4.13881e+06	2.59787e+06	3.47823e+06	3.15255e+06	3.96651e+06	3.3e+06	3.92486e+06	2.5748e+06	2.39191e+06	3.48195e+06	2.41225e+06	3.04826e+06	2.33872e+06	2.53918e+06	3.88444e+06	2.332e+06	2.58131e+06	2.36835e+06	2.3351e+06	2.47984e+06	2.28327e+06	2.37937e+06
M187T96	187.12	96.3	1.6	599301	701201	841731	491466	731984	693075	692419	632451	719448	622383	697347	806205	794506	751457	904116	700012	588963	738423	740581	744835	525317	592770	671895	543811	655026	764591	711048	764505	709181	908837	708308
M187T97	187.024	97.3	1.6	204004	276930	234868	230876	200862	215964	233674	249491	262803	70989.5	229106	284484	257005	222265	190465	198526	222663	254247	292450	202922	152903	239918	274527	197169	269422	275692	262485	270669	269587	275370	292662
M188T116	188.039	116.4	1.9	142789	74880.4	137063	66779.6	155859	109303	105301	79245.8	140023	137504	132308	184488	139873	118326	157305	132556	143691	149060	152556	150684	127216	142070	132270	152628	137280	127679	116128	132983	136830	137195	136998
M188T118	188.112	117.6	2	86122.2	83943.2	86912.6	108432	78911.3	65783.8	85052	68025.3	131003	108257	129540	109734	68408.9	120149	111010	103108	91370.2	69153	101351	126446	112435	122981	120548	122126	86333.9	92749.6	95352.9	89683.8	70364	96337.1	89678
M188T126	187.941	126.3	2.1	4.23731e+06	6.30407e+06	4.00687e+06	5.45426e+06	2.99092e+06	4.23181e+06	2.1422e+06	4.09196e+06	3.77954e+06	2.95114e+06	3.47344e+06	4.27272e+06	4.00847e+06	4.68638e+06	1.71464e+06	3.18022e+06	4.25091e+06	3.34195e+06	6.96946e+06	2.78453e+06	3.54357e+06	2.70829e+06	5.15941e+06	3.87991e+06	3.60581e+06	3.41095e+06	3.41639e+06	3.30854e+06	3.41708e+06	2.87595e+06	2.8559e+06
M188T157	187.942	156.6	2.6	756816	624881	932579	887998	1.37103e+06	156625	822305	932805	1.93778e+06	1.70622e+06	2.41894e+06	1.40224e+06	1.80707e+06	1.93032e+06	1.70957e+06	1.80783e+06	2.93747e+06	2.99969e+06	2.80715e+06	1.93789e+06	2.69513e+06	2.38614e+06	2.43765e+06	2.04493e+06	1.69253e+06	1.65245e+06	1.69228e+06	1.47624e+06	1.69275e+06	1.6933e+06	1.38181e+06
M188T257	188.098	257.5	4.3	1.3429e+06	1.75667e+06	1.2687e+06	1.28995e+06	1.34055e+06	1.22468e+06	2.05408e+06	943690	1.29582e+06	1.23648e+06	1.98458e+06	962766	473796	945961	1.23401e+06	1.05468e+06	596204	1.22548e+06	712116	1.80099e+06	783234	1.04688e+06	2.30789e+06	742612	1.21714e+06	955925	1.21739e+06	1.15253e+06	989085	1.21504e+06	1.39244e+06
M188T297	188.002	296.8	4.9	155963	141011	109936	205395	115511	216876	120970	212198	185591	210900	184490	137577	243824	147216	132015	145459	126234	123743	216530	119558	180751	189202	263418	152107	212954	222894	188264	202004	191027	144286	186234
M188T301	188.093	300.6	5	3.0976e+06	4.12971e+06	3.36031e+06	4.69767e+06	3.40103e+06	3.65333e+06	3.67564e+06	5.5683e+06	3.01227e+06	2.23832e+06	2.17783e+06	2.35507e+06	3.48547e+06	2.54729e+06	2.17119e+06	3.80926e+06	2.75991e+06	5.31415e+06	5.20154e+06	2.5552e+06	3.90579e+06	3.51611e+06	5.01683e+06	3.44092e+06	3.22873e+06	3.52436e+06	3.40553e+06	4.0635e+06	2.49484e+06	3.52194e+06	3.52504e+06
M188T303	187.942	303.1	5.1	1.63188e+06	1.7232e+06	1.23459e+06	6.60536e+06	1.56942e+06	3.70455e+06	3.83065e+06	4.02361e+06	6.88232e+06	6.21159e+06	5.57603e+06	5.85819e+06	2.0694e+06	5.07861e+06	3.50299e+06	3.60293e+06	7.23216e+06	7.68984e+06	2.80307e+06	6.18412e+06	3.91263e+06	4.34198e+06	8.64392e+06	1.08915e+07	4.15163e+06	5.23905e+06	4.35464e+06	4.37625e+06	4.01192e+06	3.81452e+06	4.36658e+06
M188T31	187.905	31.5	0.5	714701	800969	856014	819873	435914	594494	1.18264e+06	726687	795790	883086	180309	637558	140404	558072	793743	993807	186881	980691	724636	971865	758681	768936	495120	135924	495040	493492	491924	433776	412964	334604	527648
M188T346	188.02	345.5	5.8	75225.3	38103.9	76919.6	28023.1	36011.7	11572.3	72860.5	22545.4	72757.1	41501.3	35681.3	24328.4	66722.2	65880.7	70666.6	69826.4	73641.4	72101.4	35311.2	69657	70294.1	42379.7	40044.4	37221.6	44694.9	58944.6	58867.8	58799.5	54767.8	54754	54682
M188T352	188.035	351.8	5.9	1.15632e+06	994533	1.46992e+06	1.38551e+06	937202	1.07914e+06	1.14389e+06	1.43714e+06	1.16653e+06	203857	975982	98859.5	170554	1.02189e+06	1.57122e+06	179918	32800.4	96712.6	407816	4.10237e+06	78146.9	944450	120306	97985.1	1.12148e+06	1.1125e+06	1.03296e+06	1.00656e+06	320735	1.12522e+06	1.03252e+06
M188T368	187.861	368.4	6.1	263794	447518	280090	503935	276871	267875	121905	331338	314686	361337	208267	281402	350220	254230	324520	257559	176159	332373	352066	276280	263847	211784	270619	488206	314459	327895	314450	347038	302605	361075	314444
M188T37	187.861	37	0.6	318272	308941	331641	318386	313612	249670	382187	367065	289220	359952	346208	322828	307860	397017	355234	320131	375608	287232	342198	382072	377302	294504	273148	383683	262914	265379	305724	314691	313824	294106	311490
M188T384	187.86	384	6.4	92589	982163	865127	141211	66593.7	57385.2	603976	796432	106769	579627	592997	879674	751972	807411	1.0055e+06	1.11559e+06	895333	125168	85717.8	545732	52021.4	191573	752968	571663	824083	756447	836911	848131	861743	1.01869e+06	861999
M188T393	188.039	393.5	6.6	4.79309e+06	5.16146e+06	5.90145e+06	4.39094e+06	6.81866e+06	6.40986e+06	8.92667e+06	6.93488e+06	7.819e+06	6.94147e+06	6.82307e+06	5.52487e+06	5.45673e+06	5.00022e+06	6.99693e+06	5.42169e+06	3.33448e+06	5.38952e+06	4.07008e+06	5.60552e+06	5.97285e+06	6.46073e+06	7.30369e+06	3.33005e+06	5.67582e+06	5.90509e+06	5.74203e+06	5.90672e+06	6.71035e+06	6.37774e+06	5.68556e+06
M188T417	188.039	417.4	7	1.58486e+06	1.32989e+06	1.03328e+06	1.67007e+06	1.58421e+06	1.2964e+06	1.51219e+06	1.4534e+06	941659	1.112e+06	360614	834503	670946	1.43277e+06	851879	355772	2.1638e+06	903479	2.46365e+06	1.71711e+06	2.08771e+06	1.10623e+06	1.32208e+06	1.08698e+06	1.23383e+06	679573	1.22912e+06	1.40131e+06	1.29948e+06	1.25055e+06	1.12516e+06
M188T472	188.01	471.6	7.9	1.08983e+06	2.69806e+06	65869.3	275670	38661.5	30026.6	304265	72499.6	10944.7	890090	21689.7	193746	491783	129535	120397	406764	46882.5	20822.2	1.73023e+06	1.67826e+06	12495.3	17349.7	20884.5	280348	328945	458343	458523	441380	440327	459109	481108
M188T539	188.072	538.9	9	137978	81637.2	41438.1	375801	171876	120920	8100.86	85063.3	154603	162220	10212.6	48578.5	11320.4	7948.27	3555.57	3844.45	4248.69	8848.46	230320	5065.74	55913.6	261146	5029.95	12590.1	117638	112928	122431	117622	117665	112276	99847.1
M188T546	188.137	545.7	9.1	414445	183062	324193	449535	287520	105540	209113	331363	223634	144296	233663	161605	264201	201430	125888	247204	269137	216386	274490	202521	282573	352752	264520	154702	242788	166720	234654	232486	241578	251271	242450
M188T55	187.861	55	0.9	131868	154505	150709	180988	108297	135435	155244	196841	181010	162175	187696	158756	149193	232872	163519	221958	183208	190977	261099	192832	244354	174384	171765	165115	158874	173081	158464	163205	163663	163210	158367
M188T560	188.112	560.2	9.3	390923	418055	609671	438175	568963	532311	459562	199511	417391	342345	295088	285240	466561	235990	314018	318842	324808	252381	500899	708785	130475	451428	341719	89606.5	322376	360503	414073	339366	292651	361908	341488
M188T601	188.137	601.1	10	4.91711e+06	3.57113e+06	8.39033e+06	3.36515e+06	1.3393e+07	8.31774e+06	5.08287e+06	8.80504e+06	9.7665e+06	1.19092e+07	3.30312e+06	1.63756e+07	4.54045e+06	6.09376e+06	7.36529e+06	9.09568e+06	7.9544e+06	2.73219e+06	2.30908e+06	3.5472e+06	8.1777e+06	1.03458e+07	7.68182e+06	4.0866e+06	6.26969e+06	6.89747e+06	6.69787e+06	1.06881e+07	7.43258e+06	7.37156e+06	7.35644e+06
M188T658	187.861	657.8	11	2.20929e+07	3.68178e+07	1.48779e+07	4.98439e+07	1.78798e+07	1.06766e+07	8.21204e+06	8.32472e+06	8.7638e+06	4.66553e+06	7.73677e+06	4.13435e+06	4.38051e+06	6.23327e+06	2.45111e+06	3.93355e+06	7.59887e+06	1.03557e+07	1.6869e+07	1.16193e+07	6.55475e+06	6.34634e+06	1.28437e+07	1.44811e+07	1.48641e+07	1.41625e+07	1.48723e+07	1.81685e+07	1.38027e+07	6.76477e+06	1.37822e+07
M188T683	187.861	682.8	11.4	1.44227e+07	1.67397e+07	1.52104e+07	1.82599e+07	7.3299e+06	9.51679e+06	1.39041e+07	1.98426e+07	1.17571e+07	1.1862e+07	1.39769e+07	1.02815e+07	4.1439e+06	1.16376e+07	1.34497e+07	1.39731e+07	1.18406e+07	1.10517e+06	1.00028e+07	2.12614e+07	1.41641e+07	6.97465e+06	8.30537e+06	6.91817e+06	1.40366e+07	1.05799e+07	1.05716e+07	1.05965e+07	9.65894e+06	1.0985e+07	1.1115e+07
M188T69	187.941	68.7	1.1	6.05585e+06	2.41878e+06	4.0775e+06	4.1176e+06	3.74641e+06	536444	3.75718e+06	4.26943e+06	9.18569e+06	6.62107e+06	5.72875e+06	3.64989e+06	4.18198e+06	1.04979e+07	5.04483e+06	9.8543e+06	3.17303e+06	3.64758e+06	4.3971e+06	7.03599e+06	4.3674e+06	4.15856e+06	3.44317e+06	7.39608e+06	3.9269e+06	3.93589e+06	3.93611e+06	3.9379e+06	5.45232e+06	3.93079e+06	4.24316e+06
M188T699	187.861	698.5	11.6	6.51329e+06	8.57509e+07	6.37457e+06	8.93461e+06	1.8321e+06	5.93333e+06	2.79443e+06	2.91034e+06	973792	1.81501e+07	1.21091e+06	1.49113e+06	1.52158e+07	7.10726e+06	1.95117e+06	2.486e+06	1.12388e+06	175364	2.55795e+06	8.33456e+06	524887	3.2263e+06	547441	801597	7.99671e+06	9.27728e+06	9.27134e+06	9.27808e+06	9.2724e+06	7.99088e+06	9.28273e+06
M188T732	187.942	732	12.2	3.29562e+06	1.22602e+06	2.82424e+06	1.01109e+06	854303	2.20704e+06	1.82841e+06	2.92415e+06	1.97444e+06	2.34242e+06	4.21128e+06	3.77346e+06	760884	2.24168e+06	1.40964e+06	2.75087e+06	3.4924e+06	4.50265e+06	3.89435e+06	2.38862e+06	3.71992e+06	3.6737e+06	2.33887e+06	3.0048e+06	2.66063e+06	2.66449e+06	2.64125e+06	2.65731e+06	1.78823e+06	2.35834e+06	2.31809e+06
M188T795	187.942	795.1	13.3	5.60572e+06	1.54092e+06	5.5112e+06	4.29775e+06	5.63838e+06	2.75838e+06	5.87963e+06	3.85596e+06	9.80903e+06	9.68811e+06	1.12275e+07	8.17995e+06	3.94429e+06	6.87429e+06	8.8454e+06	9.70814e+06	6.21961e+06	5.69288e+06	5.80845e+06	1.40455e+07	6.80366e+06	6.33273e+06	3.14659e+06	1.12109e+07	4.01487e+06	4.42698e+06	5.7317e+06	3.61295e+06	5.71886e+06	4.56933e+06	5.19974e+06
M188T96	188.057	96.3	1.6	723966	1.02277e+06	797236	892842	729100	813846	875073	910572	1.66946e+06	2.57287e+06	2.15083e+06	3.29398e+06	1.89846e+06	1.56115e+06	2.56576e+06	3.14986e+06	4.65222e+06	3.58956e+06	4.9904e+06	3.7529e+06	4.21762e+06	3.83086e+06	4.80069e+06	3.43049e+06	2.55181e+06	2.96348e+06	2.5252e+06	2.47498e+06	2.55249e+06	2.55507e+06	2.48978e+06
M189T107	189.04	107.3	1.8	2.11726e+06	1.83329e+06	2.15088e+06	1.81517e+06	2.3957e+06	1.71503e+06	2.62166e+06	1.93737e+06	2.55673e+06	2.78849e+06	2.46676e+06	2.63148e+06	1.47538e+06	2.20405e+06	3.47195e+06	2.48229e+06	2.30992e+06	1.98002e+06	2.05849e+06	3.56893e+06	2.6673e+06	2.54233e+06	2.27806e+06	1.97011e+06	2.12852e+06	2.29654e+06	2.13539e+06	1.89085e+06	2.205e+06	2.12913e+06	2.20672e+06
M189T111	189.096	110.9	1.8	514223	403082	763806	595233	338398	106801	609508	861925	120582	420967	277380	250580	122375	684227	292290	386489	1.43128e+06	132795	460232	976677	403300	326230	189529	568152	499553	502915	407832	502945	502664	457839	502947
M189T113	189.01	113	1.9	321048	549175	576322	430396	485206	246911	464361	254030	171139	375049	297471	212053	162216	1.24099e+06	273151	232583	364234	252450	701203	553512	585958	359899	1.00494e+06	257529	300840	324490	302424	300806	410689	321502	298691
M189T121	189.077	120.5	2	1.30368e+06	2.54929e+06	318071	739242	834827	968485	1.35349e+06	986990	1.01823e+06	799832	1.13631e+06	539361	61836	1.06218e+06	1.11147e+06	999850	768881	226732	960396	789783	1.18541e+06	954298	981667	1.03136e+06	744214	800542	638506	744151	534716	495957	498123
M189T122	189.034	121.9	2	6.88584e+06	6.413e+06	6.66912e+06	4.27101e+06	6.40173e+06	5.6699e+06	8.62247e+06	6.09493e+06	4.64358e+06	7.96447e+06	6.47525e+06	3.4744e+06	7.56005e+06	5.21925e+06	8.81747e+06	4.6443e+06	5.11461e+06	4.30802e+06	4.31733e+06	1.08582e+07	5.91754e+06	6.91325e+06	3.18855e+06	5.79539e+06	6.51497e+06	6.57481e+06	6.51935e+06	6.46226e+06	6.52777e+06	6.36188e+06	6.46416e+06
M189T127	189.057	127.1	2.1	348484	231520	252762	282354	355615	266996	254455	323191	257186	317629	305002	237798	236498	379827	343249	326393	505928	270820	384411	254182	283852	259652	311365	348121	242384	243306	243672	256304	255221	303761	244390
M189T140	188.949	139.6	2.3	438717	180893	410077	182479	525614	567205	591891	471248	579900	689789	881318	763679	813924	576335	586400	664081	561650	450176	206083	760571	159931	672233	698804	175907	571853	572155	382232	636499	550406	594941	620902
M189T257	189.102	257	4.3	72815.1	101032	100691	116924	108300	88438.4	90291.5	139592	106882	70090.5	97975.6	76306.2	50017.9	110952	65569.8	108969	66461	64609.2	96396	93670.6	80780	69584.4	72495.7	61437.3	76162.9	90955	72979.6	77169.6	79611.9	97991.4	77134
M189T284	188.942	284	4.7	1.24319e+06	2.24763e+06	1.69051e+06	1.43574e+06	584511	1.48935e+06	1.38015e+06	1.98324e+06	90682.8	78512.6	102038	306803	45147.3	564027	63546.2	109111	1.11059e+06	68277	1.59498e+06	973463	1.42084e+06	635930	80563.2	88686.2	513916	913931	491630	499627	656807	679386	508514
M189T286	189.077	285.7	4.8	111775	81197.2	79356.2	92217.9	73547.1	544143	60564	187853	246554	217741	303006	184288	188536	108039	194558	191566	53782.4	207605	242111	761989	183804	185874	240013	187773	111781	98719.5	112358	119249	116960	143527	150738
M189T301_1	189.031	301.3	5	83069	131574	146972	243785	91332	191330	295024	263635	143185	206848	174434	164795	202436	189691	141709	455761	132566	181039	156014	188020	180881	345402	412022	243003	212971	213162	196893	215695	181136	204672	212849
M189T301_2	189.096	300.6	5	572248	590026	587336	723441	526837	435660	693195	869073	66783.1	86633.8	87402.8	69203.9	71872.2	79144.8	51648.6	112675	92482.3	131568	83797.2	76610	98121.5	111881	77599.7	77123.8	259239	262728	266000	254568	259275	236330	263088
M189T303_1	188.942	303	5	418849	1.05375e+06	539201	821841	362263	91811.8	378967	494509	76147.2	143748	105731	143300	327201	156221	176307	158489	577030	423862	532487	1.02821e+06	610565	82093.6	95902.3	493472	305026	391886	390754	552540	425163	477124	390772
M189T303_2	189.077	303.3	5.1	742077	380849	543017	337861	582432	265743	363723	97508.9	624415	392694	556401	525539	99226.3	297967	469206	378738	571035	294374	752340	569610	372458	437669	472962	545306	457217	420588	415111	432715	413794	410718	412725
M189T31	188.866	31.5	0.5	82440	68204.8	74373.3	59855.7	73601.1	58156.3	63195.6	62717.9	62552.8	67154.1	87115.2	67806.6	70866.2	57590.4	55272.2	64016.1	69661.3	49914.3	70879.1	71254.7	63923.4	58494.6	49133.7	67635	63902.4	64031	65957.4	64900	60854.5	64936	64925.6
M189T359	188.986	359.4	6	3.78895e+06	664836	668804	3.72993e+06	8.46486e+06	401529	9.71134e+06	6.09595e+06	5.78031e+06	1.12276e+07	5.5715e+06	4.33916e+06	1.25387e+07	1.34367e+07	1.23913e+07	1.26989e+07	4.64826e+06	1.05444e+07	4.4369e+06	5.76855e+06	6.92237e+06	547453	3.90388e+06	3.80654e+06	6.17668e+06	6.83333e+06	6.84173e+06	7.22301e+06	5.94795e+06	6.69847e+06	6.83529e+06
M189T37	188.934	37.2	0.6	382943	387166	530034	250405	613676	331441	371976	361239	499377	502660	721283	627404	453700	367736	454742	320019	503465	361467	401488	656485	593003	462085	322888	433109	499459	474486	572210	502413	476925	410839	477106
M189T374_2	189.077	374.1	6.2	480439	337885	396895	511155	289009	90429.2	118133	306378	437135	497192	445303	414519	634250	471786	118934	548244	431462	588146	393599	389963	437256	402494	282371	483642	428477	425908	428477	437728	473969	429386	438887
M189T393	189.042	393.4	6.6	634110	608590	438191	662986	731777	522418	657493	512364	218415	171782	414842	355977	70141.2	243484	555661	415733	523475	257547	258702	319289	381323	511880	466184	284862	534031	450394	490936	494556	494070	425048	468409
M189T417	189.042	417.4	7	84867.3	108239	161764	130413	113155	108965	96400.4	129074	66266	92117.2	204708	82747.4	69290.8	176876	165407	204113	140761	75402.2	212587	134156	142267	80798.1	124746	161030	112280	167020	112219	112852	124953	112815	112564
M189T429	188.952	428.7	7.1	2949.9	9960.52	24466.9	27686.6	184221	4414.55	7418.63	2053.3	1.41644e+06	4.17644e+06	251030	1.22974e+06	7.59187e+06	4.18569e+06	3.76439e+06	5.11813e+06	7.87984e+06	2.06246e+07	1.13328e+07	9715.37	4.11922e+06	2.09053e+06	1.12681e+07	7.26699e+06	6.0567e+06	3.77841e+06	5.70162e+06	4.64615e+06	4.60459e+06	4.65544e+06	4.6048e+06
M189T472	189.003	471.6	7.9	25694.3	15058.7	144530	180963	58075.9	683012	4701.42	217140	381980	35061	21367.3	156843	26107.1	39911.7	176533	7602.76	11527	223912	29884.8	260029	230678	185156	412770	287786	254772	262985	275983	254474	254180	290747	223570
M189T501	189.113	501.2	8.4	103439	117070	110635	134218	76947	81635.3	135585	134464	376310	257192	350203	375695	535872	116679	65281.7	48060.4	181077	699644	171798	93055.1	196522	442313	58177.6	285143	256636	281114	320574	308249	241386	282657	266678
M189T509	189.059	508.9	8.5	74902.7	87158.9	80419.4	68623.2	74791.2	20051.2	89193	34865.2	16585.3	64455.2	82545.2	61706.6	35114.9	21611.3	55306.4	53497.7	46196.7	34136.4	74240.8	109158	118364	14018.3	79708.7	27684	61141.6	63442.7	59880.4	63444.2	88609.1	63514.9	53371.9
M189T546	188.952	545.8	9.1	3.16076e+06	2.6917e+06	3.01287e+06	3.06174e+06	1.54786e+06	1.62528e+06	2.99761e+06	4.57297e+06	603335	656299	2.28828e+06	1.19697e+06	859473	2.14387e+06	1.86297e+06	1.68618e+06	859587	491364	1.65184e+06	2.11125e+06	812317	278627	493352	732436	2.03302e+06	2.13073e+06	2.03521e+06	2.1272e+06	2.014e+06	2.12996e+06	1.45181e+06
M189T601	189.139	601.3	10	471222	614342	774863	672785	593103	390876	717410	857248	221938	262127	404155	175180	74118.9	313733	369302	245823	229518	216487	246827	1.20463e+06	735787	465505	346558	444055	380802	379914	355274	378980	339946	427755	145062
M189T741	188.951	741	12.3	2.32061e+06	2.00887e+06	1.47883e+06	1.65485e+06	1.70614e+06	501579	1.55593e+06	1.12467e+06	1.61705e+06	223348	1.34463e+06	1.15483e+06	739945	483627	373817	665011	1.38779e+06	669985	1.21633e+06	532642	905263	1.3224e+06	1.07927e+06	2.83779e+06	1.24737e+06	1.20322e+06	1.22415e+06	753310	727821	1.25001e+06	1.24627e+06
M189T79	189.052	79.1	1.3	2.79601e+06	2.95559e+06	2.60028e+06	2.94811e+06	2.40561e+06	2.62335e+06	2.77472e+06	2.4353e+06	2.63947e+06	2.39853e+06	2.46533e+06	2.65126e+06	2.71158e+06	2.51061e+06	2.76096e+06	2.47484e+06	2.40947e+06	2.5188e+06	2.80365e+06	2.8757e+06	2.2656e+06	2.76609e+06	2.69981e+06	2.50127e+06	2.46245e+06	2.71527e+06	2.55529e+06	2.5844e+06	2.55429e+06	2.58473e+06	2.56545e+06
M189T83	189.005	83.5	1.4	152096	126647	158625	117062	148294	109704	146815	116454	275360	284637	325566	315009	301683	332219	401644	385977	195772	530087	205598	250994	194834	275386	248887	223776	230888	230865	230876	229756	235203	218395	228137
M189T88	189.088	88.4	1.5	270658	655947	588845	1.39661e+06	459976	1.26951e+06	530808	620839	859146	880742	754559	222893	1.22616e+06	911948	586659	779321	733438	839862	1.40627e+06	795138	1.80538e+06	1.30443e+06	1.43741e+06	717886	513007	510792	633367	337599	513231	377272	449863
M189T95_1	189.04	94.7	1.6	5.67724e+07	9.8667e+07	9.21777e+07	5.42186e+07	9.71115e+07	9.97202e+07	1.10004e+08	1.00871e+08	1.28834e+08	1.09559e+08	9.85405e+07	1.04546e+08	7.46606e+07	1.01742e+08	1.05274e+08	1.03614e+08	8.47912e+07	7.68062e+07	5.61056e+07	6.62025e+07	6.62783e+07	7.00854e+07	8.83982e+07	7.30404e+07	8.1342e+07	9.31653e+07	8.13939e+07	8.25048e+07	8.42705e+07	8.14702e+07	8.31519e+07
M189T95_2	189.088	95.3	1.6	2.34382e+06	2.31668e+06	2.12273e+06	2.12147e+06	2.28213e+06	1.42084e+06	2.21019e+06	2.16266e+06	2.45831e+06	1.92888e+06	2.19864e+06	1.60343e+06	1.22698e+06	2.22486e+06	2.53137e+06	2.1539e+06	2.13245e+06	2.07036e+06	2.51798e+06	2.48739e+06	1.76091e+06	2.3267e+06	2.62601e+06	2.01063e+06	2.42467e+06	2.29798e+06	2.14415e+06	2.35465e+06	2.67393e+06	2.40503e+06	2.28657e+06
M189T97	189.057	96.6	1.6	1.32003e+06	1.19801e+06	1.3797e+06	1.30618e+06	1.17531e+06	961873	1.60718e+06	1.31825e+06	856132	1.03772e+06	1.05568e+06	720373	582777	856655	800783	684921	1.26685e+06	519102	1.22636e+06	1.11098e+06	1.10357e+06	980751	806361	956729	1.07557e+06	1.07558e+06	1.07556e+06	1.0663e+06	1.11354e+06	1.06201e+06	1.04554e+06
M190T106	190.018	106.1	1.8	2.34247e+06	6.87895e+06	1.01468e+07	6.34391e+06	1.50706e+07	1.39545e+07	6.7953e+06	6.71071e+06	8.45333e+06	4.00771e+06	6.03446e+06	9.43567e+06	8.42426e+06	5.51688e+06	6.64076e+06	7.15794e+06	4.44967e+06	2.74781e+06	6.10668e+06	4.4004e+06	1.16822e+06	7.11716e+06	1.64858e+06	3.43169e+06	5.51022e+06	4.41057e+06	5.50324e+06	6.03952e+06	5.70271e+06	5.60209e+06	5.72338e+06
M190T114	190.072	114.2	1.9	1.75008e+06	2.02369e+06	1.39104e+06	3.11549e+06	1.37879e+06	1.92288e+06	1.53113e+06	3.1249e+06	2.47366e+06	4.3067e+06	3.78095e+06	3.61971e+06	2.08285e+06	6.8047e+06	2.98959e+06	5.53035e+06	3.03147e+06	4.51026e+06	4.10811e+06	3.85131e+06	4.43229e+06	3.47954e+06	4.25587e+06	3.67954e+06	2.73504e+06	3.21625e+06	2.73169e+06	2.82899e+06	2.83353e+06	2.76351e+06	2.73097e+06
M190T122	190.018	121.7	2	7.46743e+06	8.3541e+06	7.84148e+06	7.66258e+06	5.28986e+06	5.74169e+06	6.79348e+06	6.70207e+06	6.67633e+06	8.10119e+06	1.05365e+07	1.01272e+07	6.56289e+06	9.1424e+06	6.07694e+06	1.14219e+07	8.94395e+06	7.23988e+06	7.91668e+06	8.34205e+06	9.42761e+06	8.41822e+06	6.07172e+06	9.6318e+06	5.28556e+06	6.1935e+06	6.77654e+06	6.20669e+06	6.38746e+06	6.39362e+06	6.3478e+06
M190T148	190.018	148	2.5	1.78414e+06	2.44581e+06	1.27492e+06	2.62095e+06	1.36735e+06	984304	1.21862e+06	1.43723e+06	77295.4	46483.9	100154	46622.7	263625	112620	37542.8	24802	2.1952e+06	18266.7	2.17838e+06	2.15724e+06	1.83721e+06	153113	119925	829549	950455	1.13886e+06	914411	951689	921370	920838	1.19884e+06
M190T205	190.055	204.8	3.4	1.02461e+06	1.02879e+07	3.55038e+06	8.73969e+06	4.80398e+06	8.15251e+06	1.35947e+06	5.10674e+06	5.95832e+06	1.00976e+07	5.96032e+06	5.32608e+06	1.42258e+06	1.67837e+06	5.46113e+06	5.40521e+06	7.30592e+06	4.1631e+06	1.61403e+06	1.34023e+06	5.2347e+06	9.50127e+06	1.57499e+06	8.21059e+06	4.32609e+06	4.35386e+06	4.17058e+06	4.76353e+06	6.69893e+06	4.81889e+06	4.81439e+06
M190T254	190.054	254.3	4.2	2.17612e+06	3.32457e+06	2.13092e+06	7.007e+06	1.83646e+06	1.57838e+06	4.33482e+06	5.79579e+06	3.78424e+06	7.04741e+06	4.82197e+06	4.44538e+06	6.98145e+06	5.71059e+06	6.83532e+06	7.13007e+06	5.6523e+06	6.94738e+06	7.5322e+06	7.61565e+06	7.03221e+06	5.6543e+06	5.76367e+06	6.0158e+06	5.69294e+06	5.41483e+06	5.72482e+06	6.47569e+06	7.60946e+06	6.57339e+06	6.82561e+06
M190T300	190.051	300.4	5	457016	488876	177424	461735	519716	586113	588754	596593	485224	601079	647917	609058	311277	571961	313809	173754	430238	482310	340474	569016	597941	591371	617643	367765	365426	361065	299980	240149	361867	295672	318678
M190T360	189.99	359.6	6	504437	425107	347895	520294	365516	357789	343695	487004	463053	402032	377039	447487	414465	463942	360037	461731	328788	272299	448477	584540	506853	303240	337662	399721	374008	376003	395795	443520	375902	389523	374276
M190T365	190.091	364.7	6.1	302897	1.12445e+06	341216	655355	388773	288327	570362	655438	477698	283599	378855	399885	279575	463153	502936	435072	58734.2	453398	443567	600780	638522	616420	520473	649835	440095	440119	479941	449589	445748	440017	438657
M190T38_1	189.858	37.6	0.6	330763	95917.6	92462.7	86413.7	88632.9	72618.7	231202	109546	122684	28781.7	146002	250967	248516	53720.8	235198	332138	96467.9	90318.1	324006	108652	114299	59497.3	86309.9	67216.6	241198	226110	149950	98282	161028	228134	175433
M190T38_2	189.932	37.7	0.6	130304	116731	152425	160055	166243	145696	149308	164056	165134	151015	164402	144498	133418	164008	125468	163608	117677	135324	180404	222702	144587	187656	184025	168387	161354	161916	146766	161520	161874	154880	144982
M190T384	189.859	384	6.4	89638.8	159006	93642.4	170315	165866	160897	180995	225833	130445	226931	130958	190042	132399	98819.3	115639	35382.4	97761.3	94901.2	242443	172173	78925.8	165022	220806	230737	189223	189206	187621	184377	75227.1	192949	179434
M190T396	190.062	396.4	6.6	62086.2	170746	194678	166277	163230	130373	163521	235204	171984	135356	158684	164193	178192	149083	39501.9	135563	163581	160137	179603	19193.2	154253	39284.6	99471.4	165036	206069	171030	152383	132739	160945	167874	181084
M190T429	189.955	428.7	7.1	2.0504e+06	508609	581065	17462.4	857171	952147	758580	298131	1.10219e+06	12697.4	1.36402e+06	100538	20917.5	387703	18808.3	40301.8	382321	65402.3	8406.85	61711.2	318268	532167	51769.6	50762	186410	451114	389693	228671	291251	393416	391224
M190T448	190.087	447.6	7.5	554467	845383	708244	1.04785e+06	569677	380262	575133	462081	43356.5	58815.8	76159.5	62536.8	25908.6	75869.3	35649	56789.4	489836	61613.4	331847	633602	452187	60769.2	66566	35793.3	401259	426908	347762	343468	354705	343752	344356
M190T478	190.036	478.1	8	20301.4	24445.3	20622.8	27470.2	27068.5	17585	12918.5	18468.4	4854.25	3417.27	7780.02	538.695	3173.15	3862.26	818.549	3932.59	14184.6	7032.74	14936.5	22413	17134	925.372	3265.11	10097.5	12532.8	12093.8	14844.1	12058.5	12103.4	10984.4	12521.5
M190T51	189.932	51	0.8	1.96833e+06	638213	1.8471e+06	963975	1.86243e+06	978090	749484	754382	3.54943e+06	2.17778e+06	3.49642e+06	2.07514e+06	2.87673e+06	1.54682e+06	2.17142e+06	1.67427e+06	2.03975e+06	3.84941e+06	1.24713e+06	2.95557e+06	1.2244e+06	1.95816e+06	1.16329e+06	177512	1.66183e+06	1.5363e+06	1.97684e+06	1.66662e+06	2.07535e+06	1.28564e+06	2.0697e+06
M190T658	189.858	658	11	1.19978e+06	841293	1.42435e+06	1.72707e+06	4.20973e+06	1.04406e+06	1.35555e+06	5.28872e+06	8.47371e+06	1.78029e+07	1.65918e+07	1.606e+07	1.45796e+07	1.13006e+07	1.49614e+07	1.34984e+07	7.26309e+06	1.06552e+07	8.99043e+06	2.20826e+06	1.9374e+06	1.02699e+07	7.36586e+06	1.35947e+07	9.49324e+06	7.78612e+06	8.229e+06	8.39146e+06	8.33593e+06	2.82115e+06	6.6651e+06
M190T682	189.858	682.2	11.4	2.06472e+06	3.05315e+06	4.78006e+06	3.52926e+06	1.78777e+06	1.52272e+06	1.8041e+06	2.26997e+06	7.83146e+06	3.99358e+06	9.97462e+06	6.83525e+06	2.99716e+06	6.00614e+06	2.95502e+06	7.69426e+06	4.77355e+06	1.60739e+07	6.91739e+06	4.50642e+06	5.11096e+06	3.636e+06	3.43914e+06	1.33636e+07	6.48161e+06	4.56879e+06	5.13011e+06	4.69809e+06	4.67053e+06	3.75239e+06	7.89162e+06
M190T698	189.858	698.4	11.6	1.25725e+07	6.08935e+07	5.18565e+06	7.23453e+06	1.24917e+06	4.73193e+06	5.97813e+06	2.92113e+06	662716	1.71316e+07	824086	1.01489e+06	8.81723e+06	4.57109e+06	2.79278e+06	1.69404e+06	764862	119366	1.74599e+06	7.70933e+06	357649	2.19567e+06	372951	545666	5.0127e+06	5.00046e+06	5.28976e+06	5.28471e+06	6.05103e+06	5.24848e+06	4.99241e+06
M190T78	190.018	77.9	1.3	795951	842479	959689	807189	929608	1.06667e+06	1.42932e+06	1.40555e+06	2.26886e+06	2.46879e+06	1.22552e+06	1.82467e+06	1.03567e+06	2.77944e+06	2.16492e+06	2.16391e+06	1.51193e+06	838247	1.31731e+06	1.80096e+06	1.63796e+06	1.28501e+06	952641	1.18632e+06	1.20127e+06	1.20128e+06	1.0775e+06	1.21726e+06	1.23952e+06	1.24025e+06	1.28658e+06
M190T82_1	189.988	81.9	1.4	1.85959e+07	9.67384e+06	1.34475e+07	1.14695e+07	9.94097e+06	8.5329e+06	1.15982e+07	9.56182e+06	9.59348e+06	9.82528e+06	1.09212e+07	9.76947e+06	9.30248e+06	9.21272e+06	9.74173e+06	9.31532e+06	1.79817e+07	1.06014e+07	1.99827e+07	1.46425e+07	9.9817e+06	1.09368e+07	9.80948e+06	1.48217e+07	1.00922e+07	9.6523e+06	9.89238e+06	9.79225e+06	7.63027e+06	9.35741e+06	9.37716e+06
M190T82_2	190.072	81.8	1.4	4.74027e+06	4.28195e+06	3.8637e+06	4.89092e+06	3.5955e+06	3.32368e+06	4.08557e+06	4.05113e+06	4.56705e+06	3.08501e+06	4.40928e+06	3.09553e+06	3.05695e+06	4.82111e+06	4.03811e+06	4.03873e+06	4.9434e+06	3.04169e+06	6.02846e+06	4.75334e+06	4.3225e+06	4.6211e+06	5.02466e+06	3.66345e+06	3.91239e+06	4.01813e+06	3.92323e+06	3.92144e+06	3.89655e+06	3.7444e+06	3.496e+06
M191T108	191.02	107.7	1.8	5.84245e+06	4.46016e+06	4.74408e+06	5.38283e+06	4.80102e+06	4.19172e+06	5.78436e+06	5.10673e+06	5.56557e+06	4.43132e+06	4.43251e+06	5.04878e+06	5.96572e+06	4.62059e+06	6.78935e+06	5.13413e+06	5.25003e+06	4.90228e+06	6.38137e+06	6.38989e+06	5.12494e+06	5.3367e+06	5.51203e+06	5.25184e+06	4.07463e+06	4.65476e+06	4.65277e+06	5.42534e+06	3.86371e+06	4.60634e+06	4.4792e+06
M191T115	191.093	114.9	1.9	60057.3	92305.7	6519.53	84204.9	61902.4	122225	68628.9	31620	272000	187442	130127	158844	214301	118544	246769	218332	89409	229444	132644	52311.8	50300	151843	220418	111392	122992	123152	128530	122296	101356	123296	113153
M191T121	191.02	120.7	2	370492	656930	489791	799085	332174	262733	675981	706912	625149	757338	664565	704734	789903	719904	708997	854742	806368	834708	897548	629345	791703	632837	765781	818538	716829	588371	632033	713460	789331	714554	707781
M191T149	190.966	148.6	2.5	123251	156093	159223	152077	163493	141605	165307	161768	162136	127652	155596	161688	149735	158011	154033	239344	147452	148397	111186	152396	147738	178549	184037	149691	144003	149387	149379	150075	153017	156797	159319
M191T204	191.058	203.6	3.4	447951	105543	124589	113100	179230	271204	355268	361515	136845	357873	374763	110954	122850	110432	375958	103596	391454	135261	160419	144315	474616	470873	448789	444332	317896	317312	206008	317469	316836	205717	317522
M191T255	191.058	254.8	4.2	551358	482170	623445	501675	461797	326173	590987	617865	922782	1.25674e+06	1.33152e+06	1.53006e+06	1.56198e+06	1.46943e+06	1.18455e+06	1.50711e+06	1.09988e+06	1.35557e+06	745064	544524	542091	861611	729686	1.10916e+06	887966	888362	754782	912798	912400	937770	889357
M191T303	191.019	303.5	5.1	387007	431535	440665	391255	589945	398963	307292	306646	227297	370919	381144	323447	307176	465883	305901	342574	394995	276805	496408	313226	367897	239583	337463	333427	393227	425848	402322	374867	318318	342067	374239
M191T360	190.982	359.5	6	221519	434606	263194	355650	239594	395475	271562	236858	231014	197506	287256	203724	208470	165940	162936	204504	159748	226298	222097	231680	249660	218711	237203	230617	261887	261846	236184	261950	261912	266459	248108
M191T362	191.02	362.3	6	88956.1	188127	166806	242713	223914	285876	246491	236782	159011	209077	194729	219519	221183	322005	165449	222582	304251	178760	214814	234464	199372	255653	335029	45845.4	157010	157594	119013	149022	115235	129137	161701
M191T374	191.02	374.1	6.2	276919	281816	522688	269598	293719	285809	500603	384312	296796	424162	527568	367299	464772	466218	954385	852972	789062	409471	878402	490796	529417	447121	300096	299152	315729	454916	431307	449674	433387	429523	454931
M191T429	190.948	428.7	7.1	5.75123e+06	3.34819e+06	3.19167e+06	3.67125e+06	4.52003e+06	3.87831e+06	4.71163e+06	4.35443e+06	1.9715e+06	2.46618e+06	1.89529e+06	2.08403e+06	1.40165e+06	2.30515e+06	1.68886e+06	1.38793e+06	3.67167e+06	82822.9	4.69551e+06	4.06449e+06	5.09672e+06	1.58445e+06	287357	2.19436e+06	4.06124e+06	3.0903e+06	3.06588e+06	3.26086e+06	3.26024e+06	3.08108e+06	3.09395e+06
M191T512	191.071	512.3	8.5	154301	165036	246261	242567	211358	358047	223704	178300	71494.9	218131	198260	193126	205481	215855	219957	216053	219749	204473	119229	303949	285918	267331	230370	82286.2	194569	220203	204502	200923	148651	205127	193401
M191T53	190.928	52.5	0.9	1.55877e+07	1.55848e+07	1.66674e+07	1.38848e+07	1.43435e+07	1.16225e+07	1.4944e+07	1.67069e+07	2.41235e+07	1.57873e+07	1.6129e+07	1.22426e+07	1.47739e+07	1.26372e+07	2.96044e+07	1.59823e+07	1.70031e+07	1.25496e+07	2.30253e+07	1.07994e+07	2.84656e+07	1.12597e+07	1.11582e+07	1.39766e+07	1.78058e+07	1.78029e+07	1.79579e+07	1.84466e+07	2.01675e+07	1.87369e+07	2.02156e+07
M191T549	191.075	549.4	9.2	142108	147329	113454	54676.3	184222	48732.2	150035	57434.7	158312	178737	154858	132212	120912	175686	142966	96482.4	191578	118703	51271.1	172399	56214	45838.2	151687	161746	68208.2	150441	105992	146110	155322	149453	141728
M191T70_1	190.928	70	1.2	2.38515e+06	1.67021e+06	2.09922e+06	1.67059e+06	2.06846e+06	1.46228e+06	1.88695e+06	1.69161e+06	2.04247e+06	1.73876e+06	2.50567e+06	2.00992e+06	1.53005e+06	1.55255e+06	1.71156e+06	1.7239e+06	2.31363e+06	1.50251e+06	2.4821e+06	2.19861e+06	1.86808e+06	1.8744e+06	1.70306e+06	2.20204e+06	1.83835e+06	1.88454e+06	1.83815e+06	1.83056e+06	1.78901e+06	1.82369e+06	1.81407e+06
M191T718	190.994	718.1	12	539548	139755	742674	200931	2.85766e+06	500648	343576	495580	694241	316734	718145	354077	1.06484e+06	1.12427e+06	714972	333155	424938	424645	453513	306236	609417	236836	600433	181191	646950	589985	527593	599430	336177	548433	693225
M191T725	191.074	725.2	12.1	194265	136953	131051	87489	147946	152682	196865	184604	121888	75505.4	83983.5	200485	143999	147879	92830.2	92956.6	130833	102710	170960	139046	95074.4	99874.2	113434	105658	123742	135650	135398	158196	135040	147047	158214
M191T766	191.108	765.6	12.8	4.84501e+06	3.80563e+06	3.58455e+06	2.74004e+06	5.52797e+06	2.94341e+06	3.02842e+06	4.23661e+06	3.49297e+06	1.46958e+06	2.0117e+06	3.30647e+06	1.07996e+06	4.05746e+06	2.74774e+06	3.63081e+06	2.44203e+06	2.46678e+06	4.12733e+06	1.09696e+06	1.10869e+06	4.34261e+06	2.88505e+06	2.92366e+06	3.04879e+06	3.23035e+06	3.52914e+06	3.05048e+06	3.03041e+06	3.04252e+06	3.17579e+06
M191T786	191.108	786.3	13.1	3.89879e+06	3.86394e+06	2.5879e+06	1.75996e+06	2.22528e+06	3.99987e+06	3.37745e+06	2.2665e+06	2.68765e+06	9.50774e+06	7.16269e+06	3.88057e+06	4.49411e+06	6.31563e+06	8.81378e+06	7.24695e+06	7.2646e+06	4.20071e+06	2.59661e+06	2.90768e+06	5.24327e+06	7.77206e+06	2.26364e+06	1.44365e+07	3.89429e+06	4.60953e+06	2.92037e+06	5.33335e+06	5.87566e+06	5.0233e+06	4.56847e+06
M191T79	190.952	78.8	1.3	2.15874e+06	1.12856e+06	1.78311e+06	1.49176e+06	3.08936e+06	1.452e+06	3.89773e+06	3.27523e+06	4.23103e+06	4.23165e+06	4.68291e+06	3.61088e+06	3.43427e+06	5.03016e+06	4.44592e+06	4.76678e+06	4.17366e+06	4.29007e+06	4.66144e+06	4.27612e+06	4.11448e+06	3.38232e+06	4.06207e+06	3.77592e+06	3.22821e+06	3.33474e+06	3.25931e+06	3.33264e+06	1.78608e+06	3.33476e+06	3.33903e+06
M191T81_1	191.02	80.9	1.3	2.15317e+07	1.4216e+06	7.14736e+07	1.26726e+07	2.75638e+06	1.91741e+06	1.88531e+07	5.34196e+06	1.86031e+06	1.02495e+08	2.85465e+07	3.44334e+07	1.45337e+06	2.64057e+06	2.89452e+06	4.75126e+06	2.8449e+07	4.42352e+06	2.71914e+07	2.50479e+06	9.85183e+07	2.19675e+07	9.08829e+06	1.92536e+07	9.09772e+06	8.51604e+06	1.07665e+07	9.09247e+06	7.77859e+06	5.40437e+06	4.33372e+06
M191T81_2	191.056	81.3	1.4	7.92155e+06	8.2794e+06	7.97414e+06	8.42027e+06	7.65962e+06	8.18097e+06	8.2182e+06	7.93338e+06	8.98088e+06	8.31009e+06	8.48203e+06	8.02592e+06	7.62416e+06	8.4179e+06	8.62922e+06	8.3429e+06	7.90672e+06	7.63083e+06	9.00818e+06	8.60789e+06	8.36182e+06	7.97116e+06	9.72472e+06	8.00601e+06	8.14034e+06	8.20756e+06	8.63534e+06	8.03493e+06	8.02499e+06	8.23028e+06	7.80578e+06
M191T89	191.02	88.6	1.5	1.57613e+07	1.95823e+07	4.66547e+07	2.21989e+07	5.45341e+07	3.89269e+07	4.84223e+07	1.90611e+07	1.35718e+07	1.35204e+07	7.55033e+07	4.53846e+07	8.21225e+06	4.9172e+07	3.94692e+07	8.32771e+06	6.94333e+07	2.50321e+07	6.76037e+07	8.39521e+07	6.31942e+07	5.7358e+07	1.47553e+07	1.48761e+07	5.14877e+07	1.9795e+07	4.74063e+07	3.06845e+07	5.1955e+07	5.16098e+07	5.14868e+07
M191T95_1	191.045	94.8	1.6	764137	663083	1.02226e+06	592834	907488	1.35189e+06	900045	969269	823595	962133	824948	922513	845722	921499	788974	266358	993399	651117	520983	196480	931956	1.04284e+06	677609	788974	729931	831200	830312	779134	374594	829105	865066
M191T95_2	191.073	95.4	1.6	1.81891e+06	216125	1.55684e+06	1.23373e+06	1.62372e+06	304703	1.89271e+06	453371	1.958e+06	1.82057e+06	1.51494e+06	2.14481e+06	412950	2.40797e+06	2.60596e+06	2.22049e+06	2.48902e+06	1.20212e+06	2.19654e+06	4.02582e+06	1.97319e+06	183489	444475	216638	1.39239e+06	1.64214e+06	1.50393e+06	1.40299e+06	517729	1.47574e+06	1.46188e+06
M192T106	192.014	106.1	1.8	260356	316284	95714.9	147126	288721	239619	43260	134796	201847	250270	114963	189728	254240	219924	185132	67611.1	64199.6	297141	334810	333669	253246	326666	199952	52071.2	124598	232586	309751	234565	216687	183613	232517
M192T122	192.034	121.6	2	1.57324e+06	2.74198e+07	2.29093e+07	1.01925e+07	606806	1.31496e+06	1.63197e+06	1.94008e+07	2.31084e+06	738101	1.3629e+07	2.05384e+07	1.20278e+07	1.84373e+07	1.74957e+07	1.79144e+07	1.93897e+07	1.26796e+07	2.12679e+06	1.55382e+07	1.26521e+06	2.48507e+06	1.36155e+07	1.08461e+07	1.87881e+07	1.81579e+07	2.14416e+07	1.85165e+07	2.0699e+07	1.83591e+07	1.83904e+07
M192T204	192.05	203.5	3.4	212333	240390	155894	247001	231253	181030	199662	266329	247598	179508	73262.1	63381.5	307486	96048.6	289553	68042.9	282279	184720	209960	213542	73098.2	72155.7	181745	256158	107200	223646	227328	225314	230081	214732	223084
M192T361	192.066	361.4	6	1.16919e+06	4.6365e+06	7.78177e+06	982670	1.2376e+06	5.08316e+06	5.82986e+06	6.44406e+06	5.08906e+06	5.18504e+06	5.32132e+06	1.05645e+06	4.25326e+06	7.94995e+06	5.54134e+06	5.18435e+06	550765	350870	887026	1.41491e+06	3.78482e+06	4.03881e+06	218803	827216	4.33335e+06	4.34234e+06	4.03827e+06	4.55838e+06	1.32446e+06	4.34364e+06	4.30381e+06
M192T373	192.067	372.5	6.2	1.13868e+07	7.48033e+06	9.60756e+06	9.39961e+06	8.46149e+06	6.291e+06	7.40274e+06	6.93087e+06	7.52481e+06	9.92236e+06	8.51919e+06	1.10125e+07	6.67838e+06	7.34657e+06	7.59215e+06	9.57074e+06	1.07618e+07	8.80308e+06	1.13816e+07	9.73856e+06	1.01058e+07	8.78296e+06	9.98478e+06	1.30735e+07	7.96376e+06	8.30563e+06	7.98575e+06	8.31168e+06	6.04931e+06	8.67897e+06	7.96314e+06
M192T429	191.952	429.4	7.2	115509	250008	442440	299790	585303	241251	88143.3	204839	309217	148509	544228	135098	370161	233955	197546	378040	269699	310921	226052	170658	235201	154745	279353	548926	324482	366305	246118	201912	279521	265721	255749
M192T439	192.066	438.9	7.3	680103	360664	349822	1.39318e+06	1.00458e+06	740330	206781	382134	929093	1.00405e+06	306852	400889	246474	180490	300672	172457	272099	278733	1.32398e+06	197466	389875	1.42602e+06	329407	379974	740497	689994	719896	740244	739710	796895	565292
M192T57	191.932	56.5	0.9	496026	485640	531970	484827	2.43959e+06	434516	859616	545504	895260	583448	1.08696e+06	938494	433155	513187	2.70463e+06	632887	632371	639558	1.03854e+06	651229	564877	699003	728312	1.70027e+06	508925	492912	518950	511323	399364	393394	381447
M192T70	192.023	70.2	1.2	4.25228e+06	3.62587e+06	3.4298e+06	1.26422e+07	3.33637e+06	3.91915e+06	3.11254e+07	7.87512e+06	1.07737e+07	2.87012e+06	6.16317e+06	2.93951e+06	8.11695e+06	2.78094e+06	1.26052e+07	7.72474e+06	3.15037e+06	2.5521e+06	3.45639e+06	1.38723e+07	3.09482e+06	2.13824e+07	1.01986e+07	7.37202e+06	6.0241e+06	5.88552e+06	5.38037e+06	5.36627e+06	8.06408e+06	6.23204e+06	2.63802e+06
M192T85	191.994	85.1	1.4	2.66851e+08	1.77146e+08	2.87303e+08	1.67164e+08	2.82879e+08	1.50083e+08	2.33147e+08	1.94272e+08	1.45698e+08	2.13649e+08	2.77554e+08	2.37323e+08	1.63418e+08	2.08212e+08	1.62818e+08	2.40653e+08	3.56316e+08	2.08063e+08	2.45961e+08	3.91726e+08	3.47013e+08	2.23067e+08	2.09996e+08	3.19125e+08	1.95547e+08	2.10754e+08	1.93615e+08	1.93698e+08	1.61188e+08	1.81478e+08	1.52376e+08
M193T108	193.035	107.5	1.8	6.44264e+06	6.72805e+06	6.67076e+06	6.52133e+06	6.61748e+06	6.27541e+06	6.92542e+06	6.99267e+06	6.53834e+06	6.41347e+06	6.93667e+06	6.64391e+06	6.70461e+06	6.52371e+06	6.51108e+06	6.65172e+06	6.15135e+06	6.5096e+06	6.82562e+06	6.69042e+06	6.8649e+06	7.03521e+06	6.93667e+06	6.76352e+06	6.6203e+06	6.83509e+06	6.76937e+06	6.76887e+06	6.77948e+06	6.59205e+06	6.61052e+06
M193T121	193.037	121.3	2	1.13713e+06	1.2048e+06	1.12618e+06	1.65168e+06	996039	2.03427e+06	824698	1.31347e+06	353017	1.7459e+06	1.14991e+06	1.24363e+06	1.05011e+06	1.53427e+06	801276	748228	1.31264e+06	1.88065e+06	2.18625e+06	979807	2.55868e+06	426723	1.22903e+06	2.14884e+06	1.50299e+06	1.48597e+06	1.49991e+06	1.70333e+06	1.93092e+06	1.51665e+06	1.64786e+06
M193T31	192.911	31.1	0.5	119703	102903	126736	103188	141780	153258	76952.1	82983.6	139500	70713.9	124209	74078.3	95733.7	106971	86016	79714.7	128612	190304	168658	162205	120732	94790.2	158182	83142.5	117912	143774	115149	115402	115663	119442	115201
M193T320	192.975	320.1	5.3	59882.6	79490.4	56653.8	70777.3	59160.8	63669	48683.4	64067.3	80401.3	91250	65511.5	46880.3	55150.7	77297.2	39794.6	42482.9	43534.6	86603.3	49852.4	62516.5	58076.7	52519.1	82493.2	72034.4	70175.9	77579.9	73216.8	77457.1	84200	84458.2	84371.7
M193T361	193.07	361.4	6	473937	2.60499e+06	219563	282066	74146.3	76236	239554	181274	35727.3	748754	36125.6	69224.6	224590	150279	225931	240599	111173	2169.26	1.27376e+06	1.7137e+06	105469	77527.5	2526.51	386733	393272	397496	391155	396471	371201	319189	371585
M193T372	193.07	372.5	6.2	811569	758880	712703	802523	1.55598e+06	891742	1.27566e+06	742068	1.60046e+06	958136	1.36434e+06	1.08991e+06	703771	1.00232e+06	1.01946e+06	1.54395e+06	1.67535e+06	1.12576e+06	2.12078e+06	1.73367e+06	1.62237e+06	868993	1.2515e+06	1.03351e+06	650156	822205	523687	892585	623696	773340	808827
M193T399	193.086	399.4	6.7	3.636e+06	1.12038e+06	1.48906e+06	517689	1.57436e+06	1.76128e+06	523523	970793	1.50409e+06	1.33808e+06	1.80888e+06	2.77569e+06	965760	924834	1.27851e+06	1.06168e+06	628338	1.08588e+06	3.19951e+06	694606	1.0665e+06	1.63309e+06	1.57392e+06	1.39709e+06	1.17592e+06	863064	1.175e+06	1.35886e+06	1.18379e+06	1.08593e+06	706574
M193T429	192.946	428.8	7.1	780384	82116.8	271981	117906	931320	676254	609700	382241	263472	1.18129e+06	605722	941600	2.40443e+06	126522	1.22342e+06	669204	1.17185e+06	2.00877e+06	1.00449e+06	226608	729663	335269	892441	389842	532016	532596	720019	612177	446184	531496	569182
M193T522	192.989	522.4	8.7	937525	710594	1.01553e+06	563882	892411	557522	1.23911e+06	451183	578129	1.50913e+06	90678	821488	709032	611897	894877	1.28634e+06	1.22071e+06	1.03807e+06	549476	1.18966e+06	695044	317967	581194	453636	892925	569391	675810	640079	446652	558377	625928
[truncated: 11,006 more rows]
