# Supplementary material for: The impact of dapagliflozin for the myocardial metabolomic profiles of mice with chronic heart failure induced by a high fat diet
Source: Research Square preprint supplement (doi:10.21203/rs.3.rs-6881055/v1), 2025-06-25
Supplement: Supplementary file 16 [file e9ef65c66188ebae1a1b2abd.xlsx]

## Sheet: Sheet 1
Pathway_ID	Pathway_name	Total	Hits	Up_hits	Down_hits	P value	-Log10(Pvalue)	FDR	Impact	Compounds	Compound_name	links
map00230	Purine metabolism	95	6	2	4	0.000445233	3.35141287600446	0.174022586876921	0.0632	C00008; C00262; C00366; C00559; C01367; C05993	ADP; Hypoxanthine; Uric acid; Deoxyadenosine; 3'-AMP; Acetyl adenylate	http://www.kegg.jp/pathway/map00230+C00008%09blue+C00262%09blue+C00366%09blue+C00559%09red+C01367%09blue+C05993%09red
map04142	Lysosome	4	2	0	2	0.000643337	3.19156164920947	0.174022586876921	0.5	C00008; C00159	ADP; D-Mannose	http://www.kegg.jp/pathway/map04142+C00008%09blue+C00159%09blue
map07034	Eicosanoids	7	2	2	0	0.00220622	2.65635151382098	0.397854703355043	0.2857	C00219; C02165	Arachidonic acid; 12-Keto-tetrahydro-leukotriene B4	http://www.kegg.jp/pathway/map07034+C00219%09red+C02165%09red
map00591	Linoleic acid metabolism	28	3	1	2	0.00300593	2.52202150587726	0.406551687353301	0.1071	C00219; C06426; C14827	Arachidonic acid; Gamma-Linolenic acid; 9(S)-HPODE	http://www.kegg.jp/pathway/map00591+C00219%09red+C06426%09blue+C14827%09blue
map00410	beta-Alanine metabolism	32	3	3	0	0.00441713	2.35485935863711	0.477933972497202	0.0938	C00383; C00864; C01262	Malonate; Pantothenic acid; Anserine	http://www.kegg.jp/pathway/map00410+C00383%09red+C00864%09red+C01262%09red
map04611	Platelet activation	14	2	1	1	0.00911757	2.04012071746634	0.635207088386778	0.1429	C00008; C00219	ADP; Arachidonic acid	http://www.kegg.jp/pathway/map04611+C00008%09blue+C00219%09red
map04071	Sphingolipid signaling pathway	15	2	2	0	0.0104495	1.98090553761508	0.635207088386778	0.1333	C00065; C00836	L-Serine; Sphinganine	http://www.kegg.jp/pathway/map04071+C00065%09red+C00836%09red
map01230	Biosynthesis of amino acids	128	5	4	1	0.0107469	1.96871697496965	0.635207088386778	0.0391	C00065; C00148; C00199; C00449; C15532	L-Serine; L-Proline; D-Ribulose 5-phosphate; Saccharopine; N-a-Acetylcitrulline	http://www.kegg.jp/pathway/map01230+C00065%09red+C00148%09red+C00199%09red+C00449%09blue+C15532%09red
map00190	Oxidative phosphorylation	16	2	1	1	0.0118619	1.92584408136918	0.635207088386778	0.125	C00008; C00013	ADP; Pyrophosphate	http://www.kegg.jp/pathway/map00190+C00008%09blue+C00013%09red
map00627	Aminobenzoate degradation	86	4	3	1	0.0123795	1.90729848119837	0.635207088386778	0.0465	C00156; C00530; C00632; C01108	4-Hydroxybenzoic acid; Hydroquinone; 3-Hydroxyanthranilate; 1,2,3-Trihydroxybenzene	http://www.kegg.jp/pathway/map00627+C00156%09blue+C00530%09red+C00632%09red+C01108%09red
map04974	Protein digestion and absorption	47	3	2	1	0.0129155	1.88888924413433	0.635207088386778	0.0638	C00065; C00148; C00463	L-Serine; L-Proline; Indole	http://www.kegg.jp/pathway/map04974+C00065%09red+C00148%09red+C00463%09blue
map00333	Prodigiosin biosynthesis	18	2	2	0	0.0149215	1.82618815060826	0.6727099764949	0.1111	C00148; C02679	L-Proline; Dodecanoic acid	http://www.kegg.jp/pathway/map00333+C00148%09red+C02679%09red
map04080	Neuroactive ligand-receptor interaction	52	3	1	2	0.0169629	1.7704995463198	0.705918179599359	0.0577	C00008; C02165; C16511	ADP; 12-Keto-tetrahydro-leukotriene B4; L-Homocysteic acid	http://www.kegg.jp/pathway/map04080+C00008%09blue+C02165%09red+C16511%09blue
map04976	Bile secretion	97	4	1	3	0.0185452	1.73176891386247	0.706786254785453	0.0412	C00318; C00366; C02165; C03990	L-Carnitine; Uric acid; 12-Keto-tetrahydro-leukotriene B4; Lithocholic acid	http://www.kegg.jp/pathway/map04976+C00318%09blue+C00366%09blue+C02165%09red+C03990%09blue
map05012	Parkinson disease	21	2	1	1	0.0200713	1.69742477816905	0.706786254785453	0.0952	C00008; C00013	ADP; Pyrophosphate	http://www.kegg.jp/pathway/map05012+C00008%09blue+C00013%09red
map07110	Benzoic acid family	2	1	0	1	0.0209031	1.67978918746888	0.706786254785453	0.5	C00156	4-Hydroxybenzoic acid	http://www.kegg.jp/pathway/map07110+C00156%09blue
map04714	Thermogenesis	23	2	0	2	0.0238586	1.62235523138262	0.759264531063417	0.087	C00008; C00318	ADP; L-Carnitine	http://www.kegg.jp/pathway/map04714+C00008%09blue+C00318%09blue
map00363	Bisphenol degradation	25	2	1	1	0.0279141	1.55417708194724	0.794815965482655	0.08	C00156; C00530	4-Hydroxybenzoic acid; Hydroquinone	http://www.kegg.jp/pathway/map00363+C00156%09blue+C00530%09red
map00600	Sphingolipid metabolism	25	2	2	0	0.0279141	1.55417708194724	0.794815965482655	0.08	C00065; C00836	L-Serine; Sphinganine	http://www.kegg.jp/pathway/map00600+C00065%09red+C00836%09red
map00240	Pyrimidine metabolism	65	3	3	0	0.0304604	1.51626433860379	0.823953932484051	0.0462	C00055; C00178; C00383	CMP; Thymine; Malonate	http://www.kegg.jp/pathway/map00240+C00055%09red+C00178%09red+C00383%09red
map04978	Mineral absorption	29	2	2	0	0.0367799	1.43439003513433	0.947519017187711	0.069	C00065; C00148	L-Serine; L-Proline	http://www.kegg.jp/pathway/map04978+C00065%09red+C00148%09red
map05022	Pathways of neurodegeneration - multiple diseases	32	2	1	1	0.044043	1.356123538124	0.966145896932272	0.0625	C00008; C00013	ADP; Pyrophosphate	http://www.kegg.jp/pathway/map05022+C00008%09blue+C00013%09red
map01100	Metabolic pathways	2827	37	23	14	0.0446162	1.35050702231105	0.966145896932272	0.0131	C00008; C00055; C00065; C00148; C00156; C00159; C00178; C00199; C00219; C00262; C00300; C00325; C00366; C00383; C00423; C00449; C00463; C00530; C00534; C00559; C00632; C00785; C00836; C00864; C01197; C01262; C01367; C01879; C02165; C02679; C05580; C05993; C06426; C06554; C14827; C15532; C18054	ADP; CMP; L-Serine; L-Proline; 4-Hydroxybenzoic acid; D-Mannose; Thymine; D-Ribulose 5-phosphate; Arachidonic acid; Hypoxanthine; Creatine; GDP-L-fucose; Uric acid; Malonate; trans-Cinnamate; Saccharopine; Indole; Hydroquinone; Pyridoxamine; Deoxyadenosine; 3-Hydroxyanthranilate; Urocanic acid; Sphinganine; Pantothenic acid; Caffeate; Anserine; 3'-AMP; Pyroglutamic acid; 12-Keto-tetrahydro-leukot…	http://www.kegg.jp/pathway/map01100+C00008%09blue+C00055%09red+C00065%09red+C00148%09red+C00156%09blue+C00159%09blue+C00178%09red+C00199%09red+C00219%09red+C00262%09blue+C00300%09blue+C00325%09blue+C00366%09blue+C00383%09red+C00423%09red+C00449%09blue+C00463%09blue+C00530%09red+C00534%09red+C00559%09red+C00632%09red+C00785%09red+C00836%09red+C00864%09red+C01197%09red+C01262%09red+C01367%09blue+C0…
map00330	Arginine and proline metabolism	78	3	2	1	0.0482274	1.31670571643396	0.966145896932272	0.0385	C00148; C00300; C03564	L-Proline; Creatine; 1-Pyrroline-2-carboxylic acid	http://www.kegg.jp/pathway/map00330+C00148%09red+C00300%09blue+C03564%09red
map00350	Tyrosine metabolism	78	3	1	2	0.0482274	1.31670571643396	0.966145896932272	0.0385	C00530; C04368; C05580	Hydroquinone; Beta-Tyrosine; 3,4-Dihydroxymandelic acid	http://www.kegg.jp/pathway/map00350+C00530%09red+C04368%09blue+C05580%09blue
map03320	PPAR signaling pathway	5	1	1	0	0.0514536	1.28858441066978	0.966145896932272	0.2	C02165	12-Keto-tetrahydro-leukotriene B4	http://www.kegg.jp/pathway/map03320+C02165%09red
map04068	FoxO signaling pathway	5	1	0	1	0.0514536	1.28858441066978	0.966145896932272	0.2	C00008	ADP	http://www.kegg.jp/pathway/map04068+C00008%09blue
map07216	Catecholamine transferase inhibitors	5	1	1	0	0.0514536	1.28858441066978	0.966145896932272	0.2	C01108	1,2,3-Trihydroxybenzene	http://www.kegg.jp/pathway/map07216+C01108%09red
map04750	Inflammatory mediator regulation of TRP channels	35	2	2	0	0.0517897	1.28575655337159	0.966145896932272	0.0571	C00219; C02165	Arachidonic acid; 12-Keto-tetrahydro-leukotriene B4	http://www.kegg.jp/pathway/map04750+C00219%09red+C02165%09red
map02010	ABC transporters	137	4	3	1	0.0552269	1.25784924601944	0.99592529828337	0.0292	C00065; C00148; C00159; C00559	L-Serine; L-Proline; D-Mannose; Deoxyadenosine	http://www.kegg.jp/pathway/map02010+C00065%09red+C00148%09red+C00159%09blue+C00559%09red
map05230	Central carbon metabolism in cancer	37	2	2	0	0.0572049	1.24256651971891	0.998318344572785	0.0541	C00065; C00148	L-Serine; L-Proline	http://www.kegg.jp/pathway/map05230+C00065%09red+C00148%09red
map04912	GnRH signaling pathway	6	1	1	0	0.061427	1.21164088980315	0.999396748060982	0.1667	C00219	Arachidonic acid	http://www.kegg.jp/pathway/map04912+C00219%09red
map05140	Leishmaniasis	6	1	1	0	0.061427	1.21164088980315	0.999396748060982	0.1667	C00219	Arachidonic acid	http://www.kegg.jp/pathway/map05140+C00219%09red
map04977	Vitamin digestion and absorption	39	2	2	0	0.0628087	1.2019804161071	0.999396748060982	0.0513	C00534; C00864	Pyridoxamine; Pantothenic acid	http://www.kegg.jp/pathway/map04977+C00534%09red+C00864%09red
map04726	Serotonergic synapse	42	2	2	0	0.071546	1.14541466592793	1	0.0476	C00219; C02165	Arachidonic acid; 12-Keto-tetrahydro-leukotriene B4	http://www.kegg.jp/pathway/map04726+C00219%09red+C02165%09red
map04666	Fc gamma R-mediated phagocytosis	8	1	1	0	0.081065	1.09116656569448	1	0.125	C00219	Arachidonic acid	http://www.kegg.jp/pathway/map04666+C00219%09red
map00340	Histidine metabolism	47	2	2	0	0.086914	1.06091015883094	1	0.0426	C00785; C01262	Urocanic acid; Anserine	http://www.kegg.jp/pathway/map00340+C00785%09red+C01262%09red
map00402	Benzoxazinoid biosynthesis	9	1	0	1	0.0907317	1.04224072748829	1	0.1111	C00463	Indole	http://www.kegg.jp/pathway/map00402+C00463%09blue
map04730	Long-term depression	9	1	1	0	0.0907317	1.04224072748829	1	0.1111	C00219	Arachidonic acid	http://www.kegg.jp/pathway/map04730+C00219%09red
map00260	Glycine, serine and threonine metabolism	50	2	1	1	0.0965691	1.01516201579477	1	0.04	C00065; C00300	L-Serine; Creatine	http://www.kegg.jp/pathway/map00260+C00065%09red+C00300%09blue
map04217	Necroptosis	10	1	1	0	0.100298	0.998706237852093	1	0.1	C00219	Arachidonic acid	http://www.kegg.jp/pathway/map04217+C00219%09red
map00970	Aminoacyl-tRNA biosynthesis	52	2	2	0	0.103169	0.986450770033197	1	0.0385	C00065; C00148	L-Serine; L-Proline	http://www.kegg.jp/pathway/map00970+C00065%09red+C00148%09red
map00195	Photosynthesis	11	1	0	1	0.109766	0.95953286887394	1	0.0909	C00008	ADP	http://www.kegg.jp/pathway/map00195+C00008%09blue
map00472	D-Arginine and D-ornithine metabolism	11	1	1	0	0.109766	0.95953286887394	1	0.0909	C03564	1-Pyrroline-2-carboxylic acid	http://www.kegg.jp/pathway/map00472+C03564%09red
map04625	C-type lectin receptor signaling pathway	11	1	0	1	0.109766	0.95953286887394	1	0.0909	C00159	D-Mannose	http://www.kegg.jp/pathway/map04625+C00159%09blue
map04664	Fc epsilon RI signaling pathway	11	1	1	0	0.109766	0.95953286887394	1	0.0909	C00219	Arachidonic acid	http://www.kegg.jp/pathway/map04664+C00219%09red
map04745	Phototransduction - fly	11	1	1	0	0.109766	0.95953286887394	1	0.0909	C00219	Arachidonic acid	http://www.kegg.jp/pathway/map04745+C00219%09red
map00051	Fructose and mannose metabolism	54	2	0	2	0.10989	0.959041226125159	1	0.037	C00159; C00325	D-Mannose; GDP-L-fucose	http://www.kegg.jp/pathway/map00051+C00159%09blue+C00325%09blue
map04921	Oxytocin signaling pathway	12	1	1	0	0.119135	0.92395993803704	1	0.0833	C00219	Arachidonic acid	http://www.kegg.jp/pathway/map04921+C00219%09red
map01240	Biosynthesis of cofactors	324	6	4	2	0.123348	0.908867429322901	1	0.0185	C00008; C00065; C00156; C00199; C00632; C00864	ADP; L-Serine; 4-Hydroxybenzoic acid; D-Ribulose 5-phosphate; 3-Hydroxyanthranilate; Pantothenic acid	http://www.kegg.jp/pathway/map01240+C00008%09blue+C00065%09red+C00156%09blue+C00199%09red+C00632%09red+C00864%09red
map00061	Fatty acid biosynthesis	58	2	2	0	0.123665	0.907752125928316	1	0.0345	C00383; C02679	Malonate; Dodecanoic acid	http://www.kegg.jp/pathway/map00061+C00383%09red+C02679%09red
map05146	Amoebiasis	13	1	1	0	0.128407	0.891409774364142	1	0.0769	C00219	Arachidonic acid	http://www.kegg.jp/pathway/map05146+C00219%09red
map00360	Phenylalanine metabolism	60	2	1	1	0.130705	0.883709197193253	1	0.0333	C00423; C05598	trans-Cinnamate; Phenylacetylglycine	http://www.kegg.jp/pathway/map00360+C00423%09red+C05598%09blue
map04923	Regulation of lipolysis in adipocytes	14	1	1	0	0.137584	0.861433344818861	1	0.0714	C00219	Arachidonic acid	http://www.kegg.jp/pathway/map04923+C00219%09red
map05014	Amyotrophic lateral sclerosis	14	1	0	1	0.137584	0.861433344818861	1	0.0714	C00008	ADP	http://www.kegg.jp/pathway/map05014+C00008%09blue
map04270	Vascular smooth muscle contraction	16	1	1	0	0.155651	0.807846834260056	1	0.0625	C00219	Arachidonic acid	http://www.kegg.jp/pathway/map04270+C00219%09red
map00940	Phenylpropanoid biosynthesis	68	2	2	0	0.159713	0.796660703258439	1	0.0294	C00423; C01197	trans-Cinnamate; Caffeate	http://www.kegg.jp/pathway/map00940+C00423%09red+C01197%09red
map04924	Renin secretion	17	1	0	1	0.164545	0.783715075765833	1	0.0588	C00008	ADP	http://www.kegg.jp/pathway/map04924+C00008%09blue
map00362	Benzoate degradation	72	2	1	1	0.174638	0.757860290403418	1	0.0278	C00156; C00530	4-Hydroxybenzoic acid; Hydroquinone	http://www.kegg.jp/pathway/map00362+C00156%09blue+C00530%09red
map04723	Retrograde endocannabinoid signaling	19	1	1	0	0.182057	0.739793675108964	1	0.0526	C00219	Arachidonic acid	http://www.kegg.jp/pathway/map04723+C00219%09red
map01040	Biosynthesis of unsaturated fatty acids	74	2	1	1	0.182186	0.739484980694082	1	0.027	C00219; C06426	Arachidonic acid; Gamma-Linolenic acid	http://www.kegg.jp/pathway/map01040+C00219%09red+C06426%09blue
map00590	Arachidonic acid metabolism	75	2	2	0	0.185979	0.730537042012618	1	0.0267	C00219; C02165	Arachidonic acid; 12-Keto-tetrahydro-leukotriene B4	http://www.kegg.jp/pathway/map00590+C00219%09red+C02165%09red
map00740	Riboflavin metabolism	20	1	1	0	0.190676	0.719703376991394	1	0.05	C00199	D-Ribulose 5-phosphate	http://www.kegg.jp/pathway/map00740+C00199%09red
map04152	AMPK signaling pathway	22	1	0	1	0.207648	0.682671794386234	1	0.0455	C00008	ADP	http://www.kegg.jp/pathway/map04152+C00008%09blue
map04925	Aldosterone synthesis and secretion	22	1	1	0	0.207648	0.682671794386234	1	0.0455	C00219	Arachidonic acid	http://www.kegg.jp/pathway/map04925+C00219%09red
map00220	Arginine biosynthesis	23	1	1	0	0.216002	0.665541643323552	1	0.0435	C15532	N-a-Acetylcitrulline	http://www.kegg.jp/pathway/map00220+C15532%09red
map00710	Carbon fixation in photosynthetic organisms	23	1	1	0	0.216002	0.665541643323552	1	0.0435	C00199	D-Ribulose 5-phosphate	http://www.kegg.jp/pathway/map00710+C00199%09red
map00791	Atrazine degradation	23	1	1	0	0.216002	0.665541643323552	1	0.0435	C06554	Cyanuric acid	http://www.kegg.jp/pathway/map00791+C06554%09red
map00380	Tryptophan metabolism	83	2	1	1	0.216685	0.664171305728957	1	0.0241	C00463; C00632	Indole; 3-Hydroxyanthranilate	http://www.kegg.jp/pathway/map00380+C00463%09blue+C00632%09red
map01502	Vancomycin resistance	24	1	1	0	0.22427	0.649229542523368	1	0.0417	C00065	L-Serine	http://www.kegg.jp/pathway/map01502+C00065%09red
map04913	Ovarian steroidogenesis	24	1	1	0	0.22427	0.649229542523368	1	0.0417	C00219	Arachidonic acid	http://www.kegg.jp/pathway/map04913+C00219%09red
map00680	Methane metabolism	86	2	2	0	0.228328	0.64144159031705	1	0.0233	C00065; C00199	L-Serine; D-Ribulose 5-phosphate	http://www.kegg.jp/pathway/map00680+C00065%09red+C00199%09red
map00130	Ubiquinone and other terpenoid-quinone biosynthesis	92	2	1	1	0.251737	0.599052264905761	1	0.0217	C00156; C00423	4-Hydroxybenzoic acid; trans-Cinnamate	http://www.kegg.jp/pathway/map00130+C00156%09blue+C00423%09red
map00750	Vitamin B6 metabolism	29	1	1	0	0.264336	0.577843795758746	1	0.0345	C00534	Pyridoxamine	http://www.kegg.jp/pathway/map00750+C00534%09red
map04216	Ferroptosis	29	1	1	0	0.264336	0.577843795758746	1	0.0345	C00219	Arachidonic acid	http://www.kegg.jp/pathway/map04216+C00219%09red
map00770	Pantothenate and CoA biosynthesis	30	1	1	0	0.272101	0.565269633150395	1	0.0333	C00864	Pantothenic acid	http://www.kegg.jp/pathway/map00770+C00864%09red
map00405	Phenazine biosynthesis	31	1	1	0	0.279786	0.553174584346442	1	0.0323	C18054	2-Amino-2-deoxyisochorismate	http://www.kegg.jp/pathway/map00405+C18054%09red
map00620	Pyruvate metabolism	31	1	1	0	0.279786	0.553174584346442	1	0.0323	C05993	Acetyl adenylate	http://www.kegg.jp/pathway/map00620+C05993%09red
map00332	Carbapenem biosynthesis	32	1	1	0	0.28739	0.541527985783657	1	0.0312	C00148	L-Proline	http://www.kegg.jp/pathway/map00332+C00148%09red
map00401	Novobiocin biosynthesis	32	1	1	0	0.28739	0.541527985783657	1	0.0312	C00148	L-Proline	http://www.kegg.jp/pathway/map00401+C00148%09red
map04742	Taste transduction	32	1	0	1	0.28739	0.541527985783657	1	0.0312	C00008	ADP	http://www.kegg.jp/pathway/map04742+C00008%09blue
map01061	Biosynthesis of phenylpropanoids	103	2	1	1	0.294785	0.530494297216892	1	0.0194	C00156; C01197	4-Hydroxybenzoic acid; Caffeate	http://www.kegg.jp/pathway/map01061+C00156%09blue+C01197%09red
map00920	Sulfur metabolism	33	1	1	0	0.294916	0.530302005319618	1	0.0303	C00065	L-Serine	http://www.kegg.jp/pathway/map00920+C00065%09red
map00400	Phenylalanine, tyrosine and tryptophan biosynthesis	34	1	0	1	0.302363	0.519471304024203	1	0.0294	C00463	Indole	http://www.kegg.jp/pathway/map00400+C00463%09blue
map00030	Pentose phosphate pathway	35	1	1	0	0.309733	0.509012747009061	1	0.0286	C00199	D-Ribulose 5-phosphate	http://www.kegg.jp/pathway/map00030+C00199%09red
map00300	Lysine biosynthesis	35	1	0	1	0.309733	0.509012747009061	1	0.0286	C00449	Saccharopine	http://www.kegg.jp/pathway/map00300+C00449%09blue
map01065	Biosynthesis of alkaloids derived from histidine and purine	35	1	1	0	0.309733	0.509012747009061	1	0.0286	C07474	Pilocarpine	http://www.kegg.jp/pathway/map01065+C07474%09red
map00520	Amino sugar and nucleotide sugar metabolism	108	2	0	2	0.314283	0.502679105422561	1	0.0185	C00159; C00325	D-Mannose; GDP-L-fucose	http://www.kegg.jp/pathway/map00520+C00159%09blue+C00325%09blue
map00121	Secondary bile acid biosynthesis	36	1	0	1	0.317026	0.498905155002773	1	0.0278	C03990	Lithocholic acid	http://www.kegg.jp/pathway/map00121+C03990%09blue
map00480	Glutathione metabolism	38	1	0	1	0.331385	0.479666669328836	1	0.0263	C01879	Pyroglutamic acid	http://www.kegg.jp/pathway/map00480+C01879%09blue
map01200	Carbon metabolism	114	2	2	0	0.337534	0.471682392825947	1	0.0175	C00065; C00199	L-Serine; D-Ribulose 5-phosphate	http://www.kegg.jp/pathway/map01200+C00065%09red+C00199%09red
map00261	Monobactam biosynthesis	39	1	1	0	0.338453	0.470501404296738	1	0.0256	C00065	L-Serine	http://www.kegg.jp/pathway/map00261+C00065%09red
map00908	Zeatin biosynthesis	39	1	0	1	0.338453	0.470501404296738	1	0.0256	C00008	ADP	http://www.kegg.jp/pathway/map00908+C00008%09blue
map00460	Cyanoamino acid metabolism	45	1	1	0	0.379341	0.420970128748389	1	0.0222	C00065	L-Serine	http://www.kegg.jp/pathway/map00460+C00065%09red
map00052	Galactose metabolism	46	1	0	1	0.385909	0.413514609486485	1	0.0217	C00159	D-Mannose	http://www.kegg.jp/pathway/map00052+C00159%09blue
map00623	Toluene degradation	47	1	0	1	0.392409	0.406260675593033	1	0.0213	C00156	4-Hydroxybenzoic acid	http://www.kegg.jp/pathway/map00623+C00156%09blue
map00404	Staurosporine biosynthesis	48	1	1	0	0.398841	0.399199682462683	1	0.0208	C00148	L-Proline	http://www.kegg.jp/pathway/map00404+C00148%09red
map00640	Propanoate metabolism	48	1	1	0	0.398841	0.399199682462683	1	0.0208	C05984	2-Hydroxybutyric acid	http://www.kegg.jp/pathway/map00640+C05984%09red
map00071	Fatty acid degradation	50	1	1	0	0.411505	0.385624571121012	1	0.02	C00823	1-Hexadecanol	http://www.kegg.jp/pathway/map00071+C00823%09red
map00310	Lysine degradation	50	1	0	1	0.411505	0.385624571121012	1	0.02	C00449	Saccharopine	http://www.kegg.jp/pathway/map00310+C00449%09blue
map00540	Lipopolysaccharide biosynthesis	54	1	1	0	0.43605	0.360463669440836	1	0.0185	C00199	D-Ribulose 5-phosphate	http://www.kegg.jp/pathway/map00540+C00199%09red
map01060	Biosynthesis of plant secondary metabolites	141	2	2	0	0.438599	0.357931896223722	1	0.0142	C00065; C00423	L-Serine; trans-Cinnamate	http://www.kegg.jp/pathway/map01060+C00065%09red+C00423%09red
map00040	Pentose and glucuronate interconversions	56	1	1	0	0.447942	0.348778608088106	1	0.0179	C00199	D-Ribulose 5-phosphate	http://www.kegg.jp/pathway/map00040+C00199%09red
map00997	Biosynthesis of various secondary metabolites - part 3	56	1	1	0	0.447942	0.348778608088106	1	0.0179	C00065	L-Serine	http://www.kegg.jp/pathway/map00997+C00065%09red
map02060	Phosphotransferase system (PTS)	57	1	0	1	0.453794	0.343140829090331	1	0.0175	C00159	D-Mannose	http://www.kegg.jp/pathway/map02060+C00159%09blue
map00790	Folate biosynthesis	58	1	0	1	0.459586	0.33763303959212	1	0.0172	C00156	4-Hydroxybenzoic acid	http://www.kegg.jp/pathway/map00790+C00156%09blue
map00630	Glyoxylate and dicarboxylate metabolism	62	1	1	0	0.482155	0.316813739551985	1	0.0161	C00065	L-Serine	http://www.kegg.jp/pathway/map00630+C00065%09red
map00270	Cysteine and methionine metabolism	63	1	1	0	0.48765	0.311891733309536	1	0.0159	C00065	L-Serine	http://www.kegg.jp/pathway/map00270+C00065%09red
map01059	Biosynthesis of enediyne antibiotics	63	1	1	0	0.48765	0.311891733309536	1	0.0159	C18054	2-Amino-2-deoxyisochorismate	http://www.kegg.jp/pathway/map01059+C18054%09red
map01070	Biosynthesis of plant hormones	68	1	1	0	0.514278	0.288802214661612	1	0.0147	C00423	trans-Cinnamate	http://www.kegg.jp/pathway/map01070+C00423%09red
map01220	Degradation of aromatic compounds	263	3	2	1	0.526626	0.278498081079818	1	0.0114	C00156; C00423; C01197	4-Hydroxybenzoic acid; trans-Cinnamate; Caffeate	http://www.kegg.jp/pathway/map01220+C00156%09blue+C00423%09red+C01197%09red
map00941	Flavonoid biosynthesis	74	1	1	0	0.544437	0.264052237148211	1	0.0135	C12136	(-)-Epigallocatechin	http://www.kegg.jp/pathway/map00941+C12136%09red
map00522	Biosynthesis of 12-, 14- and 16-membered macrolides	79	1	1	0	0.568155	0.245532929003187	1	0.0127	C11956	Avermectin A2b aglycone	http://www.kegg.jp/pathway/map00522+C11956%09red
map00998	Biosynthesis of various secondary metabolites - part 2	81	1	1	0	0.577298	0.238599688319066	1	0.0123	C00423	trans-Cinnamate	http://www.kegg.jp/pathway/map00998+C00423%09red
map00361	Chlorocyclohexane and chlorobenzene degradation	83	1	1	0	0.586251	0.231916613982192	1	0.012	C00530	Hydroquinone	http://www.kegg.jp/pathway/map00361+C00530%09red
map00541	O-Antigen nucleotide sugar biosynthesis	87	1	0	1	0.603599	0.219251446399868	1	0.0115	C00325	GDP-L-fucose	http://www.kegg.jp/pathway/map00541+C00325%09blue
map00982	Drug metabolism - cytochrome P450	87	1	1	0	0.603599	0.219251446399868	1	0.0115	C16587	3-Carbamoyl-2-phenylpropionaldehyde	http://www.kegg.jp/pathway/map00982+C16587%09red
map01120	Microbial metabolism in diverse environments	998	10	8	2	0.617639	0.209265346494203	1	0.01	C00065; C00156; C00199; C00366; C00423; C00530; C00534; C00632; C01108; C06554	L-Serine; 4-Hydroxybenzoic acid; D-Ribulose 5-phosphate; Uric acid; trans-Cinnamate; Hydroquinone; Pyridoxamine; 3-Hydroxyanthranilate; 1,2,3-Trihydroxybenzene; Cyanuric acid	http://www.kegg.jp/pathway/map01120+C00065%09red+C00156%09blue+C00199%09red+C00366%09blue+C00423%09red+C00530%09red+C00534%09red+C00632%09red+C01108%09red+C06554%09red
map01212	Fatty acid metabolism	122	1	1	0	0.727832	0.137968855343233	1	0.0082	C00383	Malonate	http://www.kegg.jp/pathway/map01212+C00383%09red
map01110	Biosynthesis of secondary metabolites	2072	14	10	4	0.987996	0.00524497856673915	1	0.0068	C00008; C00065; C00148; C00156; C00199; C00423; C00449; C00463; C00864; C01197; C02679; C07474; C12136; C18054	ADP; L-Serine; L-Proline; 4-Hydroxybenzoic acid; D-Ribulose 5-phosphate; trans-Cinnamate; Saccharopine; Indole; Pantothenic acid; Caffeate; Dodecanoic acid; Pilocarpine; (-)-Epigallocatechin; 2-Amino-2-deoxyisochorismate	http://www.kegg.jp/pathway/map01110+C00008%09blue+C00065%09red+C00148%09red+C00156%09blue+C00199%09red+C00423%09red+C00449%09blue+C00463%09blue+C00864%09red+C01197%09red+C02679%09red+C07474%09red+C12136%09red+C18054%09red
